# Supplementary material for: The H3K4 methyltransferase KMT2D is an essential cofactor for GATA1 at erythroid gene enhancers
Source: Research Square preprint supplement (doi:10.21203/rs.3.rs-7853319/v1), 2025-10-22
Supplement: Supplementary file 1 [file 1add21f994ecb60c8c5cfbc3.xlsx]

## Sheet: DMSOvsIAA_reoproducible_0.05
Supplemental Table 8: Integration analysis of ChIP-seq data for GATA1, H3K4me1, H3K27ac and KMT2D.
seqnames	start	end	width	strand	annotation	geneChr	geneStart	geneEnd	geneLength	geneStrand	geneId	transcriptId	distanceToTSS	ENSEMBL	SYMBOL	GENENAME	flank_txIds	flank_geneIds	flank_gene_distances
chr1	14101	14399	299	*	3' UTR	1	11874	14409	2536	1	100287102	uc010nxr.1	2227	ENSG00000290825	DDX11L1	DEAD/H-box helicase 11 like 1 (pseudogene)	uc001aaa.3;uc010nxq.1;uc010nxr.1;uc001aak.3;uc009vis.3;uc001aae.4;uc009vit.3;uc009viu.3;uc001aac.4;uc001aah.4;uc009viq.3;uc009vir.3;uc009viv.2;uc009viw.2;uc009vix.2;uc009vjd.2;uc009viy.2;uc009viz.2;uc009vjc.1;uc001aai.1;uc010nxs.1;uc009vjb.1;uc009vje.2;uc009vjf.2	100287102;100287102;100287102;641702;653635;653635;653635;653635;653635;653635;653635;653635;653635;653635;653635;653635;653635;653635;653635;653635;653635;653635;653635;653635	0;0;0;21682;0;0;0;0;0;0;0;0;0;0;0;0;0;0;0;0;0;0;0;14971
chr1	15551	15699	149	*	Promoter (1-2kb)	1	14362	16765	2404	2	653635	uc009vis.3	1066	NA	WASH7P	WASP family homolog 7, pseudogene	uc001aaa.3;uc010nxq.1;uc010nxr.1;uc001aak.3;uc009vis.3;uc001aae.4;uc009vit.3;uc009viu.3;uc001aac.4;uc001aah.4;uc009viq.3;uc009vir.3;uc009viv.2;uc009viw.2;uc009vix.2;uc009vjd.2;uc009viy.2;uc009viz.2;uc009vjc.1;uc001aai.1;uc010nxs.1;uc009vjb.1;uc009vje.2;uc009vjf.2	100287102;100287102;100287102;641702;653635;653635;653635;653635;653635;653635;653635;653635;653635;653635;653635;653635;653635;653635;653635;653635;653635;653635;653635;653635	0;0;0;20382;0;0;0;0;0;0;0;0;0;0;0;0;0;0;0;0;0;0;0;13671
chr1	16951	17249	299	*	Promoter (<=1kb)	1	14362	16765	2404	2	653635	uc009vis.3	-186	NA	WASH7P	WASP family homolog 7, pseudogene	uc001aaa.3;uc010nxq.1;uc010nxr.1;uc001aak.3;uc009vis.3;uc001aae.4;uc009vit.3;uc009viu.3;uc001aac.4;uc001aah.4;uc009viq.3;uc009vir.3;uc009viv.2;uc009viw.2;uc009vix.2;uc009vjd.2;uc009viy.2;uc009viz.2;uc009vjc.1;uc001aai.1;uc010nxs.1;uc009vjb.1;uc009vje.2;uc009vjf.2	100287102;100287102;100287102;641702;653635;653635;653635;653635;653635;653635;653635;653635;653635;653635;653635;653635;653635;653635;653635;653635;653635;653635;653635;653635	0;0;0;18832;0;0;0;0;0;0;0;0;0;0;0;0;0;0;0;0;0;0;0;12121
chr1	32151	33349	1199	*	Distal Intergenic	1	16858	29961	13104	2	653635	uc009vjb.1	-2190	NA	WASH7P	WASP family homolog 7, pseudogene	uc001aaa.3;uc010nxq.1;uc010nxr.1;uc001aak.3;uc009vis.3;uc001aae.4;uc009vit.3;uc009viu.3;uc001aac.4;uc001aah.4;uc009viq.3;uc009vir.3;uc009viv.2;uc009viw.2;uc009vix.2;uc009vjd.2;uc009viy.2;uc009viz.2;uc009vjc.1;uc001aai.1;uc010nxs.1;uc009vjb.1;uc009vje.2;uc009vjf.2;uc001aal.1	100287102;100287102;100287102;641702;653635;653635;653635;653635;653635;653635;653635;653635;653635;653635;653635;653635;653635;653635;653635;653635;653635;653635;653635;653635;79501	0;0;0;2732;0;0;0;0;0;0;0;0;0;0;0;0;0;0;0;0;0;0;0;-2781;-35742
chr1	104901	105449	549	*	Distal Intergenic	1	134773	140566	5794	2	729737	uc021oeg.2	35117	NA	LOC729737	uncharacterized LOC729737	uc021oeg.2;uc001aal.1	729737;79501	35117;35810
chr1	110401	110749	349	*	Distal Intergenic	1	134773	140566	5794	2	729737	uc021oeg.2	29817	NA	LOC729737	uncharacterized LOC729737	uc021oeg.2;uc001aal.1	729737;79501	29817;41310
chr1	115351	115849	499	*	Distal Intergenic	1	134773	140566	5794	2	729737	uc021oeg.2	24717	NA	LOC729737	uncharacterized LOC729737	uc021oeg.2;uc001aal.1	729737;79501	24717;46260
chr1	228251	228849	599	*	Distal Intergenic	1	134773	140566	5794	2	729737	uc021oeg.2	-87685	NA	LOC729737	uncharacterized LOC729737	NA	NA	NA
chr1	235651	235849	199	*	Distal Intergenic	1	322037	326938	4902	1	100133331	uc009vjk.2	-86188	NA	NA	NA	NA	NA	NA
chr1	235951	236249	299	*	Distal Intergenic	1	322037	326938	4902	1	100133331	uc009vjk.2	-85788	NA	NA	NA	NA	NA	NA
chr1	252701	252999	299	*	Distal Intergenic	1	322037	326938	4902	1	100133331	uc009vjk.2	-69038	NA	NA	NA	NA	NA	NA
chr1	462851	463399	549	*	Distal Intergenic	1	367659	368597	939	1	729759	uc010nxu.2	95192	ENSG00000284733	OR4F29	olfactory receptor family 4 subfamily F member 29	NA	NA	NA
chr1	724101	724249	149	*	Distal Intergenic	1	700245	714068	13824	2	100288069	uc001abo.3	-10033	NA	LOC100288069	uncharacterized LOC100288069	uc002khh.3;uc001abo.3;uc031pjj.1;uc001abp.2;uc009vjn.2;uc009vjo.2;uc021oem.2;uc031pjk.1;uc010nxx.2	100133331;100288069;643837;643837;643837;643837;643837;643837;79854	-44365;-10033;-38722;-38722;-38722;-38722;-38722;-38929;38653
chr1	1014451	1014599	149	*	Distal Intergenic	1	1007126	1009687	2562	2	401934	uc021oen.1	-4764	ENSG00000237330	RNF223	ring finger protein 223	uc001ack.2;uc021oen.1;uc010nyd.1;uc001acn.2;uc001acr.2;uc001acs.2;uc001act.2;uc001acu.2	375790;401934;54991;54991;54991;54991;54991;54991	58948;-4764;12346;12955;37137;37137;37137;37137
chr1	1196701	1196899	199	*	Intron (uc001adm.4/118424, intron 3 of 6)	1	1189292	1203372	14081	2	118424	uc001adm.4	6473	ENSG00000160087	UBE2J2	ubiquitin conjugating enzyme E2 J2	uc001ady.2;uc001aea.2;uc001aeb.2;uc001aec.1;uc001adm.4;uc001ado.3;uc001adp.3;uc001adq.3;uc001adr.3;uc001aed.3;uc010nyi.2;uc009vjx.3;uc001adk.3;uc001adl.2;uc001adg.3;uc001adh.4;uc001adi.4;uc009vjw.3;uc001adj.1;uc001adt.1;uc001adu.1;uc001adv.2;uc001adw.2;uc001adx.2;uc001ade.3;uc001adf.3	116983;116983;116983;116983;118424;118424;118424;118424;118424;126789;126789;126789;126792;388581;51150;51150;51150;51150;51150;6339;6339;6339;6339;6339;7293;7293	37436;44410;46370;48090;0;0;0;0;0;-47095;-47095;-47567;29072;-14599;-39970;-29254;-29254;-29254;-37353;-18917;-18917;-20590;-20590;-20638;-47153;-47153
chr1	1310401	1310649	249	*	Promoter (<=1kb)	1	1309110	1310562	1453	2	54998	uc009vkb.1	0	ENSG00000175756	AURKAIP1	aurora kinase A interacting protein 1	uc001afm.3;uc009vkd.3;uc002quu.3;uc009vka.3;uc001aer.4;uc001afp.3;uc001afq.3;uc010nyo.2;uc001aew.3;uc001aex.4;uc001aey.4;uc001aez.3;uc001afa.3;uc001afb.1;uc009vkb.1;uc001afd.2;uc001afc.2;uc001afo.4;uc010nyn.1;uc001aeo.3;uc010nym.1;uc001aff.1;uc001afg.1;uc001afi.2;uc001afj.2;uc021oep.1;uc010nyk.2	148413;148413;1855;1855;1855;441869;441869;441869;54587;54587;54587;54587;54587;54998;54998;54998;54998;55052;55052;80772;81669;81669;81669;81669;81669;81669;83756	-24261;-24263;-34844;-34844;-25909;46175;46175;46175;-16486;-16486;-16486;-16486;-13244;-155;0;0;0;32044;32044;50258;16380;17534;23073;24069;24069;24069;43675
chr1	1530351	1530649	299	*	Distal Intergenic	1	1533388	1535476	2089	2	643988	uc021oes.1	4827	ENSG00000228594	FNDC10	fibronectin type III domain containing 10	uc021oet.1;uc001agg.3;uc001agh.3;uc001agi.3;uc001agj.3;uc001agk.3;uc001agl.2;uc001agm.3;uc010nyq.2;uc009vkh.3;uc001agn.3;uc001ago.3;uc001agd.3;uc009vkg.1;uc001age.1;uc021oes.1;uc001agp.3;uc001agq.3;uc001agr.3;uc009vki.3;uc009vkj.2;uc001ags.1;uc001agt.1;uc001agv.1;uc001agw.1;uc001agx.1;uc001agy.1;uc001agz.1;uc001aha.1;uc010nyr.1	142678;142678;142678;142678;142678;142678;142678;142678;142678;142678;142678;142678;29101;29101;29101;643988;8510;8510;8510;8510;984;984;984;984;984;984;984;984;984;984	-20146;-20146;-20146;-20146;-20146;-20146;-20596;-20596;-21041;-28505;-29722;-33837;-20089;-20089;-20089;4827;-36911;-36911;-37513;-37918;46088;0;0;0;0;0;0;0;0;49976
chr1	1583251	1583649	399	*	Intron (uc001ags.1/984, intron 2 of 15)	1	1577747	1580625	2879	2	984	uc010nyr.1	-2626	ENSG00000248333	CDK11B	cyclin dependent kinase 11B	uc021oet.1;uc001agg.3;uc001agh.3;uc001agi.3;uc001agj.3;uc001agk.3;uc001agl.2;uc001agm.3;uc010nyq.2;uc009vkh.3;uc001agn.3;uc001ago.3;uc021oes.1;uc009vkl.2;uc001ahe.4;uc001ahf.4;uc001ahg.4;uc001ahh.4;uc021oeu.1;uc009vkn.2;uc001agp.3;uc001agq.3;uc001agr.3;uc009vki.3;uc001ahi.1;uc009vko.1;uc009vkj.2;uc001ags.1;uc001agt.1;uc001agv.1;uc001agw.1;uc001agx.1;uc001agy.1;uc001agz.1;uc001aha.1;uc010nyr.1	142678;142678;142678;142678;142678;142678;142678;142678;142678;142678;142678;142678;643988;728661;728661;728661;728661;728661;728661;728661;8510;8510;8510;8510;8511;8511;984;984;984;984;984;984;984;984;984;984	32456;32456;32456;32456;32456;32456;32006;32006;31561;24097;22880;18765;-47775;40594;17929;40594;40594;0;24636;40594;15691;15691;15089;14684;-47729;-48137;-6514;0;0;0;0;0;0;0;0;-2626
chr1	1677251	1678249	999	*	Promoter (<=1kb)	1	1592939	1677438	84500	2	728661	uc001ahh.4	0	ENSG00000189339	SLC35E2B	solute carrier family 35 member E2B	uc001aif.3;uc009vky.3;uc010nyv.2;uc001aic.3;uc001aid.4;uc001aie.3;uc009vkx.1;uc001ahj.4;uc009vkp.3;uc009vkq.3;uc009vkr.3;uc009vks.3;uc010nys.2;uc010nyt.1;uc010nyu.1;uc009vkt.1;uc009vku.1;uc009vkv.1;uc001aht.1;uc001ahh.4;uc001ahi.1;uc009vko.1;uc001ags.1;uc001agt.1;uc001agv.1;uc001agw.1;uc001agx.1;uc001agy.1;uc001agz.1;uc001aha.1;uc001ahu.1;uc001ahv.1;uc001ahw.1;uc001ahy.3;uc001aia.2	2782;2782;65220;65220;65220;65220;65220;728642;728642;728642;728642;728642;728642;728642;728642;728642;728642;728642;728642;728661;8511;8511;984;984;984;984;984;984;984;984;984;984;984;9906;9906	144277;144277;11832;31660;32048;33259;18636;-37567;-36860;-36860;-21460;-21460;-21460;-21460;-21460;-21460;-21460;-21460;-21708;0;45873;45465;0;0;0;0;0;0;0;0;-21780;-21780;-21708;0;0
chr1	1822801	1822899	99	*	Promoter (<=1kb)	1	1716725	1822526	105802	2	2782	uc009vky.3	-275	ENSG00000078369	GNB1	G protein subunit beta 1	uc001aih.1;uc001aif.3;uc009vky.3;uc001aii.2;uc001aij.2	163688;2782;2782;339456;339456	-23367;-275;-275;27337;27841
chr1	2161001	2161149	149	*	Promoter (<=1kb)	1	2160134	2241652	81519	1	6497	uc001aja.4	867	ENSG00000157933	SKI	SKI proto-oncogene	uc001aiv.2;uc001aiw.2;uc031pkt.1;uc001aix.2;uc001aiy.3;uc031pku.1;uc031pkv.1;uc001aiq.3;uc001air.3;uc010nyw.2;uc001ais.3;uc010nyx.2;uc001ait.3;uc001aja.4	199990;199990;199990;199990;199990;199990;199990;5590;5590;5590;5590;5590;5590;6497	-34787;-34787;-34787;-21829;-34787;-34787;-34787;179092;155915;155576;124846;84205;60714;0
chr1	2371901	2371999	99	*	Distal Intergenic	1	2336241	2344010	7770	2	5192	uc001ajh.3	-27891	ENSG00000157911	PEX10	peroxisomal biogenesis factor 10	uc001aje.2;uc001ajf.2;uc001ajg.3;uc001ajh.3;uc001ajb.1;uc009vld.3;uc001ajd.1;uc010nyy.2;uc001aji.1;uc010nyz.2;uc009vle.1;uc001ajj.1;uc001ajk.1	11079;11079;5192;5192;79906;79906;79906;79906;9651;9651;9651;9651;9651	48687;48687;-27891;-27891;-48908;-48908;-48908;-48908;-35755;-39624;-39624;-39624;-39624
chr1	2517151	2517449	299	*	Promoter (<=1kb)	1	2517899	2522908	5010	1	127281	uc021oew.1	-450	ENSG00000157870	PRXL2B	peroxiredoxin like 2B	uc021oev.1;uc001ajo.2;uc001ajp.2;uc001ajq.2;uc021oew.1;uc021oex.1;uc001aju.3;uc001ajv.2;uc001ajw.2;uc010nzd.2;uc010nze.2;uc010nzf.2;uc001ajx.2;uc009vlg.1;uc001ajy.2;uc010nzc.1;uc009vlf.1;uc001ajt.1;uc001ajr.3	100133445;115110;115110;115110;127281;127281;127281;127281;127281;127281;127281;127281;127281;79258;79258;8764;8764;8764;8764	-28701;-32867;-32867;-32867;-450;-450;-740;-740;-740;-740;-740;-740;-1068;43511;47032;29346;29346;29346;29346
chr1	2585001	2587849	2849	*	Intron (uc021oey.1/100287898, intron 4 of 6)	1	2522081	2564481	42401	2	79258	uc001ajy.2	-20520	ENSG00000142606	MMEL1	membrane metalloendopeptidase like 1	uc021oey.1;uc009vlg.1;uc001ajy.2	100287898;79258;79258	0;-24041;-20520
chr1	2590351	2590749	399	*	Intron (uc021oey.1/100287898, intron 4 of 6)	1	2522081	2564481	42401	2	79258	uc001ajy.2	-25870	ENSG00000142606	MMEL1	membrane metalloendopeptidase like 1	uc021oey.1;uc009vlg.1;uc001ajy.2	100287898;79258;79258	0;-29391;-25870
chr1	2592651	2593049	399	*	Intron (uc021oey.1/100287898, intron 4 of 6)	1	2522081	2564481	42401	2	79258	uc001ajy.2	-28170	ENSG00000142606	MMEL1	membrane metalloendopeptidase like 1	uc021oey.1;uc009vlg.1;uc001ajy.2	100287898;79258;79258	0;-31691;-28170
chr1	2595301	2595499	199	*	Intron (uc021oey.1/100287898, intron 4 of 6)	1	2522081	2564481	42401	2	79258	uc001ajy.2	-30820	ENSG00000142606	MMEL1	membrane metalloendopeptidase like 1	uc021oey.1;uc009vlg.1;uc001ajy.2	100287898;79258;79258	0;-34341;-30820
chr1	2596101	2596449	349	*	Intron (uc021oey.1/100287898, intron 4 of 6)	1	2522081	2564481	42401	2	79258	uc001ajy.2	-31620	ENSG00000142606	MMEL1	membrane metalloendopeptidase like 1	uc021oey.1;uc009vlg.1;uc001ajy.2	100287898;79258;79258	0;-35141;-31620
chr1	2597751	2597849	99	*	Intron (uc021oey.1/100287898, intron 4 of 6)	1	2522081	2564481	42401	2	79258	uc001ajy.2	-33270	ENSG00000142606	MMEL1	membrane metalloendopeptidase like 1	uc021oey.1;uc009vlg.1;uc001ajy.2	100287898;79258;79258	0;-36791;-33270
chr1	2606351	2606749	399	*	Intron (uc021oey.1/100287898, intron 4 of 6)	1	2522081	2564481	42401	2	79258	uc001ajy.2	-41870	ENSG00000142606	MMEL1	membrane metalloendopeptidase like 1	uc021oey.1;uc009vlg.1;uc001ajy.2	100287898;79258;79258	0;-45391;-41870
chr1	2617051	2617399	349	*	Intron (uc021oey.1/100287898, intron 4 of 6)	1	2522081	2564481	42401	2	79258	uc001ajy.2	-52570	ENSG00000142606	MMEL1	membrane metalloendopeptidase like 1	uc021oey.1	100287898	0
chr1	2619051	2619399	349	*	Intron (uc021oey.1/100287898, intron 4 of 6)	1	2522081	2564481	42401	2	79258	uc001ajy.2	-54570	ENSG00000142606	MMEL1	membrane metalloendopeptidase like 1	uc021oey.1	100287898	0
chr1	2625501	2625899	399	*	Intron (uc021oey.1/100287898, intron 4 of 6)	1	2522081	2564481	42401	2	79258	uc001ajy.2	-61020	ENSG00000142606	MMEL1	membrane metalloendopeptidase like 1	uc021oey.1	100287898	0
chr1	3691351	3691749	399	*	Promoter (1-2kb)	1	3689352	3692546	3195	1	388588	uc001akw.4	1999	ENSG00000235169	SMIM1	small integral membrane protein 1 (Vel blood group)	uc001akv.2;uc031pkx.1;uc001akw.4;uc001akt.4;uc009vlm.3;uc021ofj.1;uc021ofk.1;uc021ofl.1;uc001akx.1;uc001akp.3;uc021ofb.1;uc021ofc.1;uc021ofd.1;uc021ofe.1;uc021off.1;uc010nzj.2;uc001akr.3;uc001aks.3;uc009vlk.2;uc021ofg.1;uc021ofh.1;uc021ofi.1;uc010nzk.2;uc010nzl.2;uc001aky.2;uc010nzm.1;uc031pky.1	148870;388588;388588;57212;57212;57212;57212;57212;57470;7161;7161;7161;7161;7161;7161;7161;7161;7161;7161;7161;7161;7161;7161;7161;9731;9731;9731	22386;0;0;-28016;-27414;-27414;-27414;-27414;21319;122222;122222;122222;122222;122222;122222;84115;84115;84115;84115;84115;84115;84115;76741;47309;82048;82048;61967
chr1	3724451	3724599	149	*	Distal Intergenic	1	3696784	3713068	16285	2	57470	uc001akx.1	-11383	ENSG00000130764	LRRC47	leucine rich repeat containing 47	uc001akv.2;uc009vln.1;uc001ala.1;uc009vlo.1;uc001alb.3;uc001alc.3;uc001ald.3;uc001ale.3;uc009vlp.3;uc009vlq.3;uc009vlr.3;uc010nzn.2;uc031pkx.1;uc001akw.4;uc001akx.1;uc001aky.2;uc010nzm.1;uc031pky.1;uc001akz.3	148870;1677;1677;1677;1677;1677;1677;1677;1677;1677;1677;1677;388588;388588;57470;9731;9731;9731;9731	55486;-49246;-49246;-49246;-49246;-49246;-49246;-49246;-49246;-49246;-49246;-49246;0;0;-11383;49198;49198;29117;49198
chr1	6052051	6052399	349	*	Promoter (<=1kb)	1	6052358	6161253	108896	1	8514	uc009vlv.2	0	ENSG00000069424	KCNAB2	potassium voltage-gated channel subfamily A regulatory beta subunit 2	uc001alq.2;uc001als.2;uc001alt.3;uc009vlt.2;uc009vlv.2;uc001alu.3;uc001alv.2;uc001alw.2;uc001alx.2	261734;261734;261734;261734;8514;8514;8514;8514;8514	0;0;0;0;0;-33674;-33674;-33674;-41949
chr1	6480701	6480949	249	*	Promoter (<=1kb)	1	6475294	6479979	4686	2	54626	uc001amx.3	-722	ENSG00000069812	HES2	hes family bHLH transcription factor 2	uc021ofo.1;uc001ams.3;uc001amt.3;uc001amu.3;uc001amw.3;uc001amx.3;uc001anj.1;uc009vma.1;uc010nzr.1;uc001ank.1;uc001anl.2;uc009vmb.2;uc001anm.2;uc001ann.1;uc031plb.1;uc001ano.1;uc001anp.2;uc001anq.2;uc001amy.3;uc001amz.3;uc031pla.1;uc001ana.3;uc001anb.3;uc001anc.3;uc001and.3;uc001ane.3;uc001anf.3;uc001ang.3;uc001anh.3;uc009vlz.3;uc001ani.1	100422975;11332;11332;11332;54626;54626;57449;57449;57449;57449;57449;57449;57449;57449;57449;57449;57449;57449;83715;83715;8718;8718;8718;8718;8718;8718;8718;8718;8718;8718;8718	9007;-34818;-26875;-26875;0;-722;50694;56769;64580;65065;69705;69705;70812;75807;76207;76535;99172;99172;-3899;-27154;42733;45306;45306;45306;45306;45306;45306;45306;45306;45306;45306
chr1	6673051	6673649	599	*	Promoter (<=1kb)	1	6673756	6684093	10338	1	148479	uc001aob.4	-107	ENSG00000116273	PHF13	PHD finger protein 13	uc001aob.4;uc009vmc.2;uc001anx.3;uc009vmd.2;uc001any.2;uc001aof.2;uc001aog.2;uc010nzu.1;uc001ant.3;uc001anu.3;uc021ofp.1;uc001aoc.3;uc001aod.3;uc001aoe.2;uc001anz.1;uc009vme.3;uc001aoa.3	148479;3104;3104;3104;3104;55735;55735;55735;80835;80835;80835;90326;90326;90326;9903;9903;9903	-107;32995;32988;32982;27689;0;0;0;57713;57713;42082;-11276;-11561;-11561;-10122;-13180;-10122
chr1	6732651	6732999	349	*	Intron (uc001aof.2/55735, intron 3 of 15)	1	6694228	6761966	67739	2	55735	uc001aof.2	28967	ENSG00000007923	DNAJC11	DnaJ heat shock protein family (Hsp40) member C11	uc001aob.4;uc001aof.2;uc001aog.2;uc010nzu.1;uc001aoc.3;uc001aod.3;uc001aoe.2	148479;55735;55735;55735;90326;90326;90326	58895;0;0;0;47726;47441;47441
chr1	8021301	8022149	849	*	Promoter (<=1kb)	1	8021714	8045342	23629	1	11315	uc001aou.4	0	ENSG00000116288	PARK7	Parkinsonism associated deglycase	uc001aoq.3;uc001aou.4;uc001aov.4;uc001aox.4;uc001aot.3;uc001aoz.3	10911;11315;11315;11315;3604;54206	-48007;0;0;0;-18076;64244
chr1	8064701	8065299	599	*	Distal Intergenic	1	8073487	8075752	2266	2	54206	uc001apa.1	10453	ENSG00000116285	ERRFI1	ERBB receptor feedback inhibitor 1	uc001aou.4;uc001aov.4;uc001aox.4;uc001aoz.3;uc001apa.1	11315;11315;11315;54206;54206	0;0;0;21094;10453
chr1	8257901	8258199	299	*	Distal Intergenic	1	8384390	8404227	19838	1	50651	uc001apb.3	-126191	ENSG00000162426	SLC45A1	solute carrier family 45 member 1	NA	NA	NA
chr1	8602151	8602449	299	*	Intron (uc001ape.3/473, intron 7 of 23)	1	8420172	8585844	165673	2	473	uc010nzx.1	-16307	ENSG00000142599	RERE	arginine-glutamic acid dipeptide repeats	uc001ape.3;uc001apf.3;uc010nzx.1;uc001aph.1	473;473;473;473	0;0;-16307;0
chr1	11741101	11741499	399	*	Promoter (<=1kb)	1	11734537	11741495	6959	2	10459	uc001asp.3	0	ENSG00000116670	MAD2L2	mitotic arrest deficient 2 like 2	uc001asp.3;uc001asq.4;uc009vnc.3;uc001asj.3;uc009vna.3;uc009vnb.1;uc001aso.3;uc001asr.1;uc001ask.3;uc010oaq.1;uc001asl.3;uc001asm.3;uc001asn.3;uc010oar.2;uc010oas.2	10459;10459;10459;26232;26232;26232;26270;374946;93611;93611;93611;93611;93611;93611;93611	0;0;0;-26213;-26213;-26700;16951;-10282;26669;26187;26187;26187;26187;26187;26187
chr1	11942901	11943199	299	*	Distal Intergenic	1	11917521	11918992	1472	2	4879	uc001atj.3	-23909	ENSG00000120937	NPPB	natriuretic peptide B	uc010oav.1;uc010oaw.1;uc010oax.1;uc010oay.1;uc010oaz.1;uc010oba.1;uc001ate.5;uc010oat.3;uc010oau.3;uc001ati.3;uc001atj.3;uc001atk.3;uc001atl.2	100379251;100379251;100379251;100379251;100379251;100379251;1185;1185;1185;4878;4879;90231;90231	42525;42525;42525;42525;42525;42525;76748;76748;76748;-35061;-23909;43286;43286
chr1	12065551	12065899	349	*	Exon (uc001atn.4/9927, exon 15 of 19)	1	12079299	12092106	12808	1	60672	uc001ato.2	-13400	ENSG00000116691	MIIP	migration and invasion inhibitory protein	uc001atm.3;uc010obb.2;uc001ato.2;uc001atn.4;uc009vni.3	5351;5351;60672;9927;9927	70827;70827;-13400;0;0
chr1	12508901	12509249	349	*	Intron (uc001atv.3/55187, intron 65 of 69)	1	12469884	12572098	102215	1	55187	uc010obd.2	39017	ENSG00000048707	VPS13D	vacuolar protein sorting 13 homolog D	uc001atv.3;uc001atw.3;uc001atx.3;uc009vnl.3;uc010obd.2	55187;55187;55187;55187;55187	0;0;0;0;0
chr1	15110551	15110999	449	*	Intron (uc009vog.1/23254, intron 1 of 7)	1	15250625	15394651	144027	1	23254	uc001avo.2	-139626	ENSG00000189337	KAZN	kazrin, periplakin interacting protein	uc009vog.1;uc001avm.4	23254;23254	0;0
chr1	15750651	15750999	349	*	Intron (uc001awh.2/79180, intron 1 of 3)	1	15764938	15773153	8216	1	11330	uc001awi.1	-13939	ENSG00000162438	CTRC	chymotrypsin C	uc001awi.1;uc001awj.1;uc001awb.2;uc001awd.1;uc010obl.1;uc001awe.1;uc001awg.3;uc001awk.3;uc001awh.2	11330;11330;114827;114827;114827;114827;114827;63036;79180	-13939;-13939;176883;82419;79072;78739;43454;-32224;0
chr1	16837351	16837499	149	*	Distal Intergenic	1	16793931	16819196	25266	2	114819	uc001ayt.2	-18155	ENSG00000290842	CROCCP3	CROCC pseudogene 3	uc021ogu.1;uc001ayt.2;uc001ays.2	100500876;114819;114819	-37910;-18155;-19772
chr1	16901101	16901349	249	*	Exon (uc001ayw.4/55672, exon 21 of 29)	1	16892903	16913756	20854	2	55672	uc001ayz.1	12407	ENSG00000219481	NBPF1	NBPF member 1	uc021ogu.1;uc001ayw.4;uc001ayz.1;uc009vot.1;uc010oce.1;uc001aza.5;uc001azb.1;uc001azc.2;uc010ocf.2;uc001aze.3;uc009vov.2;uc001azf.3	100500876;55672;55672;55672;55672;55672;55672;55672;84809;84809;84809;84809	25692;0;0;0;0;0;38403;38751;0;0;0;0
chr1	16908651	16909049	399	*	Exon (uc001ayw.4/55672, exon 14 of 29)	1	16892903	16913756	20854	2	55672	uc001ayz.1	4707	ENSG00000219481	NBPF1	NBPF member 1	uc021ogu.1;uc001ayw.4;uc001ayz.1;uc009vot.1;uc010oce.1;uc001aza.5;uc001azb.1;uc001azc.2;uc010ocf.2;uc001aze.3;uc009vov.2;uc001azf.3;uc001azg.1	100500876;55672;55672;55672;55672;55672;55672;55672;84809;84809;84809;84809;84809	33242;0;0;0;0;0;30703;31051;0;0;0;0;0
chr1	16910101	16910699	599	*	Exon (uc001ayw.4/55672, exon 13 of 29)	1	16892903	16913756	20854	2	55672	uc001ayz.1	3057	ENSG00000219481	NBPF1	NBPF member 1	uc021ogu.1;uc001ayw.4;uc001ayz.1;uc009vot.1;uc010oce.1;uc001aza.5;uc001azb.1;uc001azc.2;uc010ocf.2;uc001aze.3;uc009vov.2;uc001azf.3;uc001azg.1	100500876;55672;55672;55672;55672;55672;55672;55672;84809;84809;84809;84809;84809	34692;0;0;0;0;0;29053;29401;0;0;0;0;0
chr1	16912851	16913299	449	*	Promoter (<=1kb)	1	16892903	16913756	20854	2	55672	uc001ayz.1	457	ENSG00000219481	NBPF1	NBPF member 1	uc021ogu.1;uc001ayw.4;uc001ayz.1;uc009vot.1;uc010oce.1;uc001aza.5;uc001azb.1;uc001azc.2;uc010ocf.2;uc001aze.3;uc009vov.2;uc001azf.3;uc001azg.1	100500876;55672;55672;55672;55672;55672;55672;55672;84809;84809;84809;84809;84809	37442;0;0;0;0;0;26453;26801;0;0;0;0;0
chr1	16915601	16915799	199	*	Promoter (1-2kb)	1	16892903	16913756	20854	2	55672	uc009vot.1	-1845	ENSG00000219481	NBPF1	NBPF member 1	uc021ogu.1;uc001ayw.4;uc001ayz.1;uc009vot.1;uc010oce.1;uc001aza.5;uc001azb.1;uc001azc.2;uc010ocf.2;uc001aze.3;uc009vov.2;uc001azf.3;uc001azg.1	100500876;55672;55672;55672;55672;55672;55672;55672;84809;84809;84809;84809;84809	40192;0;0;0;0;0;23953;24301;0;0;0;0;0
chr1	16916251	16916749	499	*	Exon (uc001ayw.4/55672, exon 8 of 29)	1	16893674	16918808	25135	2	55672	uc010oce.1	2059	ENSG00000219481	NBPF1	NBPF member 1	uc021ogu.1;uc001ayw.4;uc001ayz.1;uc009vot.1;uc010oce.1;uc001aza.5;uc001azb.1;uc001azc.2;uc010ocf.2;uc001aze.3;uc009vov.2;uc001azf.3;uc001azg.1	100500876;55672;55672;55672;55672;55672;55672;55672;84809;84809;84809;84809;84809	40842;0;0;0;0;0;23003;23351;0;0;0;0;0
chr1	16919901	16920249	349	*	Promoter (1-2kb)	1	16893674	16918808	25135	2	55672	uc010oce.1	-1093	ENSG00000219481	NBPF1	NBPF member 1	uc021ogu.1;uc001ayw.4;uc001ayz.1;uc009vot.1;uc010oce.1;uc001aza.5;uc001azb.1;uc001azc.2;uc010ocf.2;uc001aze.3;uc009vov.2;uc001azf.3;uc001azg.1	100500876;55672;55672;55672;55672;55672;55672;55672;84809;84809;84809;84809;84809	44492;0;0;0;0;0;19503;19851;0;0;0;0;0
chr1	16922651	16922949	299	*	Intron (uc001ayw.4/55672, intron 2 of 28)	1	16893674	16918808	25135	2	55672	uc010oce.1	-3843	ENSG00000219481	NBPF1	NBPF member 1	uc021ogu.1;uc009vow.2;uc010ocg.1;uc010och.2;uc010oci.1;uc001azk.2;uc001ayw.4;uc001ayz.1;uc009vot.1;uc010oce.1;uc001aza.5;uc001azb.1;uc001azc.2;uc010ocf.2;uc001aze.3;uc009vov.2;uc001azf.3;uc001azg.1	100500876;11209;11209;11209;11209;11209;55672;55672;55672;55672;55672;55672;55672;84809;84809;84809;84809;84809	47242;0;0;0;-49915;-49915;0;0;0;0;0;16803;17151;0;0;0;0;0
chr1	16923551	16923899	349	*	Intron (uc001ayw.4/55672, intron 2 of 28)	1	16893674	16918808	25135	2	55672	uc010oce.1	-4743	ENSG00000219481	NBPF1	NBPF member 1	uc021ogu.1;uc009vow.2;uc010ocg.1;uc010och.2;uc010oci.1;uc001azk.2;uc001ayw.4;uc001ayz.1;uc009vot.1;uc010oce.1;uc001aza.5;uc001azb.1;uc001azc.2;uc010ocf.2;uc001aze.3;uc009vov.2;uc001azf.3;uc001azg.1	100500876;11209;11209;11209;11209;11209;55672;55672;55672;55672;55672;55672;55672;84809;84809;84809;84809;84809	48142;0;0;0;-48965;-48965;0;0;0;0;0;15853;16201;0;0;0;0;0
chr1	16926701	16927099	399	*	Exon (uc001aza.5/55672, exon 3 of 3)	1	16893674	16918808	25135	2	55672	uc010oce.1	-7893	ENSG00000219481	NBPF1	NBPF member 1	uc009vow.2;uc010ocg.1;uc010och.2;uc010oci.1;uc001azk.2;uc001azm.4;uc009vox.3;uc001ayw.4;uc001ayz.1;uc009vot.1;uc010oce.1;uc001aza.5;uc001azb.1;uc001azc.2;uc010ocf.2;uc001aze.3;uc009vov.2;uc001azf.3;uc001azg.1	11209;11209;11209;11209;11209;11209;11209;55672;55672;55672;55672;55672;55672;55672;84809;84809;84809;84809;84809	0;0;0;-45765;-45765;-46809;-46809;0;0;0;0;0;12653;13001;0;0;0;0;0
chr1	16940751	16941499	749	*	Promoter (<=1kb)	1	16931913	16940100	8188	2	55672	uc001azc.2	-651	ENSG00000219481	NBPF1	NBPF member 1	uc009vow.2;uc010ocg.1;uc010och.2;uc010oci.1;uc001azk.2;uc001azm.4;uc009vox.3;uc001ayw.4;uc001ayz.1;uc009vot.1;uc010oce.1;uc001aza.5;uc001azb.1;uc001azc.2;uc010ocf.2;uc001aze.3;uc009vov.2;uc001azf.3;uc001azg.1	11209;11209;11209;11209;11209;11209;11209;55672;55672;55672;55672;55672;55672;55672;84809;84809;84809;84809;84809	0;0;0;-31365;-31365;-32409;-32409;0;0;0;0;0;-999;-651;0;0;0;0;0
chr1	16945851	16946099	249	*	Exon (uc001azf.3/84809, exon 7 of 7)	1	16931913	16940100	8188	2	55672	uc001azc.2	-5751	ENSG00000219481	NBPF1	NBPF member 1	uc009vow.2;uc010ocg.1;uc010och.2;uc010oci.1;uc001azk.2;uc001azm.4;uc009vox.3;uc001ayw.4;uc001ayz.1;uc009vot.1;uc010oce.1;uc001aza.5;uc001azb.1;uc001azc.2;uc010ocf.2;uc001aze.3;uc009vov.2;uc001azf.3;uc001azg.1	11209;11209;11209;11209;11209;11209;11209;55672;55672;55672;55672;55672;55672;55672;84809;84809;84809;84809;84809	0;0;0;-26765;-26765;-27809;-27809;0;0;0;0;0;-6099;-5751;0;0;0;0;0
chr1	16946451	16946899	449	*	Exon (uc010ocf.2/84809, exon 3 of 4)	1	16944751	16952994	8244	2	84809	uc010ocf.2	6095	ENSG00000291072	CROCCP2	CROCC pseudogene 2	uc009vow.2;uc010ocg.1;uc010och.2;uc010oci.1;uc001azk.2;uc001azm.4;uc009vox.3;uc001ayw.4;uc001ayz.1;uc009vot.1;uc010oce.1;uc001aza.5;uc001azb.1;uc001azc.2;uc010ocf.2;uc001aze.3;uc009vov.2;uc001azf.3;uc001azg.1	11209;11209;11209;11209;11209;11209;11209;55672;55672;55672;55672;55672;55672;55672;84809;84809;84809;84809;84809	0;0;0;-25965;-25965;-27009;-27009;0;0;0;0;0;-6699;-6351;0;0;0;0;0
chr1	16952201	16952499	299	*	Promoter (<=1kb)	1	16944751	16952994	8244	2	84809	uc010ocf.2	495	ENSG00000291072	CROCCP2	CROCC pseudogene 2	uc009vow.2;uc010ocg.1;uc010och.2;uc010oci.1;uc001azk.2;uc001azm.4;uc009vox.3;uc001ayw.4;uc001ayz.1;uc009vot.1;uc010oce.1;uc001aza.5;uc001azb.1;uc001azc.2;uc010ocf.2;uc001aze.3;uc009vov.2;uc001azf.3;uc001azg.1	11209;11209;11209;11209;11209;11209;11209;55672;55672;55672;55672;55672;55672;55672;84809;84809;84809;84809;84809	0;0;0;-20365;-20365;-21409;-21409;0;0;0;0;0;-12449;-12101;0;0;0;0;0
chr1	16952701	16952849	149	*	Promoter (<=1kb)	1	16944751	16952994	8244	2	84809	uc010ocf.2	145	ENSG00000291072	CROCCP2	CROCC pseudogene 2	uc009vow.2;uc010ocg.1;uc010och.2;uc010oci.1;uc001azk.2;uc001azm.4;uc009vox.3;uc001ayw.4;uc001ayz.1;uc009vot.1;uc010oce.1;uc001aza.5;uc001azb.1;uc001azc.2;uc010ocf.2;uc001aze.3;uc009vov.2;uc001azf.3;uc001azg.1	11209;11209;11209;11209;11209;11209;11209;55672;55672;55672;55672;55672;55672;55672;84809;84809;84809;84809;84809	0;0;0;-20015;-20015;-21059;-21059;0;0;0;0;0;-12949;-12601;0;0;0;0;0
chr1	16960501	16960949	449	*	Promoter (<=1kb)	1	16944757	16959841	15085	2	84809	uc001azf.3	-660	ENSG00000291072	CROCCP2	CROCC pseudogene 2	uc021ogy.1;uc009vow.2;uc010ocg.1;uc010och.2;uc010oci.1;uc001azk.2;uc001azm.4;uc009vox.3;uc001ayw.4;uc001ayz.1;uc009vot.1;uc010oce.1;uc001aza.5;uc001azb.1;uc001azc.2;uc010ocf.2;uc001aze.3;uc009vov.2;uc001azf.3;uc001azg.1	100500876;11209;11209;11209;11209;11209;11209;11209;55672;55672;55672;55672;55672;55672;55672;84809;84809;84809;84809;84809	-46801;0;0;0;-11915;-11915;-12959;-12959;0;0;0;0;0;-20749;-20401;0;0;0;0;0
chr1	16962251	16962999	749	*	Intron (uc001azg.1/84809, intron 2 of 9)	1	16944757	16959841	15085	2	84809	uc001azf.3	-2410	ENSG00000291072	CROCCP2	CROCC pseudogene 2	uc021ogy.1;uc009vow.2;uc010ocg.1;uc010och.2;uc010oci.1;uc001azk.2;uc001azm.4;uc009vox.3;uc001ayw.4;uc001ayz.1;uc009vot.1;uc010oce.1;uc001aza.5;uc001azb.1;uc001azc.2;uc010ocf.2;uc001aze.3;uc009vov.2;uc001azf.3;uc001azg.1	100500876;11209;11209;11209;11209;11209;11209;11209;55672;55672;55672;55672;55672;55672;55672;84809;84809;84809;84809;84809	-44751;0;0;0;-9865;-9865;-10909;-10909;0;0;0;0;0;-22499;-22151;0;0;0;0;0
chr1	16970451	16972149	1699	*	Promoter (<=1kb)	1	16972069	16974587	2519	1	11209	uc009vow.2	0	NA	MST1P2	macrophage stimulating 1 pseudogene 2	uc021ogy.1;uc009vow.2;uc010ocg.1;uc010och.2;uc010oci.1;uc001azk.2;uc001azm.4;uc009vox.3;uc001azn.1;uc001ayw.4;uc001aza.5;uc001azb.1;uc001azc.2;uc010ocf.2;uc001aze.3;uc009vov.2;uc001azf.3;uc001azg.1	100500876;11209;11209;11209;11209;11209;11209;11209;284729;55672;55672;55672;55672;84809;84809;84809;84809;84809	-35601;0;0;0;-715;-715;-1759;-1759;0;0;0;-30699;-30351;0;0;0;0;0
chr1	16991951	16992199	249	*	Distal Intergenic	1	17007750	17007823	74	1	100500876	uc021ogy.1	-15551	ENSG00000263811	MIR3675	microRNA 3675	uc021ogy.1;uc009vow.2;uc010ocg.1;uc010och.2;uc010oci.1;uc001azk.2;uc001azm.4;uc009vox.3;uc001azn.1;uc010ocf.2;uc001aze.3;uc009vov.2;uc001azf.3;uc001azg.1	100500876;11209;11209;11209;11209;11209;11209;11209;284729;84809;84809;84809;84809;84809	-15551;0;0;0;19087;19087;18043;18043;0;0;0;0;0;0
chr1	16995551	16995999	449	*	Distal Intergenic	1	17007750	17007823	74	1	100500876	uc021ogy.1	-11751	ENSG00000263811	MIR3675	microRNA 3675	uc021ogy.1;uc009vow.2;uc010ocg.1;uc010och.2;uc010oci.1;uc001azk.2;uc001azm.4;uc009vox.3;uc001azn.1;uc010ocf.2;uc001aze.3;uc009vov.2;uc001azf.3;uc001azg.1	100500876;11209;11209;11209;11209;11209;11209;11209;284729;84809;84809;84809;84809;84809	-11751;0;0;0;22687;22687;21643;21643;0;0;0;0;0;0
chr1	16996801	16997049	249	*	Distal Intergenic	1	17007750	17007823	74	1	100500876	uc021ogy.1	-10701	ENSG00000263811	MIR3675	microRNA 3675	uc021ogy.1;uc009vow.2;uc010ocg.1;uc010och.2;uc010oci.1;uc001azk.2;uc001azm.4;uc009vox.3;uc001azn.1;uc010ocf.2;uc001aze.3;uc009vov.2;uc001azf.3;uc001azg.1	100500876;11209;11209;11209;11209;11209;11209;11209;284729;84809;84809;84809;84809;84809	-10701;0;0;0;23937;23937;22893;22893;0;0;0;0;0;0
chr1	17001351	17001899	549	*	Distal Intergenic	1	17007750	17007823	74	1	100500876	uc021ogy.1	-5851	ENSG00000263811	MIR3675	microRNA 3675	uc021ogy.1;uc009vow.2;uc010ocg.1;uc010och.2;uc010oci.1;uc001azk.2;uc001azm.4;uc009vox.3;uc001azn.1;uc010ocf.2;uc001aze.3;uc009vov.2;uc001azf.3;uc001azg.1	100500876;11209;11209;11209;11209;11209;11209;11209;284729;84809;84809;84809;84809;84809	-5851;0;0;0;28487;28487;27443;27443;0;0;0;0;0;0
chr1	17029551	17029799	249	*	Intron (uc001azn.1/284729, intron 5 of 10)	1	17017713	17046652	28940	2	284729	uc001azn.1	16853	NA	ESPNP	espin pseudogene	uc021ogy.1;uc001azn.1;uc009voy.1	100500876;284729;9696	21801;0;0
chr1	17037601	17037949	349	*	Intron (uc001azn.1/284729, intron 1 of 10)	1	17017713	17046652	28940	2	284729	uc001azn.1	8703	NA	ESPNP	espin pseudogene	uc021ogy.1;uc001azp.5;uc010ock.3;uc001azn.1;uc009voy.1	100500876;11223;11223;284729;9696	29851;0;0;0;0
chr1	17048351	17048699	349	*	Promoter (1-2kb)	1	17017713	17046652	28940	2	284729	uc001azn.1	-1699	NA	ESPNP	espin pseudogene	uc021ogy.1;uc001azp.5;uc010ock.3;uc001azn.1;uc009voy.1	100500876;11223;11223;284729;9696	40601;0;0;0;0
chr1	17053401	17054399	999	*	Exon (uc021oha.1/uc021oha.1, exon 1 of 1)	1	17017713	17046652	28940	2	284729	uc001azn.1	-6749	NA	ESPNP	espin pseudogene	uc021ogy.1;uc001azp.5;uc010ock.3;uc001azn.1;uc009voy.1	100500876;11223;11223;284729;9696	45651;0;0;0;0
chr1	17061251	17061749	499	*	Distal Intergenic	1	17066768	17267729	200962	1	9696	uc009voy.1	-5019	ENSG00000058453	CROCC	ciliary rootlet coiled-coil, rootletin	uc001azp.5;uc010ock.3;uc001azn.1;uc009voy.1	11223;11223;284729;9696	0;0;0;0
chr1	17080601	17081149	549	*	3' UTR	1	17081129	17086552	5424	2	11223	uc001azp.5	5403	ENSG00000186715	MST1L	macrophage stimulating 1 like (pseudogene)	uc001azp.5;uc010ock.3;uc001azn.1;uc009voy.1	11223;11223;284729;9696	0;0;0;0
chr1	17199451	17199649	199	*	Exon (uc021ohf.2/uc021ohf.2, exon 1 of 2)	1	17185444	17185516	73	2	100500876	uc021ohc.1	-13935	ENSG00000263811	MIR3675	microRNA 3675	uc021ohc.1;uc009voy.1;uc001azt.2;uc009voz.1	100500876;9696;9696;9696	-13935;0;-48796;-49509
chr1	17199751	17200699	949	*	Exon (uc021ohf.2/uc021ohf.2, exon 2 of 2)	1	17185444	17185516	73	2	100500876	uc021ohc.1	-14235	ENSG00000263811	MIR3675	microRNA 3675	uc021ohc.1;uc009voy.1;uc001azt.2;uc009voz.1	100500876;9696;9696;9696	-14235;0;-47746;-48459
chr1	17229651	17229899	249	*	Intron (uc009voy.1/9696, intron 1 of 8)	1	17248445	17299474	51030	1	9696	uc001azt.2	-18546	ENSG00000058453	CROCC	ciliary rootlet coiled-coil, rootletin	uc021ohc.1;uc009voy.1;uc001azt.2;uc009voz.1;uc001azu.2	100500876;9696;9696;9696;9696	-44135;0;-18546;-19259;-36490
chr1	19229001	19229449	449	*	Promoter (<=1kb)	1	19197924	19229293	31370	2	8659	uc001bbb.3	0	ENSG00000159423	ALDH4A1	aldehyde dehydrogenase 4 family member A1	uc021ohm.2;uc001bbd.2;uc001bba.1;uc010ocu.2;uc001bbb.3;uc001bbc.3;uc021ohl.1	100616120;126917;80834;8659;8659;8659;8659	-19232;0;-42846;-11616;0;0;0
chr1	19235451	19235849	399	*	Intron (uc001bbd.2/126917, intron 8 of 8)	1	19197924	19229293	31370	2	8659	uc021ohl.1	-6158	ENSG00000159423	ALDH4A1	aldehyde dehydrogenase 4 family member A1	uc021ohm.2;uc001bbd.2;uc001bba.1;uc010ocu.2;uc001bbb.3;uc001bbc.3;uc021ohl.1	100616120;126917;80834;8659;8659;8659;8659	-25682;0;-49296;-18066;0;0;0
chr1	19812051	19812399	349	*	Promoter (<=1kb)	1	19665267	19812066	146800	2	832	uc001bce.3	0	ENSG00000077549	CAPZB	capping actin protein of muscle Z-line subunit beta	uc010ocz.2;uc001bce.3;uc009vpk.3;uc021ohr.1	832;832;832;832	-850;0;0;0
chr1	19940001	19940199	199	*	Intron (uc001bch.2/440574, intron 1 of 4)	1	19934301	19935138	838	1	644068	uc021ohx.2	5700	NA	RPS14P3	ribosomal protein S14 pseudogene 3	uc009vpl.2;uc021ohw.1;uc001bch.2;uc001bci.2;uc021oht.1;uc021ohu.1;uc021ohv.1;uc001bcj.2;uc031plj.1;uc031plk.1;uc009vpm.2;uc001bck.3;uc021ohy.2;uc021ohz.1;uc031pll.1;uc021ohx.2	100532736;100532736;440574;440574;440574;440574;440574;4681;4681;4681;4681;4681;4681;4681;4681;644068	0;0;0;0;0;0;0;-29524;-29524;-29704;-30009;-30468;-31667;-32061;-33905;5700
chr1	20524051	20524299	249	*	Distal Intergenic	1	20512578	20519942	7365	1	127733	uc001bdb.3	11473	ENSG00000162543	UBXN10	UBX domain protein 10	uc001bdb.3;uc009vpq.1;uc009vpp.1	127733;391013;64600	11473;-22364;58228
chr1	21112351	21113149	799	*	Promoter (<=1kb)	1	21069171	21113124	43954	2	50809	uc001bdv.1	0	ENSG00000127483	HP1BP3	heterochromatin protein 1 binding protein 3	uc010odf.1;uc010odg.1;uc001bdv.1;uc001bdw.1;uc010odh.1;uc001bdy.1;uc001bea.2;uc001beb.3;uc010odi.2;uc009vpz.3;uc010odj.2;uc001bec.3;uc001bee.3;uc001bef.3	50809;50809;50809;50809;50809;50809;50809;50809;8672;8672;8672;8672;8672;8672	-20327;-10904;0;0;0;-5318;0;0;186443;264338;264338;324727;390232;390232
chr1	21958401	21958999	599	*	Intron (uc001bew.3/5909, intron 2 of 24)	1	21943799	21949011	5213	2	5909	uc001bez.1	-9390	ENSG00000076864	RAP1GAP	RAP1 GTPase activating protein	uc001bev.3;uc001bew.3;uc001bex.3;uc001bey.3;uc001bez.1;uc001bfa.3;uc001bfb.3;uc001bfc.3;uc009vqc.3;uc010odq.2	5909;5909;5909;5909;5909;84196;84196;84196;84196;84196	-11858;0;0;0;-9390;92613;150689;150689;150689;150689
chr1	22002401	22002749	349	*	Distal Intergenic	1	21922708	21995856	73149	2	5909	uc001bey.3	-6545	ENSG00000076864	RAP1GAP	RAP1 GTPase activating protein	uc001bew.3;uc001bex.3;uc001bey.3;uc001bfa.3;uc001bfb.3;uc001bfc.3;uc009vqc.3;uc010odq.2;uc001bfd.1;uc001bfe.1	5909;5909;5909;84196;84196;84196;84196;84196;84196;84196	0;0;0;48863;106939;106939;106939;106939;28359;106939
chr1	22231301	22231849	549	*	Intron (uc001bfj.3/3339, intron 1 of 96)	1	22213708	22222803	9096	2	3339	uc009vqe.1	-8498	ENSG00000142798	HSPG2	heparan sulfate proteoglycan 2	uc001bfj.3;uc009vqd.3;uc009vqe.1	3339;3339;3339	0;0;-8498
chr1	23851301	23851549	249	*	Intron (uc001bhe.2/1870, intron 1 of 6)	1	23832920	23857712	24793	2	1870	uc001bhe.2	6163	ENSG00000007968	E2F2	E2F transcription factor 2	uc001bhe.2;uc001bhh.4;uc010odz.1;uc001bha.2;uc010oea.1;uc001bhc.1	1870;3399;55616;55616;55616;55616	0;34736;-40624;-40551;-40551;-40244
chr1	24104301	24104649	349	*	Promoter (<=1kb)	1	24086872	24104787	17916	2	100506963	uc001bhp.2	138	ENSG00000236810	ELOA-AS1	ELOA antisense RNA 1	uc001bhp.2;uc001bht.3;uc009vqo.1;uc001bhv.1;uc001bhx.1;uc001bhz.1;uc009vqq.1;uc001bib.3;uc010oec.2;uc001bic.3;uc009vqs.1;uc021oii.1;uc001bhq.3;uc010oeb.2;uc001bho.3	100506963;11313;2582;2582;2582;2582;2582;3155;3155;3155;3155;3155;57095;57095;6924	0;-12997;21411;22385;0;0;0;47300;47300;60461;47300;39424;-227;-227;34445
chr1	24127201	24127449	249	*	Promoter (<=1kb)	1	24122089	24127294	5206	2	2582	uc001bhx.1	0	ENSG00000117308	GALE	UDP-galactose-4-epimerase	uc001bhp.2;uc001bht.3;uc001bie.3;uc009vqo.1;uc001bhv.1;uc001bhx.1;uc001bhz.1;uc009vqq.1;uc001bib.3;uc010oec.2;uc001bic.3;uc009vqs.1;uc021oii.1;uc001bhq.3;uc010oeb.2;uc001bho.3	100506963;11313;2517;2582;2582;2582;2582;2582;3155;3155;3155;3155;3155;57095;57095;6924	0;9555;67410;-1141;-167;0;0;0;24500;24500;37661;24500;16624;22325;22325;57345
chr1	24246601	24246899	299	*	Distal Intergenic	1	24200460	24239817	39358	2	1269	uc001bif.3	-6784	ENSG00000188822	CNR2	cannabinoid receptor 2	uc021oik.1;uc001bij.2;uc021oin.1;uc021oio.1;uc021oip.1;uc021oiq.1;uc021oir.1;uc021ois.1;uc001bif.3;uc001big.3	100616492;10772;10772;10772;10772;10772;10772;10772;1269;55629	-8661;60054;60054;60054;60054;60054;60054;60054;-6784;-39402
chr1	25559601	25559849	249	*	Promoter (<=1kb)	1	25556800	25559013	2214	2	25949	uc001bjv.1	-588	ENSG00000117614	SYF2	SYF2 pre-mRNA splicing factor	uc001bjt.1;uc001bju.1;uc010oeo.1;uc001bjv.1;uc001bjw.3;uc021oji.1;uc021ojj.1;uc010oep.2;uc001bjz.3;uc001bka.3;uc001bkb.3;uc001bkc.3;uc009vrm.3;uc009vrn.3;uc009vro.3;uc009vrp.3	25949;25949;25949;25949;57035;57035;57035;6007;6007;6007;6007;6007;6007;6007;6007;6007	-588;-588;-588;-588;0;0;0;0;0;0;0;0;0;0;0;0
chr1	25572951	25573599	649	*	Promoter (<=1kb)	1	25568740	25573985	5246	2	57035	uc001bjw.3	386	ENSG00000117616	RSRP1	arginine and serine rich protein 1	uc001bjt.1;uc001bju.1;uc010oeo.1;uc001bjv.1;uc001bjw.3;uc021oji.1;uc021ojj.1;uc010oep.2;uc001bjz.3;uc001bka.3;uc001bkb.3;uc001bkc.3;uc009vrm.3;uc009vrn.3;uc009vro.3;uc009vrp.3	25949;25949;25949;25949;57035;57035;57035;6007;6007;6007;6007;6007;6007;6007;6007;6007	-13938;-13938;-13938;-13938;0;0;0;0;0;0;0;0;0;0;0;0
chr1	25606151	25606599	449	*	Intron (uc010oep.2/6007, intron 1 of 6)	1	25598981	25656936	57956	1	6007	uc009vrp.3	7170	ENSG00000187010	RHD	Rh blood group D antigen	uc001bjt.1;uc001bju.1;uc010oeo.1;uc001bjv.1;uc001bjw.3;uc021oji.1;uc021ojj.1;uc010oep.2;uc001bjz.3;uc001bka.3;uc001bkb.3;uc001bkc.3;uc009vrm.3;uc009vrn.3;uc009vro.3;uc009vrp.3	25949;25949;25949;25949;57035;57035;57035;6007;6007;6007;6007;6007;6007;6007;6007;6007	-47138;-47138;-47138;-47138;0;0;0;0;0;0;0;0;0;0;0;0
chr1	25611551	25611949	399	*	Intron (uc010oep.2/6007, intron 2 of 6)	1	25598981	25656936	57956	1	6007	uc009vrp.3	12570	ENSG00000187010	RHD	Rh blood group D antigen	uc001bjw.3;uc021oji.1;uc021ojj.1;uc010oep.2;uc001bjz.3;uc001bka.3;uc001bkb.3;uc001bkc.3;uc009vrm.3;uc009vrn.3;uc009vro.3;uc009vrp.3	57035;57035;57035;6007;6007;6007;6007;6007;6007;6007;6007;6007	0;0;0;0;0;0;0;0;0;0;0;0
chr1	25649401	25649699	299	*	Intron (uc001bjz.3/6007, intron 9 of 9)	1	25568740	25664656	95917	2	57035	uc021ojj.1	14957	ENSG00000117616	RSRP1	arginine and serine rich protein 1	uc001bke.3;uc009vrr.3;uc009vrs.3;uc010oeq.2;uc021ojj.1;uc001bkf.3;uc001bkg.3;uc001bkh.3;uc001bki.3;uc031pln.1;uc031plo.1;uc001bkj.3;uc010oep.2;uc001bjz.3;uc001bka.3;uc001bkb.3;uc001bkc.3;uc009vrm.3;uc009vrn.3;uc009vro.3;uc009vrp.3	23585;23585;23585;23585;57035;6006;6006;6006;6006;6006;6006;6006;6007;6007;6007;6007;6007;6007;6007;6007;6007	-15090;-15090;-15090;-15090;0;0;0;0;0;0;0;0;0;0;0;0;0;0;0;0;0
chr1	25694701	25694999	299	*	Intron (uc001bkf.3/6006, intron 9 of 9)	1	25664789	25688852	24064	1	23585	uc010oeq.2	29912	ENSG00000183726	TMEM50A	transmembrane protein 50A	uc001bke.3;uc009vrr.3;uc009vrs.3;uc010oeq.2;uc021ojj.1;uc001bkf.3;uc001bkg.3;uc001bkh.3;uc001bki.3;uc031pln.1;uc031plo.1;uc001bkj.3;uc001bjz.3;uc001bka.3;uc001bkb.3;uc001bkc.3;uc009vrm.3;uc009vrn.3;uc009vro.3;uc009vrp.3	23585;23585;23585;23585;57035;6006;6006;6006;6006;6006;6006;6006;6007;6007;6007;6007;6007;6007;6007;6007	29912;29912;29912;29912;0;0;0;0;0;0;0;0;0;0;0;0;0;0;0;0
chr1	25739701	25740349	649	*	Intron (uc001bkf.3/6006, intron 1 of 9)	1	25688740	25747363	58624	2	6006	uc001bkf.3	7014	ENSG00000188672	RHCE	Rh blood group CcEe antigens	uc009vrt.2;uc001bkk.3;uc009vru.3;uc009vrv.3;uc001bkf.3;uc001bkg.3;uc001bkh.3;uc001bki.3;uc031pln.1;uc031plo.1;uc001bkj.3	55219;55219;55219;55219;6006;6006;6006;6006;6006;6006;6006	-17039;-17039;-17039;-17039;0;0;0;0;0;0;0
chr1	26181001	26181349	349	*	Intron (uc001bkw.1/79000, intron 1 of 2)	1	26160497	26185848	25352	2	79000	uc001bkw.1	4499	ENSG00000127423	AUNIP	aurora kinase A and ninein interacting protein	uc001bkx.3;uc001bky.3;uc010oev.2;uc001bkz.3;uc001bla.3;uc001blb.3;uc001blc.3;uc001bkq.4;uc001bkr.4;uc009vrz.3;uc010oet.2;uc001bks.4;uc001bkt.4;uc001bku.4;uc001bkv.4;uc021ojk.1;uc021ojl.1;uc010oeu.1;uc001bkw.1	164091;3925;3925;3925;3925;3925;3925;56181;56181;56181;56181;56181;56181;56181;56181;57190;57190;646471;79000	16395;37749;51644;51295;51644;51644;52019;34604;34604;34604;34604;34317;33682;31980;28878;54334;54334;-30904;0
chr1	26437551	26438149	599	*	Promoter (<=1kb)	1	26437656	26452039	14384	1	149420	uc010oew.2	0	ENSG00000175087	PDIK1L	PDLIM1 interacting kinase 1 like	uc010oew.2;uc001blj.4;uc009vsb.3;uc001blk.3;uc001bli.2	149420;149420;149420;79927;84676	0;-119;-119;-47362;-43426
chr1	26704951	26705249	299	*	Distal Intergenic	1	26688125	26699266	11142	2	257101	uc009vsj.1	-5685	ENSG00000176083	ZNF683	zinc finger protein 683	uc001bmg.1;uc001bmh.1;uc009vsj.1;uc001bmd.4;uc001bmf.3;uc001bmi.1;uc001bmj.3	257101;257101;257101;55057;55057;79727;79727	-5685;-5685;-5685;-24330;-39983;-32020;-32020
chr1	26946701	26947649	949	*	Distal Intergenic	1	26881033	26881084	52	1	100302190	uc021ojp.1	65668	ENSG00000238705	MIR1976	microRNA 1976	uc001bmr.1;uc010ofe.1;uc010off.1;uc001bms.1;uc009vsl.1	6195;6195;6195;6195;6195	90452;88882;77048;74358;74358
chr1	27019401	27019799	399	*	Distal Intergenic	1	27022522	27102198	79677	1	8289	uc001bmt.1	-2723	ENSG00000117713	ARID1A	AT-rich interaction domain 1A	uc001bmt.1;uc001bmu.1;uc001bmv.1;uc001bmw.1	8289;8289;8289;8289	0;0;0;-36072
chr1	27021751	27022599	849	*	Promoter (<=1kb)	1	27022522	27102198	79677	1	8289	uc001bmt.1	0	ENSG00000117713	ARID1A	AT-rich interaction domain 1A	uc001bmt.1;uc001bmu.1;uc001bmv.1;uc001bmw.1	8289;8289;8289;8289	0;0;0;-33272
chr1	27113401	27113899	499	*	Promoter (<=1kb)	1	27114454	27124894	10441	1	55650	uc001bmz.3	-555	ENSG00000060642	PIGV	phosphatidylinositol glycan anchor biosynthesis class V	uc001bmz.3;uc001bna.3;uc010ofg.2;uc001bmt.1;uc001bmu.1;uc001bmv.1;uc001bmw.1;uc001bmx.1;uc009vsm.1;uc009vsn.1;uc001bnb.3;uc010ofh.1	55650;55650;55650;8289;8289;8289;8289;8289;8289;8289;84243;84243	-555;-780;-780;0;0;0;57530;15791;14095;12581;-39302;-44610
chr1	27425651	27426299	649	*	3' UTR	1	27425300	27430513	5214	2	6548	uc001bnl.3	4214	ENSG00000090020	SLC9A1	solute carrier family 9 member A1	uc001bnl.3;uc001bnm.4;uc010ofk.3;uc001bnn.3	6548;6548;6548;6548	0;0;0;55322
chr1	27816651	27817249	599	*	Promoter (<=1kb)	1	27730734	27816678	85945	2	10163	uc001bof.2	0	ENSG00000158195	WASF2	WASP family member 2	uc001bof.2;uc010ofl.2;uc009vsy.3	10163;10163;27245	0;0;0
chr1	27869101	27869499	399	*	Intron (uc009vsy.3/27245, intron 6 of 6)	1	27730734	27816678	85945	2	10163	uc010ofl.2	-52423	ENSG00000158195	WASF2	WASP family member 2	uc009vsy.3;uc009vsz.1;uc001boh.1	27245;27245;27245	0;60644;60862
chr1	29210351	29210699	349	*	Distal Intergenic	1	29213603	29446558	232956	1	2035	uc001brg.2	-2904	ENSG00000159023	EPB41	erythrocyte membrane protein band 4.1	uc001brg.2;uc001brh.2;uc001bri.2;uc001brj.2;uc001brm.2;uc009vtk.2;uc001brk.3;uc001brl.2;uc001brf.1	2035;2035;2035;2035;2035;2035;2035;2035;4985	-2904;-2904;-2904;-2904;-2904;-30389;-30389;-30389;71697
chr1	29211401	29211799	399	*	Promoter (1-2kb)	1	29213603	29446558	232956	1	2035	uc001brg.2	-1804	ENSG00000159023	EPB41	erythrocyte membrane protein band 4.1	uc001brg.2;uc001brh.2;uc001bri.2;uc001brj.2;uc001brm.2;uc009vtk.2;uc001brk.3;uc001brl.2;uc001brf.1	2035;2035;2035;2035;2035;2035;2035;2035;4985	-1804;-1804;-1804;-1804;-1804;-29289;-29289;-29289;72747
chr1	29483401	29483799	399	*	Intron (uc001bro.3/6429, intron 3 of 5)	1	29474250	29508637	34388	2	6429	uc001bro.3	24838	ENSG00000116350	SRSF4	serine and arginine rich splicing factor 4	uc001brg.2;uc001brh.2;uc001bri.2;uc001brj.2;uc001brm.2;uc001brl.2;uc021okg.1;uc009vtl.2;uc009vtm.2;uc009vtn.2;uc021okh.1;uc001brn.2;uc001brp.1;uc001brq.1;uc001brt.1;uc010ofz.1;uc001bro.3;uc010ofy.2;uc009vtp.2	2035;2035;2035;2035;2035;2035;2035;2035;2035;2035;399474;399474;51102;51102;51102;51102;6429;6429;6429	269798;269798;269798;269798;269798;242313;169458;169441;169441;72992;-34388;-32980;73655;73655;73655;73655;0;0;0
chr1	29507401	29507999	599	*	Promoter (<=1kb)	1	29474250	29508637	34388	2	6429	uc001bro.3	638	ENSG00000116350	SRSF4	serine and arginine rich splicing factor 4	uc001brp.1;uc001brq.1;uc001brt.1;uc010ofz.1;uc001bro.3;uc010ofy.2;uc009vtp.2	51102;51102;51102;51102;6429;6429;6429	49455;49455;49455;49455;0;0;0
chr1	31241801	31242149	349	*	Distal Intergenic	1	31205315	31230683	25369	2	7805	uc001bsc.2	-11118	ENSG00000162511	LAPTM5	lysosomal protein transmembrane 5	uc001bsb.1;uc021okj.1;uc001brz.3;uc001bsc.2	100129196;100616164;4146;7805	50182;-29722;-45369;-11118
chr1	31904651	31904999	349	*	Intron (uc021okm.1/347735, intron 9 of 10)	1	31886660	31907527	20868	1	347735	uc010ogh.2	17991	ENSG00000168528	SERINC2	serine incorporator 2	uc021okm.1;uc010ogg.2;uc009vtw.1;uc001bst.3;uc001bsu.3;uc010ogh.2	347735;347735;347735;347735;347735;347735	0;0;18688;0;0;0
chr1	32292751	32293099	349	*	Distal Intergenic	1	32256031	32281580	25550	2	90853	uc001btv.3	-11171	ENSG00000134668	SPOCD1	SPOC domain containing 1	uc001bts.1;uc001btu.3;uc001btv.3;uc021oks.1;uc001btw.1	90853;90853;90853;90853;90853	-11171;-11171;-11171;-28379;-28519
chr1	32404001	32404449	449	*	Promoter (<=1kb)	1	32372022	32403988	31967	2	8073	uc001bty.2	-13	ENSG00000184007	PTP4A2	protein tyrosine phosphatase 4A2	uc001btx.2;uc010ogs.2;uc001bty.2	8073;8073;8073	-18742;-18742;-13
chr1	32599101	32599599	499	*	Intron (uc001bug.3/23633, intron 1 of 13)	1	32608580	32642168	33589	1	23633	uc010ogy.2	-8981	ENSG00000025800	KPNA6	karyopherin subunit alpha 6	uc001bui.3;uc001buj.3;uc001bug.3;uc001buh.3;uc010ogx.2;uc010ogy.2;uc010ogt.1;uc010ogu.1;uc001buf.4;uc010ogv.2;uc010ogw.2	200081;200081;23633;23633;23633;23633;55116;55116;55116;55116;55116	-45746;-46067;0;0;0;-8981;60598;60598;60598;60598;60598
chr1	33116951	33117149	199	*	Promoter (<=1kb)	1	33116959	33151812	34854	1	5928	uc010ohk.2	0	ENSG00000162521	RBBP4	RB binding protein 4, chromatin remodeling factor	uc001bvo.1;uc001bvp.3;uc001bvq.3;uc001bvr.3;uc001bvs.3;uc010ohj.2;uc010ohk.2;uc001bvk.3;uc001bvn.3;uc001bvt.2;uc010ohl.1	339487;339487;339487;5928;5928;5928;5928;653121;653121;81493;81493	-766;-766;-766;0;0;0;0;186293;112179;51212;51212
chr1	33117251	33117449	199	*	Promoter (<=1kb)	1	33116959	33151812	34854	1	5928	uc010ohk.2	292	ENSG00000162521	RBBP4	RB binding protein 4, chromatin remodeling factor	uc001bvo.1;uc001bvp.3;uc001bvq.3;uc001bvr.3;uc001bvs.3;uc010ohj.2;uc010ohk.2;uc001bvk.3;uc001bvn.3;uc001bvt.2;uc010ohl.1	339487;339487;339487;5928;5928;5928;5928;653121;653121;81493;81493	-1066;-1066;-1066;0;0;0;0;186593;112479;50912;50912
chr1	33168701	33168949	249	*	Promoter (<=1kb)	1	33145507	33168361	22855	2	81493	uc010ohl.1	-340	ENSG00000162520	SYNC	syncoilin, intermediate filament protein	uc001bvu.1;uc001bvr.3;uc001bvs.3;uc010ohj.2;uc010ohk.2;uc001bvt.2;uc010ohl.1	57648;5928;5928;5928;5928;81493;81493	0;0;0;0;0;-340;-340
chr1	33222851	33223249	399	*	Intron (uc001bvu.1/57648, intron 1 of 6)	1	33219687	33240571	20885	1	57648	uc010ohm.1	3164	ENSG00000162522	NHSL3	NHS like 3	uc001bvu.1;uc010ohm.1;uc001bvv.2;uc010ohn.1;uc001bvw.1;uc001bvx.1;uc001bvy.1	57648;57648;57648;57648;8565;8565;8565	0;0;-7986;-7986;24455;26107;60384
chr1	35128501	35128849	349	*	Distal Intergenic	1	35220648	35224113	3466	1	2709	uc001bxu.4	-91799	ENSG00000189280	GJB5	gap junction protein beta 5	NA	NA	NA
chr1	36621401	36621849	449	*	Promoter (<=1kb)	1	36602170	36621654	19485	2	27095	uc031plx.1	0	ENSG00000054116	TRAPPC3	trafficking protein particle complex subunit 3	uc001bzx.4;uc031pls.1;uc031plt.1;uc031plu.1;uc031plv.1;uc031plw.1;uc031plx.1;uc001bzz.3;uc001caa.3;uc001cab.3;uc001cac.3;uc001cad.3	27095;27095;27095;27095;27095;27095;27095;55700;55700;55700;55700;55700	-6286;-6286;-6286;-6286;-6286;-6286;0;0;0;0;-16216;-21221
chr1	36866651	36866899	249	*	Distal Intergenic	1	36859031	36863493	4463	2	84967	uc001cao.1	-3158	ENSG00000181817	LSM10	LSM10, U7 small nuclear RNA associated	uc001caq.3;uc021olk.1;uc001car.3;uc001cak.1;uc001cal.1;uc001cam.1;uc001can.1;uc001cao.1	127700;127700;127700;83931;83931;83931;83931;84967	49187;49187;49187;-15166;-15166;-15166;-39710;-3158
chr1	39281701	39282049	349	*	Distal Intergenic	1	39303869	39325495	21627	2	64121	uc001ccq.3	43446	ENSG00000116954	RRAGC	Ras related GTP binding C	uc021olq.1;uc001ccs.3;uc001ccq.3;uc010oim.2;uc001ccr.3	100527950;26292;64121;64121;64121	65249;57001;43446;43446;58117
chr1	39381101	39381599	499	*	3' UTR	1	39351479	39385009	33531	2	54933	uc010oin.1	3410	ENSG00000158315	RHBDL2	rhomboid like 2	uc021olq.1;uc001ccs.3;uc010oin.1;uc010oio.1;uc001ccu.1;uc001ccv.3;uc001ccr.3	100527950;26292;54933;54933;54933;54933;64121	-33803;-42051;0;0;0;0;-40935
chr1	40041101	40042599	1499	*	Promoter (<=1kb)	1	40026485	40042521	16037	2	8761	uc001cdl.2	0	ENSG00000090621	PABPC4	poly(A) binding protein cytoplasmic 4	uc010oiw.2;uc001cdp.3;uc001cdi.3;uc001cdo.1;uc001cdj.2;uc001cdk.3;uc001cdl.2;uc001cdm.2;uc010oiv.1	26508;26508;353500;677834;728448;728448;8761;8761;8761	56073;62749;83783;-7919;-49744;-15731;0;0;0
chr1	40223151	40223599	449	*	Exon (uc021oly.1/uc021oly.1, exon 1 of 1)	1	40235197	40237020	1824	2	64064	uc001ceb.1	13421	ENSG00000198754	OXCT2	3-oxoacid CoA-transferase 2	uc001cds.2;uc001cdt.2;uc001cdu.2;uc010oiy.2;uc001cdv.3;uc001cdw.3;uc001cdx.2;uc001ceb.1;uc001cdz.1;uc001cea.1	10450;10450;10450;10450;10450;10450;10450;64064;656;656	18634;18634;18634;18634;0;0;14974;13421;30934;30934
chr1	40502201	40502549	349	*	Distal Intergenic	1	40506255	40525833	19579	1	10487	uc010ojd.1	-3706	ENSG00000131236	CAP1	cyclase associated actin cytoskeleton regulatory protein 1	uc010ojd.1;uc001cey.4;uc001cez.4;uc001cfa.4;uc009vvz.3;uc010oje.2;uc010ojf.1;uc001cfb.2;uc009vwa.2;uc010ojg.1	10487;10487;10487;10487;10487;10487;5538;5538;5538;5538	-3706;-3706;-3706;-3706;-3706;-3706;55630;60593;60593;60593
chr1	41099651	41099899	249	*	Intron (uc001cfu.1/9783, intron 4 of 7)	1	41086352	41131324	44973	2	9783	uc001cfu.1	31425	ENSG00000117016	RIMS3	regulating synaptic membrane exocytosis 3	uc001cfu.1;uc001cfv.1	9783;9783	0;0
chr1	41707501	41707999	499	*	Promoter (<=1kb)	1	41492871	41707815	214945	2	22955	uc001cgq.3	0	ENSG00000010803	SCMH1	Scm polycomb group protein homolog 1	uc001cgq.3;uc001cgr.3;uc001cgs.3;uc001cgt.3	22955;22955;22955;22955	0;0;0;0
chr1	43282501	43282999	499	*	Promoter (<=1kb)	1	43282776	43305384	22609	1	114625	uc010ojw.1	0	ENSG00000164010	ERMAP	erythroblast membrane associated protein (Scianna blood group)	uc021omg.1;uc010ojw.1;uc001cic.1;uc001cid.1;uc001cie.1;uc001cif.1;uc001cib.2;uc001cig.3;uc009vwm.3;uc021omh.1;uc001cih.3;uc001chv.2;uc001chw.2;uc001chx.4;uc001chy.4;uc001cia.4	100129924;114625;114625;114625;114625;114625;374969;51058;51058;51058;51058;64175;64175;64175;64175;79078	28840;0;0;0;0;-12587;0;-29245;-29245;-29245;-31963;-49746;-49746;-49746;-49746;49585
chr1	43291001	43291249	249	*	Promoter (<=1kb)	1	43291249	43310660	19412	1	114625	uc001cie.1	0	ENSG00000164010	ERMAP	erythroblast membrane associated protein (Scianna blood group)	uc021omg.1;uc010ojw.1;uc001cic.1;uc001cid.1;uc001cie.1;uc001cif.1;uc001cib.2;uc001cig.3;uc009vwm.3;uc021omh.1;uc001cih.3;uc001cia.4	100129924;114625;114625;114625;114625;114625;374969;51058;51058;51058;51058;79078	37340;0;0;0;0;-4337;0;-20995;-20995;-20995;-23713;58085
chr1	43401951	43402449	499	*	Intron (uc001cik.2/6513, intron 2 of 9)	1	43424720	43449029	24310	1	440584	uc001cil.3	-22271	ENSG00000227533	SLC2A1-DT	SLC2A1 divergent transcript	uc001cil.3;uc001cik.2	440584;6513	0;0
chr1	43429351	43429699	349	*	Intron (uc001cil.3/440584, intron 1 of 3)	1	43391046	43424847	33802	2	6513	uc001cik.2	-4504	ENSG00000117394	SLC2A1	solute carrier family 2 member 1	uc001cil.3;uc001cik.2	440584;6513	0;0
chr1	43535301	43535549	249	*	Distal Intergenic	1	43613594	43622067	8474	1	440585	uc009vwo.3	-78045	ENSG00000186973	CFAP144	cilia and flagella associated protein 144	NA	NA	NA
chr1	44501601	44501999	399	*	Distal Intergenic	1	44466439	44497164	30726	2	6536	uc010okp.2	-4437	ENSG00000196517	SLC6A9	solute carrier family 6 member 9	uc009vxf.1;uc001clj.3;uc009vxc.3;uc009vxe.2;uc010okm.2;uc001cll.4;uc001clm.4;uc009vxd.4;uc010okn.3;uc001cln.4;uc010oko.3;uc010okp.2;uc001clg.3;uc001clh.3;uc010okl.2;uc001cli.3	128209;149473;149473;6536;6536;6536;6536;6536;6536;6536;6536;6536;8704;8704;8704;8704	-12031;44321;44082;-19373;-4437;-18589;-18589;-18589;-18589;-4437;-4437;-4437;56727;56727;55993;55424
chr1	44756101	44756499	399	*	Intron (uc010okv.2/79033, intron 4 of 6)	1	44686742	44818597	131856	2	79033	uc010okv.2	62098	ENSG00000117419	ERI3	ERI1 exoribonuclease family member 3	uc010okv.2;uc001clt.3;uc010okw.2	79033;79033;79033	0;0;0
chr1	44756601	44756799	199	*	Intron (uc010okv.2/79033, intron 4 of 6)	1	44686742	44818597	131856	2	79033	uc010okv.2	61798	ENSG00000117419	ERI3	ERI1 exoribonuclease family member 3	uc010okv.2;uc001clt.3;uc010okw.2	79033;79033;79033	0;0;0
chr1	45103551	45103999	449	*	Intron (uc001clv.1/55182, intron 8 of 14)	1	45098015	45117395	19381	1	55182	uc001cma.1	5536	ENSG00000187147	RNF220	ring finger protein 220	uc001cmf.2;uc001clv.1;uc001clw.1;uc010okx.1;uc010oky.1;uc010okz.2;uc001clx.2;uc001cma.1;uc001cmc.3;uc001cmd.3;uc009vxh.1;uc010ola.1	339541;55182;55182;55182;55182;55182;55182;55182;79639;79639;79639;79639	-36395;0;0;0;0;0;0;0;36100;36100;35751;21968
chr1	45196501	45196749	249	*	Distal Intergenic	1	45205490	45233438	27949	1	11004	uc001cmg.4	-8741	ENSG00000142945	KIF2C	kinesin family member 2C	uc001cmg.4;uc010olb.2;uc010olc.2;uc001cmh.4;uc001cmj.1;uc001cmf.2;uc001cmi.3;uc001cmk.1;uc009vxi.3;uc001cml.3	11004;11004;11004;11004;26811;339541;6202;94161;94162;94163	-8741;-8741;-15317;-15336;0;56107;0;-45415;-46765;-47313
chr1	45241351	45241799	449	*	Promoter (<=1kb)	1	45241537	45241610	74	1	26811	uc001cmj.1	0	ENSG00000264294	SNORD55	small nucleolar RNA, C/D box 55	uc001cmg.4;uc010olb.2;uc010olc.2;uc001cmh.4;uc001cmn.3;uc010old.1;uc010ole.1;uc001cmm.3;uc001cmj.1;uc001cmp.3;uc001cmi.3;uc021omv.1;uc010olf.2;uc010olg.2;uc001cmk.1;uc009vxi.3;uc001cml.3	11004;11004;11004;11004;1263;149478;149478;266675;26811;343521;6202;8643;8643;8643;94161;94162;94163	35861;35861;29285;29266;-24237;-32355;-32355;11627;0;31158;0;66817;66817;66817;-365;-1715;-2263
chr1	45478201	45478549	349	*	Promoter (<=1kb)	1	45478481	45480508	2028	1	7389	uc010olj.1	0	ENSG00000126088	UROD	uroporphyrinogen decarboxylase	uc001cnd.2;uc010oli.2;uc031pmi.1;uc031pmj.1;uc001cna.2;uc001cnb.2;uc010olj.1;uc001cmx.4;uc001cmy.4;uc009vxk.3;uc010olh.2;uc001cmt.3;uc001cmu.3;uc001cmw.4	57643;7389;7389;7389;7389;7389;7389;79654;79654;79654;79654;8891;8891;8891	193701;0;0;0;0;0;0;-6941;-3978;-1174;-1174;-25807;-25807;-25807
chr1	46768701	46769449	749	*	Promoter (<=1kb)	1	46744072	46769038	24967	2	10489	uc001cpn.3	0	ENSG00000132128	LRRC41	leucine rich repeat containing 41	uc001cpn.3;uc010omb.2;uc001cpo.1;uc001cpr.2;uc009vyf.2;uc010omc.2;uc031pmk.1;uc009vyg.2;uc031pml.1;uc001cps.2;uc001cpt.2;uc001cpp.3;uc001cpq.3;uc001cpl.2;uc009vye.2	10489;10489;10489;387338;387338;387338;387338;387338;387338;387338;387338;7388;7388;8438;8438	0;0;0;-36400;-36400;-36400;-36400;-37401;-37401;-38059;-38059;0;0;55334;55334
chr1	46988201	46988499	299	*	Distal Intergenic	1	46972668	46979886	7219	1	127343	uc001cpx.3	15533	ENSG00000197587	DMBX1	diencephalon/mesencephalon homeobox 1	uc021onb.1;uc001cpw.3;uc001cpx.3;uc001cpy.2;uc009vyh.1;uc001cqb.4;uc001cqc.4;uc009vyi.4;uc010omd.3;uc010ome.3;uc009vyj.3;uc001cqd.2	100507423;127343;127343;148930;148930;8569;8569;8569;8569;8569;8569;8569	-15869;15533;15533;27179;28388;81467;81467;81467;81467;81467;81467;81467
chr1	47646751	47647249	499	*	Promoter (1-2kb)	1	47644922	47646011	1090	1	100874253	uc031pmn.1	1829	ENSG00000224805	LINC00853	long intergenic non-protein coding RNA 853	uc031pmn.1;uc001cqw.3;uc009vyo.3;uc009vyp.3;uc001cqv.1;uc001crb.1;uc009vyq.2;uc001cqx.2;uc001cqy.2;uc001cqz.1;uc001cra.1	100874253;10158;284541;284541;284541;6491;6886;6886;6886;6886;6886	1829;8522;43644;43644;43644;0;42521;48194;50138;50643;50643
chr1	47697901	47698199	299	*	Promoter (<=1kb)	1	47689676	47697892	8217	2	6886	uc001cra.1	-9	ENSG00000162367	TAL1	TAL bHLH transcription factor 1, erythroid differentiation factor	uc001cqw.3;uc001crb.1;uc010omn.1;uc010omo.1;uc001crc.1;uc001crd.1;uc001cre.1;uc001crf.1;uc001crg.1;uc009vyq.2;uc001cqx.2;uc001cqy.2;uc001cqz.1;uc001cra.1	10158;6491;6491;6491;6491;6491;6491;6491;6491;6886;6886;6886;6886;6886	-42130;0;80629;80629;81620;81620;81620;51546;81620;-8131;-2458;-514;-9;-9
chr1	51086601	51086899	299	*	Intron (uc009vyw.1/11124, intron 7 of 15)	1	50906935	51078170	171236	2	11124	uc010onc.1	-8431	ENSG00000185104	FAF1	Fas associated factor 1	uc010onc.1;uc009vyw.1;uc001cse.1	11124;11124;11124	-8431;0;0
chr1	51442801	51443199	399	*	Distal Intergenic	1	51435642	51440309	4668	1	1031	uc001csg.3	7159	ENSG00000123080	CDKN2C	cyclin dependent kinase inhibitor 2C	uc001csf.3;uc001csg.3;uc009vyw.1;uc001cse.1	1031;1031;11124;11124	9193;7159;0;0
chr1	51443901	51444749	849	*	Distal Intergenic	1	51435642	51440309	4668	1	1031	uc001csg.3	8259	ENSG00000123080	CDKN2C	cyclin dependent kinase inhibitor 2C	uc001csf.3;uc001csg.3;uc009vyw.1;uc001cse.1	1031;1031;11124;11124	10293;8259;0;0
chr1	51984351	51985199	849	*	Promoter (<=1kb)	1	51819935	51984995	165061	2	2060	uc001csq.1	0	ENSG00000085832	EPS15	epidermal growth factor receptor pathway substrate 15	uc001csq.1;uc009vyz.1	2060;2060	0;0
chr1	51986051	51986549	499	*	Promoter (1-2kb)	1	51819935	51984995	165061	2	2060	uc009vyz.1	-1056	ENSG00000085832	EPS15	epidermal growth factor receptor pathway substrate 15	uc001csq.1;uc009vyz.1	2060;2060	0;0
chr1	54837351	54837749	399	*	Intron (uc001cxe.4/23648, intron 4 of 17)	1	54691104	54872068	180965	2	23648	uc001cxe.4	34319	ENSG00000157216	SSBP3	single stranded DNA binding protein 3	uc001cxe.4;uc001cxf.4;uc001cxg.4	23648;23648;23648	0;0;0
chr1	54862801	54862999	199	*	Intron (uc001cxe.4/23648, intron 4 of 17)	1	54691104	54872068	180965	2	23648	uc001cxe.4	9069	ENSG00000157216	SSBP3	single stranded DNA binding protein 3	uc001cxe.4;uc001cxf.4;uc001cxg.4	23648;23648;23648	0;0;0
chr1	59364801	59364999	199	*	3' UTR	1	59250823	59365384	114562	1	100131060	uc010oop.1	113978	NA	JUN-DT	JUN divergent transcript	uc001czf.2;uc010oop.1	100131060;100131060	0;0
chr1	61542701	61542949	249	*	Promoter (<=1kb)	1	61542946	61928460	385515	1	4774	uc001czy.3	0	ENSG00000162599	NFIA	nuclear factor I A	uc001czy.3;uc010oos.2;uc001czv.3;uc001czw.3	4774;4774;4774;4774	0;0;0;0
chr1	61582001	61582299	299	*	Intron (uc001czy.3/4774, intron 2 of 10)	1	61547980	61928460	380481	1	4774	uc001czw.3	34021	ENSG00000162599	NFIA	nuclear factor I A	uc001czy.3;uc010oos.2;uc001czv.3;uc001czw.3	4774;4774;4774;4774	0;0;0;0
chr1	68199701	68200049	349	*	Intron (uc001dea.2/55970, intron 2 of 3)	1	68150860	68154021	3162	1	1647	uc009wbd.2	48841	ENSG00000116717	GADD45A	growth arrest and DNA damage inducible alpha	uc001ddz.2;uc009wbb.2;uc009wbc.2;uc009wbd.2;uc001dea.2	1647;1647;1647;1647;55970	48841;48841;48841;48841;0
chr1	70005901	70006149	249	*	Distal Intergenic	1	70032868	70340687	307820	1	57554	uc001deo.1	-26719	ENSG00000033122	LRRC7	leucine rich repeat containing 7	uc001deo.1	57554	-26719
chr1	71217301	71217799	499	*	Intron (uc001dff.3/uc001dff.3, intron 5 of 6)	1	71512189	71532865	20677	1	100132618	uc001dfr.3	-294390	NA	ZRANB2-AS1	ZRANB2 antisense RNA 1	NA	NA	NA
chr1	84972301	84972499	199	*	Promoter (<=1kb)	1	84964006	84972262	8257	2	2787	uc001djw.4	-39	ENSG00000174021	GNG5	G protein subunit gamma 5	uc001dkc.3;uc001dka.2;uc001dkb.2;uc001djw.4;uc001djv.4	1486;1486;1486;2787;80135	67605;67664;67664;-39;27381
chr1	88252551	88252849	299	*	Distal Intergenic	1	87819210	87837338	18129	2	100505768	uc001dmk.3	-415213	ENSG00000227290	LINC01364	long intergenic non-protein coding RNA 1364	NA	NA	NA
chr1	90011251	90011399	149	*	Intron (uc001dnh.3/23507, intron 1 of 7)	1	90024270	90063420	39151	1	23507	uc001dnj.3	-12871	ENSG00000197147	LRRC8B	leucine rich repeat containing 8 VRAC subunit B	uc001dnh.3;uc001dni.3;uc001dnj.3	23507;23507;23507	0;0;-12871
chr1	94130201	94130649	449	*	Intron (uc001dpz.4/8412, intron 2 of 11)	1	94027343	94146926	119584	2	8412	uc001dpz.4	16277	ENSG00000137936	BCAR3	BCAR3 adaptor protein, NSP family member	uc001dpz.4;uc001dqa.4;uc001dqb.4	8412;8412;8412	0;0;0
chr1	94489701	94490049	349	*	Intron (uc001dqh.3/24, intron 31 of 49)	1	94475933	94484228	8296	2	24	uc009wdp.1	-5473	ENSG00000198691	ABCA4	ATP binding cassette subfamily A member 4	uc001dqh.3;uc001dqi.1;uc009wdp.1;uc010otn.1	24;24;24;24	0;-13216;-5473;96656
chr1	109076551	109076749	199	*	Distal Intergenic	1	109102971	109181949	78979	1	284611	uc010ouy.2	-26222	ENSG00000162636	EEIG2	EEIG family member 2	uc010ouy.2	284611	-26222
chr1	109643151	109643449	299	*	Promoter (<=1kb)	1	109642815	109643234	420	1	677766	uc001dwo.1	336	ENSG00000278249	SCARNA2	small Cajal body-specific RNA 2	uc001dwp.4;uc009wev.3;uc009wew.3;uc001dwn.3;uc009weu.3;uc009wex.2;uc009wey.3;uc010ovg.3;uc021orb.1;uc001dwo.1;uc001dwm.1	127003;127003;127003;56900;56900;57535;57535;57535;57535;677766;6884	11920;11920;13030;9748;9748;0;0;0;0;0;-24527
chr1	109677101	109677349	249	*	Intron (uc009wex.2/57535, intron 1 of 19)	1	109656585	109749403	92819	1	57535	uc021orb.1	20516	ENSG00000116299	ELAPOR1	endosome-lysosome associated apoptosis and autophagy regulator 1	uc001dwp.4;uc009wev.3;uc009wew.3;uc001dwn.3;uc009weu.3;uc009wex.2;uc009wey.3;uc010ovg.3;uc021orb.1;uc001dwo.1	127003;127003;127003;56900;56900;57535;57535;57535;57535;677766	-21732;-21732;-20622;43698;43698;0;0;0;0;0
chr1	109705001	109705249	249	*	Intron (uc009wex.2/57535, intron 2 of 19)	1	109729171	109749403	20233	1	57535	uc031pnl.1	-23922	ENSG00000116299	ELAPOR1	endosome-lysosome associated apoptosis and autophagy regulator 1	uc001dwp.4;uc009wev.3;uc009wew.3;uc009wex.2;uc009wey.3;uc010ovg.3;uc021orb.1;uc031pnl.1;uc001dwr.3;uc001dws.1;uc009wez.1	127003;127003;127003;57535;57535;57535;57535;57535;57535;57535;57535	-49632;-49632;-48522;0;0;0;0;-23922;-25352;-34847;-34847
chr1	109723751	109723999	249	*	Intron (uc009wex.2/57535, intron 6 of 19)	1	109729171	109749403	20233	1	57535	uc031pnl.1	-5172	ENSG00000116299	ELAPOR1	endosome-lysosome associated apoptosis and autophagy regulator 1	uc009wex.2;uc009wey.3;uc010ovg.3;uc021orb.1;uc031pnl.1;uc001dwr.3;uc001dws.1;uc009wez.1;uc021orc.1;uc001dwu.2	57535;57535;57535;57535;57535;57535;57535;57535;6301;6301	0;0;0;0;-5172;-6602;-16097;-16097;-32516;-32516
chr1	110309651	110309899	249	*	Distal Intergenic	1	110295308	110306644	11337	2	79574	uc009wfo.2	-3007	ENSG00000198758	EPS8L3	EPS8 signaling adaptor L3	uc001dyo.2;uc001dyp.2;uc010ovv.2;uc010ovu.1;uc001dyn.3;uc001dyq.2;uc001dyr.2;uc001dys.2;uc009wfm.2;uc009wfn.2;uc009wfo.2	2947;2947;2947;2949;2949;79574;79574;79574;79574;79574;79574	-25991;-25991;-26518;54787;54787;-3007;-3007;-3007;-3007;-3007;-3007
chr1	110361001	110361349	349	*	Distal Intergenic	1	110295308	110306644	11337	2	79574	uc009wfo.2	-54357	ENSG00000198758	EPS8L3	EPS8 signaling adaptor L3	NA	NA	NA
chr1	111746551	111746749	199	*	Promoter (<=1kb)	1	111728591	111747160	18570	2	79961	uc001eal.2	411	ENSG00000162777	DENND2D	DENN domain containing 2D	uc001eag.3;uc001eah.1;uc001eai.1;uc001eaj.1;uc001eam.3;uc001ean.3;uc001eao.3;uc001eak.2;uc001eal.2	10390;10390;10390;10390;1117;1117;1117;79961;79961	64302;64302;63718;63718;-23532;-23532;-25584;-3226;0
chr1	113243451	113243749	299	*	3' UTR	1	113243749	113249678	5930	2	389	uc001ecp.1	5929	ENSG00000155366	RHOC	ras homolog family member C	uc001ecu.3;uc001ecv.3;uc010owk.2;uc010owl.2;uc009wgl.1;uc001ecs.1;uc001ect.1;uc001ecp.1;uc001ecq.1;uc001ecr.1;uc009wgk.1;uc001ecl.2;uc001eck.3;uc001ecm.3;uc001ecn.3;uc009wgj.1;uc001ecj.1	284467;284467;284467;284467;333926;333926;333926;389;389;389;389;4343;4343;4343;4343;4343;829	-19440;-19440;-19440;-19440;11330;14164;14201;0;0;0;0;26403;26403;26403;26403;25981;81376
chr1	113436301	113436749	449	*	Distal Intergenic	1	113465972	113467295	1324	1	246182	uc001eda.1	-29223	NA	AKR7A2P1	AKR7A2 pseudogene 1	uc001eda.1;uc001ecx.3;uc001ecy.3;uc001ecz.3	246182;6566;6566;6566	-29223;61936;62226;61936
chr1	114922701	114923099	399	*	Distal Intergenic	1	114946948	114949722	2775	2	51592	uc001eey.1	26623	ENSG00000197323	TRIM33	tripartite motif containing 33	uc010owr.2;uc010ows.2;uc001eew.3;uc001eex.3;uc001eey.1	51592;51592;51592;51592;51592	47417;83079;130682;130682;26623
chr1	116951951	116952049	99	*	Intron (uc009whb.2/84852, intron 1 of 2)	1	116935487	116961244	25758	2	84852	uc009whb.2	9195	ENSG00000203865	ATP1A1-AS1	ATP1A1 antisense RNA 1	uc010owv.1;uc001egd.2;uc001ege.3;uc010oww.2;uc010owx.2;uc009whb.2;uc001egg.3;uc001egi.3;uc001egj.3;uc001egk.3	476;476;476;476;476;84852;84852;84852;84852;84852	36947;36156;36156;35462;25959;0;0;0;0;0
chr1	116958351	116958749	399	*	Intron (uc009whb.2/84852, intron 1 of 2)	1	116935487	116961244	25758	2	84852	uc009whb.2	2495	ENSG00000203865	ATP1A1-AS1	ATP1A1 antisense RNA 1	uc010owv.1;uc001egd.2;uc001ege.3;uc010oww.2;uc010owx.2;uc009whb.2;uc001egg.3;uc001egi.3;uc001egj.3;uc001egk.3	476;476;476;476;476;84852;84852;84852;84852;84852	43347;42556;42556;41862;32359;0;0;0;0;0
chr1	117046551	117046899	349	*	Distal Intergenic	1	117061853	117087226	25374	2	965	uc001ego.1	40327	ENSG00000116815	CD58	CD58 molecule	uc001egm.3;uc001egn.3;uc010owy.2;uc001ego.1;uc001egp.4	965;965;965;965;965	66816;66816;66816;40327;66816
chr1	120604151	120604599	449	*	Intron (uc001eik.3/4853, intron 1 of 33)	1	120454176	120612317	158142	2	4853	uc001eik.3	7718	ENSG00000134250	NOTCH2	notch receptor 2	uc001eik.3;uc001eil.3;uc021osy.1;uc001eim.4	4853;4853;4853;4853	0;0;-9823;0
chr1	120609551	120609699	149	*	Intron (uc001eik.3/4853, intron 1 of 33)	1	120454176	120612317	158142	2	4853	uc001eik.3	2618	ENSG00000134250	NOTCH2	notch receptor 2	uc001eik.3;uc001eil.3;uc021osy.1;uc001eim.4	4853;4853;4853;4853	0;0;-15223;0
chr1	120620551	120620699	149	*	Distal Intergenic	1	120492743	120612317	119575	2	4853	uc001eim.4	-8234	ENSG00000134250	NOTCH2	notch receptor 2	uc001eik.3;uc001eil.3;uc021osy.1;uc001eim.4	4853;4853;4853;4853	0;0;-26223;0
chr1	120627901	120628399	499	*	Distal Intergenic	1	120492743	120612317	119575	2	4853	uc001eim.4	-15584	ENSG00000134250	NOTCH2	notch receptor 2	uc001eik.3;uc001eil.3;uc021osy.1;uc001eim.4	4853;4853;4853;4853	0;0;-33573;0
chr1	121136551	121136849	299	*	Distal Intergenic	1	121107152	121129827	22676	1	100996712	uc031pnu.1	29399	NA	SRGAP2D	SLIT-ROBO Rho GTPase activating protein 2D (pseudogene)	uc031pnu.1	100996712	29399
chr1	121140001	121140899	899	*	Distal Intergenic	1	121107152	121129827	22676	1	100996712	uc031pnu.1	32849	NA	SRGAP2D	SLIT-ROBO Rho GTPase activating protein 2D (pseudogene)	uc031pnu.1	100996712	32849
chr1	121389251	121389549	299	*	Distal Intergenic	1	121306424	121313686	7263	1	647121	uc009wht.1	82827	ENSG00000291141	EMBP1	embigin pseudogene 1	NA	NA	NA
chr1	121397501	121398249	749	*	Distal Intergenic	1	121306424	121313686	7263	1	647121	uc009wht.1	91077	ENSG00000291141	EMBP1	embigin pseudogene 1	NA	NA	NA
chr1	121404401	121404599	199	*	Distal Intergenic	1	121306424	121313686	7263	1	647121	uc009wht.1	97977	ENSG00000291141	EMBP1	embigin pseudogene 1	NA	NA	NA
chr1	121424751	121425099	349	*	Distal Intergenic	1	121306424	121313686	7263	1	647121	uc009wht.1	118327	ENSG00000291141	EMBP1	embigin pseudogene 1	NA	NA	NA
chr1	121445901	121446449	549	*	Distal Intergenic	1	121306424	121313686	7263	1	647121	uc009wht.1	139477	ENSG00000291141	EMBP1	embigin pseudogene 1	NA	NA	NA
chr1	121448651	121449199	549	*	Distal Intergenic	1	121306424	121313686	7263	1	647121	uc009wht.1	142227	ENSG00000291141	EMBP1	embigin pseudogene 1	NA	NA	NA
chr1	121472901	121473249	349	*	Distal Intergenic	1	121306424	121313686	7263	1	647121	uc009wht.1	166477	ENSG00000291141	EMBP1	embigin pseudogene 1	NA	NA	NA
chr1	142543151	142543549	399	*	Distal Intergenic	1	142697421	142713605	16185	2	100874392	uc031pnv.1	170056	NA	ANKRD20A12P	ankyrin repeat domain 20 family member A12, pseudogene	NA	NA	NA
chr1	142559101	142559399	299	*	Distal Intergenic	1	142697421	142713605	16185	2	100874392	uc031pnv.1	154206	NA	ANKRD20A12P	ankyrin repeat domain 20 family member A12, pseudogene	NA	NA	NA
chr1	142563351	142563549	199	*	Distal Intergenic	1	142697421	142713605	16185	2	100874392	uc031pnv.1	150056	NA	ANKRD20A12P	ankyrin repeat domain 20 family member A12, pseudogene	NA	NA	NA
chr1	142584951	142585149	199	*	Distal Intergenic	1	142697421	142713605	16185	2	100874392	uc031pnv.1	128456	NA	ANKRD20A12P	ankyrin repeat domain 20 family member A12, pseudogene	NA	NA	NA
chr1	142585801	142585999	199	*	Distal Intergenic	1	142697421	142713605	16185	2	100874392	uc031pnv.1	127606	NA	ANKRD20A12P	ankyrin repeat domain 20 family member A12, pseudogene	NA	NA	NA
chr1	142668151	142668249	99	*	Intron (uc001eiw.1/uc001eiw.1, intron 1 of 7)	1	142697421	142713605	16185	2	100874392	uc031pnv.1	45356	NA	ANKRD20A12P	ankyrin repeat domain 20 family member A12, pseudogene	uc031pnv.1	100874392	45356
chr1	142719251	142719499	249	*	Intron (uc001eiw.1/uc001eiw.1, intron 1 of 7)	1	142697421	142713605	16185	2	100874392	uc031pnv.1	-5646	NA	ANKRD20A12P	ankyrin repeat domain 20 family member A12, pseudogene	uc031pnv.1	100874392	-5646
chr1	142784151	142784799	649	*	Intron (uc001eiw.1/uc001eiw.1, intron 1 of 7)	1	142697421	142713605	16185	2	100874392	uc031pnv.1	-70546	NA	ANKRD20A12P	ankyrin repeat domain 20 family member A12, pseudogene	NA	NA	NA
chr1	142786251	142786599	349	*	Intron (uc001eiw.1/uc001eiw.1, intron 1 of 7)	1	142697421	142713605	16185	2	100874392	uc031pnv.1	-72646	NA	ANKRD20A12P	ankyrin repeat domain 20 family member A12, pseudogene	NA	NA	NA
chr1	142787151	142787549	399	*	Intron (uc001eiw.1/uc001eiw.1, intron 1 of 7)	1	142697421	142713605	16185	2	100874392	uc031pnv.1	-73546	NA	ANKRD20A12P	ankyrin repeat domain 20 family member A12, pseudogene	NA	NA	NA
chr1	142789851	142790499	649	*	Intron (uc001eiw.1/uc001eiw.1, intron 1 of 7)	1	142697421	142713605	16185	2	100874392	uc031pnv.1	-76246	NA	ANKRD20A12P	ankyrin repeat domain 20 family member A12, pseudogene	NA	NA	NA
chr1	142792651	142792999	349	*	Intron (uc001eiw.1/uc001eiw.1, intron 1 of 7)	1	142697421	142713605	16185	2	100874392	uc031pnv.1	-79046	NA	ANKRD20A12P	ankyrin repeat domain 20 family member A12, pseudogene	NA	NA	NA
chr1	142805101	142806199	1099	*	Exon (uc001ejb.3/uc001ejb.3, exon 3 of 4)	1	142697421	142713605	16185	2	100874392	uc031pnv.1	-91496	NA	ANKRD20A12P	ankyrin repeat domain 20 family member A12, pseudogene	NA	NA	NA
chr1	142814951	142815099	149	*	Intron (uc001eiw.1/uc001eiw.1, intron 1 of 7)	1	142697421	142713605	16185	2	100874392	uc031pnv.1	-101346	NA	ANKRD20A12P	ankyrin repeat domain 20 family member A12, pseudogene	NA	NA	NA
chr1	142837701	142837799	99	*	Intron (uc001eiw.1/uc001eiw.1, intron 1 of 7)	1	142697421	142713605	16185	2	100874392	uc031pnv.1	-124096	NA	ANKRD20A12P	ankyrin repeat domain 20 family member A12, pseudogene	NA	NA	NA
chr1	142895451	142895799	349	*	Intron (uc001eiw.1/uc001eiw.1, intron 1 of 7)	1	142697421	142713605	16185	2	100874392	uc031pnv.1	-181846	NA	ANKRD20A12P	ankyrin repeat domain 20 family member A12, pseudogene	NA	NA	NA
chr1	142902101	142902399	299	*	Intron (uc001eiw.1/uc001eiw.1, intron 1 of 7)	1	142697421	142713605	16185	2	100874392	uc031pnv.1	-188496	NA	ANKRD20A12P	ankyrin repeat domain 20 family member A12, pseudogene	NA	NA	NA
chr1	142908951	142909249	299	*	Intron (uc001eiw.1/uc001eiw.1, intron 1 of 7)	1	142697421	142713605	16185	2	100874392	uc031pnv.1	-195346	NA	ANKRD20A12P	ankyrin repeat domain 20 family member A12, pseudogene	NA	NA	NA
chr1	142910551	142911199	649	*	Intron (uc001eiw.1/uc001eiw.1, intron 1 of 7)	1	142697421	142713605	16185	2	100874392	uc031pnv.1	-196946	NA	ANKRD20A12P	ankyrin repeat domain 20 family member A12, pseudogene	NA	NA	NA
chr1	142912501	142912999	499	*	Intron (uc001eiw.1/uc001eiw.1, intron 1 of 7)	1	142697421	142713605	16185	2	100874392	uc031pnv.1	-198896	NA	ANKRD20A12P	ankyrin repeat domain 20 family member A12, pseudogene	NA	NA	NA
chr1	142953251	142953749	499	*	Intron (uc001eiw.1/uc001eiw.1, intron 1 of 7)	1	142697421	142713605	16185	2	100874392	uc031pnv.1	-239646	NA	ANKRD20A12P	ankyrin repeat domain 20 family member A12, pseudogene	NA	NA	NA
chr1	142955701	142955999	299	*	Intron (uc001eiw.1/uc001eiw.1, intron 1 of 7)	1	142697421	142713605	16185	2	100874392	uc031pnv.1	-242096	NA	ANKRD20A12P	ankyrin repeat domain 20 family member A12, pseudogene	NA	NA	NA
chr1	142959851	142960349	499	*	Intron (uc001eiw.1/uc001eiw.1, intron 1 of 7)	1	142697421	142713605	16185	2	100874392	uc031pnv.1	-246246	NA	ANKRD20A12P	ankyrin repeat domain 20 family member A12, pseudogene	NA	NA	NA
chr1	143237451	143237899	449	*	Intron (uc001eiw.1/uc001eiw.1, intron 6 of 7)	1	143687130	143705973	18844	1	100130000	uc009whw.2	-449231	NA	NA	NA	NA	NA	NA
chr1	143255201	143255749	549	*	Exon (uc001eiw.1/uc001eiw.1, exon 8 of 8)	1	143687130	143705973	18844	1	100130000	uc009whw.2	-431381	NA	NA	NA	NA	NA	NA
chr1	143261201	143261649	449	*	Distal Intergenic	1	143687130	143705973	18844	1	100130000	uc009whw.2	-425481	NA	NA	NA	NA	NA	NA
chr1	143279901	143279999	99	*	Distal Intergenic	1	143687130	143705973	18844	1	100130000	uc009whw.2	-407131	NA	NA	NA	NA	NA	NA
chr1	143366551	143366799	249	*	Distal Intergenic	1	143687130	143705973	18844	1	100130000	uc009whw.2	-320331	NA	NA	NA	NA	NA	NA
chr1	143387151	143387249	99	*	Distal Intergenic	1	143687130	143705973	18844	1	100130000	uc009whw.2	-299881	NA	NA	NA	NA	NA	NA
chr1	143390201	143390349	149	*	Distal Intergenic	1	143687130	143705973	18844	1	100130000	uc009whw.2	-296781	NA	NA	NA	NA	NA	NA
chr1	143398051	143398299	249	*	Distal Intergenic	1	143687130	143705973	18844	1	100130000	uc009whw.2	-288831	NA	NA	NA	NA	NA	NA
chr1	143409451	143409799	349	*	Distal Intergenic	1	143687130	143705973	18844	1	100130000	uc009whw.2	-277331	NA	NA	NA	NA	NA	NA
chr1	143419151	143419549	399	*	Exon (uc021ote.1/uc021ote.1, exon 1 of 1)	1	143687130	143705973	18844	1	100130000	uc009whw.2	-267581	NA	NA	NA	NA	NA	NA
chr1	143537751	143537949	199	*	Distal Intergenic	1	143687130	143705973	18844	1	100130000	uc009whw.2	-149181	NA	NA	NA	NA	NA	NA
chr1	143913801	143913999	199	*	Promoter (<=1kb)	1	143896452	143913143	16692	2	728833	uc010evy.1	-658	ENSG00000215784	FAM72D	family with sequence similarity 72 member D	uc002qvn.1;uc010evy.1	728833;728833	-658;-658
chr1	143942301	143942649	349	*	Intron (uc010oxm.1/uc010oxm.1, intron 1 of 3)	1	143896452	143913143	16692	2	728833	uc010evy.1	-29158	ENSG00000215784	FAM72D	family with sequence similarity 72 member D	uc002qvn.1;uc010evy.1	728833;728833	-29158;-29158
chr1	144006851	144007199	349	*	Intron (uc010oxm.1/uc010oxm.1, intron 1 of 3)	1	143896452	143913143	16692	2	728833	uc010evy.1	-93708	ENSG00000215784	FAM72D	family with sequence similarity 72 member D	NA	NA	NA
chr1	144012801	144013449	649	*	Intron (uc010oxm.1/uc010oxm.1, intron 1 of 3)	1	143896452	143913143	16692	2	728833	uc010evy.1	-99658	ENSG00000215784	FAM72D	family with sequence similarity 72 member D	NA	NA	NA
chr1	144530101	144530599	499	*	Intron (uc010oxn.2/728841, intron 15 of 18)	1	144480746	144521969	41224	2	728875	uc001ekz.4	-8132	NA	NA	NA	uc021ott.2;uc021otj.2;uc021ots.1;uc021otv.1;uc010oxo.2;uc010oxn.2;uc021oth.2;uc021oto.2;uc021otr.2;uc001ekk.2;uc010oyd.2;uc001ela.4;uc001eky.4;uc001ekz.4	100288142;100288142;100288142;100288142;400818;728841;728841;728841;728841;728841;728841;728875;728875;728875	0;0;0;0;0;0;0;0;0;0;0;-9092;-9092;-8132
chr1	144530901	144531399	499	*	Intron (uc010oxn.2/728841, intron 15 of 18)	1	144480746	144521969	41224	2	728875	uc001ekz.4	-8932	NA	NA	NA	uc021ott.2;uc021otj.2;uc021ots.1;uc021otv.1;uc010oxo.2;uc010oxn.2;uc021oth.2;uc021oto.2;uc021otr.2;uc001ekk.2;uc010oyd.2;uc001ela.4;uc001eky.4;uc001ekz.4	100288142;100288142;100288142;100288142;400818;728841;728841;728841;728841;728841;728841;728875;728875;728875	0;0;0;0;0;0;0;0;0;0;0;-9892;-9892;-8932
chr1	144539751	144539899	149	*	Intron (uc010oxn.2/728841, intron 15 of 18)	1	144480746	144521969	41224	2	728875	uc001ekz.4	-17782	NA	NA	NA	uc021ott.2;uc021otj.2;uc021ots.1;uc021otv.1;uc010oxo.2;uc010oxn.2;uc021oth.2;uc021oto.2;uc021otr.2;uc001ekk.2;uc010oyd.2;uc001ela.4;uc001eky.4;uc001ekz.4	100288142;100288142;100288142;100288142;400818;728841;728841;728841;728841;728841;728841;728875;728875;728875	0;0;0;0;0;0;0;0;0;0;0;-18742;-18742;-17782
chr1	144826351	144826449	99	*	Intron (uc010oxn.2/728841, intron 16 of 18)	1	144811947	144827928	15982	1	400818	uc021ouf.1	14404	ENSG00000269713	NBPF9	NBPF member 9	uc021ott.2;uc021otj.2;uc021ots.1;uc021otv.1;uc010oxo.2;uc010oye.3;uc009wig.2;uc031pnx.1;uc009wii.1;uc021ouf.1;uc001elk.2;uc001ell.2;uc001elm.4;uc001eln.4;uc010oxn.2;uc021oth.2;uc021oto.2;uc021otr.2;uc001ekk.2;uc010oyd.2;uc001eli.4;uc031pny.1;uc001elo.3;uc001elv.4;uc001elw.4;uc021ouh.1;uc001elx.4;uc001ema.3	100288142;100288142;100288142;100288142;400818;400818;400818;400818;400818;400818;653513;653513;653513;653513;728841;728841;728841;728841;728841;728841;728841;728841;9659;9659;9659;9659;9659;9659	0;0;0;0;0;0;0;0;211255;0;0;0;0;0;0;0;0;0;0;0;0;0;0;0;0;0;0;41723
chr1	144852351	144852799	449	*	3' UTR	1	144862708	144868172	5465	2	9659	uc001ema.3	15373	ENSG00000178104	PDE4DIP	phosphodiesterase 4D interacting protein	uc021ott.2;uc021otj.2;uc021ots.1;uc021otv.1;uc010oxo.2;uc010oye.3;uc009wig.2;uc031pnx.1;uc009wii.1;uc021ouf.1;uc001elk.2;uc001ell.2;uc001elm.4;uc001eln.4;uc010oxn.2;uc021oth.2;uc021oto.2;uc021otr.2;uc001ekk.2;uc010oyd.2;uc001eli.4;uc031pny.1;uc001elo.3;uc001elv.4;uc001elw.4;uc021ouh.1;uc001elx.4;uc001ema.3;uc001emb.1;uc001emc.2;uc001emd.2;uc001eme.1	100288142;100288142;100288142;100288142;400818;400818;400818;400818;400818;400818;653513;653513;653513;653513;728841;728841;728841;728841;728841;728841;728841;728841;9659;9659;9659;9659;9659;9659;9659;9659;9659;9659	0;0;0;0;0;0;0;0;237255;0;0;0;0;0;0;0;0;0;0;0;0;0;0;0;0;0;0;15373;79233;0;0;69248
chr1	144982751	144983349	599	*	Intron (uc021ott.2/100288142, intron 53 of 131)	1	144676437	144995033	318597	2	653513	uc001elk.2	11684	NA	LOC653513	phosphodiesterase 4D interacting protein-like	uc021ott.2;uc021ots.1;uc010oye.3;uc031pnx.1;uc001elk.2;uc001ell.2;uc001elm.4;uc001eln.4;uc001elo.3;uc001elw.4;uc021ouh.1;uc001elx.4;uc001emc.2;uc001emd.2;uc001emg.2;uc021oui.1;uc021ouj.1;uc001emh.3	100288142;100288142;400818;400818;653513;653513;653513;653513;9659;9659;9659;9659;9659;9659;9659;9659;9659;9659	0;0;0;0;0;0;0;0;0;0;0;0;0;0;0;0;0;0
chr1	144990301	144990499	199	*	Intron (uc021ott.2/100288142, intron 53 of 131)	1	144676437	144995033	318597	2	653513	uc001elk.2	4534	NA	LOC653513	phosphodiesterase 4D interacting protein-like	uc021ott.2;uc021ots.1;uc010oye.3;uc031pnx.1;uc001elk.2;uc001ell.2;uc001elm.4;uc001eln.4;uc001elo.3;uc001elw.4;uc021ouh.1;uc001elx.4;uc001emc.2;uc001emd.2;uc001emg.2;uc021oui.1;uc021ouj.1;uc001emh.3	100288142;100288142;400818;400818;653513;653513;653513;653513;9659;9659;9659;9659;9659;9659;9659;9659;9659;9659	0;0;0;0;0;0;0;0;0;0;0;0;0;0;0;0;0;0
chr1	144990801	144991299	499	*	Intron (uc021ott.2/100288142, intron 53 of 131)	1	144676437	144995033	318597	2	653513	uc001elk.2	3734	NA	LOC653513	phosphodiesterase 4D interacting protein-like	uc021ott.2;uc021ots.1;uc010oye.3;uc031pnx.1;uc001elk.2;uc001ell.2;uc001elm.4;uc001eln.4;uc001elo.3;uc001elw.4;uc021ouh.1;uc001elx.4;uc001emc.2;uc001emd.2;uc001emg.2;uc021oui.1;uc021ouj.1;uc001emh.3	100288142;100288142;400818;400818;653513;653513;653513;653513;9659;9659;9659;9659;9659;9659;9659;9659;9659;9659	0;0;0;0;0;0;0;0;0;0;0;0;0;0;0;0;0;0
chr1	144992051	144992399	349	*	Intron (uc021ott.2/100288142, intron 53 of 131)	1	144676437	144995033	318597	2	653513	uc001elk.2	2634	NA	LOC653513	phosphodiesterase 4D interacting protein-like	uc021ott.2;uc021ots.1;uc010oye.3;uc031pnx.1;uc001elk.2;uc001ell.2;uc001elm.4;uc001eln.4;uc001elo.3;uc001elw.4;uc021ouh.1;uc001elx.4;uc001emc.2;uc001emd.2;uc001emg.2;uc021oui.1;uc021ouj.1;uc001emh.3	100288142;100288142;400818;400818;653513;653513;653513;653513;9659;9659;9659;9659;9659;9659;9659;9659;9659;9659	0;0;0;0;0;0;0;0;0;0;0;0;0;0;0;0;0;0
chr1	144992501	144992949	449	*	Intron (uc021ott.2/100288142, intron 53 of 131)	1	144676437	144995033	318597	2	653513	uc001elk.2	2084	NA	LOC653513	phosphodiesterase 4D interacting protein-like	uc021ott.2;uc021ots.1;uc010oye.3;uc031pnx.1;uc001elk.2;uc001ell.2;uc001elm.4;uc001eln.4;uc001elo.3;uc001elw.4;uc021ouh.1;uc001elx.4;uc001emc.2;uc001emd.2;uc001emg.2;uc021oui.1;uc021ouj.1;uc001emh.3	100288142;100288142;400818;400818;653513;653513;653513;653513;9659;9659;9659;9659;9659;9659;9659;9659;9659;9659	0;0;0;0;0;0;0;0;0;0;0;0;0;0;0;0;0;0
chr1	144998151	144998349	199	*	Promoter (1-2kb)	1	144951761	144997111	45351	2	9659	uc021ouj.1	-1040	ENSG00000178104	PDE4DIP	phosphodiesterase 4D interacting protein	uc021ott.2;uc021ots.1;uc010oye.3;uc031pnx.1;uc001elk.2;uc001ell.2;uc001elm.4;uc001eln.4;uc001elo.3;uc001elw.4;uc021ouh.1;uc001elx.4;uc001emc.2;uc001emd.2;uc001emg.2;uc021oui.1;uc021ouj.1;uc001emh.3	100288142;100288142;400818;400818;653513;653513;653513;653513;9659;9659;9659;9659;9659;9659;9659;9659;9659;9659	0;0;0;0;0;0;0;0;0;0;0;0;0;0;0;0;0;0
chr1	145001251	145001549	299	*	Intron (uc021ott.2/100288142, intron 53 of 131)	1	144951761	144997111	45351	2	9659	uc021ouj.1	-4140	ENSG00000178104	PDE4DIP	phosphodiesterase 4D interacting protein	uc021ott.2;uc021ots.1;uc010oye.3;uc031pnx.1;uc001elk.2;uc001ell.2;uc001elm.4;uc001eln.4;uc001elo.3;uc001elw.4;uc021ouh.1;uc001elx.4;uc001emc.2;uc001emd.2;uc001emg.2;uc021oui.1;uc021ouj.1;uc001emh.3	100288142;100288142;400818;400818;653513;653513;653513;653513;9659;9659;9659;9659;9659;9659;9659;9659;9659;9659	0;0;0;0;0;0;0;0;0;0;0;0;0;0;0;0;0;0
chr1	145003401	145003649	249	*	Intron (uc021ott.2/100288142, intron 53 of 131)	1	144951761	144997111	45351	2	9659	uc021ouj.1	-6290	ENSG00000178104	PDE4DIP	phosphodiesterase 4D interacting protein	uc021ott.2;uc021ots.1;uc010oye.3;uc031pnx.1;uc001elk.2;uc001ell.2;uc001elm.4;uc001eln.4;uc001elo.3;uc001elw.4;uc021ouh.1;uc001elx.4;uc001emc.2;uc001emd.2;uc001emg.2;uc021oui.1;uc021ouj.1;uc001emh.3	100288142;100288142;400818;400818;653513;653513;653513;653513;9659;9659;9659;9659;9659;9659;9659;9659;9659;9659	0;0;0;0;0;0;0;0;0;0;0;0;0;0;0;0;0;0
chr1	145006051	145006249	199	*	Intron (uc021ott.2/100288142, intron 53 of 131)	1	144951761	144997111	45351	2	9659	uc021ouj.1	-8940	ENSG00000178104	PDE4DIP	phosphodiesterase 4D interacting protein	uc021ott.2;uc021ots.1;uc010oye.3;uc031pnx.1;uc001elk.2;uc001ell.2;uc001elm.4;uc001eln.4;uc001elo.3;uc001elw.4;uc021ouh.1;uc001elx.4;uc001emc.2;uc001emd.2;uc001emg.2;uc021oui.1;uc021ouj.1;uc001emh.3	100288142;100288142;400818;400818;653513;653513;653513;653513;9659;9659;9659;9659;9659;9659;9659;9659;9659;9659	0;0;0;0;0;0;0;0;0;0;0;0;0;0;0;0;0;0
chr1	145009051	145009849	799	*	Intron (uc021ott.2/100288142, intron 53 of 131)	1	144951761	144997111	45351	2	9659	uc021ouj.1	-11940	ENSG00000178104	PDE4DIP	phosphodiesterase 4D interacting protein	uc021ott.2;uc021ots.1;uc010oye.3;uc031pnx.1;uc001elk.2;uc001ell.2;uc001elm.4;uc001eln.4;uc001elo.3;uc001elw.4;uc021ouh.1;uc001elx.4;uc001emc.2;uc001emd.2;uc001emg.2;uc021oui.1;uc021ouj.1;uc001emh.3	100288142;100288142;400818;400818;653513;653513;653513;653513;9659;9659;9659;9659;9659;9659;9659;9659;9659;9659	0;0;0;0;0;0;0;0;0;0;0;0;0;0;0;0;0;0
chr1	145013801	145014599	799	*	Exon (uc001emj.3/uc001emj.3, exon 1 of 3)	1	144951761	144997111	45351	2	9659	uc021ouj.1	-16690	ENSG00000178104	PDE4DIP	phosphodiesterase 4D interacting protein	uc021ott.2;uc021ots.1;uc010oye.3;uc031pnx.1;uc001elk.2;uc001ell.2;uc001elm.4;uc001eln.4;uc001elo.3;uc001elw.4;uc021ouh.1;uc001elx.4;uc001emc.2;uc001emd.2;uc001emg.2;uc021oui.1;uc021ouj.1;uc001emh.3	100288142;100288142;400818;400818;653513;653513;653513;653513;9659;9659;9659;9659;9659;9659;9659;9659;9659;9659	0;0;0;0;0;0;0;0;0;0;0;0;0;0;0;0;0;0
chr1	145019051	145019299	249	*	Intron (uc021ott.2/100288142, intron 53 of 131)	1	144676437	145039992	363556	2	653513	uc001elm.4	20693	NA	LOC653513	phosphodiesterase 4D interacting protein-like	uc021ott.2;uc021ots.1;uc010oye.3;uc031pnx.1;uc001elk.2;uc001ell.2;uc001elm.4;uc001eln.4;uc001elo.3;uc001elw.4;uc021ouh.1;uc001elx.4;uc001emc.2;uc001emd.2;uc001emg.2;uc021oui.1;uc021ouj.1;uc001emh.3	100288142;100288142;400818;400818;653513;653513;653513;653513;9659;9659;9659;9659;9659;9659;9659;9659;9659;9659	0;0;0;0;0;0;0;0;0;0;0;0;0;0;0;0;0;0
chr1	145021301	145021549	249	*	Intron (uc021ott.2/100288142, intron 53 of 131)	1	144676437	145039992	363556	2	653513	uc001elm.4	18443	NA	LOC653513	phosphodiesterase 4D interacting protein-like	uc021ott.2;uc021ots.1;uc010oye.3;uc031pnx.1;uc001elk.2;uc001ell.2;uc001elm.4;uc001eln.4;uc001elo.3;uc001elw.4;uc021ouh.1;uc001elx.4;uc001emc.2;uc001emd.2;uc001emg.2;uc021oui.1;uc021ouj.1;uc001emh.3	100288142;100288142;400818;400818;653513;653513;653513;653513;9659;9659;9659;9659;9659;9659;9659;9659;9659;9659	0;0;0;0;0;0;0;0;0;0;0;0;0;0;0;0;0;0
chr1	145021651	145021949	299	*	Intron (uc021ott.2/100288142, intron 53 of 131)	1	144676437	145039992	363556	2	653513	uc001elm.4	18043	NA	LOC653513	phosphodiesterase 4D interacting protein-like	uc021ott.2;uc021ots.1;uc010oye.3;uc031pnx.1;uc001elk.2;uc001ell.2;uc001elm.4;uc001eln.4;uc001elo.3;uc001elw.4;uc021ouh.1;uc001elx.4;uc001emc.2;uc001emd.2;uc001emg.2;uc021oui.1;uc021ouj.1;uc001emh.3	100288142;100288142;400818;400818;653513;653513;653513;653513;9659;9659;9659;9659;9659;9659;9659;9659;9659;9659	0;0;0;0;0;0;0;0;0;0;0;0;0;0;0;0;0;0
chr1	145029751	145031799	2049	*	Intron (uc021ott.2/100288142, intron 53 of 131)	1	144676437	145039992	363556	2	653513	uc001elm.4	8193	NA	LOC653513	phosphodiesterase 4D interacting protein-like	uc021ott.2;uc021ots.1;uc010oye.3;uc031pnx.1;uc001elk.2;uc001ell.2;uc001elm.4;uc001eln.4;uc001elo.3;uc001elw.4;uc021ouh.1;uc001elx.4;uc001emc.2;uc001emd.2;uc001emg.2;uc021oui.1;uc021ouj.1;uc001emh.3;uc001emk.4	100288142;100288142;400818;400818;653513;653513;653513;653513;9659;9659;9659;9659;9659;9659;9659;9659;9659;9659;9659	0;0;0;0;0;0;0;0;0;0;0;0;0;0;0;0;0;0;44387
chr1	145034801	145035099	299	*	Intron (uc021ott.2/100288142, intron 53 of 131)	1	144676437	145039992	363556	2	653513	uc001elm.4	4893	NA	LOC653513	phosphodiesterase 4D interacting protein-like	uc021ott.2;uc021ots.1;uc010oye.3;uc031pnx.1;uc001elk.2;uc001ell.2;uc001elm.4;uc001eln.4;uc001elo.3;uc001elw.4;uc021ouh.1;uc001elx.4;uc001emc.2;uc001emd.2;uc001emg.2;uc021oui.1;uc021ouj.1;uc001emh.3;uc001emk.4	100288142;100288142;400818;400818;653513;653513;653513;653513;9659;9659;9659;9659;9659;9659;9659;9659;9659;9659;9659	0;0;0;0;0;0;0;0;0;0;0;0;0;0;0;0;0;0;41087
chr1	145038901	145039449	549	*	Promoter (<=1kb)	1	144676437	145039992	363556	2	653513	uc001elm.4	543	NA	LOC653513	phosphodiesterase 4D interacting protein-like	uc021ott.2;uc021ots.1;uc010oye.3;uc031pnx.1;uc001elk.2;uc001ell.2;uc001elm.4;uc001eln.4;uc001elo.3;uc001elw.4;uc021ouh.1;uc001elx.4;uc001emc.2;uc001emd.2;uc001emg.2;uc021oui.1;uc021ouj.1;uc001emh.3;uc001emk.4	100288142;100288142;400818;400818;653513;653513;653513;653513;9659;9659;9659;9659;9659;9659;9659;9659;9659;9659;9659	0;0;0;0;0;0;0;0;0;0;0;0;0;0;0;0;0;0;36737
chr1	145039651	145039899	249	*	Promoter (<=1kb)	1	144676437	145039992	363556	2	653513	uc001elm.4	93	NA	LOC653513	phosphodiesterase 4D interacting protein-like	uc021ott.2;uc021ots.1;uc010oye.3;uc031pnx.1;uc001elk.2;uc001ell.2;uc001elm.4;uc001eln.4;uc001elo.3;uc001elw.4;uc021ouh.1;uc001elx.4;uc001emc.2;uc001emd.2;uc001emg.2;uc021oui.1;uc021ouj.1;uc001emh.3;uc001emk.4	100288142;100288142;400818;400818;653513;653513;653513;653513;9659;9659;9659;9659;9659;9659;9659;9659;9659;9659;9659	0;0;0;0;0;0;0;0;0;0;0;0;0;0;0;0;0;0;36287
chr1	145044101	145044599	499	*	Intron (uc021ott.2/100288142, intron 53 of 131)	1	144851424	145039992	188569	2	9659	uc001elx.4	-4109	ENSG00000178104	PDE4DIP	phosphodiesterase 4D interacting protein	uc021ott.2;uc021ots.1;uc010oye.3;uc031pnx.1;uc001elk.2;uc001ell.2;uc001elm.4;uc001eln.4;uc001elo.3;uc001elw.4;uc021ouh.1;uc001elx.4;uc001emc.2;uc001emd.2;uc001emg.2;uc021oui.1;uc021ouj.1;uc001emh.3;uc001emk.4	100288142;100288142;400818;400818;653513;653513;653513;653513;9659;9659;9659;9659;9659;9659;9659;9659;9659;9659;9659	0;0;0;0;0;0;0;0;0;0;0;0;0;0;0;0;0;0;31587
chr1	145047901	145048849	949	*	Intron (uc021ott.2/100288142, intron 53 of 131)	1	144851424	145039992	188569	2	9659	uc001elx.4	-7909	ENSG00000178104	PDE4DIP	phosphodiesterase 4D interacting protein	uc021ott.2;uc021ots.1;uc010oye.3;uc031pnx.1;uc001elm.4;uc001eln.4;uc031poa.1;uc001elo.3;uc001elx.4;uc001emh.3;uc001emk.4	100288142;100288142;400818;400818;653513;653513;9554;9659;9659;9659;9659	0;0;0;0;0;0;0;0;0;0;27337
chr1	145049651	145049949	299	*	Intron (uc021ott.2/100288142, intron 53 of 131)	1	144851424	145039992	188569	2	9659	uc001elx.4	-9659	ENSG00000178104	PDE4DIP	phosphodiesterase 4D interacting protein	uc021ott.2;uc021ots.1;uc010oye.3;uc031pnx.1;uc001elm.4;uc001eln.4;uc031poa.1;uc001elo.3;uc001elx.4;uc001emh.3;uc001emk.4	100288142;100288142;400818;400818;653513;653513;9554;9659;9659;9659;9659	0;0;0;0;0;0;0;0;0;0;26237
chr1	145054701	145054849	149	*	Intron (uc021ott.2/100288142, intron 53 of 131)	1	144851424	145039992	188569	2	9659	uc001elx.4	-14709	ENSG00000178104	PDE4DIP	phosphodiesterase 4D interacting protein	uc021ott.2;uc021ots.1;uc010oye.3;uc031pnx.1;uc001elm.4;uc001eln.4;uc031poa.1;uc001elo.3;uc001elx.4;uc001emh.3;uc001emk.4	100288142;100288142;400818;400818;653513;653513;9554;9659;9659;9659;9659	0;0;0;0;0;0;0;0;0;0;21337
chr1	145054951	145055249	299	*	Intron (uc021ott.2/100288142, intron 53 of 131)	1	144851424	145039992	188569	2	9659	uc001elx.4	-14959	ENSG00000178104	PDE4DIP	phosphodiesterase 4D interacting protein	uc021ott.2;uc021ots.1;uc010oye.3;uc031pnx.1;uc001elm.4;uc001eln.4;uc031poa.1;uc001elo.3;uc001elx.4;uc001emh.3;uc001emk.4	100288142;100288142;400818;400818;653513;653513;9554;9659;9659;9659;9659	0;0;0;0;0;0;0;0;0;0;20937
chr1	145057401	145057899	499	*	Intron (uc021ott.2/100288142, intron 53 of 131)	1	144851424	145039992	188569	2	9659	uc001elx.4	-17409	ENSG00000178104	PDE4DIP	phosphodiesterase 4D interacting protein	uc021ott.2;uc021ots.1;uc010oye.3;uc031pnx.1;uc001elm.4;uc001eln.4;uc031poa.1;uc001elo.3;uc001elx.4;uc001emh.3;uc001emk.4	100288142;100288142;400818;400818;653513;653513;9554;9659;9659;9659;9659	0;0;0;0;0;0;0;0;0;0;18287
chr1	145058051	145058449	399	*	Intron (uc021ott.2/100288142, intron 53 of 131)	1	144676437	145076186	399750	2	9659	uc001elo.3	17737	ENSG00000178104	PDE4DIP	phosphodiesterase 4D interacting protein	uc021ott.2;uc021ots.1;uc010oye.3;uc031pnx.1;uc001elm.4;uc001eln.4;uc031poa.1;uc001elo.3;uc001elx.4;uc001emh.3;uc001emk.4	100288142;100288142;400818;400818;653513;653513;9554;9659;9659;9659;9659	0;0;0;0;0;0;0;0;0;0;17737
chr1	145058801	145059349	549	*	Intron (uc021ott.2/100288142, intron 53 of 131)	1	144676437	145076186	399750	2	9659	uc001elo.3	16837	ENSG00000178104	PDE4DIP	phosphodiesterase 4D interacting protein	uc021ott.2;uc021ots.1;uc010oye.3;uc031pnx.1;uc001elm.4;uc001eln.4;uc031poa.1;uc001elo.3;uc001elx.4;uc001emh.3;uc001emk.4	100288142;100288142;400818;400818;653513;653513;9554;9659;9659;9659;9659	0;0;0;0;0;0;0;0;0;0;16837
chr1	145059551	145060049	499	*	Intron (uc021ott.2/100288142, intron 53 of 131)	1	144676437	145076186	399750	2	9659	uc001elo.3	16137	ENSG00000178104	PDE4DIP	phosphodiesterase 4D interacting protein	uc021ott.2;uc021ots.1;uc010oye.3;uc031pnx.1;uc001elm.4;uc001eln.4;uc031poa.1;uc001elo.3;uc001elx.4;uc001emh.3;uc001emk.4	100288142;100288142;400818;400818;653513;653513;9554;9659;9659;9659;9659	0;0;0;0;0;0;0;0;0;0;16137
chr1	145070801	145071099	299	*	Intron (uc021ott.2/100288142, intron 53 of 131)	1	144676437	145076186	399750	2	9659	uc001elo.3	5087	ENSG00000178104	PDE4DIP	phosphodiesterase 4D interacting protein	uc021ott.2;uc021ots.1;uc010oye.3;uc031pnx.1;uc001elm.4;uc001eln.4;uc031poa.1;uc001elo.3;uc001elx.4;uc001emh.3;uc001emk.4	100288142;100288142;400818;400818;653513;653513;9554;9659;9659;9659;9659	0;0;0;0;0;0;0;0;0;0;5087
chr1	145071751	145072799	1049	*	Intron (uc021ott.2/100288142, intron 53 of 131)	1	144676437	145076186	399750	2	9659	uc001elo.3	3387	ENSG00000178104	PDE4DIP	phosphodiesterase 4D interacting protein	uc021ott.2;uc021ots.1;uc010oye.3;uc031pnx.1;uc001elm.4;uc001eln.4;uc031poa.1;uc001elo.3;uc001elx.4;uc001emh.3;uc001emk.4	100288142;100288142;400818;400818;653513;653513;9554;9659;9659;9659;9659	0;0;0;0;0;0;0;0;0;0;3387
chr1	145111401	145111949	549	*	Intron (uc021ott.2/100288142, intron 53 of 131)	1	145096407	145116997	20591	1	9554	uc031poa.1	14994	ENSG00000265808	SEC22B	SEC22 homolog B, vesicle trafficking protein	uc021ott.2;uc021ots.1;uc010oye.3;uc031pnx.1;uc031poa.1;uc001elo.3;uc001emh.3;uc001emk.4	100288142;100288142;400818;400818;9554;9659;9659;9659	0;0;0;0;0;0;0;-35215
chr1	145117501	145117799	299	*	Intron (uc021ott.2/100288142, intron 53 of 131)	1	145096407	145116997	20591	1	9554	uc031poa.1	21094	ENSG00000265808	SEC22B	SEC22 homolog B, vesicle trafficking protein	uc021ott.2;uc021ots.1;uc010oye.3;uc031pnx.1;uc031poa.1;uc001elo.3;uc001emh.3;uc001emk.4	100288142;100288142;400818;400818;9554;9659;9659;9659	0;0;0;0;0;0;0;-41315
chr1	145189851	145190149	299	*	Intron (uc021ott.2/100288142, intron 53 of 131)	1	145209111	145304652	95542	1	100132406	uc021ouk.1	-18962	ENSG00000271425	NBPF10	NBPF member 10	uc021ouk.1;uc021ott.2;uc021ots.1;uc001emm.4;uc001emn.4;uc001emo.2;uc010oyh.1;uc031pob.1;uc010oye.3;uc031pnx.1	100132406;100288142;100288142;388677;388677;388677;388677;388677;400818;400818	0;0;0;0;0;0;0;0;0;0
chr1	145232951	145233299	349	*	Intron (uc021ott.2/100288142, intron 53 of 131)	1	145224597	145285912	61316	1	388677	uc031pob.1	8354	ENSG00000264343	NOTCH2NLA	notch 2 N-terminal like A	uc021ouk.1;uc021ott.2;uc021ots.1;uc001emm.4;uc001emn.4;uc001emo.2;uc010oyh.1;uc031pob.1;uc010oye.3;uc031pnx.1	100132406;100288142;100288142;388677;388677;388677;388677;388677;400818;400818	0;0;0;0;0;0;0;0;0;0
chr1	145235551	145235949	399	*	Intron (uc021ott.2/100288142, intron 53 of 131)	1	145224597	145285912	61316	1	388677	uc031pob.1	10954	ENSG00000264343	NOTCH2NLA	notch 2 N-terminal like A	uc021ouk.1;uc021ott.2;uc021ots.1;uc001emm.4;uc001emn.4;uc001emo.2;uc010oyh.1;uc031pob.1;uc010oye.3;uc031pnx.1	100132406;100288142;100288142;388677;388677;388677;388677;388677;400818;400818	0;0;0;0;0;0;0;0;0;0
chr1	145250901	145251099	199	*	Intron (uc021ott.2/100288142, intron 53 of 131)	1	145224597	145285912	61316	1	388677	uc031pob.1	26304	ENSG00000264343	NOTCH2NLA	notch 2 N-terminal like A	uc021ouk.1;uc001emq.1;uc021oul.2;uc031poc.1;uc021ott.2;uc021ots.1;uc001emm.4;uc001emn.4;uc001emo.2;uc010oyh.1;uc031pob.1;uc010oye.3;uc031pnx.1	100132406;100132406;100132406;100132406;100288142;100288142;388677;388677;388677;388677;388677;400818;400818	0;-42134;0;0;0;0;0;0;0;0;0;0;0
chr1	145255951	145256199	249	*	Intron (uc021ott.2/100288142, intron 53 of 131)	1	145224597	145285912	61316	1	388677	uc031pob.1	31354	ENSG00000264343	NOTCH2NLA	notch 2 N-terminal like A	uc021ouk.1;uc001emq.1;uc021oul.2;uc031poc.1;uc021oum.1;uc021ott.2;uc021ots.1;uc001emm.4;uc001emn.4;uc001emo.2;uc010oyh.1;uc031pob.1;uc010oye.3;uc031pnx.1;uc010oyi.3	100132406;100132406;100132406;100132406;100132406;100288142;100288142;388677;388677;388677;388677;388677;400818;400818;400818	0;-37034;0;0;0;0;0;0;0;0;0;0;0;0;0
chr1	145261051	145261499	449	*	Intron (uc021ott.2/100288142, intron 53 of 131)	1	145293233	145311154	17922	1	100132406	uc001emq.1	-31734	ENSG00000271425	NBPF10	NBPF member 10	uc021ouk.1;uc001emq.1;uc021oul.2;uc031poc.1;uc021oum.1;uc021ott.2;uc021ots.1;uc001emm.4;uc001emn.4;uc001emo.2;uc010oyh.1;uc031pob.1;uc010oye.3;uc031pnx.1;uc010oyi.3	100132406;100132406;100132406;100132406;100132406;100288142;100288142;388677;388677;388677;388677;388677;400818;400818;400818	0;-31734;0;0;0;0;0;0;0;0;0;0;0;0;0
chr1	145281301	145281699	399	*	5' UTR	1	145293233	145311154	17922	1	100132406	uc001emq.1	-11534	ENSG00000271425	NBPF10	NBPF member 10	uc021ouk.1;uc001emq.1;uc021oul.2;uc031poc.1;uc021oum.1;uc021oun.1;uc021ouo.1;uc001enc.2;uc010oyp.2;uc021ott.2;uc021ots.1;uc021oup.1;uc001emm.4;uc001emn.4;uc001emo.2;uc010oyh.1;uc031pob.1;uc010oye.3;uc031pnx.1;uc010oyi.3;uc010oyj.3;uc010oyl.3	100132406;100132406;100132406;100132406;100132406;100132406;100132406;100132406;100132406;100288142;100288142;100288142;388677;388677;388677;388677;388677;400818;400818;400818;400818;400818	0;-11534;0;0;0;0;0;0;0;0;0;0;0;0;0;0;0;0;0;0;0;0
chr1	145285601	145286049	449	*	3' UTR	1	145293233	145311154	17922	1	100132406	uc001emq.1	-7184	ENSG00000271425	NBPF10	NBPF member 10	uc021ouk.1;uc001emq.1;uc021oul.2;uc031poc.1;uc021oum.1;uc021oun.1;uc021ouo.1;uc001enc.2;uc010oyp.2;uc021ott.2;uc021ots.1;uc021oup.1;uc001emm.4;uc001emn.4;uc001emo.2;uc010oyh.1;uc031pob.1;uc010oye.3;uc031pnx.1;uc010oyi.3;uc010oyj.3;uc010oyl.3	100132406;100132406;100132406;100132406;100132406;100132406;100132406;100132406;100132406;100288142;100288142;100288142;388677;388677;388677;388677;388677;400818;400818;400818;400818;400818	0;-7184;0;0;0;0;0;0;0;0;0;0;0;0;0;0;0;0;0;0;0;0
chr1	145319901	145320099	199	*	Promoter (1-2kb)	1	145318054	145344236	26183	1	100288142	uc021oup.1	1847	ENSG00000162825	NBPF20	NBPF member 20	uc021ouk.1;uc001emq.1;uc021oul.2;uc031poc.1;uc021oum.1;uc021oun.1;uc021ouo.1;uc001enc.2;uc010oyp.2;uc021ouq.1;uc021ott.2;uc021ots.1;uc021oup.1;uc001emm.4;uc001emn.4;uc001emo.2;uc010oyh.1;uc031pob.1;uc010oye.3;uc031pnx.1;uc010oyi.3;uc010oyj.3;uc010oyl.3	100132406;100132406;100132406;100132406;100132406;100132406;100132406;100132406;100132406;100132406;100288142;100288142;100288142;388677;388677;388677;388677;388677;400818;400818;400818;400818;400818	0;26668;0;0;0;0;0;0;0;-40456;0;0;0;0;0;0;0;0;0;0;0;0;0
chr1	145330351	145330549	199	*	Intron (uc021ott.2/100288142, intron 63 of 131)	1	145324348	145353680	29333	1	100132406	uc010oyp.2	6003	ENSG00000271425	NBPF10	NBPF member 10	uc021ouk.1;uc001emq.1;uc021oul.2;uc031poc.1;uc021oum.1;uc021oun.1;uc021ouo.1;uc001enc.2;uc010oyp.2;uc021ouq.1;uc021ott.2;uc021ots.1;uc021oup.1;uc001emm.4;uc001emn.4;uc001emo.2;uc010oyh.1;uc031pob.1;uc010oye.3;uc031pnx.1;uc010oyi.3;uc010oyj.3;uc010oyl.3	100132406;100132406;100132406;100132406;100132406;100132406;100132406;100132406;100132406;100132406;100288142;100288142;100288142;388677;388677;388677;388677;388677;400818;400818;400818;400818;400818	0;37118;0;0;0;0;0;0;0;-30006;0;0;0;0;0;0;0;0;0;0;0;0;0
chr1	145350301	145350649	349	*	Exon (uc021ott.2/100288142, exon 89 of 132)	1	145360555	145364674	4120	1	100132406	uc021ouq.1	-9906	ENSG00000271425	NBPF10	NBPF member 10	uc021ouk.1;uc001emq.1;uc021oul.2;uc031poc.1;uc021oum.1;uc021oun.1;uc021ouo.1;uc001enc.2;uc010oyp.2;uc021ouq.1;uc021ott.2;uc021ots.1;uc021oup.1;uc010oye.3;uc031pnx.1;uc010oyi.3;uc010oyj.3;uc010oyl.3	100132406;100132406;100132406;100132406;100132406;100132406;100132406;100132406;100132406;100132406;100288142;100288142;100288142;400818;400818;400818;400818;400818	0;57068;0;0;0;0;0;0;0;-9906;0;0;0;0;0;0;0;0
chr1	145381101	145381199	99	*	Intron (uc021ott.2/100288142, intron 99 of 131)	1	145360555	145364674	4120	1	100132406	uc021ouq.1	20546	ENSG00000271425	NBPF10	NBPF member 10	uc021oul.2;uc031poc.1;uc021oum.1;uc021oun.1;uc021ouo.1;uc001enc.2;uc010oyp.2;uc021ouq.1;uc021ott.2;uc021ots.1;uc021oup.1;uc001eni.2;uc001enj.2;uc001enk.2;uc001enl.2;uc010oye.3;uc031pnx.1;uc010oyi.3;uc010oyj.3;uc010oyl.3	100132406;100132406;100132406;100132406;100132406;100132406;100132406;100132406;100288142;100288142;100288142;148738;148738;148738;148738;400818;400818;400818;400818;400818	0;0;0;0;0;0;0;20546;0;0;0;-31992;-31992;-31992;-31992;0;0;0;0;0
chr1	146473051	146473199	149	*	Distal Intergenic	1	146490895	146514599	23705	2	728989	uc001epd.3	41400	NA	LOC728989	phosphodiesterase 4D interacting protein pseudogene	uc031poc.1;uc021ott.2;uc010ozk.2;uc031poi.1;uc021ovf.1;uc010ozl.3;uc001epd.3	100132406;100288142;149013;149013;149013;149013;728989	0;0;138861;99194;77744;68462;41400
chr1	146643851	146644349	499	*	Promoter (<=1kb)	1	146626685	146644129	17445	2	5565	uc001epe.3	0	ENSG00000131791	PRKAB2	protein kinase AMP-activated non-catalytic subunit beta 2	uc001epg.1;uc001eph.4;uc001epi.2;uc001epj.2;uc001epk.4;uc001epe.3;uc010ozm.2;uc010ozn.2;uc009wjf.1	171423;2330;2330;2330;2330;5565;5565;5565;5565	-5081;52881;52881;52881;52881;0;0;0;0
chr1	147770151	147770399	249	*	Intron (uc001eqe.3/728841, intron 12 of 13)	1	147806603	147806678	76	2	100847044	uc031pom.1	36279	ENSG00000283676	MIR5087	microRNA 5087	uc031pom.1;uc001eqe.3;uc001eqf.4;uc001eqg.3	100847044;728841;728841;728841	36279;0;0;0
chr1	147994151	147994499	349	*	Intron (uc001eqe.3/728841, intron 12 of 13)	1	148005403	148011788	6386	2	728841	uc010pad.1	17289	ENSG00000270231	NBPF8	NBPF member 8	uc021ovz.1;uc021owa.1;uc021owb.1;uc021owf.2;uc001eqo.1;uc021owg.1;uc021owh.1;uc001eqp.3;uc001eqe.3;uc001eqf.4;uc001eqg.3;uc001eqq.3;uc010pad.1;uc021owc.1;uc021owd.1;uc021owe.1;uc009wkf.1	25832;25832;25832;25832;388685;400818;400818;653505;728841;728841;728841;728841;728841;728841;728841;728841;728841	0;0;0;263990;0;303763;326007;-38732;0;0;0;0;0;0;0;0;352292
chr1	148008651	148008749	99	*	Intron (uc001eqe.3/728841, intron 9 of 13)	1	148005403	148011788	6386	2	728841	uc010pad.1	3039	ENSG00000270231	NBPF8	NBPF member 8	uc021ovz.1;uc021owa.1;uc021owb.1;uc021owf.2;uc001eqo.1;uc021owg.1;uc021owh.1;uc001eqe.3;uc001eqf.4;uc001eqg.3;uc001eqq.3;uc010pad.1;uc021owc.1;uc021owd.1;uc021owe.1;uc009wkf.1	25832;25832;25832;25832;388685;400818;400818;728841;728841;728841;728841;728841;728841;728841;728841;728841	0;0;0;249740;0;289513;311757;0;0;0;0;0;0;0;0;338042
chr1	148009301	148009449	149	*	Exon (uc001eqq.3/728841, exon 16 of 22)	1	148005403	148011788	6386	2	728841	uc010pad.1	2339	ENSG00000270231	NBPF8	NBPF member 8	uc021ovz.1;uc021owa.1;uc021owb.1;uc021owf.2;uc001eqo.1;uc021owg.1;uc021owh.1;uc001eqe.3;uc001eqf.4;uc001eqg.3;uc001eqq.3;uc010pad.1;uc021owc.1;uc021owd.1;uc021owe.1;uc009wkf.1	25832;25832;25832;25832;388685;400818;400818;728841;728841;728841;728841;728841;728841;728841;728841;728841	0;0;0;249040;0;288813;311057;0;0;0;0;0;0;0;0;337342
chr1	148010251	148010999	749	*	Promoter (<=1kb)	1	148005403	148011788	6386	2	728841	uc010pad.1	789	ENSG00000270231	NBPF8	NBPF member 8	uc021ovz.1;uc021owa.1;uc021owb.1;uc021owf.2;uc001eqo.1;uc021owg.1;uc021owh.1;uc001eqe.3;uc001eqf.4;uc001eqg.3;uc001eqq.3;uc010pad.1;uc021owc.1;uc021owd.1;uc021owe.1;uc009wkf.1	25832;25832;25832;25832;388685;400818;400818;728841;728841;728841;728841;728841;728841;728841;728841;728841	0;0;0;247490;0;287263;309507;0;0;0;0;0;0;0;0;335792
chr1	148598801	148599149	349	*	Distal Intergenic	1	148560847	148596267	35421	1	284565	uc001esc.2	37954	ENSG00000266338	NBPF15	NBPF member 15	uc001esb.2;uc001esc.2;uc010paz.2	284565;284565;730262	40613;37954;-44862
chr1	148631401	148631849	449	*	Distal Intergenic	1	148644011	148644795	785	1	730262	uc010paz.2	-12162	ENSG00000271567	PPIAL4E	peptidylprolyl isomerase A like 4E	uc001esb.2;uc001esc.2;uc010paz.2	284565;284565;730262	73213;70554;-12162
chr1	148680151	148680549	399	*	Distal Intergenic	1	148644011	148644795	785	1	730262	uc010paz.2	36140	ENSG00000271567	PPIAL4E	peptidylprolyl isomerase A like 4E	uc010paz.2	730262	36140
chr1	148844401	148844649	249	*	Distal Intergenic	1	148806015	148806799	785	1	728945	uc010pbb.2	38386	ENSG00000279782	PPIAL4F	peptidylprolyl isomerase A like 4F	uc010pbb.2	728945	38386
chr1	148849951	148850499	549	*	Distal Intergenic	1	148806015	148806799	785	1	728945	uc010pbb.2	43936	ENSG00000279782	PPIAL4F	peptidylprolyl isomerase A like 4F	uc010pbb.2	728945	43936
chr1	148871801	148871999	199	*	Distal Intergenic	1	148928286	148951595	23310	1	645166	uc010pbc.1	-56287	ENSG00000288905	LSP1P5	LSP1 pseudogene 5	NA	NA	NA
chr1	148905101	148905599	499	*	Distal Intergenic	1	148928286	148951595	23310	1	645166	uc010pbc.1	-22687	ENSG00000288905	LSP1P5	LSP1 pseudogene 5	uc010pbc.1;uc010pbd.1;uc009wkw.1	645166;645166;645166	0;0;0
chr1	148913701	148914149	449	*	Distal Intergenic	1	148928286	148951595	23310	1	645166	uc010pbc.1	-14137	ENSG00000288905	LSP1P5	LSP1 pseudogene 5	uc010pbc.1;uc010pbd.1;uc009wkw.1	645166;645166;645166	0;0;0
chr1	148922751	148922949	199	*	Distal Intergenic	1	148928286	148951595	23310	1	645166	uc010pbc.1	-5337	ENSG00000288905	LSP1P5	LSP1 pseudogene 5	uc010pbc.1;uc010pbd.1;uc009wkw.1	645166;645166;645166	0;0;0
chr1	148925101	148925399	299	*	Distal Intergenic	1	148928286	148951595	23310	1	645166	uc010pbc.1	-2887	ENSG00000288905	LSP1P5	LSP1 pseudogene 5	uc010pbc.1;uc010pbd.1;uc009wkw.1	645166;645166;645166	0;0;0
chr1	148949601	148949799	199	*	Intron (uc010pbc.1/645166, intron 3 of 3)	1	148930405	148953054	22650	1	645166	uc009wkw.1	19196	ENSG00000288905	LSP1P5	LSP1 pseudogene 5	uc010pbc.1;uc010pbd.1;uc009wkw.1	645166;645166;645166	0;0;0
chr1	149009601	149009849	249	*	Distal Intergenic	1	148930405	148953054	22650	1	645166	uc009wkw.1	79196	ENSG00000288905	LSP1P5	LSP1 pseudogene 5	NA	NA	NA
chr1	149020701	149021199	499	*	Distal Intergenic	1	148930405	148953054	22650	1	645166	uc009wkw.1	90296	ENSG00000288905	LSP1P5	LSP1 pseudogene 5	NA	NA	NA
chr1	149031901	149033049	1149	*	Distal Intergenic	1	148930405	148953054	22650	1	645166	uc009wkw.1	101496	ENSG00000288905	LSP1P5	LSP1 pseudogene 5	NA	NA	NA
chr1	149223251	149223499	249	*	Distal Intergenic	1	149279476	149291742	12267	1	388692	uc010pbf.2	-55977	ENSG00000291158	LINC02591	long intergenic non-protein coding RNA 2591	NA	NA	NA
chr1	149291251	149291749	499	*	3' UTR	1	149279476	149291742	12267	1	388692	uc010pbf.2	11775	ENSG00000291158	LINC02591	long intergenic non-protein coding RNA 2591	uc010pbf.2	388692	0
chr1	149814101	149814699	599	*	Promoter (<=1kb)	1	149813785	149814318	534	2	723790	uc001esw.3	0	ENSG00000288859	H2AC19	H2A clustered histone 19	uc001esy.3;uc001esv.3;uc001ete.3;uc021oxz.1;uc010pbj.2;uc010pbk.2;uc001esr.4;uc010pbl.2;uc001esx.3;uc001esw.3;uc001etd.3;uc001etc.3;uc001ess.3;uc001etb.3	126961;126961;317772;337873;440689;440689;440689;653604;723790;723790;8338;8349;8370;8370	-9482;-1336;44767;7641;-30173;-30173;-30173;-28865;0;0;-43826;0;9880;18026
chr1	149822351	149822799	449	*	Promoter (<=1kb)	1	149822628	149823161	534	1	723790	uc001esx.3	0	ENSG00000288859	H2AC19	H2A clustered histone 19	uc001esy.3;uc001esv.3;uc001ete.3;uc021oxz.1;uc010pbj.2;uc010pbk.2;uc001esr.4;uc001etf.3;uc010pbl.2;uc001esx.3;uc001esw.3;uc001etd.3;uc001etc.3;uc001ess.3;uc001etb.3	126961;126961;317772;337873;440689;440689;440689;51027;653604;723790;723790;8338;8349;8370;8370	-1382;-9586;36667;-11;-38423;-38423;-38423;-48356;-37115;0;0;-35726;0;18130;9926
chr1	149857851	149858149	299	*	Promoter (<=1kb)	1	149856010	149858232	2223	2	8349	uc001etc.3	83	ENSG00000184678	H2BC21	H2B clustered histone 21	uc001etk.2;uc009wll.1;uc001etm.2;uc001etl.4;uc010pbm.1;uc010pbn.1;uc010pbo.1;uc001esy.3;uc001esv.3;uc001ete.3;uc021oxz.1;uc001etf.3;uc001esx.3;uc001esw.3;uc001etd.3;uc001etc.3;uc001etb.3;uc009wlk.3;uc001etg.3;uc001eth.2	10262;10262;10903;10903;10903;10903;10903;126961;126961;317772;337873;51027;723790;723790;8338;8349;8370;9900;9900;9900	41995;41813;50117;50642;50129;48879;50642;33670;-45086;1317;-35511;-13006;0;0;-376;0;-25126;20374;31285;31285
chr1	151253901	151254149	249	*	Promoter (<=1kb)	1	151254094	151260882	6789	1	57592	uc001exp.1	0	ENSG00000143373	ZNF687	zinc finger protein 687	uc001exr.3;uc001exs.3;uc001ext.3;uc001exu.3;uc010pcw.2;uc001exl.3;uc001exp.1;uc001exq.3;uc009wmo.3;uc009wmp.3;uc021oyo.1;uc001exi.3;uc001exj.3;uc001exk.3;uc010pcu.2;uc010pcv.2	5298;5298;5298;5298;5298;5710;57592;57592;57592;57592;8394;8394;8394;8394;8394;8394	46042;46042;46042;46042;46042;26704;0;-642;-642;-4602;82880;82880;82880;82880;82880;47228
chr1	151342851	151343349	499	*	Promoter (1-2kb)	1	151336778	151345210	8433	2	8991	uc001exx.4	1861	ENSG00000143416	SELENBP1	selenium binding protein 1	uc021oyq.1;uc001eyd.2;uc001eyf.2;uc009wmv.2;uc010pdb.2;uc010pdc.2;uc010pdd.2;uc001exr.3;uc001exs.3;uc001ext.3;uc001exu.3;uc010pcw.2;uc010pda.2;uc001eyc.1;uc001exv.1;uc001exw.1;uc010pcx.1;uc001exx.4;uc001eya.4;uc010pcy.3;uc010pcz.3	23126;23126;23126;23126;23126;23126;23126;5298;5298;5298;5298;5298;5692;5692;5993;5993;5993;8991;8991;8991;8991	71332;88592;88592;88592;88592;88592;88592;-42660;-42660;-42660;-42660;-42660;-28692;-28692;-23082;-23082;-23082;0;0;0;0
chr1	153031851	153032049	199	*	Promoter (1-2kb)	1	153028596	153029988	1393	2	6700	uc001fbd.3	-1863	ENSG00000241794	SPRR2A	small proline rich protein 2A	uc001fba.3;uc001fbd.3;uc001fbf.3;uc001fbg.3;uc001fbb.2;uc001fbh.3	6699;6700;6700;6701;6703;6704	28172;-1863;0;12035;-18257;34952
chr1	153316301	153316599	299	*	Intron (uc001fbo.3/57115, intron 4 of 8)	1	153302597	153321022	18426	2	57115	uc001fbo.3	4423	ENSG00000163218	PGLYRP4	peptidoglycan recognition protein 4	uc001fbn.1;uc001fbo.3;uc001fbp.3;uc001fbs.3;uc001fbq.3;uc001fbr.1	114771;57115;57115;6279;6280;6283	-33107;0;0;47065;-13731;31476
chr1	153539001	153539249	249	*	Promoter (<=1kb)	1	153533585	153538306	4722	2	6273	uc001fcb.3	-695	ENSG00000196754	S100A2	S100 calcium binding protein A2	uc001fcc.3;uc001fcd.1;uc001fce.3;uc001fcb.3;uc001fca.1;uc001fby.3;uc001fbz.3;uc001fbx.3;uc001fbw.1	140576;140576;57402;6273;6274;6275;6275;6276;6277	42232;46265;49559;-695;-17267;-20719;-20719;-24760;-30284
chr1	154130201	154130549	349	*	3' UTR	1	153965168	154127592	162425	2	91181	uc010peh.2	-2609	ENSG00000143552	NUP210L	nucleoporin 210 like	uc021pac.1;uc001feg.2;uc001feh.2;uc001fei.2;uc009wos.1;uc001fee.2;uc001fdx.1;uc031ppm.1;uc010pei.1;uc001fdy.1;uc001fdz.1;uc001fea.1;uc001feb.1;uc001fed.2;uc010pej.2;uc031ppn.1;uc031ppo.1;uc001fec.2;uc031ppp.1;uc009woq.3;uc001fdw.3;uc010peh.2	100126346;25912;25912;25912;25912;388701;7170;7170;7170;7170;7170;7170;7170;7170;7170;7170;7170;7170;7170;91181;91181;91181	35670;62724;62724;62724;62724;48292;0;0;0;0;0;0;0;0;0;0;0;34062;34062;-21753;-2609;-2609
chr1	154326951	154327399	449	*	Distal Intergenic	1	154301275	154310020	8746	1	57198	uc001fey.1	25676	ENSG00000143515	ATP8B2	ATPase phospholipid transporting 8B2	uc001few.3;uc001fex.3;uc001fey.1;uc001feu.3	57198;57198;57198;89872	28915;26675;25676;33359
chr1	154400201	154400349	149	*	Intron (uc021paf.1/3570, intron 1 of 6)	1	154377669	154441926	64258	1	3570	uc001ffa.2	22532	ENSG00000160712	IL6R	interleukin 6 receptor	uc021paf.1;uc001fez.2;uc001ffa.2	3570;3570;3570	0;0;0
chr1	155162751	155162999	249	*	Promoter (<=1kb)	1	155161687	155162706	1020	2	4582	uc001fiw.2	-45	ENSG00000185499	MUC1	mucin 1, cell surface associated	uc001fho.3;uc001fhp.1;uc001fjh.3;uc010pfw.2;uc010pfx.2;uc001fjk.3;uc001fjl.3;uc010pfy.2;uc009wqk.2;uc001fjd.3;uc001fje.4;uc001fjf.4;uc021pau.2;uc001fjb.3;uc001fjc.3;uc001fhz.3;uc001fhy.3;uc010pfb.2;uc009wph.3;uc009wpi.3;uc010pfc.2;uc010pfd.2;uc010pfe.2;uc010pff.2;uc010pfg.2;uc010pfh.2;uc010pfi.2;uc010pfj.2;uc010pfk.2;uc010pfl.2;uc031ppt.1;uc031ppu.1;uc001fia.3;uc001fib.3;uc001fic.3;uc001fid.3;uc0…	200185;200185;2629;2629;2629;2629;2629;2629;2629;2630;2630;2630;2630;4580;4580;4582;4582;4582;4582;4582;4582;4582;4582;4582;4582;4582;4582;4582;4582;4582;4582;4582;4582;4582;4582;4582;4582;4582;4582;4582;4582;4582;4582;4582;4582;4582;4582;4582;4582;4582;4582;4582;4582;4582;4582;4582;4582;4582;4582;4582;4582;4582;4582;4582;4582;4582;4582;4582;4582;4582;4582;4582;4582;4582;4582;4582;4582;4582;4582;…	-16947;-16947;48070;48070;48070;0;0;0;0;25810;34326;34326;45442;0;0;-1353;-1323;-650;-67;-67;-67;-67;-67;-67;-67;-67;-67;-67;-67;-67;-67;-67;-45;-45;-45;-45;-45;-45;-45;-45;-45;-45;-45;-45;-45;-45;-45;-45;-45;-45;-45;-45;-45;-45;-45;-45;-45;-45;-45;-45;-45;-45;-45;-45;-45;-45;-45;-45;-45;-45;-45;-45;-45;-45;-45;-45;-45;-45;-45;-45;-45;-45;-45;-45;-45;-45;-45;-49868;-49755;-1969;8826;14773;14773;1…
chr1	155163101	155163449	349	*	Promoter (<=1kb)	1	155161687	155162706	1020	2	4582	uc001fiw.2	-395	ENSG00000185499	MUC1	mucin 1, cell surface associated	uc001fho.3;uc001fhp.1;uc001fjh.3;uc010pfw.2;uc010pfx.2;uc001fjk.3;uc001fjl.3;uc010pfy.2;uc009wqk.2;uc001fjd.3;uc001fje.4;uc001fjf.4;uc021pau.2;uc001fjb.3;uc001fjc.3;uc001fhz.3;uc001fhy.3;uc010pfb.2;uc009wph.3;uc009wpi.3;uc010pfc.2;uc010pfd.2;uc010pfe.2;uc010pff.2;uc010pfg.2;uc010pfh.2;uc010pfi.2;uc010pfj.2;uc010pfk.2;uc010pfl.2;uc031ppt.1;uc031ppu.1;uc001fia.3;uc001fib.3;uc001fic.3;uc001fid.3;uc0…	200185;200185;2629;2629;2629;2629;2629;2629;2629;2630;2630;2630;2630;4580;4580;4582;4582;4582;4582;4582;4582;4582;4582;4582;4582;4582;4582;4582;4582;4582;4582;4582;4582;4582;4582;4582;4582;4582;4582;4582;4582;4582;4582;4582;4582;4582;4582;4582;4582;4582;4582;4582;4582;4582;4582;4582;4582;4582;4582;4582;4582;4582;4582;4582;4582;4582;4582;4582;4582;4582;4582;4582;4582;4582;4582;4582;4582;4582;4582;…	-17297;-17297;47620;47620;47620;0;0;0;0;25360;33876;33876;44992;0;0;-1703;-1673;-1000;-417;-417;-417;-417;-417;-417;-417;-417;-417;-417;-417;-417;-417;-417;-395;-395;-395;-395;-395;-395;-395;-395;-395;-395;-395;-395;-395;-395;-395;-395;-395;-395;-395;-395;-395;-395;-395;-395;-395;-395;-395;-395;-395;-395;-395;-395;-395;-395;-395;-395;-395;-395;-395;-395;-395;-395;-395;-395;-395;-395;-395;-395;-39…
chr1	155178351	155178649	299	*	Promoter (<=1kb)	1	155178490	155183624	5135	1	4580	uc001fjb.3	0	ENSG00000173171	MTX1	metaxin 1	uc001fjs.3;uc001fjt.3;uc009wql.3;uc001fjm.3;uc001fjn.3;uc001fjo.3;uc001fjp.3;uc001fjq.1;uc001fho.3;uc001fhp.1;uc001fjh.3;uc010pfw.2;uc010pfx.2;uc001fjk.3;uc001fjl.3;uc010pfy.2;uc009wqk.2;uc001fjd.3;uc001fje.4;uc001fjf.4;uc021pau.2;uc001fjb.3;uc001fjc.3;uc001fhz.3;uc001fhy.3;uc010pfb.2;uc009wph.3;uc009wpi.3;uc010pfc.2;uc010pfd.2;uc010pfe.2;uc010pff.2;uc010pfg.2;uc010pfh.2;uc010pfi.2;uc010pfj.2;uc0…	10067;10067;10712;10712;10712;10712;10712;10712;200185;200185;2629;2629;2629;2629;2629;2629;2629;2630;2630;2630;2630;4580;4580;4582;4582;4582;4582;4582;4582;4582;4582;4582;4582;4582;4582;4582;4582;4582;4582;4582;4582;4582;4582;4582;4582;4582;4582;4582;4582;4582;4582;4582;4582;4582;4582;4582;4582;4582;4582;4582;4582;4582;4582;4582;4582;4582;4582;4582;4582;4582;4582;4582;4582;4582;4582;4582;4582;45…	53527;53527;43047;46625;46625;46625;46625;46625;-32547;-32547;32420;32420;32420;0;0;0;0;10160;18676;18676;29792;0;0;-16953;-16923;-16250;-15667;-15667;-15667;-15667;-15667;-15667;-15667;-15667;-15667;-15667;-15667;-15667;-15667;-15667;-15645;-15645;-15645;-15645;-15645;-15645;-15645;-15645;-15645;-15645;-15645;-15645;-15645;-15645;-15645;-15645;-15645;-15645;-15645;-15645;-15645;-15645;-15645;-15…
chr1	155214401	155214949	549	*	Promoter (<=1kb)	1	155204239	155214653	10415	2	2629	uc001fjk.3	0	ENSG00000177628	GBA1	glucosylceramidase beta 1	uc001fjs.3;uc001fjt.3;uc009wql.3;uc001fjm.3;uc001fjn.3;uc001fjo.3;uc001fjp.3;uc001fjq.1;uc001fjw.3;uc001fjx.3;uc001fjy.3;uc009wqm.3;uc001fjh.3;uc010pfw.2;uc010pfx.2;uc001fjk.3;uc001fjl.3;uc010pfy.2;uc009wqk.2;uc001fjd.3;uc001fje.4;uc001fjf.4;uc021pau.2;uc001fjb.3;uc001fjc.3;uc001fka.4;uc001fkb.4;uc010pfz.2;uc001fjz.2;uc021pas.1;uc021pat.1;uc001fix.3;uc001fiy.3;uc009wqi.3;uc010pfu.2;uc010pfv.2;uc0…	10067;10067;10712;10712;10712;10712;10712;10712;1196;1196;1196;1196;2629;2629;2629;2629;2629;2629;2629;2630;2630;2630;2630;4580;4580;5313;5313;57657;57657;693235;7059;7059;7059;7059;7059;7059;7059;7059	17227;17227;6747;10325;10325;10325;10325;10325;28332;28332;28332;32552;-3332;-3332;-3332;0;0;0;0;-25592;-17076;-17076;-5960;0;0;55843;0;-32269;-32269;49433;-42576;-36629;-36629;-36629;-36629;-36629;0;0
chr1	155271151	155271399	249	*	Promoter (<=1kb)	1	155259084	155271225	12142	2	5313	uc001fkb.4	0	ENSG00000143627	PKLR	pyruvate kinase L/R	uc001fjs.3;uc001fjt.3;uc009wql.3;uc001fjm.3;uc001fjn.3;uc001fjo.3;uc001fjp.3;uc001fjq.1;uc001fjw.3;uc001fjx.3;uc001fjy.3;uc009wqm.3;uc001fkc.2;uc001fkd.2;uc021paw.1;uc021pax.1;uc001fke.2;uc001fkj.2;uc001fkk.2;uc009wqo.1;uc001fkl.2;uc001fkp.3;uc009wqp.2;uc010pgb.2;uc031ppx.1;uc001fkn.3;uc001fko.3;uc001fkr.3;uc001fki.3;uc001fka.4;uc001fkb.4;uc010pga.1;uc001fkt.3;uc009wqq.3;uc010pfz.2;uc001fjz.2;uc0…	10067;10067;10712;10712;10712;10712;10712;10712;1196;1196;1196;1196;2224;2224;2224;2224;2224;23623;23623;23623;23623;23623;23623;23623;23623;23623;23623;23623;284618;5313;5313;5313;55870;55870;57657;57657;693140	-38975;-38975;-49455;-45877;-45877;-45877;-45877;-45877;-27870;-27870;-27870;-23650;-7140;-7140;-7140;-7140;-7306;-19241;-19241;-21886;-22329;-22329;-22329;-22329;-22329;-22787;-22787;-22787;22539;-359;0;-359;260925;260925;23933;23933;44837
chr1	155583251	155583649	399	*	Exon (uc001fkw.4/55154, exon 12 of 14)	1	155580411	155584758	4348	1	55154	uc001flc.4	2840	ENSG00000125459	MSTO1	misato mitochondrial distribution and morphology regulator 1	uc001fkw.4;uc001fkx.4;uc001fky.4;uc001fla.4;uc001flb.4;uc001fld.5;uc009wqs.4;uc010pgf.3;uc031ppy.1;uc001flc.4;uc010pgg.2;uc010pgh.2;uc001flh.3;uc009wqt.3;uc010pgi.2;uc001fli.3;uc001flj.3;uc001flk.3;uc001fll.3;uc001flm.3;uc009wqu.3;uc009wqv.3;uc009wqw.3;uc001fln.3;uc001flo.3;uc001flp.3;uc010pgj.2;uc021paz.1;uc009wqx.3;uc010pge.2	55154;55154;55154;55154;55154;55154;55154;55154;55154;55154;55249;55249;55249;55249;55249;55249;55249;55249;55249;55249;55249;55249;55249;55249;55249;55249;55249;55249;55249;645676	0;0;0;0;0;0;0;0;0;0;62888;65971;74798;74798;74798;0;0;0;0;0;0;0;0;0;0;0;0;0;74798;51479
chr1	155658451	155658949	499	*	Promoter (<=1kb)	1	155629233	155658568	29336	2	55249	uc001fli.3	0	ENSG00000163374	YY1AP1	YY1 associated protein 1	uc010pgg.2;uc010pgh.2;uc001flh.3;uc009wqt.3;uc010pgi.2;uc001fli.3;uc001flj.3;uc001flk.3;uc001fll.3;uc001flm.3;uc009wqu.3;uc009wqv.3;uc009wqw.3;uc001fln.3;uc001flo.3;uc001flp.3;uc010pgj.2;uc021paz.1;uc009wqx.3;uc010pgk.2;uc001flr.3;uc001fls.3;uc010pgl.2;uc010pgm.2;uc001flq.3	55249;55249;55249;55249;55249;55249;55249;55249;55249;55249;55249;55249;55249;55249;55249;55249;55249;55249;55249;55249;7818;7818;7818;7818;7818	-11914;-8831;-4;-4;-4;0;0;0;0;0;0;0;0;0;0;0;0;0;-4;-4;0;0;0;0;0
chr1	155946401	155946549	149	*	Promoter (1-2kb)	1	155916630	155947966	31337	2	9181	uc001fmr.2	1417	ENSG00000116584	ARHGEF2	Rho/Rac guanine nucleotide exchange factor 2	uc001fmi.1;uc001fmj.1;uc009wrl.1;uc001fml.1;uc001fmm.3;uc001fmo.3;uc010pgs.2;uc001fmv.3;uc001fmx.3;uc010pgw.2;uc001fmq.2;uc001fmr.2;uc001fms.2;uc001fmt.2;uc001fmu.2;uc010pgt.1;uc010pgu.1	22889;22889;22889;22889;22889;22889;339403;6746;6746;6746;9181;9181;9181;9181;9181;9181;9181	-42213;-42213;-42213;-42213;-42213;-42213;34921;36282;44209;44209;-25338;0;0;0;0;0;0
chr1	156073451	156073699	249	*	Intron (uc001fnf.1/4000, intron 3 of 12)	1	156084461	156108548	24088	1	4000	uc001fng.2	-10762	ENSG00000160789	LMNA	lamin A/C	uc001fnb.3;uc010pgy.1;uc001fnf.1;uc001fng.2;uc001fnh.3;uc001fni.3;uc009wro.2;uc001fnj.3;uc010pgz.2;uc001fnk.3;uc009wrp.3;uc010pha.1;uc001fna.3;uc010pgx.2;uc001fnc.3;uc001fnl.3;uc001fnm.3;uc001fnn.3;uc009wrq.3;uc001fnd.4	28956;28956;4000;4000;4000;4000;4000;4000;4000;4000;4000;4000;56893;56893;57111;64218;64218;64218;64218;92312	48934;48934;0;0;0;0;0;0;0;-22647;-31205;-31825;-49935;-49935;42485;-46036;-49623;-49623;-49623;-21662
chr1	156076051	156076599	549	*	Intron (uc001fnf.1/4000, intron 3 of 12)	1	156084461	156108548	24088	1	4000	uc001fng.2	-7862	ENSG00000160789	LMNA	lamin A/C	uc001fnb.3;uc010pgy.1;uc001fnf.1;uc001fng.2;uc001fnh.3;uc001fni.3;uc009wro.2;uc001fnj.3;uc010pgz.2;uc001fnk.3;uc009wrp.3;uc010pha.1;uc001fnc.3;uc001fnl.3;uc001fnm.3;uc001fnn.3;uc009wrq.3;uc001fno.3;uc001fnd.4	28956;28956;4000;4000;4000;4000;4000;4000;4000;4000;4000;4000;57111;64218;64218;64218;64218;64218;92312	51534;51534;0;0;0;0;0;0;0;-19747;-28305;-28925;45085;-43136;-46723;-46723;-46723;-47563;-24262
chr1	156083851	156084449	599	*	Promoter (<=1kb)	1	156084461	156108548	24088	1	4000	uc001fng.2	-12	ENSG00000160789	LMNA	lamin A/C	uc001fnf.1;uc001fng.2;uc001fnh.3;uc001fni.3;uc009wro.2;uc001fnj.3;uc010pgz.2;uc001fnk.3;uc009wrp.3;uc010pha.1;uc001fnc.3;uc001fnl.3;uc001fnm.3;uc001fnn.3;uc009wrq.3;uc001fno.3;uc001fnd.4	4000;4000;4000;4000;4000;4000;4000;4000;4000;4000;57111;64218;64218;64218;64218;64218;92312	0;0;0;0;0;0;0;-11897;-20455;-21075;52885;-35286;-38873;-38873;-38873;-39713;-32062
chr1	156096001	156096199	199	*	Promoter (<=1kb)	1	156095951	156109880	13930	1	4000	uc010pgz.2	50	ENSG00000160789	LMNA	lamin A/C	uc001fnf.1;uc001fng.2;uc001fnh.3;uc001fni.3;uc009wro.2;uc001fnj.3;uc010pgz.2;uc001fnk.3;uc009wrp.3;uc010pha.1;uc001fnl.3;uc001fnm.3;uc001fnn.3;uc009wrq.3;uc001fno.3;uc001fnd.4	4000;4000;4000;4000;4000;4000;4000;4000;4000;4000;64218;64218;64218;64218;64218;92312	0;0;0;0;0;0;0;-147;-8705;-9325;-23536;-27123;-27123;-27123;-27963;-44212
chr1	156475051	156475349	299	*	Distal Intergenic	1	156433520	156470634	37115	2	4209	uc001fpe.2	-4417	ENSG00000116604	MEF2D	myocyte enhancer factor 2D	uc001fpf.3;uc009wsb.1;uc001fpb.4;uc001fpc.4;uc001fpd.4;uc009wsa.4;uc001fpe.2	128239;128239;4209;4209;4209;4209;4209	67047;67047;-14660;-4417;-4417;-4417;-4417
chr1	156721001	156721199	199	*	Promoter (<=1kb)	1	156711899	156721085	9187	2	3068	uc009wsd.3	0	ENSG00000143321	HDGF	heparin binding growth factor	uc001fpr.3;uc021pbi.1;uc009wsd.3;uc001fpy.4;uc001fpz.4;uc009wse.3;uc010phr.2;uc009wsf.3;uc001fpu.3;uc001fpv.3;uc001fqa.3;uc001fpw.1;uc001fpx.1;uc001fps.1;uc001fpt.1	1382;1382;3068;3068;3068;3068;3068;3068;51093;51093;5546;79590;79590;81875;81875	-45542;-45393;0;0;0;0;0;0;22738;22738;-16075;-10078;-10078;-23296;-22790
chr1	156721351	156721999	649	*	Promoter (<=1kb)	1	156711899	156721543	9645	2	3068	uc001fpy.4	0	ENSG00000143321	HDGF	heparin binding growth factor	uc001fpr.3;uc021pbi.1;uc009wsd.3;uc001fpy.4;uc001fpz.4;uc009wse.3;uc010phr.2;uc009wsf.3;uc001fpu.3;uc001fpv.3;uc001fqa.3;uc001fpw.1;uc001fpx.1;uc001fps.1;uc001fpt.1	1382;1382;3068;3068;3068;3068;3068;3068;51093;51093;5546;79590;79590;81875;81875	-45892;-45743;0;0;0;0;0;0;23088;23088;-15275;-10428;-10428;-23646;-23140
chr1	159750351	159750449	99	*	Promoter (<=1kb)	1	159750759	159752333	1575	1	54935	uc001ftz.1	-310	ENSG00000158716	DUSP23	dual specificity phosphatase 23	uc010pix.1;uc001fuc.2;uc001fud.4;uc009wsz.1;uc009wta.3;uc001ftz.1;uc001fua.1;uc001fub.1;uc001fue.4	343413;343413;343413;343413;343413;54935;54935;54935;56833	-19852;-19852;-21724;-21761;-21761;-310;-310;-359;-46030
chr1	159880101	159880599	499	*	Distal Intergenic	1	159846346	159869906	23561	2	25790	uc009wtc.1	-10195	ENSG00000213085	CFAP45	cilia and flagella associated protein 45	uc009wtb.3;uc001fui.3;uc001fuj.3;uc001fuk.3;uc009wtc.1;uc001fuh.3;uc001fup.2;uc001fuq.2;uc001fur.2;uc031pqt.1;uc031pqu.1;uc001fun.2;uc010piy.2;uc001fus.3;uc001fut.3;uc009wtd.3	25790;25790;25790;25790;25790;391123;57549;57549;57549;8407;8407;8407;8407;89886;89886;89886	-17006;-10195;-10195;-10195;-10195;-47654;21660;34787;34787;12908;13742;0;0;43445;43445;43445
chr1	159894401	159894499	99	*	Promoter (<=1kb)	1	159887897	159894341	6445	2	8407	uc031pqu.1	-60	ENSG00000158710	TAGLN2	transgelin 2	uc001fuu.3;uc009wtb.3;uc001fui.3;uc001fuj.3;uc001fuk.3;uc009wtc.1;uc001fup.2;uc001fuq.2;uc001fur.2;uc031pqt.1;uc031pqu.1;uc001fun.2;uc010piy.2;uc001fus.3;uc001fut.3;uc009wtd.3	100505633;25790;25790;25790;25790;25790;57549;57549;57549;8407;8407;8407;8407;89886;89886;89886	-36515;-31306;-24495;-24495;-24495;-24495;7760;20887;20887;-894;-60;0;0;29545;29545;29545
chr1	160016301	160016699	399	*	Intron (uc001fuw.2/3766, intron 1 of 1)	1	159997462	160001783	4322	2	93183	uc001fuv.1	-14518	ENSG00000143315	PIGM	phosphatidylinositol glycan anchor biosynthesis class M	uc001fux.1;uc009wte.1;uc001fuy.1;uc001fuw.2;uc001fuv.1;uc001fuz.3;uc009wtf.3;uc001fva.3	3765;3765;3765;3766;93183;93185;93185;93185	-34661;-34661;-34661;0;-14518;51740;51919;51608
chr1	160509901	160510349	449	*	Distal Intergenic	1	160460431	160493052	32622	2	114836	uc009wtm.2	-16849	ENSG00000162739	SLAMF6	SLAM family member 6	uc001fwd.2;uc001fwe.2;uc010pjh.2;uc010pji.2;uc010pjj.2;uc009wtm.2;uc001fwf.4;uc001fwg.4;uc001fwh.4;uc001fwi.4;uc009wtn.3;uc001fwj.3;uc001fwk.3	114836;114836;114836;114836;114836;114836;8832;8832;8832;8832;8832;8832;8832	-16849;-16849;-16849;-16849;-16849;-16849;38957;38957;38957;38957;38957;38957;38957
chr1	160979401	160979699	299	*	Intron (uc010pjv.2/50848, intron 1 of 8)	1	160965001	160990902	25902	2	50848	uc010pjv.2	11203	ENSG00000158769	F11R	F11 receptor	uc001fxh.4;uc009wtw.3;uc010pjx.2;uc001fxk.3;uc001fxl.3;uc001fxm.3;uc009wtx.3;uc001fxn.1;uc010pjv.2;uc009wtt.3;uc001fxf.4;uc010pjw.2;uc031pqv.1;uc001fxi.4;uc001fxj.4	100131187;100131187;100131187;257106;257106;257106;257106;257106;50848;50848;50848;50848;7391;7391;7391	29075;29075;29075;60061;60061;60061;60061;60061;0;0;0;0;35028;36070;36070
chr1	161135601	161135899	299	*	Promoter (<=1kb)	1	161136181	161141010	4830	1	5498	uc001fyg.2	-282	ENSG00000143224	PPOX	protoporphyrinogen oxidase	uc001fyz.1;uc001fza.1;uc010pkc.2;uc010pkd.2;uc021pbv.1;uc001fyv.3;uc010pki.2;uc001fyw.3;uc010pkj.2;uc001fyy.1;uc001fxv.2;uc001fxw.3;uc010pka.2;uc001fxy.2;uc001fyd.4;uc001fxu.3;uc001fyg.2;uc001fyj.2;uc010pkg.1;uc001fyi.2;uc010pkh.1;uc001fyq.2;uc001fyr.2;uc001fys.2;uc001fyp.1;uc009wud.2;uc009wty.3;uc001fxz.3;uc001fya.3;uc001fyb.3;uc010pkb.2;uc001fyt.4;uc001fyu.2	2207;2207;27005;27005;27005;4720;4720;4720;4720;4720;4817;4817;4817;4817;51506;5202;5498;5498;5498;5498;5498;8703;8703;8703;8703;8703;9191;9191;9191;9191;9191;9507;9507	-49188;-49188;6347;6347;976;-33206;-36038;-36038;-36038;-37328;47739;47739;47694;47693;12067;-47735;0;0;0;0;0;11859;11859;11859;9119;11859;-34964;-33345;-33123;-33123;-33123;32946;32946
chr1	161136251	161136549	299	*	Promoter (<=1kb)	1	161136181	161147801	11621	1	5498	uc010pkh.1	70	ENSG00000143224	PPOX	protoporphyrinogen oxidase	uc001fyz.1;uc001fza.1;uc010pkc.2;uc010pkd.2;uc021pbv.1;uc001fyv.3;uc010pki.2;uc001fyw.3;uc010pkj.2;uc001fyy.1;uc001fxv.2;uc001fxw.3;uc010pka.2;uc001fxy.2;uc001fyd.4;uc001fxu.3;uc001fyg.2;uc001fyj.2;uc010pkg.1;uc001fyi.2;uc010pkh.1;uc001fyq.2;uc001fyr.2;uc001fys.2;uc001fyp.1;uc009wud.2;uc009wty.3;uc001fxz.3;uc001fya.3;uc001fyb.3;uc010pkb.2;uc001fyt.4;uc001fyu.2	2207;2207;27005;27005;27005;4720;4720;4720;4720;4720;4817;4817;4817;4817;51506;5202;5498;5498;5498;5498;5498;8703;8703;8703;8703;8703;9191;9191;9191;9191;9191;9507;9507	-48538;-48538;6997;6997;1626;-32556;-35388;-35388;-35388;-36678;48389;48389;48344;48343;12717;-48385;0;0;0;0;0;11209;11209;11209;8469;11209;-35614;-33995;-33773;-33773;-33773;32296;32296
chr1	161420201	161420799	599	*	Exon (uc021pcj.1/uc021pcj.1, exon 1 of 1)	1	161475205	161489360	14156	1	2212	uc001gam.3	-54406	ENSG00000143226	FCGR2A	Fc gamma receptor IIa	NA	NA	NA
chr1	161424201	161425149	949	*	Exon (uc021pck.1/uc021pck.1, exon 1 of 1)	1	161475205	161489360	14156	1	2212	uc001gam.3	-50056	ENSG00000143226	FCGR2A	Fc gamma receptor IIa	NA	NA	NA
chr1	161430601	161431149	549	*	Distal Intergenic	1	161475205	161489360	14156	1	2212	uc001gam.3	-44056	ENSG00000143226	FCGR2A	Fc gamma receptor IIa	uc001gam.3;uc001gan.3;uc021pcz.2;uc021pda.2	2212;2212;2212;2212	-44056;-44056;-44056;-44056
chr1	161432701	161433549	849	*	Exon (uc021pcs.1/uc021pcs.1, exon 1 of 1)	1	161475205	161489360	14156	1	2212	uc001gam.3	-41656	ENSG00000143226	FCGR2A	Fc gamma receptor IIa	uc001gam.3;uc001gan.3;uc021pcz.2;uc021pda.2	2212;2212;2212;2212	-41656;-41656;-41656;-41656
chr1	161433651	161434299	649	*	Distal Intergenic	1	161475205	161489360	14156	1	2212	uc001gam.3	-40906	ENSG00000143226	FCGR2A	Fc gamma receptor IIa	uc001gam.3;uc001gan.3;uc021pcz.2;uc021pda.2	2212;2212;2212;2212	-40906;-40906;-40906;-40906
chr1	161500751	161501049	299	*	Exon (uc021pde.1/uc021pde.1, exon 1 of 1)	1	161494036	161496687	2652	1	3310	uc001gaq.3	6715	ENSG00000173110	HSPA6	heat shock protein family A (Hsp70) member 6	uc001gam.3;uc001gan.3;uc021pcz.2;uc021pda.2;uc001gar.3;uc001gas.3;uc001gat.4;uc009wuh.3;uc009wui.3;uc001gaq.3	2212;2212;2212;2212;2214;2214;2214;2214;2214;3310	25546;25546;25546;25546;18769;18769;19364;19364;19364;6715
chr1	161509901	161510299	399	*	Exon (uc021pdg.1/uc021pdg.1, exon 1 of 1)	1	161511551	161519818	8268	2	2214	uc001gar.3	9519	ENSG00000203747	FCGR3A	Fc gamma receptor IIIa	uc001gam.3;uc001gan.3;uc021pcz.2;uc021pda.2;uc001gar.3;uc001gas.3;uc001gat.4;uc009wuh.3;uc009wui.3;uc001gaq.3;uc009wuj.2;uc009wuk.2;uc021pdh.1;uc021pdi.2	2212;2212;2212;2212;2214;2214;2214;2214;2214;3310;9103;9103;9103;9103	34696;34696;34696;34696;9519;9519;10114;10114;10114;15865;-40830;-40830;-40830;-40830
chr1	165615301	165615499	199	*	Intron (uc001gdf.3/4259, intron 1 of 5)	1	165600110	165625372	25263	1	4259	uc001gdf.3	15191	ENSG00000143198	MGST3	microsomal glutathione S-transferase 3	uc010pky.1;uc010pkz.1;uc001gdh.1;uc010pla.1;uc001gdf.3	223;223;223;223;4259	52324;52333;52401;52324;0
chr1	167597101	167597649	549	*	Promoter (1-2kb)	1	167599474	167675486	76013	1	92241	uc001gem.3	-1825	ENSG00000198771	RCSD1	RCSD domain containing 1	uc001gem.3;uc010pli.2	92241;92241	-1825;-1825
chr1	173837601	173838049	449	*	Promoter (<=1kb)	1	173837493	173855774	18282	1	84614	uc009wwp.1	108	ENSG00000185278	ZBTB37	zinc finger and BTB domain containing 37	uc021pfa.1;uc009wwi.1;uc009wwk.1;uc009wwj.1;uc001gjl.2;uc001gjn.1;uc001gjt.3;uc001gjh.2;uc001gjj.3;uc001gjk.3;uc001gjo.1;uc009wwo.1;uc009wwn.1;uc009wwm.1;uc009wwl.3;uc001gjp.1;uc001gjq.4;uc001gjr.2;uc009wwp.1;uc001gje.4;uc001gjf.4;uc001gjg.4	100506046;26769;26770;26774;26802;26806;462;55157;60674;60674;619498;692195;692196;692197;692198;84614;84614;84614;84614;91687;91687;91687	5215;-4246;-3033;-3560;-4018;-2435;48467;43804;-476;-476;-718;-1525;-1748;-2092;-2777;0;0;0;0;-44331;-43824;-43824
chr1	178994901	178995199	299	*	Promoter (<=1kb)	1	178995074	179045702	50629	1	9917	uc001gmc.3	0	ENSG00000116199	FAM20B	FAM20B glycosaminoglycan xylosylkinase	uc001gmc.3	9917	0
chr1	182269101	182269599	499	*	Distal Intergenic	1	182350839	182354717	3879	2	2752	uc010pnt.2	85118	ENSG00000135821	GLUL	glutamate-ammonia ligase	NA	NA	NA
chr1	185253801	185254349	549	*	Intron (uc001grg.4/54823, intron 18 of 18)	1	185265522	185270846	5325	2	10625	uc001gri.3	16497	ENSG00000116679	IVNS1ABP	influenza virus NS1A binding protein	uc001grn.4;uc001gri.3;uc001grj.3;uc009wyj.3;uc001grl.3;uc009wyk.3;uc001grm.3;uc001grg.4;uc001grh.4	100288079;10625;10625;10625;10625;10625;10625;54823;54823	49822;16497;21283;26105;32112;32112;16497;0;0
chr1	198048801	198048949	149	*	Distal Intergenic	1	198126108	198291548	165441	1	140609	uc001gun.4	-77159	ENSG00000151414	NEK7	NIMA related kinase 7	NA	NA	NA
chr1	200638501	200638849	349	*	Promoter (<=1kb)	1	200610119	200639126	29008	2	83479	uc010ppl.1	277	ENSG00000118197	DDX59	DEAD-box helicase 59	uc010ppl.1;uc009wzk.3;uc010ppk.1	83479;83479;9928	0;0;-48639
chr1	202045201	202045449	249	*	Distal Intergenic	1	202092029	202098634	6606	1	9283	uc001gxj.3	-46580	ENSG00000170075	GPR37L1	G protein-coupled receptor 37 like 1	uc001gxj.3	9283	-46580
chr1	202776451	202776799	349	*	Promoter (<=1kb)	1	202698835	202776427	77593	2	10765	uc001gyg.1	-24	ENSG00000117139	KDM5B	lysine demethylase 5B	uc031prp.1;uc031prq.1;uc001gyf.3;uc009xag.3;uc001gyg.1;uc021php.1	100506696;100506696;10765;10765;10765;641515	-3275;-3275;0;0;-24;-17530
chr1	203275301	203275649	349	*	Promoter (<=1kb)	1	203274664	203278729	4066	1	7832	uc001gzq.3	637	ENSG00000159388	BTG2	BTG anti-proliferation factor 2	uc001gzm.1;uc001gzr.3;uc001gzp.2;uc009xao.2;uc001gzq.3	1118;2331;730227;730227;7832	-33364;44640;-848;-848;0
chr1	203651501	203651899	399	*	Promoter (<=1kb)	1	203651870	203702757	50888	1	493	uc009xaq.3	0	ENSG00000058668	ATP2B4	ATPase plasma membrane Ca2+ transporting 4	uc001gzv.3;uc001gzw.3;uc009xaq.3;uc001gzx.3;uc009xar.3;uc001gzy.1;uc031prr.1	493;493;493;493;493;677843;84719	0;0;0;-39707;-39707;-46810;-47806
chr1	204476801	204477099	299	*	Distal Intergenic	1	204485507	204518786	33280	1	4194	uc010pqw.2	-8408	ENSG00000198625	MDM4	MDM4 regulator of p53	uc010pqw.2;uc010pqx.2;uc001hay.2;uc001hba.3;uc001hbb.3;uc021phx.1;uc010pqy.2;uc001hbc.3;uc001hbd.2;uc009xbe.1;uc001haw.3;uc010pqv.2;uc001hax.1;uc009xbd.1	4194;4194;4194;4194;4194;4194;4194;4194;4194;4194;5287;5287;5287;5287	-8408;-8408;-8408;-8408;-8408;-8408;-8408;-8408;-8408;-17269;-17327;-17327;-12949;-17327
chr1	205126301	205126499	199	*	Exon (uc001hbw.3/25778, exon 10 of 13)	1	205129134	205143643	14510	2	25778	uc001hby.1	17144	ENSG00000133059	DSTYK	dual serine/threonine and tyrosine protein kinase	uc001hbw.3;uc001hbx.3;uc001hby.1;uc010prd.2;uc001hbu.2;uc001hbv.2;uc010pre.2	25778;25778;25778;5929;5929;5929;5929	0;0;17144;-40885;-35151;-35151;-35151
chr1	205718451	205718849	399	*	Promoter (<=1kb)	1	205681947	205719372	37426	2	64710	uc001hdb.3	523	ENSG00000069275	NUCKS1	nuclear casein kinase and cyclin dependent kinase substrate 1	uc001hdg.1;uc001hdh.1;uc001hdb.3;uc001hde.4;uc001hdf.4;uc009xbp.3;uc009xbq.3;uc010prr.2	254428;254428;64710;8934;8934;8934;8934;8934	46147;63312;0;25761;25761;25761;25761;25761
chr1	207020901	207021149	249	*	Distal Intergenic	1	207010006	207013959	3954	1	29949	uc010prx.1	10895	ENSG00000142224	IL19	interleukin 19	uc001hes.2;uc001heu.2;uc001hev.2;uc001hew.2;uc001hex.2;uc001heo.3;uc001hep.3;uc010prx.1;uc001her.3;uc009xby.3	11009;11009;11009;11009;11009;29949;29949;29949;50604;50604	-49639;-49639;-49639;-49639;-49639;48686;18679;10895;-18005;-18019
chr1	207197551	207198099	549	*	Intron (uc001hfd.2/79098, intron 3 of 3)	1	207191866	207206101	14236	2	79098	uc001hfd.2	8002	ENSG00000182795	C1orf116	chromosome 1 open reading frame 116	uc010psc.2;uc001hfg.3;uc001hfh.3;uc009xcc.3;uc010psd.2;uc001hfe.1;uc001hff.1;uc001hfd.2;uc009xcb.1	5208;5208;5208;5208;5208;55432;55432;79098;79098	-9662;-28521;-28521;-29947;-40250;26323;28226;0;0
chr1	207494401	207495249	849	*	Promoter (<=1kb)	1	207494817	207534311	39495	1	1604	uc001hfq.4	0	ENSG00000196352	CD55	CD55 molecule (Cromer blood group)	uc001hfq.4;uc001hfr.4;uc009xce.3;uc009xcf.3;uc010psf.2;uc031prz.1	1604;1604;1604;1604;1604;1604	0;0;0;0;0;-2655
chr1	207536751	207536999	249	*	Distal Intergenic	1	207497904	207511004	13101	1	1604	uc031prz.1	38847	ENSG00000196352	CD55	CD55 molecule (Cromer blood group)	uc001hfq.4;uc001hfr.4;uc009xce.3;uc009xcf.3;uc010psf.2;uc031prz.1	1604;1604;1604;1604;1604;1604	0;0;0;0;0;38847
chr1	207693451	207693749	299	*	Intron (uc009xcj.1/1378, intron 4 of 12)	1	207669473	207815110	145638	1	1378	uc021pij.1	23978	ENSG00000203710	CR1	complement C3b/C4b receptor 1 (Knops blood group)	uc010psg.1;uc009xcj.1;uc009xck.1;uc009xcl.1;uc001hfx.3;uc001hfy.3;uc021pij.1;uc001hfv.3;uc001hfw.3;uc009xch.3;uc009xci.1	1378;1378;1378;1378;1378;1378;1378;1380;1380;1380;1380	23978;0;0;0;0;0;0;65806;65806;65806;49109
chr1	208046051	208046249	199	*	Distal Intergenic	1	208059883	208063837	3955	2	947	uc001hgv.1	17588	ENSG00000174059	CD34	CD34 molecule	uc001hgv.1;uc001hgw.1;uc001hgx.1;uc010psj.1	947;947;947;947	17588;38434;38434;38434
chr1	208137401	208137949	549	*	Distal Intergenic	1	208059883	208084683	24801	2	947	uc010psj.1	-52718	ENSG00000174059	CD34	CD34 molecule	NA	NA	NA
chr1	209975551	209975749	199	*	Intron (uc001hhq.2/3664, intron 1 of 8)	1	209958968	209979520	20553	2	3664	uc001hhq.2	3771	ENSG00000117595	IRF6	interferon regulatory factor 6	uc001hhp.1;uc001hhr.2;uc009xcu.2;uc001hhq.2;uc010psm.2;uc001hhm.2;uc001hhn.3;uc001hho.3;uc009xcr.3	148304;27042;27042;3664;3664;80342;80342;80342;80342	-17661;-25563;-25563;0;0;46157;46157;46157;43708
chr1	211432251	211432799	549	*	Promoter (<=1kb)	1	211432708	211486303	53596	1	55758	uc010psv.1	0	ENSG00000117625	RCOR3	REST corepressor 3	uc010psv.1;uc001hie.3;uc001hif.3;uc010psw.2;uc001hig.3	55758;55758;55758;55758;55758	0;0;0;0;-490
chr1	211688651	211688849	199	*	Distal Intergenic	1	211649864	211666259	16396	2	343035	uc009xda.2	-22392	ENSG00000198570	RD3	RD3 regulator of GUCY2D	uc001him.2;uc001hin.2;uc009xda.2	343035;343035;343035	-22392;-22392;-22392
chr1	216887101	216887549	449	*	Intron (uc001hkw.2/2104, intron 1 of 6)	1	216676588	216896814	220227	2	2104	uc001hkw.2	9265	ENSG00000196482	ESRRG	estrogen related receptor gamma	uc001hkw.2;uc001hkx.2;uc001hle.2;uc009xdo.2;uc021piz.1;uc001hky.1;uc009xdp.1;uc001hkz.2;uc010puc.2;uc001hla.2;uc001hlb.2;uc010pud.2;uc021pja.1;uc001hlc.1;uc001hld.1	2104;2104;2104;2104;2104;2104;2104;2104;2104;2104;2104;2104;2104;2104;2104	0;0;0;0;0;0;0;0;0;0;0;0;0;0;0
chr1	217804451	217804799	349	*	Promoter (<=1kb)	1	217804695	217955664	150970	1	128153	uc009xdr.1	0	ENSG00000162814	SPATA17	spermatogenesis associated 17	uc009xdr.1;uc001hlh.1;uc001hlf.1;uc001hlg.4	128153;128153;55105;55105	0;0;-42;-42
chr1	220080251	220080749	499	*	Intron (uc021pjd.1/26828, intron 1 of 1)	1	220087606	220092372	4767	2	55532	uc001hlv.3	11623	ENSG00000196660	SLC30A10	solute carrier family 30 member 10	uc021pjd.1;uc001hlu.1;uc001hlv.3;uc001hlw.3;uc001hlx.4	26828;55532;55532;55532;55532	0;0;11623;21244;21244
chr1	224058201	224058699	499	*	Distal Intergenic	1	223967595	224033674	66080	2	7159	uc010pvb.2	-24527	ENSG00000143514	TP53BP2	tumor protein p53 binding protein 2	uc001hod.3;uc010pvb.2	7159;7159	-24527;-24527
chr1	224202801	224203399	599	*	Distal Intergenic	1	224301789	224349749	47961	1	23219	uc001hoh.3	-98390	ENSG00000143756	FBXO28	F-box protein 28	NA	NA	NA
chr1	224691051	224691549	499	*	Distal Intergenic	1	224616999	224622001	5003	2	80232	uc021pjt.1	-69050	ENSG00000162923	WDR26	WD repeat domain 26	NA	NA	NA
chr1	225614551	225615799	1249	*	Promoter (<=1kb)	1	225589204	225615815	26612	2	3930	uc001hoy.3	16	ENSG00000143815	LBR	lamin B receptor	uc001how.2;uc001hox.2;uc001hoy.3;uc001hoz.3	127602;127602;3930;3930	497195;186256;0;0
chr1	226116151	226116449	299	*	Distal Intergenic	1	226107577	226112040	4464	2	29920	uc031psk.1	-4111	ENSG00000143811	PYCR2	pyrroline-5-carboxylate reductase 2	uc001hpo.3;uc010pvj.3;uc009xej.2;uc001hpq.4;uc031psk.1;uc001hps.1;uc001hpt.2;uc009xek.2;uc010pvk.2;uc001hpm.2	10637;10637;10637;29920;29920;29920;7044;7044;7044;9725	-39305;-4111;-39305;-4111;-4111;-5703;12634;12634;12634;-45731
chr1	226186751	226187399	649	*	Promoter (<=1kb)	1	226170403	226187066	16664	2	163859	uc001hpu.4	0	ENSG00000143751	SDE2	SDE2 telomere maintenance homolog	uc001hpu.4	163859	0
chr1	226190551	226190899	349	*	Distal Intergenic	1	226170403	226187066	16664	2	163859	uc001hpu.4	-3485	ENSG00000143751	SDE2	SDE2 telomere maintenance homolog	uc001hpu.4	163859	0
chr1	226249801	226250049	249	*	Promoter (<=1kb)	1	226250408	226254301	3894	1	3020	uc010pvl.2	-359	ENSG00000163041	H3-3A	H3.3 histone A	uc010pvl.2;uc001hpw.3;uc021pjv.1	3020;3020;440926	-359;-359;-1629
chr1	226250201	226250399	199	*	Promoter (<=1kb)	1	226250408	226254301	3894	1	3020	uc010pvl.2	-9	ENSG00000163041	H3-3A	H3.3 histone A	uc010pvl.2;uc001hpw.3;uc021pjv.1	3020;3020;440926	-9;-9;-1279
chr1	227506251	227506399	149	*	Promoter (<=1kb)	1	227177566	227505826	328261	2	8476	uc010pvs.2	-425	ENSG00000143776	CDC42BPA	CDC42 binding protein kinase alpha	uc001hqr.3;uc001hqs.3;uc009xes.3;uc010pvs.2	8476;8476;8476;8476	-425;-425;-425;-425
chr1	227584201	227584649	449	*	Intron (uc001hqv.3/uc001hqv.3, intron 2 of 3)	1	227177566	227505826	328261	2	8476	uc010pvs.2	-78375	ENSG00000143776	CDC42BPA	CDC42 binding protein kinase alpha	NA	NA	NA
chr1	228700951	228701299	349	*	Distal Intergenic	1	228675068	228683889	8822	1	149603	uc001htb.3	25883	ENSG00000168159	RNF187	ring finger protein 187	uc001htb.3	149603	25883
chr1	228751301	228752199	899	*	Distal Intergenic	1	228780394	228788159	7766	1	574029	uc001htd.2	-28195	NA	DUSP5P1	dual specificity phosphatase 5 pseudogene 1	uc001htd.2;uc021pkj.1	574029;58480	0;0
chr1	228759801	228760149	349	*	Distal Intergenic	1	228780394	228788159	7766	1	574029	uc001htd.2	-20245	NA	DUSP5P1	dual specificity phosphatase 5 pseudogene 1	uc001htd.2;uc021pkj.1	574029;58480	0;0
chr1	228760701	228760799	99	*	Distal Intergenic	1	228780394	228788159	7766	1	574029	uc001htd.2	-19595	NA	DUSP5P1	dual specificity phosphatase 5 pseudogene 1	uc001htd.2;uc021pkj.1	574029;58480	0;0
chr1	228763051	228763349	299	*	Distal Intergenic	1	228780394	228788159	7766	1	574029	uc001htd.2	-17045	NA	DUSP5P1	dual specificity phosphatase 5 pseudogene 1	uc001htd.2;uc021pkj.1	574029;58480	0;0
chr1	228765251	228765499	249	*	Distal Intergenic	1	228780394	228788159	7766	1	574029	uc001htd.2	-14895	NA	DUSP5P1	dual specificity phosphatase 5 pseudogene 1	uc001htd.2;uc021pkj.1	574029;58480	0;0
chr1	228777001	228777899	899	*	Distal Intergenic	1	228780394	228788159	7766	1	574029	uc001htd.2	-2495	NA	DUSP5P1	dual specificity phosphatase 5 pseudogene 1	uc001htd.2;uc021pkj.1	574029;58480	0;0
chr1	228778551	228780199	1649	*	Promoter (<=1kb)	1	228780394	228788159	7766	1	574029	uc001htd.2	-195	NA	DUSP5P1	dual specificity phosphatase 5 pseudogene 1	uc001htd.2;uc021pkj.1	574029;58480	0;0
chr1	228780651	228782449	1799	*	Promoter (<=1kb)	1	228780394	228882416	102023	1	58480	uc021pkj.1	257	ENSG00000116574	RHOU	ras homolog family member U	uc001htd.2;uc021pkj.1	574029;58480	0;0
chr1	229690601	229691099	499	*	Intron (uc001htp.4/23456, intron 1 of 12)	1	229652329	229694442	42114	2	23456	uc001htp.4	3343	ENSG00000135776	ABCB10	ATP binding cassette subfamily B member 10	uc001htp.4;uc001htq.3;uc001htr.3;uc001htn.3	23456;27097;27097;55746	0;70695;70695;-46513
chr1	229693401	229694749	1349	*	Promoter (<=1kb)	1	229652329	229694442	42114	2	23456	uc001htp.4	0	ENSG00000135776	ABCB10	ATP binding cassette subfamily B member 10	uc001htp.4;uc001htq.3;uc001htr.3;uc001htn.3	23456;27097;27097;55746	0;67045;67045;-49313
chr1	230202601	230202799	199	*	Promoter (<=1kb)	1	230202956	230410310	207355	1	2590	uc010pvz.1	-157	ENSG00000143641	GALNT2	polypeptide N-acetylgalactosaminyltransferase 2	uc010pvy.1;uc010pvz.1;uc010pwa.1	2590;2590;2590	0;0;0
chr1	230203651	230204149	499	*	Promoter (<=1kb)	1	230202956	230417875	214920	1	2590	uc010pwa.1	695	ENSG00000143641	GALNT2	polypeptide N-acetylgalactosaminyltransferase 2	uc010pvy.1;uc010pvz.1;uc010pwa.1	2590;2590;2590	0;0;0
chr1	230262751	230263249	499	*	Intron (uc010pvy.1/2590, intron 1 of 15)	1	230202956	230417875	214920	1	2590	uc010pwa.1	59795	ENSG00000143641	GALNT2	polypeptide N-acetylgalactosaminyltransferase 2	uc010pvy.1;uc010pvz.1;uc010pwa.1	2590;2590;2590	0;0;0
chr1	230279251	230279599	349	*	Intron (uc010pvy.1/2590, intron 1 of 15)	1	230202956	230417875	214920	1	2590	uc010pwa.1	76295	ENSG00000143641	GALNT2	polypeptide N-acetylgalactosaminyltransferase 2	uc010pvy.1;uc010pvz.1;uc010pwa.1	2590;2590;2590	0;0;0
chr1	231181851	231182149	299	*	Distal Intergenic	1	231154704	231175995	21292	2	375061	uc001hui.2	-5856	ENSG00000182118	FAM89A	family with sequence similarity 89 member A	uc021pkk.1;uc001hui.2;uc009xfl.1;uc001huh.3	100302132;375061;64801;64801	-26181;-5856;67028;67028
chr1	232861051	232861199	149	*	Distal Intergenic	1	232940638	232946092	5455	1	54627	uc001hvh.2	-79439	ENSG00000212916	MAP10	microtubule associated protein 10	NA	NA	NA
chr1	234626951	234627199	249	*	Distal Intergenic	1	234527059	234614849	87791	2	6894	uc001hwd.3	-12102	ENSG00000059588	TARBP1	TAR (HIV-1) RNA binding protein 1	uc001hwe.3;uc001hwd.3	100506795;6894	40326;-12102
chr1	234693951	234694599	649	*	Distal Intergenic	1	234663637	234667525	3889	2	100506795	uc001hwe.3	-26426	ENSG00000231768	LINC01354	long intergenic non-protein coding RNA 1354	uc001hwe.3;uc009xfw.3;uc001hwf.3;uc001hwg.3	100506795;359948;359948;359948	-26426;49261;50672;50672
chr1	234859701	234860249	549	*	Promoter (<=1kb)	1	234859789	234867390	7602	1	100506810	uc001hwj.2	0	ENSG00000227630	LINC01132	long intergenic non-protein coding RNA 1132	uc001hwj.2	100506810	0
chr1	234917251	234917599	349	*	Distal Intergenic	1	234859789	234867390	7602	1	100506810	uc001hwj.2	57462	ENSG00000227630	LINC01132	long intergenic non-protein coding RNA 1132	uc001hwj.2	100506810	0
chr1	235012051	235012449	399	*	Distal Intergenic	1	234859789	234867390	7602	1	100506810	uc001hwj.2	152262	ENSG00000227630	LINC01132	long intergenic non-protein coding RNA 1132	NA	NA	NA
chr1	244998451	244998949	499	*	Promoter (<=1kb)	1	244998639	245008359	9721	1	116228	uc001iar.3	0	ENSG00000203667	COX20	cytochrome c oxidase assembly factor COX20	uc001iar.3;uc001ias.3;uc001iat.3;uc001iav.3;uc001iay.1;uc001iaz.1;uc001iba.1	116228;116228;116228;284702;3192;3192;3192	0;0;0;11294;25444;0;0
chr1	245026201	245026649	449	*	Promoter (1-2kb)	1	245013602	245027827	14226	2	3192	uc001iaz.1	1178	ENSG00000153187	HNRNPU	heterogeneous nuclear ribonucleoprotein U	uc001iar.3;uc001ias.3;uc001iat.3;uc001iav.3;uc001iay.1;uc001iaz.1;uc001iba.1	116228;116228;116228;284702;3192;3192;3192	0;0;0;-15958;-1808;0;0
chr1	249176751	249177099	349	*	Distal Intergenic	1	249200442	249213345	12904	1	267002	uc001ifg.3	-23343	ENSG00000185220	PGBD2	piggyBac transposable element derived 2	uc001ifg.3;uc001ifh.3;uc009xhd.3;uc001iez.2;uc031pta.1;uc001ifb.2;uc010pzr.2;uc001ifc.2;uc001iff.2;uc001iex.3	267002;267002;267002;55657;55657;55657;55657;55657;55657;79894	-23343;-23343;-23343;-26517;-24487;-23839;-23626;-23436;-23436;44221
chr1	249232801	249233099	299	*	Distal Intergenic	1	249200442	249213345	12904	1	267002	uc009xhd.3	32359	ENSG00000185220	PGBD2	piggyBac transposable element derived 2	uc001ifg.3;uc001ifh.3;uc009xhd.3	267002;267002;267002	32359;32359;32359
chr1	249234301	249235049	749	*	Distal Intergenic	1	249200442	249213345	12904	1	267002	uc009xhd.3	33859	ENSG00000185220	PGBD2	piggyBac transposable element derived 2	uc001ifg.3;uc001ifh.3;uc009xhd.3	267002;267002;267002	33859;33859;33859
chr1	249239951	249240599	649	*	Distal Intergenic	1	249200442	249213345	12904	1	267002	uc009xhd.3	39509	ENSG00000185220	PGBD2	piggyBac transposable element derived 2	uc001ifg.3;uc001ifh.3;uc009xhd.3	267002;267002;267002	39509;39509;39509
chr2	1865551	1865699	149	*	Intron (uc002qxd.3/23040, intron 18 of 24)	2	1792885	1846658	53774	2	23040	uc010ewk.3	-18893	ENSG00000186487	MYT1L	myelin transcription factor 1 like	uc010ewk.3;uc002qxd.3;uc002qxe.3;uc010ewl.2	23040;23040;23040;23040	-18893;0;0;61336
chr2	3652951	3653149	199	*	Promoter (<=1kb)	2	3653642	3692234	38593	1	78989	uc010ewp.4	-493	ENSG00000118004	COLEC11	collectin subfamily member 11	uc002qxu.3;uc002qxv.3;uc021vdo.1;uc002qxs.3;uc002qxt.3;uc002qxw.3;uc002qxx.3;uc002qxy.3;uc002qxz.4;uc002qya.4;uc002qyb.4;uc002qyc.4;uc010ewo.4;uc031rnm.1;uc031rnn.1;uc010ewp.4;uc010ewq.4;uc010ewr.4;uc010ews.4	100506054;100506054;100506054;246243;246243;6201;6201;6201;78989;78989;78989;78989;78989;78989;78989;78989;78989;78989;78989	46975;46975;46975;-47072;-47011;30098;29769;27570;0;0;0;0;0;0;0;-493;-493;-493;-493
chr2	6987551	6987749	199	*	Intron (uc002qyn.2/129607, intron 2 of 2)	2	6980684	6991814	11131	2	129607	uc002qyn.2	4065	ENSG00000134326	CMPK2	cytidine/uridine monophosphate kinase 2	uc002qyn.2;uc010yis.2;uc002qyo.4;uc010ewv.4;uc031rno.1;uc002qyp.1	129607;129607;129607;129607;129607;91543	0;0;18201;18201;19017;-30047
chr2	8756001	8756249	249	*	Distal Intergenic	2	8822113	8824583	2471	1	3398	uc002qza.3	-65864	ENSG00000115738	ID2	inhibitor of DNA binding 2	NA	NA	NA
chr2	9034501	9034699	199	*	Intron (uc002qzg.1/129642, intron 4 of 12)	2	8874785	8977755	102971	2	57498	uc010yiw.1	-56746	ENSG00000134313	KIDINS220	kinase D interacting substrate 220	uc002qzg.1;uc010yix.1	129642;129642	0;0
chr2	9983801	9984099	299	*	Promoter (<=1kb)	2	9983571	10074545	90975	1	9014	uc010yja.2	230	ENSG00000115750	TAF1B	TATA-box binding protein associated factor, RNA polymerase I subunit B	uc010exc.2;uc002qzy.4;uc002qzz.3;uc010exd.3;uc010yja.2	9014;9014;9014;9014;9014	0;0;0;0;0
chr2	10169101	10169399	299	*	Distal Intergenic	2	10183682	10194963	11282	1	8462	uc002raf.1	-14283	ENSG00000172059	KLF11	KLF transcription factor 11	uc002rag.2;uc002raa.3;uc002rab.3;uc002rad.3;uc010yjb.2;uc002raf.1;uc021vdq.1;uc010yjc.2	192668;29841;29841;29841;29841;8462;8462;8462	51139;77309;77309;77309;77309;0;0;0
chr2	10183251	10183649	399	*	Promoter (<=1kb)	2	10183682	10194963	11282	1	8462	uc002raf.1	-33	ENSG00000172059	KLF11	KLF transcription factor 11	uc002rag.2;uc002raa.3;uc002rab.3;uc002rad.3;uc010yjb.2;uc002raf.1;uc021vdq.1;uc010yjc.2	192668;29841;29841;29841;29841;8462;8462;8462	36889;91459;91459;91459;91459;0;0;0
chr2	10183951	10184399	449	*	Promoter (<=1kb)	2	10183956	10194963	11008	1	8462	uc021vdq.1	0	ENSG00000172059	KLF11	KLF transcription factor 11	uc002rag.2;uc002raa.3;uc002rab.3;uc002rad.3;uc010yjb.2;uc002raf.1;uc021vdq.1;uc010yjc.2	192668;29841;29841;29841;29841;8462;8462;8462	36139;92159;92159;92159;92159;0;0;0
chr2	10587601	10588799	1199	*	Promoter (<=1kb)	2	10580508	10587906	7399	2	4953	uc010exg.1	0	ENSG00000115758	ODC1	ornithine decarboxylase 1	uc021vdu.1;uc002raj.4;uc002ral.3;uc010exe.3;uc031rnp.1;uc031rnq.1;uc010exf.3;uc010exg.1;uc002rao.1;uc010yjd.1;uc010exh.1	100302743;3241;3241;3241;3241;3241;3241;4953;4953;4953;4953	-626;144571;143775;123128;117312;78797;78711;0;0;0;0
chr2	11538851	11539049	199	*	Intron (uc031rnr.1/100874055, intron 1 of 2)	2	11534107	11543203	9097	1	100874055	uc031rnr.1	4744	ENSG00000224177	LINC00570	long intergenic non-protein coding RNA 570	uc031rnr.1;uc002rbe.4;uc002rbf.4;uc002rbg.4;uc002rbh.4;uc002rbi.4;uc002rbj.2;uc010yjl.3	100874055;1876;1876;1876;1876;1876;1876;1876	0;67254;67254;67254;67254;67254;67254;67254
chr2	12108151	12108549	399	*	Distal Intergenic	2	11977059	11977112	54	2	100422996	uc021vea.1	-131039	ENSG00000265172	MIR4262	microRNA 4262	NA	NA	NA
chr2	12596501	12596849	349	*	Intron (uc002rbu.1/uc002rbu.1, intron 4 of 5)	2	12856998	12882858	25861	1	28951	uc002rbv.4	-260149	ENSG00000071575	TRIB2	tribbles pseudokinase 2	NA	NA	NA
chr2	16931401	16931799	399	*	Distal Intergenic	2	16730730	16847134	116405	2	81553	uc002rck.2	-84267	ENSG00000197872	CYRIA	CYFIP related Rac1 interactor A	NA	NA	NA
chr2	20101701	20101999	299	*	Promoter (<=1kb)	2	20096514	20101744	5231	2	130502	uc002rdg.3	0	ENSG00000183891	TTC32	tetratricopeptide repeat domain 32	uc002rdg.3;uc002rdd.2;uc002rde.2;uc002rdf.3;uc002rdh.3;uc002rdi.3;uc002rdj.3;uc010ext.3;uc002rdk.4	130502;400946;400946;400946;57539;57539;57539;57539;57539	0;33086;33086;33086;73425;87885;87885;87885;51740
chr2	21451301	21451649	349	*	Distal Intergenic	2	21224301	21266945	42645	2	338	uc002red.3	-184356	ENSG00000084674	APOB	apolipoprotein B	NA	NA	NA
chr2	24234301	24234499	199	*	Promoter (1-2kb)	2	24235769	24241589	5821	1	388931	uc010exz.2	-1270	ENSG00000205639	MFSD2B	MFSD2 lysolipid transporter B, sphingolipid	uc002rem.3;uc010exy.3;uc002ren.3;uc010ykj.2;uc002rer.3;uc002res.3;uc002ret.3;uc002reo.2;uc010exz.2;uc002rep.2;uc010eya.2	165324;165324;165324;165324;2281;2281;2281;388931;388931;80304;80304	84146;84146;70925;70925;-38085;-38085;-38085;0;-1270;35797;35797
chr2	25445701	25446049	349	*	Distal Intergenic	2	25455830	25475184	19355	2	1788	uc002rgb.4	29135	ENSG00000119772	DNMT3A	DNA methyltransferase 3 alpha	uc002rgb.4;uc002rgc.4;uc002rgd.4;uc010eyi.4	1788;1788;1788;1788	29135;118735;119410;119410
chr2	30369401	30369799	399	*	Promoter (<=1kb)	2	30369750	30383399	13650	1	51646	uc002rmz.4	0	ENSG00000119801	YPEL5	yippee like 5	uc002rmz.4;uc002rna.4;uc002rnb.4;uc002rnc.4;uc010ezn.3;uc002rnd.3	51646;51646;51646;51646;51646;51646	0;0;0;0;0;-583
chr2	30414651	30414999	349	*	Distal Intergenic	2	30454397	30482899	28503	1	81606	uc002rne.2	-39398	ENSG00000213626	LBH	LBH regulator of WNT signaling pathway	uc002rmz.4;uc002rna.4;uc002rnb.4;uc002rnc.4;uc010ezn.3;uc002rnd.3;uc002rne.2;uc031rnx.1	51646;51646;51646;51646;51646;51646;81606;81606	0;0;0;0;0;44269;-39398;-40024
chr2	30513501	30513849	349	*	Distal Intergenic	2	30455023	30482899	27877	1	81606	uc031rnx.1	58478	ENSG00000213626	LBH	LBH regulator of WNT signaling pathway	uc002rne.2;uc031rnx.1	81606;81606	59104;58478
chr2	32235551	32236199	649	*	Promoter (<=1kb)	2	32092894	32235698	142805	2	51072	uc002rnx.3	0	ENSG00000162959	MEMO1	mediator of cell motility 1	uc002rnx.3;uc010ymu.2;uc002rny.3;uc010ezq.3;uc002rnz.3;uc010ymv.1;uc002roa.1;uc002rob.1	51072;51072;51072;51072;51072;51072;84661;84661	0;0;0;0;0;0;28645;28663
chr2	32286101	32286249	149	*	Distal Intergenic	2	32288680	32382706	94027	1	6683	uc002roc.3	-2431	ENSG00000021574	SPAST	spastin	uc002rny.3;uc010ezq.3;uc002rnz.3;uc010ymv.1;uc002roc.3;uc002rod.3;uc002roa.1;uc002rob.1	51072;51072;51072;51072;6683;6683;84661;84661	0;0;0;0;-2431;-2431;-21257;-21239
chr2	32390751	32390999	249	*	Promoter (<=1kb)	2	32390910	32449181	58272	1	55676	uc002roe.2	0	ENSG00000152683	SLC30A6	solute carrier family 30 member 6	uc002roe.2;uc002rof.2;uc002rog.2;uc002roh.2;uc010ezr.2;uc010ezs.2;uc010ymw.2;uc002roc.3;uc002rod.3	55676;55676;55676;55676;55676;55676;55676;6683;6683	0;0;0;0;0;0;0;102071;102071
chr2	38303801	38304449	649	*	Promoter (<=1kb)	2	38294746	38303323	8578	2	1545	uc002rqo.2	-478	ENSG00000138061	CYP1B1	cytochrome P450 family 1 subfamily B member 1	uc031rob.1;uc002rqn.2;uc002rqo.2	101410544;151393;1545	-40317;126205;-478
chr2	38604551	38604849	299	*	Promoter (<=1kb)	2	38522029	38604432	82404	2	64225	uc002rqs.3	-119	ENSG00000119787	ATL2	atlastin GTPase 2	uc010ynm.2;uc010ynn.2;uc010yno.2;uc002rqq.3;uc002rqr.3;uc002rqs.3	64225;64225;64225;64225;64225;64225	-879;-879;-879;-119;-119;-119
chr2	38828651	38829749	1099	*	Promoter (<=1kb)	2	38790328	38830178	39851	2	92906	uc021vgb.1	429	ENSG00000143889	HNRNPLL	heterogeneous nuclear ribonucleoprotein L like	uc002rqv.3;uc021vgb.1;uc021vgc.1	92906;92906;92906	-19341;0;0
chr2	38977951	38978099	149	*	Promoter (<=1kb)	2	38970741	38978636	7896	2	6432	uc002rqz.3	537	ENSG00000115875	SRSF7	serine and arginine rich splicing factor 7	uc002rqy.3;uc002rqz.3;uc002rra.3;uc010ynp.2;uc002rrb.3;uc002rrc.3;uc002rrd.4;uc002rre.3;uc002rrf.3	130589;6432;6432;6432;79833;79833;90957;90957;90957	84899;0;0;0;-577;-27159;104295;116281;124922
chr2	43358251	43358799	549	*	Distal Intergenic	2	43449541	43453745	4205	2	678	uc002rsv.4	94946	ENSG00000152518	ZFP36L2	ZFP36 ring finger protein like 2	NA	NA	NA
chr2	43396451	43396749	299	*	Distal Intergenic	2	43449541	43453745	4205	2	678	uc002rsv.4	56996	ENSG00000152518	ZFP36L2	ZFP36 ring finger protein like 2	NA	NA	NA
chr2	43406101	43406599	499	*	Distal Intergenic	2	43449541	43453745	4205	2	678	uc002rsv.4	47146	ENSG00000152518	ZFP36L2	ZFP36 ring finger protein like 2	uc010ynx.1;uc002rsv.4	100129726;678	-47751;47146
chr2	43449101	43449499	399	*	Distal Intergenic	2	43449541	43453745	4205	2	678	uc002rsv.4	4246	ENSG00000152518	ZFP36L2	ZFP36 ring finger protein like 2	uc010ynx.1;uc010far.3;uc002rsw.4;uc002rsx.4;uc002rsy.4;uc002rsv.4	100129726;63892;63892;63892;63892;678	-4851;348150;373614;373686;373686;4246
chr2	46925901	46926549	649	*	Promoter (<=1kb)	2	46926099	46989927	63829	1	9655	uc002rvf.3	0	ENSG00000171150	SOCS5	suppressor of cytokine signaling 5	uc002rvf.3;uc002rvg.3	9655;9655	0;0
chr2	47564051	47564349	299	*	Intron (uc002rvu.1/uc002rvu.1, intron 1 of 2)	2	47596287	47614167	17881	1	4072	uc002rvx.3	-31938	ENSG00000119888	EPCAM	epithelial cell adhesion molecule	uc002rvx.3;uc021vhd.1	4072;693144	-31938;-40465
chr2	48133501	48133949	449	*	Promoter (<=1kb)	2	48045556	48132932	87377	2	80204	uc002rwg.2	-569	ENSG00000138081	FBXO11	F-box protein 11	uc010fbl.3;uc002rwe.3;uc002rwg.2	80204;80204;80204	-17643;-569;-569
chr2	48492201	48492749	549	*	Distal Intergenic	2	48541795	48606434	64640	1	3344	uc002rwh.1	-49046	ENSG00000170802	FOXN2	forkhead box N2	uc002rwh.1	3344	0
chr2	48541301	48541849	549	*	Promoter (<=1kb)	2	48541795	48606434	64640	1	3344	uc002rwh.1	0	ENSG00000170802	FOXN2	forkhead box N2	uc002rwh.1	3344	0
chr2	60722201	60722499	299	*	Intron (uc002sab.3/53335, intron 2 of 4)	2	60684329	60763325	78997	2	53335	uc002sad.1	40826	ENSG00000119866	BCL11A	BCL11 transcription factor A	uc002sab.3;uc002sac.3;uc010ypi.2;uc010ypj.2;uc002sad.1;uc002sae.1;uc002saf.1;uc010fcg.3	53335;53335;53335;53335;53335;53335;53335;53335	0;0;0;0;0;0;0;58134
chr2	61765851	61766149	299	*	Promoter (<=1kb)	2	61705069	61765418	60350	2	7514	uc002sbk.3	-433	ENSG00000082898	XPO1	exportin 1	uc002sbh.3;uc010fcl.3;uc010ypn.2;uc002sbj.3;uc002sbk.3	7514;7514;7514;7514;7514	-43973;-1606;-482;-433;-433
chr2	62523301	62523399	99	*	Distal Intergenic	2	62432961	62433052	92	1	100847087	uc031rod.1	90340	ENSG00000266097	MIR5192	microRNA 5192	NA	NA	NA
chr2	68579751	68580149	399	*	Distal Intergenic	2	68592322	68624585	32264	1	5341	uc002sen.4	-12173	ENSG00000115956	PLEK	pleckstrin	uc002sej.4;uc002sek.4;uc010fdd.1;uc002sen.4;uc010fde.3	25927;25927;25927;5341;5341	-32568;-32568;-32732;-12173;-12173
chr2	68630251	68630699	449	*	Distal Intergenic	2	68592322	68624585	32264	1	5341	uc010fde.3	37929	ENSG00000115956	PLEK	pleckstrin	uc002sen.4;uc010fde.3	5341;5341	37929;37929
chr2	70026151	70026499	349	*	Intron (uc010yqn.1/307, intron 3 of 9)	2	70056818	70106727	49910	1	64395	uc002sfu.3	-30319	ENSG00000087338	GMCL1	germ cell-less 1, spermatogenesis associated	uc010yqn.1;uc002sfr.4;uc002sfs.4;uc010yqo.2;uc002sfu.3	307;307;307;307;64395	0;0;0;0;-30319
chr2	70200451	70200699	249	*	Intron (uc010fdn.2/400960, intron 2 of 2)	2	70187224	70189397	2174	2	151516	uc002sfz.4	-11054	ENSG00000244617	ASPRV1	aspartic peptidase retroviral like 1	uc002sfz.4;uc010fdn.2;uc002sga.3;uc002sfy.3;uc010yqp.2;uc010yqq.2;uc010yqr.2;uc010yqs.2	151516;400960;400960;4084;4084;4084;4084;4084	-11054;0;0;58278;58278;58278;58278;58278
chr2	70369501	70369899	399	*	Distal Intergenic	2	70351168	70352448	1281	2	100133985	uc002sgg.4	-17053	ENSG00000231327	LINC01816	long intergenic non-protein coding RNA 1816	uc002sgg.4;uc002sgh.3	100133985;54980	-17053;48252
chr2	78204651	78204999	349	*	Distal Intergenic	2	78182033	78182152	120	2	100170221	uc010ysc.1	-22499	NA	SNAR-H	small NF90 (ILF3) associated RNA H	uc010ysc.1	100170221	-22499
chr2	85197401	85197749	349	*	Promoter (<=1kb)	2	85198231	85286595	88365	1	56888	uc002sox.4	-482	ENSG00000176407	KCMF1	potassium channel modulatory factor 1	uc002sox.4	56888	-482
chr2	85765851	85766899	1049	*	Promoter (<=1kb)	2	85764590	85766009	1420	2	100630918	uc021vka.1	0	ENSG00000286532	PARTICL	promoter of MAT2A antisense radiation-induced circulating long non-coding RNA	uc021vka.1;uc002spu.1;uc010yss.2;uc002sps.3;uc010yst.2;uc010ysr.2;uc002spr.3;uc010fgl.2;uc010fgm.1;uc002spt.4	100630918;10791;2677;2677;2677;4144;4144;4144;4144;8673	0;-44632;18886;21758;21758;0;0;0;-1307;-37715
chr2	86667951	86668349	399	*	Promoter (<=1kb)	2	86668271	86719839	51569	1	55818	uc002sri.4	0	ENSG00000115548	KDM3A	lysine demethylase 3A	uc002sri.4;uc010ytj.2;uc010ytk.2	55818;55818;55818	0;-235;-792
chr2	86790001	86790549	549	*	Promoter (<=1kb)	2	86730553	86790620	60068	2	51652	uc002srj.3	71	ENSG00000115561	CHMP3	charged multivesicular body protein 3	uc010ytl.2;uc002srj.3;uc002srk.3;uc002srl.3;uc021vkf.1;uc002srm.3;uc002srn.3;uc021vkg.1	100526767;51652;51652;51652;51652;7844;7844;7844	0;0;0;0;0;51272;60451;60451
chr2	86946901	86947049	149	*	Promoter (<=1kb)	2	86947414	87005164	57751	1	64795	uc002srr.2	-365	ENSG00000153561	RMND5A	required for meiotic nuclear division 5 homolog A	uc010ytl.2;uc002srr.2;uc002srs.4	100526767;64795;64795	0;0;0
chr2	86947151	86948499	1349	*	Promoter (<=1kb)	2	86730553	86948245	217693	2	100526767	uc010ytl.2	0	ENSG00000249884	RNF103-CHMP3	RNF103-CHMP3 readthrough	uc010ytl.2;uc002srr.2;uc002srs.4	100526767;64795;64795	0;0;0
chr2	87583101	87583249	149	*	Intron (uc002srs.4/64795, intron 3 of 10)	2	87754974	87821030	66057	1	112597	uc002ssk.4	-171725	ENSG00000222041	CYTOR	cytoskeleton regulator RNA	uc002srs.4	64795	0
chr2	87596901	87597349	449	*	Intron (uc002srs.4/64795, intron 3 of 10)	2	87754974	87821030	66057	1	112597	uc002ssk.4	-157625	ENSG00000222041	CYTOR	cytoskeleton regulator RNA	uc002srs.4	64795	0
chr2	87606401	87606549	149	*	Intron (uc002srs.4/64795, intron 3 of 10)	2	87754974	87821030	66057	1	112597	uc002ssk.4	-148425	ENSG00000222041	CYTOR	cytoskeleton regulator RNA	uc002srs.4	64795	0
chr2	87642401	87642649	249	*	Intron (uc002srs.4/64795, intron 3 of 10)	2	87754974	87821030	66057	1	112597	uc002ssk.4	-112325	ENSG00000222041	CYTOR	cytoskeleton regulator RNA	uc002srs.4	64795	0
chr2	87645651	87646399	749	*	Intron (uc002srs.4/64795, intron 3 of 10)	2	87754974	87821030	66057	1	112597	uc002ssk.4	-108575	ENSG00000222041	CYTOR	cytoskeleton regulator RNA	uc002srs.4	64795	0
chr2	87756501	87756999	499	*	Promoter (1-2kb)	2	87754974	87821030	66057	1	112597	uc010fgz.3	1527	ENSG00000222041	CYTOR	cytoskeleton regulator RNA	uc002ssk.4;uc010fgy.3;uc010fgz.3;uc002srs.4	112597;112597;112597;64795	0;0;0;0
chr2	87816051	87816549	499	*	Intron (uc002srs.4/64795, intron 3 of 10)	2	87754974	87821030	66057	1	112597	uc010fgz.3	61077	ENSG00000222041	CYTOR	cytoskeleton regulator RNA	uc002ssk.4;uc010fgy.3;uc010fgz.3;uc002srs.4	112597;112597;112597;64795	0;0;0;0
chr2	87842151	87842749	599	*	Intron (uc002srs.4/64795, intron 3 of 10)	2	87929274	87929353	80	1	100616499	uc021vkl.1	-86525	ENSG00000265507	MIR4435-1	microRNA 4435-1	uc002ssk.4;uc010fgy.3;uc010fgz.3;uc002srs.4	112597;112597;112597;64795	0;0;0;0
chr2	89065151	89065499	349	*	Promoter (<=1kb)	2	89065419	89106109	40691	1	645784	uc010fhg.4	0	ENSG00000291127	ANKRD36BP2	ankyrin repeat domain 36B pseudogene 2	uc021vks.1;uc002ste.3;uc010fhg.4	100616399;22934;645784	-46385;73975;0
chr2	89832601	89832949	349	*	Distal Intergenic	2	89111884	89111968	85	1	100616399	uc021vks.1	720717	ENSG00000265510	MIR4436A	microRNA 4436a	NA	NA	NA
chr2	89863201	89863449	249	*	Distal Intergenic	2	89111884	89111968	85	1	100616399	uc021vks.1	751317	ENSG00000265510	MIR4436A	microRNA 4436a	NA	NA	NA
chr2	89870851	89873999	3149	*	Distal Intergenic	2	89111884	89111968	85	1	100616399	uc021vks.1	758967	ENSG00000265510	MIR4436A	microRNA 4436a	NA	NA	NA
chr2	89874151	89880049	5899	*	Distal Intergenic	2	89111884	89111968	85	1	100616399	uc021vks.1	762267	ENSG00000265510	MIR4436A	microRNA 4436a	NA	NA	NA
chr2	90372751	90373099	349	*	Intron (uc031rom.1/uc031rom.1, intron 40 of 41)	2	89111884	89111968	85	1	100616399	uc021vks.1	1260867	ENSG00000265510	MIR4436A	microRNA 4436a	NA	NA	NA
chr2	90373251	90373499	249	*	Intron (uc031rom.1/uc031rom.1, intron 40 of 41)	2	89111884	89111968	85	1	100616399	uc021vks.1	1261367	ENSG00000265510	MIR4436A	microRNA 4436a	NA	NA	NA
chr2	90379751	90379899	149	*	Intron (uc031rom.1/uc031rom.1, intron 40 of 41)	2	89111884	89111968	85	1	100616399	uc021vks.1	1267867	ENSG00000265510	MIR4436A	microRNA 4436a	NA	NA	NA
chr2	90381151	90381999	849	*	Intron (uc031rom.1/uc031rom.1, intron 40 of 41)	2	89111884	89111968	85	1	100616399	uc021vks.1	1269267	ENSG00000265510	MIR4436A	microRNA 4436a	NA	NA	NA
chr2	90385651	90386349	699	*	Intron (uc031rom.1/uc031rom.1, intron 40 of 41)	2	89111884	89111968	85	1	100616399	uc021vks.1	1273767	ENSG00000265510	MIR4436A	microRNA 4436a	NA	NA	NA
chr2	90420301	90420699	399	*	Intron (uc031rom.1/uc031rom.1, intron 40 of 41)	2	89111884	89111968	85	1	100616399	uc021vks.1	1308417	ENSG00000265510	MIR4436A	microRNA 4436a	NA	NA	NA
chr2	90426851	90427249	399	*	Intron (uc031rom.1/uc031rom.1, intron 40 of 41)	2	89111884	89111968	85	1	100616399	uc021vks.1	1314967	ENSG00000265510	MIR4436A	microRNA 4436a	NA	NA	NA
chr2	90446301	90446649	349	*	Intron (uc031rom.1/uc031rom.1, intron 40 of 41)	2	89111884	89111968	85	1	100616399	uc021vks.1	1334417	ENSG00000265510	MIR4436A	microRNA 4436a	NA	NA	NA
chr2	90452651	90453099	449	*	Intron (uc031rom.1/uc031rom.1, intron 40 of 41)	2	89111884	89111968	85	1	100616399	uc021vks.1	1340767	ENSG00000265510	MIR4436A	microRNA 4436a	NA	NA	NA
chr2	90454301	90454699	399	*	Intron (uc031rom.1/uc031rom.1, intron 40 of 41)	2	89111884	89111968	85	1	100616399	uc021vks.1	1342417	ENSG00000265510	MIR4436A	microRNA 4436a	NA	NA	NA
chr2	90454851	90454949	99	*	Intron (uc031rom.1/uc031rom.1, intron 40 of 41)	2	89111884	89111968	85	1	100616399	uc021vks.1	1342967	ENSG00000265510	MIR4436A	microRNA 4436a	NA	NA	NA
chr2	90481601	90483099	1499	*	Distal Intergenic	2	91805188	91847975	42788	2	654342	uc002sts.4	1364876	ENSG00000143429	LSP1P4	LSP1 pseudogene 4	NA	NA	NA
chr2	91602951	91603499	549	*	Distal Intergenic	2	91805188	91847975	42788	2	654342	uc002sts.4	244476	ENSG00000143429	LSP1P4	LSP1 pseudogene 4	NA	NA	NA
chr2	91616651	91617199	549	*	Distal Intergenic	2	91805188	91847975	42788	2	654342	uc002sts.4	230776	ENSG00000143429	LSP1P4	LSP1 pseudogene 4	NA	NA	NA
chr2	91617851	91618549	699	*	Distal Intergenic	2	91805188	91847975	42788	2	654342	uc002sts.4	229426	ENSG00000143429	LSP1P4	LSP1 pseudogene 4	NA	NA	NA
chr2	91632351	91632649	299	*	Distal Intergenic	2	91805188	91847975	42788	2	654342	uc002sts.4	215326	ENSG00000143429	LSP1P4	LSP1 pseudogene 4	NA	NA	NA
chr2	91643401	91643699	299	*	Distal Intergenic	2	91805188	91847975	42788	2	654342	uc002sts.4	204276	ENSG00000143429	LSP1P4	LSP1 pseudogene 4	NA	NA	NA
chr2	91655001	91655199	199	*	Distal Intergenic	2	91805188	91847975	42788	2	654342	uc002sts.4	192776	ENSG00000143429	LSP1P4	LSP1 pseudogene 4	NA	NA	NA
chr2	91658751	91658999	249	*	Distal Intergenic	2	91805188	91847975	42788	2	654342	uc002sts.4	188976	ENSG00000143429	LSP1P4	LSP1 pseudogene 4	NA	NA	NA
chr2	91663901	91664499	599	*	Distal Intergenic	2	91805188	91847975	42788	2	654342	uc002sts.4	183476	ENSG00000143429	LSP1P4	LSP1 pseudogene 4	NA	NA	NA
chr2	91682551	91683099	549	*	Distal Intergenic	2	91805188	91847975	42788	2	654342	uc002sts.4	164876	ENSG00000143429	LSP1P4	LSP1 pseudogene 4	NA	NA	NA
chr2	91686551	91687049	499	*	Distal Intergenic	2	91805188	91847975	42788	2	654342	uc002sts.4	160926	ENSG00000143429	LSP1P4	LSP1 pseudogene 4	NA	NA	NA
chr2	91760301	91761199	899	*	Distal Intergenic	2	91805188	91847975	42788	2	654342	uc002sts.4	86776	ENSG00000143429	LSP1P4	LSP1 pseudogene 4	uc002sts.4	654342	0
chr2	91763251	91763599	349	*	Distal Intergenic	2	91805188	91847975	42788	2	654342	uc002sts.4	84376	ENSG00000143429	LSP1P4	LSP1 pseudogene 4	uc002sts.4	654342	0
chr2	91780501	91781749	1249	*	Distal Intergenic	2	91805188	91847975	42788	2	654342	uc002sts.4	66226	ENSG00000143429	LSP1P4	LSP1 pseudogene 4	uc002sts.4;uc010yub.1	654342;654342	0;66226
chr2	91783401	91783999	599	*	Distal Intergenic	2	91805188	91847975	42788	2	654342	uc002sts.4	63976	ENSG00000143429	LSP1P4	LSP1 pseudogene 4	uc002sts.4;uc010yub.1	654342;654342	0;63976
chr2	91787801	91788599	799	*	Distal Intergenic	2	91805188	91847975	42788	2	654342	uc002sts.4	59376	ENSG00000143429	LSP1P4	LSP1 pseudogene 4	uc002sts.4;uc010yub.1	654342;654342	0;59376
chr2	91799951	91800099	149	*	Distal Intergenic	2	91805188	91847975	42788	2	654342	uc002sts.4	47876	ENSG00000143429	LSP1P4	LSP1 pseudogene 4	uc002sts.4;uc010yub.1	654342;654342	0;47876
chr2	91807601	91808499	899	*	Intron (uc002sts.4/654342, intron 2 of 2)	2	91805188	91847975	42788	2	654342	uc002sts.4	39476	ENSG00000143429	LSP1P4	LSP1 pseudogene 4	uc002sts.4;uc010yub.1	654342;654342	0;39476
chr2	91823851	91824149	299	*	Intron (uc002sts.4/654342, intron 2 of 2)	2	91805188	91847975	42788	2	654342	uc002sts.4	23826	ENSG00000143429	LSP1P4	LSP1 pseudogene 4	uc002sts.4;uc010yub.1	654342;654342	0;23826
chr2	91853451	91853699	249	*	Distal Intergenic	2	91824709	91847975	23267	2	654342	uc010yub.1	-5476	ENSG00000143429	LSP1P4	LSP1 pseudogene 4	uc002sts.4;uc010yub.1	654342;654342	0;-5476
chr2	91893801	91894249	449	*	Distal Intergenic	2	91824709	91847975	23267	2	654342	uc010yub.1	-45826	ENSG00000143429	LSP1P4	LSP1 pseudogene 4	uc002sts.4;uc010yub.1	654342;654342	0;-45826
chr2	91903701	91903949	249	*	Distal Intergenic	2	91824709	91847975	23267	2	654342	uc010yub.1	-55726	ENSG00000143429	LSP1P4	LSP1 pseudogene 4	NA	NA	NA
chr2	91904051	91904449	399	*	Distal Intergenic	2	91824709	91847975	23267	2	654342	uc010yub.1	-56076	ENSG00000143429	LSP1P4	LSP1 pseudogene 4	NA	NA	NA
chr2	91914001	91914649	649	*	Distal Intergenic	2	91963368	91970153	6786	1	645367	uc010fho.1	-48719	NA	GGT8P	gamma-glutamyltransferase 8 pseudogene	uc010fho.1	645367	-48719
chr2	91977151	91977849	699	*	Distal Intergenic	2	91963368	91970153	6786	1	645367	uc010fho.1	13783	NA	GGT8P	gamma-glutamyltransferase 8 pseudogene	uc010fho.1	645367	13783
chr2	91985001	91985499	499	*	Distal Intergenic	2	91963368	91970153	6786	1	645367	uc010fho.1	21633	NA	GGT8P	gamma-glutamyltransferase 8 pseudogene	uc010fho.1	645367	21633
chr2	91991151	91991299	149	*	Distal Intergenic	2	91963368	91970153	6786	1	645367	uc010fho.1	27783	NA	GGT8P	gamma-glutamyltransferase 8 pseudogene	uc010fho.1	645367	27783
chr2	92244651	92245299	649	*	Distal Intergenic	2	92129159	92130496	1338	1	440888	uc010yuc.2	115492	ENSG00000288272	ACTR3BP2	ACTR3B pseudogene 2	NA	NA	NA
chr2	92245951	92246499	549	*	Distal Intergenic	2	92129159	92130496	1338	1	440888	uc010yuc.2	116792	ENSG00000288272	ACTR3BP2	ACTR3B pseudogene 2	NA	NA	NA
chr2	92251901	92252049	149	*	Distal Intergenic	2	92129159	92130496	1338	1	440888	uc010yuc.2	122742	ENSG00000288272	ACTR3BP2	ACTR3B pseudogene 2	NA	NA	NA
chr2	92264351	92264749	399	*	Distal Intergenic	2	92129159	92130496	1338	1	440888	uc010yuc.2	135192	ENSG00000288272	ACTR3BP2	ACTR3B pseudogene 2	NA	NA	NA
chr2	96597751	96598449	699	*	Intron (uc002sva.1/uc002sva.1, intron 5 of 41)	2	96676299	96688884	12586	1	729234	uc010fht.3	-77850	NA	FAHD2CP	fumarylacetoacetate hydrolase domain containing 2C, pseudogene	NA	NA	NA
chr2	96598901	96599049	149	*	Intron (uc002sva.1/uc002sva.1, intron 5 of 41)	2	96676299	96688884	12586	1	729234	uc010fht.3	-77250	NA	FAHD2CP	fumarylacetoacetate hydrolase domain containing 2C, pseudogene	NA	NA	NA
chr2	96823701	96823899	199	*	Distal Intergenic	2	96808908	96811179	2272	2	1844	uc002svk.4	-12522	ENSG00000158050	DUSP2	dual specificity phosphatase 2	uc021vlh.1;uc002svk.4;uc010yui.2;uc002svl.3;uc002svm.4	151;1844;431705;56910;56910	-41813;-12522;-19526;37388;50674
chr2	97163901	97164299	399	*	Exon (uc010fhx.3/93082, exon 6 of 6)	2	97163383	97171094	7712	2	93082	uc010fhx.3	6795	ENSG00000163121	NEURL3	neuralized E3 ubiquitin protein ligase 3	uc002swe.3;uc002swf.3;uc002swg.3;uc010yuq.2;uc031ron.1;uc010fhx.3;uc002swc.3;uc010yuo.2;uc010yup.1	10865;10865;10865;10865;10865;93082;93082;93082;93082	-38165;-38165;-38165;-38165;-39317;0;0;6795;6795
chr2	97304001	97304149	149	*	Promoter (<=1kb)	2	97258892	97304116	45225	2	55683	uc002swk.5	0	ENSG00000114982	KANSL3	KAT8 regulatory NSL complex subunit 3	uc002swh.5;uc002swi.5;uc002swj.5;uc002swk.5;uc002swl.5;uc002swm.5;uc002swn.5;uc010fhz.4;uc010yur.3;uc002swo.3;uc002swp.1;uc002swq.1;uc010fhy.2;uc002swr.2;uc010fia.3;uc002sws.4	55683;55683;55683;55683;55683;55683;55683;55683;55683;55683;55683;55683;55683;90342;90342;90342	-6782;-6782;-204;0;0;0;0;0;0;-32753;-6519;-1036;0;-4425;-4425;-31707
chr2	97779001	97779299	299	*	Promoter (<=1kb)	2	97779233	97784566	5334	1	375248	uc002sxn.2	0	ENSG00000135976	ANKRD36	ankyrin repeat domain 36	uc002sxm.3;uc002sxn.2;uc021vlk.1;uc010yuz.1;uc010fic.2;uc002sxo.2;uc002sxp.3;uc010yva.2;uc002sxq.2	151313;375248;375248;375248;375248;375248;375248;375248;375248	-18419;0;0;0;0;0;0;0;-49675
chr2	97807751	97807949	199	*	Intron (uc021vlk.1/375248, intron 6 of 6)	2	97828974	97866099	37126	1	375248	uc002sxq.2	-21025	ENSG00000135976	ANKRD36	ankyrin repeat domain 36	uc002sxm.3;uc002sxn.2;uc021vlk.1;uc010yuz.1;uc010fic.2;uc002sxo.2;uc002sxp.3;uc010yva.2;uc002sxq.2	151313;375248;375248;375248;375248;375248;375248;375248;375248	-47169;0;0;0;0;0;0;0;-21025
chr2	99751501	99751899	399	*	Intron (uc002szh.4/80705, intron 1 of 19)	2	99688169	99757612	69444	2	80705	uc010yvn.1	5713	ENSG00000135951	TSGA10	testis specific 10	uc002szs.1;uc002szk.3;uc002szl.1;uc002szr.3;uc002szu.3;uc002szv.3;uc002szm.4;uc002szn.4;uc002szo.4;uc002szp.4;uc002szq.4;uc021vln.1;uc021vlo.1;uc002szg.4;uc002szh.4;uc002szi.4;uc010fin.1;uc010yvn.1;uc002szj.1	129531;150590;51263;51263;51263;51263;51601;51601;51601;51601;51601;51601;51601;80705;80705;80705;80705;80705;80705	45593;-6286;-6286;-19519;-45643;-45643;-19519;-19519;-19519;-19519;-19519;-19638;-19638;-16259;0;0;0;0;0
chr2	100105601	100106199	599	*	Promoter (<=1kb)	2	100016938	100106480	89543	2	51455	uc002tac.3	281	ENSG00000135945	REV1	REV1 DNA directed polymerase	uc002tac.3;uc002tad.3;uc002tae.1	51455;51455;51455	0;0;-26351
chr2	102685851	102686099	249	*	Promoter (<=1kb)	2	102686836	102796334	109499	1	3554	uc010fix.3	-737	ENSG00000115594	IL1R1	interleukin 1 receptor type 1	uc010fix.3;uc002tbo.2;uc002tbm.3;uc002tbn.4;uc031rop.1	3554;7850;7850;7850;7850	-737;77545;77545;70427;60874
chr2	109786651	109786799	149	*	Intron (uc010ywt.1/344558, intron 1 of 9)	2	109757946	109758044	99	2	100422863	uc021vlw.1	-28607	ENSG00000264934	MIR4265	microRNA 4265	uc021vlv.1;uc021vlw.1;uc010ywt.1	100287216;100422863;344558	-40076;-28607;0
chr2	111943201	111943399	199	*	Distal Intergenic	2	111878491	111926022	47532	1	10018	uc021vms.1	64710	ENSG00000153094	BCL2L11	BCL2 like 11	uc021vmo.1;uc002tgu.1;uc002tgv.1;uc002tgw.2;uc002tgx.2;uc002tgy.2;uc002tgz.2;uc002tha.2;uc002thb.2;uc002thc.2;uc002thd.2;uc010fkd.2;uc010fke.2;uc021vmp.1;uc021vmq.1;uc021vmr.1;uc021vms.1;uc002the.2	10018;10018;10018;10018;10018;10018;10018;10018;10018;10018;10018;10018;10018;10018;10018;10018;10018;541471	64710;64710;64710;64710;64710;64710;64710;64710;64710;64710;64710;64710;64710;64710;64710;64710;64710;0
chr2	112165451	112165749	299	*	Intron (uc002the.2/541471, intron 1 of 5)	2	112078589	112078668	80	2	100616499	uc021vmu.1	-86783	ENSG00000265507	MIR4435-1	microRNA 4435-1	uc002the.2;uc010yxl.1;uc002thf.4	541471;541471;541471	0;0;0
chr2	112250551	112251299	749	*	Promoter (1-2kb)	2	111965359	112252692	287334	2	541471	uc002the.2	1393	ENSG00000172965	MIR4435-2HG	MIR4435-2 host gene	uc002the.2;uc010yxl.1;uc002thf.4	541471;541471;541471	0;0;0
chr2	112812501	112812999	499	*	Promoter (<=1kb)	2	112812800	112839095	26296	1	84910	uc010fkg.2	0	ENSG00000153214	TMEM87B	transmembrane protein 87B	uc002thk.1;uc002thl.1;uc010fkg.2;uc010fkh.2;uc002thm.2	10461;10461;84910;84910;84910	156310;156310;0;0;0
chr2	113441601	113441799	199	*	Distal Intergenic	2	113413965	113418149	4185	1	6574	uc002tic.1	27636	ENSG00000144136	SLC20A1	solute carrier family 20 member 1	uc010fkq.2;uc002tib.3;uc002tic.1	400999;6574;6574	-39844;38167;27636
chr2	113463851	113464099	249	*	Distal Intergenic	2	113413965	113418149	4185	1	6574	uc002tic.1	49886	ENSG00000144136	SLC20A1	solute carrier family 20 member 1	uc002tie.2;uc002tif.2;uc010yxp.1;uc010yxq.1;uc002tib.3;uc002tic.1	150468;150468;150468;150468;6574;6574	58155;58155;58155;58155;60417;49886
chr2	114173701	114174049	349	*	Distal Intergenic	2	114195268	114201594	6327	1	150472	uc002tjt.2	-21219	ENSG00000136682	ZNG1B	Zn regulated GTPase metalloprotein activator 1B	uc002tjt.2;uc010yxw.2;uc002tju.3;uc010fkv.3	150472;150472;150472;150472	-21219;-21219;-21219;-21219
chr2	114258001	114258249	249	*	Promoter (1-2kb)	2	114256661	114258727	2067	1	200350	uc002tjw.4	1340	ENSG00000184492	FOXD4L1	forkhead box D4 like 1	uc010yxw.2;uc002tju.3;uc010fkv.3;uc002tjw.4	150472;150472;150472;200350	62733;62733;62733;0
chr2	114338151	114338749	599	*	Distal Intergenic	2	114341230	114356613	15384	1	375260	uc002tka.3	-2481	ENSG00000291134	WASH2P	WASP family homolog 2, pseudogene	uc002tkm.4;uc002tkn.4;uc010flb.3;uc002tks.4;uc002tkp.4;uc002tkr.3;uc002tkq.3;uc002tkk.2;uc010yxy.1;uc010yxz.1;uc010yya.2;uc010yyb.2;uc002tka.3;uc010fkx.1;uc002tkd.3;uc002tke.1;uc010fkz.1;uc002tkf.2;uc002tkh.3;uc002tjz.3;uc010yxx.2	11159;11159;11159;11159;11159;11159;11159;118433;118433;118433;118433;118433;375260;375260;375260;375260;375260;375260;375260;654412;84771	-46068;-46068;-46068;-46102;-46192;-46192;-47382;45966;45966;45966;45966;45966;0;-7378;-7378;-12494;-13888;-14512;-14896;3192;20404
chr2	114339901	114340549	649	*	Promoter (<=1kb)	2	114341230	114356613	15384	1	375260	uc002tka.3	-681	ENSG00000291134	WASH2P	WASP family homolog 2, pseudogene	uc002tkm.4;uc002tkn.4;uc010flb.3;uc002tks.4;uc002tkp.4;uc002tkr.3;uc002tkq.3;uc002tkk.2;uc010yxy.1;uc010yxz.1;uc010yya.2;uc010yyb.2;uc002tka.3;uc010fkx.1;uc002tkd.3;uc002tke.1;uc010fkz.1;uc002tkf.2;uc002tkh.3;uc002tjz.3;uc010yxx.2	11159;11159;11159;11159;11159;11159;11159;118433;118433;118433;118433;118433;375260;375260;375260;375260;375260;375260;375260;654412;84771	-44268;-44268;-44268;-44302;-44392;-44392;-45582;44166;44166;44166;44166;44166;0;-5578;-5578;-10694;-12088;-12712;-13096;4942;18604
chr2	114341251	114342299	1049	*	Promoter (<=1kb)	2	114341230	114356613	15384	1	375260	uc002tka.3	21	ENSG00000291134	WASH2P	WASP family homolog 2, pseudogene	uc002tkm.4;uc002tkn.4;uc010flb.3;uc002tks.4;uc002tkp.4;uc002tkr.3;uc002tkq.3;uc002tkk.2;uc010yxy.1;uc010yxz.1;uc010yya.2;uc010yyb.2;uc002tka.3;uc010fkx.1;uc002tkd.3;uc002tke.1;uc010fkz.1;uc002tkf.2;uc002tkh.3;uc002tjz.3;uc010yxx.2	11159;11159;11159;11159;11159;11159;11159;118433;118433;118433;118433;118433;375260;375260;375260;375260;375260;375260;375260;654412;84771	-42518;-42518;-42518;-42552;-42642;-42642;-43832;42416;42416;42416;42416;42416;0;-3828;-3828;-8944;-10338;-10962;-11346;6292;16854
chr2	114367451	114367649	199	*	Distal Intergenic	2	114356605	114359153	2549	2	84771	uc010yxx.2	-8298	ENSG00000290825	DDX11L2	DEAD/H-box helicase 11 like 2 (pseudogene)	uc002tkm.4;uc002tkn.4;uc010flb.3;uc002tks.4;uc002tkp.4;uc002tkr.3;uc002tkq.3;uc002tkk.2;uc010yxy.1;uc010yxz.1;uc010yya.2;uc010yyb.2;uc002tka.3;uc010fkx.1;uc002tkd.3;uc002tke.1;uc010fkz.1;uc002tkf.2;uc002tkh.3;uc002tjz.3;uc010yxx.2	11159;11159;11159;11159;11159;11159;11159;118433;118433;118433;118433;118433;375260;375260;375260;375260;375260;375260;375260;654412;84771	-17168;-17168;-17168;-17202;-17292;-17292;-18482;17066;17066;17066;17066;17066;0;21324;21324;16208;14814;14190;13806;32492;-8298
chr2	119981151	119981549	399	*	Promoter (<=1kb)	2	119981384	120023227	41844	1	55240	uc002tlp.3	0	ENSG00000115107	STEAP3	STEAP3 metalloreductase	uc002tlp.3;uc002tlq.3;uc002tlr.3;uc010fle.3	55240;55240;55240;55240	0;0;0;0
chr2	121009601	121009749	149	*	Promoter (<=1kb)	2	121010414	121052286	41873	1	5899	uc002tmk.3	-665	ENSG00000144118	RALB	RAS like proto-oncogene B	uc010yys.2;uc002tmk.3;uc002tml.3;uc010yyt.2;uc002tmj.2	5899;5899;5899;5899;79134	0;-665;-665;-665;-28617
chr2	122313901	122314249	349	*	Intron (uc010yyy.2/23332, intron 1 of 35)	2	122288456	122288585	130	1	100151683	uc010yzd.1	25445	ENSG00000264229	RNU4ATAC	RNA, U4atac small nuclear	uc010yzd.1;uc010yyy.2;uc002tnc.3;uc010yyz.2;uc010yza.2;uc010yzc.2;uc021vnl.1;uc002tng.1	100151683;23332;23332;23332;23332;23332;23332;23332	25445;0;0;0;0;0;0;0
chr2	127402901	127403149	249	*	Distal Intergenic	2	127413511	127454251	40741	1	2995	uc002tnq.4	-10362	ENSG00000136732	GYPC	glycophorin C (Gerbich blood group)	uc002tnq.4;uc002tnr.4;uc010flv.4	2995;2995;2995	0;0;0
chr2	127419401	127419599	199	*	Intron (uc002tnq.4/2995, intron 1 of 3)	2	127413511	127454251	40741	1	2995	uc010flv.4	5890	ENSG00000136732	GYPC	glycophorin C (Gerbich blood group)	uc002tnq.4;uc002tnr.4;uc010flv.4	2995;2995;2995	0;0;0
chr2	127752001	127752349	349	*	Distal Intergenic	2	127805599	127839641	34043	2	274	uc010yzf.2	87292	ENSG00000136717	BIN1	bridging integrator 1	NA	NA	NA
chr2	127838051	127838399	349	*	Promoter (1-2kb)	2	127805599	127839641	34043	2	274	uc010yzf.2	1242	ENSG00000136717	BIN1	bridging integrator 1	uc010yzf.2;uc002tns.2;uc002tnt.2;uc002tnu.2;uc002tnv.2;uc002tnw.2;uc002tnx.2;uc002tny.2;uc002tnz.2;uc002toa.2;uc002tob.2;uc002toc.2;uc010yzg.2	274;274;274;274;274;274;274;274;274;274;274;274;274	0;0;0;0;0;0;0;0;0;0;0;0;0
chr2	129230451	129231249	799	*	Distal Intergenic	2	129023054	129076171	53118	2	9394	uc002tpt.4	-154280	ENSG00000136720	HS6ST1	heparan sulfate 6-O-sulfotransferase 1	NA	NA	NA
chr2	132769351	132770099	749	*	Distal Intergenic	2	132905164	132919525	14362	2	554226	uc002tti.3	149426	ENSG00000163046	ANKRD30BL	ankyrin repeat domain 30B like	NA	NA	NA
chr2	132782851	132782999	149	*	Distal Intergenic	2	132905164	132919525	14362	2	554226	uc002tti.3	136526	ENSG00000163046	ANKRD30BL	ankyrin repeat domain 30B like	NA	NA	NA
chr2	132967401	132967599	199	*	Intron (uc002ttj.3/554226, intron 1 of 4)	2	133014539	133014653	115	2	100313824	uc021vpu.1	47054	ENSG00000221288	MIR663B	microRNA 663b	uc021vpu.1;uc002tti.3;uc002ttj.3	100313824;554226;554226	47054;-47876;0
chr2	132968351	132968549	199	*	Intron (uc002ttj.3/554226, intron 1 of 4)	2	133014539	133014653	115	2	100313824	uc021vpu.1	46104	ENSG00000221288	MIR663B	microRNA 663b	uc021vpu.1;uc002tti.3;uc002ttj.3	100313824;554226;554226	46104;-48826;0
chr2	132981951	132982099	149	*	Intron (uc002ttj.3/554226, intron 1 of 4)	2	133014539	133014653	115	2	100313824	uc021vpu.1	32554	ENSG00000221288	MIR663B	microRNA 663b	uc021vpu.1;uc002ttj.3	100313824;554226	32554;0
chr2	133019901	133020849	949	*	Distal Intergenic	2	132905164	133015542	110379	2	554226	uc002ttj.3	-4359	ENSG00000163046	ANKRD30BL	ankyrin repeat domain 30B like	uc021vpu.1;uc002ttj.3	100313824;554226	-5248;0
chr2	133024001	133024549	549	*	Distal Intergenic	2	132905164	133015542	110379	2	554226	uc002ttj.3	-8459	ENSG00000163046	ANKRD30BL	ankyrin repeat domain 30B like	uc021vpu.1;uc002ttj.3	100313824;554226	-9348;0
chr2	133029551	133029849	299	*	Distal Intergenic	2	132905164	133015542	110379	2	554226	uc002ttj.3	-14009	ENSG00000163046	ANKRD30BL	ankyrin repeat domain 30B like	uc021vpu.1;uc002ttj.3	100313824;554226	-14898;0
chr2	133034301	133034699	399	*	Distal Intergenic	2	132905164	133015542	110379	2	554226	uc002ttj.3	-18759	ENSG00000163046	ANKRD30BL	ankyrin repeat domain 30B like	uc021vpu.1;uc002ttj.3	100313824;554226	-19648;0
chr2	140622451	140622599	149	*	Distal Intergenic	2	139654894	139656744	1851	1	647012	uc021vqc.1	967557	NA	YY1P2	YY1 transcription factor pseudogene 2	NA	NA	NA
chr2	145340151	145340699	549	*	Distal Intergenic	2	145268952	145277958	9007	2	9839	uc031rpm.1	-62193	ENSG00000169554	ZEB2	zinc finger E-box binding homeobox 2	NA	NA	NA
chr2	152118151	152118549	399	*	Promoter (<=1kb)	2	152104728	152118389	13662	2	375287	uc002txh.3	0	ENSG00000184898	RBM43	RNA binding motif protein 43	uc002txh.3;uc002txi.2;uc010zbx.1;uc002txj.2	375287;9111;9111;9111	0;27881;27881;27881
chr2	157198251	157198449	199	*	Distal Intergenic	2	157180944	157189287	8344	2	4929	uc010zcf.2	-8964	ENSG00000153234	NR4A2	nuclear receptor subfamily 4 group A member 2	uc021vri.1;uc002tyx.4;uc002tyz.4;uc010zcf.2;uc010zcg.1	4929;4929;4929;4929;4929	-11551;-8964;-8964;-8964;-13725
chr2	159992051	159992299	249	*	Promoter (<=1kb)	2	159992705	160007288	14584	1	85461	uc002uah.1	-406	ENSG00000115183	TANC1	tetratricopeptide repeat, ankyrin repeat and coiled-coil containing 1	uc010fol.1;uc002uag.3;uc010zcm.2;uc010fom.1;uc002uah.1	85461;85461;85461;85461;85461	0;0;0;0;0
chr2	160003651	160004199	549	*	Intron (uc010fol.1/85461, intron 5 of 11)	2	159992705	160007288	14584	1	85461	uc002uah.1	10946	ENSG00000115183	TANC1	tetratricopeptide repeat, ankyrin repeat and coiled-coil containing 1	uc010fol.1;uc002uag.3;uc010zcm.2;uc010fom.1;uc002uah.1	85461;85461;85461;85461;85461	0;0;0;0;0
chr2	160471951	160472399	449	*	Promoter (<=1kb)	2	160289268	160472028	182761	2	29994	uc002uas.1	0	ENSG00000123636	BAZ2B	bromodomain adjacent to zinc finger domain 2B	uc002uao.3;uc002uap.3;uc002uas.1;uc002uau.1	29994;29994;29994;29994	0;0;0;0
chr2	171674051	171674349	299	*	Promoter (<=1kb)	2	171673200	171717659	44460	1	2571	uc002ugi.3	851	ENSG00000128683	GAD1	glutamate decarboxylase 1	uc031rpy.1;uc031rpz.1;uc002ugh.3;uc002ugi.3;uc010fqc.3	100505695;100505695;2571;2571;2571	46447;46447;0;0;-31228
chr2	171679501	171679899	399	*	Intron (uc002ugh.3/2571, intron 3 of 6)	2	171673200	171717659	44460	1	2571	uc002ugi.3	6301	ENSG00000128683	GAD1	glutamate decarboxylase 1	uc031rpy.1;uc031rpz.1;uc002ugh.3;uc002ugi.3;uc010fqc.3	100505695;100505695;2571;2571;2571	51897;51897;0;0;-25678
chr2	171680151	171680449	299	*	Intron (uc002ugh.3/2571, intron 3 of 6)	2	171673200	171717659	44460	1	2571	uc002ugi.3	6951	ENSG00000128683	GAD1	glutamate decarboxylase 1	uc031rpy.1;uc031rpz.1;uc002ugh.3;uc002ugi.3;uc010fqc.3	100505695;100505695;2571;2571;2571	52547;52547;0;0;-25128
chr2	172487401	172487799	399	*	Distal Intergenic	2	172543919	172606668	62750	1	1781	uc002uha.2	-56120	ENSG00000077380	DYNC1I2	dynein cytoplasmic 1 intermediate chain 2	NA	NA	NA
chr2	174828851	174829099	249	*	Promoter (<=1kb)	2	174771187	174828947	57761	2	6670	uc002uie.3	0	ENSG00000172845	SP3	Sp3 transcription factor	uc002uie.3;uc002uif.3;uc002uig.3;uc010zel.2	6670;6670;6670;6670	0;0;0;0
chr2	178077601	178078349	749	*	Promoter (<=1kb)	2	178077488	178088685	11198	1	220988	uc002uld.2	113	ENSG00000170144	HNRNPA3	heterogeneous nuclear ribonucleoprotein A3	uc021vsu.1;uc031rqb.1;uc002ulb.1;uc002ulc.1;uc002uld.2;uc002ule.3;uc002ulg.5;uc010zfa.3;uc002ulh.5;uc002uli.5;uc010fra.3;uc010frb.3	100422824;100616394;220988;220988;220988;220988;4780;4780;4780;4780;4780;4780	42389;147;0;0;0;-3055;50268;50268;0;0;50268;50268
chr2	178129301	178130099	799	*	Promoter (<=1kb)	2	178095031	178129859	34829	2	4780	uc002ulh.5	0	ENSG00000116044	NFE2L2	NFE2 like bZIP transcription factor 2	uc002ulj.1;uc021vsu.1;uc002ulb.1;uc002ulc.1;uc002uld.2;uc002ule.3;uc002ulg.5;uc010zfa.3;uc002ulh.5;uc002uli.5;uc010fra.3;uc010frb.3	100130691;100422824;220988;220988;220988;220988;4780;4780;4780;4780;4780;4780	58025;-8563;0;0;0;47897;-684;-684;0;0;-684;-684
chr2	183988851	183989149	299	*	Promoter (<=1kb)	2	183989083	184026408	37326	1	129401	uc002upf.3	0	ENSG00000163002	NUP35	nucleoporin 35	uc010zfs.2;uc002upf.3;uc002upg.3;uc010zft.2;uc002upd.3;uc002upe.3;uc010frp.3;uc010zfr.2	129401;129401;129401;129401;142679;142679;142679;142679	0;0;0;0;45564;45564;45564;45564
chr2	190446601	190446949	349	*	Promoter (<=1kb)	2	190444539	190446748	2210	2	30061	uc010zfx.1	0	ENSG00000138449	SLC40A1	solute carrier family 40 member 1	uc002uqp.4;uc002uqq.2;uc010zfx.1;uc002uqr.1;uc002uqs.1	30061;30061;30061;30061;30061	-1064;-1064;0;0;0
chr2	191513551	191513799	249	*	Promoter (<=1kb)	2	191513848	191557492	43645	1	4664	uc002usb.3	-49	ENSG00000138386	NAB1	NGFI-A binding protein 1	uc002usb.3;uc010fsc.3;uc010fsd.3;uc002usc.3;uc010zgh.2	4664;4664;4664;4664;4664	-49;-49;-9986;-10085;-10085
chr2	191745951	191746399	449	*	Promoter (<=1kb)	2	191745547	191830270	84724	1	2744	uc002usf.3	404	ENSG00000115419	GLS	glutaminase	uc002usd.2;uc002use.3;uc002usf.3;uc002usg.2;uc002ush.3;uc010zgi.2;uc010zgj.2	2744;2744;2744;2744;2744;2744;2744	0;0;0;-37590;-37590;-45597;-46017
chr2	191746501	191746749	249	*	Promoter (<=1kb)	2	191745547	191830270	84724	1	2744	uc002usf.3	954	ENSG00000115419	GLS	glutaminase	uc002usd.2;uc002use.3;uc002usf.3;uc002usg.2;uc002ush.3;uc010zgi.2;uc010zgj.2	2744;2744;2744;2744;2744;2744;2744	0;0;0;-37240;-37240;-45247;-45667
chr2	198299301	198299499	199	*	Promoter (<=1kb)	2	198256698	198299771	43074	2	23451	uc002uue.3	272	ENSG00000115524	SF3B1	splicing factor 3b subunit 1	uc002uue.3;uc010fsk.1;uc002uuf.3;uc002uug.3;uc002uuh.1;uc010fsl.1	23451;23451;23451;23451;80219;80219	0;0;0;0;-18732;-19196
chr2	198364401	198364549	149	*	Promoter (<=1kb)	2	198351308	198364640	13333	2	3329	uc002uui.3	91	ENSG00000144381	HSPD1	heat shock protein family D (Hsp60) member 1	uc021vum.1;uc002uum.4;uc002uun.4;uc010fsn.3;uc010fso.3;uc010zgz.2;uc021vun.1;uc002uui.3;uc010fsm.3;uc010zgx.2;uc002uuk.3;uc010zgy.1;uc002uul.3;uc002uuh.1;uc010fsl.1	100529241;25843;25843;25843;25843;25843;25843;3329;3329;3329;3329;3329;3336;80219;80219	0;-15746;-16218;-16218;-16218;-16218;-16473;0;0;0;0;0;0;46170;45706
chr2	198364701	198365099	399	*	Promoter (<=1kb)	2	198364721	198418423	53703	1	100529241	uc021vum.1	0	ENSG00000270757	HSPE1-MOB4	HSPE1-MOB4 readthrough	uc021vum.1;uc002uum.4;uc002uun.4;uc010fsn.3;uc010fso.3;uc010zgz.2;uc021vun.1;uc002uui.3;uc010fsm.3;uc010zgx.2;uc002uuk.3;uc010zgy.1;uc002uul.3;uc002uuh.1;uc010fsl.1	100529241;25843;25843;25843;25843;25843;25843;3329;3329;3329;3329;3329;3336;80219;80219	0;-15196;-15668;-15668;-15668;-15668;-15923;0;0;0;0;0;0;46470;46006
chr2	201676201	201676799	599	*	Promoter (<=1kb)	2	201676269	201688569	12301	1	9689	uc002uwc.3	0	ENSG00000082153	BZW1	basic leucine zipper and W2 domains 1	uc010zhi.1;uc002uwe.2;uc002uwf.2;uc002uwg.2;uc021vur.1;uc031rqn.1;uc031rqo.1;uc002uwc.3;uc002uwb.1;uc021vus.1;uc010zhg.2	1195;1195;1195;1195;344454;344454;344454;9689;9689;9689;9689	52485;52668;52668;52668;115755;115755;115755;0;0;-109;-257
chr2	208489601	208489799	199	*	Promoter (<=1kb)	2	208473839	208489696	15858	2	151194	uc002vcf.2	0	ENSG00000144401	METTL21A	methyltransferase 21A, HSPA lysine	uc010ziz.1;uc002vcc.3;uc002vcd.3;uc010zja.1;uc002vce.3;uc002vcf.2;uc010fuk.1;uc002vcg.3	1385;1385;1385;1385;151194;151194;151194;151194	94985;94985;94985;65755;0;0;0;0
chr2	208630451	208630649	199	*	3' UTR	2	208627310	208634143	6834	2	7855	uc002vcj.3	3494	ENSG00000163251	FZD5	frizzled class receptor 5	uc021vvq.1;uc002vch.3;uc002vci.3;uc002vcj.3	100616361;151195;151195;7855	10920;54187;54187;0
chr2	209436501	209436849	349	*	Exon (uc010fuo.1/5746, exon 3 of 7)	2	209353737	209704818	351082	1	5746	uc010fuo.1	82764	ENSG00000144407	PTH2R	parathyroid hormone 2 receptor	uc010fuo.1	5746	0
chr2	218692201	218692699	499	*	Intron (uc002vgr.2/7145, intron 20 of 30)	2	218664512	218678739	14228	2	7145	uc002vgq.2	-13462	ENSG00000079308	TNS1	tensin 1	uc002vgq.2;uc002vgr.2;uc002vgs.2;uc002vgt.2;uc010zjv.1;uc010fvi.1;uc010fvj.1;uc010fvk.1;uc002vgu.3	7145;7145;7145;7145;7145;7145;7145;7145;7145	-13462;0;0;0;0;57904;77485;175019;75837
chr2	219151451	219151799	349	*	Promoter (<=1kb)	2	219138917	219151572	12656	2	64114	uc002vho.1	0	ENSG00000135926	TMBIM1	transmembrane BAX inhibitor motif containing 1	uc002vhd.4;uc002vhe.3;uc002vhf.3;uc002vhk.3;uc002vhl.3;uc010zjw.1;uc010zjx.1;uc010zjy.1;uc002vhm.2;uc002vhn.3;uc002vhq.3;uc002vho.1;uc002vhp.1;uc010zjz.1;uc010zka.2	10109;10109;10109;14;14;151306;151306;151306;25953;25953;25953;64114;64114;64114;64114	69634;69331;51387;-16558;-16558;25713;25713;25713;16336;0;-36103;0;0;0;0
chr2	219152401	219152749	349	*	Promoter (<=1kb)	2	219138917	219151572	12656	2	64114	uc002vho.1	-829	ENSG00000135926	TMBIM1	transmembrane BAX inhibitor motif containing 1	uc002vhd.4;uc002vhe.3;uc002vhf.3;uc002vhk.3;uc002vhl.3;uc010zjw.1;uc010zjx.1;uc010zjy.1;uc002vhm.2;uc002vhn.3;uc002vhq.3;uc002vho.1;uc002vhp.1;uc010zjz.1;uc010zka.2	10109;10109;10109;14;14;151306;151306;151306;25953;25953;25953;64114;64114;64114;64114	70584;70281;52337;-17508;-17508;26663;26663;26663;17286;0;-35153;0;0;0;0
chr2	219258601	219258849	249	*	Exon (uc010zkc.1/6556, exon 13 of 15)	2	219263061	219270664	7604	1	58190	uc021vwv.1	-4212	ENSG00000144579	CTDSP1	CTD small phosphatase 1	uc002vhn.3;uc002vhq.3;uc002vhr.3;uc010zkd.2;uc021vwv.1;uc002vhx.3;uc002vhy.3;uc002vhz.3;uc010zkb.1;uc010fvp.1;uc010fvq.1;uc010zkc.1;uc002vhu.1;uc002vhv.3;uc002vhw.3;uc010fvr.3;uc002via.3;uc010zke.2;uc002vib.3;uc002vic.1	25953;25953;375307;407017;58190;58190;58190;58190;6556;6556;6556;6556;6556;6556;6556;6556;7429;7429;7429;7429	0;70699;37022;-8520;0;-5629;-5629;-7972;11849;11849;11849;0;0;0;0;0;-24989;-24989;-29631;-29642
chr2	219260651	219261099	449	*	Promoter (1-2kb)	2	219263061	219270664	7604	1	58190	uc021vwv.1	-1962	ENSG00000144579	CTDSP1	CTD small phosphatase 1	uc002vhn.3;uc002vhq.3;uc002vhr.3;uc010zkd.2;uc021vwv.1;uc002vhx.3;uc002vhy.3;uc002vhz.3;uc010zkb.1;uc010fvp.1;uc010fvq.1;uc010zkc.1;uc002vhu.1;uc002vhv.3;uc002vhw.3;uc010fvr.3;uc002via.3;uc010zke.2;uc002vib.3;uc002vic.1	25953;25953;375307;407017;58190;58190;58190;58190;6556;6556;6556;6556;6556;6556;6556;6556;7429;7429;7429;7429	0;72749;39072;-6270;0;-3379;-3379;-5722;13899;13899;13899;0;0;0;0;0;-22739;-22739;-27381;-27392
chr2	219262351	219263949	1599	*	Promoter (<=1kb)	2	219263061	219270664	7604	1	58190	uc021vwv.1	0	ENSG00000144579	CTDSP1	CTD small phosphatase 1	uc002vhr.3;uc010zkd.2;uc021vwv.1;uc002vhx.3;uc002vhy.3;uc002vhz.3;uc010zkb.1;uc010fvp.1;uc010fvq.1;uc010zkc.1;uc002vhu.1;uc002vhv.3;uc002vhw.3;uc010fvr.3;uc002via.3;uc010zke.2;uc002vib.3;uc002vic.1	375307;407017;58190;58190;58190;58190;6556;6556;6556;6556;6556;6556;6556;6556;7429;7429;7429;7429	40772;-3420;0;-529;-529;-2872;15599;15599;15599;0;0;0;0;0;-19889;-19889;-24531;-24542
chr2	219271051	219271299	249	*	Distal Intergenic	2	219267369	219267445	77	1	407017	uc010zkd.2	3682	ENSG00000199121	MIR26B	microRNA 26b	uc002vhr.3;uc010zkd.2;uc002vie.2;uc002vif.2;uc002vig.2;uc010fvs.1;uc010zkf.1;uc021vwv.1;uc002vhx.3;uc002vhy.3;uc002vhz.3;uc010zkb.1;uc010fvp.1;uc010fvq.1;uc010zkc.1;uc002vhu.1;uc002vhv.3;uc002vhw.3;uc010fvr.3;uc002via.3;uc010zke.2;uc002vib.3;uc002vic.1	375307;407017;57695;57695;57695;57695;57695;58190;58190;58190;58190;6556;6556;6556;6556;6556;6556;6556;6556;7429;7429;7429;7429	49472;3682;161785;161785;161785;161785;161785;0;6573;6573;4230;24299;24299;24299;0;0;0;0;0;-12539;-12539;-17181;-17192
chr2	220144001	220144649	649	*	Promoter (<=1kb)	2	220144040	220147382	3343	1	3300	uc010zla.1	0	ENSG00000135924	DNAJB2	DnaJ heat shock protein family (Hsp40) member B2	uc010zla.1;uc002vkw.1;uc002vkx.1;uc010zlb.1;uc002vlb.3;uc010zle.3;uc002vlc.4;uc010zld.1;uc010zkv.1;uc010zkw.1;uc002vkg.3;uc002vkh.3;uc002vki.3;uc002vkj.1;uc010zlc.2;uc002vkz.3;uc002vla.3;uc002vkt.1;uc010zkz.1;uc002vke.1;uc002vkf.1;uc002vkk.3;uc010zkx.2;uc002vkm.3;uc002vkn.3;uc002vku.3;uc002vkv.1;uc002vko.2;uc002vks.2;uc010zky.2;uc010fwf.3;uc002vkp.2	3300;3300;3300;3300;389075;389075;389075;406944;55139;55139;55139;55139;55139;55139;5798;5798;5798;7277;7277;79065;79065;79411;79411;79411;79411;80086;80086;8576;8576;8576;8576;8576	0;0;0;-2771;51251;52811;53250;14273;49522;49522;49522;49522;49391;48654;29080;29646;29646;-25363;-24671;-49640;-49640;-38994;-35648;-33870;-33870;26036;26036;33809;33809;33800;33800;33800
chr2	220390701	220390899	199	*	Intron (uc010fwi.2/55515, intron 1 of 4)	2	220381858	220403494	21637	1	55515	uc002vmb.3	8843	ENSG00000072182	ASIC4	acid sensing ion channel subunit family member 4	uc021vxc.1;uc010fwg.3;uc002vme.3;uc002vmf.3;uc010fwk.3;uc002vmh.1;uc010zli.1;uc010fwl.2;uc002vmi.3;uc002vlr.3;uc002vlv.3;uc002vmk.2;uc010fwi.2;uc010fwj.2;uc002vly.2;uc002vma.3;uc002vmb.3;uc010zlh.2;uc002vmc.4	100423039;10290;130612;130612;23363;23363;23363;23363;23363;29926;29926;3623;55515;55515;55515;55515;55515;79586;79586	22970;91001;-17486;-17846;45369;33320;36497;45369;45369;27114;27084;-46055;0;0;0;0;0;16920;17588
chr2	224810001	224810399	399	*	Promoter (<=1kb)	2	224740065	224810052	69988	2	57590	uc002vnq.3	0	ENSG00000085449	WDFY1	WD repeat and FYVE domain containing 1	uc031rrk.1;uc010zlr.1;uc002vnu.2;uc002vnv.2;uc002vnq.3;uc002vnr.4	5270;5270;5270;5270;57590;65080	85796;92958;93637;93637;0;-11722
chr2	225449601	225450349	749	*	Promoter (<=1kb)	2	225334867	225450114	115248	2	8452	uc002vny.3	0	ENSG00000036257	CUL3	cullin 3	uc010fwy.2;uc002vny.3;uc010zls.2	8452;8452;8452	-15059;0;0
chr2	231523901	231524299	399	*	Distal Intergenic	2	231555636	231565244	9609	2	151475	uc002vqw.1	40945	ENSG00000226125	LINC01907	long intergenic non-protein coding RNA 1907	uc002vqw.1	151475	40945
chr2	232478401	232478749	349	*	Distal Intergenic	2	232457575	232458994	1420	1	165100	uc002vrz.3	20826	ENSG00000177673	TEX44	testis expressed 44	uc002vrz.3	165100	20826
chr2	232531051	232531499	449	*	Distal Intergenic	2	232573235	232578250	5016	1	5757	uc002vsb.4	-41736	ENSG00000187514	PTMA	prothymosin alpha	uc021vyc.1;uc002vsb.4;uc002vsc.4;uc010zmf.3	100422885;5757;5757;5757	-46525;0;0;0
chr2	232572601	232573249	649	*	Promoter (<=1kb)	2	232573235	232578250	5016	1	5757	uc002vsb.4	0	ENSG00000187514	PTMA	prothymosin alpha	uc021vyc.1;uc002vse.1;uc002vsb.4;uc002vsc.4;uc010zmf.3	100422885;5147;5757;5757;5757	-4775;72725;0;0;0
chr2	232573351	232574899	1549	*	Promoter (<=1kb)	2	232574491	232578250	3760	1	5757	uc010zmf.3	0	ENSG00000187514	PTMA	prothymosin alpha	uc021vyc.1;uc002vse.1;uc002vsb.4;uc002vsc.4;uc010zmf.3	100422885;5147;5757;5757;5757	-3125;71075;0;0;0
chr2	232575001	232575749	749	*	Promoter (<=1kb)	2	232574491	232578250	3760	1	5757	uc010zmf.3	510	ENSG00000187514	PTMA	prothymosin alpha	uc021vyc.1;uc002vse.1;uc002vsb.4;uc002vsc.4;uc010zmf.3	100422885;5147;5757;5757;5757	-2275;70225;0;0;0
chr2	233956301	233956649	349	*	Intron (uc010zmo.2/3635, intron 2 of 25)	2	233925036	234116549	191514	1	3635	uc010zmp.2	31265	ENSG00000168918	INPP5D	inositol polyphosphate-5-phosphatase D	uc010zmo.2;uc010zmp.2	3635;3635	0;0
chr2	234074551	234074799	249	*	Intron (uc010zmo.2/3635, intron 12 of 25)	2	234160217	234204320	44104	1	55054	uc002vtx.2	-85418	ENSG00000085978	ATG16L1	autophagy related 16 like 1	uc010zmo.2;uc010zmp.2	3635;3635	0;0
chr2	238600601	238601049	449	*	Promoter (<=1kb)	2	238600807	238674558	73752	1	9208	uc002vxd.3	0	ENSG00000124831	LRRFIP1	LRR binding FLII interacting protein 1	uc002vxc.3;uc002vxd.3;uc002vxe.3;uc002vxf.3;uc010znm.2	9208;9208;9208;9208;9208	0;0;0;0;0
chr2	238848901	238849149	249	*	Distal Intergenic	2	238875587	239008054	132468	1	100533179	uc002vxm.4	-26438	ENSG00000258984	UBE2F-SCLY	UBE2F-SCLY readthrough (NMD candidate)	uc002vxm.4;uc002vxj.3;uc002vxk.3;uc010znn.2;uc010zno.2;uc010znp.2;uc031rrw.1;uc031rrx.1;uc031rry.1;uc031rrz.1	100533179;10267;140739;140739;140739;140739;140739;140739;140739;140739	-26438;80714;-26438;-26438;-26438;-26438;-26438;-26438;-26438;-28286
chr2	238873601	238873949	349	*	Promoter (1-2kb)	2	238875587	239008054	132468	1	100533179	uc002vxm.4	-1638	ENSG00000258984	UBE2F-SCLY	UBE2F-SCLY readthrough (NMD candidate)	uc002vxm.4;uc002vxk.3;uc010znn.2;uc010zno.2;uc010znp.2;uc031rrw.1;uc031rrx.1;uc031rry.1;uc031rrz.1	100533179;140739;140739;140739;140739;140739;140739;140739;140739	-1638;-1638;-1638;-1638;-1638;-1638;-1638;-1638;-3486
chr2	239197451	239197699	249	*	Promoter (<=1kb)	2	239157315	239197207	39893	2	8864	uc010znv.1	-244	ENSG00000132326	PER2	period circadian regulator 2	uc002vye.3;uc002vyf.3;uc002vxz.3;uc002vya.3;uc002vyb.2;uc002vyc.3;uc010znv.1;uc010znw.1;uc010fyx.1	26146;26146;55502;55502;55502;8864;8864;8864;8864	-31486;-31486;-48770;-48770;-48770;-244;-244;0;-10855
chr2	240216401	240216799	399	*	Intron (uc002vyk.4/9759, intron 2 of 26)	2	240011372	240220334	208963	2	9759	uc010fyz.1	3535	ENSG00000068024	HDAC4	histone deacetylase 4	uc021vza.1;uc002vyk.4;uc010fyz.1;uc010zoa.1;uc010fza.2	100423043;9759;9759;9759;9759	-10358;0;0;0;0
chr2	240240851	240241349	499	*	Intron (uc002vyk.4/9759, intron 2 of 26)	2	240227157	240227240	84	1	100423043	uc021vza.1	13694	ENSG00000265215	MIR4269	microRNA 4269	uc021vza.1;uc021vzb.1;uc002vyk.4;uc010fyz.1;uc010zoa.1;uc010fza.2	100423043;100616360;9759;9759;9759;9759	13694;32150;0;0;0;0
chr2	241505051	241505499	449	*	Distal Intergenic	2	241508004	241518149	10146	1	57140	uc002vzi.4	-2505	ENSG00000142327	RNPEPL1	arginyl aminopeptidase like 1	uc010zoh.2;uc002vzk.2;uc002vzl.2;uc002vzm.2;uc002vzn.2;uc002vzo.2;uc002vzp.2;uc010fzg.2;uc002vzq.2;uc002vzg.3;uc002vzh.3;uc010fzh.2;uc010fzi.2;uc002vyz.1;uc002vza.1;uc002vzb.1;uc002vzc.1;uc010fzd.1;uc002vzd.1;uc002vze.3;uc010fze.2;uc002vzf.3;uc002vzi.4;uc002vzj.3	11132;11132;11132;11132;11132;11132;11132;11132;11132;285193;285193;2859;2859;51281;51281;51281;51281;51281;51281;51281;51281;51281;57140;57140	-20634;-20634;-20634;-20634;-20634;-20634;-20634;-20634;-20634;5580;5580;-39326;-39326;-7646;-7646;-7646;-7646;-7646;-4776;-4776;-4776;-4776;-2505;-9420
chr2	242949151	242949349	199	*	Distal Intergenic	2	243030844	243102469	71626	1	728323	uc010zpd.1	-81495	NA	LINC01881	long intergenic non-protein coding RNA 1881	NA	NA	NA
chr2	243159251	243159499	249	*	Distal Intergenic	2	243064438	243081022	16585	1	728323	uc010zph.2	94813	NA	LINC01881	long intergenic non-protein coding RNA 1881	NA	NA	NA
chr3	5031051	5031299	249	*	Distal Intergenic	3	4939914	5021646	81733	2	100507582	uc010hce.2	-9405	ENSG00000235831	BHLHE40-AS1	BHLHE40 antisense RNA 1	uc003bqe.1;uc010hce.2;uc003bqf.3;uc011asw.2	100507582;100507582;8553;8553	-9405;-9405;9954;9954
chr3	9438251	9438699	449	*	Promoter (<=1kb)	3	9391373	9438338	46966	2	440944	uc003brm.3	0	ENSG00000206573	THUMPD3-AS1	THUMPD3 antisense RNA 1	uc003brn.4;uc003bro.4;uc003brm.3;uc003brq.3;uc003brs.1;uc003brt.3;uc003bru.3;uc003brv.3;uc010hck.3;uc003brw.1;uc003brx.3	25917;25917;440944;440944;55209;55209;55209;55209;55209;55209;55209	33534;33534;0;0;0;0;-32812;-36978;-45113;-45875;-45875
chr3	9439251	9439749	499	*	Promoter (<=1kb)	3	9439403	9506437	67035	1	55209	uc003brs.1	0	ENSG00000168137	SETD5	SET domain containing 5	uc003brn.4;uc003bro.4;uc003brm.3;uc003brq.3;uc003brs.1;uc003brt.3;uc003bru.3;uc003brv.3;uc010hck.3;uc003brw.1;uc003brx.3	25917;25917;440944;440944;55209;55209;55209;55209;55209;55209;55209	34534;34534;0;0;0;0;-31762;-35928;-44063;-44825;-44825
chr3	9773051	9773249	199	*	Promoter (<=1kb)	3	9773434	9789699	16266	1	7862	uc003bse.3	-185	ENSG00000156983	BRPF1	bromodomain and PHD finger containing 1	uc003bsw.2;uc003bsx.2;uc010hcn.2;uc031ryh.1;uc003bsd.3;uc021wst.1;uc003bsh.3;uc003bsi.3;uc003bsj.3;uc003bsk.3;uc003bsl.3;uc003bsm.3;uc003bsn.3;uc003bso.3;uc003bsp.2;uc003bsq.2;uc003bsr.2;uc010hcm.2;uc003brz.3;uc003bsa.3;uc003bsb.3;uc010hcl.3;uc011ath.2;uc003bsc.3;uc021wss.1;uc003bse.3;uc003bsf.3;uc003bsg.3;uc011ati.2;uc003bst.3;uc003bss.3	10474;10474;10474;10474;151835;151835;4968;4968;4968;4968;4968;4968;4968;4968;4968;4968;4968;4968;64419;64419;64419;64419;64419;64419;64419;7862;7862;7862;7862;8536;8536	56518;0;0;0;27541;27541;0;0;0;0;0;0;0;0;-20205;-20205;-20205;-20205;81934;81934;81934;81934;81934;62648;46163;-185;-185;-185;-185;38419;29005
chr3	9791501	9791799	299	*	Promoter (<=1kb)	3	9791628	9799089	7462	1	4968	uc003bsh.3	0	ENSG00000114026	OGG1	8-oxoguanine DNA glycosylase	uc003btd.4;uc003btc.2;uc003bta.2;uc003btb.2;uc003bsz.2;uc021wsu.1;uc003bsw.2;uc003bsx.2;uc010hcn.2;uc031ryh.1;uc003bsy.4;uc003bsd.3;uc021wst.1;uc003bsh.3;uc003bsi.3;uc003bsj.3;uc003bsk.3;uc003bsl.3;uc003bsm.3;uc003bsn.3;uc003bso.3;uc003bsp.2;uc003bsq.2;uc003bsr.2;uc010hcm.2;uc003brz.3;uc003bsa.3;uc003bsb.3;uc010hcl.3;uc011ath.2;uc003bsc.3;uc021wss.1;uc003bse.3;uc003bsf.3;uc003bsg.3;uc011ati.2;uc0…	100526693;100526693;10093;10093;10093;10093;10474;10474;10474;10474;10474;151835;151835;4968;4968;4968;4968;4968;4968;4968;4968;4968;4968;4968;4968;64419;64419;64419;64419;64419;64419;64419;7862;7862;7862;7862;8536;8536	0;0;0;0;0;-43002;37968;0;0;0;0;45991;45991;0;0;0;0;0;0;0;0;-1655;-1655;-1655;-1655;100384;100384;100384;100384;100384;81098;64613;18067;18067;18067;18067;19869;10455
chr3	9834101	9834699	599	*	Promoter (<=1kb)	3	9834232	9878040	43809	1	100526693	uc003btd.4	0	ENSG00000250151	ARPC4-TTLL3	ARPC4-TTLL3 readthrough	uc003btd.4;uc003btc.2;uc003bta.2;uc003btb.2;uc003bsz.2;uc021wsu.1;uc003bsw.2;uc003bsx.2;uc010hcn.2;uc031ryh.1;uc003bsy.4;uc003btf.4;uc003btg.4;uc010hco.1;uc003bth.4;uc011atj.2;uc003bti.4;uc003btj.4;uc003btk.3;uc011atk.2;uc011atl.2;uc011atm.1;uc003btn.2;uc003bsh.3;uc003bsi.3;uc003bsj.3;uc003bsk.3;uc003bsl.3;uc003bsm.3;uc003bsn.3;uc003bso.3;uc003bsp.2;uc003bsq.2;uc003bsr.2;uc010hcm.2;uc003bse.3;uc0…	100526693;100526693;10093;10093;10093;10093;10474;10474;10474;10474;10474;26140;26140;26140;26140;26140;26140;26140;26140;285367;285367;285367;285367;4968;4968;4968;4968;4968;4968;4968;4968;4968;4968;4968;4968;7862;7862;7862;7862;8536;8536	0;0;0;0;0;-102;-4334;0;0;0;0;-16945;-16945;-20233;-20233;-23059;-24630;-24630;-32551;51003;51003;51003;51003;0;0;0;0;0;0;0;0;40647;40647;40647;40647;60667;60667;60667;60667;-22433;-31847
chr3	10593701	10594049	349	*	Intron (uc003bvw.3/491, intron 2 of 21)	3	10429568	10547268	117701	2	491	uc010hdp.2	-46433	ENSG00000157087	ATP2B2	ATPase plasma membrane Ca2+ transporting 2	uc003bvt.3;uc003bvv.3;uc003bvw.3;uc010hdp.2	491;491;491;491	-46433;-46433;0;-46433
chr3	12994701	12995149	449	*	Intron (uc003bxt.3/9922, intron 1 of 13)	3	12938542	13008960	70419	2	9922	uc003bxt.3	13811	ENSG00000144711	IQSEC1	IQ motif and Sec7 domain ArfGEF 1	uc003bxt.3;uc003bxu.4;uc011auw.2	9922;9922;9922	0;0;0
chr3	12996901	12997199	299	*	Intron (uc003bxt.3/9922, intron 1 of 13)	3	12938542	13008960	70419	2	9922	uc003bxt.3	11761	ENSG00000144711	IQSEC1	IQ motif and Sec7 domain ArfGEF 1	uc003bxt.3;uc003bxu.4;uc011auw.2	9922;9922;9922	0;0;0
chr3	13049051	13049399	349	*	Intron (uc011auw.2/9922, intron 1 of 14)	3	12938542	13028536	89995	2	9922	uc003bxu.4	-20515	ENSG00000144711	IQSEC1	IQ motif and Sec7 domain ArfGEF 1	uc003bxt.3;uc003bxu.4;uc011auw.2	9922;9922;9922	0;0;0
chr3	13059751	13059999	249	*	Intron (uc011auw.2/9922, intron 1 of 14)	3	12938542	13028536	89995	2	9922	uc003bxu.4	-31215	ENSG00000144711	IQSEC1	IQ motif and Sec7 domain ArfGEF 1	uc003bxu.4;uc011auw.2	9922;9922	0;0
chr3	13521551	13521949	399	*	Promoter (<=1kb)	3	13521715	13547924	26210	1	79885	uc003bxy.3	0	ENSG00000163517	HDAC11	histone deacetylase 11	uc010heb.3;uc003bxy.3;uc011aux.2;uc011auy.2	79885;79885;79885;79885	0;0;0;0
chr3	13616901	13617349	449	*	Intron (uc011auz.2/2199, intron 2 of 16)	3	13610240	13679922	69683	1	2199	uc011avc.2	6661	ENSG00000163520	FBLN2	fibulin 2	uc011auz.2;uc011ava.2;uc011avb.2;uc011avc.2	2199;2199;2199;2199	0;0;0;0
chr3	15094201	15094499	299	*	Intron (uc003bzl.3/64432, intron 3 of 3)	3	15090019	15106816	16798	2	64432	uc003bzl.3	12317	ENSG00000131368	MRPS25	mitochondrial ribosomal protein S25	uc003bzm.1;uc010hek.1;uc011avn.1;uc003bzl.3;uc011avl.2;uc011avm.1;uc003bzi.3;uc003bzj.4	64145;64145;64145;64432;64432;64432;7182;7182	46156;46156;46156;0;0;0;104965;104965
chr3	16379351	16379999	649	*	Intron (uc010hes.3/23180, intron 6 of 8)	3	16310633	16378868	68236	1	92106	uc011awb.2	68718	ENSG00000154814	OXNAD1	oxidoreductase NAD binding domain containing 1	uc010hes.3;uc003cay.3;uc010her.2;uc003caw.3;uc003cax.3;uc011awb.2	23180;23180;92106;92106;92106;92106	0;0;72684;72684;72684;68718
chr3	20106951	20107149	199	*	Intron (uc003cbq.3/8850, intron 1 of 17)	3	20081524	20195896	114373	1	8850	uc003cbq.3	25427	ENSG00000114166	KAT2B	lysine acetyltransferase 2B	uc003cbq.3	8850	0
chr3	23852001	23852549	549	*	Promoter (<=1kb)	3	23851934	23933131	81198	1	7324	uc021wua.1	67	ENSG00000170142	UBE2E1	ubiquitin conjugating enzyme E2 E1	uc003cch.3;uc003cci.3;uc011awh.2;uc021wua.1	7324;7324;7324;7324	0;0;0;0
chr3	34720651	34720899	249	*	Distal Intergenic	3	33870130	33911199	41070	1	10015	uc011axw.3	850521	ENSG00000170248	PDCD6IP	programmed cell death 6 interacting protein	NA	NA	NA
chr3	37271301	37271549	249	*	Distal Intergenic	3	37284682	37330782	46101	1	2803	uc003cgu.2	-13133	ENSG00000144674	GOLGA4	golgin A4	uc003cgu.2;uc010hgr.2;uc003cgv.3;uc003cgw.3;uc010hgs.3	2803;2803;2803;2803;2803	-13133;-13133;-13133;-13133;-13133
chr3	38125901	38126099	199	*	Intron (uc003cho.1/9940, intron 7 of 36)	3	38135096	38164228	29133	1	9940	uc003chr.1	-8997	ENSG00000008226	DLEC1	DLEC1 cilia and flagella associated protein	uc003cht.3;uc003chu.3;uc003cho.1;uc003chp.1;uc010hgv.1;uc010hgw.1;uc003chq.1;uc003chr.1;uc010hgx.1;uc003chs.1	30;30;9940;9940;9940;9940;9940;9940;9940;9940	52634;52634;0;0;0;0;0;-8997;-11961;-32435
chr3	38206301	38206599	299	*	Promoter (<=1kb)	3	38207026	38272184	65159	1	9943	uc010hha.1	-427	ENSG00000172939	OXSR1	oxidative stress responsive kinase 1	uc003cht.3;uc003chu.3;uc011ayh.2;uc003chx.3;uc011ayi.2;uc011ayj.2;uc011ayk.2;uc011ayl.2;uc003cho.1;uc003chp.1;uc010hgv.1;uc003chr.1;uc010hgx.1;uc003chs.1;uc010hha.1;uc003chy.3;uc010hhb.3	30;30;4615;4615;4615;4615;4615;4615;9940;9940;9940;9940;9940;9940;9943;9943;9943	-27568;-27568;26332;26332;26332;26332;26332;26332;0;0;0;71205;68241;47767;-427;-427;-427
chr3	43812251	43812599	349	*	Distal Intergenic	3	43732375	43764217	31843	1	51099	uc003cmx.3	79876	ENSG00000011198	ABHD5	abhydrolase domain containing 5, lysophosphatidic acid acyltransferase	uc003cmx.3	51099	79876
chr3	44481351	44481649	299	*	3' UTR	3	44481262	44497188	15927	2	353274	uc011azv.1	15539	ENSG00000185219	ZNF445	zinc finger protein 445	uc010him.3;uc003cnd.4;uc003cne.4;uc011azv.1;uc003cnf.2;uc011azw.1	285343;285343;285343;353274;353274;353274	101740;101407;101407;0;0;0
chr3	45615501	45615949	449	*	Distal Intergenic	3	45636323	45722755	86433	1	8994	uc003coq.3	-20374	ENSG00000144791	LIMD1	LIM domain containing 1	uc003cop.1;uc010hit.1;uc003coq.3	23395;23395;8994	185426;185426;-20374
chr3	46474701	46474949	249	*	Distal Intergenic	3	46449074	46451014	1941	1	9034	uc010hjf.3	25627	ENSG00000121797	CCRL2	C-C motif chemokine receptor like 2	uc003fzr.3;uc003cpq.3;uc010hjh.3;uc003cpr.3;uc003cpp.4;uc010hjg.3;uc010hjf.3	4057;4057;4057;4057;9034;9034;9034	30212;31649;31649;51775;25980;25652;25627
chr3	46550701	46551249	549	*	Distal Intergenic	3	46539485	46542439	2955	1	83597	uc003cps.1	11216	ENSG00000163825	RTP3	receptor transporter protein 3	uc003fzr.3;uc003cpq.3;uc010hjh.3;uc003cpr.3;uc010hji.3;uc003cpu.4;uc003cps.1;uc031rzg.1	4057;4057;4057;4057;79442;79442;83597;83598	-45540;-44103;-44103;-23977;56791;70323;11216;-47639
chr3	47448051	47448199	149	*	Exon (uc011baw.1/25930, exon 7 of 19)	3	47422491	47454931	32441	1	25930	uc011bay.1	25560	ENSG00000076201	PTPN23	protein tyrosine phosphatase non-receptor type 23	uc003crg.2;uc003crh.1;uc011baz.1;uc011baw.1;uc003crf.1;uc011bax.1;uc011bay.1	22937;22937;22937;25930;25930;25930;25930	69246;69246;69246;0;0;0;0
chr3	48585651	48585799	149	*	Intron (uc003ctv.3/5210, intron 3 of 13)	3	48555117	48594227	39111	2	5210	uc003ctv.3	8428	ENSG00000114268	PFKFB4	6-phosphofructo-2-kinase/fructose-2,6-biphosphatase 4	uc021wxp.1;uc003ctz.2;uc003cto.1;uc003ctp.2;uc031rzq.1;uc003cts.2;uc031rzr.1;uc003ctv.3;uc003ctw.3;uc003ctx.3;uc010hkb.3;uc010hkc.3;uc011bbm.2;uc011bbn.1;uc003cty.1	100313843;1294;51246;51246;51246;51246;51246;5210;5210;5210;5210;5210;5210;5210;90226	30611;46794;-44168;-43969;-43969;-43404;-43392;0;0;0;0;0;0;0;15402
chr3	48700251	48700499	249	*	Promoter (<=1kb)	3	48673896	48700348	26453	2	1951	uc003cul.3	0	ENSG00000008300	CELSR3	cadherin EGF LAG seven-pass G-type receptor 3	uc021wxq.1;uc003cuf.1;uc010hkf.3;uc010hkg.3;uc003cul.3;uc011bbo.2;uc003cup.3;uc003cuq.3;uc003cur.3;uc003cus.3;uc003cut.3;uc011bbq.2;uc011bbr.2;uc011bbs.2;uc011bbt.2;uc011bbu.2;uc011bbv.2;uc003cum.3;uc003cun.3;uc010hkh.2;uc003cug.3;uc003cuh.3;uc003cui.3;uc003cuj.3;uc003cuk.3;uc010hke.3;uc011bbp.2	100616112;1951;1951;1951;1951;440955;51447;51447;51447;51447;51447;51447;51447;51447;51447;51447;51447;51517;51517;51517;65010;65010;65010;65010;65010;65010;65010	-18538;0;-18888;-10770;0;-41062;54421;54421;54421;54421;54421;54421;54421;54421;54421;54421;54421;22835;22835;22835;-28972;-27325;-27325;-27325;-27325;-27325;-27325
chr3	48700951	48701449	499	*	Promoter (<=1kb)	3	48673896	48700348	26453	2	1951	uc003cul.3	-603	ENSG00000008300	CELSR3	cadherin EGF LAG seven-pass G-type receptor 3	uc021wxq.1;uc003cuf.1;uc010hkf.3;uc010hkg.3;uc003cul.3;uc011bbo.2;uc003cup.3;uc003cuq.3;uc003cur.3;uc003cus.3;uc003cut.3;uc011bbq.2;uc011bbr.2;uc011bbs.2;uc011bbt.2;uc011bbu.2;uc011bbv.2;uc003cum.3;uc003cun.3;uc010hkh.2;uc003cug.3;uc003cuh.3;uc003cui.3;uc003cuj.3;uc003cuk.3;uc010hke.3;uc011bbp.2	100616112;1951;1951;1951;1951;440955;51447;51447;51447;51447;51447;51447;51447;51447;51447;51447;51447;51517;51517;51517;65010;65010;65010;65010;65010;65010;65010	-19238;0;-19588;-11470;0;-41762;53471;53471;53471;53471;53471;53471;53471;53471;53471;53471;53471;21885;21885;21885;-29672;-28025;-28025;-28025;-28025;-28025;-28025
chr3	49058801	49059049	249	*	Promoter (<=1kb)	3	49059074	49060926	1853	1	25915	uc003cvq.3	-25	ENSG00000178057	NDUFAF3	NADH:ubiquinone oxidoreductase complex assembly factor 3	uc003cvb.3;uc003cvc.3;uc003cvf.3;uc010hkl.3;uc011bbx.1;uc003cvj.2;uc010hkn.2;uc011bby.1;uc011bbz.1;uc003cvn.3;uc003cvp.3;uc003cvq.3;uc003cvr.3;uc003cvt.3;uc003cvo.1;uc011bcb.1;uc003cvg.3;uc003cvh.3;uc010hkm.1;uc010hkq.3;uc003cvu.3;uc003cvv.3;uc003cvk.2;uc003cvl.2;uc003cvm.2;uc010hko.2;uc011bca.2	10425;10425;10425;10425;11180;11180;11180;11180;11180;25915;25915;25915;25915;3615;406966;494337;54681;54681;54681;54870;54870;54870;55152;55152;55152;55152;55152	102520;102520;94650;93906;14164;14164;14164;14164;13760;0;0;-25;-25;7826;-659;-1134;31460;31460;20295;71853;72455;72455;-2760;-2760;-297;-297;-2760
chr3	49208851	49209149	299	*	Promoter (<=1kb)	3	49209018	49213919	4902	1	200942	uc003cwh.3	0	ENSG00000185909	KLHDC8B	kelch domain containing 8B	uc003cwh.3;uc003cwi.1;uc010hkr.3;uc003cwk.2;uc010hkt.3;uc003cwl.4;uc011bck.1;uc003cwe.3;uc003cwf.1;uc021wxt.1;uc003cwg.4	200942;200942;22973;339834;339834;339834;339834;3913;3913;646498;64925	0;-2523;-17017;0;0;0;0;-38252;-38300;20142;-5066
chr3	49275951	49276199	249	*	Intron (uc003cwk.2/339834, intron 5 of 9)	3	49311553	49311619	67	1	100422952	uc021wxu.1	-35354	ENSG00000264633	MIR4271	microRNA 4271	uc021wxu.1;uc003cwk.2;uc010hkt.3;uc003cwl.4;uc011bck.1;uc003cwm.2;uc003cwn.2;uc021wxt.1;uc003cwp.2;uc003cwq.2;uc003cwr.2	100422952;339834;339834;339834;339834;375341;375341;646498;7375;7375;7375	-35354;0;0;0;0;35768;38309;-46660;74097;101337;101337
chr3	49710851	49711199	349	*	Promoter (<=1kb)	3	49711435	49720781	9347	1	327	uc010hkw.1	-236	ENSG00000164062	APEH	acylaminoacyl-peptide hydrolase	uc003cxk.1;uc003cxl.1;uc010hkw.1;uc003cxf.3;uc003cxj.3;uc003cxg.3;uc011bcs.1;uc010hkx.2;uc011bct.1;uc011bcu.1;uc003cxh.4;uc010hky.1;uc003cxi.3;uc003cxe.4	29925;29925;327;327;386724;4485;4485;4485;4485;4485;63891;63891;63891;8927	50185;50185;-236;-236;46039;14997;14997;14997;14997;14997;-15751;-25702;-25702;118929
chr3	49726451	49726699	249	*	Promoter (<=1kb)	3	49726950	49758962	32013	1	63891	uc003cxh.4	-251	ENSG00000164068	RNF123	ring finger protein 123	uc003cxk.1;uc003cxl.1;uc010hkw.1;uc003cxf.3;uc003cxj.3;uc003cxg.3;uc011bcs.1;uc010hkx.2;uc011bct.1;uc011bcu.1;uc003cxh.4;uc010hky.1;uc003cxi.3;uc003cxe.4;uc021wyl.1;uc003cxm.1;uc003cxn.1;uc031rzt.1	29925;29925;327;327;386724;4485;4485;4485;4485;4485;63891;63891;63891;8927;9807;9807;9807;9807	34685;34685;15016;15016;30539;-255;-255;-255;-255;-255;-251;-10202;-10202;134529;96928;97274;97274;97276
chr3	50336951	50337299	349	*	Promoter (<=1kb)	3	50330259	50336899	6641	2	8372	uc003czg.2	-52	ENSG00000186792	HYAL3	hyaluronidase 3	uc031rzz.1;uc003daj.1;uc003daa.1;uc003dab.1;uc003dac.2;uc003dad.1;uc003dae.1;uc003daf.1;uc010hlk.1;uc011bdq.1;uc003czy.1;uc003czz.2;uc003cyz.3;uc003czi.3;uc003czj.3;uc003czk.4;uc003cyo.1;uc003cyp.1;uc031rzx.1;uc003cyq.1;uc010hlg.1;uc011bdn.2;uc003cyr.1;uc003czm.4;uc003czn.4;uc003czo.4;uc003czp.4;uc003czq.4;uc003czr.4;uc003czs.3;uc003czt.4;uc003dag.1;uc010hll.1;uc010hlm.1;uc011bdp.2;uc003czb.3;uc0…	10641;10641;11186;11186;11186;11186;11186;11186;11186;11186;11334;11334;132228;24142;24142;24142;2771;2771;2771;2771;2771;2771;2771;3373;3373;3373;3373;3373;3373;3373;3373;51364;51364;51364;7866;7866;7869;7869;7869;7869;7869;7869;7869;7869;7869;8372;8372;8372;8372;8372;8692;8692;8692;8692	50914;51187;32298;37596;38365;0;0;0;0;0;28369;28369;20433;-631;-52;-52;73227;73227;70454;63304;63304;52625;48110;3733;3733;3733;3733;3733;3733;12513;3733;0;0;45824;-6925;-6602;31911;31911;31911;30645;30645;30358;28959;26363;26363;-631;-52;-52;-52;-52;0;0;0;0
chr3	50358851	50359249	399	*	Promoter (<=1kb)	3	50355221	50360213	4993	2	8692	uc003czx.3	964	ENSG00000068001	HYAL2	hyaluronidase 2	uc031rzz.1;uc003daj.1;uc003dal.3;uc003dam.3;uc003dan.1;uc003daa.1;uc003dab.1;uc003dac.2;uc003dad.1;uc003dae.1;uc003daf.1;uc010hlk.1;uc011bdq.1;uc003czy.1;uc003czz.2;uc003cyz.3;uc003czi.3;uc003czj.3;uc003czk.4;uc003czm.4;uc003czn.4;uc003czo.4;uc003czp.4;uc003czq.4;uc003czr.4;uc003czs.3;uc003czt.4;uc003dag.1;uc010hll.1;uc010hlm.1;uc011bdp.2;uc003czb.3;uc010hlh.1;uc003cyt.3;uc003cyu.3;uc003cyv.3;uc0…	10641;10641;11068;11068;11070;11186;11186;11186;11186;11186;11186;11186;11186;11334;11334;132228;24142;24142;24142;3373;3373;3373;3373;3373;3373;3373;3373;51364;51364;51364;7866;7866;7869;7869;7869;7869;7869;7869;7869;7869;7869;8372;8372;8372;8372;8372;8692;8692;8692;8692;9254;9254	28964;29237;-29048;-29048;37690;10348;15646;16415;0;0;0;0;0;6419;6419;42333;-22531;-21952;-21952;-17819;-17819;-17819;-17819;-17819;-17819;-9039;-17819;0;0;23874;-28825;-28502;53811;53811;53811;52545;52545;52258;50859;48263;48263;-22531;-21952;-21952;-21952;-21952;0;0;0;0;181643;181643
chr3	50377951	50378549	599	*	Promoter (<=1kb)	3	50367217	50378367	11151	2	11186	uc003dad.1	0	ENSG00000068028	RASSF1	Ras association domain family member 1	uc031rzz.1;uc003daj.1;uc003dal.3;uc003dam.3;uc003dan.1;uc003daa.1;uc003dab.1;uc003dac.2;uc003dad.1;uc003dae.1;uc003daf.1;uc010hlk.1;uc011bdq.1;uc003czy.1;uc003czz.2;uc003czi.3;uc003czj.3;uc003czk.4;uc003czm.4;uc003czn.4;uc003czo.4;uc003czp.4;uc003czq.4;uc003czr.4;uc003czs.3;uc003czt.4;uc003dag.1;uc010hll.1;uc010hlm.1;uc011bdp.2;uc003czb.3;uc021wyn.1;uc003czd.2;uc003cze.2;uc003czf.2;uc003czg.2;uc0…	10641;10641;11068;11068;11070;11186;11186;11186;11186;11186;11186;11186;11186;11334;11334;24142;24142;24142;3373;3373;3373;3373;3373;3373;3373;3373;51364;51364;51364;7866;7866;8372;8372;8372;8372;8372;8692;8692;8692;8692;9254;9254	9664;9937;-9748;-9748;18390;-8354;-3056;-2287;0;0;0;0;0;-12283;-12283;-41631;-41052;-41052;-36919;-36919;-36919;-36919;-36919;-36919;-28139;-36919;0;0;4574;-47925;-47602;-41631;-41052;-41052;-41052;-41052;0;0;0;0;162343;162343
chr3	50577001	50577249	249	*	Distal Intergenic	3	50595456	50605223	9768	2	51161	uc003dar.3	27974	ENSG00000088543	C3orf18	chromosome 3 open reading frame 18	uc003dar.3;uc003das.3;uc010hlo.3;uc010hlp.3;uc011bdr.3;uc003dat.3;uc003dau.3;uc003dav.3;uc003dap.3;uc003daq.3	51161;51161;51161;51161;51161;51161;51409;51409;9254;9254	27974;27974;27974;27974;27974;31209;-29334;-29660;-36109;-36109
chr3	50638501	50638849	349	*	Distal Intergenic	3	50643885	50649262	5378	2	1154	uc003dax.3	10413	ENSG00000114737	CISH	cytokine inducible SH2 containing protein	uc003dax.3;uc010hlq.3;uc003dar.3;uc003das.3;uc010hlo.3;uc010hlp.3;uc011bdr.3;uc003dat.3;uc003dau.3;uc003dav.3;uc003day.2;uc003daz.2;uc003dba.2;uc010hlr.2	1154;1154;51161;51161;51161;51161;51161;51161;51409;51409;7867;7867;7867;7867	0;0;-33278;-33278;-33278;-33278;-33278;-30043;31918;31592;0;-15713;-15713;-16083
chr3	50648801	50649799	999	*	Promoter (<=1kb)	3	50643885	50649262	5378	2	1154	uc003dax.3	0	ENSG00000114737	CISH	cytokine inducible SH2 containing protein	uc003dax.3;uc010hlq.3;uc003dar.3;uc003das.3;uc010hlo.3;uc010hlp.3;uc011bdr.3;uc003dat.3;uc003dau.3;uc003dav.3;uc003day.2;uc003daz.2;uc003dba.2;uc010hlr.2	1154;1154;51161;51161;51161;51161;51161;51161;51409;51409;7867;7867;7867;7867	0;0;-43578;-43578;-43578;-43578;-43578;-40343;42218;41892;0;-4763;-4763;-5133
chr3	51720601	51720749	149	*	Intron (uc003dbk.5/51368, intron 3 of 4)	3	51705643	51738339	32697	1	51368	uc031sac.1	14958	ENSG00000164081	TEX264	testis expressed 264, ER-phagy receptor	uc003dbh.3;uc011bdt.2;uc011bdu.2;uc003dbj.3;uc003dbo.4;uc010hlu.3;uc010hlv.3;uc003dbk.5;uc010hls.4;uc010hlt.4;uc021wyt.2;uc031saa.1;uc003dbm.4;uc021wyu.1;uc031sab.1;uc031sac.1	23132;23132;23132;23132;2912;2912;2912;51368;51368;51368;51368;51368;51368;51368;51368;51368	145005;145005;57251;56313;-20332;-20332;-20332;0;0;0;0;0;0;0;0;0
chr3	52444051	52444699	649	*	Promoter (<=1kb)	3	52444527	52457657	13131	1	51533	uc003ddy.3	0	ENSG00000010318	PHF7	PHD finger protein 7	uc003dec.2;uc031sad.1;uc003ded.4;uc011bef.2;uc003ddv.3;uc003ddy.3;uc003ddz.3;uc003dea.1;uc003deb.3;uc003ddw.4;uc010hmg.4;uc010hmh.4;uc003ddx.4	11188;11188;11188;25981;25981;51533;51533;56920;7134;8314;8314;8314;8314	-44825;-44825;-44825;93716;25249;0;0;34344;43358;-6141;-6141;-5449;0
chr3	53163451	53163699	249	*	Promoter (<=1kb)	3	53122501	53164470	41970	2	91869	uc003dgj.3	771	ENSG00000163933	RFT1	RFT1 homolog	uc003dgl.3;uc003dgm.3;uc003dgn.2;uc003dgj.3	5580;5580;5580;91869	-31524;-31524;-48721;0
chr3	57542451	57542749	299	*	Promoter (<=1kb)	3	57541981	57547768	5788	1	201626	uc003diw.4	470	ENSG00000174840	PDE12	phosphodiesterase 12	uc003dit.2;uc003diu.2;uc003div.3;uc003diw.4;uc003dix.4	201625;201625;201626;201626;378	-12380;-12380;0;0;40466
chr3	60975751	60976199	449	*	Intron (uc003dkx.4/2272, intron 3 of 9)	3	59735036	61237133	1502098	2	2272	uc003dkx.4	260934	ENSG00000189283	FHIT	fragile histidine triad diadenosine triphosphatase	uc003dkx.4;uc003dky.3;uc010hnn.1	2272;2272;2272	0;0;0
chr3	72193901	72194449	549	*	Distal Intergenic	3	72200408	72223490	23083	1	201617	uc003dpd.2	-5959	ENSG00000243083	LINC00870	long intergenic non-protein coding RNA 870	uc003dpd.2	201617	-5959
chr3	72338151	72338399	249	*	Distal Intergenic	3	72200408	72223490	23083	1	201617	uc003dpd.2	137743	ENSG00000243083	LINC00870	long intergenic non-protein coding RNA 870	NA	NA	NA
chr3	73159801	73160199	399	*	Distal Intergenic	3	73110810	73112471	1662	1	55096	uc003dpj.3	48991	ENSG00000255423	EBLN2	endogenous Bornavirus like nucleoprotein 2	uc003dph.1;uc003dpi.1;uc003dpj.3	151987;151987;55096	113682;113682;48991
chr3	81810801	81811049	249	*	Promoter (<=1kb)	3	81538850	81810950	272101	2	2632	uc021xav.1	0	ENSG00000114480	GBE1	1,4-alpha-glucan branching enzyme 1	uc021xav.1;uc021xax.1	2632;2632	0;-18021
chr3	88108451	88108749	299	*	Promoter (<=1kb)	3	88101100	88108146	7047	2	8545	uc003dqt.3	-305	ENSG00000163320	CGGBP1	CGG triplet repeat binding protein 1	uc003dqs.3;uc003dqt.3;uc003dqu.3	8545;8545;8545	-305;-305;0
chr3	90347151	90347699	549	*	Distal Intergenic	3	89156674	89531284	374611	1	2042	uc003dqy.3	1190477	ENSG00000044524	EPHA3	EPH receptor A3	NA	NA	NA
chr3	90355301	90355549	249	*	Distal Intergenic	3	89156674	89531284	374611	1	2042	uc003dqy.3	1198627	ENSG00000044524	EPHA3	EPH receptor A3	NA	NA	NA
chr3	90397651	90397699	49	*	Distal Intergenic	3	89156674	89531284	374611	1	2042	uc003dqy.3	1240977	ENSG00000044524	EPHA3	EPH receptor A3	NA	NA	NA
chr3	90403001	90403299	299	*	Distal Intergenic	3	89156674	89531284	374611	1	2042	uc003dqy.3	1246327	ENSG00000044524	EPHA3	EPH receptor A3	NA	NA	NA
chr3	90440351	90440499	149	*	Distal Intergenic	3	89156674	89531284	374611	1	2042	uc003dqy.3	1283677	ENSG00000044524	EPHA3	EPH receptor A3	NA	NA	NA
chr3	90452401	90452649	249	*	Distal Intergenic	3	89156674	89531284	374611	1	2042	uc003dqy.3	1295727	ENSG00000044524	EPHA3	EPH receptor A3	NA	NA	NA
chr3	90460551	90460999	449	*	Distal Intergenic	3	89156674	89531284	374611	1	2042	uc003dqy.3	1303877	ENSG00000044524	EPHA3	EPH receptor A3	NA	NA	NA
chr3	90467551	90468049	499	*	Distal Intergenic	3	89156674	89531284	374611	1	2042	uc003dqy.3	1310877	ENSG00000044524	EPHA3	EPH receptor A3	NA	NA	NA
chr3	90474401	90474949	549	*	Distal Intergenic	3	89156674	89531284	374611	1	2042	uc003dqy.3	1317727	ENSG00000044524	EPHA3	EPH receptor A3	NA	NA	NA
chr3	90478501	90478949	449	*	Distal Intergenic	3	89156674	89531284	374611	1	2042	uc003dqy.3	1321827	ENSG00000044524	EPHA3	EPH receptor A3	NA	NA	NA
chr3	90493551	90493649	99	*	Distal Intergenic	3	89156674	89531284	374611	1	2042	uc003dqy.3	1336877	ENSG00000044524	EPHA3	EPH receptor A3	NA	NA	NA
chr3	90501151	90501549	399	*	Distal Intergenic	3	89156674	89531284	374611	1	2042	uc003dqy.3	1344477	ENSG00000044524	EPHA3	EPH receptor A3	NA	NA	NA
chr3	90503651	90503849	199	*	Distal Intergenic	3	89156674	89531284	374611	1	2042	uc003dqy.3	1346977	ENSG00000044524	EPHA3	EPH receptor A3	NA	NA	NA
chr3	97629901	97630099	199	*	Intron (uc021xbn.2/131544, intron 15 of 21)	3	97666205	97686476	20272	2	84864	uc010hpa.1	56377	ENSG00000170854	RIOX2	ribosomal oxygenase 2	uc021xbn.2;uc003drz.2;uc003dsa.2;uc003dsb.1;uc003dsc.1;uc010hpa.1;uc010hpb.2	131544;84864;84864;84864;84864;84864;84864	0;61196;61196;61196;61196;56377;61196
chr3	98311801	98312599	799	*	Promoter (<=1kb)	3	98298290	98312455	14166	2	1371	uc003dsx.3	0	ENSG00000080819	CPOX	coproporphyrinogen oxidase	uc003dsx.3;uc011bgz.2	1371;1371	0;0
chr3	101249201	101249549	349	*	Distal Intergenic	3	101237711	101242731	5021	1	131909	uc003duy.1	11490	NA	ARB2BP	ARB2 family member B, pseudogene	uc003duy.1;uc003duz.4;uc003dva.3;uc003dvb.3;uc003dvc.3;uc003dvd.3;uc003dut.3;uc003duu.3;uc003duv.3;uc003duw.3;uc003dux.3	131909;54931;57092;57092;57092;57092;57337;57337;57337;57337;57337	11490;-31131;-43493;-43493;-43493;-43493;-17116;-17116;-17116;-17116;-17116
chr3	107725101	107725549	449	*	Distal Intergenic	3	107761941	107809935	47995	2	961	uc003dwt.1	84386	ENSG00000196776	CD47	CD47 molecule	uc003dwt.1;uc003dwv.1	961;961	84386;84386
chr3	112020951	112021199	249	*	Distal Intergenic	3	111859752	112013074	153323	2	285335	uc010hqc.3	-7877	ENSG00000172139	SLC9C1	solute carrier family 9 member C1	uc011bhu.2;uc003dyu.3;uc010hqc.3;uc010hqd.1;uc003dyw.3;uc003dyx.3;uc003dyy.3;uc003dyz.3	285335;285335;285335;4345;4345;4345;4345;4345	-15226;-7877;-7877;-30717;-30717;-30717;-30717;-30717
chr3	122283151	122283399	249	*	Promoter (<=1kb)	3	122283185	122294049	10865	1	151636	uc003efk.3	0	ENSG00000163840	DTX3L	deltex E3 ubiquitin ligase 3L	uc003efk.3;uc010hrj.3;uc003efm.2;uc003efn.2;uc003efo.1;uc003efe.2;uc010hrh.2;uc003eff.4;uc010hri.3;uc003efg.3;uc011bjs.2;uc003efh.3;uc003efi.3;uc003efj.2	151636;151636;165631;165631;165631;3836;3836;83666;83666;83666;83666;83666;83666;83666	0;0;-13050;-13050;-29972;-49365;-49365;-4;-4;0;0;0;0;0
chr3	125151901	125152399	499	*	Distal Intergenic	3	124950915	125094198	143284	2	7707	uc003ehy.3	-57703	ENSG00000163848	ZNF148	zinc finger protein 148	uc003eib.4;uc011bkf.3	8723;8723	86659;86659
chr3	125635101	125635449	349	*	Promoter (<=1kb)	3	125635444	125648867	13424	1	100125556	uc003eid.4	0	ENSG00000291071	FAM86JP	family with sequence similarity 86, member A pseudogene	uc003eid.4;uc003eif.4;uc003eig.2;uc021xdh.1	100125556;100125556;200810;200810	0;0;20438;20438
chr3	126074801	126075099	299	*	Promoter (1-2kb)	3	126061478	126076236	14759	2	28999	uc011bkk.1	1137	ENSG00000163884	KLF15	KLF transcription factor 15	uc011bkk.1;uc003eiu.1;uc010hsg.1	28999;348807;348807	0;-38683;-39686
chr3	128205401	128206499	1099	*	Promoter (<=1kb)	3	128198265	128206764	8500	2	2624	uc003ekn.3	265	ENSG00000179348	GATA2	GATA binding protein 2	uc003ekk.2;uc003ekn.3;uc003ekm.3;uc003eko.2;uc003ekl.1;uc011bkp.2	165721;2624;2624;2624;285224;90246	-19310;0;0;0;22964;-20179
chr3	128208251	128209599	1349	*	Promoter (<=1kb)	3	128198265	128207373	9109	2	2624	uc003ekm.3	-878	ENSG00000179348	GATA2	GATA binding protein 2	uc003ekk.2;uc003ekn.3;uc003ekm.3;uc003eko.2;uc003ekl.1;uc011bkp.2	165721;2624;2624;2624;285224;90246	-22160;0;0;0;25814;-17079
chr3	128564601	128564949	349	*	Distal Intergenic	3	128580351	128590384	10034	2	653712	uc021xdm.1	25435	NA	IFT122P3	IFT122 pseudogene 3	uc010hsw.1;uc003ela.4;uc003elb.3;uc011bks.2;uc021xdm.1;uc003eks.1;uc010hsv.1	28976;28976;28976;28976;653712;7879;7879	-33384;-33384;-33384;-33384;25435;119622;119622
chr3	129180651	129180999	349	*	Promoter (<=1kb)	3	129180152	129207240	27089	1	55764	uc011bkz.1	499	ENSG00000163913	IFT122	intraflagellar transport 122	uc011bkx.1;uc003eml.3;uc003emm.3;uc003emn.3;uc003emo.3;uc003emp.3;uc010htc.3;uc011bky.2;uc011bkz.1;uc003emr.3;uc011bla.2;uc010htd.1;uc010hte.3;uc003ems.3;uc003emh.2;uc003emi.2;uc003emj.2;uc003emk.2;uc011bkw.2;uc003emg.3	55764;55764;55764;55764;55764;55764;55764;55764;55764;55764;55764;55764;55764;55764;8930;8930;8930;8930;8930;90288	0;0;0;0;0;0;0;0;0;-965;-965;-19361;-25350;-26035;-21629;-21629;-21629;-21629;-21629;-33157
chr3	132022251	132022499	249	*	Distal Intergenic	3	132036211	132077690	41480	1	55	uc003eon.3	-13712	ENSG00000014257	ACP3	acid phosphatase 3	uc003eom.3;uc003eon.3;uc010htp.2;uc003eop.4	131034;55;55;55	-17997;-13712;-13712;-13712
chr3	132600801	132600999	199	*	Distal Intergenic	3	132757171	133116619	359449	1	66000	uc003eph.3	-156172	ENSG00000144868	TMEM108	transmembrane protein 108	uc003epg.1	348808	159615
chr3	134204501	134205749	1249	*	Promoter (<=1kb)	3	134196546	134204831	8286	2	25847	uc003eqj.3	0	ENSG00000129055	ANAPC13	anaphase promoting complex subunit 13	uc021xeh.1;uc003eqj.3;uc003eqi.3;uc003eqk.4;uc003eql.1;uc003eqm.3;uc003eqn.1;uc003eqo.1	100616281;25847;25847;25847;80254;80254;80254;80254	47832;0;0;0;0;0;0;0
chr3	136470301	136470749	449	*	Promoter (<=1kb)	3	136055999	136471245	415247	2	10274	uc003era.1	496	ENSG00000118007	STAG1	STAG1 cohesin complex component	uc003era.1;uc003erb.1;uc003erc.1;uc010hua.1;uc003ere.3	10274;10274;10274;10274;10274	0;0;0;0;0
chr3	138594601	138595199	599	*	Distal Intergenic	3	138663066	138665982	2917	2	668	uc003esw.3	70783	ENSG00000183770	FOXL2	forkhead box L2	NA	NA	NA
chr3	138840451	138840599	149	*	Intron (uc003eta.3/60467, intron 2 of 2)	3	138823027	138844005	20979	1	60467	uc003eta.3	17424	ENSG00000232416	BPESC1	blepharophimosis, epicanthus inversus and ptosis candidate 1	uc003eta.3	60467	0
chr3	141457501	141457749	249	*	Promoter (<=1kb)	3	141457051	141465645	8595	1	9616	uc021xeu.1	450	ENSG00000114125	RNF7	ring finger protein 7	uc011bnd.2;uc003euc.3;uc003eud.3;uc003eue.3;uc021xet.1;uc021xeu.1	131890;9616;9616;9616;9616;9616	-39294;0;0;0;0;0
chr3	142803801	142804199	399	*	Distal Intergenic	3	142838618	142842856	4239	1	9435	uc003evm.3	-34419	ENSG00000175040	CHST2	carbohydrate sulfotransferase 2	uc003evh.1;uc003evi.1;uc003evj.1;uc003evk.1;uc003evl.1;uc003evm.3	23350;23350;23350;23350;23350;9435	83429;83429;83420;83420;59177;-34419
chr3	143002201	143002599	399	*	Intron (uc003evn.3/285195, intron 14 of 15)	3	143061088	143065913	4826	1	100885796	uc031sbu.1	-58489	ENSG00000240012	SLC9A9-AS1	SLC9A9 antisense RNA 1	uc003evn.3	285195	0
chr3	145401201	145401599	399	*	Distal Intergenic	3	145787228	145804522	17295	2	5352	uc003evq.1	402923	ENSG00000152952	PLOD2	procollagen-lysine,2-oxoglutarate 5-dioxygenase 2	NA	NA	NA
chr3	148897951	148898149	199	*	Promoter (<=1kb)	3	148890290	148897920	7631	2	1356	uc003eww.4	-31	ENSG00000047457	CP	ceruloplasmin	uc011bnr.3;uc003eww.4;uc003ewx.4;uc003ewy.4;uc003ewz.3;uc010hvf.1;uc003ewu.1;uc011bnq.1;uc021xfk.1;uc003ewv.1	1356;1356;1356;1356;1356;1356;84343;84343;84343;84343	0;-31;0;0;0;27255;50580;50580;50526;20118
chr3	150126501	150126799	299	*	Promoter (<=1kb)	3	150126788	150177615	50828	1	9819	uc003exv.3	0	ENSG00000196428	TSC22D2	TSC22 domain family member 2	uc003exv.3;uc003exw.3;uc003exx.3	9819;9819;9819	0;0;0
chr3	150127701	150129049	1349	*	Promoter (<=1kb)	3	150126788	150177615	50828	1	9819	uc003exx.3	913	ENSG00000196428	TSC22D2	TSC22 domain family member 2	uc003exv.3;uc003exw.3;uc003exx.3	9819;9819;9819	0;0;0
chr3	152016651	152016999	349	*	Promoter (<=1kb)	3	152016771	152018156	1386	1	4154	uc003ezk.1	0	ENSG00000152601	MBNL1	muscleblind like splicing regulator 1	uc011boe.2;uc011bof.3;uc003ezh.3;uc003ezi.3;uc003ezj.3;uc003ezk.1;uc003ezl.3;uc003ezm.3;uc003ezn.3;uc003ezo.3;uc003ezp.3;uc010hvo.3	401093;401093;4154;4154;4154;4154;4154;4154;4154;4154;4154;645843	-29236;-29236;0;0;0;0;-195;-195;-195;-195;-195;41780
chr3	155000551	155001149	599	*	Distal Intergenic	3	155008021	155011489	3469	2	100507537	uc003fah.2	10340	ENSG00000240045	STRIT1	small transmembrane regulator of ion transport 1	uc003fah.2	100507537	10340
chr3	155571551	155571899	349	*	Promoter (<=1kb)	3	155544301	155572248	27948	2	9197	uc003fan.4	349	ENSG00000169359	SLC33A1	solute carrier family 33 member 1	uc003fal.1;uc003fam.1;uc003faq.3;uc011bom.2;uc003fan.4;uc003fao.2	285315;285315;8833;8833;9197;9197	-47496;-47496;-16426;-16426;0;0
chr3	155583651	155583799	149	*	Distal Intergenic	3	155588325	155655520	67196	1	8833	uc003faq.3	-4526	ENSG00000163655	GMPS	guanine monophosphate synthase	uc003faq.3;uc011bom.2;uc003fan.4;uc003fao.2	8833;8833;9197;9197	-4526;-4526;0;0
chr3	156877101	156877649	549	*	Promoter (<=1kb)	3	156864297	156878482	14186	2	57018	uc003fbd.1	833	ENSG00000163660	CCNL1	cyclin L1	uc003fbc.3;uc003fbd.1;uc003fbe.3;uc003fbf.3;uc003fbg.3;uc011bor.2;uc003fbi.1	339894;57018;57018;57018;57018;57018;57018	-36310;0;-4646;0;0;0;0
chr3	156892601	156892899	299	*	Distal Intergenic	3	156866848	156878482	11635	2	57018	uc003fbi.1	-14119	ENSG00000163660	CCNL1	cyclin L1	uc003fbd.1;uc003fbe.3;uc003fbf.3;uc003fbg.3;uc011bor.2;uc003fbi.1	57018;57018;57018;57018;57018;57018	0;-20146;0;0;0;0
chr3	158852151	158852299	149	*	Intron (uc003fco.3/654502, intron 1 of 3)	3	158787041	158984096	197056	1	654502	uc010hvy.2	65110	ENSG00000214216	IQCJ	IQ motif containing J	uc003fcq.2;uc003fcr.2;uc003fco.3;uc003fcp.2;uc010hvy.2	100505385;100505385;654502;654502;654502	0;0;0;0;0
chr3	167751851	167752249	399	*	Intron (uc003ffe.2/27333, intron 8 of 15)	3	167727654	167813417	85764	2	27333	uc003ffe.2	61168	ENSG00000173905	GOLIM4	golgi integral membrane protein 4	uc003ffe.2;uc011bpe.1;uc011bpf.1;uc011bpg.1	27333;27333;27333;27333	0;0;0;0
chr3	167834151	167834299	149	*	Distal Intergenic	3	167727654	167813417	85764	2	27333	uc011bpg.1	-20734	ENSG00000173905	GOLIM4	golgi integral membrane protein 4	uc003ffe.2;uc011bpe.1;uc011bpf.1;uc011bpg.1	27333;27333;27333;27333	0;0;0;0
chr3	170074401	170074799	399	*	Promoter (<=1kb)	3	170075473	170114637	39165	1	6498	uc003fgu.3	-674	ENSG00000136603	SKIL	SKI like proto-oncogene	uc003fgu.3;uc011bps.2;uc003fgv.3;uc003fgw.3	6498;6498;6498;6498	-674;-674;-2612;-2612
chr3	170074951	170075299	349	*	Promoter (<=1kb)	3	170075473	170114637	39165	1	6498	uc003fgu.3	-174	ENSG00000136603	SKIL	SKI like proto-oncogene	uc003fgu.3;uc011bps.2;uc003fgv.3;uc003fgw.3	6498;6498;6498;6498	-174;-174;-2112;-2112
chr3	176914901	176915399	499	*	Promoter (<=1kb)	3	176738542	176915048	176507	2	79718	uc003fix.4	0	ENSG00000177565	TBL1XR1	TBL1X/Y related 1	uc003fiw.4;uc003fix.4;uc011bpz.2;uc003fiy.2	79718;79718;79718;79718	-635;0;0;0
chr3	176915501	176915799	299	*	Promoter (<=1kb)	3	176769292	176915048	145757	2	79718	uc003fiy.2	-453	ENSG00000177565	TBL1XR1	TBL1X/Y related 1	uc003fiw.4;uc003fix.4;uc011bpz.2;uc003fiy.2	79718;79718;79718;79718	-1235;0;0;0
chr3	177077701	177077999	299	*	Distal Intergenic	3	177159709	177470492	310784	1	100505566	uc031sch.1	-81710	ENSG00000228221	LINC00578	long intergenic non-protein coding RNA 578	NA	NA	NA
chr3	178750701	178751299	599	*	Intron (uc003fjg.3/64393, intron 2 of 5)	3	178735011	178789656	54646	2	64393	uc003fjg.3	38357	ENSG00000172667	ZMAT3	zinc finger matrin-type 3	uc003fjg.3;uc003fji.3	64393;64393	0;0
chr3	178755001	178755399	399	*	Intron (uc003fjg.3/64393, intron 2 of 5)	3	178735011	178789656	54646	2	64393	uc003fjg.3	34257	ENSG00000172667	ZMAT3	zinc finger matrin-type 3	uc003fjg.3;uc003fji.3	64393;64393	0;0
chr3	182511151	182511899	749	*	Promoter (<=1kb)	3	182511291	182554412	43122	1	23200	uc003fla.3	0	ENSG00000058063	ATP11B	ATPase phospholipid transporting 11B (putative)	uc003fla.3;uc003flb.3	23200;23200	0;0
chr3	183079051	183079249	199	*	Intron (uc003fli.1/23101, intron 3 of 29)	3	183016545	183118336	101792	2	23101	uc003flp.1	39087	ENSG00000053524	MCF2L2	MCF.2 cell line derived transforming sequence-like 2	uc003fli.1;uc003flj.1;uc003flp.1	23101;23101;23101	0;0;0
chr3	183735851	183736299	449	*	Promoter (<=1kb)	3	183718451	183735727	17277	2	10057	uc003fmi.3	-124	ENSG00000114770	ABCC5	ATP binding cassette subfamily C member 5	uc010hxl.3;uc011bqt.2;uc003fmg.3;uc003fmh.3;uc010hxm.3;uc010hxn.3;uc010hxo.3;uc003fmi.3;uc031scp.1;uc003fmk.3;uc003fmj.3;uc011bqu.2;uc011bqv.2;uc010hxp.3	10057;10057;10057;10057;10057;10057;10057;10057;100873982;170572;200909;200909;200909;200909	-3616;-3616;-124;-124;-124;-124;-124;-124;11725;-34536;-13033;-13231;-14320;-16546
chr3	184037801	184038049	249	*	Promoter (<=1kb)	3	184038101	184053146	15046	1	1981	uc003fnx.3	-52	ENSG00000114867	EIF4G1	eukaryotic translation initiation factor 4 gamma 1	uc003foh.4;uc003foi.4;uc010hya.3;uc011brl.3;uc011brm.3;uc011brn.2;uc003foc.3;uc003fod.2;uc003foe.3;uc003fog.3;uc003fno.2;uc010hxw.2;uc003fnp.3;uc003fnq.3;uc003fnr.3;uc003fns.3;uc003fnt.3;uc010hxx.3;uc010hxy.3;uc010hxz.2;uc003fnv.4;uc003fnw.3;uc003fnx.3;uc003fok.2;uc003fnn.1;uc011brj.1;uc011brk.1;uc003fnz.3;uc003fni.4;uc011brg.1;uc011brh.1;uc003fnk.4;uc003fnl.4;uc003fnm.4;uc011bri.1;uc010hxv.3	1181;1181;1181;1181;1181;1181;131408;131408;131408;131408;1981;1981;1981;1981;1981;1981;1981;1981;1981;1981;1981;1981;1981;5437;5708;5708;5708;692107;9718;9718;9718;9718;9718;9718;9718;9718	36833;41390;41390;41390;41390;41390;-15668;-17227;-17227;-20209;0;0;0;0;0;0;0;0;0;0;0;0;-52;-43145;20779;19432;19432;-5435;70356;44002;44002;44002;44002;44002;43532;43121
chr3	187463151	187463599	449	*	Promoter (<=1kb)	3	187439165	187463513	24349	2	604	uc003frq.2	0	ENSG00000113916	BCL6	BCL6 transcription repressor	uc021xio.1;uc003fro.1;uc011bsf.1;uc003frp.3;uc010hza.2;uc003frq.2	100131635;344892;604;604;604;604	42997;-42806;-10456;-8866;-8866;0
chr3	194208851	194209249	399	*	Promoter (<=1kb)	3	194207869	194239008	31140	1	401106	uc003fua.2	982	NA	ATP13A3-DT	ATP13A3 divergent transcript	uc021xja.1;uc003fua.2;uc003fty.4;uc003ftz.1	401106;401106;79572;79572	0;0;-19883;-36081
chr3	195634501	195634699	199	*	Promoter (1-2kb)	3	195590236	195635880	45645	2	10188	uc003fvu.1	1181	ENSG00000061938	TNK2	tyrosine kinase non receptor 2	uc003fvq.1;uc003fvr.1;uc003fvs.1;uc003fvt.1;uc003fvu.1;uc010hzw.1;uc003fvv.1;uc010hzx.1	10188;10188;10188;10188;10188;10188;10188;10188	-37940;-35160;-14855;-12069;0;-11697;-21825;0
chr3	195634851	195635099	249	*	Promoter (<=1kb)	3	195590236	195635880	45645	2	10188	uc003fvu.1	781	ENSG00000061938	TNK2	tyrosine kinase non receptor 2	uc003fvq.1;uc003fvr.1;uc003fvs.1;uc003fvt.1;uc003fvu.1;uc010hzw.1;uc003fvv.1;uc010hzx.1	10188;10188;10188;10188;10188;10188;10188;10188	-38290;-35510;-15205;-12419;0;-12047;-22175;0
chr3	195775151	195775449	299	*	Distal Intergenic	3	195776155	195808961	32807	2	7037	uc003fvz.4	33512	ENSG00000072274	TFRC	transferrin receptor	uc003fvz.4;uc003fwa.4;uc010hzy.3;uc011btr.2	7037;7037;7037;7037	0;0;0;0
chr3	195807801	195809299	1499	*	Promoter (<=1kb)	3	195776155	195808961	32807	2	7037	uc003fvz.4	0	ENSG00000072274	TFRC	transferrin receptor	uc003fvz.4;uc003fwa.4;uc010hzy.3;uc011btr.2	7037;7037;7037;7037	0;0;0;0
chr3	195920751	195921099	349	*	Distal Intergenic	3	195924323	195938300	13978	2	131540	uc003fwc.3	17201	ENSG00000163958	ZDHHC19	zinc finger DHHC-type palmitoyltransferase 19	uc003fwc.3;uc010hzz.3;uc010iaa.3;uc010iab.3;uc011btu.1;uc003fwd.3;uc010iac.1;uc003fwe.3;uc011bts.2;uc011btt.2;uc003fwg.3;uc003fwh.3	131540;131540;131540;131540;200931;200931;200931;200931;401109;401109;5130;5130	17201;17201;17201;17201;-22284;-22284;-33296;-33713;51244;51125;93485;93485
chr3	195921601	195921899	299	*	Distal Intergenic	3	195924323	195938300	13978	2	131540	uc003fwc.3	16401	ENSG00000163958	ZDHHC19	zinc finger DHHC-type palmitoyltransferase 19	uc003fwc.3;uc010hzz.3;uc010iaa.3;uc010iab.3;uc011btu.1;uc003fwd.3;uc010iac.1;uc003fwe.3;uc011bts.2;uc011btt.2;uc003fwg.3;uc003fwh.3	131540;131540;131540;131540;200931;200931;200931;200931;401109;401109;5130;5130	16401;16401;16401;16401;-21484;-21484;-32496;-32913;52094;51975;92685;92685
chr3	196358701	196359699	999	*	Distal Intergenic	3	196366656	196388874	22219	1	375387	uc003fwv.3	-6957	ENSG00000174004	NRROS	negative regulator of reactive oxygen species	uc010iai.3;uc003fwv.3	200933;375387	62976;-6957
chr4	27251	27449	199	*	Distal Intergenic	4	53227	68380	15154	1	152687	uc010iay.2	-25778	ENSG00000272602	ZNF595	zinc finger protein 595	uc010iay.2;uc003fzv.1;uc011bus.1;uc011but.1;uc003fzu.1;uc003fzt.4	152687;152687;152687;152687;152687;255403	0;0;0;0;0;0
chr4	27651	28299	649	*	Distal Intergenic	4	53227	68380	15154	1	152687	uc010iay.2	-24928	ENSG00000272602	ZNF595	zinc finger protein 595	uc010iay.2;uc003fzv.1;uc011bus.1;uc011but.1;uc003fzu.1;uc003fzt.4	152687;152687;152687;152687;152687;255403	0;0;0;0;0;0
chr4	36101	36949	849	*	Distal Intergenic	4	53227	68380	15154	1	152687	uc010iay.2	-16278	ENSG00000272602	ZNF595	zinc finger protein 595	uc010iay.2;uc003fzv.1;uc011bus.1;uc011but.1;uc003fzu.1;uc003fzt.4	152687;152687;152687;152687;152687;255403	0;0;0;0;0;0
chr4	49401	49899	499	*	Distal Intergenic	4	53227	68380	15154	1	152687	uc010iay.2	-3328	ENSG00000272602	ZNF595	zinc finger protein 595	uc010iay.2;uc003fzv.1;uc011bus.1;uc011but.1;uc003fzu.1;uc003fzt.4	152687;152687;152687;152687;152687;255403	0;0;0;0;0;0
chr4	60001	60399	399	*	Exon (uc010iay.2/152687, exon 3 of 4)	4	53227	156490	103264	1	255403	uc003fzt.4	6774	ENSG00000250312	ZNF718	zinc finger protein 718	uc010iay.2;uc003fzv.1;uc011bus.1;uc011but.1;uc003fzu.1;uc003fzt.4	152687;152687;152687;152687;152687;255403	0;0;0;0;0;0
chr4	62101	62399	299	*	Intron (uc010iay.2/152687, intron 3 of 3)	4	53227	156490	103264	1	255403	uc003fzt.4	8874	ENSG00000250312	ZNF718	zinc finger protein 718	uc010iay.2;uc003fzv.1;uc011bus.1;uc011but.1;uc003fzu.1;uc003fzt.4	152687;152687;152687;152687;152687;255403	0;0;0;0;0;0
chr4	989901	990299	399	*	Intron (uc003gby.3/3425, intron 2 of 13)	4	981445	987224	5780	2	10861	uc003gcc.3	-2677	ENSG00000145217	SLC26A1	solute carrier family 26 member 1	uc003gbx.3;uc003gcb.3;uc003gcc.3;uc003gbw.4;uc010ibn.4;uc003gby.3;uc003gbz.3;uc003gca.3;uc003gce.3;uc003gcf.3;uc003gcg.3;uc010ibo.3;uc021xkf.1;uc010ibl.1;uc003gbp.1;uc003gbq.3;uc003gbr.3;uc003gbs.3;uc003gbt.3	10861;10861;10861;1609;1609;3425;3425;3425;53834;53834;53834;53834;84286;84286;84286;84286;84286;84286;84286	-2677;-2677;-2677;-22553;-22553;0;0;0;-14641;-15311;-15461;-15635;63639;63639;63639;63639;63639;63639;63639
chr4	1023301	1023649	349	*	Distal Intergenic	4	1005934	1020686	14753	1	53834	uc010ibo.3	17367	ENSG00000127418	FGFRL1	fibroblast growth factor receptor like 1	uc003gbx.3;uc003gcb.3;uc003gcc.3;uc003gci.3;uc003gcj.3;uc010ibp.3;uc010ibq.3;uc003gby.3;uc003gbz.3;uc003gca.3;uc003gce.3;uc003gcf.3;uc003gcg.3;uc010ibo.3	10861;10861;10861;285498;285498;285498;285498;3425;3425;3425;53834;53834;53834;53834	-36077;-36077;-36077;83703;83703;83703;83703;0;0;0;18361;17691;17541;17367
chr4	1040301	1040499	199	*	Distal Intergenic	4	1005934	1020686	14753	1	53834	uc010ibo.3	34367	ENSG00000127418	FGFRL1	fibroblast growth factor receptor like 1	uc003gci.3;uc003gcj.3;uc010ibp.3;uc010ibq.3;uc021xkh.1;uc003gby.3;uc003gbz.3;uc003gca.3;uc003gce.3;uc003gcf.3;uc003gcg.3;uc010ibo.3	285498;285498;285498;285498;285498;3425;3425;3425;53834;53834;53834;53834	66853;66853;66853;66853;66853;0;0;0;35361;34691;34541;34367
chr4	1714051	1714449	399	*	Promoter (<=1kb)	4	1694527	1714071	19545	2	7884	uc003gdl.1	0	ENSG00000163950	SLBP	stem-loop histone mRNA binding protein	uc010ibz.3;uc003gdo.3;uc003gdp.3;uc021xkk.1;uc010ibw.3;uc021xkl.1;uc003gdi.1;uc003gdk.1;uc011bvf.1;uc003gdl.1;uc010iby.3;uc003gdm.3;uc003gdn.3	10460;10460;10460;152877;152877;152877;7884;7884;7884;7884;92305;92305;92305	-8768;-8768;-8768;-28333;-28197;-28063;-21;-21;-21;0;5904;8635;8635
chr4	1773351	1773699	349	*	Distal Intergenic	4	1795039	1810599	15561	1	2261	uc003gdq.3	-21340	ENSG00000068078	FGFR3	fibroblast growth factor receptor 3	uc010ibz.3;uc003gdo.3;uc003gdp.3;uc003gdq.3;uc003gdr.3;uc003gds.3;uc003gdu.2;uc031sdd.1;uc003gdt.1;uc010icb.1;uc003gdv.3	10460;10460;10460;2261;2261;2261;2261;2261;2261;2261;3954	50134;50134;50134;-21340;-21340;-21340;-21340;-21861;-29395;-29395;84275
chr4	2467151	2467649	499	*	Distal Intergenic	4	2470795	2517586	46792	1	6047	uc003gfb.3	-3146	ENSG00000063978	RNF4	ring finger protein 4	uc021xkr.1;uc003gfa.1;uc003gex.2;uc011bvl.2;uc003gez.3;uc021xkq.1;uc003gfb.3;uc010icj.3;uc003gfc.3	402160;402160;57732;57732;57732;57732;6047;6047;6047	46450;38965;-46781;-46781;-46781;-46781;-3146;-3146;-3531
chr4	2537851	2538849	999	*	Distal Intergenic	4	2597828	2734302	136475	1	8603	uc010ick.3	-58979	ENSG00000125386	FAM193A	family with sequence similarity 193 member A	uc003gfb.3;uc010icj.3;uc003gfc.3	6047;6047;6047	67056;67056;66671
chr4	4341301	4341849	549	*	Distal Intergenic	4	4349869	4419654	69786	1	27065	uc031sde.1	-8020	ENSG00000168824	NSG1	neuronal vesicle trafficking associated 1	uc003ghu.3;uc003ghv.3;uc010icy.3;uc010icz.3;uc031sde.1;uc011bvz.2;uc011bwa.1;uc003ghz.3;uc003gia.3;uc011bvy.2;uc003ght.3	166793;166793;166793;166793;27065;27065;27065;27065;27065;55646;55646	49377;49377;49377;37263;-8020;-8020;-45735;-45735;-45735;-49553;-49405
chr4	6785251	6785399	149	*	Promoter (<=1kb)	4	6784459	6885899	101441	1	9778	uc003gjr.4	792	ENSG00000170871	KIAA0232	KIAA0232	uc003gjq.4;uc003gjr.4	9778;9778	0;0
chr4	6891301	6891499	199	*	Distal Intergenic	4	6911171	7034845	123675	1	57533	uc011bwg.2	-19672	ENSG00000132405	TBC1D14	TBC1 domain family member 14	uc011bwg.2;uc003gjs.4;uc003gjq.4;uc003gjr.4	57533;57533;9778;9778	0;0;0;0
chr4	6918351	6918699	349	*	Intron (uc011bwg.2/57533, intron 1 of 13)	4	6911495	7034845	123351	1	57533	uc003gjs.4	6856	ENSG00000132405	TBC1D14	TBC1 domain family member 14	uc011bwg.2;uc003gjs.4;uc003gjq.4;uc003gjr.4	57533;57533;9778;9778	0;0;0;0
chr4	9228351	9228499	149	*	Promoter (1-2kb)	4	9226622	9228214	1593	1	100287238	uc031sdj.1	1729	ENSG00000232399	USP17L13	ubiquitin specific peptidase 17 like family member 13	uc031sdg.1;uc031sdh.1;uc011bwp.2;uc031sdn.1;uc031sdi.1;uc031sdo.1;uc031sdj.1;uc031sdl.1;uc031sdm.1;uc031sdp.1;uc031sdk.1	100287144;100287178;100287178;100287178;100287205;100287205;100287238;100287327;100287404;100287441;100288520	15968;11220;-21857;-31351;6473;-36099;1729;0;-26605;0;-7612
chr4	9246751	9246999	249	*	Promoter (1-2kb)	4	9245605	9247197	1593	1	100287327	uc031sdl.1	1146	ENSG00000249104	USP17L17	ubiquitin specific peptidase 17 like family member 17	uc031sdg.1;uc031sdh.1;uc011bwp.2;uc031sdn.1;uc031sdi.1;uc031sdo.1;uc031sdj.1;uc031sdl.1;uc031sdm.1;uc031sdp.1;uc031sdk.1	100287144;100287178;100287178;100287178;100287205;100287205;100287238;100287327;100287404;100287441;100288520	34368;29620;-3357;-12851;24873;-17599;20129;0;-8105;0;10640
chr4	9257401	9257799	399	*	Distal Intergenic	4	9259850	9261442	1593	1	100287178	uc031sdn.1	-2051	ENSG00000233136	USP17L11	ubiquitin specific peptidase 17 like family member 11	uc031sdg.1;uc031sdh.1;uc011bwp.2;uc031sdn.1;uc031sdi.1;uc031sdo.1;uc031sdj.1;uc031sdl.1;uc031sdm.1;uc031sdp.1;uc031sdk.1	100287144;100287178;100287178;100287178;100287205;100287205;100287238;100287327;100287404;100287441;100288520	45018;40270;7045;-2051;35523;-6799;30779;0;2297;0;21290
chr4	9269951	9270399	449	*	Promoter (<=1kb)	4	9269345	9270937	1593	1	100287441	uc031sdp.1	606	ENSG00000250745	USP17L20	ubiquitin specific peptidase 17 like family member 20	uc011bwp.2;uc031sdn.1;uc031sdi.1;uc031sdo.1;uc031sdj.1;uc031sdl.1;uc031sdm.1;uc031sdp.1;uc031sdk.1	100287178;100287178;100287205;100287205;100287238;100287327;100287404;100287441;100288520	19595;10101;48073;5353;43329;0;14847;0;33840
chr4	9270851	9271149	299	*	Promoter (1-2kb)	4	9269345	9270937	1593	1	100287441	uc031sdp.1	1506	ENSG00000250745	USP17L20	ubiquitin specific peptidase 17 like family member 20	uc011bwp.2;uc031sdn.1;uc031sdi.1;uc031sdo.1;uc031sdj.1;uc031sdl.1;uc031sdm.1;uc031sdp.1;uc031sdk.1	100287178;100287178;100287205;100287205;100287238;100287327;100287404;100287441;100288520	20495;11001;48973;6253;44229;0;15747;0;34740
chr4	9271751	9271899	149	*	Distal Intergenic	4	9269345	9270937	1593	1	100287441	uc031sdp.1	2406	ENSG00000250745	USP17L20	ubiquitin specific peptidase 17 like family member 20	uc011bwp.2;uc031sdn.1;uc031sdi.1;uc031sdo.1;uc031sdj.1;uc031sdl.1;uc031sdm.1;uc031sdp.1;uc031sdk.1	100287178;100287178;100287205;100287205;100287238;100287327;100287404;100287441;100288520	21395;11901;49873;7153;45129;0;16647;0;35640
chr4	9353101	9353399	299	*	Promoter (1-2kb)	4	9355364	9356956	1593	1	728386	uc021xlr.1	-1965	ENSG00000227140	USP17L5	ubiquitin specific peptidase 17 like family member 5	uc011bws.2;uc031sdq.1;uc021xln.1;uc021xlo.1;uc031sdr.1;uc021xlr.1;uc021xll.1;uc021xlm.1;uc021xlp.1;uc021xlq.1	391622;391627;728369;728369;728369;728386;728393;728393;728400;728419	-16201;-6709;16717;11972;-11456;-1965;26210;21464;7227;2482
chr4	9366951	9367549	599	*	Distal Intergenic	4	9369600	9370796	1197	1	391622	uc011bws.2	-2051	ENSG00000205946	USP17L6P	ubiquitin specific peptidase 17 like family member 6, pseudogene	uc011bws.2;uc031sdq.1;uc021xln.1;uc021xlo.1;uc031sdr.1;uc021xlr.1;uc021xll.1;uc021xlm.1;uc021xlp.1;uc021xlq.1	391622;391627;728369;728369;728369;728386;728393;728393;728400;728419	-2051;6843;30567;25822;2096;11587;40060;35314;21077;16332
chr4	10182601	10183199	599	*	Distal Intergenic	4	10075963	10118573	42611	2	9948	uc021xlw.1	-64028	ENSG00000071127	WDR1	WD repeat domain 1	NA	NA	NA
chr4	33846851	33847199	349	*	Distal Intergenic	4	35949843	36075457	125615	2	116984	uc003gso.3	2228258	ENSG00000047365	ARAP2	ArfGAP with RhoGAP domain, ankyrin repeat and PH domain 2	NA	NA	NA
chr4	38665201	38665949	749	*	Promoter (<=1kb)	4	38665790	38692372	26583	1	51274	uc003gtg.2	0	ENSG00000109787	KLF3	KLF transcription factor 3	uc003gtg.2;uc003gth.4;uc003gte.1;uc003gtf.3	51274;51274;79667;79667	0;0;0;0
chr4	38668851	38669199	349	*	Intron (uc003gtg.2/51274, intron 1 of 3)	4	38628026	38666430	38405	2	79667	uc003gtf.3	-2421	NA	KLF3-AS1	KLF3 antisense RNA 1	uc003gtg.2;uc003gth.4;uc003gte.1;uc003gtf.3	51274;51274;79667;79667	0;0;0;0
chr4	40292401	40292599	199	*	Distal Intergenic	4	40337346	40357234	19889	1	55584	uc003gva.2	-44747	ENSG00000174343	CHRNA9	cholinergic receptor nicotinic alpha 9 subunit	uc003guz.2;uc003gva.2	399;55584	93874;-44747
chr4	40297151	40297399	249	*	Distal Intergenic	4	40337346	40357234	19889	1	55584	uc003gva.2	-39947	ENSG00000174343	CHRNA9	cholinergic receptor nicotinic alpha 9 subunit	uc003gva.2	55584	-39947
chr4	48245351	48245899	549	*	Intron (uc003gxz.3/7006, intron 1 of 17)	4	48137800	48271814	134015	2	7006	uc003gxz.3	25915	ENSG00000135605	TEC	tec protein tyrosine kinase	uc003gxz.3	7006	0
chr4	48343051	48343399	349	*	Promoter (<=1kb)	4	48343613	48428215	84603	1	57606	uc003gya.4	-214	ENSG00000109171	SLAIN2	SLAIN motif family member 2	uc003gya.4;uc003gyb.1	57606;57606	-214;-41129
chr4	48683201	48683399	199	*	Intron (uc003gyh.1/285527, intron 3 of 63)	4	48619621	48655826	36206	2	285527	uc003gyl.1	-27375	ENSG00000075539	FRYL	FRY like transcription coactivator	uc003gyh.1;uc003gyk.3;uc003gyl.1;uc003gym.1;uc003gyn.3	285527;285527;285527;285527;285527	0;0;-27375;0;0
chr4	49093201	49103249	10049	*	Distal Intergenic	4	48988659	49064095	75437	1	80157	uc011bzl.2	104542	ENSG00000109182	CWH43	cell wall biogenesis 43 C-terminal homolog	uc003gyv.3;uc011bzl.2	80157;80157	104936;104542
chr4	49124151	49127049	2899	*	Distal Intergenic	4	48988659	49064095	75437	1	80157	uc011bzl.2	135492	ENSG00000109182	CWH43	cell wall biogenesis 43 C-terminal homolog	NA	NA	NA
chr4	49131451	49133099	1649	*	Distal Intergenic	4	48988659	49064095	75437	1	80157	uc011bzl.2	142792	ENSG00000109182	CWH43	cell wall biogenesis 43 C-terminal homolog	NA	NA	NA
chr4	49137501	49140849	3349	*	Distal Intergenic	4	48988659	49064095	75437	1	80157	uc011bzl.2	148842	ENSG00000109182	CWH43	cell wall biogenesis 43 C-terminal homolog	NA	NA	NA
chr4	49140951	49142199	1249	*	Distal Intergenic	4	48988659	49064095	75437	1	80157	uc011bzl.2	152292	ENSG00000109182	CWH43	cell wall biogenesis 43 C-terminal homolog	NA	NA	NA
chr4	49144751	49145249	499	*	Distal Intergenic	4	48988659	49064095	75437	1	80157	uc011bzl.2	156092	ENSG00000109182	CWH43	cell wall biogenesis 43 C-terminal homolog	NA	NA	NA
chr4	49148951	49153499	4549	*	Distal Intergenic	4	48988659	49064095	75437	1	80157	uc011bzl.2	160292	ENSG00000109182	CWH43	cell wall biogenesis 43 C-terminal homolog	NA	NA	NA
chr4	49153801	49158699	4899	*	Distal Intergenic	4	48988659	49064095	75437	1	80157	uc011bzl.2	165142	ENSG00000109182	CWH43	cell wall biogenesis 43 C-terminal homolog	NA	NA	NA
chr4	49218701	49219149	449	*	Distal Intergenic	4	48988659	49064095	75437	1	80157	uc011bzl.2	230042	ENSG00000109182	CWH43	cell wall biogenesis 43 C-terminal homolog	NA	NA	NA
chr4	49248051	49248499	449	*	Distal Intergenic	4	48988659	49064095	75437	1	80157	uc011bzl.2	259392	ENSG00000109182	CWH43	cell wall biogenesis 43 C-terminal homolog	NA	NA	NA
chr4	49256201	49256699	499	*	Distal Intergenic	4	48988659	49064095	75437	1	80157	uc011bzl.2	267542	ENSG00000109182	CWH43	cell wall biogenesis 43 C-terminal homolog	NA	NA	NA
chr4	49265651	49266999	1349	*	Distal Intergenic	4	48988659	49064095	75437	1	80157	uc011bzl.2	276992	ENSG00000109182	CWH43	cell wall biogenesis 43 C-terminal homolog	NA	NA	NA
chr4	49268601	49268799	199	*	Distal Intergenic	4	48988659	49064095	75437	1	80157	uc011bzl.2	279942	ENSG00000109182	CWH43	cell wall biogenesis 43 C-terminal homolog	NA	NA	NA
chr4	49271751	49272199	449	*	Distal Intergenic	4	48988659	49064095	75437	1	80157	uc011bzl.2	283092	ENSG00000109182	CWH43	cell wall biogenesis 43 C-terminal homolog	NA	NA	NA
chr4	49272451	49273149	699	*	Distal Intergenic	4	48988659	49064095	75437	1	80157	uc011bzl.2	283792	ENSG00000109182	CWH43	cell wall biogenesis 43 C-terminal homolog	NA	NA	NA
chr4	49288101	49288699	599	*	Distal Intergenic	4	48988659	49064095	75437	1	80157	uc011bzl.2	299442	ENSG00000109182	CWH43	cell wall biogenesis 43 C-terminal homolog	NA	NA	NA
chr4	49289951	49290299	349	*	Distal Intergenic	4	48988659	49064095	75437	1	80157	uc011bzl.2	301292	ENSG00000109182	CWH43	cell wall biogenesis 43 C-terminal homolog	NA	NA	NA
chr4	49293051	49293249	199	*	Distal Intergenic	4	48988659	49064095	75437	1	80157	uc011bzl.2	304392	ENSG00000109182	CWH43	cell wall biogenesis 43 C-terminal homolog	NA	NA	NA
chr4	49319651	49319749	99	*	Distal Intergenic	4	48988659	49064095	75437	1	80157	uc011bzl.2	330992	ENSG00000109182	CWH43	cell wall biogenesis 43 C-terminal homolog	NA	NA	NA
chr4	49321751	49321849	99	*	Distal Intergenic	4	48988659	49064095	75437	1	80157	uc011bzl.2	333092	ENSG00000109182	CWH43	cell wall biogenesis 43 C-terminal homolog	NA	NA	NA
chr4	49530351	49530899	549	*	Distal Intergenic	4	48988659	49064095	75437	1	80157	uc011bzl.2	541692	ENSG00000109182	CWH43	cell wall biogenesis 43 C-terminal homolog	NA	NA	NA
chr4	49539051	49539299	249	*	Distal Intergenic	4	48988659	49064095	75437	1	80157	uc011bzl.2	550392	ENSG00000109182	CWH43	cell wall biogenesis 43 C-terminal homolog	NA	NA	NA
chr4	49638051	49645799	7749	*	Distal Intergenic	4	48988659	49064095	75437	1	80157	uc011bzl.2	649392	ENSG00000109182	CWH43	cell wall biogenesis 43 C-terminal homolog	NA	NA	NA
chr4	49651601	49660099	8499	*	Distal Intergenic	4	48988659	49064095	75437	1	80157	uc011bzl.2	662942	ENSG00000109182	CWH43	cell wall biogenesis 43 C-terminal homolog	NA	NA	NA
chr4	52661851	52661999	149	*	Distal Intergenic	4	52709276	52783003	73728	1	23142	uc003gze.3	-47277	ENSG00000109184	DCUN1D4	defective in cullin neddylation 1 domain containing 4	uc003gze.3;uc003gzf.3;uc003gzg.3;uc003gzh.3;uc011bzn.2;uc011bzo.2	23142;23142;23142;23142;23142;23142	-47277;-47277;-47277;-47277;-47277;-47746
chr4	52670101	52670349	249	*	Distal Intergenic	4	52709276	52783003	73728	1	23142	uc003gze.3	-38927	ENSG00000109184	DCUN1D4	defective in cullin neddylation 1 domain containing 4	uc003gze.3;uc003gzf.3;uc003gzg.3;uc003gzh.3;uc011bzn.2;uc011bzo.2	23142;23142;23142;23142;23142;23142	-38927;-38927;-38927;-38927;-38927;-39396
chr4	56253051	56253199	149	*	Promoter (1-2kb)	4	56232768	56251747	18980	2	100506462	uc003haw.2	-1304	ENSG00000249700	SRD5A3-AS1	SRD5A3 antisense RNA 1	uc003hav.1;uc003haw.2;uc003hax.3;uc011bzy.2;uc003hau.3;uc010igu.2;uc003haz.2;uc003hba.2	100506462;100506462;55858;55858;79644;9575;9575;9575	-3488;-1304;0;0;40663;62464;158900;159877
chr4	56262101	56262849	749	*	Promoter (<=1kb)	4	56262080	56292342	30263	1	55858	uc011bzy.2	21	ENSG00000134851	TMEM165	transmembrane protein 165	uc003hav.1;uc003haw.2;uc003hax.3;uc011bzy.2;uc003hau.3;uc010igu.2;uc003haz.2;uc003hba.2	100506462;100506462;55858;55858;79644;9575;9575;9575	-12538;-10354;0;0;49713;52814;149250;150227
chr4	66158701	66158849	149	*	Distal Intergenic	4	65779999	65870218	90220	2	401134	uc021xos.1	-288483	ENSG00000250125	LINC02232	long intergenic non-protein coding RNA 2232	uc003hcx.3;uc003hcy.3;uc003hcz.3;uc011cah.2;uc011cai.2;uc003hda.2	2044;2044;2044;2044;2044;2044	376357;376804;376804;376804;376804;376804
chr4	68389051	68389349	299	*	Intron (uc010ihj.1/1060, intron 1 of 14)	4	68337989	68396632	58644	2	1060	uc010ihj.1	7283	ENSG00000145241	CENPC	centromere protein C	uc010ihj.1;uc003hdd.1;uc010ihk.1;uc010ihl.3;uc010ihm.1;uc003hde.4;uc003hdf.3	1060;1060;1060;1060;1060;26228;26228	0;0;0;-28121;0;-35097;-35097
chr4	71705751	71705999	249	*	Promoter (<=1kb)	4	71681499	71705627	24129	2	2926	uc010iia.1	-124	ENSG00000132463	GRSF1	G-rich RNA sequence binding factor 1	uc003hfq.3;uc011cax.2;uc003hfr.3;uc011cay.2;uc011caz.1;uc003hfs.2;uc010iia.1	22902;22902;22902;22902;2926;2926;2926	118055;118055;118055;105563;-718;-531;-124
chr4	71768951	71769299	349	*	Promoter (<=1kb)	4	71768057	71853891	85835	1	92597	uc011cba.2	894	ENSG00000173542	MOB1B	MOB kinase activator 1B	uc003hfv.2;uc003hfw.3;uc011cba.2	92597;92597;92597	0;0;0
chr4	77870751	77870949	199	*	Promoter (<=1kb)	4	77870895	77952123	81229	1	55752	uc010ijh.1	0	ENSG00000138758	SEPTIN11	septin 11	uc010ijh.1;uc003hkj.3;uc011cca.2	55752;55752;55752	0;0;0
chr4	77997201	77997549	349	*	Promoter (<=1kb)	4	77969177	77997125	27949	2	10983	uc011ccb.2	-76	ENSG00000118816	CCNI	cyclin I	uc003hkm.3;uc011ccb.2;uc010ijh.1;uc003hkj.3;uc011cca.2	10983;10983;55752;55752;55752	-76;-76;0;0;0
chr4	78739501	78740149	649	*	Promoter (<=1kb)	4	78634541	78740522	105982	2	246175	uc011ccd.2	373	ENSG00000138767	CNOT6L	CCR4-NOT transcription complex subunit 6 like	uc011ccd.2;uc003hks.3;uc011cce.1;uc003hku.2	246175;246175;246175;65008	0;0;0;-43656
chr4	79613051	79613549	499	*	Distal Intergenic	4	79567148	79605655	38508	1	100505702	uc021xpk.1	45903	NA	LINC01094	long intergenic non-protein coding RNA 1094	uc003hlf.3;uc003hlg.3;uc003hlh.3;uc003hli.3;uc021xpj.1;uc021xpk.1	100505702;100505702;100505702;100505702;100505702;100505702	45903;45903;45903;45903;45903;45903
chr4	82393101	82393449	349	*	Promoter (<=1kb)	4	82372047	82393061	21015	2	153020	uc003hmk.3	-40	ENSG00000138670	RASGEF1B	RasGEF domain family member 1B	uc003hmi.1;uc003hmj.1;uc010ijq.1;uc003hmk.3	153020;153020;153020;153020	-40;-40;-40;-40
chr4	83294951	83295799	849	*	Promoter (<=1kb)	4	83274467	83295149	20683	2	3184	uc003hmm.1	0	ENSG00000138668	HNRNPD	heterogeneous nuclear ribonucleoprotein D	uc003hml.1;uc003hmm.1;uc003hmn.1;uc003hmo.1;uc003hmp.1;uc010ijr.1;uc011cci.1;uc003hmq.3;uc003hmr.3;uc003hmt.3	3184;3184;3184;3184;3184;3184;3184;9987;9987;9987	-2214;0;0;0;0;0;0;55579;55579;55579
chr4	83955951	83956149	199	*	Promoter (<=1kb)	4	83956239	83996971	40733	1	51138	uc003hoa.3	-90	ENSG00000138663	COPS4	COP9 signalosome subunit 4	uc003hnx.3;uc003hny.3;uc003hnz.3;uc010ijt.2;uc010iju.2;uc010ijv.2;uc003hoa.3;uc010ijx.3	132660;132660;132660;132660;132660;132660;51138;51138	-23969;-23969;-23969;-23969;-23969;-21911;-90;-90
chr4	84678401	84678649	249	*	Distal Intergenic	4	84457470	84527027	69558	1	84803	uc003hox.4	220931	ENSG00000138678	GPAT3	glycerol-3-phosphate acyltransferase 3	NA	NA	NA
chr4	87928801	87928949	149	*	Promoter (<=1kb)	4	87928153	88062206	134054	1	4299	uc011cda.2	648	ENSG00000172493	AFF1	ALF transcription elongation factor 1	uc011ccx.2;uc003hqh.2;uc011ccy.2;uc011ccz.2;uc003hqj.4;uc003hqk.4;uc011cda.2	4299;4299;4299;4299;4299;4299;4299	0;0;0;0;0;0;0
chr4	90757301	90757549	249	*	Promoter (<=1kb)	4	90645250	90757364	112115	2	6622	uc010ikt.4	0	ENSG00000145335	SNCA	synuclein alpha	uc021xqd.1;uc010ikt.4;uc031sga.1;uc031sgb.1;uc003hso.3;uc003hsq.3;uc031sgc.1;uc031sgd.1;uc003hsp.3;uc031sge.1;uc031sgf.1;uc031sgg.1;uc003hsr.3;uc031sgh.1;uc031sgi.1;uc031sgj.1;uc021xqc.1	644248;6622;6622;6622;6622;6622;6622;6622;6622;6622;6622;6622;6622;6622;6622;6622;6622	-3;0;0;0;0;0;0;0;0;0;0;0;0;0;0;0;0
chr4	90810451	90810749	299	*	Distal Intergenic	4	90816003	90875780	59778	1	22915	uc010iku.3	-5254	ENSG00000138722	MMRN1	multimerin 1	uc010iku.3;uc003hst.3;uc011cds.2;uc021xqd.1	22915;22915;22915;644248	-5254;-5303;-12448;52899
chr4	99917101	99917499	399	*	Promoter (<=1kb)	4	99916788	99983960	67173	1	23173	uc003huf.4	313	ENSG00000164024	METAP1	methionyl aminopeptidase 1	uc021xqh.1;uc003huf.4;uc003hug.3;uc010ild.3	100500867;23173;23173;23173	-1039;0;-26422;-48831
chr4	103747101	103747399	299	*	Promoter (<=1kb)	4	103717133	103748340	31208	2	7323	uc003hwi.3	941	ENSG00000109332	UBE2D3	ubiquitin conjugating enzyme E2 D3	uc003hwt.4;uc003hwi.3;uc003hwk.3;uc003hwl.3;uc003hwo.3;uc011cet.2;uc011ceu.2;uc003hwp.3;uc003hwq.3;uc003hwr.3	493856;7323;7323;7323;7323;7323;7323;7323;7323;7323	-42736;0;0;0;0;0;0;0;0;0
chr4	103748601	103748949	349	*	Promoter (<=1kb)	4	103717133	103748708	31576	2	7323	uc003hwk.3	0	ENSG00000109332	UBE2D3	ubiquitin conjugating enzyme E2 D3	uc003hwt.4;uc003hwi.3;uc003hwk.3;uc003hwl.3;uc003hwo.3;uc011cet.2;uc011ceu.2;uc003hwp.3;uc003hwq.3;uc003hwr.3	493856;7323;7323;7323;7323;7323;7323;7323;7323;7323	-41186;0;0;0;0;0;0;0;0;0
chr4	103940801	103940899	99	*	Promoter (<=1kb)	4	103806205	103940896	134692	2	150159	uc003hwu.3	0	ENSG00000164037	SLC9B1	solute carrier family 9 member B1	uc010iln.2;uc003hwx.4;uc003hwy.3;uc011cew.2;uc011cex.1;uc011cey.2;uc003hwu.3;uc003hwv.4;uc010ilm.3;uc003hww.3;uc011cev.2	133308;133308;133308;133308;133308;133308;150159;150159;150159;150159;150159	38229;0;0;0;0;47850;0;0;0;0;0
chr4	103997351	103997749	399	*	Promoter (<=1kb)	4	103941387	103998170	56784	2	133308	uc003hwx.4	421	ENSG00000164038	SLC9B2	solute carrier family 9 member B2	uc003hxb.1;uc003hxc.1;uc010iln.2;uc003hwx.4;uc003hwy.3;uc011cew.2;uc011cex.1;uc011cey.2;uc003hwz.3	1062;1062;133308;133308;133308;133308;133308;133308;56898	0;0;-18223;0;0;0;0;-8602;23275
chr4	104119451	104119849	399	*	Promoter (<=1kb)	4	104026963	104119566	92604	2	1062	uc003hxb.1	0	ENSG00000138778	CENPE	centromere protein E	uc003hxb.1;uc003hxc.1	1062;1062	0;0
chr4	125633351	125634199	849	*	Promoter (<=1kb)	4	125585204	125633887	48684	2	57182	uc010inw.3	0	ENSG00000151458	ANKRD50	ankyrin repeat domain containing 50	uc010inw.3;uc011cgo.2	57182;57182	0;0
chr4	129268751	129269099	349	*	Distal Intergenic	4	129190392	129209984	19593	2	10424	uc003igg.3	-58767	ENSG00000164040	PGRMC2	progesterone receptor membrane component 2	NA	NA	NA
chr4	129607351	129607549	199	*	Distal Intergenic	4	129730779	129785787	55009	1	79960	uc003igj.3	-123230	ENSG00000077684	JADE1	jade family PHD finger 1	NA	NA	NA
chr4	140098401	140098699	299	*	Distal Intergenic	4	139978871	140060651	81781	2	1998	uc003ihp.1	-37750	ENSG00000109381	ELF2	E74 like ETS transcription factor 2	uc003ihp.1	1998	-37750
chr4	140098801	140099349	549	*	Distal Intergenic	4	139978871	140060651	81781	2	1998	uc003ihp.1	-38150	ENSG00000109381	ELF2	E74 like ETS transcription factor 2	uc003ihp.1	1998	-38150
chr4	144106251	144106549	299	*	Promoter (<=1kb)	4	144106070	144143141	37072	1	84640	uc003ijc.3	181	ENSG00000170185	USP38	ubiquitin specific peptidase 38	uc003ija.4;uc003ijb.3;uc003ijc.3	84640;84640;84640	0;0;0
chr4	151242351	151242549	199	*	Exon (uc010ipi.3/987, exon 4 of 11)	4	151185811	151232521	46711	2	987	uc003ilr.4	-9830	ENSG00000198589	LRBA	LPS responsive beige-like anchor protein	uc003ilr.4;uc010ipi.3;uc003ils.4;uc003ilt.4;uc003ilu.4;uc010ipj.3	987;987;987;987;987;987	-9830;0;0;0;0;0
chr4	152593101	152593349	249	*	Intron (uc003imk.3/5188, intron 1 of 1)	4	152591809	152597040	5232	2	5188	uc003imk.3	3691	ENSG00000059691	GATB	glutamyl-tRNA amidotransferase subunit B	uc003imk.3;uc003iml.3;uc003imm.4;uc003imj.2	5188;5188;5188;729830	0;0;88826;262703
chr4	159841601	159841999	399	*	Intron (uc003iqf.1/152940, intron 3 of 4)	4	159814684	159956333	141650	2	152940	uc003iqf.1	114334	ENSG00000164123	SPMIP2	sperm microtubule inner protein 2	uc003iqf.1;uc010iqt.1;uc003iqe.4	152940;152940;57600	0;0;151419
chr4	160024951	160025299	349	*	Promoter (<=1kb)	4	159814684	160024105	209422	2	152940	uc010iqt.1	-846	ENSG00000164123	SPMIP2	sperm microtubule inner protein 2	uc021xtt.1;uc021xtu.1;uc010iqt.1	100500881;100616303;152940	24747;-24658;0
chr4	164116301	164116749	449	*	Distal Intergenic	4	164049823	164088073	38251	2	92345	uc003iqj.3	-28228	ENSG00000145414	NAF1	nuclear assembly factor 1 ribonucleoprotein	uc010iqw.1;uc003iqj.3	92345;92345	-28228;-28228
chr4	164415651	164415899	249	*	Promoter (<=1kb)	4	164415673	164441691	26019	1	55319	uc003iqq.4	0	ENSG00000198498	TMA16	translation machinery associated 16 homolog	uc003iqr.2;uc003iqs.2;uc003iqq.4;uc003iqp.4	55016;55016;55319;84076	118877;888508;0;-20604
chr4	169178901	169179299	399	*	Intron (uc003irp.3/55601, intron 25 of 37)	4	169137445	169146827	9383	2	55601	uc003iro.3	-32074	ENSG00000137628	DDX60	DExD/H-box helicase 60	uc003irp.3;uc003iro.3	55601;55601	0;-32074
chr4	173920301	173920499	199	*	Intron (uc003isv.3/442117, intron 10 of 12)	4	174089904	174245118	155215	1	51809	uc003isz.4	-169405	ENSG00000109586	GALNT7	polypeptide N-acetylgalactosaminyltransferase 7	uc003isv.3	442117	0
chr4	174203151	174203349	199	*	Intron (uc003isz.4/51809, intron 2 of 11)	4	174213259	174245118	31860	1	51809	uc011ckb.2	-9910	ENSG00000109586	GALNT7	polypeptide N-acetylgalactosaminyltransferase 7	uc011ckc.1;uc003ita.3;uc003itb.2;uc003isz.4;uc011ckb.2	3148;3148;3148;51809;51809	51571;52160;52246;0;-9910
chr4	184316601	184316999	399	*	Distal Intergenic	4	184365789	184369049	3261	1	55602	uc003ivp.1	-48790	ENSG00000168564	CDKN2AIP	CDKN2A interacting protein	uc003ivp.1;uc003ivq.1	55602;55602	0;0
chr4	184365451	184365699	249	*	Promoter (<=1kb)	4	184365789	184369049	3261	1	55602	uc003ivp.1	-90	ENSG00000168564	CDKN2AIP	CDKN2A interacting protein	uc003ivp.1;uc003ivq.1	55602;55602	0;0
chr4	184365851	184366599	749	*	Promoter (<=1kb)	4	184365789	184369049	3261	1	55602	uc003ivq.1	62	ENSG00000168564	CDKN2AIP	CDKN2A interacting protein	uc003ivr.3;uc003ivp.1;uc003ivq.1	389247;55602;55602	59069;0;0
chr4	185655351	185655649	299	*	Promoter (<=1kb)	4	185618801	185655286	36486	2	79682	uc003iwr.1	-65	ENSG00000151725	CENPU	centromere protein U	uc003iwj.2;uc003iwk.2;uc003iwm.2;uc003iwn.2;uc003iws.1;uc003iww.2;uc011ckm.1;uc003iwt.1;uc003iwu.1;uc011ckn.1;uc010ise.1;uc003iwp.3;uc003iwq.3;uc003iwr.1	201973;201973;201973;201973;2180;2180;2180;2180;2180;2180;2180;79682;79682;79682	84584;84584;84584;84584;32261;71293;73956;77764;91566;91566;39380;-3229;-65;-65
chr4	186347151	186347599	449	*	Promoter (<=1kb)	4	186320694	186347139	26446	2	55325	uc003ixq.2	-12	ENSG00000109775	UFSP2	UFM1 specific peptidase 2	uc003ixu.4;uc003ixv.4;uc011ckt.1;uc003ixm.3;uc011cks.2;uc003ixs.2;uc003ixt.2;uc003ixo.2;uc003ixq.2;uc003ixj.2	256309;256309;256309;353322;353322;441054;441054;55325;55325;55805	0;0;0;29311;29311;-2946;-2946;-12;-12;-46999
chr4	186392301	186392549	249	*	Promoter (<=1kb)	4	186366338	186392913	26576	2	256309	uc003ixu.4	364	ENSG00000168491	CCDC110	coiled-coil domain containing 110	uc003ixu.4;uc003ixv.4;uc011ckt.1;uc003ixw.4;uc003ixx.4;uc010isi.3;uc031sia.1;uc031sib.1;uc003ixy.3;uc003ixz.2;uc003ixs.2;uc003ixt.2;uc003ixo.2;uc003ixq.2	256309;256309;256309;27295;27295;27295;27295;27295;27295;27295;441054;441054;55325;55325	0;0;0;64163;64163;64163;64163;64163;64163;64163;41756;41756;-45162;-45162
chr4	190197951	190198099	149	*	Distal Intergenic	4	190861974	190884359	22386	1	2483	uc003izs.3	-663875	ENSG00000109536	FRG1	FSHD region gene 1	NA	NA	NA
chr4	190198601	190198999	399	*	Distal Intergenic	4	190861974	190884359	22386	1	2483	uc003izs.3	-662975	ENSG00000109536	FRG1	FSHD region gene 1	NA	NA	NA
chr4	190540051	190540549	499	*	Distal Intergenic	4	190861974	190884359	22386	1	2483	uc003izs.3	-321425	ENSG00000109536	FRG1	FSHD region gene 1	NA	NA	NA
chr4	190541601	190541849	249	*	Distal Intergenic	4	190861974	190884359	22386	1	2483	uc003izs.3	-320125	ENSG00000109536	FRG1	FSHD region gene 1	NA	NA	NA
chr4	190545451	190545599	149	*	Distal Intergenic	4	190861974	190884359	22386	1	2483	uc003izs.3	-316375	ENSG00000109536	FRG1	FSHD region gene 1	NA	NA	NA
chr4	190552101	190552399	299	*	Distal Intergenic	4	190861974	190884359	22386	1	2483	uc003izs.3	-309575	ENSG00000109536	FRG1	FSHD region gene 1	NA	NA	NA
chr4	190552701	190552849	149	*	Distal Intergenic	4	190861974	190884359	22386	1	2483	uc003izs.3	-309125	ENSG00000109536	FRG1	FSHD region gene 1	NA	NA	NA
chr4	190554801	190555199	399	*	Distal Intergenic	4	190861974	190884359	22386	1	2483	uc003izs.3	-306775	ENSG00000109536	FRG1	FSHD region gene 1	NA	NA	NA
chr4	190557151	190557599	449	*	Distal Intergenic	4	190861974	190884359	22386	1	2483	uc003izs.3	-304375	ENSG00000109536	FRG1	FSHD region gene 1	NA	NA	NA
chr4	190560601	190560949	349	*	Distal Intergenic	4	190861974	190884359	22386	1	2483	uc003izs.3	-301025	ENSG00000109536	FRG1	FSHD region gene 1	NA	NA	NA
chr4	190561051	190561199	149	*	Distal Intergenic	4	190861974	190884359	22386	1	2483	uc003izs.3	-300775	ENSG00000109536	FRG1	FSHD region gene 1	NA	NA	NA
chr4	190566051	190566399	349	*	Distal Intergenic	4	190861974	190884359	22386	1	2483	uc003izs.3	-295575	ENSG00000109536	FRG1	FSHD region gene 1	NA	NA	NA
chr4	190576951	190577249	299	*	Distal Intergenic	4	190861974	190884359	22386	1	2483	uc003izs.3	-284725	ENSG00000109536	FRG1	FSHD region gene 1	NA	NA	NA
chr4	190579551	190580099	549	*	Distal Intergenic	4	190861974	190884359	22386	1	2483	uc003izs.3	-281875	ENSG00000109536	FRG1	FSHD region gene 1	NA	NA	NA
chr4	190580501	190580999	499	*	Distal Intergenic	4	190861974	190884359	22386	1	2483	uc003izs.3	-280975	ENSG00000109536	FRG1	FSHD region gene 1	NA	NA	NA
chr4	190587351	190587899	549	*	Distal Intergenic	4	190861974	190884359	22386	1	2483	uc003izs.3	-274075	ENSG00000109536	FRG1	FSHD region gene 1	NA	NA	NA
chr4	190590051	190590349	299	*	Distal Intergenic	4	190861974	190884359	22386	1	2483	uc003izs.3	-271625	ENSG00000109536	FRG1	FSHD region gene 1	NA	NA	NA
chr4	190593451	190593749	299	*	Distal Intergenic	4	190861974	190884359	22386	1	2483	uc003izs.3	-268225	ENSG00000109536	FRG1	FSHD region gene 1	NA	NA	NA
chr4	190596251	190596499	249	*	Distal Intergenic	4	190861974	190884359	22386	1	2483	uc003izs.3	-265475	ENSG00000109536	FRG1	FSHD region gene 1	NA	NA	NA
chr4	190604251	190604799	549	*	Distal Intergenic	4	190861974	190884359	22386	1	2483	uc003izs.3	-257175	ENSG00000109536	FRG1	FSHD region gene 1	NA	NA	NA
chr4	190610951	190611099	149	*	Distal Intergenic	4	190861974	190884359	22386	1	2483	uc003izs.3	-250875	ENSG00000109536	FRG1	FSHD region gene 1	NA	NA	NA
chr4	190612401	190612899	499	*	Distal Intergenic	4	190861974	190884359	22386	1	2483	uc003izs.3	-249075	ENSG00000109536	FRG1	FSHD region gene 1	NA	NA	NA
chr4	190614751	190615049	299	*	Distal Intergenic	4	190861974	190884359	22386	1	2483	uc003izs.3	-246925	ENSG00000109536	FRG1	FSHD region gene 1	NA	NA	NA
chr4	190626601	190627149	549	*	Distal Intergenic	4	190861974	190884359	22386	1	2483	uc003izs.3	-234825	ENSG00000109536	FRG1	FSHD region gene 1	NA	NA	NA
chr4	190641101	190641449	349	*	Distal Intergenic	4	190861974	190884359	22386	1	2483	uc003izs.3	-220525	ENSG00000109536	FRG1	FSHD region gene 1	NA	NA	NA
chr4	190645701	190645999	299	*	Distal Intergenic	4	190861974	190884359	22386	1	2483	uc003izs.3	-215975	ENSG00000109536	FRG1	FSHD region gene 1	NA	NA	NA
chr4	190651101	190651299	199	*	Distal Intergenic	4	190861974	190884359	22386	1	2483	uc003izs.3	-210675	ENSG00000109536	FRG1	FSHD region gene 1	NA	NA	NA
chr4	190659801	190660699	899	*	Distal Intergenic	4	190861974	190884359	22386	1	2483	uc003izs.3	-201275	ENSG00000109536	FRG1	FSHD region gene 1	NA	NA	NA
chr4	190661651	190661949	299	*	Distal Intergenic	4	190861974	190884359	22386	1	2483	uc003izs.3	-200025	ENSG00000109536	FRG1	FSHD region gene 1	NA	NA	NA
chr4	190669201	190669649	449	*	Distal Intergenic	4	190861974	190884359	22386	1	2483	uc003izs.3	-192325	ENSG00000109536	FRG1	FSHD region gene 1	NA	NA	NA
chr4	190671251	190671549	299	*	Distal Intergenic	4	190861974	190884359	22386	1	2483	uc003izs.3	-190425	ENSG00000109536	FRG1	FSHD region gene 1	NA	NA	NA
chr4	190683851	190683899	49	*	Distal Intergenic	4	190861974	190884359	22386	1	2483	uc003izs.3	-178075	ENSG00000109536	FRG1	FSHD region gene 1	NA	NA	NA
chr4	190768051	190768299	249	*	Distal Intergenic	4	190861974	190884359	22386	1	2483	uc003izs.3	-93675	ENSG00000109536	FRG1	FSHD region gene 1	NA	NA	NA
chr4	190802401	190802699	299	*	Intron (uc003izq.4/uc003izq.4, intron 2 of 2)	4	190861974	190884359	22386	1	2483	uc003izs.3	-59275	ENSG00000109536	FRG1	FSHD region gene 1	NA	NA	NA
chr4	190846601	190847049	449	*	Intron (uc003izq.4/uc003izq.4, intron 2 of 2)	4	190861974	190884359	22386	1	2483	uc003izs.3	-14925	ENSG00000109536	FRG1	FSHD region gene 1	uc003izs.3	2483	0
chr4	190879651	190879849	199	*	Intron (uc003izs.3/2483, intron 6 of 8)	4	190861974	190884359	22386	1	2483	uc003izs.3	17677	ENSG00000109536	FRG1	FSHD region gene 1	uc003izs.3	2483	0
chr4	190913951	190914199	249	*	Distal Intergenic	4	190945523	190948412	2890	2	100288255	uc003izv.3	34213	NA	NA	NA	uc003izv.3;uc011clh.2;uc003izs.3	100288255;100288255;2483	34213;34213;0
chr4	191031701	191032149	449	*	Distal Intergenic	4	191012063	191013442	1380	1	26583	uc031sih.1	19638	ENSG00000281720	DUX4L8	double homeobox 4 like 8 (pseudogene)	uc031sig.1;uc031sid.1;uc031sif.1;uc031sih.1;uc021xvr.2;uc031sie.1;uc011clk.2	22947;26583;26583;26583;441056;653544;653545	32825;42708;36118;19638;29611;39497;26317
chr4	191034151	191034499	349	*	Distal Intergenic	4	191012063	191013442	1380	1	26583	uc031sih.1	22088	ENSG00000281720	DUX4L8	double homeobox 4 like 8 (pseudogene)	uc031sig.1;uc031sid.1;uc031sif.1;uc031sih.1;uc021xvr.2;uc031sie.1;uc011clk.2	22947;26583;26583;26583;441056;653544;653545	35275;45158;38568;22088;32061;41947;28767
chr5	373951	374149	199	*	Intron (uc003jav.3/57491, intron 3 of 11)	5	421035	438405	17371	1	57491	uc003jax.3	-46886	ENSG00000063438	AHRR	aryl hydrocarbon receptor repressor	uc003jav.3;uc003jaw.3;uc010isy.3;uc010isz.3;uc003jax.3;uc003jay.3	57491;57491;57491;57491;57491;57491	0;0;0;0;-46886;-46886
chr5	964001	964349	349	*	Distal Intergenic	5	988425	997455	9031	2	100506688	uc021xvx.1	33106	ENSG00000215246	LINC02982	long intergenic non-protein coding RNA 2982	uc021xvx.1;uc003jbt.2;uc010itf.2;uc003jbr.3	100506688;85409;85409;9319	33106;-44728;-44728;71032
chr5	1105651	1106349	699	*	Intron (uc003jbu.3/10723, intron 1 of 23)	5	1050489	1112172	61684	2	10723	uc003jbu.3	5823	ENSG00000113504	SLC12A7	solute carrier family 12 member 7	uc021xvy.1;uc003jbu.3	100616479;10723	-42562;0
chr5	1200151	1200399	249	*	Promoter (1-2kb)	5	1201710	1225230	23521	1	340024	uc003jbw.4	-1311	ENSG00000174358	SLC6A19	solute carrier family 6 member 19	uc003jbw.4;uc003jby.2	340024;348932	-1311;-25071
chr5	1201401	1201649	249	*	Promoter (<=1kb)	5	1201710	1225230	23521	1	340024	uc003jbw.4	-61	ENSG00000174358	SLC6A19	solute carrier family 6 member 19	uc003jbw.4;uc003jby.2	340024;348932	-61;-23821
chr5	1332551	1332849	299	*	Intron (uc003jcg.3/81037, intron 5 of 13)	5	1318000	1341975	23976	2	81037	uc003jcg.3	9126	ENSG00000049656	CLPTM1L	CLPTM1 like	uc021xwd.1;uc003jbz.1;uc003jca.1;uc003jcb.1;uc003jcc.1;uc003jcd.1;uc003jce.1;uc021xvz.1;uc021xwa.1;uc021xwb.1;uc021xwc.1;uc003jcg.3;uc003jch.3	100616235;7015;7015;7015;7015;7015;7015;7015;7015;7015;7015;81037;81037	-23059;-49426;-37389;-37389;-37389;-37389;-37389;-49812;-37389;-37389;-37389;0;0
chr5	17519701	17520249	549	*	Distal Intergenic	5	17379015	17387419	8405	2	401177	uc003jga.3	-132282	ENSG00000250822	LINC02111	long intergenic non-protein coding RNA 2111	NA	NA	NA
chr5	17521401	17521849	449	*	Distal Intergenic	5	17379015	17387419	8405	2	401177	uc003jga.3	-133982	ENSG00000250822	LINC02111	long intergenic non-protein coding RNA 2111	NA	NA	NA
chr5	17522951	17523799	849	*	Distal Intergenic	5	17379015	17387419	8405	2	401177	uc003jga.3	-135532	ENSG00000250822	LINC02111	long intergenic non-protein coding RNA 2111	NA	NA	NA
chr5	17525251	17527049	1799	*	Distal Intergenic	5	17379015	17387419	8405	2	401177	uc003jga.3	-137832	ENSG00000250822	LINC02111	long intergenic non-protein coding RNA 2111	NA	NA	NA
chr5	17528801	17528899	99	*	Distal Intergenic	5	17379015	17387419	8405	2	401177	uc003jga.3	-141382	ENSG00000250822	LINC02111	long intergenic non-protein coding RNA 2111	NA	NA	NA
chr5	17529001	17529499	499	*	Distal Intergenic	5	17379015	17387419	8405	2	401177	uc003jga.3	-141582	ENSG00000250822	LINC02111	long intergenic non-protein coding RNA 2111	NA	NA	NA
chr5	17585051	17585649	599	*	Distal Intergenic	5	17379015	17387419	8405	2	401177	uc003jga.3	-197632	ENSG00000250822	LINC02111	long intergenic non-protein coding RNA 2111	NA	NA	NA
chr5	21480151	21480599	449	*	Intron (uc011cnn.1/728411, intron 4 of 8)	5	21459589	21589481	129893	1	728411	uc003jgh.5	20562	ENSG00000291102	GUSBP1	GUSB pseudogene 1	uc011cnn.1;uc003jgf.3;uc003jgg.4;uc010iub.3;uc003jgh.5	728411;728411;728411;728411;728411	0;20562;20562;0;0
chr5	21529001	21529349	349	*	Intron (uc011cnn.1/728411, intron 8 of 8)	5	21459589	21589481	129893	1	728411	uc003jgh.5	69412	ENSG00000291102	GUSBP1	GUSB pseudogene 1	uc011cnn.1;uc010iub.3;uc003jgh.5	728411;728411;728411	0;0;0
chr5	30491301	30491499	199	*	Distal Intergenic	5	31193762	31251961	58200	1	1004	uc003jhc.2	-702263	ENSG00000113361	CDH6	cadherin 6	NA	NA	NA
chr5	32288301	32288549	249	*	Intron (uc003jhq.3/54545, intron 1 of 15)	5	32227111	32313114	86004	2	54545	uc003jhq.3	24565	ENSG00000150712	MTMR12	myotubularin related protein 12	uc003jhq.3;uc010iuk.3;uc010iul.3	54545;54545;54545	0;0;0
chr5	34182601	34182799	199	*	Distal Intergenic	5	34017963	34043371	25409	2	114899	uc003jio.3	-139230	ENSG00000082196	C1QTNF3	C1q and TNF related 3	NA	NA	NA
chr5	34182951	34183049	99	*	Distal Intergenic	5	34017963	34043371	25409	2	114899	uc003jio.3	-139580	ENSG00000082196	C1QTNF3	C1q and TNF related 3	NA	NA	NA
chr5	34183151	34183349	199	*	Distal Intergenic	5	34017963	34043371	25409	2	114899	uc003jio.3	-139780	ENSG00000082196	C1QTNF3	C1q and TNF related 3	NA	NA	NA
chr5	34185801	34186549	749	*	Distal Intergenic	5	34017963	34043371	25409	2	114899	uc003jio.3	-142430	ENSG00000082196	C1QTNF3	C1q and TNF related 3	NA	NA	NA
chr5	34187001	34187399	399	*	Distal Intergenic	5	34017963	34043371	25409	2	114899	uc003jio.3	-143630	ENSG00000082196	C1QTNF3	C1q and TNF related 3	NA	NA	NA
chr5	34191651	34191849	199	*	Distal Intergenic	5	34017963	34043371	25409	2	114899	uc003jio.3	-148280	ENSG00000082196	C1QTNF3	C1q and TNF related 3	NA	NA	NA
chr5	34192851	34193099	249	*	Exon (uc021xxh.1/uc021xxh.1, exon 1 of 1)	5	34017963	34043371	25409	2	114899	uc003jio.3	-149480	ENSG00000082196	C1QTNF3	C1q and TNF related 3	NA	NA	NA
chr5	40802151	40802299	149	*	Distal Intergenic	5	40759481	40798297	38817	2	5562	uc003jmc.3	-3854	ENSG00000132356	PRKAA1	protein kinase AMP-activated catalytic subunit alpha 1	uc021xxr.1;uc003jma.3;uc010ivg.3;uc011cpm.2;uc003jmb.3;uc003jmc.3;uc003jme.1;uc003jmf.1;uc003jmg.3	100506548;23548;23548;23548;5562;5562;6167;619564;84674	26945;-46079;-46079;-46079;-3854;-3854;33088;30538;-39111
chr5	42981001	42981349	349	*	Distal Intergenic	5	43014831	43018913	4083	2	648987	uc003jnc.3	37564	ENSG00000177738	ANXA2R-OT1	ANXA2R overlapping transcript 1	uc003jnc.3;uc003jnd.3;uc021xye.1	648987;648987;648987	37564;37564;37564
chr5	42982201	42982349	149	*	Distal Intergenic	5	43014831	43018913	4083	2	648987	uc003jnc.3	36564	ENSG00000177738	ANXA2R-OT1	ANXA2R overlapping transcript 1	uc003jnc.3;uc003jnd.3;uc021xye.1	648987;648987;648987	36564;36564;36564
chr5	42992101	42993499	1399	*	Exon (uc003jnb.1/uc003jnb.1, exon 1 of 2)	5	43014831	43018913	4083	2	648987	uc003jnc.3	25414	ENSG00000177738	ANXA2R-OT1	ANXA2R overlapping transcript 1	uc003jng.2;uc003jni.2;uc003jnf.3;uc003jnc.3;uc003jnd.3;uc021xye.1	153684;153684;389289;648987;648987;648987	-48178;-48737;46948;25414;25414;25414
chr5	46325351	46325999	649	*	Distal Intergenic	5	45255052	45696220	441169	2	348980	uc003jok.3	-629131	ENSG00000164588	HCN1	hyperpolarization activated cyclic nucleotide gated potassium channel 1	NA	NA	NA
chr5	46333051	46333199	149	*	Distal Intergenic	5	45255052	45696220	441169	2	348980	uc003jok.3	-636831	ENSG00000164588	HCN1	hyperpolarization activated cyclic nucleotide gated potassium channel 1	NA	NA	NA
chr5	46346201	46346599	399	*	Distal Intergenic	5	45255052	45696220	441169	2	348980	uc003jok.3	-649981	ENSG00000164588	HCN1	hyperpolarization activated cyclic nucleotide gated potassium channel 1	NA	NA	NA
chr5	46346701	46347549	849	*	Distal Intergenic	5	45255052	45696220	441169	2	348980	uc003jok.3	-650481	ENSG00000164588	HCN1	hyperpolarization activated cyclic nucleotide gated potassium channel 1	NA	NA	NA
chr5	46397101	46397449	349	*	Distal Intergenic	5	45255052	45696220	441169	2	348980	uc003jok.3	-700881	ENSG00000164588	HCN1	hyperpolarization activated cyclic nucleotide gated potassium channel 1	NA	NA	NA
chr5	49447901	49448299	399	*	Distal Intergenic	5	49692031	49699299	7269	2	133418	uc010ivq.3	251000	ENSG00000170571	EMB	embigin	NA	NA	NA
chr5	49461051	49461349	299	*	Distal Intergenic	5	49692031	49699299	7269	2	133418	uc010ivq.3	237950	ENSG00000170571	EMB	embigin	NA	NA	NA
chr5	49488451	49488899	449	*	Distal Intergenic	5	49692031	49699299	7269	2	133418	uc010ivq.3	210400	ENSG00000170571	EMB	embigin	NA	NA	NA
chr5	49517201	49517349	149	*	Distal Intergenic	5	49692031	49699299	7269	2	133418	uc010ivq.3	181950	ENSG00000170571	EMB	embigin	NA	NA	NA
chr5	49550751	49550849	99	*	Distal Intergenic	5	49692031	49699299	7269	2	133418	uc010ivq.3	148450	ENSG00000170571	EMB	embigin	NA	NA	NA
chr5	55333401	55333699	299	*	Distal Intergenic	5	55290995	55299475	8481	1	441072	uc003jqs.3	42406	ENSG00000227908	IL6ST-DT	IL6ST divergent transcript	uc003jqq.3;uc003jqr.3;uc010iwb.3;uc003jqs.3	3572;3572;3572;441072	-42580;-42580;-42580;42406
chr5	56469351	56469849	499	*	Promoter (<=1kb)	5	56469775	56560506	90732	1	65056	uc003jrh.4	0	ENSG00000062194	GPBP1	GC-rich promoter binding protein 1	uc003jrh.4;uc003jri.4;uc003jrj.4;uc003jrk.4	65056;65056;65056;65056	0;0;-1426;-40052
chr5	64064451	64064799	349	*	Promoter (<=1kb)	5	64064755	64104388	39634	1	10283	uc003jtl.3	0	ENSG00000153015	CWC27	CWC27 spliceosome associated cyclophilin	uc003jtl.3;uc003jtm.3;uc003jtn.1;uc010iwt.1;uc003jtk.3;uc021xzh.1	10283;10283;10283;10283;285672;285672	0;0;0;0;0;0
chr5	65221351	65221749	399	*	Promoter (<=1kb)	5	65222382	65376851	154470	1	55914	uc003jui.2	-633	ENSG00000112851	ERBIN	erbb2 interacting protein	uc021xzj.1;uc003jui.2;uc003juj.2;uc003juk.2;uc003jul.2;uc011cqx.2;uc011cqy.2;uc011cqz.2	100303749;55914;55914;55914;55914;55914;55914;55914	19652;-633;-633;-633;-633;-633;-633;-633
chr5	68665001	68665299	299	*	Promoter (<=1kb)	5	68665124	68710630	45507	1	5884	uc003jwg.3	0	ENSG00000152942	RAD17	RAD17 checkpoint clamp loader component	uc003jwq.3;uc010ixf.3;uc003jws.1;uc003jvv.1;uc003jvx.1;uc003jvy.2;uc003jvw.2;uc003jvz.1;uc003jwg.3;uc003jwh.3;uc003jwi.3;uc003jwj.3;uc003jwk.3;uc003jwl.3;uc003jwm.3;uc003jwn.3;uc003jwo.3;uc003jwa.3;uc003jwb.3;uc003jwc.1;uc003jwe.1;uc003jwf.1	153562;153562;153562;202243;202243;202243;202243;202243;5884;5884;5884;5884;5884;5884;5884;5884;5884;6880;6880;6880;6880;6880	-45640;-45640;-49899;-48594;-48594;-48594;-36381;-45327;0;-340;-340;-340;-588;-1233;-1563;-1563;-1982;0;0;-2357;0;0
chr5	69472651	69473199	549	*	Intron (uc011crh.2/uc011crh.2, intron 3 of 7)	5	69434954	69517842	82889	2	11039	uc003jyo.1	44643	NA	GUSBP14	GUSB pseudogene 14	uc010ixu.3;uc021yaa.1;uc003jyo.1;uc003jyp.1;uc003jys.3;uc011crn.1;uc003jyr.1;uc003jxm.3	11039;11039;11039;11039;11039;11039;11042;653188	0;0;0;81665;408350;339110;378001;0
chr5	70067451	70067699	249	*	Intron (uc011crh.2/uc011crh.2, intron 3 of 7)	5	70196490	70203944	7455	1	8293	uc003mqa.3	-128791	ENSG00000172058	SERF1A	small EDRK-rich factor 1A	NA	NA	NA
chr5	70515351	70515699	349	*	Intron (uc010iyn.3/100049076, intron 3 of 10)	5	70516053	70555172	39120	2	100049076	uc011crx.1	39473	NA	GUSBP17	GUSB pseudogene 17	uc010iyn.3;uc011crx.1;uc003kbk.3	100049076;100049076;100049076	0;0;69824
chr5	70526951	70527449	499	*	Intron (uc010iyn.3/100049076, intron 3 of 10)	5	70516053	70555172	39120	2	100049076	uc011crx.1	27723	NA	GUSBP17	GUSB pseudogene 17	uc010iyn.3;uc011crx.1;uc003kbk.3	100049076;100049076;100049076	0;0;58074
chr5	72252151	72252649	499	*	Promoter (<=1kb)	5	72251808	72386349	134542	1	115548	uc011csl.2	343	ENSG00000157107	FCHO2	FCH and mu domain containing endocytic adaptor 2	uc011csk.1;uc003kcl.3;uc011csl.2;uc003kck.4;uc003kci.4;uc003kcg.4	115548;115548;115548;3842;3842;3842	0;0;0;139733;108221;108131
chr5	72794401	72794949	549	*	Promoter (<=1kb)	5	72794250	72801448	7199	1	689	uc003kcr.1	151	ENSG00000145741	BTF3	basic transcription factor 3	uc010izd.1;uc003kcq.1;uc003kcr.1	689;689;689	0;0;0
chr5	77071651	77071799	149	*	Promoter (<=1kb)	5	76986995	77072185	85191	2	6902	uc003kfh.1	386	ENSG00000171530	TBCA	tubulin folding cofactor A	uc003kfh.1;uc003kfi.1	6902;6902	0;0
chr5	77883551	77883799	249	*	Intron (uc003kfo.3/10184, intron 2 of 4)	5	77920640	77937985	17346	2	10184	uc003kfp.1	54186	ENSG00000145685	LHFPL2	LHFPL tetraspan subfamily member 2	uc003kfo.3;uc003kfp.1	10184;10184	0;54186
chr5	78907951	78908249	299	*	Promoter (<=1kb)	5	78908243	78982471	74229	1	167153	uc003kfz.2	0	ENSG00000164329	TENT2	terminal nucleotidyltransferase 2	uc003kfz.2;uc003kga.2;uc003kgb.2;uc010jae.1;uc010jaf.1	167153;167153;167153;167153;167153	0;0;0;0;0
chr5	90675551	90675799	249	*	Promoter (<=1kb)	5	90676164	90716532	40369	1	100129716	uc003kka.4	-365	ENSG00000281357	ARRDC3-AS1	ARRDC3 antisense RNA 1	uc003kka.4;uc003kjz.2	100129716;57561	-365;0
chr5	93009951	93010149	199	*	Intron (uc010jbd.3/83989, intron 10 of 10)	5	92956402	92956494	93	2	100313887	uc021ybl.1	-53457	ENSG00000284336	MIR2277	microRNA 2277	uc010jbd.3;uc011cuf.2;uc011cug.2;uc011cuh.2;uc011cui.2;uc011cuj.2	83989;83989;83989;83989;83989;83989	0;0;0;0;0;0
chr5	94982501	94982649	149	*	Promoter (<=1kb)	5	94982583	94992849	10267	1	317671	uc003klf.3	0	ENSG00000175449	RFESD	Rieske Fe-S domain containing	uc003kld.3;uc010jbg.3;uc011cum.2;uc003kle.1;uc003klg.3;uc003klf.3;uc011cun.2;uc010jbh.1;uc003klh.1;uc003kli.1;uc003klj.1	153642;153642;153642;285601;317671;317671;317671;83890;83890;83890;83890	91676;91676;91676;26521;0;0;0;36046;36065;36065;36065
chr5	96077601	96078099	499	*	Promoter (<=1kb)	5	96077578	96108591	31014	1	831	uc010jbk.2	23	ENSG00000153113	CAST	calpastatin	uc003kml.3;uc010jbm.2;uc003kmm.3;uc003kmn.3;uc003klt.3;uc021ybr.1;uc003klx.3;uc011cuo.1;uc003klz.1;uc011cup.2;uc011cuq.2;uc021ybs.1;uc021ybt.1;uc003kma.2;uc011cur.2;uc011cus.2;uc011cut.2;uc003kmd.3;uc003kmh.3;uc010jbj.3;uc010jbk.2;uc003kmi.3;uc010jbl.2;uc003kmk.3	51752;51752;51752;51752;831;831;831;831;831;831;831;831;831;831;831;831;831;831;831;831;831;831;831;831	65793;71749;65793;71749;0;0;0;0;0;39108;0;0;0;0;0;0;0;0;0;0;0;-1145;-1145;-15188
chr5	96270951	96271149	199	*	Promoter (<=1kb)	5	96271346	96365115	93770	1	4012	uc003kmv.1	-197	ENSG00000113441	LNPEP	leucyl and cystinyl aminopeptidase	uc003kmv.1;uc003kmw.1;uc003kmq.3;uc003kmr.3;uc003kms.3;uc003kmt.3;uc003kmu.3	4012;4012;64167;64167;64167;64167;64167	-197;-23007;59307;59307;59307;59307;55683
chr5	100420201	100420399	199	*	Distal Intergenic	5	100221015	100238987	17973	2	7903	uc003knl.3	-181214	ENSG00000113532	ST8SIA4	ST8 alpha-N-acetyl-neuraminide alpha-2,8-sialyltransferase 4	NA	NA	NA
chr5	102201601	102201749	149	*	Promoter (<=1kb)	5	102201527	102366808	165282	1	5066	uc011cuz.2	74	ENSG00000145730	PAM	peptidylglycine alpha-amidating monooxygenase	uc003kns.3;uc003knt.3;uc003knu.3;uc003knv.3;uc003knw.3;uc011cuz.2	5066;5066;5066;5066;5066;5066	0;0;0;0;0;0
chr5	109026601	109026799	199	*	Promoter (1-2kb)	5	109025156	109203429	178274	1	4124	uc003kou.1	1445	ENSG00000112893	MAN2A1	mannosidase alpha class 2A member 1	uc003kot.1;uc003kou.1	4124;4124	0;0
chr5	111496201	111496599	399	*	Promoter (<=1kb)	5	111496223	111498198	1976	1	114915	uc003kpq.2	0	NA	EPB41L4A-AS1	EPB41L4A antisense RNA 1	uc003kpq.2;uc003kpp.1;uc003kpu.1;uc003kpv.1;uc003kpt.1	114915;64097;64097;64097;654322	0;0;9373;258411;-583
chr5	111884001	111884399	399	*	Distal Intergenic	5	111755280	111756677	1398	1	54508	uc003kpx.2	128721	ENSG00000278921	EPB41L4A-DT	EPB41L4A divergent transcript	NA	NA	NA
chr5	115177701	115177849	149	*	Promoter (<=1kb)	5	115177619	115249778	72160	1	1176	uc003krl.3	82	ENSG00000177879	AP3S1	adaptor related protein complex 3 subunit sigma 1	uc003krg.3;uc003krk.3;uc003krl.3;uc003krh.3;uc003kri.4;uc021ycr.1;uc021ycs.1;uc031sku.1	1036;1176;1176;9140;9140;9140;9140;9140	-25296;0;0;-153;-153;-153;-153;-153
chr5	121449001	121449249	249	*	Distal Intergenic	5	121465215	121489266	24052	1	133923	uc003ksv.3	-15966	ENSG00000164185	ZNF474	zinc finger protein 474	uc021ycz.1;uc003ksv.3;uc010jcp.3;uc010jcq.3;uc010jcr.3;uc011cwk.2;uc003ksu.3	100505841;133923;4015;4015;4015;4015;4015	-46622;-15966;-39129;-37209;-36132;-36083;-34946
chr5	131330251	131330599	349	*	Promoter (<=1kb)	5	131142684	131329971	187288	2	23305	uc003kvv.2	-280	ENSG00000164398	ACSL6	acyl-CoA synthetase long chain family member 6	uc003kvv.2;uc003kvw.2;uc010jdn.2;uc003kvx.2;uc003kvy.2;uc003kwb.3;uc003kvz.2;uc010jdo.2;uc021ydh.1;uc003kwa.2;uc010jdp.1;uc003kwc.1;uc003kwd.1;uc031skz.1	23305;23305;23305;23305;23305;23305;23305;23305;23305;23305;23305;23305;23305;728637	-280;-20523;-307;0;0;0;0;0;0;0;-7704;0;0;-48860
chr5	131651301	131651549	249	*	Intron (uc003kwq.3/6583, intron 3 of 9)	5	131631118	131663096	31979	1	6583	uc010jdq.1	20183	ENSG00000197208	SLC22A4	solute carrier family 22 member 4	uc021ydk.1;uc021ydj.1;uc003kwq.3;uc010jdq.1;uc003kwn.3;uc003kwo.3;uc003kwp.3	100500865;553103;6583;6583;8572;8572;8572	49742;0;0;0;57950;57950;57950
chr5	131758451	131758599	149	*	Intron (uc003kwy.3/441108, intron 2 of 3)	5	131746465	131822549	76085	1	441108	uc010jds.2	11986	NA	CARINH	colitis associated IRF1 antisense regulator of intestinal homeostasis	uc003kxd.2;uc003kwy.3;uc003kwz.2;uc010jds.2;uc003kww.4;uc003kwx.4;uc010jdr.1	3659;441108;441108;441108;6584;6584;6584	67866;0;0;0;53050;53050;37431
chr5	131831351	131831799	449	*	Promoter (<=1kb)	5	131817301	131831259	13959	2	3659	uc003kxb.2	-92	ENSG00000125347	IRF1	interferon regulatory factor 1	uc003kxe.1;uc003kxd.2;uc003kxa.2;uc003kxb.2;uc010jdt.2;uc003kwy.3;uc003kwz.2;uc010jds.2	3567;3659;3659;3659;3659;441108;441108;441108	47415;-4886;-4886;-92;-6176;0;0;0
chr5	133238201	133238599	399	*	Distal Intergenic	5	133291198	133304406	13209	2	56951	uc003kyo.3	65807	ENSG00000113583	C5orf15	chromosome 5 open reading frame 15	NA	NA	NA
chr5	133268401	133268649	249	*	Distal Intergenic	5	133291198	133304406	13209	2	56951	uc003kyo.3	35757	ENSG00000113583	C5orf15	chromosome 5 open reading frame 15	uc003kyo.3;uc003kyp.2;uc003kyq.2;uc003kyr.2;uc031slc.1	56951;7416;7416;7416;7416	35757;72008;72008;72175;173455
chr5	133801501	133801899	399	*	Distal Intergenic	5	133737756	133747598	9843	2	91368	uc011cxs.2	-53903	ENSG00000237190	CDKN2AIPNL	CDKN2A interacting protein N-terminal like	NA	NA	NA
chr5	133802001	133802549	549	*	Distal Intergenic	5	133737756	133747598	9843	2	91368	uc011cxs.2	-54403	ENSG00000237190	CDKN2AIPNL	CDKN2A interacting protein N-terminal like	NA	NA	NA
chr5	134469751	134470249	499	*	Intron (uc003laj.2/100996485, intron 2 of 5)	5	134363424	134369964	6541	2	5307	uc010jea.3	-99787	ENSG00000069011	PITX1	paired like homeodomain 1	uc003laj.2	100996485	0
chr5	134471701	134472049	349	*	Intron (uc003laj.2/100996485, intron 2 of 5)	5	134363424	134369964	6541	2	5307	uc010jea.3	-101737	ENSG00000069011	PITX1	paired like homeodomain 1	uc003laj.2	100996485	0
chr5	134717901	134718099	199	*	Intron (uc003lam.1/9555, intron 2 of 8)	5	134670071	134734928	64858	2	9555	uc003lam.1	16829	ENSG00000113648	MACROH2A1	macroH2A.1 histone	uc003laj.2;uc003lal.1;uc003lam.1;uc003lan.1;uc003lao.1;uc011cxz.1;uc003las.1;uc003lat.1	100996485;9555;9555;9555;9555;9555;9555;9555	0;-30667;0;0;0;0;0;0
chr5	137673151	137673949	799	*	Promoter (<=1kb)	5	137673224	137685418	12195	1	51307	uc003lcv.3	0	ENSG00000120709	FAM53C	family with sequence similarity 53 member C	uc003lcv.3;uc003lcw.3;uc011cyq.2;uc011cyr.2;uc003lcy.1;uc010jew.1;uc011cys.1;uc003lcp.1;uc003lcq.1;uc003lcr.1;uc003lcs.1;uc011cyp.1;uc003lct.1;uc003lcu.1;uc010jet.1;uc031slf.1	51307;51307;51307;51307;51780;51780;51780;995;995;995;995;995;995;995;995;995	0;0;0;0;-14336;-34414;-48029;-5635;-5635;-5635;0;0;-6248;-6248;-6248;-8576
chr5	138068201	138068549	349	*	Distal Intergenic	5	138089107	138270723	181617	1	1495	uc003ldh.3	-20558	ENSG00000044115	CTNNA1	catenin alpha 1	uc003ldh.3;uc003ldi.3;uc011cyx.2;uc011cyy.2;uc003ldj.3	1495;1495;1495;1495;1495	-20558;-20558;-20558;-20558;-49063
chr5	138568001	138568399	399	*	Distal Intergenic	5	138282410	138534065	251656	2	64374	uc003ldp.3	-33936	ENSG00000120725	SIL1	SIL1 nucleotide exchange factor	uc003ldv.1;uc003ldo.3;uc003ldp.3;uc010jfa.3;uc003ldr.3;uc003lds.3;uc003ldt.3;uc003ldu.3;uc010jfb.3	26821;64374;64374;724102;724102;9782;9782;9782;9782	-46070;-33936;-33936;-41042;-41042;-41042;-41042;-41042;-41042
chr5	139049501	139050049	549	*	Intron (uc010jfg.1/51523, intron 1 of 2)	5	139028518	139062680	34163	1	51523	uc003let.2	20983	ENSG00000171604	CXXC5	CXXC finger protein 5	uc010jfg.1;uc003let.2;uc003leq.3;uc003ler.3	51523;51523;7322;7322	0;0;108750;108750
chr5	139077151	139077299	149	*	Distal Intergenic	5	139028518	139062680	34163	1	51523	uc003let.2	48633	ENSG00000171604	CXXC5	CXXC finger protein 5	uc010jfg.1;uc003let.2	51523;51523	0;0
chr5	139990751	139990899	149	*	Distal Intergenic	5	140011313	140013035	1723	2	929	uc003lgi.2	22136	ENSG00000170458	CD14	CD14 molecule	uc003lgb.1;uc003lgc.1;uc003lgd.1;uc003lge.1;uc003lgf.1;uc010jfp.1;uc011czi.1;uc021yeg.1;uc021yeh.1;uc010jfq.1;uc010jfr.1;uc003lgg.1;uc003lgh.1;uc011czk.1;uc003lgq.3;uc021yen.1;uc003lgp.3;uc021yem.1;uc011czj.1;uc003lgl.3;uc003lgm.3;uc010jft.3;uc003lgn.3;uc003lgo.3;uc003lgi.2;uc003lgj.2;uc021yej.1;uc021yek.1	10307;10307;10307;10307;10307;10307;10307;10307;10307;10307;10307;113829;113829;3550;3550;3550;4695;4695;55374;55374;55374;55374;55374;55374;929;929;929;929	-48259;-46791;-46562;-46562;-46562;-46562;-46562;-46562;-46562;-49465;-46562;46331;46275;-36485;-36485;-40774;36471;36471;-28113;-28113;-28113;-28139;-29992;-31136;22136;22387;22387;22387
chr5	140058701	140058899	199	*	Exon (uc003lgu.3/3035, exon 4 of 12)	5	140050381	140053171	2791	2	373863	uc003lgt.3	-5530	ENSG00000256453	DND1	DND microRNA-mediated repression inhibitor 1	uc003lgy.1;uc010jfv.1;uc003lgx.3;uc011czr.2;uc011czs.2;uc011czt.2;uc011czu.2;uc003lgu.3;uc003lgv.4;uc003lgw.4;uc011czm.3;uc011czn.3;uc011czo.3;uc011czp.3;uc011czq.3;uc011czk.1;uc003lgq.3;uc021yen.1;uc003lgt.3;uc003lgp.3;uc021yem.1;uc003lgr.4;uc011czl.1;uc011czj.1;uc003lgl.3;uc003lgm.3;uc010jft.3;uc003lgn.3;uc003lgo.3;uc011czx.1;uc011czw.1;uc011czv.1;uc003lgi.2;uc003lgj.2;uc021yej.1;uc021yek.1	153527;23438;23438;23438;23438;23438;23438;3035;3035;3035;3035;3035;3035;3035;3035;3550;3550;3550;373863;4695;4695;54853;54853;55374;55374;55374;55374;55374;55374;56662;56663;56664;929;929;929;929	-21133;-12119;-12119;-12119;-12119;-12119;-16194;0;0;0;0;0;0;0;0;31317;31317;27028;-5530;-31331;-31331;14317;10504;39689;39689;39689;39663;37810;36666;-46845;-39612;-31962;-45666;-45415;-45415;-45415
chr5	140998451	140998849	399	*	Promoter (<=1kb)	5	140894588	140998622	104035	2	1729	uc003llb.4	0	ENSG00000131504	DIAPH1	diaphanous related formin 1	uc003llb.4;uc003llc.4;uc021yep.1;uc021yeq.1;uc010jgc.1;uc003llh.3;uc003lli.3;uc003lll.3;uc011dbe.2;uc003llm.3;uc003lln.3;uc003lle.1;uc003llf.2;uc010jgd.1;uc010jge.1;uc010jgg.3;uc003llj.3;uc003llk.3	1729;1729;1729;1729;1729;285613;285613;64411;64411;64411;64411;8841;8841;8841;8841;89848;89848;89848	0;0;0;0;-44676;-17668;-17668;47462;53878;62951;62951;15880;17574;17574;17574;28238;31835;32137
chr5	145234251	145234549	299	*	Distal Intergenic	5	145239296	145252531	13236	2	643226	uc003lns.1	17982	ENSG00000204928	GRXCR2	glutaredoxin and cysteine rich domain containing 2	uc003lno.1;uc003lnp.1;uc003lnq.1;uc003lnr.1;uc003lns.1	153768;153768;153768;153768;643226	-19352;-19352;-19352;-19352;17982
chr5	148442701	148442899	199	*	Promoter (<=1kb)	5	147929700	148442737	513038	2	79628	uc003lpp.1	0	ENSG00000169247	SH3TC2	SH3 domain and tetratricopeptide repeats 2	uc003lpp.1;uc010jgw.3;uc003lps.3;uc003lpt.3;uc003lpu.3;uc010jgx.3;uc003lpv.1;uc011dbz.1;uc003lpw.1	79628;79628;79628;79628;79628;79628;79628;79628;79628	0;-31451;-21521;0;0;0;0;0;0
chr5	149292951	149293199	249	*	Intron (uc003lrg.4/5145, intron 6 of 21)	5	149237519	149324356	86838	2	5145	uc003lrg.4	31157	ENSG00000132915	PDE6A	phosphodiesterase 6A	uc003lrh.3;uc003lrg.4;uc021yfs.1	1836;5145;5145	-47101;0;0
chr5	150479801	150479999	199	*	Distal Intergenic	5	150409504	150467221	57718	2	10318	uc021ygb.1	-12580	ENSG00000145901	TNIP1	TNFAIP3 interacting protein 1	uc010jhl.3;uc010jho.2;uc010jhp.2;uc010jhq.2;uc010jhm.4;uc010jhn.4;uc003ltg.4;uc003lti.4;uc010jhr.3;uc011dco.3;uc031slv.1;uc003ltj.3;uc003ltk.3;uc021ygb.1;uc010jhs.2;uc011dcp.2;uc003ltl.2;uc003lto.2	10318;10318;10318;10318;10318;10318;10318;10318;10318;10318;10318;10318;10318;10318;10318;309;309;309	-36493;-36493;-36493;-36493;-35113;-35113;-19152;-19152;-19152;-19152;-19152;-13054;-13054;-12580;-13054;41217;57444;57444
chr5	150593701	150593949	249	*	Intron (uc003ltq.3/26112, intron 1 of 8)	5	150560613	150585036	24424	2	26112	uc011dcq.3	-8665	ENSG00000198624	CCDC69	coiled-coil domain containing 69	uc031slw.1;uc011dcq.3;uc003ltq.3;uc010jhu.3;uc003ltr.4;uc011dcr.2;uc003ltt.1	26112;26112;26112;26112;2760;2760;2760	-28925;-8665;0;0;-38664;-38664;-45367
chr5	151151751	151152049	299	*	Promoter (<=1kb)	5	151151476	151184915	33440	1	10146	uc011dcu.2	275	ENSG00000145907	G3BP1	G3BP stress granule assembly factor 1	uc021ygc.2;uc010jhy.1;uc003lum.3;uc003lun.3;uc010jhz.3;uc011dcu.2;uc003luq.3;uc003luk.3	100652758;10146;10146;10146;10146;10146;10146;475	-682;0;0;0;0;0;-22991;-13541
chr5	151152201	151152549	349	*	Promoter (<=1kb)	5	151151476	151184915	33440	1	10146	uc011dcu.2	725	ENSG00000145907	G3BP1	G3BP stress granule assembly factor 1	uc021ygc.2;uc010jhy.1;uc003lum.3;uc003lun.3;uc010jhz.3;uc011dcu.2;uc003luq.3;uc003lur.3;uc003lus.3;uc003lut.3;uc003luk.3	100652758;10146;10146;10146;10146;10146;10146;2741;2741;2741;475	-1132;0;0;0;0;0;-22491;151848;151848;151848;-13991
chr5	153753401	153753749	349	*	Intron (uc003lvg.1/55568, intron 4 of 6)	5	153769329	153825382	56054	2	386627	uc003lvi.3	71633	ENSG00000245275	SAP30L-AS1	SAP30L antisense RNA 1 (head to head)	uc003lvi.3;uc003lvg.1;uc003lvh.3;uc010jic.3;uc010jid.3	386627;55568;55568;55568;55568	71633;0;0;0;0
chr5	154033451	154033849	399	*	Distal Intergenic	5	153975572	153975632	61	2	100422950	uc021ygg.1	-57819	ENSG00000264760	MIR3141	microRNA 3141	NA	NA	NA
chr5	154062201	154062749	549	*	Distal Intergenic	5	154092462	154197167	104706	1	23367	uc003lvo.4	-29713	ENSG00000155506	LARP1	La ribonucleoprotein 1, translational regulator	uc003lvo.4	23367	0
chr5	154135151	154136699	1549	*	Promoter (<=1kb)	5	154135135	154183305	48171	1	23367	uc021ygi.1	16	ENSG00000155506	LARP1	La ribonucleoprotein 1, translational regulator	uc003lvo.4;uc021ygh.2;uc021ygi.1;uc010jie.1	23367;23367;23367;23367	0;0;0;-64
chr5	158634901	158635199	299	*	Promoter (<=1kb)	5	158584417	158635140	50724	2	153830	uc011ddz.2	0	ENSG00000145860	RNF145	ring finger protein 145	uc011ddy.2;uc003lxo.2;uc011ddz.2;uc003lxp.3;uc010jiq.2;uc011dea.2	153830;153830;153830;153830;153830;153830	-245;-67;0;0;0;0
chr5	159687901	159688249	349	*	Intron (uc003lyb.1/79616, intron 4 of 6)	5	159656437	159665729	9293	1	2172	uc003lya.1	31464	ENSG00000170231	FABP6	fatty acid binding protein 6	uc003lxx.1;uc003lxz.1;uc003lya.1;uc003lyb.1;uc011dee.1;uc003lyc.1;uc011def.1	2172;2172;2172;79616;79616;79616;79616	73527;61853;31464;0;0;0;0
chr5	168083001	168083449	449	*	Distal Intergenic	5	167982628	168006614	23987	2	79646	uc003lzz.2	-76387	ENSG00000120137	PANK3	pantothenate kinase 3	uc003mab.4;uc010jjg.4	6586;6586	644684;644684
chr5	169705651	169705949	299	*	Intron (uc003man.1/3937, intron 3 of 20)	5	169687837	169695486	7650	2	3937	uc010jjo.1	-10165	ENSG00000043462	LCP2	lymphocyte cytosolic protein 2	uc010jjn.3;uc003mal.2;uc011des.1;uc003man.1;uc011det.1;uc010jjo.1	133874;133874;3937;3937;3937;3937	45701;45701;-11387;0;0;-10165
chr5	169733451	169733849	399	*	Distal Intergenic	5	169675088	169724822	49735	2	3937	uc011det.1	-8629	ENSG00000043462	LCP2	lymphocyte cytosolic protein 2	uc011deu.1;uc003map.3;uc011des.1;uc003man.1;uc011det.1;uc010jjo.1	257358;30820;3937;3937;3937;3937	-24586;-47032;-39187;0;0;-37965
chr5	172199451	172199799	349	*	Promoter (1-2kb)	5	172195093	172198203	3111	2	1843	uc003mbv.2	-1248	ENSG00000120129	DUSP1	dual specificity phosphatase 1	uc003mbu.2;uc003mbv.2	1843;1843	-1817;-1248
chr5	173287601	173288049	449	*	Distal Intergenic	5	173315331	173383823	68493	1	80315	uc010jju.2	-27282	ENSG00000113742	CPEB4	cytoplasmic polyadenylation element binding protein 4	uc010jju.2;uc003mcs.4;uc010jjv.3;uc011dfg.2;uc003mcu.4	80315;80315;80315;80315;80315	-27282;-27282;-27282;-27282;-32032
chr5	175624051	175624799	749	*	Promoter (1-2kb)	5	175570088	175626298	56211	2	643201	uc003mdn.3	1499	ENSG00000248596	CEP192P1	CEP192 pseudogene 1	uc011dfk.1;uc003mdr.3;uc003mds.4;uc003mdt.4;uc003mdn.3;uc003mdo.1	375484;375484;375484;375484;643201;643201	-40571;-40571;-40571;-40571;0;0
chr5	175870901	175871149	249	*	Distal Intergenic	5	175875356	175937075	61720	1	23197	uc003mej.4	-4207	ENSG00000113194	FAF2	Fas associated factor family member 2	uc003meh.4;uc003mei.4;uc011dfn.3;uc003mej.4	1212;1212;1212;23197	-27331;-27331;-27331;-4207
chr5	176852901	176853099	199	*	Promoter (<=1kb)	5	176853687	176868354	14668	1	2870	uc003mgq.2	-588	ENSG00000198055	GRK6	G protein-coupled receptor kinase 6	uc011dga.1;uc003mgx.2;uc003mgy.2;uc010jkn.1;uc003mgz.1;uc003mgo.4;uc003mgq.2;uc021yit.1;uc021yiu.1;uc003mgs.1;uc003mgt.3;uc021yiv.1;uc003mgl.2;uc021yis.1;uc003mgk.4;uc003mgu.2;uc003mgv.2;uc003mgw.2	1627;1627;1627;1627;1627;2161;2870;2870;2870;2870;340037;340037;345456;6569;6569;80758;80758;80758	36291;46772;47595;47595;42801;-16324;-588;-588;-588;-5613;21846;21846;-25264;41469;41469;-20697;-20697;-22227
chr5	177368251	177368799	549	*	Intron (uc031sme.1/728554, intron 5 of 5)	5	177419236	177423243	4008	2	5626	uc003mif.1	54444	ENSG00000175325	PROP1	PROP paired-like homeobox 1	uc031sme.1	728554	0
chr5	177407401	177407599	199	*	Distal Intergenic	5	177419236	177423243	4008	2	5626	uc003mif.1	15644	ENSG00000175325	PROP1	PROP paired-like homeobox 1	uc003mif.1;uc011dge.2;uc031smf.1;uc031sme.1	5626;653316;653316;728554	15644;-26368;-28387;0
chr5	177554451	177554799	349	*	Distal Intergenic	5	177558028	177575479	17452	1	64777	uc003mim.3	-3229	ENSG00000145916	RMND5B	required for meiotic nuclear division 5 homolog B	uc003mik.1;uc003mir.2;uc003mis.2;uc003mim.3;uc003min.3;uc003mio.3;uc011dgf.2;uc003miq.3	23138;55651;55651;64777;64777;64777;64777;64777	13895;26162;26162;0;0;0;-10310;-13542
chr5	177557701	177558199	499	*	Promoter (<=1kb)	5	177558028	177575479	17452	1	64777	uc003mim.3	0	ENSG00000145916	RMND5B	required for meiotic nuclear division 5 homolog B	uc003mik.1;uc003mir.2;uc003mis.2;uc003mim.3;uc003min.3;uc003mio.3;uc011dgf.2;uc003miq.3	23138;55651;55651;64777;64777;64777;64777;64777	17145;22762;22762;0;0;0;-6910;-10142
chr5	177631651	177632449	799	*	Promoter (<=1kb)	5	177631534	177638184	6651	1	3182	uc003mix.3	117	ENSG00000197451	HNRNPAB	heterogeneous nuclear ribonucleoprotein A/B	uc003miu.3;uc003miv.3;uc003mix.3;uc003mit.1;uc003miy.3;uc003mjc.3;uc003miz.3;uc003mja.3;uc003mjb.3;uc003mjd.1;uc010jkt.2;uc021yiy.1;uc021yiz.1	3182;3182;3182;64396;85007;85007;85007;85007;85007;85007;91522;91522;91522	0;0;0;-17218;20631;27343;27354;27354;27354;19562;64915;385107;385107
chr5	179160101	179160549	449	*	Promoter (<=1kb)	5	179159851	179223512	63662	1	9794	uc003mkn.1	250	ENSG00000161021	MAML1	mastermind like transcriptional coactivator 1	uc011dgp.2;uc010jlb.1;uc003mkk.3;uc003mkl.3;uc011dgq.2;uc003mkm.3;uc003mkn.1	821;821;821;821;821;9794;9794	34673;34171;34171;34171;34171;0;0
chr5	179230651	179230949	299	*	Promoter (<=1kb)	5	179224598	179229875	5278	2	11282	uc003mkr.3	-776	ENSG00000161013	MGAT4B	alpha-1,3-mannosyl-glycoprotein 4-beta-N-acetylglucosaminyltransferase B	uc021yjg.1;uc003mkp.3;uc003mkq.3;uc003mkr.3;uc003mks.3;uc003mko.3;uc003mky.2;uc011dgt.1;uc011dgu.1;uc003mla.3;uc003mlb.3;uc003mlc.3;uc011dgr.2;uc011dgs.2;uc003mkt.1;uc003mkw.4;uc003mkx.3;uc003mkm.3;uc003mkn.1	100302156;11282;11282;11282;11282;4056;51149;51149;51149;51149;51149;51149;8878;8878;8878;8878;8878;9794;9794	-5305;-2184;-1682;-776;0;9665;54891;54891;54891;54891;54891;54891;0;0;-3375;-16893;-18536;0;0
chr5	179232351	179232599	249	*	Promoter (<=1kb)	5	179233388	179265077	31690	1	8878	uc011dgr.2	-789	ENSG00000161011	SQSTM1	sequestosome 1	uc021yjg.1;uc003mkp.3;uc003mkq.3;uc003mkr.3;uc003mks.3;uc003mko.3;uc003mky.2;uc011dgt.1;uc011dgu.1;uc003mla.3;uc003mlb.3;uc003mlc.3;uc011dgr.2;uc011dgs.2;uc003mkt.1;uc003mkw.4;uc003mkx.3;uc003mkm.3;uc003mkn.1	100302156;11282;11282;11282;11282;4056;51149;51149;51149;51149;51149;51149;8878;8878;8878;8878;8878;9794;9794	-7005;-3884;-3382;-2476;0;11365;53241;53241;53241;53241;53241;53241;0;0;-1725;-15243;-16886;0;0
chr5	179233751	179234099	349	*	Promoter (<=1kb)	5	179224598	179233952	9355	2	11282	uc003mks.3	0	ENSG00000161013	MGAT4B	alpha-1,3-mannosyl-glycoprotein 4-beta-N-acetylglucosaminyltransferase B	uc021yjg.1;uc003mkp.3;uc003mkq.3;uc003mkr.3;uc003mks.3;uc003mko.3;uc003mky.2;uc011dgt.1;uc011dgu.1;uc003mla.3;uc003mlb.3;uc003mlc.3;uc011dgr.2;uc011dgs.2;uc003mkt.1;uc003mkw.4;uc003mkx.3;uc003mkm.3;uc003mkn.1	100302156;11282;11282;11282;11282;4056;51149;51149;51149;51149;51149;51149;8878;8878;8878;8878;8878;9794;9794	-8405;-5284;-4782;-3876;0;12765;51741;51741;51741;51741;51741;51741;0;0;-225;-13743;-15386;0;0
chr5	180534551	180535099	549	*	Distal Intergenic	5	180551357	180552304	948	2	26693	uc031smg.1	17205	ENSG00000185372	OR2V1	olfactory receptor family 2 subfamily V member 1	uc003mmt.3;uc031smg.1;uc011dhj.2	153579;26693;285659	67326;17205;-46844
chr5	180618601	180618749	149	*	Exon (uc021ykb.1/uc021ykb.1, exon 1 of 1)	5	180620924	180627930	7007	2	81786	uc003mmv.1	9181	ENSG00000146054	TRIM7	tripartite motif containing 7	uc021ykh.1;uc003mni.1;uc003mnj.1;uc011dhk.1;uc010jls.3;uc011dhl.2;uc011dhj.2;uc003mmv.1;uc003mmw.1;uc003mmx.1;uc003mmy.1;uc003mmz.1;uc003mna.2;uc003mnc.2;uc003mnd.2;uc003mne.2;uc003mnf.2;uc010jlq.1;uc003mng.1	100616342;10399;10399;10399;10399;10399;285659;81786;81786;81786;81786;81786;81786;90933;90933;90933;90933;90933;90933	30884;52157;52157;52157;52155;52157;36658;9181;12591;12591;12591;13428;13428;0;0;0;0;-38995;-41642
chr5	180648901	180649199	299	*	Promoter (<=1kb)	5	180649566	180649633	68	2	100616342	uc021ykh.1	434	ENSG00000264732	MIR4638	microRNA 4638	uc031smh.1;uc031smi.1;uc031smj.1;uc003mnq.4;uc021ykh.1;uc003mni.1;uc003mnj.1;uc011dhk.1;uc010jls.3;uc011dhl.2;uc003mnn.1;uc010jlt.1;uc003mmv.1;uc003mmw.1;uc003mmx.1;uc003mmy.1;uc003mmz.1;uc003mna.2;uc003mnp.3;uc003mnc.2;uc003mnd.2;uc003mne.2;uc003mnf.2;uc010jlq.1;uc003mng.1	100507602;100507602;100507602;100507602;100616342;10399;10399;10399;10399;10399;619570;619571;81786;81786;81786;81786;81786;81786;84851;90933;90933;90933;90933;90933;90933	-39014;-39014;-39014;-39014;434;21707;21707;21707;21705;21707;21177;19690;-20971;-17561;-17561;-17561;-16724;-16724;38920;0;0;0;0;-8545;-11192
chr5	180650501	180650849	349	*	Promoter (<=1kb)	5	180650263	180662808	12546	1	90933	uc003mnf.2	238	ENSG00000146063	TRIM41	tripartite motif containing 41	uc031smh.1;uc031smi.1;uc031smj.1;uc003mnq.4;uc021ykh.1;uc003mni.1;uc003mnj.1;uc011dhk.1;uc010jls.3;uc011dhl.2;uc003mnn.1;uc010jlt.1;uc003mmv.1;uc003mmw.1;uc003mmx.1;uc003mmy.1;uc003mmz.1;uc003mna.2;uc003mnp.3;uc003mnc.2;uc003mnd.2;uc003mne.2;uc003mnf.2;uc010jlq.1;uc003mng.1	100507602;100507602;100507602;100507602;100616342;10399;10399;10399;10399;10399;619570;619571;81786;81786;81786;81786;81786;81786;84851;90933;90933;90933;90933;90933;90933	-37364;-37364;-37364;-37364;-868;20057;20057;20057;20055;20057;19527;18040;-22571;-19161;-19161;-19161;-18324;-18324;37270;0;0;0;0;-6895;-9542
chr5	180900701	180900899	199	*	Distal Intergenic	5	180794288	180795226	939	1	81399	uc011dhm.2	106413	ENSG00000284662	OR4F16	olfactory receptor family 4 subfamily F member 16	NA	NA	NA
chr5	180901001	180901499	499	*	Distal Intergenic	5	180794288	180795226	939	1	81399	uc011dhm.2	106713	ENSG00000284662	OR4F16	olfactory receptor family 4 subfamily F member 16	NA	NA	NA
chr6	335351	335699	349	*	Intron (uc011dhn.1/56940, intron 4 of 6)	6	304628	351353	46726	1	56940	uc003msy.1	30723	ENSG00000112679	DUSP22	dual specificity phosphatase 22	uc011dhn.1;uc003msx.3;uc003msy.1	56940;56940;56940	0;0;0
chr6	2543001	2543399	399	*	Distal Intergenic	6	2622972	2635298	12327	2	154386	uc003mtw.2	91899	ENSG00000164385	LINC01600	long intergenic non-protein coding RNA 1600	NA	NA	NA
chr6	2989751	2990299	549	*	Promoter (<=1kb)	6	2988882	2991405	2524	1	401232	uc003mur.5	869	ENSG00000244041	LINC01011	long intergenic non-protein coding RNA 1011	uc011dhq.2;uc003mur.5;uc031smp.1;uc003mup.1;uc003mus.2;uc003mut.2;uc003muj.3;uc003muk.3;uc003mul.4;uc031smn.1;uc031smo.1;uc003mum.4;uc003mun.4;uc003muo.3	401232;401232;401233;4835;4835;4835;5269;5269;5269;5269;5269;5269;5269;5269	0;0;0;0;-9768;-9768;-31348;-28190;-27347;-18469;-18208;-17352;-17352;-17352
chr6	3024251	3024399	149	*	Promoter (<=1kb)	6	3020390	3025005	4616	2	401233	uc031smp.1	606	NA	HTATSF1P2	HIV-1 Tat specific factor 1 pseudogene 2	uc011dhq.2;uc003mur.5;uc031smp.1;uc003mup.1;uc003mus.2;uc003mut.2;uc003muv.4;uc010jni.3	401232;401232;401233;4835;4835;4835;8737;8737	0;0;0;0;24184;24184;-39723;-39723
chr6	3157651	3158099	449	*	Promoter (<=1kb)	6	3153902	3157783	3882	2	7280	uc003mvc.3	0	ENSG00000137267	TUBB2A	tubulin beta 2A class IIa	uc003mve.3;uc003mvf.3;uc003muy.3;uc003muz.3;uc003mva.3;uc011dht.2;uc003mvb.3;uc003mvc.3;uc003muv.4;uc010jni.3;uc003mux.3;uc011dhs.2	100507194;100507194;670;670;670;670;7280;7280;8737;8737;8737;8737	37902;37902;38725;38725;38725;38725;-1169;0;93529;93529;80653;80653
chr6	3160551	3160799	249	*	Distal Intergenic	6	3153902	3157783	3882	2	7280	uc003mvc.3	-2768	ENSG00000137267	TUBB2A	tubulin beta 2A class IIa	uc003mve.3;uc003mvf.3;uc003muy.3;uc003muz.3;uc003mva.3;uc011dht.2;uc003mvb.3;uc003mvc.3;uc003muv.4;uc010jni.3;uc003mux.3;uc011dhs.2	100507194;100507194;670;670;670;670;7280;7280;8737;8737;8737;8737	35202;35202;41625;41625;41625;41625;-4069;0;96429;96429;83553;83553
chr6	3210001	3210199	199	*	Distal Intergenic	6	3183052	3196001	12950	2	100507194	uc003mvf.3	-14000	ENSG00000230269	LINC02525	long intergenic non-protein coding RNA 2525	uc003mve.3;uc003mvf.3;uc003mvg.3;uc003mvj.4;uc010jnl.1;uc010jnm.1	100507194;100507194;347733;389362;389362;389362	-14000;-14000;17769;-48963;-48963;-48963
chr6	3288601	3288849	249	*	5' UTR	6	3259162	3268300	9139	1	389362	uc010jnm.1	29439	ENSG00000180822	PSMG4	proteasome assembly chaperone 4	uc003mvj.4;uc010jnl.1;uc010jnm.1;uc003mvn.3;uc003mvo.3;uc003mvm.3;uc003mvp.1;uc010jnn.3;uc010jno.2	389362;389362;389362;63027;63027;63027;63027;63027;63027	29439;29439;29439;0;0;0;0;0;0
chr6	3418901	3419199	299	*	Intron (uc003mvn.3/63027, intron 2 of 10)	6	3269207	3445218	176012	2	63027	uc003mvn.3	26019	ENSG00000137266	SLC22A23	solute carrier family 22 member 23	uc003mvn.3;uc003mvo.3;uc003mvm.3;uc003mvp.1;uc010jnn.3;uc010jno.2	63027;63027;63027;63027;63027;63027	0;0;0;0;0;0
chr6	4018201	4018749	549	*	Distal Intergenic	6	4021569	4065217	43649	1	8899	uc003mvv.3	-2820	ENSG00000112739	PRP4K	pre-mRNA processing factor kinase PRP4K	uc010jnq.1;uc003mvx.3;uc003mvy.3;uc003mvv.3;uc011dhv.1;uc003mvw.3	222826;222826;222826;8899;8899;8899	68829;60708;68829;-2820;-3178;-18882
chr6	4018851	4019149	299	*	Distal Intergenic	6	4021569	4065217	43649	1	8899	uc003mvv.3	-2420	ENSG00000112739	PRP4K	pre-mRNA processing factor kinase PRP4K	uc010jnq.1;uc003mvx.3;uc003mvy.3;uc003mvv.3;uc011dhv.1;uc003mvw.3	222826;222826;222826;8899;8899;8899	68429;60308;68429;-2420;-2778;-18482
chr6	4135251	4136449	1199	*	Promoter (<=1kb)	6	4115927	4135702	19776	2	10455	uc021yku.1	0	ENSG00000198721	ECI2	enoyl-CoA delta isomerase 2	uc021yku.1;uc003mwc.3;uc003mwd.3;uc003mwe.3;uc003mwf.3;uc010jnr.1;uc010jnq.1;uc003mvy.3;uc003mvz.4;uc003mwa.4;uc011dhw.1;uc003mwb.4	10455;10455;10455;10455;10455;10455;222826;222826;404220;404220;404220;404220	0;0;0;0;0;-1316;-47673;-47673;55811;55811;47668;47668
chr6	4183851	4184349	499	*	Distal Intergenic	6	4115927	4135831	19905	2	10455	uc003mwf.3	-48020	ENSG00000198721	ECI2	enoyl-CoA delta isomerase 2	uc021yku.1;uc003mwc.3;uc003mwd.3;uc003mwe.3;uc003mwf.3;uc010jnr.1	10455;10455;10455;10455;10455;10455	0;0;0;0;0;-49916
chr6	4620801	4621199	399	*	Distal Intergenic	6	4706393	4955778	249386	1	9425	uc003mwi.3	-85194	ENSG00000153046	CDYL	chromodomain Y like	NA	NA	NA
chr6	4728351	4728499	149	*	Intron (uc003mwi.3/9425, intron 2 of 8)	6	4706393	4955778	249386	1	9425	uc003mwi.3	21958	ENSG00000153046	CDYL	chromodomain Y like	uc003mwi.3;uc003mwj.3;uc003mwk.3	9425;9425;9425	0;-48181;-48181
chr6	4775801	4776049	249	*	Promoter (<=1kb)	6	4776680	4955778	179099	1	9425	uc003mwj.3	-631	ENSG00000153046	CDYL	chromodomain Y like	uc003mwi.3;uc003mwj.3;uc003mwk.3	9425;9425;9425	0;-631;-631
chr6	5096851	5097099	249	*	Intron (uc003mwn.1/uc003mwn.1, intron 3 of 3)	6	5085720	5087455	1736	1	648791	uc011dia.1	11131	ENSG00000219607	PPP1R3G	protein phosphatase 1 regulatory subunit 3G	uc003mwp.3;uc003mwq.3;uc010jnu.3;uc011dia.1	57128;57128;57128;648791	0;0;0;11131
chr6	5261101	5261449	349	*	Promoter (<=1kb)	6	5261277	5771816	510540	1	10667	uc010jnv.1	0	ENSG00000145982	FARS2	phenylalanyl-tRNA synthetase 2, mitochondrial	uc010jnv.1;uc003mwr.2;uc003mwp.3;uc003mwq.3;uc010jnu.3;uc021ykw.1	10667;10667;57128;57128;57128;57128	0;-135;0;0;0;0
chr6	6684601	6685049	449	*	Distal Intergenic	6	6649848	6655216	5369	1	9450	uc003mwz.1	34753	ENSG00000112799	LY86	lymphocyte antigen 86	uc003mwy.1;uc003mwz.1	9450;9450	95667;34753
chr6	6702151	6702599	449	*	Distal Intergenic	6	6649848	6655216	5369	1	9450	uc003mwz.1	52303	ENSG00000112799	LY86	lymphocyte antigen 86	uc003mwy.1;uc003mwz.1	9450;9450	113217;52303
chr6	6704601	6705049	449	*	Distal Intergenic	6	6649848	6655216	5369	1	9450	uc003mwz.1	54753	ENSG00000112799	LY86	lymphocyte antigen 86	uc003mwy.1;uc003mwz.1	9450;9450	115667;54753
chr6	6885851	6886299	449	*	Distal Intergenic	6	7107830	7252213	144384	1	6239	uc021yky.1	-221531	ENSG00000124782	RREB1	ras responsive element binding protein 1	NA	NA	NA
chr6	7143651	7143999	349	*	Intron (uc021yky.1/6239, intron 1 of 11)	6	7108865	7219324	110460	1	6239	uc003mxd.3	34786	ENSG00000124782	RREB1	ras responsive element binding protein 1	uc021yky.1;uc010jnw.3;uc003mxb.3;uc003mxc.3;uc010jnx.3;uc003mxd.3;uc021ykz.1;uc021yla.1	6239;6239;6239;6239;6239;6239;6239;6239	0;0;0;0;0;0;-38104;-38104
chr6	7675651	7675849	199	*	Distal Intergenic	6	7727011	7881961	154951	1	654	uc003mxu.4	-51162	ENSG00000153162	BMP6	bone morphogenetic protein 6	NA	NA	NA
chr6	7975351	7975899	549	*	Intron (uc003mxw.3/100526836, intron 4 of 12)	6	7986335	7990577	4243	1	206426	uc003mxx.4	-10436	NA	PIP5K1P1	phosphatidylinositol-4-phosphate 5-kinase type 1 pseudogene 1	uc003mxw.3;uc021ylg.1;uc003mxx.4;uc003mxy.3;uc010job.3;uc010joc.3;uc021ylf.1	100526836;100526837;206426;63915;63915;63915;63915	0;126929;-10436;88748;88748;88748;88748
chr6	10722901	10723849	949	*	Promoter (<=1kb)	6	10723148	10729556	6409	1	51522	uc010joq.2	0	ENSG00000111843	TMEM14C	transmembrane protein 14C	uc011dim.1;uc003mzf.4;uc011dij.2;uc011dik.2;uc011dil.2;uc010jot.3;uc010jou.3;uc003mzm.3;uc021ylk.1;uc021yll.1;uc010joq.2;uc003mzh.3;uc021ylj.1;uc003mzg.3;uc003mzk.4;uc010jor.3;uc010jos.1	221711;347744;347744;347744;347744;4117;4117;4117;4117;4117;51522;51522;51522;55003;81853;81853;81853	0;-28062;-28062;-28062;-27871;0;0;0;0;0;0;0;0;27713;-24146;-24146;0
chr6	10725001	10725999	999	*	Promoter (1-2kb)	6	10723148	10731362	8215	1	51522	uc021ylj.1	1853	ENSG00000111843	TMEM14C	transmembrane protein 14C	uc011dim.1;uc003mzf.4;uc011dij.2;uc011dik.2;uc011dil.2;uc010jot.3;uc010jou.3;uc003mzm.3;uc021ylk.1;uc021yll.1;uc010joq.2;uc003mzh.3;uc021ylj.1;uc003mzg.3;uc003mzk.4;uc010jor.3;uc010jos.1	221711;347744;347744;347744;347744;4117;4117;4117;4117;4117;51522;51522;51522;55003;81853;81853;81853	0;-30162;-30162;-30162;-29971;0;0;0;0;0;0;0;0;29813;-21996;-21996;0
chr6	10727051	10727299	249	*	Intron (uc010joq.2/51522, intron 4 of 4)	6	10723148	10731362	8215	1	51522	uc021ylj.1	3903	ENSG00000111843	TMEM14C	transmembrane protein 14C	uc011dim.1;uc003mzf.4;uc011dij.2;uc011dik.2;uc011dil.2;uc010jot.3;uc010jou.3;uc003mzm.3;uc021ylk.1;uc021yll.1;uc010joq.2;uc003mzh.3;uc021ylj.1;uc003mzg.3;uc003mzk.4;uc010jor.3;uc010jos.1	221711;347744;347744;347744;347744;4117;4117;4117;4117;4117;51522;51522;51522;55003;81853;81853;81853	0;-32212;-32212;-32212;-32021;0;0;0;0;0;0;0;0;31863;-20696;-20696;0
chr6	10771751	10772049	299	*	Intron (uc010jos.1/81853, intron 4 of 4)	6	10747995	10852986	104992	1	81853	uc010jos.1	23756	ENSG00000137210	TMEM14B	transmembrane protein 14B	uc011dim.1;uc010jot.3;uc010jou.3;uc003mzm.3;uc021ylk.1;uc021yll.1;uc010jov.2;uc021ylm.1;uc010joq.2;uc003mzh.3;uc021ylj.1;uc003mzk.4;uc010jor.3;uc010jos.1	221711;4117;4117;4117;4117;4117;4117;4117;51522;51522;51522;81853;81853;81853	0;0;0;0;0;0;66739;59061;0;0;0;23756;23756;0
chr6	10934601	10934849	249	*	Intron (uc003mzo.3/221711, intron 20 of 29)	6	10898244	10974541	76298	1	221711	uc010jow.3	36357	ENSG00000153157	SYCP2L	synaptonemal complex protein 2 like	uc011dim.1;uc003mzo.3;uc011din.1;uc010jow.3;uc003mzp.4	221711;221711;221711;221711;54898	0;0;36357;0;109775
chr6	12011401	12012249	849	*	Promoter (<=1kb)	6	12012724	12165232	152509	1	3096	uc003nac.3	-475	ENSG00000095951	HIVEP1	HIVEP zinc finger 1	uc003nac.3	3096	-475
chr6	13274101	13274449	349	*	3' UTR	6	13279527	13295818	16292	2	100130357	uc003nak.1	21369	ENSG00000215022	LOC100130357	uncharacterized LOC100130357	uc003nak.1;uc011dir.2;uc003nah.2;uc010jpc.3;uc003nag.2;uc003naj.3;uc011dis.2;uc003nal.3;uc003nam.3;uc003nan.3;uc003nao.3;uc010jpd.4;uc003naq.3	100130357;221692;221692;221692;221692;51256;51256;51256;51256;51256;51256;51256;51256	21369;557064;0;0;0;0;54338;54338;54338;54338;54338;54338;54338
chr6	13335151	13335449	299	*	Distal Intergenic	6	13318946	13328787	9842	2	51256	uc003naq.3	-6364	ENSG00000145979	TBC1D7	TBC1 domain family member 7	uc003nak.1;uc003nah.2;uc010jpc.3;uc003naj.3;uc011dis.2;uc003nal.3;uc003nam.3;uc003nan.3;uc003nao.3;uc010jpd.4;uc003naq.3;uc021ylt.1;uc003nas.2;uc003nat.2	100130357;221692;221692;51256;51256;51256;51256;51256;51256;51256;51256;54438;54438;54438	-39333;0;0;0;-6364;-6364;-6364;-6364;-6364;-6364;-6364;0;0;0
chr6	13407951	13408299	349	*	Promoter (<=1kb)	6	13363587	13408369	44783	2	54438	uc021ylt.1	70	ENSG00000145990	GFOD1	Gfo/Idh/MocA-like oxidoreductase domain containing 1	uc021ylt.1;uc003nas.2;uc003nat.2	54438;54438;54438	0;0;0
chr6	13678551	13678849	299	*	Intron (uc003nba.3/10048, intron 1 of 11)	6	13621730	13697128	75399	2	10048	uc003nba.3	18279	ENSG00000010017	RANBP9	RAN binding protein 9	uc003nba.3;uc003nbb.3	10048;10048	0;0
chr6	14477051	14477349	299	*	Distal Intergenic	6	14117865	14137148	19284	1	9308	uc003nbi.3	359186	ENSG00000112149	CD83	CD83 molecule	NA	NA	NA
chr6	15036951	15037349	399	*	Distal Intergenic	6	15245734	15497401	251668	1	3720	uc011diu.1	-208385	ENSG00000008083	JARID2	jumonji and AT-rich interaction domain containing 2	NA	NA	NA
chr6	15079651	15080049	399	*	Distal Intergenic	6	15245734	15497401	251668	1	3720	uc011diu.1	-165685	ENSG00000008083	JARID2	jumonji and AT-rich interaction domain containing 2	NA	NA	NA
chr6	15107251	15107799	549	*	Distal Intergenic	6	15245734	15497401	251668	1	3720	uc011diu.1	-137935	ENSG00000008083	JARID2	jumonji and AT-rich interaction domain containing 2	NA	NA	NA
chr6	15400201	15400499	299	*	Promoter (<=1kb)	6	15401089	15509585	108497	1	3720	uc011diw.1	-590	ENSG00000008083	JARID2	jumonji and AT-rich interaction domain containing 2	uc011diu.1;uc003nbj.4;uc011div.3;uc011diw.1	3720;3720;3720;3720	0;0;0;-590
chr6	15906101	15906449	349	*	Distal Intergenic	6	16129317	16148478	19162	1	29116	uc003nbq.3	-222868	ENSG00000007944	MYLIP	myosin regulatory light chain interacting protein	NA	NA	NA
chr6	15915801	15915949	149	*	Distal Intergenic	6	16129317	16148478	19162	1	29116	uc003nbq.3	-213368	ENSG00000007944	MYLIP	myosin regulatory light chain interacting protein	NA	NA	NA
chr6	16031351	16031849	499	*	Distal Intergenic	6	16129317	16148478	19162	1	29116	uc003nbq.3	-97468	ENSG00000007944	MYLIP	myosin regulatory light chain interacting protein	NA	NA	NA
chr6	16129201	16129599	399	*	Promoter (<=1kb)	6	16129317	16148478	19162	1	29116	uc003nbq.3	0	ENSG00000007944	MYLIP	myosin regulatory light chain interacting protein	uc021ymb.2;uc003nbq.3;uc003nbr.3	100616269;29116;29116	-12188;0;0
chr6	16131151	16131599	449	*	Promoter (1-2kb)	6	16129317	16148478	19162	1	29116	uc003nbr.3	1834	ENSG00000007944	MYLIP	myosin regulatory light chain interacting protein	uc021ymb.2;uc003nbq.3;uc003nbr.3	100616269;29116;29116	-10188;0;0
chr6	16237001	16237199	199	*	Promoter (1-2kb)	6	16238811	16295780	56970	1	2766	uc003nbs.3	-1612	ENSG00000137198	GMPR	guanosine monophosphate reductase	uc003nbs.3	2766	0
chr6	16238351	16238899	549	*	Promoter (<=1kb)	6	16238811	16295780	56970	1	2766	uc003nbs.3	0	ENSG00000137198	GMPR	guanosine monophosphate reductase	uc003nbs.3	2766	0
chr6	16267801	16268199	399	*	Intron (uc003nbs.3/2766, intron 4 of 8)	6	16238811	16295780	56970	1	2766	uc003nbs.3	28990	ENSG00000137198	GMPR	guanosine monophosphate reductase	uc003nbs.3;uc003nbt.3;uc010jpi.3;uc010jpj.1	2766;6310;6310;6310	0;0;0;0
chr6	16270501	16270899	399	*	Intron (uc003nbs.3/2766, intron 4 of 8)	6	16238811	16295780	56970	1	2766	uc003nbs.3	31690	ENSG00000137198	GMPR	guanosine monophosphate reductase	uc003nbs.3;uc003nbt.3;uc010jpi.3;uc010jpj.1	2766;6310;6310;6310	0;0;0;0
chr6	16333951	16334299	349	*	Intron (uc003nbt.3/6310, intron 7 of 8)	6	16238811	16295780	56970	1	2766	uc003nbs.3	95140	ENSG00000137198	GMPR	guanosine monophosphate reductase	uc003nbs.3;uc003nbt.3;uc010jpi.3;uc010jpj.1	2766;6310;6310;6310	0;0;0;0
chr6	17662901	17663199	299	*	Intron (uc003ncd.2/9972, intron 9 of 21)	6	17615266	17707065	91800	2	9972	uc003ncd.2	43866	ENSG00000124789	NUP153	nucleoporin 153	uc003ncd.2;uc010jpl.2;uc011dje.2	9972;9972;9972	0;0;0
chr6	17706751	17707149	399	*	Promoter (<=1kb)	6	17615266	17707065	91800	2	9972	uc003ncd.2	0	ENSG00000124789	NUP153	nucleoporin 153	uc003ncd.2;uc010jpl.2;uc011dje.2	9972;9972;9972	0;0;0
chr6	17962601	17963049	449	*	Intron (uc003ncf.3/63971, intron 2 of 37)	6	17759414	17987854	228441	2	63971	uc003ncf.3	24805	ENSG00000137177	KIF13A	kinesin family member 13A	uc003ncf.3;uc003ncg.4;uc003nch.4;uc003nci.4;uc003nck.3	63971;63971;63971;63971;63971	0;0;0;0;0
chr6	19968301	19968849	549	*	Distal Intergenic	6	19837601	19842431	4831	1	3400	uc003ncw.4	130700	ENSG00000172201	ID4	inhibitor of DNA binding 4	NA	NA	NA
chr6	20403101	20403999	899	*	Promoter (<=1kb)	6	20403910	20493945	90036	1	1871	uc021ymj.2	0	ENSG00000112242	E2F3	E2F transcription factor 3	uc003ncz.2;uc003nda.2;uc021ymj.2	1871;1871;1871	0;0;0
chr6	20608751	20608949	199	*	Intron (uc003ndd.2/54901, intron 4 of 15)	6	20546570	21232634	686065	1	54901	uc021ymk.1	62181	ENSG00000145996	CDKAL1	CDK5 regulatory subunit associated protein 1 like 1	uc003ndb.1;uc010jpo.1;uc003ndd.2;uc003nde.2;uc021ymk.1	54901;54901;54901;54901;54901	74063;74063;0;0;0
chr6	24414801	24415099	299	*	Intron (uc003nea.3/57380, intron 5 of 9)	6	24403153	24425816	22664	1	57380	uc011djn.2	11648	ENSG00000124532	MRS2	magnesium transporter MRS2	uc003ned.2;uc010jpr.1;uc010jps.1;uc003ndy.3;uc003nea.3;uc003neb.3;uc011djl.2;uc011djm.2;uc011djn.2	2822;2822;2822;51473;57380;57380;57380;57380;57380	0;0;0;-31281;0;0;0;0;0
chr6	24451901	24452249	349	*	Intron (uc003ned.2/2822, intron 14 of 24)	6	24447759	24476506	28748	2	2822	uc010jpr.1	24257	ENSG00000112293	GPLD1	glycosylphosphatidylinositol specific phospholipase D1	uc003ned.2;uc010jpr.1;uc010jps.1;uc003nee.4;uc003nea.3;uc003neb.3;uc011djl.2;uc011djm.2;uc011djn.2;uc003nef.3;uc003neg.3	2822;2822;2822;2822;57380;57380;57380;57380;57380;7915;7915	0;0;0;37601;0;0;0;0;0;-42948;-42948
chr6	24720251	24721799	1549	*	Promoter (<=1kb)	6	24705090	24719403	14314	2	81688	uc003nel.3	-848	ENSG00000112308	C6orf62	chromosome 6 open reading frame 62	uc003nek.3;uc010jpv.3;uc003nel.3	55856;55856;81688	52988;52988;-848
chr6	26027201	26027599	399	*	Promoter (<=1kb)	6	26027124	26027480	357	2	8366	uc003nfr.3	0	ENSG00000278705	H4C2	H4 clustered histone 2	uc003nfm.4;uc010jqd.4;uc003nfw.3;uc003nfu.3;uc003nfo.3;uc003nft.1;uc003nfp.1;uc003nfv.3;uc003nfs.1;uc003nfq.3;uc003nfr.3	10475;10475;3006;3018;3024;8335;8350;8352;8358;8359;8366	64284;53800;29100;16286;-9161;6197;6483;-18040;4689;5294;0
chr6	26124201	26124849	649	*	Promoter (<=1kb)	6	26124373	26124918	546	1	8334	uc003ngm.3	0	ENSG00000180573	H2AC6	H2A clustered histone 6	uc003ngq.3;uc003ngj.3;uc003ngr.3;uc003ngs.3;uc003nfx.1;uc003nfy.1;uc003nfz.1;uc003nga.1;uc003ngb.1;uc003ngc.1;uc003ngd.1;uc003nge.1;uc003ngf.1;uc010jqe.1;uc003ngm.3;uc003ngl.3;uc003ngi.3	3008;3010;3017;3017;3077;3077;3077;3077;3077;3077;3077;3077;3077;3077;8334;8347;8364	-31710;-15837;-33500;-33500;36692;36692;36692;36692;36692;36692;36692;36692;36692;36692;0;-69;20025
chr6	26188651	26188949	299	*	Promoter (<=1kb)	6	26188938	26189304	367	2	8360	uc003ngu.3	355	ENSG00000277157	H4C4	H4 clustered histone 4	uc003nhd.3;uc003ngq.3;uc003nha.1;uc003ngw.4;uc003ngr.3;uc003ngs.3;uc003ngz.2;uc003ngx.3;uc003ngt.3;uc003ngv.4;uc003nhc.4;uc003ngu.3;uc003ngy.3	3007;3008;3012;3013;3017;3017;8339;8343;8344;8351;8353;8360;8367	0;32092;0;0;30302;30302;27923;0;4627;0;-36434;0;-15924
chr6	26189051	26189399	349	*	Promoter (<=1kb)	6	26188938	26189304	367	2	8360	uc003ngu.3	0	ENSG00000277157	H4C4	H4 clustered histone 4	uc003nhd.3;uc003ngq.3;uc003nha.1;uc003ngw.4;uc003ngr.3;uc003ngs.3;uc003ngz.2;uc003ngx.3;uc003ngt.3;uc003ngv.4;uc003nhc.4;uc003ngu.3;uc003ngy.3	3007;3008;3012;3013;3017;3017;8339;8343;8344;8351;8353;8360;8367	0;32492;0;0;30702;30702;27473;0;5027;0;-35984;0;-15474
chr6	26197451	26197699	249	*	Promoter (1-2kb)	6	26199012	26199521	510	2	3013	uc003ngw.4	1822	ENSG00000196866	H2AC7	H2A clustered histone 7	uc003nhd.3;uc003ngq.3;uc003nha.1;uc003ngw.4;uc003ngr.3;uc003ngs.3;uc003ngz.2;uc003ngx.3;uc003ngt.3;uc003ngv.4;uc003nhc.4;uc003ngu.3;uc003nhe.1;uc003ngy.3;uc003nhf.3	3007;3008;3012;3013;3017;3017;8339;8343;8344;8351;8353;8360;8361;8367;8369	0;40892;0;0;39102;39102;19173;0;13427;0;-27684;0;-42955;-7174;49506
chr6	26198951	26200049	1099	*	Promoter (<=1kb)	6	26199012	26199521	510	2	3013	uc003ngw.4	0	ENSG00000196866	H2AC7	H2A clustered histone 7	uc003nhd.3;uc003ngq.3;uc003nha.1;uc003ngw.4;uc003ngr.3;uc003ngs.3;uc003ngz.2;uc003ngx.3;uc003ngt.3;uc003ngv.4;uc003nhc.4;uc003ngu.3;uc003nhe.1;uc003ngy.3;uc003nhf.3	3007;3008;3012;3013;3017;3017;8339;8343;8344;8351;8353;8360;8361;8367;8369	0;42392;0;0;40602;40602;16823;0;14927;0;-25334;0;-40605;-4824;47156
chr6	26216951	26217749	799	*	Promoter (<=1kb)	6	26217148	26217711	564	1	3012	uc003nha.1	0	ENSG00000277075	H2AC8	H2A clustered histone 8	uc003nhd.3;uc003nha.1;uc003ngw.4;uc003ngs.3;uc003ngz.2;uc003ngx.3;uc003ngt.3;uc003nhh.3;uc003ngv.4;uc003nhc.4;uc003ngu.3;uc003nhe.1;uc003ngy.3;uc003nhf.3;uc003nhg.1	3007;3012;3013;3017;8339;8343;8344;8345;8351;8353;8360;8361;8367;8369;8968	0;0;0;58602;-79;0;32927;-34130;0;-7634;0;-22905;12078;29456;33086
chr6	26234851	26235199	349	*	Promoter (<=1kb)	6	26234440	26235216	777	2	3007	uc003nhd.3	17	ENSG00000124575	H1-3	H1.3 linker histone, cluster member	uc003nhd.3;uc003nha.1;uc003ngw.4;uc003ngz.2;uc003ngx.3;uc003nhh.3;uc003nhk.3;uc003ngv.4;uc003nhc.4;uc003nhi.3;uc003ngu.3;uc003nhe.1;uc003ngy.3;uc003nhf.3;uc003nhg.1	3007;3012;3013;8339;8343;8345;8346;8351;8353;8355;8360;8361;8367;8369;8968	0;0;0;-17979;0;-16680;-38005;0;9468;0;0;-5455;29978;12006;15636
chr6	26271101	26271549	449	*	Promoter (<=1kb)	6	26271146	26271612	467	2	8355	uc003nhi.3	63	ENSG00000273983	H3C8	H3 clustered histone 8	uc003nhd.3;uc003nhh.3;uc003nhk.3;uc003nhc.4;uc003nhi.3;uc003nhe.1;uc003nhm.2;uc003nhf.3;uc003nhg.1	3007;8345;8346;8353;8355;8361;8365;8369;8968	0;19222;-1655;45718;0;30447;0;-23896;-20266
chr6	26285451	26286049	599	*	Promoter (<=1kb)	6	26285354	26285727	374	2	8365	uc003nhm.2	0	ENSG00000158406	H4C8	H4 clustered histone 8	uc003nhh.3;uc003nhk.3;uc003nhi.3;uc003nhe.1;uc003nhm.2;uc003nhf.3;uc003nhg.1	8345;8346;8355;8361;8365;8369;8968	33572;12247;0;44797;0;-38246;-34616
chr6	26296051	26296649	599	*	Distal Intergenic	6	26285354	26285727	374	2	8365	uc003nhm.2	-10324	ENSG00000158406	H4C8	H4 clustered histone 8	uc003nhh.3;uc003nhk.3;uc003nhi.3;uc003nhm.2;uc003nhf.3;uc003nhg.1	8345;8346;8355;8365;8369;8968	44172;22847;0;0;-48846;-45216
chr6	26332051	26332399	349	*	Distal Intergenic	6	26365398	26378540	13143	1	11118	uc010jqh.2	-32999	ENSG00000186470	BTN3A2	butyrophilin subfamily 3 member A2	uc010jqh.2;uc003nhp.3;uc011dkd.2;uc011dke.2;uc010jqi.2;uc003nhm.2	11118;11118;11118;11118;11118;8365	-32999;-32999;-32999;-32999;-36007;0
chr6	26520851	26521649	799	*	Promoter (<=1kb)	6	26521934	26527612	5679	1	493812	uc011dkp.3	-285	ENSG00000228223	HCG11	HLA complex group 11	uc003nig.3;uc021yni.1;uc003nie.2;uc011dkp.3;uc003nif.4	10473;11120;285819;493812;696	-16923;62698;-38114;-285;19393
chr6	26688551	26688799	249	*	Distal Intergenic	6	26634611	26659980	25370	2	79692	uc021ynz.1	-28571	ENSG00000181315	ZNF322	zinc finger protein 322	uc003nil.4;uc021ynx.1;uc021yny.1;uc021ynz.1	79692;79692;79692;79692	-28571;-28571;-28571;-28571
chr6	26710551	26710699	149	*	Distal Intergenic	6	26634611	26659980	25370	2	79692	uc021ynz.1	-50571	ENSG00000181315	ZNF322	zinc finger protein 322	NA	NA	NA
chr6	27099951	27101449	1499	*	Promoter (<=1kb)	6	27100817	27101314	498	1	8969	uc003niw.3	0	ENSG00000196787	H2AC11	H2A clustered histone 11	uc021yoz.1;uc003niy.1;uc003niz.4;uc003nix.2;uc003niw.3;uc003niv.3	100422934;8294;85235;85236;8969;8970	-13956;0;-13412;0;0;0
chr6	27106901	27107499	599	*	Promoter (<=1kb)	6	27107088	27107457	370	1	8294	uc003niy.1	0	ENSG00000276180	H4C9	H4 clustered histone 9	uc021yoz.1;uc003niy.1;uc003niz.4;uc003nix.2;uc003niw.3;uc003niv.3	100422934;8294;85235;85236;8969;8970	-7906;0;-7362;0;0;0
chr6	27470751	27470999	249	*	Exon (uc021yqa.1/uc021yqa.1, exon 1 of 1)	6	27418521	27440897	22377	2	7738	uc003nji.3	-29854	ENSG00000096654	ZNF184	zinc finger protein 184	uc003njj.3;uc010jqv.3;uc003nji.3	7738;7738;7738	-29867;-29857;-29854
chr6	27472951	27473299	349	*	Distal Intergenic	6	27418521	27440897	22377	2	7738	uc003nji.3	-32054	ENSG00000096654	ZNF184	zinc finger protein 184	uc003njj.3;uc010jqv.3;uc003nji.3	7738;7738;7738	-32067;-32057;-32054
chr6	27601001	27601349	349	*	Distal Intergenic	6	27661814	27678001	16188	1	100507173	uc021yrb.1	-60465	ENSG00000281706	LINC01012	long intergenic non-protein coding RNA 1012	NA	NA	NA
chr6	27798901	27799499	599	*	Promoter (<=1kb)	6	27798952	27799305	354	2	8362	uc003njr.3	0	ENSG00000273542	H4C12	H4 clustered histone 12	uc003njx.3;uc003njs.3;uc003njn.1;uc003njw.3;uc003njl.3;uc003njv.3;uc003njo.3;uc003njy.3;uc003njm.3;uc003njr.3;uc003njp.3;uc003njz.3	3009;8330;8331;8332;8340;8341;8342;8354;8357;8362;8363;8368	35860;6618;-16383;-33608;-23192;-6941;16079;40600;22924;0;6998;0
chr6	27841101	27841399	299	*	Promoter (<=1kb)	6	27840926	27841289	364	2	8368	uc003njz.3	0	ENSG00000275126	H4C13	H4 clustered histone 13	uc003njx.3;uc011dkw.2;uc003njs.3;uc003njw.3;uc003nkb.1;uc003njv.3;uc003nkc.1;uc003njy.3;uc003nka.3;uc003njr.3;uc003njp.3;uc003njz.3	3009;81697;8330;8332;8336;8341;8348;8354;8356;8362;8363;8368	-5742;38775;-34984;7994;0;34661;0;-1002;17171;0;49198;0
chr6	27860851	27861699	849	*	Promoter (<=1kb)	6	27860477	27860963	487	2	8336	uc003nkb.1	0	ENSG00000278677	H2AC17	H2A clustered histone 17	uc003njx.3;uc011dkw.2;uc003njw.3;uc003nkb.1;uc003nkc.1;uc003njy.3;uc003nka.3;uc003njz.3	3009;81697;8332;8336;8348;8354;8356;8368	-25492;18475;27744;0;0;-20752;-2281;0
chr6	27945451	27945699	249	*	Distal Intergenic	6	27925019	27925960	942	1	26212	uc011dkx.2	20432	ENSG00000124657	OR2B6	olfactory receptor family 2 subfamily B member 6	uc011dkx.2	26212	20432
chr6	28090001	28090349	349	*	3' UTR	6	28092387	28095331	2945	1	80345	uc011dky.1	-2038	ENSG00000196812	ZSCAN16	zinc finger and SCAN domain containing 16	uc010jqw.2;uc003nkk.2;uc003nkl.2;uc003nkj.5;uc021yrq.2;uc021yro.1;uc003nkh.3;uc003nki.4;uc003nkn.2;uc010jqx.2;uc010jqy.2;uc011dkz.2;uc011dky.1;uc003nkm.3	100129195;100129195;100129195;221584;651302;7718;7718;7718;7745;7745;7745;7745;80345;80345	0;0;0;31416;-39190;41519;41036;40978;0;0;0;0;-2038;-2038
chr6	28109801	28110049	249	*	Promoter (<=1kb)	6	28109989	28127250	17262	1	7745	uc011dkz.2	0	ENSG00000198315	ZKSCAN8	zinc finger with KRAB and SCAN domains 8	uc010jqw.2;uc003nkk.2;uc003nkl.2;uc003nkj.5;uc021yrq.2;uc003nkn.2;uc010jqx.2;uc010jqy.2;uc011dkz.2;uc011dky.1;uc003nkm.3	100129195;100129195;100129195;221584;651302;7745;7745;7745;7745;80345;80345	0;0;0;51216;-19490;0;0;0;0;17414;17414
chr6	28302851	28303249	399	*	Promoter (<=1kb)	6	28292515	28303911	11397	2	64288	uc003nla.3	662	ENSG00000235109	ZSCAN31	zinc finger and SCAN domain containing 31	uc003nla.3;uc003nlb.3;uc003nlc.3;uc010jrb.3;uc021yrs.1;uc021yrt.1;uc003nld.3;uc010jra.3;uc003nle.4;uc003nlf.4;uc010jrc.3;uc003nky.3;uc003nkz.3;uc010jre.3	64288;64288;64288;64288;64288;64288;64288;64288;80317;80317;80317;84547;84547;9753	0;0;0;0;0;0;0;0;-14442;-14442;-14442;53537;53537;64295
chr6	28457251	28457549	299	*	Distal Intergenic	6	28471073	28483570	12498	2	257202	uc010jrg.1	26021	ENSG00000198704	GPX6	glutathione peroxidase 6	uc003nlh.2;uc010jrf.1;uc003nli.4;uc010jrg.1;uc021yrx.1;uc003nll.2;uc003nlm.2;uc003nln.2	222696;222696;222696;257202;257202;2880;2880;2880	-45972;-45972;-45972;26021;26021;-36240;-36240;-38559
chr6	33928851	33928999	149	*	Distal Intergenic	6	33967749	33967828	80	2	100302123	uc021yyr.1	38829	ENSG00000221697	MIR1275	microRNA 1275	uc021yyr.1	100302123	38829
chr6	34359401	34359749	349	*	Promoter (<=1kb)	6	34254973	34360457	105485	2	11165	uc003ojl.3	708	ENSG00000272325	NUDT3	nudix hydrolase 3	uc021yyt.1;uc003ojl.3;uc003ojm.3;uc003ojn.3;uc021yyu.1	100529239;11165;6204;6204;6204	0;0;34069;34153;34153
chr6	34528351	34529049	699	*	Distal Intergenic	6	34505579	34524110	18532	2	25803	uc011dsq.2	-4241	ENSG00000124664	SPDEF	SAM pointed domain containing ETS transcription factor	uc003ojq.2;uc011dsq.2;uc003ojo.4;uc003ojp.4;uc003ojr.2;uc003ojs.2	25803;25803;29993;29993;64771;64771	-4241;-4241;94513;45702;135576;135576
chr6	34530501	34531199	699	*	Distal Intergenic	6	34505579	34524110	18532	2	25803	uc011dsq.2	-6391	ENSG00000124664	SPDEF	SAM pointed domain containing ETS transcription factor	uc003ojq.2;uc011dsq.2;uc003ojo.4;uc003ojp.4;uc003ojr.2;uc003ojs.2	25803;25803;29993;29993;64771;64771	-6391;-6391;96663;47852;133426;133426
chr6	34682401	34682649	249	*	Distal Intergenic	6	34555066	34664625	109560	2	64771	uc003ojs.2	-17776	ENSG00000196821	ILRUN	inflammation and lipid regulator with UBA-like and NBR1-like domains	uc003ojr.2;uc003ojs.2;uc003ojt.2;uc021yyv.1;uc021yyw.1	64771;64771;6631;6631;6631	-17776;-17776;-42222;-42222;-42967
chr6	34759501	34760349	849	*	Promoter (<=1kb)	6	34759794	34845291	85498	1	54887	uc003oju.4	0	ENSG00000065060	BLTP3A	bridge-like lipid transfer protein family member 3A	uc003oju.4;uc010jvm.2;uc010jvn.3;uc003ojt.2;uc021yyv.1;uc021yyw.1	54887;54887;54887;6631;6631;6631	0;0;0;34630;34630;33885
chr6	35137301	35137699	399	*	Distal Intergenic	6	35085849	35109187	23339	2	6954	uc011dsw.1	-28114	ENSG00000124678	TCP11	t-complex 11	uc003okf.1;uc003okg.1;uc003ojz.1;uc003oka.2;uc003okb.2;uc003okc.2;uc003okd.2;uc011dsu.2;uc011dsv.1;uc011dsw.1	222663;222663;6954;6954;6954;6954;6954;6954;6954;6954	-44491;-44491;-28682;-28114;-28114;-28114;-28114;-28114;-28114;-28114
chr6	35227301	35227749	449	*	Promoter (<=1kb)	6	35227510	35263760	36251	1	7629	uc003oki.1	0	ENSG00000065029	ZNF76	zinc finger protein 76	uc003okf.1;uc003okg.1;uc003okh.1;uc003okk.3;uc010jvs.3;uc010jvt.3;uc011dsx.2;uc011dsy.1;uc011dsz.1;uc003oki.1;uc003okj.1	222663;222663;222663;50619;50619;50619;7629;7629;7629;7629;7629	45111;45111;31944;-37846;-37846;-37846;0;0;0;0;0
chr6	35464851	35465149	299	*	Promoter (<=1kb)	6	35441374	35464861	23488	2	7005	uc003oku.4	0	ENSG00000007866	TEAD3	TEA domain transcription factor 3	uc003oko.1;uc010jvw.1;uc003okp.1;uc003oks.1;uc003okt.3;uc003oku.4;uc010jvx.3;uc003okv.4;uc003okw.4;uc021yyx.1;uc021yyy.1	2178;2178;4736;4736;7005;7005;7005;7287;7287;7287;7287	44713;44713;28673;28275;-15832;0;0;15498;15498;15498;15498
chr6	35693951	35694449	499	*	Promoter (1-2kb)	6	35541362	35696397	155036	2	2289	uc003oky.2	1948	ENSG00000096060	FKBP5	FKBP prolyl isomerase 5	uc003ola.3;uc003olb.1;uc011dte.1;uc003okx.2;uc011dtf.1;uc003oky.2;uc003okz.2;uc010jvy.2;uc003olc.1;uc010jvz.1	221481;221481;2289;2289;2289;2289;2289;285847;389383;389383	-10410;-10410;-37259;-37232;-37232;0;-37232;0;-49943;-49943
chr6	35695551	35696449	899	*	Promoter (<=1kb)	6	35541362	35696397	155036	2	2289	uc003oky.2	0	ENSG00000096060	FKBP5	FKBP prolyl isomerase 5	uc003ola.3;uc003olb.1;uc011dte.1;uc003okx.2;uc011dtf.1;uc003oky.2;uc003okz.2;uc010jvy.2;uc003olc.1;uc010jvz.1	221481;221481;2289;2289;2289;2289;2289;285847;389383;389383	-8410;-8410;-38859;-38832;-38832;0;-38832;0;-47943;-47943
chr6	35699301	35700099	799	*	Exon (uc010jvy.2/285847, exon 5 of 10)	6	35541362	35696397	155036	2	2289	uc003oky.2	-2904	ENSG00000096060	FKBP5	FKBP prolyl isomerase 5	uc003ola.3;uc003olb.1;uc011dte.1;uc003okx.2;uc011dtf.1;uc003oky.2;uc003okz.2;uc010jvy.2;uc003old.4;uc003olc.1;uc010jvz.1	221481;221481;2289;2289;2289;2289;2289;285847;340204;389383;389383	-4760;-4760;-42609;-42582;-42582;0;-42582;0;-48732;-44293;-44293
chr6	35888851	35889249	399	*	Promoter (<=1kb)	6	35800811	35888957	88147	2	6732	uc003olj.3	0	ENSG00000096063	SRPK1	SRSF protein kinase 1	uc010jwa.3;uc003olk.3;uc003oll.3;uc003olm.3;uc003oln.3;uc003olh.3;uc003oli.3;uc003olj.3;uc011dtg.2	116369;116369;116369;116369;116369;6732;6732;6732;6732	47482;48350;103028;103056;103164;-33;-9;0;0
chr6	35995201	35995749	549	*	Promoter (<=1kb)	6	35995454	36065831	70378	1	1432	uc011dth.2	0	ENSG00000112062	MAPK14	mitogen-activated protein kinase 14	uc003oll.3;uc003olm.3;uc003oln.3;uc011dth.2;uc003olo.3;uc003olp.3;uc003olq.3;uc003olr.3;uc011dti.2	116369;116369;116369;1432;1432;1432;1432;1432;1432	-2924;-2896;-2788;0;0;0;0;0;0
chr6	36086251	36086849	599	*	Distal Intergenic	6	36098261	36112301	14041	1	5603	uc003ols.4	-11412	ENSG00000156711	MAPK13	mitogen-activated protein kinase 13	uc011dth.2;uc003olo.3;uc003olp.3;uc003olq.3;uc003olr.3;uc011dti.2;uc003ols.4;uc003olt.4	1432;1432;1432;1432;1432;1432;5603;5603	0;0;0;0;0;0;-11412;-11412
chr6	36410551	36411299	749	*	Promoter (<=1kb)	6	36358329	36410666	52338	2	222659	uc003omd.2	0	ENSG00000179165	PXT1	peroxisomal testis enriched protein 1	uc003ome.3;uc010jwk.3;uc011dtm.2;uc011dtn.2;uc011dto.2;uc003omd.2	222658;222658;222658;222658;222658;222659	0;0;0;0;0;0
chr6	36544951	36545449	499	*	Distal Intergenic	6	36562090	36568658	6569	1	6428	uc011dtp.1	-16641	ENSG00000112081	SRSF3	serine and arginine rich splicing factor 3	uc021yza.1;uc003omg.3;uc003omh.3;uc003omi.3;uc011dtp.1;uc003omj.3;uc003omk.3	100500885;11329;11329;11329;6428;6428;6428	44840;-36384;-29704;-29704;-16641;-16641;-16641
chr6	36816401	36816699	299	*	Distal Intergenic	6	36708555	36807220	98666	2	57699	uc003omr.1	-9181	ENSG00000124772	CPNE5	copine 5	uc003omv.3;uc003omw.3;uc003omx.3;uc011dtr.2;uc003omu.2;uc003omr.1;uc003oms.1	221477;221477;221477;221477;51645;57699;57699	0;0;0;0;26101;-9181;-15706
chr6	36856801	36857099	299	*	Intron (uc003omv.3/221477, intron 3 of 9)	6	36853640	36896740	43101	1	221477	uc011dtr.2	3161	ENSG00000198663	C6orf89	chromosome 6 open reading frame 89	uc003omv.3;uc003omw.3;uc003omx.3;uc011dtr.2;uc003omu.2;uc003omr.1	221477;221477;221477;221477;51645;57699	0;0;0;0;-14001;-49581
chr6	36943601	36944149	549	*	Intron (uc003onc.2/23787, intron 6 of 11)	6	36935911	36954327	18417	2	23787	uc003onc.2	10178	ENSG00000137409	MTCH1	mitochondrial carrier 1	uc003onf.3;uc011dtu.1;uc003ong.2;uc010jwp.1;uc011dtv.1;uc003oni.1;uc003onj.1;uc021yzd.1;uc003omz.1;uc003ona.3;uc011dts.1;uc003omv.3;uc003omw.3;uc003omx.3;uc011dtr.2;uc003onc.2;uc003ond.2;uc010jwo.2;uc003one.5;uc011dtt.3	221472;221472;221472;221472;221472;221472;221472;221476;221476;221476;221476;221477;221477;221477;221477;23787;23787;23787;23787;23787	-29274;-29274;-29274;-29274;-29274;-36652;-45169;27562;21392;21392;14374;0;0;0;0;0;0;0;0;0
chr6	37018101	37018649	549	*	Distal Intergenic	6	36989318	36996391	7074	1	221472	uc003onj.1	28783	ENSG00000146192	FGD2	FYVE, RhoGEF and PH domain containing 2	uc003onf.3;uc011dtu.1;uc003ong.2;uc010jwp.1;uc011dtv.1;uc003oni.1;uc003onj.1	221472;221472;221472;221472;221472;221472;221472	44678;44678;44678;44678;44678;37300;28783
chr6	37039651	37039899	249	*	Distal Intergenic	6	36989318	36996391	7074	1	221472	uc003onj.1	50333	ENSG00000146192	FGD2	FYVE, RhoGEF and PH domain containing 2	uc003ong.2;uc010jwp.1;uc011dtv.1;uc003onj.1	221472;221472;221472;221472	66228;66228;66228;50333
chr6	37051351	37051649	299	*	Distal Intergenic	6	36989318	36996391	7074	1	221472	uc003onj.1	62033	ENSG00000146192	FGD2	FYVE, RhoGEF and PH domain containing 2	NA	NA	NA
chr6	37051801	37052049	249	*	Distal Intergenic	6	36989318	36996391	7074	1	221472	uc003onj.1	62483	ENSG00000146192	FGD2	FYVE, RhoGEF and PH domain containing 2	NA	NA	NA
chr6	37071051	37071449	399	*	Distal Intergenic	6	37137922	37143204	5283	1	5292	uc003onk.3	-66473	ENSG00000137193	PIM1	Pim-1 proto-oncogene, serine/threonine kinase	NA	NA	NA
chr6	37077551	37078549	999	*	Distal Intergenic	6	37137922	37143204	5283	1	5292	uc003onk.3	-59373	ENSG00000137193	PIM1	Pim-1 proto-oncogene, serine/threonine kinase	NA	NA	NA
chr6	37137501	37139049	1549	*	Promoter (<=1kb)	6	37137922	37143204	5283	1	5292	uc003onk.3	0	ENSG00000137193	PIM1	Pim-1 proto-oncogene, serine/threonine kinase	uc003onl.3;uc010jwr.3;uc010jws.3;uc003onm.4;uc003onk.3;uc011dtw.2	221468;221468;221468;221468;5292;5292	86364;86364;86364;86882;0;0
chr6	37139151	37140049	899	*	Promoter (<=1kb)	6	37140233	37143204	2972	1	5292	uc011dtw.2	-184	ENSG00000137193	PIM1	Pim-1 proto-oncogene, serine/threonine kinase	uc003onl.3;uc010jwr.3;uc010jws.3;uc003onm.4;uc003onk.3;uc011dtw.2	221468;221468;221468;221468;5292;5292	85364;85364;85364;85882;0;0
chr6	37140151	37140799	649	*	Promoter (<=1kb)	6	37140233	37143204	2972	1	5292	uc011dtw.2	0	ENSG00000137193	PIM1	Pim-1 proto-oncogene, serine/threonine kinase	uc003onl.3;uc010jwr.3;uc010jws.3;uc003onm.4;uc003onk.3;uc011dtw.2	221468;221468;221468;221468;5292;5292	84614;84614;84614;85132;0;0
chr6	37141851	37142349	499	*	Promoter (1-2kb)	6	37140233	37143204	2972	1	5292	uc011dtw.2	1618	ENSG00000137193	PIM1	Pim-1 proto-oncogene, serine/threonine kinase	uc003onl.3;uc010jwr.3;uc010jws.3;uc003onm.4;uc003onk.3;uc011dtw.2	221468;221468;221468;221468;5292;5292	83064;83064;83064;83582;0;0
chr6	37150901	37151349	449	*	Distal Intergenic	6	37140233	37143204	2972	1	5292	uc011dtw.2	10668	ENSG00000137193	PIM1	Pim-1 proto-oncogene, serine/threonine kinase	uc003onl.3;uc010jwr.3;uc010jws.3;uc003onm.4;uc003onk.3;uc011dtw.2	221468;221468;221468;221468;5292;5292	74064;74064;74064;74582;0;0
chr6	37159451	37159849	399	*	Distal Intergenic	6	37140233	37143204	2972	1	5292	uc011dtw.2	19218	ENSG00000137193	PIM1	Pim-1 proto-oncogene, serine/threonine kinase	uc003onl.3;uc010jwr.3;uc010jws.3;uc003onm.4;uc003onk.3;uc011dtw.2	221468;221468;221468;221468;5292;5292	65564;65564;65564;66082;0;0
chr6	37282701	37282849	149	*	Intron (uc003onn.3/55633, intron 10 of 12)	6	37273650	37300746	27097	1	55633	uc003onp.3	9051	ENSG00000065491	TBC1D22B	TBC1 domain family member 22B	uc003onn.3;uc010jwt.3;uc003ono.1;uc003onp.3;uc003onq.4;uc003onr.4;uc011dtx.2	55633;55633;55633;55633;9025;9025;9025	0;0;0;0;-38899;-38899;-38899
chr6	37428051	37428349	299	*	Intron (uc010jwu.2/23070, intron 8 of 9)	6	37400907	37449284	48378	1	23070	uc003ons.3	27144	ENSG00000137200	CMTR1	cap methyltransferase 1	uc003ont.3;uc010jwu.2;uc003ons.3	154467;23070;23070	39351;0;0
chr6	37441251	37441449	199	*	Exon (uc003ons.3/23070, exon 17 of 24)	6	37450697	37467700	17004	2	154467	uc003ont.3	26251	ENSG00000198937	CCDC167	coiled-coil domain containing 167	uc003ont.3;uc010jwu.2;uc003ons.3	154467;23070;23070	26251;0;0
chr6	37635301	37635549	249	*	Intron (uc003onu.1/266727, intron 1 of 16)	6	37604691	37615100	10410	2	266727	uc003onv.1	-20201	ENSG00000112139	MDGA1	MAM domain containing glycosylphosphatidylinositol anchor 1	uc003onu.1;uc003onv.1	266727;266727	0;-20201
chr6	37786801	37787699	899	*	Promoter (<=1kb)	6	37787307	38122399	335093	1	60685	uc003onx.3	0	ENSG00000156639	ZFAND3	zinc finger AN1-type containing 3	uc003onx.3	60685	0
chr6	39004801	39005099	299	*	Distal Intergenic	6	39016557	39055046	38490	1	2740	uc003ooh.2	-11458	ENSG00000112164	GLP1R	glucagon like peptide 1 receptor	uc021yzh.1;uc003ooe.2;uc003ooh.2;uc003ooi.2;uc003ooj.4	1769;1769;2740;2740;2740	321684;314249;-11458;-11458;-11458
chr6	39155251	39155549	299	*	Distal Intergenic	6	39156747	39197251	40505	2	8645	uc003oon.3	41702	ENSG00000164626	KCNK5	potassium two pore domain channel subfamily K member 5	uc003oon.3	8645	41702
chr6	40488401	40488799	399	*	Intron (uc003oph.1/57497, intron 1 of 2)	6	40359373	40555126	195754	2	57497	uc003oph.1	66327	ENSG00000156564	LRFN2	leucine rich repeat and fibronectin type III domain containing 2	uc003oph.1	57497	0
chr6	40683551	40683849	299	*	Distal Intergenic	6	40359373	40555126	195754	2	57497	uc003oph.1	-128425	ENSG00000156564	LRFN2	leucine rich repeat and fibronectin type III domain containing 2	NA	NA	NA
chr6	41009901	41010349	449	*	Promoter (<=1kb)	6	41010237	41012076	1840	1	222642	uc003opj.3	0	ENSG00000112212	TSPO2	translocator protein 2	uc003opl.3;uc010jxf.3;uc003opm.3;uc003opn.3;uc010jxg.3;uc010jxh.1;uc003opj.3;uc003opk.3;uc011dub.2;uc003opi.3;uc010jxe.1;uc003opo.3;uc003opp.3;uc003opq.3;uc031soo.1	10930;10930;221443;221443;221443;221443;222642;222642;222642;222643;222643;4800;4800;4800;4800	-10591;-10591;29839;29919;29919;29919;0;0;-108;-2963;0;-30358;-30358;-30612;-36419
chr6	41903851	41904299	449	*	Exon (uc003orm.3/896, exon 4 of 5)	6	41902671	41909144	6474	2	896	uc003orm.3	4845	ENSG00000112576	CCND3	cyclin D3	uc003ori.3;uc003orl.3;uc003orm.3;uc003orn.3;uc003oro.3;uc003orp.3;uc011duk.2;uc011dul.1;uc011dum.1;uc003orj.3;uc003ork.3;uc011duh.2;uc011dui.3;uc011duj.2	25862;705;896;896;896;896;896;896;896;9477;9477;9477;9477;9477	-40752;14886;0;0;0;0;0;0;0;-15170;-14974;-14974;-14974;-14974
chr6	41905901	41906199	299	*	Intron (uc003orm.3/896, intron 2 of 4)	6	41902671	41909144	6474	2	896	uc003orm.3	2945	ENSG00000112576	CCND3	cyclin D3	uc003ori.3;uc003orl.3;uc003orm.3;uc003orn.3;uc003oro.3;uc003orp.3;uc011duk.2;uc011dul.1;uc011dum.1;uc003orj.3;uc003ork.3;uc011duh.2;uc011dui.3;uc011duj.2	25862;705;896;896;896;896;896;896;896;9477;9477;9477;9477;9477	-42802;16936;0;0;0;0;0;0;0;-17220;-17024;-17024;-17024;-17024
chr6	41909451	41909699	249	*	Promoter (<=1kb)	6	41902671	41909552	6882	2	896	uc003orn.3	0	ENSG00000112576	CCND3	cyclin D3	uc003ori.3;uc003orl.3;uc003orm.3;uc003orn.3;uc003oro.3;uc003orp.3;uc011duk.2;uc011dul.1;uc011dum.1;uc003orj.3;uc003ork.3;uc011duh.2;uc011dui.3;uc011duj.2	25862;705;896;896;896;896;896;896;896;9477;9477;9477;9477;9477	-46352;20486;0;0;0;0;0;0;0;-20770;-20574;-20574;-20574;-20574
chr6	41924751	41925299	549	*	Intron (uc003orp.3/896, intron 1 of 4)	6	41904522	41909552	5031	2	896	uc011dul.1	-15199	ENSG00000112576	CCND3	cyclin D3	uc003orl.3;uc003orm.3;uc003orn.3;uc003oro.3;uc003orp.3;uc011duk.2;uc011dul.1;uc011dum.1;uc003orj.3;uc003ork.3;uc011duh.2;uc011dui.3;uc011duj.2	705;896;896;896;896;896;896;896;9477;9477;9477;9477;9477	35786;0;0;0;0;0;0;0;-36070;-35874;-35874;-35874;-35874
chr6	41942551	41942649	99	*	Intron (uc003orp.3/896, intron 1 of 4)	6	41904522	41909552	5031	2	896	uc011dul.1	-32999	ENSG00000112576	CCND3	cyclin D3	uc003orl.3;uc003orm.3;uc003orn.3;uc003oro.3;uc003orp.3;uc011duk.2;uc011dul.1;uc011dum.1	705;896;896;896;896;896;896;896	53586;0;0;0;0;0;0;0
chr6	41978251	41978499	249	*	Intron (uc003orp.3/896, intron 1 of 4)	6	41902671	42016610	113940	2	896	uc003orp.3	38111	ENSG00000112576	CCND3	cyclin D3	uc003orr.3;uc003ors.3;uc003ort.3;uc003oru.1;uc003orv.1;uc011dun.2;uc003orp.3;uc011duk.2;uc011dum.1	129685;129685;129685;129685;129685;129685;896;896;896	-39752;-39752;-39752;-39752;-39752;-40159;0;0;0
chr6	41984651	41985449	799	*	Intron (uc003orp.3/896, intron 1 of 4)	6	41902671	42016610	113940	2	896	uc003orp.3	31161	ENSG00000112576	CCND3	cyclin D3	uc003orr.3;uc003ors.3;uc003ort.3;uc003oru.1;uc003orv.1;uc011dun.2;uc003orp.3;uc011duk.2;uc011dum.1	129685;129685;129685;129685;129685;129685;896;896;896	-32802;-32802;-32802;-32802;-32802;-33209;0;0;0
chr6	41998951	41999149	199	*	Intron (uc003orp.3/896, intron 1 of 4)	6	41902671	42016610	113940	2	896	uc003orp.3	17461	ENSG00000112576	CCND3	cyclin D3	uc003orr.3;uc003ors.3;uc003ort.3;uc003oru.1;uc003orv.1;uc011dun.2;uc003orp.3;uc011duk.2;uc011dum.1	129685;129685;129685;129685;129685;129685;896;896;896	-19102;-19102;-19102;-19102;-19102;-19509;0;0;0
chr6	42013301	42013799	499	*	Intron (uc003orp.3/896, intron 1 of 4)	6	41902671	42016610	113940	2	896	uc003orp.3	2811	ENSG00000112576	CCND3	cyclin D3	uc003orr.3;uc003ors.3;uc003ort.3;uc003oru.1;uc003orv.1;uc011dun.2;uc003orp.3;uc011duk.2;uc011dum.1	129685;129685;129685;129685;129685;129685;896;896;896	-4452;-4452;-4452;-4452;-4452;-4859;0;0;0
chr6	42060001	42060399	399	*	Distal Intergenic	6	42018658	42048644	29987	1	129685	uc011dun.2	41343	ENSG00000137413	TAF8	TATA-box binding protein associated factor 8	uc003orr.3;uc003ors.3;uc003ort.3;uc003oru.1;uc003orv.1;uc011dun.2;uc003orw.2;uc003orp.3;uc011duk.2;uc011dum.1	129685;129685;129685;129685;129685;129685;647024;896;896;896	41750;41750;41750;41750;41750;41343;50316;0;0;0
chr6	42165301	42165799	499	*	Distal Intergenic	6	42151022	42162694	11673	2	2979	uc003orz.3	-2607	ENSG00000112599	GUCA1B	guanylate cyclase activator 1B	uc003orx.3;uc010jxt.3;uc011duo.3;uc003orz.3;uc003osa.4;uc011dup.2;uc011duq.1;uc003osb.2;uc003osc.2;uc003osd.2;uc003ose.2	2978;2978;2978;2979;55173;55173;55809;55809;55809;55809;55809	42157;42157;42157;-2607;19834;19834;71787;253200;253200;253984;253984
chr6	42523201	42523549	349	*	Distal Intergenic	6	42531760	42588089	56330	1	23304	uc003osf.3	-8211	ENSG00000024048	UBR2	ubiquitin protein ligase E3 component n-recognin 2	uc003osf.3;uc011dur.2	23304;23304	-8211;-8211
chr6	42750251	42751349	1099	*	Promoter (<=1kb)	6	42749790	42836296	86507	1	23506	uc011duw.1	461	ENSG00000112624	BICRAL	BICRA like chromatin remodeling complex associated protein	uc003osm.1;uc003osn.1;uc011duw.1;uc003oso.1;uc003osp.1;uc003osl.3	23506;23506;23506;23506;23506;6903	0;0;0;-37445;-37445;-36367
chr6	42858251	42858899	649	*	Promoter (<=1kb)	6	42858003	42858554	552	2	441150	uc003osw.3	0	ENSG00000221821	C6orf226	chromosome 6 open reading frame 226	uc003osy.2;uc003ota.4;uc003otb.4;uc011duz.1;uc010jxx.1;uc003osx.3;uc010jxy.3;uc010jxz.3;uc021yzp.1;uc003osm.1;uc003osn.1;uc011duw.1;uc003osp.1;uc011dux.1;uc003osq.1;uc003osr.1;uc010jxw.1;uc011duy.1;uc003oss.2;uc003ost.3;uc003osw.3	10695;10695;10695;171558;171558;171558;171558;171558;171558;23506;23506;23506;23506;285855;285855;285855;285855;285855;285855;285855;441150	-37961;-37961;-37961;-24828;-24828;-24828;-24828;-24828;-24828;0;0;0;69457;10580;10580;10580;10580;10580;10580;10580;0
chr6	42861751	42862199	449	*	Distal Intergenic	6	42858003	42858554	552	2	441150	uc003osw.3	-3197	ENSG00000221821	C6orf226	chromosome 6 open reading frame 226	uc003osy.2;uc003ota.4;uc003otb.4;uc011duz.1;uc010jxx.1;uc003osx.3;uc010jxy.3;uc010jxz.3;uc021yzp.1;uc003osm.1;uc003osn.1;uc011duw.1;uc003osp.1;uc011dux.1;uc003osq.1;uc003osr.1;uc010jxw.1;uc011duy.1;uc003oss.2;uc003ost.3;uc003osw.3	10695;10695;10695;171558;171558;171558;171558;171558;171558;23506;23506;23506;23506;285855;285855;285855;285855;285855;285855;285855;441150	-34661;-34661;-34661;-21528;-21528;-21528;-21528;-21528;-21528;0;0;0;72957;14080;14080;14080;14080;14080;14080;14080;0
chr6	43021401	43021749	349	*	Promoter (<=1kb)	6	43005355	43021683	16329	2	9820	uc003otq.3	0	ENSG00000044090	CUL7	cullin 7	uc003otl.3;uc003otm.3;uc003otn.3;uc003oto.3;uc010jyc.1;uc003otk.3;uc003ots.1;uc011dvc.2;uc010jyi.3;uc003ott.4;uc003oth.4;uc003oti.4;uc010jyd.4;uc011dva.3;uc021yzq.2;uc003otj.4;uc003oua.4;uc003oub.2;uc003ouc.2;uc003oud.2;uc003oue.2;uc003ouf.2;uc003oug.2;uc011dve.2;uc003otp.1;uc003otr.1;uc003otu.3;uc003otv.1;uc011dvd.1;uc003otw.1;uc003otx.1;uc003oty.1;uc003otz.1;uc010jyg.3;uc003otq.3;uc011dvb.2	116138;116138;116138;116138;4201;4201;51069;51069;51069;51069;5528;5528;5528;5528;5528;5528;5754;5754;5754;5754;5754;5754;5754;5754;88745;89953;89953;89953;89953;89953;89953;89953;89953;9820;9820;9820	39560;39560;39560;36678;-39741;-39783;5493;5493;5410;5493;69164;69164;69164;69164;69164;47163;-22257;-22257;-22257;-22257;-22257;-22257;-22257;-22803;32016;0;-5394;-5394;-5394;-5880;-5884;-5884;-6433;-6649;0;0
chr6	43138901	43139249	349	*	Promoter (<=1kb)	6	43138920	43149244	10325	1	6722	uc003oui.3	0	ENSG00000112658	SRF	serum response factor	uc003ouj.1;uc003ouk.3;uc003oul.3;uc010jyk.3;uc003oum.1;uc003oun.3;uc003oua.4;uc003oub.2;uc003ouc.2;uc003oud.2;uc003oue.2;uc003ouf.2;uc003oug.2;uc011dve.2;uc010jyj.2;uc003oui.3;uc011dvf.2	23113;23113;23113;23113;23113;23113;5754;5754;5754;5754;5754;5754;5754;5754;5754;6722;6722	-10673;-10673;-10673;-10673;-15417;-42286;94895;94895;94895;94895;94895;94895;94895;94349;38742;0;-879
chr6	43484301	43484599	299	*	Promoter (<=1kb)	6	43479565	43484728	5164	2	25844	uc003ovl.2	129	ENSG00000137207	YIPF3	Yip1 domain family member 3	uc003ovj.2;uc003ovk.2;uc031soq.1;uc003ovl.2;uc011dvk.2;uc003ovp.3;uc003ovc.2;uc003ovd.2;uc003ove.2;uc003ovf.2;uc010jyp.2;uc011dvh.1;uc003ovg.2;uc010jyq.2;uc011dvi.1;uc011dvj.3;uc003ovi.2;uc003ovn.3;uc003ovo.2	221424;221424;221424;25844;25844;57510;93643;93643;93643;93643;93643;93643;93643;93643;93643;93643;93643;9533;9533	-7559;-6220;-6220;0;0;59213;39040;39040;39040;39040;39040;39040;27086;26979;26979;15037;14515;-178;-178
chr6	43597751	43598299	549	*	Promoter (<=1kb)	6	43597279	43608688	11410	1	9587	uc003ovu.3	472	ENSG00000124688	MAD2L1BP	MAD2L1 binding protein	uc003ovw.2;uc003ovx.2;uc010jyu.2;uc011dvl.1;uc003ovq.4;uc003ovr.4;uc010jyv.3;uc003ovs.3;uc003ovy.2;uc003ovz.2;uc003owa.2;uc010jyw.3;uc003ovu.3;uc003ovv.3	221421;221421;5429;5429;5429;5429;54676;54676;55168;55168;55168;55168;9587;9587	-14468;-14468;53873;53873;53873;43226;-2661;-815;57250;57250;57250;57250;0;-5278
chr6	43692801	43693249	449	*	Distal Intergenic	6	43645542	43655549	10008	2	55168	uc010jyw.3	-37252	ENSG00000096080	MRPS18A	mitochondrial ribosomal protein S18A	uc003ovy.2;uc003ovz.2;uc003owa.2;uc010jyw.3;uc003owb.3;uc003owd.3;uc003owe.3;uc003owf.3;uc003owg.3;uc003owh.3;uc003owi.3;uc003owj.3;uc010jyx.3;uc021yzu.1	55168;55168;55168;55168;7422;7422;7422;7422;7422;7422;7422;7422;7422;7422	-37252;-37252;-37252;-37252;0;0;0;0;0;0;0;0;0;0
chr6	43707351	43707749	399	*	Distal Intergenic	6	43737946	43745562	7617	1	7422	uc003owb.3	-30197	ENSG00000112715	VEGFA	vascular endothelial growth factor A	uc003owb.3;uc003owd.3;uc003owe.3;uc003owf.3;uc003owg.3;uc003owh.3;uc003owi.3;uc003owj.3;uc010jyx.3;uc021yzu.1;uc003owk.3	7422;7422;7422;7422;7422;7422;7422;7422;7422;7422;7422	0;0;0;0;0;0;0;0;0;0;-37711
chr6	43738201	43739849	1649	*	Promoter (<=1kb)	6	43737946	43754223	16278	1	7422	uc021yzu.1	255	ENSG00000112715	VEGFA	vascular endothelial growth factor A	uc003owb.3;uc003owd.3;uc003owe.3;uc003owf.3;uc003owg.3;uc003owh.3;uc003owi.3;uc003owj.3;uc010jyx.3;uc021yzu.1;uc003owk.3	7422;7422;7422;7422;7422;7422;7422;7422;7422;7422;7422	0;0;0;0;0;0;0;0;0;0;-5611
chr6	43742601	43742799	199	*	Intron (uc003owb.3/7422, intron 2 of 2)	6	43745460	43754223	8764	1	7422	uc003owk.3	-2661	ENSG00000112715	VEGFA	vascular endothelial growth factor A	uc003owb.3;uc003owd.3;uc003owe.3;uc003owf.3;uc003owg.3;uc003owh.3;uc003owi.3;uc003owj.3;uc010jyx.3;uc021yzu.1;uc003owk.3	7422;7422;7422;7422;7422;7422;7422;7422;7422;7422;7422	0;0;0;0;0;0;0;0;0;0;-2661
chr6	43937301	43937449	149	*	Distal Intergenic	6	43968337	43973694	5358	1	221416	uc003own.3	-30888	ENSG00000181577	LINC03040	long intergenic non-protein coding RNA 3040	uc011dvm.2;uc003own.3;uc003owo.3	100132354;221416;221416	78536;-30888;-30888
chr6	44026251	44026749	499	*	Intron (uc003owm.1/uc003owm.1, intron 1 of 4)	6	43968337	43973694	5358	1	221416	uc003owo.3	57914	ENSG00000181577	LINC03040	long intergenic non-protein coding RNA 3040	NA	NA	NA
chr6	44094851	44095349	499	*	Promoter (<=1kb)	6	44081373	44095191	13819	2	64928	uc003owp.3	0	ENSG00000180992	MRPL14	mitochondrial ribosomal protein L14	uc003owt.1;uc011dvn.2;uc003owq.1;uc003owr.3;uc010jyy.1;uc003ows.3;uc010jyz.3;uc003owp.3	11131;11131;55362;55362;55362;55362;55362;64928	-31199;-48969;0;0;0;-7405;-12096;0
chr6	44097851	44098099	249	*	Intron (uc003owq.1/55362, intron 1 of 14)	6	44095457	44108250	12794	1	55362	uc010jyy.1	2394	ENSG00000137216	TMEM63B	transmembrane protein 63B	uc003owt.1;uc011dvn.2;uc003owq.1;uc003owr.3;uc010jyy.1;uc003ows.3;uc010jyz.3;uc003owp.3	11131;11131;55362;55362;55362;55362;55362;64928	-28449;-46219;0;0;0;-4655;-9346;0
chr6	44101901	44102449	549	*	Promoter (<=1kb)	6	44102754	44123256	20503	1	55362	uc003ows.3	-305	ENSG00000137216	TMEM63B	transmembrane protein 63B	uc003owt.1;uc011dvn.2;uc003owq.1;uc003owr.3;uc010jyy.1;uc003ows.3;uc010jyz.3;uc003owp.3	11131;11131;55362;55362;55362;55362;55362;64928	-24099;-41869;0;0;0;-305;-4996;0
chr6	44193451	44193949	499	*	Promoter (1-2kb)	6	44191637	44197528	5892	1	2030	uc021yzx.1	1814	ENSG00000112759	SLC29A1	solute carrier family 29 member 1 (Augustine blood group)	uc021yzy.1;uc003owt.1;uc011dvn.2;uc021yzw.1;uc011dvp.1;uc003owu.1;uc003owv.1;uc003oww.1;uc011dvq.2;uc003owx.2;uc003owy.2;uc003owz.1;uc021yzx.1;uc003oxg.3;uc031sor.1;uc003oxa.2;uc003oxb.2;uc011dvr.2;uc011dvs.2;uc003oxc.2;uc003oxd.3;uc011dvt.2;uc011dvu.2;uc003oxh.2;uc003oxf.2;uc003oxe.1	100616124;11131;11131;2030;2030;2030;2030;2030;2030;2030;2030;2030;2030;221409;3326;3326;3326;3326;3326;3326;347734;347734;347734;441151;441151;4794	28073;66903;49133;0;0;0;0;0;0;0;0;0;0;-46854;-19954;-20746;-20746;-20746;-20746;-23799;31334;31334;31334;-44531;-44531;39576
chr6	45345151	45345549	399	*	Promoter (<=1kb)	6	44777054	45345788	568735	2	8464	uc003oxn.2	239	ENSG00000196284	SUPT3H	SPT3 homolog, SAGA and STAGA complex component	uc003oxn.2;uc003oxo.4;uc003oxp.4;uc011dvv.3;uc011dvx.2;uc011dvy.2;uc003oxs.1;uc003oxt.3	8464;8464;8464;8464;860;860;860;860	0;0;0;0;0;0;49091;-44365
chr6	46185401	46186149	749	*	Distal Intergenic	6	46127762	46138717	10956	2	59084	uc011dvz.1	-46684	ENSG00000112796	ENPP5	ectonucleotide pyrophosphatase/phosphodiesterase family member 5	uc003oyb.2;uc003oyc.2;uc003oyd.2;uc003oxz.1;uc003oya.1;uc010jzc.1;uc011dvz.1	10231;10231;10231;59084;59084;59084;59084	107480;272911;273655;-46684;-46684;-46684;-46684
chr6	47210251	47210399	149	*	Intron (uc003oyv.3/27242, intron 4 of 5)	6	47199268	47277680	78413	2	27242	uc003oyv.3	67281	ENSG00000146072	TNFRSF21	TNF receptor superfamily member 21	uc003oyv.3	27242	0
chr6	47445701	47445899	199	*	Promoter (<=1kb)	6	47445525	47594996	149472	1	23607	uc003oyw.3	176	ENSG00000198087	CD2AP	CD2 associated protein	uc003oyw.3	23607	0
chr6	49304351	49304899	549	*	Distal Intergenic	6	49398073	49431041	32969	2	4594	uc003ozg.4	126142	ENSG00000146085	MMUT	methylmalonyl-CoA mutase	NA	NA	NA
chr6	49613951	49614349	399	*	Distal Intergenic	6	49572890	49604587	31698	2	6005	uc010jzm.3	-9364	ENSG00000112077	RHAG	Rh associated glycoprotein	uc003ozk.4;uc010jzl.3;uc010jzm.3;uc003ozl.3;uc003ozm.3;uc003ozn.3;uc003ozo.3;uc003ozp.3;uc003ozq.3;uc003ozr.3;uc031sou.1	6005;6005;6005;7180;7180;7180;7180;7180;7180;7180;7180	-9364;-9364;-9364;66954;66954;66954;66954;66954;66954;66954;66954
chr6	49807701	49808099	399	*	Intron (uc003ozw.2/167, intron 6 of 7)	6	49801979	49834218	32240	2	167	uc003ozw.2	26119	ENSG00000124812	CRISP1	cysteine rich secretory protein 1	uc003ozw.2;uc003ozx.2;uc021zaj.1	167;167;167	0;0;0
chr6	50991251	50991599	349	*	Distal Intergenic	6	50786439	50815326	28888	1	7021	uc003pag.3	204812	ENSG00000008196	TFAP2B	transcription factor AP-2 beta	NA	NA	NA
chr6	52368901	52369199	299	*	Promoter (1-2kb)	6	52370340	52370934	595	2	9697	uc003par.1	1735	ENSG00000065308	TRAM2	translocation associated membrane protein 2	uc003pap.4;uc011dwv.1;uc011dww.2;uc003paq.3;uc003par.1	114327;114327;114327;9697;9697	83907;0;83096;0;1735
chr6	52571551	52571799	249	*	Distal Intergenic	6	52535884	52551385	15502	1	28978	uc003pax.3	35667	ENSG00000096092	TMEM14A	transmembrane protein 14A	uc003pax.3;uc003pay.3;uc003pav.2;uc003paw.3;uc021zam.1	28978;2939;730101;730101;730152	35667;56562;42352;42352;38158
chr6	52900701	52900949	249	*	Intron (uc003pbh.2/22858, intron 4 of 14)	6	52880346	52925972	45627	2	22858	uc003pbj.3	25023	ENSG00000112144	CILK1	ciliogenesis associated kinase 1	uc003pbh.2;uc003pbi.2;uc003pbj.3;uc021zao.1;uc021zap.1;uc021zaq.1;uc021zar.1;uc021zas.1;uc003pbd.3;uc003pbf.3	22858;22858;22858;26268;26268;26268;26268;26268;2941;2941	0;0;0;-28847;-29308;-29308;-34822;-34822;-41596;-40523
chr6	53223701	53224349	649	*	Distal Intergenic	6	53158888	53213977	55090	2	60481	uc003pbu.3	-9724	ENSG00000012660	ELOVL5	ELOVL fatty acid elongase 5	uc003pbq.1;uc003pbr.2;uc003pbs.2;uc011dwx.2;uc003pbu.3;uc011dwy.1;uc031sox.1	60481;60481;60481;60481;60481;60481;647190	-10114;-9724;-9724;-9724;-9724;-10714;-21286
chr6	56747651	56747949	299	*	Intron (uc021zba.2/667, intron 3 of 96)	6	56322785	56716714	393930	2	667	uc021zay.2	-30937	ENSG00000151914	DST	dystonin	uc021zaz.2;uc021zay.2;uc021zba.2;uc011dxl.1	667;667;667;667	-39188;-30937;0;-31238
chr6	57036951	57037249	299	*	Promoter (<=1kb)	6	57037104	57050012	12909	1	9532	uc003pdr.3	0	ENSG00000112208	BAG2	BAG cochaperone 2	uc003pdk.2;uc003pdl.4;uc003pdm.2;uc003pdn.2;uc003pds.3;uc003pdt.3;uc010kac.3;uc010kad.3;uc003pdr.3;uc011dxo.2	26036;26036;26036;26036;51715;51715;51715;51715;9532;9532	82143;82143;82143;82143;49008;49829;49852;49852;0;-985
chr6	57207701	57207949	249	*	Intron (uc003pdw.3/5558, intron 5 of 6)	6	57182422	57513376	330955	1	5558	uc003pdx.3	25279	ENSG00000146143	PRIM2	DNA primase subunit 2	uc003pdv.1;uc003pdw.3;uc003pdx.3	5558;5558;5558	25279;0;0
chr6	57212201	57212499	299	*	Intron (uc003pdw.3/5558, intron 5 of 6)	6	57182422	57513376	330955	1	5558	uc003pdx.3	29779	ENSG00000146143	PRIM2	DNA primase subunit 2	uc003pdv.1;uc003pdw.3;uc003pdx.3	5558;5558;5558	29779;0;0
chr6	57215051	57215299	249	*	Intron (uc003pdw.3/5558, intron 5 of 6)	6	57182422	57513376	330955	1	5558	uc003pdx.3	32629	ENSG00000146143	PRIM2	DNA primase subunit 2	uc003pdv.1;uc003pdw.3;uc003pdx.3	5558;5558;5558	32629;0;0
chr6	57225901	57226149	249	*	Intron (uc003pdw.3/5558, intron 5 of 6)	6	57182422	57513376	330955	1	5558	uc003pdx.3	43479	ENSG00000146143	PRIM2	DNA primase subunit 2	uc003pdv.1;uc003pdw.3;uc003pdx.3	5558;5558;5558	43479;0;0
chr6	57261601	57261749	149	*	Intron (uc003pdx.3/5558, intron 7 of 15)	6	57182422	57513376	330955	1	5558	uc003pdx.3	79179	ENSG00000146143	PRIM2	DNA primase subunit 2	uc003pdw.3;uc003pdx.3	5558;5558	0;0
chr6	57291801	57292249	449	*	Intron (uc003pdx.3/5558, intron 7 of 15)	6	57182422	57513376	330955	1	5558	uc003pdx.3	109379	ENSG00000146143	PRIM2	DNA primase subunit 2	uc003pdw.3;uc003pdx.3	5558;5558	0;0
chr6	57295401	57295599	199	*	Intron (uc003pdx.3/5558, intron 7 of 15)	6	57182422	57513376	330955	1	5558	uc003pdx.3	112979	ENSG00000146143	PRIM2	DNA primase subunit 2	uc003pdw.3;uc003pdx.3	5558;5558	0;0
chr6	57305401	57306349	949	*	Intron (uc003pdx.3/5558, intron 7 of 15)	6	57182422	57513376	330955	1	5558	uc003pdx.3	122979	ENSG00000146143	PRIM2	DNA primase subunit 2	uc003pdx.3	5558	0
chr6	57314601	57314899	299	*	Intron (uc003pdx.3/5558, intron 7 of 15)	6	57182422	57513376	330955	1	5558	uc003pdx.3	132179	ENSG00000146143	PRIM2	DNA primase subunit 2	uc003pdx.3	5558	0
chr6	57325001	57325099	99	*	Intron (uc003pdx.3/5558, intron 7 of 15)	6	57182422	57513376	330955	1	5558	uc003pdx.3	142579	ENSG00000146143	PRIM2	DNA primase subunit 2	uc003pdx.3	5558	0
chr6	57331251	57331349	99	*	Intron (uc003pdx.3/5558, intron 7 of 15)	6	57182422	57513376	330955	1	5558	uc003pdx.3	148829	ENSG00000146143	PRIM2	DNA primase subunit 2	uc003pdx.3	5558	0
chr6	57380401	57380699	299	*	Intron (uc003pdx.3/5558, intron 8 of 15)	6	57182422	57513376	330955	1	5558	uc003pdx.3	197979	ENSG00000146143	PRIM2	DNA primase subunit 2	uc003pdx.3	5558	0
chr6	57388101	57388799	699	*	Intron (uc003pdx.3/5558, intron 8 of 15)	6	57182422	57513376	330955	1	5558	uc003pdx.3	205679	ENSG00000146143	PRIM2	DNA primase subunit 2	uc003pdx.3	5558	0
chr6	57389651	57390149	499	*	Intron (uc003pdx.3/5558, intron 8 of 15)	6	57182422	57513376	330955	1	5558	uc003pdx.3	207229	ENSG00000146143	PRIM2	DNA primase subunit 2	uc003pdx.3	5558	0
chr6	57391151	57391499	349	*	Intron (uc003pdx.3/5558, intron 8 of 15)	6	57182422	57513376	330955	1	5558	uc003pdx.3	208729	ENSG00000146143	PRIM2	DNA primase subunit 2	uc003pdx.3	5558	0
chr6	57392301	57392549	249	*	Intron (uc003pdx.3/5558, intron 8 of 15)	6	57182422	57513376	330955	1	5558	uc003pdx.3	209879	ENSG00000146143	PRIM2	DNA primase subunit 2	uc003pdx.3	5558	0
chr6	57394001	57394299	299	*	Intron (uc003pdx.3/5558, intron 9 of 15)	6	57182422	57513376	330955	1	5558	uc003pdx.3	211579	ENSG00000146143	PRIM2	DNA primase subunit 2	uc003pdx.3	5558	0
chr6	57406201	57406549	349	*	Intron (uc003pdx.3/5558, intron 10 of 15)	6	57182422	57513376	330955	1	5558	uc003pdx.3	223779	ENSG00000146143	PRIM2	DNA primase subunit 2	uc003pdx.3	5558	0
chr6	57413851	57414049	199	*	Intron (uc003pdx.3/5558, intron 10 of 15)	6	57182422	57513376	330955	1	5558	uc003pdx.3	231429	ENSG00000146143	PRIM2	DNA primase subunit 2	uc003pdx.3	5558	0
chr6	57417401	57417949	549	*	Intron (uc003pdx.3/5558, intron 10 of 15)	6	57182422	57513376	330955	1	5558	uc003pdx.3	234979	ENSG00000146143	PRIM2	DNA primase subunit 2	uc003pdx.3	5558	0
chr6	57419801	57420649	849	*	Intron (uc003pdx.3/5558, intron 10 of 15)	6	57182422	57513376	330955	1	5558	uc003pdx.3	237379	ENSG00000146143	PRIM2	DNA primase subunit 2	uc003pdx.3	5558	0
chr6	57443201	57444149	949	*	Intron (uc003pdx.3/5558, intron 10 of 15)	6	57182422	57513376	330955	1	5558	uc003pdx.3	260779	ENSG00000146143	PRIM2	DNA primase subunit 2	uc003pdx.3	5558	0
chr6	57447501	57447999	499	*	Intron (uc003pdx.3/5558, intron 10 of 15)	6	57182422	57513376	330955	1	5558	uc003pdx.3	265079	ENSG00000146143	PRIM2	DNA primase subunit 2	uc003pdx.3	5558	0
chr6	57452601	57453399	799	*	Intron (uc003pdx.3/5558, intron 10 of 15)	6	57182422	57513376	330955	1	5558	uc003pdx.3	270179	ENSG00000146143	PRIM2	DNA primase subunit 2	uc003pdx.3	5558	0
chr6	57454301	57454899	599	*	Intron (uc003pdx.3/5558, intron 10 of 15)	6	57182422	57513376	330955	1	5558	uc003pdx.3	271879	ENSG00000146143	PRIM2	DNA primase subunit 2	uc003pdx.3	5558	0
chr6	57463101	57463399	299	*	Intron (uc003pdx.3/5558, intron 10 of 15)	6	57182422	57513376	330955	1	5558	uc003pdx.3	280679	ENSG00000146143	PRIM2	DNA primase subunit 2	uc003pdx.3	5558	0
chr6	57472451	57472599	149	*	Intron (uc003pdx.3/5558, intron 13 of 15)	6	57182422	57513376	330955	1	5558	uc003pdx.3	290029	ENSG00000146143	PRIM2	DNA primase subunit 2	uc003pdx.3	5558	0
chr6	57474951	57475399	449	*	Intron (uc003pdx.3/5558, intron 13 of 15)	6	57182422	57513376	330955	1	5558	uc003pdx.3	292529	ENSG00000146143	PRIM2	DNA primase subunit 2	uc003pdx.3	5558	0
chr6	57479651	57479999	349	*	Intron (uc003pdx.3/5558, intron 13 of 15)	6	57182422	57513376	330955	1	5558	uc003pdx.3	297229	ENSG00000146143	PRIM2	DNA primase subunit 2	uc003pdx.3	5558	0
chr6	57480151	57480349	199	*	Intron (uc003pdx.3/5558, intron 13 of 15)	6	57182422	57513376	330955	1	5558	uc003pdx.3	297729	ENSG00000146143	PRIM2	DNA primase subunit 2	uc003pdx.3	5558	0
chr6	57485251	57486199	949	*	Intron (uc003pdx.3/5558, intron 13 of 15)	6	57182422	57513376	330955	1	5558	uc003pdx.3	302829	ENSG00000146143	PRIM2	DNA primase subunit 2	uc003pdx.3	5558	0
chr6	57493501	57493749	249	*	Intron (uc003pdx.3/5558, intron 13 of 15)	6	57182422	57513376	330955	1	5558	uc003pdx.3	311079	ENSG00000146143	PRIM2	DNA primase subunit 2	uc003pdx.3	5558	0
chr6	57494651	57495349	699	*	Intron (uc003pdx.3/5558, intron 13 of 15)	6	57182422	57513376	330955	1	5558	uc003pdx.3	312229	ENSG00000146143	PRIM2	DNA primase subunit 2	uc003pdx.3	5558	0
chr6	57498101	57498449	349	*	Intron (uc003pdx.3/5558, intron 13 of 15)	6	57182422	57513376	330955	1	5558	uc003pdx.3	315679	ENSG00000146143	PRIM2	DNA primase subunit 2	uc003pdx.3	5558	0
chr6	57503101	57503349	249	*	Intron (uc003pdx.3/5558, intron 14 of 15)	6	57182422	57513376	330955	1	5558	uc003pdx.3	320679	ENSG00000146143	PRIM2	DNA primase subunit 2	uc003pdx.3	5558	0
chr6	57504851	57505249	399	*	Intron (uc003pdx.3/5558, intron 14 of 15)	6	57182422	57513376	330955	1	5558	uc003pdx.3	322429	ENSG00000146143	PRIM2	DNA primase subunit 2	uc003pdx.3	5558	0
chr6	57505701	57506149	449	*	Intron (uc003pdx.3/5558, intron 14 of 15)	6	57182422	57513376	330955	1	5558	uc003pdx.3	323279	ENSG00000146143	PRIM2	DNA primase subunit 2	uc003pdx.3	5558	0
chr6	57506601	57506899	299	*	Intron (uc003pdx.3/5558, intron 14 of 15)	6	57182422	57513376	330955	1	5558	uc003pdx.3	324179	ENSG00000146143	PRIM2	DNA primase subunit 2	uc003pdx.3	5558	0
chr6	57507551	57507799	249	*	Intron (uc003pdx.3/5558, intron 14 of 15)	6	57182422	57513376	330955	1	5558	uc003pdx.3	325129	ENSG00000146143	PRIM2	DNA primase subunit 2	uc003pdx.3	5558	0
chr6	57511451	57511749	299	*	Intron (uc003pdx.3/5558, intron 14 of 15)	6	57182422	57513376	330955	1	5558	uc003pdx.3	329029	ENSG00000146143	PRIM2	DNA primase subunit 2	uc003pdx.3	5558	0
chr6	57513801	57514249	449	*	Distal Intergenic	6	57182422	57513376	330955	1	5558	uc003pdx.3	331379	ENSG00000146143	PRIM2	DNA primase subunit 2	uc003pdx.3	5558	0
chr6	57518451	57519149	699	*	Distal Intergenic	6	57182422	57513376	330955	1	5558	uc003pdx.3	336029	ENSG00000146143	PRIM2	DNA primase subunit 2	uc003pdx.3	5558	0
chr6	57524351	57524499	149	*	Distal Intergenic	6	57182422	57513376	330955	1	5558	uc003pdx.3	341929	ENSG00000146143	PRIM2	DNA primase subunit 2	uc003pdx.3	5558	0
chr6	57525451	57525899	449	*	Distal Intergenic	6	57182422	57513376	330955	1	5558	uc003pdx.3	343029	ENSG00000146143	PRIM2	DNA primase subunit 2	uc003pdx.3	5558	0
chr6	57532251	57532799	549	*	Distal Intergenic	6	57182422	57513376	330955	1	5558	uc003pdx.3	349829	ENSG00000146143	PRIM2	DNA primase subunit 2	uc003pdx.3	5558	0
chr6	57542301	57543199	899	*	Distal Intergenic	6	57182422	57513376	330955	1	5558	uc003pdx.3	359879	ENSG00000146143	PRIM2	DNA primase subunit 2	uc003pdx.3	5558	0
chr6	57545651	57545899	249	*	Distal Intergenic	6	57182422	57513376	330955	1	5558	uc003pdx.3	363229	ENSG00000146143	PRIM2	DNA primase subunit 2	uc003pdx.3	5558	0
chr6	57546051	57546299	249	*	Distal Intergenic	6	57182422	57513376	330955	1	5558	uc003pdx.3	363629	ENSG00000146143	PRIM2	DNA primase subunit 2	uc003pdx.3	5558	0
chr6	57546451	57547199	749	*	Distal Intergenic	6	57182422	57513376	330955	1	5558	uc003pdx.3	364029	ENSG00000146143	PRIM2	DNA primase subunit 2	uc003pdx.3	5558	0
chr6	57554151	57554649	499	*	Distal Intergenic	6	57182422	57513376	330955	1	5558	uc003pdx.3	371729	ENSG00000146143	PRIM2	DNA primase subunit 2	uc003pdx.3	5558	0
chr6	57556651	57557149	499	*	Distal Intergenic	6	57182422	57513376	330955	1	5558	uc003pdx.3	374229	ENSG00000146143	PRIM2	DNA primase subunit 2	uc003pdx.3	5558	0
chr6	57562001	57562799	799	*	Distal Intergenic	6	57182422	57513376	330955	1	5558	uc003pdx.3	379579	ENSG00000146143	PRIM2	DNA primase subunit 2	uc003pdx.3	5558	0
chr6	57564501	57564849	349	*	Distal Intergenic	6	57182422	57513376	330955	1	5558	uc003pdx.3	382079	ENSG00000146143	PRIM2	DNA primase subunit 2	NA	NA	NA
chr6	57565951	57566149	199	*	Distal Intergenic	6	57182422	57513376	330955	1	5558	uc003pdx.3	383529	ENSG00000146143	PRIM2	DNA primase subunit 2	NA	NA	NA
chr6	61909551	61910599	1049	*	Distal Intergenic	6	62389865	62996100	606236	2	202559	uc003peg.2	1085501	ENSG00000112232	KHDRBS2	KH RNA binding domain containing, signal transduction associated 2	NA	NA	NA
chr6	70506751	70507149	399	*	Promoter (<=1kb)	6	70385641	70507049	121409	2	55788	uc003pfa.3	0	ENSG00000168216	LMBRD1	LMBR1 domain containing 1	uc003pez.3;uc010kal.3;uc003pfa.3;uc003pfb.3	55788;55788;55788;55788	-6194;-217;0;0
chr6	73270601	73271099	499	*	Distal Intergenic	6	73331571	73834372	502802	1	56479	uc003pgj.4	-60472	ENSG00000185760	KCNQ5	potassium voltage-gated channel subfamily Q member 5	NA	NA	NA
chr6	73331401	73331649	249	*	Promoter (<=1kb)	6	73331571	73834372	502802	1	56479	uc003pgj.4	0	ENSG00000185760	KCNQ5	potassium voltage-gated channel subfamily Q member 5	uc003pgj.4;uc003pgk.3;uc010kat.3;uc011dyh.2;uc011dyi.2;uc011dyj.2;uc011dyk.2	56479;56479;56479;56479;56479;56479;56479	0;0;0;0;0;0;0
chr6	73332201	73332499	299	*	Promoter (<=1kb)	6	73331571	73908573	577003	1	56479	uc011dyk.2	630	ENSG00000185760	KCNQ5	potassium voltage-gated channel subfamily Q member 5	uc003pgj.4;uc003pgk.3;uc010kat.3;uc011dyh.2;uc011dyi.2;uc011dyj.2;uc011dyk.2	56479;56479;56479;56479;56479;56479;56479	0;0;0;0;0;0;0
chr6	73424951	73425349	399	*	Intron (uc003pgj.4/56479, intron 1 of 8)	6	73331571	73908573	577003	1	56479	uc011dyk.2	93380	ENSG00000185760	KCNQ5	potassium voltage-gated channel subfamily Q member 5	uc003pgj.4;uc003pgk.3;uc010kat.3;uc011dyh.2;uc011dyi.2;uc011dyj.2;uc011dyk.2	56479;56479;56479;56479;56479;56479;56479	0;0;0;0;0;0;0
chr6	74132201	74132449	249	*	Distal Intergenic	6	74078280	74104816	26537	2	441161	uc003pgv.4	-27385	ENSG00000203907	OOEP	oocyte expressed protein	uc003pgx.1;uc003pgy.4;uc003pgz.4;uc003pha.4;uc010kav.3;uc003phb.4;uc003phc.1;uc003pgv.4;uc011dyn.1;uc003pgw.3	115004;25821;25821;25821;25821;25821;25821;441161;55510;55510	0;-39005;-39005;-39005;-39005;-39043;-39358;-27385;27916;27916
chr6	74161451	74161749	299	*	Promoter (<=1kb)	6	74134856	74162043	27188	2	115004	uc003pgx.1	294	ENSG00000164430	CGAS	cyclic GMP-AMP synthase	uc003pgx.1;uc003pgy.4;uc003pgz.4;uc003pha.4;uc010kav.3;uc003phb.4;uc003phc.1;uc010kaw.1;uc011dyn.1;uc003pgw.3	115004;25821;25821;25821;25821;25821;25821;25821;55510;55510	0;-9705;-9705;-9705;-9705;-9743;-10058;-27910;57166;57166
chr6	74162001	74162099	99	*	Promoter (<=1kb)	6	74134856	74162043	27188	2	115004	uc003pgx.1	0	ENSG00000164430	CGAS	cyclic GMP-AMP synthase	uc003pgx.1;uc003pgy.4;uc003pgz.4;uc003pha.4;uc010kav.3;uc003phb.4;uc003phc.1;uc010kaw.1;uc011dyn.1;uc003pgw.3	115004;25821;25821;25821;25821;25821;25821;25821;55510;55510	0;-9355;-9355;-9355;-9355;-9393;-9708;-27560;57716;57716
chr6	78051151	78051499	349	*	Distal Intergenic	6	78171948	78173120	1173	2	3351	uc003pil.1	121621	ENSG00000135312	HTR1B	5-hydroxytryptamine receptor 1B	NA	NA	NA
chr6	79786551	79786799	249	*	Promoter (1-2kb)	6	79644136	79788011	143876	2	55023	uc003pir.3	1212	ENSG00000146247	PHIP	pleckstrin homology domain interacting protein	uc003pir.3;uc011dyp.2	55023;55023	0;0
chr6	79787401	79788499	1099	*	Promoter (<=1kb)	6	79644136	79788011	143876	2	55023	uc003pir.3	0	ENSG00000146247	PHIP	pleckstrin homology domain interacting protein	uc003pir.3;uc011dyp.2	55023;55023	0;0
chr6	79944401	79944649	249	*	Promoter (<=1kb)	6	79910962	79944455	33494	2	9324	uc003pis.3	0	ENSG00000118418	HMGN3	high mobility group nucleosomal binding domain 3	uc003piv.2;uc003pis.3;uc003pit.3;uc003piu.2;uc021zbz.1	100288198;9324;9324;9324;9324	0;0;0;0;0
chr6	79979551	79980299	749	*	Distal Intergenic	6	79910962	79944455	33494	2	9324	uc021zbz.1	-35096	ENSG00000118418	HMGN3	high mobility group nucleosomal binding domain 3	uc003piv.2;uc003pis.3;uc003pit.3;uc003piu.2;uc021zbz.1	100288198;9324;9324;9324;9324	0;0;0;0;0
chr6	82915751	82916049	299	*	Promoter (<=1kb)	6	82879956	82915646	35691	2	25998	uc011dyu.1	-105	ENSG00000005700	IBTK	inhibitor of Bruton tyrosine kinase	uc011dyu.1;uc011dyv.1;uc011dyw.1;uc003pjl.1;uc010kbi.1;uc003pjm.2	25998;25998;25998;25998;25998;25998	-105;0;0;0;0;0
chr6	82993701	82994099	399	*	Distal Intergenic	6	82900790	82957448	56659	2	25998	uc003pjm.2	-36253	ENSG00000005700	IBTK	inhibitor of Bruton tyrosine kinase	uc011dyv.1;uc011dyw.1;uc003pjl.1;uc010kbi.1;uc003pjm.2	25998;25998;25998;25998;25998	0;0;0;0;0
chr6	84684351	84684749	399	*	Distal Intergenic	6	84743420	84800605	57186	1	112609	uc003pkg.4	-58671	ENSG00000135324	MRAP2	melanocortin 2 receptor accessory protein 2	uc003pkf.3	51167	114981
chr6	84796801	84796999	199	*	Intron (uc003pkg.4/112609, intron 3 of 3)	6	84743420	84800605	57186	1	112609	uc010kbo.3	53381	ENSG00000135324	MRAP2	melanocortin 2 receptor accessory protein 2	uc003pkg.4;uc010kbo.3;uc003pki.4;uc003pkj.4;uc010kbp.3	112609;112609;22832;22832;22832	0;0;107794;140336;140336
chr6	86353051	86353999	949	*	Promoter (<=1kb)	6	86323693	86353043	29351	2	10492	uc003pla.2	-8	ENSG00000135316	SYNCRIP	synaptotagmin binding cytoplasmic RNA interacting protein	uc003pku.3;uc003pkv.3;uc003pkw.3;uc003pkx.3;uc003pky.3;uc003pkz.2;uc003pla.2;uc003ple.2;uc003plb.4;uc003pld.4;uc011dzg.2;uc003pkr.3;uc003pks.3;uc003pkt.3;uc010kbs.1	10492;10492;10492;10492;10492;10492;10492;26799;387066;387066;57231;57231;57231;57231;692088	-1882;-8;-8;-8;-8;-1882;-8;33087;34439;34452;-49448;-49422;-49422;-49422;33378
chr6	87864551	87865249	699	*	Promoter (<=1kb)	6	87865269	87973406	108138	1	23036	uc003plm.4	-20	ENSG00000188994	ZNF292	zinc finger protein 292	uc003plk.3;uc003plm.4;uc003pll.1	23036;23036;23036	0;-20;-32
chr6	88410701	88410899	199	*	Promoter (1-2kb)	6	88384578	88411985	27408	2	55122	uc003pmk.3	1086	ENSG00000135334	AKIRIN2	akirin 2	uc011dzl.2;uc011dzm.2;uc011dzn.2;uc003pmg.3;uc003pmh.3;uc011dzo.2;uc011dzp.2;uc003pmj.1;uc003pmk.3	23595;23595;23595;23595;23595;23595;23595;23595;55122	110916;110916;110916;110916;110916;110916;110916;35229;0
chr6	88954101	88954349	249	*	Distal Intergenic	6	88849585	88875767	26183	2	1268	uc011dzt.2	-78334	ENSG00000118432	CNR1	cannabinoid receptor 1	NA	NA	NA
chr6	89779501	89779849	349	*	Distal Intergenic	6	89790429	89794879	4451	1	10957	uc003pmv.3	-10580	ENSG00000146278	PNRC1	proline rich nuclear receptor coactivator 1	uc003pmv.3;uc021zcp.1;uc003pmx.3;uc021zcq.1	10957;10957;10957;135295	0;0;-11706;47951
chr6	89791251	89791549	299	*	Promoter (<=1kb)	6	89791555	89794879	3325	1	10957	uc003pmx.3	-6	ENSG00000146278	PNRC1	proline rich nuclear receptor coactivator 1	uc003pmv.3;uc021zcp.1;uc003pmx.3;uc021zcq.1	10957;10957;10957;135295	0;0;-6;36251
chr6	90031351	90031649	299	*	Distal Intergenic	6	89966840	90025018	58179	2	2570	uc003pnb.3	-6333	ENSG00000111886	GABRR2	gamma-aminobutyric acid type A receptor subunit rho2	uc003pnb.3;uc003pnc.3;uc003pnd.4;uc010kcc.3	2570;51465;58528;58528	-6333;30970;90346;90346
chr6	90493351	90493549	199	*	Promoter (1-2kb)	6	90460669	90494845	34177	2	23195	uc003pno.1	1296	ENSG00000112159	MDN1	midasin AAA ATPase 1	uc003pnn.1;uc003pno.1;uc003pnp.1;uc003pns.2;uc003pnr.3;uc003pnt.3;uc011dzz.2	23195;23195;23195;9994;9994;9994;9994	0;0;0;-46070;-46070;-46070;-46070
chr6	97306951	97307249	299	*	Distal Intergenic	6	97241998	97285353	43356	2	81491	uc010kcl.3	-21598	ENSG00000112218	GPR63	G protein-coupled receptor 63	uc003pov.3;uc003pow.3;uc003pou.3;uc010kcl.3	29078;29078;81491;81491	37545;38518;-21598;-21598
chr6	97372201	97372649	449	*	Promoter (<=1kb)	6	97372496	97562618	190123	1	114792	uc003poy.3	0	ENSG00000186231	KLHL32	kelch like family member 32	uc003poy.3;uc003poz.2;uc010kcm.1;uc011ead.1;uc011eae.1;uc003pov.3;uc003pow.3	114792;114792;114792;114792;114792;29078;29078	0;0;0;0;0;-27407;-26434
chr6	99963751	99963999	249	*	Promoter (<=1kb)	6	99930138	99963308	33171	2	85015	uc003pqa.3	-443	ENSG00000123552	USP45	ubiquitin specific peptidase 45	uc021zde.1;uc003pqc.3;uc003ppw.2;uc003ppx.2;uc010kcq.2;uc003pqa.3;uc003pqd.3;uc003pqe.3;uc010kcr.3;uc010kcs.3;uc011eah.2;uc003pqf.3	100130890;100130890;85015;85015;85015;85015;892;892;892;892;892;892	-4871;-9941;-7093;-499;-443;-443;52691;52691;52691;52691;52691;52691
chr6	100377851	100378149	299	*	Intron (uc003pqh.1/84539, intron 5 of 5)	6	100441914	100524295	82382	1	728012	uc021zdf.1	-63765	ENSG00000229315	MCHR2-AS1	MCHR2 antisense RNA 1	uc003pqh.1;uc003pqi.1	84539;84539	0;0
chr6	102219801	102219999	199	*	Intron (uc003pqn.3/2898, intron 6 of 10)	6	101846861	102517958	671098	1	2898	uc021zdl.1	372940	ENSG00000164418	GRIK2	glutamate ionotropic receptor kainate type subunit 2	uc021zdj.1;uc003pqn.3;uc003pqo.4;uc003pqp.4;uc010kcw.3;uc021zdk.1;uc021zdl.1	2898;2898;2898;2898;2898;2898;2898	373132;0;0;0;0;0;0
chr6	104083751	104084099	349	*	Distal Intergenic	6	105175968	105233194	57227	2	57531	uc010kcx.1	1149095	ENSG00000085382	HACE1	HECT domain and ankyrin repeat containing E3 ubiquitin protein ligase 1	NA	NA	NA
chr6	106348601	106348699	99	*	Distal Intergenic	6	106534195	106557814	23620	1	639	uc003prd.2	-185496	ENSG00000057657	PRDM1	PR/SET domain 1	NA	NA	NA
chr6	106935801	106936799	999	*	Distal Intergenic	6	106959305	107018334	59030	1	202	uc003prh.3	-22506	ENSG00000112297	CRYBG1	crystallin beta-gamma domain containing 1	uc003prh.3	202	-22506
chr6	108880301	108881049	749	*	Promoter (<=1kb)	6	108881026	109005971	124946	1	2309	uc003psk.2	0	ENSG00000118689	FOXO3	forkhead box O3	uc003psk.2;uc003psm.2;uc011ean.1;uc003psj.3	2309;2309;2309;246269	0;0;0;264203
chr6	108883901	108884149	249	*	Promoter (1-2kb)	6	108882069	109005971	123903	1	2309	uc003psm.2	1832	ENSG00000118689	FOXO3	forkhead box O3	uc003psk.2;uc003psm.2;uc011ean.1;uc003psj.3	2309;2309;2309;246269	0;0;0;267803
chr6	108919401	108919899	499	*	Intron (uc003psk.2/2309, intron 2 of 3)	6	108910909	109005971	95063	1	2309	uc011ean.1	8492	ENSG00000118689	FOXO3	forkhead box O3	uc003psk.2;uc003psm.2;uc011ean.1	2309;2309;2309	0;0;0
chr6	109415651	109416299	649	*	Promoter (<=1kb)	6	109307640	109415708	108069	2	27244	uc003psu.3	0	ENSG00000080546	SESN1	sestrin 1	uc003psu.3;uc003psw.4;uc003psx.4;uc010kdk.3;uc010kdl.3;uc003psy.4	27244;285753;285753;285753;285753;285753	0;-57;-57;-57;-57;-34208
chr6	109625501	109625999	499	*	Intron (uc003ptb.1/221262, intron 3 of 4)	6	109615506	109629423	13918	1	221262	uc010kdm.1	9995	ENSG00000203799	CCDC162P	coiled-coil domain containing 162, pseudogene	uc003pta.2;uc003ptb.1;uc010kdm.1	100996634;221262;221262	67684;0;0
chr6	109702501	109702749	249	*	Promoter (1-2kb)	6	109687717	109703762	16046	2	8763	uc003ptd.3	1013	ENSG00000135535	CD164	CD164 molecule	uc003ptg.4;uc010kdp.3;uc021zdq.1;uc003ptd.3;uc003pte.3;uc003ptf.3;uc010kdn.3;uc011eap.2	285755;285755;285755;8763;8763;8763;8763;8763	59625;59625;59625;0;0;0;0;0
chr6	109702951	109704049	1099	*	Promoter (<=1kb)	6	109687717	109703762	16046	2	8763	uc003ptd.3	0	ENSG00000135535	CD164	CD164 molecule	uc003ptg.4;uc010kdp.3;uc021zdq.1;uc003ptd.3;uc003pte.3;uc003ptf.3;uc010kdn.3;uc011eap.2	285755;285755;285755;8763;8763;8763;8763;8763	58325;58325;58325;0;0;0;0;0
chr6	110500801	110501299	499	*	Promoter (<=1kb)	6	110421022	110501207	80186	2	8936	uc003ptv.1	0	ENSG00000112290	WASF1	WASP family member 1	uc003pua.3;uc003ptv.1;uc003ptw.1;uc003ptx.1;uc003pty.1;uc003ptz.1	51362;8936;8936;8936;8936;8936	-288;0;0;0;0;0
chr6	111196351	111197399	1049	*	Promoter (<=1kb)	6	111195987	111216913	20927	1	262	uc011eba.1	364	ENSG00000123505	AMD1	adenosylmethionine decarboxylase 1	uc011eay.1;uc003puk.1;uc003pul.1;uc011eaz.1;uc011eba.1	262;262;262;262;262	0;0;0;0;0
chr6	111506051	111506249	199	*	Intron (uc003pus.3/117247, intron 3 of 5)	6	111498415	111544606	46192	1	117247	uc003put.3	7636	ENSG00000112394	SLC16A10	solute carrier family 16 member 10	uc003pur.4;uc003pus.3;uc003put.3	117247;117247;117247	97270;0;0
chr6	111803951	111804799	849	*	Promoter (<=1kb)	6	111620234	111804432	184199	2	5980	uc003pux.4	0	ENSG00000009413	REV3L	REV3 like, DNA directed polymerase zeta catalytic subunit	uc003pux.4;uc003puy.4;uc003puz.4;uc021zdt.1;uc021zdu.1;uc021zdv.1	5980;5980;5980;643749;643749;643749	0;0;0;0;0;0
chr6	112972501	112972949	449	*	Distal Intergenic	6	112668532	112672498	3967	1	442247	uc003pvx.1	303969	ENSG00000251258	RFPL4B	ret finger protein like 4B	NA	NA	NA
chr6	118061901	118062149	249	*	Distal Intergenic	6	117996617	118031886	35270	1	116150	uc003pxw.3	65284	ENSG00000153989	NUS1	NUS1 dehydrodolichyl diphosphate synthase subunit	uc003pxw.3	116150	65284
chr6	118675451	118676099	649	*	Distal Intergenic	6	118822536	118824996	2461	1	23629	uc011ebk.2	-146437	NA	BRD7P3	bromodomain containing 7 pseudogene 3	uc003pxx.4	222553	446762
chr6	119301251	119301599	349	*	Exon (uc003pyj.3/79632, exon 10 of 18)	6	119280996	119297209	16214	2	79632	uc003pyi.3	-4042	ENSG00000111879	FAM184A	family with sequence similarity 184 member A	uc021zeh.1;uc003pyh.3;uc003pyi.3;uc003pyj.3;uc003pyk.4;uc003pyl.4	254394;254394;79632;79632;79632;79632	-48348;-44924;-4042;0;0;0
chr6	119458351	119458549	199	*	Intron (uc003pyk.4/79632, intron 1 of 16)	6	119280996	119470358	189363	2	79632	uc003pyk.4	11809	ENSG00000111879	FAM184A	family with sequence similarity 184 member A	uc003pym.2;uc003pyk.4;uc003pyl.4	4121;79632;79632	212382;0;0
chr6	122776451	122776549	99	*	Intron (uc003pyy.1/57515, intron 3 of 9)	6	122764493	122792952	28460	2	57515	uc003pyy.1	16403	ENSG00000111897	SERINC1	serine incorporator 1	uc003pyt.4;uc003pyu.2;uc003pyv.2;uc003pyz.3;uc031spm.1;uc031spn.1;uc003pyy.1	3298;3298;3298;5570;5570;5570;57515	55755;55755;55755;-16513;-16513;-16513;0
chr6	126111151	126111699	549	*	Promoter (<=1kb)	6	126111909	126205465	93557	1	135112	uc003qaf.3	-210	ENSG00000111912	NCOA7	nuclear receptor coactivator 7	uc003qae.4;uc010kes.3;uc003qaf.3;uc003qag.3;uc003qah.3;uc003qai.3;uc010ket.3;uc003qaj.3;uc011ebr.2;uc003qad.3	135112;135112;135112;135112;135112;135112;135112;135112;23493;23493	0;0;-210;-210;-210;-210;-210;-24665;42371;40419
chr6	128989901	128990049	149	*	Distal Intergenic	6	128642548	128841870	199323	2	5796	uc003qbm.4	-148031	ENSG00000152894	PTPRK	protein tyrosine phosphatase receptor type K	NA	NA	NA
chr6	129829051	129829299	249	*	Intron (uc003qbn.3/3908, intron 61 of 63)	6	129898240	130031370	133131	2	93663	uc003qbr.3	202071	ENSG00000146376	ARHGAP18	Rho GTPase activating protein 18	uc003qbn.3;uc003qbo.3;uc021zfb.1	3908;3908;3908	0;0;0
chr6	130815851	130816199	349	*	Distal Intergenic	6	130758262	130764210	5949	1	114801	uc003qcb.3	57589	ENSG00000164484	TMEM200A	transmembrane protein 200A	NA	NA	NA
chr6	130880351	130880599	249	*	Distal Intergenic	6	130758262	130764210	5949	1	114801	uc003qcb.3	122089	ENSG00000164484	TMEM200A	transmembrane protein 200A	NA	NA	NA
chr6	133058351	133058699	349	*	Distal Intergenic	6	133044065	133055904	11840	2	55350	uc010kfz.3	-2447	ENSG00000293493	VNN3P	vanin 3, pseudogene	uc010kgd.1;uc003qdw.1;uc011eco.1;uc010kfs.3;uc010kfu.3;uc010kfv.3;uc010kfw.3;uc010kfx.3;uc010kfy.3;uc011ecl.2;uc011ecm.2;uc011ecn.3;uc010kfz.3;uc003qds.3;uc003qdt.3;uc010kgb.3;uc031sps.1;uc031spt.1;uc003qdv.3;uc003qdn.3;uc003qdo.3	116843;116843;116843;55350;55350;55350;55350;55350;55350;55350;55350;55350;55350;8875;8875;8875;8875;8875;8875;8876;8876	0;0;0;-2520;-2447;-2447;-2447;-2447;-2447;-2447;-2447;-2447;-2447;20199;20334;20334;20334;20334;25899;-49834;-23157
chr6	133099151	133099349	199	*	Promoter (1-2kb)	6	133090507	133100543	10037	2	116843	uc010kgd.1	1194	ENSG00000146409	SLC18B1	solute carrier family 18 member B1	uc010kgd.1;uc003qdw.1;uc011eco.1;uc010kfs.3;uc010kfu.3;uc010kfv.3;uc010kfw.3;uc010kfx.3;uc010kfy.3;uc011ecl.2;uc011ecm.2;uc011ecn.3;uc010kfz.3;uc003qdy.1;uc003qdx.3;uc003qds.3;uc003qdt.3;uc010kgb.3;uc031sps.1;uc031spt.1;uc003qdv.3	116843;116843;116843;55350;55350;55350;55350;55350;55350;55350;55350;55350;55350;594839;6206;8875;8875;8875;8875;8875;8875	0;0;0;-43320;-43247;-43247;-43247;-43247;-43247;-43247;-43247;-43247;-43247;-37097;-36359;-20253;-20118;-20118;-20118;-20118;-14553
chr6	133916601	133916949	349	*	Intron (uc003qeg.1/uc003qeg.1, intron 4 of 8)	6	134142285	134175130	32846	1	154089	uc003qeh.2	-225336	NA	LINC01312	long intergenic non-protein coding RNA 1312	NA	NA	NA
chr6	134274101	134274949	849	*	Promoter (<=1kb)	6	134274301	134308638	34338	1	9519	uc003qel.3	0	ENSG00000028839	TBPL1	TATA-box binding protein like 1	uc003qem.1;uc010kgg.3;uc003qel.3	154091;9519;9519	98840;0;0
chr6	135288901	135289349	449	*	Intron (uc031spu.1/10767, intron 4 of 5)	6	135300476	135300570	95	2	100500880	uc021zfr.1	11221	ENSG00000283409	MIR3662	microRNA 3662	uc021zfr.1;uc031spu.1;uc003qey.2;uc011ecy.1;uc011ecz.1;uc003qez.2;uc011eda.1;uc003qew.3;uc003qex.3;uc010kgh.3;uc011ecx.2	100500880;10767;10767;10767;10767;10767;10767;64577;64577;64577;64577	11221;0;0;0;0;0;0;-17641;-17641;-17641;-17641
chr6	135375801	135376199	399	*	Promoter (<=1kb)	6	135281517	135376036	94520	2	10767	uc003qez.2	0	ENSG00000112339	HBS1L	HBS1 like translational GTPase	uc003qey.2;uc011ecy.1;uc011ecz.1;uc003qez.2;uc011eda.1;uc003qfa.2	10767;10767;10767;10767;10767;10767	0;0;0;0;0;0
chr6	135512901	135513049	149	*	Intron (uc003qfb.1/4602, intron 5 of 14)	6	135516886	135518461	1576	1	4602	uc003qge.1	-3837	ENSG00000118513	MYB	MYB proto-oncogene, transcription factor	uc003qfb.1;uc003qfc.3;uc003qfd.3;uc003qfe.3;uc003qff.3;uc003qfg.3;uc003qfh.3;uc003qfi.3;uc003qfj.3;uc003qfk.3;uc003qfl.3;uc003qfm.3;uc003qfn.3;uc003qfo.3;uc003qfp.3;uc003qfq.3;uc003qfr.3;uc003qfs.3;uc003qft.3;uc003qfu.3;uc003qfv.3;uc003qfw.3;uc003qfx.3;uc003qfy.3;uc003qfz.3;uc003qga.3;uc003qgb.3;uc010kgi.3;uc010kgj.3;uc010kgk.3;uc003qgc.3;uc003qgd.1;uc003qge.1	4602;4602;4602;4602;4602;4602;4602;4602;4602;4602;4602;4602;4602;4602;4602;4602;4602;4602;4602;4602;4602;4602;4602;4602;4602;4602;4602;4602;4602;4602;4602;4602;4602	0;0;0;0;0;0;0;0;0;0;0;0;0;0;0;0;0;0;0;0;0;0;0;0;0;0;0;0;0;0;0;0;-3837
chr6	135644201	135644699	499	*	Exon (uc003qgf.3/54806, exon 12 of 19)	6	135605110	135763852	158743	2	54806	uc003qgf.3	119153	ENSG00000135541	AHI1	Abelson helper integration site 1	uc003qgf.3;uc003qgg.3;uc003qgh.3;uc003qgi.3;uc003qgj.3;uc003qgk.4	54806;54806;54806;54806;54806;54806	0;0;0;0;0;0
chr6	139766651	139766949	299	*	Distal Intergenic	6	139790132	139795733	5602	2	645434	uc003qiq.1	28784	ENSG00000238099	LINC01625	long intergenic non-protein coding RNA 1625	uc003qiq.1	645434	28784
chr6	139855301	139855599	299	*	Distal Intergenic	6	139790132	139795733	5602	2	645434	uc003qiq.1	-59568	ENSG00000238099	LINC01625	long intergenic non-protein coding RNA 1625	NA	NA	NA
chr6	140227601	140227799	199	*	Distal Intergenic	6	140092210	140181608	89399	1	100132735	uc003qir.3	135391	ENSG00000231426	FILNC1	FOXO induced long non-coding RNA 1	uc003qir.3	100132735	135391
chr6	141485551	141485799	249	*	Distal Intergenic	6	141004951	141005020	70	1	100616180	uc021zge.1	480600	ENSG00000264390	MIR4465	microRNA 4465	NA	NA	NA
chr6	144112001	144112099	99	*	Intron (uc003qjq.4/9749, intron 11 of 12)	6	144164508	144184943	20436	1	84946	uc003qjs.3	-52409	ENSG00000135521	LTV1	LTV1 ribosome biogenesis factor	uc003qjq.4;uc010khh.3;uc003qjr.4;uc010khi.3	9749;9749;9749;9749	0;0;0;0
chr6	144129001	144129399	399	*	Intron (uc003qjq.4/9749, intron 12 of 12)	6	144164508	144184943	20436	1	84946	uc003qjs.3	-35109	ENSG00000135521	LTV1	LTV1 ribosome biogenesis factor	uc010khj.3;uc003qjs.3;uc003qju.1;uc003qjq.4;uc010khh.3;uc003qjr.4;uc010khi.3	153918;84946;84946;9749;9749;9749;9749	-49041;-35109;-47693;0;0;0;0
chr6	150038701	150039399	699	*	Promoter (<=1kb)	6	149979289	150039392	60104	2	9113	uc003qmu.2	0	ENSG00000131023	LATS1	large tumor suppressor kinase 1	uc003qmx.4;uc003qmz.3;uc011eef.1;uc003qna.3;uc003qnb.3;uc003qnd.3;uc003qne.3;uc003qnf.3;uc011eeg.2;uc010kif.2;uc003qmu.2;uc003qmv.2;uc003qmw.3;uc010kig.1	348995;348995;348995;5110;5110;5110;5110;5110;5110;9113;9113;9113;9113;9113	18359;28289;28289;0;0;0;0;0;0;-1140;0;-15299;0;0
chr6	150070601	150071149	549	*	Promoter (<=1kb)	6	150070831	150123667	52837	1	5110	uc003qna.3	0	ENSG00000120265	PCMT1	protein-L-isoaspartate (D-aspartate) O-methyltransferase	uc003qmx.4;uc003qmz.3;uc011eef.1;uc003qna.3;uc003qnb.3;uc003qnd.3;uc003qne.3;uc003qnf.3;uc011eeg.2;uc010kif.2;uc003qmu.2;uc003qmv.2;uc003qmw.3;uc010kig.1	348995;348995;348995;5110;5110;5110;5110;5110;5110;9113;9113;9113;9113;9113	-12843;-2913;-2913;0;0;0;0;0;0;-33040;0;-47199;0;0
chr6	151711251	151711599	349	*	Promoter (1-2kb)	6	151685250	151712677	27428	2	57621	uc003qoh.3	1078	ENSG00000181472	ZBTB2	zinc finger and BTB domain containing 2	uc011eeq.2;uc003qoi.3;uc031spy.1;uc003qoj.3;uc011eer.1;uc003qoh.3;uc011eep.2;uc003qoe.3;uc003qof.3;uc010kim.3;uc003qog.3	55005;55005;55005;55005;55005;57621;9590;9590;9590;9590;9590	54161;61717;61717;55361;55361;0;150117;149742;64585;64585;48430
chr6	154806901	154807299	399	*	Intron (uc021zhc.1/26034, intron 1 of 21)	6	154726433	154831753	105321	2	154043	uc003qpy.3	24454	ENSG00000153721	CNKSR3	CNKSR family member 3	uc003qpy.3;uc021zhc.1	154043;26034	0;0
chr6	154893801	154894149	349	*	Distal Intergenic	6	154475618	154831753	356136	2	26034	uc021zhc.1	-62048	ENSG00000074706	IPCEF1	interaction protein for cytohesin exchange factors 1	NA	NA	NA
chr6	154995201	154995399	199	*	Distal Intergenic	6	155054512	155155194	100683	1	22828	uc003qpz.3	-59113	ENSG00000213079	SCAF8	SR-related CTD associated factor 8	NA	NA	NA
chr6	155054901	155055399	499	*	Promoter (<=1kb)	6	155054981	155154519	99539	1	22828	uc010kji.3	0	ENSG00000213079	SCAF8	SR-related CTD associated factor 8	uc003qpz.3;uc003qqa.3;uc011efj.2;uc011efk.2;uc010kji.3	22828;22828;22828;22828;22828	0;0;0;0;0
chr6	155401051	155401499	449	*	Intron (uc003qqb.3/26230, intron 3 of 28)	6	155411423	155578857	167435	1	26230	uc003qqe.3	-9924	ENSG00000146426	TIAM2	TIAM Rac1 associated GEF 2	uc003qqb.3;uc003qqe.3	26230;26230	0;-9924
chr6	155629501	155629799	299	*	Intron (uc003qqj.4/51106, intron 2 of 6)	6	155577264	155635617	58354	2	51106	uc003qqj.4	5818	ENSG00000029639	TFB1M	transcription factor B1, mitochondrial	uc003qql.2;uc003qqj.4;uc003qqk.3	49861;51106;51106	44354;0;0
chr6	157098201	157098549	349	*	Promoter (<=1kb)	6	157099064	157531913	432850	1	57492	uc003qqn.3	-515	ENSG00000049618	ARID1B	AT-rich interaction domain 1B	uc021zhj.1;uc003qqn.3;uc003qqo.3;uc003qqp.3	100616154;57492;57492;57492	2316;0;0;0
chr6	157099351	157099399	49	*	Promoter (<=1kb)	6	157099064	157531913	432850	1	57492	uc003qqp.3	287	ENSG00000049618	ARID1B	AT-rich interaction domain 1B	uc021zhj.1;uc003qqn.3;uc003qqo.3;uc003qqp.3	100616154;57492;57492;57492	1466;0;0;0
chr6	157814101	157814499	399	*	Intron (uc003qqs.3/79683, intron 1 of 8)	6	157802557	158094977	292421	1	79683	uc003qqt.3	11544	ENSG00000175048	ZDHHC14	zinc finger DHHC-type palmitoyltransferase 14	uc003qqs.3;uc003qqt.3	79683;79683	0;0
chr6	157880551	157880699	149	*	Intron (uc003qqs.3/79683, intron 1 of 8)	6	157950164	157950232	69	1	100500899	uc021zhk.1	-69465	ENSG00000266617	MIR3692	microRNA 3692	uc003qqs.3;uc003qqt.3	79683;79683	0;0
chr6	157882401	157882899	499	*	Intron (uc003qqs.3/79683, intron 1 of 8)	6	157950164	157950232	69	1	100500899	uc021zhk.1	-67265	ENSG00000266617	MIR3692	microRNA 3692	uc003qqs.3;uc003qqt.3	79683;79683	0;0
chr6	157909601	157909999	399	*	Intron (uc003qqs.3/79683, intron 1 of 8)	6	157950164	157950232	69	1	100500899	uc021zhk.1	-40165	ENSG00000266617	MIR3692	microRNA 3692	uc021zhk.1;uc003qqs.3;uc003qqt.3	100500899;79683;79683	-40165;0;0
chr6	157936101	157936349	249	*	Intron (uc003qqs.3/79683, intron 1 of 8)	6	157950164	157950232	69	1	100500899	uc021zhk.1	-13815	ENSG00000266617	MIR3692	microRNA 3692	uc021zhk.1;uc003qqs.3;uc003qqt.3;uc010kjm.1	100500899;79683;79683;79683	-13815;0;0;-27268
chr6	158117751	158117899	149	*	Distal Intergenic	6	158066769	158094977	28209	1	79683	uc010kjn.3	50982	ENSG00000175048	ZDHHC14	zinc finger DHHC-type palmitoyltransferase 14	uc003qqs.3;uc003qqt.3;uc010kjn.3	79683;79683;79683	0;0;50982
chr6	158239801	158240099	299	*	Distal Intergenic	6	158244294	158366109	121816	1	51429	uc003qqv.1	-4195	ENSG00000130340	SNX9	sorting nexin 9	uc003qqv.1	51429	0
chr6	158244251	158245199	949	*	Promoter (<=1kb)	6	158244294	158366109	121816	1	51429	uc003qqv.1	0	ENSG00000130340	SNX9	sorting nexin 9	uc003qqv.1	51429	0
chr6	159183751	159184449	699	*	Promoter (1-2kb)	6	159185693	159185785	93	2	100500851	uc021zho.1	1336	ENSG00000265558	MIR3918	microRNA 3918	uc021zho.1;uc011efr.2;uc003qrt.4;uc011efs.2;uc003qru.4;uc003qro.3;uc003qrp.3;uc003qrr.3;uc003qrs.3;uc011efq.2	100500851;7430;7430;7430;7430;94120;94120;94120;94120;94120	1336;6555;0;0;0;0;0;0;0;0
chr6	159238351	159238599	249	*	Promoter (<=1kb)	6	159239011	159243272	4262	1	101409257	uc031sqs.1	-412	ENSG00000233893	EZR-AS1	EZR antisense RNA 1	uc031sqs.1;uc003qrw.4;uc011efr.2;uc003qrt.4;uc011efs.2;uc003qru.4	101409257;202459;7430;7430;7430;7430	-412;0;-47347;0;0;0
chr6	159274251	159274649	399	*	Intron (uc003qrw.4/202459, intron 2 of 2)	6	159262158	159278664	16507	2	202459	uc003qrw.4	4015	ENSG00000293101	OSTCP1	oligosaccharyltransferase complex subunit pseudogene 1	uc021zhp.1;uc031sqs.1;uc003qrw.4;uc003qrt.4;uc011efs.2;uc003qru.4	100130967;101409257;202459;7430;7430;7430	-34970;35240;0;0;0;0
chr6	159290401	159290849	449	*	Distal Intergenic	6	159262158	159278664	16507	2	202459	uc003qrw.4	-11737	ENSG00000293101	OSTCP1	oligosaccharyltransferase complex subunit pseudogene 1	uc021zhp.1;uc031sqs.1;uc003qrw.4;uc003qru.4	100130967;101409257;202459;7430	-18770;51390;0;0
chr6	160114151	160114849	699	*	Promoter (<=1kb)	6	160100149	160114353	14205	2	6648	uc003qsg.3	0	ENSG00000291237	SOD2	superoxide dismutase 2	uc003qsg.3;uc003qsh.3;uc003qsi.1;uc011efu.1;uc011efv.1;uc003qsj.3;uc003qsk.4;uc031sqt.1;uc003qsl.4;uc010kjx.3;uc003qsn.4;uc031squ.1;uc031sqv.1	6648;6648;6648;6648;6648;6648;9589;9589;9589;9589;9589;9589;9589	0;0;0;0;0;0;-33181;-33181;-33181;-33280;-33683;-33683;-33683
chr6	160992301	160992699	399	*	Intron (uc003qtl.3/4018, intron 29 of 39)	6	160888218	160932156	43939	2	80350	uc011efy.2	-60145	ENSG00000290613	LPAL2	lipoprotein(a) like 2 (pseudogene)	uc003qtl.3	4018	0
chr6	161039451	161039699	249	*	Exon (uc003qtl.3/4018, exon 14 of 40)	6	160952515	161087407	134893	2	4018	uc003qtl.3	47708	ENSG00000198670	LPA	lipoprotein(a)	uc003qtl.3	4018	0
chr6	161059151	161059799	649	*	Intron (uc003qtl.3/4018, intron 7 of 39)	6	160952515	161087407	134893	2	4018	uc003qtl.3	27608	ENSG00000198670	LPA	lipoprotein(a)	uc003qtl.3	4018	0
chr6	161059901	161060249	349	*	Intron (uc003qtl.3/4018, intron 7 of 39)	6	160952515	161087407	134893	2	4018	uc003qtl.3	27158	ENSG00000198670	LPA	lipoprotein(a)	uc003qtl.3	4018	0
chr6	161062251	161062549	299	*	Intron (uc003qtl.3/4018, intron 5 of 39)	6	160952515	161087407	134893	2	4018	uc003qtl.3	24858	ENSG00000198670	LPA	lipoprotein(a)	uc003qtl.3	4018	0
chr6	161066901	161067149	249	*	Intron (uc003qtl.3/4018, intron 4 of 39)	6	160952515	161087407	134893	2	4018	uc003qtl.3	20258	ENSG00000198670	LPA	lipoprotein(a)	uc003qtl.3	4018	0
chr6	164198351	164198599	249	*	Distal Intergenic	6	163835675	163999628	163954	1	9444	uc003quj.3	362676	ENSG00000112531	QKI	QKI, KH domain containing RNA binding	NA	NA	NA
[truncated: 5,967 more rows]

## Sheet: KMT2D_GATA1_colocalized region
Supplemental Table 8: Integration analysis of ChIP-seq data for GATA1, H3K4me1, H3K27ac and KMT2D.
[truncated: 2,560 more rows]

[truncated: 3 more sheets: Reoproducible_Motif, Enhancer_Motif, Promoter_Motif]
