# Supplementary material for: The H3K4 methyltransferase KMT2D is an essential cofactor for GATA1 at erythroid gene enhancers
Source: Research Square preprint supplement (doi:10.21203/rs.3.rs-7853319/v1), 2025-10-22
Supplement: Supplementary file 1 [file 4843792cd54fda64156dcaf2.pdf]

## **Supplemental Figure Legends**

### **Supplemental Figure 1. An unbiased CRISPR/Cas9 screen for epigenetic regulators identifies KMT2D as a critical regulator of erythropoiesis.**

**(A).** Gene ontology analysis of the biological process of all significant positive regulators identified in the screen. The relative P value was calculated from the enrichR online software.

**(B).** KMT2D mRNA levels detected by RT-qPCR at different stages after induced erythroid maturation of CD34<sup>+</sup> HPSCs.

**(C).** CCK8 assay displaying the proliferation status of HUDEP-2 cells treated with KMT2D-sg1, KMT2D-sg2 and Ctrl. sgRNAs and cultured in maintenance medium over a time course of 5 days. n.s., not significant, unpaired Student's t-test.

**(D).** Bar plot displaying the indel frequency obtained from two different KMT2D sgRNAs at day 0 and day 6 of differentiation. n.s. not significant, unpaired Student's t-test.

**(E).** Quantitative flow cytometry analysis of HUDEP-2 cells treated with Ctrl, KMT2D-sg1, and KMT2D-sg2 sgRNAs and stained for the erythroid differentiation marker CD235a. \*\*P < 0.01, unpaired Student's t-test.

**Supplemental Figure 2. KMT2D is required for activation of erythroid signature genes and proper chromatin accessibility of GATA1.**

**(A).** Principal component analysis of RNA-seq data from non-targeting sgRNA control (Ctrl) and KMT2D-sgRNA2 mediated bulk knockout (KMT2D KO) HUDEP-2 cells before (day 0) and after three days of maturation (day 3).

**(B).** Gene set enrichment analysis (GSEA) of RNA-seq data from KMT2D KO versus control HUDEP-2 cells before (day 0) and after three days of maturation (day 3).

**(C).** Gene ontology analysis of the biological process from the downregulated genes of **Figure 2B** before (day 0) and after three days of maturation (day 3). The relative P value was calculated from the enrichR online software.

**(D).** TF enrichment analysis of the downregulated genes of **Figure 2B** before (day 0) and after three days of maturation (day 3). The relative P value was calculated from the enrichR online software.

**(E).** Heatmap centered at ATAC-seq nucleosome-free peak summits for 119 increased regions and 659 decreased regions from non-targeting sgRNA control (Ctrl) and KMT2D-sgRNA2 mediated bulk knockout (KMT2D KO) in undifferentiated HUDEP-2 cells.

**(F).** Volcano plot of motif enrichment analysis of ATAC-seq comparisons: unchanged control regions versus decreased regions in the HUDEP-2 cells. The *P* values and odds ratios were calculated via Fisher's exact tests to compare the frequency of regions containing a motif with those that do not. Each dot represents a motif in the database.

**(G).** Homer motif enrichment analysis of the top 10 TF motifs at ATAC down regions. P values, hypergeometric test.

**Supplemental Figure 3. Acute depletion of KMT2D selectively suppresses the expression of GATA1 targets.**

**(A).** Schematic diagram of the knock-in design and genotyping PCR primer design for the KMT2D<sup>AID2</sup> reporter allele.

**(B).** Genotyping PCR confirming the successful integration of the EGFP-AID cassette into the endogenous KMT2D locus for two K562 cell clones and one HUDEP-2 cell clone. PCR products from the 5' and 3' knock-in boundaries were sequenced to verify the seamless knock-in of the EGFP-AID cassette.

**(C).** Flow cytometry analysis of AID-KMT2D K562 cells following 1  $\mu$ M 5-Ph-IAA treatment. The fluorescence of EGFP-AID-KMT2D was detected before 5-Ph-IAA treatment (black histogram), after 8 hours of 5-Ph-IAA treatment (red histogram) and following washout of 5-Ph-IAA after 48 hours (blue histogram).

**(D).** Western blot showing KMT2D, KDM6A (UTX) and H3 protein expression in nuclear extracts of AID-KMT2D K562 cells before treatment with 5-Ph-IAA, after treatment with 5-Ph-IAA for 8 hours and following washout of 5-Ph-IAA after 48 hours.

**(E).** Immunoprecipitation-mass spectrometry (IP-MASS) data of KMT2D immunoprecipitations (IPs) from nuclear extracts of AID-KMT2D K562 cells identifies all members of the KMT2D complex. KMT2D IPs were normalized to control IgG IPs.

**(F).** Interaction Network Analysis of IP-MS data performed on KMT2D relative to IgG IPs from nuclear extracts of AID-KMT2D K562 cells.

**(G).** Schematic diagram of the experimental process for inducing erythroid differentiation of AID-KMT2D HUDEP2 cells.

**(H).** Proliferation assay of AID-KMT2D HUDEP2 cells after six days of induced erythroid expansion. AID-KMT2D HUDEP2 cells were treated with either DMSO or 5-Ph-IAA. n.s., not significant, unpaired Student's t-test.

**(I).** Proliferation assay of AID-KMT2D HUDEP2 cells after six days of induced erythroid maturation. AID-KMT2D HUDEP2 cells were treated with either DMSO or 5-Ph-IAA (upper panel); cell pellets of AID-KMT2D HUDEP-2 cells at day 6 of induced erythroid maturation treated with either DMSO or 5-Ph-IAA (lower panel). n.s., not significant, unpaired Student's t-test.

**(J).** RT-qPCR showing mRNA levels of *SLC4A1*, *GYPA*, *HBA*, and *HBB* normalized to  $\beta$ -Actin in AID-KMT2D HUDEP2 cells at day 3 and day 6 of induced erythroid maturation treated either with DMSO or 5-Ph-IAA. \*\*\*\*P < 0.0001, unpaired Student's t-test.

**(K).** Principal component analysis of RNA-seq data from AID-KMT2D HUDEP-2 and K562 cells treated with 5-Ph-IAA for 0, 6, 12, or 24 hours.

**Supplemental Figure 4. KMT2D and GATA1 co-occupy erythroid-expressed genes.**

**(A).** Principal component analysis from KMT2D ChIP-seq of AID-KMT2D HUDEP-2 cells treated with or without 1  $\mu$ M 5-Ph-IAA for 24 hours.

**(B).** Genomic heatmaps of KMT2D peaks from three replicates centered on the summit of KMT2D bound regions in AID-KMT2D HUDEP-2 cells untreated or treated with 5-Ph-IAA for 24 hours.

**(C).** Homer motif enrichment analysis of the top 10 TF motifs at KMT2D bound enhancers and promoters. P values, hypergeometric test.

**(D).** Co-immunoprecipitation using MYC<sup>Tag</sup> in K562-MYC<sup>Tag</sup>-GATA1 overexpression cells, followed by Western blot detection of proteins interacting with GATA1, including KDM6A (UTX) and KMT2D.

**(E).** Co-immunoprecipitation using GATA1 antibody in K562 cells, followed by Western blot detection of GATA1, KDM6A (UTX), and KMT2D protein levels.

**(F).** Box plots show the basal expression levels of genes linked to KMT2D unbound Down DEGs and KMT2D bound Down DEGs from **Figure 4H** in HUDEP-2 cells and in CD34<sup>+</sup> HSPCs undergoing erythroid induction. \*\*\*\* P < 0.0001 according to the Wilcoxon test.

**Supplemental Figure 5. KMT2D is required for enhancer activation of select GATA1 target genes.**

**(A).** Gene ontology analysis of the enriched biological processes from KMT2D-dependent active enhancers and KMT2D-independent active enhancers in HUDEP-2 cells. The relative *FDR* value was calculated via the GREAT database.

**(B).** Homer motif enrichment analysis of the top 10 TF motifs at KMT2D-dependent active enhancers and KMT2D-independent active enhancers. P values, hypergeometric test.

**(C).** Genome browser tracks of the *SLC4A1* loci. Displayed are the ChIP-seq profiles of H3K4me1, H3K27ac, and GATA1 in the non-targeting sgRNA control (Ctrl) and KMT2D-sg2 mediated knockout (KO) HUDEP-2 cells and KMT2D signal in AID-KMT2D HUDEP-2 cells untreated with 5-Ph-IAA. The grey rectangles highlight the three active enhancer regions (S1, S2, S3), respectively.

**(D).** RT-qPCR verifying the relative fold enrichment of H3K4me1 and H3K27ac signal on three active enhancer regions (S1, S2, S3) of *SLC4A1* loci by CUT&RUN assay in in AID-KMT2D HUDEP-2 cells before and after treated with 5-Ph-IAA for 24 hours. \*\*\*\*P < 0.0001, unpaired Student's t-test.

**(E).** RT-qPCR verifying the relative fold enrichment of GATA1 signal on three example genes *SLC4A1*, *ZFPM1*, and *EPOR* loci by CUT&RUN assay in in AID-KMT2D HUDEP-2 cells before and after treated with 5-Ph-IAA for 24 hours. n.s. not significant, unpaired Student's t-test.

**Supplemental Figure 6. KMT2D is required for the survival and maturation of primary human erythroblasts.**

**(A).** Representative flow cytometry plots of CD34<sup>+</sup> HSPCs electroporated with RNPs consisting of Cas9 and either non-targeting control (Ctrl) or KMT2D (KMT2D-sg2) sgRNAs and stained for CD34 over seven days expansion in maintenance medium.

**(B).** Representative flow cytometry plots and analysis of CD34<sup>+</sup> HSPCs electroporated with RNPs consisting of Cas9 and either non-targeting control (Ctrl) or KMT2D (KMT2D-sg2) sgRNAs and stained for apoptosis. n.s not significant, unpaired Student's t-test.

**(C).** Cell counting assay showing the proliferation ability of CD34<sup>+</sup> HSPCs treated with RNPs consisting of Cas9 and either non-targeting control (Ctrl) or KMT2D (KMT2D-sg2) sgRNAs in myeloid differentiation medium (left panel). Indel efficiency of CD34<sup>+</sup> HSPCs edited at various time points of induced myeloid maturation (right right). \*\*P < 0.01, \*\*\*P < 0.001, unpaired Student's t-test for the growth curve while paired Student's t-test for the indels.

**(D).** Representative flow cytometry plots and analysis of CD34<sup>+</sup> HSPCs and stained for CD11b after fourteen days of myeloid differentiation. \*P < 0.05, unpaired Student's t-test.

**(E).** RT-qPCR from CD34<sup>+</sup> HSPCs treated with luciferase control (Ctrl) and KMT2D (KMT2D-sh1 and KMT2D-sh2) shRNAs showing *KMT2D* mRNA expression levels normalized to  $\beta$ -Actin after seven days of induced maturation. Data are shown as the mean  $\pm$  SEM of three replicates. \*\*P < 0.01, \*\*\*P < 0.001, unpaired Student's t-test.

**(F).** Colony formation ability of CD34<sup>+</sup> HSPCs after lentiviral transduction with shRNAs against luciferase (Ctrl) or KMT2D (KMT2D-sh1 and KMT2D-sh2). \*P < 0.05, \*\*P < 0.01, unpaired Student's t-test.

**(G).** Representative flow cytometry plots showing CD235a, CD49d and Band3 expression at the indicated time points after induced erythroid maturation of CD34<sup>+</sup> HSPCs transduced with lentiviral shRNAs against luciferase (Ctrl) and KMT2D (KMT2D-sh1 and KMT2D-sh2). \*\*P < 0.01, \*\*\*P < 0.001, unpaired Student's t-test.

**(H).** May-Grünwald-Giemsa-stained erythroblasts at day 14 after induced erythroid maturation of CD34<sup>+</sup> HSPCs treated with shRNAs against luciferase (Ctrl) or KMT2D (KMT2D-sh1 and KMT2D-sh2). Red arrows denote immature erythroblasts. Scale bar, 10  $\mu$ M.

**(I).** Cell pellets at day 10 of induced erythroid maturation after lentiviral transduction with sRNAs against luciferase (Ctrl) or KMT2D (KMT2D-sh1 and KMT2D-sh2).

### **Supplemental Table Legends (separate files)**

**Supplemental Table 1:** Analysis of CRISPR screen using single-guide (sg) RNAs targeting epigenetic modifiers.

**Supplemental Table 2:** RNA transcriptome and ATAC-seq analysis of wild type and KMT2D-sgRNA2 mediated knockout (KMT2D KO) HUDEP-2 cells.

**Supplemental Table 3:** Gene Ontology analysis and Transcription factors occupancy analysis for the de-regulated genes between wild type and KMT2D-sgRNA2 mediated knockout (KMT2D KO) HUDEP-2 cells.

**Supplemental Table 4:** KMT2D interacting proteins list by the Immunoprecipitation mass spectrometry (IP-Mass) in AID-KMT2D K562 cells.

**Supplemental Table 5:** The RNA transcriptome analysis of AID-KMT2D HUDEP-2 cells with 5-Ph-IAA treatment for 6 hours, 12 hours and 24 hours vs. without 5-Ph-IAA treatment grown in the expansion culture.

**Supplemental Table 6:** RNA transcriptome analysis of AID-KMT2D K562 cells with 5-Ph-IAA treatment for 6 hours, 12 hours and 24 hours vs. without 5-Ph-IAA treatment grown in the expansion culture.

**Supplemental Table 7:** Transcription factors occupancy analysis for the de-regulated genes in AID-KMT2D K562 and HUDEP-2 cells with time serial analysis.

**Supplemental Table 8:** Integration analysis of ChIP-seq data for GATA1, H3K4me1, H3K27ac and KMT2D.

**Supplemental Table 9:** Table S9, Integration analysis of all ChIP-seq data for KMT2D, GATA1, H3K4me1, H3K27ac.

**Supplemental Table 10:** Oligonucleotides, DNA primers, and antibodies used in this study. Oligonucleotides were used for sgRNA vector construction; DNA primers were



used for the analysis of Cas9-mediated indels by Sanger sequencing; antibodies were used for Western blotting, immunoprecipitation.
