# Supplementary material for: The H3K4 methyltransferase KMT2D is an essential cofactor for GATA1 at erythroid gene enhancers
Source: Research Square preprint supplement (doi:10.21203/rs.3.rs-7853319/v1), 2025-10-22
Supplement: Supplementary file 2 [file 28ddfecf7a580fc638c1f647.xlsx]

## Sheet: KOvsWT D0
Supplemental Table 2: RNA transcriptome and ATAC-seq analysis of wild type and KMT2D-sgRNA2 mediated knockout (KMT2D KO) HUDEP-2 cells.
gene	logFC	AveExpr	t	P.Value	adj.P.Val	B	PXU010_log2CPM	PXU011_log2CPM	PXU012_log2CPM	PXU013_log2CPM	PXU014_log2CPM	PXU015_log2CPM
MARCH2	-0.3465	4.6314	-4.0058	0.0025747	0.02679	-2.3739	4.8524	4.8974	4.4986	4.4117	4.4203	4.708
MARCH3	-0.3388	3.4897	-3.5852	0.005095	0.042619	-2.7801	3.5505	3.4417	3.7452	3.7902	3.1105	3.3002
MARCH5	0.0011948	5.1381	0.021563	0.98323	0.99359	-7.684	5.1779	5.1548	5.0968	5.062	5.1744	5.1626
MARCH6	-0.077231	7.0552	-1.7845	0.10515	0.30923	-6.4222	7.0778	7.0729	7.1023	7.0867	7.0155	6.9759
MARCH7	0.081494	7.0765	1.8552	0.093721	0.28819	-6.3227	7.0616	7.0446	7.0436	7.0457	7.1599	7.1038
MARCH8	0.17411	6.608	3.7929	0.0036278	0.033853	-3.0241	6.5378	6.5599	6.5568	6.5429	6.6996	6.7511
MARCH9	0.027306	2.0417	0.20954	0.8383	0.9294	-6.8704	1.8442	2.0156	2.266	2.2152	1.8838	2.0256
SEPT1	0.1307	-2.5055	0.19273	0.85109	0.93628	-5.6314	-3.1638	-1.6954	-2.4699	-3.2472	-3.1132	-1.3437
SEPT2	0.061395	8.3756	1.503	0.16422	0.40327	-6.9498	8.3914	8.3876	8.3102	8.2695	8.4799	8.415
SEPT5	-1.4722	0.066953	-4.3272	0.0015521	0.018725	-0.822	0.49697	0.42006	0.31297	1.0007	-1.1374	-0.69158
SEPT6	0.85086	-0.95795	2.4651	0.033738	0.15314	-3.5812	-1.2739	-1.8398	-0.4913	-0.92525	-0.61069	-0.60669
SEPT7	0.111	7.6774	2.3933	0.038113	0.16578	-5.5191	7.6264	7.6043	7.7317	7.6551	7.7589	7.6878
SEPT8	0.12674	7.7101	2.927	0.015362	0.091765	-4.611	7.5944	7.5733	7.8292	7.8315	7.6789	7.7532
SEPT9	0.062964	1.8878	0.38038	0.71174	0.86488	-6.7825	1.6587	1.8723	1.9934	2.0449	1.6417	2.1158
SEPT10	-1.2128	-3.3365	-1.3949	0.19373	0.44099	-4.5764	-3.5508	-2.3873	-2.1651	-2.6192	-3.5607	-5.736
SEPT11	0.037674	7.657	0.8272	0.42772	0.67722	-7.641	7.6996	7.6656	7.5966	7.5455	7.7576	7.677
SEPT15	0.22801	6.7288	3.3877	0.0070675	0.053413	-3.7285	6.6659	6.6289	6.7125	6.6411	6.9705	6.7541
A1BG-AS1	1.8342	-1.1203	4.2452	0.0017638	0.020387	-0.94454	-2.6074	-1.6954	-0.53502	-1.152	-0.61069	-0.12127
A2M	2.0282	-4.243	3.1427	0.010659	0.071399	-2.5895	-4.4439	-3.7658	-6.5574	-6.7066	-2.4965	-1.488
A4GALT	-1.1304	5.5073	-11.925	3.5913e-07	4.936e-05	6.9836	5.9323	5.9767	5.7387	5.6545	4.6808	5.0609
AAAS	-0.24684	5.7988	-3.159	0.010371	0.070235	-4.0001	5.931	5.887	5.8185	5.7673	5.5566	5.8325
AACS	0.11246	5.8378	1.8998	0.087121	0.27629	-6.095	5.6723	5.7899	5.9737	5.9402	5.8658	5.7851
AADAT	0.36736	1.5183	2.4793	0.032929	0.15063	-4.2	1.4936	1.2786	1.3674	1.4583	1.8472	1.6649
AAED1	0.14548	4.7313	2.2627	0.047551	0.18975	-5.3506	4.7271	4.6928	4.6563	4.5713	4.8297	4.9106
AAGAB	0.073125	6.4989	1.575	0.14682	0.3766	-6.6725	6.5171	6.5577	6.3691	6.3386	6.6216	6.589
AAK1	0.12398	4.6609	1.9026	0.086716	0.27558	-5.8935	4.5646	4.6291	4.71	4.657	4.7411	4.6638
AAMDC	0.05644	2.2164	0.46238	0.65386	0.83271	-6.8675	2.202	2.2206	2.0536	2.233	2.2111	2.3778
AAMP	-0.082694	6.6951	-1.408	0.18993	0.43624	-6.9148	6.7924	6.763	6.6577	6.5441	6.64	6.7736
AAR2	-0.072522	5.0591	-1.0737	0.30858	0.56991	-7.0709	5.1033	5.1405	5.0578	4.9323	5.0012	5.1197
AARS	-0.014206	7.3236	-0.26368	0.79747	0.90897	-7.9351	7.4032	7.3514	7.2659	7.2062	7.426	7.2886
AARS2	-0.058375	6.3545	-0.88091	0.39937	0.65224	-7.4552	6.4191	6.3817	6.2922	6.3086	6.2541	6.4713
AARSD1	0.25816	0.78608	1.304	0.2219	0.47495	-5.7105	0.53668	0.85478	0.68101	0.93001	0.97427	0.73976
AASDH	0.07251	4.5762	1.1633	0.27214	0.53369	-6.8753	4.5452	4.5516	4.5712	4.5654	4.6412	4.5826
AASDHPPT	-0.081692	6.6431	-1.8118	0.10059	0.30126	-6.3466	6.7501	6.7497	6.4981	6.5172	6.6487	6.6947
AASS	0.23293	4.3951	3.2097	0.0095218	0.066012	-3.657	4.2511	4.1965	4.5228	4.4387	4.4223	4.539
AATF	-0.11644	6.6191	-2.262	0.047611	0.18995	-5.6319	6.7315	6.6782	6.5957	6.5151	6.5624	6.6317
AB015752.3	-0.45761	-1.7644	-0.98413	0.34862	0.60867	-5.3157	-1.9658	-1.0433	-1.4281	-1.9517	-2.1621	-2.0355
AB019441.29	0.25061	1.8553	1.6493	0.13058	0.35142	-5.5591	1.7794	1.5776	1.7509	2.0247	1.8958	2.1032
ABAT	0.24658	1.6301	1.6163	0.13759	0.36223	-5.5235	1.507	1.261	1.8392	1.7569	1.6056	1.8109
ABCA1	0.97527	-1.9855	1.6212	0.13652	0.36053	-4.5517	-3.5508	-1.6954	-1.1998	-1.7524	-2.0659	-1.6485
ABCA11P	0.78909	-1.3509	2.1589	0.056641	0.21129	-3.9585	-2.0418	-1.6954	-1.0028	-0.97869	-1.0428	-1.3437
ABCA17P	-0.062236	4.508	-0.79733	0.44407	0.69064	-7.2138	4.4617	4.5714	4.536	4.5419	4.3728	4.5644
ABCA2	0.69318	2.6242	4.9291	0.00062525	0.0095238	-0.37519	1.8858	2.1459	3.1238	3.1404	2.5592	2.8897
ABCA3	-0.12775	0.59408	-0.57311	0.57942	0.78816	-6.2631	0.66166	0.17905	1.0499	0.97287	0.41455	0.28639
ABCA5	-0.011373	1.5852	-0.076313	0.9407	0.97461	-6.7841	1.5848	1.6334	1.6762	1.5366	1.6769	1.4036
ABCA7	-0.72627	6.5261	-12.059	3.2376e-07	4.6854e-05	6.9764	6.7487	6.8126	6.7203	6.7419	5.9804	6.1524
ABCB10	-0.4053	8.117	-9.3663	3.2404e-06	0.00020968	4.3452	8.3284	8.3291	8.1442	8.0556	7.9315	7.9132
ABCB10P1	-0.51786	1.4054	-3.252	0.0088686	0.062821	-2.8552	1.7516	1.647	1.2818	1.4583	1.2883	1.0055
ABCB10P3	-0.29916	-0.25597	-1.1268	0.28655	0.548	-5.5964	-0.13229	-0.30638	-0.25361	-0.077257	-0.64504	-0.12127
ABCB10P4	-0.12671	1.0316	-0.76143	0.46425	0.70553	-6.3496	1.1624	1.1507	0.79134	0.91544	0.93992	1.2298
ABCB6	-0.70073	1.0561	-3.8623	0.003242	0.03155	-1.7688	1.5003	1.296	0.87724	1.0813	0.63097	0.95053
ABCB7	-0.11045	5.8285	-1.6406	0.1324	0.3543	-6.4808	5.8987	5.85	5.9277	5.789	5.8256	5.6803
ABCB8	-0.27091	6.1387	-3.6381	0.0046705	0.039985	-3.2287	6.2683	6.3246	6.1064	6.0422	5.9178	6.1728
ABCB9	-0.24746	2.0669	-1.7744	0.10686	0.31214	-5.4096	2.0864	2.1837	2.2912	2.2152	1.9771	1.6477
ABCC1	-0.012131	5.68	-0.22189	0.82894	0.92516	-7.7403	5.6502	5.6875	5.7444	5.6784	5.6298	5.6898
ABCC10	-0.084101	5.6892	-0.90006	0.38958	0.64378	-7.3475	5.6693	5.8367	5.6172	5.6352	5.5275	5.8495
ABCC11	0.3162	-2.9507	0.55121	0.59378	0.79826	-5.3767	-3.0033	-2.9178	-3.098	-3.0062	-2.2652	-3.414
ABCC2	-0.040553	-1.8427	-0.088808	0.93102	0.97147	-5.7584	-1.6966	-1.8398	-1.6994	-1.8486	-1.4054	-2.5661
ABCC4	-0.16781	7.5716	-4.1489	0.0020519	0.022639	-2.5209	7.664	7.6462	7.5726	7.5725	7.4958	7.4785
ABCC5	-0.37915	7.201	-8.483	7.7839e-06	0.00039406	3.4798	7.3838	7.3551	7.2097	7.2709	6.9832	7.0032
ABCC6P2	2.3796	-2.3768	3.6794	0.0043648	0.038349	-1.8169	-3.1638	-3.7658	-3.75	-1.7524	-1.1374	-0.69158
ABCD1	-0.22996	0.33353	-0.88798	0.39573	0.6487	-6.016	0.31102	0.51218	0.54064	0.087802	-0.054299	0.60387
ABCD3	0.017805	6.0953	0.36318	0.72414	0.87092	-7.7647	6.1152	6.1688	5.9708	6.0023	6.1487	6.166
ABCD4	0.063035	4.3711	0.87904	0.40033	0.65309	-7.111	4.3086	4.2775	4.4698	4.4117	4.3136	4.4452
ABCE1	-0.14335	8.5128	-3.7644	0.0037997	0.034798	-3.2542	8.6671	8.6336	8.3953	8.3634	8.5089	8.5083
ABCF1	-0.060629	7.7658	-1.3806	0.19795	0.44607	-7.0579	7.8907	7.8243	7.6534	7.6321	7.8247	7.7695
ABCF2	-0.19096	7.2082	-4.4053	0.0013755	0.017235	-2.0741	7.3893	7.4062	7.0505	6.9913	7.2064	7.2053
ABCF2P1	1.1828	-3.4915	1.1227	0.2882	0.54925	-4.8076	-3.1638	-6.0877	-3.098	-1.9517	-2.4965	-4.151
ABCF3	0.030901	5.5269	0.56943	0.58183	0.78988	-7.5746	5.5176	5.5709	5.4702	5.4761	5.5953	5.5314
ABCG2	-0.26497	2.4614	-1.7296	0.11487	0.32545	-5.6488	2.6238	2.7609	2.2141	2.1607	2.2255	2.7837
ABHD1	-0.47754	-2.4356	-0.69938	0.5005	0.73448	-5.3827	-1.825	-2.1808	-2.4699	-2.4587	-1.5282	-4.151
ABHD10	0.089224	5.5461	1.3677	0.20182	0.45123	-6.8039	5.5414	5.4146	5.5625	5.6251	5.6231	5.5102
ABHD11	-0.47176	4.371	-5.2398	0.00039906	0.006957	-0.34975	4.6371	4.6427	4.3607	4.1768	4.0825	4.3261
ABHD12	-0.072891	4.3745	-0.81645	0.43356	0.6816	-7.1806	4.4322	4.4151	4.2857	4.3206	4.2473	4.546
ABHD13	0.031209	4.4623	0.43372	0.67385	0.84391	-7.4603	4.519	4.557	4.3291	4.287	4.6242	4.4576
ABHD14A	0.24222	1.9769	1.7801	0.10589	0.31043	-5.4258	1.9061	1.8953	2.001	1.7155	2.0963	2.247
ABHD14B	-0.012295	5.1401	-0.20399	0.84252	0.93164	-7.6586	5.1208	5.1913	5.1172	5.1156	5.1018	5.194
ABHD15	0.78033	2.5914	5.9128	0.00015814	0.0034345	1.011	2.2143	2.1168	2.6882	2.5004	2.861	3.1679
ABHD16A	0.13469	1.238	0.79171	0.44719	0.69276	-6.3376	1.1019	1.1507	1.437	1.3648	1.3679	1.0055
ABHD17A	0.045011	6.4284	0.37519	0.71548	0.86682	-7.7905	6.2532	6.456	6.5226	6.4917	6.1935	6.6534
ABHD17B	0.30993	4.6094	4.7039	0.00087325	0.01217	-1.2271	4.4737	4.4697	4.6107	4.518	4.7551	4.8291
ABHD17C	0.30184	2.9151	2.1321	0.059238	0.2171	-5.133	2.8429	2.6903	3.0369	2.6443	3.0037	3.2725
ABHD18	-0.055665	4.8249	-0.80121	0.44192	0.68918	-7.2755	4.7935	4.9186	4.8557	4.8408	4.8289	4.7121
ABHD2	-0.076519	6.4906	-1.4664	0.17375	0.41659	-6.8156	6.5679	6.5871	6.3471	6.4277	6.4618	6.552
ABHD3	0.35108	3.6948	3.9391	0.0028651	0.028895	-2.2727	3.4449	3.6317	3.6312	3.7477	3.874	3.8396
ABHD4	-0.10882	3.0336	-1.0995	0.2977	0.5592	-6.5329	2.9521	2.8924	3.3114	3.3473	2.7727	2.9258
ABHD5	-0.29031	5.1404	-5.0861	0.00049748	0.0081447	-0.7218	5.3193	5.2791	5.0824	5.1377	5.0157	5.008
ABHD6	0.1773	2.6408	1.4845	0.16898	0.40997	-6.0338	2.5318	2.798	2.4843	2.3729	2.7464	2.9115
ABHD8	0.3498	2.9499	3.0251	0.013004	0.081301	-3.6267	2.5958	2.84	3.0481	3.0829	2.9586	3.1739
ABI1	0.14445	5.8845	2.8084	0.018796	0.10495	-4.6172	5.795	5.8337	5.8951	5.8842	5.9822	5.9164
ABI2	-0.067249	5.6744	-1.2559	0.23815	0.49623	-6.96	5.6528	5.716	5.7026	5.7505	5.61	5.6144
ABL1	-0.15301	6.5448	-3.326	0.0078349	0.057331	-3.8109	6.6296	6.6302	6.5464	6.5045	6.4646	6.4937
ABL2	0.27078	4.3976	4.0711	0.0023207	0.024846	-2.2168	4.3257	4.297	4.2556	4.3453	4.5978	4.5644
ABLIM1	0.39824	-0.76116	0.9542	0.36283	0.62211	-5.6466	-1.5233	-0.25485	-0.67475	-0.97869	-0.95399	-0.18139
ABLIM3	0.54128	0.65979	2.5858	0.027465	0.13444	-3.7831	0.45613	0.32165	0.87724	0.51255	1.0514	0.73976
ABO	0.43238	0.023529	1.4504	0.17805	0.42205	-5.2727	-0.45681	-0.021648	0.15685	0.51255	0.32865	-0.37842
ABR	0.1233	5.1851	1.9666	0.078039	0.25768	-5.9041	5.1327	5.1982	5.1022	5.0825	5.2323	5.3627
ABRACL	0.23637	4.5184	3.5951	0.0050126	0.04206	-3.0393	4.434	4.4543	4.4419	4.4539	4.7167	4.6094
ABT1	-0.054437	6.2285	-0.77269	0.45786	0.70126	-7.5323	6.3085	6.2507	6.2279	6.0921	6.1506	6.3412
ABTB1	0.24472	1.3953	1.5065	0.16334	0.40162	-5.5719	1.0109	1.1884	1.8562	1.7569	1.3765	1.1829
ABTB2	0.85752	0.3048	3.5756	0.0051757	0.043097	-2.048	-0.30871	-0.30638	0.43129	0.80909	0.46373	0.73976
AC000035.3	1.4134	-2.0152	2.9065	0.015904	0.094118	-2.8275	-3.3443	-2.1808	-1.6994	-1.7524	-1.4655	-1.6485
AC000068.5	0.43627	-1.2542	1.1802	0.26567	0.52747	-5.2143	-1.8937	-1.4439	-0.62666	-0.92525	-1.2922	-1.3437
AC000089.3	-0.43052	-0.088922	-1.4625	0.17479	0.41772	-5.2223	0.31102	-0.41531	0.23702	0.13888	-0.27862	-0.52652
AC000120.7	0.21451	0.13114	0.87754	0.4011	0.65387	-5.9267	0.024898	-0.25485	0.23702	0.56951	0.21832	-0.0080546
AC000123.2	-0.052089	1.716	-0.33015	0.7482	0.88396	-6.7706	1.6766	1.8606	1.5248	1.8821	1.7044	1.6477
AC000123.3	0.16014	-1.6837	0.33207	0.7468	0.88367	-5.6797	-1.825	-2.1808	-1.1998	-0.92525	-1.4054	-2.5661
AC001226.7	0.79338	-3.7558	0.7052	0.49703	0.73112	-5.1035	-3.1638	-6.0877	-2.6505	-4.3847	-4.2127	-2.0355
AC002056.3	0.44267	-2.4169	0.62331	0.54725	0.76701	-5.3892	-3.5508	-1.6954	-1.8025	-2.0628	-1.9757	-3.414
AC002075.4	0.083895	-0.64696	0.24304	0.81296	0.91716	-6.0221	-0.62187	-1.3328	-0.36757	0.034853	-0.7163	-0.87799
AC002116.7	-0.18497	1.3548	-1.0515	0.31816	0.57994	-6.1138	1.1454	1.5196	1.6569	1.5834	1.0406	1.1829
AC002117.1	0.083983	-1.3357	0.24151	0.81411	0.91791	-5.9107	-1.4183	-1.2298	-1.6994	-1.2803	-1.4054	-0.98109
AC002310.12	0.26527	1.7703	2.0029	0.073484	0.24814	-5.005	1.6466	1.5047	1.8477	1.8746	1.8472	1.9006
AC002310.14	0.43526	-2.3265	0.77551	0.45627	0.70016	-5.3219	-2.8589	-2.6283	-2.4699	-1.3491	-2.3762	-2.2765
AC002310.7	0.24703	-0.38965	0.89514	0.39208	0.64543	-5.731	-0.84184	-0.59588	-0.049598	0.1882	-0.51229	-0.52652
AC002454.1	0.5343	-1.4849	1.5555	0.15136	0.38378	-4.8127	-1.4699	-1.8398	-1.8025	-1.6622	-1.0428	-1.0921
AC002467.7	-0.088167	2.2566	-0.52409	0.61181	0.80902	-6.8447	2.1085	2.6299	2.2596	2.091	2.1473	2.3029
AC002550.6	-0.043273	-1.9005	-0.095655	0.92571	0.96929	-5.781	-2.0418	-1.2298	-2.3095	-1.9517	-1.5938	-2.2765
AC002551.1	0.85797	-2.8122	1.5872	0.14403	0.37238	-4.5142	-3.5508	-2.6283	-2.857	-3.0062	-2.2652	-2.5661
AC003002.6	0.6234	-3.0824	0.83431	0.42389	0.6735	-5.0826	-3.7918	-3.7658	-1.6994	-2.4587	-2.6278	-4.151
AC003104.1	-0.084401	1.5915	-0.41293	0.68851	0.85211	-6.6874	1.6942	1.4897	1.3792	1.9764	1.6056	1.4036
AC003991.3	0.99406	-2.6768	1.4451	0.17949	0.42354	-4.6372	-2.6074	-4.5028	-2.4699	-1.7524	-2.1621	-2.5661
AC004057.1	-0.41164	-0.1239	-1.3028	0.22229	0.47554	-5.4789	-0.19594	0.70668	-0.36757	-0.40283	-0.42017	-0.06355
AC004067.5	-0.039694	-2.4482	-0.086808	0.93256	0.9717	-5.7074	-2.1219	-2.0003	-3.75	-2.6192	-2.1621	-2.0355
AC004069.2	-0.26842	-3.1448	-0.28989	0.77791	0.89817	-5.3925	-3.3443	-2.6283	-4.2355	-1.5773	-2.9326	-4.151
AC004076.5	-0.00082938	0.1012	-0.0032334	0.99748	0.99899	-6.3461	0.043394	0.25211	-0.11445	0.3702	0.2373	-0.18139
AC004381.6	-0.0050168	5.2961	-0.090578	0.92964	0.97094	-7.6973	5.2593	5.2857	5.3774	5.332	5.2771	5.2449
AC004381.7	-1.1879	-2.7201	-1.2483	0.24079	0.49927	-4.7863	-1.8937	-2.9178	-1.4281	-2.1831	-2.1621	-5.736
AC004381.8	1.4597	-2.7121	2.3855	0.038622	0.16681	-3.5171	-3.5508	-4.5028	-1.6994	-1.5773	-2.3762	-2.5661
AC004453.8	-0.0071945	2.2431	-0.049393	0.96159	0.98419	-6.9759	2.2184	2.1649	2.2272	2.3018	2.0487	2.4976
AC004510.3	-0.35123	-1.0157	-1.0758	0.30769	0.56889	-5.3936	-1.0614	-0.87828	-0.77603	-0.59809	-1.2922	-1.488
AC004549.6	0.39937	-2.8976	0.64754	0.5321	0.75782	-5.3314	-2.7277	-3.2804	-2.6505	-3.2472	-2.0659	-3.414
AC004840.8	0.4508	-2.7824	0.60472	0.55905	0.77534	-5.3236	-3.7918	-2.6283	-3.098	-1.4972	-3.1132	-2.5661
AC004854.4	0.19482	-1.0936	0.49004	0.63484	0.82236	-5.9311	-0.53698	-1.6954	-1.1998	-1.8486	-0.83026	-0.45057
AC004893.11	-0.23933	0.83243	-1.1551	0.27532	0.53684	-5.8808	0.72032	1.2069	0.95831	0.82477	0.64525	0.63906
AC004951.5	-0.60092	-0.31358	-2.227	0.050507	0.19756	-4.1011	0.1151	-0.20509	-0.44887	-0.1067	-0.54435	-0.69158
AC004951.6	-0.29083	-0.017273	-0.9505	0.36461	0.62354	-5.8107	-0.051554	0.35521	0.15685	0.2359	0.077949	-0.87799
AC004967.7	-0.21085	2.0942	-1.7575	0.10983	0.31707	-5.4725	2.1979	2.1837	2.0901	2.0715	1.9312	2.0906
AC004980.7	-0.044573	2.2989	-0.28024	0.78509	0.90188	-6.9181	2.2937	2.0772	2.3405	2.7425	2.1869	2.1528
AC004985.12	-1.3146	-3.3905	-1.8099	0.1009	0.3019	-4.1836	-3.3443	-2.0003	-3.3875	-3.2472	-4.2127	-4.151
AC004987.9	0.19942	-2.4966	0.368	0.72066	0.86923	-5.6004	-2.6074	-2.0003	-3.75	-2.1831	-2.1621	-2.2765
AC005037.3	-0.8711	-2.3418	-1.4638	0.17445	0.41746	-4.6781	-2.1219	-1.8398	-1.4281	-2.6192	-2.6278	-3.414
AC005042.2	-0.81138	-0.78477	-1.954	0.07968	0.26104	-4.3492	-0.38086	-0.59588	-0.88497	-0.020113	-0.99772	-1.8291
AC005062.2	0.15082	-2.0192	0.27741	0.78721	0.90294	-5.6675	-2.4963	-1.8398	-2.4699	-1.2148	-2.2652	-1.8291
AC005076.5	0.22693	1.0643	1.1973	0.25922	0.52013	-5.9047	0.74313	1.1119	1.2818	1.0145	1.0514	1.1829
AC005083.1	0.40017	0.23967	1.5946	0.14236	0.36995	-5.1642	0.23259	-0.41531	0.2881	0.51255	0.44752	0.37255
AC005154.6	0.042494	4.2384	0.52425	0.61171	0.80901	-7.3352	4.1787	4.1732	4.3652	4.3412	4.2956	4.0762
AC005189.6	-0.43913	-2.2978	-0.92872	0.37525	0.63255	-5.2518	-2.1219	-2.0003	-2.6505	-1.9517	-2.4965	-2.5661
AC005224.2	0.030879	-0.85036	0.087058	0.93237	0.97162	-6.1011	-0.56473	-0.95845	-0.58011	-1.6622	-0.64504	-0.69158
AC005251.3	0.033403	1.6622	0.18611	0.85614	0.93834	-6.7887	1.6825	1.4897	1.4815	1.9408	1.5835	1.7954
AC005255.3	0.31905	-1.5216	0.78468	0.45111	0.69596	-5.62	-1.8937	-1.0433	-2.0338	-1.8486	-1.5282	-0.78178
AC005262.2	-0.59001	-2.4881	-1.0447	0.32115	0.58233	-5.0706	-2.6074	-2.3873	-1.9135	-2.1831	-3.5607	-2.2765
AC005262.3	0.29948	-1.4872	0.69125	0.50538	0.73815	-5.5977	-2.1219	-1.3328	-1.513	-0.87372	-1.5938	-1.488
AC005301.9	-0.32235	-0.19258	-1.2319	0.24659	0.50614	-5.4822	-0.19594	0.10209	0.04252	-0.1067	-0.30584	-0.69158
AC005306.3	-0.050583	0.79468	-0.27127	0.79179	0.90573	-6.4957	0.82024	0.68045	1.0351	0.87082	0.7937	0.56781
AC005307.3	-0.77436	-2.423	-1.1623	0.27251	0.53411	-4.9748	-1.7594	-2.9178	-2.6505	-1.3491	-2.9326	-2.9286
AC005329.7	1.8978	-3.0755	3.1762	0.010074	0.068698	-2.5295	-4.4439	-3.2804	-3.3875	-3.2472	-2.2652	-1.8291
AC005339.2	-0.18202	-1.9472	-0.3536	0.7311	0.87465	-5.6329	-1.7594	-2.1808	-1.8025	-1.3491	-1.6625	-2.9286
AC005363.11	1.3316	-2.822	2.3479	0.041168	0.17301	-3.5692	-3.5508	-3.2804	-2.4699	-3.5367	-2.2652	-1.8291
AC005519.4	0.392	-0.7246	1.1688	0.27	0.53172	-5.4222	-1.3205	-0.47303	-0.4913	-0.77588	-0.68023	-0.60669
AC005523.3	-0.76173	-1.5257	-1.9422	0.081243	0.26454	-4.2421	-1.1015	-1.3328	-1.1311	-1.6622	-1.8908	-2.0355
AC005540.3	0.073355	-0.060938	0.30018	0.77028	0.89525	-6.2488	-0.11167	-0.25485	-0.049598	0.034853	-0.22567	0.2413
AC005546.2	-0.046405	-0.48311	-0.16007	0.87606	0.9463	-6.1699	-0.45681	-0.20509	-0.44887	-0.68425	-0.22567	-0.87799
AC005562.1	0.013612	-2.6504	0.017998	0.986	0.99481	-5.534	-2.3932	-2.9178	-2.857	-1.8486	-1.7347	-4.151
AC005578.3	0.29936	-1.7801	0.69615	0.50244	0.73586	-5.5647	-2.0418	-1.8398	-1.513	-2.1831	-1.8908	-1.2124
AC005593.2	0.44243	-0.98092	1.1151	0.29128	0.55258	-5.3549	-1.0224	-2.0003	-0.77603	-0.29722	-0.91156	-0.87799
AC005614.3	0.077468	-2.2954	0.14703	0.88608	0.95097	-5.6492	-2.7277	-2.0003	-2.1651	-2.4587	-2.7722	-1.6485
AC005624.2	0.19189	-2.0908	0.37438	0.71606	0.86698	-5.6088	-2.4963	-2.1808	-1.3479	-2.3143	-2.3762	-1.8291
AC005682.5	-0.044996	3.7974	-0.55534	0.59106	0.79607	-7.2278	3.854	3.8176	3.7452	3.8218	3.8449	3.7007
AC005740.3	0.3344	-2.7958	0.72185	0.48718	0.72418	-5.4227	-2.2068	-2.6283	-4.2355	-3.5367	-1.8908	-2.2765
AC005775.2	-0.48677	-2.4547	-0.86451	0.40788	0.66001	-5.21	-2.8589	-2.0003	-2.1651	-1.6622	-3.1132	-2.9286
AC005776.1	-0.4924	-2.0543	-0.87662	0.40158	0.65441	-5.2938	-1.6966	-2.1808	-1.8025	-1.4212	-1.8106	-3.414
AC005785.2	0.56577	-2.2856	0.96246	0.35887	0.61798	-5.2206	-3.0033	-1.8398	-2.0338	-2.3143	-1.5938	-2.9286
AC005785.5	-0.0547	0.11	-0.20843	0.83915	0.92974	-6.3311	0.1834	0.2873	-0.018234	0.1882	0.39777	-0.37842
AC005786.7	0.090114	-3.334	0.11964	0.90718	0.96099	-5.3182	-4.4439	-3.2804	-2.0338	-2.6192	-4.2127	-3.414
AC005789.9	-0.5569	-2.7169	-1.0957	0.29929	0.56091	-5.0487	-2.2068	-2.3873	-3.3875	-2.6192	-2.7722	-2.9286
AC005795.1	0.012818	-1.4054	0.035777	0.97218	0.98931	-5.8587	-1.5788	-1.5642	-1.1311	-1.152	-1.6625	-1.3437
AC005822.1	-0.28163	-1.4522	-0.73631	0.47872	0.71747	-5.5696	-1.6365	-1.3328	-1.0655	-1.2148	-1.9757	-1.488
AC006026.9	-0.38605	-2.0041	-0.89616	0.39156	0.64501	-5.3819	-1.5788	-1.5642	-2.4699	-2.1831	-1.6625	-2.5661
AC006033.22	0.66754	-3.0094	0.98667	0.34744	0.60726	-5.1376	-3.7918	-1.8398	-3.098	-4.3847	-2.3762	-2.5661
AC006042.8	0.07818	-1.1136	0.20164	0.8443	0.93274	-5.9297	-1.2289	-1.0433	-1.0028	-0.82397	-0.7533	-1.8291
AC006077.3	-0.1346	0.027808	-0.60287	0.56023	0.77624	-6.1334	0.16663	0.020787	0.04252	0.061571	0.056732	-0.18139
AC006116.17	-0.3462	1.2751	-2.1483	0.057657	0.21343	-4.6524	1.4596	1.3961	1.1908	1.3102	0.99673	1.2974
AC006116.19	-0.070894	-0.92	-0.24146	0.81416	0.91791	-6.0658	-0.65131	-0.87828	-1.1311	-1.4212	-0.91156	-0.52652
AC006116.22	0.0088621	0.25874	0.038335	0.97019	0.98836	-6.3876	0.0061616	0.48212	0.2881	0.3702	0.11947	0.28639
AC006128.2	0.266	-2.9791	0.42983	0.67658	0.8456	-5.4258	-2.7277	-3.2804	-2.6505	-3.5367	-2.2652	-3.414
AC006160.5	-0.11869	-1.6296	-0.24961	0.80802	0.91442	-5.8171	-1.1851	-1.6954	-1.3479	-2.1831	-1.0893	-2.2765
AC006262.5	-0.65422	-1.425	-1.4388	0.18123	0.42576	-4.8047	-1.3686	-2.0003	-0.18235	-0.36676	-2.0659	-2.5661
AC006277.2	1.7263	-2.7252	2.6511	0.024575	0.1253	-3.1808	-3.3443	-4.5028	-2.4699	-2.3143	-2.3762	-1.3437
AC006369.2	-0.29068	-0.45816	-0.9027	0.38824	0.64236	-5.7074	-0.38086	-0.41531	-0.081659	-0.13676	-0.39073	-1.3437
AC006486.10	0.3038	0.58441	1.6281	0.13505	0.35813	-5.2357	0.49697	0.35521	0.60248	0.60627	0.80647	0.63906
AC006538.1	-0.11692	1.8394	-0.85059	0.41521	0.66676	-6.5008	1.896	2.107	1.7234	1.6814	1.9136	1.7152
AC006547.8	0.64636	-0.94937	1.8177	0.09962	0.29942	-4.5095	-1.3205	-1.6954	-0.25361	-0.72933	-0.7163	-0.98109
AC006942.4	0.077539	-2.0024	0.15372	0.88093	0.94875	-5.735	-2.3932	-1.6954	-2.0338	-2.1831	-2.4965	-1.2124
AC006946.16	0.27671	0.32453	1.0992	0.29785	0.55932	-5.807	-0.032058	0.57047	0.38512	0.30461	0.57237	0.14667
AC006946.17	-1.109	-2.7296	-2.0521	0.067719	0.23658	-3.9568	-1.9658	-2.3873	-3.098	-2.7997	-3.5607	-2.5661
AC006978.6	0.56617	2.2528	4.336	0.0015311	0.01853	-1.2643	2.0319	1.7764	2.2975	2.4304	2.5517	2.4289
AC007036.4	-0.86592	-1.3251	-2.3116	0.043778	0.17965	-3.7386	-0.98444	-0.87828	-1.0655	-1.152	-1.5938	-2.2765
AC007038.7	0.1592	0.52007	0.60849	0.55664	0.77433	-6.2623	0.16663	0.75775	0.45383	0.85563	0.64525	0.2413
AC007041.2	1.401	-2.8926	1.4068	0.19025	0.43659	-4.6493	-1.9658	-6.0877	-3.098	-1.9517	-1.9757	-2.2765
AC007128.1	-0.84561	-3.5738	-0.97923	0.35092	0.61094	-4.9606	-4.0813	-2.0003	-3.098	-3.8993	-4.2127	-4.151
AC007191.4	0.22001	1.6251	1.1149	0.29137	0.55262	-6.1271	1.3524	1.5343	1.7869	2.0247	1.8223	1.2298
AC007192.6	-0.27474	-2.3996	-0.51352	0.61891	0.81334	-5.5289	-2.1219	-2.0003	-2.0338	-3.2472	-2.0659	-2.9286
AC007228.11	0.88936	-2.1233	1.7688	0.10784	0.31394	-4.3827	-3.1638	-1.8398	-2.0338	-2.0628	-1.8106	-1.8291
AC007228.9	0.37466	-1.3746	0.90889	0.38512	0.6397	-5.4814	-1.8937	-1.4439	-1.513	-0.92525	-1.5938	-0.87799
AC007238.1	0.31449	-0.75142	0.95493	0.36248	0.62172	-5.6104	-0.68137	-1.4439	-0.67475	-0.43983	-0.57714	-0.69158
AC007246.3	0.4665	1.1794	2.5117	0.031161	0.14531	-4.0501	1.0014	1.0103	1.3068	0.94444	1.5835	1.2298
AC007249.3	-0.46821	-2.8704	-0.65051	0.53026	0.75726	-5.3011	-3.3443	-2.1808	-2.0338	-3.2472	-3.8502	-2.5661
AC007255.8	0.18108	-2.0779	0.38334	0.70962	0.8637	-5.6553	-1.6966	-2.6283	-1.9135	-2.4587	-1.7347	-2.0355
AC007256.5	-0.21527	-0.24665	-0.71797	0.48946	0.72584	-5.9198	-0.62187	-0.021648	0.10082	0.16375	-0.79126	-0.30971
AC007292.3	-0.11213	-0.24409	-0.43631	0.67202	0.84293	-6.0981	-0.45681	-0.157	0.012463	0.11357	-0.45023	-0.52652
AC007292.6	0.76363	-1.4899	2.0486	0.068117	0.23746	-4.1581	-1.3205	-2.1808	-2.0338	-1.7524	-0.87034	-0.78178
AC007292.7	-0.52017	-1.1892	-1.6124	0.13843	0.36395	-4.7872	-0.77549	-0.95845	-1.1998	-1.4212	-1.2922	-1.488
AC007318.5	0.49474	0.15836	2.0417	0.068903	0.23888	-4.547	-0.15319	0.17905	-0.29061	0.21225	0.36362	0.63906
AC007319.1	0.18808	-2.4621	0.418	0.68492	0.8501	-5.5776	-2.4963	-2.1808	-2.6505	-3.0062	-2.1621	-2.2765
AC007365.3	0.51391	-1.9671	1.121	0.2889	0.55018	-5.2102	-2.2068	-1.8398	-1.8025	-3.0062	-1.7347	-1.2124
AC007383.3	0.033019	1.2637	0.1961	0.84852	0.93488	-6.6635	1.345	0.98908	1.3674	1.3541	1.2514	1.2753
AC007387.2	-0.6343	-2.145	-1.0657	0.31198	0.57345	-5.1678	-1.5788	-1.6954	-2.857	-1.6622	-1.6625	-3.414
AC007405.4	-1.0121	0.057693	-4.3398	0.0015221	0.018493	-0.83423	0.63752	0.51218	0.15685	-0.020113	-0.33358	-0.60669
AC007405.6	-0.19033	1.3385	-1.1566	0.27474	0.53642	-6.0435	1.33	1.5917	1.2174	1.3541	1.1548	1.383
AC007405.8	-0.43951	-0.23445	-1.5008	0.16478	0.40408	-5.1666	-0.24	0.06201	-0.25361	-0.13676	-0.83026	-0.0080546
AC007566.10	-0.21714	-1.7274	-0.43164	0.6753	0.8448	-5.7187	-2.1219	-0.73019	-1.9135	-1.7524	-1.8106	-2.0355
AC007620.3	0.12483	-1.74	0.31257	0.76113	0.89075	-5.7632	-1.9658	-1.5642	-2.0338	-1.5773	-1.8106	-1.488
AC007773.2	-0.10806	0.6569	-0.47493	0.6452	0.82897	-6.4157	0.56255	0.94569	0.40839	0.65971	0.41455	0.95053
AC007787.3	0.20836	-0.12276	0.65999	0.5244	0.75242	-6.0355	-0.071317	-0.59588	0.40839	-0.33157	0.035199	-0.18139
AC007879.2	0.67635	-1.2088	1.8977	0.087418	0.27665	-4.3721	-1.4183	-2.0003	-1.0655	-1.0342	-1.0428	-0.69158
AC007879.5	0.46406	-0.93401	1.3824	0.19741	0.44535	-5.103	-1.1015	-1.5642	-0.4913	-0.92525	-0.83026	-0.69158
AC007950.2	0.44862	-3.1332	0.57722	0.57676	0.78612	-5.2521	-3.0033	-4.5028	-3.098	-1.8486	-2.9326	-3.414
AC007969.5	-0.065374	2.1233	-0.3641	0.72348	0.87054	-6.8697	2.0226	2.1744	2.0536	2.2505	1.8096	2.4289
AC008155.1	-0.21823	-2.6197	-0.37571	0.7151	0.86668	-5.4794	-2.297	-2.9178	-2.6505	-2.0628	-2.3762	-3.414
AC008592.3	-0.084051	-1.7447	-0.16996	0.86848	0.94278	-5.7963	-2.1219	-1.1335	-2.3095	-1.3491	-2.0659	-1.488
AC008697.1	1.549	-1.7834	3.7037	0.0041946	0.037353	-1.7222	-2.3932	-2.9178	-1.8025	-1.4972	-0.99772	-1.0921
AC008746.12	0.25703	-0.04679	0.85748	0.41157	0.66344	-5.9075	-0.032058	-0.41531	-0.11445	0.34867	0.31083	-0.37842
AC008746.3	0.27198	-1.6723	0.60042	0.5618	0.77686	-5.6152	-2.1219	-1.8398	-1.6994	-1.2148	-2.0659	-1.0921
AC008753.3	0.27171	-3.0999	0.40496	0.69417	0.85504	-5.3839	-3.3443	-3.2804	-3.75	-2.1831	-3.1132	-2.9286
AC008753.6	0.054189	-2.2506	0.098865	0.92323	0.96803	-5.6707	-2.8589	-1.5642	-2.1651	-2.4587	-2.6278	-1.8291
AC008850.3	-0.76724	-1.6101	-2.0998	0.062535	0.22426	-4.0251	-1.1427	-1.2298	-1.6994	-1.6622	-1.8908	-2.0355
AC008982.2	-0.19078	2.3538	-1.3888	0.19552	0.44317	-6.0449	2.5577	2.3758	2.3344	2.3782	2.4249	2.0519
AC009005.2	-0.35186	2.494	-3.2863	0.0083728	0.059955	-3.0511	2.5896	2.5669	2.669	2.6575	2.2111	2.2696
AC009120.11	0.89327	-2.9871	1.2264	0.24857	0.50849	-4.8043	-4.0813	-3.2804	-2.857	-1.6622	-2.6278	-3.414
AC009120.3	0.30174	-0.61961	1.1026	0.29644	0.55782	-5.524	-0.80828	-0.73019	-0.58011	-0.51679	-0.39073	-0.69158
AC009120.4	0.086607	-1.347	0.2255	0.8262	0.92378	-5.8451	-1.3205	-1.6954	-1.0655	-1.0342	-1.1374	-1.8291
AC009120.6	0.41207	1.3552	2.4792	0.032938	0.15063	-4.1174	1.0931	1.0721	1.5354	1.5648	1.6129	1.2527
AC009133.12	-0.23441	-2.24	-0.51261	0.61953	0.81359	-5.5427	-2.297	-2.0003	-2.1651	-2.3143	-2.6278	-2.0355
AC009133.15	0.40929	-1.1691	1.0757	0.30771	0.56889	-5.3949	-1.7594	-0.95845	-0.82947	-1.3491	-1.1374	-0.98109
AC009237.8	0.11667	-0.38435	0.42122	0.68264	0.84882	-6.1118	-0.50976	-0.20509	-0.40765	-0.36676	-0.12527	-0.69158
AC009245.3	-0.080421	1.2806	-0.3796	0.7123	0.86519	-6.6057	1.5334	0.85478	1.391	1.438	1.2135	1.2527
AC009299.3	0.39184	-0.92993	1.1609	0.27306	0.5346	-5.3406	-1.0224	-1.5642	-0.58011	-0.64052	-0.68023	-1.0921
AC009303.2	0.31184	-2.8057	0.51588	0.61732	0.81238	-5.4532	-3.0033	-2.1808	-3.098	-3.2472	-1.8908	-3.414
AC009303.3	0.51049	-2.3328	0.99253	0.34471	0.60482	-5.23	-2.7277	-1.8398	-2.4699	-2.7997	-1.5938	-2.5661
AC009362.2	0.16137	-1.9465	0.3384	0.74217	0.881	-5.6344	-2.297	-2.3873	-1.513	-1.4972	-2.4965	-1.488
AC009403.2	-0.0055244	1.1103	-0.030023	0.97665	0.99111	-6.6665	1.2446	1.1697	1.02	0.98687	1.3765	0.86394
AC009404.2	-0.28043	1.7358	-1.9909	0.074969	0.25144	-5.0198	1.8806	1.801	1.7047	1.7892	1.4917	1.7478
AC009413.2	-0.29672	-0.50408	-0.93328	0.373	0.63026	-5.6916	-0.43105	-0.66147	-0.53502	0.0076318	-0.95399	-0.45057
AC009473.1	0.49752	-2.3901	0.89952	0.38985	0.644	-5.218	-2.7277	-2.9178	-2.4699	-1.4972	-2.1621	-2.5661
AC009487.6	0.13877	0.073121	0.50329	0.62583	0.81765	-6.2093	0.0061616	-0.11046	-0.25361	0.43294	-0.0088559	0.37255
AC009506.1	0.25375	1.256	1.3077	0.2207	0.47355	-5.8177	0.83092	1.3469	1.3314	1.527	1.2699	1.2298
AC009948.5	0.3979	3.4982	4.3378	0.0015266	0.018501	-1.5521	3.2986	3.1095	3.6965	3.6164	3.6229	3.6456
AC009948.7	0.54717	-2.3106	1.2167	0.25208	0.51248	-5.0055	-2.4963	-2.6283	-2.4699	-2.4587	-2.1621	-1.6485
AC009961.3	-0.25267	0.058659	-1.1809	0.2654	0.52711	-5.6651	0.34123	0.14108	-0.081659	-0.13676	-0.0088559	0.096915
AC009963.5	-0.5735	-2.2065	-1.0842	0.3041	0.56493	-5.1367	-1.8937	-2.1808	-2.6505	-1.7524	-2.9326	-1.8291
AC010150.1	0.2083	-2.5523	0.29748	0.77229	0.89606	-5.5596	-3.1638	-1.5642	-3.098	-2.1831	-1.8908	-3.414
AC010226.4	0.4877	-3.0628	0.70654	0.49624	0.73063	-5.1298	-4.0813	-3.7658	-1.6032	-1.6622	-3.1132	-4.151
AC010468.1	-0.069906	0.66367	-0.38401	0.70914	0.86353	-6.4531	0.83092	0.59876	0.60248	0.56951	0.6734	0.70697
AC010504.2	-0.17292	-2.1793	-0.32328	0.75325	0.88638	-5.5656	-2.4963	-2.3873	-1.272	-1.9517	-2.9326	-2.0355
AC010642.1	-0.19557	1.7135	-1.3298	0.21357	0.46519	-5.9492	1.8651	1.8723	1.5248	1.7651	1.7514	1.5024
AC010677.5	-0.96134	-2.8522	-1.3901	0.19514	0.4428	-4.701	-2.3932	-2.3873	-3.75	-1.8486	-3.3196	-3.414
AC010761.8	-0.29629	-2.2658	-0.54073	0.60072	0.80199	-5.4783	-1.9658	-2.6283	-2.3095	-1.4972	-2.2652	-2.9286
AC010894.3	-0.55919	-1.3038	-1.397	0.1931	0.43996	-5.0377	-1.2289	-0.73019	-1.513	-1.4972	-1.9757	-0.87799
AC010900.2	-0.3016	-3.0806	-0.30815	0.76439	0.89233	-5.3595	-3.3443	-2.3873	-2.857	-2.1831	-1.9757	-5.736
AC010970.2	-0.29885	7.9103	-0.45112	0.66168	0.8363	-7.8933	7.955	7.9508	8.6748	7.933	8.9475	6.0008
AC011330.13	0.34254	-1.7264	0.71244	0.49274	0.72838	-5.5228	-2.2068	-1.6954	-1.9135	-0.97869	-1.5282	-2.0355
AC011330.5	0.38393	-2.3367	0.59342	0.56628	0.78024	-5.493	-2.4963	-2.3873	-1.3479	-3.5367	-1.9757	-2.2765
AC011747.3	-0.15496	0.14089	-0.61557	0.55214	0.77101	-6.1178	0.024898	0.020787	0.26279	0.64211	-0.2519	0.14667
AC011747.4	-0.25218	1.9594	-1.4969	0.16578	0.40564	-5.7396	2.0179	1.8252	2.2975	2.394	1.8595	1.3621
AC011933.2	0.49361	-2.5522	0.79001	0.44814	0.69387	-5.2546	-2.6074	-3.7658	-2.4699	-1.6622	-2.7722	-2.0355
AC012146.7	-0.12764	1.6414	-0.75891	0.46569	0.70673	-6.5224	1.8176	1.687	1.7326	1.2649	1.5983	1.7478
AC012354.8	-0.33981	-2.32	-0.66547	0.52104	0.74911	-5.441	-1.825	-2.3873	-2.6505	-2.0628	-2.0659	-2.9286
AC012358.7	-0.38645	-1.2206	-0.86311	0.40862	0.66078	-5.5627	-0.71207	-1.3328	-1.513	-0.77588	-0.95399	-2.0355
AC012360.4	-0.44722	-1.2475	-1.2021	0.25745	0.51824	-5.2129	-1.1427	-0.95845	-1.1311	-0.92525	-1.2922	-2.0355
AC012370.2	0.042415	-2.1216	0.067498	0.94754	0.97753	-5.6061	-1.9658	-2.9178	-1.272	-1.4972	-1.6625	-3.414
AC012442.6	0.35209	-2.8447	0.44748	0.66422	0.83819	-5.3806	-2.6074	-3.7658	-2.0338	-2.6192	-1.8908	-4.151
AC013461.1	-0.013275	6.9575	-0.22538	0.8263	0.92378	-7.9045	7.0164	6.9313	6.9291	6.9597	7.0344	6.8744
AC013463.2	0.37128	-2.578	0.63239	0.54154	0.76305	-5.3971	-2.7277	-2.9178	-1.8025	-3.2472	-2.4965	-2.2765
AC013474.4	-0.21559	-0.51665	-0.80687	0.4388	0.6866	-5.8244	-0.33236	-0.53315	-0.36757	-0.59809	-0.57714	-0.69158
AC015849.13	-0.19798	-1.1767	-0.61151	0.55472	0.77294	-5.7723	-0.94745	-1.2298	-1.1998	-1.152	-1.1872	-1.3437
AC015849.14	0.98693	-2.6833	1.7888	0.10441	0.30809	-4.278	-2.8589	-3.7658	-2.4699	-2.7997	-2.3762	-1.8291
AC015849.16	0.33085	-1.6555	0.7159	0.49068	0.72674	-5.5288	-1.5233	-2.6283	-1.513	-1.0919	-1.5282	-1.6485
AC015971.2	1.1528	-2.8205	1.852	0.094207	0.28909	-4.1803	-3.3443	-3.7658	-2.0338	-3.2472	-2.4965	-2.0355
AC016629.3	-0.58712	3.5862	-5.6652	0.00022068	0.004426	0.47416	3.8007	3.8679	3.788	3.6911	3.3408	3.0289
AC016691.2	-0.097171	-2.4328	-0.19885	0.84643	0.93372	-5.6215	-2.2068	-2.3873	-2.1651	-3.0062	-2.2652	-2.5661
AC016700.5	-0.1758	-1.5827	-0.41997	0.68352	0.84925	-5.7525	-1.7594	-1.2298	-1.9135	-1.2148	-1.8908	-1.488
AC016700.6	-0.19235	0.020546	-0.68512	0.50908	0.74118	-6.0667	0.1151	-0.11046	-0.18235	0.43294	-0.27862	0.14667
AC016708.2	0.070848	-1.2926	0.20909	0.83864	0.92964	-5.9367	-1.1015	-1.3328	-1.6994	-1.2803	-0.99772	-1.3437
AC016712.2	0.91372	-2.8464	1.1655	0.27128	0.53308	-4.925	-3.3443	-3.7658	-3.098	-2.4587	-3.3196	-1.0921
AC016734.2	-0.3493	0.1678	-1.5029	0.16424	0.40327	-5.3099	0.45613	0.32165	0.18407	-0.23088	-0.054299	0.33011
AC016738.4	-0.038919	-1.4945	-0.10437	0.91897	0.96634	-5.8813	-1.3205	-1.6954	-1.6994	-1.4972	-1.6625	-1.0921
AC016739.2	0.0028629	0.99267	0.015847	0.98767	0.99492	-6.6424	1.048	1.1507	1.02	0.6243	1.1347	0.97827
AC016747.3	-0.12932	2.4422	-0.99725	0.34253	0.6029	-6.5257	2.4784	2.574	2.2467	2.5053	2.3041	2.5448
AC016757.3	-0.33221	2.6745	-2.8699	0.016925	0.098068	-3.8241	2.7614	2.846	2.7257	2.6964	2.3658	2.652
AC017002.2	-0.03394	1.66	-0.21913	0.83102	0.92606	-6.7558	1.5269	1.7132	1.8562	1.867	1.6559	1.3408
AC017074.2	1.0033	-3.3661	1.5285	0.15786	0.39332	-4.5404	-2.7277	-4.5028	-3.75	-4.3847	-2.2652	-2.5661
AC018442.1	0.046856	-1.2921	0.10747	0.91657	0.96545	-5.9365	-1.2289	-1.2298	-2.0338	-0.72933	-1.0428	-1.488
AC018738.2	-0.31751	-1.6372	-0.68068	0.51177	0.74341	-5.5364	-1.825	-1.5642	-1.6032	-0.72933	-2.0659	-2.0355
AC018755.16	0.49256	-0.78487	1.4595	0.17558	0.4188	-5.0451	-1.0224	-1.4439	-0.77603	-0.29722	-0.79126	-0.37842
AC018766.6	-0.65723	-1.3788	-1.6238	0.13597	0.35984	-4.7318	-1.3205	-0.47303	-1.4281	-1.7524	-1.8106	-1.488
AC019181.2	-0.12383	-2.693	-0.18698	0.85548	0.93818	-5.469	-2.7277	-2.9178	-1.9135	-2.1831	-2.2652	-4.151
AC019181.3	0.65607	-1.4907	1.2431	0.24261	0.50124	-5.0828	-1.6365	-2.6283	-1.513	-0.43983	-1.2387	-1.488
AC019349.5	-2.0462	-2.9624	-2.5269	0.030365	0.14265	-3.3582	-1.825	-2.3873	-2.6505	-2.0628	-3.1132	-5.736
AC020571.3	0.3708	-1.3413	1.1183	0.28999	0.55141	-5.3387	-1.5233	-1.3328	-1.3479	-1.6622	-1.0893	-1.0921
AC020594.5	-0.83888	-3.6127	-0.82728	0.42768	0.67721	-5.046	-3.7918	-2.1808	-4.2355	-2.6192	-3.1132	-5.736
AC021016.7	2.329	-3.0476	2.645	0.02483	0.12604	-3.2141	-3.1638	-6.0877	-3.098	-2.4587	-2.2652	-1.2124
AC022007.5	-0.50072	-1.5468	-0.90502	0.38707	0.6414	-5.4108	-1.5233	-1.8398	-1.272	-1.0919	-2.7722	-0.78178
AC022182.2	0.10423	-0.64121	0.28841	0.77902	0.89869	-6.0645	-0.56473	-1.2298	-0.29061	-0.72933	-0.91156	-0.12127
AC022201.5	0.4045	-3.1141	0.56034	0.58777	0.794	-5.2807	-2.8589	-4.5028	-3.098	-2.1831	-3.1132	-2.9286
AC022210.2	0.19228	-0.092313	0.72753	0.48385	0.72167	-5.9873	-0.24	-0.30638	-0.081659	0.34867	0.035199	-0.30971
AC024560.3	0.030857	3.8039	0.35649	0.72899	0.87341	-7.3201	3.8409	3.6887	3.836	3.8699	3.8664	3.7214
AC025171.1	0.0036193	1.6671	0.02561	0.98008	0.99234	-6.7824	1.6222	1.4897	1.8979	1.8821	1.6274	1.4832
AC025335.1	-0.0040188	3.4462	-0.044881	0.9651	0.98615	-7.2982	3.4007	3.4878	3.4802	3.5089	3.4827	3.3166
AC026271.5	0.042901	1.9825	0.31775	0.75731	0.88869	-6.8646	1.98	2.1168	1.8897	1.8746	2.1623	1.8714
AC027119.1	0.43871	-1.1531	1.1787	0.26623	0.52788	-5.2363	-1.8937	-1.2298	-0.53502	-0.72933	-1.1872	-1.3437
AC027612.1	0.4952	-1.602	1.2176	0.25175	0.51214	-5.2016	-1.6966	-1.5642	-2.6505	-1.4212	-1.1872	-1.0921
AC027612.6	0.59288	0.26312	2.2563	0.048073	0.19085	-4.1648	-0.012822	-0.41531	0.60248	0.72801	0.63097	0.045385
AC034220.3	-0.45975	-0.98971	-1.2654	0.23485	0.49189	-5.2022	-0.98444	-0.95845	-0.94268	-0.36676	-1.5938	-1.0921
AC046143.3	-0.09881	-0.92537	-0.271	0.79199	0.90573	-5.9631	-1.0614	-0.66147	-0.82947	-0.59809	-0.7533	-1.6485
AC053503.4	-0.97034	-2.8205	-1.651	0.13024	0.35101	-4.4049	-2.7277	-2.1808	-2.857	-2.1831	-3.5607	-3.414
AC062017.1	0.42264	-0.10331	1.7042	0.11964	0.33347	-4.901	-0.50976	-0.41531	0.36147	0.061571	-0.054299	-0.06355
AC062029.1	0.43544	-0.50344	1.544	0.15411	0.38797	-5.0125	-1.0224	-0.66147	-0.11445	-0.33157	-0.51229	-0.37842
AC064834.2	0.062518	-1.9441	0.14123	0.89054	0.95263	-5.6756	-2.2068	-2.1808	-1.272	-1.6622	-2.0659	-2.2765
AC064850.4	-0.037346	-0.4814	-0.13633	0.89431	0.95473	-6.1757	-0.56473	-0.30638	-0.36757	-0.72933	-0.61069	-0.30971
AC067945.3	-0.30474	-2.7234	-0.55758	0.58958	0.79487	-5.3492	-2.7277	-2.9178	-2.1651	-2.1831	-2.9326	-3.414
AC068134.10	0.29157	-2.882	0.43157	0.67535	0.8448	-5.4226	-2.3932	-3.7658	-3.098	-2.4587	-2.1621	-3.414
AC068137.13	0.094522	-1.7818	0.24153	0.8141	0.91791	-5.7754	-1.5788	-2.0003	-1.8025	-1.9517	-1.5282	-1.8291
AC068499.10	0.50469	-3.705	0.62858	0.54393	0.7647	-5.2134	-4.0813	-3.7658	-3.75	-4.3847	-4.2127	-2.0355
AC068522.4	0.26207	-0.30589	0.84447	0.41846	0.66888	-5.8554	-0.30871	-0.87828	-0.25361	-0.23088	-0.45023	0.28639
AC068580.5	-0.81044	-1.8613	-1.822	0.098932	0.29791	-4.3326	-1.6365	-1.5642	-1.9135	-1.2803	-2.4965	-2.2765
AC068831.10	-0.20419	-2.1079	-0.38557	0.70802	0.86322	-5.6106	-1.8937	-2.6283	-1.9135	-1.9517	-2.7722	-1.488
AC068831.16	0.27594	-1.5051	0.70239	0.49871	0.73281	-5.5897	-1.4699	-2.1808	-1.272	-1.2148	-1.4054	-1.488
AC068831.6	-0.29659	-2.2924	-0.52974	0.60803	0.80698	-5.4883	-1.9658	-2.3873	-1.9135	-2.1831	-1.8908	-3.414
AC069513.4	-1.2129	-2.809	-1.9571	0.079272	0.26008	-4.0873	-1.825	-2.3873	-3.75	-3.0062	-3.8502	-2.0355
AC072062.1	-0.1132	-1.9123	-0.27586	0.78836	0.90343	-5.7228	-1.9658	-1.6954	-2.1651	-1.7524	-2.0659	-1.8291
AC073043.1	0.19717	-2.3142	0.3216	0.75448	0.8868	-5.5723	-1.825	-3.2804	-2.1651	-1.9517	-1.7347	-2.9286
AC073046.25	-0.060157	0.82394	-0.28877	0.77875	0.89865	-6.4958	0.90359	0.54162	0.84349	1.1821	0.70102	0.77182
AC073052.1	-0.096192	-0.38019	-0.31065	0.76255	0.89145	-6.1111	-0.38086	-0.35982	-0.049598	-0.19882	-0.1999	-1.0921
AC073063.10	0.69849	-2.0115	1.397	0.1931	0.43996	-4.8417	-2.2068	-2.9178	-2.0338	-1.7524	-2.0659	-1.0921
AC073283.4	-0.77547	-1.3495	-1.9157	0.084873	0.27226	-4.3117	-0.87619	-1.2298	-1.6032	-0.82397	-1.7347	-1.8291
AC073283.7	-0.16621	-3.4889	-0.21408	0.83485	0.92825	-5.3017	-4.0813	-3.2804	-3.3875	-2.1831	-3.8502	-4.151
AC073326.3	1.9789	-3.2631	3.0594	0.012272	0.07821	-2.6659	-4.4439	-3.2804	-4.2355	-3.8993	-2.3762	-1.3437
AC073342.12	0.56683	-2.9192	0.91221	0.38346	0.6391	-5.1354	-3.5508	-2.6283	-2.6505	-3.0062	-2.2652	-3.414
AC073415.2	0.4529	-0.58332	1.4274	0.1844	0.42963	-5.186	-0.62187	-0.80233	-0.82947	-0.47779	0.01334	-0.78178
AC073465.3	0.34362	-1.2015	1.0495	0.31902	0.58042	-5.4054	-1.3686	-1.5642	-1.0655	-1.0919	-1.1374	-0.98109
AC073934.6	0.33867	-2.455	0.57777	0.57639	0.78576	-5.423	-2.6074	-3.2804	-2.3095	-1.9517	-2.9326	-1.6485
AC074117.10	-0.026066	2.3839	-0.22046	0.83002	0.92578	-6.999	2.3281	2.5525	2.3704	2.2962	2.3787	2.3778
AC074141.3	-0.10423	0.56319	-0.33597	0.74394	0.88232	-6.3794	0.78769	0.21604	1.0351	0.72801	0.7937	-0.18139
AC074212.5	0.35378	0.090554	1.4542	0.17701	0.42093	-5.3099	-0.2178	-0.11046	0.012463	0.45326	0.11947	0.28639
AC074212.6	-0.056133	-0.86192	-0.12335	0.90431	0.95976	-5.991	-1.4183	-0.35982	-0.081659	-0.92525	-1.0428	-1.3437
AC074286.1	-0.2125	0.54336	-0.89492	0.39219	0.64543	-6.0667	0.72032	0.75775	0.60248	0.43294	0.7547	-0.0080546
AC074338.4	-0.38136	-2.9229	-0.64409	0.53423	0.75894	-5.3233	-3.0033	-2.1808	-3.3875	-2.6192	-2.9326	-3.414
AC074338.5	-1.5587	-3.9972	-1.686	0.12319	0.33962	-4.2864	-4.0813	-2.1808	-4.2355	-3.8993	-5.4351	-4.151
AC074391.1	0.75738	-3.6227	0.77815	0.45478	0.69878	-5.0173	-3.3443	-6.0877	-2.0338	-2.7997	-3.3196	-4.151
AC078852.1	-0.46872	-1.7657	-0.79564	0.44501	0.69141	-5.4088	-1.9658	-1.1335	-1.1311	-1.4212	-1.5282	-3.414
AC078852.2	0.073168	-2.6088	0.13932	0.892	0.95347	-5.6628	-2.3932	-1.8398	-3.75	-3.0062	-1.7347	-2.9286
AC078899.1	0.43316	-1.1703	1.2823	0.22912	0.48452	-5.1963	-1.5788	-1.1335	-1.1998	-1.2803	-1.1374	-0.69158
AC079248.1	-1.3442	-3.4813	-1.4658	0.1739	0.41676	-4.5332	-3.0033	-2.1808	-4.2355	-2.6192	-3.1132	-5.736
AC079250.1	-0.28907	3.052	-2.0802	0.064612	0.22887	-5.2208	3.2316	2.981	2.9953	3.35	2.8144	2.94
AC079305.10	0.37081	-1.5815	0.76269	0.46353	0.70496	-5.5575	-2.3932	-1.1335	-1.513	-1.5773	-1.8908	-0.98109
AC079466.1	0.26599	4.8316	4.0338	0.0024623	0.025954	-2.3369	4.662	4.5371	4.9919	5.0327	4.8736	4.8925
AC079776.1	-0.58431	-1.2268	-1.3976	0.19292	0.43994	-4.9786	-1.0224	-1.3328	-0.40765	-1.2148	-1.7347	-1.6485
AC079780.3	-1.2533	-3.4206	-1.7836	0.1053	0.30955	-4.2107	-3.3443	-2.1808	-3.3875	-3.2472	-4.2127	-4.151
AC079807.2	0.99947	-1.4666	2.6149	0.026137	0.12995	-3.2936	-1.6966	-2.3873	-1.6032	-1.2803	-0.95399	-0.87799
AC079922.2	-0.25382	1.3599	-1.1753	0.26751	0.52953	-6.02	1.6161	1.1697	1.2174	1.5461	1.0514	1.5586
AC079922.3	-0.060191	-0.40851	-0.22839	0.82402	0.92263	-6.1394	-0.53698	-0.35982	-0.32857	-0.1067	-0.51229	-0.60669
AC083843.1	-0.09273	2.8252	-0.78826	0.44911	0.69489	-6.7756	2.7073	2.7356	3.0068	3.1622	2.5402	2.7993
AC083843.2	0.045984	-0.78628	0.15009	0.88373	0.9505	-6.0757	-0.77549	-0.87828	-0.53502	-1.0919	-0.83026	-0.60669
AC083873.4	0.26773	-1.164	0.73693	0.47836	0.7173	-5.6809	-1.4183	-1.4439	-1.1311	-0.97869	-1.4054	-0.60669
AC083899.3	-0.17162	1.8922	-1.2717	0.23271	0.48933	-6.0751	2.0594	2.026	1.6858	1.897	1.937	1.7478
AC084082.3	-0.11138	1.3343	-0.49014	0.63477	0.82236	-6.5486	1.4106	1.2432	1.5248	1.6465	1.5074	0.67342
AC084117.3	-0.61782	-0.03809	-2.3025	0.044457	0.18181	-4.0088	0.28016	-0.065369	0.38512	0.25917	-0.30584	-0.78178
AC084219.4	0.14169	0.52139	0.74252	0.47512	0.71462	-6.1905	0.3854	0.57047	0.49789	0.55077	0.63097	0.49284
AC087294.2	-0.37726	0.52002	-1.6367	0.13322	0.35515	-5.1867	0.74313	0.75775	0.60248	0.55077	0.58725	-0.12127
AC090286.2	0.049722	-2.2966	0.084663	0.93423	0.97263	-5.5669	-2.297	-2.9178	-1.513	-1.6622	-1.9757	-3.414
AC090587.4	-0.26064	-0.50875	-0.81623	0.43368	0.6816	-5.843	-0.45681	-0.25485	-1.0028	-0.26367	-0.83026	-0.24412
AC090602.2	-0.21636	-1.2217	-0.52507	0.61115	0.80864	-5.8316	-0.98444	-1.3328	-1.8025	-0.92525	-1.5938	-0.69158
AC090616.2	-0.3731	-0.28523	-1.573	0.14728	0.37735	-5.0935	-0.032058	0.020787	-0.40765	-0.59809	-0.45023	-0.24412
AC090804.1	-0.14274	-1.5843	-0.27737	0.78723	0.90294	-5.7297	-1.1427	-2.6283	-1.0028	-1.0342	-1.6625	-2.0355
AC090945.1	-0.60348	-1.0427	-1.9035	0.086586	0.27527	-4.4287	-0.80828	-0.47303	-1.0655	-1.3491	-1.3477	-1.2124
AC091133.1	-0.4774	-2.1165	-1.0076	0.33777	0.59828	-5.261	-1.8937	-1.6954	-2.0338	-2.7997	-2.6278	-1.6485
AC091633.2	0.50837	-2.432	0.91976	0.37969	0.6358	-5.2258	-2.3932	-3.2804	-1.9135	-2.7997	-2.3762	-1.8291
AC091729.9	-0.071228	1.405	-0.46909	0.64922	0.83119	-6.6269	1.4665	1.5047	1.2435	1.4583	1.4597	1.2974
AC092066.1	-0.022136	1.9555	-0.16033	0.87587	0.94626	-6.8962	2.0038	2.0872	1.9544	1.7651	2.0963	1.8263
AC092106.2	1.2683	-3.55	1.1551	0.27531	0.53684	-4.7999	-3.3443	-6.0877	-2.4699	-3.8993	-3.8502	-1.6485
AC092295.4	0.8268	-2.2778	1.5956	0.14215	0.36981	-4.6005	-3.1638	-1.8398	-2.6505	-2.4587	-2.0659	-1.488
AC092484.1	5.7528	-2.7308	6.4623	7.7744e-05	0.0020543	-0.30843	-7.2512	-4.5028	-1.8025	-2.3143	-0.45023	-0.06355
AC092535.3	-0.7186	0.45925	-2.3404	0.041694	0.17443	-4.0817	0.69714	1.0721	0.73723	0.49306	0.44752	-0.69158
AC092610.12	0.3495	-2.468	0.68964	0.50635	0.73872	-5.3924	-2.7277	-2.6283	-2.857	-2.0628	-2.4965	-2.0355
AC092620.2	-0.69061	-2.0335	-1.1584	0.27402	0.53589	-5.1475	-1.6365	-1.5642	-3.3875	-1.4972	-2.7722	-1.3437
AC092642.1	-0.20131	-0.2633	-0.72169	0.48727	0.72418	-5.9562	-0.17441	-0.35982	-0.40765	0.087802	-0.54435	-0.18139
AC092755.4	-0.79881	-2.1435	-1.2443	0.24219	0.50076	-4.931	-2.4963	-1.0433	-1.9135	-1.4972	-2.4965	-3.414
AC093159.1	-0.020849	-3.6039	-0.02025	0.98425	0.99389	-5.4528	-2.2068	-4.5028	-6.5574	-2.3143	-3.1132	-2.9286
AC093323.3	-0.077387	4.5436	-1.1818	0.26507	0.52687	-6.8412	4.5273	4.6153	4.579	4.584	4.4961	4.46
AC093375.1	-0.0033858	-0.093582	-0.01214	0.99056	0.99634	-6.2964	-0.35641	0.32165	-0.29061	0.034853	-0.14972	-0.12127
AC093382.1	-0.19834	-2.2392	-0.37836	0.71319	0.86573	-5.6612	-1.6365	-2.1808	-1.9135	-3.5367	-1.8908	-2.2765
AC093388.3	0.19852	-1.5601	0.48325	0.63948	0.82537	-5.6814	-1.5788	-2.1808	-1.272	-1.0342	-1.4655	-1.8291
AC093484.4	0.02189	-2.5192	0.033563	0.9739	0.98993	-5.5707	-2.3932	-3.2804	-1.6994	-2.7997	-3.1132	-1.8291
AC093495.4	-0.08003	-1.9923	-0.16633	0.87127	0.94402	-5.6718	-1.7594	-2.6283	-1.8025	-1.4212	-2.0659	-2.2765
AC093616.4	0.12827	2.1632	0.7695	0.45966	0.70263	-6.6371	2.0132	2.193	2.451	1.9693	2.249	2.1032
AC093627.10	-0.14261	-0.0085164	-0.49777	0.62958	0.8201	-6.1442	-0.26254	0.06201	0.51942	0.034853	-0.45023	0.045385
AC093627.9	0.15796	1.1659	0.94852	0.36557	0.62431	-6.1846	1.0931	0.96755	1.3674	1.23	1.2791	1.0584
AC093642.5	0.16585	0.67518	0.63142	0.54215	0.76355	-6.2829	0.41411	0.78263	0.75549	1.0007	0.95146	0.14667
AC093673.5	0.65378	-2.572	1.158	0.27419	0.53616	-4.9538	-2.6074	-3.7658	-2.1651	-2.0628	-2.2652	-2.5661
AC093724.2	0.69779	-2.2626	1.5021	0.16444	0.40345	-4.718	-2.6074	-2.3873	-2.857	-2.3143	-2.0659	-1.3437
AC093818.1	-0.28516	-0.16098	-0.79525	0.44522	0.69146	-5.8043	-0.48304	-0.11046	0.7	0.69427	-0.27862	-1.488
AC093838.4	-0.12981	3.9237	-1.5036	0.16407	0.40319	-6.2939	3.8684	4.0247	3.9573	4.0854	3.7784	3.8282
AC097382.5	0.13972	-1.3333	0.35898	0.72719	0.87234	-5.8405	-1.0614	-2.0003	-1.272	-1.2148	-1.2387	-1.2124
AC097523.1	1.1691	-2.7663	1.8541	0.093882	0.28858	-4.1761	-2.7277	-4.5028	-2.4699	-2.4587	-2.1621	-2.2765
AC097662.2	0.17495	-1.5283	0.47439	0.64557	0.82912	-5.7464	-1.5233	-1.6954	-1.3479	-1.6622	-1.2922	-1.6485
AC097713.5	0.22714	-1.1011	0.60692	0.55764	0.77462	-5.8071	-1.0614	-1.5642	-0.94268	-1.3491	-1.2387	-0.45057
AC097721.1	0.54416	-2.6542	0.56883	0.58222	0.79012	-5.3393	-2.3932	-4.5028	-0.82947	-3.0062	-2.6278	-2.5661
AC097721.2	0.25802	0.29553	1.0101	0.33665	0.59729	-5.8861	0.043394	0.17905	0.071964	0.60627	0.19909	0.67342
AC097724.3	-0.76195	-1.6912	-1.5232	0.15918	0.39488	-4.7279	-1.2739	-2.0003	-0.88497	-1.6622	-2.4965	-1.8291
AC098614.2	0.15722	-2.4406	0.25688	0.80256	0.91149	-5.5636	-2.297	-2.9178	-2.857	-1.5773	-2.0659	-2.9286
AC098820.3	0.42264	-2.7692	0.82477	0.42904	0.67823	-5.2827	-3.0033	-2.3873	-2.857	-3.5367	-2.2652	-2.5661
AC098831.4	0.62706	-3.6487	0.63969	0.53698	0.76002	-5.1506	-4.9293	-3.2804	-2.0338	-4.3847	-3.8502	-3.414
AC099535.4	0.92147	-2.5948	1.3127	0.21906	0.47186	-4.8111	-2.297	-4.5028	-2.4699	-2.3143	-2.4965	-1.488
AC099850.1	0.40492	-0.02063	1.274	0.23192	0.48832	-5.4844	-0.45681	-0.35982	-0.049598	0.45326	-0.27862	0.56781
AC100830.4	-0.399	-2.9433	-0.56688	0.58349	0.79126	-5.3389	-3.1638	-2.0003	-2.4699	-3.2472	-2.6278	-4.151
AC102953.4	-0.60304	-1.9253	-1.366	0.20235	0.45178	-4.8761	-1.8937	-1.6954	-1.8025	-1.4972	-2.6278	-2.0355
AC104297.1	0.15033	-2.5089	0.28944	0.77825	0.89839	-5.5965	-2.4963	-2.1808	-3.098	-2.4587	-1.8908	-2.9286
AC104451.2	-0.72685	-2.7958	-1.1788	0.26619	0.52787	-4.9072	-2.6074	-2.6283	-3.098	-1.9517	-3.5607	-2.9286
AC104532.4	0.53021	-2.2227	1.1796	0.26588	0.52766	-5.0664	-2.6074	-2.1808	-2.6505	-2.1831	-2.0659	-1.6485
AC104843.3	0.134	-0.9866	0.40396	0.69488	0.85542	-5.9043	-1.1427	-1.3328	-0.82947	-0.68425	-1.2387	-0.69158
AC105760.2	0.10398	-0.065683	0.46799	0.64998	0.83133	-6.1919	-0.091355	-0.157	-0.081659	-0.1067	-0.054299	0.096915
AC106782.20	0.30742	-3.0787	0.43353	0.67397	0.84395	-5.3752	-4.0813	-2.1808	-2.857	-3.0062	-2.9326	-3.414
AC107983.4	-0.1405	-1.4454	-0.30749	0.76488	0.89267	-5.825	-0.91138	-2.1808	-1.1311	-1.5773	-1.5282	-1.3437
AC108463.2	0.4232	0.61356	2.3395	0.041758	0.17457	-4.1855	0.3854	0.51218	0.60248	0.4733	0.8441	0.86394
AC108488.4	0.090745	-0.38294	0.35127	0.73279	0.87523	-6.1761	-0.38086	-0.157	-0.40765	-0.82397	-0.14972	-0.37842
AC113189.5	-0.028164	3.0691	-0.22446	0.82699	0.92409	-7.1606	3.0097	2.9319	3.1413	3.292	2.8301	3.2095
AC114271.2	-0.030635	3.0231	-0.24623	0.81056	0.91566	-7.1646	2.9472	3.1242	3.1026	2.9026	2.8762	3.1859
AC114776.1	0.95373	-2.0344	1.7457	0.11193	0.31988	-4.4156	-2.2068	-3.2804	-1.8025	-2.0628	-1.9757	-0.87799
AC115617.2	-0.32564	0.398	-1.5388	0.15535	0.39004	-5.2691	0.44226	0.57047	0.54064	0.64211	0.25604	-0.06355
AC125232.1	-0.2737	1.6547	-1.5007	0.16482	0.40413	-5.7022	1.8599	1.726	1.4142	1.9191	1.6056	1.4036
AC127904.2	-0.17103	0.19422	-0.70544	0.49689	0.73102	-6.0782	-0.012822	0.42006	0.33743	0.55077	-0.0088559	-0.12127
AC129492.6	-0.049297	1.492	-0.33362	0.74566	0.88332	-6.6459	1.33	1.3301	1.8731	1.897	1.3153	1.2065
AC133644.2	-0.29104	-2.5305	-0.56148	0.58703	0.79364	-5.4419	-2.297	-2.6283	-2.857	-2.0628	-2.7722	-2.5661
AC133965.1	-1.5114	-2.7885	-1.7687	0.10787	0.31394	-4.2402	-1.8937	-2.6283	-1.9135	-2.0628	-2.4965	-5.736
AC136289.1	-0.20618	-2.5177	-0.40232	0.69605	0.85612	-5.5721	-2.0418	-2.3873	-2.3095	-3.5367	-2.2652	-2.5661
AC137932.4	0.10498	-1.4794	0.20234	0.84377	0.93244	-5.8281	-1.9658	-0.95845	-0.77603	-1.8486	-1.2922	-2.0355
AC137934.1	-0.036422	-1.5722	-0.083801	0.93489	0.97299	-5.8226	-1.3205	-2.0003	-1.0655	-1.7524	-1.4655	-1.8291
AC138035.2	0.34944	-1.5675	0.89528	0.392	0.64543	-5.4615	-1.9658	-1.5642	-1.6994	-1.4212	-1.6625	-1.0921
AC138783.12	-0.21059	-3.0722	-0.26421	0.79707	0.90897	-5.4283	-2.7277	-3.7658	-3.75	-2.0628	-3.8502	-2.2765
AC138969.4	-0.21257	-1.2897	-0.45292	0.66042	0.83545	-5.7857	-0.74343	-2.1808	-1.1311	-0.87372	-1.4655	-1.3437
AC139100.4	-0.071444	-0.50761	-0.17065	0.86796	0.94266	-6.1447	-0.77549	0.06201	-1.0655	0.061571	-0.45023	-0.87799
AC141586.5	-0.032603	1.6412	-0.23458	0.81935	0.91989	-6.7613	1.5529	1.6605	1.6953	1.8051	1.5383	1.5949
AC142472.6	-0.17309	0.66168	-0.96647	0.35695	0.61618	-6.0351	0.69714	0.80708	0.68101	0.65971	0.55735	0.56781
AC142528.1	0.28385	-1.5697	0.66594	0.52075	0.74885	-5.7009	-1.4183	-1.6954	-2.6505	-1.4972	-1.4655	-0.69158
AC144530.1	0.22452	1.4584	1.3654	0.2025	0.45196	-5.8301	1.4665	1.1314	1.437	1.4683	1.4996	1.7478
AC144652.1	-0.17412	1.3002	-0.97657	0.35217	0.61213	-6.2012	1.4177	1.2251	1.5667	1.1943	1.1448	1.2527
AC145124.2	-0.19123	-1.9705	-0.37216	0.71766	0.86795	-5.6224	-2.4963	-1.3328	-1.6032	-1.6622	-2.1621	-2.5661
AC147651.4	-0.24687	2.2742	-1.8527	0.094099	0.28898	-5.3664	2.358	2.3174	2.506	2.2212	2.0541	2.1888
AC156455.1	-0.27922	2.1431	-1.8976	0.087429	0.27665	-5.2554	2.3129	2.1837	2.2403	2.2962	2.1271	1.6987
AC159540.1	0.36347	2.6374	2.6077	0.026459	0.13125	-4.2387	2.3129	2.463	2.8285	2.9099	2.861	2.4489
AC159540.14	0.52079	-1.6655	1.0881	0.30246	0.56371	-5.2093	-1.5788	-2.9178	-1.1311	-1.3491	-1.5282	-1.488
ACAA1	0.044134	5.2786	0.44058	0.66903	0.84105	-7.6009	5.3274	5.2538	5.2743	5.223	5.4889	5.104
ACAA2	-0.12253	6.4683	-1.5577	0.15085	0.3831	-6.6817	6.5689	6.4824	6.5415	6.4436	6.5185	6.2552
ACACA	-0.06446	6.6247	-1.0419	0.32236	0.58367	-7.3295	6.7143	6.6302	6.5877	6.6174	6.6872	6.5117
ACACB	0.10206	3.1851	1.0457	0.3207	0.58205	-6.6356	3.0261	2.9757	3.5287	3.3769	3.1284	3.0746
ACAD10	-0.12597	4.8918	-2.1008	0.06243	0.22406	-5.6196	4.895	4.9087	5.0177	4.9689	4.7584	4.8022
ACAD11	-0.051477	0.62234	-0.25482	0.80411	0.91225	-6.4707	0.48348	0.80708	0.56155	0.71124	0.46373	0.70697
ACAD8	0.025043	4.6527	0.3854	0.70814	0.86322	-7.5077	4.6349	4.6563	4.6563	4.6046	4.6314	4.7326
ACAD9	-0.094359	6.2025	-1.9218	0.084021	0.27018	-6.1213	6.2688	6.2668	6.1839	6.1383	6.1503	6.2069
ACADM	0.056774	6.5739	1.0615	0.31381	0.57532	-7.3041	6.5938	6.5249	6.5852	6.5121	6.6577	6.5698
ACADS	0.0080157	3.2131	0.069814	0.94574	0.977	-7.2399	3.0628	3.3322	3.2516	3.2226	3.0871	3.322
ACADSB	0.13518	4.4433	1.8299	0.097674	0.29537	-5.9663	4.4039	4.427	4.4235	4.3588	4.6088	4.4377
ACADVL	-0.011515	8.2146	-0.21035	0.83768	0.9293	-8.0231	8.1603	8.1876	8.3106	8.2869	8.0837	8.2583
ACAP1	-0.19006	5.3576	-2.7479	0.020835	0.11208	-4.6186	5.3466	5.3126	5.5812	5.5698	5.0664	5.2689
ACAP2	0.41997	7.8319	10.531	1.1256e-06	0.00010468	5.5114	7.5865	7.6067	7.8768	7.8931	8.0247	8.0039
ACAP2-IT1	0.20643	0.34533	0.78382	0.45159	0.69648	-6.088	-0.11167	0.57047	0.2881	0.65971	0.2928	0.37255
ACAP3	0.045909	4.8377	0.44787	0.66395	0.83798	-7.5059	4.7207	4.7757	4.9138	4.9368	4.6448	5.0347
ACAT1	-0.13599	7.3709	-3.0123	0.01329	0.082449	-4.4411	7.4866	7.4799	7.3094	7.2641	7.3809	7.3048
ACAT2	0.019688	8.0614	0.44464	0.6662	0.83943	-7.9267	8.0176	8.014	8.1762	8.0955	8.0595	8.0056
ACBD3	0.2557	5.5328	4.7471	0.00081858	0.01162	-1.3195	5.4263	5.4577	5.4702	5.4686	5.7237	5.6504
ACBD4	-0.054253	2.95	-0.53865	0.6021	0.80296	-6.9891	2.869	2.8694	3.2386	3.0894	2.8112	2.8224
ACBD5	-0.061739	4.7334	-1.0138	0.33495	0.59576	-7.065	4.7406	4.7941	4.7182	4.742	4.6912	4.7142
ACBD6	0.031698	5.6464	0.57257	0.57978	0.78843	-7.5916	5.6108	5.7119	5.6047	5.5814	5.6827	5.6866
ACBD7	0.29815	2.2517	2.489	0.032391	0.14909	-4.3469	2.0864	1.9944	2.3585	2.4201	2.4041	2.247
ACCS	0.18862	3.3876	2.2363	0.049716	0.19532	-5.055	3.2235	3.1907	3.5603	3.573	3.4239	3.3541
ACD	-0.082231	4.7294	-1.0066	0.33823	0.59878	-7.0762	4.8091	4.738	4.6708	4.6895	4.6061	4.863
ACE	-0.53752	-3.5963	-0.54298	0.59922	0.80128	-5.2354	-3.5508	-3.7658	-3.75	-3.2472	-5.4351	-1.8291
ACE2	-0.61901	-2.3787	-0.86619	0.407	0.65937	-5.2629	-1.4699	-3.2804	-1.513	-2.7997	-2.9326	-2.2765
ACER2	0.047932	2.6986	0.35109	0.73292	0.87524	-7.0431	2.6839	2.7918	2.6642	2.6749	2.918	2.4588
ACER3	0.17205	4.6565	2.7694	0.020085	0.10964	-4.4611	4.5207	4.4736	4.8029	4.7857	4.6669	4.6892
ACHE	-1.0038	3.433	-8.5341	7.3845e-06	0.00038091	4.0854	3.8632	3.8296	3.4884	3.573	2.7061	3.1375
ACIN1	-0.02672	8.2109	-0.66972	0.51844	0.74712	-7.8106	8.2577	8.219	8.1894	8.1769	8.2317	8.1908
ACKR1	-1.0934	2.6341	-7.9528	1.3641e-05	0.00058704	3.5664	3.0583	3.39	2.625	2.5578	2.07	2.1032
ACKR2	-0.53125	-1.4847	-0.93764	0.37086	0.62871	-5.3737	-0.74343	-2.3873	-1.1311	-0.77588	-1.5938	-2.2765
ACLY	-0.033324	9.0452	-0.61601	0.55187	0.77078	-7.9165	9.0644	9.0634	9.0615	9.0017	8.9524	9.1276
ACO1	0.41808	6.4737	8.6852	6.3293e-06	0.00034529	3.7679	6.2729	6.2892	6.4516	6.4222	6.6681	6.7385
ACO2	-0.16398	7.3926	-3.1757	0.010084	0.068736	-4.1623	7.491	7.556	7.3292	7.2544	7.3106	7.4146
ACOT1	0.013834	2.0017	0.086679	0.93266	0.97174	-6.9136	2.0639	1.8489	1.9061	2.0179	1.8595	2.3139
ACOT11	-0.1287	-2.081	-0.27518	0.78887	0.90384	-5.5788	-2.3932	-2.3873	-1.4281	-1.2148	-2.4965	-2.5661
ACOT13	-0.032032	5.8154	-0.5654	0.58446	0.79181	-7.6228	5.8685	5.8899	5.7558	5.712	5.8949	5.7713
ACOT2	0.112	4.1352	1.1028	0.29633	0.55773	-6.8314	4.0103	3.9716	4.2248	4.2828	3.9876	4.3341
ACOT4	0.77144	1.3696	5.0969	0.00048979	0.0080554	0.096926	0.83092	0.94569	1.5459	1.5742	1.6056	1.7152
ACOT7	-0.14232	4.854	-2.2605	0.04773	0.19012	-5.3682	4.9488	4.9642	4.8029	4.8155	4.8561	4.7367
ACOT8	-0.050988	4.3086	-0.72365	0.48612	0.72343	-7.2277	4.3058	4.3142	4.3975	4.2983	4.2344	4.3016
ACOT9	-0.037431	5.4944	-0.64733	0.53222	0.7579	-7.5219	5.6128	5.4949	5.4051	5.4009	5.5295	5.5232
ACOX1	-0.3286	6.3912	-6.9085	4.4935e-05	0.0014076	1.6724	6.5586	6.5631	6.4097	6.3499	6.2277	6.2381
ACOX3	-0.013099	3.8469	-0.12758	0.90105	0.95834	-7.3976	3.7925	3.8795	3.8295	3.8509	3.695	4.0339
ACP1	-0.068872	6.823	-1.35	0.20724	0.45729	-7.0009	6.9002	6.8872	6.8058	6.7032	6.8535	6.7883
ACP2	0.026186	4.296	0.35698	0.72864	0.8733	-7.4495	4.3058	4.3248	4.1594	4.2742	4.299	4.4125
ACP5	-0.00045072	1.083	-0.0025413	0.99802	0.99921	-6.5293	0.70878	0.70668	1.8647	1.8594	0.7547	0.60387
ACP6	0.56585	2.2591	4.0914	0.0022472	0.024205	-1.6328	1.8442	1.801	2.6786	2.5484	2.4936	2.1888
ACPP	-0.064883	7.0513	-1.2392	0.24402	0.5025	-7.1187	6.7372	6.741	7.7781	7.7208	6.7221	6.6086
ACRBP	0.3327	-1.7423	0.71978	0.4884	0.72499	-5.523	-1.8937	-2.1808	-2.0338	-1.0342	-1.6625	-1.6485
ACRC	0.094559	0.67637	0.51038	0.62104	0.81436	-6.4037	0.63752	0.80708	0.47603	0.64211	0.85643	0.63906
ACSBG1	-1.2721	5.0206	-19.602	3.2527e-09	2.0597e-06	11.907	5.5827	5.6825	5.1004	5.0653	4.3642	4.3288
ACSF2	0.5132	1.9717	2.712	0.022151	0.11699	-3.9084	1.5593	1.764	2.2596	1.813	2.0051	2.4289
ACSF3	-0.12559	4.1042	-1.7116	0.11825	0.33099	-6.0399	4.0735	4.0984	4.292	4.2219	3.929	4.0105
ACSL1	-0.42762	6.1718	-7.5262	2.1877e-05	0.00082354	2.4876	6.3066	6.2249	6.4561	6.3549	5.8427	5.8457
ACSL3	0.0023671	7.0752	0.053225	0.95862	0.98319	-7.9433	7.096	7.072	7.0771	7.0364	7.1072	7.0623
ACSL4	0.2574	7.5301	5.8655	0.00016842	0.003602	0.14497	7.3542	7.3001	7.6968	7.6587	7.6031	7.5677
ACSL5	0.1184	5.5575	2.0347	0.069706	0.24026	-5.8429	5.4533	5.4324	5.7248	5.615	5.5754	5.5442
ACSM1	0.37077	-2.6502	0.61497	0.55253	0.77142	-5.3195	-3.0033	-3.2804	-2.1651	-1.6622	-2.3762	-3.414
ACSM3	0.16114	4.8683	2.4376	0.035351	0.15781	-5.0723	4.7873	4.7538	4.8778	4.9512	4.9803	4.8593
ACSS1	-0.1613	6.8033	-1.8757	0.090625	0.28263	-6.2569	6.8647	6.8764	6.8792	6.8334	6.8521	6.514
ACSS2	-0.39932	5.7494	-6.9234	4.4137e-05	0.0013951	1.7901	5.8443	5.8067	5.9571	6.0044	5.3859	5.4982
ACTA1	-0.024994	-1.7055	-0.062223	0.95163	0.97953	-5.8105	-1.5233	-2.0003	-1.9135	-1.4972	-1.8106	-1.488
ACTA2	0.021838	-2.0822	0.044513	0.96539	0.9863	-5.702	-2.3932	-1.6954	-1.6032	-2.4587	-2.0659	-2.2765
ACTB	0.0087975	11.959	0.23083	0.82218	0.92132	-8.3083	11.946	12.002	11.936	11.9	11.939	12.031
ACTBP11	-1.6518	-2.8807	-2.3961	0.037935	0.16525	-3.5024	-2.1219	-2.6283	-2.6505	-2.6192	-4.6982	-2.5661
ACTBP2	0.030414	0.99949	0.11182	0.91321	0.96399	-6.621	1.0014	0.78263	0.95831	0.95872	0.63097	1.6649
ACTBP9	-0.087072	-0.87899	-0.22091	0.82968	0.92557	-5.9871	-0.98444	-1.1335	-1.0028	-0.19882	-1.3477	-0.60669
ACTG1	0.49127	9.5286	14.065	7.6839e-08	1.7693e-05	8.2886	9.2289	9.2461	9.6356	9.6054	9.7294	9.7263
ACTG1P1	0.19996	-2.7543	0.32479	0.75214	0.88572	-5.4964	-3.5508	-2.0003	-2.857	-2.6192	-2.9326	-2.5661
ACTG1P14	-0.3715	-0.58048	-1.0148	0.33448	0.59527	-5.5657	-0.62187	-0.35982	-0.58011	0.13888	-0.7163	-1.3437
ACTG1P17	-0.10583	-1.0097	-0.26467	0.79673	0.90883	-5.9176	-0.74343	-1.5642	-0.67475	-0.55687	-0.87034	-1.6485
ACTG1P20	-0.041101	-0.62066	-0.14725	0.88591	0.95097	-6.0899	-0.80828	-0.53315	-0.40765	-0.43983	-0.7533	-0.78178
ACTG1P23	-0.66647	-2.7282	-0.85127	0.41485	0.66654	-5.232	-1.8937	-3.2804	-3.75	-1.8486	-3.5607	-2.0355
ACTG1P24	-1.1409	-3.1496	-1.4911	0.16728	0.40745	-4.5204	-2.297	-3.7658	-2.0338	-2.7997	-3.8502	-4.151
ACTG1P3	-0.53438	-0.26663	-1.8216	0.099001	0.29806	-4.7213	0.19998	-0.157	-0.53502	-0.020113	-0.30584	-0.78178
ACTL10	-0.083284	1.2781	-0.35671	0.72884	0.87341	-6.6192	1.0842	1.4121	1.1221	1.6198	0.92828	1.5024
ACTL6A	-0.019409	6.7361	-0.39493	0.70132	0.85924	-7.8276	6.803	6.7859	6.6725	6.6157	6.8127	6.7268
ACTL8	-0.72031	-1.1447	-2.104	0.062094	0.22349	-4.1346	-0.48304	-0.73019	-1.1311	-1.8486	-1.1872	-1.488
ACTN1	3.2708	1.7791	15.965	2.3168e-08	8.0541e-06	9.1927	0.043394	-0.11046	2.1671	2.1545	3.3712	3.0487
ACTN2	-0.18483	2.1826	-1.296	0.22452	0.47847	-6.0964	2.2937	2.2023	2.2912	2.3018	2.2111	1.7954
ACTN4	-0.33426	7.9202	-7.575	2.0707e-05	0.00080159	2.3598	8.094	8.0575	7.9594	7.9147	7.7104	7.785
ACTR10	-0.13882	5.2383	-1.8876	0.088886	0.27926	-6.0247	5.341	5.2911	5.3149	5.1564	5.24	5.0866
ACTR1A	-0.0361	6.5842	-0.78507	0.45089	0.69593	-7.5694	6.6748	6.6632	6.4431	6.4477	6.6085	6.6678
ACTR1B	0.081153	5.5298	1.2439	0.24233	0.50093	-6.957	5.4756	5.4902	5.5344	5.5135	5.4904	5.675
ACTR2	0.19837	8.5048	1.7283	0.11512	0.32573	-6.6442	8.4902	8.4196	8.4629	8.3956	8.8692	8.3915
ACTR3	0.098058	8.1067	2.5285	0.030283	0.14251	-5.3338	8.0927	8.0657	8.0606	8.0658	8.187	8.1682
ACTR3B	0.053133	3.457	0.65883	0.52511	0.75301	-7.0827	3.4826	3.4299	3.4127	3.4006	3.5355	3.4808
ACTR3C	0.3284	2.2704	2.519	0.030781	0.14377	-4.3014	2.1603	1.8838	2.4622	2.3622	2.4291	2.3247
ACTR5	-0.090059	4.3473	-1.2303	0.24717	0.50658	-6.7619	4.4822	4.4031	4.2	4.2293	4.3092	4.46
ACTR6	0.12251	4.4549	1.7719	0.10731	0.31282	-6.0526	4.4366	4.3788	4.4808	4.3722	4.555	4.506
ACTR8	0.067582	5.1274	1.2027	0.25723	0.51824	-6.9436	5.1371	5.132	5.0697	5.0141	5.1927	5.2189
ACTRT3	0.034167	0.62443	0.15863	0.87717	0.9468	-6.5187	0.91368	0.388	0.58216	0.3702	0.81912	0.67342
ACVR1	-0.012662	1.4828	-0.083709	0.93497	0.973	-6.7471	1.4869	1.4745	1.5248	1.5742	1.5611	1.2753
ACVR1B	0.23426	5.4392	4.301	0.0016166	0.019181	-2.0203	5.3461	5.3222	5.4138	5.3963	5.5434	5.6133
ACVR2A	0.28558	1.8212	2.1646	0.056094	0.21032	-4.7786	1.7346	1.6196	1.8897	1.7405	1.9995	1.9435
ACVR2B	-0.10666	3.7633	-1.375	0.1996	0.44832	-6.4205	3.7732	3.7499	3.9072	3.8585	3.6847	3.6061
ACVR2B-AS1	0.39226	-2.3302	0.60724	0.55744	0.7745	-5.4322	-2.3932	-2.9178	-2.6505	-1.2803	-1.8106	-2.9286
ACY1	-0.010375	0.39586	-0.046859	0.96356	0.98513	-6.4303	0.31102	0.32165	0.47603	0.45326	0.13979	0.67342
ACYP1	0.16105	2.9008	1.4065	0.19037	0.43659	-6.1672	2.9124	2.6368	2.9798	2.9676	3.0257	2.8824
ACYP2	0.10014	1.7267	0.69498	0.50314	0.73621	-6.5379	1.5136	1.5343	2.061	1.9336	1.5536	1.7639
AD000864.6	0.40084	-1.3283	0.85376	0.41353	0.6653	-5.5519	-1.3686	-1.8398	-0.58011	-1.9517	-1.1374	-1.0921
ADA	1.5567	-2.3787	3.3076	0.00808	0.058713	-2.2844	-3.1638	-2.9178	-2.857	-2.4587	-1.6625	-1.2124
ADAL	0.0032963	4.121	0.045419	0.96468	0.98581	-7.4727	4.187	4.0759	4.0856	4.0935	4.1667	4.1173
ADAM10	0.16888	6.3081	1.9717	0.077378	0.25663	-6.0561	6.2747	6.1945	6.3051	6.309	6.5418	6.2237
ADAM11	1.4406	-2.7506	2.0134	0.072217	0.24545	-3.9888	-4.4439	-2.6283	-2.857	-2.3143	-2.7722	-1.488
ADAM15	-0.031383	6.5048	-0.44282	0.66747	0.8403	-7.7704	6.4823	6.4738	6.5865	6.5518	6.3434	6.5913
ADAM17	0.15169	5.6153	2.7211	0.021809	0.1156	-4.7317	5.5591	5.5966	5.5599	5.5452	5.7668	5.6644
ADAM20	-0.70176	-2.0099	-1.5383	0.15547	0.3901	-4.6676	-1.7594	-1.6954	-2.1651	-1.4972	-2.3762	-2.5661
ADAM20P1	1.0986	-3.0478	0.99011	0.34583	0.60589	-4.9505	-2.4963	-6.0877	-1.513	-2.0628	-1.9757	-4.151
ADAM22	0.45634	2.877	4.784	0.0007748	0.011178	-0.73478	2.7642	2.6969	2.7117	2.7343	3.2361	3.1189
ADAM32	0.11017	1.8727	0.7347	0.47966	0.71792	-6.5753	1.8547	1.7388	1.9385	1.9904	2.0487	1.6649
ADAM8	-1.0934	3.5634	-6.2336	0.00010397	0.0025011	1.304	3.7649	4.0556	3.7924	3.979	2.5555	3.2327
ADAM9	0.15648	6.0022	3.1175	0.011123	0.07328	-4.1116	5.9986	5.9907	5.8325	5.8954	6.169	6.127
ADAMTS10	0.69311	-0.30568	1.9593	0.078991	0.25971	-4.5107	-1.1427	-0.065369	-0.4913	0.087802	-0.10122	-0.12127
ADAMTS13	0.33471	-2.4371	0.55356	0.59223	0.7969	-5.4537	-1.9658	-3.7658	-2.1651	-2.3143	-2.3762	-2.0355
ADAMTS17	0.30818	-3.6138	0.39525	0.70109	0.85916	-5.187	-4.9293	-3.7658	-2.1651	-2.4587	-4.2127	-4.151
ADAMTS19	0.63948	-0.71107	2.0544	0.067452	0.23602	-4.253	-1.0224	-1.2298	-0.32857	-0.59809	-0.30584	-0.78178
ADAMTS3	-0.19588	5.2258	-3.0023	0.013516	0.083356	-4.177	5.3879	5.2359	5.2471	5.2326	5.147	5.104
ADAMTS6	0.36299	1.2482	2.2702	0.046956	0.18823	-4.4336	0.97278	1.0103	1.2944	1.5077	1.3419	1.3621
ADAMTS9	1.791	-1.8328	4.0638	0.0023477	0.025038	-1.2219	-2.8589	-2.0003	-2.1651	-2.1831	-0.57714	-1.2124
ADAMTSL2	-0.7869	-0.072689	-2.9805	0.014028	0.08582	-2.9338	0.24862	-0.021648	0.18407	0.1882	-0.79126	-0.24412
ADAMTSL4	-1.0725	2.1168	-7.3597	2.6447e-05	0.00096285	2.9767	2.4016	2.6231	2.3344	2.4906	1.3679	1.4832
ADAMTSL4-AS1	0.41926	0.031819	1.7412	0.11275	0.32141	-4.9355	-0.26254	0.10209	-0.018234	-0.020113	0.39777	-0.0080546
ADAMTSL5	-0.164	2.5676	-1.3711	0.20078	0.44982	-6.1438	2.5958	2.8222	2.4788	2.4201	2.4455	2.6434
ADAP1	-0.10793	0.18089	-0.4607	0.65503	0.83323	-6.2211	0.26447	-0.11046	0.38512	0.53179	0.077949	-0.06355
ADAR	-0.049084	7.7502	-1.1265	0.28667	0.54805	-7.3581	7.8211	7.8418	7.6379	7.6281	7.7445	7.8278
ADARB1	0.29922	4.5726	4.4626	0.0012593	0.016156	-1.6026	4.4566	4.4071	4.5993	4.5216	4.7682	4.6829
ADAT1	0.028772	3.9454	0.33937	0.74146	0.88081	-7.3775	4.0463	3.8679	3.9031	3.8081	3.9806	4.0665
ADAT2	-0.024177	6.0778	-0.47384	0.64595	0.82924	-7.7071	6.1136	6.1086	6.0418	6.0447	6.1238	6.0343
ADAT3	-0.1078	1.4125	-0.64879	0.53132	0.75744	-6.4776	1.1959	1.4897	1.6472	1.6985	1.1246	1.3193
ADCK1	-0.29214	3.6725	-3.0801	0.01185	0.076371	-3.733	3.8142	3.908	3.4884	3.6432	3.4847	3.6966
ADCK2	-0.0071573	3.9231	-0.081448	0.93672	0.9733	-7.418	3.9181	3.8708	3.9514	3.9345	3.8104	4.0536
ADCK3	-0.28534	6.1136	-2.785	0.019559	0.10763	-4.6811	6.2019	6.1927	6.1885	6.1914	5.7408	6.166
ADCK4	-0.14174	5.1311	-1.6487	0.13071	0.35154	-6.3502	5.1344	5.1477	5.1794	5.253	4.8857	5.1866
ADCK5	-0.26533	3.8843	-2.0869	0.063896	0.22752	-5.4288	3.9143	4.0063	3.9214	3.9363	3.5103	4.0172
ADCY1	0.45871	-1.5774	1.0039	0.33945	0.59998	-5.3479	-2.297	-1.2298	-1.1311	-1.7524	-1.4054	-1.6485
ADCY10P1	-0.061388	1.3134	-0.32906	0.74901	0.88446	-6.6341	1.3962	1.2432	1.3792	1.4881	1.4516	0.92224
ADCY3	-0.27448	5.2434	-3.2083	0.009545	0.066081	-3.8316	5.3596	5.4363	5.2244	5.1361	5.0061	5.2981
ADCY7	-0.033836	7.6731	-0.49131	0.63398	0.82236	-7.8734	7.6886	7.7281	7.6059	7.6414	7.5625	7.812
ADCY9	0.59336	-0.43584	2.2244	0.050727	0.19789	-4.0633	-0.74343	-0.95845	-0.21754	-0.16745	-0.14972	-0.37842
ADD1	-0.056518	7.7482	-1.3334	0.21243	0.46402	-7.1097	7.7737	7.7701	7.7776	7.7307	7.6928	7.7444
ADD2	-0.33302	8.3501	-4.9411	0.00061438	0.0094394	-1.3166	8.5894	8.525	8.3134	8.2449	8.3329	8.0948
ADD3	1.0163	5.9935	15.636	2.8242e-08	8.923e-06	9.6091	5.5068	5.4096	6.0731	6.03	6.5499	6.3917
ADGRA2	0.75487	-0.12608	2.8831	0.016551	0.096563	-3.0955	-0.59301	-0.66147	-0.148	0.25917	0.056732	0.33011
ADGRA3	0.10175	4.3339	1.6011	0.14093	0.36794	-6.2936	4.3994	4.3971	4.0783	4.1255	4.4971	4.506
ADGRB1	0.048757	-1.8718	0.10765	0.91644	0.96545	-5.7255	-1.8937	-2.3873	-1.6994	-1.4972	-2.2652	-1.488
ADGRD2	-0.01348	1.3448	-0.079925	0.9379	0.97337	-6.7161	1.2684	1.5047	1.2174	1.4783	1.3935	1.2065
ADGRE2	-0.2638	4.8415	-3.1815	0.0099854	0.068329	-3.7951	4.9797	4.9655	4.9138	4.8456	4.81	4.5343
ADGRE5	0.057208	5.9636	0.9588	0.36062	0.61966	-7.3266	5.8917	5.9726	6.0094	5.9669	6.036	5.9047
ADGRF3	0.52951	-1.4065	1.5692	0.14816	0.37873	-4.7968	-1.6966	-1.5642	-1.513	-1.4972	-1.1872	-0.98109
ADGRG1	-0.99547	4.1637	-8.2524	9.9014e-06	0.00046076	3.6528	4.5363	4.5767	4.306	4.2828	3.3819	3.8988
ADGRL1	0.55329	2.5495	5.0069	0.00055806	0.0087795	-0.30197	2.3356	2.2023	2.5847	2.4558	2.8144	2.9043
ADGRL2	0.81851	-3.8461	0.54846	0.59559	0.79933	-5.1026	-7.2512	-2.1808	-2.0338	-3.2472	-5.4351	-2.9286
ADGRL3	2.2964	-2.4792	3.1283	0.010923	0.072452	-2.579	-3.3443	-4.5028	-1.3479	-2.3143	-1.0893	-2.2765
ADGRV1	0.031931	-2.0084	0.057478	0.95531	0.98154	-5.7462	-2.1219	-1.8398	-1.272	-3.0062	-2.1621	-1.6485
ADH5	0.11177	6.8897	2.5743	0.028012	0.13625	-5.142	6.853	6.8818	6.8313	6.8195	6.9839	6.969
ADH5P4	-0.1288	-1.4932	-0.32896	0.74908	0.88446	-5.7988	-1.2739	-1.6954	-1.6032	-1.152	-1.4054	-1.8291
ADHFE1	0.67861	-0.30056	1.9881	0.075312	0.25194	-4.4413	-0.33236	-1.4439	0.12911	-0.19882	-0.054299	0.096915
ADI1	-0.04598	6.6239	-0.93305	0.37311	0.63039	-7.4422	6.7101	6.702	6.5326	6.4917	6.7001	6.6069
ADIPOR1	-0.34145	6.5499	-7.0673	3.7185e-05	0.0012398	1.8566	6.7224	6.7583	6.5355	6.4812	6.3748	6.4274
ADIPOR2	-0.043397	6.9323	-0.92391	0.37762	0.63372	-7.4797	7.0008	6.9268	6.9273	6.8936	6.9378	6.9072
ADIRF	1.7292	-2.5953	2.6306	0.025446	0.12785	-3.2024	-3.0033	-4.5028	-1.8025	-2.7997	-1.9757	-1.488
ADIRF-AS1	0.61582	2.5521	5.9051	0.00015976	0.0034542	1.0073	2.1979	2.2654	2.5949	2.5578	2.8144	2.8824
ADK	0.083786	5.9604	1.1508	0.27699	0.53842	-7.1313	5.9777	5.9224	5.867	5.9607	6.1295	5.9047
ADM	2.9875	-3.7455	3.1103	0.01126	0.073722	-2.907	-7.2512	-4.5028	-2.3095	-2.0628	-2.9326	-3.414
ADM2	-0.042951	-0.13401	-0.18181	0.85942	0.93975	-6.2529	-0.051554	-0.30638	-0.018234	-0.1067	-0.1999	-0.12127
ADM5	-0.28838	1.8367	-1.8365	0.096622	0.2935	-5.2715	1.8122	2.0467	1.9544	1.867	1.4837	1.8565
ADNP	0.12967	6.0814	2.6095	0.026381	0.13091	-4.9865	6.0544	6.0263	6.006	6.063	6.1849	6.1539
ADNP2	0.010957	7.1828	0.24844	0.8089	0.91487	-7.924	7.1997	7.209	7.1369	7.1137	7.1873	7.2504
ADNP-AS1	-0.34029	-1.4997	-0.78464	0.45114	0.69596	-5.5148	-1.4183	-1.8398	-0.88497	-1.3491	-2.1621	-1.3437
ADO	0.15531	4.8735	1.6364	0.13328	0.35515	-6.3332	4.7442	4.8584	4.7941	4.8751	4.825	5.1444
ADORA2A	0.65911	-2.2578	1.1132	0.29207	0.55337	-5.0523	-3.3443	-2.3873	-1.6032	-1.9517	-2.7722	-1.488
ADORA2B	-0.0678	4.775	-1.0501	0.31877	0.58026	-7.0279	4.7921	4.757	4.8819	4.8243	4.746	4.6488
ADPGK	0.068479	6.0625	1.4395	0.18105	0.42551	-6.7924	6.0335	6.0354	6.0502	6.0464	6.0935	6.1162
ADPGK-AS1	0.58706	-1.7363	1.468	0.17332	0.41638	-4.8324	-1.825	-2.3873	-1.8025	-1.6622	-1.5282	-1.2124
ADPRH	1.1637	0.16224	4.924	0.00062992	0.0095784	0.0063778	-0.48304	-0.59588	0.54064	0.1882	0.61654	0.70697
ADPRHL1	0.36236	-1.3495	1.0609	0.31409	0.57565	-5.3933	-1.4183	-1.4439	-1.272	-1.7524	-0.99772	-1.2124
ADPRHL2	-0.014746	4.8519	-0.18575	0.85642	0.93834	-7.6112	4.8017	4.9546	4.8138	4.7957	4.7731	4.9722
ADPRM	0.034086	2.8448	0.34017	0.74087	0.88035	-7.086	2.887	2.7483	2.798	2.8689	2.8549	2.9115
ADRB2	0.018807	-1.83	0.036803	0.97138	0.98872	-5.708	-2.0418	-2.0003	-0.88497	-1.7524	-1.7347	-2.5661
ADRM1	-0.2807	6.5444	-3.0397	0.012688	0.079912	-4.309	6.685	6.7817	6.4042	6.4439	6.2963	6.655
ADSL	-0.12561	7.6072	-2.7342	0.021326	0.11405	-4.941	7.6853	7.7409	7.5527	7.4884	7.5593	7.6168
ADSS	0.05835	6.2171	1.2429	0.24268	0.50125	-7.0639	6.255	6.235	6.1148	6.0933	6.3166	6.2881
ADSSL1	-0.25098	-0.97617	-0.74996	0.47083	0.71126	-5.7006	-0.94745	-0.95845	-0.4913	-0.97869	-1.1374	-1.3437
AE000661.37	2.345	2.6896	17.381	1.0305e-08	4.9609e-06	10.463	1.3524	1.1884	3.2707	3.0632	3.6655	3.5972
AE000662.92	0.050639	-1.1996	0.12345	0.90424	0.95976	-5.8882	-1.0614	-1.8398	-0.58011	-0.97869	-1.0893	-1.6485
AEBP2	0.21143	4.9561	2.4337	0.035589	0.15842	-5.0996	4.8963	4.8289	5.0167	4.9003	5.1823	4.9124
AEN	-0.30065	5.8938	-4.4234	0.0013376	0.01689	-1.896	6.1662	6.0937	5.653	5.7423	5.7582	5.9492
AES	0.30613	6.804	5.1073	0.00048246	0.0079734	-0.91498	6.5871	6.7138	6.8115	6.7958	6.8905	7.0254
AF001548.5	0.23413	-0.37554	0.81065	0.43673	0.68475	-5.8594	-0.62187	-0.30638	-0.4913	-0.077257	-0.14972	-0.60669
AF011889.2	-1.4925	-1.9667	-3.0605	0.012248	0.078173	-2.6235	-1.4699	-1.5642	-1.4281	-1.152	-2.7722	-3.414
AF011889.5	-0.32885	-1.8747	-0.68554	0.50883	0.74096	-5.5163	-2.0418	-1.3328	-1.3479	-2.1831	-2.0659	-2.2765
AF127936.3	-0.048288	1.0425	-0.29272	0.77581	0.89773	-6.5695	1.0295	0.94569	1.1221	1.1943	0.90473	1.0584
AF127936.7	-1.4237	-2.999	-2.4398	0.035221	0.15754	-3.4475	-2.4963	-1.8398	-3.3875	-3.0062	-3.8502	-3.414
AF127936.9	1.0615	-1.0178	2.4533	0.03442	0.15517	-3.5908	-1.3205	-2.1808	-1.272	-0.51679	-0.7533	-0.06355
AF129075.5	-0.11807	0.19733	-0.54268	0.59942	0.80143	-6.2212	0.14965	0.35521	0.10082	0.32681	0.056732	0.19476
AF129408.17	-0.1288	-1.1505	-0.35233	0.73201	0.87515	-5.9162	-1.1427	-1.1335	-1.4281	-0.97869	-1.5282	-0.69158
AF131215.2	0.06496	3.3243	0.63071	0.5426	0.76365	-7.0347	3.2031	3.2274	3.5628	3.4918	3.3669	3.0937
AF131215.3	-0.10275	1.1978	-0.28699	0.78007	0.89903	-6.5805	1.1282	1.4121	1.3068	1.6814	1.6129	0.045385
AF131215.4	-0.11002	0.8522	-0.29894	0.7712	0.89549	-6.4312	0.60052	0.96755	1.1908	1.6814	1.0514	-0.37842
AF131215.8	0.20639	-0.64797	0.71254	0.49268	0.72836	-5.8397	-0.74343	-0.87828	-0.53502	-0.40283	-0.45023	-0.87799
AF131215.9	0.060257	2.4537	0.54068	0.60075	0.80199	-6.8756	2.4016	2.4319	2.4454	2.5484	2.5171	2.3778
AF131217.1	0.7933	-2.4009	1.39	0.19517	0.4428	-4.7705	-3.5508	-2.1808	-2.0338	-2.3143	-2.4965	-1.8291
AF146191.4	-0.14843	-1.242	-0.37772	0.71365	0.8661	-5.8486	-1.0614	-1.6954	-1.0028	-1.152	-1.6625	-0.87799
AF196970.3	-0.92146	-0.40993	-2.7808	0.019698	0.10823	-3.1718	0.097502	-0.157	-0.32857	0.061571	-0.64504	-1.488
AF196972.4	0.014534	-2.3737	0.02461	0.98086	0.99252	-5.612	-2.0418	-3.2804	-2.4699	-1.8486	-2.7722	-1.8291
AFAP1L1	3.017	-1.2022	5.8841	0.0001643	0.0035352	0.91967	-2.7277	-2.6283	-1.1311	-0.97869	0.63097	-0.37842
AFF1	0.067858	7.3674	1.0552	0.31655	0.57823	-7.3924	7.3224	7.3175	7.3488	7.4127	7.2941	7.5085
AFF2	4.9362	-2.6512	6.5793	6.7169e-05	0.0018666	0.62029	-5.6663	-3.2804	-4.2355	-3.2472	-0.0088559	0.53081
AFF4	-0.02179	6.1796	-0.3989	0.69848	0.85764	-7.7513	6.1681	6.1893	6.1981	6.2335	6.2056	6.083
AFG3L1P	-0.13677	4.458	-1.9712	0.077455	0.25677	-5.7481	4.5741	4.5094	4.4657	4.4039	4.4501	4.3448
AFG3L2	-0.066909	7.9849	-1.572	0.14751	0.37784	-6.8199	8.0445	8.0411	7.976	7.8953	7.9755	7.9769
AFG3L2P1	-0.63821	-2.7596	-1.0739	0.3085	0.56991	-5.0331	-2.8589	-1.6954	-2.857	-2.7997	-2.9326	-3.414
AFMID	-0.05685	4.9802	-0.62874	0.54383	0.76464	-7.442	5.1424	4.9491	4.9269	4.9113	5.1069	4.8443
AFTPH	-0.0047927	5.9759	-0.095317	0.92598	0.96945	-7.807	5.9849	5.9604	5.9979	5.9845	5.9952	5.9325
AGA	0.031773	3.7413	0.40646	0.6931	0.85445	-7.2866	3.7109	3.734	3.7612	3.7762	3.7897	3.6755
AGAP1	-0.17334	6.6076	-3.7623	0.0038126	0.034844	-3.0622	6.6285	6.6047	6.7812	6.7458	6.4545	6.4311
AGAP1-IT1	-0.43492	-0.6296	-1.1472	0.27843	0.53977	-5.3984	-0.84184	-0.157	-0.29061	-0.048402	-0.79126	-1.6485
AGAP2	0.068111	4.7348	0.94746	0.36608	0.62479	-7.1296	4.7012	4.6529	4.7401	4.7635	4.6843	4.8667
AGAP3	-0.090064	5.9449	-1.4025	0.19152	0.43809	-6.8245	6.0004	5.9901	5.9467	5.8842	5.8311	6.0168
AGAP4	-0.088742	1.2662	-0.42248	0.68176	0.84849	-6.5693	1.284	1.261	1.3792	1.5555	1.4104	0.70697
AGAP5	-0.42857	-2.693	-0.66688	0.52018	0.74838	-5.2829	-2.4963	-2.9178	-1.9135	-2.1831	-2.4965	-4.151
AGAP6	-0.059974	3.863	-0.79973	0.44274	0.68978	-7.0794	3.9491	3.9471	3.7634	3.7782	3.9276	3.8128
AGAP8	0.068666	-1.0493	0.17279	0.86632	0.94183	-5.9541	-1.0224	-1.4439	-0.36757	-1.2803	-1.0893	-1.0921
AGAP9	0.66408	-1.3074	1.8797	0.090045	0.28152	-4.3995	-1.825	-1.4439	-1.3479	-1.3491	-1.1872	-0.69158
AGBL2	0.31802	-0.33683	1.1707	0.26928	0.53095	-5.5312	-0.48304	-0.73019	-0.18235	-0.33157	-0.39073	0.096915
AGBL3	-0.12595	0.47964	-0.65573	0.52702	0.75461	-6.2258	0.48348	0.51218	0.49789	0.6243	0.34624	0.41377
AGBL5	0.13706	5.2888	2.4872	0.032493	0.1493	-5.0686	5.2028	5.2291	5.3249	5.2725	5.346	5.3574
AGBL5-AS1	1.4952	-3.6547	1.4435	0.17995	0.42427	-4.5264	-3.7918	-6.0877	-3.75	-2.6192	-3.8502	-1.8291
AGER	-0.17789	1.8786	-1.3203	0.21662	0.46883	-5.9846	1.8858	2.005	1.9224	2.0247	1.8033	1.6303
AGFG1	-0.13408	6.3181	-2.6076	0.026466	0.13125	-5.0192	6.4308	6.3938	6.3078	6.2121	6.2735	6.2909
AGFG2	-0.22465	4.3933	-2.9962	0.013657	0.084076	-4.0285	4.5041	4.4774	4.4192	4.3669	4.2057	4.3869
AGGF1	0.086635	6.4393	1.657	0.129	0.34918	-6.5463	6.4391	6.4356	6.393	6.3366	6.5692	6.4622
AGK	-0.10154	5.0004	-1.6949	0.12145	0.33656	-6.2739	5.0568	5.1235	4.9608	4.9095	4.9985	4.9531
AGL	-0.0078168	6.2184	-0.14801	0.88532	0.95094	-7.8289	6.2165	6.1575	6.3224	6.2594	6.2116	6.1432
AGMAT	0.22586	3.7641	3.085	0.011751	0.076009	-3.7513	3.6861	3.7276	3.6654	3.6498	3.9246	3.9311
AGO1	0.26293	5.5286	4.2684	0.0017008	0.019813	-2.0872	5.4346	5.3865	5.438	5.5692	5.7017	5.6418
AGO2	-0.26999	7.5453	-6.4519	7.8761e-05	0.0020719	0.95318	7.6734	7.6964	7.5183	7.5591	7.4234	7.4012
AGO3	0.11325	5.3326	1.9761	0.076819	0.25558	-5.9048	5.2637	5.2824	5.3656	5.3368	5.4205	5.3267
AGO4	0.54103	4.568	6.6713	5.9951e-05	0.0017089	1.6378	4.3229	4.2103	4.6911	4.5874	4.8879	4.708
AGPAT1	-0.24597	6.4204	-4.7162	0.00085729	0.012035	-1.4818	6.5282	6.5756	6.378	6.418	6.2611	6.3617
AGPAT2	0.29747	3.6389	2.2587	0.047876	0.19044	-5.113	3.3899	3.6385	3.542	3.573	3.6265	4.0633
AGPAT3	-0.025955	7.2294	-0.41422	0.68759	0.8518	-7.8686	7.2348	7.2939	7.1968	7.155	7.1477	7.3483
AGPAT4	-0.25166	2.0486	-1.8912	0.088359	0.27821	-5.2649	2.2103	2.2477	1.9061	2.078	2.0541	1.7954
AGPAT4-IT1	-0.063851	-0.88221	-0.18124	0.85986	0.93975	-6.0393	-0.94745	-0.47303	-1.1998	-0.68425	-0.64504	-1.3437
AGPAT5	-0.12873	8.821	-3.5098	0.0057705	0.04633	-3.7082	8.8883	8.8793	8.8377	8.8118	8.7641	8.7448
AGPS	0.021104	7.611	0.45133	0.66153	0.83623	-7.8901	7.6464	7.6566	7.5384	7.4922	7.7165	7.6157
AGRN	-1.0306	5.5975	-8.7422	5.9752e-06	0.00033375	3.959	5.9983	6.0706	5.6813	5.7067	4.8029	5.3254
AGTPBP1	-0.12685	5.9705	-2.5483	0.02928	0.13948	-5.0689	6.023	6.0276	5.9659	6.0156	5.909	5.882
AGTRAP	0.051696	6.1856	0.65215	0.52924	0.75653	-7.6154	6.1018	6.2474	6.1467	6.1422	6.1116	6.3637
AHCTF1	-0.036876	7.3835	-0.90952	0.38481	0.63963	-7.5447	7.4787	7.4696	7.2387	7.2387	7.4381	7.4372
AHCY	-0.057073	8.1735	-1.3863	0.19624	0.44387	-7.0842	8.2439	8.2218	8.1451	8.0782	8.1841	8.1678
AHCYL1	-0.053517	7.0071	-1.1346	0.28343	0.5451	-7.2705	7.0293	7.0304	7.0447	6.9963	7.0107	6.9309
AHCYL2	0.18493	3.0748	1.517	0.16072	0.3972	-6.0795	2.92	3.0024	3.1026	3.0264	3.0064	3.3907
AHDC1	-0.31555	2.6485	-2.9797	0.014046	0.085873	-3.6196	2.6986	2.8281	2.7532	2.7711	2.4414	2.3985
AHI1	-0.021718	5.2486	-0.34025	0.74082	0.88034	-7.6361	5.2993	5.2426	5.217	5.2574	5.3094	5.1656
AHNAK	0.31411	9.5938	6.8625	4.7495e-05	0.0014639	1.3343	9.4419	9.3332	9.6847	9.6979	9.7439	9.6611
AHNAK2	-1.8672	4.8168	-27.081	1.4259e-10	5.7302e-07	14.853	5.5414	5.5512	5.2186	5.2646	3.7104	3.615
AHR	0.19022	2.7433	1.5802	0.14563	0.37487	-5.9201	2.6268	2.7671	2.7071	2.5342	2.776	3.0487
AHRR	0.013259	-0.95834	0.041089	0.96805	0.98765	-6.0146	-1.1427	-0.95845	-0.94268	-0.77588	-1.2387	-0.69158
AHSA1	-0.15106	7.5603	-3.6997	0.0042223	0.037493	-3.2792	7.6964	7.6725	7.4758	7.4499	7.5409	7.5266
AHSA2	0.092551	5.953	1.8467	0.095027	0.29077	-6.1962	5.8743	5.8748	5.9878	6.0439	5.9609	5.9761
AHSG	1.2562	-1.4445	2.8401	0.017808	0.10127	-2.9679	-2.4963	-1.3328	-1.9135	-1.152	-0.79126	-0.98109
AHSP	-0.54901	8.1695	-14.112	7.4474e-08	1.7604e-05	8.4083	8.485	8.4928	8.077	8.0878	7.9569	7.9177
AIDA	-0.15783	5.4453	-1.0925	0.30064	0.56174	-7.1156	5.6274	5.5466	5.4015	5.3705	5.6797	5.0462
AIF1L	0.78539	-0.87134	2.3826	0.038815	0.1672	-3.7472	-1.4183	-1.1335	-0.53502	-1.152	-0.61069	-0.37842
AIFM1	0.11068	6.1731	1.8827	0.089597	0.28071	-6.1835	6.1981	6.1682	6.0939	6.0104	6.3532	6.2149
AIFM2	-0.32848	4.7076	-4.7425	0.00082424	0.011672	-1.1831	4.919	4.8788	4.6478	4.6046	4.5166	4.6787
AIFM3	0.35577	-0.62629	1.0794	0.30613	0.56739	-5.5249	-0.53698	-1.4439	-0.36757	-0.47779	-0.48092	-0.45057
AIG1	0.50576	5.4504	8.4375	8.1587e-06	0.00040519	3.6394	5.123	5.0422	5.6843	5.6806	5.6352	5.5372
AIM1	0.44921	9.0084	11.781	4.0195e-07	5.279e-05	6.5303	8.8429	8.8236	8.9324	8.881	9.2674	9.3031
AIM1L	-0.86139	-2.0869	-1.4757	0.17128	0.4134	-4.7411	-2.2068	-0.80233	-2.4699	-1.8486	-2.6278	-2.5661
AIMP1	-0.097013	6.0394	-1.544	0.15411	0.38797	-6.6546	6.1754	6.1196	5.9605	5.9042	6.1251	5.9518
AIMP2	-0.081623	5.7929	-1.4641	0.17436	0.41737	-6.7331	5.8776	5.9686	5.6234	5.6037	5.8023	5.882
AIP	0.011917	5.1863	0.20615	0.84087	0.93068	-7.6634	5.1643	5.1785	5.2309	5.1664	5.1601	5.2175
AJ003147.11	0.70331	-1.4316	1.6214	0.13649	0.36053	-4.6836	-1.3686	-2.6283	-1.1311	-1.2803	-1.0893	-1.0921
AJ003147.9	-0.072707	-1.5032	-0.17241	0.86661	0.94183	-5.8756	-1.6365	-0.87828	-2.0338	-1.3491	-1.2922	-1.8291
AJUBA	0.36755	0.80698	1.6029	0.14052	0.36741	-5.3361	0.63752	0.48212	0.94245	0.64211	0.7547	1.383
AK1	-0.30048	0.010121	-1.2252	0.24901	0.5091	-5.5614	0.21638	0.020787	0.2881	-0.077257	-0.077569	-0.30971
AK2	-0.11444	8.209	-2.8479	0.017571	0.10053	-4.7993	8.3225	8.2785	8.1567	8.1228	8.2003	8.1733
AK3	0.19873	5.5176	3.7802	0.0037029	0.034247	-2.8997	5.4442	5.4255	5.4702	5.5031	5.6504	5.6122
AK3P3	-0.59075	-1.4959	-1.5557	0.15131	0.38378	-4.7496	-1.1427	-1.5642	-1.1998	-1.3491	-1.8908	-1.8291
AK4	-0.19316	6.5128	-3.7398	0.0039547	0.035719	-3.0746	6.4541	6.3642	6.9296	6.8829	6.2185	6.2273
AK4P1	-1.0614	-1.6827	-2.0845	0.064152	0.22786	-3.9994	-1.4699	-0.95845	-0.88497	-1.9517	-2.2652	-2.5661
AK6	0.037069	5.2649	0.59682	0.5641	0.77859	-7.5194	5.3396	5.2791	5.1339	5.1634	5.4033	5.2704
AK7	-0.74959	0.50013	-3.8074	0.003543	0.033364	-1.7347	0.93365	0.80708	0.58216	0.39142	0.13979	0.14667
AK8	1.1903	-2.7357	2.2068	0.052258	0.20142	-3.7481	-3.5508	-3.2804	-2.857	-2.3143	-2.3762	-2.0355
AK9	-0.057037	2.5983	-0.37926	0.71255	0.86531	-6.9862	2.6751	2.5525	2.5949	2.7872	2.7331	2.247
AKAP1	-0.18141	6.4171	-3.723	0.0040643	0.036431	-3.1214	6.5564	6.5563	6.3527	6.2805	6.3575	6.3994
AKAP10	-0.096183	5.0451	-1.1976	0.25911	0.52013	-6.9202	5.1181	5.0383	5.0587	5.1377	5.0809	4.8367
AKAP11	-0.032685	6.1104	-0.64986	0.53066	0.75733	-7.6073	6.1704	6.1384	6.0571	6.0622	6.1553	6.079
AKAP12	0.21155	1.2679	1.3295	0.21368	0.46522	-5.8114	1.0388	1.2251	1.2944	1.3541	1.2514	1.4439
AKAP13	0.12551	5.5154	2.1856	0.054155	0.20613	-5.6101	5.5043	5.4797	5.4073	5.481	5.6552	5.5649
AKAP2	0.72961	0.59925	3.0242	0.013024	0.081365	-3.0015	-0.071317	0.25211	0.80893	1.2063	0.86866	0.53081
AKAP3	-0.093623	-0.71868	-0.33311	0.74604	0.88358	-6.0667	-0.68137	-0.47303	-1.0655	-0.68425	-0.7163	-0.69158
AKAP4	-1.4192	-2.1338	-2.3079	0.044049	0.18049	-3.6261	-1.6966	-1.5642	-1.8025	-1.0919	-2.4965	-4.151
AKAP5	0.75797	0.59235	3.8163	0.0034925	0.033131	-1.7855	0.29567	0.59876	0.31297	0.16375	1.2607	0.92224
AKAP6	-0.12107	-0.17971	-0.45572	0.65848	0.83469	-6.1813	0.16663	-0.35982	-0.53502	-0.13676	-0.14972	-0.06355
AKAP8	-0.0073596	6.2684	-0.13898	0.89227	0.95358	-7.8436	6.2712	6.3	6.2328	6.2339	6.228	6.3445
AKAP8L	-0.16335	7.2063	-3.4782	0.0060805	0.047894	-3.6156	7.2612	7.2419	7.2866	7.2575	7.0493	7.1415
AKAP9	0.081161	7.0518	1.0282	0.32846	0.58997	-7.3848	7.0425	6.9004	7.0982	7.182	7.1686	6.9193
AKIP1	0.061757	4.1051	0.83308	0.42455	0.67425	-7.109	4.1124	4.1181	3.9494	4.0837	4.1592	4.208
AKIRIN1	0.081402	6.074	1.6117	0.13858	0.36407	-6.5678	6.0871	6.1086	5.9878	5.9069	6.181	6.1728
AKIRIN2	0.1364	4.8794	1.6736	0.12564	0.34376	-6.2746	4.7449	4.8874	4.9686	4.8513	5.0047	4.8196
AKNA	0.11784	0.40978	0.47222	0.64706	0.82979	-6.3242	0.44226	0.14108	0.12911	0.7446	0.39777	0.60387
AKR1A1	0.13237	6.1988	2.5563	0.028883	0.13848	-5.0922	6.1527	6.1593	6.1302	6.1574	6.246	6.3472
AKR1B1	0.54268	4.2802	6.8028	5.1054e-05	0.0015316	1.8504	4.0463	4.0037	4.2524	4.1783	4.5049	4.6955
AKR1C1	0.13654	3.0879	1.5069	0.16323	0.40151	-6.1009	3.083	2.9864	3.0738	3.0093	3.1833	3.1918
AKR1C2	0.47065	-1.338	1.2897	0.22662	0.48143	-5.1057	-1.6365	-1.8398	-0.94268	-1.2803	-1.3477	-0.98109
AKR1C3	0.2675	1.2306	1.4277	0.18433	0.42961	-5.6693	1.1019	1.0312	1.1908	1.5077	1.4678	1.0842
AKR1E2	-0.18859	2.8238	-1.5684	0.14835	0.37899	-5.9161	2.9546	2.7356	3.0144	2.9426	2.7695	2.5261
AKR7A2	-0.093615	5.2775	-1.3681	0.2017	0.45109	-6.7628	5.2726	5.3855	5.2775	5.2428	5.1651	5.3213
AKR7A3	-0.88728	-0.67866	-2.8573	0.017293	0.099485	-3.0353	-0.26254	-0.30638	-0.40765	-0.92525	-1.2922	-0.87799
AKR7L	-0.86559	-2.7152	-1.6021	0.1407	0.36767	-4.4781	-2.2068	-2.6283	-2.3095	-2.6192	-3.1132	-3.414
AKT1	0.10595	6.9826	1.5413	0.15476	0.38909	-6.7651	6.9123	6.951	6.9734	6.9557	6.9313	7.1719
AKT1S1	-0.096244	5.5645	-1.6279	0.13508	0.35816	-6.463	5.6069	5.6295	5.537	5.5434	5.466	5.6044
AKT2	-0.18223	7.65	-2.8509	0.017484	0.10022	-4.7421	7.7006	7.7969	7.6114	7.6437	7.4725	7.6749
AKT3	0.33173	-2.0338	0.63466	0.54012	0.76239	-5.4362	-2.8589	-2.3873	-1.0028	-1.4972	-2.6278	-1.8291
AKTIP	0.25687	1.285	1.543	0.15435	0.38839	-5.5454	1.0109	1.3469	1.2818	1.3541	1.4187	1.2974
AL022341.3	0.0339	-0.8895	0.10001	0.92235	0.96787	-6.0294	-0.65131	-1.4439	-0.7245	-0.82397	-0.91156	-0.78178
AL133243.1	0.027337	0.70953	0.1277	0.90096	0.95834	-6.485	0.60052	0.62651	1.0792	0.87082	0.7937	0.28639
AL133243.2	-0.01232	1.5731	-0.063565	0.95059	0.97904	-6.7445	1.5003	1.5047	1.7509	1.9336	1.6907	1.0584
AL133243.3	0.072937	-2.5078	0.14136	0.89044	0.95263	-5.542	-2.6074	-2.9178	-1.9135	-2.1831	-2.4965	-2.9286
AL133243.4	-0.19414	0.13185	-0.68412	0.50969	0.74181	-6.0734	0.23259	0.14108	0.23702	0.51255	0.27454	-0.60669
AL133245.2	-0.21755	-2.2213	-0.41055	0.6902	0.85278	-5.5361	-2.6074	-1.8398	-1.513	-2.0628	-2.3762	-2.9286
AL136419.6	-0.45845	-1.9911	-1.0533	0.31737	0.57897	-5.2195	-1.6365	-1.6954	-2.3095	-1.8486	-1.8908	-2.5661
AL162151.3	0.2154	0.37986	0.88107	0.39928	0.65217	-6.0306	0.024898	0.45142	0.31297	0.53179	0.21832	0.73976
AL163953.3	1.0258	-1.5458	2.6349	0.02526	0.12727	-3.2428	-2.3932	-2.0003	-1.272	-1.2803	-1.3477	-0.98109
AL450992.2	0.15711	-2.4227	0.26181	0.79887	0.90992	-5.5622	-2.8589	-2.0003	-2.3095	-2.0628	-1.8908	-3.414
ALAD	-0.20991	6.744	-3.9402	0.0028599	0.028876	-2.7878	6.8443	6.8779	6.706	6.7169	6.5913	6.7278
ALAS1	0.32849	5.4136	5.8246	0.00017791	0.0037641	0.32478	5.2479	5.2846	5.421	5.3605	5.6168	5.5512
ALAS2	-1.1638	7.4441	-26.2	1.9664e-10	5.7302e-07	14.695	7.9897	8.0071	7.5051	7.4845	6.8012	6.8771
ALB	1.7707	-3.0928	2.894	0.016248	0.095409	-2.8698	-4.4439	-2.9178	-3.75	-3.2472	-2.1621	-2.0355
ALCAM	1.0241	1.1339	6.4039	8.368e-05	0.0021256	1.9012	0.56255	0.54162	1.3191	1.2418	1.5983	1.5401
ALDH16A1	-0.10138	6.3899	-1.0547	0.31677	0.5785	-7.2905	6.4182	6.4918	6.3846	6.2861	6.1953	6.5635
ALDH18A1	-0.24338	7.472	-5.2778	0.00037812	0.0067026	-0.72367	7.6546	7.6182	7.431	7.3404	7.4034	7.3841
ALDH1A1	3.1056	-1.559	5.9581	0.00014893	0.003276	0.96166	-3.7918	-1.6954	-1.9135	-1.9517	0.11947	-0.12127
ALDH1A2	0.29834	1.3497	1.9398	0.081565	0.2652	-4.98	1.1876	1.0721	1.4026	1.5648	1.4678	1.4036
ALDH1B1	-0.18867	6.4138	-3.979	0.0026874	0.02759	-2.6925	6.5916	6.5734	6.2405	6.278	6.3718	6.4274
ALDH2	0.67954	-0.99417	2.0727	0.065427	0.2308	-4.1843	-1.2289	-1.5642	-1.1998	-0.72933	-0.7163	-0.52652
ALDH3A2	0.068475	4.3513	0.90351	0.38783	0.64216	-7.0995	4.3454	4.3417	4.3682	4.2025	4.3824	4.4674
ALDH3B1	-0.32121	5.8041	-3.9512	0.0028102	0.028487	-2.6367	5.8407	5.8977	6.007	5.9302	5.4319	5.7168
ALDH4A1	0.21888	5.4752	3.6757	0.0043914	0.038456	-3.0746	5.4112	5.3885	5.3891	5.3917	5.5675	5.7033
ALDH5A1	0.2493	6.4	5.2547	0.0003907	0.0068382	-0.64683	6.2992	6.2673	6.3572	6.4021	6.5219	6.5526
ALDH6A1	0.21179	5.9843	4.1145	0.0021662	0.023563	-2.3987	5.7967	5.8741	6.0844	6.0729	6.0499	6.0277
ALDH7A1	0.6635	-2.3926	0.91115	0.38399	0.63932	-5.1669	-3.5508	-2.9178	-1.272	-1.9517	-3.3196	-1.3437
ALDH8A1	-0.17379	-2.4036	-0.28359	0.7826	0.90037	-5.573	-1.8937	-2.9178	-2.857	-1.6622	-2.1621	-2.9286
ALDH9A1	0.013156	4.892	0.2121	0.83636	0.92886	-7.6094	4.8438	4.9477	4.8861	4.8826	4.9014	4.8906
ALDOA	-0.34824	9.9551	-7.0596	3.7528e-05	0.0012439	1.5693	9.9706	10.001	10.267	10.205	9.5691	9.7184
ALDOC	-0.59401	6.1563	-9.4935	2.8721e-06	0.00019661	4.7022	6.068	6.1293	6.8521	6.8503	5.4334	5.6044
ALG1	-0.12326	5.425	-2.1605	0.056484	0.21106	-5.6371	5.5134	5.5682	5.3626	5.2746	5.4028	5.4283
ALG10	0.018931	4.4096	0.22777	0.82448	0.92286	-7.5056	4.3398	4.4289	4.4767	4.3682	4.3192	4.5249
ALG10B	-0.068325	4.1381	-0.944	0.36776	0.62606	-6.9983	4.1481	4.1471	4.2443	4.1475	4.0982	4.0437
ALG11	-0.01556	3.9192	-0.16913	0.86912	0.94316	-7.4138	4.0405	3.8881	3.8509	3.8699	4.0494	3.8167
ALG12	-0.052783	3.8531	-0.53126	0.60701	0.8064	-7.2551	3.8553	3.8621	3.8887	3.8022	3.6967	4.0139
ALG13	-0.035397	5.0897	-0.54116	0.60043	0.80187	-7.5055	5.1022	5.0664	5.1633	5.1408	5.1108	4.9549
ALG14	-0.29355	3.5179	-3.43	0.0065873	0.050648	-3.0938	3.7296	3.7115	3.427	3.4393	3.4887	3.3111
ALG1L	-0.19237	-2.9991	-0.27203	0.79122	0.90534	-5.4313	-2.8589	-2.9178	-3.3875	-2.1831	-2.4965	-4.151
ALG1L13P	-1.8447	-2.5425	-2.6329	0.025346	0.12756	-3.1977	-2.0418	-1.6954	-2.4699	-2.3143	-4.6982	-2.0355
ALG1L2	0.025663	-0.5077	0.079716	0.93806	0.97337	-6.1424	-0.65131	-0.41531	-0.018234	-0.72933	-0.45023	-0.78178
ALG2	0.024724	4.9108	0.39203	0.70339	0.86057	-7.5578	4.9102	4.9186	4.8462	4.8816	4.8932	5.0147
ALG3	-0.14986	5.9181	-1.9009	0.08696	0.27611	-6.1198	5.9837	6.0981	5.7721	5.8405	5.7798	6.0343
ALG5	0.10898	5.0689	1.5266	0.15832	0.39409	-6.5231	5.0642	5.0435	5.066	4.952	5.2299	5.0576
ALG6	0.062785	4.4258	0.98379	0.34878	0.60889	-7.0448	4.4401	4.462	4.3091	4.3039	4.4892	4.5506
ALG8	0.025683	5.9446	0.5096	0.62156	0.81482	-7.6728	5.948	5.9947	5.8697	5.8781	6.0145	5.9623
ALG9	0.048072	2.7777	0.41428	0.68755	0.8518	-7.0376	2.856	2.6838	2.7891	2.7384	2.9297	2.6692
ALG9-IT1	-0.47304	-3.0623	-0.67323	0.5163	0.74622	-5.2128	-3.5508	-2.3873	-2.1651	-2.7997	-3.3196	-4.151
ALKBH1	-0.070983	4.1819	-1.011	0.33621	0.597	-6.9587	4.2169	4.3078	4.1212	4.0772	4.1691	4.1992
ALKBH2	-0.13794	4.8989	-2.112	0.061271	0.22161	-5.624	5.0023	5.037	4.7996	4.7605	4.825	4.9688
ALKBH3	-0.065413	5.0672	-1.1265	0.28667	0.54805	-7.0144	5.1203	5.1393	5.0476	4.9812	5.077	5.038
ALKBH4	-0.18267	4.1207	-2.0105	0.072569	0.24611	-5.612	4.2036	4.1872	4.1159	4.0967	3.9129	4.208
ALKBH5	-0.15557	7.2956	-3.5614	0.0052984	0.043827	-3.4778	7.2833	7.3135	7.4696	7.4221	7.1324	7.1526
ALKBH6	0.15798	1.7305	0.8543	0.41325	0.66511	-6.407	1.4527	1.4436	2.1739	1.9118	1.4434	1.9575
ALKBH7	-0.0087458	4.6168	-0.074491	0.94211	0.97513	-7.5587	4.3967	4.668	4.7053	4.8542	4.3706	4.7059
ALKBH8	-0.11377	4.7663	-1.4521	0.17758	0.4214	-6.5652	4.8346	4.9284	4.7321	4.6449	4.8328	4.6249
ALMS1	-0.047486	6.377	-0.95034	0.36469	0.62354	-7.3938	6.4259	6.4267	6.3139	6.3218	6.3387	6.4349
ALMS1-IT1	0.019275	-0.0059969	0.083189	0.93537	0.97313	-6.3042	0.079691	-0.25485	0.04252	0.11357	-0.0088559	-0.0080546
ALOX12	-0.48132	2.1975	-3.6754	0.0043935	0.038456	-2.3297	2.3468	2.5159	2.1603	2.3514	1.9543	1.8565
ALOX12-AS1	-0.29025	1.4493	-1.2502	0.24012	0.4984	-5.962	1.746	1.5489	1.7326	1.0943	1.5686	1.0055
ALOX12B	0.8072	-1.7991	1.5528	0.152	0.38465	-4.6839	-2.6074	-1.8398	-1.1311	-1.7524	-1.1872	-2.2765
ALOX5	0.045923	5.9128	0.73296	0.48067	0.71877	-7.5074	5.7685	5.8734	6.0255	6.0659	5.8031	5.9404
ALPK1	1.3036	-0.7564	4.0086	0.0025632	0.026717	-1.2646	-1.5233	-1.4439	-0.58011	-0.82397	-0.36187	0.19476
ALPL	-0.62045	0.37043	-1.9612	0.078736	0.25919	-4.6613	0.34123	1.1507	0.66178	0.25917	0.11947	-0.30971
ALS2	0.21005	8.2932	4.1308	0.0021113	0.023101	-2.6179	8.2356	8.2044	8.2578	8.2145	8.4958	8.3512
ALS2CL	0.59206	-1.9604	1.2806	0.22969	0.48522	-4.9238	-2.7277	-2.3873	-1.1311	-1.3491	-1.8908	-2.2765
ALS2CR12	0.065261	-1.1634	0.16809	0.86992	0.94352	-5.8882	-1.4183	-1.2298	-0.53502	-0.92525	-1.0428	-1.8291
ALYREF	-0.071528	7.3053	-0.9108	0.38416	0.63949	-7.5333	7.3541	7.4035	7.2714	7.1584	7.1833	7.4608
AMACR	0.39152	-1.5339	0.82561	0.42858	0.67778	-5.4823	-2.3932	-1.1335	-1.3479	-1.0342	-1.4655	-1.8291
AMBRA1	-0.15878	5.9333	-2.2259	0.050603	0.19775	-5.6004	5.9774	6.0296	5.9417	5.923	5.7454	5.983
AMD1	-0.04725	8.3818	-1.2543	0.23869	0.49687	-7.2693	8.4875	8.4868	8.2119	8.2281	8.4524	8.4243
AMD1P3	0.52952	-2.9633	0.84417	0.41862	0.66902	-5.1037	-3.5508	-3.7658	-1.8025	-2.3143	-2.9326	-3.414
AMDHD2	-0.023374	4.5431	-0.25843	0.8014	0.91087	-7.5356	4.5565	4.5961	4.4475	4.4739	4.4358	4.7488
AMER1	-0.059791	4.3047	-0.88352	0.39802	0.65075	-7.1209	4.4591	4.389	4.0946	4.116	4.3446	4.4252
AMFR	-0.14583	7.4299	-3.0278	0.012945	0.081043	-4.4129	7.4546	7.482	7.5137	7.4737	7.2748	7.3805
AMH	-0.064419	1.4949	-0.24652	0.81034	0.91553	-6.7083	1.1876	1.5917	1.5667	1.7569	0.95146	1.9151
AMHR2	-0.27367	3.0562	-2.27	0.046969	0.18824	-4.9392	3.1571	3.2183	3.0847	2.939	2.7824	3.1558
AMIGO1	0.50585	-1.4271	1.0539	0.31711	0.5789	-5.351	-1.1015	-2.6283	-1.272	-1.5773	-1.2922	-0.69158
AMIGO2	0.58986	4.2191	7.5289	2.181e-05	0.00082275	2.7741	3.8979	3.9249	4.2149	4.2293	4.4316	4.6161
AMMECR1	-0.18824	8.5816	-5.0222	0.00054572	0.0086544	-1.2082	8.6976	8.6755	8.5445	8.5723	8.4968	8.5027
AMMECR1-IT1	-0.3934	-0.38999	-1.1593	0.27368	0.53547	-5.4724	-0.26254	-0.59588	0.38512	-0.33157	-0.7533	-0.78178
AMMECR1L	0.043687	4.7748	0.73889	0.47722	0.71636	-7.3227	4.7673	4.7757	4.7549	4.7191	4.81	4.8215
AMN	0.62236	-0.2198	2.0866	0.06393	0.22752	-4.3366	-0.77549	-0.47303	0.15685	-0.33157	-0.22567	0.33011
AMN1	-0.015225	2.1561	-0.10357	0.91959	0.96664	-6.9396	2.2143	2.005	2.0536	2.394	2.1169	2.1528
AMPD2	-0.403	6.2765	-6.4172	8.2279e-05	0.0021081	1.0394	6.4439	6.4704	6.2891	6.3149	5.9727	6.1683
AMPD3	-0.48218	3.666	-6.0045	0.00014008	0.0031457	0.92047	3.8475	3.9443	3.7176	3.6911	3.4051	3.3907
AMY2B	-0.62107	-0.81485	-1.6298	0.13469	0.35743	-4.7964	-0.94745	-0.157	-0.32857	-0.72933	-1.2387	-1.488
AMZ2	0.0032499	4.6463	0.049671	0.96138	0.98408	-7.5874	4.674	4.6325	4.5879	4.6316	4.6233	4.7286
AMZ2P1	-0.18922	1.8132	-1.4933	0.16671	0.40658	-5.7636	1.9162	1.9179	1.8306	1.7487	1.718	1.7478
ANAPC1	-0.025883	7.3677	-0.58057	0.57458	0.78479	-7.795	7.4422	7.4037	7.3154	7.25	7.4119	7.3828
ANAPC10	-0.061359	3.9995	-0.80063	0.44224	0.68937	-7.0989	4.0451	4.0142	3.9534	4.0657	4.0016	3.9169
ANAPC11	-0.26455	5.3408	-4.5831	0.0010478	0.014128	-1.5438	5.4585	5.5098	5.3157	5.3085	5.1793	5.2732
ANAPC13	-0.070591	5.2527	-1.2369	0.24483	0.50371	-6.9311	5.3274	5.4126	5.0851	5.1003	5.2777	5.3132
ANAPC15	-0.15684	4.7665	-2.6031	0.026667	0.13188	-4.7836	4.857	4.9172	4.6828	4.698	4.7277	4.7163
ANAPC16	0.0032787	6.0884	0.064814	0.94962	0.97856	-7.8214	6.0575	6.0509	6.1796	6.1391	6.0857	6.0177
ANAPC1P1	0.71682	-0.93883	2.2391	0.049485	0.19458	-3.982	-1.2739	-1.1335	-1.0028	-1.4212	-0.68023	-0.12127
ANAPC2	-0.12016	5.557	-1.4678	0.17336	0.41638	-6.6859	5.6066	5.6965	5.4709	5.4586	5.4122	5.6971
ANAPC4	0.061526	5.7556	1.2135	0.25326	0.51418	-7.0281	5.7348	5.7256	5.7676	5.7194	5.7903	5.7959
ANAPC5	-0.047057	7.8282	-1.1464	0.27873	0.53992	-7.3419	7.8847	7.9064	7.7419	7.7351	7.8235	7.8775
ANAPC7	-0.0031804	6.2329	-0.066683	0.94817	0.97774	-7.853	6.3128	6.2789	6.0849	6.1304	6.2941	6.2964
ANGEL1	-0.22754	4.5228	-2.9285	0.015321	0.09161	-4.1809	4.6821	4.6427	4.4019	4.4689	4.3631	4.578
ANGEL2	0.060107	5.4236	1.112	0.29254	0.55395	-7.0876	5.3911	5.3855	5.4646	5.4081	5.4579	5.4346
ANGPT1	4.2487	-2.0107	5.4447	0.00029903	0.0056223	-0.24754	-3.0033	-6.0877	-1.3479	-1.6622	0.21832	-0.18139
ANGPTL4	-0.74943	1.0508	-4.0115	0.0025517	0.026613	-1.4287	1.0202	0.92349	1.9061	1.9764	0.2373	0.2413
ANGPTL6	-0.93621	1.8996	-6.849	4.8271e-05	0.0014833	2.3805	2.2386	2.4001	2.0313	2.0449	1.3851	1.2974
ANK1	-0.21374	10.273	-6.2164	0.00010629	0.0025468	0.41617	10.35	10.357	10.319	10.327	10.115	10.169
ANK2	0.88936	-2.1025	1.6163	0.13758	0.36223	-4.5721	-3.1638	-1.8398	-1.513	-2.4587	-1.8106	-1.8291
ANK3	1.0516	-2.3233	2.0176	0.071715	0.24454	-4.045	-3.0033	-2.3873	-1.9135	-3.0062	-1.5938	-2.0355
ANKAR	0.33073	2.5119	2.9758	0.01414	0.086239	-3.604	2.3763	2.2477	2.615	2.5484	2.7027	2.5814
ANKDD1B	0.30239	-1.8965	0.64985	0.53066	0.75733	-5.5224	-2.6074	-1.6954	-1.6032	-1.6622	-2.1621	-1.6485
ANKEF1	-0.16119	3.6626	-1.7663	0.10827	0.31449	-5.8748	3.7109	3.7687	3.7106	3.5799	3.5045	3.7007
ANKFY1	-0.12726	6.1092	-2.5779	0.027837	0.13585	-5.0437	6.2137	6.2003	6.006	6.0725	6.0775	6.0854
ANKH	-0.22556	2.806	-2.1663	0.055934	0.20998	-5.0206	2.8845	2.798	2.9484	2.8914	2.578	2.7357
ANKHD1	0.22915	1.8751	1.4964	0.16591	0.40584	-5.7531	1.8229	1.5196	2.0683	2.0382	2.0379	1.7639
ANKHD1-EIF4EBP3	-0.44532	-0.238	-1.5332	0.15671	0.39178	-5.1126	0.043394	-0.021648	-0.40765	0.061571	-0.22567	-0.87799
ANKIB1	0.024532	6.5599	0.4726	0.6468	0.82979	-7.7662	6.571	6.5309	6.5842	6.5331	6.621	6.5193
ANKLE1	-0.16154	6.5099	-2.406	0.037303	0.16355	-5.3854	6.6401	6.656	6.3787	6.3767	6.3884	6.6197
ANKLE2	0.012359	6.3317	0.24351	0.81261	0.917	-7.8274	6.3331	6.3091	6.3724	6.296	6.3121	6.3676
ANKMY1	-0.13787	3.6475	-1.419	0.18677	0.43263	-6.3564	3.6654	3.8679	3.5127	3.6695	3.6319	3.5378
ANKMY2	0.066568	5.6255	1.2009	0.25788	0.5188	-7.0182	5.5846	5.5593	5.7032	5.6402	5.6701	5.5955
ANKRA2	0.016041	3.5802	0.17699	0.86311	0.9409	-7.3068	3.4961	3.4802	3.6917	3.7291	3.4342	3.6499
ANKRD10	0.20337	5.9191	3.9677	0.0027368	0.027943	-2.6381	5.7974	5.7861	5.9723	5.9527	5.9666	6.0392
ANKRD10-IT1	-0.032285	2.6478	-0.25813	0.80162	0.911	-7.0325	2.6928	2.4161	2.9041	2.7384	2.563	2.5724
ANKRD11	0.010736	6.5679	0.21294	0.83572	0.9286	-7.8619	6.5829	6.5138	6.5826	6.6124	6.595	6.5205
ANKRD12	-0.08176	6.242	-1.1532	0.27604	0.53759	-7.1622	6.3378	6.2446	6.2213	6.2561	6.3085	6.0838
ANKRD13A	0.18103	6.0958	3.8235	0.0034518	0.032903	-2.9057	5.9924	5.9987	6.1219	6.1082	6.1727	6.181
ANKRD13B	-0.024315	3.2551	-0.2611	0.7994	0.91004	-7.2139	3.2296	3.2319	3.2676	3.3282	3.1461	3.3274
ANKRD13C	-0.045529	5.2303	-0.73108	0.48177	0.7198	-7.4126	5.2701	5.278	5.2584	5.1203	5.2287	5.2262
ANKRD13D	-0.05056	4.106	-0.53462	0.60478	0.80471	-7.3027	4.0611	4.0784	4.1404	4.2308	3.9143	4.2109
ANKRD16	0.014566	3.115	0.12443	0.90348	0.9593	-7.2242	3.0986	3.1578	2.9642	3.0797	3.0147	3.3752
ANKRD17	3.3535e-05	7.9191	0.00081905	0.99936	0.99968	-8.028	7.9671	7.9403	7.846	7.8572	7.9786	7.9255
ANKRD18A	-0.053805	1.2106	-0.28113	0.78443	0.90159	-6.6527	1.2995	1.3961	1.2435	0.95872	1.4434	0.92224
ANKRD18B	0.10411	4.218	0.7709	0.45887	0.70178	-7.169	4.2015	4.1471	4.3091	4.2469	4.4793	3.924
ANKRD18DP	0.72119	-1.5064	1.3476	0.20798	0.45825	-4.9999	-1.3205	-2.6283	-1.0028	-1.5773	-0.68023	-1.8291
ANKRD2	-0.56693	-1.9941	-1.2254	0.24895	0.50904	-4.9794	-1.9658	-2.1808	-1.272	-1.4972	-2.7722	-2.2765
ANKRD20A11P	0.19533	0.26118	0.67973	0.51234	0.74381	-6.1015	0.24862	-0.25485	0.56155	0.7446	0.5113	-0.24412
ANKRD20A14P	0.70444	0.80385	3.5088	0.0057796	0.04633	-2.2757	0.26447	0.45142	0.86046	1.0549	0.91655	1.2753
ANKRD20A4	0.21688	-1.2233	0.46906	0.64924	0.83119	-5.7885	-1.6966	-0.95845	-0.62666	-1.152	-0.87034	-2.0355
ANKRD20A5P	0.36635	-0.049705	1.4075	0.19007	0.43634	-5.3284	-0.33236	-0.20509	0.33743	-0.13676	0.15983	-0.12127
ANKRD20A7P	0.22742	1.2444	1.2023	0.25739	0.51824	-5.9496	0.95334	1.3469	1.2564	1.4071	1.4187	1.0842
ANKRD20A8P	-0.57788	-0.95786	-1.6793	0.1245	0.342	-4.6861	-0.91138	-1.0433	-0.44887	-0.51679	-1.7347	-1.0921
ANKRD23	-0.43327	-1.572	-0.99034	0.34573	0.60583	-5.3259	-1.2289	-1.8398	-1.0028	-1.4212	-1.6625	-2.2765
ANKRD24	-0.48512	-0.021057	-1.9858	0.075599	0.25257	-4.4927	0.079691	-0.065369	0.31297	0.49306	-0.42017	-0.52652
ANKRD26	0.27471	5.4421	3.7517	0.0038787	0.035249	-2.9344	5.3573	5.2802	5.4577	5.4022	5.6849	5.4704
ANKRD26P3	0.25203	-1.5846	0.54423	0.5984	0.80082	-5.7217	-1.3686	-2.1808	-2.1651	-1.3491	-1.6625	-0.78178
ANKRD26P4	-0.0579	-3.6042	-0.071393	0.94451	0.97623	-5.2901	-3.5508	-4.5028	-3.3875	-2.1831	-3.8502	-4.151
ANKRD27	0.14009	8.0598	3.0554	0.012354	0.078594	-4.4297	8.0223	8.0202	8.0006	7.9798	8.1117	8.2239
ANKRD28	0.19308	6.2598	3.5288	0.0055921	0.045358	-3.4188	6.112	6.0553	6.3908	6.455	6.3199	6.2258
ANKRD30BL	0.2269	4.2574	1.9156	0.084893	0.27227	-5.7855	4.0451	4.2862	4.2715	4.3344	4.4961	4.1111
ANKRD31	-0.42128	-1.5472	-0.90687	0.38614	0.64069	-5.4078	-1.3205	-2.0003	-1.4281	-0.92525	-2.2652	-1.3437
ANKRD33B	0.72657	4.4587	9.9341	1.91e-06	0.00014788	5.3192	4.1319	4.0859	4.4545	4.3615	4.7933	4.9249
ANKRD34A	-0.38531	-0.12189	-1.285	0.2282	0.4835	-5.4604	0.079691	0.10209	-0.4913	0.30461	-0.1999	-0.52652
ANKRD36	-0.042648	5.7578	-0.72876	0.48313	0.72097	-7.4844	5.7259	5.6767	5.8884	5.9532	5.7059	5.5966
ANKRD36B	0.16475	4.5186	2.0319	0.070026	0.24099	-5.6433	4.4101	4.2034	4.7628	4.7139	4.4662	4.5552
ANKRD36BP2	0.16617	6.1123	3.1996	0.009685	0.066725	-3.9677	5.959	5.9901	6.2168	6.2467	6.1733	6.0878
ANKRD36C	0.067346	5.7816	0.91071	0.38421	0.63951	-7.33	5.6995	5.57	5.9806	6.0535	5.7907	5.5955
ANKRD37	-0.37029	2.522	-2.7159	0.022005	0.11638	-3.972	2.4016	2.4161	2.9759	3.2374	2.0106	2.0906
ANKRD39	-0.088139	1.0256	-0.46216	0.65401	0.83272	-6.533	1.1876	1.1697	0.68101	1.0682	1.2135	0.83388
ANKRD40	0.041346	4.8671	0.57848	0.57593	0.78548	-7.4582	4.9634	4.8078	4.7193	4.8027	4.9147	4.9945
ANKRD42	0.25315	2.888	2.1468	0.057794	0.21388	-5.0934	2.7808	2.7918	2.7713	2.9956	3.1207	2.8677
ANKRD44	0.71477	-4.0958	0.5668	0.58354	0.79126	-5.1431	-4.9293	-4.5028	-4.9724	-3.2472	-5.4351	-1.488
ANKRD46	0.19241	3.6403	2.3166	0.043409	0.17865	-5.0328	3.5793	3.7212	3.4856	3.3954	3.8057	3.8546
ANKRD49	-0.019678	4.3928	-0.26562	0.79601	0.90836	-7.4943	4.3676	4.4563	4.3107	4.4425	4.3598	4.4201
ANKRD50	0.17483	5.3729	2.3336	0.042176	0.17511	-5.3442	5.3241	5.3349	5.3149	5.3126	5.599	5.3522
ANKRD52	-0.089556	5.0749	-1.1176	0.29027	0.55161	-7.0326	5.1658	5.1691	4.9199	4.9724	4.976	5.2463
ANKRD53	0.63596	-2.5883	0.97426	0.35326	0.61315	-5.1637	-3.7918	-1.6954	-2.6505	-2.6192	-2.4965	-2.2765
ANKRD54	-0.011169	4.4024	-0.16689	0.87084	0.94397	-7.5144	4.3603	4.4191	4.4461	4.4259	4.3457	4.4176
ANKRD6	1.7413	-3.4143	1.9067	0.086131	0.27456	-4.0672	-4.4439	-4.5028	-2.1651	-3.2472	-1.9757	-4.151
ANKRD63	0.62734	-2.6109	1.0023	0.3402	0.60107	-5.0757	-3.7918	-2.6283	-1.9135	-2.1831	-3.1132	-2.0355
ANKRD9	-0.4449	5.0641	-4.5507	0.0011008	0.014641	-1.5255	5.0828	5.2593	5.3126	5.2282	4.5932	4.9088
ANKS1A	0.16902	5.6479	2.8196	0.01844	0.10362	-4.5671	5.534	5.6372	5.6135	5.5906	5.7038	5.8085
ANKS3	-0.027048	4.026	-0.34987	0.73381	0.87577	-7.3848	4.0371	4.048	4.0172	3.9755	3.9579	4.1205
ANKS6	0.30186	0.3628	1.0956	0.29935	0.56091	-5.8674	0.1834	0.68045	0.47603	-0.33157	0.7547	0.41377
ANKZF1	-0.25918	5.91	-5.1759	0.0004372	0.0074319	-0.68586	5.9154	5.9529	6.1232	6.1221	5.6679	5.6782
ANLN	-0.098275	6.4322	-2.1027	0.062235	0.2238	-5.8679	6.5353	6.4895	6.3519	6.38	6.4121	6.4242
ANO10	-0.057803	4.7068	-0.90789	0.38563	0.64036	-7.1642	4.7722	4.7042	4.6708	4.6959	4.6607	4.7367
ANO5	-0.30075	4.8535	-5.0629	0.00051446	0.0083453	-0.71484	5.0867	5.0344	4.7158	4.7564	4.769	4.7589
ANO6	0.28974	5.533	5.5516	0.00025785	0.0049882	-0.088391	5.3965	5.3824	5.5311	5.5183	5.6636	5.7065
ANO7	-0.36364	1.5816	-2.4873	0.032487	0.1493	-4.1606	1.6222	1.726	1.778	1.707	1.2326	1.4239
ANO7P1	0.01631	-0.96063	0.051225	0.96017	0.98386	-6.0668	-1.1015	-0.53315	-1.3479	-1.0919	-0.99772	-0.69158
ANO8	0.089786	1.6087	0.59777	0.56349	0.77803	-6.5738	1.3818	1.4745	1.8133	1.8821	1.4187	1.6819
ANO9	-0.697	-0.55218	-1.7774	0.10635	0.31136	-4.65	-0.45681	-0.66147	0.26279	-0.40283	-1.5282	-0.52652
ANOS2P	0.76841	-1.5962	1.9204	0.084213	0.27073	-4.299	-1.8937	-1.6954	-1.6994	-1.8486	-0.79126	-1.6485
ANP32A	0.031124	7.9839	0.54133	0.60032	0.80184	-7.8757	8.0364	7.9922	7.938	7.861	8.1233	7.9524
ANP32AP1	-0.14593	-1.934	-0.29752	0.77225	0.89606	-5.6781	-1.5233	-2.3873	-1.8025	-1.6622	-1.6625	-2.5661
ANP32B	0.18094	6.2226	1.1548	0.27545	0.53697	-7.1612	6.1885	6.1652	6.2453	6.1324	6.6376	5.9666
ANP32BP1	-0.1338	-2.6788	-0.2336	0.82008	0.9202	-5.5508	-2.0418	-3.2804	-3.098	-2.4587	-2.6278	-2.5661
ANP32C	0.31144	-1.9924	0.61431	0.55295	0.77167	-5.5194	-2.3932	-2.3873	-1.8025	-1.6622	-2.4965	-1.2124
ANP32E	0.10989	7.638	1.7563	0.11004	0.31748	-6.5254	7.652	7.5681	7.6129	7.5691	7.8106	7.6151
ANPEP	-0.11224	4.8636	-1.0586	0.31507	0.57662	-7.0544	4.9096	4.9911	4.7617	4.7513	4.6764	5.0914
ANTXR2	0.77512	4.705	12.39	2.5187e-07	4.0597e-05	7.4472	4.1995	4.1495	4.9948	4.9759	4.959	4.9514
ANXA1	1.3111	5.9292	24.896	3.2285e-10	5.8651e-07	14.209	5.1219	5.0891	6.2836	6.2489	6.4413	6.3904
ANXA11	0.33137	5.853	4.8562	0.00069614	0.010311	-1.1893	5.6704	5.68	5.91	5.8108	5.9292	6.1177
ANXA2	-0.36279	6.9817	-7.6773	1.8466e-05	0.00073906	2.5613	7.2382	7.2247	6.8529	6.8495	6.9109	6.8141
ANXA2P1	-1.4843	-3.2862	-2.1269	0.059757	0.21818	-3.8262	-2.0418	-3.2804	-3.3875	-3.0062	-3.8502	-4.151
ANXA2P2	0.19064	-1.1611	0.52708	0.60981	0.80783	-5.8583	-1.1015	-1.1335	-1.8025	-0.92525	-0.79126	-1.2124
ANXA2R	-0.083012	2.4496	-0.58627	0.57089	0.7827	-6.8351	2.3468	2.6231	2.4733	2.6399	2.4496	2.1649
ANXA3	-0.32242	-3.3385	-0.37037	0.71895	0.86834	-5.3003	-2.6074	-4.5028	-3.3875	-2.0628	-3.3196	-4.151
ANXA4	0.23135	5.6386	2.2299	0.050255	0.19696	-5.5514	5.5515	5.5247	5.6234	5.673	5.9347	5.5244
ANXA5	-0.0051237	6.1641	-0.093997	0.927	0.96988	-7.8369	6.2106	6.1799	6.1441	6.0843	6.2375	6.1278
ANXA6	-0.034882	5.0572	-0.52991	0.60792	0.80698	-7.513	5.0465	5.1002	5.0467	5.0445	4.9746	5.1305
ANXA7	0.094424	7.1901	2.2392	0.049475	0.19458	-5.7328	7.1986	7.1978	7.0841	7.0703	7.2772	7.3127
ANXA9	-0.093693	2.7566	-0.91714	0.38099	0.63685	-6.6681	2.7808	2.7228	2.7847	2.9026	2.6541	2.6945
AOC2	-0.41828	0.043253	-1.8079	0.10123	0.30235	-4.8482	0.3561	0.45142	-0.18235	-0.1067	0.11947	-0.37842
AOC3	-0.37321	-1.8949	-0.80991	0.43713	0.68521	-5.5183	-1.6365	-1.0433	-1.8025	-3.2472	-1.8106	-1.8291
AP000223.42	0.66467	-2.7213	1.2916	0.226	0.48064	-4.8464	-2.8589	-3.2804	-2.6505	-3.0062	-2.4965	-2.0355
AP000240.9	0.026475	-1.123	0.073879	0.94259	0.97545	-5.956	-1.3205	-1.1335	-0.67475	-1.2803	-1.3477	-0.98109
AP000253.1	-0.43808	-1.5908	-1.0073	0.33792	0.59841	-5.3335	-1.3686	-1.5642	-1.9135	-0.97869	-1.8908	-1.8291
AP000254.8	-0.36841	-1.6483	-0.8922	0.39357	0.64638	-5.412	-1.6966	-1.2298	-1.6032	-1.3491	-1.7347	-2.2765
AP000255.6	-0.90455	-3.1238	-1.5308	0.15731	0.39234	-4.5427	-2.8589	-2.1808	-3.3875	-3.5367	-3.8502	-2.9286
AP000266.7	-0.46144	-0.65365	-1.2514	0.2397	0.49787	-5.3563	-0.19594	-0.47303	-1.1311	-0.29722	-0.48092	-1.3437
AP000320.6	1.6006	-2.6265	2.0143	0.072109	0.24525	-3.9759	-3.3443	-4.5028	-2.6505	-1.4212	-2.6278	-1.2124
AP000347.2	-0.067779	0.79888	-0.34803	0.73515	0.87672	-6.4904	0.80947	0.92349	0.94245	0.69427	0.89281	0.53081
AP000350.5	-0.30703	-0.33455	-0.98779	0.34692	0.60677	-5.6687	-0.091355	-0.66147	-0.11445	0.1882	-0.45023	-0.87799
AP000351.10	0.21467	-0.94921	0.49326	0.63265	0.82151	-5.8415	-1.825	-0.53315	-0.67475	-0.33157	-1.2387	-1.0921
AP000357.4	0.7471	-2.6961	1.3422	0.20966	0.4605	-4.7919	-2.4963	-3.7658	-2.857	-2.6192	-2.1621	-2.2765
AP000358.5	-0.19237	-2.94	-0.25997	0.80024	0.91027	-5.4169	-2.3932	-3.7658	-2.6505	-2.1831	-2.4965	-4.151
AP000432.1	-0.13078	0.75488	-0.58832	0.56957	0.78192	-6.3309	0.54967	0.80708	1.0647	0.88584	0.32865	0.89338
AP000437.3	-1.2809	-1.3874	-3.3293	0.007791	0.05708	-2.233	-0.91138	-1.1335	-0.94268	-0.92525	-2.3762	-2.0355
AP000442.1	0.15083	-1.9541	0.36154	0.72533	0.8716	-5.6848	-2.2068	-1.6954	-1.9135	-2.0628	-1.8106	-2.0355
AP000442.4	0.25916	-0.45419	0.86574	0.40724	0.65956	-5.8149	-0.77549	-0.11046	-0.58011	-0.47779	-0.17459	-0.60669
AP000487.5	-0.22694	-0.40044	-0.89254	0.3934	0.64637	-5.7993	-0.19594	-0.25485	-0.44887	-0.47779	-0.33358	-0.69158
AP000560.3	0.53839	-0.99742	1.4595	0.1756	0.4188	-4.9815	-1.2739	-1.6954	-1.0028	-0.36676	-0.95399	-0.69158
AP000577.2	-0.26685	0.065103	-1.1415	0.28066	0.54212	-5.6447	0.097502	0.06201	0.45383	0.21225	-0.12527	-0.30971
AP000640.10	1.4286	-1.9292	2.5882	0.027356	0.13406	-3.2707	-3.0033	-2.6283	-0.88497	-2.0628	-1.3477	-1.6485
AP000662.4	-0.63188	-0.18814	-2.1085	0.061629	0.22232	-4.2945	-0.051554	0.42006	-0.21754	0.034853	-0.33358	-0.98109
AP000679.2	-0.44166	-2.6307	-0.83364	0.42425	0.67389	-5.2799	-2.4963	-2.1808	-2.4699	-3.2472	-3.1132	-2.2765
AP000692.10	-0.20936	-0.092509	-0.74223	0.47529	0.71468	-5.9734	-0.35641	0.32165	0.15685	0.034853	-0.33358	-0.37842
AP000692.9	0.083779	0.078614	0.36023	0.72628	0.87186	-6.2861	0.26447	-0.20509	0.012463	0.034853	0.21832	0.14667
AP000695.4	-0.20542	-2.2674	-0.38503	0.7084	0.86329	-5.5723	-2.3932	-2.1808	-1.6032	-2.6192	-2.7722	-2.0355
AP000695.6	-0.77654	-2.8439	-1.191	0.26156	0.52295	-4.8898	-2.7277	-2.0003	-3.098	-2.3143	-2.7722	-4.151
AP000704.5	1.0509	-1.3644	2.5599	0.028705	0.13812	-3.3661	-1.6966	-2.6283	-0.88497	-1.152	-1.0428	-0.78178
AP000769.7	0.53648	-1.7708	1.2599	0.23674	0.49429	-5.0354	-2.2068	-2.1808	-1.8025	-1.2803	-1.8106	-1.3437
AP000936.1	-0.062063	1.904	-0.35087	0.73308	0.87531	-6.8255	2.0179	1.7764	1.7418	1.948	1.7044	2.2356
AP000962.1	1.0418	-3.1651	1.2571	0.23771	0.49571	-4.7672	-4.4439	-2.9178	-2.3095	-3.0062	-2.1621	-4.151
AP001062.7	0.06487	1.6325	0.33853	0.74208	0.881	-6.716	1.4177	1.4897	1.7234	1.9336	1.3153	1.9151
AP001171.1	0.22339	1.7526	1.2237	0.24956	0.50953	-6.064	1.6706	1.5776	1.8897	1.8746	2.0594	1.4439
AP001258.4	-0.01251	0.613	-0.063609	0.95055	0.97904	-6.488	0.56255	0.65373	0.62252	0.79323	0.6734	0.37255
AP001347.6	-0.16439	-3.0703	-0.16212	0.87449	0.94575	-5.4108	-2.6074	-3.2804	-2.6505	-2.6192	-1.5282	-5.736
AP001350.4	0.27164	-0.49158	1.0834	0.30444	0.56538	-5.6211	-0.45681	-0.66147	-0.67475	-0.72933	-0.30584	-0.12127
AP001372.2	0.21768	0.26995	0.99391	0.34407	0.60435	-5.8866	0.024898	0.21604	0.51942	0.21225	0.27454	0.37255
AP001412.1	-0.73254	-0.64119	-2.3451	0.041365	0.17352	-3.8174	-0.30871	-0.41531	-0.62666	-0.19882	-0.95399	-1.3437
AP001429.1	0.14143	-0.33592	0.43862	0.67041	0.84214	-6.081	-0.48304	-0.35982	-0.21754	0.034853	-0.0088559	-0.98109
AP001432.14	-0.023937	-1.2675	-0.072205	0.94388	0.97598	-6.0292	-0.80828	-1.2298	-1.6032	-2.1831	-1.0893	-0.69158
AP001437.1	0.46012	-1.2026	1.3763	0.19922	0.44786	-5.0634	-1.5788	-1.2298	-1.1311	-1.152	-0.91156	-1.2124
AP001462.6	0.11834	-1.333	0.35006	0.73367	0.87573	-5.8443	-1.4183	-1.4439	-1.3479	-1.152	-1.2922	-1.3437
AP001469.7	-0.57462	-1.0944	-1.6603	0.12832	0.34814	-4.7151	-0.80828	-0.87828	-0.7245	-1.2148	-1.2922	-1.6485
AP001469.9	0.030412	0.54207	0.15558	0.87951	0.94801	-6.4352	0.48348	0.2873	0.75549	0.82477	0.44752	0.45385
AP001505.10	-0.44944	0.49313	-2.2042	0.052484	0.20185	-4.3685	0.76558	0.80708	0.54064	0.13888	0.2928	0.41377
AP001619.2	-0.20759	0.29107	-0.94065	0.3694	0.62752	-5.9501	0.52356	0.2873	0.38512	0.21225	0.34624	-0.0080546
AP001625.6	-0.84784	-1.6926	-1.8477	0.094869	0.2904	-4.3264	-1.1851	-1.6954	-1.8025	-1.0342	-2.1621	-2.2765
AP001628.6	-0.37059	-0.67898	-1.1182	0.29003	0.55141	-5.4162	-0.56473	-0.87828	-0.081659	-0.23088	-0.83026	-1.488
AP002954.3	-0.96085	-2.1952	-1.93	0.082905	0.26799	-4.1541	-1.5233	-2.0003	-2.4699	-1.7524	-2.4965	-2.9286
AP003068.12	1.358	-2.5608	2.6363	0.025202	0.12712	-3.193	-3.3443	-3.2804	-2.4699	-2.1831	-1.8106	-2.2765
AP003068.18	-0.62776	-0.95754	-1.934	0.082356	0.26684	-4.3573	-0.80828	-0.59588	-0.7245	-0.72933	-1.2387	-1.6485
AP003068.23	-0.48308	1.3354	-2.7299	0.021486	0.11454	-3.7237	1.5848	1.7002	1.0048	1.4583	1.1548	1.1095
AP006216.10	-0.45187	-2.5621	-0.8225	0.43027	0.67946	-5.239	-2.7277	-2.3873	-1.9135	-2.4587	-3.3196	-2.5661
AP006222.2	-0.62419	-2.1862	-0.89542	0.39193	0.6454	-5.2592	-2.0418	-1.4439	-2.3095	-1.5773	-1.5938	-4.151
AP006621.5	0.14374	0.70764	0.74355	0.47452	0.71408	-6.2522	0.54967	0.78263	0.80893	0.51255	0.72811	0.86394
AP006621.6	-0.48602	-1.2314	-1.2807	0.22964	0.48517	-5.1215	-1.1015	-1.0433	-1.1311	-0.72933	-1.3477	-2.0355
AP1AR	0.12577	4.5328	1.7644	0.10861	0.31498	-6.0855	4.5223	4.5261	4.4461	4.4514	4.7117	4.539
AP1B1	-0.17609	7.6699	-3.0837	0.011777	0.076097	-4.3468	7.784	7.8243	7.5883	7.5498	7.5471	7.7261
AP1G1	0.1312	7.0269	2.9008	0.016061	0.094638	-4.5998	6.9838	7.016	6.9451	6.949	7.1001	7.1673
AP1G2	-0.051441	5.6965	-0.68245	0.5107	0.74259	-7.5164	5.6652	5.6833	5.7208	5.8162	5.5271	5.7664
AP1M1	0.090116	6.6376	1.1869	0.26313	0.52466	-7.1738	6.5784	6.6047	6.613	6.6278	6.5615	6.8403
AP1S1	0.14086	5.7531	2.7015	0.022549	0.11828	-4.7868	5.6955	5.7566	5.6944	5.6534	5.8711	5.8476
AP1S2	0.6831	4.3392	9.7496	2.2617e-06	0.00016263	5.1569	4.0185	4.0377	4.3427	4.2175	4.7066	4.7121
AP1S3	-0.0030779	1.5187	-0.020086	0.98438	0.99391	-6.8025	1.5399	1.801	1.3674	1.23	1.6907	1.4832
AP2A1	-0.38911	7.9538	-4.6251	0.0009833	0.013411	-1.7787	8.12	8.1625	7.9548	7.9457	7.5997	7.9401
AP2A2	-0.0085185	5.7922	-0.12015	0.90678	0.96086	-7.7812	5.7933	5.8082	5.7552	5.7668	5.697	5.9325
AP2B1	-0.030186	8.2259	-0.38556	0.70802	0.86322	-7.9706	8.2576	8.2358	8.2305	8.2313	8.355	8.0451
AP2M1	-0.16551	8.0876	-3.7711	0.0037585	0.034475	-3.2031	8.1873	8.1979	8.0499	8.0263	7.9844	8.0797
AP2S1	-0.1609	6.8645	-2.6869	0.023117	0.1203	-4.9447	6.9405	6.9561	6.8556	6.8344	6.7056	6.895
AP3B1	0.11562	6.8105	1.8625	0.092612	0.28642	-6.2848	6.7909	6.7786	6.7689	6.7506	6.9874	6.7864
AP3D1	-0.033755	7.7014	-0.35455	0.7304	0.87424	-7.9389	7.7276	7.7437	7.6345	7.6542	7.5283	7.9199
AP3M1	0.072627	6.4586	1.3499	0.20727	0.45729	-6.9617	6.4868	6.4526	6.4122	6.3263	6.5855	6.4883
AP3M2	-0.028195	5.4988	-0.53855	0.60216	0.80296	-7.5878	5.5397	5.543	5.4507	5.4441	5.5314	5.4838
AP3S1	-0.009089	6.339	-0.15395	0.88076	0.94875	-7.8475	6.3465	6.3503	6.3631	6.3242	6.4081	6.2417
AP3S2	-0.042872	2.5514	-0.33226	0.74666	0.88367	-6.9881	2.5958	2.3593	2.7847	2.5765	2.4291	2.5632
AP4B1	-0.19778	4.731	-2.9422	0.014969	0.090058	-4.201	4.8963	4.8974	4.6404	4.5955	4.7535	4.6028
AP4E1	0.0074214	5.4905	0.14332	0.88893	0.95222	-7.7336	5.5192	5.5154	5.4145	5.4403	5.5188	5.5349
AP4M1	-0.069637	4.0701	-0.89562	0.39183	0.64529	-7.0342	4.0892	4.0909	4.0946	4.0524	3.9608	4.1328
AP4S1	0.06922	3.2849	0.73873	0.47731	0.7164	-6.9623	3.2275	3.1578	3.3021	3.452	3.2479	3.322
AP5B1	0.043403	4.9852	0.45737	0.65733	0.8339	-7.5429	4.9052	5.0525	4.9279	4.9314	4.8857	5.2087
AP5M1	0.096047	6.2208	1.9237	0.083764	0.26968	-6.1261	6.2337	6.2283	6.1197	6.103	6.3632	6.277
AP5S1	-0.085517	3.7819	-1.0493	0.3191	0.58048	-6.8195	3.8196	3.8296	3.7724	3.7394	3.6795	3.8509
AP5Z1	-0.032015	5.4916	-0.32468	0.75222	0.88575	-7.6788	5.4425	5.4921	5.5251	5.5416	5.2806	5.6676
APAF1	0.24302	5.0451	3.9739	0.0027096	0.027737	-2.4836	4.8511	4.9116	5.176	5.1116	5.1401	5.0802
APBA2	2.5981	-3.4714	3.3561	0.0074499	0.055475	-2.4401	-4.9293	-4.5028	-4.2355	-2.6192	-1.9757	-2.5661
APBA3	0.016223	4.2577	0.16373	0.87325	0.94494	-7.4804	4.1523	4.251	4.3533	4.2814	4.0904	4.4176
APBB1	0.077033	-1.8465	0.14531	0.8874	0.95154	-5.7081	-2.2068	-2.1808	-1.0028	-1.8486	-2.4965	-1.3437
APBB1IP	0.010862	5.8477	0.2059	0.84107	0.93074	-7.7557	5.7115	5.7667	6.0451	6.0811	5.7627	5.7188
APBB3	0.083077	2.8903	0.6081	0.55689	0.77437	-6.9361	2.6268	2.9374	2.9284	3.2167	2.8175	2.8148
APC	-0.016821	6.5121	-0.31927	0.75619	0.88776	-7.8266	6.581	6.4599	6.4957	6.5115	6.508	6.5164
APC2	0.15165	3.4283	1.4664	0.17374	0.41659	-6.2446	3.287	3.4688	3.3207	3.411	3.4239	3.6585
APCDD1	4.0121	-1.8432	6.8983	4.549e-05	0.00142	1.1735	-4.0813	-3.7658	-1.6032	-1.9517	-0.14972	0.49284
APEH	-0.10875	8.3197	-2.0864	0.063949	0.22752	-6.0806	8.3964	8.4294	8.2483	8.2213	8.2318	8.3911
APEX1	-0.029306	6.8876	-0.24059	0.81481	0.91824	-7.8929	6.9569	6.8933	6.9296	6.8188	7.1154	6.6119
APEX2	-0.17506	5.4302	-2.3732	0.039435	0.16876	-5.2845	5.5295	5.5201	5.4217	5.3544	5.2598	5.4958
APH1A	0.10083	6.6235	1.5827	0.14507	0.37401	-6.6703	6.5689	6.6042	6.6289	6.5412	6.6067	6.7913
APH1B	0.50986	3.5006	6.1772	0.00011181	0.0026362	1.1857	3.2255	3.2046	3.5074	3.5914	3.7087	3.7659
API5	-0.032974	7.7467	-0.7956	0.44503	0.69141	-7.6774	7.8262	7.8241	7.6468	7.5947	7.7784	7.8098
API5P1	0.40986	-1.5873	0.88486	0.39733	0.65017	-5.4472	-1.4699	-2.1808	-1.6032	-1.2803	-0.95399	-2.0355
APIP	-0.051223	5.1253	-0.81298	0.43545	0.68342	-7.3323	5.2166	5.1855	5.0271	5.052	5.2066	5.0641
APITD1	0.010553	0.60383	0.050109	0.96104	0.98386	-6.5089	0.60052	0.57047	0.36147	0.76099	0.49562	0.83388
APLF	0.48435	2.2232	4.0948	0.0022352	0.024135	-1.6482	1.9312	1.9512	2.3344	2.335	2.4738	2.3139
APLN	-0.27755	-1.8661	-0.47172	0.64741	0.83003	-5.5156	-2.297	-2.3873	-1.1998	-0.26367	-2.7722	-2.2765
APLP2	0.048029	8.5861	1.0574	0.31561	0.57714	-7.4975	8.5417	8.521	8.6846	8.6191	8.6239	8.526
APMAP	0.048495	6.3998	1.0302	0.32756	0.58934	-7.3192	6.4089	6.4188	6.3285	6.31	6.4377	6.4949
APOA1	0.64618	-2.7169	1.1695	0.26975	0.53134	-4.9641	-3.1638	-2.9178	-2.3095	-3.2472	-2.6278	-2.0355
APOBEC2	-1.9612	-3.0417	-2.8965	0.016177	0.095066	-2.9404	-2.7277	-2.1808	-2.0338	-2.4587	-4.6982	-4.151
APOBEC3B	0.035406	4.4958	0.27114	0.79189	0.90573	-7.5174	4.524	4.5606	4.4475	4.4539	4.769	4.2197
APOBEC3C	-0.12795	6.5787	-2.3307	0.042385	0.17566	-5.5148	6.6938	6.6757	6.5253	6.4843	6.6178	6.4756
APOBEC3D	-0.093719	2.5855	-0.75032	0.47061	0.71116	-6.7662	2.6481	2.574	2.7802	2.5101	2.5817	2.4188
APOBEC3F	-0.36851	0.52722	-1.2455	0.24178	0.50032	-5.6965	0.80947	0.92349	0.51942	0.43294	0.85643	-0.37842
APOBEC3G	-0.29346	2.5434	-2.5703	0.0282	0.13691	-4.2894	2.7275	2.5233	2.62	2.6487	2.3528	2.3881
APOBR	0.1913	2.116	1.0598	0.31456	0.57616	-6.3678	2.1085	2.026	2.3161	1.867	2.4208	1.9575
APOC1	0.21347	4.4045	3.0171	0.013183	0.081956	-3.9982	4.265	4.3163	4.3652	4.4589	4.4642	4.5575
APOE	0.23443	1.7503	1.3874	0.19593	0.44355	-5.8472	1.3598	1.6057	2.0087	2.0179	1.5383	1.9714
APOL1	-0.20726	5.1925	-2.8216	0.018377	0.10344	-4.468	5.2593	5.1948	5.3663	5.3381	5.1076	4.8888
APOL2	0.0084278	5.4499	0.12206	0.90531	0.96	-7.7298	5.5616	5.3804	5.421	5.3591	5.5227	5.4545
APOL3	-0.066992	-0.10588	-0.2637	0.79745	0.90897	-6.2442	-0.11167	0.020787	0.12911	-0.26367	-0.031398	-0.37842
APOL4	-0.32181	7.6605	-6.9501	4.275e-05	0.0013731	1.6142	7.6668	7.676	7.9771	7.9577	7.3937	7.2918
APOL6	0.12003	1.2965	0.70732	0.49577	0.73025	-6.4493	1.1282	1.3961	1.3792	1.1326	1.2791	1.4637
APOLD1	0.41093	2.1357	3.4814	0.0060477	0.047738	-2.6397	1.8389	1.8606	2.2912	2.2792	2.2302	2.3139
APOM	-0.12804	1.1959	-0.70249	0.49865	0.73281	-6.4272	1.4106	1.261	1.2042	1.0007	1.3765	0.92224
APOO	0.010945	3.6565	0.13854	0.89261	0.95365	-7.3678	3.7167	3.753	3.5577	3.4393	3.7506	3.7214
APOOL	0.0017131	3.1244	0.015987	0.98756	0.99492	-7.2267	3.0853	3.272	3.0919	3.0731	3.229	2.9953
APOPT1	-0.015511	3.1086	-0.15754	0.878	0.94708	-7.2015	3.0583	3.2046	3.0919	3.156	3.1385	3.0021
APP	-0.030554	7.8954	-0.48997	0.63489	0.82236	-7.8948	7.9683	7.9224	7.8574	7.8148	8.0108	7.7989
APPBP2	0.14662	5.3668	2.279	0.046259	0.18659	-5.43	5.2823	5.3547	5.3499	5.3326	5.5174	5.364
APPL1	0.32378	6.3301	6.5557	6.9167e-05	0.0019016	1.2098	6.2119	6.1985	6.2977	6.2154	6.5373	6.5199
APPL2	0.1015	4.4071	1.4018	0.1917	0.43825	-6.5536	4.4199	4.3185	4.399	4.3749	4.5283	4.4023
APRT	-0.30659	7.1211	-2.9951	0.013685	0.084187	-4.4442	7.2672	7.3119	7.0987	7.0299	6.7984	7.2202
APTR	0.068226	2.1515	0.57946	0.5753	0.78508	-6.7766	2.0684	2.193	2.1115	2.1545	2.1573	2.224
APTX	-0.13029	5.4235	-2.3682	0.039777	0.16973	-5.2989	5.5209	5.5939	5.2838	5.3085	5.4324	5.4017
AQP1	-1.5191	1.3429	-7.1285	3.4598e-05	0.0011707	2.7738	1.7572	1.973	1.8392	1.6288	0.11947	0.73976
AQP10	-0.99885	2.0852	-6.1617	0.00011408	0.0026755	1.4955	2.2585	2.4553	2.4341	2.5484	1.1845	1.6303
AQP11	0.26111	0.12603	1.1555	0.27516	0.53674	-5.7317	0.079691	0.10209	-0.29061	0.0076318	0.21832	0.63906
AQP3	-1.3927	5.2202	-23.339	6.0371e-10	7.6456e-07	13.57	5.6871	5.7128	5.642	5.6551	4.2877	4.3368
AQR	0.01877	7.1615	0.39947	0.69808	0.85754	-7.8699	7.226	7.1618	7.092	7.0656	7.2466	7.1767
ARAF	-0.20315	5.7706	-2.599	0.026858	0.13231	-4.9568	5.8133	5.9336	5.7659	5.7371	5.5614	5.8124
ARAP1	0.068872	6.1367	0.74619	0.473	0.71259	-7.533	6.0395	6.0674	6.236	6.1732	5.9744	6.3298
ARC	1.2141	-0.73523	3.4459	0.0064148	0.049731	-2.0807	-1.5788	-2.0003	0.10082	-0.1067	-0.64504	-0.18139
ARCN1	0.023493	6.5425	0.35631	0.72912	0.87341	-7.8204	6.5437	6.5743	6.4919	6.4509	6.4893	6.7052
AREG	4.0364	-1.6472	7.7879	1.6337e-05	0.0006674	1.6943	-4.0813	-3.7658	-0.94268	-1.0919	0.17959	-0.18139
AREGB	3.5976	-3.9163	3.6682	0.0044457	0.038752	-2.3651	-7.2512	-4.5028	-3.75	-2.7997	-2.2652	-2.9286
AREL1	-0.16015	6.7947	-3.6515	0.0045692	0.039499	-3.2859	6.9239	6.9292	6.6978	6.6802	6.7525	6.7844
ARF1	-0.045436	7.546	-1.0169	0.33355	0.59424	-7.4521	7.582	7.6189	7.5128	7.4642	7.5815	7.5168
ARF1P2	-0.27221	-2.5804	-0.47187	0.64731	0.83002	-5.4578	-2.4963	-2.3873	-2.857	-1.9517	-2.3762	-3.414
ARF3	0.1774	5.2834	2.8683	0.016973	0.09825	-4.426	5.1894	5.2493	5.2301	5.2201	5.3399	5.4716
ARF4	-0.012724	6.3549	-0.27881	0.78616	0.90258	-7.8277	6.4257	6.4183	6.2453	6.221	6.4113	6.4077
ARF4-AS1	-0.20061	-0.16822	-0.70435	0.49754	0.73164	-6.0576	-0.091355	0.45142	-0.82947	-0.19882	-0.031398	-0.30971
ARF5	-0.06421	4.951	-0.92292	0.37811	0.63425	-7.1922	4.9184	5.003	4.9938	4.9733	4.8266	4.9911
ARF6	0.086862	8.0119	2.0436	0.068683	0.2384	-6.1167	7.9471	7.9593	8.0576	8.0375	8.0737	7.9963
ARFGAP1	-0.16392	6.2639	-2.1697	0.055622	0.20947	-5.7374	6.3805	6.3161	6.2384	6.2232	6.0784	6.3465
ARFGAP2	-0.052256	7.1933	-0.96252	0.35884	0.61798	-7.4713	7.2394	7.2394	7.1399	7.1458	7.1178	7.2772
ARFGAP3	0.03358	5.5788	0.57769	0.57645	0.78576	-7.5765	5.5747	5.5974	5.5857	5.4995	5.6539	5.5615
ARFGEF1	0.23513	7.3594	5.6015	0.00024077	0.0047326	-0.22838	7.2476	7.2329	7.3797	7.3423	7.4701	7.4839
ARFGEF2	0.018647	7.3313	0.40393	0.6949	0.85542	-7.8824	7.3497	7.3207	7.2738	7.3234	7.3218	7.3986
ARFIP1	0.082146	5.5851	1.5179	0.16048	0.39701	-6.6224	5.6132	5.5284	5.5171	5.5309	5.6601	5.6612
ARFIP2	-0.021098	5.4598	-0.28384	0.78242	0.90037	-7.698	5.4576	5.5602	5.3759	5.3585	5.3912	5.6155
ARFRP1	0.050983	4.7407	0.59003	0.56847	0.78126	-7.4205	4.6865	4.7554	4.6864	4.7107	4.659	4.9461
ARG1	-1.5463	-2.1268	-2.4761	0.03311	0.15118	-3.4039	-1.6365	-1.5642	-1.8025	-0.97869	-2.6278	-4.151
ARG2	-0.32757	3.673	-3.5887	0.0050658	0.042427	-2.7858	3.6044	3.514	4.281	4.1521	3.2479	3.2384
ARGLU1	0.014889	6.757	0.2818	0.78394	0.90137	-7.8642	6.7146	6.7454	6.7362	6.8617	6.7486	6.7354
ARHGAP1	-0.033363	4.6262	-0.26394	0.79727	0.90897	-7.5489	4.5876	4.7026	4.5094	4.6237	4.4182	4.916
ARHGAP10	0.94643	-1.9461	1.9218	0.084024	0.27018	-4.2061	-1.8937	-3.2804	-1.9135	-1.8486	-1.5282	-1.2124
ARHGAP11A	0.0084702	7.6019	0.14798	0.88535	0.95094	-7.9873	7.6655	7.6156	7.5455	7.5023	7.7282	7.5545
ARHGAP11B	-0.024804	4.9177	-0.30475	0.7669	0.89382	-7.5819	4.9352	4.9045	4.99	4.9512	4.9971	4.7286
ARHGAP12	0.16685	4.9885	2.4404	0.035184	0.15741	-5.0597	4.7257	4.738	5.3581	5.3585	4.9583	4.7925
ARHGAP15	0.46263	6.5167	9.5661	2.6824e-06	0.00018707	4.6912	6.2766	6.2679	6.564	6.5319	6.7669	6.6932
ARHGAP17	0.067418	4.3466	0.99862	0.3419	0.60221	-6.9999	4.2845	4.3583	4.3336	4.3601	4.3983	4.3448
ARHGAP18	0.79133	5.8011	14.7	5.0692e-08	1.3827e-05	9.0057	5.4152	5.3681	5.8501	5.8113	6.2173	6.1448
ARHGAP19	-0.076006	5.3595	-1.3348	0.21199	0.46375	-6.8219	5.4451	5.3905	5.3087	5.2994	5.3145	5.3991
ARHGAP21	0.038555	5.8262	0.72163	0.48731	0.72418	-7.5142	5.8493	5.7683	5.8282	5.7955	5.8385	5.8774
ARHGAP23	-1.0827	3.5409	-9.8843	1.9987e-06	0.00015284	5.4408	3.9441	4.0195	3.6113	3.7942	2.7953	3.081
ARHGAP25	0.24437	1.3466	1.3852	0.19657	0.44426	-5.7288	1.0295	1.1697	1.8046	1.5077	1.3851	1.1829
ARHGAP26	-0.50656	0.37379	-1.7327	0.11431	0.32428	-5.0445	1.0842	0.14108	0.26279	0.21225	0.25604	0.28639
ARHGAP27	0.21933	-0.80271	0.58569	0.57127	0.783	-5.8413	-1.2739	-0.66147	-0.44887	-0.36676	-0.57714	-1.488
ARHGAP30	-0.026219	-0.56153	-0.072273	0.94383	0.97598	-6.1168	-0.43105	-1.1335	-0.049598	-0.64052	-0.87034	-0.24412
ARHGAP32	0.37987	1.0729	2.1564	0.056873	0.21184	-4.5935	0.76558	1.0518	0.94245	1.1199	1.1747	1.383
ARHGAP33	0.031262	3.8636	0.27411	0.78966	0.90438	-7.3442	3.6699	3.7934	3.9514	4.1844	3.6479	3.9347
ARHGAP35	0.13727	6.9542	3.123	0.011021	0.072829	-4.2082	6.9183	6.9033	6.9098	6.8902	7.0295	7.0744
ARHGAP39	0.62064	0.94764	2.8378	0.017877	0.10156	-3.4154	0.41411	0.57047	1.1361	1.1699	0.89281	1.5024
ARHGAP4	0.28787	6.4888	4.7555	0.00080846	0.011504	-1.4289	6.3204	6.3668	6.4947	6.4675	6.5544	6.7288
ARHGAP42	0.24546	3.6525	2.9252	0.015406	0.091972	-3.972	3.5028	3.4061	3.8056	3.7394	3.6795	3.7817
ARHGAP44	-0.71183	-2.4739	-1.2834	0.22876	0.48402	-4.8613	-1.825	-2.6283	-2.1651	-2.3143	-2.4965	-3.414
ARHGAP45	0.083873	6.2689	0.91671	0.38121	0.63702	-7.4048	6.1166	6.2518	6.3201	6.3519	6.1215	6.4517
ARHGAP5	-0.0051387	4.4813	-0.061995	0.95181	0.9796	-7.5386	4.5141	4.3788	4.5518	4.5874	4.5321	4.3234
ARHGAP5-AS1	0.045626	-2.0147	0.11266	0.91257	0.96394	-5.7433	-1.8937	-2.0003	-2.0338	-2.3143	-1.8106	-2.0355
ARHGAP6	0.058786	2.6848	0.4874	0.63664	0.82338	-6.984	2.5642	2.8281	2.5537	2.6836	2.6647	2.8148
ARHGAP9	-0.17147	3.1777	-1.6931	0.12179	0.33712	-5.8483	3.2694	3.1387	3.1992	3.2892	2.9897	3.1799
ARHGDIA	0.023304	6.1672	0.28135	0.78427	0.90158	-7.8017	6.1675	6.2095	6.1077	6.0476	6.083	6.3878
ARHGDIB	0.63954	7.0258	13.754	9.4876e-08	2.0026e-05	8.2325	6.7258	6.7081	7.0447	6.9642	7.3679	7.3443
ARHGDIG	-0.6897	2.3134	-4.798	0.00075883	0.011082	-0.54261	2.6238	2.4859	2.417	2.4201	1.7448	2.1888
ARHGEF1	-0.026091	6.5059	-0.55116	0.59381	0.79826	-7.716	6.4906	6.5418	6.5345	6.4929	6.4821	6.4931
ARHGEF10	-0.27368	6.1799	-4.0628	0.0023514	0.025042	-2.512	6.3532	6.2684	6.2077	6.2027	6.1273	5.92
ARHGEF11	0.56414	3.3075	6.1338	0.00011829	0.0027595	1.1448	3.0399	3.2046	3.2058	3.0862	3.676	3.6325
ARHGEF12	0.20867	8.1017	5.0681	0.0005106	0.0083055	-1.0975	8.0359	7.9703	8.0757	8.0978	8.2146	8.2158
ARHGEF18	0.099127	1.6348	0.73188	0.4813	0.71922	-6.5316	1.6825	1.5196	1.5667	1.5834	1.7248	1.7316
ARHGEF19	-0.15859	1.5824	-0.95359	0.36312	0.62225	-6.2972	1.4457	1.7388	1.6858	1.7322	1.2791	1.6128
ARHGEF2	-0.07211	7.3894	-1.6618	0.12803	0.34762	-6.6351	7.4166	7.4047	7.416	7.4126	7.3103	7.3763
ARHGEF3	-0.017876	0.20659	-0.067244	0.94773	0.97758	-6.2921	-0.012822	0.020787	0.71873	0.84028	0.19909	-0.52652
ARHGEF33	0.26373	2.0099	1.7589	0.10959	0.31665	-5.4367	1.9411	1.6334	2.1942	2.0111	2.0325	2.247
ARHGEF37	-1.0926	1.1594	-5.6168	0.00023577	0.0046653	0.89003	1.5464	1.6738	1.5563	1.3541	0.63097	0.19476
ARHGEF39	-0.050997	4.2066	-0.62351	0.54712	0.76701	-7.2893	4.2199	4.3057	4.156	4.0951	4.129	4.3341
ARHGEF40	0.39043	-0.78101	1.1464	0.27873	0.53992	-5.3884	-1.3686	-1.0433	-0.32857	-0.47779	-1.0893	-0.37842
ARHGEF6	0.46164	7.9284	10.656	1.0103e-06	9.8731e-05	5.6202	7.694	7.6549	8.0013	7.9503	8.1628	8.1071
ARHGEF7	0.015669	5.5901	0.30457	0.76703	0.89382	-7.7016	5.5696	5.5512	5.6216	5.6452	5.5815	5.5718
ARHGEF9	0.15314	4.004	2.1666	0.055905	0.20996	-5.3291	3.8915	3.8737	4.0801	4.0902	4.025	4.0633
ARID1A	0.069138	6.2249	1.2041	0.25669	0.5177	-7.0986	6.1356	6.1682	6.2594	6.3256	6.164	6.2964
ARID1B	0.076268	6.8708	1.5411	0.15479	0.38912	-6.7488	6.7907	6.7985	6.919	6.9613	6.8273	6.9278
ARID2	0.092163	6.2636	1.5715	0.14762	0.378	-6.6434	6.2584	6.2412	6.2089	6.2143	6.4118	6.2467
ARID3A	-0.25452	3.7589	-2.5558	0.028907	0.13852	-4.6177	3.7856	3.7995	3.9808	3.8277	3.4465	3.7132
ARID3B	-0.32599	2.2844	-2.4351	0.0355	0.15814	-4.4346	2.43	2.3676	2.3997	2.4708	2.1967	1.8415
ARID3C	0.38101	-3.8846	0.3279	0.74985	0.88476	-5.2518	-3.0033	-6.0877	-3.098	-4.3847	-4.6982	-2.0355
ARID4A	0.19749	5.3636	1.9199	0.084283	0.27086	-5.9928	5.3174	5.1702	5.4274	5.4403	5.6013	5.2248
ARID4B	0.23207	5.6777	2.6778	0.023481	0.12159	-4.8055	5.598	5.4826	5.7444	5.7371	5.9019	5.6022
ARID5A	0.39929	1.8017	1.8415	0.095839	0.29206	-5.2681	1.5721	1.4745	1.6762	1.9408	1.6976	2.4489
ARID5B	0.92706	3.4517	10.536	1.1201e-06	0.00010468	6.0386	2.9099	2.9374	3.568	3.6388	3.8861	3.7698
ARIH1	0.13151	6.1213	2.2252	0.05066	0.19787	-5.631	6.1158	6.0399	6.0432	6.1197	6.2649	6.144
ARIH2	-0.037676	6.9563	-0.79608	0.44476	0.69137	-7.5976	6.9938	7.0401	6.8975	6.8634	7.0089	6.934
ARIH2OS	-0.10787	-0.058821	-0.40606	0.69338	0.85465	-6.2251	-0.2178	0.25211	-0.049598	-0.19882	-0.33358	0.19476
ARL1	0.010903	5.5776	0.19946	0.84597	0.93347	-7.7395	5.5894	5.6617	5.503	5.4599	5.6459	5.6055
ARL10	-0.037843	1.9009	-0.28089	0.78461	0.90162	-6.8055	1.7516	1.8953	2.0683	2.1912	1.784	1.7152
ARL11	-0.16871	-0.16672	-0.62014	0.54925	0.7683	-6.0257	-0.40574	0.10209	0.18407	0.0076318	-0.36187	-0.52652
ARL13B	0.11637	4.802	1.375	0.19961	0.44832	-6.6686	4.8326	4.6746	4.8736	4.6895	4.9359	4.8061
ARL14EP	-0.07011	4.7051	-1.0003	0.34114	0.60173	-7.085	4.8273	4.771	4.6612	4.4986	4.7336	4.7387
ARL15	0.35785	3.9421	2.523	0.030571	0.14332	-4.7408	3.8697	3.753	3.8866	3.9435	4.3792	3.8205
ARL16	-0.064237	4.4431	-0.93181	0.37373	0.63082	-7.0938	4.466	4.5749	4.3607	4.3493	4.4161	4.4916
ARL17A	0.086275	0.99542	0.52861	0.60878	0.80737	-6.4555	0.89343	0.92349	1.0647	1.1326	1.0078	0.95053
ARL17B	0.17018	-0.37848	0.61329	0.55359	0.77188	-5.9902	-0.40574	-0.59588	-0.25361	-0.19882	-0.12527	-0.69158
ARL2	-0.30025	4.4182	-3.5559	0.0053472	0.044136	-3.0717	4.5174	4.5732	4.4206	4.4425	4.1455	4.41
ARL2BP	-0.0055257	4.9576	-0.063814	0.9504	0.979	-7.6475	4.9481	4.9804	4.9745	4.8599	4.8507	5.1321
ARL3	-0.14964	2.6712	-1.3806	0.19794	0.44607	-6.1428	2.7558	2.7733	2.6786	2.6749	2.6855	2.4588
ARL4A	-0.12347	6.6067	-2.687	0.023116	0.1203	-4.909	6.6165	6.6164	6.7247	6.7042	6.5126	6.4658
ARL4C	-0.56015	-4.2957	-0.39174	0.7036	0.8606	-5.1634	-5.6663	-2.9178	-3.75	-4.3847	-7.0201	-2.0355
ARL4D	0.31505	1.4759	1.9592	0.078997	0.25971	-4.9479	1.1368	1.0312	1.9304	1.8287	1.3331	1.5949
ARL5A	-0.017132	6.1954	-0.36523	0.72267	0.8704	-7.7729	6.2234	6.2367	6.132	6.1582	6.2155	6.2069
ARL5B	0.073026	5.3932	1.3484	0.20774	0.45807	-6.8041	5.3623	5.3126	5.4408	5.412	5.4143	5.4169
ARL6	0.076312	2.9136	0.69558	0.50278	0.73602	-6.9035	2.957	2.7034	2.9365	2.9569	2.9121	3.0156
ARL6IP1	0.049887	7.6159	1.1162	0.29085	0.55235	-7.3547	7.6053	7.6469	7.5542	7.5513	7.7099	7.628
ARL6IP1P2	0.87614	-2.9452	1.0726	0.30905	0.57017	-4.9868	-4.4439	-2.3873	-1.9135	-3.5367	-3.1132	-2.2765
ARL6IP4	0.61176	-2.0673	1.4804	0.17006	0.4119	-4.7562	-2.297	-2.3873	-2.1651	-2.0628	-1.6625	-1.8291
ARL6IP5	0.14372	5.9334	1.6563	0.12914	0.34934	-6.4739	5.8789	5.8218	6.0122	5.9509	6.1273	5.8095
ARL6IP6	0.084739	4.6948	1.3306	0.21334	0.46508	-6.6859	4.546	4.6239	4.8557	4.8321	4.673	4.638
ARL8A	0.17634	3.2154	1.6908	0.12224	0.33791	-5.8699	3.1677	3.0024	3.1925	3.2863	3.2171	3.4264
ARL8B	0.1712	7.0081	3.8509	0.0033025	0.031857	-2.9628	6.876	6.9184	7.0732	7.0538	7.0815	7.0456
ARMC1	-0.10445	7.0133	-1.7557	0.11014	0.31767	-6.4665	7.1352	7.0908	6.9336	6.9235	7.0913	6.9054
ARMC10	0.038876	5.9024	0.67714	0.51392	0.74471	-7.5576	5.9217	5.8668	5.9013	5.8744	5.9889	5.8616
ARMC10P1	-0.70823	-1.8158	-1.619	0.137	0.3614	-4.6801	-1.4699	-0.95845	-1.9135	-2.7997	-2.2652	-1.488
ARMC12	0.69999	-1.2788	1.7507	0.11105	0.31889	-4.5331	-2.0418	-1.6954	-1.0028	-0.77588	-1.4655	-0.69158
ARMC2	-0.044041	0.80115	-0.23409	0.81971	0.92007	-6.5462	0.86252	0.96755	0.56155	0.82477	0.95146	0.63906
ARMC5	0.18915	4.5778	1.8927	0.088139	0.27782	-5.8899	4.3813	4.5094	4.6094	4.6349	4.4951	4.8367
ARMC6	-0.22006	7.1201	-3.3068	0.008091	0.058744	-3.9115	7.2704	7.3146	6.9925	6.9717	6.9692	7.202
ARMC7	-0.21841	2.857	-1.7973	0.10297	0.30592	-5.6294	3.0284	2.8924	2.8371	2.7384	2.6506	2.9953
ARMC8	0.12082	7.2118	2.5893	0.027305	0.13395	-5.1487	7.1814	7.176	7.1911	7.1327	7.3334	7.2564
ARMC9	0.66084	0.25911	3.0704	0.012045	0.077234	-2.891	-0.11167	-0.11046	0.38512	0.1882	0.46373	0.73976
ARMCX1	0.61173	5.1145	9.2513	3.6179e-06	0.00022457	4.5307	4.8906	4.8816	5.0129	4.8807	5.4574	5.5638
ARMCX3	0.34582	5.9321	6.5871	6.6526e-05	0.0018517	1.3039	5.8029	5.7256	5.9226	5.9184	6.1387	6.0846
ARMCX4	0.6517	1.3335	3.3609	0.0073904	0.055194	-2.6266	0.91368	0.90095	1.6275	1.6377	1.7381	1.1829
ARMCX5	-0.022779	4.0439	-0.31612	0.75851	0.8895	-7.3942	4.0197	4.0759	4.1035	4.0374	4.0264	4.0004
ARMCX5-GPRASP2	-0.34971	0.35835	-1.5678	0.14849	0.3791	-5.2257	0.60052	0.32165	0.60248	0.43294	0.25604	-0.06355
ARMCX6	0.26432	3.8519	3.4547	0.0063223	0.049251	-3.1371	3.7565	3.7562	3.7452	3.7722	3.9764	4.1048
ARMT1	0.1368	5.808	2.6023	0.026704	0.13188	-4.9606	5.7584	5.7566	5.8037	5.7314	5.8761	5.9218
ARNT	0.018041	5.9611	0.36366	0.7238	0.87068	-7.7373	5.9446	5.9322	6.0032	5.9647	5.943	5.9787
ARNTL	0.24223	3.0613	2.3276	0.04261	0.17631	-4.8497	2.9764	2.9648	3.1238	2.9318	3.2711	3.1001
ARNTL2	0.091498	5.0759	1.243	0.24265	0.50124	-6.8909	5.0777	5.1441	4.932	4.9636	5.2771	5.0609
ARPC1A	-0.085065	5.184	-1.452	0.17762	0.4214	-6.643	5.2828	5.2246	5.1004	5.1275	5.1439	5.2248
ARPC1B	-0.0093257	6.2651	-0.13093	0.89847	0.95733	-7.8467	6.3147	6.2712	6.2131	6.177	6.1862	6.4286
ARPC2	0.11984	6.8182	2.258	0.04793	0.19046	-5.6599	6.8052	6.7536	6.803	6.7601	6.9548	6.8327
ARPC3	0.11412	6.9274	2.2592	0.047833	0.19037	-5.6689	6.9127	6.8564	6.9306	6.8735	7.0412	6.9503
ARPC3P1	-0.36667	-1.7881	-0.91157	0.38378	0.63923	-5.3876	-1.5233	-1.8398	-1.8025	-1.7524	-2.1621	-1.6485
ARPC4	-0.0064635	6.3304	-0.10307	0.91997	0.96675	-7.8554	6.339	6.3356	6.259	6.3586	6.2617	6.4286
ARPC5	0.23292	6.5532	4.7267	0.00084395	0.011898	-1.4849	6.4742	6.4714	6.4817	6.4941	6.7468	6.6507
ARPC5L	0.11453	5.1613	1.9307	0.082808	0.26777	-5.9515	5.1494	5.1174	5.1199	5.1036	5.2908	5.1866
ARPIN	1.8736	-0.99784	4.1133	0.0021704	0.023579	-1.1175	-2.7277	-1.3328	-0.44887	-0.92525	-0.54435	-0.0080546
ARPP19	0.21179	6.9611	4.7631	0.00079926	0.01141	-1.4689	6.8688	6.8743	6.9579	6.9011	7.0877	7.0768
ARPP21	1.0232	2.2148	8.6029	6.882e-06	0.00036122	4.3112	1.6406	1.6334	2.2912	2.3622	2.6256	2.7357
ARRB1	-0.077634	4.77	-1.192	0.26122	0.52243	-6.8759	4.7569	4.8452	4.8236	4.7897	4.7427	4.6617
ARRB2	-0.51114	4.2189	-5.3224	0.00035502	0.0063896	-0.17646	4.4269	4.385	4.326	4.27	3.7849	4.1205
ARRDC1	-0.023117	3.5295	-0.21022	0.83778	0.92935	-7.2972	3.4639	3.5177	3.5809	3.573	3.3364	3.7049
ARRDC1-AS1	-0.13725	3.6868	-1.626	0.13549	0.35902	-6.0972	3.787	3.8356	3.5261	3.5776	3.6047	3.7895
ARRDC2	-0.35029	5.8124	-6.2099	0.0001072	0.0025585	0.81743	5.9431	5.9699	5.8501	5.8767	5.5562	5.6782
ARRDC3	-0.16305	5.1798	-2.616	0.02609	0.12985	-4.816	5.2018	5.1477	5.2971	5.4029	5.0247	5.0046
ARRDC3-AS1	-0.002953	1.1591	-0.016768	0.98696	0.99492	-6.6797	1.048	1.3635	1.02	1.1199	1.0621	1.3408
ARRDC4	-0.15311	4.4886	-2.3705	0.039618	0.16926	-5.1096	4.5709	4.5425	4.5067	4.4776	4.3835	4.4501
ARSA	-0.052791	3.4214	-0.40677	0.69288	0.85435	-7.2038	3.344	3.4378	3.51	3.4291	3.166	3.6412
ARSB	-0.07359	5.0963	-1.228	0.24799	0.50767	-6.9144	5.1857	5.2449	4.9764	4.8891	5.1204	5.1611
ARSD	0.90217	1.2937	4.7642	0.00079802	0.01141	-0.37127	0.68541	0.70668	1.8133	1.3967	1.6202	1.5401
ARSG	-0.011141	2.8205	-0.10104	0.92155	0.96747	-7.1462	2.9299	2.742	2.7024	2.7752	2.7921	2.9817
ARSK	0.2406	3.3427	2.163	0.056246	0.21061	-5.1879	3.3347	3.1144	3.444	3.1897	3.522	3.4514
ART4	-0.83138	2.1329	-6.7318	5.5666e-05	0.0016206	2.179	2.5864	2.6705	2.0829	1.9264	1.816	1.7152
ARV1	0.0054976	5.7868	0.10234	0.92054	0.96695	-7.7844	5.8414	5.7846	5.7597	5.6993	5.8439	5.792
ARVCF	-0.43729	4.8695	-4.7824	0.00077658	0.011185	-1.1372	5.0017	5.0965	4.9107	4.9131	4.4832	4.8119
ASAH1	0.056963	6.3858	1.1574	0.27443	0.53634	-7.1843	6.4547	6.3913	6.2769	6.2295	6.5007	6.4615
ASAH2	0.084012	-0.034355	0.34352	0.73843	0.87886	-6.2417	-0.15319	-0.157	-0.018234	0.061571	-0.22567	0.28639
ASAH2B	0.1355	1.7033	0.95354	0.36314	0.62225	-6.347	1.6527	1.5917	1.8477	1.6465	1.816	1.6649
ASAP1	-0.19927	5.9075	-3.4738	0.0061246	0.048155	-3.4707	6.0075	5.9679	5.9482	5.966	5.8451	5.7106
ASAP1-IT2	0.25055	-1.0246	0.71527	0.49106	0.72699	-5.7941	-0.68137	-1.5642	-1.1998	-1.4212	-0.83026	-0.45057
ASAP3	-1.1211	-3.3666	-1.5329	0.15679	0.39186	-4.4729	-3.5508	-2.1808	-3.098	-3.0062	-4.2127	-4.151
ASB1	-0.030922	4.881	-0.4784	0.64281	0.82731	-7.5164	4.953	4.9312	4.8419	4.7181	4.8924	4.9496
ASB12	-0.44281	-2.3469	-0.83735	0.42226	0.67205	-5.2961	-2.1219	-2.0003	-2.1651	-2.3143	-2.0659	-3.414
ASB13	0.32376	4.6187	5.1295	0.00046728	0.0077866	-0.56451	4.4652	4.4485	4.6318	4.584	4.7592	4.8234
ASB16-AS1	0.28287	2.0629	1.8928	0.088119	0.2778	-5.2718	1.7849	2.107	1.9544	2.078	2.0858	2.3673
ASB3	0.042771	1.1139	0.24565	0.811	0.91598	-6.5921	1.0931	0.80708	1.3068	1.3323	0.98554	1.1588
ASB6	-0.22387	4.9106	-2.4804	0.03287	0.15051	-5.0181	5.0129	5.0791	4.8546	4.8007	4.6963	5.0197
ASB7	-0.01766	4.5527	-0.24713	0.80989	0.91515	-7.5266	4.4729	4.6274	4.6031	4.5966	4.5273	4.4892
ASB8	-0.072915	4.9925	-1.1641	0.27183	0.53354	-6.963	5.0568	5.0841	4.9209	4.8732	4.9497	5.0706
ASB9	-0.18149	2.8354	-1.813	0.1004	0.30088	-5.5872	2.8638	2.9648	2.8959	2.8228	2.689	2.7758
ASCC1	0.048954	4.8419	0.82167	0.43072	0.67978	-7.2629	4.8192	4.7941	4.8798	4.8542	4.8766	4.8272
ASCC2	-0.14143	6.0171	-2.2794	0.04623	0.18659	-5.5259	6.0874	6.0931	6.0264	5.966	5.8783	6.0515
ASCC3	0.024593	8.2787	0.57029	0.58127	0.78962	-7.8851	8.353	8.2829	8.1784	8.1731	8.3749	8.3099
ASF1A	0.092555	6.5995	1.9241	0.083706	0.26954	-6.1674	6.5855	6.5792	6.5743	6.5169	6.7022	6.6388
ASF1B	0.1116	5.9686	1.8954	0.087758	0.27704	-6.1343	5.9072	5.9887	5.91	5.8753	6.0007	6.1294
ASGR1	-0.85692	-2.9949	-1.2584	0.23726	0.49514	-4.8169	-2.1219	-2.9178	-2.4699	-3.5367	-2.7722	-4.151
ASH1L	-0.0027326	5.9979	-0.052645	0.95907	0.98344	-7.8103	5.9843	5.9405	6.0451	6.0778	5.9347	6.0051
ASH1L-AS1	-0.1198	1.9551	-0.80833	0.438	0.68596	-6.5477	1.9212	2.026	1.9304	2.0382	1.7112	2.1032
ASH1L-IT1	0.71191	-2.5789	1.4294	0.18385	0.429	-4.7215	-3.1638	-2.6283	-2.4699	-2.7997	-2.3762	-2.0355
ASH2L	0.0037003	6.998	0.077051	0.94013	0.97425	-7.9301	6.9739	6.9741	7.0845	7.0086	7.0051	6.9415
ASIC3	-0.053978	-0.2425	-0.16149	0.87498	0.94587	-6.216	-0.051554	-0.80233	-0.25361	0.034853	-0.57714	0.19476
ASIC4	-1.6705	2.3088	-11.807	3.9371e-07	5.2485e-05	7.1266	2.986	3.1387	2.3704	2.5294	1.2883	1.5401
ASL	-0.10909	4.6498	-1.3814	0.1977	0.44568	-6.6329	4.7192	4.722	4.649	4.5276	4.5359	4.7448
ASLP1	-0.38523	-2.5507	-0.63304	0.54114	0.76303	-5.3465	-2.297	-2.9178	-2.4699	-1.5773	-2.6278	-3.414
ASNA1	-0.079445	7.128	-1.7854	0.10499	0.30902	-6.4344	7.191	7.2216	7.0572	7.0398	7.0986	7.1598
ASNS	-0.26313	6.2655	-5.4084	0.00031461	0.0058286	-0.39972	6.4321	6.4213	6.2388	6.1781	6.1779	6.1448
ASNSD1	0.045979	6.5737	0.95162	0.36407	0.62331	-7.4181	6.6235	6.5698	6.4947	6.4725	6.6739	6.608
ASPH	-0.057602	4.7225	-0.80439	0.44016	0.68765	-7.2418	4.7084	4.6862	4.8451	4.8618	4.7083	4.5249
ASPHD1	-0.87745	-2.874	-1.1743	0.26789	0.52981	-4.8665	-3.0033	-2.9178	-2.0338	-2.3143	-4.6982	-2.2765
ASPM	0.06892	8.2639	1.642	0.1321	0.35386	-6.7463	8.285	8.2154	8.2222	8.2205	8.3431	8.297
ASPRV1	0.1285	-0.25765	0.4326	0.67463	0.84459	-6.1112	-0.17441	-0.87828	0.12911	-0.16745	-0.33358	-0.12127
ASPSCR1	-0.19617	4.5648	-2.2609	0.047698	0.19007	-5.3037	4.5994	4.678	4.5505	4.6159	4.3358	4.6094
ASRGL1	0.08892	2.9654	0.92349	0.37784	0.6339	-6.763	3.0214	3.0747	2.6545	2.815	3.1586	3.0682
ASS1	0.40959	0.7455	2.0911	0.063452	0.2265	-4.5824	0.29567	0.70668	0.87724	0.91544	0.8441	0.83388
ASS1P1	0.010693	-2.8685	0.017108	0.98669	0.99492	-5.5359	-3.3443	-2.1808	-2.4699	-3.5367	-3.1132	-2.5661
ASS1P2	-0.63516	-1.9409	-1.3629	0.20328	0.45279	-4.9024	-1.8937	-1.3328	-2.3095	-1.5773	-2.4965	-2.0355
ASTE1	0.061564	3.6284	0.76363	0.463	0.70483	-7.0497	3.6714	3.5687	3.5287	3.6029	3.6899	3.709
ASTN2	0.13241	3.1856	1.1954	0.25994	0.52098	-6.5062	3.0583	3.1907	3.342	3.0632	3.2502	3.2095
ASUN	-0.091542	7.6199	-1.7933	0.10366	0.30732	-6.4667	7.6899	7.6528	7.6394	7.5898	7.639	7.5088
ASXL1	0.041997	6.3589	0.85757	0.41152	0.66342	-7.4737	6.3643	6.315	6.3266	6.382	6.3966	6.369
ASXL2	-0.0046036	6.4874	-0.042077	0.96728	0.98717	-7.8776	6.5512	6.4536	6.4495	6.5325	6.6874	6.2502
ASXL3	-1.5488	-2.3664	-1.8831	0.089546	0.2806	-4.1175	-2.0418	-2.0003	-1.0655	-0.97869	-2.3762	-5.736
ATAD1	0.10252	6.0635	1.8748	0.090769	0.2828	-6.1769	6.0748	6.0073	6.017	6.0035	6.1917	6.087
ATAD2	-0.080499	8.4622	-1.8001	0.10251	0.3049	-6.5315	8.5422	8.4747	8.4657	8.4377	8.4693	8.3837
ATAD2B	0.10701	5.9098	1.9862	0.075553	0.25249	-5.9817	5.8656	5.8639	5.8438	5.946	5.9808	5.9588
ATAD3A	-0.14078	6.5691	-1.6506	0.13032	0.3511	-6.5721	6.6636	6.7109	6.5142	6.3906	6.4144	6.7206
ATAD3B	-0.15026	6.433	-1.9633	0.078467	0.25859	-6.0881	6.5154	6.5631	6.3613	6.3403	6.2689	6.5491
ATAD5	-0.071247	6.5329	-1.5559	0.15128	0.38378	-6.6919	6.5714	6.5313	6.5617	6.5697	6.4883	6.475
ATAT1	0.039091	2.8543	0.36479	0.72299	0.87047	-7.0781	2.7614	2.9094	2.7891	2.9099	2.8017	2.954
ATE1	0.069262	5.8621	1.3126	0.2191	0.4719	-6.9273	5.8059	5.8963	5.8287	5.8167	5.9149	5.9101
ATE1-AS1	0.092938	-2.3479	0.1933	0.85065	0.93618	-5.6062	-2.4963	-2.3873	-1.9135	-2.4587	-2.2652	-2.5661
ATF1	0.014994	5.8797	0.29943	0.77084	0.89538	-7.7562	5.891	5.9322	5.8043	5.796	5.9064	5.9483
ATF2	0.47024	5.7372	8.3662	8.7865e-06	0.00042798	3.5091	5.465	5.4635	5.8618	5.7785	5.9652	5.8893
ATF3	0.25172	0.63115	1.1876	0.26286	0.52446	-5.775	0.31102	0.62651	0.89382	0.76099	0.78082	0.41377
ATF4	-0.064107	8.28	-1.5394	0.15522	0.38993	-6.8903	8.335	8.3265	8.24	8.2349	8.2309	8.3124
ATF4P3	-0.31114	-0.2066	-1.1337	0.28378	0.54542	-5.6347	-0.13229	0.14108	-0.62666	-0.077257	-0.48092	-0.06355
ATF4P4	-0.52461	-1.6434	-1.133	0.28406	0.54589	-5.182	-1.6966	-1.4439	-0.94268	-1.7524	-2.3762	-1.6485
ATF5	-0.001643	3.7925	-0.016319	0.98731	0.99492	-7.3996	3.7704	3.8296	3.743	3.727	3.6778	4.0072
ATF6	0.10907	6.683	2.2751	0.046569	0.18735	-5.6188	6.6744	6.6451	6.6455	6.5835	6.747	6.8025
ATF6B	-0.0054533	6.6577	-0.10573	0.91792	0.96595	-7.8917	6.6412	6.6544	6.6883	6.6615	6.5913	6.7098
ATF7	-0.010937	2.9017	-0.10659	0.91726	0.96556	-7.1524	2.9521	2.804	2.8668	2.9921	2.8762	2.9187
ATF7IP	0.13977	5.7361	2.3581	0.040458	0.17136	-5.3587	5.6893	5.6908	5.7369	5.6665	5.8817	5.7514
ATF7IP2	0.080454	5.5408	1.4458	0.17931	0.42337	-6.7082	5.4997	5.5201	5.4791	5.5569	5.5661	5.6232
ATG10	0.1702	2.62	1.649	0.13064	0.35148	-5.7655	2.4579	2.5525	2.6834	2.6836	2.6399	2.7028
ATG101	-0.14853	4.7455	-2.0387	0.069249	0.23952	-5.7093	4.8306	4.9101	4.7182	4.5631	4.6799	4.7708
ATG12	-0.044721	5.7745	-0.81752	0.43298	0.68131	-7.4274	5.8127	5.7745	5.8179	5.7531	5.7814	5.7075
ATG13	-0.13082	5.976	-2.6697	0.023808	0.12282	-4.8703	6.0843	6.0731	5.9074	5.9033	5.9688	5.9191
ATG14	-0.093614	5.4495	-1.6504	0.13037	0.3511	-6.399	5.4447	5.4146	5.5586	5.6173	5.365	5.2968
ATG16L1	-0.1069	5.2058	-1.8428	0.095633	0.29164	-6.0945	5.2623	5.3537	5.1295	5.1076	5.1964	5.1851
ATG16L2	0.085287	4.3523	1.026	0.32945	0.59017	-6.957	4.1756	4.2687	4.5067	4.5059	4.2165	4.4402
ATG2A	-0.1248	5.3525	-1.3196	0.21685	0.46914	-6.8293	5.326	5.4046	5.4037	5.4294	5.0966	5.4545
ATG2B	-0.20344	6.1892	-3.6068	0.0049169	0.041513	-3.2868	6.3199	6.275	6.1489	6.1716	6.0408	6.1788
ATG3	-0.028692	6.7297	-0.46455	0.65236	0.8318	-7.7946	6.8175	6.7763	6.6351	6.6373	6.8542	6.6582
ATG4A	-0.12057	4.6858	-1.9036	0.086574	0.27527	-5.9031	4.7853	4.7819	4.6404	4.608	4.6989	4.6005
ATG4B	-0.044487	5.9201	-0.81457	0.43458	0.68248	-7.4512	5.9176	5.9467	5.9262	5.9375	5.84	5.9527
ATG4C	0.063911	4.9362	0.88752	0.39597	0.64888	-7.2254	4.9026	4.9325	4.9676	4.9086	5.0504	4.8555
ATG4D	-0.28096	4.592	-4.2767	0.001679	0.019644	-1.9008	4.712	4.7236	4.5841	4.6316	4.3994	4.5012
ATG5	0.13476	6.265	2.7482	0.020825	0.11206	-4.7764	6.2683	6.2066	6.1994	6.1585	6.3673	6.3898
ATG7	-0.12291	4.7672	-1.9862	0.075544	0.25249	-5.7928	4.8764	4.8393	4.6696	4.7212	4.7142	4.7827
ATG9A	-0.25546	6.1388	-4.3903	0.0014076	0.017503	-1.9666	6.2463	6.2254	6.1553	6.2147	5.9233	6.0678
ATG9B	-0.05574	3.9905	-0.6462	0.53293	0.75838	-7.187	3.8722	3.8995	4.1883	4.2628	3.7539	3.9662
ATHL1	0.4266	2.5039	2.865	0.017068	0.098634	-3.7668	2.0953	2.1744	2.7395	2.7508	2.3957	2.8677
ATIC	0.11757	5.1131	0.45637	0.65803	0.83442	-7.5686	5.1679	5.1714	5.0742	4.9829	5.7317	4.5506
ATL1	0.06092	-2.0034	0.12916	0.89984	0.95776	-5.7066	-2.4963	-1.5642	-1.6994	-2.0628	-2.1621	-2.0355
ATL2	0.00047008	5.8173	0.0088691	0.9931	0.99752	-7.7957	5.8466	5.8705	5.7671	5.7215	5.8889	5.8095
ATL3	0.060107	7.3231	1.4515	0.17775	0.4215	-6.9215	7.3094	7.3326	7.2732	7.2652	7.3865	7.3714
ATM	-0.10591	8.8821	-2.7212	0.021805	0.1156	-5.0691	8.9491	8.8954	8.8967	8.9095	8.8009	8.8413
ATMIN	0.25543	6.0892	5.0943	0.00049164	0.0080711	-0.85951	6.0303	6.0093	6.0099	5.937	6.2881	6.2609
ATN1	-0.090773	2.9761	-0.82829	0.42713	0.67685	-6.8055	2.9398	3.0595	2.9681	3.1591	2.9385	2.7915
ATOH7	-0.55699	-2.9007	-0.82839	0.42708	0.67685	-5.2078	-2.4963	-2.6283	-2.0338	-3.8993	-2.9326	-3.414
ATOX1	0.084078	4.673	1.3681	0.2017	0.45109	-6.6618	4.688	4.6977	4.5879	4.5132	4.7764	4.7748
ATP10D	1.236	-0.68859	3.8623	0.0032422	0.03155	-1.4843	-1.4183	-1.3328	-0.82947	-0.43983	-0.30584	0.19476
ATP11A	-0.1195	5.8197	-1.1078	0.29426	0.55586	-7.1501	5.912	5.8404	5.8806	5.8516	5.9376	5.4958
ATP11B	0.16066	8.5621	3.7807	0.0037	0.034247	-3.2252	8.5076	8.4511	8.5614	8.5751	8.6768	8.6005
ATP11C	0.10367	6.2602	2.1523	0.057271	0.21274	-5.767	6.2168	6.2507	6.2093	6.2232	6.357	6.304
ATP13A1	-0.1032	6.9799	-1.528	0.15798	0.39351	-6.7839	7.0224	7.0764	6.9328	6.9297	6.8425	7.076
ATP13A2	0.07634	5.3415	0.91478	0.38217	0.63812	-7.2785	5.2882	5.3474	5.334	5.2399	5.2817	5.5581
ATP13A3	0.11933	8.2881	2.603	0.026673	0.13188	-5.227	8.2773	8.3115	8.1585	8.17	8.4626	8.3486
ATP13A4	0.15873	-2.8392	0.20652	0.84059	0.93061	-5.4762	-3.5508	-2.0003	-2.857	-2.3143	-2.1621	-4.151
ATP1A1	-0.14313	7.6211	-1.0899	0.30173	0.56318	-7.3811	7.7462	7.6941	7.6093	7.5861	7.8296	7.2614
ATP1A1-AS1	0.56967	0.40267	2.5665	0.028387	0.13741	-3.714	-0.2178	0.21604	0.7	0.7772	0.52681	0.41377
ATP1A3	0.73794	-1.3206	1.7495	0.11125	0.31901	-4.5806	-2.1219	-1.1335	-1.272	-1.5773	-1.2922	-0.52652
ATP1B1	0.63886	-1.5006	1.5584	0.15069	0.38279	-4.7839	-1.6966	-1.8398	-2.0338	-1.0919	-0.99772	-1.3437
ATP1B1P1	0.32298	-1.3341	0.89716	0.39105	0.64477	-5.5062	-1.3205	-1.8398	-1.1311	-1.2803	-1.0893	-1.3437
ATP1B2	-1.5869	0.39406	-5.9552	0.0001495	0.0032765	1.37	0.9237	1.0103	0.91021	0.53179	-0.83026	-0.18139
ATP1B3	0.05476	6.4748	1.0277	0.32867	0.59006	-7.3317	6.496	6.5021	6.4318	6.3232	6.5834	6.5122
ATP1B4	-1.6739	-2.6669	-2.337	0.041932	0.17485	-3.5757	-2.1219	-2.9178	-1.9135	-1.4212	-4.6982	-2.9286
ATP23	0.083517	4.6178	1.351	0.20694	0.45691	-6.6712	4.631	4.6427	4.5134	4.501	4.7444	4.6745
ATP2A1	0.010169	-0.27548	0.036017	0.97199	0.98923	-6.2119	-0.48304	-0.157	-0.36757	0.13888	-0.33358	-0.45057
ATP2A1-AS1	0.01103	0.80566	0.058066	0.95486	0.98135	-6.5703	0.78769	0.98908	0.77352	0.69427	0.98554	0.60387
ATP2A2	-0.08184	6.4984	-1.4361	0.18198	0.42681	-6.8524	6.5712	6.5572	6.4371	6.4831	6.548	6.3936
ATP2A3	0.8476	-0.47142	2.8867	0.01645	0.096224	-2.9992	-1.1427	-1.1335	0.10082	-0.19882	-0.39073	-0.06355
ATP2B1	0.14305	5.4411	2.2892	0.045471	0.18453	-5.431	5.4632	5.3432	5.3715	5.332	5.5198	5.6166
ATP2B2	-0.27449	-1.8068	-0.66114	0.5237	0.75194	-5.6345	-1.3686	-1.5642	-2.857	-1.7524	-1.8106	-1.488
ATP2B4	-0.33199	7.53	-7.7312	1.7393e-05	0.00070087	2.5796	7.7333	7.6874	7.5227	7.4752	7.3817	7.3796
ATP2C1	0.10227	7.2226	2.142	0.058263	0.21476	-5.886	7.2002	7.1066	7.2537	7.2596	7.2813	7.2343
ATP5A1	0.055528	10.405	1.6893	0.12253	0.3385	-6.8499	10.422	10.434	10.317	10.291	10.47	10.498
ATP5A1P2	-0.16985	-3.3021	-0.19267	0.85113	0.93628	-5.4638	-3.5508	-2.6283	-4.9724	-2.6192	-4.2127	-1.8291
ATP5A1P3	-0.61949	-0.75806	-1.4086	0.18976	0.43609	-5.0894	-0.071317	-1.4439	-0.32857	-0.40283	-1.0893	-1.2124
ATP5B	-0.024987	9.9329	-0.68173	0.51113	0.74306	-7.9438	9.9882	9.993	9.8616	9.818	9.9385	9.998
ATP5C1	-0.016592	7.8847	-0.36708	0.72133	0.86965	-7.9501	7.9433	7.8882	7.8354	7.8473	7.9406	7.8533
ATP5C1P1	0.31294	-1.7519	0.71665	0.49024	0.72633	-5.5922	-1.825	-1.8398	-1.6994	-2.4587	-1.8106	-0.87799
ATP5D	-0.014064	6.0374	-0.090547	0.92967	0.97094	-7.8191	5.9553	6.1129	6.0844	5.9375	5.7467	6.3878
ATP5E	-0.051822	7.6709	-1.2421	0.24299	0.50132	-7.2185	7.7282	7.7707	7.5634	7.5671	7.6767	7.7192
ATP5EP2	0.056158	-1.1703	0.13582	0.8947	0.95503	-5.9571	-0.77549	-1.6954	-1.513	-0.82397	-0.87034	-1.3437
ATP5F1	-0.051881	8.1907	-1.3056	0.22137	0.47447	-7.187	8.259	8.2469	8.1329	8.1077	8.2232	8.1746
ATP5F1P1	0.42976	-0.5746	1.0046	0.33913	0.5996	-5.5983	-0.77549	-0.80233	-0.29061	-0.23088	0.13979	-1.488
ATP5G1	-0.14663	6.695	-3.055	0.012362	0.078594	-4.2978	6.7885	6.8242	6.5817	6.6555	6.6434	6.6769
ATP5G2	-0.054819	7.5758	-1.1471	0.27844	0.53977	-7.3148	7.6064	7.6171	7.5728	7.5323	7.5077	7.6184
ATP5G3	-0.022069	7.7345	-0.50532	0.62445	0.81678	-7.8727	7.7876	7.7701	7.6603	7.6639	7.7205	7.8048
ATP5H	0.022538	6.8419	0.4666	0.65094	0.83144	-7.8021	6.8619	6.8227	6.8529	6.7879	6.8935	6.8322
ATP5HP4	0.6912	-2.356	1.1118	0.29265	0.55395	-5.1301	-1.9658	-3.2804	-3.75	-1.9517	-1.9757	-1.2124
ATP5I	-0.078198	6.7971	-1.4792	0.17036	0.41217	-6.8328	6.8785	6.884	6.6809	6.714	6.7447	6.8803
ATP5J	0.090804	6.9755	1.5847	0.14461	0.37354	-6.7073	6.9689	6.9718	6.9557	6.8534	7.1216	6.9815
ATP5J2	0.044532	5.8055	0.57329	0.57931	0.78809	-7.6156	5.8079	5.8507	5.7484	5.7402	5.9804	5.7054
ATP5L	-0.047911	6.9735	-0.90524	0.38696	0.64131	-7.5038	7.0796	6.9852	6.9093	6.9018	7.0356	6.9296
ATP5L2	-0.64854	-1.9294	-1.412	0.18877	0.43466	-4.8663	-1.8937	-1.0433	-1.9135	-2.3143	-2.3762	-2.0355
ATP5LP7	-0.32843	-1.9271	-0.65109	0.5299	0.75694	-5.5729	-1.9658	-1.4439	-2.6505	-1.6622	-2.4965	-1.3437
ATP5O	0.11159	5.6346	1.3547	0.2058	0.45576	-6.839	5.6547	5.4911	5.7444	5.5116	5.6849	5.7209
ATP5S	0.00072438	4.9072	0.010621	0.99174	0.99686	-7.6365	4.9414	4.8945	4.9005	4.903	4.9859	4.8177
ATP5SL	-0.22225	5.5506	-2.7444	0.02096	0.11252	-4.6778	5.6693	5.6642	5.4901	5.5237	5.3306	5.6254
ATP6AP1	0.050323	5.8884	0.49724	0.62994	0.82033	-7.6668	5.7944	5.9013	5.8623	5.9184	5.7329	6.1208
ATP6AP1L	-0.42243	-0.41853	-1.4092	0.18958	0.43575	-5.1685	-0.59301	-0.157	0.15685	-0.1067	-0.83026	-0.98109
ATP6AP2	0.029536	6.1075	0.60507	0.55882	0.77527	-7.6369	6.1239	6.1055	6.0562	6.0576	6.1215	6.1803
ATP6V0A1	-0.21959	5.7944	-4.3697	0.0014531	0.0179	-1.9542	5.8869	5.8878	5.8152	5.8333	5.6526	5.6908
ATP6V0A2	-0.034945	7.1015	-0.77235	0.45805	0.70131	-7.6311	7.124	7.1771	7.0639	7.0152	7.1015	7.1272
ATP6V0B	-0.14551	6.2053	-1.9248	0.083616	0.2694	-6.1232	6.2868	6.3963	6.0758	6.0518	6.0853	6.3358
ATP6V0C	0.51326	-2.1278	0.93918	0.37011	0.62795	-5.2927	-3.0033	-1.6954	-2.1651	-2.1831	-2.3762	-1.3437
ATP6V0D1	-0.20308	6.842	-2.8678	0.016988	0.098289	-4.6361	6.9501	7.0065	6.7834	6.732	6.6667	6.9131
ATP6V0E1	-0.043121	5.7324	-0.83118	0.42557	0.67524	-7.4174	5.8254	5.7761	5.6203	5.6567	5.7766	5.7393
ATP6V0E2	-0.17076	2.8481	-1.3621	0.20353	0.45306	-6.2045	2.8108	2.9207	2.9484	2.9173	2.5517	2.94
ATP6V0E2-AS1	0.040787	-1.3274	0.11358	0.91185	0.96371	-5.8912	-1.4183	-1.4439	-1.4281	-0.92525	-1.4054	-1.3437
ATP6V1A	0.071495	7.1264	1.4489	0.17846	0.42261	-6.9054	7.1202	7.1222	7.1083	7.0345	7.2328	7.1404
ATP6V1B2	0.0094354	7.3982	0.16193	0.87463	0.94575	-7.9639	7.4214	7.4192	7.343	7.3693	7.512	7.3246
ATP6V1C1	-0.018652	8.0963	-0.42851	0.67751	0.84605	-7.9465	8.1869	8.1623	7.9841	7.9396	8.1934	8.1118
ATP6V1D	0.060386	5.2806	0.92096	0.37909	0.63498	-7.2607	5.2711	5.2889	5.2806	5.2022	5.3986	5.242
ATP6V1E1	0.050789	6.1783	1.059	0.31488	0.57649	-7.2607	6.1636	6.2112	6.1214	6.1074	6.2425	6.2237
ATP6V1E2	0.07191	2.3743	0.63813	0.53795	0.76065	-6.8187	2.4052	2.3676	2.2467	2.2271	2.3999	2.5994
ATP6V1F	-0.12866	4.6884	-1.6697	0.12642	0.34492	-6.2463	4.775	4.7124	4.6708	4.6657	4.5417	4.7649
ATP6V1G1	-0.015341	6.0872	-0.26371	0.79745	0.90897	-7.7916	6.1215	6.1036	6.0726	6.0568	6.1618	6.0068
ATP6V1G2	1.4035	-2.1327	2.7676	0.020146	0.10984	-3.02	-2.4963	-3.2804	-2.4699	-1.6622	-1.2387	-1.6485
ATP6V1H	-0.03303	6.2186	-0.58122	0.57416	0.78452	-7.6607	6.2307	6.191	6.2781	6.2269	6.1257	6.2594
ATP7A	-0.026072	6.6472	-0.58609	0.57101	0.78274	-7.7088	6.6281	6.64	6.7087	6.6909	6.6041	6.6114
ATP7B	-0.17793	6.4355	-2.7558	0.020556	0.11111	-4.7726	6.4404	6.518	6.5075	6.5215	6.2152	6.4103
ATP8A1	0.21089	1.671	1.5031	0.16419	0.40327	-5.7087	1.4596	1.6738	1.7326	1.6553	1.7248	1.7797
ATP8B2	-0.53334	5.2942	-7.2724	2.925e-05	0.0010305	2.2913	5.4722	5.5311	5.4416	5.3429	4.8879	5.0898
ATP8B3	-0.25065	5.2575	-3.2102	0.0095141	0.065995	-3.8109	5.2308	5.3516	5.4542	5.395	4.9461	5.1672
ATP8B4	0.27873	1.2628	1.6305	0.13452	0.35711	-5.4219	1.0842	1.1507	1.0937	1.4683	1.3765	1.4036
ATP8B5P	0.087964	-2.9233	0.11597	0.91001	0.96267	-5.4908	-3.3443	-2.1808	-3.3875	-2.3143	-2.1621	-4.151
ATP9A	-0.074041	4.1884	-0.99356	0.34423	0.6044	-6.9469	4.1416	4.1447	4.3442	4.4026	4.1137	3.9834
ATP9B	0.10368	5.4634	1.875	0.09074	0.28279	-6.0822	5.3765	5.4393	5.4989	5.4649	5.5242	5.4765
ATPAF1	-0.02589	5.8242	-0.42345	0.68107	0.84808	-7.6961	5.8663	5.8588	5.826	5.7495	5.8971	5.7473
ATPAF2	-0.19186	4.2301	-2.6537	0.024464	0.125	-4.5811	4.3685	4.2884	4.1611	4.2556	4.1316	4.1754
ATPIF1	-0.11334	6.4724	-2.2794	0.046227	0.18659	-5.5829	6.4927	6.5783	6.4481	6.4831	6.4183	6.4141
ATR	-0.0057897	6.8206	-0.11188	0.91316	0.96399	-7.9177	6.9253	6.8666	6.6616	6.6984	6.9413	6.8303
ATRAID	0.03504	5.3756	0.61433	0.55293	0.77167	-7.5161	5.3874	5.3019	5.3943	5.3832	5.3698	5.4169
ATRIP	-0.022827	4.7834	-0.32808	0.74972	0.88476	-7.561	4.761	4.9284	4.71	4.6937	4.8013	4.8061
ATRN	0.010912	5.6726	0.21096	0.83722	0.92908	-7.7451	5.6491	5.6965	5.6717	5.6534	5.6688	5.696
ATRNL1	1.5969	-2.6839	1.9598	0.078924	0.25961	-4.0764	-3.5508	-3.2804	-1.513	-4.3847	-2.1621	-1.2124
ATRX	0.063328	6.9913	0.79135	0.44739	0.69286	-7.5988	6.9859	6.8986	7.0356	7.0467	7.1375	6.8436
ATXN10	0.036247	6.4748	0.78062	0.45339	0.69775	-7.5574	6.4969	6.5026	6.4107	6.374	6.5534	6.5111
ATXN1L	-0.066862	5.3732	-1.1955	0.2599	0.52098	-6.9861	5.4214	5.3773	5.3693	5.3805	5.3083	5.3823
ATXN2	-0.015131	5.3113	-0.24925	0.80829	0.91467	-7.6751	5.3549	5.2726	5.2672	5.3638	5.3128	5.2968
ATXN2-AS	0.16382	-1.0578	0.36687	0.72148	0.86972	-5.9004	-1.1015	-1.6954	-0.4913	-1.2148	-1.4655	-0.37842
ATXN2L	-0.042203	6.0787	-0.64801	0.5318	0.75764	-7.5966	6.0248	6.0993	6.1411	6.1434	5.9368	6.127
ATXN3	-0.099185	5.5155	-1.3971	0.19308	0.43996	-6.7643	5.6054	5.5466	5.5416	5.4829	5.5642	5.3522
ATXN7	0.02335	5.1789	0.33642	0.74362	0.88207	-7.6142	5.143	5.0803	5.2211	5.3685	5.1756	5.085
ATXN7L1	-0.10894	3.5599	-0.88654	0.39647	0.64919	-6.8924	3.584	3.5103	3.7544	3.7661	3.6011	3.1436
ATXN7L2	-0.33957	3.9683	-4.1616	0.0020112	0.022343	-1.9577	4.0701	4.1872	3.9691	3.9877	3.7222	3.8732
ATXN7L3	-0.062226	5.9436	-0.86881	0.40564	0.65818	-7.4113	5.9357	6.0425	5.912	5.8926	5.8307	6.0483
ATXN7L3B	0.0064455	6.4891	0.13266	0.89714	0.95652	-7.8739	6.5349	6.5021	6.3959	6.4363	6.4982	6.5669
AUH	-0.066373	3.9804	-0.9251	0.37703	0.63357	-6.9782	3.9878	3.9797	4.0304	4.0641	3.9363	3.8842
AUNIP	0.037251	4.909	0.6545	0.52778	0.75525	-7.4177	4.9543	4.9422	4.7797	4.7997	4.9803	4.9979
AUP1	-0.11095	7.2842	-1.7829	0.10542	0.30964	-6.4529	7.3633	7.3695	7.2302	7.2047	7.1629	7.3743
AURKA	-0.03011	6.6141	-0.65199	0.52934	0.75653	-7.6695	6.6642	6.6769	6.5624	6.5018	6.6387	6.641
AURKAIP1	-0.06245	6.0464	-0.87214	0.4039	0.65654	-7.423	6.0739	6.1122	6.0474	5.9482	5.9376	6.1592
AURKB	-0.037571	6.1585	-0.72522	0.4852	0.72248	-7.563	6.2342	6.2249	6.0032	6.0957	6.1745	6.2186
AURKC	-0.03808	3.995	-0.35068	0.73321	0.87535	-7.3966	3.9758	4.2443	3.7612	3.8316	3.9406	4.2168
AVEN	0.066468	4.393	1.0152	0.33433	0.59515	-6.9957	4.3713	4.3768	4.3562	4.3934	4.4632	4.3972
AVL9	0.095297	6.0589	1.7676	0.10806	0.31428	-6.3329	6.0553	5.959	6.04	6.0864	6.1263	6.0862
AVP	0.70367	-2.5134	1.1849	0.26388	0.52541	-4.8952	-3.5508	-3.2804	-1.6032	-1.4972	-3.1132	-2.0355
AVPI1	-0.52625	3.236	-4.985	0.00057612	0.0089838	-0.4724	3.3899	3.5214	3.2928	3.2976	2.8207	3.0937
AXDND1	0.10688	-2.8693	0.18713	0.85536	0.93818	-5.5405	-2.8589	-2.3873	-3.3875	-3.0062	-2.1621	-3.414
AXIN1	-0.082638	5.8403	-1.1048	0.29552	0.55685	-7.1595	5.8244	5.9048	5.8411	5.8711	5.6771	5.9236
AXL	-0.81705	5.9515	-11.783	4.0142e-07	5.279e-05	6.8134	6.1712	6.2322	6.293	6.2065	5.3033	5.503
AZGP1	-1.0981	-0.046173	-4.127	0.0021238	0.023187	-1.128	0.37083	0.42006	-0.018234	0.41233	-0.68023	-0.78178
AZI2	-0.0062894	5.3368	-0.11023	0.91444	0.96478	-7.7071	5.3614	5.3051	5.367	5.3105	5.3128	5.364
AZIN1	0.03504	8.8504	0.96177	0.35919	0.61835	-7.6215	8.8796	8.8604	8.7798	8.7733	8.9175	8.8916
AZIN1-AS1	-0.088721	0.43115	-0.38914	0.70546	0.86177	-6.3785	0.53668	0.54162	0.10082	0.6243	0.54216	0.2413
AZIN2	0.98029	-3.0537	1.374	0.19992	0.44874	-4.6672	-4.0813	-3.2804	-3.098	-1.9517	-2.4965	-3.414
AZU1	0.84783	-0.052609	2.6633	0.024069	0.12358	-3.4422	-1.1015	-0.157	0.23702	0.45326	-0.077569	0.33011
B2M	0.25535	7.9991	4.3215	0.001566	0.018812	-2.2767	7.8771	7.9017	7.9744	7.9772	8.2317	8.0325
B3GALNT1	-0.20771	3.6108	-2.4744	0.033205	0.15136	-4.7468	3.7551	3.7276	3.5472	3.5041	3.4808	3.6499
B3GALNT2	-0.019652	4.986	-0.33111	0.7475	0.88371	-7.5915	4.9761	5.0214	5.012	4.9503	4.9633	4.9928
B3GALNT2P1	2.465	-2.5088	4.7898	0.00076816	0.011173	-0.66114	-3.7918	-3.7658	-2.3095	-2.4587	-1.2387	-1.488
B3GALT4	0.11175	-1.0082	0.25118	0.80684	0.91384	-5.9479	-1.2739	-0.87828	-1.3479	-0.23088	-0.83026	-1.488
B3GALT6	0.032179	5.3484	0.36841	0.72036	0.86908	-7.6458	5.2672	5.4255	5.3333	5.2753	5.2587	5.5302
B3GAT3	-0.24833	4.1431	-2.821	0.018395	0.1035	-4.2825	4.2531	4.3269	4.0692	4.0624	3.9392	4.208
B3GLCT	-0.068599	4.0058	-0.91302	0.38305	0.63872	-7.0038	4.0091	4.1033	4.021	3.9755	4.0016	3.924
B3GNT2	-0.042704	5.456	-0.73822	0.47761	0.71672	-7.443	5.4594	5.5145	5.4921	5.3963	5.4468	5.427
B3GNT5	-0.24603	5.7866	-2.9695	0.014291	0.086983	-4.3331	6.0007	5.9827	5.6548	5.6529	5.8719	5.5569
B3GNT7	-0.30852	-2.2057	-0.47372	0.64603	0.82927	-5.4068	-2.7277	-2.3873	-0.7245	-0.97869	-2.2652	-4.151
B3GNT8	-1.8279	-2.4179	-2.0979	0.062732	0.22461	-3.8702	-1.8937	-1.2298	-2.0338	-1.3491	-2.2652	-5.736
B3GNT9	0.066384	2.1042	0.46693	0.65071	0.83144	-6.8157	1.8909	2.2566	2.1256	2.1791	2.07	2.1032
B3GNTL1	-0.15696	2.4392	-1.0875	0.30271	0.56389	-6.4245	2.3505	2.7099	2.417	2.4252	2.2255	2.5072
B4GALNT1	-0.516	-2.3101	-0.81476	0.43448	0.68238	-5.3196	-2.0418	-2.6283	-1.6032	-2.6192	-3.3196	-1.6485
B4GALNT4	-0.14815	-2.8324	-0.19965	0.84582	0.93336	-5.4875	-3.0033	-2.9178	-1.6994	-3.5367	-3.5607	-2.2765
B4GALT1	-0.0023718	4.0181	-0.030317	0.97642	0.99107	-7.4432	4.0622	3.9635	4.0472	4.0306	4.0707	3.9347
B4GALT2	-0.39525	5.7959	-5.7149	0.00020625	0.004208	0.11375	5.9532	6.0769	5.78	5.7089	5.5438	5.7127
B4GALT3	-0.12466	5.1404	-1.5657	0.14898	0.38002	-6.481	5.2095	5.2212	5.066	5.0995	4.9873	5.2591
B4GALT4	0.06636	2.7208	0.67309	0.51638	0.74622	-6.8876	2.7586	2.7292	2.6594	2.5437	2.8112	2.8224
B4GALT5	-0.14654	4.8094	-2.0334	0.069855	0.24061	-5.7202	4.8758	4.8686	4.8631	4.7523	4.6677	4.8291
B4GALT7	-0.20406	3.7228	-2.2243	0.050734	0.19789	-5.1863	3.8115	3.8995	3.6361	3.6299	3.5545	3.8051
B4GAT1	0.023247	3.4803	0.22127	0.8294	0.92546	-7.307	3.4274	3.6588	3.3837	3.2778	3.4627	3.6713
B9D1	-0.17007	3.915	-1.9017	0.086847	0.2759	-5.7275	3.889	4.1107	3.9553	3.9127	3.7751	3.8471
B9D2	0.1721	2.7988	1.7059	0.11933	0.33313	-5.734	2.6511	2.7164	2.9082	2.7992	2.8207	2.897
BAALC-AS1	-0.043007	0.27158	-0.17326	0.86596	0.9417	-6.3358	0.079691	0.17905	0.36147	0.85563	0.056732	0.096915
BAAT	0.38393	-2.1996	0.78364	0.4517	0.69652	-5.3725	-2.4963	-2.3873	-1.6032	-2.4587	-1.9757	-2.2765
BABAM1	0.032075	4.9873	0.46782	0.6501	0.83133	-7.5388	5.0176	4.9601	4.9209	4.9268	4.9618	5.1367
BACE1	0.24895	-2.4047	0.4608	0.65495	0.83323	-5.4515	-3.1638	-2.3873	-1.6032	-1.8486	-2.4965	-2.9286
BACE1-AS	0.11476	0.64565	0.61842	0.55034	0.76917	-6.3084	0.61296	0.48212	0.60248	0.7772	0.6594	0.73976
BACE2	0.7371	-3.1335	1.1304	0.28508	0.54679	-4.9449	-3.5508	-2.9178	-2.857	-3.8993	-2.1621	-3.414
BACH1	0.031712	6.8102	0.71015	0.49409	0.72935	-7.6441	6.803	6.7576	6.8388	6.8307	6.8087	6.8227
BACH1-IT1	0.20807	0.18382	0.83068	0.42584	0.67539	-5.9763	-0.091355	0.10209	0.51942	0.45326	0.36362	-0.24412
BACH1-IT2	0.05706	0.058069	0.22275	0.82829	0.92478	-6.2969	-0.11167	0.21604	-0.018234	0.32681	0.17959	-0.24412
BACH1-IT3	0.29428	-2.7052	0.48562	0.63787	0.82426	-5.4422	-3.3443	-2.1808	-3.098	-2.1831	-2.4965	-2.9286
BAD	-0.30313	3.8622	-2.2262	0.050569	0.19766	-5.2033	3.8514	4.1326	3.8866	3.8489	3.4907	3.9627
BAG1	-0.058744	6.5581	-1.3049	0.2216	0.47467	-7.0269	6.6074	6.6302	6.5089	6.4843	6.5563	6.5618
BAG2	-0.0026854	6.8615	-0.055172	0.9571	0.98243	-7.9246	6.9134	6.8951	6.7522	6.7891	6.8611	6.9577
BAG3	-0.39436	5.3516	-5.1861	0.00043088	0.0073811	-0.60848	5.5988	5.5611	5.2592	5.2494	5.0901	5.3508
BAG4	0.10465	6.3955	2.2054	0.052377	0.20162	-5.6948	6.3553	6.3262	6.4244	6.376	6.4573	6.4336
BAG5	0.046642	6.1276	0.85329	0.41378	0.6655	-7.4525	6.1586	6.1238	6.1122	5.9971	6.2059	6.1683
BAG6	-0.067789	8.1339	-0.90684	0.38615	0.64069	-7.6089	8.1438	8.1654	8.1522	8.1371	7.9572	8.2475
BAHD1	-0.11556	5.6415	-1.1788	0.26618	0.52787	-7.0522	5.6874	5.7208	5.5625	5.624	5.434	5.8201
BAIAP2	-0.77431	2.9279	-7.4197	2.4692e-05	0.00091291	2.9077	3.2536	3.1861	3.099	3.0466	2.3914	2.5905
BAIAP2-AS1	-0.76715	0.68913	-3.4902	0.00596	0.047365	-2.2713	1.0571	0.78263	0.79134	0.90072	0.035199	0.56781
BAIAP2L1	1.2902	-1.2365	3.6775	0.0043786	0.038413	-1.7348	-2.0418	-1.8398	-0.88497	-1.2803	-0.68023	-0.69158
BAIAP2L2	-0.58477	2.1848	-3.6756	0.0043921	0.038456	-2.3348	2.3505	2.5597	2.1115	2.233	1.6769	2.1769
BAIAP3	0.0087896	-0.025039	0.03096	0.97592	0.99097	-6.2316	-0.43105	-0.30638	0.51942	0.53179	-0.61069	0.14667
BAK1	0.17238	3.9593	2.472	0.033344	0.15178	-4.8394	3.9206	3.9305	3.8552	3.8451	4.0839	4.1205
BANF1	-0.14674	5.7854	-1.945	0.080871	0.26374	-6.0289	5.912	5.8906	5.7364	5.7162	5.862	5.5955
BANP	-0.064397	4.0261	-0.75446	0.46824	0.70879	-7.1389	3.9902	4.0759	4.1439	3.9895	3.9099	4.047
BAP1	-0.15042	7.2429	-2.5045	0.031546	0.1465	-5.2948	7.3473	7.3408	7.18	7.1754	7.1072	7.3065
BARD1	0.0087984	5.5013	0.14548	0.88727	0.95151	-7.7287	5.5196	5.4721	5.511	5.5177	5.5628	5.4245
BATF	1.6231	-3.0389	1.809	0.10105	0.30208	-4.1773	-3.1638	-6.0877	-1.6994	-2.3143	-2.9326	-2.0355
BAX	-0.055631	6.3568	-0.71735	0.48983	0.72603	-7.5912	6.4044	6.4074	6.2832	6.2974	6.2301	6.5182
BAZ1A	-0.010105	7.5628	-0.18954	0.85352	0.93743	-7.9782	7.6595	7.6093	7.4415	7.4306	7.6937	7.542
BAZ1B	0.059423	8.0441	1.4427	0.18017	0.42428	-7.0011	8.0799	8.0303	7.9838	7.9373	8.1203	8.1129
BAZ2A	-0.056221	5.6177	-1.0382	0.32401	0.58544	-7.1938	5.6381	5.6149	5.6426	5.6822	5.6008	5.5279
BAZ2B	0.38219	5.3319	6.1832	0.00011095	0.0026206	0.84896	5.0805	5.1537	5.4181	5.3818	5.5367	5.4207
BBC3	-0.33112	4.3862	-3.144	0.010636	0.071323	-3.7619	4.3749	4.6376	4.4972	4.44	4.0494	4.318
BBIP1	0.017712	3.6288	0.22885	0.82367	0.92253	-7.3236	3.6383	3.5935	3.6508	3.6074	3.6372	3.6456
BBOF1	0.40129	-0.40588	1.6334	0.13393	0.35638	-4.9585	-0.62187	-0.59588	-0.40765	-0.40283	-0.22567	-0.18139
BBS1	-0.25833	-0.29569	-0.85968	0.41042	0.66247	-5.8338	-0.24	0.06201	-0.32857	-0.13676	-0.14972	-0.98109
BBS10	-0.20306	3.4039	-2.206	0.05232	0.20147	-5.1205	3.4758	3.4495	3.4127	3.4943	3.2003	3.3907
BBS12	-0.17842	2.7861	-1.7866	0.10479	0.30887	-5.6098	2.8296	2.8752	2.7802	2.8877	2.6576	2.6861
BBS2	0.1035	4.6187	1.6074	0.13953	0.36563	-6.2975	4.4505	4.4831	4.8365	4.8311	4.5932	4.5179
BBS4	0.2031	4.5847	2.51	0.031252	0.14566	-4.8988	4.4729	4.5168	4.6478	4.5466	4.7715	4.5529
BBS5	-0.26507	0.81526	-1.3274	0.21434	0.46588	-5.6712	0.77668	1.0518	0.75549	1.0813	0.58725	0.63906
BBS7	0.044315	4.7997	0.62518	0.54607	0.76631	-7.4018	4.8098	4.7091	4.8964	4.7717	4.8422	4.7688
BBS9	0.34221	2.717	2.4931	0.032164	0.14859	-4.4679	2.5252	2.538	2.7578	2.8877	3.012	2.5814
BBX	0.20524	6.2467	4.3097	0.0015948	0.019067	-2.1144	6.1332	6.1055	6.2855	6.296	6.3101	6.3498
BCAP29	0.061112	5.8796	1.1397	0.28137	0.54246	-7.1319	5.8926	5.8522	5.8195	5.8568	5.9727	5.8838
BCAP31	0.062441	6.3536	1.2889	0.22689	0.48171	-7.0235	6.3296	6.3973	6.2602	6.2897	6.416	6.4286
BCAR1	-0.10566	5.9252	-1.0928	0.3005	0.56169	-7.18	5.8942	5.9481	6.0245	5.9862	5.6583	6.04
BCAR3	-0.85062	-0.87017	-2.7912	0.019354	0.1068	-3.1122	-0.43105	-0.53315	-0.88497	-0.92525	-1.4655	-0.98109
BCAS2	0.10384	5.7917	2.0288	0.070393	0.24164	-5.9034	5.8113	5.7542	5.7126	5.6956	5.9045	5.8718
BCAS3	0.070968	3.8197	0.80545	0.43958	0.6871	-7.0491	3.776	3.7749	3.7947	3.9363	3.907	3.7296
BCAS4	-0.075915	-3.1123	-0.11584	0.91011	0.96267	-5.4075	-3.0033	-3.7658	-2.1651	-3.0062	-3.3196	-3.414
BCAT1	0.11084	9.9474	2.3923	0.038179	0.16599	-5.7056	9.8819	9.8152	10.057	10.017	10.018	9.8949
BCAT2	-0.088178	5.9345	-1.3013	0.22277	0.47622	-6.9465	5.9681	5.9488	5.9432	5.9603	5.7838	6.0025
BCCIP	-0.11311	7.1315	-2.0311	0.070128	0.2412	-6.0616	7.268	7.2609	7.0211	6.9564	7.2194	7.0635
BCDIN3D	0.099569	2.6426	0.93401	0.37264	0.63025	-6.6417	2.6021	2.5953	2.62	2.5718	2.6363	2.8301
BCDIN3D-AS1	-0.27326	-2.476	-0.57071	0.58099	0.78941	-5.5242	-2.3932	-1.6954	-2.857	-3.2472	-2.6278	-2.0355
BCKDHA	-0.52486	-0.87327	-1.5344	0.15642	0.39141	-4.8849	-0.77549	-1.0433	-0.53502	-0.13676	-1.4054	-1.3437
BCKDHB	0.29393	6.1145	6.0523	0.00013156	0.002988	0.55593	5.9369	5.9238	6.2073	6.1747	6.2398	6.2047
BCKDK	-0.1207	5.4574	-1.503	0.16424	0.40327	-6.6068	5.4241	5.4778	5.5933	5.5351	5.2204	5.4934
BCL10	0.0254	4.6263	0.39536	0.70101	0.85912	-7.4894	4.5573	4.6118	4.6539	4.7212	4.5951	4.6183
BCL11A	-0.08385	4.923	-1.4207	0.18629	0.43196	-6.63	4.9616	4.9614	4.9128	4.9287	4.8522	4.9213
BCL2	0.41501	1.4113	2.8732	0.016831	0.097776	-3.4921	1.1282	1.2251	1.5141	1.4583	1.5835	1.5586
BCL2L1	-0.090653	6.4579	-1.5745	0.14692	0.3766	-6.6625	6.5029	6.5527	6.4283	6.372	6.3729	6.5188
BCL2L11	0.30217	5.8598	4.3235	0.001561	0.018799	-2.0378	5.6933	5.6558	5.9586	5.9334	6.0692	5.8485
BCL2L12	0.039108	5.3584	0.62114	0.54862	0.76767	-7.5088	5.2706	5.4156	5.3803	5.3564	5.3832	5.3442
BCL2L13	0.015759	6.1799	0.27633	0.78801	0.9034	-7.7988	6.1683	6.1652	6.2323	6.1296	6.1396	6.2445
BCL2L15	-0.68378	-1.2655	-2.0029	0.07349	0.24814	-4.2322	-0.98444	-0.80233	-1.513	-1.2148	-1.7347	-1.3437
BCL2L2	0.10911	3.9749	1.3527	0.20639	0.45628	-6.5196	3.9193	3.9416	4.0247	3.8642	4.0071	4.0922
BCL2L2-PABPN1	0.17135	-2.6736	0.2956	0.77368	0.89659	-5.522	-2.8589	-2.3873	-2.857	-2.4587	-2.0659	-3.414
BCL3	-0.31369	0.30637	-1.1883	0.26259	0.52411	-5.7262	0.31102	0.68045	0.23702	0.061571	-0.12527	0.67342
BCL6	-0.25463	-1.2817	-0.6126	0.55403	0.77224	-5.7016	-1.6966	-0.80233	-0.88497	-1.152	-1.8106	-1.3437
BCL6B	-0.95248	-0.70535	-2.7695	0.020083	0.10964	-3.1354	-0.35641	-0.20509	-0.58011	-0.26367	-0.99772	-1.8291
BCL7A	-0.094412	4.6011	-1.4405	0.18077	0.42509	-6.5543	4.7113	4.7026	4.4863	4.4463	4.571	4.6892
BCL7B	-0.030048	4.8959	-0.44254	0.66766	0.84033	-7.5345	4.9039	4.9831	4.8472	4.7947	4.8522	4.9945
BCL7C	-0.091384	5.5185	-1.5828	0.14504	0.37401	-6.5159	5.5543	5.5575	5.5812	5.478	5.4442	5.4958
BCL9	0.05488	2.8955	0.45444	0.65937	0.83503	-7.0388	2.8081	2.7795	2.9953	2.9569	2.7331	3.1001
BCL9L	-0.16844	1.6447	-0.83941	0.42116	0.67108	-6.4092	1.4596	1.726	1.8477	1.8287	1.1648	1.8415
BCLAF1	-0.026345	8.9736	-0.46531	0.65183	0.83172	-7.9994	9.061	8.9728	8.9251	8.9122	9.074	8.8963
BCLAF1P1	-0.23604	-0.41298	-0.83365	0.42425	0.67389	-5.8646	-0.012822	-0.59588	-0.62666	-0.51679	-0.54435	-0.18139
BCO2	0.93265	-2.4937	1.7496	0.11123	0.31901	-4.4162	-3.0033	-2.1808	-3.098	-3.5367	-2.1621	-0.98109
BCOR	-0.094503	5.7696	-1.3163	0.21791	0.47048	-6.891	5.7191	5.6998	5.9166	6.0023	5.5304	5.7494
BCORL1	0.36774	2.0908	2.8166	0.018533	0.10392	-3.7729	1.9558	1.801	2.1603	2.0179	2.2111	2.3985
BCR	0.090278	6.925	1.6365	0.13326	0.35515	-6.6244	6.8738	6.8506	6.9683	6.9288	6.889	7.0394
BCRP3	-0.17095	2.2958	-1.3134	0.21885	0.47154	-6.1094	2.3205	2.2742	2.3222	2.4955	2.0487	2.3139
BCS1L	-0.13512	5.3483	-2.3346	0.042107	0.17504	-5.34	5.4765	5.4587	5.2986	5.1946	5.3454	5.3159
BCYRN1	-0.60964	3.6527	-5.0345	0.00053605	0.0085701	-0.48817	3.8748	4.0734	3.8252	3.5472	3.4156	3.1799
BDH1	0.13635	5.8464	2.5345	0.029975	0.14161	-5.0811	5.7647	5.8419	5.7716	5.826	5.9171	5.9571
BDH2	0.48461	2.6358	4.1747	0.0019701	0.021996	-1.6354	2.3091	2.5811	2.5847	2.604	2.921	2.8148
BDNF-AS	0.72384	-1.5681	1.812	0.10056	0.30125	-4.4141	-2.1219	-2.0003	-1.1998	-1.5773	-1.5282	-0.98109
BDP1	0.082121	7.5779	1.1724	0.26863	0.53027	-7.287	7.609	7.4988	7.5313	7.5721	7.7432	7.513
BECN1	0.07998	6.1512	1.1958	0.25979	0.52091	-7.1054	6.1683	6.1042	6.1337	6.0949	6.3054	6.1005
BEGAIN	-0.63674	1.8489	-3.5148	0.0057231	0.046081	-2.4901	2.0411	1.9066	2.1044	2.091	1.1548	1.7954
BEND3	-0.09501	5.3334	-1.5849	0.14456	0.37346	-6.4914	5.3929	5.4625	5.2096	5.2603	5.288	5.3875
BEST1	-0.13896	-2.5133	-0.20246	0.84368	0.93244	-5.5242	-2.3932	-2.6283	-1.9135	-2.1831	-1.8106	-4.151
BEST2	-1.6818	-3.455	-1.9526	0.079869	0.26126	-4.014	-3.3443	-2.6283	-2.857	-1.9517	-4.2127	-5.736
BEST4	-0.14756	-1.6496	-0.29594	0.77343	0.89659	-5.7342	-1.4699	-2.3873	-1.0655	-1.4972	-2.2652	-1.2124
BET1	0.0041059	4.086	0.051993	0.95957	0.98355	-7.4628	4.12	4.0934	4.0341	4.0951	4.1765	3.997
BET1L	-0.063929	4.4945	-0.66941	0.51862	0.74716	-7.3146	4.5107	4.5187	4.4177	4.5264	4.3336	4.6596
BEX1	-0.93103	3.7079	-12.205	2.8962e-07	4.3246e-05	7.3959	4.262	4.3014	3.4884	3.482	3.3231	3.3907
BEX2	0.27097	-1.8125	0.49621	0.63064	0.82064	-5.515	-2.3932	-2.9178	-0.88497	-0.40283	-2.6278	-1.6485
BEX3	1.0801	1.5502	5.1188	0.00047458	0.0078608	0.11937	1.1624	0.42006	1.8979	1.9191	2.0753	1.8263
BEX4	0.11363	5.1663	1.4974	0.16564	0.40548	-6.5697	5.0772	5.0537	5.2431	5.2029	5.0914	5.3294
BFAR	0.062064	5.9612	1.2903	0.22643	0.48114	-6.9687	5.9614	5.9419	5.9135	5.9202	6.0159	6.0143
BFSP1	-0.14733	1.6251	-1.0335	0.32611	0.58789	-6.2104	1.5721	1.5917	1.8647	1.9191	1.4837	1.3193
BGLAP	1.344	-3.6848	1.3325	0.21273	0.4641	-4.6874	-5.6663	-2.1808	-3.098	-5.1217	-3.1132	-2.9286
BGLT3	-1.7556	-1.7774	-3.5992	0.0049784	0.041862	-1.8808	-0.80828	-1.5642	-1.513	-1.2803	-2.9326	-2.5661
BHLHB9	0.050235	1.6365	0.31339	0.76053	0.89047	-6.7452	1.6884	1.4897	1.822	1.5648	1.7514	1.5024
BHLHE40	-0.46033	4.0741	-5.1877	0.00042986	0.0073708	-0.28478	3.9181	3.9904	4.7251	4.7717	3.4114	3.6282
BICD1	0.016517	2.3789	0.12438	0.90352	0.9593	-7.0333	2.4405	2.538	2.061	2.346	2.5742	2.3139
BICD2	0.070872	5.633	1.3117	0.21938	0.47216	-6.8947	5.6388	5.5878	5.5958	5.5825	5.6596	5.7332
BICDL1	0.92012	-0.61924	2.7157	0.02201	0.11638	-3.2709	-1.1851	-0.87828	-0.4913	-0.47779	0.098858	-0.78178
BICDL2	0.39724	-2.7318	0.65871	0.52519	0.75306	-5.2286	-3.3443	-3.7658	-1.513	-1.4212	-2.9326	-3.414
BID	-0.22775	4.849	-3.8903	0.003099	0.030559	-2.5977	4.9952	4.9682	4.804	4.8037	4.7444	4.7787
BIK	0.1654	3.2668	1.5583	0.1507	0.38279	-6.0706	3.0651	3.3024	3.3298	3.2256	3.2618	3.4163
BIN1	-1.2019	-0.31062	-4.3282	0.0015496	0.018725	-0.81029	0.061657	0.10209	-0.049598	0.13888	-1.2387	-0.87799
BIN2	0.33812	4.8678	4.1533	0.0020375	0.022541	-2.1508	4.7004	4.5891	4.9578	5.0251	5.0789	4.8555
BIN3	-0.05799	5.2338	-1.0201	0.33212	0.59311	-7.1518	5.2789	5.2314	5.2455	5.2274	5.1774	5.242
BIRC2	0.061678	5.3607	1.1242	0.28759	0.54869	-7.064	5.3526	5.2976	5.3759	5.3625	5.4064	5.3693
BIRC3	-0.26781	1.4681	-1.4799	0.17019	0.41204	-5.6576	1.6825	1.2432	1.577	1.6985	1.2039	1.4036
BIRC5	-0.080497	6.9948	-1.6307	0.13449	0.35711	-6.6442	7.0445	7.0908	6.9483	6.9031	6.9434	7.0386
BIRC6	0.015603	8.3596	0.37151	0.71813	0.86804	-7.9897	8.3971	8.3406	8.3031	8.3479	8.4082	8.361
BIRC7	0.64005	-1.6217	1.1716	0.26892	0.53043	-5.0866	-3.0033	-1.5642	-1.0028	-0.43983	-1.8908	-1.8291
BISPR	0.14839	2.8722	1.4734	0.17189	0.41419	-6.0746	2.6986	2.8518	2.9204	2.9354	2.8732	2.954
BIVM	0.193	4.458	2.6462	0.024781	0.12589	-4.6431	4.3248	4.3727	4.4334	4.5034	4.4823	4.6314
BLCAP	0.16573	4.5578	1.7134	0.1179	0.33024	-6.1721	4.4392	4.6478	4.3785	4.4387	4.5849	4.8574
BLM	0.048029	6.4381	0.87022	0.4049	0.65753	-7.4766	6.5048	6.3963	6.3992	6.3256	6.5291	6.4738
BLMH	-0.058988	6.4808	-1.1107	0.29308	0.55447	-7.245	6.5865	6.5473	6.4013	6.3465	6.5575	6.4455
BLOC1S1	-0.065766	3.7428	-0.70641	0.49631	0.73063	-7.1147	3.787	3.7656	3.6063	3.8432	3.6847	3.7698
BLOC1S2	-0.16901	5.118	-2.1531	0.057192	0.21263	-5.5902	5.2293	5.2348	5.1811	4.9751	5.1172	4.9705
BLOC1S3	-0.19192	3.4555	-1.7406	0.11285	0.32163	-5.8601	3.5391	3.5028	3.4355	3.4621	3.2099	3.5837
BLOC1S4	-0.021406	3.4107	-0.19439	0.84982	0.93586	-7.2801	3.3328	3.514	3.4069	3.3581	3.2734	3.5792
BLOC1S5	0.1031	4.7273	1.5696	0.14807	0.3786	-6.3917	4.6732	4.6308	4.7561	4.7503	4.715	4.8386
BLOC1S6	0.1911	6.749	4.246	0.0017615	0.020372	-2.2817	6.6932	6.6497	6.6981	6.7245	6.8707	6.8581
BLVRA	-0.046287	6.5685	-0.90562	0.38677	0.64118	-7.454	6.5879	6.5783	6.6394	6.5373	6.5544	6.514
BLVRB	-0.78207	8.5254	-15.339	3.3873e-08	9.8798e-06	9.2354	8.8794	8.8997	8.6103	8.5338	8.0444	8.1847
BLZF1	0.032489	5.1648	0.57624	0.57739	0.78645	-7.5118	5.1679	5.2212	5.0733	5.0931	5.2376	5.1955
BMF	-1.0567	-0.6045	-3.1995	0.009687	0.066725	-2.4567	-0.33236	-0.73019	0.2881	0.16375	-1.5282	-1.488
BMI1	0.088948	5.1597	1.3856	0.19646	0.44418	-6.7245	5.1115	5.1632	5.1452	5.0661	5.1738	5.2981
BMP1	-0.0443	3.9266	-0.51969	0.61476	0.81027	-7.2793	3.8645	4.0734	3.9194	3.9035	3.8891	3.9097
BMP2	0.99504	-0.27652	3.7254	0.0040486	0.036325	-1.7337	-0.87619	-0.80233	0.071964	-0.36676	0.11947	0.19476
BMP2K	0.26997	8.143	6.7935	5.1629e-05	0.0015436	1.3566	8.01	7.9612	8.1829	8.1889	8.2635	8.2512
BMP8B	-0.29312	2.9363	-2.9423	0.014967	0.090058	-3.7718	3.056	3.0645	2.9914	2.9136	2.7095	2.8824
BMPR1A	0.11332	5.3181	1.9186	0.084468	0.27131	-5.997	5.2409	5.3485	5.264	5.2717	5.4158	5.368
BMPR2	0.21233	5.1954	3.3729	0.0072443	0.054378	-3.5354	5.09	5.0588	5.2854	5.1779	5.3223	5.2377
BMS1	-0.076486	6.9953	-1.2368	0.24484	0.50371	-7.1573	7.1247	7.0275	6.9562	6.8747	7.0736	6.9149
BMS1P1	0.76136	-1.7852	1.4273	0.18444	0.42963	-4.8328	-1.6966	-3.2804	-1.6994	-1.2803	-1.6625	-1.0921
BMS1P20	-0.16693	-2.3664	-0.33165	0.7471	0.88367	-5.5943	-2.4963	-1.8398	-2.857	-2.0628	-2.3762	-2.5661
BMS1P4	-0.087217	0.73023	-0.4028	0.6957	0.85587	-6.4356	0.56255	1.0103	0.94245	0.71124	0.70102	0.45385
BMS1P5	0.4225	-0.088554	1.3891	0.19542	0.443	-5.3935	-0.45681	0.32165	-0.081659	-0.55687	0.36362	-0.12127
BMS1P8	0.1972	-2.4365	0.39138	0.70385	0.8607	-5.5525	-2.8589	-2.0003	-2.3095	-2.6192	-2.2652	-2.5661
BMT2	0.72874	4.449	11.322	5.797e-07	6.8521e-05	6.5882	4.0417	4.0834	4.4959	4.5095	4.7965	4.7669
BMX	1.9912	-0.31917	6.4461	7.9343e-05	0.002077	1.8557	-1.4699	-1.3328	0.18407	-0.36676	0.61654	0.45385
BNIP1	-0.18353	3.5868	-1.9935	0.074643	0.25057	-5.5139	3.7022	3.7308	3.6238	3.4646	3.5882	3.4112
BNIP2	0.050548	7.1558	1.0887	0.30223	0.56349	-7.3399	7.1647	7.166	7.1069	7.0769	7.2544	7.1658
BNIP3	-0.84268	6.154	-16.715	1.497e-08	6.6353e-06	10.291	6.2435	6.2384	6.8267	6.8099	5.3848	5.4207
BNIP3L	0.02922	9.3981	0.7516	0.46988	0.71062	-7.8417	9.3132	9.3254	9.5648	9.4918	9.3599	9.3333
BNIP3P1	-0.2858	-1.2384	-0.64688	0.5325	0.75803	-5.64	-1.2289	-1.8398	-0.25361	-0.87372	-1.8908	-1.3437
BNIPL	-0.45226	-1.942	-0.93353	0.37288	0.63025	-5.3077	-1.5788	-2.0003	-1.3479	-2.1831	-1.9757	-2.5661
BOD1	0.096388	4.2806	1.0885	0.30232	0.56356	-6.8994	4.2748	4.2488	4.3562	4.0886	4.3706	4.3448
BOD1L1	0.011554	6.9716	0.15923	0.87671	0.94676	-7.9177	7.0051	6.9079	7.0004	7.0034	7.0803	6.8327
BOK	-0.44725	2.3586	-2.1488	0.057604	0.2134	-4.9211	2.3468	2.5525	2.5898	2.4201	1.6976	2.5448
BOLA1	0.058683	3.7101	0.6097	0.55587	0.77377	-7.1698	3.6669	3.6179	3.7498	3.7186	3.612	3.8952
BOLA2B	0.016845	-0.62978	0.060178	0.95322	0.98031	-6.0974	-0.62187	-0.87828	-0.44887	-0.40283	-0.64504	-0.78178
BOLA3	-0.2203	5.2057	-3.0473	0.012525	0.079252	-4.1068	5.3377	5.4344	5.0082	5.1688	5.1988	5.0866
BOLA3-AS1	-0.19191	2.9676	-1.965	0.078248	0.25811	-5.4102	3.0897	3.1242	2.8198	2.8914	2.8518	3.0289
BOP1	-0.34995	7.2261	-4.523	0.0011482	0.015058	-1.8801	7.4305	7.4494	7.1449	7.1141	6.9591	7.2586
BORA	0.062257	5.363	1.107	0.29459	0.55591	-7.0889	5.382	5.3453	5.3264	5.2817	5.4574	5.3849
BORCS5	-0.077331	3.378	-0.94769	0.36597	0.62469	-6.8237	3.4501	3.4339	3.2959	3.3473	3.3604	3.3804
BORCS6	-0.0086703	3.4627	-0.081969	0.93631	0.9733	-7.3	3.3422	3.5288	3.5783	3.452	3.3231	3.5517
BORCS7	0.016394	3.6485	0.16073	0.87555	0.94606	-7.3496	3.6307	3.6854	3.7292	3.4621	3.6138	3.7698
BORCS8	0.030157	3.3369	0.28661	0.78036	0.89918	-7.2255	3.3589	3.2632	3.3807	3.4084	3.4546	3.1558
bP-21264C1.1	0.71273	-0.94175	2.3917	0.038217	0.16607	-3.7245	-1.3686	-1.2298	-0.94268	-0.97869	-0.68023	-0.45057
bP-21264C1.2	0.029817	0.21054	0.12708	0.90143	0.95852	-6.3626	0.13248	0.25211	0.10082	0.49306	0.2928	-0.0080546
bP-2189O9.2	-0.20423	-1.8331	-0.52046	0.61425	0.80995	-5.6543	-1.5233	-1.8398	-1.9135	-1.9517	-1.7347	-2.0355
BPGM	-0.27652	4.0684	-3.4404	0.0064738	0.050035	-3.2047	4.3163	4.1988	3.9375	4.0102	4.0453	3.9025
BPHL	0.022963	3.3011	0.26846	0.79389	0.90682	-7.2293	3.2655	3.3364	3.2928	3.3088	3.3364	3.2668
BPNT1	0.16508	4.8407	2.4481	0.034723	0.15618	-5.0591	4.8085	4.7803	4.7985	4.7727	5.0212	4.863
BPTF	0.11333	6.8205	2.2719	0.046815	0.18792	-5.6351	6.7737	6.7572	6.8337	6.8149	6.9269	6.8169
BRAF	0.15704	5.2372	2.4958	0.03202	0.14822	-5.0439	5.1648	5.1235	5.1971	5.3306	5.3117	5.2954
BRAP	-0.032629	5.6634	-0.53618	0.60374	0.80416	-7.6158	5.7426	5.6899	5.6141	5.5889	5.7471	5.5977
BRAT1	-0.11549	5.8374	-1.0703	0.31002	0.57096	-7.2012	5.8562	5.9584	5.78	5.7759	5.61	6.0442
BRCA1	0.13654	7.1516	1.504	0.16396	0.40297	-6.8319	7.1381	7.0433	7.1865	7.1208	7.3825	7.0382
BRCA2	0.059539	6.9899	1.3454	0.20866	0.45922	-7.0208	6.9784	6.931	6.9923	7.0069	7.0278	7.0028
BRCC3	0.059542	4.9562	0.88076	0.39944	0.65231	-7.2413	4.9604	4.979	4.8954	4.8928	5.092	4.9178
BRD1	0.15429	5.5961	2.4105	0.037019	0.1627	-5.2491	5.5168	5.5145	5.5774	5.5906	5.5994	5.7782
BRD2	0.0076235	8.0138	0.18893	0.85399	0.93764	-8.0124	7.999	7.9848	8.049	8.0434	7.9771	8.0294
BRD3	0.29354	5.1139	3.2172	0.0094031	0.065379	-3.7957	5.058	4.9422	5.0968	5.0479	5.4236	5.115
BRD4	-0.031369	6.2919	-0.65967	0.5246	0.75258	-7.6193	6.3049	6.2925	6.3031	6.3228	6.2884	6.2395
BRD7	-0.0053811	6.5315	-0.10311	0.91995	0.96675	-7.8819	6.5849	6.5509	6.493	6.448	6.6112	6.5009
BRD7P2	0.75671	-1.3512	2.0231	0.071067	0.24325	-4.1573	-1.825	-2.0003	-0.88497	-1.2803	-1.2387	-0.87799
BRD8	0.1279	6.1294	2.5415	0.029623	0.14048	-5.1036	6.077	6.0425	6.1359	6.1531	6.22	6.1478
BRD9	-0.094421	5.7192	-1.8174	0.099671	0.29942	-6.21	5.7906	5.7448	5.7358	5.6897	5.6771	5.6771
BRE	-0.018599	4.3025	-0.28535	0.78129	0.89979	-7.4657	4.3124	4.297	4.3107	4.3123	4.2808	4.3016
BRF1	-0.021356	5.0388	-0.23575	0.81846	0.91966	-7.6326	5.0194	5.0664	5.0642	4.9698	4.8984	5.2146
BRF2	-0.086208	4.6656	-1.2025	0.2573	0.51824	-6.8523	4.6843	4.7865	4.6672	4.5549	4.6033	4.6976
BRI3	0.14419	3.5837	1.7318	0.11447	0.32458	-5.9111	3.5682	3.4991	3.5834	3.5138	3.7273	3.6105
BRI3BP	0.034018	6.5262	0.71229	0.49283	0.7284	-7.617	6.5582	6.5482	6.4669	6.4017	6.5699	6.6125
BRICD5	-0.23878	1.6041	-1.0574	0.31561	0.57714	-6.2121	1.4318	1.9291	1.6953	1.5926	1.1347	1.8415
BRIP1	0.21935	5.1151	3.3261	0.0078336	0.057331	-3.6022	4.9749	5.0227	5.0878	5.2037	5.2511	5.1505
BRIX1	-0.12547	6.5598	-2.3644	0.04003	0.17028	-5.4591	6.682	6.6848	6.4755	6.4199	6.6092	6.4871
BRK1	0.008796	6.308	0.1784	0.86202	0.94065	-7.8421	6.3374	6.3145	6.2863	6.2489	6.3656	6.295
BRMS1	-0.13011	5.4864	-1.9234	0.083802	0.26973	-6.0252	5.6517	5.5878	5.3049	5.3409	5.42	5.6133
BRMS1L	-0.27045	2.6087	-1.7058	0.11934	0.33313	-5.6912	2.6299	3.0544	2.451	2.6176	2.6075	2.2919
BROX	-0.070844	6.4816	-1.5268	0.15828	0.39403	-6.7295	6.5272	6.5473	6.4606	6.4309	6.4819	6.4418
BRPF1	-0.10979	5.4476	-1.3583	0.2047	0.45439	-6.8004	5.5324	5.4096	5.5258	5.4198	5.2834	5.5149
BRPF3	-0.157	4.2495	-1.7517	0.11086	0.31872	-6.0294	4.3105	4.2731	4.2475	4.2997	4.0399	4.3261
BRSK1	1.1628	-1.4876	2.6496	0.024636	0.12542	-3.2082	-2.4963	-2.3873	-1.0028	-0.72933	-1.5282	-0.78178
BRWD1	0.029643	7.6292	0.63593	0.53933	0.76184	-7.7782	7.6248	7.5569	7.6344	7.7134	7.6321	7.6137
BRWD1-IT1	-0.18344	-1.3777	-0.45919	0.65607	0.83368	-5.7728	-1.1427	-1.5642	-1.513	-0.92525	-1.2922	-1.8291
BRWD3	0.090194	5.9252	1.332	0.21288	0.46437	-6.906	5.9167	5.8014	5.9645	5.9858	6.0313	5.8513
BSCL2	0.30866	0.73858	1.4142	0.18815	0.43396	-5.5755	0.45613	0.73244	0.62252	0.69427	0.6734	1.2527
BSDC1	-0.28759	6.6878	-5.6996	0.00021059	0.0042622	-0.014975	6.8144	6.8163	6.7104	6.7122	6.4794	6.5941
BSG	-0.44743	9.101	-7.0991	3.5818e-05	0.001205	1.6736	9.2974	9.3361	9.1025	9.1091	8.7621	8.9988
BSN	0.39071	-0.88249	1.242	0.24303	0.50132	-5.3241	-1.1015	-0.87828	-1.272	-0.68425	-0.57714	-0.78178
BSPRY	0.053969	5.7124	0.92363	0.37776	0.6339	-7.3141	5.6027	5.6079	5.8796	5.8396	5.6077	5.7372
BST1	2.5713	-4.3726	2.0502	0.067929	0.23704	-3.9181	-7.2512	-3.7658	-4.9724	-4.3847	-4.2127	-1.6485
BST2	0.29902	6.3264	5.5185	0.0002699	0.0051622	-0.24528	6.1861	6.2072	6.3388	6.228	6.4674	6.5311
BTAF1	-0.014826	7.2963	-0.3346	0.74494	0.88299	-7.9036	7.3094	7.2664	7.2972	7.3518	7.2676	7.2855
BTBD1	0.058491	6.9961	1.3065	0.22107	0.47405	-7.0733	6.998	7.0035	6.9253	6.9405	7.0871	7.022
BTBD10	0.10462	4.975	1.8239	0.098628	0.29734	-6.0927	5.0316	5.0004	4.7583	4.8155	5.1293	5.115
BTBD10P2	0.090495	-0.19791	0.32694	0.75056	0.88486	-6.1987	-0.48304	-0.065369	-0.32857	0.034853	-0.39073	0.045385
BTBD19	-0.85668	0.22829	-3.1139	0.011192	0.073464	-2.7701	0.29567	0.73244	0.31297	0.69427	-0.54435	-0.12127
BTBD2	0.24862	5.4516	2.7618	0.020348	0.11048	-4.6188	5.1889	5.2868	5.6407	5.5715	5.3563	5.6654
BTBD3	-0.08548	4.4745	-1.2481	0.24086	0.49927	-6.7509	4.4771	4.5297	4.5492	4.4526	4.393	4.4452
BTBD6	0.12732	4.6856	1.4939	0.16655	0.40646	-6.4924	4.6791	4.5624	4.7424	4.5596	4.6997	4.8704
BTBD7	0.081364	5.5086	1.0323	0.32662	0.58845	-7.1917	5.5507	5.4683	5.4359	5.4574	5.7012	5.4383
BTBD8	0.13871	1.7278	0.97152	0.35455	0.61453	-6.3123	1.4665	1.6334	1.9934	1.897	1.6129	1.7639
BTBD9	0.27444	3.0388	2.5816	0.027663	0.13519	-4.3994	2.8323	2.7795	3.1756	3.1806	3.0037	3.2612
BTD	-0.0046054	3.7633	-0.057352	0.95541	0.98154	-7.3782	3.6949	3.8146	3.7702	3.8374	3.7373	3.7255
BTF3	-0.043247	8.8407	-0.84849	0.41632	0.66735	-7.7231	8.913	8.8508	8.8288	8.784	8.9059	8.7617
BTF3L4	-0.066492	5.8854	-1.2538	0.23889	0.49707	-7.0042	5.9263	6.008	5.8147	5.783	5.9112	5.869
BTF3L4P2	-0.3743	-1.7038	-0.86114	0.40965	0.66166	-5.4396	-1.4183	-1.6954	-1.1998	-2.0628	-1.8106	-2.0355
BTF3P10	0.49685	-2.3909	1.0554	0.31647	0.57821	-5.1283	-2.7277	-2.6283	-2.4699	-2.3143	-2.3762	-1.8291
BTF3P12	-1.5485	-4.1544	-1.2525	0.23934	0.49757	-4.6929	-4.0813	-2.9178	-4.9724	-3.8993	-7.0201	-2.0355
BTF3P13	1.5309	-3.2588	2.3735	0.039416	0.16876	-3.5311	-4.4439	-3.2804	-3.098	-3.5367	-2.2652	-2.9286
BTF3P2	0.34601	-2.2296	0.7634	0.46313	0.70483	-5.4744	-2.2068	-1.8398	-3.3875	-2.3143	-1.5938	-2.0355
BTF3P5	-0.60195	-2.6606	-1.0936	0.30017	0.56169	-5.0256	-2.1219	-2.6283	-2.857	-2.3143	-2.6278	-3.414
BTF3P6	-0.66128	-0.45009	-2.3383	0.04184	0.17457	-3.8914	-0.13229	-0.021648	-0.58011	-0.26367	-0.61069	-1.0921
BTF3P7	-0.7799	-3.9188	-0.72651	0.48444	0.72197	-5.0726	-4.4439	-2.0003	-3.3875	-4.3847	-3.5607	-5.736
BTG1	0.3239	4.5286	4.9864	0.000575	0.0089838	-0.75078	4.2816	4.2992	4.7147	4.6471	4.6061	4.6227
BTG2	-0.51463	4.2433	-5.5759	0.00024938	0.0048588	0.21313	4.3134	4.3809	4.4643	4.5666	3.7306	4.0038
BTG3	0.0013021	4.8106	0.02121	0.9835	0.9937	-7.6164	4.8239	4.771	4.8062	4.8359	4.782	4.8443
BTK	0.034292	7.1275	0.79463	0.44556	0.69182	-7.6171	7.1585	7.149	7.0634	7.0197	7.1989	7.1752
BTN2A1	0.35129	4.4517	4.8596	0.00069261	0.010277	-0.94666	4.2874	4.2797	4.4795	4.4361	4.6929	4.5343
BTN2A2	0.48875	3.9178	5.14	0.00046029	0.0077063	-0.38549	3.6624	3.5325	4.1053	4.0739	4.1912	3.9417
BTN2A3P	0.87777	2.0864	6.8828	4.6345e-05	0.0014391	2.3798	1.5911	1.6605	2.1326	2.2152	2.5517	2.3673
BTN3A1	0.58984	3.4993	7.1344	3.4358e-05	0.0011692	2.4277	3.2072	3.2138	3.5472	3.4393	3.8104	3.7778
BTN3A2	0.29844	5.4873	4.3557	0.0014849	0.018155	-1.9402	5.428	5.3062	5.4598	5.4088	5.7392	5.582
BTN3A3	1.0459	1.4455	5.956	0.00014933	0.0032765	1.2854	0.76558	0.96755	1.7326	1.3861	1.8223	1.9987
BTNL10	-0.86791	0.35455	-3.6059	0.0049238	0.041532	-2.0055	0.70878	0.80708	0.7	0.34867	0.01334	-0.45057
BTNL9	-0.13108	5.0499	-2.1119	0.061283	0.22161	-5.6303	5.0972	5.0136	5.1987	5.1338	4.9475	4.9088
BTRC	-0.34934	6.3797	-6.4442	7.9527e-05	0.002077	1.0651	6.5435	6.5194	6.4651	6.4037	6.2313	6.1154
BUB1	0.19508	7.9361	4.3002	0.0016185	0.019181	-2.3058	7.8776	7.8145	7.9594	7.8756	8.0424	8.0469
BUB1B	-0.016757	6.7392	-0.26881	0.79362	0.90676	-7.8725	6.8391	6.7378	6.6844	6.6431	6.8502	6.6806
BUB3	-0.022636	7.9809	-0.54422	0.5984	0.80082	-7.8714	8.0258	7.987	7.9628	7.9328	7.9635	8.0138
BUD13	-0.13852	5.2584	-2.4376	0.035353	0.15781	-5.1477	5.3283	5.3464	5.2366	5.2238	5.1645	5.2506
BUD31	-0.070837	6.0587	-1.2415	0.24318	0.50134	-7.0432	6.1485	6.1402	6.0302	5.8935	6.0919	6.0483
BX322557.10	0.32033	2.4441	2.7529	0.020657	0.11146	-3.9706	2.2184	2.3839	2.4677	2.4658	2.6506	2.4783
BX842568.2	-0.32853	-1.5495	-0.83928	0.42123	0.67108	-5.4876	-1.2289	-1.8398	-1.3479	-1.4212	-1.8106	-1.6485
BYSL	-0.27483	5.7875	-4.5369	0.0011241	0.014858	-1.6908	6.0221	5.9041	5.7369	5.654	5.6736	5.7342
BZW1	0.070263	7.6308	1.4942	0.16648	0.40646	-6.8969	7.646	7.6604	7.5721	7.4645	7.737	7.7045
BZW1P1	0.5205	-2.7061	0.87958	0.40005	0.65282	-5.2355	-3.3443	-2.0003	-3.098	-2.7997	-2.0659	-2.9286
BZW1P2	0.088297	0.46586	0.41373	0.68794	0.85188	-6.366	0.44226	0.25211	0.60248	0.41233	0.34624	0.73976
BZW2	-0.21723	6.8503	-3.277	0.0085041	0.060627	-3.9295	6.9436	6.9962	6.8595	6.7725	6.6617	6.8679
C10orf11	0.6284	1.1955	3.9136	0.0029848	0.029775	-1.689	0.74313	0.73244	1.5248	1.4071	1.3419	1.4239
C10orf128	-0.25192	-1.2209	-0.63244	0.54151	0.76305	-5.6839	-1.4699	-0.87828	-0.77603	-0.87372	-1.2922	-2.0355
C10orf2	-0.16006	5.7043	-1.8867	0.089008	0.27951	-6.1123	5.8676	5.8791	5.5933	5.5279	5.8373	5.5208
C10orf25	1.679	-2.9163	2.5211	0.030669	0.14355	-3.3442	-3.0033	-4.5028	-3.098	-2.7997	-1.5282	-2.5661
C10orf35	-0.091881	-0.20044	-0.38428	0.70894	0.86341	-6.1877	-0.2178	0.020787	-0.32857	-0.16745	-0.1999	-0.30971
C10orf54	-0.9139	-0.47039	-2.8077	0.018817	0.10495	-3.1258	0.061657	-0.59588	-0.18235	-0.13676	-1.1872	-0.78178
C10orf76	0.086222	5.1274	1.1811	0.26532	0.52709	-6.9637	5.1203	5.1101	5.086	5.0979	5.2874	5.0625
C10orf88	-0.10814	3.5705	-1.3091	0.22025	0.47305	-6.4795	3.6489	3.7115	3.4636	3.5138	3.6047	3.4808
C10orf95	-0.26084	-2.0618	-0.59539	0.56502	0.77923	-5.5643	-2.1219	-1.5642	-2.1651	-2.3143	-2.3762	-1.8291
C11orf1	-0.14546	3.2725	-1.3346	0.21204	0.46375	-6.3572	3.2694	3.4572	3.3748	3.2256	3.2595	3.0487
C11orf21	-0.56117	5.6481	-9.3666	3.2395e-06	0.00020968	4.6025	5.8659	5.8293	5.7699	5.8128	5.2376	5.3732
C11orf24	0.070507	5.2573	1.2095	0.25471	0.51575	-6.9579	5.2711	5.237	5.171	5.1848	5.2885	5.3914
C11orf31	-0.14857	5.3234	-1.9695	0.077661	0.25711	-5.9126	5.3471	5.4146	5.3393	5.3299	5.1338	5.3758
C11orf49	0.34199	5.0264	5.7883	0.00018678	0.0039099	0.34713	4.8186	4.7726	5.1599	5.1124	5.1281	5.1672
C11orf54	0.15348	4.3594	2.1754	0.055084	0.20824	-5.4101	4.351	4.2665	4.2556	4.3521	4.4912	4.4402
C11orf57	0.11566	6.095	2.097	0.062824	0.22484	-5.8334	6.0918	6.0093	6.1108	6.0177	6.1834	6.1569
C11orf58	0.05044	7.3034	0.94037	0.36953	0.62756	-7.505	7.3618	7.2752	7.2414	7.2107	7.4285	7.3031
C11orf63	0.2	-0.25106	0.80769	0.43835	0.68621	-5.9357	-0.35641	-0.20509	-0.21754	-0.59809	-0.17459	0.045385
C11orf65	-1.0282	-2.5112	-1.5323	0.15693	0.39196	-4.6122	-1.3686	-2.1808	-2.4699	-3.0062	-1.8908	-4.151
C11orf68	-0.11945	4.1641	-1.6087	0.13925	0.36533	-6.2074	4.1513	4.1896	4.2297	4.2828	4.0016	4.1298
C11orf71	-0.081935	2.457	-0.67848	0.5131	0.74415	-6.7858	2.5252	2.3839	2.615	2.4045	2.3744	2.439
C11orf74	-0.0091715	3.6582	-0.10858	0.91572	0.96545	-7.3537	3.6832	3.6821	3.6557	3.641	3.7356	3.5517
C11orf80	0.017593	0.89549	0.10299	0.92004	0.96675	-6.5856	0.84153	0.92349	0.82631	0.94444	0.83167	1.0055
C11orf84	0.44816	3.6529	4.824	0.00073006	0.010742	-0.83798	3.5028	3.3655	3.6654	3.5282	3.848	4.0072
C11orf94	-1.1741	-2.332	-2.4644	0.033778	0.15329	-3.4244	-1.8937	-1.8398	-2.0338	-2.1831	-3.1132	-2.9286
C11orf95	0.15526	2.841	1.4673	0.17352	0.41641	-6.0745	2.6602	2.804	2.9082	2.884	2.8081	2.9817
C11orf96	0.05175	0.945	0.29557	0.7737	0.89659	-6.4876	0.72032	0.62651	1.4142	1.4278	0.74147	0.73976
C12orf10	-0.25966	5.0252	-4.0226	0.0025069	0.026285	-2.4092	5.1648	5.1855	4.9578	4.9768	4.8568	5.0097
C12orf29	-0.086925	5.8619	-1.7238	0.11595	0.32688	-6.3766	5.9699	5.9556	5.7387	5.7648	5.9005	5.8419
C12orf4	-0.18249	5.5177	-3.5154	0.0057172	0.046054	-3.3559	5.6966	5.6558	5.3752	5.3871	5.5027	5.4886
C12orf43	-0.076654	4.5253	-1.2063	0.25589	0.51675	-6.8313	4.6485	4.6359	4.3622	4.3466	4.5359	4.6227
C12orf45	-0.28085	4.4192	-4.4101	0.0013653	0.017144	-1.6657	4.6241	4.6596	4.254	4.2757	4.3706	4.3315
C12orf49	-0.038155	4.8559	-0.64183	0.53564	0.75938	-7.4112	4.934	4.8816	4.8062	4.7625	4.8751	4.876
C12orf56	2.0787	-3.3324	2.621	0.025866	0.12911	-3.246	-4.9293	-3.7658	-2.3095	-3.8993	-2.1621	-2.9286
C12orf57	-0.046359	5.0884	-0.69067	0.50573	0.73817	-7.4059	5.0715	5.0396	5.1633	5.1871	4.9489	5.1197
C12orf60	-0.011632	1.4419	-0.08118	0.93693	0.9733	-6.7459	1.507	1.3799	1.437	1.4482	1.4758	1.4036
C12orf65	-0.032526	4.8437	-0.5371	0.60313	0.80368	-7.4713	4.8648	4.8945	4.8408	4.7686	4.836	4.8574
C12orf66	-0.28062	2.9351	-2.8814	0.016598	0.096773	-3.8844	3.0468	3.1907	2.8541	2.8914	2.8207	2.8071
C12orf73	0.050612	2.8962	0.52258	0.61283	0.80935	-7.0162	2.9324	2.8281	2.8793	2.8765	2.9785	2.8824
C12orf75	0.47631	5.5869	8.8505	5.3598e-06	0.00030854	4.0529	5.3326	5.3946	5.5857	5.5481	5.8489	5.8114
C12orf76	0.06924	1.848	0.44051	0.66909	0.84105	-6.7418	1.6766	1.726	2.0238	1.9764	1.6202	2.0649
C14orf1	-0.16612	5.1108	-1.89	0.088533	0.27856	-5.9889	5.0431	5.2325	5.1744	5.2501	4.8652	5.0993
C14orf119	-0.15976	6.8024	-3.4405	0.0064725	0.050035	-3.645	6.9166	6.9135	6.7683	6.7132	6.7783	6.7247
C14orf142	0.24084	3.6976	2.7043	0.022443	0.11803	-4.3718	3.5761	3.59	3.646	3.7842	3.88	3.709
C14orf159	0.0065434	5.6315	0.11982	0.90703	0.96099	-7.7515	5.5921	5.6226	5.7009	5.638	5.5879	5.6472
C14orf166	-0.082538	7.3864	-1.7371	0.11349	0.32274	-6.5305	7.4638	7.4706	7.3352	7.2931	7.4295	7.3262
C14orf169	-0.036623	5.3004	-0.65942	0.52475	0.75265	-7.4861	5.3586	5.4294	5.159	5.1463	5.3383	5.3706
C14orf2	-0.045943	6.5771	-1.0383	0.32395	0.58544	-7.3314	6.6414	6.64	6.4967	6.4938	6.5913	6.5997
C14orf28	0.2116	1.6411	1.5667	0.14873	0.37953	-5.6097	1.5136	1.5196	1.6858	1.7155	1.7646	1.6477
C14orf37	-0.47849	2.8954	-4.2317	0.0018013	0.020658	-1.5807	3.1507	3.0696	3.0628	2.8727	2.7095	2.5072
C14orf79	-0.068311	2.9833	-0.63596	0.53931	0.76184	-6.9479	3.0144	2.8222	3.162	3.0894	2.8301	2.9817
C14orf80	-0.30818	4.3153	-2.8742	0.016802	0.09764	-4.2207	4.4479	4.4329	4.3607	4.2599	3.9932	4.3972
C14orf93	-0.27245	3.8555	-3.4782	0.0060807	0.047894	-3.0834	4.0161	3.9716	3.9051	3.7802	3.7222	3.7377
C15orf39	-0.092511	4.721	-0.82674	0.42797	0.67748	-7.2392	4.6598	4.8788	4.6441	4.7379	4.5166	4.8888
C15orf40	-0.11291	3.8263	-1.2989	0.22358	0.47737	-6.542	3.8369	3.9553	3.8824	3.8042	3.8246	3.6542
C15orf41	-0.012023	3.4042	-0.10962	0.91491	0.96505	-7.2836	3.4622	3.3655	3.4012	3.477	3.5278	3.1918
C15orf52	-0.66778	-2.1938	-1.1932	0.26077	0.52222	-5.0233	-1.7594	-1.6954	-2.6505	-1.7524	-1.8908	-3.414
C15orf57	-0.21399	4.8231	-2.7723	0.019986	0.10937	-4.5022	4.9327	5.007	4.8018	4.7635	4.8305	4.6028
C15orf61	-0.11044	2.9899	-0.84987	0.41559	0.66685	-6.8027	3.0514	2.9374	3.0592	2.9426	2.7629	3.1859
C15orf62	-0.070136	-1.2154	-0.16714	0.87064	0.9439	-5.9108	-0.80828	-2.0003	-1.0655	-0.97869	-1.3477	-1.0921
C15orf65	0.31062	0.028574	1.3631	0.20322	0.45277	-5.422	-0.24	0.020787	-0.049598	0.16375	0.17959	0.096915
C16orf13	0.06983	5.4727	0.69583	0.50263	0.73595	-7.4633	5.2333	5.4577	5.6352	5.6496	5.2702	5.5899
C16orf45	1.2258	-1.7492	2.8932	0.01627	0.095451	-2.8612	-2.0418	-2.6283	-2.0338	-1.5773	-0.87034	-1.3437
C16orf46	-0.26223	-0.14715	-0.994	0.34403	0.60435	-5.803	-0.13229	0.25211	-0.36757	-0.33157	-0.45023	0.14667
C16orf52	-0.12586	3.2785	-1.4175	0.18719	0.433	-6.2457	3.3062	3.2981	3.3807	3.3769	3.2219	3.0874
C16orf54	-0.0033635	0.54406	-0.016701	0.98701	0.99492	-6.4341	0.26447	0.51218	0.87724	0.88584	0.31083	0.41377
C16orf58	-0.14524	5.7634	-1.8798	0.090023	0.2815	-6.119	5.7806	5.8315	5.8179	5.781	5.5505	5.8191
C16orf59	0.022198	4.395	0.21312	0.83558	0.9286	-7.517	4.3556	4.4582	4.281	4.3344	4.2831	4.6574
C16orf62	0.047772	6.3837	0.90687	0.38614	0.64069	-7.4306	6.335	6.3492	6.4268	6.3939	6.3409	6.456
C16orf70	-0.12663	4.3334	-1.7446	0.11213	0.32033	-6.067	4.3731	4.4906	4.3199	4.2293	4.2831	4.3043
C16orf71	0.19368	-0.99602	0.63227	0.54162	0.76305	-5.8719	-0.87619	-0.95845	-1.6994	-1.0342	-0.7163	-0.69158
C16orf72	0.18228	6.0363	3.4134	0.0067717	0.051774	-3.6019	6.0166	5.9203	5.9689	5.9858	6.1368	6.1892
C16orf74	1.269	-3.7531	1.5507	0.15251	0.38536	-4.3961	-5.6663	-4.5028	-2.1651	-2.1831	-3.8502	-4.151
C16orf86	0.21582	1.8483	1.1407	0.28098	0.54246	-6.1781	1.5529	1.6605	2.1396	1.9118	1.6129	2.2124
C16orf87	0.23063	3.5853	2.7026	0.022507	0.11813	-4.3516	3.4079	3.5723	3.5446	3.5937	3.6967	3.6966
C16orf91	-0.15519	4.1716	-1.7158	0.11744	0.32966	-6.0782	4.2942	4.2665	3.9866	4.1521	4.0453	4.285
C16orf95	-0.38277	1.0606	-2.0899	0.063575	0.22684	-4.6746	1.3072	1.0312	1.0937	1.1451	0.72811	1.0584
C17orf100	-0.43299	0.65201	-2.1035	0.062143	0.2236	-4.5292	0.84153	0.62651	0.87724	0.7446	0.21832	0.60387
C17orf107	-1.1113	-0.21061	-3.6436	0.0046287	0.039761	-1.8445	0.14965	0.388	0.31297	-0.23088	-0.79126	-1.0921
C17orf49	0.45369	-0.3577	1.745	0.11207	0.32022	-4.7979	-0.71207	-0.53315	-0.29061	-0.1067	-0.12527	-0.37842
C17orf51	-0.12491	1.6123	-0.75992	0.46511	0.70621	-6.5191	1.7739	1.687	1.2435	1.6198	1.5229	1.8263
C17orf53	-0.015577	4.362	-0.19909	0.84625	0.93366	-7.4907	4.2391	4.4031	4.5053	4.4323	4.2578	4.3341
C17orf58	0.073712	4.3671	0.98308	0.34911	0.60935	-7.0218	4.3529	4.2927	4.3975	4.3081	4.3522	4.4988
C17orf62	0.042253	5.1221	0.56105	0.58731	0.79364	-7.4982	5.0659	5.011	5.2071	5.2186	4.9999	5.2305
C17orf64	0.56713	-2.075	1.3286	0.21395	0.46539	-4.94	-2.3932	-2.0003	-2.3095	-2.1831	-1.5282	-2.0355
C17orf67	0.14232	0.97153	0.76459	0.46245	0.70452	-6.2788	0.8729	0.70668	1.3191	1.0007	0.95146	0.97827
C17orf75	-0.24674	2.9507	-2.4255	0.036087	0.15992	-4.6522	3.1635	2.9703	2.9563	2.9173	2.8518	2.8452
C17orf80	0.043894	4.8285	0.68647	0.50827	0.74072	-7.3763	4.8874	4.8094	4.7718	4.7233	4.933	4.8462
C17orf89	-0.11606	5.1314	-1.8917	0.088279	0.27803	-6.0076	5.21	5.2449	5.0532	5.0336	5.0604	5.1866
C17orf96	0.0090484	5.0438	0.13249	0.89727	0.95655	-7.6532	5.0017	5.0728	5.066	5.0055	4.9803	5.1367
C17orf97	-0.10013	1.9539	-0.63067	0.54262	0.76365	-6.7031	2.0038	2.0671	1.9544	1.69	1.784	2.224
C17orf99	-1.8079	-1.7308	-3.5945	0.0050177	0.042083	-1.8789	-1.2739	-0.41531	-1.6994	-1.4972	-2.9326	-2.5661
C18orf21	-0.070643	4.4421	-0.99521	0.34347	0.6039	-7.0249	4.5149	4.4793	4.4149	4.4272	4.4852	4.3315
C18orf25	-0.19712	6.2432	-3.7094	0.0041557	0.0371	-3.1111	6.3306	6.2557	6.3008	6.3757	6.1145	6.0822
C18orf32	-0.40622	0.81109	-2.2694	0.047019	0.18828	-4.3144	0.97278	0.92349	1.02	0.84028	0.54216	0.56781
C18orf54	0.091621	4.365	1.1015	0.2969	0.55825	-6.8948	4.3201	4.3312	4.422	4.3561	4.501	4.2598
C18orf65	0.49875	-1.5663	1.2677	0.23408	0.4908	-5.0857	-2.0418	-1.6954	-1.6994	-1.152	-1.4655	-1.3437
C18orf8	0.005379	5.2606	0.098057	0.92386	0.96814	-7.7105	5.3494	5.3443	5.1155	5.057	5.3655	5.3321
C19orf12	-0.004927	4.229	-0.053214	0.95863	0.98319	-7.4999	4.1566	4.3624	4.2182	4.1223	4.1592	4.3555
C19orf24	-0.20919	5.0098	-2.264	0.047449	0.18947	-5.3892	5.0614	5.1548	4.9852	4.9917	4.765	5.1009
C19orf25	-0.090812	5.5606	-1.0716	0.30947	0.57058	-7.1537	5.5846	5.5974	5.5838	5.5309	5.3779	5.6887
C19orf35	0.63634	-2.8568	0.88156	0.39903	0.65187	-5.1496	-3.5508	-3.2804	-1.9135	-3.2472	-3.3196	-1.8291
C19orf38	-0.048402	-1.2279	-0.099899	0.92243	0.9679	-5.8381	-1.8937	-1.4439	-0.58011	-0.40283	-2.2652	-0.78178
C19orf43	0.092198	7.0117	1.8879	0.088839	0.27918	-6.2621	6.8911	6.9949	7.0535	7.0693	7.0205	7.0407
C19orf44	-0.053481	3.3478	-0.60047	0.56177	0.77686	-7.0812	3.3935	3.3067	3.4468	3.3254	3.3142	3.3002
C19orf47	-0.10937	4.5268	-1.2217	0.25028	0.51047	-6.8037	4.533	4.6912	4.399	4.5022	4.3994	4.6358
C19orf48	-0.094335	7.7756	-1.571	0.14775	0.37822	-6.8021	7.8208	7.8571	7.7261	7.7403	7.6533	7.8559
C19orf52	0.044265	5.0915	0.52431	0.61167	0.80901	-7.5211	5.0188	5.0841	5.1547	5.0479	4.9887	5.2548
C19orf53	-0.27825	6.5026	-5.7002	0.00021042	0.0042622	0.0019187	6.6716	6.6623	6.4236	6.4666	6.3567	6.4349
C19orf54	-0.18081	2.8892	-1.4806	0.16998	0.41189	-6.046	2.8216	3.0286	3.1274	3.0298	2.8017	2.5261
C19orf57	-0.36381	4.0346	-4.4829	0.0012208	0.015863	-1.4296	4.1661	4.0934	4.27	4.1676	3.8183	3.6924
C19orf60	-0.16782	5.2867	-1.4868	0.16839	0.40932	-6.6058	5.2484	5.4314	5.3325	5.2958	4.9936	5.4182
C19orf66	-0.12218	4.4907	-1.4875	0.16819	0.40919	-6.4389	4.4557	4.4659	4.5841	4.7012	4.2624	4.4747
C19orf68	0.19628	1.6317	1.187	0.2631	0.52465	-6.0715	1.3745	1.6738	1.7234	1.7972	1.7776	1.4439
C19orf70	-0.19676	5.7694	-2.2196	0.051137	0.1987	-5.5889	5.875	5.8595	5.7933	5.6779	5.5443	5.8663
C19orf71	1.4923	-1.7097	3.029	0.012919	0.080968	-2.6574	-2.8589	-2.9178	-0.88497	-1.152	-1.6625	-0.78178
C19orf73	0.1505	0.023299	0.6294	0.54342	0.76427	-6.0993	-0.051554	-0.20509	0.012463	0.34867	0.098858	-0.06355
C19orf81	-0.18171	0.90232	-0.83119	0.42557	0.67524	-6.1815	0.61296	1.0518	1.15	1.2877	0.44752	0.86394
C1D	-0.0096094	4.682	-0.14496	0.88767	0.95168	-7.5887	4.7142	4.7664	4.579	4.617	4.769	4.6466
C1GALT1	-0.093174	5.2286	-1.5509	0.15245	0.3853	-6.5166	5.3503	5.2527	5.1937	5.1525	5.2388	5.1836
C1GALT1C1	0.022476	4.3415	0.31768	0.75736	0.88869	-7.4754	4.4039	4.3458	4.3107	4.1859	4.413	4.3894
C1orf101	-0.89665	-1.4752	-2.1205	0.060406	0.21977	-3.9828	-1.1851	-0.95845	-1.4281	-0.97869	-1.7347	-2.5661
C1orf109	-0.29933	4.8345	-3.8503	0.0033058	0.031872	-2.6667	5.05	4.979	4.7718	4.6991	4.6404	4.8667
C1orf112	-0.040519	5.6776	-0.74051	0.47628	0.71551	-7.4799	5.6944	5.7519	5.6241	5.6218	5.6441	5.7291
C1orf116	-0.39479	1.0222	-2.2928	0.04519	0.18381	-4.3254	1.1282	1.1697	1.0937	1.2877	0.78082	0.67342
C1orf122	-0.064672	3.7036	-0.3714	0.71821	0.86806	-7.3012	3.6153	3.8146	3.7106	3.6051	3.3776	4.0985
C1orf123	-0.12956	4.4683	-1.844	0.095447	0.29147	-5.9427	4.5852	4.4774	4.504	4.4272	4.4316	4.3843
C1orf131	-0.011438	4.8823	-0.15166	0.88252	0.94989	-7.6252	5.0094	4.8319	4.8095	4.8204	4.9782	4.8443
C1orf132	-0.33031	4.8225	-3.0279	0.012943	0.081043	-4.0253	4.8165	4.9017	5.0742	5.2193	4.6607	4.2626
C1orf145	0.68861	-1.2197	1.8995	0.087167	0.2763	-4.3435	-1.8937	-1.5642	-0.62666	-0.97869	-1.0428	-1.2124
C1orf159	0.014718	4.1724	0.13632	0.89432	0.95473	-7.4646	3.9937	4.2775	4.3014	4.1691	4.0359	4.257
C1orf162	0.05069	-2.1612	0.10711	0.91686	0.96545	-5.68	-2.2068	-2.3873	-1.9135	-2.3143	-2.4965	-1.6485
C1orf167	1.85	0.035264	6.1495	0.0001159	0.0027109	1.5772	-1.0614	-1.1335	0.12911	0.58801	0.63097	1.0584
C1orf174	-0.15336	5.6805	-2.8704	0.016911	0.098048	-4.4872	5.8437	5.7776	5.5677	5.5802	5.6849	5.6287
C1orf186	0.32176	6.825	6.7576	5.3941e-05	0.001586	1.432	6.5959	6.6476	6.9328	6.902	6.9676	6.904
C1orf198	-0.035982	6.0317	-0.49837	0.62917	0.81983	-7.6846	5.9867	6.08	6.0469	6.0527	5.8967	6.127
C1orf21	3.6539	-1.7446	7.5576	2.1115e-05	0.00081442	1.8593	-4.0813	-2.9178	-1.6994	-1.7524	-0.0088559	-0.0080546
C1orf216	0.00046881	4.3703	0.0069897	0.99456	0.99798	-7.5381	4.4348	4.391	4.254	4.2771	4.3856	4.4796
C1orf220	0.55683	-0.55715	2.0321	0.070013	0.24099	-4.3456	-0.98444	-0.73019	-0.62666	-0.36676	-0.39073	-0.24412
C1orf228	0.46841	-2.1182	0.78371	0.45165	0.69651	-5.2978	-2.7277	-3.2804	-1.0655	-1.2148	-2.9326	-1.488
C1orf27	0.14291	4.9101	1.8119	0.10057	0.30125	-6.0828	4.9315	4.7695	4.9087	4.876	5.0809	4.8943
C1orf35	0.085441	4.2912	1.1569	0.27461	0.53642	-6.8174	4.1933	4.2775	4.3741	4.2628	4.2865	4.3528
C1orf43	-0.067873	7.0323	-1.307	0.22093	0.47388	-7.0736	7.0415	7.1084	7.0732	6.9608	6.9932	7.0166
C1orf50	0.32843	-0.8275	1.0774	0.30698	0.56819	-5.5317	-1.1427	-0.59588	-1.0028	-1.0919	-0.7533	-0.37842
C1orf52	0.0054687	4.1294	0.07599	0.94095	0.97465	-7.4761	4.1576	4.1351	4.0582	4.0788	4.1124	4.2341
C1orf53	0.38169	0.59905	1.8813	0.089799	0.28102	-4.8926	0.29567	0.68045	0.38512	0.64211	0.81912	0.77182
C1orf54	0.53282	-1.487	1.3465	0.20834	0.45881	-4.9819	-1.7594	-2.1808	-0.94268	-1.152	-1.2387	-1.6485
C1orf56	-0.18295	1.0799	-0.85431	0.41324	0.66511	-6.2578	1.0752	1.1119	1.1079	1.1072	0.6734	1.4036
C1orf74	0.012249	3.8161	0.13243	0.89731	0.95655	-7.3955	3.9231	3.7018	3.7176	3.8081	3.8183	3.9276
C1QBP	0.026477	8.3238	0.60833	0.55675	0.77433	-7.8631	8.3278	8.3524	8.3137	8.2212	8.3773	8.3504
C1QTNF3	0.14861	-0.52196	0.52539	0.61094	0.80864	-6.0182	-0.80828	-0.35982	-0.36757	-0.64052	-0.57714	-0.37842
C1QTNF6	0.17478	1.7265	1.0277	0.32866	0.59006	-6.2641	1.4596	1.7388	1.7234	2.0516	1.7905	1.5949
C1QTNF9B-AS1	0.23135	1.7013	1.6402	0.13248	0.3543	-5.5442	1.7403	1.4745	1.6569	1.5926	1.9018	1.8415
C1RL	-0.0080116	3.2486	-0.090155	0.92997	0.97109	-7.2289	3.1443	3.2229	3.4242	3.3954	3.1857	3.1189
C1RL-AS1	0.16829	3.8204	1.6474	0.13099	0.35187	-6.0657	3.6669	3.7018	3.9982	3.9667	3.9608	3.6282
C1S	-1.7422	-3.7356	-1.7888	0.10441	0.30809	-4.1842	-3.7918	-2.1808	-4.2355	-2.6192	-5.4351	-4.151
C2	0.14155	-1.5831	0.34616	0.73651	0.87757	-5.7815	-1.6966	-1.8398	-1.513	-1.5773	-1.8908	-0.98109
C20orf194	0.33817	3.3978	3.2019	0.0096483	0.066562	-3.4266	3.2174	3.0024	3.6917	3.5016	3.4688	3.5048
C20orf196	0.18785	2.1198	1.2427	0.24276	0.50129	-6.1673	2.0639	2.107	2.1603	2.0179	2.4125	1.9575
C20orf24	0.64846	2.7429	6.0556	0.00013099	0.0029813	1.1991	2.2664	2.3003	3.0144	2.9676	2.8732	3.0355
C20orf27	-0.34837	6.5757	-3.3417	0.0076322	0.056441	-3.7906	6.7195	6.8509	6.4606	6.4978	6.2556	6.6694
C20orf96	0.12025	1.6663	0.80713	0.43866	0.6865	-6.4491	1.5721	1.5196	1.769	1.8896	1.7646	1.4832
C21orf2	-0.035434	3.2206	-0.24964	0.808	0.91442	-7.2115	3.0808	3.3364	3.2256	3.249	2.9757	3.4563
C21orf33	-0.50783	-1.7079	-1.2695	0.23346	0.49003	-5.027	-1.6365	-1.5642	-1.272	-1.5773	-2.1621	-2.0355
C21orf58	-0.062469	4.7003	-0.86579	0.40721	0.65956	-7.1798	4.6001	4.6829	4.9449	4.8165	4.5455	4.6116
C21orf59	0.1124	4.3687	1.2465	0.24144	0.49993	-6.7443	4.3454	4.3185	4.2983	4.2685	4.3413	4.6402
C21orf62-AS1	-0.063473	-0.59924	-0.16904	0.86919	0.94316	-6.0561	-0.84184	-0.41531	-0.40765	0.0076318	-0.45023	-1.488
C21orf91	0.29092	4.6415	4.3584	0.0014788	0.018105	-1.7912	4.4991	4.5944	4.5334	4.5909	4.8545	4.7768
C21orf91-OT1	0.6527	-2.8868	1.1652	0.2714	0.53313	-4.9516	-2.8589	-3.2804	-3.3875	-2.7997	-2.0659	-2.9286
C22orf23	0.26865	-2.4493	0.50862	0.62222	0.81503	-5.5192	-2.2068	-2.6283	-2.6505	-2.6192	-1.6625	-2.9286
C22orf29	-0.018596	4.7858	-0.29437	0.77459	0.89714	-7.5742	4.853	4.8214	4.7458	4.6427	4.8116	4.8405
C22orf31	1.1353	-2.6792	2.0136	0.072194	0.24545	-3.9927	-3.7918	-2.9178	-2.6505	-2.1831	-2.4965	-2.0355
C22orf34	-0.21233	3.918	-2.1495	0.057539	0.2134	-5.3502	3.9417	4.1919	3.9072	3.7842	3.7768	3.9061
C22orf39	-0.025995	3.9313	-0.34468	0.73759	0.87809	-7.3643	3.9552	3.9553	3.8467	3.9543	3.9099	3.9662
C22orf46	0.12917	4.3599	1.3588	0.20453	0.4543	-6.5852	4.2923	4.2465	4.4629	4.445	4.5196	4.1933
C2CD2	0.00098188	4.4476	0.012764	0.99007	0.99603	-7.5389	4.4243	4.4051	4.5596	4.4194	4.3685	4.5084
C2CD2L	-0.21021	3.9187	-2.3667	0.039874	0.16985	-4.9843	3.989	3.977	3.9924	3.9255	3.6899	3.9382
C2CD3	-0.030623	4.9127	-0.44405	0.66661	0.83978	-7.5298	4.942	4.9325	4.8536	4.968	4.9568	4.8234
C2CD4B	0.53264	-1.6755	1.2265	0.24853	0.50847	-5.0144	-2.6074	-2.1808	-0.77603	-0.68425	-1.9757	-1.8291
C2CD5	0.044159	5.8628	0.34826	0.73498	0.87658	-7.7263	5.8496	5.8218	5.9352	5.9138	6.098	5.5581
C2orf15	-0.0061888	-0.40246	-0.022645	0.98239	0.99308	-6.1923	-0.48304	-0.35982	-0.11445	-0.59809	-0.48092	-0.37842
C2orf27A	-0.26321	0.0047501	-1.0979	0.29837	0.55986	-5.7278	0.061657	0.2873	0.071964	-0.26367	-0.22567	0.096915
C2orf42	0.012717	3.4282	0.1293	0.89972	0.95776	-7.2904	3.4928	3.3195	3.5314	3.3608	3.4688	3.3959
C2orf47	6.8434e-05	3.9613	0.00081432	0.99937	0.99968	-7.4459	3.9552	4.0633	3.8928	3.812	3.9334	4.1111
C2orf48	0.20548	-0.9768	0.62473	0.54635	0.76649	-5.7949	-1.2289	-1.1335	-1.0028	-0.51679	-0.99772	-0.98109
C2orf49	-0.017274	5.2673	-0.31385	0.76019	0.89032	-7.6494	5.2877	5.2824	5.2775	5.2238	5.2748	5.2577
C2orf68	-0.040113	4.4057	-0.56127	0.58716	0.79364	-7.3661	4.4583	4.3931	4.4306	4.3357	4.3588	4.4576
C2orf69	-0.075352	5.52	-1.3904	0.19504	0.4428	-6.7818	5.632	5.5904	5.426	5.4081	5.5675	5.4958
C2orf72	1.5902	-2.8331	2.0627	0.066525	0.2337	-3.9005	-3.7918	-4.5028	-2.0338	-1.2803	-1.9757	-3.414
C2orf74	-0.34623	-2.2565	-0.73536	0.47927	0.71766	-5.3837	-2.3932	-2.0003	-2.0338	-2.0628	-2.7722	-2.2765
C2orf76	-0.041572	2.653	-0.29263	0.77588	0.89773	-7.0466	2.7218	2.7228	2.6349	2.6575	2.8457	2.3355
C2orf81	-0.3409	-3.4265	-0.34755	0.7355	0.87686	-5.2341	-4.9293	-2.9178	-2.1651	-2.1831	-5.4351	-2.9286
C2orf82	0.23596	0.017823	0.822	0.43054	0.67961	-5.9369	-0.33236	-0.11046	0.64228	-0.020113	-0.0088559	-0.06355
C2orf88	-0.35443	5.0544	-4.9649	0.00059327	0.0091866	-0.90195	5.3573	5.2626	4.9107	4.9159	5.0355	4.8443
C3	-1.1441	-2.371	-2.0365	0.069492	0.23996	-4.0128	-1.825	-1.8398	-2.857	-2.3143	-3.5607	-1.8291
C3AR1	0.58248	1.7586	3.5214	0.0056602	0.045761	-2.465	1.2123	1.5633	1.9779	2.078	2.0051	1.7152
C3orf14	0.18399	1.6266	1.2624	0.2359	0.49322	-5.9901	1.4318	1.6057	1.7869	1.6288	1.7112	1.5949
C3orf18	0.003058	1.1173	0.015844	0.98768	0.99492	-6.6073	0.80947	1.0721	1.3555	1.527	0.78082	1.1588
C3orf20	-0.37051	-2.7953	-0.55518	0.59117	0.79616	-5.3357	-3.0033	-2.3873	-2.6505	-1.9517	-2.6278	-4.151
C3orf33	0.18306	2.8291	1.8299	0.097674	0.29537	-5.5689	2.8081	2.6504	2.8024	2.8384	2.9356	2.94
C3orf35	-0.28283	-0.73758	-0.90225	0.38847	0.64256	-5.6849	-0.59301	-0.41531	-1.0028	-0.55687	-0.64504	-1.2124
C3orf38	0.1135	5.0058	1.7556	0.11017	0.31767	-6.1881	4.9463	5.0383	4.935	4.9529	5.1395	5.0231
C3orf52	0.16609	2.156	1.2518	0.23958	0.4978	-6.1782	2.1085	2.0872	1.9779	2.1168	2.1673	2.4783
C3orf58	0.024074	5.0128	0.38858	0.70586	0.86203	-7.564	4.9346	4.9804	5.1022	5.133	5.0144	4.9124
C3orf62	0.15508	2.4431	1.3624	0.20342	0.45293	-6.1071	2.3129	2.463	2.4566	2.4406	2.5668	2.4188
C3orf67	0.088473	0.81782	0.38341	0.70957	0.8637	-6.4349	0.31102	0.92349	1.1637	1.1943	0.5113	0.80318
C3orf80	0.20573	2.8609	1.8696	0.091537	0.28414	-5.529	2.7389	2.9374	2.7349	2.7952	3.0766	2.8824
C4A	-0.32794	-1.2153	-0.86926	0.4054	0.65802	-5.5291	-1.3686	-1.1335	-0.67475	-1.0919	-1.8106	-1.2124
C4orf3	-0.056231	6.0195	-1.0971	0.29872	0.56039	-7.18	5.9639	5.9154	6.2445	6.2098	5.8689	5.9146
C4orf32	-0.07767	4.4244	-1.2319	0.24661	0.50614	-6.7728	4.5049	4.5279	4.3214	4.3289	4.446	4.4176
C4orf33	0.013016	3.8216	0.16657	0.87108	0.94397	-7.3757	3.8196	3.7467	3.8824	3.9016	3.8418	3.7377
[truncated: 15,732 more rows]

## Sheet: KOvsWT D3
Supplemental Table 2: RNA transcriptome and ATAC-seq analysis of wild type and KMT2D-sgRNA2 mediated knockout (KMT2D KO) HUDEP-2 cells.
gene	logFC	AveExpr	t	P.Value	adj.P.Val	B	PXU016_log2CPM	PXU017_log2CPM	PXU018_log2CPM	PXU019_log2CPM	PXU020_log2CPM	PXU021_log2CPM
HBA2	-1.9604	9.7913	-50.378	2.5542e-24	2.2559e-20	45.663	10.827	10.798	9.7005	9.7191	8.8205	8.8821
SLC4A1	-2.2819	8.6641	-49.613	3.5737e-24	2.2559e-20	45.232	9.8235	9.8528	8.5767	8.6129	7.6292	7.4895
VIM	2.1571	8.8742	49.578	3.6281e-24	2.2559e-20	45.184	7.6278	7.6269	9.1808	9.2395	9.8084	9.762
HPGD	2.8318	7.6564	45.085	2.9081e-23	1.3561e-19	42.967	5.9993	5.8871	8.204	8.3031	8.6903	8.8543
ALAS2	-1.7562	8.5056	-41.447	1.8306e-22	6.8294e-19	41.5	9.4089	9.4574	8.3872	8.4274	7.6674	7.6856
SLC25A37	-1.493	10.695	-38.347	9.9913e-22	3.1061e-18	39.92	11.5	11.495	10.633	10.531	10.025	9.9853
TPSAB1	1.904	7.1949	37.74	1.4145e-21	3.7693e-18	39.348	6.0082	6.005	7.6758	7.6601	7.9014	7.9191
RP11-20D14.6	-2.0332	6.1958	-35.685	4.7865e-21	1.116e-17	38.146	7.2351	7.3296	6.0257	6.0941	5.2015	5.2887
TPSB2	1.6135	7.8563	34.329	1.1111e-20	2.3028e-17	37.463	6.8533	6.9211	8.1569	8.2049	8.504	8.4974
AHNAK	1.5166	8.1581	31.167	9.0345e-20	1.6852e-16	35.421	7.2924	7.1807	8.4421	8.5276	8.7418	8.7641
HBD	-1.4204	9.3227	-30.094	1.9274e-19	3.0784e-16	34.673	10.115	10.08	9.1402	9.2524	8.6036	8.745
KIF26A	-1.5437	6.8533	-29.998	2.0647e-19	3.0784e-16	34.584	7.7538	7.677	6.7108	6.6309	6.2059	6.1417
HBM	-1.6932	6.392	-29.945	2.1455e-19	3.0784e-16	34.519	7.2748	7.2459	6.3679	6.3169	5.6531	5.4936
SLC2A1	-1.2896	7.8809	-29.476	3.0178e-19	4.0208e-16	34.228	8.5752	8.5826	7.7541	7.7948	7.2905	7.2882
HBG2	-1.4914	7.0509	-29.239	3.591e-19	4.2313e-16	34.046	7.9705	7.9561	6.7142	6.7285	6.396	6.54
EPB42	-1.3545	7.762	-29.225	3.6295e-19	4.2313e-16	34.043	8.4532	8.528	7.6311	7.6893	7.119	7.1514
TNS1	-2.7924	3.8375	-28.339	7.0471e-19	7.7323e-16	32.424	5.2638	5.253	3.7128	3.8403	2.5478	2.4074
SELENBP1	-1.8281	5.1913	-28.117	8.3508e-19	8.6538e-16	33.062	6.1399	6.1458	5.1753	5.0561	4.3207	4.3101
FLNA	1.1212	9.521	27.744	1.1131e-18	1.0624e-15	32.911	8.8604	8.8511	9.6995	9.7623	9.9612	9.9918
TRIM10	-2.4439	4.1823	-27.714	1.1391e-18	1.0624e-15	32.288	5.3811	5.3088	4.2834	4.2959	2.9799	2.8444
ANXA1	2.73	5.4327	27.049	1.9217e-18	1.7069e-15	31.917	3.6684	3.6985	6.1001	6.3101	6.3427	6.4763
LCP1	1.3306	7.6908	26	4.4927e-18	3.8092e-15	31.534	6.8408	6.8714	7.9761	8.0862	8.146	8.2241
FBN1	1.8755	5.4394	25.184	8.894e-18	7.2131e-15	30.692	4.3201	4.2569	5.822	5.9045	6.2033	6.1299
HEMGN	-1.2507	7.531	-24.951	1.085e-17	8.4326e-15	30.647	8.1667	8.2344	7.3777	7.5094	6.9336	6.9644
PHOSPHO1	-1.7085	5.0169	-24.744	1.2968e-17	9.6758e-15	30.406	5.9704	5.9204	4.9525	4.7843	4.2359	4.2381
IQGAP2	1.3747	6.6131	24.412	1.731e-17	1.2349e-14	30.189	5.7815	5.8336	6.817	6.886	7.1384	7.2219
CSF2RB	1.3978	6.2325	24.375	1.7875e-17	1.2349e-14	30.147	5.3975	5.4603	6.4331	6.449	6.8498	6.8053
CPEB4	-1.3365	6.6601	-24.311	1.8907e-17	1.2596e-14	30.101	7.4222	7.3748	6.569	6.4623	6.1292	6.0031
RAP1GAP	-1.3603	5.8072	-24.204	2.078e-17	1.3007e-14	30.003	6.5637	6.5352	5.6895	5.6698	5.2293	5.1558
SIGLEC6	1.9514	5.3656	24.16	2.159e-17	1.3007e-14	29.816	4.1207	4.1781	5.925	5.7655	6.1292	6.0752
NARF	-1.0902	7.4671	-24.159	2.1616e-17	1.3007e-14	29.955	8.0703	8.0729	7.3624	7.3343	6.9798	6.9828
ATP1B2	-2.1047	4.4088	-24.076	2.3257e-17	1.3515e-14	29.682	5.469	5.4348	4.5492	4.329	3.257	3.4137
ACTG1	1.0779	8.1662	24.045	2.3909e-17	1.3515e-14	29.844	7.5636	7.5256	8.3432	8.3219	8.5915	8.6512
NMU	1.3625	6.5545	23.882	2.7652e-17	1.517e-14	29.722	5.6869	5.6911	6.8661	6.9795	7.0571	7.0464
PRDX2	-0.97593	9.5187	-23.419	4.1942e-17	2.2353e-14	29.225	10.051	10.082	9.3526	9.4466	9.0611	9.1184
TSC22D3	-1.262	5.9966	-23.298	4.6845e-17	2.4272e-14	29.198	6.6409	6.6547	5.9492	5.9595	5.412	5.3635
ARHGDIB	1.6943	5.4805	23.112	5.5581e-17	2.7824e-14	28.958	4.3845	4.4965	5.8304	5.908	6.0905	6.1729
GDF15	-1.0842	7.2271	-23.071	5.7681e-17	2.7824e-14	28.971	7.8377	7.8489	7.0925	7.0621	6.7902	6.731
PKM	1.5042	5.8667	23.062	5.8176e-17	2.7824e-14	28.958	4.8766	4.8955	6.3397	6.3135	6.3385	6.4364
PRKCB	1.1509	7.0651	22.94	6.515e-17	2.9815e-14	28.862	6.3176	6.375	7.3366	7.3667	7.5104	7.4847
RUNDC3A	-2.983	2.9105	-22.933	6.5535e-17	2.9815e-14	27.611	4.4224	4.465	2.7812	2.8518	1.538	1.4049
SAMD5	1.7771	5.1353	22.701	8.1381e-17	3.6143e-14	28.521	4.0739	4.0173	5.5499	5.5191	5.8688	5.7832
GATA2	1.2537	7.0035	22.638	8.6303e-17	3.7437e-14	28.581	6.2575	6.2755	7.2274	7.2137	7.5952	7.4517
ARG2	-1.6257	4.5668	-22.531	9.5472e-17	4.0474e-14	28.41	5.439	5.4496	4.4307	4.4546	3.7758	3.8509
AQP1	-2.008	4.1858	-22.503	9.8012e-17	4.0627e-14	28.276	5.2459	5.1757	4.0316	4.2335	3.2848	3.1434
PLEC	1.0124	8.0592	22.369	1.1125e-16	4.5111e-14	28.292	7.473	7.4407	8.2766	8.2247	8.4918	8.4486
DMTN	-1.2127	6.4292	-22.254	1.2413e-16	4.9263e-14	28.219	7.111	7.0431	6.3679	6.3165	5.924	5.8126
NEFH	1.1539	7.2619	22.171	1.3428e-16	5.2182e-14	28.128	6.6472	6.6001	7.3526	7.4205	7.724	7.8267
NATD1	-1.1891	6.2098	-22.086	1.458e-16	5.5293e-14	28.062	6.8865	6.8267	6.0669	6.1446	5.6584	5.6756
ACSBG1	-1.2366	6.0479	-22.068	1.4821e-16	5.5293e-14	28.048	6.732	6.68	6.023	5.9135	5.4667	5.472
LAPTM5	1.0334	7.6766	21.976	1.6195e-16	5.9233e-14	27.926	7.0248	7.0647	7.8753	7.9396	8.0693	8.0862
NUDT4	-1.0124	8.3918	-21.943	1.6719e-16	5.9972e-14	27.857	8.9235	8.975	8.2364	8.3452	7.9039	7.967
ARG1	-2.8575	3.1626	-21.845	1.8396e-16	6.4214e-14	26.997	4.6718	4.5871	3.0549	3.1841	1.538	1.9401
GYPA	-1.0875	7.6999	-21.834	1.859e-16	6.4214e-14	27.775	8.2488	8.2959	7.5899	7.7	7.1332	7.2317
RORA	-1.5936	4.4807	-21.685	2.1491e-16	7.2887e-14	27.608	5.3122	5.3029	4.4334	4.4074	3.7159	3.7126
BTG2	-1.1948	5.9556	-21.583	2.3745e-16	7.9091e-14	27.578	6.5865	6.6169	5.8663	5.8432	5.4519	5.3687
OSBP2	-1.0046	7.191	-21.386	2.8817e-16	9.4304e-14	27.347	7.7524	7.7718	7.0574	7.0463	6.7871	6.7307
ITPR2	1.1794	6.2909	21.357	2.9645e-16	9.4973e-14	27.358	5.5939	5.5877	6.5273	6.4962	6.7648	6.7752
C12orf75	1.6632	5.1631	21.344	3.004e-16	9.4973e-14	27.286	4.2406	4.132	5.4037	5.4967	5.8915	5.814
TXNIP	-0.85911	9.5109	-21.237	3.3402e-16	1.0384e-13	27.111	9.9168	9.974	9.4676	9.5343	9.0929	9.0801
SLC25A39	-0.8858	8.4594	-21.084	3.8906e-16	1.1897e-13	26.996	8.9065	8.9504	8.4057	8.4096	8.0292	8.055
TPM4	1.3851	5.812	20.943	4.4846e-16	1.3492e-13	26.946	4.8688	5.0557	6.1274	6.1258	6.3601	6.3344
DUSP1	-1.2025	5.7027	-20.836	4.9976e-16	1.4797e-13	26.837	6.3773	6.318	5.6321	5.5924	5.1795	5.117
CCND3	-0.98228	7.0569	-20.554	6.6555e-16	1.9398e-13	26.505	7.5771	7.6192	6.9379	6.9773	6.601	6.6291
HBA1	-1.6119	8.2846	-20.487	7.1305e-16	2.0462e-13	26.383	9.1354	9.2541	8.0987	8.0341	7.8101	7.3749
BPGM	-1.4943	4.9984	-20.265	8.9659e-16	2.5339e-13	26.255	5.797	5.7983	4.8516	4.965	4.1758	4.403
SMIM5	-1.4033	4.8762	-20.19	9.6955e-16	2.6876e-13	26.174	5.6302	5.5865	4.8246	4.7887	4.2818	4.1457
SDC3	1.6611	4.8419	20.168	9.9194e-16	2.6876e-13	26.085	3.8969	3.8965	5.0252	5.1109	5.6012	5.5207
ZNF521	1.7634	4.9329	20.166	9.9417e-16	2.6876e-13	26.083	3.7893	3.9769	5.3128	5.2195	5.7039	5.5952
PDZK1IP1	-1.862	3.8821	-20.027	1.1497e-15	3.0545e-13	25.857	4.7736	4.8837	3.8587	3.8714	2.8691	3.0364
MSN	0.9985	8.4997	20.016	1.1627e-15	3.0545e-13	25.889	7.8447	7.9493	8.6429	8.7728	8.8645	8.924
SLC6A19	-1.0774	6.1219	-19.967	1.225e-15	3.1736e-13	25.925	6.7518	6.6714	6.0302	6.0078	5.6454	5.6249
SLC30A1	-1.0545	6.7528	-19.878	1.3455e-15	3.438e-13	25.803	7.4051	7.2994	6.5584	6.6593	6.287	6.3076
SNHG12	-0.96937	6.9286	-19.861	1.3688e-15	3.4503e-13	25.781	7.4302	7.42	6.9398	6.871	6.4486	6.4621
TMCC2	-1.2478	5.1995	-19.831	1.4133e-15	3.515e-13	25.805	5.8993	5.9281	5.0216	5.0048	4.7239	4.6191
PTRF	1.1887	6.3108	19.652	1.7087e-15	4.1936e-13	25.601	5.5555	5.6637	6.4663	6.5804	6.8281	6.7706
FOXO3	-0.90444	7.4744	-19.483	2.0483e-15	4.962e-13	25.345	8.0135	7.9573	7.3362	7.379	7.0625	7.0978
SLC29A1	-0.88685	7.3235	-19.326	2.4268e-15	5.8036e-13	25.179	7.8155	7.8258	7.1987	7.2328	6.9386	6.9295
FAM65C	-1.5276	5.9991	-19.233	2.6852e-15	6.3402e-13	25.14	6.8812	6.7323	6.0651	5.7416	5.3747	5.1995
SLC22A4	-1.3336	4.6292	-19.107	3.0807e-15	7.1501e-13	25.026	5.3783	5.4033	4.4686	4.4074	4.0704	4.0469
PPP1R26	1.6227	5.0203	19.094	3.1252e-15	7.1501e-13	24.988	3.9007	4.1846	5.3754	5.3287	5.6972	5.6351
GCSAML	1.9938	4.3529	19.089	3.1432e-15	7.1501e-13	24.738	3.0342	2.8827	5.1605	5.1359	4.94	4.9639
IL6ST	-1.166	5.6866	-19.004	3.4497e-15	7.7526e-13	24.898	6.353	6.3377	5.4464	5.6237	5.1773	5.1812
TMOD1	-1.1143	5.5357	-18.981	3.5369e-15	7.8541e-13	24.879	6.135	6.1696	5.445	5.3843	5.0641	5.0162
FLNB	0.9506	7.3813	18.829	4.1827e-15	9.1788e-13	24.637	6.8607	6.7805	7.519	7.588	7.7363	7.8035
MAGI1	1.2611	5.604	18.807	4.285e-15	9.294e-13	24.701	4.9131	4.7914	5.8094	5.8854	6.0877	6.1371
YPEL4	-1.1367	5.8347	-18.703	4.811e-15	1.0315e-12	24.557	6.4147	6.5129	5.7795	5.6418	5.3617	5.2975
ENPP3	1.042	6.3776	18.681	4.934e-15	1.0458e-12	24.527	5.7111	5.7685	6.6199	6.6065	6.7453	6.8144
FUT1	-0.88685	7.5365	-18.646	5.1289e-15	1.0749e-12	24.407	8.028	8.0354	7.4698	7.3922	7.1854	7.108
ST6GALNAC4	-1.1136	5.8236	-18.618	5.294e-15	1.0972e-12	24.46	6.3965	6.4981	5.7446	5.6304	5.3664	5.3057
LITAF	1.9881	4.1799	18.53	5.8437e-15	1.1978e-12	24.176	2.895	3.1102	4.4872	4.6075	4.9926	4.9869
RHD	-2.3343	2.8392	-18.472	6.2373e-15	1.2646e-12	23.766	4.0007	4.053	2.8068	2.8054	1.6397	1.7299
BLVRB	-0.7826	9.4276	-18.353	7.1355e-15	1.4312e-12	23.978	9.805	9.8795	9.3403	9.4239	9.0318	9.0854
ACTB	0.66763	10.943	18.33	7.3245e-15	1.4534e-12	23.891	10.537	10.58	11.023	11.065	11.219	11.233
SNX22	-1.3387	4.8228	-18.21	8.397e-15	1.6487e-12	24.033	5.4729	5.6462	4.7139	4.6523	4.27	4.1816
STON2	1.1413	5.6812	18.118	9.3278e-15	1.8124e-12	23.919	4.9998	5.0433	5.8356	5.8793	6.1955	6.1337
IQGAP1	1.0774	6.3686	18.099	9.5262e-15	1.8209e-12	23.862	5.7144	5.7512	6.4876	6.6396	6.8002	6.8189
DNAJA4	-0.756	8.3546	-18.096	9.5669e-15	1.8209e-12	23.728	8.7932	8.77	8.259	8.255	8.019	8.0317
EPAS1	1.5968	4.5409	18.034	1.0274e-14	1.9358e-12	23.779	3.6134	3.6386	4.8288	4.7244	5.191	5.249
GRAMD4	0.95116	6.8155	18.013	1.0525e-14	1.9633e-12	23.731	6.2417	6.2838	6.9849	6.9509	7.2602	7.1716
GLUL	0.72086	10.729	18.003	1.0639e-14	1.9649e-12	23.517	10.265	10.366	10.8	10.872	11.037	11.035
MRPL16	0.97237	6.8982	17.949	1.1332e-14	2.065e-12	23.651	6.2922	6.3672	7.0578	7.0737	7.2423	7.3561
CTD-3014M21.1	-1.1694	5.3373	-17.943	1.1403e-14	2.065e-12	23.715	5.8496	5.9444	5.3495	5.4357	4.6753	4.7692
TPSD1	1.3557	4.9138	17.902	1.1965e-14	2.146e-12	23.673	4.0941	4.1118	5.19	5.1679	5.4701	5.4488
CAT	-0.76202	8.3672	-17.857	1.2607e-14	2.2396e-12	23.446	8.7524	8.8019	8.2898	8.3291	8.0165	8.0137
TUBG2	-1.4586	5.1212	-17.832	1.2982e-14	2.2845e-12	23.59	5.9259	5.9435	5.11	4.7756	4.573	4.3992
SLC6A9	-1.1328	5.0505	-17.766	1.401e-14	2.4423e-12	23.516	5.6946	5.6798	4.896	4.9162	4.5905	4.5256
HHEX	1.2258	5.457	17.758	1.4141e-14	2.4424e-12	23.511	4.6695	4.7679	5.7324	5.678	5.9899	5.904
NCEH1	-0.99673	6.0512	-17.719	1.48e-14	2.5327e-12	23.408	6.627	6.5825	5.8785	6.0017	5.6161	5.6013
DOCK2	1.4335	5.3933	17.633	1.637e-14	2.7759e-12	23.368	4.6673	4.3831	5.7523	5.6316	6.0061	5.9196
RNF130	1.0512	6.1188	17.477	1.9673e-14	3.306e-12	23.143	5.4482	5.5406	6.2631	6.3693	6.5562	6.5353
ESYT1	0.75202	8.6845	17.426	2.0898e-14	3.4804e-12	22.922	8.2272	8.2531	8.7886	8.8556	8.9704	9.0123
ROGDI	-1.1166	5.5584	-17.399	2.1578e-14	3.5618e-12	23.058	6.1616	6.1341	5.5282	5.4468	5.1279	4.9518
FOSB	-1.4308	4.7855	-17.376	2.2192e-14	3.6311e-12	23.065	5.57	5.4893	4.882	4.5752	4.0907	4.1057
BAIAP2	-1.3554	4.5302	-17.317	2.3793e-14	3.8592e-12	22.998	5.2092	5.2188	4.5467	4.4628	3.969	3.7746
TSPAN5	-2.2587	2.8832	-17.309	2.4032e-14	3.8644e-12	22.581	4.067	3.9506	2.9968	2.7751	1.78	1.7299
RIOK3	-0.84655	7.0524	-17.171	2.8364e-14	4.522e-12	22.688	7.4957	7.5243	6.9551	7.0165	6.6237	6.6991
MYO1G	1.9254	3.9987	17.05	3.2818e-14	5.0956e-12	22.444	2.7494	2.6315	4.7094	4.6713	4.6063	4.6246
LY6E	1.1623	5.3967	17.049	3.2835e-14	5.0956e-12	22.671	4.6963	4.6374	5.6547	5.7348	5.8168	5.8404
TRPV2	1.3198	4.8342	17.043	3.3067e-14	5.0956e-12	22.667	4.0184	4.0459	5.1236	5.1109	5.3691	5.3372
ENO1	0.72163	9.5547	17.037	3.3325e-14	5.0956e-12	22.397	9.1026	9.1631	9.6401	9.7154	9.8216	9.8852
APPL1	1.4925	4.7647	17.037	3.3327e-14	5.0956e-12	22.652	3.9084	3.7946	5.1422	5.0651	5.2735	5.4046
METTL7A	-0.95137	5.8443	-16.997	3.4961e-14	5.3019e-12	22.55	6.3326	6.4119	5.7479	5.7337	5.4093	5.4303
PRSS57	2.8596	3.5489	16.955	3.682e-14	5.5387e-12	21.841	1.9953	1.4556	4.2895	4.3932	4.5072	4.6526
SCPEP1	-1.2917	4.7885	-16.896	3.9546e-14	5.894e-12	22.487	5.4754	5.4762	4.7606	4.6234	4.3053	4.0901
CELF2	1.0796	5.7863	16.89	3.9814e-14	5.894e-12	22.454	5.0662	5.1902	6.0607	5.9839	6.2275	6.1895
MACF1	0.77478	8.1844	16.833	4.2712e-14	6.2733e-12	22.219	7.7372	7.6469	8.4237	8.3636	8.4766	8.4581
COL18A1	-0.87022	7.4977	-16.824	4.3176e-14	6.2918e-12	22.232	7.9889	7.9768	7.4577	7.3321	7.1748	7.0561
GYPB	-1.0615	5.159	-16.721	4.9018e-14	7.0878e-12	22.256	5.6712	5.7248	5.1151	5.1721	4.6266	4.644
FAM83A	-0.7623	7.3378	-16.693	5.0704e-14	7.2753e-12	22.077	7.779	7.7678	7.2171	7.2404	7.0136	7.0088
CBFB	1.3801	4.9097	16.615	5.5846e-14	7.9519e-12	22.15	3.9718	4.2006	5.1835	5.1795	5.4156	5.5072
ACSL4	0.7847	8.1001	16.589	5.7632e-14	8.144e-12	21.916	7.6607	7.5866	8.2184	8.3188	8.4017	8.4147
GPI	0.81646	7.0321	16.577	5.8525e-14	8.208e-12	21.966	6.5558	6.5751	7.1281	7.168	7.402	7.3636
CAPRIN2	-1.019	6.9737	-16.565	5.9376e-14	8.2653e-12	21.939	7.514	7.5157	7.02	6.7931	6.5679	6.4314
LIF	2.0159	3.9967	16.481	6.5909e-14	9.1066e-12	21.805	2.7747	2.6689	4.6304	4.4215	4.7821	4.7028
GUK1	-0.81715	6.59	-16.466	6.7154e-14	9.2105e-12	21.838	7.0191	7.0395	6.5305	6.5284	6.1991	6.2236
PLXNA1	0.87298	6.7417	16.438	6.9514e-14	9.4646e-12	21.814	6.2575	6.193	6.9296	6.8702	7.1313	7.0686
HS6ST1	1.6853	4.1386	16.392	7.3644e-14	9.9542e-12	21.79	3.1676	3.0477	4.5693	4.4574	4.8069	4.7829
DCAF11	-0.80124	6.846	-16.375	7.5286e-14	1.0103e-11	21.704	7.2707	7.3086	6.7586	6.7642	6.4599	6.5138
TRAF5	1.1187	5.2588	16.251	8.7925e-14	1.1715e-11	21.686	4.665	4.5822	5.3981	5.4176	5.7755	5.7144
TCP11L2	-1.639	3.7647	-16.228	9.0548e-14	1.1979e-11	21.645	4.716	4.6064	3.5706	3.6975	2.848	3.1494
SMIM1	-1.0148	5.717	-16.216	9.1885e-14	1.207e-11	21.581	6.3418	6.1581	5.6617	5.668	5.2435	5.2292
MIR4732	-1.6776	3.9784	-16.151	9.9829e-14	1.2875e-11	21.566	4.8998	4.9034	4.0316	3.5846	3.2369	3.2144
VWA5A	0.7556	7.4577	16.147	1.0029e-13	1.2875e-11	21.388	6.9693	7.0166	7.6221	7.6421	7.7431	7.7533
MGST1	1.6472	4.1135	16.147	1.0035e-13	1.2875e-11	21.49	3.1612	3.0406	4.516	4.4723	4.7137	4.7771
KLF10	-0.86664	6.1746	-16.143	1.0077e-13	1.2875e-11	21.454	6.6265	6.6217	6.1675	6.1219	5.7199	5.79
UBAC1	-0.70284	8.2271	-16.133	1.021e-13	1.2956e-11	21.309	8.5854	8.6607	8.1419	8.135	7.9148	7.925
CTD-3154N5.2	-2.4177	2.4826	-16.105	1.0584e-13	1.3339e-11	20.978	3.7127	3.6526	2.6363	2.3505	1.3101	1.2331
HBB	-0.98719	14.61	-16.068	1.1085e-13	1.3852e-11	20.956	15.179	15.039	14.505	14.698	13.986	14.253
PIK3IP1	-2.0492	3.1085	-16.064	1.1139e-13	1.3852e-11	21.287	4.0042	4.2721	3.1177	3.0421	2.2267	1.9882
ANKRD9	-0.95237	5.7275	-16.053	1.1298e-13	1.3956e-11	21.369	6.2296	6.245	5.6652	5.6436	5.358	5.2234
DST	-1.0281	5.5136	-16.032	1.16e-13	1.4235e-11	21.359	6.1037	6.0258	5.5153	5.3567	5.0732	5.0071
TMSB4X	0.89332	7.0943	15.875	1.4186e-13	1.7295e-11	21.064	6.5619	6.468	7.3103	7.4138	7.3483	7.4634
LRP4	2.5204	2.9143	15.819	1.5255e-13	1.8477e-11	20.419	1.4632	1.5587	3.1973	3.1972	4.0635	4.0058
AHSP	-0.69213	8.8879	-15.799	1.5647e-13	1.8802e-11	20.834	9.2142	9.2868	8.8213	8.8914	8.5248	8.5892
PTPRC	1.3006	4.8333	15.792	1.5793e-13	1.8802e-11	21.118	4.0007	3.9917	5.1489	5.2708	5.2605	5.3272
PIGQ	-0.93633	6.8138	-15.79	1.5826e-13	1.8802e-11	20.946	7.3556	7.3035	6.8176	6.6138	6.4486	6.344
AHNAK2	-1.464	4.0761	-15.777	1.6097e-13	1.9004e-11	21.099	4.9854	4.7893	4.0316	3.8171	3.365	3.468
TRIB2	1.122	5.0944	15.772	1.6213e-13	1.902e-11	21.08	4.4953	4.4219	5.2457	5.2371	5.6122	5.5541
SPTAN1	1.9798	3.5993	15.756	1.6535e-13	1.9277e-11	20.83	2.4264	2.3845	4.0134	3.9874	4.4488	4.3356
ART4	-1.8171	3.1219	-15.734	1.7028e-13	1.9729e-11	20.912	4.0739	4.0775	3.1447	2.9048	2.3062	2.2245
MIR22HG	-1.3576	3.8277	-15.713	1.7503e-13	2.0153e-11	21.008	4.5791	4.5773	3.6623	3.7021	3.2369	3.2086
RNF213	-0.81378	8.2647	-15.644	1.914e-13	2.1903e-11	20.661	8.7589	8.6922	8.2344	8.0742	7.9707	7.8578
TMSB10	0.79149	7.1856	15.618	1.9783e-13	2.25e-11	20.715	6.638	6.71	7.4045	7.4337	7.4251	7.5021
PFKM	-0.91252	5.5364	-15.607	2.0079e-13	2.2699e-11	20.801	6.0056	6.0596	5.4505	5.4591	5.1431	5.1007
MIR223	1.5929	4.3331	15.577	2.0887e-13	2.347e-11	20.815	3.3583	3.3243	4.7801	4.6523	5.0164	4.8671
SGK1	-1.126	6.2447	-15.538	2.1973e-13	2.4543e-11	20.653	6.8724	6.8001	6.347	6.0217	5.7558	5.6714
LAPTM4B	0.91666	6.498	15.522	2.2445e-13	2.4915e-11	20.639	5.8906	6.0204	6.6011	6.7319	6.8784	6.8658
STS	2.111	3.3502	15.513	2.2687e-13	2.4915e-11	20.406	2.0653	2.1135	3.7128	3.8022	4.2318	4.1756
ABCA7	-0.95885	7.0604	-15.513	2.2707e-13	2.4915e-11	20.559	7.6367	7.579	7.0458	6.7975	6.7033	6.6003
ARHGAP45	1.4297	4.5885	15.497	2.3171e-13	2.5276e-11	20.736	3.7975	3.6433	4.9468	4.8304	5.217	5.096
TIMP1	0.80528	7.3478	15.471	2.4001e-13	2.6029e-11	20.508	6.7576	6.8395	7.6194	7.6677	7.5485	7.6541
SH3GLB2	-0.70877	7.448	-15.462	2.4276e-13	2.6175e-11	20.467	7.8392	7.8711	7.3659	7.3198	7.1394	7.1526
SOX6	-1.3255	4.0986	-15.421	2.5612e-13	2.7457e-11	20.639	4.8746	4.7528	4.0779	3.9157	3.4619	3.5086
STX3	1.2796	4.5706	15.38	2.7035e-13	2.8816e-11	20.585	3.858	3.8114	4.754	4.7778	5.0755	5.1468
ANXA11	1.1236	5.0154	15.356	2.7899e-13	2.9568e-11	20.543	4.297	4.3633	5.272	5.2489	5.4813	5.4297
BTN2A2	2.0747	3.3819	15.346	2.8277e-13	2.9799e-11	20.205	2.158	2.0299	3.9147	3.8508	4.1651	4.1727
CHAC1	-0.81569	6.1835	-15.321	2.9241e-13	3.0642e-11	20.369	6.5919	6.5904	6.2137	6.1522	5.7914	5.7616
CCNDBP1	-0.80477	6.7413	-15.3	3.0047e-13	3.1311e-11	20.297	7.1482	7.2064	6.6199	6.7316	6.3446	6.3971
CLDN7	-1.0786	4.5913	-15.292	3.0395e-13	3.1498e-11	20.452	5.1921	5.161	4.5082	4.4884	4.1064	4.0916
CCS	-0.91281	5.95	-15.249	3.2148e-13	3.313e-11	20.289	6.4629	6.3876	5.9367	5.8762	5.5909	5.4458
ATPIF1	-0.68747	7.4996	-15.233	3.2837e-13	3.3655e-11	20.156	7.8581	7.8615	7.4735	7.4607	7.1613	7.1824
CA1	-0.60163	12.154	-15.229	3.3047e-13	3.3685e-11	19.909	12.469	12.528	12.009	12.129	11.866	11.926
PFN1	0.67644	8.5944	15.217	3.3555e-13	3.4016e-11	20.075	8.1741	8.2495	8.6448	8.7209	8.8999	8.8771
DOCK11	1.1803	5.3071	15.177	3.541e-13	3.5703e-11	20.285	4.6028	4.6374	5.412	5.5986	5.7351	5.8567
DHCR24	0.95545	5.8775	15.109	3.8794e-13	3.8904e-11	20.141	5.2875	5.2759	6.0428	6.1851	6.23	6.2436
CCDC88B	-1.7248	3.7402	-15.024	4.3449e-13	4.334e-11	20.107	4.7924	4.5374	3.8004	3.4123	2.9992	2.8993
SPTBN1	1.147	4.9916	15.014	4.4064e-13	4.372e-11	20.085	4.2466	4.3915	5.172	5.2155	5.421	5.503
GPT	-1.0013	6.1885	-14.95	4.8034e-13	4.726e-11	19.857	6.7729	6.7195	6.2033	5.9377	5.8011	5.6964
ACSL1	-0.76537	6.5351	-14.948	4.8139e-13	4.726e-11	19.831	6.9435	6.9163	6.4836	6.541	6.1401	6.1862
GPCPD1	-0.92358	5.8754	-14.941	4.8601e-13	4.7463e-11	19.873	6.4524	6.301	5.8592	5.7343	5.444	5.4617
PTPN7	0.71556	7.9217	14.923	4.9806e-13	4.8387e-11	19.713	7.4591	7.5573	8.0222	8.0411	8.2652	8.1853
SPTA1	-0.88062	9.9947	-14.902	5.1237e-13	4.9293e-11	19.551	10.524	10.459	10.03	9.7307	9.6367	9.5871
RBM38	-0.79459	6.8829	-14.902	5.1267e-13	4.9293e-11	19.739	7.2689	7.386	6.7521	6.8204	6.5768	6.4931
SMOX	-1.8446	2.8554	-14.872	5.3363e-13	5.1045e-11	19.751	3.7387	3.9199	2.7463	2.7619	1.9775	1.9882
CRIM1	0.82903	6.4789	14.801	5.8762e-13	5.5923e-11	19.657	6.0477	5.9136	6.6544	6.6396	6.7857	6.8321
KAT2B	-0.83911	5.7305	-14.789	5.9749e-13	5.6573e-11	19.677	6.1632	6.1753	5.6652	5.7156	5.3542	5.3098
STK11	-0.66785	8.2065	-14.782	6.0307e-13	5.6814e-11	19.486	8.5767	8.5807	8.1713	8.0858	7.9458	7.8788
YPEL3	-1.4222	3.5966	-14.761	6.2088e-13	5.8198e-11	19.746	4.2941	4.3374	3.6196	3.526	2.9505	2.8519
ERFE	-0.7275	6.8418	-14.748	6.3187e-13	5.8932e-11	19.529	7.2389	7.2233	6.7932	6.7839	6.5419	6.4694
SLC26A2	0.72218	7.3009	14.707	6.6836e-13	6.2025e-11	19.453	6.9105	6.9041	7.3185	7.4115	7.6463	7.6141
GYPC	-0.61971	8.7501	-14.694	6.8067e-13	6.2803e-11	19.33	9.0613	9.0992	8.6738	8.7454	8.4555	8.4651
GCNT1	1.9195	3.5503	14.691	6.8349e-13	6.2803e-11	19.475	2.2571	2.4067	4.1262	4.0229	4.1968	4.2924
RANBP10	-0.81388	6.0851	-14.686	6.8764e-13	6.2875e-11	19.5	6.5709	6.5193	6.0092	5.9426	5.7755	5.6933
GNA15	0.73315	6.8058	14.612	7.6141e-13	6.9281e-11	19.361	6.367	6.3721	6.9532	6.9388	7.083	7.1205
TBC1D9B	0.89043	6.2274	14.58	7.9623e-13	7.2098e-11	19.371	5.6735	5.7369	6.4609	6.3006	6.6116	6.5809
TOP2B	0.70162	8.0635	14.574	8.0215e-13	7.2283e-11	19.214	7.6655	7.6417	8.1163	8.2482	8.3444	8.3652
RALB	0.7687	7.0107	14.561	8.1694e-13	7.284e-11	19.273	6.4949	6.6104	7.1314	7.1879	7.2898	7.3495
OPTN	-0.81283	6.3001	-14.559	8.1961e-13	7.284e-11	19.305	6.6982	6.7794	6.2113	6.2675	5.8668	5.9774
KDM7A	-1.1988	4.4233	-14.558	8.2005e-13	7.284e-11	19.468	5.073	5.0379	4.3194	4.427	3.7275	3.9549
LAMC1	0.94138	5.6718	14.528	8.5558e-13	7.5635e-11	19.353	5.0473	5.2078	5.8293	5.8131	6.0396	6.0934
CTSH	1.0789	5.2905	14.516	8.6909e-13	7.6468e-11	19.39	4.4671	4.5699	5.7752	5.7466	5.5285	5.6555
PSD4	0.8008	6.2183	14.502	8.8698e-13	7.7374e-11	19.258	5.7339	5.7866	6.3243	6.3407	6.5836	6.5405
ESPN	-1.1758	6.3693	-14.501	8.8769e-13	7.7374e-11	19.216	7.0918	6.9394	6.4454	6.0528	5.8883	5.7982
MYL4	-1.2033	4.1764	-14.486	9.0629e-13	7.8628e-11	19.379	4.8844	4.7893	4.0744	4.0665	3.5396	3.7044
EPOR	-0.69962	7.1396	-14.479	9.1517e-13	7.9031e-11	19.127	7.5431	7.5452	7.0596	6.9972	6.8787	6.8136
LYN	0.8462	6.4923	14.426	9.8595e-13	8.475e-11	19.128	5.952	6.0258	6.5789	6.729	6.8142	6.8536
HDAC5	-1.1911	4.1714	-14.401	1.0207e-12	8.7339e-11	19.261	4.8471	4.804	4.0531	4.0807	3.533	3.7105
SAMSN1	1.1598	4.6449	14.343	1.1068e-12	9.4273e-11	19.182	3.9273	3.9468	4.8638	4.936	5.1091	5.0865
STX2	-0.79556	6.0055	-14.331	1.1253e-12	9.5407e-11	19.004	6.486	6.427	5.8945	5.8965	5.7083	5.6205
PLEKHH3	-0.95013	7.2645	-14.275	1.2171e-12	1.0273e-10	18.825	7.8252	7.7556	7.2622	7.0511	6.9645	6.7282
FMNL1	1.1454	4.7101	14.255	1.2517e-12	1.0517e-10	19.058	4.0395	3.9161	5.027	5.0289	5.1311	5.1177
HBG1	-1.3545	4.3942	-14.2	1.353e-12	1.1305e-10	18.952	5.2489	5.3654	3.8464	3.9433	4.1947	3.7668
TANGO2	-0.76246	6.4248	-14.197	1.3576e-12	1.1305e-10	18.776	6.8323	6.8869	6.3072	6.321	6.1568	6.0443
BSG	-0.59981	9.4616	-14.189	1.3731e-12	1.1383e-10	18.565	9.7394	9.8373	9.3794	9.4378	9.1688	9.2067
UROS	-0.70871	6.8203	-14.153	1.4449e-12	1.1926e-10	18.681	7.2144	7.2478	6.6637	6.7523	6.5108	6.5327
TSTA3	-0.67883	7.6087	-14.086	1.5882e-12	1.3051e-10	18.531	7.9109	8.0153	7.6043	7.5515	7.3046	7.2654
TRIM67	1.9031	3.3732	14.066	1.6349e-12	1.3375e-10	18.608	2.2926	2.0723	3.887	3.8065	4.1196	4.0615
MXI1	-0.70071	6.5234	-14.045	1.685e-12	1.3725e-10	18.548	6.9261	6.9177	6.4124	6.4414	6.2219	6.2207
TAL1	-0.65694	8.0123	-14.028	1.7246e-12	1.3987e-10	18.417	8.3482	8.4369	7.8976	7.9166	7.7815	7.6933
NCOA4	-0.77959	8.3947	-13.975	1.8612e-12	1.5029e-10	18.316	8.7766	8.8404	8.2694	8.4315	7.9368	8.1133
TSPO2	-1.9671	2.612	-13.965	1.8872e-12	1.5173e-10	18.482	3.704	3.5662	2.5173	2.4851	1.8873	1.5122
SNHG22	-1.0667	5.7018	-13.942	1.9517e-12	1.5625e-10	18.477	6.3663	6.084	5.7066	5.7178	5.2645	5.0715
PPOX	-0.69046	6.8819	-13.937	1.9642e-12	1.5657e-10	18.363	7.2777	7.2712	6.827	6.7456	6.6042	6.5659
KCNQ1OT1	-1.0177	5.287	-13.924	2.001e-12	1.5868e-10	18.49	5.8306	5.8046	5.3422	5.1265	4.897	4.7212
ARRB2	-0.9137	4.9828	-13.922	2.0076e-12	1.5868e-10	18.515	5.4599	5.519	4.9059	4.8544	4.6063	4.551
PNRC1	-0.82042	6.0109	-13.882	2.126e-12	1.6733e-10	18.357	6.512	6.3679	6.0111	5.9318	5.6409	5.6018
CARNS1	-2.2795	2.2281	-13.873	2.155e-12	1.689e-10	18.162	3.4658	3.3475	2.3531	1.9462	1.1295	1.1266
RHCE	-2.1706	2.3456	-13.862	2.1891e-12	1.7085e-10	18.154	3.4396	3.2523	2.4538	2.5883	1.1295	1.2101
EGFL7	0.88358	5.966	13.839	2.2619e-12	1.758e-10	18.333	5.4534	5.4307	6.1806	6.072	6.3932	6.2657
EIF2AK1	-0.61153	7.757	-13.82	2.3256e-12	1.8e-10	18.128	8.1263	8.0917	7.6648	7.6651	7.4852	7.5087
NOTCH2	1.013	5.3745	13.816	2.3377e-12	1.8019e-10	18.368	4.7944	4.7462	5.4773	5.6568	5.8242	5.7482
AGPAT4	-1.5259	3.1713	-13.809	2.3608e-12	1.8122e-10	18.4	3.9645	3.9506	3.1514	3.1269	2.3292	2.5051
PHACTR1	1.2574	4.1786	13.801	2.3902e-12	1.825e-10	18.425	3.4449	3.5107	4.3015	4.3424	4.7455	4.7263
HAGH	-0.68561	6.6782	-13.799	2.397e-12	1.825e-10	18.176	7.0707	7.0265	6.6035	6.6423	6.3624	6.3637
OXCT1	0.76572	6.076	13.733	2.6361e-12	1.9988e-10	18.162	5.6209	5.619	6.2081	6.2365	6.3836	6.3876
SYNE3	-0.78535	5.7671	-13.724	2.6719e-12	2.0177e-10	18.147	6.1791	6.1785	5.772	5.6897	5.3691	5.414
TBC1D22B	-0.72431	6.2715	-13.719	2.6901e-12	2.0233e-10	18.091	6.7081	6.6312	6.1977	6.199	5.9595	5.9333
BDH1	1.4437	4.1872	13.688	2.8122e-12	2.1067e-10	18.263	3.4022	3.2767	4.3974	4.4991	4.6798	4.868
ARRDC2	-0.7393	6.1385	-13.578	3.3007e-12	2.4627e-10	17.893	6.5823	6.5321	6.0634	6.012	5.8576	5.7837
SLC2A4	-1.0253	4.5551	-13.565	3.3678e-12	2.5028e-10	18.034	5.073	5.1676	4.5263	4.3717	4.1086	4.0838
SPTB	-0.52915	9.5157	-13.542	3.4801e-12	2.576e-10	17.602	9.8457	9.8149	9.4362	9.3942	9.3155	9.2879
ARPC5	0.87666	5.8449	13.519	3.599e-12	2.6534e-10	17.875	5.3866	5.2251	6.0347	6.0627	6.1314	6.229
ARHGAP23	-1.2592	4.2963	-13.492	3.7441e-12	2.7496e-10	17.95	5.1313	4.8475	4.2371	4.0772	3.8198	3.6648
UCP2	-0.63256	7.2586	-13.483	3.7948e-12	2.7759e-10	17.661	7.6193	7.586	7.1987	7.2048	6.9973	6.9456
E2F2	-0.76522	5.6827	-13.469	3.8772e-12	2.8251e-10	17.774	6.1194	6.0814	5.6286	5.5936	5.3505	5.3225
CREBRF	-0.91726	4.7904	-13.432	4.0929e-12	2.9706e-10	17.812	5.3562	5.2744	4.6866	4.6283	4.3989	4.3979
MKNK2	-0.66089	8.0389	-13.429	4.1123e-12	2.9731e-10	17.521	8.4178	8.4611	7.903	7.8876	7.8598	7.7039
ACHE	-0.90949	5.015	-13.409	4.2316e-12	3.0476e-10	17.756	5.5761	5.4536	4.9118	4.9261	4.6588	4.5635
GABARAPL1	-1.1942	3.8547	-13.39	4.3568e-12	3.1256e-10	17.826	4.4304	4.5748	3.779	3.7227	3.3311	3.2904
TPST2	0.71745	6.6669	13.365	4.5166e-12	3.2279e-10	17.552	6.2211	6.2278	6.8706	6.7942	6.9819	6.9057
CLK3	-0.73921	6.0254	-13.358	4.5651e-12	3.2501e-10	17.572	6.4783	6.3988	5.9492	5.9224	5.7322	5.6714
INSIG1	-0.71143	6.8381	-13.346	4.6439e-12	3.2936e-10	17.488	7.1356	7.244	6.8039	6.8921	6.4468	6.5061
STAT5A	0.58222	8.3061	13.343	4.6661e-12	3.2969e-10	17.387	7.9368	7.9749	8.4325	8.4144	8.5647	8.5133
TESPA1	1.4133	3.9344	13.303	4.9541e-12	3.4872e-10	17.692	2.9553	3.0688	4.3401	4.4017	4.3843	4.4565
ST6GALNAC1	-0.83832	5.4622	-13.276	5.1563e-12	3.6158e-10	17.505	5.9539	5.9126	5.4355	5.2871	5.0584	5.1254
DDIT4	-0.54361	9.3065	-13.263	5.2551e-12	3.6713e-10	17.193	9.5821	9.5726	9.3446	9.2708	9.0581	9.0111
KIT	0.71051	8.8188	13.256	5.3107e-12	3.6963e-10	17.224	8.3994	8.3326	8.9547	9.0792	8.9886	9.1585
HMGCS1	0.60051	8.1018	13.232	5.5013e-12	3.8147e-10	17.232	7.7514	7.7263	8.1844	8.2706	8.3327	8.3455
KLHDC8A	-1.4304	3.5033	-13.226	5.5511e-12	3.835e-10	17.591	4.3115	4.2006	3.5043	3.3073	2.9848	2.7116
FAM214B	-0.90794	4.8608	-13.195	5.8149e-12	4.0024e-10	17.45	5.2962	5.4266	4.7714	4.7657	4.4471	4.4577
ZC3H6	-1.2217	3.9664	-13.191	5.8537e-12	4.0143e-10	17.527	4.6215	4.604	3.7573	4.0155	3.4584	3.3415
IL4R	1.1308	4.3591	13.163	6.1072e-12	4.1728e-10	17.489	3.704	3.6712	4.5768	4.5626	4.834	4.8061
IKZF2	2.8722	2.3614	13.159	6.1414e-12	4.1809e-10	16.551	0.57305	0.71868	2.8485	2.9674	3.6196	3.4411
GFOD1	-0.86928	4.845	-13.155	6.1726e-12	4.1868e-10	17.385	5.4137	5.3511	4.6256	4.6523	4.5156	4.5116
CLCN2	-0.99167	4.8613	-13.135	6.3685e-12	4.3041e-10	17.352	5.3866	5.5165	4.7606	4.5702	4.5322	4.4017
HMGN4	0.80093	5.5866	13.131	6.3991e-12	4.3091e-10	17.309	5.1652	5.1178	5.678	5.6727	5.9478	5.9381
ERO1A	0.81274	5.5836	13.116	6.5505e-12	4.3952e-10	17.289	5.1099	5.0957	5.7009	5.7638	5.9145	5.9165
PPP2R5B	-1.0571	4.2047	-13.11	6.6108e-12	4.4198e-10	17.383	4.821	4.829	4.1022	3.9315	3.8035	3.7409
BEX1	-1.7708	2.4257	-13.103	6.6783e-12	4.4489e-10	17.272	3.4554	3.4795	2.0442	2.2021	1.6274	1.7459
FBXL19	0.88612	5.1254	13.093	6.7751e-12	4.4973e-10	17.308	4.6377	4.6208	5.2221	5.241	5.5135	5.5172
RAD23A	-0.57758	7.8508	-13.077	6.9485e-12	4.5961e-10	16.997	8.1589	8.1917	7.7751	7.7822	7.6182	7.579
ARRDC3	-0.91865	5.2876	-13.048	7.253e-12	4.7806e-10	17.182	5.6723	5.8264	5.1949	5.3648	4.8658	4.8013
NDRG1	-1.0065	4.4313	-13.032	7.437e-12	4.8846e-10	17.252	5.0033	4.8637	4.4224	4.4381	3.9493	3.911
H1F0	-0.69979	6.0957	-13.015	7.6292e-12	4.9932e-10	17.04	6.4886	6.4922	6.0365	5.9729	5.8127	5.7714
SPRED1	0.98263	4.8713	13.005	7.7453e-12	5.0515e-10	17.211	4.297	4.1846	5.1355	5.1629	5.2221	5.2256
SLC16A1	0.6666	7.875	12.999	7.8089e-12	5.0753e-10	16.887	7.475	7.5105	7.9205	8.0305	8.097	8.2166
DAPK1	0.8541	5.6185	12.982	8.018e-12	5.1931e-10	17.083	5.1652	5.0344	5.851	5.7494	5.9711	5.9399
YOD1	-0.66605	6.7122	-12.961	8.2692e-12	5.3372e-10	16.904	7.0544	7.0743	6.6402	6.712	6.3573	6.4348
AGRN	-0.93648	5.8853	-12.912	8.9138e-12	5.7334e-10	16.9	6.4544	6.3615	5.9064	5.6334	5.558	5.3982
TMEM233	-2.0793	1.9215	-12.908	8.9723e-12	5.7512e-10	16.795	3.174	3.0758	1.4912	1.6824	1.0941	1.0116
SLC25A42	-0.96107	4.4205	-12.89	9.21e-12	5.8834e-10	17.031	4.9525	4.9741	4.3488	4.2462	3.9908	4.0108
GM2A	0.73909	6.1888	12.877	9.3953e-12	5.9812e-10	16.847	5.7424	5.8223	6.2129	6.3124	6.5262	6.5167
PLEKHA2	1.9608	3.5604	12.858	9.6738e-12	6.1376e-10	16.96	2.196	2.3956	3.9725	4.302	4.1905	4.306
TP73-AS1	-0.76536	7.0935	-12.848	9.8229e-12	6.2111e-10	16.694	7.5741	7.4992	7.0746	6.8643	6.8315	6.7173
TMEM123	0.87252	5.6237	12.829	1.0118e-11	6.3762e-10	16.848	5.0069	5.1544	5.821	5.8629	5.8896	6.0077
CFL1	0.55474	8.3902	12.821	1.0238e-11	6.4298e-10	16.571	8.0594	8.0925	8.4349	8.4936	8.6245	8.6364
ASAP1	-0.71123	6.5979	-12.799	1.0585e-11	6.6253e-10	16.657	7.0855	6.9532	6.5137	6.4146	6.3385	6.2816
CTNNBL1	0.72885	6.0025	12.792	1.071e-11	6.6812e-10	16.735	5.6046	5.5569	6.1274	6.1094	6.2865	6.3304
EZH1	-0.86241	6.3759	-12.774	1.1002e-11	6.8188e-10	16.637	6.8938	6.8421	6.4054	6.1042	5.9929	6.0168
PPP1R15A	-0.82155	8.2272	-12.772	1.1031e-11	6.8188e-10	16.494	8.7187	8.6642	8.282	7.9582	7.8747	7.8655
SNHG25	-0.96359	5.2802	-12.772	1.104e-11	6.8188e-10	16.756	5.8897	5.6262	5.3172	5.2458	4.8566	4.7454
ALAD	-0.75537	6.1814	-12.766	1.1145e-11	6.8609e-10	16.643	6.574	6.6359	6.1806	6.0013	5.831	5.8655
FAM117A	-0.65111	6.5858	-12.749	1.1438e-11	7.0184e-10	16.582	6.9019	6.9664	6.554	6.5242	6.3074	6.2611
RSRP1	-0.83511	7.6652	-12.721	1.1939e-11	7.3018e-10	16.45	8.1587	8.1409	7.6627	7.391	7.4105	7.2275
ITPK1	0.68755	6.4623	12.713	1.2094e-11	7.3719e-10	16.559	6.0477	6.1029	6.5273	6.5672	6.7995	6.7295
FECH	-0.57545	8.2597	-12.683	1.2664e-11	7.6942e-10	16.35	8.5908	8.6086	8.1058	8.207	7.9957	8.0504
TMEM74B	-1.1939	3.9536	-12.664	1.3023e-11	7.887e-10	16.726	4.5451	4.6561	3.9381	3.7385	3.5264	3.3175
SLC30A10	-1.9898	2.1016	-12.64	1.352e-11	8.1614e-10	16.47	3.0756	3.2887	1.9245	1.9227	1.247	1.1509
IGFBP4	2.9059	2.3968	12.628	1.378e-11	8.2913e-10	15.799	0.27497	0.85457	3.0549	3.2705	3.4338	3.4921
PREX1	1.331	4.1483	12.623	1.3885e-11	8.3277e-10	16.681	3.5066	3.3007	4.3861	4.2094	4.8164	4.6706
ASAH1	-0.58659	7.4898	-12.597	1.4455e-11	8.6418e-10	16.269	7.8163	7.8242	7.4007	7.4336	7.1953	7.2685
HSP90B1	0.54738	8.4246	12.589	1.4629e-11	8.7181e-10	16.2	8.1123	8.138	8.4397	8.5121	8.6785	8.667
ELL2	-0.66012	6.46	-12.583	1.4777e-11	8.778e-10	16.329	6.8513	6.8158	6.3521	6.3991	6.1287	6.2132
PYGL	1.0827	4.7106	12.58	1.4847e-11	8.7917e-10	16.572	3.9608	4.1618	4.9019	4.965	5.0721	5.2017
BRI3BP	0.79516	5.9164	12.555	1.5438e-11	9.1127e-10	16.373	5.4921	5.4483	5.9357	6.0946	6.2361	6.2916
TANC1	0.96977	5.4143	12.549	1.5584e-11	9.1701e-10	16.437	4.9745	4.6838	5.6238	5.6109	5.7415	5.8512
BTN3A2	1.0027	4.8358	12.545	1.5664e-11	9.1883e-10	16.5	4.3028	4.1846	5.0505	4.9945	5.1784	5.3043
VAV1	1.3908	3.7313	12.536	1.5893e-11	9.2929e-10	16.543	2.8159	2.9296	4.006	4.114	4.248	4.2745
CORO1B	0.85922	5.1908	12.522	1.6231e-11	9.461e-10	16.417	4.6492	4.7041	5.3625	5.3633	5.4966	5.5689
NACC1	0.66644	6.5404	12.517	1.6358e-11	9.5052e-10	16.238	6.1447	6.2318	6.5715	6.5829	6.8823	6.8293
DDI2	-0.62789	6.9196	-12.509	1.6586e-11	9.6079e-10	16.171	7.3195	7.2284	6.8118	6.8661	6.6353	6.6562
SLC38A1	0.74149	5.7945	12.487	1.7148e-11	9.9026e-10	16.28	5.3435	5.3852	5.9093	5.9209	6.0752	6.1325
TUBB1	-1.8968	2.2181	-12.473	1.7522e-11	1.0087e-09	16.249	3.1866	3.1635	2.294	2.1079	1.2789	1.278
NIN	0.99689	4.6352	12.404	1.9535e-11	1.1212e-09	16.301	4.0184	4.0209	4.8205	4.9162	5.027	5.0079
ATG4A	-0.74865	5.5712	-12.395	1.9801e-11	1.1298e-09	16.122	5.9136	6.0375	5.5088	5.5172	5.2098	5.2405
CD82	0.58895	7.3504	12.395	1.9806e-11	1.1298e-09	15.972	6.9633	7.0007	7.5203	7.4754	7.5841	7.5588
SHARPIN	-0.6633	6.689	-12.376	2.0399e-11	1.1577e-09	15.979	7.0557	7.0493	6.6301	6.6126	6.4656	6.321
SLC39A14	1.168	4.4727	12.372	2.054e-11	1.1577e-09	16.265	3.8658	3.7988	4.4659	4.6923	5.0675	4.9457
PTPN6	1.0546	4.5087	12.372	2.0542e-11	1.1577e-09	16.263	3.7851	3.9657	4.7363	4.7027	4.9549	4.9078
WT1	0.91765	5.1388	12.372	2.0543e-11	1.1577e-09	16.184	4.683	4.5425	5.2093	5.3406	5.5	5.5576
IQSEC1	-0.71101	6.3218	-12.36	2.0913e-11	1.175e-09	15.982	6.7885	6.7195	6.2414	6.0897	6.0854	6.006
AMIGO2	1.6809	3.3674	12.336	2.1727e-11	1.217e-09	16.184	2.3499	2.3036	3.7573	3.8043	3.8963	4.0932
HMBS	-0.68964	8.1747	-12.299	2.3036e-11	1.2865e-09	15.742	8.5999	8.4732	8.0911	8.1977	7.7534	7.933
MPP1	-0.53999	8.3359	-12.284	2.3576e-11	1.3059e-09	15.708	8.5934	8.6439	8.2864	8.3366	8.0494	8.1055
EHBP1L1	-0.60818	7.6085	-12.284	2.3593e-11	1.3059e-09	15.755	7.9717	7.9698	7.5181	7.4603	7.4324	7.2988
CLIC1	0.61394	8.0694	12.284	2.3594e-11	1.3059e-09	15.736	7.6646	7.7379	8.1504	8.2379	8.2562	8.3693
DDIT3	-0.78317	5.4185	-12.28	2.3731e-11	1.3097e-09	15.957	5.8906	5.7642	5.3711	5.4049	4.9938	5.0865
ANO6	0.93406	4.7766	12.272	2.4033e-11	1.3224e-09	16.073	4.2646	4.1618	4.9847	4.9525	5.1517	5.1445
FXYD5	0.76696	5.5823	12.246	2.5068e-11	1.3753e-09	15.923	5.1443	5.0767	5.7763	5.7376	5.9024	5.8563
FAM49A	1.1114	4.2098	12.233	2.5586e-11	1.3996e-09	16.064	3.5706	3.648	4.2402	4.3542	4.7483	4.6977
ATP2B4	-0.53293	8.2163	-12.191	2.7317e-11	1.4899e-09	15.561	8.5755	8.4983	8.0991	8.1163	8.0109	7.9979
SPATC1L	-1.1143	3.7103	-12.177	2.7949e-11	1.5199e-09	15.98	4.3287	4.3081	3.5953	3.6409	3.1317	3.2571
FHDC1	-0.73338	5.9665	-12.168	2.8356e-11	1.5357e-09	15.705	6.5076	6.3195	5.7999	5.8094	5.6884	5.674
PHACTR2	0.71619	6.4379	12.167	2.8404e-11	1.5357e-09	15.693	6.0082	5.953	6.6187	6.6614	6.6206	6.7657
BTAF1	-0.54822	8.1811	-12.137	2.9786e-11	1.6058e-09	15.477	8.489	8.4677	8.183	8.0854	7.9485	7.9134
CDKN1A	-1.1457	3.6255	-12.129	3.0152e-11	1.6208e-09	15.912	4.2253	4.142	3.6482	3.6624	3.0323	3.0429
SCARNA2	-0.52904	8.8344	-12.093	3.1971e-11	1.7137e-09	15.365	9.0839	8.989	8.9293	8.9893	8.5032	8.5115
IER5	-0.83524	6.6081	-12.077	3.2767e-11	1.7513e-09	15.499	7.1429	6.985	6.6408	6.4118	6.3195	6.1489
VMP1	0.58524	7.1656	12.065	3.3436e-11	1.7819e-09	15.449	6.7983	6.8241	7.3096	7.2671	7.4188	7.3759
LTBP1	-0.99829	4.0058	-12.037	3.4941e-11	1.8569e-09	15.724	4.5957	4.6631	3.7083	3.8171	3.5881	3.6627
CMPK2	0.87651	5.5092	12.032	3.5234e-11	1.8671e-09	15.591	5.0933	4.8495	5.7413	5.6798	5.8011	5.8906
NF2	0.56568	7.3117	11.945	4.0532e-11	2.1418e-09	15.236	6.9656	7.0238	7.3706	7.3901	7.5538	7.5662
NCF4	1.4215	3.6188	11.942	4.07e-11	2.1446e-09	15.617	2.783	2.7053	3.9687	3.9038	4.254	4.0979
FER	0.80098	5.2425	11.903	4.3355e-11	2.2742e-09	15.408	4.8047	4.7353	5.412	5.364	5.5466	5.5924
BIN2	1.1449	4.0048	11.903	4.3405e-11	2.2742e-09	15.553	3.3583	3.2706	4.2433	4.2399	4.4471	4.4699
RP11-700H6.1	-1.2346	3.539	-11.899	4.3671e-11	2.276e-09	15.545	4.2882	4.1016	3.3618	3.5389	3.037	2.9065
TNIK	0.87497	4.9663	11.898	4.3713e-11	2.276e-09	15.439	4.5003	4.4109	5.1588	5.0624	5.3514	5.3138
TRIM32	0.74598	5.6247	11.897	4.3805e-11	2.276e-09	15.344	5.1652	5.2078	5.7043	5.8057	5.9372	5.928
CAPG	1.5532	3.3554	11.893	4.4092e-11	2.2846e-09	15.498	2.3721	2.243	3.8709	3.9335	3.8198	3.893
SEMA6B	-1.7685	2.3475	-11.886	4.4555e-11	2.3022e-09	15.435	3.1548	3.4422	2.2069	2.2215	1.538	1.5215
EMILIN2	1.1445	4.0897	11.871	4.5656e-11	2.3467e-09	15.494	3.3859	3.5612	4.1696	4.175	4.6783	4.5681
VASP	0.65837	6.5317	11.87	4.5751e-11	2.3467e-09	15.188	6.0785	6.2216	6.6181	6.6551	6.8203	6.7969
SGK223	1.1677	4.1063	11.869	4.5795e-11	2.3467e-09	15.494	3.4554	3.3929	4.3832	4.2319	4.5421	4.6322
MXD3	-1.0335	4.0791	-11.859	4.6582e-11	2.3806e-09	15.437	4.6492	4.5919	3.9497	4.0842	3.6865	3.5134
EXTL3	0.62299	6.4906	11.834	4.8481e-11	2.4708e-09	15.129	6.1342	6.1753	6.5079	6.5713	6.7767	6.7784
MALAT1	-0.66848	12.835	-11.832	4.8668e-11	2.4736e-09	14.725	13.312	13.047	12.814	12.819	12.428	12.591
SCARNA9	-0.7147	5.9381	-11.818	4.9823e-11	2.5254e-09	15.139	6.3276	6.2725	5.9482	5.897	5.6727	5.5107
PDIA4	0.66175	6.1734	11.801	5.1156e-11	2.586e-09	15.114	5.8103	5.7728	6.2429	6.3105	6.4287	6.4754
PLK2	-0.93135	4.4795	-11.773	5.3607e-11	2.7025e-09	15.248	4.9395	4.9778	4.4766	4.4032	4.1371	3.9427
C17orf99	-2.2718	1.8048	-11.768	5.4022e-11	2.7161e-09	15.003	3.0823	2.8342	1.794	1.8246	0.39255	0.90113
CSF1	1.2394	3.9019	11.763	5.4494e-11	2.7325e-09	15.334	3.0412	3.1503	4.2864	4.2509	4.3953	4.2869
HEXIM1	-0.89055	6.2436	-11.748	5.5816e-11	2.7913e-09	14.988	6.8197	6.6134	6.3433	6.035	5.8045	5.8456
REXO2	-0.55747	7.0048	-11.731	5.7379e-11	2.8618e-09	14.891	7.3041	7.319	6.9379	6.9611	6.7414	6.7654
CHST2	-0.80167	4.8869	-11.708	5.9548e-11	2.962e-09	15.087	5.305	5.3103	4.8658	4.8155	4.5697	4.4553
ULK1	-0.82733	5.0823	-11.704	5.999e-11	2.976e-09	15.048	5.5832	5.519	5.027	4.8983	4.8178	4.6483
HMOX1	-0.85827	4.6305	-11.694	6.097e-11	3.0167e-09	15.094	5.0403	5.1741	4.5643	4.5004	4.2799	4.2238
SLC7A11	-0.63058	6.7291	-11.663	6.4115e-11	3.1639e-09	14.802	7.127	6.9878	6.7249	6.6843	6.395	6.4557
CISH	-0.59867	7.1432	-11.643	6.6299e-11	3.263e-09	14.731	7.537	7.3958	7.1059	7.0861	6.8492	6.885
TUBG1	-0.58029	6.9912	-11.613	6.9662e-11	3.4121e-09	14.691	7.2796	7.3836	6.8792	6.9009	6.7686	6.7353
UHRF1	0.68129	6.0256	11.612	6.9694e-11	3.4121e-09	14.813	5.7001	5.6131	6.0393	6.1271	6.318	6.3562
RNF139-AS1	-0.96654	4.28	-11.601	7.0967e-11	3.4653e-09	14.987	4.8047	4.7998	4.2743	4.107	3.9294	3.7648
CPOX	-0.5682	7.2855	-11.595	7.1679e-11	3.4858e-09	14.638	7.6638	7.5514	7.2003	7.2198	7.026	7.0519
PPM1H	0.71989	5.8849	11.595	7.176e-11	3.4858e-09	14.801	5.4231	5.5791	5.9444	5.9175	6.2598	6.1854
SOAT1	0.96605	4.8332	11.554	7.6769e-11	3.7194e-09	14.89	4.4063	4.142	4.9274	5.0444	5.2159	5.2631
MOSPD1	-0.88563	4.5575	-11.552	7.7045e-11	3.7231e-09	14.866	5.0899	5.0109	4.3719	4.5498	4.1306	4.1919
GADD45A	-0.9003	4.657	-11.549	7.7449e-11	3.733e-09	14.852	5.1182	5.1059	4.6935	4.5752	4.3264	4.1228
MEST	0.72601	5.7718	11.545	7.7911e-11	3.7456e-09	14.733	5.377	5.3625	5.7817	5.9209	6.069	6.1195
TP53INP1	-0.60381	6.7398	-11.533	7.951e-11	3.8012e-09	14.58	7.1135	6.9915	6.7405	6.6959	6.4464	6.4511
SNAI1	-1.3571	3.5673	-11.532	7.9534e-11	3.8012e-09	14.944	4.3569	4.2752	3.6002	3.2005	3.1491	2.8218
IRF1	-0.66776	5.6628	-11.531	7.968e-11	3.8012e-09	14.687	6.0091	6.0579	5.5749	5.598	5.4039	5.3332
LRP1	-1.7219	2.5166	-11.504	8.3323e-11	3.9648e-09	14.861	3.3471	3.404	2.7196	2.3027	1.7232	1.6032
WIPI1	-0.77195	5.0226	-11.489	8.5475e-11	4.0569e-09	14.699	5.435	5.4442	4.888	5.0307	4.6798	4.6579
PTPN22	1.2703	3.9573	11.484	8.619e-11	4.0805e-09	14.878	3.1223	3.1569	4.2864	4.3818	4.3014	4.495
PISD	-0.61096	6.5144	-11.466	8.8837e-11	4.1951e-09	14.488	6.8167	6.8101	6.5746	6.4762	6.2392	6.1699
METTL12	-0.94723	5.5999	-11.446	9.1771e-11	4.3228e-09	14.551	6.2973	5.9117	5.4971	5.5711	5.1889	5.1331
PAQR9	-2.1581	1.9027	-11.431	9.4104e-11	4.4215e-09	14.557	3.174	2.8259	2.0298	1.7374	0.7057	0.94357
CD36	-0.45706	9.7422	-11.427	9.4804e-11	4.4432e-09	14.184	9.9748	9.9941	9.6777	9.7534	9.5034	9.5498
ELF1	0.57877	6.6617	11.424	9.5304e-11	4.4554e-09	14.42	6.3297	6.3195	6.7543	6.7617	6.8859	6.9193
RGS2	-1.076	3.7683	-11.416	9.644e-11	4.4972e-09	14.747	4.1692	4.2932	3.9649	3.8734	3.1534	3.1555
TSPAN17	-0.51078	7.6979	-11.406	9.8155e-11	4.5614e-09	14.282	8.0083	8.0144	7.5723	7.5889	7.5277	7.4758
KLHL24	-0.64829	5.6722	-11.405	9.8305e-11	4.5614e-09	14.473	6.0162	6.0204	5.6056	5.6496	5.3793	5.3622
HPS1	-0.56285	6.9188	-11.375	1.0332e-10	4.7752e-09	14.293	7.2573	7.2076	6.8426	6.8623	6.7074	6.6358
ADIPOR1	-0.61126	6.8689	-11.375	1.0342e-10	4.7752e-09	14.297	7.1238	7.2769	6.8128	6.8255	6.559	6.6154
PTPN9	1.2609	3.8	11.351	1.0758e-10	4.9547e-09	14.661	2.9845	3.1765	3.9912	3.9472	4.433	4.2676
PFKP	0.67142	5.9084	11.348	1.0807e-10	4.9649e-09	14.38	5.5047	5.5494	6.0384	5.9581	6.2275	6.1725
CST3	0.67809	6.0908	11.344	1.0885e-10	4.9887e-09	14.354	5.6314	5.7148	6.1872	6.3105	6.346	6.3552
ABCB10	-0.49661	8.1018	-11.323	1.1273e-10	5.1537e-09	14.112	8.3925	8.3639	8.0153	8.077	7.8718	7.8906
CDK15	1.2432	3.8157	11.317	1.1383e-10	5.1891e-09	14.604	3.1803	3.0406	4.0849	3.8897	4.3072	4.3916
TBC1D4	0.56394	6.8403	11.316	1.1406e-10	5.1891e-09	14.216	6.5151	6.5244	6.9412	6.8923	7.0951	7.0733
TMEM140	-2.4787	1.0563	-11.303	1.1652e-10	5.2883e-09	13.936	2.3941	2.5133	0.86888	0.63009	-0.087064	0.018267
DIAPH1	0.65572	6.992	11.293	1.1863e-10	5.371e-09	14.164	6.7314	6.5071	7.0829	7.0775	7.2996	7.2537
TMEM63B	-0.63819	6.2845	-11.282	1.2083e-10	5.4572e-09	14.189	6.6437	6.6697	6.2492	6.1029	6.0546	5.9867
GYPE	-0.89787	4.5596	-11.28	1.2114e-10	5.4582e-09	14.409	5.1	4.9871	4.4058	4.5877	4.0795	4.1977
ADD2	-0.47874	8.7114	-11.277	1.2174e-10	5.4718e-09	13.989	9.0223	8.9623	8.6252	8.6333	8.4821	8.5429
ZNF652	-0.88501	4.284	-11.26	1.2538e-10	5.6219e-09	14.408	4.8411	4.7353	4.1125	4.2013	3.9319	3.8822
EPB41	-0.47911	8.4977	-11.208	1.3679e-10	6.1188e-09	13.884	8.7488	8.7895	8.4038	8.4652	8.2785	8.3006
ARHGAP4	0.63646	6.3984	11.187	1.4189e-10	6.3319e-09	14.04	6.0734	6.0123	6.5227	6.4185	6.7212	6.642
C1orf186	1.2476	3.5504	11.163	1.4763e-10	6.5722e-09	14.353	2.8401	2.8176	3.6946	3.7957	4.0817	4.0727
USP15	-0.47218	8.571	-11.159	1.4858e-10	6.5985e-09	13.794	8.8522	8.8336	8.519	8.4823	8.3406	8.3986
RHOH	1.1765	3.934	11.155	1.4959e-10	6.6279e-09	14.326	3.1091	3.3475	4.2149	4.138	4.3453	4.4491
TMEM14C	-0.56833	7.9572	-11.116	1.5989e-10	7.0676e-09	13.765	8.2643	8.2134	7.9285	8.0024	7.589	7.7453
ZBTB4	-0.63748	5.6098	-11.093	1.6619e-10	7.3287e-09	13.94	5.9483	6.0068	5.5088	5.5139	5.3486	5.3326
RP13-20L14.10	-1.6125	2.6147	-11.077	1.7082e-10	7.5148e-09	14.191	3.6819	3.2827	2.4321	2.5376	1.9078	1.8463
AP1S1	0.82505	4.8364	11.063	1.7506e-10	7.6831e-09	14.052	4.368	4.2661	5.0629	5.038	5.1311	5.1521
ALDH3B1	-0.57725	6.4257	-11.06	1.7597e-10	7.7049e-09	13.794	6.6883	6.7558	6.4351	6.3844	6.1552	6.1352
DENND4A	-0.53627	7.1683	-11.056	1.7715e-10	7.7251e-09	13.718	7.5005	7.4427	7.0877	7.1115	6.8984	6.9689
KLF13	-0.53921	7.2654	-11.056	1.7726e-10	7.7251e-09	13.707	7.5789	7.6183	7.0934	7.1805	7.0906	7.0309
SLC35F6	0.83753	4.8617	11.046	1.8008e-10	7.83e-09	14.02	4.2853	4.4026	5.0143	5.1066	5.1805	5.1812
CAP1	0.58543	7.6394	11.028	1.8584e-10	8.0617e-09	13.647	7.2351	7.3193	7.7118	7.8489	7.818	7.9032
RAB6B	-0.65262	6.0622	-11.022	1.8779e-10	8.127e-09	13.764	6.4751	6.355	6.0722	5.9484	5.7387	5.7837
STAP1	1.2697	3.6376	11.009	1.9183e-10	8.283e-09	14.094	2.9404	2.7495	3.879	4.021	4.1328	4.1026
FKBPL	-0.75396	4.9894	-11.006	1.9302e-10	8.315e-09	13.87	5.3687	5.4854	4.9274	4.8145	4.6466	4.6935
ATF3	-0.88457	4.4772	-10.996	1.9631e-10	8.4373e-09	13.931	5.0105	4.8896	4.516	4.3246	4.0265	4.0964
RNF144A	0.68275	6.146	10.987	1.9938e-10	8.5339e-09	13.729	5.7867	5.6497	6.2708	6.3715	6.3526	6.445
GALM	0.66884	5.7992	10.987	1.9947e-10	8.5339e-09	13.771	5.3715	5.4143	5.9201	5.972	6.0156	6.102
LRRC75A	-1.6485	2.1202	-10.976	2.0331e-10	8.6783e-09	13.947	3.006	3.0118	2.0298	1.954	1.3556	1.3638
FAM210B	-0.53303	7.3831	-10.973	2.0409e-10	8.6914e-09	13.556	7.6733	7.6681	7.2836	7.3977	7.1416	7.1342
MEGF8	0.75136	5.2493	10.969	2.0549e-10	8.7311e-09	13.819	4.8331	4.7998	5.3582	5.3597	5.6293	5.5154
APOL6	-0.64121	6.0428	-10.966	2.0681e-10	8.7673e-09	13.668	6.4287	6.3283	5.9482	6.0769	5.7351	5.7397
HBQ1	-0.80573	4.5542	-10.957	2.0979e-10	8.8737e-09	13.856	4.9872	4.9344	4.5543	4.5266	4.2092	4.1135
RCSD1	0.74137	5.1931	10.944	2.1478e-10	9.0638e-09	13.784	4.7376	4.7679	5.3217	5.3494	5.4545	5.5277
CDKN2B	-0.76082	5.463	-10.938	2.1666e-10	9.1228e-09	13.694	5.8525	5.8326	5.5699	5.3487	5.1442	5.0302
SLC50A1	-0.61851	5.8063	-10.935	2.1782e-10	9.151e-09	13.646	6.1095	6.1114	5.8126	5.8264	5.4527	5.5253
ARMCX1	1.583	3.1012	10.931	2.1948e-10	9.1999e-09	13.936	2.0653	2.2917	3.3733	3.3283	3.8756	3.6732
RAB3IL1	-0.80529	4.5747	-10.925	2.2167e-10	9.2708e-09	13.788	5.0966	5.0055	4.4389	4.4298	4.1779	4.2993
ARRDC4	-0.64061	5.6047	-10.923	2.2238e-10	9.2797e-09	13.648	5.9221	5.9454	5.5587	5.6207	5.2635	5.3179
CAPN5	-1.1473	3.4383	-10.913	2.2633e-10	9.4236e-09	13.914	3.9971	4.0566	3.3618	3.4151	3.0276	2.7717
MEX3D	0.95929	4.4163	10.908	2.282e-10	9.48e-09	13.838	3.9718	3.8321	4.4925	4.4628	4.94	4.7984
CYBRD1	-0.61977	6.795	-10.892	2.3489e-10	9.7366e-09	13.459	7.0796	7.2151	6.6455	6.779	6.4892	6.5614
MPV17L	1.985	2.3878	10.886	2.3713e-10	9.8076e-09	13.664	1.1897	1.3213	2.7015	2.6081	3.3387	3.1675
MBOAT7	0.60906	5.9902	10.865	2.4585e-10	1.0146e-08	13.523	5.66	5.666	6.0311	6.0373	6.2953	6.2513
FLCN	-0.61036	6.429	-10.863	2.4656e-10	1.0153e-08	13.442	6.8572	6.7273	6.3433	6.2765	6.2275	6.1421
CSK	0.65598	5.6618	10.854	2.5061e-10	1.0296e-08	13.55	5.2845	5.3177	5.6906	5.7638	5.9576	5.9564
ALS2	0.50107	7.7251	10.851	2.5175e-10	1.0321e-08	13.322	7.4672	7.4531	7.7489	7.7619	7.9222	7.9972
SESN2	-0.65353	5.4446	-10.848	2.5334e-10	1.0363e-08	13.536	5.7867	5.7738	5.4545	5.3936	5.1582	5.1007
MYB	0.463	8.6269	10.834	2.5926e-10	1.0569e-08	13.226	8.3838	8.3191	8.7057	8.7253	8.7954	8.8323
RYR3	1.6598	3.8127	10.834	2.5951e-10	1.0569e-08	13.793	2.9404	2.8342	4.2804	3.7136	4.6079	4.4998
IFRD1	-0.69428	5.6723	-10.784	2.8278e-10	1.1491e-08	13.391	6.1062	5.9801	5.6986	5.5444	5.3857	5.3185
CNKSR3	0.51054	7.4601	10.783	2.8358e-10	1.1491e-08	13.224	7.1413	7.1884	7.5345	7.543	7.7076	7.6457
GMIP	1.1369	3.985	10.782	2.84e-10	1.1491e-08	13.676	3.3414	3.3816	4.017	4.1931	4.4043	4.5726
CTSS	1.2223	3.6587	10.778	2.8606e-10	1.1549e-08	13.698	2.9479	2.8827	3.8464	4.0099	4.093	4.1727
SDC4	-0.76113	4.8571	-10.776	2.8711e-10	1.1567e-08	13.487	5.3064	5.2515	4.6935	4.8492	4.547	4.495
GTPBP2	-0.5766	7.3852	-10.76	2.9506e-10	1.1861e-08	13.174	7.7492	7.6981	7.3573	7.2069	7.2031	7.0963
H1FX	-0.90156	5.8511	-10.74	3.0528e-10	1.2246e-08	13.289	6.3572	6.3077	5.971	5.5918	5.5409	5.3379
CCND1	0.67569	5.8329	10.736	3.0754e-10	1.231e-08	13.321	5.4244	5.455	5.9201	5.9585	6.1897	6.0496
PRMT5	0.55683	6.8262	10.731	3.105e-10	1.2402e-08	13.188	6.5442	6.5091	6.8291	6.9109	7.0513	7.1128
2019-03-08	-0.55681	6.4278	-10.723	3.1468e-10	1.2542e-08	13.197	6.7065	6.7345	6.3694	6.4265	6.1892	6.1409
FAM65A	-0.82741	5.3932	-10.709	3.222e-10	1.2814e-08	13.287	5.9921	5.7717	5.2948	5.1687	5.1773	4.9544
YPEL5	-0.72931	5.2391	-10.703	3.2589e-10	1.2934e-08	13.305	5.6371	5.6178	5.1304	5.2677	4.8178	4.9639
BTG1	-0.83716	5.3551	-10.681	3.3863e-10	1.3411e-08	13.246	5.881	5.7566	5.4245	5.0996	5.0093	4.9596
DIP2B	0.54782	6.5947	10.657	3.5284e-10	1.3944e-08	13.083	6.2981	6.2419	6.6915	6.7005	6.8227	6.8136
VPS18	0.82141	4.6524	10.656	3.5391e-10	1.3957e-08	13.356	4.1692	4.2259	4.7341	4.7413	5.0572	4.9869
UBE2H	-0.63718	5.5368	-10.651	3.5694e-10	1.4046e-08	13.169	5.8436	5.9454	5.4639	5.4509	5.2774	5.2398
PER1	-0.68749	5.8114	-10.647	3.593e-10	1.411e-08	13.124	6.2477	6.1737	5.7817	5.6078	5.5957	5.4617
STAM	-0.53539	6.456	-10.644	3.6153e-10	1.4167e-08	13.049	6.7629	6.7703	6.3615	6.3776	6.2402	6.2232
TUBA4A	-0.75338	4.8418	-10.64	3.6373e-10	1.4215e-08	13.249	5.3136	5.2014	4.7003	4.8272	4.4987	4.5092
SPIRE1	1.4321	3.098	10.639	3.6427e-10	1.4215e-08	13.453	2.1321	2.4503	3.2788	3.2797	3.7362	3.7105
HIST1H2BN	-0.47504	7.8198	-10.636	3.6662e-10	1.4277e-08	12.919	8.0727	8.0983	7.791	7.735	7.6191	7.6025
ITPR1	0.79106	5.0607	10.631	3.6942e-10	1.4356e-08	13.254	4.6605	4.5298	5.2331	5.177	5.323	5.4408
GAPDH	0.40706	10.87	10.624	3.7428e-10	1.4514e-08	12.71	10.619	10.659	10.888	10.961	11.019	11.072
HES6	-0.56371	8.1467	-10.592	3.9593e-10	1.5322e-08	12.815	8.4721	8.4423	8.115	8.0548	7.9984	7.7974
MOB1B	-0.62201	6.8031	-10.586	4.0023e-10	1.5434e-08	12.91	7.2547	7.0747	6.6567	6.752	6.4909	6.5898
CCDC18-AS1	-0.94675	4.7118	-10.585	4.0048e-10	1.5434e-08	13.179	5.162	5.1676	4.9157	4.5702	4.3053	4.1502
CTD-2020K17.1	1.6691	2.8593	10.578	4.0543e-10	1.5593e-08	13.304	1.8118	1.8945	3.303	3.0816	3.604	3.4608
HK2	0.68663	5.3181	10.553	4.2406e-10	1.6276e-08	13.071	4.8979	4.8916	5.4626	5.4974	5.5556	5.6035
GALNT7	0.80843	4.665	10.536	4.3647e-10	1.6717e-08	13.145	4.1628	4.2228	4.8078	4.7995	4.9733	5.0236
ATP13A2	0.73311	5.0831	10.533	4.389e-10	1.6776e-08	13.069	4.6052	4.7242	5.1671	5.2074	5.3975	5.397
CNN2	0.61585	6.6429	10.53	4.4113e-10	1.6827e-08	12.851	6.2018	6.3572	6.6903	6.8173	6.9051	6.8857
NPRL3	-0.6703	5.7403	-10.519	4.4993e-10	1.7128e-08	12.904	6.194	6.0508	5.7246	5.5667	5.4562	5.4494
MLC1	0.47154	8.0092	10.504	4.6233e-10	1.7564e-08	12.677	7.6986	7.7437	8.0885	8.1379	8.2096	8.177
TBC1D17	-0.7299	4.838	-10.494	4.7028e-10	1.7829e-08	12.985	5.2801	5.2314	4.7584	4.6923	4.5921	4.4735
TBC1D1	1.0034	4.1339	10.49	4.7356e-10	1.7918e-08	13.145	3.5658	3.5612	4.1794	4.3688	4.5388	4.5894
TUFT1	-1.1824	3.0055	-10.489	4.7496e-10	1.7934e-08	13.199	3.6996	3.6526	2.8152	2.8518	2.5866	2.4275
ASNS	-0.47559	8.454	-10.475	4.862e-10	1.8319e-08	12.583	8.6805	8.7194	8.3939	8.4844	8.1856	8.26
SNHG19	-0.72456	4.7776	-10.473	4.8806e-10	1.8319e-08	12.964	5.1508	5.1312	4.7758	4.7646	4.4645	4.3787
VDAC1	0.56662	6.922	10.473	4.8809e-10	1.8319e-08	12.715	6.5601	6.6424	6.9403	7.0567	7.1343	7.198
SLC25A32	0.7103	5.2856	10.469	4.9132e-10	1.8403e-08	12.918	4.9836	4.8249	5.3157	5.3567	5.6309	5.6018
TSKU	-0.68992	5.0184	-10.468	4.9236e-10	1.8405e-08	12.908	5.4002	5.4867	4.8246	4.8983	4.7225	4.778
EPHB6	0.92988	4.7396	10.466	4.944e-10	1.8444e-08	13.014	4.2586	4.1354	4.9059	4.8616	5.2515	5.0245
ATG2B	-0.63989	6.2974	-10.457	5.0228e-10	1.8684e-08	12.728	6.7086	6.6025	6.3131	6.1241	6.0512	5.985
TMEM57	-0.58733	5.9238	-10.456	5.0284e-10	1.8684e-08	12.769	6.2265	6.2988	5.8366	5.8359	5.6355	5.7093
ZFYVE21	-0.65131	5.5454	-10.451	5.0722e-10	1.881e-08	12.81	5.9012	5.8931	5.5179	5.4557	5.324	5.1804
WIPF1	1.1059	3.7092	10.446	5.1233e-10	1.8961e-08	13.114	2.9845	3.1033	3.942	3.9355	4.113	4.1771
NR1H2	-0.49384	7.292	-10.444	5.1385e-10	1.898e-08	12.612	7.5404	7.6183	7.2103	7.2117	7.094	7.0775
SLC36A1	-0.74227	5.6298	-10.443	5.1528e-10	1.8995e-08	12.774	6.1712	5.9986	5.5737	5.342	5.3875	5.3057
KHNYN	-0.51643	6.9367	-10.441	5.1702e-10	1.9022e-08	12.636	7.2183	7.2586	6.8317	6.8638	6.762	6.6859
DNAJB2	-1.1751	3.3053	-10.417	5.3947e-10	1.9808e-08	13.055	3.9007	4.0459	3.1778	3.1641	2.6118	2.9313
GCLM	-0.58018	6.3084	-10.415	5.4079e-10	1.9818e-08	12.651	6.6855	6.6013	6.1823	6.2605	6.0138	6.1071
FAM83H	1.0046	4.3772	10.414	5.4224e-10	1.9832e-08	12.981	3.743	3.7946	4.5289	4.6283	4.8905	4.6779
SEMA4D	1.3726	3.1095	10.411	5.4527e-10	1.9884e-08	13.057	2.2208	2.2676	3.4619	3.4784	3.5977	3.6305
AP1M1	0.60541	6.0942	10.41	5.458e-10	1.9884e-08	12.693	5.7939	5.749	6.1249	6.1369	6.4367	6.3237
RP11-11M20.4	-1.3015	2.7607	-10.389	5.6656e-10	2.0573e-08	13.029	3.4914	3.3873	2.7897	2.6228	2.1251	2.1479
RAP2B	0.49012	7.3879	10.389	5.669e-10	2.0573e-08	12.516	7.1437	7.0821	7.454	7.44	7.6187	7.5889
LPIN2	-0.5344	6.3311	-10.386	5.6994e-10	2.0643e-08	12.591	6.6551	6.6965	6.1659	6.1843	6.1595	6.1253
GALNT1	0.63878	6.2332	10.384	5.7227e-10	2.0671e-08	12.631	5.8306	5.8999	6.2523	6.4132	6.4621	6.5411
IRAK3	0.91961	4.4568	10.383	5.7292e-10	2.0671e-08	12.906	3.858	3.9917	4.5108	4.6958	4.8286	4.856
ICK	0.88318	4.3964	10.363	5.9421e-10	2.1397e-08	12.871	4.0184	3.8238	4.4686	4.4615	4.7821	4.8242
NRROS	0.68856	5.2698	10.358	5.9873e-10	2.1519e-08	12.725	4.8707	4.8434	5.3683	5.4412	5.5709	5.5242
FZD5	-0.85899	4.1405	-10.344	6.1375e-10	2.2016e-08	12.825	4.6514	4.55	4.1262	4.0192	3.7897	3.7064
GCHFR	-0.67199	5.3389	-10.336	6.2338e-10	2.2318e-08	12.63	5.6869	5.6866	5.3408	5.3054	4.9275	5.0865
ZFAS1	-0.55837	6.8338	-10.331	6.2863e-10	2.2463e-08	12.448	7.1405	7.0963	6.8837	6.757	6.6085	6.5167
PRRT1	-1.1774	3.2564	-10.325	6.3582e-10	2.2668e-08	12.898	3.8737	3.8727	3.356	3.0311	2.7433	2.6616
AC016629.3	-1.0166	3.913	-10.324	6.3678e-10	2.2668e-08	12.815	4.5862	4.4273	3.879	3.6361	3.365	3.5844
DEF6	1.2276	3.5926	10.32	6.416e-10	2.2787e-08	12.902	2.933	2.6872	3.9381	3.9018	4.1152	3.9806
ARPC1B	0.63409	5.6111	10.319	6.4256e-10	2.2787e-08	12.595	5.2668	5.2391	5.6929	5.6879	5.929	5.8507
SLC10A3	-0.59223	5.6758	-10.314	6.4829e-10	2.2946e-08	12.538	5.9903	6.0684	5.5774	5.545	5.4352	5.4384
EIF1	-0.51996	7.8613	-10.311	6.5121e-10	2.3006e-08	12.325	8.2274	8.0637	7.8282	7.7989	7.6031	7.6466
TNK2	-0.69881	5.3474	-10.303	6.6099e-10	2.3307e-08	12.566	5.799	5.6497	5.3625	5.2155	5.0584	4.9995
YES1	0.579	6.1545	10.298	6.6682e-10	2.3468e-08	12.483	5.7939	5.8418	6.2193	6.2815	6.368	6.4224
GRK3	0.73526	4.8646	10.297	6.685e-10	2.3483e-08	12.672	4.4541	4.4808	4.9487	4.9003	5.1931	5.2104
KANK2	-0.5225	6.7282	-10.252	7.242e-10	2.5392e-08	12.31	6.9847	7.0708	6.6759	6.6293	6.4875	6.5208
ANKH	-0.79565	4.3342	-10.247	7.3036e-10	2.5517e-08	12.614	4.857	4.7375	4.2433	4.16	4.017	3.9907
FAM168B	0.55974	6.2475	10.247	7.3051e-10	2.5517e-08	12.375	5.9539	5.9097	6.2982	6.3426	6.4673	6.5135
SLC27A2	0.79062	4.6517	10.238	7.4319e-10	2.5912e-08	12.606	4.1787	4.2101	4.7758	4.7832	4.9437	5.0187
LINC01215	1.9247	2.4008	10.228	7.5687e-10	2.6339e-08	12.576	1.3995	1.037	2.9516	2.7351	3.1141	3.1675
ABHD5	-0.54043	6.1783	-10.227	7.5826e-10	2.6339e-08	12.317	6.4994	6.5013	6.0473	6.1038	5.9434	5.9744
NT5M	-0.68455	4.9222	-10.225	7.6023e-10	2.6358e-08	12.488	5.2519	5.3177	4.8516	4.9152	4.5842	4.6126
SPN	0.46987	8.575	10.218	7.7032e-10	2.6619e-08	12.108	8.239	8.3637	8.6231	8.6828	8.7648	8.7767
PPIB	0.54441	6.9405	10.218	7.7062e-10	2.6619e-08	12.245	6.5667	6.6651	6.991	7.1004	7.1546	7.1651
PPDPF	-0.67406	5.1391	-10.211	7.7924e-10	2.6867e-08	12.432	5.5359	5.428	5.172	5.0847	4.7945	4.8195
ARHGAP15	0.59494	6.0448	10.202	7.9292e-10	2.7288e-08	12.319	5.6588	5.7457	6.0905	6.181	6.286	6.3066
BZW1	0.55646	6.9307	10.199	7.9623e-10	2.7352e-08	12.211	6.5823	6.6518	6.9489	7.0589	7.1239	7.2183
PTDSS1	0.44329	8.2861	10.197	7.9916e-10	2.7402e-08	12.09	8.0359	8.063	8.2873	8.3458	8.4831	8.5016
TCTA	-0.74294	4.5574	-10.192	8.0671e-10	2.761e-08	12.489	4.9395	4.9073	4.6087	4.5292	4.1736	4.186
SMYD2	1.0733	3.7317	10.189	8.1067e-10	2.7695e-08	12.654	3.0272	3.1503	3.9265	3.953	4.2072	4.1258
SAMD9	0.85795	4.4286	10.186	8.1578e-10	2.7818e-08	12.55	3.9534	3.9083	4.5314	4.61	4.7398	4.8289
WDR1	0.48783	7.1588	10.184	8.1811e-10	2.7847e-08	12.161	6.8739	6.8819	7.2091	7.2573	7.3574	7.3733
PPP3CA	0.53397	6.6632	10.179	8.2673e-10	2.8089e-08	12.204	6.3368	6.3151	6.7777	6.8329	6.8241	6.8925
ATAD5	-0.49104	7.0596	-10.174	8.3293e-10	2.8249e-08	12.137	7.3549	7.3164	6.9835	7.0105	6.8751	6.8172
NUCB2	0.62993	7.0464	10.167	8.4479e-10	2.8599e-08	12.146	6.5942	6.6818	7.1348	7.3375	7.2083	7.3218
PAN2	-0.5831	6.3212	-10.146	8.7625e-10	2.961e-08	12.152	6.6883	6.6674	6.2785	6.1011	6.1161	6.076
DNHD1	-0.95428	4.4638	-10.136	8.9253e-10	3.0106e-08	12.394	5.049	4.8975	4.5618	4.2143	4.1108	3.9497
RB1CC1	-0.46342	7.699	-10.13	9.0259e-10	3.039e-08	12.002	7.9767	7.9395	7.6125	7.6772	7.4786	7.5095
PTAR1	-0.49213	7.0477	-10.121	9.1702e-10	3.082e-08	12.04	7.343	7.2738	7.0136	7.0207	6.8392	6.7959
TBC1D24	-0.57599	6.0423	-10.117	9.2452e-10	3.1016e-08	12.131	6.4167	6.3122	5.9338	6.0101	5.8154	5.7655
MGST3	-0.72398	5.3297	-10.107	9.411e-10	3.151e-08	12.207	5.7034	5.7457	5.19	5.3575	4.8918	5.0897
HERC2P2	-0.77142	6.9467	-10.106	9.4261e-10	3.151e-08	12.015	7.4833	7.3245	6.9854	6.6175	6.6725	6.597
SEPN1	1.1121	3.5267	10.102	9.5049e-10	3.1703e-08	12.508	2.8717	2.9525	3.5953	3.6952	4.0147	4.0306
BBC3	-0.66502	5.5275	-10.101	9.518e-10	3.1703e-08	12.165	5.9576	5.85	5.374	5.4927	5.3163	5.1745
ELOVL1	-0.59326	5.5085	-10.099	9.5507e-10	3.1756e-08	12.163	5.8356	5.9029	5.391	5.3727	5.2595	5.2893
CLK1	-0.49723	7.0364	-10.086	9.7741e-10	3.2441e-08	11.974	7.3285	7.3131	7.0131	6.9179	6.8105	6.8354
RNF123	-0.65958	6.9127	-10.079	9.8954e-10	3.2785e-08	11.969	7.3493	7.2697	6.9155	6.6363	6.7011	6.6042
CALCOCO1	-0.71977	5.7696	-10.075	9.9821e-10	3.3014e-08	12.085	6.2409	6.0883	5.8178	5.5717	5.5	5.3989
STOM	-0.51802	6.9233	-10.067	1.0119e-09	3.3406e-08	11.948	7.2009	7.2323	6.7927	6.9183	6.6856	6.7102
KEL	-0.63364	7.0496	-10.044	1.055e-09	3.4768e-08	11.893	7.4675	7.3545	7.0838	6.8326	6.8156	6.7433
PMAIP1	-0.59196	5.673	-10.041	1.0621e-09	3.4941e-08	12.039	6.018	5.9339	5.6964	5.6219	5.382	5.3861
FAXDC2	-1.3397	2.5332	-10.021	1.1e-09	3.6125e-08	12.376	3.2481	3.2767	2.306	2.5273	1.9078	1.9331
UTY	-0.63246	6.0647	-10.018	1.106e-09	3.6256e-08	11.945	6.4975	6.3327	6.0766	5.9135	5.797	5.7709
DNAJB9	-0.7818	4.2118	-10.01	1.1231e-09	3.6754e-08	12.198	4.6852	4.6421	4.0988	4.0895	3.844	3.911
STXBP5	0.52744	6.4612	10.002	1.1388e-09	3.72e-08	11.895	6.1664	6.1283	6.5907	6.5326	6.6714	6.678
TOR4A	0.7792	4.7227	10.001	1.142e-09	3.7242e-08	12.157	4.1944	4.3604	4.8205	4.844	5.0857	5.031
ITM2A	2.0463	2.5472	9.9927	1.1589e-09	3.7727e-08	12.215	1.4211	1.2492	2.8068	3.0922	3.1915	3.5227
RHBDD1	-0.56229	5.7874	-9.9848	1.1759e-09	3.8211e-08	11.919	6.0895	6.0849	5.7611	5.7444	5.4907	5.5541
IER3	-1.2132	4.8524	-9.9801	1.1861e-09	3.8476e-08	12.045	5.5688	5.4074	5.1185	4.4519	4.351	4.2166
AKAP8L	-0.5321	7.6387	-9.979	1.1884e-09	3.8486e-08	11.722	7.9363	7.9486	7.6397	7.4815	7.4719	7.3541
ABR	0.76421	4.5939	9.9724	1.2028e-09	3.8884e-08	12.123	4.1692	4.1586	4.7026	4.676	4.9312	4.9256
YIPF6	-0.59116	5.9749	-9.9524	1.2479e-09	4.027e-08	11.835	6.3319	6.2333	5.8935	6.0125	5.6554	5.723
SLC43A1	-0.5324	6.52	-9.9475	1.2589e-09	4.0558e-08	11.762	6.8258	6.8308	6.4948	6.3809	6.2608	6.3271
CYFIP1	0.92892	4.1237	9.9431	1.2692e-09	4.0818e-08	12.15	3.5316	3.6757	4.2117	4.2712	4.4749	4.5771
PCMTD1	-0.54927	5.9551	-9.9373	1.2827e-09	4.1181e-08	11.811	6.2508	6.2026	5.9434	5.9753	5.7031	5.6555
UBA1	0.48499	7.3542	9.9354	1.2873e-09	4.1258e-08	11.675	7.091	7.1044	7.3303	7.4337	7.5875	7.5783
VEGFA	-0.47479	8.6558	-9.9337	1.2912e-09	4.1311e-08	11.563	8.9192	8.8881	8.7072	8.5596	8.4654	8.3952
ABCC5	-0.56602	7.8093	-9.932	1.2954e-09	4.1375e-08	11.619	8.1976	8.1054	7.8048	7.5758	7.5995	7.5729
CSRP1	0.53011	6.7663	9.9135	1.34e-09	4.267e-08	11.694	6.3931	6.534	6.8291	6.8558	6.9885	6.9975
QTRT2	0.74069	4.6994	9.9133	1.3405e-09	4.267e-08	11.996	4.2911	4.2599	4.8099	4.8059	4.9986	5.031
FAM83G	0.79596	4.4764	9.9091	1.351e-09	4.293e-08	12.025	4.0533	4.0173	4.5643	4.5537	4.8698	4.8003
IMPA2	-0.78934	4.2142	-9.9073	1.3553e-09	4.2995e-08	12.009	4.6004	4.7086	4.0884	4.1566	3.873	3.8583
SMS	0.55833	6.4383	9.9059	1.359e-09	4.3037e-08	11.717	6.0563	6.1712	6.5163	6.5471	6.6256	6.7132
SCN2A	0.6857	5.1257	9.9041	1.3634e-09	4.3104e-08	11.901	4.8047	4.7176	5.1981	5.1461	5.4039	5.484
IDH2	-0.46398	7.7189	-9.8987	1.3771e-09	4.3463e-08	11.566	7.9498	7.984	7.6365	7.7373	7.5037	7.5021
UROD	-0.45416	8.1312	-9.8908	1.3971e-09	4.4022e-08	11.52	8.3618	8.3715	8.0907	8.1426	7.8602	7.9605
CXXC5	0.60307	5.8907	9.8861	1.4094e-09	4.4266e-08	11.761	5.4337	5.5165	6.066	6.1723	6.0803	6.0756
ALDH4A1	0.72515	4.9724	9.886	1.4097e-09	4.4266e-08	11.897	4.6583	4.4782	5.0343	5.0731	5.3057	5.2845
CTC-756D1.1	-2.0746	1.3619	-9.8778	1.4311e-09	4.4864e-08	11.88	2.6343	2.2917	1.3818	1.0904	0.3631	0.40995
SLC30A5	0.52779	6.6021	9.8759	1.4361e-09	4.4937e-08	11.638	6.3558	6.2771	6.6211	6.6732	6.8091	6.8764
LINC00998	0.64302	5.7598	9.8751	1.4382e-09	4.4937e-08	11.752	5.431	5.3381	5.8147	5.9264	5.9687	6.08
PPARA	-0.53962	6.3713	-9.863	1.4705e-09	4.5869e-08	11.621	6.6454	6.6686	6.3949	6.2799	6.152	6.0867
ARF3	0.97351	3.8554	9.8565	1.4883e-09	4.6346e-08	12.029	3.3187	3.2523	4.028	4.0062	4.2994	4.2281
RUNDC3A-AS1	-1.9677	1.3266	-9.8514	1.5024e-09	4.6706e-08	11.814	2.3158	2.3732	1.2386	1.2997	0.30235	0.42999
C3orf58	-0.66768	5.261	-9.8487	1.51e-09	4.6864e-08	11.733	5.7166	5.5469	5.1455	5.2347	4.9262	4.9962
FAM129A	0.55587	6.6888	9.8417	1.5296e-09	4.7395e-08	11.569	6.3147	6.3911	6.731	6.8802	6.8942	6.9215
WDR26	-0.51962	6.5147	-9.8394	1.5362e-09	4.7521e-08	11.558	6.869	6.766	6.4075	6.4514	6.2777	6.3163
PSMG3	-0.59901	5.3939	-9.8296	1.5641e-09	4.8304e-08	11.679	5.6835	5.762	5.3276	5.3383	5.1528	5.0991
NCKAP1L	0.51659	6.7184	9.8228	1.5839e-09	4.8835e-08	11.53	6.3368	6.4486	6.8482	6.8599	6.8952	6.9215
BCAR1	0.62194	5.5399	9.815	1.6071e-09	4.9467e-08	11.671	5.1099	5.2282	5.6417	5.6762	5.8086	5.7749
ZNF512B	0.6842	5.0517	9.813	1.613e-09	4.9567e-08	11.746	4.7204	4.5968	5.1489	5.157	5.3467	5.3405
CYB5A	-0.61404	6.0352	-9.8095	1.6234e-09	4.9806e-08	11.555	6.4719	6.2733	6.0138	5.9391	5.7228	5.7905
RNF19A	-0.51523	6.4914	-9.8082	1.6273e-09	4.9843e-08	11.502	6.79	6.7773	6.4501	6.3891	6.3142	6.2279
TRIM26	0.88389	4.1348	9.788	1.6895e-09	5.1662e-08	11.86	3.5803	3.6619	4.2681	4.2974	4.4662	4.5349
MFSD10	1.1018	3.8882	9.7772	1.7236e-09	5.2544e-08	11.883	3.1676	3.3243	4.0884	4.0266	4.4817	4.2409
ZFP36	-0.97311	5.9126	-9.7771	1.724e-09	5.2544e-08	11.5	6.4994	6.4726	5.9795	5.4753	5.669	5.3797
TMEM56	-0.51958	8.0771	-9.771	1.7433e-09	5.2987e-08	11.294	8.4623	8.2956	7.9421	8.047	7.8167	7.8989
ITPRIP	-0.68242	5.4106	-9.7708	1.7442e-09	5.2987e-08	11.562	5.907	5.6923	5.2519	5.3814	5.0913	5.14
PTMS	-0.87271	3.9029	-9.7699	1.747e-09	5.2987e-08	11.803	4.3708	4.3746	3.9226	3.7385	3.5429	3.468
ISG20	-1.5301	2.1272	-9.7662	1.7591e-09	5.3266e-08	11.886	2.9404	2.8586	2.181	2.0071	1.4979	1.278
CDC34	-0.52094	6.038	-9.7475	1.8213e-09	5.5061e-08	11.437	6.3418	6.3276	5.9833	5.9479	5.8141	5.8135
SIPA1L1	0.83977	4.4645	9.7432	1.8357e-09	5.5407e-08	11.716	4.0325	4.0064	4.5543	4.4924	4.7681	4.9335
LTBR	0.77355	4.5382	9.7314	1.8767e-09	5.6551e-08	11.678	4.166	4.0879	4.6232	4.5447	4.93	4.8772
GLRX5	-0.47617	7.1135	-9.7298	1.882e-09	5.662e-08	11.296	7.3553	7.379	7.0354	7.1296	6.8897	6.892
KLF9	-0.62311	5.0672	-9.7185	1.9222e-09	5.7649e-08	11.512	5.4664	5.4239	4.9196	4.9554	4.7862	4.8514
AGO1	0.71478	4.7913	9.7184	1.9223e-09	5.7649e-08	11.612	4.4357	4.3403	4.8739	4.8892	5.1158	5.0928
AGTRAP	0.61554	5.3672	9.7132	1.9411e-09	5.8116e-08	11.504	5.0016	5.0091	5.4839	5.4699	5.6004	5.6384
NSMAF	0.58181	5.8389	9.7032	1.9777e-09	5.912e-08	11.409	5.564	5.4722	5.8875	5.904	6.1423	6.0633
JAK2	-0.5006	6.7398	-9.6945	2.01e-09	5.9988e-08	11.263	7.0406	6.9551	6.751	6.6944	6.5249	6.4727
ATN1	-0.79896	4.2163	-9.6871	2.0379e-09	6.0723e-08	11.596	4.7547	4.5649	4.1228	4.1346	3.8493	3.8712
SNCA	-1.211	2.7252	-9.6853	2.0447e-09	6.0829e-08	11.769	3.3804	3.3417	2.6832	2.6707	2.0624	2.213
ADD3	0.562	6.132	9.6828	2.0544e-09	6.102e-08	11.333	5.8052	5.7866	6.2351	6.2558	6.2963	6.4129
CTC-756D1.3	-1.7399	1.6882	-9.6725	2.0941e-09	6.2102e-08	11.634	2.5682	2.6028	1.553	1.7463	0.72897	0.92956
WSCD2	0.57846	5.8177	9.6709	2.1006e-09	6.2195e-08	11.351	5.526	5.4523	5.8521	5.9401	6.0695	6.0665
DBI	0.88979	4.3661	9.6538	2.1689e-09	6.4114e-08	11.579	3.7768	3.8485	4.4793	4.6806	4.7398	4.6716
PKN1	0.4612	7.464	9.6504	2.1826e-09	6.4326e-08	11.125	7.1702	7.2008	7.5896	7.5327	7.6152	7.6754
LBH	-0.46099	7.3348	-9.6503	2.1829e-09	6.4326e-08	11.124	7.548	7.6201	7.2675	7.3275	7.122	7.1238
USP22	0.43204	7.8674	9.6437	2.21e-09	6.5022e-08	11.076	7.6353	7.6266	7.8846	7.9306	8.081	8.0465
CLCN4	-0.51313	6.5243	-9.6374	2.236e-09	6.5683e-08	11.172	6.8293	6.8111	6.3822	6.5085	6.3127	6.3021
RAB3IP	-0.94043	3.5501	-9.6333	2.2536e-09	6.6094e-08	11.586	4.2345	4.0601	3.2229	3.3753	3.1789	3.2288
RAB29	1.5686	2.6455	9.6254	2.287e-09	6.697e-08	11.627	1.6204	1.7967	2.9968	2.8806	3.3761	3.2028
SWAP70	0.82752	4.3553	9.624	2.2929e-09	6.7035e-08	11.512	3.8698	3.9161	4.3776	4.5253	4.734	4.709
MLEC	0.47495	7.0561	9.6082	2.3621e-09	6.8953e-08	11.079	6.7765	6.8324	7.0502	7.1193	7.2768	7.2815
KCNAB2	-0.66697	4.98	-9.6031	2.3847e-09	6.9504e-08	11.327	5.2564	5.2267	5.1522	5.082	4.642	4.521
ZBED6CL	0.696	5.1374	9.5904	2.4423e-09	7.1069e-08	11.307	4.7589	4.7462	5.2917	5.1247	5.4864	5.4166
RABGAP1L	-0.48357	7.6403	-9.5811	2.485e-09	7.22e-08	10.965	7.9166	7.9006	7.6659	7.5077	7.439	7.4122
HPS4	-0.42826	8.2803	-9.5752	2.5129e-09	7.2897e-08	10.905	8.5028	8.5045	8.3132	8.2111	8.0723	8.0782
LDLRAD3	1.0386	3.5254	9.5692	2.5413e-09	7.3581e-08	11.531	2.9254	2.9219	3.6901	3.6859	3.9811	3.9479
MZF1	-0.62817	5.7331	-9.5686	2.5443e-09	7.3581e-08	11.132	6.1455	6.0249	5.7556	5.5546	5.477	5.4408
WNK1	-0.44191	7.9415	-9.56	2.5859e-09	7.4667e-08	10.9	8.2289	8.1548	7.845	7.9218	7.7341	7.7646
AC093323.3	-0.6166	5.1773	-9.5589	2.591e-09	7.4699e-08	11.197	5.5604	5.4469	5.1605	5.1196	4.8957	4.8808
SAMHD1	1.1443	3.291	9.5475	2.6475e-09	7.6209e-08	11.51	2.6343	2.5932	3.4565	3.5415	3.7758	3.7449
ACTN1	3.3485	1.1316	9.5323	2.7243e-09	7.8301e-08	10.045	-1.2634	-0.41171	1.794	1.6445	2.5544	2.4717
RRN3	0.53682	6.2537	9.5289	2.7416e-09	7.8675e-08	11.017	5.9184	5.994	6.2662	6.3602	6.4755	6.5082
UCA1	0.4832	7.7489	9.5255	2.7593e-09	7.9062e-08	10.86	7.385	7.5262	7.8261	7.882	7.9038	7.9705
MMD	-1.0535	3.1673	-9.5223	2.7761e-09	7.9421e-08	11.44	3.6774	3.694	3.1514	3.1874	2.7376	2.5561
TCOF1	0.45389	7.0879	9.5055	2.8653e-09	8.1847e-08	10.877	6.8258	6.8609	7.1221	7.1242	7.2998	7.2947
PMM1	-0.70831	4.5858	-9.4962	2.9163e-09	8.3178e-08	11.172	5.0087	4.9325	4.5793	4.4817	4.2051	4.3074
NAPRT	-0.43982	7.4482	-9.4933	2.9321e-09	8.3501e-08	10.811	7.6739	7.7054	7.4164	7.3915	7.278	7.224
RUNX2	3.3103	1.2632	9.4911	2.9444e-09	8.3722e-08	9.9839	-0.44631	-1.2289	2.2069	2.1079	2.425	2.5145
PTPRJ	-0.78239	4.2384	-9.4723	3.051e-09	8.662e-08	11.183	4.656	4.6906	4.0496	4.2556	3.8782	3.9002
TMED2	0.51229	7.1572	9.462	3.1108e-09	8.8186e-08	10.791	6.8739	6.8215	7.2123	7.3205	7.2993	7.4155
ICAM4	-0.53046	5.8252	-9.4497	3.1842e-09	9.013e-08	10.892	6.0819	6.1565	5.7578	5.7775	5.5917	5.5858
GAS2L1	-0.79056	4.4273	-9.4442	3.2178e-09	9.0941e-08	11.085	5.0051	4.8413	4.2021	4.2191	4.264	4.0323
HIST1H2BK	-0.39504	9.1107	-9.4307	3.301e-09	9.3151e-08	10.565	9.3482	9.3034	9.0961	9.0572	8.8919	8.967
PDE3A	1.7269	2.4034	9.4295	3.3087e-09	9.3227e-08	11.229	1.3995	1.3675	2.889	2.553	3.0738	3.1373
ANKRD28	0.56922	5.7446	9.4132	3.4124e-09	9.6006e-08	10.873	5.3756	5.3597	5.9192	5.945	5.8941	5.9744
NRIP3	-0.52374	5.9613	-9.394	3.5393e-09	9.9426e-08	10.763	6.2575	6.2928	5.8084	5.9065	5.7515	5.7512
LINC01531	3.893	0.86563	9.3847	3.6029e-09	1.0106e-07	9.0002	-1.7489	-1.2289	1.7595	1.6252	2.3444	2.4424
TRIM58	-0.66828	5.1578	-9.3721	3.6905e-09	1.0336e-07	10.83	5.5975	5.5165	5.0307	5.002	5.0105	4.7897
HIST1H1C	-0.38453	9.4694	-9.3498	3.8502e-09	1.0767e-07	10.381	9.7023	9.691	9.4454	9.3548	9.29	9.3329
GNAI2	0.52536	6.524	9.3482	3.862e-09	1.0778e-07	10.635	6.1648	6.2626	6.5653	6.6761	6.715	6.7602
GPR146	-1.5247	2.1189	-9.3477	3.8657e-09	1.0778e-07	11.13	2.7663	3.0335	2.1279	1.9921	1.538	1.2557
NT5C2	0.55956	6.2383	9.3432	3.8992e-09	1.0856e-07	10.662	5.9372	5.8822	6.3331	6.3474	6.3882	6.542
ATG4D	-0.58012	5.2294	-9.3399	3.9241e-09	1.0909e-07	10.76	5.5506	5.5877	5.1422	5.1118	5.0235	4.9605
ANK1	-0.39106	10.559	-9.3342	3.967e-09	1.1011e-07	10.286	10.824	10.783	10.532	10.392	10.424	10.401
MBNL2	-0.45009	7.0381	-9.3289	4.0069e-09	1.1106e-07	10.526	7.3066	7.2555	7.0035	7.003	6.8064	6.8534
CYBA	1.1073	3.6229	9.3238	4.0466e-09	1.1199e-07	11.059	2.824	3.1635	3.7876	3.7849	4.0076	4.1697
DENND5A	0.86709	4.1239	9.3162	4.1054e-09	1.1345e-07	10.963	3.561	3.712	4.2985	4.1716	4.4783	4.5221
C1GALT1	-0.54753	5.5664	-9.3062	4.1847e-09	1.1547e-07	10.649	5.8955	5.8295	5.5256	5.5217	5.2882	5.3379
LDHA	0.64206	7.7381	9.3052	4.1931e-09	1.1553e-07	10.432	7.3806	7.3705	7.7022	7.9495	7.9003	8.1255
SLFN14	-0.69319	4.4151	-9.2971	4.2582e-09	1.1715e-07	10.811	4.8668	4.7829	4.2773	4.305	4.1086	4.1502
RP11-734I18.1	-0.86886	4.2829	-9.2944	4.2805e-09	1.1759e-07	10.828	4.6238	4.9286	4.262	4.0611	3.9468	3.8749
LMNB2	0.43015	7.8467	9.2844	4.3633e-09	1.1969e-07	10.377	7.6123	7.6337	7.8486	7.8758	8.0982	8.0117
BCL6	-1.8609	1.6888	-9.2799	4.4009e-09	1.2037e-07	10.954	2.6707	2.7495	1.7595	1.1725	1.1469	0.63379
ALDH18A1	-0.43292	7.5888	-9.2799	4.401e-09	1.2037e-07	10.383	7.778	7.8567	7.5415	7.588	7.3854	7.3833
CLCN3	-0.45802	7.4308	-9.2768	4.4269e-09	1.209e-07	10.388	7.6598	7.716	7.3237	7.4283	7.1995	7.2574
TMEM120B	-0.68038	4.6366	-9.271	4.4765e-09	1.2208e-07	10.726	5.0211	4.9981	4.5768	4.5473	4.4115	4.2648
FIS1	-0.48436	6.5793	-9.2544	4.6218e-09	1.2585e-07	10.423	6.7978	6.8972	6.5079	6.5494	6.3432	6.3805
MED25	-0.48109	7.2556	-9.244	4.7145e-09	1.2809e-07	10.337	7.5308	7.547	7.229	7.1063	7.1132	7.0076
HSPA1B	-0.53641	7.6029	-9.2437	4.7176e-09	1.2809e-07	10.305	7.9588	7.9225	7.5859	7.3392	7.4291	7.3817
ETS2	0.59585	5.2773	9.2416	4.7367e-09	1.2842e-07	10.603	4.9599	4.9344	5.3217	5.364	5.5268	5.557
DCTD	0.55255	5.7084	9.2399	4.7515e-09	1.2863e-07	10.537	5.3379	5.3711	5.8438	5.8808	5.9303	5.8865
GAB1	-0.52031	5.9516	-9.2376	4.7729e-09	1.2885e-07	10.463	6.2672	6.1858	5.9444	5.896	5.7337	5.6829
TM6SF1	1.1153	3.2228	9.2376	4.7732e-09	1.2885e-07	10.929	2.6616	2.5437	3.3847	3.3103	3.7159	3.7207
TMEM14A	1.6052	2.333	9.2346	4.8004e-09	1.294e-07	10.869	1.2868	1.4341	2.6458	2.7124	2.9256	2.9932
GMFG	1.3829	3.0675	9.2188	4.9484e-09	1.3305e-07	10.905	2.3042	2.0723	3.3676	3.5466	3.4514	3.6627
MGAT5	0.93133	4.0572	9.2186	4.9504e-09	1.3305e-07	10.792	3.6684	3.3417	4.2496	4.1996	4.4731	4.4106
XK	-0.43619	7.5823	-9.2042	5.0894e-09	1.3659e-07	10.233	7.7992	7.8466	7.4897	7.5853	7.3821	7.3907
APOL4	-0.52111	6.4555	-9.1992	5.1393e-09	1.3774e-07	10.329	6.6551	6.7959	6.4166	6.463	6.1563	6.2464
HIST2H2BE	-0.44023	7.3881	-9.1979	5.1519e-09	1.3788e-07	10.235	7.6356	7.6589	7.3595	7.2604	7.213	7.2015
FBXO30	-0.57123	6.5138	-9.1885	5.2462e-09	1.402e-07	10.301	6.9276	6.692	6.4789	6.5104	6.1996	6.274
ZNF792	1.4675	2.674	9.1816	5.3163e-09	1.4181e-07	10.821	1.8756	1.655	3.1245	2.9167	3.249	3.2231
ARPC2	0.54612	6.0201	9.1811	5.3217e-09	1.4181e-07	10.371	5.6935	5.7103	6.0879	6.1399	6.185	6.3038
CTSC	0.51726	6.0936	9.1793	5.3394e-09	1.4208e-07	10.358	5.7414	5.8223	6.1806	6.2213	6.2841	6.312
CST7	1.0234	4.0527	9.167	5.4684e-09	1.453e-07	10.718	3.1991	3.4422	4.3804	4.6173	4.3033	4.3736
MAPK12	1.1238	3.6407	9.1543	5.6035e-09	1.4868e-07	10.729	3.0687	2.9972	3.8749	3.567	4.254	4.0822
CDKN2A	0.41304	7.8202	9.1337	5.8319e-09	1.5452e-07	10.086	7.5642	7.5281	7.9481	7.9607	7.9835	7.937
RPS27	-0.37122	9.9774	-9.1221	5.9636e-09	1.5778e-07	9.9013	10.14	10.207	10.002	9.9106	9.804	9.8005
H6PD	1.0746	3.4526	9.1175	6.0178e-09	1.5899e-07	10.69	2.8159	2.6503	3.8587	3.7696	3.8252	3.796
NIPAL2	0.69875	4.7261	9.1154	6.0416e-09	1.594e-07	10.461	4.2586	4.3661	4.88	4.8377	4.9708	5.0433
NAB2	0.79223	4.2031	9.1061	6.1512e-09	1.6206e-07	10.542	3.7214	3.7386	4.3371	4.3717	4.5503	4.4998
CAPS2	-1.0031	3.3962	-9.103	6.1892e-09	1.6283e-07	10.602	4.1108	3.8114	3.1908	3.3461	2.9555	2.9626
TPRG1L	-0.70189	4.7482	-9.0997	6.228e-09	1.6362e-07	10.371	5.1763	5.0871	4.594	4.7865	4.3584	4.4867
CMTM3	2.6381	1.2804	9.0947	6.2888e-09	1.6498e-07	9.8962	-0.52648	-0.066579	1.7419	1.8497	2.3594	2.3242
TBC1D15	-0.56258	6.2124	-9.0936	6.3024e-09	1.6511e-07	10.147	6.5467	6.4506	6.1831	6.2341	5.8343	6.0255
2019-03-02	-0.57519	5.2383	-9.0927	6.3142e-09	1.6519e-07	10.278	5.5384	5.5531	5.2077	5.1992	4.9148	5.0162
MCTP2	0.58778	5.2578	9.0811	6.457e-09	1.6869e-07	10.29	4.9283	4.9325	5.351	5.3008	5.5042	5.53
SLC7A6	0.72873	4.6132	9.0602	6.7248e-09	1.7544e-07	10.371	4.2466	4.1651	4.6564	4.7513	4.8789	4.981
ATP7A	-0.44877	6.747	-9.0571	6.7657e-09	1.7626e-07	10.015	6.9986	6.9933	6.6666	6.7296	6.539	6.5546
LPCAT3	-0.4633	6.4325	-9.0476	6.8917e-09	1.7929e-07	10.028	6.6687	6.7201	6.3571	6.3862	6.2377	6.225
PLP2	0.57297	5.6456	9.0429	6.9545e-09	1.8067e-07	10.156	5.2534	5.3367	5.7806	5.7753	5.81	5.9179
ARPP19	0.47044	6.7002	9.0356	7.0545e-09	1.8282e-07	9.9959	6.4307	6.4036	6.7614	6.8329	6.8591	6.9135
GALNT14	1.643	2.4333	9.0354	7.0567e-09	1.8282e-07	10.521	1.2391	1.6917	2.6075	2.8309	3.1747	3.0558
RCL1	-0.48001	6.429	-9.0341	7.0755e-09	1.8305e-07	10.001	6.7314	6.6778	6.4061	6.3082	6.2361	6.2146
ATG14	-0.51621	5.6145	-9.0297	7.1364e-09	1.8437e-07	10.094	5.8897	5.9252	5.5486	5.5412	5.3903	5.3919
GFI1B	-0.40743	7.9203	-9.0284	7.1545e-09	1.8458e-07	9.8568	8.0946	8.1723	7.8851	7.9184	7.7207	7.7307
SEC23A	0.75033	4.519	9.0239	7.2169e-09	1.8583e-07	10.321	4.1338	4.0245	4.6062	4.6992	4.7765	4.8735
GALNT2	0.45237	6.8178	9.0235	7.2227e-09	1.8583e-07	9.9578	6.5307	6.5702	6.8777	6.924	6.9898	7.0144
PLIN3	0.50154	6.2207	9.0213	7.2533e-09	1.8636e-07	10.027	5.879	5.952	6.3183	6.3444	6.3846	6.4456
CRYBG3	0.64529	4.9245	9.0094	7.4236e-09	1.9047e-07	10.213	4.5129	4.5649	5.0397	5.0678	5.1453	5.2162
ASB13	0.92056	3.9636	9.0081	7.4428e-09	1.907e-07	10.392	3.5217	3.3647	3.9725	4.1882	4.3898	4.3448
RAB8A	0.50016	6.0297	9.0033	7.5127e-09	1.9223e-07	10.013	5.7349	5.7609	6.0748	6.1124	6.2371	6.2576
ARHGEF37	-1.3181	2.1538	-8.9995	7.5688e-09	1.934e-07	10.487	2.9404	2.8586	1.9856	1.9617	1.6274	1.5493
BCAT1	0.43982	9.148	8.9934	7.6597e-09	1.9545e-07	9.7043	8.8692	8.8882	9.1666	9.33	9.2726	9.3614
OCIAD2	0.79322	4.1512	8.9919	7.6818e-09	1.9575e-07	10.327	3.6639	3.6803	4.3254	4.302	4.4903	4.4455
GADD45B	-1.3133	6.1033	-8.9871	7.7542e-09	1.9733e-07	9.9373	6.9425	6.7617	6.355	5.4618	5.6824	5.4166
ZNF134	0.83906	4.1046	8.9818	7.8354e-09	1.9912e-07	10.312	3.5898	3.6803	4.1564	4.2399	4.5421	4.4194
SNAP47	-0.55004	5.461	-8.9783	7.8886e-09	2.002e-07	10.019	5.7045	5.7706	5.4286	5.4934	5.1517	5.2169
POGK	0.55926	5.61	8.9653	8.0926e-09	2.051e-07	10.001	5.2443	5.3482	5.6605	5.7012	5.8222	5.8838
VAT1	0.39701	8.0893	8.9552	8.2545e-09	2.0891e-07	9.7024	7.8596	7.8964	8.0837	8.1464	8.2743	8.2755
ACOT9	0.93625	4.0651	8.9545	8.2653e-09	2.0891e-07	10.267	3.5464	3.576	4.0496	4.2478	4.3825	4.5883
SMC1B	-0.51573	5.7879	-8.9523	8.3013e-09	2.0941e-07	9.9184	6.0632	6.0455	5.8084	5.7388	5.5	5.5717
IRAK1	0.42403	7.1371	8.9519	8.3077e-09	2.0941e-07	9.7763	6.9411	6.9303	7.1037	7.1287	7.3483	7.3702
PCGF5	-0.5478	6.3662	-8.9492	8.3513e-09	2.1023e-07	9.8376	6.7502	6.5965	6.2398	6.366	6.0655	6.1792
PIP4K2B	0.5267	5.7258	8.9395	8.511e-09	2.1396e-07	9.9306	5.439	5.4184	5.821	5.7666	5.9447	5.965
HNRNPM	0.42071	8.2362	8.9332	8.6177e-09	2.1635e-07	9.6477	8.0258	7.9789	8.2305	8.3381	8.3903	8.4534
TNRC18	0.53413	6.3983	8.925	8.7562e-09	2.1953e-07	9.8087	6.1504	6.0526	6.5118	6.3969	6.6978	6.5803
GTPBP1	-0.45188	7.1575	-8.9154	8.9237e-09	2.232e-07	9.6905	7.4282	7.4258	7.123	7.014	7.0178	6.9365
TAX1BP3	-1.5346	1.7834	-8.9152	8.9266e-09	2.232e-07	10.296	2.7236	2.5235	1.7419	1.5454	1.0393	1.1266
SOCS2	0.44373	6.7404	8.9082	9.0508e-09	2.2588e-07	9.7336	6.493	6.4792	6.8054	6.8063	6.9153	6.943
PARP4	0.44854	7.0526	8.9072	9.0675e-09	2.2588e-07	9.6995	6.765	6.8215	7.1466	7.1026	7.2026	7.2772
KIF3B	0.73381	4.4363	8.9071	9.0702e-09	2.2588e-07	10.106	4.0395	3.9353	4.6256	4.579	4.6961	4.7424
BCR	0.50146	5.949	8.904	9.1262e-09	2.2698e-07	9.8271	5.6314	5.6775	6.0284	6.0455	6.1558	6.1557
ICAM3	1.1268	3.6078	8.9031	9.1411e-09	2.2704e-07	10.263	2.7408	2.9296	3.887	4.1549	4.0147	3.9199
ARF6	0.41406	7.68	8.9014	9.1729e-09	2.2753e-07	9.6278	7.4646	7.4541	7.6749	7.7418	7.8469	7.8978
AC079466.1	1.0839	3.2418	8.8964	9.2619e-09	2.2943e-07	10.265	2.7747	2.622	3.3444	3.1439	3.7814	3.7844
LMNB1	0.4455	7.4027	8.8933	9.3198e-09	2.3056e-07	9.637	7.1068	7.2068	7.4028	7.495	7.6062	7.5983
SH3TC2	-0.46222	6.2645	-8.8879	9.4183e-09	2.3269e-07	9.7205	6.5847	6.5727	6.1198	6.0796	6.0927	6.1375
2019-03-03	-0.69583	4.458	-8.8816	9.5368e-09	2.353e-07	9.9893	4.8882	4.7786	4.4819	4.329	4.1108	4.1592
MAFA	-1.1767	3.0543	-8.8775	9.6125e-09	2.3686e-07	10.216	3.6503	3.5956	3.2849	2.8642	2.5802	2.3507
SEMA7A	-0.43151	7.6584	-8.8743	9.6744e-09	2.3807e-07	9.5667	7.8372	7.9557	7.5856	7.6412	7.4823	7.4488
HIST1H3C	-0.36571	8.8628	-8.8678	9.7991e-09	2.4082e-07	9.4634	9.0199	9.0734	8.8701	8.8529	8.6644	8.6961
F2R	1.1948	3.0701	8.8613	9.9241e-09	2.4357e-07	10.221	2.3499	2.2676	3.3444	3.4319	3.5786	3.4485
CDKN1C	-1.3066	2.7431	-8.8534	1.0081e-08	2.471e-07	10.199	3.4343	3.2645	3.0406	2.5983	2.1598	1.9609
RPL28	-0.37078	9.6446	-8.8399	1.0353e-08	2.5337e-07	9.3539	9.8774	9.8006	9.6717	9.5821	9.4545	9.4812
KPNB1	0.39242	8.6693	8.8393	1.0365e-08	2.5337e-07	9.4241	8.4334	8.4918	8.6482	8.7342	8.8302	8.8779
SURF4	0.4549	7.7487	8.8382	1.0387e-08	2.5337e-07	9.4972	7.4441	7.5118	7.7813	7.8943	7.8785	7.9825
CDC42SE1	0.46772	6.4795	8.838	1.0391e-08	2.5337e-07	9.6225	6.1932	6.2278	6.5311	6.5716	6.646	6.7071
NPW	1.6781	1.9663	8.8348	1.0458e-08	2.5456e-07	10.076	0.97359	1.1203	2.1279	2.1354	2.6969	2.7439
L3MBTL3	1.124	3.1025	8.834	1.0475e-08	2.5456e-07	10.161	2.539	2.3732	3.2292	3.3073	3.5977	3.5686
STARD5	-1.0299	3.0013	-8.833	1.0494e-08	2.5456e-07	10.129	3.6503	3.4476	2.9668	2.9008	2.5281	2.5145
RRP1B	0.43664	7.0779	8.833	1.0495e-08	2.5456e-07	9.5456	6.808	6.8634	7.0986	7.151	7.2966	7.25
RASD1	-1.248	5.0389	-8.8281	1.0597e-08	2.5671e-07	9.7749	5.8771	5.5643	5.3157	4.5122	4.5535	4.4106
RGCC	-0.72293	4.6876	-8.8231	1.0701e-08	2.5889e-07	9.8295	5.0645	5.0853	4.5134	4.7345	4.4645	4.2634
AGBL5	0.68608	4.6284	8.8177	1.0816e-08	2.6133e-07	9.89	4.1596	4.2477	4.8184	4.7712	4.8632	4.9105
MAP2K3	-0.57893	5.7119	-8.8162	1.0849e-08	2.6179e-07	9.6432	6.2018	5.9801	5.5244	5.5463	5.4675	5.5513
LRRC16A	2.0375	1.8013	8.8143	1.089e-08	2.6244e-07	9.9023	0.53406	0.56866	2.3531	2.2151	2.4462	2.691
SNHG8	-0.41336	7.2634	-8.8134	1.0909e-08	2.6256e-07	9.4769	7.4884	7.4979	7.1938	7.2388	7.1001	7.0614
PLSCR4	-1.1316	2.7113	-8.8119	1.0942e-08	2.6301e-07	10.119	3.174	3.3243	2.7374	2.7838	2.1683	2.0798
GDF11	1.5522	2.3632	8.8076	1.1034e-08	2.6489e-07	10.078	1.3329	1.3675	2.7897	2.9008	2.8427	2.9453
ARPC4	0.52098	5.8171	8.7921	1.1377e-08	2.7278e-07	9.6201	5.4921	5.5481	5.8835	5.902	5.9995	6.0772
NIPA2	0.5021	6.0693	8.7876	1.1479e-08	2.7486e-07	9.5694	5.8486	5.7877	6.0239	6.1168	6.3021	6.3367
LAMA5	-1.0263	4.3617	-8.781	1.163e-08	2.7813e-07	9.7901	5.1248	4.829	4.4307	3.8652	4.0241	3.8966
LDOC1L	1.0854	3.528	8.7767	1.1729e-08	2.7991e-07	10.014	2.9626	2.732	3.8709	3.7608	3.8225	4.0191
HLA-E	0.7178	4.863	8.7765	1.1735e-08	2.7991e-07	9.7706	4.2823	4.5068	5.0361	5.1393	5.0584	5.1551
RAPGEF1	0.78944	4.4984	8.7758	1.1751e-08	2.7995e-07	9.8275	4.1338	3.9843	4.594	4.5588	4.961	4.7584
CR1L	-1.4012	2.4313	-8.7745	1.1782e-08	2.8028e-07	10.056	3.3187	2.9972	2.578	2.149	1.8559	1.6889
ZNF480	0.65907	4.9834	8.7739	1.1795e-08	2.8028e-07	9.7277	4.6308	4.5968	4.9696	5.1579	5.2675	5.2776
POLR2I	-0.51038	5.6999	-8.7729	1.1818e-08	2.8045e-07	9.5675	5.9428	6.005	5.7021	5.6225	5.4667	5.4604
NCL	0.36424	9.8462	8.7645	1.2017e-08	2.8481e-07	9.1925	9.6446	9.6558	9.829	9.9212	9.9781	10.049
PRDX5	-0.54082	5.9584	-8.7635	1.204e-08	2.85e-07	9.5184	6.1799	6.2356	5.9152	6.0906	5.6324	5.6964
SEC14L1	-0.54588	5.0993	-8.7595	1.2138e-08	2.8665e-07	9.6216	5.4573	5.463	4.9079	4.9379	4.9199	4.9096
FAM129B	0.36583	8.6324	8.7594	1.214e-08	2.8665e-07	9.265	8.4308	8.4204	8.6725	8.6862	8.8147	8.7699
MYO18A	-0.56927	6.1747	-8.7538	1.2275e-08	2.8945e-07	9.4633	6.5667	6.4385	6.2033	5.9715	5.9422	5.9263
DCUN1D4	-0.48925	6.3975	-8.7455	1.2478e-08	2.9388e-07	9.4236	6.7352	6.5977	6.3629	6.3385	6.1369	6.2135
ACPP	1.3218	2.7029	8.7417	1.2572e-08	2.9572e-07	9.9943	2.0377	1.8787	2.9206	2.8435	3.1874	3.3494
IL16	0.80898	4.0467	8.7376	1.2676e-08	2.978e-07	9.8291	3.6996	3.5463	4.0884	4.07	4.4817	4.3941
KCTD15	0.59203	5.0776	8.7368	1.2696e-08	2.9789e-07	9.6365	4.7073	4.7309	5.2268	5.1779	5.3173	5.3057
CFAP97	0.43945	7.0217	8.7342	1.2761e-08	2.9903e-07	9.3511	6.7571	6.7885	7.0386	7.124	7.1898	7.2325
TRIP6	0.49157	6.3236	8.7335	1.2779e-08	2.9908e-07	9.4269	6.0477	6.0909	6.3622	6.3131	6.619	6.5085
DPF3	-1.0281	3.1153	-8.7307	1.285e-08	3.0037e-07	9.9117	3.7893	3.5513	3.1177	2.9286	2.7086	2.5966
USP49	-0.62954	4.7864	-8.7296	1.288e-08	3.0068e-07	9.6173	5.1811	5.1577	4.7452	4.5588	4.5189	4.5567
MICALL2	-0.49845	8.6929	-8.7284	1.2909e-08	3.0099e-07	9.1886	9.0145	8.9587	8.7151	8.4874	8.5569	8.4247
ARHGDIA	0.51383	5.8222	8.722	1.3075e-08	3.0447e-07	9.4738	5.5761	5.519	5.8825	5.8285	6.0933	6.0337
GNAQ	0.44513	7.24	8.7182	1.3173e-08	3.0637e-07	9.2992	6.9388	6.9993	7.2817	7.3942	7.3936	7.4327
SRSF9	0.48253	6.418	8.7143	1.3276e-08	3.0838e-07	9.3762	6.1012	6.2271	6.4596	6.4251	6.6721	6.6231
TGFBR2	1.092	3.413	8.7048	1.353e-08	3.1337e-07	9.8788	2.7913	2.7754	3.4293	3.7362	3.8546	3.8912
HIST1H3H	-0.38348	8.7396	-8.7047	1.3531e-08	3.1337e-07	9.1404	8.9819	8.8821	8.7506	8.7277	8.5199	8.5753
KDM2B	0.54534	5.4503	8.7044	1.3541e-08	3.1337e-07	9.4976	5.203	5.1127	5.4746	5.5027	5.7148	5.6938
TRIM6	0.7534	4.1987	8.6994	1.3675e-08	3.161e-07	9.7276	3.76	3.7946	4.2465	4.332	4.5206	4.5384
CHID1	-0.47416	6.708	-8.6952	1.3791e-08	3.1836e-07	9.2867	6.9729	6.9901	6.6378	6.6239	6.5907	6.4326
SGMS1	0.4785	6.0714	8.6905	1.3922e-08	3.2099e-07	9.375	5.8225	5.7792	6.1392	6.1271	6.2899	6.2702
ZNF229	1.2062	2.8525	8.6862	1.404e-08	3.2331e-07	9.8852	2.1058	2.2054	2.9893	3.0992	3.3349	3.3807
CEP55	0.75988	4.3715	8.6855	1.4061e-08	3.234e-07	9.6651	4.0113	3.9161	4.3371	4.5214	4.6976	4.7454
CLCN5	0.5221	6.0283	8.6819	1.416e-08	3.2527e-07	9.3666	5.6746	5.7728	6.0545	6.1748	6.2648	6.2283
C17orf96	0.85375	4.1872	8.6736	1.4398e-08	3.3033e-07	9.681	3.8016	3.6433	4.3165	4.1865	4.6828	4.4927
FABP5	0.68733	4.5169	8.6724	1.4431e-08	3.3069e-07	9.6118	4.1338	4.1152	4.6159	4.621	4.7667	4.8486
PEBP1	0.42889	7.0274	8.6615	1.4748e-08	3.3754e-07	9.2015	6.7812	6.7948	7.0431	7.1134	7.1951	7.2367
GUCD1	-0.38142	8.1905	-8.6597	1.4803e-08	3.3838e-07	9.0874	8.3786	8.4322	8.1111	8.174	8.0192	8.0282
MAX	0.64085	4.9583	8.6546	1.4952e-08	3.4137e-07	9.4929	4.4876	4.6746	5.0505	5.0979	5.2046	5.2349
BTN2A1	1.0894	3.3582	8.6503	1.5084e-08	3.4396e-07	9.7745	2.9179	2.5736	3.525	3.4402	3.9142	3.7785
SEC14L2	0.47886	6.0787	8.6455	1.5227e-08	3.4681e-07	9.287	5.7783	5.7685	6.2312	6.1909	6.2392	6.2639
TRIM52	-0.67707	5.1131	-8.6443	1.5264e-08	3.4721e-07	9.3913	5.5445	5.4416	5.1638	4.8831	4.8854	4.7604
ZNRF1	0.49335	5.9957	8.643	1.5304e-08	3.4771e-07	9.2868	5.6835	5.7824	6.0157	6.0391	6.2392	6.2142
YWHAB	0.47225	7.5972	8.6408	1.5371e-08	3.488e-07	9.1076	7.3581	7.2885	7.6152	7.7363	7.7224	7.8629
AE000661.37	3.3994	1.4881	8.6364	1.5506e-08	3.5144e-07	8.8695	0.17713	-1.5337	2.2197	2.5783	2.8212	2.6658
TUFM	0.40466	7.9373	8.634	1.558e-08	3.5269e-07	9.0612	7.7101	7.7543	7.8899	7.9964	8.1318	8.1414
NLRP2	0.77127	4.1357	8.6325	1.5629e-08	3.5337e-07	9.6071	3.7301	3.6526	4.2925	4.2078	4.4868	4.4442
B3GALT6	0.62415	5.0503	8.6305	1.5691e-08	3.5433e-07	9.4194	4.7182	4.7153	5.0433	5.1325	5.4102	5.2825
SYK	0.55916	5.512	8.626	1.5834e-08	3.5714e-07	9.3319	5.1182	5.2638	5.5724	5.6219	5.7243	5.7714
HECTD4	-0.71564	7.588	-8.6138	1.6226e-08	3.6552e-07	9.036	8.1148	7.935	7.6374	7.216	7.3778	7.2473
CACNA1I	2.4783	1.2953	8.5984	1.6734e-08	3.7652e-07	9.2073	0.3666	-0.57677	1.5731	1.6445	2.4034	2.3612
FUCA2	0.49347	5.897	8.592	1.695e-08	3.8093e-07	9.2001	5.6348	5.584	5.9945	5.96	6.1243	6.0844
ELMO1	0.55649	5.841	8.5894	1.7036e-08	3.8203e-07	9.2125	5.4883	5.4603	6.1087	5.9259	6.0408	6.0222
TREML2	-1.6858	1.3515	-8.5893	1.704e-08	3.8203e-07	9.6	2.269	2.1797	1.2133	1.3709	0.53137	0.5447
NACC2	0.75054	4.3207	8.5824	1.7279e-08	3.8693e-07	9.4751	3.8969	3.828	4.4224	4.5409	4.6588	4.5771
IKZF3	0.55515	5.3892	8.5785	1.7415e-08	3.895e-07	9.2524	5.1395	5.029	5.4106	5.4774	5.6347	5.6443
SH3KBP1	0.88763	3.8996	8.5769	1.747e-08	3.9025e-07	9.5483	3.5016	3.2086	4.0567	4.1397	4.256	4.2352
SOCS3	-1.3526	2.5529	-8.5647	1.7902e-08	3.9944e-07	9.6418	3.1223	3.3359	2.8068	2.2782	1.9579	1.8161
KNTC1	-0.43589	7.7009	-8.564	1.7929e-08	3.9956e-07	8.9287	7.9468	7.9547	7.7214	7.552	7.524	7.5065
DHX9	0.37555	8.7359	8.5625	1.7984e-08	3.9996e-07	8.854	8.4953	8.5424	8.7549	8.8362	8.8682	8.9187
NSUN2	0.45413	6.5515	8.5623	1.799e-08	3.9996e-07	9.05	6.3333	6.2626	6.5684	6.6387	6.7672	6.7388
ADPGK	0.53299	5.4772	8.5536	1.8306e-08	4.065e-07	9.1851	5.2215	5.1561	5.5461	5.4981	5.7017	5.7397
GAS5	-0.41567	8.5316	-8.5523	1.8355e-08	4.0709e-07	8.8434	8.7733	8.679	8.5299	8.5912	8.244	8.372
STAT3	0.43366	6.8012	8.5481	1.851e-08	4.1007e-07	8.9942	6.535	6.5441	6.8554	6.9277	6.9581	6.9868
POP1	0.49041	5.7726	8.5446	1.8639e-08	4.1243e-07	9.1134	5.5273	5.5506	5.7369	5.7638	6.0191	6.0382
ZNF316	0.63557	4.8546	8.5417	1.8751e-08	4.144e-07	9.273	4.5598	4.4834	4.9216	4.8388	5.2118	5.1123
TM7SF3	0.44998	6.6798	8.5365	1.8949e-08	4.1828e-07	8.9869	6.3453	6.4236	6.783	6.8587	6.8355	6.833
EXTL2	0.83858	3.9441	8.5352	1.8998e-08	4.1889e-07	9.4562	3.4343	3.3929	4.2149	4.1312	4.1905	4.3006
NHLRC4	-1.0079	3.0935	-8.529	1.9235e-08	4.236e-07	9.515	3.6134	3.5956	3.0478	3.0602	2.7772	2.4668
MFHAS1	-0.3627	8.2902	-8.5259	1.9357e-08	4.2579e-07	8.8028	8.5269	8.5016	8.1842	8.2246	8.1608	8.1431
ZMPSTE24	0.63069	5.5538	8.5235	1.9448e-08	4.2729e-07	9.1132	5.2246	5.2282	5.4572	5.7058	5.799	5.9076
MAP3K1	0.50031	6.0174	8.5214	1.9532e-08	4.2862e-07	9.0393	5.7078	5.7259	6.0958	6.1471	6.1611	6.2667
POLR2A	-0.553	6.4461	-8.5203	1.9574e-08	4.2905e-07	8.9557	6.8597	6.6406	6.4756	6.3056	6.197	6.1983
KLF1	-0.35676	9.1636	-8.5168	1.9714e-08	4.3159e-07	8.7223	9.3192	9.4088	9.1184	9.1191	9.0306	8.9853
TPRA1	-0.48164	5.7413	-8.5146	1.9802e-08	4.3302e-07	9.0301	6.002	6.049	5.6593	5.646	5.5693	5.5218
OBSCN	0.78334	4.1381	8.505	2.0188e-08	4.4048e-07	9.3547	3.6996	3.6101	4.3917	4.2509	4.4347	4.4418
NBAS	-0.36185	8.8954	-8.5049	2.019e-08	4.4048e-07	8.7152	9.1283	9.1008	8.8658	8.7726	8.7422	8.7625
HNRNPLL	0.46631	6.2744	8.4999	2.0397e-08	4.4423e-07	8.9578	6.0347	5.9643	6.3879	6.3296	6.449	6.4812
VMA21	0.44076	7.3027	8.4996	2.041e-08	4.4423e-07	8.8416	7.0518	7.0638	7.2855	7.421	7.4655	7.5287
RP3-465N24.5	-1.3138	2.0706	-8.4945	2.0619e-08	4.4825e-07	9.511	2.8159	2.732	2.0726	1.8907	1.4285	1.4837
ACLY	0.38401	7.8364	8.4938	2.0647e-08	4.4836e-07	8.782	7.615	7.6242	7.8558	7.9172	7.9898	8.0162
COMMD4	0.50698	5.6682	8.4929	2.0685e-08	4.4865e-07	9.0292	5.3728	5.406	5.6918	5.7483	5.8792	5.9112
HERPUD1	-0.47593	5.9158	-8.4872	2.0927e-08	4.5336e-07	8.9525	6.1799	6.1712	5.9162	5.8259	5.7148	5.6865
PTMA	0.32926	10.42	8.4831	2.1102e-08	4.5662e-07	8.5787	10.221	10.274	10.413	10.461	10.547	10.606
LONRF1	0.78692	4.1056	8.4814	2.1174e-08	4.5766e-07	9.3149	3.6952	3.5209	4.3342	4.2974	4.3677	4.4181
RP11-74C1.4	-1.6148	1.5489	-8.4663	2.1827e-08	4.7123e-07	9.3975	2.2208	2.4503	1.6315	1.5758	0.63355	0.78146
COX7A2L	-0.46976	7.075	-8.4602	2.2101e-08	4.7659e-07	8.7717	7.2917	7.3208	7.0127	7.1586	6.7704	6.8961
ZNF451	-0.35563	8.7429	-8.4581	2.2194e-08	4.7804e-07	8.6305	8.9432	8.9322	8.6906	8.7301	8.549	8.6126
DBN1	0.63446	4.7088	8.4575	2.222e-08	4.7805e-07	9.1455	4.2765	4.2902	4.9098	4.9428	4.9059	4.9274
GPD1L	0.62941	4.875	8.4511	2.2508e-08	4.8369e-07	9.0892	4.5254	4.4991	4.898	5.0407	5.1614	5.1254
CORO2A	1.345	2.4903	8.4491	2.2602e-08	4.8515e-07	9.4207	1.6016	1.8945	2.6075	2.6421	3.1404	3.0558
ZNRD1ASP	-0.56037	5.2462	-8.4403	2.301e-08	4.9333e-07	8.9571	5.5844	5.4788	5.2887	5.1746	5.0117	4.9388
SURF6	0.47934	5.98	8.4394	2.305e-08	4.9357e-07	8.8705	5.7531	5.682	6.0311	6.0222	6.1718	6.2196
LHPP	-0.74412	4.0186	-8.4389	2.3073e-08	4.9357e-07	9.1797	4.4383	4.3374	4.1125	3.9413	3.6196	3.6627
RAB37	1.2624	2.954	8.4379	2.3122e-08	4.9403e-07	9.3933	1.9516	2.461	3.1312	3.258	3.4303	3.4921
TCEA1	-0.39173	8.4023	-8.4364	2.3192e-08	4.9496e-07	8.6116	8.6213	8.5801	8.3374	8.4588	8.1839	8.2322
S100A11	1.0831	3.0852	8.4271	2.3632e-08	5.0378e-07	9.3625	2.3386	2.4395	3.396	3.3896	3.4894	3.4583
PNP	-0.42446	6.9165	-8.4256	2.3702e-08	5.047e-07	8.7119	7.1122	7.2044	6.8651	6.853	6.7033	6.761
CD58	-0.62337	4.9777	-8.4207	2.3941e-08	5.092e-07	8.9598	5.3079	5.3191	4.9371	4.9477	4.56	4.7946
FAM49B	0.43748	6.8499	8.4143	2.4252e-08	5.1484e-07	8.7104	6.58	6.6229	6.862	6.9594	7.0148	7.0606
PDIA6	0.42338	7.2864	8.4141	2.4261e-08	5.1484e-07	8.6657	7.0719	7.0256	7.2889	7.3901	7.4417	7.5002
AC144652.1	-1.1091	2.6492	-8.4053	2.47e-08	5.2334e-07	9.3176	3.2238	3.1765	2.7725	2.5376	2.0986	2.0861
PRKAB1	-0.43404	6.7764	-8.4049	2.4718e-08	5.2334e-07	8.6824	6.9973	7.0484	6.7565	6.6749	6.6264	6.5549
PSMF1	-0.41079	7.4665	-8.404	2.4764e-08	5.2373e-07	8.6166	7.6714	7.7453	7.3551	7.4353	7.2637	7.3281
SLC3A2	-0.38396	8.0196	-8.3988	2.5025e-08	5.2865e-07	8.5614	8.2437	8.227	8.019	7.9234	7.8726	7.8319
RAG2	1.9723	1.5521	8.3955	2.5196e-08	5.3164e-07	9.0755	0.41033	0.35611	1.8608	1.9921	2.2907	2.4024
RYBP	0.41544	7.5696	8.3925	2.5351e-08	5.3432e-07	8.5952	7.3768	7.284	7.5927	7.6746	7.7173	7.7724
GBGT1	-0.4375	7.0355	-8.3894	2.5512e-08	5.3711e-07	8.6252	7.3206	7.2401	7.0277	6.9341	6.8875	6.8029
KLHL21	-0.51296	5.7386	-8.3822	2.5886e-08	5.4437e-07	8.76	6.0109	6.0068	5.7687	5.6448	5.5548	5.4458
PTPN18	0.59268	5.0299	8.3814	2.5928e-08	5.4463e-07	8.915	4.6331	4.7353	5.172	5.0838	5.2931	5.2624
KCNQ5	0.72799	4.4389	8.3755	2.624e-08	5.5057e-07	9.0132	4.1174	4.0209	4.3604	4.5266	4.8645	4.7434
KLHDC8B	-0.49629	5.5342	-8.3598	2.7094e-08	5.6784e-07	8.7384	5.8195	5.851	5.4273	5.4371	5.2912	5.379
UBXN6	-0.39765	7.3338	-8.3511	2.7576e-08	5.773e-07	8.5172	7.5345	7.6141	7.2587	7.2407	7.1987	7.1563
AES	0.43365	6.6607	8.3456	2.7885e-08	5.8312e-07	8.5879	6.416	6.4153	6.6719	6.7612	6.8591	6.8406
TRAF3	0.6596	4.7808	8.3428	2.8045e-08	5.858e-07	8.8847	4.4876	4.3169	4.8719	4.8709	5.1311	5.0062
PGAM1	0.50332	5.9121	8.3411	2.8143e-08	5.8719e-07	8.6808	5.5347	5.6877	6.0037	6.0203	6.0977	6.1283
GAB2	0.45335	6.4614	8.3359	2.8442e-08	5.9277e-07	8.5918	6.256	6.1516	6.4902	6.5554	6.6597	6.6554
ARHGEF1	0.56143	5.5934	8.335	2.8495e-08	5.9322e-07	8.7165	5.305	5.2592	5.7512	5.5604	5.8229	5.8618
YBX2	-0.42029	7.0137	-8.3261	2.9019e-08	6.0324e-07	8.4942	7.2479	7.275	6.9727	6.8999	6.8888	6.7981
SNHG6	-0.42079	6.5349	-8.3257	2.9042e-08	6.0324e-07	8.5463	6.7427	6.7317	6.5684	6.5323	6.3314	6.3032
ZYX	1.4264	2.3939	8.3243	2.9124e-08	6.0429e-07	9.1657	1.4632	1.5587	2.6458	2.8011	3.0135	2.8813
C10orf54	-0.991	2.9591	-8.3235	2.9171e-08	6.0459e-07	9.1163	3.4658	3.49	2.7897	3.0238	2.5281	2.4571
STK4	0.48109	6.0293	8.3226	2.9224e-08	6.0501e-07	8.624	5.6924	5.7919	6.1121	6.1374	6.1913	6.251
SRGN	0.8947	3.894	8.3213	2.9303e-08	6.0597e-07	9.0347	3.2897	3.3417	4.116	4.2223	4.0952	4.2993
UBN2	-0.49981	6.118	-8.317	2.956e-08	6.1062e-07	8.5708	6.457	6.3529	6.1232	5.961	5.9297	5.8842
WNK3	0.65827	4.8332	8.3016	3.0505e-08	6.2943e-07	8.7829	4.3845	4.5919	4.9352	4.793	5.1667	5.1277
HIST1H2BJ	-0.43903	7.953	-8.2902	3.1225e-08	6.4359e-07	8.3409	8.2429	8.1132	7.9146	7.9749	7.664	7.8082
FNBP1L	-0.98806	2.9589	-8.2791	3.1944e-08	6.5767e-07	9.0253	3.4914	3.4952	2.881	2.9167	2.3594	2.6098
HSPA2	-1.091	5.9069	-8.278	3.2015e-08	6.5841e-07	8.5108	6.6305	6.414	6.1576	5.3655	5.5009	5.3732
RBM3	0.41116	7.5726	8.2774	3.2053e-08	6.5847e-07	8.355	7.326	7.3267	7.6012	7.7103	7.6984	7.7732
DIXDC1	1.0474	3.4239	8.2765	3.2114e-08	6.59e-07	9.0238	2.7062	2.7754	3.883	3.602	3.7925	3.7844
CCDC15	-0.5605	5.1864	-8.2758	3.2157e-08	6.5915e-07	8.6175	5.4573	5.5791	5.1422	5.0169	5.0034	4.9194
FAR2	0.77447	3.9473	8.2704	3.2513e-08	6.6572e-07	8.9007	3.5016	3.5107	4.006	4.1018	4.2936	4.2704
FAM3A	-0.55271	5.2798	-8.2619	3.3088e-08	6.7609e-07	8.5762	5.5616	5.6202	5.3023	5.123	5.0129	5.0586
KHSRP	0.37788	7.985	8.2618	3.3092e-08	6.7609e-07	8.2834	7.7907	7.7987	8.0153	7.9574	8.2109	8.1373
SGPL1	1.3365	2.5221	8.2599	3.3225e-08	6.7807e-07	9.0455	1.7789	1.5587	2.8567	2.9364	2.9653	3.0364
NFKB1	0.61889	4.9688	8.2554	3.3532e-08	6.8359e-07	8.665	4.5353	4.6928	4.9958	5.1265	5.218	5.2441
SLC12A4	-0.51283	5.5	-8.253	3.3695e-08	6.8616e-07	8.5166	5.8154	5.8469	5.4023	5.2901	5.3747	5.2707
SLC39A6	0.61159	4.6973	8.2467	3.4132e-08	6.9428e-07	8.6934	4.3428	4.3998	4.7185	4.7613	4.961	5.0004
BLMH	0.50773	6.0329	8.2379	3.4757e-08	7.0547e-07	8.444	5.7616	5.7435	5.9972	6.1756	6.2508	6.2688
HSPA6	-0.84202	3.3936	-8.2379	3.4757e-08	7.0547e-07	8.8739	3.7726	3.9122	3.3268	3.3343	3.0601	2.9557
MAN2A2	-0.50707	8.5305	-8.2272	3.5527e-08	7.2032e-07	8.1603	8.8718	8.7868	8.5817	8.2948	8.3626	8.2853
CCNE1	-0.47794	5.9668	-8.2221	3.59e-08	7.2707e-07	8.3933	6.1632	6.2921	5.9211	5.9205	5.788	5.7159
DNAJB4	-0.51445	5.2248	-8.2212	3.5965e-08	7.2761e-07	8.505	5.4946	5.4854	5.2363	5.1861	4.9474	4.9987
TUBB2A	-0.39881	6.7623	-8.2175	3.6241e-08	7.3239e-07	8.2904	6.9951	7.0125	6.6783	6.6776	6.6116	6.5989
SAE1	0.39257	7.5569	8.215	3.6427e-08	7.3518e-07	8.2239	7.3152	7.3488	7.5698	7.6601	7.708	7.7396
DDOST	0.42214	7.1193	8.2146	3.6458e-08	7.3518e-07	8.2659	6.8323	6.8967	7.1537	7.2614	7.2676	7.3038
LAMP1	0.4895	6.8761	8.2106	3.6763e-08	7.3975e-07	8.2803	6.5344	6.701	6.8291	6.975	7.1454	7.0718
SP1	-0.42419	6.8816	-8.2106	3.6763e-08	7.3975e-07	8.2648	7.1574	7.0946	6.7608	6.8741	6.6897	6.713
ERMAP	-0.38458	7.1649	-8.2059	3.7117e-08	7.4607e-07	8.2291	7.3844	7.3787	7.0964	7.1358	7.0011	6.9931
KCNK6	0.61737	5.1523	8.2005	3.7531e-08	7.5336e-07	8.5195	4.8067	4.7528	5.1704	5.3878	5.4039	5.3919
ACADS	-0.69843	3.9324	-8.2001	3.7561e-08	7.5336e-07	8.6995	4.3057	4.2842	3.8709	3.9374	3.6071	3.5888
2019-09-08	0.46042	6.561	8.1923	3.8173e-08	7.6482e-07	8.2779	6.2687	6.3414	6.6754	6.5471	6.7968	6.7368
IRAK2	-1.4616	1.7707	-8.1908	3.8287e-08	7.6628e-07	8.8977	2.5586	2.4716	1.9245	1.5556	1.0761	1.038
ATG9A	-0.45312	6.396	-8.1875	3.8547e-08	7.7066e-07	8.2676	6.6007	6.6965	6.3131	6.3689	6.2473	6.1493
ZSCAN16	0.52721	5.756	8.1851	3.8737e-08	7.7316e-07	8.3783	5.3492	5.5406	5.8855	5.819	5.9626	5.9791
CLIP2	-0.6565	4.2286	-8.1849	3.8756e-08	7.7316e-07	8.603	4.64	4.5699	4.1194	4.1277	4.0218	3.893
IFITM2	0.67229	4.4774	8.1824	3.8952e-08	7.7626e-07	8.6163	4.1108	4.0136	4.6159	4.6439	4.7876	4.6925
AARS	-0.36638	8.615	-8.1746	3.9582e-08	7.8797e-07	8.0457	8.8479	8.7788	8.5642	8.6086	8.4001	8.4905
PCSK7	-0.48126	6.417	-8.1689	4.0056e-08	7.9608e-07	8.2225	6.7681	6.6582	6.3942	6.2189	6.2193	6.2436
GNL1	0.42998	6.3507	8.1686	4.0075e-08	7.9608e-07	8.2561	6.0937	6.0814	6.4379	6.4548	6.532	6.5047
DCTPP1	0.57332	4.9828	8.1635	4.0501e-08	8.0368e-07	8.4669	4.7073	4.604	5.0558	5.0749	5.2035	5.2511
ZNF460	-0.51664	7.0881	-8.1584	4.0929e-08	8.1132e-07	8.1337	7.4795	7.2979	7.1076	6.8954	6.9099	6.8384
FAM131A	-0.90801	3.4229	-8.1544	4.1268e-08	8.1717e-07	8.6885	3.9534	3.9277	3.138	3.4095	3.1915	2.9172
FKBP8	-0.34294	8.5129	-8.1529	4.1394e-08	8.1879e-07	8.0079	8.6651	8.7221	8.496	8.4928	8.3508	8.3504
ITGB1	-0.3767	8.7496	-8.1521	4.1465e-08	8.1932e-07	7.9894	8.8858	8.9851	8.7189	8.7939	8.5164	8.5976
SNHG1	-0.35934	8.0699	-8.1472	4.189e-08	8.2685e-07	8.0289	8.2989	8.2412	8.0328	8.0228	7.9335	7.8899
CYB561	0.73373	4.3166	8.1424	4.2306e-08	8.3419e-07	8.5615	3.7851	4.0173	4.4279	4.3904	4.6932	4.586
RGS6	-1.5674	1.3729	-8.1382	4.2672e-08	8.4051e-07	8.7493	2.2451	2.1536	1.312	1.2751	0.58337	0.66793
ZIK1	1.3631	2.3332	8.136	4.2864e-08	8.4341e-07	8.7945	1.5826	1.4769	2.5173	2.6228	2.9406	2.8593
GPR176	-0.7419	4.2843	-8.1324	4.3188e-08	8.4888e-07	8.4792	4.6354	4.7977	4.0023	4.3125	4.017	3.941
ANTXR2	1.1156	3.048	8.1275	4.3622e-08	8.565e-07	8.7661	2.3832	2.1536	3.4457	3.5234	3.4303	3.3521
ZNF551	0.71723	4.1872	8.1263	4.3737e-08	8.5787e-07	8.5537	3.6907	3.8566	4.3135	4.2836	4.4851	4.4939
ARID5B	2.4744	1.0492	8.1229	4.4042e-08	8.6293e-07	8.1612	-0.52648	-0.33577	1.6315	1.4277	2.0896	2.0083
CTH	-0.50978	5.3511	-8.1211	4.4208e-08	8.6528e-07	8.2704	5.5676	5.6968	5.3038	5.2955	5.1169	5.1262
CCDC93	0.61787	4.8838	8.1178	4.4513e-08	8.6998e-07	8.3963	4.5079	4.5068	5.07	4.9564	5.19	5.0715
AK4	0.69258	4.3616	8.1175	4.4541e-08	8.6998e-07	8.516	3.8892	3.8687	4.6256	4.6535	4.5189	4.6137
IRGQ	0.54801	5.2159	8.1166	4.4618e-08	8.7056e-07	8.3221	4.8629	4.9629	5.2379	5.3152	5.4334	5.4834
LPGAT1	0.63224	4.7136	8.1119	4.5058e-08	8.7823e-07	8.4192	4.4063	4.2415	4.8495	4.877	4.9224	4.9852
SYBU	-0.94853	3.0968	-8.108	4.5422e-08	8.844e-07	8.6666	3.5945	3.426	3.248	3.1641	2.6428	2.5051
HNRNPH2	0.46452	6.3156	8.0974	4.6433e-08	9.0314e-07	8.1088	5.9993	6.1029	6.322	6.4383	6.517	6.5138
APH1A	0.47766	5.9109	8.0939	4.6763e-08	9.0806e-07	8.1585	5.6314	5.6439	5.9221	6.0382	6.11	6.1199
OPLAH	-0.61115	5.0366	-8.0937	4.6783e-08	9.0806e-07	8.2729	5.3222	5.3162	5.1981	4.9564	4.7625	4.6642
TCEANC	-1.0251	3.0651	-8.0898	4.7167e-08	9.1457e-07	8.6172	3.4709	3.7818	3.0478	2.8518	2.7376	2.5004
GDI1	-0.58829	5.1189	-8.0836	4.7777e-08	9.2543e-07	8.2242	5.4337	5.4958	5.1048	4.9113	4.961	4.8071
EML4	0.47177	5.7048	8.0794	4.8193e-08	9.3252e-07	8.157	5.4482	5.4456	5.7676	5.7298	5.9196	5.9179
DALRD3	-0.56752	5.3007	-8.0779	4.8345e-08	9.3449e-07	8.1896	5.6611	5.5229	5.384	5.1869	5.0235	5.0261
AKT1S1	-0.46499	5.8118	-8.0723	4.891e-08	9.4443e-07	8.0959	6.1079	6.0543	5.7578	5.7116	5.6629	5.5762
SRPK2	0.58453	4.8974	8.0656	4.9588e-08	9.5654e-07	8.2825	4.5204	4.555	4.9828	5.0847	5.1069	5.1346
RPS12	-0.28902	11.608	-8.0645	4.9701e-08	9.5772e-07	7.6337	11.769	11.74	11.568	11.639	11.456	11.475
IL7	0.81051	3.7648	8.0626	4.9898e-08	9.6052e-07	8.5078	3.272	3.2887	3.883	3.953	4.1371	4.055
PLTP	-0.57307	4.772	-8.058	5.0379e-08	9.6879e-07	8.23	5.1476	5.0957	4.6517	4.6234	4.6281	4.4855
SLC1A5	-0.33732	8.7732	-8.0573	5.045e-08	9.6915e-07	7.7843	8.9719	8.96	8.7396	8.7081	8.6629	8.597
TERF2IP	-0.44593	6.327	-8.0557	5.0623e-08	9.7148e-07	7.9983	6.5	6.6229	6.3368	6.2741	6.0977	6.1306
C21orf58	-0.63958	6.0622	-8.0461	5.1636e-08	9.899e-07	8.0061	6.4433	6.3904	6.1839	5.7944	5.8249	5.7362
MICAL2	-0.4453	5.9978	-8.0411	5.2181e-08	9.9931e-07	8.0044	6.2827	6.2395	5.8734	5.9571	5.8303	5.8035
SNTB2	0.75706	3.9614	8.0376	5.256e-08	1.0055e-06	8.4129	3.4863	3.5711	4.0207	4.1243	4.264	4.302
ZNF692	-0.46678	6.3851	-8.0366	5.2664e-08	1.0065e-06	7.9462	6.6849	6.6535	6.336	6.2221	6.2806	6.1333
PLAG1	-0.52396	5.3118	-8.0291	5.3499e-08	1.0214e-06	8.0838	5.6531	5.5254	5.2917	5.2786	5.0093	5.1123
APOL3	-1.0458	2.6125	-8.0254	5.3905e-08	1.0281e-06	8.5389	3.3471	3.1102	2.3988	2.4361	2.2349	2.1479
FZD6	0.70161	4.4912	8.0246	5.4003e-08	1.0289e-06	8.2793	4.1305	4.0424	4.6014	4.6161	4.6813	4.8753
CREG1	0.42843	6.3214	8.0229	5.4196e-08	1.0316e-06	7.9502	6.0878	6.0411	6.3998	6.416	6.4721	6.5117
LDHB	0.34037	9.4948	8.0194	5.4591e-08	1.038e-06	7.6596	9.2605	9.3433	9.4973	9.5841	9.6342	9.6497
PLCB3	-0.44984	6.4771	-8.0136	5.5249e-08	1.0495e-06	7.888	6.766	6.7201	6.4068	6.374	6.3758	6.22
GAL	1.0978	2.9797	8.0082	5.5878e-08	1.06e-06	8.5086	2.5682	2.2676	2.9592	3.0238	3.6134	3.4461
RELL2	1.0295	3.1486	8.0078	5.5919e-08	1.06e-06	8.4956	2.5192	2.5834	3.3386	3.3163	3.4757	3.6584
TMEM164	0.4416	6.0915	8.0052	5.6221e-08	1.0647e-06	7.9425	5.8594	5.8181	6.1325	6.1768	6.2894	6.2726
TXNDC12	0.579	5.3741	8.0025	5.6542e-08	1.0696e-06	8.059	4.932	5.1245	5.4706	5.5152	5.5326	5.6698
NPM1	0.37232	10.29	7.9981	5.7061e-08	1.0784e-06	7.5645	10.007	10.161	10.283	10.381	10.421	10.489
BTN3A1	0.95021	3.3826	7.995	5.7431e-08	1.0843e-06	8.4409	2.7913	2.784	3.7083	3.5492	3.6865	3.7766
KDM4C	-0.55276	4.903	-7.9929	5.7688e-08	1.088e-06	8.0748	5.2184	5.2062	4.9039	4.7789	4.6173	4.6935
NUDT3	0.4183	6.4988	7.9837	5.8806e-08	1.108e-06	7.8425	6.282	6.238	6.5266	6.5897	6.6759	6.6807
WRN	-0.38868	7.1041	-7.9825	5.8945e-08	1.1095e-06	7.7593	7.3616	7.3109	7.0645	6.9911	6.9612	6.9354
MCMBP	0.44361	6.506	7.9817	5.9043e-08	1.1102e-06	7.8389	6.2311	6.2641	6.5144	6.6462	6.6714	6.7089
ITM2C	1.6164	2.0021	7.9745	5.9935e-08	1.1258e-06	8.4348	1.31	0.78822	2.318	2.2844	2.5802	2.7319
VPS13B	-0.47825	8.2606	-7.9738	6.0033e-08	1.1262e-06	7.6417	8.6265	8.4827	8.2765	8.0255	8.0712	8.0815
TCEB3	0.49365	5.9335	7.9734	6.0075e-08	1.1262e-06	7.8972	5.5773	5.7577	5.9396	6.0064	6.1536	6.1665
MRPS26	0.54488	5.0943	7.9727	6.0168e-08	1.1268e-06	8.0414	4.7799	4.785	5.2173	5.1333	5.2999	5.3504
MTSS1L	0.72552	4.0766	7.9675	6.0823e-08	1.138e-06	8.24	3.6863	3.648	4.1924	4.1346	4.4506	4.3475
CEP170B	1.1119	2.8674	7.9668	6.091e-08	1.1384e-06	8.4414	2.3272	2.0999	3.1177	3.0164	3.2887	3.3547
MRPS2	0.55068	5.7026	7.963	6.1392e-08	1.1463e-06	7.9096	5.5628	5.288	5.6998	5.7087	5.9929	5.9633
MAP1S	0.48283	5.5658	7.9618	6.1554e-08	1.1482e-06	7.9277	5.3506	5.2759	5.602	5.5724	5.8066	5.7875
IRS2	-0.90525	3.9282	-7.95	6.3084e-08	1.1755e-06	8.177	4.4851	4.2752	4.1464	3.6929	3.5462	3.4238
NFIA	-0.38464	7.4564	-7.9488	6.3246e-08	1.1774e-06	7.6568	7.7275	7.6147	7.3989	7.425	7.2756	7.2968
CMTM6	0.53827	5.365	7.9461	6.3607e-08	1.1829e-06	7.9355	5.0611	5.0521	5.3711	5.5204	5.5613	5.6238
ABTB1	-1.1819	2.6283	-7.9432	6.3991e-08	1.1889e-06	8.3806	3.2955	3.0965	2.897	2.4526	2.0064	2.0216
ERCC2	0.48179	5.6578	7.942	6.4147e-08	1.1897e-06	7.8775	5.352	5.3739	5.7892	5.7376	5.8799	5.814
AC007256.5	-1.3911	1.8233	-7.9419	6.4164e-08	1.1897e-06	8.4059	2.7236	2.3956	1.8278	1.6541	1.1641	1.1749
RAPGEF5	0.69408	4.3622	7.935	6.5098e-08	1.2058e-06	8.1096	3.9122	4.0671	4.3604	4.479	4.6251	4.7294
KCNK5	0.47127	5.8871	7.922	6.6893e-08	1.2378e-06	7.7992	5.5725	5.6154	6.0571	5.9489	6.0535	6.0752
SPIN1	0.61962	4.697	7.9198	6.7201e-08	1.2423e-06	8.0126	4.2646	4.3915	4.7606	4.875	4.9275	4.963
UBE2E1	0.46291	6.3996	7.9179	6.7472e-08	1.2461e-06	7.7204	6.1095	6.084	6.4696	6.6187	6.5229	6.5929
SOCS6	0.51272	5.3443	7.9165	6.7671e-08	1.2483e-06	7.8746	5.0593	5.0397	5.3754	5.4693	5.5441	5.5779
SLC35B4	0.78099	3.8798	7.9161	6.7725e-08	1.2483e-06	8.177	3.4449	3.3929	4.0352	4.0229	4.124	4.2592
CHD4	0.33697	8.642	7.9063	6.9125e-08	1.2728e-06	7.4773	8.4295	8.4786	8.6645	8.6993	8.7664	8.8137
MESDC1	2.2121	1.2541	7.9049	6.933e-08	1.2754e-06	7.9613	-0.37036	0.16019	1.794	1.7552	2.0253	2.16
TOMM40	0.39025	7.4615	7.9033	6.9561e-08	1.2783e-06	7.5659	7.2129	7.3314	7.4219	7.4774	7.6743	7.651
SARS	-0.3627	8.0652	-7.9019	6.9774e-08	1.281e-06	7.5071	8.206	8.2952	8.0272	8.0886	7.8741	7.9003
RGS10	-0.64911	4.0508	-7.9007	6.9951e-08	1.2829e-06	8.0446	4.417	4.3859	3.9725	4.0284	3.7362	3.7648
RP5-821D11.7	-1.2378	2.4705	-7.9002	7.0016e-08	1.2829e-06	8.3033	2.9845	3.1958	2.6739	2.2279	1.9872	1.7539
ZCCHC8	-0.4286	6.128	-7.8994	7.0131e-08	1.2838e-06	7.6856	6.3739	6.3883	6.0966	6.005	5.9465	5.9577
PTBP1	0.33957	8.8123	7.8975	7.0411e-08	1.2876e-06	7.4439	8.6589	8.6367	8.8176	8.7825	9.0314	8.9465
DPM2	-0.49027	5.6386	-7.8924	7.1173e-08	1.3003e-06	7.7365	5.9786	5.8702	5.5049	5.6011	5.4847	5.3919
PKN3	0.67722	4.3461	7.8896	7.1595e-08	1.3067e-06	8.0197	3.9754	3.9392	4.4279	4.4492	4.7123	4.5726
NOMO1	0.59634	5.1916	7.8788	7.3229e-08	1.3352e-06	7.8273	4.9469	4.7419	5.2237	5.3611	5.3939	5.4822
SEC23IP	0.48018	5.9331	7.876	7.3672e-08	1.342e-06	7.6904	5.6622	5.6579	6.0607	5.943	6.0899	6.1847
SMAD3	0.63736	4.5813	7.8719	7.4304e-08	1.3522e-06	7.9311	4.2911	4.1487	4.7117	4.6124	4.8995	4.8242
TDRD7	1.4215	2.3772	7.8713	7.4396e-08	1.3525e-06	8.262	1.31	1.655	2.7374	2.7925	2.7716	2.9966
SLC9A7	0.68082	4.6163	7.8677	7.4957e-08	1.3614e-06	7.9237	4.3143	4.0948	4.7207	4.8091	4.8096	4.9492
CALCOCO2	-0.43148	6.5886	-7.8646	7.5452e-08	1.3691e-06	7.5602	6.7744	6.8609	6.5324	6.5981	6.3271	6.4385
ZDHHC17	-0.50343	5.7351	-7.861	7.6024e-08	1.3781e-06	7.6576	6.0785	5.9425	5.7676	5.6103	5.4839	5.5277
CCAR2	0.37042	7.2944	7.8494	7.7896e-08	1.4107e-06	7.4674	7.1027	7.0812	7.307	7.3521	7.448	7.4755
HIST1H2BO	-0.35238	7.8149	-7.8476	7.8194e-08	1.4147e-06	7.4091	8.0128	8.0128	7.8058	7.7369	7.6611	7.6598
GPD2	0.56055	4.9158	7.8402	7.9421e-08	1.4343e-06	7.805	4.5129	4.555	5.1065	5.1367	5.0641	5.1193
PTPRS	1.2981	2.4811	7.8398	7.949e-08	1.4343e-06	8.2005	1.5634	1.9102	2.7725	2.5632	3.0738	3.0033
EPHX1	-0.51868	4.9192	-7.8397	7.9508e-08	1.4343e-06	7.7409	5.1983	5.2668	4.793	4.8272	4.7283	4.7018
PPIP5K2	-0.33087	8.4936	-7.8386	7.9695e-08	1.4363e-06	7.3366	8.6951	8.6543	8.4602	8.4657	8.3218	8.3643
CDK11A	-1.1812	2.1678	-7.8353	8.0251e-08	1.4449e-06	8.1864	2.7579	2.8424	2.194	1.9693	1.6397	1.6032
RASSF5	0.62612	4.5596	7.8316	8.0869e-08	1.4546e-06	7.8538	4.1944	4.1651	4.6327	4.7469	4.8393	4.779
CD164	0.34145	8.2855	7.8246	8.2084e-08	1.4751e-06	7.3301	8.0674	8.0809	8.3361	8.3986	8.4019	8.4282
FAM92A1	1.1796	2.7491	7.8239	8.2201e-08	1.4757e-06	8.154	2.2208	1.9713	3.0115	2.7485	3.2328	3.3094
PHGDH	0.45743	5.871	7.8218	8.2563e-08	1.4808e-06	7.5936	5.5235	5.5469	6.0801	6.095	5.9564	6.0243
RPS11	-0.30152	10.67	-7.8147	8.3799e-08	1.5015e-06	7.1455	10.785	10.839	10.681	10.698	10.468	10.55
DOCK6	1.1468	3.0307	7.8127	8.4169e-08	1.5067e-06	8.1114	2.4684	2.1926	3.4403	3.1405	3.4196	3.5227
KIF13B	0.61079	5.6648	7.8097	8.4688e-08	1.5146e-06	7.5963	5.3879	5.2376	5.8865	5.6201	5.9887	5.8678
PIK3CG	1.0663	2.8656	7.8022	8.605e-08	1.5374e-06	8.1019	2.1708	2.2553	3.1312	3.0886	3.2409	3.3067
AKT1	0.38975	6.8856	7.801	8.6271e-08	1.5399e-06	7.4046	6.65	6.6857	6.9403	6.9193	7.09	7.0281
FAM136A	0.48897	5.5646	7.7983	8.6757e-08	1.5471e-06	7.5831	5.2489	5.3059	5.6056	5.6984	5.7408	5.788
HS2ST1	0.49176	5.88	7.7956	8.7246e-08	1.5543e-06	7.5279	5.6128	5.5606	5.8895	6.0609	6.0712	6.0851
ARHGEF11	1.5082	2.1714	7.7947	8.7418e-08	1.5559e-06	8.0925	1.2391	1.1732	2.6646	2.4851	2.848	2.6186
U91328.2	-0.77916	3.5205	-7.7934	8.7651e-08	1.5586e-06	7.9338	3.8737	3.8687	3.6716	3.5363	3.0509	3.122
CD81	0.53533	5.4564	7.7923	8.7864e-08	1.5609e-06	7.5851	5.1983	5.1544	5.384	5.5805	5.6943	5.7271
PDIA3	0.39634	7.4146	7.7897	8.834e-08	1.5665e-06	7.3272	7.2005	7.2036	7.3767	7.5122	7.5719	7.6226
RPS19	-0.28195	10.386	-7.7897	8.8348e-08	1.5665e-06	7.1065	10.527	10.527	10.382	10.393	10.249	10.241
TRAK2	-0.3419	7.8776	-7.7834	8.9526e-08	1.5859e-06	7.2652	8.0618	8.08	7.8135	7.8524	7.7291	7.7289
GOLGA4	-0.35908	7.3652	-7.781	8.9979e-08	1.5924e-06	7.3036	7.5693	7.5648	7.3395	7.3032	7.1917	7.2228
BSDC1	-0.37555	7.1021	-7.7767	9.0801e-08	1.6039e-06	7.3165	7.3335	7.3274	7.0623	6.9797	6.9572	6.9528
MARK3	-0.37359	7.0997	-7.7767	9.0802e-08	1.6039e-06	7.3165	7.3444	7.3142	7.0462	6.9807	6.9679	6.9448
ZBTB38	1.0219	2.952	7.7743	9.1265e-08	1.6106e-06	8.0271	2.3721	2.4178	2.9592	3.1235	3.4409	3.3986
FAM20B	-0.39664	7.2639	-7.7719	9.1724e-08	1.6171e-06	7.2932	7.4542	7.5105	7.1796	7.2723	7.0345	7.1321
NPTX1	1.2124	2.6344	7.7711	9.1881e-08	1.6184e-06	8.0567	1.8118	1.9102	3.062	2.8642	3.1185	3.0396
C1RL-AS1	0.75729	3.9879	7.7687	9.235e-08	1.6251e-06	7.8403	3.4965	3.6004	4.2053	4.0136	4.311	4.3006
TPM3	0.39392	8.3145	7.7658	9.2932e-08	1.6338e-06	7.2016	8.005	8.1317	8.3752	8.4551	8.4047	8.5151
ICAM5	-0.5646	6.3368	-7.7628	9.3517e-08	1.6415e-06	7.3639	6.6855	6.6412	6.3622	6.1189	6.228	5.985
GADD45G	-1.6087	2.8596	-7.7626	9.3548e-08	1.6415e-06	7.9772	3.7809	3.5158	3.356	2.3446	2.3139	1.8463
RP1-102K2.9	-1.2168	2.03	-7.752	9.567e-08	1.6772e-06	8.0175	2.8401	2.6409	1.794	1.8161	1.6641	1.425
HIST3H2A	-0.64854	4.5686	-7.748	9.6495e-08	1.6901e-06	7.6121	5.0576	4.8082	4.5056	4.4897	4.1926	4.358
SMG1P4	-0.89239	4.2611	-7.7467	9.6758e-08	1.6931e-06	7.6542	4.9506	4.6769	4.3015	3.7674	4.0288	3.8416
DNAJC13	0.38815	6.7487	7.7457	9.6969e-08	1.6952e-06	7.3	6.5044	6.5566	6.7922	6.8031	6.9064	6.9295
TAOK3	0.39189	6.726	7.7338	9.9443e-08	1.7368e-06	7.2773	6.5151	6.4903	6.763	6.8007	6.8686	6.9182
KLHL6	0.55552	5.0399	7.7245	1.0142e-07	1.7697e-06	7.5216	4.6695	4.7593	5.1753	5.1057	5.2118	5.3179
REEP6	-0.66426	4.0662	-7.7117	1.042e-07	1.8165e-06	7.6371	4.4462	4.3942	4.0709	3.953	3.8387	3.6941
OFD1	-0.43421	5.7115	-7.7004	1.0674e-07	1.859e-06	7.3139	5.9455	5.9727	5.6511	5.652	5.5093	5.5381
BAHD1	0.49596	5.1961	7.6934	1.0832e-07	1.8848e-06	7.4138	4.958	4.9363	5.1802	5.2155	5.4431	5.4433
C5AR2	1.0353	3.3509	7.6911	1.0886e-07	1.8925e-06	7.8264	2.7663	2.4395	3.9265	3.6929	3.6412	3.6392
HELB	0.65428	4.2826	7.6905	1.09e-07	1.8931e-06	7.5944	4.0325	3.8926	4.2864	4.2588	4.5697	4.6558
YY1AP1	-0.4733	6.1403	-7.6898	1.0916e-07	1.8941e-06	7.234	6.4472	6.3319	6.0914	6.1267	6.009	5.8357
FAM213A	1.2384	2.681	7.6795	1.1158e-07	1.9343e-06	7.8664	1.693	2.0583	2.9968	3.1371	3.0276	3.1734
GSDMB	-0.91632	2.8976	-7.6727	1.1321e-07	1.9602e-06	7.7708	3.4237	3.359	2.9128	2.7261	2.5214	2.4424
HIST3H2BB	-0.55906	4.7744	-7.6723	1.1331e-07	1.9602e-06	7.4167	5.0576	5.0433	4.8226	4.7244	4.5681	4.4306
CASK	0.78308	3.7526	7.6719	1.1339e-07	1.9602e-06	7.6706	3.2299	3.4689	3.8215	3.734	4.1262	4.135
MYL12A	0.42473	6.9194	7.6687	1.1417e-07	1.9718e-06	7.1132	6.6659	6.7328	6.8646	7.0093	7.0833	7.1608
HPGDS	2.4593	1.48	7.6668	1.1464e-07	1.9781e-06	7.4877	-0.44631	0.051257	2.294	2.5325	2.0159	2.4325
FKBP1A	0.49446	5.3704	7.6645	1.152e-07	1.986e-06	7.327	5.0576	5.1059	5.4134	5.4967	5.5523	5.5963
DGKZ	0.45348	6.2343	7.662	1.1581e-07	1.9947e-06	7.1794	5.9704	6.0482	6.2914	6.1656	6.5099	6.4202
PYCR1	-0.3478	7.7451	-7.6605	1.1619e-07	1.9994e-06	7.0101	7.9104	7.9441	7.7571	7.6991	7.5954	7.5647
MLLT1	0.45593	5.8398	7.6578	1.1686e-07	2.0079e-06	7.2267	5.5773	5.6485	5.8663	5.8046	6.1105	6.0316
RFTN1	0.74591	3.9703	7.6576	1.169e-07	2.0079e-06	7.6054	3.5266	3.5463	4.1892	4.0024	4.25	4.3074
C12orf65	-0.46796	5.2784	-7.6565	1.1719e-07	2.0109e-06	7.285	5.5408	5.5656	5.2157	5.1812	5.0664	5.1007
ANKRD12	-0.40809	6.2192	-7.6543	1.1772e-07	2.0183e-06	7.1461	6.4873	6.4133	6.1551	6.1768	6.0273	6.0556
MAGED1	0.64398	4.5016	7.652	1.183e-07	2.0264e-06	7.483	4.1305	4.0706	4.5718	4.7491	4.7355	4.7524
KCNK1	-0.55872	4.7134	-7.6468	1.1963e-07	2.0472e-06	7.3703	5.0473	4.976	4.6797	4.6876	4.3733	4.5163
RHOQ	0.95042	3.3373	7.6445	1.2021e-07	2.0547e-06	7.703	2.895	2.6872	3.605	3.3578	3.7159	3.7628
BACH1	-0.36213	7.2688	-7.6439	1.2038e-07	2.0547e-06	7.0152	7.473	7.4471	7.2183	7.28	7.0819	7.1126
PPM1G	0.384	7.1981	7.6438	1.204e-07	2.0547e-06	7.0308	6.9674	7.0084	7.1808	7.2895	7.3572	7.3852
CEP44	-0.43386	5.7239	-7.6327	1.2327e-07	2.1018e-06	7.1642	5.9813	5.9708	5.686	5.6231	5.5276	5.5547
HNRNPU	0.31107	9.5216	7.6308	1.2377e-07	2.1084e-06	6.8169	9.3711	9.3335	9.514	9.5851	9.6414	9.6841
MOB3C	-0.55919	4.6103	-7.6283	1.2445e-07	2.118e-06	7.3456	4.9055	4.9553	4.5842	4.4857	4.3207	4.4106
SMARCC1	0.37295	7.5676	7.6132	1.285e-07	2.185e-06	6.9291	7.3661	7.3666	7.566	7.6329	7.6864	7.7877
ATF4	-0.30492	9.0853	-7.6118	1.2891e-07	2.1899e-06	6.8018	9.2118	9.2474	9.0929	9.1112	8.9128	8.9356
FAM46C	-0.40134	7.1383	-7.6113	1.2903e-07	2.19e-06	6.9552	7.4162	7.299	7.0812	7.1259	6.901	7.0067
OSBPL3	0.38903	6.9437	7.6107	1.292e-07	2.1909e-06	6.9851	6.7692	6.6783	7.0085	6.9771	7.1449	7.0841
ZC3H4	0.41989	6.2798	7.6102	1.2934e-07	2.1913e-06	7.0578	6.0425	6.1266	6.2708	6.2269	6.539	6.473
FAM198B	2.5887	0.90869	7.6082	1.2988e-07	2.1985e-06	7.0524	-0.37036	-1.0976	1.5731	1.6155	1.9078	1.8237
KIF5A	-0.81894	3.6497	-7.6063	1.3042e-07	2.2055e-06	7.4758	4.2284	4.1287	3.6339	3.1906	3.3463	3.3703
TGIF2	0.76178	3.7732	7.6053	1.307e-07	2.2082e-06	7.5349	3.3583	3.2706	3.887	3.9607	4.1174	4.0453
FAM184B	1.1858	2.6636	7.6019	1.3166e-07	2.2226e-06	7.6998	1.7621	2.1797	2.9128	2.8351	3.0919	3.1999
HIST1H2AG	-0.43568	9.0348	-7.6002	1.3212e-07	2.2282e-06	6.7798	9.3241	9.1677	9.0364	9.0681	8.6947	8.9177
TNFRSF1A	0.68831	4.0718	7.5982	1.3271e-07	2.2362e-06	7.4534	3.7258	3.6101	4.1497	4.2303	4.3622	4.3527
HNRNPDL	0.35503	7.7026	7.5936	1.34e-07	2.2559e-06	6.8728	7.5234	7.5236	7.7428	7.666	7.9068	7.8526
CYB5R1	-0.5607	4.6154	-7.587	1.359e-07	2.2843e-06	7.2567	4.9745	4.8757	4.6184	4.4951	4.3603	4.3684
CRYZ	0.73287	3.8443	7.5869	1.3593e-07	2.2843e-06	7.4781	3.4237	3.3984	4.0134	3.9355	4.1736	4.1212
PGF	-1.9361	0.45914	-7.5849	1.3651e-07	2.292e-06	7.4597	1.5241	1.655	0.27579	0.010839	-0.40392	-0.30697
CFAP161	0.79852	3.8207	7.5774	1.3874e-07	2.3273e-06	7.4509	3.429	3.4314	3.9535	3.6529	4.2277	4.2295
RNPEP	0.66309	4.4319	7.5746	1.3957e-07	2.3391e-06	7.3252	3.9386	4.1586	4.4659	4.6026	4.734	4.6915
ELOVL6	0.41668	7.4659	7.5729	1.4009e-07	2.3457e-06	6.8519	7.2324	7.2218	7.4469	7.6116	7.5867	7.6961
DAAM1	-0.49737	5.1285	-7.5635	1.4293e-07	2.3912e-06	7.1089	5.4324	5.3908	5.1202	4.9945	4.9387	4.8944
LIPA	0.57053	4.9604	7.5584	1.4448e-07	2.413e-06	7.1871	4.6028	4.555	5.0979	5.2179	5.0879	5.201
AP2A1	-0.35351	7.5519	-7.5584	1.445e-07	2.413e-06	6.8003	7.7896	7.748	7.4698	7.4693	7.4574	7.377
ARHGAP18	0.48964	5.3239	7.5518	1.4656e-07	2.4453e-06	7.0892	5.0403	5.0397	5.3524	5.4516	5.5293	5.53
NBL1	1.1321	2.6517	7.551	1.4682e-07	2.4465e-06	7.5962	1.9367	1.9257	2.9284	3.009	3.004	3.1065
DCTN1	0.41329	6.3355	7.5506	1.4692e-07	2.4465e-06	6.9251	6.0995	6.1106	6.3338	6.43	6.5398	6.499
CDCA7	0.43119	5.9417	7.5503	1.4703e-07	2.4465e-06	6.9813	5.7306	5.6532	6.0175	5.9999	6.1423	6.1067
NLN	0.57487	4.6203	7.5463	1.483e-07	2.4655e-06	7.2075	4.2882	4.3942	4.5989	4.6026	4.9536	4.8844
IKBKE	1.975	1.2915	7.5377	1.5106e-07	2.5091e-06	7.3837	0.53406	-0.1949	1.553	1.5657	2.1251	2.166
OSBPL2	-0.46141	5.4769	-7.5344	1.5212e-07	2.5244e-06	6.99	5.7176	5.7303	5.5023	5.3843	5.2744	5.2525
PNPLA2	-0.55703	4.8133	-7.5314	1.5311e-07	2.5386e-06	7.0955	5.1999	5.0521	4.7207	4.7513	4.6512	4.5045
LUZP1	0.68864	4.0867	7.5308	1.5329e-07	2.5394e-06	7.3049	3.6319	3.7342	4.1729	4.2493	4.3226	4.4093
GNG2	0.56823	5.1849	7.5301	1.5354e-07	2.5413e-06	7.0755	4.8108	4.8637	5.2141	5.4183	5.3552	5.4476
KIAA0100	0.33866	7.7351	7.5232	1.5583e-07	2.5757e-06	6.7157	7.5828	7.5357	7.7489	7.7485	7.8851	7.9098
ADCK3	-0.4198	6.2549	-7.523	1.559e-07	2.5757e-06	6.8558	6.4577	6.4987	6.2073	6.2412	6.1249	5.9997
SPSB3	-0.49541	5.2649	-7.5203	1.5678e-07	2.5858e-06	6.992	5.5494	5.533	5.2933	5.1247	5.0294	5.0594
OAF	1.2162	2.5686	7.5203	1.5679e-07	2.5858e-06	7.5335	1.9809	1.7797	2.7463	2.6707	3.2409	2.9932
TSN	0.38836	6.7308	7.517	1.5792e-07	2.5996e-06	6.8027	6.5	6.5295	6.746	6.8066	6.8683	6.9345
GAPVD1	-0.37876	7.1324	-7.5167	1.5801e-07	2.5996e-06	6.748	7.3145	7.3769	7.0838	7.0912	6.9099	7.0184
ZMIZ1	-0.77501	3.4864	-7.5166	1.5804e-07	2.5996e-06	7.3317	3.9827	3.8362	3.5198	3.3042	3.1534	3.122
TSPAN4	-0.56925	4.3671	-7.5108	1.6003e-07	2.63e-06	7.1421	4.674	4.6677	4.343	4.3065	4.1371	4.0742
KIFC2	-0.69929	5.6983	-7.5092	1.6057e-07	2.6347e-06	6.8907	6.1648	6.064	5.7956	5.3204	5.5093	5.3359
CAPZB	0.39557	6.3936	7.5091	1.6061e-07	2.6347e-06	6.8264	6.1496	6.1882	6.4372	6.4603	6.5419	6.5845
VAV3	1.1427	2.4967	7.5087	1.6074e-07	2.6347e-06	7.5119	1.8599	1.83	2.6458	2.6565	3.0323	2.9557
CYTL1	0.66115	4.1957	7.5065	1.615e-07	2.6449e-06	7.2303	3.76	3.828	4.3254	4.3394	4.5122	4.4093
FAM83D	-0.39936	6.194	-7.5024	1.6295e-07	2.6662e-06	6.8183	6.4254	6.3925	6.1888	6.1408	5.9893	6.0275
PEA15	0.77722	3.8319	7.5003	1.6369e-07	2.6759e-06	7.299	3.3583	3.359	3.9147	4.07	4.2134	4.0758
TGFB1	0.48383	5.4309	7.4949	1.656e-07	2.7049e-06	6.9452	5.203	5.0974	5.5486	5.4659	5.6462	5.6243
E2F4	-0.33981	7.9239	-7.4893	1.6761e-07	2.7352e-06	6.618	8.0799	8.1713	7.8512	7.8699	7.7856	7.7857
ELMO3	-0.71582	3.9729	-7.4836	1.6967e-07	2.7664e-06	7.1485	4.4224	4.4109	3.9342	3.6409	3.8117	3.6175
FRYL	-0.34869	7.3579	-7.4822	1.7016e-07	2.7721e-06	6.6524	7.5711	7.5205	7.341	7.319	7.2132	7.1826
TMX1	0.40762	6.5561	7.4796	1.7115e-07	2.7857e-06	6.7396	6.3676	6.318	6.5137	6.6372	6.7399	6.7602
PFKL	0.35907	7.756	7.4757	1.7258e-07	2.8065e-06	6.6109	7.5274	7.579	7.8406	7.7612	7.9512	7.8763
RCHY1	0.61686	4.3712	7.4745	1.7303e-07	2.8113e-06	7.1226	3.9935	3.9806	4.5618	4.479	4.6251	4.5871
HIST1H2BE	-0.34655	7.2359	-7.4741	1.7317e-07	2.8113e-06	6.6472	7.4041	7.4048	7.2486	7.2415	7.0665	7.0501
F11R	-0.48828	5.22	-7.4623	1.7763e-07	2.8811e-06	6.875	5.4029	5.5544	5.19	5.1919	4.9974	4.9835
GOT2	0.37455	6.7696	7.4606	1.7827e-07	2.8891e-06	6.672	6.5625	6.5941	6.7493	6.8071	6.9429	6.9616
SNX14	0.42245	6.2422	7.4518	1.817e-07	2.942e-06	6.7234	6.0382	5.9349	6.3116	6.354	6.3717	6.4428
DICER1	0.37366	6.9534	7.4454	1.8423e-07	2.9804e-06	6.6219	6.719	6.741	6.983	7.0695	7.1107	7.0972
RBBP9	1.1238	2.6084	7.4404	1.8624e-07	3.0103e-06	7.3626	1.8281	2.0583	2.7897	2.8559	3.0182	3.1003
TCEAL8	0.74919	3.837	7.4391	1.8674e-07	3.0158e-06	7.1645	3.3749	3.3816	3.9762	4.0521	4.0497	4.1875
VCL	0.44006	5.9104	7.4294	1.9071e-07	3.0772e-06	6.7154	5.7045	5.6775	5.849	5.9715	6.1111	6.1489
REPS1	0.69556	4.1339	7.4255	1.9232e-07	3.1006e-06	7.0645	3.6996	3.769	4.1329	4.3394	4.4471	4.4156
DPY19L3	0.47415	5.4248	7.421	1.9418e-07	3.1279e-06	6.786	5.1604	5.1093	5.5762	5.4834	5.6184	5.6013
TRAM1	0.44354	7.0541	7.419	1.9503e-07	3.1389e-06	6.5556	6.8197	6.746	7.079	7.234	7.1468	7.2992
VPS8	-0.45719	5.5442	-7.4178	1.9554e-07	3.1429e-06	6.7199	5.8515	5.7663	5.5282	5.412	5.3719	5.3352
FAM35A	0.42576	5.8168	7.4176	1.9562e-07	3.1429e-06	6.7071	5.5713	5.5865	5.8449	5.8905	5.9953	6.0127
PGAM5	0.43085	6.3306	7.409	1.9928e-07	3.199e-06	6.6127	6.0751	6.1366	6.2708	6.4286	6.5324	6.5402
VIL1	-1.9335	0.85158	-7.4025	2.0213e-07	3.2419e-06	7.1745	1.7451	1.9102	1.1876	0.55048	-0.35417	0.070261
ZNF395	0.57102	4.8521	7.3998	2.0332e-07	3.2581e-06	6.8537	4.4117	4.6016	4.9294	5.0215	5.0469	5.1014
HIST1H4B	-0.3723	7.9363	-7.3994	2.035e-07	3.2582e-06	6.4198	8.2124	8.0551	7.8768	7.9492	7.7696	7.7545
GPAT4	0.36073	7.2279	7.3988	2.0376e-07	3.2596e-06	6.4879	7.0314	7.0479	7.2388	7.2445	7.4459	7.3589
LMAN1	0.35548	7.7334	7.3966	2.0473e-07	3.2723e-06	6.4377	7.4957	7.5774	7.7317	7.8137	7.8695	7.9125
HSD17B12	0.42736	6.054	7.396	2.0498e-07	3.2735e-06	6.6302	5.7382	5.8077	6.1708	6.212	6.1574	6.2379
SUPT16H	0.3468	8.2097	7.3923	2.0663e-07	3.2971e-06	6.3882	7.9604	8.0757	8.2247	8.2702	8.3369	8.3903
STARD3NL	0.68937	4.182	7.3899	2.077e-07	3.3113e-06	6.9762	3.7344	3.8362	4.1924	4.3688	4.5322	4.4281
S100A10	0.67545	4.2886	7.3861	2.0943e-07	3.3361e-06	6.9472	3.9311	3.8485	4.4086	4.434	4.4593	4.6504
GYG1	0.62837	4.6214	7.3765	2.1381e-07	3.4029e-06	6.8527	4.2735	4.2228	4.6208	4.8596	4.8684	4.8835
RP11-147L13.11	1.3067	2.2527	7.3751	2.1445e-07	3.4102e-06	7.2403	1.5634	1.2977	2.5173	2.6421	2.8048	2.691
SGPP1	0.37083	6.895	7.3705	2.1663e-07	3.4419e-06	6.4608	6.6585	6.7184	6.9071	6.969	7.0453	7.0718
NDC1	0.40421	6.6248	7.3667	2.1839e-07	3.4669e-06	6.484	6.3495	6.4459	6.6496	6.7054	6.7524	6.8462
PGD	-0.3404	8.0827	-7.3632	2.2009e-07	3.4909e-06	6.3288	8.2378	8.2656	8.0349	8.1374	7.8866	7.9339
MTDH	0.31642	8.4626	7.3627	2.203e-07	3.4913e-06	6.301	8.304	8.3039	8.4277	8.4995	8.6158	8.6246
PGK1	0.38483	8.3066	7.3608	2.2124e-07	3.5032e-06	6.3119	8.0454	8.1217	8.2988	8.4417	8.4064	8.5254
TXNDC16	-0.44262	5.4663	-7.3577	2.2272e-07	3.5237e-06	6.6034	5.7306	5.674	5.4273	5.4516	5.2272	5.2873
ERP44	0.44414	5.9123	7.3557	2.2369e-07	3.536e-06	6.5575	5.5761	5.738	5.9682	5.9895	6.1061	6.0958
ETV5	1.0359	2.8293	7.3539	2.2458e-07	3.5471e-06	7.153	2.0924	2.3956	2.9516	2.994	3.2247	3.3175
STT3A	0.37623	7.3053	7.3496	2.2668e-07	3.5771e-06	6.3735	7.0345	7.1468	7.3122	7.4063	7.4566	7.4758
PPM1F	0.60338	4.4257	7.3479	2.2753e-07	3.5861e-06	6.823	4.0941	4.0948	4.4113	4.5575	4.7006	4.6956
WT1-AS	0.73635	3.9833	7.3476	2.2763e-07	3.5861e-06	6.9371	3.5658	3.4636	4.1022	4.2478	4.3302	4.1904
DBNL	0.40633	6.3001	7.3465	2.2819e-07	3.592e-06	6.4829	6.0029	6.0944	6.3629	6.4317	6.4477	6.4609
CTDSP1	0.43311	6.1291	7.3433	2.298e-07	3.6142e-06	6.4934	5.9165	5.9029	6.1418	6.1194	6.4189	6.275
CUL1	0.38616	6.4802	7.337	2.3296e-07	3.6608e-06	6.4345	6.2372	6.2966	6.4961	6.5471	6.6368	6.6673
FAM78A	0.60587	4.3433	7.3366	2.3317e-07	3.6611e-06	6.8221	3.9311	4.0317	4.4444	4.4763	4.6016	4.5748
ASH1L	-0.40266	6.5567	-7.3359	2.3352e-07	3.6634e-06	6.4065	6.7744	6.7858	6.5734	6.4466	6.4239	6.3361
PVR	0.61745	4.6695	7.332	2.3552e-07	3.6917e-06	6.7421	4.368	4.2477	4.8495	4.6865	5.001	4.8643
FGFR1OP2	-0.39017	6.385	-7.3285	2.3731e-07	3.7167e-06	6.4101	6.6368	6.5646	6.3779	6.312	6.1881	6.2308
AKR1B1	1.3393	2.2227	7.3273	2.3793e-07	3.7233e-06	7.1397	1.2146	1.8135	2.2573	2.3328	2.9155	2.8028
KIAA0430	-0.39669	5.9477	-7.3257	2.3873e-07	3.7281e-06	6.4572	6.1964	6.1696	5.8825	5.8645	5.7901	5.7832
ZMYM4	0.4317	6.1536	7.3255	2.3882e-07	3.7281e-06	6.453	5.9231	5.9156	6.1274	6.2582	6.3079	6.3895
AXL	1.0459	3.2703	7.3255	2.3884e-07	3.7281e-06	7.0515	2.269	2.8424	3.6576	3.6742	3.5264	3.652
KLF3	-0.35552	7.0352	-7.3224	2.4048e-07	3.7505e-06	6.3276	7.2707	7.2	6.9746	7.0051	6.8901	6.8709
SLC7A8	-0.57292	4.2281	-7.3184	2.4258e-07	3.7801e-06	6.7366	4.6469	4.5425	4.0603	4.0789	4.0028	4.0372
EIF4A2	-0.38918	9.3705	-7.3177	2.429e-07	3.782e-06	6.1298	9.7184	9.4719	9.3044	9.3167	9.1949	9.2168
UMPS	0.42686	5.949	7.3131	2.4535e-07	3.817e-06	6.4568	5.7252	5.6809	5.9776	6.0455	6.1707	6.0942
SLC9A1	-0.83394	3.4184	-7.31	2.4704e-07	3.84e-06	6.8977	3.8658	3.8403	3.5353	3.1972	3.1404	2.9313
XRN1	-0.37384	6.3819	-7.3084	2.4788e-07	3.8499e-06	6.3646	6.599	6.6049	6.3287	6.3006	6.2437	6.2142
NAPA	-0.398	6.0783	-7.3021	2.513e-07	3.8998e-06	6.389	6.279	6.3239	6.0428	6.0129	5.9378	5.8733
RP11-379K17.4	-1.3512	1.4152	-7.2944	2.5559e-07	3.9613e-06	7.0644	2.158	2.1926	1.2635	1.2247	0.84	0.81232
ZNF75A	0.63485	4.1895	7.2942	2.5569e-07	3.9613e-06	6.7551	3.8341	3.8687	4.2925	4.1766	4.4523	4.5128
STK26	0.39718	6.5456	7.2899	2.581e-07	3.9949e-06	6.3249	6.3453	6.2596	6.5845	6.6843	6.7004	6.6994
HIST1H4E	-0.323	9.0325	-7.2895	2.5829e-07	3.9949e-06	6.0923	9.258	9.1376	9.0231	9.0283	8.8445	8.9032
RPL10	-0.28309	10.265	-7.2876	2.5936e-07	4.0082e-06	6.0086	10.377	10.436	10.231	10.299	10.128	10.119
TMEM201	0.61081	4.1983	7.2869	2.5977e-07	4.0112e-06	6.735	3.8853	3.8647	4.2371	4.2287	4.4971	4.4771
TBC1D2B	1.1268	2.4108	7.2825	2.6226e-07	4.0447e-06	7.032	1.9516	1.7967	2.294	2.4361	2.9406	3.0461
MICAL1	0.69649	4.0618	7.2823	2.6238e-07	4.0447e-06	6.7625	3.6412	3.7075	4.1564	4.1035	4.4714	4.2911
ZER1	-0.47045	5.0805	-7.2809	2.6322e-07	4.0544e-06	6.4978	5.3006	5.3725	5.0487	5.0252	4.8892	4.8467
KTN1	0.34912	7.7841	7.2796	2.6396e-07	4.0624e-06	6.1742	7.5283	7.6257	7.824	7.8772	7.8961	7.9534
PDCD11	0.34087	7.3968	7.2717	2.6853e-07	4.1293e-06	6.1886	7.2179	7.2335	7.3735	7.4245	7.5471	7.5843
GPR160	1.2659	2.3065	7.2708	2.6905e-07	4.1339e-06	7.0207	1.6752	1.3901	2.5681	2.6325	2.7028	2.8703
MORC3	-0.32318	7.8464	-7.268	2.7071e-07	4.1561e-06	6.1349	8.0037	8.0429	7.8019	7.8311	7.6838	7.7149
FAM73B	-0.44003	6.9585	-7.2663	2.7169e-07	4.1676e-06	6.2094	7.2381	7.1702	7.0122	6.7961	6.8217	6.7125
ENDOD1	-0.58709	4.2263	-7.2621	2.7424e-07	4.2032e-06	6.6134	4.5451	4.6444	4.0023	4.1532	4.0004	4.0125
RIMS3	-1.0046	2.6074	-7.2589	2.7612e-07	4.2287e-06	6.9249	3.2541	3.0406	2.4321	2.5834	2.3062	2.0282
CENPB	0.41954	5.7727	7.2582	2.7655e-07	4.2294e-06	6.359	5.516	5.5767	5.802	5.8099	5.9675	5.9641
HIST1H4H	0.38975	7.3595	7.2581	2.7662e-07	4.2294e-06	6.165	7.1974	7.0734	7.3781	7.4624	7.4709	7.5752
ZFYVE16	0.68315	4.2145	7.2546	2.7874e-07	4.2583e-06	6.6687	3.8815	3.7861	4.1696	4.4088	4.5486	4.4927
EIF3B	0.32036	8.4301	7.2539	2.7918e-07	4.2587e-06	6.0601	8.2338	8.3287	8.3925	8.4218	8.6129	8.5909
CEBPG	-0.37866	6.6383	-7.2538	2.7923e-07	4.2587e-06	6.2171	6.8538	6.8122	6.6138	6.6465	6.4028	6.5005
MT1X	-0.83379	3.2231	-7.2532	2.796e-07	4.2609e-06	6.8303	3.5365	3.6004	3.4885	3.2422	2.7433	2.7278
PAM	0.63666	4.2618	7.252	2.803e-07	4.2681e-06	6.6592	3.8139	3.9161	4.3889	4.4615	4.4453	4.5453
NUDT5	0.45091	5.4651	7.2497	2.8173e-07	4.2863e-06	6.3931	5.1763	5.2622	5.4866	5.5263	5.6644	5.6745
PIKFYVE	-0.3405	7.1665	-7.2471	2.8333e-07	4.3072e-06	6.1475	7.3789	7.3376	7.1183	7.1298	7.0092	7.0256
NMNAT3	-0.40325	6.0063	-7.2451	2.846e-07	4.323e-06	6.2747	6.1932	6.2255	5.9663	6.0437	5.781	5.8277
NPY1R	1.2354	2.168	7.2436	2.8551e-07	4.3333e-06	6.9641	1.5439	1.3901	2.3298	2.3328	2.7203	2.691
APP	0.33485	7.6846	7.2395	2.8808e-07	4.3688e-06	6.0939	7.4743	7.4826	7.7442	7.7829	7.7796	7.8442
TM9SF2	0.3603	7.0101	7.2382	2.8892e-07	4.3779e-06	6.1539	6.7708	6.8472	7.039	7.0672	7.1454	7.1907
EPN2	-0.60414	4.1396	-7.2297	2.9432e-07	4.4555e-06	6.5711	4.4541	4.4676	4.1761	4.0173	3.8938	3.8285
RWDD2B	0.94834	3.0764	7.2294	2.9452e-07	4.4555e-06	6.8519	2.4157	2.6125	3.1514	3.3549	3.4654	3.4583
CLDN15	-0.64568	4.199	-7.2279	2.9548e-07	4.4664e-06	6.5502	4.5886	4.5222	4.2276	4.0099	4.017	3.8285
SLC11A2	-0.37635	6.6688	-7.2272	2.9596e-07	4.47e-06	6.1532	6.9167	6.8293	6.6336	6.6435	6.4573	6.5322
SAPCD2	0.52931	4.7914	7.2241	2.9793e-07	4.4962e-06	6.4594	4.567	4.5222	4.7026	4.8016	5.1125	5.0425
HEPACAM2	-1.9669	0.58203	-7.222	2.9929e-07	4.513e-06	6.7354	1.7621	1.3675	0.69693	0.52987	-0.6221	-0.24212
SLC35F2	1.5867	2.0203	7.2185	3.0164e-07	4.5448e-06	6.9084	1.3777	0.97874	1.794	2.4361	2.7716	2.7638
PITPNM1	1.1431	2.6321	7.2139	3.0469e-07	4.587e-06	6.8776	1.8599	2.0723	2.9743	2.6612	3.1404	3.0846
SLC38A10	0.49021	5.5293	7.2128	3.0537e-07	4.5936e-06	6.3081	5.1874	5.2622	5.7347	5.5584	5.7401	5.6928
SUCO	-0.35921	6.6808	-7.2096	3.0755e-07	4.6226e-06	6.1133	6.8773	6.8659	6.6736	6.6456	6.4875	6.5348
FBXW7	-0.35993	6.5753	-7.207	3.0931e-07	4.6454e-06	6.1177	6.7744	6.7778	6.5514	6.515	6.4198	6.4129
HBZ	-1.7636	0.65014	-7.2056	3.1026e-07	4.6558e-06	6.7759	1.5826	1.7625	0.58297	0.17911	-0.17072	-0.035672
FTL	-0.30482	12.112	-7.204	3.1137e-07	4.6687e-06	5.7241	12.226	12.399	11.993	12.041	12.01	12.005
HIST4H4	0.62726	4.0724	7.199	3.1478e-07	4.7139e-06	6.5663	3.7557	3.7473	4.116	4.0575	4.3807	4.3774
ASUN	0.44652	6.2542	7.1988	3.1488e-07	4.7139e-06	6.1585	6.0503	5.9567	6.232	6.3909	6.3978	6.4973
ZDHHC20	0.43052	5.9851	7.1966	3.1639e-07	4.7325e-06	6.1945	5.7274	5.7148	6.0545	6.1181	6.0882	6.2077
IDE	0.35502	6.8302	7.1963	3.1664e-07	4.7325e-06	6.0801	6.6195	6.633	6.8625	6.9034	6.9837	6.979
MGST2	0.63296	4.3754	7.1956	3.1709e-07	4.7355e-06	6.5115	3.9681	3.9769	4.4606	4.6439	4.5665	4.6365
MADD	0.51453	4.8947	7.195	3.1756e-07	4.7388e-06	6.3796	4.6354	4.6113	4.9621	4.877	5.1763	5.1061
ANXA4	0.5007	5.9588	7.193	3.1893e-07	4.7554e-06	6.1944	5.7542	5.5444	6.023	6.1386	6.0764	6.2164
SERINC1	-0.34584	7.1904	-7.1921	3.1958e-07	4.7612e-06	6.024	7.3792	7.3513	7.1586	7.2166	6.9931	7.0434
USP44	0.48509	5.2397	7.1908	3.2048e-07	4.7708e-06	6.3098	4.9301	4.9591	5.3393	5.3597	5.3682	5.4816
EMC3	-0.38548	6.1017	-7.1841	3.2521e-07	4.8375e-06	6.1227	6.3276	6.3129	6.0347	6.0685	5.9082	5.9581
STRADB	-0.35132	6.756	-7.1796	3.2841e-07	4.8812e-06	6.0386	6.9374	6.9404	6.7249	6.7581	6.5903	6.5851
STX1A	-1.3431	1.7741	-7.1756	3.3134e-07	4.9208e-06	6.818	2.7663	2.3036	1.706	1.4388	1.3406	1.0893
VPS13D	-0.43115	6.7188	-7.1729	3.3328e-07	4.945e-06	6.0217	7.0728	6.9085	6.6863	6.5222	6.5923	6.5307
DPP3	0.41637	6.1257	7.1726	3.335e-07	4.945e-06	6.1147	5.8316	5.9773	6.1266	6.1781	6.3199	6.3207
NIFK	0.46888	5.7103	7.17	3.3543e-07	4.9684e-06	6.1737	5.3797	5.5444	5.7009	5.7824	5.8799	5.9744
SLC35E1	0.45985	5.3209	7.1697	3.3561e-07	4.9684e-06	6.2452	5.0264	5.0645	5.4217	5.3978	5.5376	5.4774
EHMT2	0.38216	6.3333	7.1666	3.3797e-07	4.9993e-06	6.0734	6.1037	6.13	6.4054	6.3602	6.5225	6.4778
C6orf89	-0.33527	8.1405	-7.1531	3.4808e-07	5.1448e-06	5.8527	8.2745	8.3949	8.0577	8.1175	7.996	8.0022
LRRC61	0.54593	4.93	7.1506	3.5003e-07	5.1695e-06	6.2829	4.5054	4.7041	5.0858	4.9813	5.1752	5.1285
AP1S2	0.88145	3.2112	7.144	3.5514e-07	5.2409e-06	6.6395	2.8481	2.5437	3.3618	3.3578	3.5689	3.5866
SRSF1	0.29728	8.5259	7.1425	3.5629e-07	5.2537e-06	5.805	8.3618	8.3587	8.5703	8.5485	8.6666	8.6491
GDAP1	1.6618	1.5631	7.1362	3.6125e-07	5.3226e-06	6.6692	0.27497	0.75387	2.0005	1.9846	2.2349	2.1297
PMPCA	0.37987	6.4687	7.1355	3.6185e-07	5.3273e-06	5.9867	6.2096	6.2943	6.5195	6.5281	6.6057	6.6548
FERMT1	1.0966	2.4002	7.1341	3.6297e-07	5.3395e-06	6.7164	1.8756	1.8135	2.3415	2.4851	2.9505	2.9348
FADS1	-0.35447	6.7265	-7.1326	3.6412e-07	5.3521e-06	5.9349	6.9374	6.909	6.6602	6.7157	6.5606	6.5761
AGAP3	0.45677	5.3465	7.1306	3.6571e-07	5.3714e-06	6.1515	5.0679	5.0922	5.4286	5.4106	5.5782	5.5013
MFNG	0.4066	6.2815	7.1301	3.6613e-07	5.3733e-06	6.0002	6.0082	6.084	6.3087	6.378	6.5028	6.4076
PPP1R3B	-0.43141	5.6506	-7.1258	3.6966e-07	5.4208e-06	6.0593	5.8897	5.849	5.6952	5.6011	5.3903	5.4786
HMGN1	0.31705	7.9102	7.1233	3.7166e-07	5.4459e-06	5.8133	7.7375	7.6936	7.9664	7.9991	8.0262	8.0385
DOCK8	0.46773	5.2246	7.1167	3.7712e-07	5.5169e-06	6.1455	4.9301	4.9496	5.3364	5.3107	5.4457	5.3752
ACVR1B	0.7069	3.8099	7.1167	3.7714e-07	5.5169e-06	6.4535	3.3301	3.4689	3.9497	3.8877	4.1566	4.0663
ZFPM1	-0.47061	5.7075	-7.1164	3.7739e-07	5.5169e-06	6.0249	6.0091	5.9262	5.7213	5.5805	5.5862	5.4216
TBKBP1	1.4299	1.7049	7.1149	3.7857e-07	5.5297e-06	6.6746	0.85203	0.97874	1.8278	1.8907	2.3139	2.3664
THEMIS2	-0.36715	6.4834	-7.1136	3.7972e-07	5.5422e-06	5.9187	6.6494	6.7223	6.4488	6.4411	6.3366	6.3025
E2F5	0.87267	3.1198	7.1131	3.801e-07	5.5435e-06	6.5751	2.6796	2.678	3.0406	3.2263	3.5164	3.5776
HNRNPR	0.33055	7.941	7.1103	3.8242e-07	5.5729e-06	5.7794	7.7622	7.7686	7.9082	8.0155	8.0907	8.1008
GLA	0.45549	5.3054	7.1091	3.8349e-07	5.5841e-06	6.1129	5.0334	5.0218	5.3825	5.4246	5.5076	5.4623
MBD2	0.47798	5.6454	7.1085	3.84e-07	5.5872e-06	6.0516	5.3194	5.4074	5.678	5.7949	5.7671	5.9054
ACTR2	0.43088	8.1125	7.1079	3.8446e-07	5.5895e-06	5.764	7.9208	7.7721	8.1404	8.2938	8.1841	8.3637
CNDP2	0.41168	6.323	7.1071	3.8512e-07	5.5947e-06	5.9434	6.0828	6.0875	6.4124	6.37	6.4207	6.5648
SLC2A4RG	-0.56667	4.4646	-7.1065	3.8568e-07	5.5986e-06	6.2371	4.761	4.686	4.474	4.5305	4.254	4.0822
XPO7	-0.33013	7.6444	-7.1018	3.8969e-07	5.6523e-06	5.7784	7.8606	7.8099	7.5642	7.6233	7.4793	7.5289
KLF6	0.47262	5.9073	7.1011	3.9028e-07	5.6565e-06	5.9924	5.6891	5.573	5.9318	6.0514	6.0226	6.1758
GIPC1	0.53726	4.7139	7.0998	3.9138e-07	5.668e-06	6.2202	4.3708	4.3518	4.892	4.8811	4.8473	4.9405
HBP1	-0.43555	5.7491	-7.0991	3.9198e-07	5.6723e-06	5.9833	5.9409	6.0096	5.6547	5.8105	5.5384	5.5404
STMN1	0.35565	8.1922	7.0959	3.9478e-07	5.7083e-06	5.7284	7.9794	7.9807	8.2192	8.308	8.2617	8.4039
UBA5	0.41681	5.6786	7.0947	3.9585e-07	5.7194e-06	6.0105	5.4547	5.4266	5.7556	5.719	5.8629	5.853
ANKLE1	-0.35403	6.9566	-7.094	3.9642e-07	5.7232e-06	5.8218	7.1384	7.2214	6.8892	6.8371	6.8465	6.8069
SLFN11	1.2331	2.3453	7.0932	3.9712e-07	5.729e-06	6.6442	1.5439	1.4769	2.6646	2.8927	2.766	2.7278
NOP16	0.4082	5.796	7.0917	3.9847e-07	5.744e-06	5.9802	5.6139	5.5656	5.7914	5.8067	6.0179	5.9808
LYPLA1	0.52682	6.9568	7.0888	4.0105e-07	5.7766e-06	5.8328	6.7581	6.4851	7.0408	7.1695	7.0333	7.2542
C5orf42	1.8656	1.3	7.0784	4.1027e-07	5.9049e-06	6.4715	0.49398	-0.1949	1.7595	1.7009	2.0253	2.015
KDM1A	0.32891	7.5976	7.0711	4.17e-07	5.9972e-06	5.7215	7.3816	7.4464	7.6152	7.6576	7.7305	7.7541
ACSF2	-0.63106	3.7416	-7.0652	4.2241e-07	6.0703e-06	6.2759	4.1435	4.1586	3.5095	3.6094	3.4757	3.5527
MFGE8	1.0599	2.5369	7.0623	4.2512e-07	6.1046e-06	6.5545	2.0377	1.8464	2.7015	2.6373	2.9751	3.0232
TP53RK	0.43958	5.6373	7.0565	4.3062e-07	6.1787e-06	5.9332	5.4271	5.3396	5.6617	5.7527	5.797	5.846
LRRC58	0.40398	6.4587	7.0442	4.4249e-07	6.3442e-06	5.785	6.2612	6.1663	6.4915	6.6015	6.5756	6.6562
APAF1	0.61946	4.3884	7.0423	4.4437e-07	6.3663e-06	6.164	4.1272	3.8767	4.5568	4.5318	4.5842	4.6536
EGLN3	-1.5373	1.0917	-7.0413	4.453e-07	6.3747e-06	6.4981	1.7954	1.8626	1.288	1.0183	0.30235	0.28351
RBX1	-0.41716	6.1204	-7.0391	4.4751e-07	6.399e-06	5.7969	6.3835	6.2846	6.0871	6.142	5.8443	5.9808
IPO13	-0.38229	5.9028	-7.0389	4.4768e-07	6.399e-06	5.8176	6.1455	6.1753	5.7763	5.7627	5.7845	5.7724
ZNF768	0.46599	5.5711	7.0383	4.4832e-07	6.4031e-06	5.9011	5.3492	5.291	5.5885	5.614	5.8727	5.7113
PFDN5	-0.33168	7.4179	-7.0355	4.511e-07	6.4379e-06	5.6521	7.5535	7.5881	7.4298	7.461	7.2044	7.2706
E2F3	0.37558	6.3178	7.0351	4.5146e-07	6.4381e-06	5.7772	6.1293	6.119	6.2982	6.3624	6.4828	6.515
E2F7	-0.8201	3.0368	-7.0317	4.5488e-07	6.4819e-06	6.3489	3.4761	3.576	2.7374	3.0053	2.7604	2.6658
RCC2	0.30418	8.1979	7.0313	4.5527e-07	6.4825e-06	5.5795	8.0459	8.0291	8.1982	8.2291	8.3613	8.3236
ZNF562	0.38651	6.1106	7.0298	4.5686e-07	6.4988e-06	5.7958	5.88	5.9136	6.1392	6.1673	6.2573	6.3062
CHMP1B	-0.45117	5.9404	-7.0295	4.571e-07	6.4988e-06	5.7962	6.1696	6.2145	6.0009	5.7803	5.7075	5.7695
RPS6KL1	-0.43292	6.0635	-7.0245	4.622e-07	6.5661e-06	5.7602	6.3544	6.3764	5.9767	5.8003	5.9995	5.8737
CTSF	-0.66169	3.6318	-7.0184	4.6854e-07	6.6513e-06	6.2112	3.9273	4.0353	3.6147	3.5846	3.2848	3.3442
SET	0.30606	8.8436	7.017	4.6998e-07	6.6666e-06	5.4977	8.63	8.7151	8.8434	8.9155	8.9852	8.9723
ITPR3	-1.9342	0.68631	-7.014	4.731e-07	6.7057e-06	6.3481	1.4838	1.7967	0.99306	0.52987	-0.6221	-0.063417
SASH1	1.4376	1.7691	7.0111	4.7613e-07	6.74e-06	6.4554	0.88339	0.88663	2.194	2.0146	2.2907	2.3455
MXD1	0.3847	6.1412	7.011	4.7624e-07	6.74e-06	5.7541	5.8742	5.9117	6.2492	6.2601	6.2528	6.2994
NT5DC2	0.39149	5.9836	7.007	4.8053e-07	6.7955e-06	5.763	5.796	5.7358	6.0175	6.0378	6.1526	6.162
PSME3	0.37627	6.5598	7.0061	4.8144e-07	6.8033e-06	5.682	6.3024	6.414	6.5615	6.6108	6.7521	6.7181
RPL30	-0.2867	10.26	-7.0003	4.8769e-07	6.8864e-06	5.3617	10.38	10.441	10.19	10.299	10.117	10.13
GRSF1	0.34366	6.8568	6.9968	4.9144e-07	6.934e-06	5.6266	6.6833	6.6564	6.8706	6.9042	7.0071	7.0194
MALT1	0.54971	4.7677	6.9949	4.935e-07	6.9579e-06	5.9643	4.4567	4.4516	4.7496	4.934	5.0411	4.9733
PPT2	-0.5015	4.6111	-6.9939	4.9467e-07	6.9691e-06	5.9376	4.9745	4.8757	4.4713	4.4911	4.4523	4.4017
GNB1	0.34733	7.2032	6.9929	4.9575e-07	6.979e-06	5.5835	7.0009	6.9915	7.2278	7.3147	7.3126	7.3717
EFHD2	0.56697	4.5176	6.989	5e-07	7.0336e-06	5.9961	4.3428	4.132	4.5365	4.4844	4.8	4.8099
ETV6	0.88089	3.227	6.988	5.0118e-07	7.0449e-06	6.2938	2.625	2.7925	3.5043	3.2611	3.5945	3.5844
RANBP6	-0.38499	5.8717	-6.9848	5.0476e-07	7.0898e-06	5.7077	6.0853	6.064	5.8643	5.8385	5.6802	5.6979
AKIRIN1	0.41541	5.7536	6.9813	5.0862e-07	7.1386e-06	5.7395	5.5359	5.5355	5.7347	5.8169	5.9202	5.9782
SNN	1.2577	2.1824	6.9784	5.1189e-07	7.1792e-06	6.3998	1.2868	1.6172	2.2697	2.4904	2.7604	2.67
HIVEP1	-0.44561	5.2574	-6.9776	5.1287e-07	7.1875e-06	5.7888	5.5396	5.4416	5.2658	5.2025	5.0687	5.0261
U2AF2	0.3225	7.7476	6.9739	5.1709e-07	7.2411e-06	5.4873	7.5548	7.6003	7.737	7.7956	7.8754	7.9225
AKT2	-0.33754	8.1527	-6.9718	5.1943e-07	7.2686e-06	5.4408	8.3935	8.3366	8.1188	8.0082	8.0767	7.9824
CNOT11	0.459	5.7055	6.9714	5.199e-07	7.2696e-06	5.7287	5.4257	5.4788	5.6605	5.8411	5.9465	5.8801
PKD1L3	-2.2385	0.48594	-6.9666	5.2553e-07	7.3429e-06	6.1807	1.5439	1.6172	1.0796	-0.019218	-0.6221	-0.68383
TUBE1	-0.38404	6.1419	-6.9554	5.3873e-07	7.5217e-06	5.6061	6.3732	6.2861	6.1839	6.1181	5.9353	5.9551
SNHG7	-0.47143	6.7372	-6.9534	5.4112e-07	7.5494e-06	5.5267	7.1638	6.8503	6.6342	6.7017	6.5443	6.529
CTD-2336O2.1	-0.87915	3.1222	-6.9529	5.4178e-07	7.553e-06	6.1795	3.3471	3.7209	3.2666	3.1062	2.6055	2.6868
GLUD1	0.36536	6.8767	6.9505	5.4472e-07	7.5883e-06	5.5206	6.6585	6.6818	6.8635	6.9871	7.0169	7.0523
CBX7	-0.74315	3.4866	-6.9438	5.5279e-07	7.6949e-06	6.0757	3.9754	3.7861	3.4457	3.473	2.9992	3.2402
JMY	-0.42268	5.6504	-6.9432	5.5356e-07	7.6999e-06	5.6441	5.9221	5.848	5.5461	5.6556	5.4992	5.4315
SLC7A1	-0.33073	7.3731	-6.9369	5.6134e-07	7.8023e-06	5.4272	7.6228	7.547	7.2637	7.294	7.2817	7.2294
ARNTL2	0.74236	4.0644	6.934	5.65e-07	7.8473e-06	6.0108	3.5658	3.5612	4.3105	4.3717	4.148	4.4294
RP11-640M9.2	1.0738	2.486	6.9312	5.685e-07	7.8901e-06	6.2784	1.8756	1.7967	2.7812	2.6373	2.9256	2.8993
SEC62	-0.35931	6.958	-6.9259	5.7526e-07	7.978e-06	5.4435	7.2028	7.1201	6.8686	6.9558	6.7651	6.8359
RABEP2	0.94113	2.8559	6.925	5.7644e-07	7.9846e-06	6.2097	2.233	2.461	2.8648	2.994	3.3197	3.2627
STK17A	-0.43216	5.5689	-6.9249	5.7659e-07	7.9846e-06	5.6157	5.7594	5.8581	5.476	5.5743	5.3316	5.414
FN3K	-0.59002	4.4378	-6.9242	5.7753e-07	7.9916e-06	5.8253	4.8088	4.6792	4.5004	4.308	4.25	4.0806
LIMD2	0.63116	3.981	6.9198	5.8315e-07	8.0634e-06	5.9732	3.604	3.6196	4.1228	4.0503	4.26	4.2295
VPS4B	0.42196	5.7267	6.9145	5.9008e-07	8.1532e-06	5.5992	5.4742	5.459	5.7935	5.8624	5.8403	5.9307
SPIN3	0.93221	3.112	6.9123	5.9295e-07	8.1868e-06	6.1473	2.7579	2.3845	3.158	3.352	3.5396	3.4801
KLHL35	0.40821	5.724	6.9095	5.9668e-07	8.2321e-06	5.586	5.5235	5.4389	5.8052	5.7965	5.8934	5.8865
MRPL52	0.39451	6.0107	6.9061	6.0117e-07	8.288e-06	5.5317	5.7773	5.7909	6.0311	6.1042	6.2121	6.1489
APH1B	1.0474	2.5574	6.9038	6.0439e-07	8.3262e-06	6.2063	1.9809	1.9713	2.6268	2.7441	2.9306	3.0909
EIF4G3	0.40156	5.922	6.9025	6.0613e-07	8.344e-06	5.5344	5.71	5.7058	5.987	5.906	6.1461	6.0772
UBE2V1	-0.82818	2.9976	-6.8966	6.1416e-07	8.4483e-06	6.0765	3.4022	3.3873	3.1177	2.9789	2.4462	2.6531
CLNS1A	0.35477	7.169	6.8935	6.1836e-07	8.4998e-06	5.361	6.8938	7.0274	7.2119	7.2526	7.2954	7.333
CDC14B	0.95004	2.7697	6.8923	6.2008e-07	8.5171e-06	6.1573	2.2571	2.1404	2.9743	2.9443	3.1619	3.1403
CTD-2506P8.6	-1.1703	1.8181	-6.8911	6.2166e-07	8.5326e-06	6.2111	2.361	2.3618	1.8444	1.9617	1.181	1.1984
TEP1	0.56173	4.5475	6.8883	6.2564e-07	8.5752e-06	5.7734	4.2676	4.1684	4.7229	4.5689	4.7625	4.7946
IRF2BPL	0.44374	5.7219	6.8882	6.2568e-07	8.5752e-06	5.5323	5.5148	5.4893	5.7424	5.6827	6.0314	5.871
MYLIP	-0.36958	6.1921	-6.8864	6.2821e-07	8.5994e-06	5.4385	6.4254	6.3876	6.1543	6.1077	6.069	6.0089
FNIP2	0.41372	6.4468	6.8863	6.2837e-07	8.5994e-06	5.4238	6.3425	6.1308	6.4522	6.4569	6.6179	6.6807
PLEKHG4	0.37638	6.3485	6.882	6.344e-07	8.6756e-06	5.4284	6.1211	6.1483	6.4248	6.37	6.5554	6.4712
MFSD1	0.42934	5.5444	6.8766	6.4218e-07	8.7755e-06	5.5434	5.2875	5.2774	5.6044	5.6674	5.7551	5.6745
PRDM11	-0.62689	3.7681	-6.8693	6.5267e-07	8.9096e-06	5.8432	4.1305	4.0948	3.6339	3.7652	3.533	3.451
HOMER1	0.60561	4.0765	6.8691	6.5295e-07	8.9096e-06	5.8392	3.6996	3.7209	4.1989	4.2126	4.2955	4.3316
CPNE3	0.38378	7.8801	6.8674	6.5553e-07	8.9324e-06	5.2377	7.655	7.6192	7.9329	8.0399	7.923	8.1109
SLC39A11	0.55386	4.9209	6.867	6.5599e-07	8.9324e-06	5.652	4.441	4.6928	5.1472	5.0067	5.1125	5.1254
FAM50A	-0.41857	6.0662	-6.8669	6.5624e-07	8.9324e-06	5.4095	6.3169	6.2981	6.0949	5.905	5.9259	5.8567
TEAD1	0.39157	6.2927	6.8667	6.5653e-07	8.9324e-06	5.3986	6.1455	6.0393	6.2461	6.3569	6.4798	6.4883
FOXO4	-0.50862	4.6457	-6.8601	6.6622e-07	9.0576e-06	5.632	4.8589	5.0308	4.5668	4.5421	4.4575	4.4181
GOLM1	0.42241	5.8774	6.8519	6.7855e-07	9.2186e-06	5.4296	5.5999	5.6752	5.8724	6.0017	6.0244	6.0907
BRD2	-0.32361	8.7265	-6.831	7.11e-07	9.6523e-06	5.0765	8.9081	8.928	8.7468	8.5864	8.6115	8.5786
PPP1R15B	-0.3077	7.6026	-6.8293	7.1377e-07	9.6829e-06	5.1625	7.8028	7.7822	7.5459	7.5164	7.4694	7.499
RND1	-1.2712	1.8759	-6.8269	7.1766e-07	9.7286e-06	6.0713	2.4475	2.4067	2.2819	1.7903	1.2144	1.1143
GORASP2	0.43308	5.4747	6.8255	7.1991e-07	9.752e-06	5.4394	5.2184	5.2078	5.5256	5.6091	5.6091	5.6782
THOP1	0.33668	6.9561	6.8247	7.2121e-07	9.7625e-06	5.2226	6.8106	6.759	6.9816	6.9405	7.1411	7.1039
SNRPD1	0.3525	7.1702	6.8232	7.2352e-07	9.7866e-06	5.1999	6.977	6.9598	7.1574	7.2873	7.2959	7.3437
AGO4	0.59866	4.1514	6.8168	7.3409e-07	9.9224e-06	5.7142	3.7301	3.756	4.3776	4.3688	4.3091	4.3671
BCLAF1	0.30002	8.4007	6.8154	7.3625e-07	9.9444e-06	5.0732	8.2151	8.2354	8.4265	8.4794	8.4903	8.5575
PHACTR4	0.50508	4.6868	6.8148	7.3729e-07	9.9509e-06	5.5644	4.4645	4.3942	4.6912	4.6946	4.972	4.9043
DEDD2	-0.3727	5.9365	-6.8145	7.3779e-07	9.9509e-06	5.3102	6.1194	6.1622	5.9084	5.8915	5.7783	5.7591
NRARP	-0.94721	3.2545	-6.814	7.3864e-07	9.9551e-06	5.8224	3.8815	3.6985	3.4457	2.8011	2.8899	2.8104
GAB3	-0.38496	5.8047	-6.8109	7.4382e-07	1.0018e-05	5.3209	6.0047	6.0267	5.7978	5.7348	5.6508	5.6134
EEF1A1P5	-0.39592	6.6979	-6.8101	7.4505e-07	1.0027e-05	5.211	6.8187	6.926	6.6608	6.8263	6.5087	6.4471
MSMO1	-0.46991	4.7945	-6.8067	7.5082e-07	1.0097e-05	5.499	5.0051	4.9666	4.892	4.8678	4.5322	4.5033
CTNNB1	0.32566	7.2385	6.806	7.5193e-07	1.0105e-05	5.1534	7.054	7.0488	7.266	7.3106	7.3506	7.4012
KLF16	0.4602	5.4346	6.8049	7.5377e-07	1.0116e-05	5.3935	5.2713	5.1262	5.445	5.4364	5.7272	5.6013
ZNF282	0.50426	5.2557	6.8049	7.5384e-07	1.0116e-05	5.4271	4.9017	5.1042	5.1802	5.3287	5.5523	5.4671
TRPC4	2.2011	0.72957	6.803	7.5705e-07	1.0152e-05	5.6855	-0.61137	-0.41171	0.80254	1.2247	1.6761	1.6972
CTSL	-0.34539	6.5567	-6.8018	7.5909e-07	1.0172e-05	5.202	6.7368	6.7816	6.4703	6.5245	6.41	6.417
MS4A4E	2.6905	0.4422	6.7956	7.6971e-07	1.0307e-05	5.1955	-1.2634	-1.3732	1.312	1.2247	1.3998	1.3534
AC005593.2	-1.2038	1.7932	-6.7942	7.7208e-07	1.0331e-05	5.999	2.4475	2.3732	1.893	1.5859	1.3705	1.0893
AGMAT	0.96148	2.6786	6.7919	7.7611e-07	1.0378e-05	5.9454	2.1708	2.0723	2.8729	2.7925	3.0693	3.094
CD63	0.37768	7.4974	6.7916	7.7671e-07	1.0378e-05	5.0993	7.2144	7.2897	7.5607	7.6672	7.5477	7.7044
SLC9A2	0.94015	2.7508	6.786	7.8646e-07	1.0501e-05	5.9254	2.196	2.1667	2.9743	2.9325	3.0919	3.1434
VPS13A	-0.31341	7.8082	-6.7817	7.9408e-07	1.0595e-05	5.0381	8.0199	7.934	7.8058	7.7632	7.6486	7.6775
WBP2	-0.42928	5.3282	-6.7799	7.974e-07	1.0632e-05	5.3253	5.5543	5.5767	5.2173	5.3472	5.1453	5.1285
MRPL41	0.50831	4.583	6.7753	8.0561e-07	1.0734e-05	5.4946	4.3541	4.314	4.5668	4.5727	4.8698	4.8204
TNS3	-0.35874	6.1965	-6.7702	8.1488e-07	1.0849e-05	5.1707	6.3999	6.4446	6.13	6.0791	6.0535	6.0721
HTRA2	-0.38728	5.9641	-6.7687	8.1767e-07	1.0879e-05	5.2012	6.117	6.2364	5.9084	5.9421	5.81	5.7709
UGDH	1.1267	2.534	6.7671	8.2059e-07	1.091e-05	5.9212	1.9367	1.6735	2.7725	2.9827	2.832	3.0066
GUCA1B	-1.0556	2.4312	-6.7655	8.2356e-07	1.0942e-05	5.8589	3.2955	2.8667	2.2819	2.1422	1.8347	2.166
PRMT5-AS1	-1.4705	1.1265	-6.7652	8.2418e-07	1.0942e-05	5.9207	1.7789	1.7625	1.288	1.2874	0.44969	0.1926
SLC7A5	-0.34692	8.006	-6.7642	8.2602e-07	1.0959e-05	4.9781	8.2176	8.2375	7.9634	7.8502	7.9566	7.8108
CAPN15	0.37523	6.38	6.7631	8.2792e-07	1.0976e-05	5.1489	6.2111	6.1809	6.3779	6.3609	6.6345	6.5147
NAT14	0.71408	3.6003	6.7615	8.3088e-07	1.1007e-05	5.7	3.2177	3.183	3.7083	3.6457	3.9908	3.8565
PCNT	-0.44426	8.1835	-6.7604	8.3308e-07	1.1029e-05	4.9548	8.5194	8.3882	8.2397	7.932	8.0388	7.983
BEND3	0.51403	4.6468	6.7541	8.4488e-07	1.1177e-05	5.442	4.4063	4.2992	4.7003	4.7345	4.8983	4.8421
PRKAR2A	0.41925	6.008	6.7456	8.6123e-07	1.1385e-05	5.1645	5.7867	5.7792	5.9606	6.1228	6.1547	6.2443
WSB1	-0.35462	7.5087	-6.7448	8.6281e-07	1.1398e-05	4.9776	7.7362	7.6933	7.5389	7.3654	7.3396	7.379
STRAP	0.33661	6.8377	6.7383	8.7539e-07	1.1556e-05	5.0394	6.6557	6.6488	6.8533	6.8934	6.9603	7.0149
PTGER3	0.85672	3.0844	6.7375	8.77e-07	1.1569e-05	5.7548	2.6434	2.5736	3.2727	3.1027	3.398	3.5157
ABRACL	0.72754	3.6297	6.7371	8.7788e-07	1.1572e-05	5.6439	3.2177	3.1894	3.6482	3.8652	3.9117	3.9462
INTS6	-0.32346	7.2078	-6.7363	8.7948e-07	1.1579e-05	4.9872	7.4165	7.3448	7.1841	7.1887	7.0342	7.0783
RP11-315A17.1	-1.5466	0.90767	-6.7361	8.7989e-07	1.1579e-05	5.8376	1.7106	1.5785	0.90094	1.0476	0.13823	0.070261
PRELID1	0.40139	7.0592	6.7359	8.8021e-07	1.1579e-05	5.0102	6.7911	6.908	6.9727	7.1825	7.2481	7.253
MPHOSPH9	-0.332	6.7281	-6.7354	8.8119e-07	1.1583e-05	5.0307	6.9072	6.9522	6.6707	6.6432	6.5998	6.5956
ADAMTSL4	-1.2098	2.3645	-6.7324	8.8717e-07	1.1654e-05	5.8081	3.0202	2.9525	2.7015	1.9306	1.8769	1.7054
MRPS22	0.37373	6.4619	6.7314	8.892e-07	1.1672e-05	5.0696	6.2425	6.2573	6.4494	6.5776	6.5983	6.6463
RCC1	0.36029	6.7542	6.7308	8.9038e-07	1.1679e-05	5.0299	6.6212	6.527	6.7137	6.7975	6.901	6.9651
FAM117B	0.4993	4.7262	6.7263	8.9941e-07	1.179e-05	5.357	4.4927	4.4219	4.7341	4.7876	4.9962	4.9247
EPM2AIP1	-0.46637	5.8763	-6.7255	9.01e-07	1.1802e-05	5.1078	6.2257	6.1131	5.8684	5.634	5.7762	5.6405
CMAS	-0.36486	6.0909	-6.7249	9.0227e-07	1.1811e-05	5.0839	6.3212	6.2657	6.0239	6.0787	5.919	5.9372
RAB5A	0.40428	5.6615	6.7216	9.0907e-07	1.1891e-05	5.1678	5.4016	5.4361	5.7111	5.777	5.7997	5.8432
ANKZF1	-0.40055	5.8287	-6.7203	9.1172e-07	1.1917e-05	5.1096	6.0666	6.0285	5.8438	5.732	5.6972	5.6041
CLIC4	-0.31176	7.6361	-6.7183	9.1578e-07	1.1962e-05	4.9074	7.8168	7.787	7.5939	7.6416	7.4555	7.5219
CHCHD7	-0.41414	5.4368	-6.7179	9.1652e-07	1.1964e-05	5.1703	5.66	5.6166	5.4997	5.3971	5.2159	5.2313
TERC	-0.37359	8.5481	-6.7166	9.1926e-07	1.1991e-05	4.831	8.8321	8.6026	8.5544	8.6148	8.3001	8.3847
DENR	0.38318	6.3831	6.7152	9.2221e-07	1.2013e-05	5.0442	6.1153	6.193	6.404	6.516	6.499	6.5713
DPY19L1	0.52099	5.0273	6.7152	9.2228e-07	1.2013e-05	5.2744	4.7225	4.7397	5.0433	5.1704	5.1517	5.3359
MPZL1	0.65042	4.0092	6.7147	9.2319e-07	1.2017e-05	5.5103	3.561	3.648	4.0744	4.2541	4.2955	4.2223
LGALS1	0.80195	3.6708	6.7133	9.2614e-07	1.204e-05	5.6057	3.2661	2.96	3.879	4.1001	3.8599	3.96
HES1	0.53546	4.4204	6.7133	9.2627e-07	1.204e-05	5.3977	4.0773	4.1716	4.4579	4.4991	4.6481	4.6685
ZNF347	1.3253	1.8087	6.7111	9.3081e-07	1.2091e-05	5.827	1.0585	1.1203	1.7768	2.0512	2.474	2.3716
DCXR	-0.41332	5.3941	-6.71	9.3306e-07	1.2112e-05	5.1575	5.6022	5.607	5.3422	5.4253	5.2221	5.1656
RPN2	0.34159	7.5005	6.7093	9.345e-07	1.2122e-05	4.9067	7.2373	7.3716	7.5135	7.5901	7.6292	7.661
RP3-453C12.14	-1.6424	0.7997	-6.7075	9.3833e-07	1.2163e-05	5.7614	1.7451	1.4556	0.99306	0.68705	-0.046987	-0.035672
FCHO2	-0.47682	5.4295	-6.7072	9.3899e-07	1.2163e-05	5.1424	5.8042	5.5668	5.3995	5.3985	5.142	5.2658
RUSC2	1.8354	1.263	6.705	9.437e-07	1.2216e-05	5.7133	0.41033	-0.12931	1.7595	1.535	2.1339	1.8685
COA7	0.38438	5.9355	6.6989	9.5684e-07	1.2377e-05	5.0652	5.7176	5.7609	5.8995	5.9886	6.1194	6.1272
WDR5	0.37912	6.0142	6.6953	9.6457e-07	1.2469e-05	5.0445	5.8456	5.8035	5.9861	6.0382	6.2392	6.1725
INVS	0.57212	4.2076	6.6926	9.7043e-07	1.2536e-05	5.41	3.85	3.8485	4.3832	4.3261	4.3971	4.4405
URI1	0.35614	6.8436	6.6912	9.734e-07	1.2565e-05	4.9309	6.6119	6.6829	6.8197	6.9412	6.9928	7.013
HMOX2	0.53835	4.5041	6.6896	9.7695e-07	1.2602e-05	5.3239	4.2192	4.2101	4.4819	4.6149	4.7137	4.7849
DNAH1	-0.92106	2.8576	-6.6872	9.8236e-07	1.2663e-05	5.6188	3.5415	3.2022	2.9362	2.5581	2.4602	2.4473
FBXO7	-0.28657	8.7174	-6.684	9.8935e-07	1.2745e-05	4.742	8.8349	8.8862	8.6806	8.7553	8.5641	8.5829
TMEM184A	-2.3237	-0.0059248	-6.6837	9.901e-07	1.2746e-05	5.3974	1.1644	1.1203	0.41551	-0.28529	-1.4819	-0.96856
NEDD4	0.53588	4.4466	6.6828	9.9212e-07	1.2763e-05	5.325	4.1008	4.1781	4.5391	4.5201	4.6312	4.71
TXNRD2	-0.45303	4.9389	-6.6812	9.9583e-07	1.2802e-05	5.1708	5.1588	5.2157	4.9468	4.8409	4.7497	4.7212
TMEM63C	-1.3746	1.4811	-6.6784	1.002e-06	1.2872e-05	5.7568	2.4049	1.9862	1.6315	1.2247	0.79661	0.84254
GATAD2A	0.31407	7.5502	6.6759	1.0077e-06	1.2932e-05	4.8224	7.3563	7.4339	7.5213	7.5718	7.7073	7.7107
MAN1C1	0.87571	2.9581	6.6757	1.0081e-06	1.2932e-05	5.6395	2.4475	2.4821	3.1712	2.9674	3.3387	3.3415
MBTPS1	0.39183	6.1496	6.6743	1.0114e-06	1.2967e-05	4.9836	5.9287	5.8881	6.2906	6.1958	6.2457	6.3489
DCUN1D5	0.36481	6.214	6.6713	1.0182e-06	1.3044e-05	4.962	6.0215	6.0213	6.1936	6.2765	6.3726	6.3984
RPL31	-0.28128	9.5382	-6.671	1.0189e-06	1.3044e-05	4.6535	9.7173	9.6418	9.5519	9.5185	9.4426	9.357
MBOAT2	-0.29489	7.9558	-6.6706	1.0198e-06	1.3047e-05	4.7708	8.0996	8.1189	7.9457	7.9444	7.7846	7.8417
HNRNPA2B1	0.30682	9.5156	6.6699	1.0214e-06	1.3059e-05	4.6558	9.4218	9.2885	9.4965	9.5653	9.6199	9.7018
ANO8	-0.86191	3.3183	-6.6688	1.0241e-06	1.3084e-05	5.478	3.8698	3.756	3.4016	2.9286	3.1361	2.818
TULP4	0.41525	5.4012	6.6665	1.0293e-06	1.3139e-05	5.0907	5.1215	5.1445	5.5049	5.5399	5.5499	5.5467
CTD-2369P2.8	-1.0547	1.9202	-6.666	1.0305e-06	1.3139e-05	5.7014	2.5488	2.5736	1.5731	1.8075	1.5247	1.4933
JUNB	-0.49486	7.5589	-6.666	1.0305e-06	1.3139e-05	4.7906	7.9037	7.7785	7.6522	7.3181	7.4375	7.2635
QSOX2	-0.38741	6.3365	-6.66	1.0445e-06	1.3308e-05	4.9003	6.596	6.5466	6.3139	6.1867	6.2508	6.1249
CCM2	0.61937	4.2043	6.6579	1.0495e-06	1.3363e-05	5.3264	3.7127	3.9991	4.2589	4.2989	4.5156	4.4405
CIT	-0.42472	6.4172	-6.6572	1.0513e-06	1.3376e-05	4.8803	6.7828	6.6187	6.3455	6.1949	6.3521	6.2092
FAM118A	-0.38365	5.8702	-6.6567	1.0524e-06	1.3382e-05	4.9567	6.0802	6.0926	5.8663	5.771	5.7415	5.6693
SLC6A8	-0.34835	6.7405	-6.655	1.0564e-06	1.3424e-05	4.8419	6.9933	6.947	6.6437	6.6089	6.6826	6.5674
CLINT1	0.3219	7.1908	6.6534	1.0603e-06	1.346e-05	4.8068	7.0027	7.0193	7.1999	7.2595	7.3083	7.3553
ABCD3	0.42722	5.4041	6.6532	1.0607e-06	1.346e-05	5.0556	5.1572	5.1528	5.4286	5.5256	5.5523	5.6079
SLC12A9	0.69054	4.1007	6.6491	1.0707e-06	1.3576e-05	5.3307	3.6319	3.8238	4.2021	4.0825	4.5552	4.3088
HIF1A	0.39879	5.6572	6.6481	1.073e-06	1.3597e-05	5.0005	5.4137	5.4102	5.7347	5.7677	5.7755	5.8414
ABHD17B	0.59159	4.1476	6.6447	1.0813e-06	1.3693e-05	5.3086	3.7851	3.8321	4.1597	4.305	4.4187	4.3852
GPR85	2.1874	0.76146	6.6442	1.0825e-06	1.3699e-05	5.3075	-0.44631	-0.86628	1.3818	1.4388	1.5114	1.5493
PDLIM5	0.36352	6.5157	6.6439	1.0832e-06	1.3699e-05	4.8603	6.3053	6.3283	6.4889	6.6132	6.6605	6.6981
MAFF	-0.80112	3.3438	-6.6436	1.084e-06	1.37e-05	5.4364	3.9273	3.526	3.4511	3.3163	2.8795	2.9626
2019-09-11	0.35191	6.9887	6.6431	1.0854e-06	1.3707e-05	4.8044	6.8014	6.7794	6.9732	7.0971	7.104	7.1772
CXCL8	1.4571	2.0905	6.642	1.0879e-06	1.3729e-05	5.6736	0.78718	1.0082	2.9362	3.1473	2.202	2.462
KIAA1324L	0.71152	3.5561	6.641	1.0905e-06	1.3753e-05	5.4467	3.1157	3.1033	3.6716	3.8065	3.8089	3.8303
EFR3A	0.32264	6.9171	6.636	1.1027e-06	1.3898e-05	4.7939	6.7507	6.7443	6.9272	6.9415	7.0525	7.0862
RAB35	0.46616	5.0884	6.6355	1.104e-06	1.3905e-05	5.0735	4.7483	4.9228	5.1338	5.1204	5.3221	5.2832
MTMR4	0.40589	5.7382	6.6339	1.108e-06	1.3937e-05	4.947	5.4984	5.5717	5.719	5.7655	5.8857	5.9888
ZNF470	1.4629	1.4412	6.6339	1.108e-06	1.3937e-05	5.6386	0.49398	0.78822	1.5731	1.5859	2.1075	2.0987
KCNN4	-0.33271	7.1545	-6.6317	1.1136e-06	1.3997e-05	4.7508	7.385	7.2915	7.1382	7.0973	7.0435	6.9715
NDOR1	-0.46109	5.8437	-6.63	1.1178e-06	1.4041e-05	4.8904	6.1775	6.1258	5.8314	5.5418	5.7236	5.6624
PLCL2	0.541	4.4551	6.627	1.1255e-06	1.4128e-05	5.1936	4.0602	4.2477	4.503	4.5318	4.6932	4.6946
TRAPPC2L	0.55898	4.4642	6.626	1.1281e-06	1.4151e-05	5.1933	4.1755	4.1085	4.5211	4.5939	4.6157	4.7702
WDR74	-0.60657	9.5399	-6.6256	1.1292e-06	1.4155e-05	4.5449	10.161	9.6112	9.4045	9.5019	9.289	9.272
PRKD3	1.9309	0.96079	6.6241	1.1329e-06	1.4192e-05	5.5027	-0.2295	0.16019	0.9323	1.1725	1.688	2.0412
USP40	0.74712	3.3202	6.6237	1.134e-06	1.4197e-05	5.4526	2.856	2.8985	3.4619	3.4485	3.6565	3.5999
ZNF823	1.4242	1.6445	6.6204	1.1425e-06	1.4293e-05	5.6239	0.75363	0.91799	1.811	1.9068	2.1163	2.3612
HIST1H2AL	-0.29602	8.1054	-6.6197	1.1443e-06	1.4306e-05	4.6394	8.3063	8.2472	8.0937	8.0239	7.98	7.9816
FAHD1	-0.43128	5.1692	-6.6177	1.1496e-06	1.4362e-05	4.9809	5.4284	5.3935	5.1786	5.0525	4.995	4.9673
YWHAZ	0.29626	9.438	6.615	1.1564e-06	1.4438e-05	4.5345	9.2959	9.2597	9.4089	9.5181	9.5256	9.6195
LGALS9	0.38542	5.7648	6.6106	1.1682e-06	1.4575e-05	4.891	5.5445	5.5618	5.7676	5.838	5.9341	5.9425
SNHG5	-0.28921	8.1839	-6.6103	1.169e-06	1.4576e-05	4.6134	8.3604	8.2909	8.1879	8.1922	8.0257	8.0466
CTTN	0.33067	6.8272	6.6053	1.1822e-06	1.473e-05	4.7341	6.6177	6.6697	6.8842	6.8415	6.9904	6.9597
KIF1C	0.3654	6.0076	6.6043	1.1851e-06	1.4756e-05	4.8359	5.8296	5.8129	6.0028	6.0245	6.2095	6.1665
ALDH5A1	0.35968	6.5307	6.6021	1.191e-06	1.482e-05	4.7649	6.3024	6.3136	6.554	6.6776	6.6781	6.6583
UBR4	-0.39284	9.07	-6.601	1.1939e-06	1.4847e-05	4.5204	9.4218	9.2019	9.0723	8.8824	8.9591	8.8823
ATP5G3	0.33239	7.1776	6.5998	1.1971e-06	1.4877e-05	4.6855	7.004	6.9574	7.1906	7.2893	7.2886	7.3356
TPD52	0.80918	3.1492	6.5939	1.2132e-06	1.5066e-05	5.4185	2.6526	2.732	3.2727	3.258	3.416	3.5641
CEBPB	-0.58685	5.3575	-6.5926	1.2169e-06	1.5102e-05	4.8897	5.7773	5.5419	5.4396	5.2114	5.2333	4.9414
COL4A3BP	0.39852	5.8759	6.5907	1.2219e-06	1.5155e-05	4.8265	5.7349	5.6034	5.8754	5.91	6.0279	6.1036
DCBLD2	0.53431	4.5334	6.5904	1.2228e-06	1.5156e-05	5.0952	4.2586	4.1846	4.6912	4.5613	4.7137	4.7907
PHTF1	0.64778	4.1416	6.5867	1.2332e-06	1.5275e-05	5.1776	3.6819	3.8886	4.1363	4.2572	4.5355	4.3501
ADAMTS14	0.55792	5.4931	6.5828	1.2442e-06	1.54e-05	4.8861	5.2713	5.0468	5.7545	5.4454	5.7529	5.6876
MCM3	0.28249	8.6844	6.5802	1.2517e-06	1.5476e-05	4.5084	8.48	8.5703	8.7177	8.7236	8.8014	8.8132
AGPAT5	0.29816	8.5883	6.58	1.2521e-06	1.5476e-05	4.517	8.4333	8.3719	8.615	8.7099	8.6743	8.7253
NT5C3B	1.6139	1.428	6.5796	1.2532e-06	1.5476e-05	5.506	0.57305	0.35611	1.5327	1.954	2.0532	2.0987
ANGPTL4	-1.3309	1.3448	-6.5793	1.254e-06	1.5476e-05	5.5412	2.0516	1.9563	1.5327	1.1857	0.65801	0.68471
CCDC50	0.38773	5.7629	6.5792	1.2545e-06	1.5476e-05	4.821	5.5371	5.5381	5.7999	5.8557	5.8928	5.9538
BICD2	0.46177	5.1208	6.5727	1.2731e-06	1.5695e-05	4.9272	4.9207	4.7679	5.1704	5.2489	5.3259	5.2907
HES2	-0.73951	3.4646	-6.5715	1.2764e-06	1.5726e-05	5.2363	3.9497	3.743	3.4457	3.3839	3.2887	2.9763
RPL14	-0.26385	9.8285	-6.5708	1.2786e-06	1.5743e-05	4.4031	9.9431	9.9693	9.7969	9.8785	9.6698	9.7135
IFT122	-0.37473	5.7155	-6.5696	1.2819e-06	1.5772e-05	4.7811	5.9306	5.898	5.7021	5.6792	5.5653	5.5177
SZT2	-0.53774	6.4448	-6.5691	1.2836e-06	1.5783e-05	4.6709	6.8548	6.7514	6.4809	6.0478	6.2924	6.2418
FARP1	1.4918	1.5957	6.5679	1.2869e-06	1.5813e-05	5.5074	0.53406	0.97874	1.893	1.7193	2.0986	2.3507
SLC44A2	-0.37486	6.2614	-6.5668	1.2901e-06	1.5833e-05	4.6949	6.5207	6.4566	6.1052	6.2586	6.1078	6.1195
PDIA2	-0.61085	4.2312	-6.5668	1.2902e-06	1.5833e-05	5.0528	4.6169	4.5094	4.3459	4.008	3.9592	3.9479
UBC	-0.26881	9.2924	-6.5664	1.2914e-06	1.5837e-05	4.4264	9.4371	9.4674	9.2544	9.2258	9.2225	9.147
AIFM2	0.4274	5.7266	6.5612	1.3067e-06	1.6014e-05	4.7837	5.4442	5.5581	5.8262	5.6798	5.887	5.9641
SPON2	-0.85217	2.6903	-6.5582	1.3157e-06	1.6091e-05	5.3661	3.0272	3.2461	2.6832	2.6373	2.2185	2.3296
COMMD7	0.9367	2.7508	6.558	1.3163e-06	1.6091e-05	5.4203	2.2451	2.0723	3.0115	3.0015	3.0276	3.1464
MCF2	1.6759	1.2831	6.5577	1.317e-06	1.6091e-05	5.4411	0.17713	0.48736	1.6878	1.3709	1.8769	2.0987
CCNG1	-0.32899	7.441	-6.5577	1.3171e-06	1.6091e-05	4.5568	7.5887	7.5753	7.4725	7.5095	7.1838	7.3161
PTGS1	-1.3589	1.4875	-6.5577	1.3172e-06	1.6091e-05	5.494	2.0096	2.3504	1.5928	1.2627	1.0761	0.63379
ARL4A	-0.31419	6.9657	-6.5545	1.3266e-06	1.6195e-05	4.5925	7.1085	7.1393	6.9732	6.9546	6.8026	6.816
PJA1	0.94715	2.7557	6.553	1.3314e-06	1.6242e-05	5.4027	2.1321	2.2676	3.0406	2.8139	3.1008	3.1793
NRSN2	1.8507	0.93204	6.5516	1.3355e-06	1.6282e-05	5.3259	-0.29821	0.051257	1.1346	1.2751	1.6519	1.7776
HAUS3	-0.37337	5.8406	-6.5492	1.3428e-06	1.636e-05	4.7124	6.0408	6.0719	5.7413	5.8195	5.7134	5.6566
TCN1	3.7805	0.081477	6.5479	1.3467e-06	1.6397e-05	4.0178	-1.2634	-3.2992	0.83609	1.2247	1.4142	1.5765
PQLC1	-0.32683	7.0692	-6.5465	1.3511e-06	1.6439e-05	4.5642	7.243	7.2084	7.0899	7.0713	6.9516	6.8513
YTHDF2	0.32983	6.7397	6.5445	1.3572e-06	1.6499e-05	4.6039	6.5207	6.5794	6.7717	6.8063	6.8855	6.8745
TMEM14B	-0.39762	6.8129	-6.5443	1.3578e-06	1.6499e-05	4.5856	7.012	6.9878	6.8223	6.8633	6.4794	6.7127
ANKRD18B	-0.50627	4.7724	-6.5418	1.3656e-06	1.6584e-05	4.8751	5.1215	5.0468	4.7844	4.5292	4.56	4.5927
PODXL2	0.40798	5.394	6.5405	1.3697e-06	1.6622e-05	4.7966	5.1395	5.1692	5.4572	5.4699	5.587	5.541
RPL12	-0.26087	10.389	-6.5394	1.3733e-06	1.6655e-05	4.2968	10.484	10.526	10.375	10.46	10.214	10.273
SNRPE	0.35621	6.4829	6.5361	1.3836e-06	1.6769e-05	4.6171	6.265	6.2733	6.5072	6.5972	6.6658	6.589
PAQR8	0.84245	3.1093	6.5343	1.3891e-06	1.6825e-05	5.3002	2.7149	2.4716	3.2542	3.3578	3.3724	3.4849
LINC00936	-1.3423	1.3669	-6.5316	1.3977e-06	1.6918e-05	5.4381	2.0653	2.0442	1.5731	1.0763	0.77442	0.66793
CCDC71L	-0.60509	3.7128	-6.5304	1.4017e-06	1.6955e-05	5.079	4.1272	4.0136	3.6196	3.567	3.533	3.4162
HSD17B8	-0.49874	4.4392	-6.5299	1.403e-06	1.6957e-05	4.9255	4.7312	4.6883	4.3633	4.4423	4.1566	4.2536
COLGALT1	0.31625	7.1528	6.5297	1.4036e-06	1.6957e-05	4.5236	7.0204	6.9461	7.164	7.1877	7.2888	7.3095
CBR1	0.51442	4.7529	6.5289	1.4063e-06	1.6978e-05	4.8984	4.379	4.5822	4.754	4.823	4.945	5.0343
NOLC1	0.32978	7.9778	6.5256	1.4169e-06	1.7088e-05	4.4394	7.7997	7.779	7.9712	8.0833	8.0562	8.1772
ATF5	-0.39628	5.9181	-6.5255	1.4172e-06	1.7088e-05	4.6483	6.168	6.0858	5.9299	5.8531	5.8045	5.6671
GLS	0.35491	6.8924	6.5252	1.4183e-06	1.709e-05	4.5411	6.789	6.6151	6.9086	6.927	7.0577	7.0571
ANLN	-0.32296	6.759	-6.5246	1.4201e-06	1.7101e-05	4.5397	7	6.9317	6.6713	6.6652	6.638	6.6476
HIVEP2	1.8854	1.3759	6.5224	1.4274e-06	1.7177e-05	5.3262	-0.29821	0.48736	1.9088	2.2406	1.8559	2.0607
HIST1H3A	-0.33075	6.6678	-6.5215	1.4301e-06	1.7199e-05	4.5476	6.8562	6.8048	6.6567	6.6921	6.4729	6.524
SEMA4B	-0.49716	4.7987	-6.5211	1.4316e-06	1.7206e-05	4.8264	5.17	4.9908	4.7779	4.6713	4.6542	4.528
ZNF641	0.76137	3.2396	6.5194	1.4371e-06	1.7261e-05	5.2404	2.7236	2.7754	3.4565	3.4594	3.5164	3.5063
PARP1	0.31243	7.8215	6.5176	1.443e-06	1.7321e-05	4.4334	7.6361	7.6632	7.8008	7.9075	7.9319	7.9897
MELTF	0.61979	4.2976	6.5159	1.4487e-06	1.7378e-05	4.9796	3.946	3.9506	4.5004	4.2383	4.6374	4.5128
CLN8	-0.44929	4.6946	-6.5101	1.4679e-06	1.7597e-05	4.8172	4.9872	4.9815	4.5467	4.5865	4.5122	4.5533
PTPRF	-1.586	0.99975	-6.5089	1.4719e-06	1.7634e-05	5.3646	1.693	1.7276	1.4266	0.86214	0.27098	0.018267
RDH11	-0.3421	6.2746	-6.5063	1.4806e-06	1.7727e-05	4.5574	6.4609	6.4439	6.2304	6.2918	6.1083	6.1121
MUL1	0.55126	4.2203	6.5011	1.4983e-06	1.7927e-05	4.9591	3.9608	3.8525	4.3194	4.2712	4.461	4.4565
NARF-IT1	-1.4177	0.93171	-6.5	1.502e-06	1.7959e-05	5.3597	1.7621	1.7967	0.50167	0.75965	0.53137	0.23877
RALA	0.52009	4.4994	6.4986	1.507e-06	1.8007e-05	4.8887	4.2223	4.1846	4.5743	4.5802	4.6588	4.7761
NOC2L	0.30296	7.3032	6.4976	1.5104e-06	1.8036e-05	4.4332	7.1425	7.1518	7.2995	7.3241	7.465	7.4364
GLRX	-0.40886	5.1571	-6.4953	1.5181e-06	1.8118e-05	4.7006	5.3948	5.3823	5.0753	5.1282	4.9938	4.9682
THRA	-0.39264	5.3437	-6.4945	1.5209e-06	1.8139e-05	4.6609	5.6198	5.5693	5.2221	5.2497	5.1868	5.2148
MIDN	-0.43876	5.3027	-6.4889	1.5405e-06	1.8361e-05	4.656	5.588	5.5381	5.2781	5.1494	5.2056	5.057
SCARB2	-0.40323	5.6068	-6.4885	1.5419e-06	1.8366e-05	4.6062	5.7783	5.9126	5.4931	5.5774	5.412	5.4671
C1QBP	0.36824	7.5202	6.4861	1.5503e-06	1.8454e-05	4.3881	7.299	7.339	7.4728	7.6424	7.6162	7.7521
FAM160B2	0.49807	4.7599	6.4849	1.5545e-06	1.8493e-05	4.7994	4.4277	4.512	4.884	4.7898	5.0282	4.9176
ADCY3	0.65298	4.0947	6.4835	1.5598e-06	1.8533e-05	4.9552	3.7084	3.7342	4.343	4.0375	4.3584	4.3864
TAB3	-0.46282	4.6073	-6.4834	1.5599e-06	1.8533e-05	4.7731	4.9207	4.8896	4.4977	4.4601	4.3971	4.4783
EZR	0.28332	8.7634	6.4811	1.5681e-06	1.8619e-05	4.2725	8.5965	8.6073	8.7627	8.8458	8.8523	8.9158
HLA-F-AS1	-0.69376	3.3466	-6.4802	1.5714e-06	1.8645e-05	5.0538	3.6366	3.7903	3.3676	3.2263	3.0963	2.9626
CDK6	0.30939	7.9516	6.4752	1.5896e-06	1.885e-05	4.3228	7.8069	7.7702	7.9065	8.0307	8.086	8.109
INO80D	-0.43358	6.0158	-6.4745	1.592e-06	1.8866e-05	4.5166	6.3523	6.1241	6.0616	5.9401	5.851	5.7655
UBE2N	0.41206	6.279	6.4708	1.6057e-06	1.9016e-05	4.4931	5.9894	6.0986	6.2944	6.3898	6.3638	6.5379
PLEKHB2	0.33055	6.8474	6.4692	1.6116e-06	1.9074e-05	4.4182	6.6013	6.688	6.9066	6.9402	6.9522	6.9957
TMED8	0.42556	5.309	6.4677	1.6169e-06	1.9125e-05	4.6419	5.1016	5.0486	5.2917	5.4113	5.4949	5.506
KSR1	0.36681	6.9067	6.4666	1.6211e-06	1.9163e-05	4.4021	6.7576	6.6875	6.9951	6.8186	7.1167	7.0648
MYO9A	-0.31743	6.7256	-6.4637	1.6317e-06	1.9276e-05	4.4054	6.8919	6.9021	6.7069	6.6953	6.5635	6.594
EXOC7	0.34829	6.7301	6.4627	1.6355e-06	1.9309e-05	4.4151	6.5722	6.4936	6.8244	6.7248	6.9144	6.8515
CLK4	-0.45111	4.9236	-6.4601	1.6451e-06	1.9403e-05	4.6649	5.1508	5.1838	4.9639	4.8166	4.6858	4.7404
CBX2	0.5046	4.7461	6.46	1.6456e-06	1.9403e-05	4.7428	4.4748	4.4516	4.876	4.7278	5.027	4.9194
ADCK5	-0.52329	4.746	-6.4583	1.6521e-06	1.9467e-05	4.6923	5.1099	4.9685	4.8163	4.5486	4.5139	4.5186
KCNS1	0.59759	3.974	6.4576	1.6546e-06	1.9485e-05	4.9263	3.5316	3.6665	4.1125	4.1397	4.203	4.1904
DCAF6	-0.31247	6.9118	-6.4556	1.6624e-06	1.9561e-05	4.3661	7.0724	7.1031	6.8897	6.8566	6.762	6.7872
PRKCQ	0.60848	4.2676	6.4554	1.6632e-06	1.9561e-05	4.8475	3.7472	4.0948	4.369	4.3439	4.5055	4.5453
IFIT1B	-2.0829	0.083774	-6.4541	1.6679e-06	1.9604e-05	5.0567	0.85203	1.5184	-0.052266	-0.019218	-0.87926	-0.91703
ACSL6	-1.9902	0.17298	-6.4504	1.6823e-06	1.9761e-05	5.0742	1.0585	1.3446	-0.18059	0.42215	-0.87926	-0.72755
ARSD	1.8291	1.1174	6.4466	1.697e-06	1.9921e-05	5.1376	0.072156	-0.12931	1.4266	1.7641	1.688	1.8831
CHM	0.72159	3.4691	6.4423	1.7138e-06	2.0105e-05	5.016	3.0202	2.9825	3.6147	3.7608	3.6835	3.7529
CRIP2	-1.8787	0.31273	-6.4411	1.7184e-06	2.0146e-05	5.0841	1.1124	1.2736	0.62196	0.20534	-0.56439	-0.77264
MIER1	0.3717	6.7946	6.4402	1.7218e-06	2.0162e-05	4.3557	6.646	6.5283	6.8338	6.8488	6.8771	7.0334
PRMT1	0.31191	7.3931	6.4402	1.7219e-06	2.0162e-05	4.2923	7.1974	7.244	7.4278	7.4283	7.4865	7.5745
PRR5	-0.49883	4.3423	-6.4383	1.7292e-06	2.0236e-05	4.7172	4.7095	4.6654	4.1597	4.1243	4.266	4.1289
CERS6	0.44461	5.0363	6.4379	1.7311e-06	2.0245e-05	4.6327	4.7861	4.7397	5.1321	5.152	5.1625	5.2455
GLO1	0.34596	7.3027	6.4372	1.7338e-06	2.0259e-05	4.2966	7.0484	7.1348	7.3289	7.4346	7.3789	7.4906
IFI27	-0.54414	4.1494	-6.437	1.7345e-06	2.0259e-05	4.7854	4.4357	4.3489	4.2804	4.138	3.8333	3.8602
PRKAR1A	0.33621	6.8929	6.4343	1.7454e-06	2.0374e-05	4.3338	6.6709	6.6714	6.9451	7.0574	6.9819	7.0305
RP11-79O8.1	-1.1833	1.6066	-6.4308	1.7594e-06	2.0524e-05	5.213	2.1058	2.2676	1.6123	1.6824	0.88213	1.0893
RPL32	-0.26006	9.6989	-6.4301	1.762e-06	2.0541e-05	4.0848	9.819	9.8066	9.697	9.7676	9.5207	9.5828
IL1RL1	5.4838	-0.38744	6.4297	1.7636e-06	2.0547e-05	2.1665	-2.1963	-5.6212	1.1074	1.2375	1.4843	1.6637
CCDC14	-0.31731	7.4054	-6.4291	1.766e-06	2.0563e-05	4.2582	7.6283	7.5131	7.4209	7.3638	7.2433	7.263
TNNI3	-1.6543	0.65105	-6.4288	1.7673e-06	2.0565e-05	5.1646	1.5634	1.5184	0.83609	0.25642	-0.25953	-0.0084508
SEPHS1	0.40563	5.4239	6.4258	1.7795e-06	2.0694e-05	4.519	5.2138	5.2267	5.3783	5.476	5.6044	5.6443
FAM98A	0.43258	5.2632	6.4253	1.7815e-06	2.0701e-05	4.5586	5.0122	4.9778	5.3481	5.395	5.3664	5.4798
TWSG1	0.40988	6.4585	6.4251	1.7823e-06	2.0701e-05	4.3629	6.2959	6.1516	6.4447	6.5981	6.5647	6.6963
TRIM33	-0.32941	6.6408	-6.4239	1.7873e-06	2.0746e-05	4.3216	6.8646	6.7736	6.6277	6.6003	6.4819	6.497
UBASH3B	0.91788	2.8309	6.4209	1.7994e-06	2.086e-05	5.1077	2.119	2.2553	3.1108	3.289	3.1141	3.0971
C16orf58	-0.36421	6.1698	-6.4208	1.8002e-06	2.086e-05	4.3702	6.3254	6.4105	6.1839	6.0871	6.0402	5.9714
CARMIL2	1.2942	1.7325	6.4207	1.8005e-06	2.086e-05	5.1951	0.88339	0.97874	2.0726	2.022	2.1853	2.2529
HIST1H3B	-0.2522	9.3633	-6.418	1.8114e-06	2.0974e-05	4.0766	9.5009	9.5181	9.3055	9.3418	9.2427	9.2709
SYTL3	-0.65784	3.3523	-6.4161	1.8196e-06	2.1056e-05	4.905	3.6684	3.756	3.315	3.2828	2.9944	3.0971
MAST4	0.73864	3.5254	6.4148	1.8251e-06	2.1105e-05	4.9342	3.0342	3.1371	3.5505	3.7957	3.773	3.862
SMIM24	-2.7071	-0.5893	-6.414	1.8285e-06	2.1132e-05	4.526	0.78718	0.64562	-0.47757	-0.70643	-1.2826	-2.502
HSBP1L1	-0.69947	3.3778	-6.4121	1.8363e-06	2.12e-05	4.885	3.7975	3.7342	3.2292	3.3283	3.2288	2.9488
EBPL	0.50804	4.6372	6.4116	1.8383e-06	2.12e-05	4.6557	4.3229	4.3774	4.6728	4.748	4.7835	4.9185
ENTPD5	-0.45949	4.5741	-6.4115	1.839e-06	2.12e-05	4.6182	4.8291	4.8596	4.4951	4.4844	4.4187	4.358
WDCP	0.5631	4.1048	6.4115	1.839e-06	2.12e-05	4.7767	3.8016	3.7903	4.1827	4.126	4.4061	4.3222
KIAA1715	-0.38096	5.9296	-6.4074	1.8564e-06	2.1388e-05	4.37	6.2034	6.0918	5.8189	5.9328	5.7415	5.789
MTMR1	0.45463	4.9093	6.4038	1.8717e-06	2.1551e-05	4.5811	4.6215	4.6279	4.9772	5.0678	5.0947	5.0667
NME4	-0.31342	6.8233	-6.3985	1.8944e-06	2.1799e-05	4.2413	7.0004	7.0139	6.7405	6.7975	6.6937	6.6937
FAM101B	0.77629	3.1043	6.3972	1.9003e-06	2.1853e-05	4.9834	2.5969	2.6689	3.291	3.2517	3.4088	3.4087
TAP1	0.60491	4.4009	6.3924	1.9213e-06	2.2081e-05	4.6678	3.9754	4.1651	4.3224	4.6001	4.6435	4.6987
NDRG3	0.69349	3.4007	6.392	1.9231e-06	2.2088e-05	4.8988	3.006	3.0263	3.4511	3.5076	3.6865	3.7268
UNKL	-0.45832	5.0315	-6.3902	1.9309e-06	2.2164e-05	4.4761	5.3322	5.2714	5.0397	4.8482	4.8983	4.7994
RBMS1	0.48042	4.9196	6.389	1.9362e-06	2.2211e-05	4.537	4.55	4.7808	4.9391	4.9602	5.1322	5.1551
S100A4	0.30114	7.1948	6.3882	1.9395e-06	2.2236e-05	4.1881	7.0698	7.0261	7.1849	7.1895	7.349	7.3493
ANKRD36C	-0.61363	6.9451	-6.387	1.9452e-06	2.2287e-05	4.1956	7.3668	7.2885	7.072	6.5111	6.7549	6.6775
ZNF445	0.36067	5.9925	6.3839	1.9587e-06	2.2413e-05	4.3308	5.8195	5.7413	6.0509	6.0627	6.1221	6.1583
CTXN1	1.1174	2.008	6.3838	1.9593e-06	2.2413e-05	5.103	1.3329	1.5184	2.0152	2.0939	2.5544	2.5332
BMF	-1.6634	0.55017	-6.3837	1.9598e-06	2.2413e-05	5.0554	1.2868	1.6172	0.22603	0.6106	-0.25953	-0.18006
KCTD3	0.48126	4.7062	6.3781	1.9851e-06	2.2689e-05	4.5518	4.4009	4.55	4.6564	4.7221	4.9337	4.9742
TMEM86B	-1.1273	1.9267	-6.3747	2.0007e-06	2.2853e-05	5.0643	2.5586	2.3732	2.0005	1.8745	1.6024	1.1509
RP5-890E16.2	-1.018	2.0568	-6.3744	2.0019e-06	2.2853e-05	5.0505	2.6707	2.4395	2.0298	2.1354	1.4979	1.5675
GNPNAT1	0.43671	5.3464	6.3703	2.0209e-06	2.3056e-05	4.4102	5.0662	5.1346	5.3379	5.474	5.4847	5.5813
TBC1D30	1.4111	1.7124	6.3667	2.0379e-06	2.3235e-05	5.0754	1.0024	0.64562	1.9245	2.247	2.1683	2.2863
CIDEB	-1.2739	1.3087	-6.3643	2.049e-06	2.3348e-05	5.0722	2.1321	1.8945	1.0225	1.2997	0.81847	0.68471
DDHD1	-0.31785	6.8281	-6.3621	2.0593e-06	2.345e-05	4.1547	7.0488	7.0016	6.7906	6.7129	6.7055	6.7091
ACO1	0.41584	5.7513	6.3602	2.0684e-06	2.354e-05	4.3217	5.3988	5.5494	5.8925	5.8975	5.8195	5.9503
M6PR	0.3155	7.0111	6.3593	2.0727e-06	2.3574e-05	4.1442	6.8085	6.8142	7.0631	7.1296	7.1015	7.1499
KIF1B	0.5175	4.4492	6.3583	2.0775e-06	2.3615e-05	4.5786	4.15	4.122	4.4899	4.6246	4.6603	4.6483
CDC20	-0.3154	7.3831	-6.3519	2.1082e-06	2.3949e-05	4.0769	7.5265	7.6302	7.2645	7.3521	7.2602	7.2651
SFPQ	0.2572	9.1259	6.3515	2.1102e-06	2.3958e-05	3.9417	9.014	8.9675	9.1592	9.119	9.2433	9.2523
TM7SF2	-0.53501	4.0823	-6.345	2.1419e-06	2.4303e-05	4.574	4.3873	4.3633	3.98	4.0647	3.9142	3.7844
ECHDC1	0.38334	6.1875	6.343	2.1517e-06	2.4399e-05	4.2067	5.9921	5.9454	6.192	6.2987	6.2816	6.4151
SLC2A3	1.4421	1.686	6.341	2.1615e-06	2.4495e-05	5.0135	0.41033	0.94869	2.2323	2.3088	2.044	2.1719
FAM53B	-0.33378	6.5354	-6.3395	2.1691e-06	2.4566e-05	4.1334	6.6932	6.7885	6.4447	6.4687	6.4389	6.3782
RARG	-0.95976	2.1709	-6.3392	2.1708e-06	2.4571e-05	4.9513	2.625	2.7142	2.1142	2.1148	1.8453	1.612
HDAC6	-0.39887	6.5913	-6.3366	2.1838e-06	2.4702e-05	4.1207	6.8126	6.8262	6.6496	6.4125	6.4772	6.3698
NF1	0.40703	5.8609	6.3362	2.186e-06	2.4712e-05	4.2414	5.7349	5.5126	5.9376	5.917	6.0297	6.0333
ST8SIA4	0.74846	3.3276	6.3335	2.1994e-06	2.4843e-05	4.8029	2.9103	2.7231	3.5454	3.6529	3.5722	3.5618
CLSTN1	0.71685	3.4588	6.333	2.2021e-06	2.4843e-05	4.7507	3.1091	3.0263	3.6434	3.4067	3.773	3.7941
UBE2J1	0.39104	6.3048	6.3328	2.2027e-06	2.4843e-05	4.1682	6.0091	6.1358	6.3139	6.4497	6.4077	6.5126
PTK2B	-0.42675	5.5046	-6.3328	2.2029e-06	2.4843e-05	4.2616	5.7742	5.7069	5.5599	5.3523	5.3524	5.2818
XRCC5	0.28086	9.1333	6.3284	2.2253e-06	2.5081e-05	3.8882	8.9332	9.0137	9.1301	9.2163	9.2202	9.2859
ADAM8	-0.71204	3.0743	-6.3232	2.2523e-06	2.5369e-05	4.7627	3.4237	3.3816	3.1447	3.0992	2.7433	2.6531
PARP16	-0.54999	4.0065	-6.3196	2.271e-06	2.5565e-05	4.5354	4.2882	4.311	4.0388	3.9197	3.6776	3.8037
ZKSCAN3	0.39799	5.4012	6.3164	2.2875e-06	2.5735e-05	4.2745	5.2061	5.1211	5.4733	5.4854	5.5433	5.5779
PCBD1	0.67114	3.7312	6.3138	2.3015e-06	2.5877e-05	4.6533	3.3071	3.3359	3.8089	3.9703	3.9066	4.0582
MRPS10	-0.33491	7.1841	-6.3131	2.3051e-06	2.5901e-05	4.0082	7.3138	7.3888	7.1673	7.2093	6.9411	7.0845
SF3A3	0.32021	7.2478	6.3114	2.3142e-06	2.5988e-05	4.0068	6.9892	7.1218	7.3036	7.3232	7.3565	7.3927
ETV4	1.25	1.9144	6.311	2.3162e-06	2.5995e-05	4.9525	1.1897	1.147	2.2819	1.9996	2.5281	2.3402
HEXB	0.34483	6.1668	6.3077	2.3341e-06	2.618e-05	4.1237	5.9831	5.9801	6.1543	6.2305	6.3228	6.3297
PHB	0.3253	7.4066	6.3071	2.3372e-06	2.6199e-05	3.9816	7.2105	7.208	7.4391	7.5187	7.4687	7.5947
ATAD3A	0.35646	6.1406	6.3058	2.3445e-06	2.6265e-05	4.1218	5.9155	6.0023	6.1291	6.1618	6.3554	6.2792
ZNF329	0.57762	3.9691	6.3049	2.349e-06	2.63e-05	4.558	3.6273	3.7165	3.9762	4.008	4.1968	4.2897
RASGEF1B	-1.0904	1.6558	-6.3046	2.3505e-06	2.6301e-05	4.9221	2.3941	2.218	1.4266	1.4824	1.1469	1.2669
RHOB	-0.71119	5.2681	-6.3026	2.3616e-06	2.641e-05	4.2317	5.7187	5.5355	5.5333	4.965	5.0434	4.8128
TMEM184B	0.58041	4.058	6.3015	2.3675e-06	2.646e-05	4.5359	3.6774	3.7818	4.116	4.138	4.3843	4.2508
OTUD1	-0.78564	2.9925	-6.3008	2.3716e-06	2.6479e-05	4.7247	3.5066	3.2337	3.0761	2.9404	2.6791	2.5192
PCED1B	1.0438	2.2416	6.3007	2.3721e-06	2.6479e-05	4.9058	1.5634	1.6172	2.4964	2.4957	2.6671	2.6098
PLEKHO2	1.1872	1.9642	6.2982	2.3855e-06	2.6613e-05	4.9222	1.0585	1.4123	2.194	2.2782	2.425	2.4175
NR1D2	-0.62458	3.6158	-6.2972	2.3912e-06	2.6658e-05	4.5747	4.0499	3.828	3.5953	3.602	3.273	3.3468
MAGEF1	1.6282	1.1033	6.297	2.3924e-06	2.6658e-05	4.8695	-0.041054	0.44492	1.2386	1.2997	1.9078	1.7697
ENTPD4	0.4089	5.3816	6.2961	2.397e-06	2.6693e-05	4.2262	5.2353	5.0939	5.4314	5.3807	5.5742	5.574
RP11-620J15.3	-0.38311	5.4679	-6.2931	2.4137e-06	2.6863e-05	4.1853	5.6151	5.6403	5.5699	5.4974	5.219	5.2658
NBPF1	0.75541	3.4281	6.2917	2.4215e-06	2.6934e-05	4.668	2.856	3.1503	3.6339	3.4263	3.7101	3.7921
PANX2	-1.9597	0.21804	-6.2896	2.4333e-06	2.7036e-05	4.7746	1.0585	1.4123	0.45923	-0.24922	-0.45545	-0.91703
SRRT	0.30551	7.0761	6.2896	2.4336e-06	2.7036e-05	3.9694	6.9458	6.9017	7.0816	7.0713	7.2008	7.2553
BCL2L1	-0.32173	6.6356	-6.2883	2.4409e-06	2.7101e-05	4.0036	6.7812	6.8614	6.5621	6.6104	6.4951	6.5032
STOML1	-0.68941	3.1662	-6.2879	2.443e-06	2.7109e-05	4.6581	3.5755	3.4314	3.1778	3.1841	2.8103	2.818
IL2RG	2.7052	0.2711	6.2876	2.4446e-06	2.711e-05	4.1905	-1.0119	-1.9207	0.99306	1.0476	1.3556	1.163
AGAP2	0.59315	4.2206	6.2857	2.4552e-06	2.7211e-05	4.4643	3.76	3.9954	4.343	4.2681	4.5552	4.4017
CLSTN3	0.67719	3.7754	6.2844	2.4629e-06	2.728e-05	4.5621	3.4914	3.3417	3.895	3.7113	4.1989	4.0141
HIST1H2BM	-0.31351	7.8579	-6.2782	2.4981e-06	2.7654e-05	3.8641	8.0691	7.9955	7.8949	7.7496	7.7278	7.7107
ADSS	0.37963	5.5571	6.2773	2.5032e-06	2.7692e-05	4.1528	5.3617	5.3103	5.6429	5.5955	5.7199	5.7123
CEP290	-0.384	5.3642	-6.277	2.5052e-06	2.7692e-05	4.1577	5.5408	5.5962	5.3668	5.3152	5.1678	5.1981
ACKR1	-0.96792	2.149	-6.2768	2.5064e-06	2.7692e-05	4.8222	2.539	2.6596	2.2197	2.2406	1.538	1.6972
ATP8B3	-0.45392	4.798	-6.2766	2.5075e-06	2.7692e-05	4.2529	5.0781	5.0991	4.7671	4.5739	4.6389	4.6311
PDK2	-0.64072	3.6227	-6.2756	2.513e-06	2.7736e-05	4.5317	3.7893	4.0388	3.7352	3.6265	3.2809	3.2655
LDB1	-0.27086	8.7739	-6.2728	2.5294e-06	2.7901e-05	3.7778	8.913	8.9609	8.7572	8.6788	8.6905	8.6434
PLOD1	0.38881	5.6496	6.2707	2.5421e-06	2.8024e-05	4.1211	5.3728	5.4828	5.6605	5.7483	5.8242	5.8092
MS4A2	3.2278	-0.2237	6.2658	2.571e-06	2.8327e-05	3.8372	-1.4078	-2.4512	0.06557	-0.081279	1.0393	1.4933
ZNF71	1.3469	1.6199	6.264	2.5812e-06	2.8422e-05	4.8514	0.64802	1.037	1.7241	1.9462	2.1512	2.213
SH3BP1	0.89126	2.6145	6.26	2.6052e-06	2.8658e-05	4.7493	2.2208	2.0723	2.6646	2.6373	3.0919	3
GNAI3	0.3135	6.8619	6.26	2.6057e-06	2.8658e-05	3.9271	6.676	6.6582	6.9174	6.9611	6.9513	7.0072
HIST1H2BC	-0.32732	8.2132	-6.2561	2.6292e-06	2.8899e-05	3.7845	8.4139	8.3329	8.1873	8.2596	7.9574	8.1279
CALM1	0.33672	6.6375	6.2533	2.646e-06	2.9067e-05	3.9376	6.3739	6.4929	6.6823	6.7383	6.7513	6.7865
CUL9	-0.40393	6.0989	-6.2485	2.6756e-06	2.9375e-05	3.9729	6.4241	6.2542	6.1078	5.9313	5.9723	5.9036
DMXL1	-0.31794	6.4937	-6.2476	2.681e-06	2.9417e-05	3.927	6.6563	6.6558	6.4629	6.5121	6.3285	6.3466
SIPA1	-0.3984	5.1191	-6.2394	2.7325e-06	2.9965e-05	4.1062	5.3393	5.4019	4.9921	5.0325	4.9986	4.9501
ATP5A1	0.25863	9.7471	6.2366	2.7502e-06	3.0141e-05	3.6295	9.5696	9.6421	9.7288	9.8141	9.8503	9.8776
FRRS1L	0.74522	3.7528	6.2317	2.7812e-06	3.0455e-05	4.4675	3.3804	3.1894	3.8215	4.0913	3.9117	4.1228
RFFL	-0.45958	4.6006	-6.2316	2.7822e-06	3.0455e-05	4.1982	4.894	4.7977	4.5543	4.5727	4.44	4.3448
MACROD1	-0.48778	4.6912	-6.2292	2.7978e-06	3.0608e-05	4.1741	4.821	5.0732	4.6634	4.6736	4.4558	4.4601
PDCD6	0.3388	6.154	6.2248	2.826e-06	3.0899e-05	3.934	5.9428	5.9567	6.2073	6.2424	6.2663	6.3082
LAMC3	1.1163	2.0379	6.2219	2.8455e-06	3.1093e-05	4.7447	1.2868	1.4769	2.306	2.1758	2.4532	2.5285
HIST1H4K	-0.52064	4.5117	-6.2208	2.8526e-06	3.1153e-05	4.1927	4.7073	4.8657	4.3974	4.5865	4.1884	4.3249
MBD3	0.32618	6.5043	6.2203	2.8557e-06	3.1162e-05	3.8739	6.2959	6.3493	6.5305	6.5497	6.6804	6.6201
IL27RA	0.55018	4.2195	6.2202	2.8567e-06	3.1162e-05	4.3173	3.7642	3.9657	4.4002	4.3586	4.4151	4.4131
SESN3	-0.37334	5.9799	-6.2192	2.8632e-06	3.1207e-05	3.9229	6.2211	6.1598	5.8602	6.0092	5.7762	5.853
TNFRSF8	1.1358	2.0093	6.219	2.8642e-06	3.1207e-05	4.7396	1.2391	1.4769	2.0726	2.2782	2.508	2.4813
PSMB8	0.52534	4.4107	6.2162	2.8832e-06	3.1396e-05	4.2614	4.067	4.081	4.5211	4.6112	4.5272	4.6568
TMPRSS9	-2.4813	-0.37806	-6.2154	2.8886e-06	3.1435e-05	4.1964	0.61102	0.71868	-0.2493	0.25642	-1.7132	-1.8919
CD2BP2	0.40288	5.4943	6.2134	2.9016e-06	3.1556e-05	4.0126	5.2123	5.3367	5.4931	5.5642	5.7177	5.6416
MGEA5	-0.28187	7.8709	-6.2132	2.903e-06	3.1556e-05	3.7092	8.0803	8.0015	7.8297	7.795	7.7687	7.7504
MTMR2	0.41706	5.1601	6.2125	2.9081e-06	3.1592e-05	4.0798	4.9226	4.8817	5.2189	5.3023	5.2951	5.3399
MAFG	-0.35526	6.4391	-6.2092	2.9301e-06	3.1813e-05	3.8387	6.6921	6.6116	6.3535	6.3744	6.3795	6.2232
JAKMIP1	-0.61955	4.0922	-6.2047	2.9611e-06	3.2131e-05	4.2396	4.3143	4.5649	3.9458	4.0503	3.9836	3.6941
VPS37B	0.38806	6.0218	6.2041	2.9649e-06	3.2153e-05	3.9015	5.7403	5.9088	5.9644	6.0933	6.2136	6.2106
FAM46B	-1.2651	1.3478	-6.2029	2.973e-06	3.2223e-05	4.7167	1.8599	2.0723	1.4912	1.2247	0.84	0.59881
INPP1	1.2529	1.8179	6.2026	2.9754e-06	3.223e-05	4.7165	1.0857	0.91799	2.2573	2.1625	2.1598	2.3242
SLCO4A1	0.69208	3.4715	6.2018	2.9807e-06	3.2268e-05	4.4538	3.0756	3.0118	3.7173	3.5441	3.7674	3.7126
RPS2P5	-0.27658	8.3762	-6.1979	3.0078e-06	3.2543e-05	3.6357	8.4623	8.5274	8.3853	8.4479	8.1912	8.243
MCCC2	0.38699	5.4223	6.1933	3.0403e-06	3.2876e-05	3.9739	5.2337	5.2282	5.3854	5.4454	5.6523	5.5885
AGO2	-0.3187	7.8385	-6.1923	3.0473e-06	3.2932e-05	3.663	8.1115	7.9263	7.7877	7.8044	7.7032	7.698
ZNF805	-0.51717	4.6405	-6.1912	3.0547e-06	3.2993e-05	4.0919	4.998	4.8454	4.6774	4.4897	4.5105	4.3222
TNK2-AS1	-1.7525	0.64548	-6.1903	3.061e-06	3.3042e-05	4.6503	1.4632	1.6172	1.0796	0.15239	-0.25953	-0.18006
RCN1	0.47638	4.8213	6.1894	3.0676e-06	3.3094e-05	4.0958	4.4567	4.6398	4.8638	4.9291	4.9745	5.0643
AC016757.3	-0.61576	3.5843	-6.1887	3.0724e-06	3.3127e-05	4.3228	4.0255	3.8321	3.5656	3.443	3.3575	3.2821
C15orf57	-0.44401	4.7779	-6.1863	3.0899e-06	3.3296e-05	4.0503	5.0832	5.0036	4.682	4.7141	4.5256	4.6589
PRPF4	0.37327	5.6965	6.1835	3.1097e-06	3.3491e-05	3.9033	5.4495	5.568	5.6826	5.7139	5.8979	5.8673
TNFSF9	-0.64862	4.3915	-6.1802	3.134e-06	3.3732e-05	4.1182	4.8629	4.616	4.5391	4.126	4.1842	4.0207
CROCCP2	-0.5339	5.852	-6.1791	3.1418e-06	3.3797e-05	3.8435	6.2049	6.0935	5.9568	5.606	5.7536	5.4971
ZDHHC6	0.43122	4.9733	6.177	3.1569e-06	3.394e-05	4.0291	4.7117	4.7615	5.0505	4.9756	5.2025	5.1384
APOE	0.33657	6.4787	6.1763	3.1624e-06	3.3979e-05	3.7749	6.2753	6.2884	6.4856	6.5826	6.6552	6.5853
RPS2	-0.2408	11.009	-6.1753	3.1697e-06	3.4039e-05	3.4094	11.122	11.091	11.013	11.095	10.828	10.902
DOHH	0.50854	4.8077	6.1747	3.1741e-06	3.4066e-05	4.0651	4.5622	4.4729	4.9468	4.7941	5.1246	4.9457
TRIM23	-0.49262	4.3134	-6.1737	3.1811e-06	3.4121e-05	4.1214	4.6628	4.5298	4.2743	4.2159	4.0567	4.1411
POLR1B	0.36291	5.906	6.1702	3.2071e-06	3.438e-05	3.8401	5.7155	5.7081	5.9024	5.9667	6.0238	6.1195
KIAA0232	-0.35251	6.2651	-6.1697	3.2108e-06	3.44e-05	3.7677	6.4937	6.4546	6.1534	6.2531	6.0575	6.1784
C19orf43	0.30546	6.7593	6.166	3.2388e-06	3.468e-05	3.7136	6.6207	6.5788	6.7668	6.779	6.9048	6.9057
ATP6V0E2	0.97206	2.4205	6.1655	3.2428e-06	3.4703e-05	4.5766	1.7954	1.8626	2.6646	2.6228	2.7145	2.863
DHX33	0.40396	5.3131	6.1644	3.2508e-06	3.4769e-05	3.9305	5.0849	5.1042	5.4009	5.297	5.4641	5.5277
DPH6	-0.51338	4.4716	-6.1636	3.2571e-06	3.4817e-05	4.0694	4.8311	4.635	4.4444	4.4991	4.1262	4.2938
TMEM98	0.67422	3.562	6.1593	3.2897e-06	3.5144e-05	4.3393	3.0342	3.2086	3.7083	3.8382	3.7674	3.8152
GABPA	0.39642	5.6258	6.1527	3.3404e-06	3.5666e-05	3.8468	5.3866	5.4307	5.5983	5.7354	5.7586	5.8451
RASSF3	0.91221	2.8313	6.1486	3.3726e-06	3.5989e-05	4.4691	2.458	2.1404	3.0334	2.9674	3.0738	3.3148
PPP5C	0.34439	6.0583	6.1476	3.38e-06	3.6048e-05	3.7632	5.9184	5.8264	6.0783	6.0941	6.2033	6.2293
TET3	-0.33823	6.1931	-6.1442	3.4066e-06	3.6311e-05	3.7153	6.459	6.3493	6.1138	6.1011	6.0938	6.0419
ANKRD36BP2	-0.32337	6.5413	-6.1437	3.4109e-06	3.6336e-05	3.6725	6.7539	6.7251	6.5227	6.4157	6.3991	6.4314
CDC25A	0.37814	5.8434	6.1418	3.4258e-06	3.6471e-05	3.7817	5.57	5.7358	5.8199	5.8757	6.012	6.0467
PYCARD	2.0499	0.89168	6.1416	3.4275e-06	3.6471e-05	4.4567	-0.16391	-0.33577	0.69693	1.535	1.8559	1.7618
UAP1L1	0.8031	3.0587	6.1373	3.4619e-06	3.6816e-05	4.3786	2.539	2.784	3.0478	3.0238	3.585	3.3729
TMPRSS11F	-1.8112	0.12879	-6.1366	3.4676e-06	3.6855e-05	4.4331	1.0307	1.1203	-0.115	0.23111	-0.81055	-0.68383
HSD17B10	0.38033	5.8606	6.1283	3.5347e-06	3.7547e-05	3.7538	5.5421	5.7137	5.9682	5.9279	5.9821	6.03
CTR9	0.32989	6.5057	6.1244	3.5673e-06	3.7872e-05	3.648	6.306	6.3327	6.5092	6.5916	6.6112	6.6833
UNC13D	0.33	6.919	6.1229	3.58e-06	3.7973e-05	3.5952	6.7571	6.7195	6.9998	6.8956	7.1242	7.0177
ARHGEF6	0.30148	7.5862	6.1228	3.5809e-06	3.7973e-05	3.5307	7.3476	7.439	7.6385	7.7056	7.6596	7.7266
ABCG2	-0.66617	3.1907	-6.1216	3.5906e-06	3.8054e-05	4.2586	3.5316	3.5858	3.0478	3.207	2.848	2.9243
PGLYRP4	-1.8658	-0.044872	-6.1205	3.5995e-06	3.8127e-05	4.3869	1.0857	0.97874	-0.18059	-0.56671	-0.56439	-1.022
FES	0.43161	4.9102	6.1198	3.6055e-06	3.8169e-05	3.9149	4.6628	4.616	5.027	5.0067	5.108	5.0408
GGT7	0.87211	2.6763	6.117	3.6294e-06	3.84e-05	4.4201	2.0653	2.2676	2.8567	2.8054	2.9944	3.0687
TRIM7	0.63123	3.5625	6.1152	3.644e-06	3.8515e-05	4.2166	3.2541	3.183	3.6147	3.6118	3.8963	3.8152
RIN3	0.68694	3.9574	6.115	3.646e-06	3.8515e-05	4.1492	3.6863	3.3066	4.3075	4.0718	4.1905	4.1816
FBXO45	0.36288	5.6313	6.115	3.6465e-06	3.8515e-05	3.7612	5.3811	5.4129	5.7336	5.7388	5.7755	5.7462
SLC35B2	0.39388	5.3355	6.1142	3.653e-06	3.8563e-05	3.8091	5.1476	5.0767	5.3452	5.4302	5.5101	5.503
C4orf48	1.4399	1.4539	6.1139	3.6558e-06	3.857e-05	4.5087	0.64802	0.35611	1.9245	1.9384	1.8347	2.0216
IFNAR1	0.4145	5.8713	6.1116	3.675e-06	3.8751e-05	3.7147	5.7078	5.5229	5.9152	6.0291	5.9638	6.0891
GTF3C6	0.34754	6.0173	6.1112	3.6789e-06	3.877e-05	3.6851	5.8154	5.8213	6.0266	6.1116	6.1412	6.1876
SMG1P3	-0.77928	4.066	-6.108	3.7061e-06	3.9034e-05	4.0135	4.7029	4.3316	4.2308	3.6433	3.773	3.7146
LZTS2	0.48188	4.6564	6.1036	3.7441e-06	3.9413e-05	3.9325	4.2941	4.4436	4.7297	4.7602	4.9098	4.8013
AC009948.5	0.96411	2.6872	6.1023	3.7557e-06	3.9512e-05	4.3989	2.3272	1.7967	2.9743	2.952	3.0829	2.9899
SHQ1	0.42957	5.0854	6.101	3.7667e-06	3.9605e-05	3.8277	4.8451	4.8536	5.2061	5.0534	5.2565	5.2975
EIF5A	0.25357	9.0573	6.0998	3.7773e-06	3.9689e-05	3.3539	8.9019	8.931	9.0496	9.1223	9.1569	9.1821
THBS3	-0.75577	3.3654	-6.0996	3.7789e-06	3.9689e-05	4.1577	3.8619	3.7604	3.4885	2.9597	3.0919	3.0298
DHRS3	0.70372	3.4654	6.0989	3.7849e-06	3.973e-05	4.2275	3.0272	2.9449	3.6482	3.8086	3.6227	3.7409
NDUFC2	0.86755	3.2849	6.0948	3.8218e-06	4.0094e-05	4.2584	2.625	2.8827	3.2727	3.6648	3.7159	3.5481
USP45	-0.34169	5.9979	-6.0911	3.8545e-06	4.0415e-05	3.6195	6.2379	6.1333	5.9673	5.9629	5.8256	5.8604
ZNF789	0.64325	3.6723	6.0878	3.8846e-06	4.068e-05	4.1331	3.1929	3.4095	3.8382	3.6998	3.9739	3.9199
TOR3A	0.32816	6.5823	6.0877	3.8854e-06	4.068e-05	3.5488	6.4641	6.3757	6.5298	6.6284	6.7414	6.7545
BBOF1	-1.0364	2.152	-6.0876	3.8863e-06	4.068e-05	4.3931	2.7149	2.4926	2.41	2.1009	1.7688	1.425
CHD1L	0.34179	6.1894	6.0873	3.8888e-06	4.0683e-05	3.6014	5.9594	6.0561	6.2017	6.2245	6.3127	6.3818
NIPAL3	-0.40391	5.4984	-6.0834	3.9245e-06	4.1034e-05	3.6824	5.7668	5.6178	5.4971	5.5425	5.2149	5.3511
C19orf12	0.76506	3.1887	6.0826	3.9313e-06	4.1082e-05	4.2435	2.625	2.8009	3.303	3.4263	3.5657	3.4112
MEN1	0.42977	4.852	6.08	3.956e-06	4.1316e-05	3.8221	4.6377	4.6327	4.896	4.8123	5.0834	5.0498
DPM1	0.37536	5.5199	6.0797	3.9585e-06	4.1319e-05	3.6971	5.2443	5.3235	5.6369	5.5943	5.6742	5.6459
PIH1D1	0.32232	6.4964	6.0776	3.9779e-06	4.1499e-05	3.5396	6.2739	6.3327	6.5311	6.5925	6.6022	6.6463
DDX21	0.27219	8.77	6.0764	3.9888e-06	4.1589e-05	3.3182	8.6199	8.6662	8.7095	8.797	8.875	8.9524
HLCS	0.35673	5.6526	6.0741	4.0102e-06	4.1789e-05	3.6529	5.4664	5.4709	5.6617	5.6692	5.8011	5.8465
ULK2	0.78416	2.9838	6.0732	4.0189e-06	4.1856e-05	4.2629	2.4889	2.5133	3.104	3.2102	3.3463	3.2402
SERBP1	0.26598	9.3911	6.0729	4.0221e-06	4.1866e-05	3.2669	9.2329	9.2414	9.3737	9.4943	9.4732	9.5312
SLC12A2	0.53975	4.2236	6.0718	4.0316e-06	4.1941e-05	3.9594	3.9935	3.828	4.2465	4.3629	4.4903	4.4206
KBTBD11	2.3191	0.22648	6.0691	4.0574e-06	4.2186e-05	4.0277	-0.79778	-1.2289	0.58297	0.15239	1.4285	1.2216
KIAA0513	-0.83334	2.4625	-6.0672	4.0752e-06	4.2348e-05	4.2746	3.0272	2.8985	2.3647	2.2595	2.0064	2.2187
TDH	-1.1476	1.4364	-6.0665	4.0817e-06	4.2392e-05	4.41	2.0096	1.9862	1.4912	1.4277	0.86122	0.84254
CTD-2012K14.7	-1.4022	0.98783	-6.0661	4.0863e-06	4.2416e-05	4.4141	1.8756	1.6172	0.62196	1.062	0.5576	0.1926
RP11-417L19.5	-1.3735	0.93492	-6.0631	4.1145e-06	4.2685e-05	4.406	1.6016	1.7967	0.62196	0.97317	0.20613	0.40995
ZNF518B	0.36702	5.555	6.0614	4.1309e-06	4.2831e-05	3.6463	5.359	5.2984	5.6226	5.658	5.6972	5.6948
CBX6	0.36954	5.6808	6.0599	4.1451e-06	4.2954e-05	3.6107	5.4984	5.5305	5.6008	5.6815	5.9315	5.8423
FTX	-0.52269	4.3148	-6.0574	4.1695e-06	4.3183e-05	3.8654	4.5622	4.4991	4.5263	4.2913	3.9811	4.029
MARVELD1	0.60549	3.7813	6.0571	4.1721e-06	4.3187e-05	4.0282	3.5167	3.3873	3.8131	3.8361	4.1371	3.9974
LETM1	0.29329	6.9942	6.0564	4.1795e-06	4.3239e-05	3.4283	6.8641	6.8158	7.0173	7.0021	7.1247	7.1412
LRRC59	0.26718	8.0582	6.0548	4.1947e-06	4.3373e-05	3.3239	7.9083	7.9502	8.0267	8.0725	8.1835	8.2082
RP11-159D12.2	-0.54774	4.3732	-6.0539	4.204e-06	4.3444e-05	3.8364	4.7462	4.5145	4.5237	4.2821	4.1064	4.0663
CARD8	-0.31551	6.4662	-6.0506	4.236e-06	4.3751e-05	3.4643	6.6771	6.5922	6.4454	6.4459	6.3021	6.3347
OAT	-0.25816	8.5043	-6.05	4.2428e-06	4.3781e-05	3.2716	8.6728	8.6527	8.4149	8.4775	8.3867	8.4212
GART	0.28377	8.8717	6.0499	4.2436e-06	4.3781e-05	3.25	8.6916	8.724	8.8777	8.9585	8.9252	9.0532
XRN2	0.29696	7.0205	6.0462	4.2799e-06	4.4131e-05	3.4015	6.8318	6.8972	7.0127	7.0578	7.1698	7.1537
GLRX3	0.31975	6.462	6.0455	4.2871e-06	4.4181e-05	3.4676	6.2394	6.3062	6.5098	6.5342	6.5655	6.6165
MKRN1	-0.31332	6.675	-6.0445	4.2971e-06	4.426e-05	3.4266	6.7947	6.8744	6.636	6.7045	6.5032	6.5371
AGPAT4-IT1	-1.7921	0.4763	-6.0415	4.3272e-06	4.4545e-05	4.2917	1.2631	1.3675	0.99306	0.23111	-0.6221	-0.37488
FAHD2A	-0.40809	5.2609	-6.0411	4.3318e-06	4.4568e-05	3.6245	5.3562	5.5481	5.2902	5.2817	5.0572	5.0319
CHMP7	0.34257	6.006	6.0391	4.3514e-06	4.4744e-05	3.5163	5.8052	5.8098	6.0293	6.0875	6.1855	6.1187
CD52	1.1333	2.0244	6.0379	4.3636e-06	4.4845e-05	4.334	1.1124	1.5587	2.2449	2.2782	2.5347	2.4175
LRRFIP1	0.43356	6.2421	6.0367	4.3757e-06	4.4926e-05	3.4842	5.9984	5.9252	6.2883	6.4626	6.2737	6.5044
FAM111A	0.40178	5.8241	6.0367	4.3763e-06	4.4926e-05	3.5376	5.4908	5.7446	5.822	5.8505	6.0126	6.0238
ZNF143	-0.39478	5.0793	-6.0341	4.4024e-06	4.5169e-05	3.6391	5.2787	5.291	5.0469	5.0882	4.842	4.9291
MAN2C1	-0.39554	7.0573	-6.0299	4.4458e-06	4.5588e-05	3.3481	7.2953	7.2837	7.1187	6.8506	6.9713	6.8241
TGFBRAP1	0.33574	6.0738	6.0297	4.4481e-06	4.5588e-05	3.4833	5.8376	5.9262	6.1181	6.1258	6.2229	6.2124
HDAC1	0.32768	6.3484	6.029	4.4553e-06	4.5636e-05	3.4423	6.1252	6.1994	6.3557	6.4296	6.5011	6.4797
EIF1AY	-0.34326	6.2351	-6.0268	4.4788e-06	4.5853e-05	3.4365	6.36	6.468	6.17	6.2749	6.0466	6.0915
CDC123	0.36582	6.1549	6.0257	4.4902e-06	4.5944e-05	3.4653	5.88	5.9811	6.1985	6.2849	6.2305	6.3542
PRMT6	0.42275	4.867	6.023	4.5183e-06	4.6206e-05	3.6899	4.6377	4.616	4.9039	4.9486	5.0282	5.0675
ZC3H12A	-0.57454	3.6838	-6.0206	4.5443e-06	4.6442e-05	3.9042	3.9935	4.0317	3.6339	3.5415	3.5396	3.3625
PRRC2B	0.31738	6.5824	6.0204	4.5463e-06	4.6442e-05	3.3903	6.4167	6.4112	6.6491	6.5529	6.7506	6.714
DOCK5	0.67257	3.3599	6.0195	4.5554e-06	4.6509e-05	4.043	3.006	2.9675	3.4938	3.3637	3.6954	3.6327
ZGRF1	-0.32247	6.2442	-6.0185	4.5663e-06	4.6595e-05	3.4159	6.4334	6.3904	6.2693	6.1941	6.0798	6.0981
SNX30	0.78083	2.959	6.0165	4.587e-06	4.678e-05	4.1299	2.5586	2.461	3.0549	3.0745	3.3761	3.2288
ZDHHC16	0.46545	4.4663	6.0152	4.6015e-06	4.6903e-05	3.7641	4.185	4.2101	4.5391	4.537	4.6678	4.6589
CREB1	-0.32182	6.1286	-6.0144	4.6097e-06	4.696e-05	3.4207	6.3197	6.2846	6.0801	6.1271	5.9723	5.9875
AGPAT3	0.29413	7.2116	6.0129	4.6268e-06	4.7109e-05	3.3025	7.0195	7.0967	7.2039	7.2427	7.3771	7.3293
NCLN	0.30315	6.9543	6.0123	4.6325e-06	4.7141e-05	3.3266	6.8085	6.808	6.968	6.9144	7.1548	7.072
BSPRY	-0.51793	3.9136	-6.0105	4.6521e-06	4.7315e-05	3.8316	4.1692	4.2321	3.887	3.8361	3.6504	3.7064
WDR43	0.29235	7.3367	6.0082	4.6772e-06	4.7544e-05	3.2797	7.1311	7.2253	7.3362	7.3874	7.4666	7.4739
CTNNAL1	-0.37503	5.4151	-6.0064	4.697e-06	4.7701e-05	3.5091	5.6151	5.6392	5.3261	5.4141	5.2025	5.2935
SFXN2	0.51994	4.3226	6.0063	4.6977e-06	4.7701e-05	3.7811	4.0255	4.0173	4.4925	4.3276	4.4937	4.5793
FAM32A	0.33935	6.5129	6.0056	4.7057e-06	4.7751e-05	3.3668	6.2387	6.3904	6.5457	6.5984	6.6241	6.6799
MIEF1	0.31608	6.3072	6.0054	4.7078e-06	4.7751e-05	3.3883	6.1455	6.1565	6.3019	6.3025	6.49	6.4465
AGPAT2	0.66739	3.3712	6.0037	4.7272e-06	4.7922e-05	4.0088	3.006	2.9449	3.4457	3.5363	3.6746	3.6197
RNF219	0.36816	5.5947	6.0008	4.7595e-06	4.8223e-05	3.4934	5.3407	5.4239	5.6417	5.6663	5.7148	5.7807
TMEM246	0.39688	5.1222	5.9982	4.7883e-06	4.8489e-05	3.5793	4.857	4.9092	5.2109	5.1935	5.298	5.2645
LCP2	0.62542	3.6105	5.9971	4.8007e-06	4.8588e-05	3.9525	3.1676	3.17	3.8299	3.9098	3.7842	3.8018
POLR1A	0.2841	7.1746	5.9962	4.8102e-06	4.8658e-05	3.2667	7.0013	7.0484	7.1914	7.1893	7.303	7.3142
PPP2R5A	0.38455	5.5697	5.9923	4.855e-06	4.9085e-05	3.4775	5.3673	5.3352	5.5461	5.6955	5.7544	5.72
FZD4	0.32315	6.3854	5.9904	4.8765e-06	4.9274e-05	3.3437	6.2538	6.1809	6.3779	6.4216	6.5091	6.569
ZNF557	0.38551	5.292	5.9885	4.8979e-06	4.9464e-05	3.5201	5.0882	5.0557	5.3825	5.3137	5.4343	5.4774
GTF3C4	0.35177	5.8182	5.9878	4.9061e-06	4.952e-05	3.4232	5.6452	5.5986	5.8126	5.9045	5.979	5.9693
PSMB2	0.34409	6.3336	5.9875	4.9098e-06	4.9531e-05	3.3456	6.0717	6.2137	6.3265	6.4171	6.4845	6.488
MLXIP	-0.34949	6.5574	-5.9842	4.9478e-06	4.9887e-05	3.2905	6.7833	6.7832	6.5311	6.3722	6.5028	6.3721
CEP57L1	-0.3433	6.0775	-5.9827	4.9648e-06	5.0015e-05	3.3492	6.2709	6.2981	5.972	6.0496	5.8779	5.9964
ODF2L	0.50247	4.3169	5.9826	4.9659e-06	5.0015e-05	3.7294	4.084	3.9277	4.4471	4.4215	4.5239	4.4974
WDR44	0.41296	5.006	5.9791	5.0069e-06	5.0402e-05	3.5572	4.7269	4.8061	5.1014	5.048	5.1528	5.201
NMB	1.255	1.7835	5.9784	5.0157e-06	5.0463e-05	4.2173	1.2146	0.78822	2.2323	1.9462	2.267	2.2529
IL10RB	0.49244	4.3456	5.9775	5.0258e-06	5.0537e-05	3.7092	4.0042	4.0845	4.4579	4.4628	4.4937	4.5703
RP3-467D16.3	-3.4262	-1.6062	-5.9768	5.0337e-06	5.0589e-05	2.8713	0.27497	0.35611	-1.9064	-1.9452	-3.9149	-2.502
CHCHD10	0.46614	4.7659	5.9762	5.0414e-06	5.0639e-05	3.6011	4.4357	4.5871	4.7319	4.8831	4.9998	4.9579
MTMR14	0.36532	5.4444	5.9712	5.1008e-06	5.1208e-05	3.4487	5.2307	5.2484	5.4799	5.4954	5.6231	5.5891
LAGE3	-0.34709	5.5424	-5.9687	5.1305e-06	5.1478e-05	3.3954	5.7647	5.7479	5.4396	5.4841	5.4066	5.4115
TBC1D32	-0.49633	4.4071	-5.9668	5.153e-06	5.1676e-05	3.6137	4.8026	4.5699	4.3974	4.2989	4.1544	4.2195
ELK3	1.978	0.70449	5.9651	5.1742e-06	5.1862e-05	3.9862	-0.29821	-0.86628	1.2635	1.3593	1.2946	1.4741
PSMA3	0.32381	6.4197	5.9648	5.1777e-06	5.1869e-05	3.282	6.2341	6.2137	6.4433	6.5346	6.5187	6.5738
LPCAT2	1.4916	1.4755	5.964	5.1869e-06	5.1933e-05	4.1847	0.3666	0.75387	1.794	1.9068	1.813	2.2187
BTBD9	1.5127	1.3134	5.9632	5.1973e-06	5.201e-05	4.1637	0.22688	0.35611	1.9088	1.8246	1.6519	1.9119
RP11-685M7.3	-1.3168	1.1054	-5.9623	5.2084e-06	5.2093e-05	4.1848	1.8281	1.6172	1.0796	1.2375	0.60868	0.26131
ZNF579	1.1317	1.9868	5.9592	5.2453e-06	5.2433e-05	4.1526	1.6016	1.147	2.181	1.954	2.5802	2.4571
PLEKHA4	-0.55422	3.7228	-5.9588	5.2504e-06	5.2456e-05	3.752	4.124	3.9506	3.6292	3.6648	3.486	3.4825
LRRC6	0.97754	2.157	5.9585	5.2546e-06	5.247e-05	4.1287	1.6016	1.655	2.2449	2.2279	2.6118	2.601
CCNE2	-0.35013	5.8353	-5.9568	5.2759e-06	5.2655e-05	3.3267	6.0153	6.0123	5.8105	5.8557	5.5988	5.7195
TCF4	0.35985	5.8713	5.9548	5.3008e-06	5.2871e-05	3.342	5.678	5.5962	5.9701	5.9961	5.9403	6.0471
2019-03-06	-0.30106	7.3675	-5.9546	5.3033e-06	5.2871e-05	3.141	7.6126	7.4701	7.3377	7.3049	7.2256	7.2542
HGSNAT	0.67285	3.5028	5.9478	5.3874e-06	5.3637e-05	3.8559	3.0342	3.1102	3.779	3.5896	3.8035	3.7003
NONO	0.26682	8.423	5.9478	5.3874e-06	5.3637e-05	3.0417	8.2437	8.2931	8.4251	8.5075	8.5092	8.5591
FAM178B	-0.35102	6.1119	-5.9477	5.3888e-06	5.3637e-05	3.2678	6.2417	6.3062	6.0687	6.2136	5.8883	5.9529
EHD1	-0.40774	5.3244	-5.9444	5.4305e-06	5.4024e-05	3.3695	5.6279	5.5631	5.3008	5.0767	5.2015	5.1767
SYDE2	-0.62107	3.5959	-5.9427	5.4533e-06	5.4222e-05	3.7363	4.0874	3.8647	3.5904	3.3313	3.3159	3.3858
API5	0.29236	7.3785	5.9423	5.4576e-06	5.4236e-05	3.1194	7.1868	7.2424	7.372	7.4586	7.4786	7.5327
NFATC3	0.28313	7.2617	5.9403	5.4833e-06	5.4462e-05	3.1252	7.136	7.083	7.2614	7.3032	7.406	7.3806
RP11-452L6.5	-0.56168	4.166	-5.9389	5.5011e-06	5.461e-05	3.6058	4.5862	4.3287	4.262	4.021	3.9142	3.884
PPP1R26-AS1	1.3611	1.3021	5.9377	5.5174e-06	5.4734e-05	4.1269	0.45276	0.71868	1.312	1.4608	1.8665	2.0016
DYRK3	-0.32443	5.9632	-5.9375	5.5203e-06	5.4734e-05	3.2603	6.1301	6.1499	5.9328	5.9386	5.7901	5.8376
GTF2H1	0.31958	6.5041	5.9373	5.5224e-06	5.4734e-05	3.2048	6.2886	6.3457	6.5368	6.5851	6.5927	6.676
CTD-2267D19.3	1.3596	1.5545	5.9358	5.5421e-06	5.49e-05	4.1255	0.41033	0.97874	1.94	1.9227	1.9579	2.1174
KIFC3	1.111	1.9819	5.9345	5.5592e-06	5.504e-05	4.1029	1.1897	1.4123	2.1413	2.3027	2.4945	2.3507
SDF2L1	0.63547	3.5479	5.93	5.6175e-06	5.5588e-05	3.7889	3.2897	3.0965	3.5656	3.6812	3.8089	3.8453
PTPRH	-0.46091	4.4837	-5.9293	5.6266e-06	5.5649e-05	3.5009	4.7715	4.7786	4.4334	4.2759	4.3807	4.262
AKAP12	1.2353	1.6662	5.9289	5.632e-06	5.5673e-05	4.1091	0.71928	1.1203	1.9706	1.8745	2.1768	2.1358
DDN	-0.39815	5.2921	-5.9265	5.6646e-06	5.5948e-05	3.3381	5.501	5.5531	5.1236	5.3152	5.1409	5.1185
NCOA5	0.45165	5.0755	5.9264	5.6659e-06	5.5948e-05	3.4127	4.8391	4.8637	4.9696	5.1845	5.2425	5.3537
TTC28	1.0607	1.9985	5.924	5.6971e-06	5.6227e-05	4.0638	1.4838	1.4769	2.1005	1.8246	2.6243	2.4813
HBS1L	0.2475	8.683	5.9231	5.709e-06	5.6314e-05	2.9631	8.5048	8.5485	8.7491	8.7489	8.7552	8.7916
CCDC130	-0.47113	5.3973	-5.9223	5.7203e-06	5.6396e-05	3.3073	5.7089	5.6439	5.4852	5.1299	5.2364	5.1797
SETD7	0.42645	4.9439	5.9209	5.7392e-06	5.6552e-05	3.4308	4.7138	4.6974	4.9236	5.0678	5.1136	5.1475
ARHGAP1	0.51769	4.2431	5.9148	5.8223e-06	5.734e-05	3.5901	3.8969	3.9277	4.4659	4.3065	4.4383	4.4231
GAS8	0.73986	3.3061	5.9126	5.8516e-06	5.7598e-05	3.819	3.0131	2.6962	3.5403	3.4151	3.5131	3.6584
LMBRD1	0.37402	5.5447	5.9115	5.8666e-06	5.7716e-05	3.2926	5.2579	5.3753	5.6202	5.64	5.6508	5.724
EOGT	0.51379	4.3183	5.9106	5.8788e-06	5.7806e-05	3.5502	3.9718	4.1152	4.3105	4.413	4.4903	4.6093
HCLS1	1.9285	0.64363	5.9081	5.9148e-06	5.8129e-05	3.88	-0.2295	-0.86628	1.0514	1.1456	1.3556	1.4049
COPRS	0.52973	4.0742	5.9068	5.932e-06	5.8267e-05	3.6053	3.6819	3.8525	4.1729	4.1465	4.2936	4.2979
CSAD	-0.68401	3.2755	-5.906	5.943e-06	5.8344e-05	3.7387	3.6907	3.581	3.4016	3.0992	2.8639	3.0166
CHST3	1.2611	1.546	5.9056	5.9489e-06	5.8372e-05	4.0551	1.0857	0.85457	1.2386	1.5958	2.3594	2.1419
HDAC7	0.30279	7.6659	5.9036	5.9768e-06	5.8615e-05	3.0011	7.5027	7.4727	7.777	7.657	7.8456	7.7401
SFXN1	0.29795	6.6191	5.901	6.0133e-06	5.8942e-05	3.1045	6.4214	6.4513	6.6892	6.6852	6.723	6.7443
RNF187	-0.28883	7.0875	-5.9001	6.0265e-06	5.904e-05	3.0392	7.2198	7.2636	7.0282	7.1065	6.9655	6.9413
AIP	0.44847	4.7818	5.899	6.0422e-06	5.9163e-05	3.4112	4.5328	4.56	4.8184	4.7756	5.0778	4.9265
FH	0.34066	6.5234	5.8979	6.0579e-06	5.9285e-05	3.1069	6.2995	6.3813	6.467	6.6315	6.6755	6.6856
PKD1	-0.44459	7.4766	-5.8964	6.079e-06	5.946e-05	2.9907	7.7878	7.6756	7.5911	7.2242	7.356	7.2248
AC006116.22	-1.4626	0.48127	-5.8959	6.0865e-06	5.9503e-05	4.0175	1.3777	1.3901	0.27579	0.040283	-0.21444	0.018267
FRMD8	0.36833	5.348	5.8938	6.1163e-06	5.9763e-05	3.2755	5.162	5.1966	5.3113	5.3189	5.5782	5.5213
CPQ	-0.34785	5.7437	-5.8933	6.1241e-06	5.9779e-05	3.185	5.9768	5.9204	5.7402	5.6225	5.6044	5.598
DIP2A	-0.41372	6.6513	-5.8931	6.1267e-06	5.9779e-05	3.063	6.972	6.8411	6.7103	6.3966	6.5095	6.4785
RP11-437B10.1	-0.3571	6.0134	-5.893	6.1275e-06	5.9779e-05	3.1454	6.2605	6.1737	6.0491	5.8773	5.8563	5.8636
ZNF440	0.7469	3.0717	5.8925	6.1348e-06	5.9818e-05	3.8121	2.7747	2.5538	3.0831	3.2102	3.35	3.4583
ABHD17A	0.37109	6.2964	5.8893	6.182e-06	6.0247e-05	3.1187	6.1648	6.0023	6.4179	6.2776	6.5044	6.4111
WDR3	0.32227	6.3166	5.8883	6.1957e-06	6.0349e-05	3.1107	6.1203	6.1614	6.3049	6.3902	6.4363	6.4868
PWP1	0.37504	5.8528	5.8838	6.2621e-06	6.0952e-05	3.1668	5.6267	5.7159	5.7622	5.9244	6.0061	6.0812
SSU72	0.31742	6.1574	5.8836	6.2642e-06	6.0952e-05	3.1209	5.9849	5.994	6.1993	6.1518	6.3137	6.3008
ZFAND5	-0.32161	6.2905	-5.8827	6.2785e-06	6.106e-05	3.0849	6.4648	6.4779	6.2049	6.2911	6.1939	6.1106
EPG5	-0.33484	7.2709	-5.8811	6.3011e-06	6.1248e-05	2.9735	7.5487	7.3986	7.2851	7.1143	7.143	7.1355
CATSPERG	-1.076	1.5189	-5.871	6.4538e-06	6.2699e-05	3.9597	2.0924	2.0862	1.4044	1.4716	1.1295	0.92956
RUVBL2	0.25135	8.8137	5.8704	6.462e-06	6.2719e-05	2.8253	8.6382	8.7208	8.8142	8.8489	8.9124	8.9478
HYOU1	0.29701	7.1867	5.8704	6.4626e-06	6.2719e-05	2.9673	6.9619	7.0647	7.1971	7.2766	7.3102	7.31
MICALCL	-1.5919	0.30906	-5.87	6.4689e-06	6.2748e-05	3.9356	1.31	1.1732	-0.18059	0.28129	-0.45545	-0.27418
TP53BP1	0.33213	5.9381	5.8687	6.4889e-06	6.2886e-05	3.1211	5.7056	5.7824	5.9917	5.998	6.0667	6.084
HIST1H2BF	-0.28457	7.4952	-5.8686	6.4899e-06	6.2886e-05	2.924	7.7167	7.6114	7.4298	7.4563	7.3508	7.4059
EEF2K	-0.29365	6.8655	-5.867	6.5138e-06	6.3085e-05	2.9789	7.0129	7.1057	6.7701	6.7719	6.7836	6.7491
CAND1	0.29585	7.4385	5.8667	6.5192e-06	6.3104e-05	2.9325	7.3026	7.2586	7.4105	7.5104	7.5311	7.6181
S100A6	0.22853	10.453	5.8664	6.5236e-06	6.3114e-05	2.7057	10.297	10.374	10.428	10.49	10.573	10.556
RP11-16N11.2	-1.1379	1.4501	-5.866	6.5299e-06	6.3143e-05	3.9594	1.9367	2.0442	1.553	1.5037	0.7057	0.95744
C12orf49	0.48187	4.49	5.8595	6.6309e-06	6.4086e-05	3.3936	4.1596	4.2446	4.5263	4.6523	4.6328	4.7243
PARL	0.49325	4.5171	5.8589	6.639e-06	6.4131e-05	3.3835	4.2999	4.1716	4.4872	4.6841	4.7326	4.7273
ATP6V0A1	-0.34864	6.2541	-5.8575	6.6617e-06	6.4317e-05	3.0271	6.4518	6.4792	6.2792	6.0805	6.1194	6.1145
ACAT1	-0.27327	7.321	-5.8541	6.7157e-06	6.4805e-05	2.9059	7.4766	7.4783	7.2595	7.3051	7.1843	7.2223
HIST1H3F	-0.24654	8.4055	-5.848	6.8126e-06	6.5706e-05	2.8011	8.4983	8.5358	8.4239	8.4351	8.2609	8.2793
ACBD4	-0.73243	2.8223	-5.8466	6.8342e-06	6.588e-05	3.6893	3.1991	3.3066	2.8236	2.5479	2.5802	2.4765
ADAMTS3	0.42225	4.9929	5.843	6.8928e-06	6.6411e-05	3.2401	4.7051	4.7615	5.1655	5.0178	5.1366	5.1708
IKBIP	0.43564	4.8347	5.8416	6.9159e-06	6.6599e-05	3.2698	4.6075	4.5425	4.8536	4.9879	4.9805	5.0359
RP1-29C18.8	-1.127	1.6304	-5.8409	6.9267e-06	6.6669e-05	3.8787	2.0924	2.3845	1.5327	1.4716	1.3998	0.90113
UTP14A	0.37741	5.5544	5.8382	6.9708e-06	6.7059e-05	3.1114	5.3294	5.3739	5.5101	5.6592	5.7002	5.7537
STMN3	1.1292	1.7424	5.836	7.0069e-06	6.7339e-05	3.8867	1.2391	1.1732	1.5121	1.858	2.3368	2.3349
DNAJC3	0.35479	5.7247	5.836	7.0072e-06	6.7339e-05	3.0794	5.4716	5.5556	5.7512	5.8364	5.8443	5.8887
PIK3AP1	0.3486	5.9714	5.8358	7.0115e-06	6.7346e-05	3.032	5.8103	5.8077	5.8845	6.0152	6.1166	6.1939
IGFBP7	2.0677	0.66654	5.8354	7.0172e-06	6.7366e-05	3.7383	0.016661	-1.0976	0.963	1.1044	1.3406	1.6721
CSNK1E	0.32889	6.1288	5.833	7.0572e-06	6.7715e-05	3.0045	5.9502	5.9567	6.165	6.1301	6.3352	6.2354
ZNF121	0.25643	8.002	5.8317	7.0794e-06	6.7893e-05	2.7976	7.8494	7.883	8.0176	8.0182	8.1017	8.1418
IARS2	0.29676	6.6418	5.8311	7.0884e-06	6.7944e-05	2.9321	6.4911	6.4732	6.6378	6.6921	6.7627	6.7937
RARS	0.33182	6.8386	5.829	7.1249e-06	6.8259e-05	2.9068	6.6345	6.65	6.8054	6.9946	6.963	6.9841
VAPA	0.2733	7.7653	5.8263	7.169e-06	6.8647e-05	2.8084	7.5953	7.5811	7.8146	7.8808	7.8241	7.8958
SMARCA2	0.27949	7.1808	5.8243	7.2029e-06	6.8936e-05	2.8605	7.0053	6.9701	7.2702	7.306	7.2486	7.2843
C20orf24	0.92472	2.7209	5.8237	7.214e-06	6.9006e-05	3.7265	2.3499	2.1135	2.7285	2.7619	3.365	3.0066
KIAA0930	-0.29426	6.5393	-5.8232	7.2231e-06	6.9058e-05	2.9096	6.7086	6.759	6.4623	6.4269	6.4398	6.4391
SPESP1	-0.36502	5.358	-5.8227	7.2312e-06	6.9098e-05	3.088	5.5616	5.4997	5.3854	5.3778	5.1158	5.2075
RNF126	0.34075	5.7875	5.8225	7.2347e-06	6.9098e-05	3.0307	5.6057	5.6262	5.8231	5.7533	5.9863	5.9307
IARS	-0.22765	9.5515	-5.8216	7.2502e-06	6.9183e-05	2.6518	9.6715	9.6859	9.513	9.5378	9.4252	9.4752
RCC1L	0.46909	4.3483	5.8215	7.251e-06	6.9183e-05	3.3297	4.1272	4.053	4.4141	4.3731	4.5762	4.5464
A4GALT	-0.37359	5.7655	-5.8208	7.2631e-06	6.9263e-05	3.0119	5.8993	6.0159	5.7313	5.7666	5.6742	5.506
HIC2	-0.46183	4.1949	-5.8202	7.2734e-06	6.9326e-05	3.3158	4.4799	4.4219	4.1228	4.1616	4.0076	3.9754
ZNF330	0.36821	5.5214	5.8188	7.2985e-06	6.9499e-05	3.073	5.2845	5.3294	5.5687	5.5874	5.7351	5.6232
PHLDA2	-0.81198	3.0224	-5.8187	7.299e-06	6.9499e-05	3.5845	3.5365	3.3929	3.2229	2.6565	2.7203	2.6054
AKR1E2	-0.57224	3.68	-5.8184	7.3044e-06	6.9515e-05	3.4365	4.084	3.8647	3.7038	3.6094	3.4479	3.3703
C11orf21	-0.36335	6.0518	-5.8174	7.3221e-06	6.9648e-05	2.9598	6.3161	6.1922	6.0678	5.9435	5.9601	5.831
NEAT1	-0.45929	9.7427	-5.8167	7.3332e-06	6.9718e-05	2.6242	10.209	9.8491	9.7757	9.4798	9.591	9.5512
[truncated: 16,691 more rows]

## Sheet: DEGs at D0
Supplemental Table 2: RNA transcriptome and ATAC-seq analysis of wild type and KMT2D-sgRNA2 mediated knockout (KMT2D KO) HUDEP-2 cells.
[truncated: 367 more rows]

[truncated: 7 more sheets: DEGs at D3, D3vsD0, erythroid genes, ATAC_down_region, ATAC_up_region, ATAC_nochange_region, ATAC_motif]
