# Supplementary material for: The H3K4 methyltransferase KMT2D is an essential cofactor for GATA1 at erythroid gene enhancers
Source: Research Square preprint supplement (doi:10.21203/rs.3.rs-7853319/v1), 2025-10-22
Supplement: Supplementary file 3 [file 5e1949e89f36216a38d9f01b.xlsx]

## Sheet: qPCR
Item	sequence
H-Q-HBA1/2-F	GACCTGCACGCGCACAAGCTT
H-Q-HBA1/2-R	GCTCACAGAAGCCAGGAACTTG
H-Q-HBB-F	GCACGTGGATCCTGAGAACT
H-Q-HBB-R	CACTGGTGGGGTGAATTCTT
H-Q-HBG1/2-F	AGCACCTGGATGATCTCAAG
Supplemental Table 10: Oligonucleotides, DNA primers, and antibodies used in this study. Oligonucleotides were used for sgRNA vector construction; DNA primers were used for the analysis of Cas9-mediated indels by Sanger sequencing; antibodies were used for Western blotting, immunoprecipitation.
H-Q-HBG1/2-R	AAACGGTCACCAGCACATTT
H-Q-HBZ-F	AGCGAGCTGCACGCCTACATC
H-Q-HBZ-R	ACGACCGATAGGAACTTGTCCC
H-Q-GYPA-F	ATATGCAGCCACTCCTAGAGCTC
H-Q-GYPA-R	CTGGTTCAGAGAAATGATGGGCA
H-Q-SLC25A37-F	CCACATGACAGCAGGAGCGATG
H-Q-SLC25A37-R	CTTGTGTACTGGGCTTTGGGATC
H-Q-SLC22A4-F	TGGACCTGTTCAGGACTCGGAA
H-Q-SLC22A4-R	TAGGAGCATCCAGAGACAGAGC
H-Q-BAND3-F(SLC4A1)	CTGCTGGTGTTTGAGGAAGCCT
H-Q-BAND3-R(SLC4A1)	CACCAGCAGGATGAGCCAGAAG
H-Q-AMHR2-F	GCCTGGCATTTCTCCATGAGGA
H-Q-AMHR2-R	CAGGTCTCCAATGGCACACGAT
H-Q-EPOR-F	TTCTGTGCTTCACCGAGCGGTT
H-Q-EPOR-R	CGACACAGCTTCCATGGCTCAT
H-Q-KMT2D-F	GGAATGGGTAGCTCTTTGGCGA
H-Q-KMT2D-R	TGCCGAATCAGCAGCTCTCGTA
H-Q-ACTB-F	CATGTACGTTGCTATCCAGGC
H-Q-ACTB-R	CTCCTTAATGTCACGCACGAT
Cut&Run
EPOR-1F	ACGGTTGGCGCTATCGGTTG
EPOR-1R	TTCAAGACCTCGAGCTCGGGAC
EPOR-2F	AAACGTGTGTCTGAAGCCAGAAC
EPOR-2R	AGCACTCAGCCTGGGTAGAGATAAG
FOG1-1F	TTCCTGTGCTGTGTGCATCCTCAG
FOG1-1R	ATAGCTCAGCCTGTGTGGGTCTG
FOG1-2F	CCGAGCTCCATCTGACTAATCTCG
FOG1-2R	CCCATCTCCCTGCTGTCCATCAG
SLC4A1-1F	GTTGTCCCTGTCATCTGGTCAATCC
SLC4A1-1R	AGTTTTGGAAGTGCACCAAACACC
SLC4A1-2F	GCAAGATGGGTTAATGTTGGCCC
SLC4A1-2R	GGTTGGGTGGGGAGTAGAGACTG
SLC4A1-3F	ACTGGCTGAGATAGGCCACC
SLC4A1-3R	CCTGGCTAGCTAGTCTTCCTCC

## Sheet: AID_Gibson_primer
Supplemental Table 10: Oligonucleotides, DNA primers, and antibodies used in this study. Oligonucleotides were used for sgRNA vector construction; DNA primers were used for the analysis of Cas9-mediated indels by Sanger sequencing; antibodies were used for Western blotting, immunoprecipitation.
Item	sequence	company
K2D-Gibson-5HA-F	TCCCTCTCTCCGACTGGGCAGTCCACTTCTGTTAACTACTAGGGAT	GENEWIZ
K2D-Gibson-3HA-R	TCCCTCTCTCCGACTGGGCAACTCACCTCCAGGTTCTCCT	GENEWIZ
Backbone-KMT2D-F	TGCCCAGTCGGAGAGAGGGATGGCGTCGACCGATGCCCTTGAG	GENEWIZ
Backbone-KMT2D-R	TGCCCAGTCGGAGAGAGGGATGGGCTCCAAGTACCTCCCGTACC	GENEWIZ
K2D-3HA-linea-F	TCATCTCAGAAGAGGATCTGGACAGCCAGAAGCTGGCTGGTG	GENEWIZ
K2D-5HA-linea-R	CTCTCTCCGACTGGGCAGGGC	GENEWIZ
K2D-Gibson-AID-F	CCCTGCCCAGTCGGAGAGAGATGGTGAGCAAGGGCGAG	GENEWIZ
K2D-Gibson-AID-R	CAGATCCTCTTCTGAGATGAGTTTTTGTTCTTTATACATCCTCAAATCGATTTTCCTCAAG	GENEWIZ

## Sheet: IDT_primer
Supplemental Table 10: Oligonucleotides, DNA primers, and antibodies used in this study. Oligonucleotides were used for sgRNA vector construction; DNA primers were used for the analysis of Cas9-mediated indels by Sanger sequencing; antibodies were used for Western blotting, immunoprecipitation.
Item	sequence	company
KMT2D-sg1	CCTTCGAAGCGAAAGTACTG	IDT
KMT2D-sg2	GGTGGAAATTCCCGCCAACG	IDT
KMT2D-AID-sg8	TGCCCAGTCGGAGAGAGGGA	IDT
Ctrl-sg1	GTAGGCGCGCCGCTCTCTAC	IDT

## Sheet: indel primer
Supplemental Table 10: Oligonucleotides, DNA primers, and antibodies used in this study. Oligonucleotides were used for sgRNA vector construction; DNA primers were used for the analysis of Cas9-mediated indels by Sanger sequencing; antibodies were used for Western blotting, immunoprecipitation.
Item	sequence	company
KMT2D-sg1-F	GCTCCCTAAGATTCCCCAAG	GENEWIZ
KMT2D-sg1-R	TCTGAATCTCCCTGGGTCAC	GENEWIZ
KMT2D-sg2-F	CTGTGGGGGAAGACCTGATA	GENEWIZ
KMT2D-sg2-R	TATCAGCGAGCACCCTATCC	GENEWIZ

## Sheet: shRNA
Supplemental Table 10: Oligonucleotides, DNA primers, and antibodies used in this study. Oligonucleotides were used for sgRNA vector construction; DNA primers were used for the analysis of Cas9-mediated indels by Sanger sequencing; antibodies were used for Western blotting, immunoprecipitation.
Item	shRNA Sequence	Position	label
Luciferase	CCTAAGGTTAAGTCGCCCTCG
KMT2D_1	CGAATGGAAGAACAACGTGTA	Position 15354 (CDS)	TRCN0000013142
KMT2D_2	CACCCACACCTACCTCATTTA	3UTR	TRCN0000239232

## Sheet: Antibody
Supplemental Table 10: Oligonucleotides, DNA primers, and antibodies used in this study. Oligonucleotides were used for sgRNA vector construction; DNA primers were used for the analysis of Cas9-mediated indels by Sanger sequencing; antibodies were used for Western blotting, immunoprecipitation.
Item	company	Catalog
KMT2D	Merck(Sigma)	ABE1867
KDM6A	Cell Signaling Technology	D3Q1I
ACTIN	proteintech	66009-1
GATA1	abcam	ab11852
H3	abclonl	A2348
IgG	Abclonl	AC005
Secondary antibody	Beyotime Biotechnology	A0208
Secondary antibody	Beyotime Biotechnology	A0216

## Sheet: drug
Supplemental Table 10: Oligonucleotides, DNA primers, and antibodies used in this study. Oligonucleotides were used for sgRNA vector construction; DNA primers were used for the analysis of Cas9-mediated indels by Sanger sequencing; antibodies were used for Western blotting, immunoprecipitation.
Item	company	Catalog
DMSO	Solarbio	D8371
5-Ph-IAA	MCE(MedChemExpress)	HY-134653
DTAG13	Selleck	S9813
Cas9 protein	IDT	1081058
