# Supplementary material for: The H3K4 methyltransferase KMT2D is an essential cofactor for GATA1 at erythroid gene enhancers
Source: Research Square preprint supplement (doi:10.21203/rs.3.rs-7853319/v1), 2025-10-22
Supplement: Supplementary file 4 [file 64bd54333f3a85e6f708288b.xlsx]

## Sheet: K562_6h_CHEA
Supplemental Table 7: Transcription factors occupancy analysis for the de-regulated genes in AID-KMT2D K562 and HUDEP-2 cells with time serial analysis.
Term	Overlap	P-value	Adjusted P-value	Old P-value	Old Adjusted P-value	Odds Ratio	Combined Score	Genes
GATA1 CHEA	20/807	0.000387968	0.0277766	0	0	2.51496	19.7539	RYR1;SLC6A19;AMHR2;KCNE3;FAXDC2;RAB3D;PLEKHA6;ICAM5;FOS;TRERF1;EPOR;ZFYVE28;CCDC88B;KRT19;ASIC4;FAM212A;GRK5;KIAA1522;KCNN4;ZFPM1
GATA2 CHEA	19/772	0.000590992	0.0277766	0	0	2.48859	18.4995	CRB2;DHH;ICAM5;FOS;FAM214B;TLE6;ARHGAP23;HDAC7;DNAJB2;ASIC4;PPFIBP2;OBSCN;LPAR5;NT5DC4;UBXN10;KIAA1522;KCNN4;ZFPM1;FGFR3
FOSL2 ENCODE	8/196	0.00119257	0.0373671	0	0	4.08844	27.522	KRT19;TNFRSF12A;FAM46B;ERBB3;BCL3;PTPRH;BCL9L;HDAC7
SMC3 ENCODE	22/1181	0.0073152	0.158211	0	0	1.86112	9.15264	CRB2;MIDN;DNAJC22;PEAR1;GLI1;FAM214B;LRRC16A;KAZALD1;DNAJB2;EHD2;SOCS3;SERTAD3;MUC1;PPFIBP2;FAM212A;GRK5;ERBB3;NOXA1;SNAI1;DACT3;ARHGEF40;CCR10
ZBTB7A ENCODE	35/2184	0.00841547	0.158211	0	0	1.62305	7.75443	CSRNP1;NOTCH3;MIDN;RAB3D;DNAJC22;GLI1;GRK5;ERBB3;RAB26;KIAA1522;MIR22HG;ARHGEF40;TRPM4;BCL9L;TNFRSF12A;CBX4;SNAI3;OSGIN1;KLHDC8B;KAZALD1;TLE6;EPOR;NFATC4;SPSB1;MMP15;CDK3;ID1;BCL3;NOXA1;FAM131A;SNAI1;ERF;VWA1;ZFPM1;FGFR3
RCOR1 ENCODE	13/702	0.0368908	0.544397	0	0	1.81085	5.97542	CSRNP1;MIDN;CBX4;OSGIN1;KLHDC8B;FOS;DNAJB2;FAM212A;GRK5;BCL3;SNAI1;ERF;CCR10
STAT3 CHEA	5/177	0.0405402	0.544397	0	0	2.75475	8.83023	SOCS3;SPSB1;CBX4;BCL3;FOS
CTCF ENCODE	26/1790	0.0619787	0.72825	0	0	1.42828	3.97199	CRB2;MIDN;MYRF;DNAJC22;PEAR1;GLI1;FAM214B;RASGRP2;LRRC16A;DNAJB2;SOCS3;MUC1;GRK5;ERBB3;DACT3;ARHGEF40;CCR10;CBX4;SNAI3;KAZALD1;NFATC4;EHD2;PPFIBP2;FAM212A;NOXA1;SNAI1
RAD21 ENCODE	19/1265	0.0793856	0.766608	0	0	1.46499	3.71146	CRB2;BATF2;MYEOV;AQP7;KLHDC8B;PEAR1;GLI1;FAM214B;LRRC16A;KAZALD1;DNAJB2;EHD2;SOCS3;MUC1;PPFIBP2;FAM212A;GRK5;DACT3;ARHGEF40
ESR1 CHEA	4/154	0.081554	0.766608	0	0	2.51769	6.31057	FOS;KIFC3;TRERF1;GPRC5C
RUNX1 CHEA	19/1294	0.0938312	0.80183	0	0	1.42943	3.3824	MIDN;SNAI3;RAB3D;FOS;GLI1;RASGRP2;TRERF1;VAV1;NFATC4;NYNRIN;EHD2;SOCS3;PTP4A3;GRK5;UBXN10;SH3TC1;BCL3;ZFPM1;BCL9L
EZH2 CHEA	5/237	0.108185	0.847451	0	0	2.03607	4.52803	TNXB;KREMEN2;ZFPM1;FGFR3;CCR10
KLF4 CHEA	14/987	0.165009	0.999996	0	0	1.36727	2.46349	MIDN;IFITM2;RAB3D;DNAJC22;FOS;RASGRP2;TLE6;NFATC4;SOCS3;SPSB1;BCL3;NEURL1;SNAI1;FGFR3
TCF3 ENCODE	12/840	0.182375	0.999996	0	0	1.37391	2.33797	HIST2H4A;CSRNP1;MIDN;ERBB3;NHLRC4;NAB2;SNAI1;ERF;MIR22HG;DYRK1B;TRERF1;GPRC5C
SUZ12 CHEA	21/1684	0.248881	0.999996	0	0	1.19832	1.6666	SEMA7A;TNXB;KCNE3;CBX4;UNC5B;DHH;NR2F1;DNAJC22;KREMEN2;PEAR1;KAZALD1;CAMKK1;EPOR;ZFYVE28;MRC2;MMP15;ZNF467;ZFPM1;FGFR3;CCR10;OSBP2
EZH2 ENCODE	5/338	0.28914	0.999996	0	0	1.41119	1.75107	MMP15;CPAMD8;DACT3;EPOR;OSBP2
ZEB1 ENCODE	2/106	0.309949	0.999996	0	0	1.80256	2.11143	TMC4;NFATC4
PPARD CHEA	4/285	0.357508	0.999996	0	0	1.335	1.37318	CLIP2;OSGIN1;LMTK3;ANGPTL4
RFX5 ENCODE	7/559	0.381443	0.999996	0	0	1.18993	1.14684	MIDN;GPR153;FAM46B;MIR22HG;FOSB;DYRK1B;DACT3
EGR1 CHEA	4/315	0.429232	0.999996	0	0	1.20437	1.0186	IFITM2;TNFRSF12A;CBX4;RAB26
SOX2 CHEA	9/775	0.438146	0.999996	0	0	1.10097	0.908521	SOCS3;MUC1;IFITM2;ID1;KIAA1522;NEURL1;CRIP2;FOS;KIFC3
TP53 CHEA	4/319	0.438671	0.999996	0	0	1.18883	0.979602	UNC5B;AXL;DNAJC22;KCNN4
NANOG CHEA	7/595	0.443853	0.999996	0	0	1.11498	0.905658	SOCS3;IFITM2;ID1;SNAI1;PRSS8;KIFC3;TLE6
STAT5A ENCODE	3/233	0.449759	0.999996	0	0	1.22059	0.975308	DNAJB2;SOCS3;MUC1
CEBPB ENCODE	2/144	0.452522	0.999996	0	0	1.31764	1.04478	GPR153;CBX4
HNF4A ENCODE	14/1276	0.486692	0.999996	0	0	1.03797	0.747467	CSRNP1;MIDN;EXOC3L4;PTGDR2;DNAJC22;HFE2;KAZALD1;MMP15;ID1;BCL3;TRNP1;ERF;MIR22HG;BCL9L
TCF3 CHEA	11/1006	0.501904	0.999996	0	0	1.03364	0.712536	CSRNP1;SOCS3;MUC1;IFITM2;UNC5B;ID1;KIAA1522;SNAI1;DAB2IP;KIFC3;AP3B2
BHLHE40 ENCODE	4/348	0.505525	0.999996	0	0	1.08699	0.741495	FAM46B;ICAM5;FAM214B;TLE6
EGR1 ENCODE	6/537	0.505891	0.999996	0	0	1.05628	0.719785	NAB2;FAM131A;SNAI1;ERF;PLEKHA4;TRERF1
BCL3 ENCODE	3/273	0.555119	0.999996	0	0	1.03764	0.610726	FAM131A;DYRK1B;KIFC3

## Sheet: K562_12h_CHEA
Supplemental Table 7: Transcription factors occupancy analysis for the de-regulated genes in AID-KMT2D K562 and HUDEP-2 cells with time serial analysis.
Term	Overlap	P-value	Adjusted P-value	Old P-value	Old Adjusted P-value	Odds Ratio	Combined Score	Genes
GATA1 CHEA	22/807	0.027292	0.999995	0	0	1.61189	5.80469	PNMT;GALNT6;CSF3R;AMHR2;KCNE3;FAXDC2;ATP2A3;PLEKHA6;DAPP1;FOS;FBLN2;CCDC88B;ADAM19;MEX3B;KRT19;COL4A2;TFR2;ADCK1;ZNF846;FYN;KCNN4;PLCB2
GATA2 CHEA	20/772	0.0529908	0.999995	0	0	1.52305	4.47417	PNMT;CRB2;JUP;DYSF;SPATC1L;FOS;FAM214B;FBLN2;TLE6;ARHGAP23;OLFM2;PPFIBP2;OBSCN;NT5DC4;TFR2;ADCK1;IDS;KCNN4;FGFR3;SSBP3
EZH2 ENCODE	10/338	0.0746787	0.999995	0	0	1.7326	4.49534	PNMT;OLFM2;SHC2;EBI3;NMU;APLP1;KIAA1324;DACT3;MYO1F;OSBP2
ZEB1 ENCODE	4/106	0.115498	0.999995	0	0	2.21557	4.78232	JUP;MPZL3;FHIT;NFATC4
ESR1 CHEA	5/154	0.133869	0.999995	0	0	1.8968	3.81427	LRP1;ID3;BMF;FOS;GPRC5C
IRF8 CHEA	4/121	0.162659	0.999995	0	0	1.93004	3.50515	SLFN13;PPFIBP2;DAPP1;CTSS
RUNX1 CHEA	26/1294	0.259606	0.999995	0	0	1.16333	1.56885	GMFG;ITGB2;ATP2A3;GLI1;RASGRP2;NYNRIN;SOCS3;LGALS1;PPP1R13L;FYN;GPSM3;CERS4;DMTN;IL10RA;TMC8;FOS;EMP3;NFATC4;PTP4A3;TFR2;SAPCD1;BCL3;CORO6;ID3;MYO1F;F2RL3
FOSL2 ENCODE	5/196	0.25991	0.999995	0	0	1.47652	1.98948	KRT19;ERBB3;BCL3;KRT8;EMP3
TRIM28 CHEA	5/210	0.307044	0.999995	0	0	1.37469	1.62319	ERBB3;UNC5B;PODXL;BMF;INHA
MYOD1 ENCODE	4/166	0.331192	0.999995	0	0	1.39071	1.53681	SMARCD3;TNNT1;NES;DUSP13
KLF4 CHEA	19/987	0.367609	0.999995	0	0	1.10783	1.10865	CERS4;IFITM2;NXPH4;DNAJC22;ATP2A3;TMC8;APOBR;FOS;NDRG2;RASGRP2;TLE6;NFATC4;SOCS3;CYP2S1;BCL3;ACP5;BMF;FGFR3;FOXA3
EZH2 CHEA	5/237	0.400353	0.999995	0	0	1.21302	1.11041	TNXB;COL4A2;ESRRB;KREMEN2;FGFR3
TP63 CHEA	26/1399	0.404022	0.999995	0	0	1.06822	0.968116	GUCY1B2;EXOC3L2;PFKFB4;TINAGL1;AQP7;ACACB;WDR66;NYNRIN;DMBX1;GPR153;MYBPHL;PPP1R13L;FDXR;SNCG;IKBKE;ST3GAL3;CERS4;DMTN;JUP;KRT8;TMEM173;NFATC4;TRAIP;FCGR2A;COL7A1;LINC00304
SMC3 ENCODE	22/1181	0.412279	0.999995	0	0	1.0701	0.948171	CRB2;DMTN;LRP1;DNAJC22;ATP5I;PEAR1;GLI1;FAM214B;FRS3;KAZALD1;SOCS3;MEX3B;MUC1;PPFIBP2;ERBB3;USH1G;SELM;NOXA1;KIAA1324;DACT3;ARHGEF40;NES
EGR1 CHEA	6/315	0.474673	0.999995	0	0	1.09172	0.813476	IFITM2;JUP;TFR2;RAB26;ATP5I;BMF
TP53 CHEA	6/319	0.486818	0.999995	0	0	1.07755	0.775691	PRRT3;SMARCD3;UNC5B;DNAJC22;KCNN4;GAS6
STAT3 CHEA	3/177	0.601443	0.999995	0	0	0.967703	0.492003	SOCS3;BCL3;FOS
IRF3 ENCODE	11/663	0.614354	0.999995	0	0	0.945482	0.460624	EXOC3L1;LRRC56;JUP;SNORD104;FDXR;MIR22HG;ABCA7;BMF;FYN;MTFR2;TLE6
NFE2L2 CHEA	17/1022	0.620655	0.999995	0	0	0.947111	0.451753	PRRT3;KCNH5;UNC5B;ITGB2;OSGIN1;DAB2IP;DAPP1;SORCS1;ABCB9;ACACB;ARHGAP23;MRC2;SOCS3;GVINP1;PLN;KLHDC8A;FYN
HNF4A ENCODE	21/1276	0.64704	0.999995	0	0	0.935577	0.4073	CERS4;TINAGL1;EXOC3L4;PTGDR2;LAMB2;DNAJC22;ABAT;HFE2;CAPG;KAZALD1;VIL1;USH1G;TFR2;STX16-NPEPL1;BCL3;GMPPA;MST1P2;MIR22HG;LINC00304;SMG7-AS1;INHA
ZC3H11A ENCODE	2/129	0.662801	0.999995	0	0	0.883474	0.363356	MST1R;PEAR1
SPI1 ENCODE	25/1540	0.682398	0.999995	0	0	0.920792	0.351874	C17ORF99;EXOC3L1;ITGAM;ATP2A3;FAM214B;RASGRP2;CTSS;TRIM2;SMG7-AS1;METTL7A;MPZL3;ARHGEF40;IKBKE;SRSF10;GALNT6;NHLRC4;APOBR;ABCA7;KREMEN2;EMP3;TMEM173;CCDC88B;PPFIBP2;ID3;PLCB2
SP1 ENCODE	11/707	0.696822	0.999995	0	0	0.883659	0.3192	JUP;MIR22HG;SNHG9;ABCA7;REEP6;MTFR2;GLI1;FHIT;SSBP3;EXPH5;NFATC4
FOXA1 ENCODE	3/205	0.698975	0.999995	0	0	0.832368	0.298104	KRT8;FOS;EXPH5
RAD21 ENCODE	20/1265	0.713423	0.999995	0	0	0.895947	0.302545	CRB2;DMTN;MYEOV;AQP7;PEAR1;GLI1;FAM214B;FRS3;KAZALD1;SOCS3;MEX3B;MUC1;PPFIBP2;USH1G;SELM;KIAA1324;SMG7-AS1;DACT3;ARHGEF40;NES
ERG CHEA	2/144	0.720605	0.999995	0	0	0.789542	0.258705	GMPPA;MTFR2
NFIC ENCODE	4/279	0.722468	0.999995	0	0	0.814503	0.26478	MIR22HG;BMF;FOS;METTL7A
RELA ENCODE	7/484	0.746199	0.999995	0	0	0.820305	0.240155	C17ORF99;PPFIBP2;EBI3;ITGB2;SMG7-AS1;ATP5I;IKBKE
SPI1 CHEA	16/1056	0.758566	0.999995	0	0	0.857209	0.236869	GMFG;ITGB2;OSGIN1;ATP2A3;DAPP1;APOBR;FOS;KREMEN2;EMP3;PLEKHA4;FRS3;CTSS;SLFN13;ID3;TNNI3;GPSM3
CTCF ENCODE	28/1790	0.761327	0.999995	0	0	0.882791	0.24073	CRB2;MYRF;LRP1;DNAJC22;ATP5I;PEAR1;GLI1;FAM214B;RASGRP2;DUSP13;SOCS3;MUC1;ERBB3;KIAA1324;DACT3;ARHGEF40;NTRK1;DMTN;FRS3;KAZALD1;NFATC4;MEX3B;PPFIBP2;USH1G;SELM;NOXA1;NES;FOXA3

## Sheet: K562_24h_CHEA
Supplemental Table 7: Transcription factors occupancy analysis for the de-regulated genes in AID-KMT2D K562 and HUDEP-2 cells with time serial analysis.
Term	Overlap	P-value	Adjusted P-value	Old P-value	Old Adjusted P-value	Odds Ratio	Combined Score	Genes
GATA2 CHEA	48/772	8.92509e-05	0.0091036	0	0	1.88889	17.6121	PNMT;CRB2;DDR1;COL18A1;SPI1;DHH;DYSF;GATA5;SLC4A1;SPATC1L;FAM214B;FBLN2;RASGRP4;HDAC7;FAM110A;DNAJB2;ASIC4;LASP1;NT5DC4;CREB3L1;KIAA1522;LMNA;CCRL2;SH3BP5;RAC2;IDS;SH3BGRL3;KCNN4;S100A11;JUP;LAPTM5;TLE6;ARHGAP23;OLFM2;GFI1B;OBSCN;LPAR5;UBXN11;RABEP2;TFR2;UBXN10;MIR142;ORAI3;ZFPM1;FGFR3;SSBP3;STX1A;EPHA2
GATA1 CHEA	48/807	0.000251683	0.0128359	0	0	1.79839	14.9039	PNMT;SLC48A1;SLC24A1;COL18A1;SPI1;CSF3R;KCNE3;AMHR2;FAXDC2;ATP2A3;GATA5;SLC4A1;FBLN2;FAM110A;ASIC4;GRK5;SLCO2B1;KIAA1522;ZNF846;CCRL2;RAC2;FYN;KCNN4;GAS2L1;HEXIM2;LAPTM5;SAMD4A;PLEKHA6;SLC39A13;GP1BA;ARID3A;RHOF;EPOR;CCDC88B;ADAM19;MEX3B;KRT19;GFI1B;MEIS1;FAM212A;COL4A2;TFR2;CRISPLD2;C16ORF45;MAFK;PLCB2;ZFPM1;EPHA2
SPI1 CHEA	48/1056	0.0387049	0.999995	0	0	1.33596	4.34427	CD84;STOML1;GMFG;ITGB2;ATP2A3;CTSS;CCDC28B;RASGRP4;POLD4;RINL;DBP;SH3TC1;LMNA;SH3BP5;TBC1D10C;TNNI3;GPSM3;MUTYH;CD53;NDUFA7;GALNT4;GSTO2;LRRC29;LAPTM5;OSGIN1;APOBR;ACYP2;EMP3;KREMEN2;PLEKHA4;PPAPDC2;ARHGAP27;FRS3;VAV1;C12ORF10;RSPH3;NCEH1;LPAR5;DLG4;MIR142;ORAI3;TSSK6;S100A4;DNASE2;PTPRCAP;ARHGEF2;GDPGP1;FERMT3
KLF4 CHEA	45/987	0.0424775	0.999995	0	0	1.33889	4.22927	CDKN1C;IFITM2;STOML1;NOTCH4;TRADD;NXPH4;LHB;DNAJC22;ATP2A3;KRBA1;NDRG2;HOXB13;SOCS3;SCUBE3;LASP1;CSRP1;C7ORF55;SOX15;ZNF428;ZNF503;ZNF524;APOE;LEFTY2;MYBL1;BANP;CERS4;ANXA2;TMC8;ZNF76;APOBR;ARID3A;RHOF;TLE6;ASS1;NFATC4;DDAH2;CYP2S1;ORAI3;BCL3;APOC1;TCEA2;TAGLN2;NPTXR;FGFR3;PLEC
TP53 CHEA	17/319	0.0573327	0.999995	0	0	1.56577	4.47637	PLK3;PRRT3;SMARCD3;UNC5B;LAPTM5;DNAJC22;ESPN;DDB2;COL1A1;LASP1;AXL;DSE;KCNN4;OBSL1;MYBL1;TRIM32;EPHA2
FOSL2 ENCODE	11/196	0.0841241	0.999995	0	0	1.64959	4.0835	ITPKC;KRT19;TNFRSF12A;ERBB3;LMNA;BCL3;KRT8;TAGLN2;EMP3;BCL9L;HDAC7
SMC3 ENCODE	50/1181	0.0938031	0.999995	0	0	1.23573	2.92444	PHLDB1;TESK1;PEAR1;HAPLN2;DACT3;ARHGEF40;SLC39A13;RHOF;PPAPDC2;FRS3;EID2;DDAH2;NHLRC1;KCTD11;PLEC;CRB2;WDR25;H6PD;IDUA;DNAJC22;FAM214B;THBS3;DNAJB2;SOCS3;EFNB1;MUC1;GRK5;ERBB3;RNF215;RILP;CCR10;PLK3;GALNT4;ARID3A;ARHGAP27;KAZALD1;NFKB2;COL1A1;MEX3B;GFI1B;FAM212A;NCEH1;SELM;MIR142;NOXA1;TCEA2;ADCK5;SCN2A;NES;FERMT3
EGR1 CHEA	15/315	0.142128	0.999995	0	0	1.38686	2.7058	TRIM62;IFITM2;SLC26A1;JUP;TNFRSF12A;HSPA1L;CBX4;SLC39A13;PSMB10;RELB;RSPH3;PPP1R3F;TFR2;SMPD1;HSPA1A
RUNX1 CHEA	52/1294	0.165258	0.999995	0	0	1.16675	2.10043	GMFG;ITGB2;ATP2A3;SLC4A1;NYNRIN;LGALS1;RINL;PPP1R13L;BCL7C;SH3BGRL3;GGT1;GPSM3;CERS4;TMC8;GP1BA;EMP3;KCNAB2;VAV1;PTP4A3;TFR2;SAPCD1;PIGL;ARHGEF2;ZFPM1;EMID1;PLEC;STOML1;KRBA1;SOCS3;GRK5;SH3TC1;SH3BP5;FYN;S100A11;BANP;BCL9L;HEXIM2;SNAI3;LAPTM5;ARID3A;ARHGAP27;NFATC4;GFI1B;MC1R;UBXN10;MIR142;BCL3;CORO6;ADCK5;MAFK;TECPR2;MYO1F
ZBTB7A ENCODE	84/2184	0.190864	0.999995	0	0	1.11688	1.84978	PNMT;CSRNP1;WFIKKN1;TESK1;ENO3;RPS6KA4;LASP1;LGALS1;DBP;MDK;MIR22HG;SMG7-AS1;ZNF524;CCDC92;ARHGEF40;SCARF2;TPRN;SNTA1;JMJD4;TNFRSF12A;S100A1;TMC8;SLC39A13;CYBA;RHOF;FRS3;TLE6;ITPKC;DDAH2;ORAI3;VWA1;ARHGEF2;NPTXR;ZNF554;ZFPM1;OBSL1;EPHA2;PLEC;TAGLN;CTF1;RGS19;IDUA;DNAJC22;PROCA1;KRBA1;NDRG2;THBS3;POLD4;GRK5;ERBB3;RNF215;TP53INP2;KIAA1522;EPS8L2;APOE;BANP;BCL9L;MYPOP;GALNT4;JUP;MMAA;TMEM74B;CBX4;SN…
HNF4A ENCODE	50/1276	0.220339	0.999995	0	0	1.13402	1.7153	CSRNP1;TINAGL1;WFIKKN1;EXOC3L4;PTGDR2;ABAT;LASP1;GMPPA;MIR22HG;SMG7-AS1;TPRN;CERS4;IL11RA;HFE2;C12ORF10;ITPKC;MBLAC1;RBP5;SCNN1D;TFR2;MST1P2;OBSL1;SLC26A1;RGS19;DNAJC22;IL20RB;CAPG;LTBP3;C3;POLD4;THPO;EPS8L2;APOE;BCL9L;MYH7B;CACFD1;MAFG-AS1;SAMD4A;ZNF76;KAZALD1;VIL1;GFI1B;TP53I3;FAM195B;BCL3;LINC00304;INHA;ZNF696;GDPGP1;SLC25A5-AS1
MYOD1 ENCODE	8/166	0.226759	0.999995	0	0	1.4006	2.07831	FAM110A;SMARCD3;TNNT1;ELMO3;NES;CLEC2D;DUSP13;SH3BGR
SPI1 ENCODE	59/1540	0.25	0.999995	0	0	1.10745	1.53525	EXOC3L1;CD84;ITGAM;ATP2A3;CTSS;FAM110A;RABGEF1;RINL;ZNF252P-AS1;TBC1D10C;RAC2;SMG7-AS1;SH3BGRL3;SPA17;ARHGEF40;GRASP;CD53;CD52;NHLRC4;SLC39A13;ACYP2;EMP3;KREMEN2;TMEM173;VAV1;C12ORF10;C9ORF9;C7ORF43;ORAI3;TSSK6;DNASE2;ARHGEF2;PLCB2;PPP1R12C;PLEC;C17ORF99;WDR25;RGS19;PROCA1;FAM214B;RASGRP4;POLD4;SH3TC1;ERBB2;S100A11;ANKRD34A;LRRC29;MAFG-AS1;LAPTM5;APOBR;ABCA7;NFKB2;CCDC88B;NCEH1;ATG16L2;UBXN11;MIR…
CTCF ENCODE	68/1790	0.2535	0.999995	0	0	1.09832	1.50732	SLC48A1;PHLDB1;WNT2B;TESK1;PEAR1;ESPN;DUSP13;HAPLN2;PAGR1;BCL7C;DACT3;ARHGEF40;ABCD1;S100A1;SLC39A13;RHOF;PPAPDC2;FRS3;EID2;DDAH2;NHLRC1;KCTD11;ELMO3;PLEC;CRB2;WDR25;TAGLN;H6PD;STOML1;MYRF;IDUA;DNAJC22;FAM214B;THBS3;DNAJB2;SOCS3;EFNB1;MUC1;GRK5;ERBB3;RNF215;GAS2L1;RILP;CCR10;NTRK1;PLK3;GALNT4;MMAA;TMEM74B;CBX4;SNAI3;KAZALD1;NFATC4;NFKB2;COL1A1;SPSB2;MEX3B;GFI1B;FAM212A;MC1R;NCEH1;ATG16L2;SELM;NOX…
ZEB1 ENCODE	5/106	0.313512	0.999995	0	0	1.36755	1.58624	JUP;FLNA;FHIT;TMC4;NFATC4
EZH2 CHEA	10/237	0.318373	0.999995	0	0	1.21771	1.39371	TNXB;COL4A2;THPO;SAMD4A;KREMEN2;HOXB13;SCARF2;ZFPM1;FGFR3;CCR10
BCL3 ENCODE	11/273	0.360049	0.999995	0	0	1.16009	1.18505	IL11RA;ROGDI;DYRK1B;TSSK6;ABCA7;CYBA;ENO3;JMJD8;UFSP1;PSMB10;NFKB2
RCOR1 ENCODE	26/702	0.41162	0.999995	0	0	1.06277	0.943375	CSRNP1;EBI3;RELB;DNAJB2;LGALS1;GRK5;DPF1;CCR10;ZFHX2;CBX4;OSGIN1;ABCA7;KLHDC8B;ARID3A;FRS3;PPP1R3F;MEX3B;GFI1B;FAM212A;RABEP2;BCL3;ADCK5;MAFK;KCTD11;GDPGP1;STX1A
FOXM1 ENCODE	4/95	0.426598	0.999995	0	0	1.21315	1.0335	FAM110A;UBE2C;APOLD1;MXD3
VDR CHEA	3/76	0.499735	0.999995	0	0	1.13365	0.786384	RAC2;ARHGEF2;NFKB2
PPARD CHEA	10/285	0.541982	0.999995	0	0	1.00264	0.614136	SPTBN4;LASP1;TINAGL1;TPI1P2;OSGIN1;LMTK3;SH3BP5;MLYCD;ANGPTL4;DDB2
TP63 CHEA	48/1399	0.57992	0.999995	0	0	0.978089	0.532927	DDR1;EXOC3L2;PFKFB4;TINAGL1;WNT2B;STOML1;EPAS1;AQP10;IL20RB;AQP7;WDR66;NYNRIN;FAM110A;DMBX1;RABGEF1;EFNB1;PPP1R13L;SH3TC1;FDXR;NUDT18;SNCG;LEFTY2;SPACA6P;CERS4;CD52;C17ORF67;JUP;ANXA2;KRT8;TMEM173;ASPRV1;ASS1;NFATC4;C9ORF9;MMP14;GFI1B;MEIS1;FAM212A;FCGR2A;NAGK;PSRC1;SLC7A8;CRISPLD2;COL7A1;SP6;LINC00304;ZFPM1;ZNF696
RAD21 ENCODE	43/1265	0.602812	0.999995	0	0	0.968238	0.490073	CRB2;WDR25;WNT2B;IDUA;AQP7;PEAR1;FAM214B;THBS3;DNAJB2;SOCS3;EFNB1;MUC1;C6ORF1;GRK5;RNF215;MIR3654;SMG7-AS1;DACT3;APOE;ARHGEF40;MYH7B;PLK3;MYEOV;SLC39A13;KLHDC8B;RHOF;FRS3;KAZALD1;NFKB2;COL1A1;EID2;MEX3B;GFI1B;FAM212A;NCEH1;SELM;DDAH2;TCEA2;ADCK5;NHLRC1;SCN2A;NES;PLEC
ZKSCAN1 ENCODE	4/120	0.609219	0.999995	0	0	0.950456	0.471024	ANXA2;ZNF579;ARHGAP27;ASS1
IRF8 CHEA	4/121	0.615761	0.999995	0	0	0.942283	0.45691	CD53;POLD4;CTSS;PSMB10
RELA ENCODE	16/484	0.628423	0.999995	0	0	0.941271	0.43726	C17ORF99;NDUFA7;ITGB2;EBI3;IL2RG;CCDC28B;NFKB2;RELB;FAM110A;DNAJB2;ATG16L2;TMSB4X;MIR142;SMG7-AS1;RAET1K;PTPRCAP
ESR1 CHEA	5/154	0.629919	0.999995	0	0	0.924678	0.427353	C3;C1QTNF6;SH3BP5;GPRC5C;BANP
ZC3H11A ENCODE	4/129	0.665577	0.999995	0	0	0.881609	0.358904	TRIM69;ARID3A;RHOF;PEAR1
STAT5A ENCODE	7/233	0.711172	0.999995	0	0	0.852507	0.290569	DNAJB2;SOCS3;WDR25;MUC1;C7ORF43;MIR142;THAP7-AS1
TRIM28 CHEA	6/210	0.747967	0.999995	0	0	0.80929	0.235014	ERBB3;MMAA;UNC5B;PODXL;INHA;HSPA1A

## Sheet: H2_6h_CHEA
Supplemental Table 7: Transcription factors occupancy analysis for the de-regulated genes in AID-KMT2D K562 and HUDEP-2 cells with time serial analysis.
Term	Overlap	P-value	Adjusted P-value	Old P-value	Old Adjusted P-value	Odds Ratio	Combined Score	Genes
GATA1 CHEA	37/807	2.47456e-09	2.40032e-07	0	0	3.39322	67.2441	SLC22A4;RYR1;ACHE;BTG2;SPI1;AMHR2;HDAC11;SLC2A3;FBLN2;RAP1GAP;AQP1;ZFP36;ASIC4;SH3TC2;ZMIZ1;UCP3;PTK2B;GAS2L1;JUNB;SLC6A19;SMAD3;TNK2;ARID3A;KIAA1161;FOSL2;CCDC88B;EHD1;KBTBD3;MORN1;MEX3B;KIF26A;CDC42EP4;DLC1;SLFN14;CASS4;TMCC2;GPR146
GATA2 CHEA	31/772	9.64195e-07	4.67634e-05	0	0	2.89397	40.0872	DDR1;CRB2;ACHE;BTG2;SPI1;AHNAK;HDAC11;FAM214B;FBLN2;PTGS1;SEPT9;ASIC4;ZMIZ1;IMPA2;CREB3L1;PTK2B;CCR7;JUP;ATP8B2;KIAA1161;ARHGAP23;EHD1;MLXIPL;EFNA3;LPAR5;DLC1;NINJ1;SFXN3;TMCC2;SYNC;FGFR3
RUNX1 CHEA	37/1294	0.00017238	0.00557363	0	0	2.0251	17.5491	GPSM1;BTG2;MIDN;SELPLG;RGS14;PRF1;STMN3;RASGRP2;PPP1R18;NYNRIN;SEPT9;SH3BP1;CASKIN2;KISS1R;SUSD3;MAP3K6;JUNB;ZCCHC24;CDKN2D;SMAD3;DNAH17;GPR56;TNK2;ARID3A;ARID3B;BAIAP2;EHD2;PTP4A3;P2RX1;NINJ1;TREML2;BCL3;ORAI2;CASS4;ARHGEF2;PLEKHO2;PLEC
SMC3 ENCODE	31/1181	0.0023062	0.0559253	0	0	1.82448	11.0786	CRB2;ACHE;SMIM5;MIDN;AHNAK;LTBP2;PEAR1;FAM214B;EFNA4;SERTAD3;SOCS1;ZMIZ1;CASKIN2;C1RL;NPTX1;PDK2;RNF43;CDC42BPG;SLC30A1;ARID3A;RHOC;EHD2;SLC4A8;MEX3B;KIF26A;CDC42EP4;TYRO3;TMCC2;ZMYND10;PVRL2;PLEC
ZC3H11A ENCODE	7/129	0.00367614	0.0713171	0	0	3.76859	21.1263	RNF43;ACHE;SOCS1;CDC42BPG;PTK2B;ARID3A;PEAR1
ZBTB7A ENCODE	48/2184	0.00602286	0.0973696	0	0	1.53535	7.84899	SLC22A4;ACHE;C11ORF95;LAMA5;MIDN;AHNAK;HDAC11;STMN3;RAP1GAP;POLD4;C8G;SOCS1;SH3BP1;ZMIZ1;ADAMTSL4;STX16-NPEPL1;CASKIN2;PALM;KISS1R;MIR22HG;SUSD3;JUNB;SKIL;CDKN2D;TSC22D4;JUP;CDC42BPG;OSGIN1;KLHDC8B;SLC30A1;ARID3A;ZNF34;RHOC;BAIAP2;VASN;KBTBD3;MLXIPL;TSGA10;FNDC4;CDC42EP4;ID1;BCL3;ARHGEF2;AGRN;FGFR3;PVRL2;DBN1;PLEC
KLF4 CHEA	23/987	0.0291976	0.404595	0	0	1.58476	5.60001	SLC22A4;CDKN1C;RARG;GABBR1;MIDN;RIPK3;TMEM63C;APOBR;SLC2A3;ARID3A;RASGRP2;BAIAP2;ARHGAP22;SCUBE3;ZFP36;ZMIZ1;BCL3;SFXN3;IRF6;SGK1;JUNB;FGFR3;PLEC
HNF4A ENCODE	28/1276	0.0338579	0.410527	0	0	1.49413	5.05851	LAMA5;MIDN;CAPG;SAT2;RAP1GAP;SEPT9;POLD4;C8G;SOCS1;IMPA2;STX16-NPEPL1;CASKIN2;KISS1R;MIR22HG;SLC25A42;JUNB;SKIL;PDK2;SLC30A1;KIAA1161;OTOP2;CYP4F12;VASN;MLXIPL;FNDC4;NINJ1;ID1;BCL3
CTCF ENCODE	36/1790	0.0528422	0.549808	0	0	1.36889	4.02513	CRB2;ACHE;LAMA5;SMIM5;MIDN;MYRF;LTBP2;PEAR1;FAM214B;RASGRP2;EFNA4;C8G;SOCS1;CASKIN2;C1RL;MAP3K6;GAS2L1;PDK2;CA13;RNF43;ATP8B2;CDC42BPG;SLC30A1;RHOC;OTOP2;EHD1;EHD2;SLC4A8;MEX3B;KIF26A;CDC42EP4;TYRO3;TMCC2;ZMYND10;PVRL2;PLEC
TP53 CHEA	9/319	0.0566812	0.549808	0	0	1.90132	5.45738	TSGA10;BTG2;COL2A1;GLIPR2;AXL;SLC30A1;SYNC;EFNA4;HES2
EGR1 CHEA	8/315	0.110386	0.885262	0	0	1.70109	3.74883	ZFP36;SMAD3;JUP;RGS14;TNK2;KISS1R;MRGPRE;FOSL2
MYOD1 ENCODE	5/166	0.110687	0.885262	0	0	2.02215	4.45086	RYR1;MOB3C;SMIM5;MRGPRE;SYNC
RCOR1 ENCODE	15/702	0.119758	0.885262	0	0	1.43111	3.03722	RNF43;MIDN;OSGIN1;KLHDC8B;ARID3A;EHD1;ARHGAP22;MOB3C;MEX3B;ZMIZ1;CLCF1;CASKIN2;BCL3;N4BP3;SKIL
HDAC2 ENCODE	5/175	0.130102	0.885262	0	0	1.91422	3.90393	NQO1;MEX3B;ID1;STMN3;SKIL
FOXP2 ENCODE	5/178	0.136896	0.885262	0	0	1.88073	3.7399	CDKN2D;TSC22D4;STX16-NPEPL1;NAB2;JUNB
EZH2 CHEA	6/237	0.155206	0.940936	0	0	1.69083	3.15002	COL2A1;TNXB;PPP1R1B;NPTX1;FGFR3;HES2
FOXA2 ENCODE	7/316	0.209225	0.999996	0	0	1.47371	2.30539	RNF43;SFXN3;TCP11L2;PTPRH;JUNB;CYP4F12;VASN
POU5F1 CHEA	6/261	0.209497	0.999996	0	0	1.52981	2.39116	RARG;ZMIZ1;PTCH1;FOXH1;SGK1;SKIL
RAD21 ENCODE	23/1265	0.219123	0.999996	0	0	1.21178	1.83963	CRB2;ACHE;CA11;RNF43;SMIM5;SH2D3A;KLHDC8B;PEAR1;RHOC;FAM214B;ARHGAP22;EHD2;MEX3B;SOCS1;KIF26A;CASKIN2;C1RL;TYRO3;TMCC2;ZMYND10;PVRL2;PDK2;PLEC
IRF8 CHEA	3/121	0.281056	0.999996	0	0	1.64808	2.09175	EHD1;POLD4;SOCS1
STAT3 CHEA	4/177	0.284911	0.999996	0	0	1.49959	1.88285	ZFP36;SH3BP1;DLC1;BCL3
NANOG CHEA	11/595	0.300203	0.999996	0	0	1.22438	1.47329	FGD4;NQO1;RARG;CDC42EP4;PTCH1;ID1;SLC2A3;ARID3B;SGK1;BAIAP2;FGFR1
EGR1 ENCODE	10/537	0.30487	0.999996	0	0	1.23295	1.46458	MEX3B;C8G;ZMIZ1;DLG4;CDC42BPG;FOXH1;NAB2;PLEKHA4;MAP3K6;SKIL
VDR CHEA	2/76	0.323045	0.999996	0	0	1.75016	1.97761	SFXN3;ARHGEF2
SPI1 CHEA	18/1056	0.347353	0.999996	0	0	1.12729	1.19201	AHNAK;RGS14;OSGIN1;OSM;APOBR;PLEKHA4;PPP1R18;PTGS1;EHD1;POLD4;LPAR5;SH3BP1;DLG4;PTK2B;CCR7;ARHGEF2;JUNB;ZNF385A
FOSL2 ENCODE	4/196	0.350248	0.999996	0	0	1.34988	1.41617	SLC22A4;BCL3;PTPRH;FOSL2
TCF3 CHEA	17/1006	0.366745	0.999996	0	0	1.11645	1.1199	CDKN1C;LAMA5;RARG;PTCH1;TNK2;DAB2IP;PTGS1;KLF8;CDC42EP4;DLC1;ID1;TYRO3;TCAP;SGK1;SKIL;PVRL2;FGFR1
TP63 CHEA	23/1399	0.384854	0.999996	0	0	1.08583	1.03685	DDR1;SEMA6B;IL1RN;EXOC3L2;PFKFB4;JUP;ARHGEF37;ITGB4;SYTL1;TMEM173;WDR66;NYNRIN;EPN3;CLIP2;MOB3C;SOCS1;FCGR2A;IL2RB;PTK2B;IRF6;SGK1;GAS2L2;ZNF385A
NFE2L2 CHEA	17/1022	0.391509	0.999996	0	0	1.09774	1.0294	NQO1;SMAD3;OSGIN1;DAB2IP;SLC30A1;VASN;ARHGAP23;MRC2;SERTAD3;PHOSPHO1;ZMIZ1;KLHDC8A;ADAMTSL4;HMOX1;KCTD17;SGK1;SYNC
SPI1 ENCODE	25/1540	0.402154	0.999996	0	0	1.07143	0.975985	C17ORF99;SELPLG;RGS14;FAM214B;RASGRP2;POLD4;SH3BP1;ZMIZ1;C1RL;PCED1B;TIGD3;NHLRC4;SYTL1;KRT13;APOBR;ARID3B;TMEM173;CCDC88B;MORN1;PHOSPHO1;TREML2;ORAI2;ARHGEF2;PLEKHO2;PLEC

## Sheet: H2_12h_CHEA
Supplemental Table 7: Transcription factors occupancy analysis for the de-regulated genes in AID-KMT2D K562 and HUDEP-2 cells with time serial analysis.
Term	Overlap	P-value	Adjusted P-value	Old P-value	Old Adjusted P-value	Odds Ratio	Combined Score	Genes
GATA2 CHEA	74/772	1.00678e-16	1.03698e-14	0	0	3.39055	124.89	DDR1;ACHE;COL18A1;BTG2;SPI1;NARF;HDAC11;DYSF;ICAM2;SPATC1L;F11R;RCSD1;SEPT9;CCND3;LASP1;RGS3;ZMIZ1;IMPA2;CREB3L1;RAC2;TNFAIP8L1;MYO18A;IDS;CCR7;TGM2;FOS;AMPD3;HSPG2;VAV2;MYL4;INF2;OBSCN;ORAI3;NINJ1;TMEM9;SYNC;PLIN5;CRB2;SLC45A3;AHNAK;IGSF3;MFI2;CSF2RB;FAM214B;CXXC5;FBLN2;TSPAN32;PTGS1;DNAJB2;ASIC4;RNF213;SEC14L1;KIAA1522;E2F2;PTK2B;TNFRSF14;LONRF2;S100A11;JUP;ATP8B2;MICAL2;KIAA1161;ARHGAP23;EHD1;…
GATA1 CHEA	73/807	3.54029e-15	1.82325e-13	0	0	3.16911	105.451	ACHE;COL18A1;BTG2;SPI1;AMHR2;SLC44A2;HDAC11;ICAM2;F11R;AQP1;ZFYVE28;TGM1;CCND3;LBH;ZMIZ1;CDH1;FAM122C;TUBB1;ZNF846;RAC2;MYO18A;DPF3;TGM2;SLC6A19;DNMT3A;ACSL5;RAB3IL1;FOS;AMPD3;HSPG2;VAV2;ELF4;CDC42EP4;SLFN14;HMBS;EHBP1L1;TMEM9;SLC29A1;SLC22A4;FAXDC2;FBLN2;RAP1GAP;TSPAN32;ASIC4;ATXN1;SEC14L1;SH3TC2;KIAA1522;E2F2;PTK2B;ACSS1;GAS2L1;RAB6B;GALNT6;TNK2;MICAL2;ARID3A;KIAA1161;EPOR;FOSL2;EHD1;CCDC88B;MO…
SMC3 ENCODE	65/1181	3.10477e-05	0.00106597	0	0	1.79326	18.614	EPHB6;ACHE;PHLDB1;MIDN;ZNF251;PIGZ;PEAR1;TSEN54;IL27RA;EPB41L4B;RGS3;EEF2K;ZMIZ1;RASSF5;C1RL;PDK2;TGM2;RNF43;DNMT3A;SLC30A1;RHOC;VAV2;KIFC2;PITPNM1;CDC42EP4;EHBP1L1;TYRO3;IRF9;PLEC;CRB2;SAMD5;TMPRSS9;SMIM5;ACSS2;AHNAK;LRP1;MFI2;LTBP2;FAM214B;RASIP1;THBS3;DNAJB2;ATXN1;SOCS1;CASKIN2;TNFRSF14;NPTX1;MICALCL;CCR10;ABCA2;HSD3B7;DMTN;CDC42BPG;ARID3A;CORO2A;POU2F2;EHD2;PTPRE;SLC4A8;MEX3B;FAM212A;KIF26A;A…
ZBTB7A ENCODE	102/2184	0.000152955	0.00393859	0	0	1.52368	13.386	MIDN;HDAC11;STMN3;TSEN54;FADS3;CCND3;LGALS1;ZMIZ1;STX16-NPEPL1;PALM;MIR22HG;FAM65A;PHLDA2;TGM2;SLC30A1;TUBA4A;CARHSP1;FNDC4;ORAI3;EHBP1L1;CERCAM;LPPR3;C19ORF66;SLC22A4;C11ORF95;MFI2;KRBA1;NDRG1;RAP1GAP;ACTR3C;RNF213;ATXN1;SOCS1;RRAS;CASKIN2;KIAA1522;TSPAN4;ZNF425;SKIL;JUP;MAFG-AS1;OSGIN1;KLHDC8B;CORO2A;VASN;MLXIPL;DLG5;BCL3;GTF2IRD1;REEP6;FGFR3;ACHE;CSRNP1;ZNF251;SLC44A2;PIGZ;SCPEP1;LASP1;C8G;ADA…
RUNX1 CHEA	65/1294	0.000419954	0.00865104	0	0	1.61828	12.5827	GPSM1;BTG2;MIDN;ICAM2;PRF1;STMN3;ARHGAP39;F11R;PPP1R18;TSEN54;NYNRIN;SEPT9;CCND3;LGALS1;RASSF5;OGFOD2;MYO18A;ITGB7;FAM65A;MAP3K6;GGT1;ZCCHC24;SLC11A1;TMC8;FOS;VAV1;VAV2;PTP4A3;ESRP2;ELF4;NINJ1;ORAI2;LCP2;MXRA7;IRF9;PLEC;SELPLG;STOML1;RGS14;CSF2RB;KRBA1;CXXC5;RASGRP2;TSPAN32;SH3BP1;MICAL1;CASKIN2;TSPAN4;KISS1R;E2F2;SUSD3;S100A11;DMTN;TMEM86B;DNAH17;GPR56;TNK2;ARID3A;ARID3B;BAIAP2;EHD2;P2RX1;TREML2…
EZH2 ENCODE	23/338	0.000848694	0.0145693	0	0	2.1914	15.4972	CA11;IGSF3;ITGB4;TINCR;RTN4RL2;OTOP2;COX6B2;NPAS1;EPOR;MLXIPL;LPHN1;MMP15;NCR3LG1;DLG5;KIF5A;CPAMD8;CHMP4C;FSCN1;EMILIN2;HRASLS5;C14ORF37;LONRF2;OSBP2
ZC3H11A ENCODE	12/129	0.00112796	0.016347	0	0	3.05721	20.7503	RNF43;ACHE;SOCS1;ZNF251;DUSP3;ACSS2;CDC42BPG;PTK2B;ARID3A;POU2F2;PEAR1;VAV2
CTCF ENCODE	82/1790	0.00126967	0.016347	0	0	1.47243	9.81961	EPHB6;ACHE;PHLDB1;MIDN;ZNF251;PIGZ;PEAR1;ESPN;TSEN54;GAREML;IL27RA;EPB41L4B;C8G;EEF2K;RASSF5;C1RL;MAP3K6;PHLDA2;ABCD1;PDK2;TGM2;RNF43;DNMT3A;SLC30A1;RHOC;VAV2;KIFC2;PITPNM1;CDC42EP4;EHBP1L1;TYRO3;CERCAM;IRF9;PLEC;CRB2;SAMD5;TMPRSS9;LAMA5;SMIM5;TAGLN;ACSS2;STOML1;MYRF;LRP1;MFI2;LTBP2;SNX33;FAM214B;RASGRP2;CLCN2;RASIP1;THBS3;DNAJB2;ATXN1;SOCS1;SEC14L1;CASKIN2;TRIM46;MICALCL;SAMD1;GAS2L1;CCR10;ABCA2…
TP63 CHEA	60/1399	0.0204881	0.234475	0	0	1.35134	5.2539	DDR1;EXOC3L2;IL1RN;ITGB4;RCSD1;CELSR2;PABPN1L;NYNRIN;SCPEP1;EPB41L4B;LBH;CDH1;TRIM29;NUDT18;FAM65A;ZNF385A;TGM2;SEMA6B;PAQR7;SYTL1;EMP2;TMEM173;SHISA7;EPN3;CLIP2;MOB3C;SLC7A8;FEZ1;IRF1;IRF6;SLC29A1;PFKFB4;HLF;STOML1;EPB42;RGS16;ACACB;NDRG1;NID2;WDR66;CKMT2;PDLIM1;GPR153;SOCS1;CCDC85C;KLRG2;PTK2B;GAS2L2;DMTN;JUP;ARHGEF37;CORO2A;POU2F2;PTPRE;FAM212A;FCGR2A;IL2RB;FAT2;GTF2IRD1;EPPK1
KLF4 CHEA	44/987	0.0249832	0.237848	0	0	1.40055	5.1674	CDKN1C;SLC22A4;RARG;MIDN;ZNF251;STOML1;TMEM63C;DGKA;PIGZ;KRBA1;RASGRP2;NDRG1;NID2;ARHGAP22;LASP1;SEC14L1;EEF2K;ZMIZ1;SOX15;TRIM46;CAMK1D;ANXA5;PTCH2;TMC8;APOBR;PAX6;ARID3A;FOS;TMC6;CDC42BPB;BAIAP2;UTF1;ESRP2;CYP2S1;ORAI3;BCL3;APOC1;SFXN3;FSCN1;PTPN6;IRF6;FGFR3;IRF9;PLEC
RCOR1 ENCODE	33/702	0.0254013	0.237848	0	0	1.47618	5.42196	CSRNP1;MIDN;TSEN54;DNAJB2;ARHGAP22;LGALS1;EEF2K;ZMIZ1;CASKIN2;SAMD1;N4BP3;SKIL;CCR10;RNF43;DNMT3A;OSGIN1;ABCA7;KLHDC8B;ARID3A;FOS;CABLES2;EHD1;ISG20;MOB3C;MEX3B;FAM212A;PITPNM1;CLCF1;BCL3;EHBP1L1;PCYOX1L;FSCN1;ST6GALNAC4
EGR1 CHEA	17/315	0.0318075	0.259926	0	0	1.69759	5.85339	JUP;RGS14;SLC11A1;TNK2;DNMT3A;NLRC5;MRGPRE;FOSL2;SELENBP1;RGS3;CDH1;RAB26;HSF4;KISS1R;ALPL;SAMD1;NAT8L
SUZ12 CHEA	69/1684	0.0328062	0.259926	0	0	1.28813	4.40171	CDKN1C;ACHE;PHLDB1;FLT4;DYSF;PIGZ;PEAR1;RCSD1;CELSR2;ZFYVE28;MRC2;LBH;RASSF2;EEF2K;ZMIZ1;RASSF5;EMILIN2;DPF3;PHLDA2;PTRF;CAMK1D;PAX6;RTN4RL2;COL2A1;SLC7A8;MMP15;SNPH;NAT8L;OSBP2;SAMD5;SLC22A4;TNXB;HLF;CABP7;LTBP2;SNX33;TULP1;NPAS1;NDRG1;CAMKK1;STRIP2;ATXN1;HSF4;KLRG2;SUSD3;NPTX1;TPPP;ZNF467;CSMD1;RAB6B;HES2;CCR10;HES5;FARP1;CA11;LRRN2;CD70;IQSEC3;SNX22;FHDC1;PARP12;EPOR;FOSL2;MLXIPL;PTPRE;DBNDD2;…
IRF8 CHEA	8/121	0.0461932	0.33985	0	0	2.09771	6.45031	EHD1;ISG20;SOCS1;MYO1C;ELF4;DGKA;TAPBPL;IRF9
EZH2 CHEA	13/237	0.0499598	0.343058	0	0	1.72296	5.1629	TNXB;NPAS1;MAPK11;RASSF2;COL2A1;PPP1R1B;DPF3;NPTX1;NAT8L;PTRF;FGFR3;HES2;CCR10
ZEB1 ENCODE	7/106	0.0602179	0.387653	0	0	2.09336	5.8819	ATXN1;JUP;KIFC2;SH2D3A;PCYOX1L;F11R;LLGL2
RAD21 ENCODE	51/1265	0.0755146	0.436377	0	0	1.25676	3.24675	EPHB6;ACHE;ZNF251;PIGZ;PEAR1;TSEN54;EPB41L4B;RGS3;EEF2K;RASSF5;C1RL;PDK2;TGM2;RNF43;SH2D3A;DNMT3A;RHOC;KIFC2;PITPNM1;TYRO3;IRF9;TRABD2A;PLEC;CRB2;SAMD5;TMPRSS9;SMIM5;ACSS2;FAM214B;THBS3;DNAJB2;ARHGAP22;ATXN1;SOCS1;SEC14L1;CASKIN2;TNFRSF14;MICALCL;CA11;HSD3B7;DMTN;KLHDC8B;POU2F2;EHD2;PTPRE;MEX3B;FAM212A;KIF26A;PLXNB3;PVRL2;FAM50B
FOXA1 ENCODE	11/205	0.0762601	0.436377	0	0	1.68076	4.3256	SELENBP1;RNF213;ESRP2;NINJ1;TSPAN4;SFXN3;TCP11L2;ZBTB42;EPS8L2;FOS;LLGL2
TCF3 CHEA	40/1006	0.122295	0.662967	0	0	1.23331	2.59158	CDKN1C;CSRNP1;LAMA5;RARG;HLF;CXXC5;PTGS1;PDLIM1;CCND3;ATXN1;EEF2K;CDH1;KIAA1522;DPF3;RHPN2;SKIL;LONRF2;DMTN;DNAAF3;LRRN2;TNK2;PTCH1;DNMT3A;DAB2IP;PAX6;TNFRSF1B;AP3B2;UTF1;KLF8;CDC42EP4;DLC1;TYRO3;FSCN1;ALPL;PTPN6;KIFC3;SLC29A1;PVRL2;SSBP3;FGFR1
HNF4A ENCODE	48/1276	0.181226	0.933313	0	0	1.16269	1.98589	CSRNP1;LAMA5;MIDN;ZBTB42;GPT;CAPG;LTBP3;CLCN2;TSEN54;RAP1GAP;SEPT9;LASP1;ATXN1;SOCS1;C8G;AIFM2;IMPA2;STX16-NPEPL1;CASKIN2;TNFAIP8L1;KISS1R;MIR22HG;ZNF425;EPS8L2;SLC25A42;SKIL;PDK2;TMEM86B;MAFG-AS1;DNMT3A;ACSL5;SLC30A1;KIAA1161;CORO2A;OTOP2;CYP4F12;LIME1;VASN;ISG20;MLXIPL;INF2;FNDC4;MMP15;ESRP2;CLDN7;BCL3;NINJ1;GTF2IRD1
SALL4 CHEA	15/355	0.193099	0.947104	0	0	1.30587	2.14757	SPON2;SDC4;LRRN2;CDC42BPB;NID2;PARP12;PDLIM1;FGD4;STRIP2;SEC14L1;HMBS;FSCN1;HMOX1;KIFC3;SSBP3
SMAD4 CHEA	23/584	0.21324	0.964854	0	0	1.21456	1.8769	BTG2;CAMK1D;WSCD2;ANXA5;AKR1E2;KRT13;MICAL2;PAX6;LTBP2;F11R;JAKMIP1;SYNE3;NDRG1;DNAJB2;FGD4;EPB41L4B;CCND3;ATXN1;GPR161;DLC1;LPIN1;SKIL;SSBP3
PPARD CHEA	12/285	0.229334	0.964854	0	0	1.2996	1.91376	PREX1;SPTBN4;LRRC48;CLIP2;LASP1;INF2;RGS3;IMPA2;OSGIN1;ACSL5;PCOLCE;POU2F2
SPI1 ENCODE	56/1540	0.229647	0.964854	0	0	1.12134	1.64973	EPHB6;SAMD9L;ZNF251;SLC44A2;TSEN54;DOCK11;RASSF2;EEF2K;HEPH;ZMIZ1;C1RL;RAC2;TNFAIP8L1;LRRC48;PAQR7;NHLRC4;SYTL1;TMEM173;TUBA4A;VAV1;PHOSPHO1;DOK3;ELF4;IRF1;ORAI3;EHBP1L1;ORAI2;FSCN1;DPEP2;LCP2;PLEC;C17ORF99;SELPLG;TTYH2;RGS14;MIR3150A;FAM214B;RASGRP2;SH3BP1;MICAL1;PCED1B;S100A11;GALNT6;WSCD2;MAFG-AS1;TNFSF13;KRT13;APOBR;ABCA7;ARID3B;CCDC88B;MORN1;TREML2;GTF2IRD1;SIGLEC6;FAM50B
STAT5A ENCODE	10/233	0.23784	0.964854	0	0	1.32519	1.90318	DNAJB2;ACTR3C;FAM213B;MFI2;HMBS;C1RL;EHBP1L1;ZNF425;SIPA1;HIST1H2AC
ESR1 CHEA	7/154	0.243555	0.964854	0	0	1.4063	1.98627	IGSF3;LRP1;CAPN5;ACSL5;FOS;KIFC3;SLC29A1
MYOD1 ENCODE	7/166	0.304769	0.999996	0	0	1.29935	1.54389	MOB3C;SMIM5;SDC4;PCYOX1L;MRGPRE;TMEM9;SYNC
FOSL2 ENCODE	8/196	0.31646	0.999996	0	0	1.25594	1.44503	SLC22A4;ISG20;RRAS;FAM46B;MFI2;BCL3;PTPRH;FOSL2
HDAC2 ENCODE	7/175	0.352516	0.999996	0	0	1.22917	1.2816	NQO1;MEX3B;EEF2K;ANXA5;CERCAM;STMN3;SKIL
POU5F1 CHEA	10/261	0.355285	0.999996	0	0	1.17564	1.21659	RARG;CAMK1D;ZMIZ1;LRRN2;CDH1;PTCH1;FOXH1;MYO18A;PAX6;SKIL

## Sheet: H2_24h_CHEA
Supplemental Table 7: Transcription factors occupancy analysis for the de-regulated genes in AID-KMT2D K562 and HUDEP-2 cells with time serial analysis.
Term	Overlap	P-value	Adjusted P-value	Old P-value	Old Adjusted P-value	Odds Ratio	Combined Score	Genes
GATA1 CHEA	75/807	1.0431e-18	1.08482e-16	0	0	3.69387	152.942	SLC48A1;LGALS3BP;ACHE;COL18A1;BTG2;SPI1;AMHR2;ICAM2;SLC2A1;SLC4A1;AQP1;CCND3;LBH;UBASH3B;ZMIZ1;FAM122C;TUBB1;RPS6KA1;MYO18A;DPF3;TGM2;SLC6A19;CISH;TPM1;RAB3IL1;FRMD4A;AMPD3;HSPG2;SLC22A23;KEL;ELF4;CDC42EP4;SLFN14;HMBS;EHBP1L1;SLC29A1;ZFPM1;SEC22C;INO80C;SLC22A4;HEMGN;FECH;FAXDC2;ENDOD1;GATA5;FBLN2;RAP1GAP;TSPAN32;FAM117A;ASIC4;SH3TC2;KIAA1522;E2F2;PTK2B;ACSS1;GAS2L1;RAB6B;RAP1GAP2;GALNT6;SMAD3;SE…
GATA2 CHEA	64/772	9.89833e-14	5.14713e-12	0	0	3.19528	95.679	DDR1;ACHE;COL18A1;BTG2;SPI1;NARF;DYSF;ICAM2;SLC4A1;SPATC1L;RCSD1;CCND3;ZMIZ1;CREB3L1;MYO18A;SH3BGRL3;CCR7;TGM2;SLC36A1;STARD8;CCDC113;FRMD4A;AMPD3;HSPG2;MYL4;SLC22A23;TAL1;NINJ1;SYNC;ZFPM1;PLIN5;CRB2;INO80C;AHNAK;IGSF3;GATA5;CSF2RB;FAM214B;CXXC5;FBLN2;TSPAN32;FAM117A;PTGS1;DNAJB2;ASIC4;RAB11FIP1;KIAA1522;LMNA;E2F2;PTK2B;LONRF2;S100A11;JUP;ATP8B2;UROS;MICAL2;ARHGAP23;MLXIPL;LPAR5;SFXN3;PLXNB3;TMCC…
RUNX1 CHEA	64/1294	3.94825e-05	0.00136873	0	0	1.78789	18.1286	GPSM1;BTG2;ITPRIP;ITGB2;ICAM2;PRF1;SLC2A1;SLC4A1;TSEN54;FAM216A;NYNRIN;LIPE;CCND3;LGALS1;ANXA6;MYO18A;SH3BGRL3;ITGB7;FAM65A;MAP3K6;GGT1;AGFG2;CEP68;KLF13;SLC11A1;TPM1;TMC8;FRMD4A;DYNLL1;VAV1;PTP4A3;ELF4;NINJ1;MXRA7;ZFPM1;LY6E;SEC22C;ZNF397;STOML1;RGS14;CSF2RB;CXXC5;TSPAN32;FAM117A;MKNK2;KISS1R;E2F2;RELT;S100A11;BANP;DMTN;TMEM86B;SMAD3;GPR56;BAIAP2;WDR54;EHD2;P2RX1;TREML2;BCL3;CASS4;RGS10;ADCK5;TU…
ZBTB7A ENCODE	92/2184	0.000323038	0.00839899	0	0	1.51989	12.2164	ACHE;CSRNP1;PIGZ;TSEN54;FAM216A;SCPEP1;CCND3;LGALS1;ZMIZ1;ADAMTSL4;RPS6KA1;PALM;TK2;FAM65A;GGACT;TGM2;JMJD4;TSC22D4;DUSP3;MMD;TESC;TMC8;EMP2;SLC30A1;DYNLL1;RHOC;TUBA4A;ZNF16;SLC22A23;FNDC4;KIFC2;MMP15;CDC42EP4;EHBP1L1;ZSCAN25;TLCD1;SLC29A1;CHMP6;KCTD18;ZFPM1;DBN1;SEC22C;CUL9;SLC22A4;C11ORF95;LAMA5;AHNAK;LRP1;ZNF391;SLC43A1;CXXC5;NDRG1;CLCN2;RAP1GAP;FAM117A;THBS3;SOCS1;RAB11FIP1;SYNGR2;ZNF629;RAB2…
CTCF ENCODE	76/1790	0.000901601	0.0181915	0	0	1.51745	10.6393	SLC48A1;ACHE;PHLDB1;TOR2A;PIGZ;NRARP;PEAR1;LIMD1;ESPN;TSEN54;EEF2K;NIPAL3;PIM2;MAP3K6;PDK2;TGM2;SLC36A1;ZBTB39;SLC30A1;DYNLL1;RHOC;KCTD6;SLC22A23;KIFC2;CDC42EP4;MED20;EHBP1L1;TYRO3;TLCD1;IFT46;KCTD18;CRB2;LAMA5;WDR25;SMIM5;ACSS2;STOML1;MYRF;LRP1;LTBP2;FAM214B;EFNA4;CLCN2;THBS3;DNAJB2;MUC1;SOCS1;DPH1;TLDC1;FAM83D;GAS2L1;CNNM3;RELT;ZNF142;DMTN;ATP8B2;LIMK2;GPR3;OTOP2;HIPK2;EHD2;PTPRE;SLC25A37;MEX3B…
SMC3 ENCODE	54/1181	0.00104951	0.0181915	0	0	1.62501	11.1467	ACHE;PHLDB1;TOR2A;PIGZ;PEAR1;LIMD1;TSEN54;EEF2K;ZMIZ1;NIPAL3;PIM2;PDK2;TGM2;SLC36A1;CISH;SLC30A1;RHOC;KCTD6;KIFC2;CDC42EP4;EHBP1L1;TYRO3;TLCD1;CRB2;WDR25;SMIM5;ACSS2;AHNAK;LRP1;LTBP2;FAM214B;EFNA4;THBS3;DNAJB2;PGBD1;MUC1;SOCS1;TLDC1;FAM83D;RELT;CBX6;DMTN;LIMK2;HIPK2;EHD2;PTPRE;MEX3B;KIF26A;ADCK5;ALPL;TMCC2;PVRL2;CLUAP1;PVRL1
TP63 CHEA	60/1399	0.00252939	0.0375795	0	0	1.51899	9.08319	DDR1;EXOC3L2;IL1RN;ITPRIP;ITGB4;RCSD1;CELSR2;NYNRIN;KIAA0930;SCPEP1;LBH;POFUT1;TRIM29;NUDT18;FAM65A;GGACT;LDLRAP1;ZNF385A;TGM2;SEMA6B;PAQR7;ANXA2;TPM1;SYTL1;EMP2;TMEM173;SHISA7;SLC22A23;EPN3;CLIP2;SLC7A8;IRF1;ZSCAN25;IRF6;SLC29A1;ZFPM1;PFKFB4;HLF;STOML1;EPB42;ACACB;NDRG1;C12ORF66;PDLIM1;SOCS1;SYNGR2;KLRG2;TLDC1;PTK2B;GAS2L2;DMTN;JUP;ARHGEF37;VDR;SEMA4B;PTPRE;FCGR2A;ZFP62;IL2RB;EPPK1
EZH2 ENCODE	19/338	0.00606947	0.0789031	0	0	1.98067	10.1103	CA11;IGSF3;ITGB4;PPM1N;TINCR;HBA1;OTOP2;COX6B2;EPOR;MLXIPL;LPHN1;MMP15;DLG5;KIF5A;FSCN1;EMILIN2;C14ORF37;LONRF2;OSBP2
ZEB1 ENCODE	8/106	0.0135773	0.153464	0	0	2.69444	11.5843	ZNF70;JUP;KIFC2;ZFP62;SH2D3A;MGST3;NIPAL3;PCYOX1L
ZC3H11A ENCODE	9/129	0.0147561	0.153464	0	0	2.47693	10.443	ACHE;SOCS1;DUSP3;ACSS2;TANGO2;PTK2B;TLDC1;PEAR1;COMMD7
SP2 ENCODE	41/994	0.0208907	0.197512	0	0	1.43828	5.5639	ZNF496;NARF;STOML1;ROGDI;ZSCAN9;SPATC1L;FAM117A;PGBD1;DUSP12;ARVCF;PODNL1;C19ORF54;ZNF629;POFUT1;NIPAL3;TLDC1;PTK2B;AGFG2;PDK2;CEP68;ZNF142;JUP;TANGO2;ELAC1;GOLPH3L;ZFYVE21;BAIAP2;C9ORF116;ZNF16;KCTD7;ZNF70;ZNF619;KIFC2;ZFP62;POLR3C;TTC5;MED20;SFXN3;PCYOX1L;ZSCAN25;IFT46
RCOR1 ENCODE	30/702	0.0294432	0.255175	0	0	1.48558	5.23712	INO80C;CSRNP1;NRARP;TSEN54;DNAJB2;ARHGAP22;LGALS1;RAB11FIP1;EEF2K;ZMIZ1;UCP2;NIPAL3;PIM2;CEP68;ZFHX2;MMD;OSGIN1;DYNLL1;COMMD7;MEX3B;ZNF839;CLCF1;BCL3;EHBP1L1;PCYOX1L;FSCN1;ADCK5;ATF5;ST6GALNAC4;ATP6V0C
KLF4 CHEA	39/987	0.0420633	0.327738	0	0	1.37074	4.34329	CDKN1C;EIF4A2;SLC22A4;TOR2A;STOML1;TMEM63C;PIGZ;NDRG1;ARHGAP22;EEF2K;CSRP1;ZMIZ1;UCP2;RPS6KA1;MFSD2A;BANP;ANXA2;AGK;ANXA5;CCDC113;PPP2R5B;TMC8;APOBR;TMC6;CDC42BPB;BAIAP2;UTF1;HIPK2;TMEM231;CYP2S1;BCL3;APOC1;SFXN3;FSCN1;PTPN6;TLCD1;IRF6;IFT46;FGFR3
RFX5 ENCODE	24/559	0.0456666	0.327738	0	0	1.48786	4.59212	TOR2A;CBX6;DUSP3;GOLPH3L;LTBP4;NRARP;SLC30A1;GPR3;COMMD7;PHYHIP;COQ10A;TMEM231;ARVCF;TUBA1A;ZNF70;LPHN1;C19ORF54;IFI27;KCNQ1OT1;UCP2;APOC1;ANXA6;PIM2;AGFG2
RAD21 ENCODE	48/1265	0.0472699	0.327738	0	0	1.3164	4.01749	CRB2;ACHE;WDR25;TOR2A;SMIM5;ACSS2;PIGZ;PEAR1;FAM214B;LIMD1;TSEN54;THBS3;DNAJB2;ARHGAP22;MUC1;SOCS1;EEF2K;DPH1;NIPAL3;TLDC1;PIM2;FAM83D;PDK2;TGM2;SLC36A1;ZBTB39;CA11;CBX6;DMTN;SH2D3A;LIMK2;RHOC;KCTD6;HIPK2;EHD2;PTPRE;MEX3B;KIFC2;KIF26A;TYRO3;PLXNB3;ADCK5;TMCC2;TLCD1;IFT46;PVRL2;CLUAP1;PVRL1
TCF3 CHEA	39/1006	0.0532675	0.346239	0	0	1.34242	3.93656	CDKN1C;ZNF496;EIF4A2;CSRNP1;LAMA5;HLF;SLC43A1;CXXC5;PTGS1;PDLIM1;DUSP12;CCND3;MUC1;EEF2K;CSRP1;KIAA1522;DPF3;LONRF2;DMTN;LRRN2;SEMA4B;PTCH1;DAB2IP;LHFPL2;UTF1;KCTD6;KLF8;SLC22A23;CDC42EP4;ID1;TYRO3;FSCN1;ALPL;PTPN6;SLC29A1;PVRL2;SSBP3;FGFR1;TAF1
UBTF ENCODE	59/1631	0.0642433	0.371489	0	0	1.25352	3.44101	ZNF496;CSRNP1;PHLDB1;SLC2A1;NRARP;CHD4;LIMD1;ESPN;TSEN54;FAM216A;EEF2K;ZMIZ1;UBTF;NUDT18;DPF3;ZBTB39;KLF13;ELAC1;ZFYVE21;SLC30A1;DYNLL1;SEPT5;KCTD6;SLC22A23;CLIP2;ZNF839;IRF1;TYRO3;SYNC;KCTD18;AHNAK;SLC43A1;ENDOD1;CLCN2;DNAJB2;STRIP2;SYNGR2;ZNF629;TP53INP2;ZNF623;GAS2L1;CNNM3;RELT;CBX6;SMAD3;PTCH1;FOXJ2;FOSL2;SLC25A37;MEX3B;RGCC;SLC6A9;CLCF1;RGS10;ZNF777;LPIN1;FGFR3;SSBP3;PVRL1
NFE2L2 CHEA	39/1022	0.0642961	0.371489	0	0	1.31943	3.62084	SLC48A1;OAT;ITGB2;ABCB9;ACACB;C12ORF66;MRC2;SCPEP1;LBH;ZMIZ1;ADAMTSL4;KIAA1522;LMNA;BBS5;PRRT1;CEP68;SEMA4A;NQO1;SMAD3;MMD;TPM1;DAB2IP;GOLPH3L;OSGIN1;SLC30A1;TMC6;SNX22;AMPD3;LHFPL2;VASN;HIPK2;ARHGAP23;SLC22A23;PHOSPHO1;KLHDC8A;FSCN1;RGS10;KCTD17;SYNC
EGR1 CHEA	14/315	0.087393	0.478362	0	0	1.5348	3.74084	SMAD3;JUP;RGS14;SLC11A1;TANGO2;MRGPRE;FOSL2;SELENBP1;RAB26;KISS1R;ALPL;NAT8L;RELT;HSPA1A
SUZ12 CHEA	59/1684	0.101113	0.525789	0	0	1.20903	2.77052	CDKN1C;ACHE;PHLDB1;DYSF;PIGZ;PEAR1;RCSD1;CELSR2;MRC2;LBH;RASSF2;EEF2K;UBASH3B;ZMIZ1;EMILIN2;DPF3;PITX1;MFSD2A;TESC;TPM1;COL2A1;SLC7A8;MMP15;TAL1;SNPH;NAT8L;ZFPM1;OSBP2;SLC22A4;SEMA7A;TNXB;HLF;CABP7;GATA5;ALOX12;LTBP2;NDRG1;CAMKK1;STRIP2;KLRG2;NRIP3;TPPP;ZNF467;RAB6B;HES5;CA11;LRRN2;IQSEC3;SNX22;LHFPL2;FHDC1;EPOR;FOSL2;HIPK2;MLXIPL;PTPRE;CLCF1;RGS10;FGFR3
IRF8 CHEA	6/121	0.150645	0.73738	0	0	1.71472	3.24567	SOCS1;ELF4;NCF4;UCP2;CD37;TAPBPL
STAT5A ENCODE	10/233	0.155984	0.73738	0	0	1.47559	2.74165	DNAJB2;SLC25A37;WDR25;MUC1;SEMA4B;HMBS;EHBP1L1;ZNF425;TLCD1;SIPA1
MYOD1 ENCODE	7/166	0.223454	0.999995	0	0	1.44607	2.16701	SMIM5;SDC4;ANXA6;PCYOX1L;MRGPRE;SYNC;KCTD7
TP53 CHEA	12/319	0.239742	0.999995	0	0	1.28499	1.83521	ZNF397;BTG2;COL2A1;GLIPR2;AXL;SLC30A1;FRMD4A;SYNC;ESPN;COX6B2;EFNA4;PVRL1
EGR1 ENCODE	19/537	0.246223	0.999995	0	0	1.20704	1.69168	SLC36A1;KLF13;PTGES2;MGST3;ANXA5;FOXH1;PLEKHA4;PTPRE;MEX3B;CCND3;TUBA1A;PQLC1;ZMIZ1;DPH1;DLG4;MAP3K6;FAN1;BOK;SEC22C
EZH2 CHEA	9/237	0.271706	0.999995	0	0	1.29635	1.68918	RASSF2;COL2A1;TNXB;TESC;DPF3;NAT8L;ZFPM1;PITX1;FGFR3
TCF3 ENCODE	28/840	0.287672	0.999995	0	0	1.13488	1.41399	ZNF397;SLC48A1;EIF4A2;CSRNP1;NUMBL;PDLIM1;SOCS1;LGALS1;EEF2K;ZMIZ1;POFUT1;E2F2;SH3BGRL3;TSC22D4;GALNT6;GSN;SMAD3;KLF13;NHLRC4;IQSEC1;ANXA5;PPP2R5B;TUBA4A;FOSL2;KCTD7;SLC22A23;SLC29A1;SSBP3
ESR1 CHEA	6/154	0.30694	0.999995	0	0	1.3301	1.57099	SLC22A23;IGSF3;LRP1;CAPN5;SLC29A1;BANP
RELA ENCODE	16/484	0.36384	0.999995	0	0	1.12216	1.13455	INO80C;EIF4A2;C17ORF99;SEMA7A;ITGB2;ICAM2;TAPBPL;RCSD1;DNAJB2;SYNGR2;IRF1;NINJ1;MKNK2;FSCN1;TLCD1;MFSD2A
SMAD4 CHEA	19/584	0.372007	0.999995	0	0	1.10388	1.09156	BTG2;WSCD2;ANXA5;KRT13;MICAL2;FRMD4A;LTBP2;SYNE3;NDRG1;DNAJB2;SLC22A23;CCND3;ID1;REPS2;PPAPDC1A;LPIN1;SSBP3;AGFG2;TAF1
