# Supplementary material for: The H3K4 methyltransferase KMT2D is an essential cofactor for GATA1 at erythroid gene enhancers
Source: Research Square preprint supplement (doi:10.21203/rs.3.rs-7853319/v1), 2025-10-22
Supplement: Supplementary file 5 [file 696175e77c13bd37510a4226.xlsx]

## Sheet: Hudep2_limmavoom_IAA6hVSDMSO
Supplemental Table 5: The RNA transcriptome analysis of AID-KMT2D HUDEP-2 cells with 5-Ph-IAA treatment for 6 hours, 12 hours and 24 hours vs. without 5-Ph-IAA treatment grown in the expansion culture.
gene_name	logFC	AveExpr	t	P.Value	adj.P.Val	B	C25_D6_1	C25_D6_2	C25_I6_1	C25_I6_2
A3GALT2	0.727725	0.210867	1.9136	0.0732871	0.271276	-4.03397	18	31	46	30
A4GALT	-0.232617	6.63359	-5.66907	3.17413e-05	0.001259	1.95683	2952	2846	2225	2393
AAAS	-0.0199444	6.37983	-0.42251	0.678139	0.850157	-7.26309	2350	2169	2027	2142
AACS	0.0914942	4.44778	1.10055	0.286983	0.564937	-6.12819	550	589	541	594
AADAT	0.328689	3.57436	2.84847	0.0114049	0.086074	-3.04707	301	272	305	369
AAED1	-0.100681	3.0773	-0.719428	0.482002	0.728697	-6.00483	217	254	206	204
AAGAB	0.0426736	6.11878	0.885738	0.38856	0.654276	-6.87674	1888	1800	1731	1824
AAK1	-0.0516219	2.74776	-0.342532	0.736301	0.879889	-6.09555	188	179	170	162
AAMDC	-0.0727035	1.25877	-0.293011	0.773188	0.900282	-5.64836	67	64	62	55
AAMP	0.020813	7.00188	0.525031	0.606586	0.810196	-7.37525	3488	3365	3207	3300
AAR2	0.0213787	5.75281	0.364226	0.720342	0.870624	-7.09978	1433	1447	1385	1354
AARS	0.0713669	8.22447	2.45452	0.0256209	0.146785	-5.0457	7911	7808	7468	7989
AARS2	0.0931855	6.42206	2.13429	0.0482381	0.21185	-5.24624	2232	2239	2176	2288
AARSD1	0.370017	2.60776	2.19687	0.0427215	0.198377	-3.98628	130	160	154	196
AASDH	-0.0955429	4.49525	-1.18003	0.254819	0.533217	-6.05542	614	641	535	564
AASDHPPT	-0.0571896	6.91704	-1.35251	0.194565	0.465669	-6.58216	3406	3233	2962	3010
AATF	0.0511533	6.9172	1.20239	0.246283	0.524101	-6.76723	3346	3056	2983	3220
ABC7-42389800N19.1	-0.0756657	5.03179	-1.05214	0.307989	0.584394	-6.37449	861	950	765	841
ABC7-43041300I9.1	-0.56409	0.229854	-1.532	0.144582	0.399507	-4.4982	31	46	30	19
ABCA11P	0.147689	0.679698	0.509421	0.617242	0.817367	-5.42398	39	42	42	42
ABCA17P	0.24835	4.63161	3.2383	0.00501395	0.0500744	-2.56833	604	621	642	720
ABCA2	-0.40144	3.8799	-3.79677	0.00152303	0.0217	-1.20477	487	425	318	327
ABCA3	0.126678	6.52574	3.04998	0.00747125	0.0655053	-3.5073	2381	2369	2328	2526
ABCA7	-0.482151	6.21839	-9.42285	5.02801e-08	8.03529e-06	8.6609	2287	2457	1519	1657
ABCB10	-0.0747806	8.47078	-2.57583	0.0200298	0.125274	-4.85463	9911	9709	8210	9235
ABCB10P1	-0.303914	3.53628	-2.6993	0.0155442	0.106443	-3.32147	355	339	246	280
ABCB10P3	-0.504011	3.87403	-4.87438	0.000157482	0.00406474	1.00253	496	445	297	323
ABCB10P4	-0.0880845	2.42642	-0.5059	0.619658	0.81951	-5.92093	145	152	141	122
ABCB6	-0.28508	2.5084	-1.53498	0.143853	0.398556	-4.9692	168	168	152	111
ABCB7	0.0536522	5.71676	0.92232	0.36973	0.637794	-6.72105	1379	1399	1358	1343
ABCB8	-0.0868756	6.49016	-1.86179	0.0806488	0.285583	-5.72607	2471	2523	2028	2377
ABCB9	-0.184334	2.33696	-1.08006	0.295743	0.573605	-5.45544	147	142	118	120
ABCC1	0.0591754	5.58797	1.07543	0.297746	0.575601	-6.52881	1274	1264	1185	1290
ABCC10	-0.00638891	5.856	-0.125915	0.90133	0.963247	-7.1932	1566	1561	1386	1528
ABCC4	0.0500501	7.14161	1.31179	0.207656	0.481829	-6.68617	3855	3623	3508	3735
ABCC5	-0.0905686	7.63409	-2.56054	0.0206646	0.128148	-4.73425	5397	5649	4669	5037
ABCD1	-0.518261	1.18461	-1.90368	0.0746487	0.273866	-4.15037	65	81	55	41
ABCD3	0.0999637	5.88318	1.92471	0.071789	0.268695	-5.44881	1506	1566	1462	1619
ABCD4	0.153794	4.45591	1.86368	0.0803686	0.284835	-5.09588	546	574	571	595
ABCE1	-0.0268319	8.54079	-0.953252	0.3543	0.623508	-7.3482	10179	10070	9044	9556
ABCF1	0.0686681	8.44901	2.38413	0.0295107	0.159086	-5.21719	9379	9010	8598	9453
ABCF2	0.0973709	7.6457	2.93724	0.00947151	0.0764667	-3.98783	5274	5155	5086	5355
ABCF3	0.0386542	6.24999	0.805846	0.43186	0.690209	-6.98343	2071	1973	1918	1970
ABCG2	-0.340145	3.14685	-2.08816	0.0527148	0.223439	-4.3119	311	232	165	236
ABHD10	0.154521	5.53773	2.62945	0.0179479	0.116296	-4.06552	1152	1221	1172	1299
ABHD11	-0.262156	5.19513	-3.98356	0.00102262	0.0161614	-1.16926	1127	1035	813	873
ABHD12	0.0925387	4.94745	1.23781	0.233212	0.51118	-6.14122	808	803	722	889
ABHD13	0.0638509	4.74886	0.856328	0.404154	0.669366	-6.46692	719	698	642	745
ABHD14A	-0.114146	2.84019	-0.77418	0.44984	0.70351	-5.88598	188	213	171	175
ABHD14B	0.0427176	5.71194	0.799972	0.435161	0.692295	-6.82577	1380	1402	1279	1403
ABHD15	0.125789	2.3064	0.694947	0.496816	0.738325	-5.77224	143	113	120	140
ABHD16A	0.0554937	1.69036	0.250216	0.805527	0.919006	-5.7828	75	96	77	88
ABHD16B	0.242544	2.25077	1.31941	0.205156	0.478414	-5.16939	108	128	116	145
ABHD17A	-0.185198	7.3621	-5.11032	9.71251e-05	0.00281133	0.656296	4642	4811	3706	4075
ABHD17B	0.135603	4.28143	1.33319	0.200693	0.472731	-5.80115	494	507	441	594
ABHD2	-0.14058	6.71894	-3.25386	0.00485085	0.0487968	-3.13366	2935	3021	2497	2560
ABHD3	-0.0321882	2.61667	-0.156777	0.877334	0.952592	-6.09894	133	210	128	180
ABHD4	-0.326659	2.98286	-2.40263	0.0284374	0.15544	-3.72144	238	238	170	185
ABHD5	-0.153125	4.84484	-2.09198	0.0523305	0.222494	-4.84022	800	831	680	693
ABHD6	-0.0626823	1.82154	-0.304631	0.764478	0.895012	-5.80746	101	93	78	96
ABHD8	-0.0147428	2.05836	-0.0778222	0.938911	0.977896	-5.92488	120	105	100	108
ABI1	0.0173979	5.60983	0.30254	0.766043	0.896111	-7.07632	1271	1345	1176	1301
ABI2	-0.117317	6.05787	-2.28891	0.0356599	0.17626	-4.86351	1847	1893	1493	1736
ABL1	-0.12826	7.03716	-3.46871	0.00306917	0.0358455	-2.75801	3735	3661	3072	3261
ABL2	0.223244	5.24964	3.0237	0.00789688	0.067828	-3.19267	880	1021	1015	1056
ABO	-0.036615	0.166837	-0.0937488	0.926444	0.972669	-5.4182	28	32	40	19
ABR	-0.126401	6.48315	-2.90903	0.0100485	0.0791454	-3.78193	2566	2468	2105	2211
ABRACL	0.164749	4.31773	1.94897	0.0686132	0.262264	-4.91196	509	505	505	559
ABT1	0.125897	6.68752	2.98558	0.00855685	0.0715375	-3.68125	2674	2639	2677	2750
ABTB1	-0.0704627	0.692833	-0.22942	0.821379	0.926196	-5.519	46	42	47	33
ABTB2	-0.168773	1.5477	-0.728782	0.476413	0.724304	-5.51915	74	93	69	69
AC000089.3	-0.267632	0.700305	-0.908078	0.376986	0.644401	-5.18174	45	50	40	34
AC000120.7	-0.00886458	0.147249	-0.0262648	0.979363	0.990856	-5.41745	31	28	24	31
AC000123.4	0.0639481	0.911044	0.23548	0.816751	0.923992	-5.57185	50	48	49	47
AC002056.3	0.0242047	0.0868091	0.0655866	0.9485	0.980102	-5.403	21	37	25	28
AC002116.7	0.235364	0.133022	0.686514	0.50198	0.741113	-5.2165	31	23	29	30
AC002310.12	1.37616	-0.437371	3.4151	0.0034411	0.0388022	-2.04557	14	10	29	30
AC002467.7	0.572385	1.2959	2.07965	0.0535811	0.22563	-3.9097	66	44	60	93
AC003104.1	0.817199	0.6583	2.7297	0.0145978	0.10216	-2.86062	33	30	56	49
AC003665.1	0.0102975	0.897775	0.0364652	0.971352	0.988135	-5.59319	53	46	52	42
AC004057.1	-0.467602	5.09486	-2.82102	0.0120766	0.0891386	-3.54589	1060	1090	981	553
AC004074.3	-0.187529	1.48291	-0.770609	0.451896	0.705342	-5.47231	89	72	54	79
AC004158.2	0.275209	0.615814	0.9342	0.363751	0.633197	-5.14487	37	37	42	42
AC004257.3	0.0142901	0.711656	0.0494491	0.961159	0.9839	-5.5464	47	40	41	41
AC004381.6	-0.00956141	5.31915	-0.156937	0.87721	0.952555	-7.01832	1082	1076	941	1066
AC004447.2	-0.150416	3.48083	-1.1859	0.252558	0.531135	-5.70793	301	334	231	306
AC004453.8	-0.212365	0.376852	-0.646695	0.526776	0.758757	-5.28722	32	43	32	28
AC004463.6	0.0542836	1.10543	0.210858	0.835596	0.932112	-5.62705	59	54	49	61
AC004797.1	0.155345	3.6907	1.23553	0.234037	0.5116	-5.723	316	341	375	315
AC004840.9	-0.196284	1.90112	-0.889388	0.386653	0.652924	-5.49854	94	123	73	104
AC004893.11	0.0633009	1.50392	0.266537	0.793147	0.91209	-5.72416	85	65	64	82
AC004951.5	-0.148355	0.0764788	-0.427911	0.674281	0.84827	-5.32471	28	31	21	29
AC004967.7	0.190851	2.85848	1.30304	0.210558	0.484717	-5.37191	198	168	184	206
AC004980.7	0.308021	1.98122	1.46887	0.160784	0.423175	-4.91048	100	91	90	134
AC004987.9	0.645399	0.360654	1.96546	0.0665274	0.257381	-3.97623	23	32	41	39
AC005003.1	0.00444867	0.510155	0.013815	0.989144	0.996529	-5.49929	31	46	37	34
AC005076.5	0.0446999	0.0518779	0.114713	0.910065	0.966672	-5.39187	30	24	36	19
AC005104.3	-0.18843	0.344696	-0.591108	0.562506	0.779931	-5.30989	35	37	30	29
AC005154.6	-0.0106448	3.79649	-0.103401	0.918898	0.969749	-6.50931	370	380	345	352
AC005253.2	-0.100597	1.58078	-0.444243	0.662672	0.842593	-5.68556	89	77	76	69
AC005306.3	-0.0091496	0.0943104	-0.0244054	0.980824	0.991768	-5.40613	38	21	29	24
AC005307.3	-0.0118568	2.00797	-0.0614129	0.951772	0.981411	-5.90977	116	101	98	103
AC005519.4	-0.320359	-0.0448213	-0.82881	0.41911	0.679947	-5.09463	24	34	27	17
AC005682.5	0.261369	3.33273	1.80521	0.0894296	0.303518	-4.82771	289	211	285	271
AC005682.6	0.708408	-0.155282	1.93233	0.0707786	0.266601	-3.99256	17	20	26	31
AC005785.2	-0.236301	1.06484	-0.88	0.39157	0.657164	-5.28518	61	60	54	43
AC005841.1	0.248992	0.246765	0.723369	0.479643	0.726545	-5.21722	33	25	37	28
AC005943.4	0.0761571	0.288418	0.213263	0.83375	0.931516	-5.42914	40	25	24	40
AC005943.5	-0.29258	1.254	-1.10231	0.286239	0.564432	-5.13606	86	58	49	59
AC006042.6	0.0101238	1.33426	0.0368975	0.971012	0.988004	-5.70918	84	54	51	78
AC006116.13	-0.304209	0.0476346	-0.879993	0.391574	0.657164	-5.07597	29	32	21	25
AC006116.20	0.125389	0.590947	0.403404	0.691861	0.857292	-5.4462	43	34	44	35
AC006486.1	0.485044	0.18938	1.45772	0.163798	0.426996	-4.57696	24	27	33	34
AC006538.1	0.290482	2.48188	1.66843	0.114205	0.347855	-4.77983	123	149	162	149
AC006547.13	-0.195841	2.86621	-1.31911	0.205251	0.478445	-5.35306	195	226	158	185
AC006946.16	-0.227558	1.90925	-1.14871	0.267153	0.545567	-5.25865	106	112	85	89
AC006978.6	0.0807642	1.97462	0.382379	0.707089	0.865722	-5.82966	88	119	105	98
AC007038.7	-0.333145	0.206376	-1.00159	0.331088	0.603325	-5.01195	37	32	23	28
AC007246.3	-0.021612	0.020443	-0.0569944	0.955238	0.9817	-5.38927	32	23	18	34
AC007318.5	-0.0562282	4.68385	-0.736864	0.471614	0.720893	-6.54017	728	683	623	647
AC007383.3	0.0874658	0.942291	0.317329	0.754997	0.889898	-5.55906	56	44	51	48
AC007405.6	-0.634927	1.05473	-2.17955	0.0441866	0.201995	-3.72777	62	78	31	55
AC007405.8	0.135296	0.372391	0.364539	0.720113	0.870516	-5.40983	45	24	25	45
AC007620.3	0.519779	3.47824	4.33534	0.000485035	0.00945324	-0.0214616	272	230	325	347
AC007969.5	0.241172	4.02617	1.88633	0.0770845	0.278037	-4.91997	388	422	362	545
AC008132.12	-0.223213	1.0099	-0.828094	0.419504	0.680269	-5.31139	52	65	44	49
AC008982.2	-0.0158	1.37065	-0.0627253	0.950743	0.980926	-5.71803	76	64	52	79
AC009005.2	-0.760436	1.64013	-2.96148	0.0090015	0.0739111	-2.47822	91	131	48	74
AC009061.1	-0.0349808	0.00832039	-0.0798137	0.937351	0.977014	-5.38544	42	17	32	19
AC009120.6	0.261383	0.842048	0.924824	0.368465	0.636407	-5.20028	50	38	47	51
AC009133.14	-0.192473	1.22564	-0.666577	0.51431	0.749872	-5.47322	59	75	70	43
AC009245.3	-0.216665	2.48799	-1.27285	0.220816	0.496726	-5.29201	154	172	114	149
AC009403.2	0.289703	2.33388	1.68126	0.111652	0.343727	-4.72079	116	129	136	144
AC009404.2	0.0135207	2.69914	0.0899059	0.929451	0.97427	-6.13503	174	173	163	165
AC009506.1	-0.525774	0.512776	-1.6865	0.110624	0.342096	-4.34964	52	40	28	31
AC009948.5	-0.0976951	3.54966	-0.862825	0.400674	0.666895	-6.05241	330	321	287	283
AC010525.6	0.144902	0.676918	0.499681	0.623936	0.822573	-5.42769	40	41	38	46
AC010536.1	0.284387	2.22234	1.54319	0.141857	0.395054	-4.87986	106	121	134	125
AC010642.1	-0.104125	1.15846	-0.409252	0.687649	0.855031	-5.58339	59	65	48	60
AC010761.13	0.484514	0.12234	1.40287	0.179301	0.446097	-4.6267	28	21	33	31
AC010761.8	0.336902	3.00737	2.40206	0.02847	0.155501	-3.73145	210	176	215	240
AC010976.2	0.0884217	0.255768	0.24455	0.809838	0.921341	-5.41579	24	39	36	26
AC011043.1	-0.133037	1.93333	-0.670146	0.51209	0.748481	-5.66988	101	114	86	97
AC011330.5	-0.596079	0.926402	-0.998467	0.332556	0.604935	-5.15193	25	157	28	52
AC011747.4	0.205799	0.411905	0.630158	0.537272	0.765461	-5.30452	27	40	35	36
AC012146.7	0.432939	1.47573	1.90336	0.0746934	0.273949	-4.20107	65	63	77	85
AC012314.8	0.464272	0.615805	1.40773	0.177882	0.444311	-4.69312	26	46	48	42
AC013394.2	-0.0278055	4.3927	-0.332846	0.743467	0.88369	-6.66205	558	584	504	544
AC013474.4	-0.596921	0.0977531	-1.65741	0.116438	0.351486	-4.34008	29	42	23	20
AC015849.19	-0.055248	1.81477	-0.26457	0.794636	0.91245	-5.8165	88	105	83	90
AC016292.3	-0.642192	0.0272044	-1.65339	0.11726	0.352575	-4.3381	29	39	27	15
AC016629.3	-0.562203	2.9994	-4.04371	0.00089976	0.0147758	-0.535236	257	265	168	163
AC016629.8	-0.156247	1.99143	-0.793846	0.43862	0.694929	-5.60144	104	122	89	100
AC016734.2	0.208192	2.89694	1.44743	0.166618	0.43113	-5.20338	182	191	181	223
AC016739.2	0.30546	2.38948	1.61497	0.125387	0.36556	-4.82905	132	122	118	180
AC016747.3	-0.0715302	2.4172	-0.421493	0.678867	0.850459	-5.95679	155	139	134	128
AC016757.3	-0.056273	3.00452	-0.371925	0.71471	0.868293	-6.17074	253	191	191	205
AC016773.1	-0.268433	2.10311	-1.18844	0.251584	0.530382	-5.27133	104	155	81	118
AC018720.10	0.141244	0.102192	0.343827	0.735344	0.879509	-5.358	17	43	25	31
AC018755.1	-0.203891	0.401499	-0.625689	0.540128	0.767543	-5.30377	34	42	25	37
AC018766.5	-0.162208	1.72937	-0.723641	0.47948	0.726467	-5.57387	108	82	69	89
AC018766.6	0.986613	-0.02055	2.65099	0.0171709	0.112817	-3.02308	24	14	34	35
AC018804.7	0.478406	0.0774044	1.12727	0.27585	0.554272	-4.88549	33	17	20	47
AC019097.7	0.0454202	0.276258	0.136378	0.893182	0.96004	-5.43808	27	37	30	31
AC022007.5	-0.0416111	0.763055	-0.145168	0.886347	0.956112	-5.55036	48	44	36	48
AC022400.1	-0.125659	0.237629	-0.372989	0.713933	0.867958	-5.37726	38	28	29	27
AC022431.1	-0.14255	3.1634	-1.11005	0.282986	0.562123	-5.6858	260	246	212	217
AC024560.3	-0.0247725	4.03648	-0.211991	0.834726	0.931768	-6.57402	392	507	381	439
AC024937.6	0.0568888	0.450577	0.167021	0.869395	0.948466	-5.47332	29	44	27	44
AC025171.1	-0.0743519	1.89045	-0.332934	0.743402	0.88369	-5.8199	124	84	81	101
AC025335.1	-0.0557475	4.06855	-0.598458	0.557709	0.777666	-6.42356	451	470	395	434
AC026271.5	0.28244	2.4538	1.71468	0.105234	0.331828	-4.70588	129	138	141	163
AC026740.1	-0.199444	1.02826	-0.757881	0.459273	0.710162	-5.36533	55	62	45	50
AC026806.2	0.21175	2.32797	1.21698	0.240832	0.519356	-5.30986	119	132	124	148
AC027307.3	1.23173	-0.337285	2.98358	0.00859298	0.071743	-2.60435	18	10	25	36
AC027601.1	0.00440539	0.926532	0.0159755	0.987447	0.995373	-5.60096	45	57	45	50
AC027612.1	0.170399	0.585888	0.553997	0.587055	0.796621	-5.38165	43	33	34	46
AC027612.6	0.0652303	2.48999	0.372	0.714655	0.868293	-6.00083	137	158	156	134
AC027763.2	-0.0374021	1.61282	-0.165577	0.870514	0.949185	-5.77641	92	75	67	85
AC046143.3	-0.598612	0.471316	-1.70384	0.10728	0.335149	-4.32279	36	57	34	23
AC069282.6	-0.416473	1.07406	-1.59375	0.130078	0.373738	-4.54937	68	62	47	44
AC069547.1	0.0784575	0.013048	0.195924	0.847076	0.937323	-5.37307	20	34	18	36
AC073046.25	0.653437	1.37984	2.60294	0.0189499	0.120834	-3.08164	65	47	86	78
AC073850.6	-0.18778	2.10809	-0.845	0.410268	0.673185	-5.59714	157	97	95	108
AC074117.10	0.0769506	3.3509	0.590381	0.562982	0.780176	-6.1829	282	254	229	302
AC074286.1	0.383403	0.526736	1.18466	0.253036	0.531187	-4.90841	43	26	40	42
AC074389.9	-0.0469709	3.4979	-0.370275	0.715915	0.868973	-6.34053	342	278	285	275
AC079250.1	0.156296	0.769375	0.504814	0.620404	0.820006	-5.44709	56	33	41	49
AC079466.1	0.113006	9.09242	4.46264	0.000371027	0.00774169	-1.00406	14108	14173	13672	14958
AC079807.2	-0.328996	1.58043	-1.47008	0.160461	0.422597	-4.80728	86	94	60	74
AC083799.1	0.107259	2.4148	0.642365	0.529513	0.760341	-5.84125	132	144	136	142
AC083843.1	0.154371	3.81714	1.53324	0.144278	0.399085	-5.38328	365	354	357	392
AC083899.3	0.0729115	2.279	0.399875	0.694408	0.85816	-5.92124	115	140	126	124
AC084018.1	-0.187232	3.94931	-1.6664	0.114612	0.34824	-5.23298	406	486	329	402
AC084125.4	0.32343	0.990365	1.16672	0.260005	0.538982	-5.0162	40	56	55	56
AC090587.2	-0.0381172	1.55422	-0.159593	0.87515	0.9514	-5.76013	77	83	58	90
AC090616.2	0.0808129	0.190366	0.238222	0.81466	0.922983	-5.40288	28	31	24	35
AC091729.9	0.171994	1.83142	0.840482	0.412723	0.675538	-5.51919	94	86	86	104
AC092171.4	-0.213874	3.3906	-1.73619	0.101272	0.324758	-4.94907	289	320	224	267
AC092295.7	0.626325	1.19925	2.48566	0.024059	0.140893	-3.26176	54	45	67	76
AC092811.1	-0.0648147	1.31785	-0.263362	0.795551	0.912909	-5.67228	76	61	62	60
AC093323.3	-0.00698209	4.40664	-0.0780661	0.93872	0.977895	-6.72153	616	531	520	546
AC093616.4	-0.256518	3.06447	-1.89098	0.0764246	0.276944	-4.61042	260	232	191	194
AC093627.9	0.150742	0.658353	0.476453	0.640037	0.830414	-5.43339	51	31	43	40
AC093642.5	-0.095826	0.333773	-0.290769	0.774873	0.901006	-5.4218	40	30	26	35
AC093838.4	0.0182475	5.00812	0.260986	0.797352	0.914131	-6.89452	901	822	794	838
AC104135.3	-0.0883154	4.19339	-0.985612	0.33864	0.610546	-6.15838	526	490	426	468
AC108463.1	-0.160318	0.0270444	-0.432049	0.671332	0.847191	-5.3132	31	26	30	19
AC108463.2	-0.467759	1.11464	-1.81151	0.0884129	0.301551	-4.269	68	68	48	44
AC108488.4	0.339054	0.739068	1.09382	0.289839	0.567434	-5.0337	50	31	50	44
AC109309.4	-1.35201	0.87477	-4.77656	0.00019276	0.00477668	0.422433	77	80	26	31
AC110781.3	-0.352055	1.77474	-1.66851	0.114189	0.347855	-4.59355	112	96	70	82
AC113189.5	-0.211611	3.50399	-1.80756	0.0890497	0.302813	-4.87605	323	333	271	260
AC118138.2	-0.121696	-0.08235	-0.334782	0.742032	0.882945	-5.32234	25	27	25	20
AC125232.1	-0.200659	3.01378	-1.3305	0.201555	0.473474	-5.38546	220	245	207	174
AC129492.6	0.211676	0.303777	0.631424	0.536464	0.764662	-5.28119	25	37	31	35
AC132216.1	0.436491	1.41237	1.81246	0.0882604	0.301353	-4.31983	56	67	68	88
AC133528.2	0.0305811	1.77177	0.148322	0.883897	0.955553	-5.82701	90	91	84	89
AC137932.1	0.179534	0.996327	0.637506	0.532594	0.76211	-5.43386	41	61	51	55
AC137932.5	-0.0072856	1.24104	-0.0289709	0.977237	0.989964	-5.6837	58	69	61	57
AC138035.2	0.338026	0.431867	1.04063	0.313146	0.589246	-5.02149	28	36	42	34
AC138123.2	0.343569	0.658157	0.98528	0.338798	0.610616	-5.1118	37	37	62	32
AC139100.2	0.0827416	-0.145219	0.209354	0.83675	0.93235	-5.33842	18	30	18	29
AC141586.5	0.419166	2.60196	2.68418	0.0160369	0.108206	-3.12073	147	135	172	181
AC144521.1	0.128628	0.78232	0.443183	0.663423	0.843081	-5.47632	49	39	48	42
AC144530.1	0.692443	1.92035	3.10683	0.00662567	0.0605727	-2.23589	68	94	102	142
AC144652.1	-0.37892	0.887213	-1.34202	0.197872	0.46971	-4.8117	51	62	43	38
AC147651.4	-0.192063	2.62219	-1.20822	0.244096	0.521951	-5.4069	180	173	151	139
AC156455.1	0.0946858	2.05059	0.496451	0.626164	0.823158	-5.80498	113	102	109	106
AC159540.1	-0.0698673	4.03336	-0.690082	0.499791	0.740384	-6.3515	488	417	395	410
ACAA1	0.0157303	5.05147	0.225473	0.824397	0.927913	-6.91782	860	916	830	850
ACAA2	-0.14935	5.96844	-2.54175	0.0214707	0.131634	-4.36253	1750	1798	1533	1466
ACACA	0.0795434	6.67473	1.91512	0.073081	0.271139	-5.68901	2744	2610	2571	2723
ACACB	-0.39511	2.74463	-2.41804	0.0275719	0.152714	-3.63267	187	229	130	165
ACAD10	-0.093344	4.22018	-0.967131	0.347523	0.61799	-6.18519	562	477	445	464
ACAD8	0.0157702	5.02964	0.236535	0.815946	0.923594	-6.90793	891	859	782	874
ACAD9	0.00484057	6.05439	0.090151	0.929259	0.97427	-7.25776	1725	1853	1566	1793
ACADM	0.0318723	6.63709	0.727493	0.477181	0.724938	-7.15302	2755	2552	2408	2668
ACADS	-0.12033	4.30657	-1.24972	0.228942	0.50557	-5.9104	540	569	501	457
ACADSB	0.0248314	5.40238	0.422658	0.678033	0.85011	-6.96478	1123	1135	1037	1113
ACADVL	-0.0690921	7.63522	-2.06378	0.0552314	0.229407	-5.64917	5543	5425	4778	5006
ACAP1	-0.773411	1.0121	-2.76126	0.0136739	0.0972287	-2.80408	62	80	41	36
ACAP2	-0.00339171	6.48409	-0.0749142	0.941189	0.978255	-7.38348	2349	2481	2155	2353
ACAP2-IT1	-0.536424	-0.0805668	-1.2237	0.238355	0.516437	-4.77368	25	37	11	33
ACAP3	-0.31885	5.90834	-5.31949	6.36155e-05	0.0020716	1.43082	1717	1903	1266	1447
ACAT1	0.00949356	6.9554	0.243174	0.810886	0.92193	-7.47773	3363	3303	2937	3347
ACAT2	0.15598	6.79812	3.71292	0.00182173	0.0246908	-2.18549	2947	2735	2867	3055
ACBD3	0.109253	5.42938	1.66869	0.114153	0.347855	-5.71323	1110	1122	1149	1108
ACBD4	-0.11131	2.51849	-0.681524	0.505049	0.742799	-5.84793	152	168	139	138
ACBD5	0.232922	4.69769	3.02497	0.00787576	0.0677898	-3.02359	659	631	653	767
ACBD6	0.083137	5.7346	1.53799	0.143119	0.397498	-5.9991	1401	1384	1359	1403
ACBD7	-0.028375	1.27523	-0.114185	0.910477	0.966778	-5.68721	67	64	51	70
ACCS	-0.301873	3.16452	-2.3254	0.0331743	0.169542	-3.90828	263	273	186	221
ACD	-0.0583378	5.29849	-0.855951	0.404356	0.669401	-6.64712	1141	1023	969	975
ACER2	-0.000984031	2.29604	-0.00460899	0.996378	0.998796	-6.00589	168	103	127	120
ACER3	-0.0165406	4.14687	-0.18152	0.858183	0.942946	-6.61809	468	491	431	456
ACHE	-0.606517	3.88131	-5.66348	3.20924e-05	0.00126888	2.55159	510	468	310	292
ACIN1	-0.0306504	7.97728	-0.991176	0.335997	0.608254	-7.21217	6982	6740	6067	6504
ACLY	0.0435811	8.8748	1.67754	0.112387	0.345093	-6.49637	12531	12383	11451	12587
ACN9	0.150631	4.97378	1.94448	0.0691913	0.263457	-5.13321	748	862	807	861
ACO1	-0.0639881	6.63406	-1.5151	0.148779	0.405846	-6.29131	2786	2687	2296	2606
ACO2	-0.0856913	7.39694	-2.53895	0.0215932	0.132124	-4.72958	4704	4649	3967	4282
ACOT1	0.699688	0.703154	2.34601	0.0318424	0.165166	-3.45287	34	34	43	62
ACOT13	0.0144375	5.0143	0.180891	0.85867	0.942981	-6.91508	820	912	839	799
ACOT2	-0.0318382	5.01638	-0.46286	0.649546	0.835484	-6.8208	874	887	801	812
ACOT7	-0.149264	5.76653	-2.77029	0.01342	0.0959178	-3.85602	1594	1495	1250	1356
ACOT8	-0.228692	3.83936	-2.28135	0.0361965	0.177648	-4.18648	417	417	316	350
ACOT9	-0.156706	4.95923	-1.90227	0.0748437	0.274118	-5.19605	966	808	737	748
ACOX1	-0.26302	5.69781	-4.61883	0.000267563	0.0060976	0.0327022	1492	1573	1120	1270
ACOX3	-0.122294	3.52763	-0.96219	0.349926	0.620264	-5.95554	365	287	261	296
ACP1	-0.00829992	7.08756	-0.230348	0.82067	0.925733	-7.5116	3702	3646	3282	3556
ACP2	0.0653742	4.28575	0.645354	0.527623	0.759294	-6.4685	475	553	518	488
ACP6	0.237527	0.517054	0.724918	0.478717	0.726117	-5.27184	32	38	47	32
ACPP	0.158143	4.13567	1.74434	0.0998063	0.322099	-5.17854	455	441	439	497
ACPT	0.532326	0.569199	1.6621	0.115481	0.349854	-4.38804	38	28	51	39
ACRC	0.276736	0.78961	0.958605	0.351676	0.622211	-5.16162	45	39	40	56
ACSBG1	-0.292465	5.84899	-5.58374	3.75587e-05	0.00144363	1.98067	1752	1683	1285	1340
ACSF2	-0.407633	-0.0651975	-1.04333	0.31193	0.587918	-4.93295	29	29	28	15
ACSF3	-0.0736104	4.52661	-0.931259	0.365225	0.6344	-6.32339	651	622	546	586
ACSL1	0.116831	4.4493	1.44472	0.167369	0.431959	-5.71273	567	562	557	589
ACSL3	0.0469951	6.31598	0.928081	0.366823	0.635072	-6.8956	2216	2009	2005	2077
ACSL4	0.0441093	6.91682	1.12554	0.276561	0.554775	-6.85451	3275	3138	2916	3274
ACSL5	-0.205553	2.43952	-1.20032	0.247063	0.524932	-5.35966	147	166	131	123
ACSM3	-0.331211	3.44382	-2.65984	0.0168613	0.111347	-3.37049	306	353	224	265
ACSS1	-0.269189	6.2467	-5.96283	1.79146e-05	0.000791495	2.63575	2255	2235	1678	1809
ACSS2	-0.285518	5.22403	-4.51951	0.000329312	0.0070007	-0.0472866	1136	1086	830	876
ACTB	-0.0573717	11.9266	-3.0217	0.00793027	0.0678996	-4.46939	106367	107615	90894	101665
ACTG1	0.0758006	10.0167	3.40906	0.0034857	0.0390451	-3.38682	27178	27186	25878	27744
ACTG1P3	-0.733254	-0.1194	-2.02239	0.0597555	0.240086	-3.87998	33	30	17	18
ACTL10	-0.128268	1.09264	-0.494918	0.627222	0.823494	-5.5306	58	61	53	49
ACTL6A	0.0334999	7.034	0.815769	0.426321	0.686037	-7.18237	3527	3448	3328	3355
ACTL8	-0.0748041	3.36158	-0.624275	0.541034	0.768352	-6.16508	280	287	250	254
ACTN1	-0.234647	3.49224	-2.02568	0.0593847	0.239293	-4.52144	316	341	254	268
ACTN2	-0.0168974	2.9546	-0.117254	0.908083	0.965933	-6.21745	230	191	182	206
ACTN4	-0.172814	8.7102	-6.39177	7.93389e-06	0.000416178	3.00064	12057	11898	9636	10251
ACTR10	-0.151533	5.10741	-2.18814	0.0434543	0.200254	-4.75484	1008	951	754	898
ACTR1A	-0.0236605	6.58371	-0.577055	0.571738	0.785713	-7.23934	2629	2580	2312	2484
ACTR1B	-0.0452409	5.47075	-0.771274	0.451513	0.705187	-6.77201	1206	1219	1081	1119
ACTR2	0.0307529	8.8458	1.09704	0.288468	0.5663	-7.25211	12368	12153	11481	11959
ACTR3	-0.00130867	8.03432	-0.0412879	0.967565	0.986962	-7.72691	6975	7155	6401	6809
ACTR3B	0.216037	4.08394	2.35331	0.031383	0.164119	-4.13413	427	420	436	485
ACTR3C	-0.254662	1.35848	-1.03241	0.316865	0.592095	-5.22698	81	69	64	54
ACTR5	0.109761	4.8336	1.42724	0.17227	0.437905	-5.86481	790	691	715	778
ACTR6	0.0721504	4.58037	0.85875	0.402854	0.668283	-6.4074	671	587	609	627
ACTR8	0.231199	5.04453	3.45293	0.00317427	0.0366037	-2.24598	809	832	849	954
ACTRT3	0.00772149	0.0777635	0.0206995	0.983735	0.993603	-5.40268	37	21	22	31
ACVR1B	-0.134811	4.87948	-1.8815	0.0777739	0.279145	-5.20462	819	843	659	758
ACVR2A	0.0138028	1.88584	0.0665806	0.94772	0.979777	-5.87083	104	93	100	87
ACVR2B	-0.108661	3.33747	-0.858266	0.403114	0.668419	-5.98391	297	269	218	274
ACY1	0.142739	2.1957	0.772012	0.451088	0.704878	-5.68249	110	124	125	117
ACYP1	0.0811885	2.58417	0.519373	0.610438	0.812466	-5.9662	160	153	153	157
ACYP2	-0.235785	0.990468	-0.83071	0.418066	0.679272	-5.30487	50	66	51	41
AD000090.2	0.0578091	4.78212	0.737003	0.471532	0.720893	-6.57421	760	692	712	703
AD000092.3	0.0540373	-0.0102746	0.148424	0.883818	0.955553	-5.37509	23	29	20	31
ADAL	0.195806	4.08406	2.05784	0.0558609	0.230711	-4.65503	442	412	420	496
ADAM10	-0.038246	6.10645	-0.769022	0.452812	0.706085	-6.97052	1953	1810	1647	1781
ADAM15	-0.11164	6.47209	-2.5641	0.0205151	0.127475	-4.46239	2532	2438	2100	2205
ADAM17	0.0846024	5.02743	1.06063	0.304229	0.581614	-6.36516	789	923	788	906
ADAM1A	0.0736161	2.5262	0.454488	0.655435	0.838624	-5.97872	161	141	146	151
ADAM22	0.0378347	3.89808	0.33119	0.744695	0.884166	-6.49337	365	431	337	427
ADAM32	-0.107763	1.58775	-0.490557	0.630238	0.82462	-5.66697	84	83	72	73
ADAM8	-0.437713	2.50949	-2.61416	0.0185193	0.118698	-3.22617	169	187	127	119
ADAM9	-0.0392081	5.75237	-0.706761	0.489635	0.733623	-6.9095	1446	1496	1324	1356
ADAMTS19	0.259728	1.89192	1.3032	0.210503	0.484717	-5.08664	95	87	95	109
ADAMTS3	-0.10696	5.23561	-1.62729	0.12273	0.361322	-5.71259	1070	1034	918	912
ADAMTS6	0.189946	0.427974	0.585103	0.566441	0.781841	-5.33146	40	28	31	41
ADAMTSL4	-0.678924	4.2871	-7.70857	7.61178e-07	6.84785e-05	6.16834	665	664	385	392
ADAMTSL5	-0.504707	4.0039	-4.10563	0.00078881	0.0134293	-0.593365	451	587	324	354
ADAR	-0.0239442	8.341	-0.83742	0.414392	0.677206	-7.41875	8888	8729	7707	8514
ADARB1	0.0318717	5.40861	0.539069	0.597081	0.803464	-6.90869	1160	1103	1038	1127
ADAT1	0.114633	4.39398	1.36657	0.190202	0.460483	-5.79654	539	548	545	557
ADAT2	-0.00124409	6.76557	-0.0293866	0.976911	0.989964	-7.46144	2977	2890	2544	2947
ADAT3	-0.271301	2.80005	-1.7675	0.09574	0.314614	-4.72306	223	189	163	156
ADCK1	-0.0592981	4.31966	-0.644859	0.527936	0.759481	-6.47978	516	584	462	524
ADCK2	-0.0614032	3.73151	-0.547148	0.591644	0.799411	-6.33822	375	354	342	314
ADCK3	0.106329	6.41781	2.29177	0.0354592	0.176088	-4.96182	2190	2247	2211	2260
ADCK4	-0.198493	4.9346	-2.85474	0.0112566	0.0853233	-3.436	884	881	671	769
ADCK5	-0.152238	3.9745	-1.58842	0.13128	0.376667	-5.3552	440	452	359	392
ADCY10P1	-0.178106	2.11952	-0.971949	0.345192	0.615565	-5.4925	125	123	99	106
ADCY3	-0.206034	5.40552	-3.18497	0.00561499	0.0540807	-2.90662	1232	1217	1011	979
ADCY7	-0.0722959	7.06258	-1.7408	0.100441	0.323136	-6.06274	3571	3818	3133	3441
ADD1	-0.128287	7.80615	-3.80589	0.00149368	0.0214043	-2.19384	6370	6240	5041	5766
ADD2	-0.0758954	8.98892	-2.96456	0.00894353	0.07363	-4.16299	14204	13899	12020	12933
ADD3	-0.286884	3.66749	-2.67621	0.0163024	0.109166	-3.40287	373	382	282	297
ADH5	0.132898	6.93489	3.17638	0.00571822	0.0549471	-3.34855	3161	3130	3216	3242
ADI1	-0.0603852	6.93372	-1.59514	0.129765	0.373011	-6.25243	3342	3383	2900	3136
ADIPOR1	-0.0896358	6.42122	-2.00869	0.0613252	0.24418	-5.46283	2454	2310	2005	2184
ADIPOR2	-0.12565	7.34622	-3.64649	0.0020995	0.0273221	-2.44632	4641	4515	3788	4066
ADIRF-AS1	-0.0594121	3.48495	-0.469696	0.644756	0.833237	-6.29329	335	281	286	267
ADK	0.0264525	6.07935	0.55109	0.589001	0.797825	-7.11067	1785	1824	1655	1785
ADM2	0.130918	1.28914	0.472181	0.643018	0.832432	-5.59299	48	81	66	62
ADM5	0.368468	2.63116	2.3552	0.0312653	0.163919	-3.71959	155	138	176	178
ADNP	0.0596328	7.2393	1.65421	0.117092	0.35245	-6.23442	3994	3981	3660	4123
ADNP2	0.0794431	6.38499	1.83432	0.0848122	0.29453	-5.74224	2197	2183	2063	2269
ADO	0.0475574	4.85552	0.558308	0.584176	0.793929	-6.71725	848	693	704	780
ADORA2B	-0.183382	4.45802	-2.20981	0.0416562	0.194861	-4.50836	654	607	510	529
ADPGK	0.121843	6.04386	2.36569	0.0306181	0.162673	-4.71914	1699	1710	1601	1874
ADPRHL2	-0.0604449	5.17752	-0.898304	0.382021	0.648809	-6.57088	1041	950	878	908
ADPRM	-0.104882	2.75832	-0.715979	0.484074	0.730494	-5.90197	189	188	158	170
ADRBK1	-0.0707983	6.94391	-1.89876	0.075333	0.274701	-5.78243	3420	3377	2911	3146
ADRBK2	0.00123052	5.73752	0.0222935	0.982483	0.992757	-7.16434	1398	1476	1281	1410
ADRM1	-0.0166299	6.83114	-0.35553	0.726724	0.874797	-7.41172	3161	3005	2879	2829
ADSL	0.0355819	7.81938	1.04455	0.311384	0.587468	-7.12898	5900	6120	5606	5921
ADSS	0.114079	6.3853	2.40643	0.0282216	0.155031	-4.74015	2102	2227	2140	2243
AEBP2	0.142614	5.40022	2.28127	0.0362022	0.177648	-4.67984	1056	1108	1108	1128
AEN	-0.0574104	6.5617	-1.29394	0.213611	0.487676	-6.56486	2684	2508	2276	2392
AES	-0.0832834	6.91017	-2.00983	0.0611934	0.243812	-5.58813	3468	3206	2810	3083
AF129075.5	-0.470326	0.380248	-1.28046	0.218196	0.493736	-4.78766	48	35	18	41
AF131215.2	0.0580888	3.45313	0.462192	0.650015	0.835484	-6.28654	267	313	254	310
AF131215.3	0.620124	-0.0844258	1.66655	0.114583	0.348236	-4.31464	16	25	27	31
AF131215.5	1.08936	-0.0746707	2.78072	0.0131324	0.094525	-2.845	24	12	36	33
AF131215.9	0.0683449	2.1193	0.368151	0.717468	0.869621	-5.88115	118	110	101	123
AF230666.2	-0.178284	1.62136	-0.778805	0.447185	0.702227	-5.50449	77	100	67	78
AFF1	0.114281	8.35394	4.00096	0.000985435	0.015786	-1.87333	8512	8432	8150	9021
AFF4	-0.0447685	6.28207	-0.887646	0.387562	0.653484	-6.92228	2078	2178	1923	1939
AFG3L1P	0.0696871	5.0971	1.01451	0.325071	0.598719	-6.43502	882	919	814	956
AFG3L2	-0.0254382	6.35021	-0.517358	0.611813	0.813326	-7.20821	2168	2264	2027	2049
AFMID	0.138183	5.01301	2.05632	0.0560232	0.230875	-4.95732	822	836	805	903
AFTPH	-0.00815842	5.43321	-0.116553	0.908629	0.965973	-7.06092	1138	1193	1122	1052
AGA	0.218453	3.74793	2.03028	0.0588687	0.238141	-4.59572	350	320	367	363
AGAP1	-0.075642	5.71851	-1.30129	0.211142	0.485072	-6.30844	1509	1406	1192	1398
AGAP2	-0.125108	3.02076	-0.881308	0.390883	0.657028	-5.85846	249	208	195	196
AGAP3	0.0922015	6.37532	1.91439	0.0731805	0.271139	-5.60908	2118	2212	2139	2181
AGAP4	-0.0623952	2.84437	-0.321891	0.751601	0.887998	-6.13431	208	189	129	239
AGAP6	0.0695296	5.30906	1.10749	0.284059	0.563178	-6.40585	1083	1003	968	1080
AGAP9	-0.0111329	3.00086	-0.0816584	0.935907	0.976613	-6.2368	209	223	197	204
AGBL3	0.338005	0.581562	1.02288	0.321215	0.595474	-5.06511	48	26	39	45
AGBL5	0.0991611	4.93903	1.39525	0.181545	0.448701	-5.94176	815	780	797	803
AGER	-0.465283	2.01544	-2.15962	0.0459305	0.205932	-3.90738	113	143	97	77
AGFG1	0.00177131	6.67732	0.0415097	0.967391	0.986947	-7.43784	2802	2706	2547	2615
AGFG2	-0.483649	3.9564	-4.78262	0.000190352	0.00472954	0.802633	522	467	323	338
AGGF1	0.0219866	5.85669	0.419659	0.68018	0.850637	-7.10951	1537	1562	1377	1569
AGK	-0.0128492	5.56447	-0.206849	0.838674	0.933171	-7.08748	1223	1339	1162	1212
AGL	0.0802727	6.0308	1.56899	0.135738	0.384481	-6.04488	1783	1644	1636	1753
AGMAT	0.161335	3.69599	1.52856	0.145427	0.401129	-5.35015	329	330	338	352
AGO1	0.185847	5.29627	2.99025	0.00847321	0.071139	-3.27474	997	986	1042	1070
AGO2	-0.0745311	6.36807	-1.60375	0.12785	0.369991	-6.09122	2231	2335	1976	2081
AGO3	0.0538605	4.98251	0.740653	0.469375	0.719329	-6.63854	844	825	824	800
AGO4	0.0171084	3.7079	0.120731	0.905371	0.964822	-6.47683	292	419	310	352
AGPAT1	-0.223583	5.98749	-4.43139	0.00039621	0.00811488	-0.442055	1903	1791	1425	1535
AGPAT2	-0.274384	4.54609	-3.47068	0.00305628	0.0357286	-2.05996	703	681	502	569
AGPAT3	-0.0850555	7.83151	-2.73823	0.0143424	0.100674	-4.4225	6341	6297	5368	5783
AGPAT5	0.00392401	8.20227	0.127914	0.899772	0.962502	-7.74941	8092	7755	7222	7646
AGPAT6	0.0950048	6.46259	2.0612	0.0555042	0.230155	-5.38504	2248	2352	2151	2448
AGPAT9	-0.563723	-0.0177041	-1.3399	0.198547	0.470548	-4.67121	37	27	31	13
AGPS	0.000253738	7.41651	0.00677169	0.994679	0.998216	-7.60986	4728	4475	4235	4377
AGRN	-0.855563	7.08134	-22.2762	1.08186e-13	4.4771e-10	21.7026	5016	4798	2463	2612
AGTPBP1	0.143994	5.66141	2.46255	0.025209	0.145028	-4.42324	1309	1282	1346	1336
AGTRAP	-0.227094	5.45917	-3.81312	0.0014708	0.0211342	-1.60511	1301	1264	952	1100
AHCTF1	0.107259	7.49182	3.15657	0.00596347	0.0563387	-3.50737	4771	4574	4502	4919
AHCTF1P1	0.210427	3.79982	2.0018	0.0621289	0.246332	-4.65957	370	328	355	400
AHCY	-0.0300266	8.62505	-1.02903	0.318402	0.593065	-7.2873	10870	10620	9655	10040
AHCYL1	0.0485638	7.17074	1.34449	0.197091	0.468996	-6.65107	3889	3745	3518	3872
AHCYL2	0.0184897	3.4204	0.146309	0.88546	0.955708	-6.37347	282	289	288	256
AHDC1	-0.383356	4.14816	-4.05315	0.000881869	0.0145012	-0.73909	569	521	391	391
AHI1	-0.0252643	4.79531	-0.307022	0.76269	0.894634	-6.80934	801	708	706	682
AHNAK	-0.806155	7.73332	-24.6134	2.20291e-14	2.73491e-10	23.3039	7562	7600	3839	4279
AHNAK2	-2.01093	2.21261	-9.34047	5.68388e-08	8.82067e-06	7.18537	230	271	63	53
AHR	0.285012	2.8138	1.90703	0.0741862	0.272653	-4.51527	179	164	174	218
AHRR	-0.292392	1.39618	-1.25122	0.228407	0.505339	-5.01785	77	79	56	63
AHSA1	0.111323	7.28821	3.12211	0.00641491	0.0592568	-3.53823	4117	3984	3985	4204
AHSA2	0.0517006	5.56831	0.932856	0.364424	0.633481	-6.66471	1256	1254	1169	1266
AHSP	-0.0150944	7.4131	-0.401654	0.693124	0.857606	-7.52418	4789	4448	4052	4501
AIDA	-0.182582	6.18954	-3.22573	0.00514966	0.0510647	-3.0502	2027	2168	1567	1896
AIFM1	0.00718903	6.51367	0.166584	0.869733	0.948585	-7.37995	2480	2428	2264	2353
AIFM2	-0.278836	4.56534	-3.14595	0.00609921	0.0571484	-2.73427	758	651	498	587
AIG1	-0.101418	3.55981	-0.903901	0.379133	0.646244	-6.01999	320	337	282	291
AIM1	0.120092	8.79093	4.08674	0.00082111	0.0137572	-1.76119	11815	11087	11104	12186
AIMP1	-0.00724587	6.11742	-0.153138	0.880158	0.953505	-7.26833	1880	1870	1648	1845
AIMP2	-0.0192173	5.59092	-0.324256	0.749842	0.887394	-7.06305	1259	1356	1163	1250
AIP	-0.152486	4.98936	-1.97577	0.065252	0.254414	-5.08426	863	940	773	746
AJUBA	0.44452	0.954273	1.53063	0.144917	0.400167	-4.60771	35	56	53	60
AK1	0.181504	1.36885	0.764411	0.45548	0.707708	-5.44759	69	61	63	75
AK2	0.1122	8.44552	4.01613	0.00095413	0.0154038	-1.85612	9110	8955	8815	9459
AK3	-0.00842286	5.89747	-0.165055	0.870918	0.949376	-7.19994	1590	1631	1422	1575
AK4	0.0334831	7.05497	0.880461	0.391328	0.657164	-7.13168	3636	3446	3277	3505
AK4P1	-0.00251047	1.69182	-0.0110781	0.991295	0.996824	-5.81325	99	76	70	93
AK4P3	0.3752	0.403018	1.0995	0.287428	0.565339	-4.96491	41	23	38	37
AK9	-0.420794	1.79013	-2.02122	0.059889	0.240233	-4.08156	113	102	69	81
AKAP1	0.0549602	6.94129	1.3865	0.184152	0.45156	-6.54448	3219	3279	2959	3362
AKAP10	-0.0561364	4.8858	-0.807034	0.431194	0.689771	-6.55357	808	815	705	756
AKAP11	0.0465747	6.80056	1.19498	0.249088	0.527461	-6.74706	2939	2970	2737	2975
AKAP13	0.0201128	4.2583	0.206052	0.839286	0.933171	-6.65155	471	556	458	513
AKAP17A	-0.0135707	6.0113	-0.281173	0.782094	0.905253	-7.20743	1754	1737	1544	1693
AKAP5	0.0339138	0.473659	0.110681	0.913213	0.967971	-5.48552	37	36	32	38
AKAP6	0.221549	1.1614	0.771796	0.451212	0.704895	-5.38937	42	73	55	66
AKAP8	0.068288	6.70433	1.63909	0.120231	0.357011	-6.13097	2824	2665	2551	2835
AKAP8L	-0.170585	7.00639	-4.09531	0.000806292	0.0136308	-1.41646	3593	3754	3011	3097
AKAP9	0.0579694	6.16206	1.00578	0.329129	0.601965	-6.77594	2001	1788	1684	2008
AKIP1	0.0481105	4.14208	0.49625	0.626303	0.823158	-6.50648	439	497	445	459
AKIRIN1	-0.0706906	6.46029	-1.64262	0.119492	0.355816	-6.05954	2431	2431	2045	2289
AKIRIN2	-0.0702313	5.72668	-1.29039	0.214811	0.489066	-6.32457	1506	1417	1261	1344
AKNA	0.0322289	2.78102	0.216215	0.831486	0.930588	-6.14264	174	192	161	189
AKR1A1	0.0454155	5.93432	0.896843	0.382777	0.649401	-6.81144	1634	1607	1536	1595
AKR1B1	0.0344087	3.08709	0.257247	0.800187	0.915606	-6.23587	228	224	195	239
AKR1C1	-0.208899	0.513586	-0.675334	0.508873	0.746151	-5.30006	37	45	34	32
AKR1C3	0.114116	0.930737	0.414609	0.6838	0.852947	-5.52372	51	47	42	58
AKR1E2	-0.152154	1.72256	-0.688057	0.501032	0.740847	-5.59569	96	90	87	71
AKR7A2	-0.0754024	5.20301	-1.0502	0.308854	0.58505	-6.43185	961	1080	844	966
AKR7A2P1	0.0461671	0.0286858	0.128577	0.899255	0.962187	-5.38555	28	25	30	22
AKR7A3	-0.382039	1.44001	-1.56254	0.137246	0.387428	-4.65977	73	94	62	57
AKT1	0.0134826	6.91803	0.35344	0.728261	0.875797	-7.43427	3297	3187	2962	3163
AKT1S1	-0.00334641	6.66117	-0.0815859	0.935963	0.976613	-7.43099	2700	2758	2460	2636
AKT2	-0.0634159	7.78064	-1.86326	0.0804315	0.284976	-6.01388	6143	5971	5066	5793
AKTIP	-0.539671	0.814611	-1.88473	0.0773122	0.278365	-4.12718	56	57	40	33
AL031320.1	0.0392654	3.18304	0.283643	0.780233	0.904275	-6.26134	261	223	203	263
AL049840.1	0.265722	0.727702	0.906764	0.377661	0.645036	-5.18976	36	45	40	51
AL136419.6	-0.278662	0.0640317	-0.803966	0.432915	0.690827	-5.1307	32	29	25	22
AL357673.1	-0.0785518	3.20394	-0.603066	0.554713	0.77597	-6.12433	252	258	201	252
AL590431.1	0.854428	0.182459	2.50898	0.0229489	0.137161	-3.21282	26	19	36	40
AL591025.1	-0.287585	0.613193	-0.886376	0.388226	0.65389	-5.17992	38	53	41	29
AL592188.7	0.548171	1.8106	2.02485	0.059478	0.239577	-4.08089	110	55	88	128
AL627309.1	-0.314301	0.606345	-1.02554	0.319998	0.594194	-5.06656	40	51	36	32
AL773604.8	0.176871	-0.0431554	0.486132	0.633304	0.826257	-5.27916	20	29	25	26
AL807752.1	0.106188	-0.345417	0.229421	0.821378	0.926196	-5.29552	14	28	29	14
ALAD	-0.258194	6.2708	-5.72343	2.85288e-05	0.00115747	2.15435	2270	2278	1720	1839
ALAS1	-0.086486	5.43431	-1.45803	0.163715	0.426996	-6.01534	1235	1165	1024	1091
ALAS2	-0.103001	6.644	-2.42532	0.0271717	0.151747	-4.77322	2777	2804	2393	2471
ALCAM	-0.12632	2.63094	-0.657731	0.519836	0.753328	-5.89977	141	214	152	146
ALDH16A1	-0.0269753	6.89154	-0.650595	0.524318	0.756731	-7.27227	3291	3163	2935	2994
ALDH18A1	0.0156162	7.67285	0.466464	0.647019	0.834495	-7.546	5602	5334	4993	5351
ALDH1A1	-0.136451	0.388026	-0.434697	0.669447	0.846181	-5.38836	38	35	29	33
ALDH1B1	0.12595	6.55901	3.03256	0.0077508	0.067244	-3.55182	2470	2393	2367	2600
ALDH3A2	-0.0229119	4.72913	-0.293125	0.773103	0.900282	-6.79099	761	681	622	705
ALDH3B1	-0.429715	5.3677	-7.14635	2.01225e-06	0.000142755	5.0649	1317	1264	864	929
ALDH4A1	-0.0998668	5.43623	-1.64386	0.119234	0.355583	-5.7514	1255	1160	1024	1084
ALDH5A1	-0.0596589	6.66977	-1.48868	0.155546	0.414844	-6.33768	2831	2768	2418	2610
ALDH6A1	-0.150179	4.44992	-1.76446	0.0962663	0.315288	-5.2487	632	609	474	574
ALDH9A1	-0.108476	5.61979	-1.9574	0.0675399	0.2596	-5.31286	1357	1393	1148	1239
ALDOA	-0.0483048	9.89214	-2.07804	0.0537465	0.226064	-5.99242	26313	25755	22293	24855
ALDOC	-0.054673	3.30997	-0.396172	0.697084	0.859859	-6.26538	274	268	270	223
ALG1	-0.0129164	5.40278	-0.164108	0.871651	0.949675	-7.04415	1157	1127	1134	996
ALG10	-0.0327833	3.02207	-0.241774	0.811952	0.922338	-6.21742	232	210	197	207
ALG10B	-0.0313542	3.06048	-0.233764	0.818061	0.924217	-6.23235	234	220	190	226
ALG11	0.0619138	4.18493	0.698984	0.494355	0.736551	-6.39757	485	473	453	483
ALG12	-0.0521198	3.43336	-0.442934	0.6636	0.843081	-6.28792	310	282	261	273
ALG13	-0.0678103	5.1974	-1.06308	0.303146	0.580616	-6.41672	1041	983	857	950
ALG14	-0.0514567	3.58321	-0.453376	0.656218	0.83869	-6.33506	340	316	300	293
ALG1L13P	0.478268	2.32738	2.67517	0.0163373	0.109334	-3.08197	107	122	132	167
ALG1L6P	0.0263934	3.03947	0.178641	0.860407	0.943602	-6.23718	245	195	215	203
ALG1L9P	-0.802791	0.0410966	-2.22081	0.0407693	0.192234	-3.62048	37	35	23	16
ALG2	0.214474	5.23607	3.31476	0.00426148	0.0447154	-2.58982	973	911	1009	1037
ALG3	0.0162806	6.6648	0.398629	0.695308	0.85893	-7.35193	2778	2658	2463	2682
ALG5	0.0509297	5.13043	0.710886	0.487142	0.73235	-6.70889	918	933	919	879
ALG6	-0.0596617	4.42201	-0.706245	0.489947	0.733738	-6.47273	587	590	531	527
ALG8	0.0583764	5.83123	1.12691	0.275997	0.554272	-6.5489	1493	1513	1384	1546
ALG9	0.0362655	3.14866	0.283456	0.780374	0.904297	-6.24971	233	238	214	238
ALG9	0.0362655	3.14866	0.283456	0.780374	0.904297	-6.24971	0	0	0	0
ALKBH1	0.0218838	4.32194	0.257126	0.800279	0.915627	-6.66116	543	526	476	540
ALKBH2	0.169749	5.36686	2.45262	0.0257189	0.147075	-4.352	998	1098	1110	1096
ALKBH3	0.0685161	4.99844	0.849256	0.407964	0.670962	-6.55644	916	772	758	895
ALKBH4	0.00328675	4.23851	0.0368267	0.971068	0.988004	-6.66615	506	508	476	476
ALKBH5	-0.108452	6.27263	-2.42883	0.0269804	0.151178	-4.66545	2177	2147	1800	1954
ALKBH6	0.0345072	1.71265	0.160681	0.874307	0.951218	-5.80721	92	82	74	93
ALKBH7	-0.09175	4.76735	-1.11544	0.280739	0.559833	-6.21946	710	806	659	670
ALKBH8	0.217902	4.73766	2.64378	0.0174272	0.11383	-3.79189	720	615	714	736
ALMS1	0.0574552	5.76255	1.01344	0.325569	0.598984	-6.64728	1380	1489	1328	1464
ALMS1-IT1	0.219164	0.245542	0.629048	0.537981	0.766032	-5.27045	30	28	39	26
ALOX12	-0.119589	4.71214	-1.57995	0.133209	0.379919	-5.61172	731	739	629	638
ALOX12B	0.266437	2.11644	1.3099	0.208279	0.482653	-5.14136	94	119	130	110
ALOX5	-0.0974159	5.62969	-1.71038	0.106041	0.333292	-5.71161	1374	1386	1118	1298
ALPL	-0.371246	0.275149	-1.01486	0.324908	0.598719	-5.01289	30	45	19	36
ALS2	-0.0208936	7.14655	-0.571078	0.575689	0.788128	-7.38176	3855	3835	3341	3756
ALX1	-0.125807	1.47087	-0.520798	0.609467	0.811883	-5.61936	91	66	62	71
ALYREF	0.0116293	7.61186	0.339127	0.738817	0.881455	-7.58789	5398	5102	4731	5174
AMBRA1	-0.0923877	5.90319	-1.81126	0.0884533	0.301606	-5.63801	1640	1689	1396	1526
AMD1	0.0911138	8.54032	2.98602	0.00854885	0.0715366	-4.04685	9756	9673	9545	9822
AMDHD2	0.12664	4.24706	1.36242	0.191482	0.462236	-5.75269	512	466	506	494
AMER1	0.0048942	5.45596	0.0839363	0.934123	0.976086	-7.07166	1164	1196	1068	1148
AMFR	0.0195924	6.25917	0.436461	0.668193	0.845383	-7.22235	2073	2025	1864	2024
AMH	0.387915	4.22568	3.98331	0.00102318	0.0161614	-0.906568	409	473	538	540
AMHR2	-1.55895	0.854549	-5.15067	8.94764e-05	0.0026386	0.94427	78	88	31	22
AMIGO1	-0.291809	0.699417	-1.0073	0.32842	0.601252	-5.10085	45	51	35	38
AMIGO2	0.353573	2.65921	2.12512	0.0490989	0.214159	-4.11982	155	146	151	212
AMMECR1	0.14318	9.02788	5.2888	6.76686e-05	0.00214313	0.743237	13571	13188	13497	14154
AMMECR1L	0.0526599	5.1663	0.803255	0.433314	0.691109	-6.64933	971	927	912	931
AMN	-0.302775	2.16647	-1.52081	0.14735	0.403651	-4.89123	157	114	96	107
AMN1	0.185242	1.04888	0.697521	0.495246	0.736963	-5.41073	56	48	48	63
AMPD2	-0.178484	6.63749	-4.11114	0.000779634	0.0133322	-1.29487	2796	2909	2304	2413
AMPD3	-0.482768	3.90944	-4.90461	0.000147976	0.00390851	1.05681	483	473	308	332
AMT	-0.416423	-0.0990807	-1.1439	0.269083	0.547561	-4.84352	28	29	22	18
AMZ2	-0.0640252	4.83141	-0.899459	0.381423	0.648809	-6.45604	794	774	661	743
AMZ2P1	0.00240938	1.78329	0.0115166	0.99095	0.996824	-5.84109	92	92	90	83
ANAPC1	-0.0378156	7.62232	-1.12417	0.277125	0.555458	-7.00611	5314	5441	4735	5069
ANAPC10	-0.0356463	3.79149	-0.324218	0.749871	0.887394	-6.45863	374	379	360	330
ANAPC11	-0.0800413	5.97747	-1.54774	0.14076	0.394034	-6.05851	1754	1733	1535	1554
ANAPC13	-0.0267485	5.78768	-0.516602	0.612329	0.813751	-7.04043	1519	1484	1326	1433
ANAPC15	-0.230273	2.91263	-1.44236	0.168025	0.432478	-5.21251	252	190	179	171
ANAPC16	-0.0917652	5.62499	-1.68471	0.110975	0.342724	-5.74925	1376	1368	1151	1259
ANAPC2	-0.10587	6.29941	-2.31908	0.0335928	0.170223	-4.87751	2170	2231	1851	1976
ANAPC4	0.0182231	5.78049	0.315069	0.756682	0.890869	-7.12585	1477	1462	1409	1380
ANAPC5	0.00807044	8.041	0.238472	0.814469	0.922983	-7.69898	6924	7232	6281	7045
ANAPC7	0.070982	6.60763	1.585	0.132055	0.37813	-6.18516	2673	2456	2435	2604
ANGEL1	0.097857	5.50108	1.68907	0.110123	0.340942	-5.70502	1208	1151	1113	1250
ANGEL2	0.00366863	5.16355	0.0576021	0.954761	0.9817	-6.97931	955	973	861	948
ANGPTL6	0.068877	1.62244	0.317772	0.754668	0.889847	-5.74426	79	82	76	82
ANK1	-0.0136737	10.2387	-0.629896	0.537439	0.765612	-7.8648	32609	32793	29218	31413
ANK3	-0.0387028	1.8584	-0.187052	0.853914	0.940586	-5.84708	108	90	81	99
ANKAR	0.221728	1.51869	0.987573	0.337707	0.609696	-5.30951	69	73	75	80
ANKDD1A	0.0807355	3.15462	0.535492	0.599496	0.804968	-6.14718	267	202	242	220
ANKEF1	0.100203	2.29359	0.532803	0.601315	0.806452	-5.86504	110	147	120	135
ANKFY1	-0.0571173	7.04766	-1.44191	0.168149	0.432568	-6.49482	3574	3699	3068	3477
ANKH	0.150911	3.08371	0.985094	0.338887	0.610636	-5.78657	198	235	246	206
ANKHD1	0.027009	2.39029	0.161774	0.87346	0.950728	-6.02418	137	142	125	141
ANKHD1-EIF4EBP3	0.0975265	-0.146863	0.207153	0.83844	0.933146	-5.33847	20	27	12	43
ANKIB1	0.0795523	5.8949	1.41931	0.174533	0.440053	-6.21158	1491	1630	1483	1600
ANKLE1	-0.164526	7.43741	-4.5609	0.000301976	0.00662374	-0.513237	4858	5028	4010	4243
ANKLE2	0.0580603	6.34995	1.2817	0.217768	0.493447	-6.52179	2120	2186	2036	2159
ANKMY1	-0.0415516	4.45077	-0.503114	0.621573	0.820416	-6.60835	580	615	519	567
ANKMY2	0.114545	5.5875	2.06646	0.0549498	0.228927	-5.11881	1235	1254	1209	1313
ANKRA2	-0.0675941	2.94771	-0.484621	0.634354	0.826802	-6.10287	203	222	182	197
ANKRD10	0.0195632	5.47589	0.301282	0.766985	0.896791	-7.03409	1128	1257	1070	1189
ANKRD10-IT1	-0.033117	2.50509	-0.198559	0.845048	0.936318	-6.05478	143	166	142	140
ANKRD11	-0.0985504	7.56419	-2.92074	0.009805	0.0780815	-4.00533	5235	5314	4470	4750
ANKRD12	-0.0917142	4.88742	-1.25256	0.227932	0.504735	-6.1027	805	842	666	781
ANKRD13A	0.0712049	5.97307	1.33935	0.198723	0.470548	-6.33946	1614	1686	1607	1638
ANKRD13B	0.0330715	4.69191	0.404052	0.691394	0.857251	-6.7384	648	731	619	699
ANKRD13C	-0.0264021	4.98208	-0.391769	0.700272	0.861242	-6.84112	862	855	767	811
ANKRD13D	-0.146534	4.3673	-1.7125	0.105642	0.332627	-5.30104	593	577	454	536
ANKRD16	0.318205	3.64411	2.67297	0.0164118	0.10954	-3.40498	276	328	355	348
ANKRD17	0.0452353	8.20503	1.45848	0.16359	0.42688	-6.69962	7852	7795	7410	7699
ANKRD18B	0.231893	4.66816	2.87012	0.0109007	0.0833839	-3.3254	597	668	672	716
ANKRD18EP	-0.0511289	3.24408	-0.410655	0.68664	0.854686	-6.23677	263	256	217	252
ANKRD20A7P	0.268852	0.19708	0.681659	0.504966	0.742791	-5.2317	42	18	35	28
ANKRD24	0.465443	0.238061	1.3768	0.187077	0.45621	-4.66958	32	22	32	37
ANKRD26	-0.173022	4.33118	-2.02175	0.0598286	0.240103	-4.79318	562	589	456	499
ANKRD27	-0.1428	7.88843	-4.18668	0.000664193	0.0119507	-1.39424	6640	6770	5594	5772
ANKRD28	0.0223526	5.89373	0.435374	0.668966	0.845988	-7.11388	1591	1588	1414	1609
ANKRD32	0.0140838	4.97737	0.174187	0.86385	0.945262	-6.9042	801	892	714	887
ANKRD33B	-0.471	0.623124	-1.57279	0.134856	0.383249	-4.50294	53	44	33	32
ANKRD34A	0.378128	0.213342	1.13642	0.272113	0.550567	-4.89961	29	25	29	37
ANKRD36	0.00890267	4.55491	0.112492	0.911798	0.967448	-6.76951	653	609	573	615
ANKRD36B	0.127953	3.24869	0.913738	0.374091	0.642282	-5.90704	273	218	260	241
ANKRD36BP2	0.0860722	5.5684	1.54076	0.142444	0.395978	-5.94357	1256	1224	1197	1267
ANKRD36C	-0.0672273	3.52655	-0.490508	0.630271	0.82462	-6.29744	281	357	299	269
ANKRD37	-0.241294	1.20271	-0.830934	0.417943	0.679246	-5.35573	53	84	61	46
ANKRD39	-0.143003	2.87394	-0.875553	0.393914	0.659979	-5.8152	184	232	188	164
ANKRD40	0.219763	5.39916	3.53287	0.00267628	0.0325108	-2.18139	1033	1072	1139	1156
ANKRD42	0.200404	3.45316	1.72248	0.103783	0.329319	-4.99183	279	271	272	320
ANKRD46	0.116012	5.62523	2.07934	0.0536132	0.22563	-5.10818	1314	1240	1253	1337
ANKRD49	-0.171168	4.14447	-1.85508	0.0816492	0.287517	-5.00642	505	506	385	456
ANKRD50	-0.143171	4.74527	-1.93106	0.0709455	0.266952	-5.07983	743	775	616	670
ANKRD52	-0.0132176	7.01185	-0.337162	0.740271	0.881746	-7.4621	3446	3541	3043	3439
ANKRD54	-0.0208183	4.80725	-0.241371	0.812259	0.922433	-6.83219	838	688	658	744
ANKRD61	-0.117115	0.972247	-0.410193	0.686973	0.854874	-5.53514	45	66	48	46
ANKRD9	-0.209377	5.04332	-2.23093	0.0399698	0.190052	-4.65728	976	939	643	922
ANKS1A	0.137354	6.12878	2.87966	0.0106855	0.0822702	-3.74442	1824	1769	1807	1892
ANKS3	0.0336759	4.25685	0.368056	0.717538	0.869621	-6.6028	484	535	456	519
ANKS6	0.107271	1.75669	0.490302	0.630414	0.82472	-5.71728	85	89	97	80
ANKZF1	-0.049305	5.33868	-0.817639	0.425282	0.685164	-6.6924	1096	1121	963	1042
ANLN	-0.100317	6.49834	-2.29243	0.0354127	0.176088	-4.98158	2526	2514	2166	2235
ANO10	0.119471	4.15595	1.22621	0.237434	0.515327	-5.889	499	424	457	479
ANO5	-0.0332987	4.38473	-0.342728	0.736156	0.879889	-6.65577	523	620	477	565
ANO6	0.0316515	4.86848	0.428677	0.673735	0.848065	-6.78768	746	811	719	769
ANO7	0.243156	2.3287	1.37123	0.188773	0.458186	-5.12989	133	115	142	133
ANO8	-0.654752	3.22847	-4.72754	0.000213383	0.00519341	0.797063	301	331	201	176
ANP32A	0.0699507	8.24052	2.18456	0.0437581	0.200852	-5.54732	8034	7875	7282	8363
ANP32B	0.0494669	8.83574	1.55283	0.139544	0.391867	-6.67408	12608	11607	11322	12113
ANP32E	0.0464246	7.69762	1.41955	0.174466	0.440022	-6.65924	5593	5412	5157	5478
ANPEP	-0.244452	6.11875	-5.14545	9.04297e-05	0.00266039	1.01773	2058	2015	1568	1650
ANTXR2	-0.496083	1.1891	-1.98113	0.0645972	0.252817	-4.03971	73	72	44	52
ANXA1	0.052433	2.44108	0.316309	0.755758	0.890456	-6.00393	145	141	141	137
ANXA11	-0.13866	6.05071	-2.63742	0.0176566	0.115098	-4.20127	1822	1928	1485	1703
ANXA2	-0.160985	6.9783	-4.18854	0.000661583	0.0119323	-1.21119	3674	3511	2849	3166
ANXA2P2	-0.221707	2.70111	-1.32758	0.202497	0.474641	-5.29157	172	208	130	175
ANXA2R	0.171798	1.74872	0.805337	0.432145	0.690487	-5.52224	88	82	78	102
ANXA4	-0.0778002	4.45	-0.887543	0.387616	0.653484	-6.33682	605	602	552	521
ANXA5	-0.365862	4.4341	-4.07832	0.000835932	0.013924	-0.759199	694	627	489	471
ANXA6	-0.00971163	4.08012	-0.101848	0.920112	0.970369	-6.6071	444	469	424	425
ANXA7	-0.000859518	6.70876	-0.0188137	0.985217	0.994266	-7.44679	2767	2867	2630	2641
ANXA9	-0.0601026	2.31639	-0.345761	0.733917	0.878717	-5.95274	131	142	123	122
AOC2	0.0576837	1.44507	0.234138	0.817775	0.924119	-5.71508	60	85	67	72
AP000254.8	0.507186	0.590993	1.60214	0.128205	0.370586	-4.46431	28	40	49	41
AP000347.2	-0.571146	0.98401	-2.14066	0.0476482	0.210517	-3.77966	64	65	37	44
AP000350.5	-0.242797	0.797273	-0.860241	0.402055	0.667412	-5.23907	50	51	35	45
AP000487.5	0.297468	-0.0792585	0.799852	0.435228	0.692295	-5.10848	28	18	27	25
AP001053.11	-0.00933727	2.71255	-0.0597692	0.953062	0.981534	-6.14159	194	161	152	177
AP001062.7	0.0803172	0.885919	0.267792	0.792198	0.911384	-5.55811	62	37	44	51
AP001205.1	0.16778	1.96423	0.845735	0.409869	0.672786	-5.55434	98	99	109	99
AP001372.2	0.177585	-0.190848	0.421608	0.678785	0.850459	-5.2744	31	15	28	19
AP001469.9	0.219551	1.44946	0.870144	0.396778	0.663255	-5.3899	71	64	87	63
AP001628.6	0.780867	1.20386	3.07224	0.0071283	0.0635761	-2.27995	50	44	67	85
AP001816.1	-0.188888	0.359954	-0.590821	0.562694	0.779931	-5.3132	35	38	26	34
AP001877.1	0.114559	0.694482	0.395852	0.697316	0.859871	-5.47314	39	44	39	45
AP003068.23	-0.580035	0.779338	-1.84804	0.0827098	0.290116	-4.17239	71	44	37	33
AP006222.2	-0.316387	1.38981	-1.32754	0.202511	0.474641	-4.93211	83	74	52	66
AP006621.1	0.224204	1.46787	0.981405	0.340648	0.611735	-5.30179	68	69	69	81
AP006621.5	0.00383838	0.947576	0.0129683	0.98981	0.996824	-5.60641	64	41	53	44
AP1AR	0.0573784	4.48434	0.706568	0.489751	0.733623	-6.49459	579	603	541	610
AP1B1	-0.00699068	8.01994	-0.212598	0.83426	0.931685	-7.70129	6862	7159	6266	6790
AP1G1	-0.0222838	7.226	-0.627082	0.539237	0.766677	-7.36445	4099	4030	3544	3950
AP1G2	-0.0740869	4.15583	-0.816708	0.425799	0.685509	-6.29701	503	481	431	444
AP1M1	-0.0655421	6.75537	-1.6494	0.118083	0.353857	-6.12811	2952	3002	2547	2778
AP1S1	-0.0419815	5.51292	-0.719099	0.4822	0.728818	-6.82506	1284	1213	1066	1204
AP1S2	0.00798581	3.29519	0.0650185	0.948945	0.980292	-6.33885	272	255	230	266
AP1S3	0.0935223	2.84002	0.61164	0.549161	0.773318	-5.99821	175	199	163	211
AP2A1	-0.216054	8.10905	-7.06184	2.33744e-06	0.000159452	4.36058	8113	7922	6095	6831
AP2A2	-0.0669499	6.10693	-1.40272	0.179345	0.446098	-6.2963	1923	1878	1599	1798
AP2B1	-0.0764174	8.66034	-2.78068	0.0131338	0.094525	-4.48226	11263	11123	9402	10477
AP2M1	-0.0633947	8.51147	-2.30925	0.0342537	0.172449	-5.36671	10103	9994	8651	9350
AP2S1	-0.071618	6.94284	-1.76254	0.0965993	0.316099	-6.00101	3511	3288	2852	3203
AP3B1	0.0261789	6.45859	0.618531	0.54472	0.771198	-7.17963	2366	2329	2139	2336
AP3B2	-0.447858	0.0899976	-1.31395	0.206942	0.480739	-4.71185	33	33	21	24
AP3D1	0.0606464	8.48996	2.05375	0.0562985	0.231592	-5.82048	9357	9610	8959	9551
AP3M1	-0.106542	6.40214	-2.40755	0.0281584	0.154753	-4.74173	2418	2311	1947	2164
AP3M2	-0.0177201	5.77492	-0.339567	0.738492	0.881357	-7.11553	1478	1489	1323	1420
AP3S1	-0.0020744	5.91823	-0.0397816	0.968747	0.987403	-7.21981	1677	1585	1427	1622
AP3S2	-0.048544	3.16509	-0.377905	0.710347	0.866728	-6.22297	256	235	210	234
AP4B1	-0.0538246	5.11157	-0.811417	0.428744	0.687958	-6.62434	928	970	806	905
AP4E1	0.0809755	5.57446	1.40821	0.177742	0.444175	-6.12719	1263	1231	1222	1248
AP4M1	0.160785	3.72275	1.53641	0.143501	0.398116	-5.34793	330	342	335	368
AP4S1	0.0698569	2.10986	0.380515	0.708446	0.866196	-5.87357	115	111	107	115
AP5B1	0.0582227	3.90189	0.589879	0.563311	0.780176	-6.37261	389	399	377	391
AP5M1	0.00428108	5.71581	0.0686228	0.946119	0.979729	-7.15539	1451	1373	1356	1299
AP5S1	-0.14563	3.65699	-1.3638	0.191055	0.461739	-5.55387	357	357	286	318
AP5Z1	-0.0203225	5.57036	-0.360641	0.72297	0.872611	-7.04351	1273	1305	1128	1251
APAF1	0.270065	4.32981	3.03049	0.00778474	0.0673503	-2.90121	508	477	562	551
APBA3	0.183954	4.06983	1.92399	0.0718853	0.268812	-4.87323	413	436	415	488
APBB1IP	-0.0651278	5.70095	-1.18644	0.252351	0.531096	-6.44069	1480	1387	1227	1337
APBB3	0.0118632	3.77567	0.108758	0.914714	0.96837	-6.50171	344	392	323	370
APC	0.0542418	6.27893	1.20484	0.245361	0.522946	-6.59365	2090	2015	1920	2069
APC2	0.096537	6.54503	2.07267	0.054302	0.227595	-5.38759	2450	2418	2234	2644
APEH	-0.035916	8.46811	-1.16403	0.261064	0.53973	-7.11478	9598	9715	8668	8960
APEX1	0.033368	7.80279	1.01327	0.325648	0.599039	-7.15785	6012	5877	5575	5811
APEX2	-0.149313	5.78191	-2.80161	0.0125746	0.0916695	-3.79835	1544	1576	1287	1346
APH1A	0.051989	6.45931	1.14501	0.268637	0.547181	-6.71329	2358	2295	2237	2279
APH1B	-0.022334	1.70281	-0.100671	0.921032	0.970475	-5.81167	100	77	82	80
API5	0.0350779	7.93245	1.02862	0.318587	0.593065	-7.16632	6705	6300	6081	6384
APIP	0.130264	4.83944	1.8355	0.0846293	0.294213	-5.2672	752	722	715	795
APITD1	-0.163632	2.81778	-1.0646	0.302478	0.579964	-5.62095	223	180	165	170
APLF	0.344957	1.15826	1.34115	0.198148	0.470096	-4.86795	58	48	65	61
APLP2	0.00559242	8.86398	0.202129	0.842302	0.934594	-7.8486	12684	12367	11495	12037
APMAP	0.0915211	6.29558	2.0222	0.0597777	0.240097	-5.40542	2071	2027	1995	2092
APOA1BP	0.0956808	5.98265	1.93031	0.0710447	0.266955	-5.46938	1626	1669	1586	1709
APOBEC3B	-0.129255	6.03568	-2.69045	0.015831	0.107517	-4.09314	1861	1835	1505	1658
APOBEC3C	-0.0556068	7.80988	-1.7321	0.102015	0.3255	-6.22778	6263	6064	5256	5848
APOBEC3D	-0.421946	2.50918	-2.53681	0.0216876	0.132375	-3.36594	165	190	118	129
APOBEC3F	-1.23177	0.954247	-4.34044	0.000479847	0.00940854	-0.214051	72	88	28	35
APOBEC3G	-0.462688	2.69257	-2.66168	0.0167976	0.111045	-3.1778	239	174	130	147
APOBR	-0.877621	1.58849	-3.73957	0.00172092	0.0236079	-1.08658	111	107	63	49
APOC1	-0.536179	2.35301	-2.9043	0.0101485	0.0796419	-2.66141	147	186	100	113
APOL1	-0.199285	4.367	-2.39236	0.0290285	0.157512	-4.14861	598	592	470	500
APOL2	-0.0948338	4.63305	-1.08861	0.292063	0.570287	-6.20279	737	648	544	670
APOL4	-0.351559	6.75178	-8.14306	3.69422e-07	3.91998e-05	6.50984	3372	3185	2371	2438
APOLD1	-0.552334	1.40158	-2.28514	0.0359267	0.176899	-3.60312	78	94	55	54
APOM	0.0764198	1.58949	0.348468	0.731921	0.877523	-5.72486	78	79	72	83
APOO	0.10006	3.37338	0.829518	0.418721	0.679622	-6.02121	257	282	258	282
APOOL	0.111439	3.28578	0.890934	0.385847	0.65245	-5.93961	240	265	250	260
APOPT1	0.212459	3.04012	1.5912	0.130652	0.375125	-5.053	208	203	207	239
APP	0.0718857	8.65729	2.58567	0.0196313	0.123529	-4.86686	10699	10515	10155	10711
APPBP2	0.0503172	4.62313	0.637422	0.532647	0.76211	-6.58966	657	648	579	687
APPL1	-0.0581845	6.16443	-1.24259	0.23149	0.508933	-6.51518	1977	1964	1728	1815
APPL2	0.111931	3.90303	1.10717	0.284192	0.563232	-5.93776	370	405	381	402
APRT	-0.0544216	6.7975	-1.28565	0.216419	0.491196	-6.63695	2992	3118	2580	2928
APTX	0.0520882	5.57715	0.933036	0.364334	0.633427	-6.66732	1251	1274	1183	1267
AQP1	-1.22394	0.303139	-3.56184	0.0025157	0.0310446	-1.62604	0	0	0	0
AQP1	-1.22394	0.303139	-3.56184	0.0025157	0.0310446	-1.62604	49	52	15	26
AQP11	0.341985	1.28187	1.38396	0.184914	0.452803	-4.84549	52	64	66	71
AQP3	-0.88113	5.75606	-14.1677	1.26724e-10	9.25459e-08	14.7042	2012	1934	1032	977
AQR	-0.0230335	6.91308	-0.568687	0.577273	0.788692	-7.32925	3242	3300	2969	3057
ARAF	-0.0338226	6.10036	-0.693994	0.497398	0.73866	-7.02485	1879	1862	1595	1827
ARAP1	-0.0749163	6.53506	-1.75165	0.0985067	0.319144	-5.91381	2623	2504	2209	2346
ARCN1	0.0394759	7.13559	1.07254	0.299004	0.576892	-6.96228	3690	3783	3438	3750
AREG	0.699768	0.961857	2.41163	0.0279287	0.153899	-3.36431	45	37	49	78
AREL1	-0.161007	6.939	-4.09053	0.000814516	0.0137	-1.41141	3536	3451	2875	2974
ARF1	-0.0138021	8.37895	-0.462678	0.649674	0.835484	-7.67635	8889	9133	8052	8652
ARF3	-0.172429	6.06118	-3.01352	0.0080681	0.0687006	-3.45162	1868	1947	1614	1558
ARF4	-0.0342039	6.62629	-0.829881	0.418521	0.679585	-7.06843	2724	2660	2396	2525
ARF5	-0.0670148	5.70341	-1.15199	0.26584	0.544621	-6.48064	1406	1465	1281	1285
ARF6	-0.0401791	7.18777	-0.813738	0.427451	0.686964	-7.21819	4231	3743	3618	3630
ARFGAP1	0.0565234	6.92111	1.36098	0.191929	0.4625	-6.57288	3107	3298	2986	3245
ARFGAP2	0.0577246	7.54517	1.58009	0.133176	0.379919	-6.40592	4869	4998	4484	5135
ARFGAP3	-0.0294632	5.89872	-0.543206	0.594294	0.801886	-7.06023	1642	1602	1490	1487
ARFGEF1	0.0566762	6.76873	1.2299	0.236086	0.513521	-6.69793	2785	2981	2610	3003
ARFGEF2	0.0243899	6.90197	0.584638	0.566747	0.781969	-7.31721	3134	3258	2840	3247
ARFIP1	0.0250364	5.34437	0.393556	0.698978	0.860298	-6.95839	1046	1124	1005	1060
ARFIP2	0.0661687	5.76495	1.14847	0.267248	0.545567	-6.5044	1511	1355	1350	1455
ARFRP1	0.021918	4.7443	0.28581	0.778602	0.903481	-6.79868	706	725	683	678
ARG2	-0.243914	1.10826	-0.875181	0.394111	0.660053	-5.29918	60	65	60	41
ARGLU1	0.0726102	6.71728	1.8041	0.0896103	0.303784	-5.88015	2737	2791	2596	2845
ARHGAP1	-0.0854754	5.81892	-1.27922	0.21862	0.494295	-6.36673	1479	1662	1251	1519
ARHGAP11A	0.0655944	8.28461	2.29096	0.0355163	0.176092	-5.36197	8299	8124	7697	8390
ARHGAP11B	-0.065851	5.74726	-1.23194	0.23534	0.512981	-6.40186	1470	1489	1292	1354
ARHGAP12	0.0660121	3.49958	0.535738	0.59933	0.804833	-6.26526	324	272	296	287
ARHGAP15	-0.123605	5.15334	-1.93366	0.0706022	0.266398	-5.20667	1018	983	815	904
ARHGAP17	0.0725137	5.0881	1.01584	0.324458	0.59818	-6.43076	952	838	831	928
ARHGAP18	-0.203932	4.58937	-2.62881	0.0179712	0.116306	-3.772	687	704	545	585
ARHGAP19	0.0396093	5.82952	0.767702	0.453575	0.70643	-6.88803	1497	1524	1401	1505
ARHGAP21	-0.00756971	5.72427	-0.123858	0.902933	0.963882	-7.15234	1355	1503	1299	1358
ARHGAP22	-1.48849	0.700847	-4.57983	0.000290263	0.00647709	0.0365509	86	62	19	30
ARHGAP23	-0.817733	5.26148	-12.5009	8.372e-10	2.96967e-07	12.8288	1396	1345	726	730
ARHGAP26	0.692656	0.0838792	1.78972	0.0919772	0.307458	-4.18121	15	32	35	32
ARHGAP33	-0.181849	4.78693	-2.44771	0.0259746	0.148128	-4.17911	785	797	650	656
ARHGAP35	-0.0413278	6.99208	-1.11545	0.280736	0.559833	-6.88298	3474	3483	3021	3307
ARHGAP39	-0.341662	2.6902	-2.22641	0.0403254	0.19123	-3.95426	200	191	130	159
ARHGAP4	0.0521321	6.22231	1.13963	0.27081	0.549259	-6.65175	1961	1989	1832	2001
ARHGAP42	0.228337	2.33409	1.27066	0.221577	0.49777	-5.25094	118	133	119	157
ARHGAP44	0.157059	0.58438	0.519624	0.610267	0.812402	-5.39748	34	42	36	43
ARHGAP5	0.361001	0.385274	1.04586	0.310795	0.586819	-5.00834	37	25	44	31
ARHGAP6	-0.236961	1.63139	-1.08551	0.293395	0.571372	-5.24652	91	89	73	70
ARHGAP9	-0.126209	4.31683	-1.47886	0.158125	0.418398	-5.621	576	545	463	498
ARHGDIA	-0.0151642	7.16999	-0.418991	0.680658	0.850795	-7.46542	3973	3826	3489	3733
ARHGDIB	0.0658005	5.25377	0.973986	0.34421	0.614834	-6.52532	1068	944	939	1029
ARHGDIG	-0.0922033	3.71475	-0.79728	0.436678	0.693446	-6.16268	334	398	314	326
ARHGEF1	0.0864315	7.04696	2.32422	0.0332521	0.169677	-5.06153	3495	3420	3244	3630
ARHGEF10	0.0191862	6.15694	0.398651	0.695292	0.85893	-7.20914	1936	1884	1690	1935
ARHGEF11	-0.043155	3.56451	-0.374769	0.712633	0.867654	-6.36191	325	322	262	327
ARHGEF12	-0.033519	7.29294	-0.957347	0.352291	0.622755	-7.11229	4278	4270	3702	4117
ARHGEF18	-0.0558129	4.68402	-0.6874	0.501436	0.740847	-6.57599	705	708	569	706
ARHGEF19	-0.187978	1.91257	-0.927696	0.367016	0.635219	-5.46969	105	111	77	101
ARHGEF2	-0.63395	6.92831	-16.4151	1.31699e-11	1.4864e-08	16.9523	4165	4010	2357	2573
ARHGEF33	0.464114	0.899678	1.50035	0.152527	0.4113	-4.63449	34	53	43	69
ARHGEF37	-0.899517	1.21054	-3.41195	0.00346432	0.038931	-1.69787	81	89	34	52
ARHGEF39	-0.00610202	4.25834	-0.0685002	0.946216	0.979729	-6.67114	541	492	468	494
ARHGEF6	0.0112548	6.80258	0.254623	0.802179	0.916808	-7.43713	3003	2991	2592	3070
ARHGEF7	0.0972867	6.03151	1.85896	0.0810692	0.28658	-5.60082	1673	1732	1694	1716
ARHGEF9	-0.0728747	3.56463	-0.660796	0.517918	0.752745	-6.21122	331	322	275	306
ARID1A	0.102156	7.79932	3.25961	0.00479197	0.048486	-3.35048	5864	5720	5570	6068
ARID1B	0.0387791	7.22741	0.970672	0.345809	0.616228	-7.08592	3976	3993	3532	4140
ARID2	0.144213	6.11945	2.8826	0.01062	0.0819436	-3.73586	1784	1776	1831	1853
ARID3A	-0.748967	3.23267	-5.72065	2.86851e-05	0.00116002	2.68961	339	316	187	178
ARID3B	-0.823238	3.26576	-6.45674	7.02848e-06	0.000380684	4.00397	336	353	169	195
ARID4A	0.0914214	4.91602	1.27478	0.220149	0.495765	-6.0864	764	811	770	800
ARID4B	0.0656229	4.87135	0.883394	0.389788	0.655365	-6.48452	807	736	700	811
ARID5A	-0.0291093	2.97041	-0.179998	0.859359	0.943153	-6.21317	229	199	158	239
ARID5B	0.854504	1.19014	3.12345	0.00639681	0.0592109	-2.19296	49	42	61	96
ARIH1	0.0655115	6.23596	1.24225	0.231612	0.508947	-6.53695	1891	2083	1859	2028
ARIH2	-0.0624563	6.9761	-1.67699	0.112496	0.345093	-6.14079	3502	3428	3000	3211
ARL1	0.142834	5.81682	2.66276	0.0167602	0.110916	-4.08449	1500	1391	1435	1551
ARL10	0.185899	1.97549	0.955219	0.353334	0.623149	-5.46569	103	95	96	115
ARL13B	0.065961	4.30604	0.622472	0.542189	0.769147	-6.49025	552	488	549	475
ARL14EP	-0.0230943	5.01624	-0.315161	0.756613	0.890869	-6.88063	929	829	803	815
ARL15	0.127302	4.64552	1.63942	0.120161	0.356889	-5.50436	664	625	651	667
ARL16	-0.0949761	4.63417	-1.25313	0.227728	0.50465	-6.01712	700	682	576	635
ARL17A	0.363993	1.21699	1.44802	0.166458	0.431022	-4.7568	61	49	64	68
ARL2	-0.131752	4.70522	-1.75554	0.0978224	0.317923	-5.34718	737	734	585	672
ARL2BP	-0.0353019	5.3214	-0.551849	0.588492	0.797457	-6.87304	1099	1079	999	992
ARL3	0.125855	2.83699	0.872295	0.395637	0.662062	-5.80736	190	178	173	203
ARL4A	-0.22984	6.0122	-4.20217	0.00064274	0.0117175	-0.934919	1828	1936	1496	1508
ARL4D	-0.510112	0.889368	-1.79754	0.0906828	0.305516	-4.25474	66	53	33	45
ARL5A	0.00356912	6.76698	0.0825112	0.935239	0.976323	-7.4587	2924	2939	2538	2969
ARL5B	-0.000800467	5.45745	-0.0127981	0.989943	0.996824	-7.07573	1245	1124	1081	1133
ARL6	0.0242954	1.93793	0.116553	0.908629	0.965973	-5.88278	90	115	100	94
ARL6IP1	-0.0580771	7.64918	-1.75424	0.0980511	0.318333	-6.16301	5460	5575	4760	5160
ARL6IP4	-0.441119	-0.114528	-1.21988	0.239759	0.518163	-4.77357	30	27	20	19
ARL6IP5	-0.0994264	5.69946	-1.65606	0.116713	0.351528	-5.81521	1525	1377	1176	1358
ARL6IP6	-0.000274401	4.65323	-0.00329943	0.997407	0.999258	-6.81017	645	713	581	689
ARL8A	0.00809278	2.96511	0.0563922	0.955711	0.9817	-6.22656	196	223	200	194
ARL8B	-0.0310587	6.78549	-0.735822	0.472231	0.72148	-7.1851	3079	2927	2711	2790
ARMC1	0.0150119	6.83392	0.336552	0.740722	0.881947	-7.41943	2982	3137	2679	3111
ARMC10	0.0693006	5.68165	1.2565	0.226534	0.503296	-6.35272	1324	1376	1256	1395
ARMC2	-0.240183	0.918561	-0.751539	0.462977	0.71393	-5.34309	44	69	32	58
ARMC5	-0.0823883	4.64036	-1.07044	0.299921	0.577486	-6.22466	683	698	601	620
ARMC6	-0.0456396	7.39743	-1.22692	0.237173	0.515044	-6.84374	4740	4493	3918	4458
ARMC7	0.112	3.88238	1.11637	0.280353	0.55949	-5.92099	375	389	358	415
ARMC8	0.0658783	6.82221	1.70362	0.107322	0.335195	-6.06364	2988	2971	2772	3067
ARMC9	-0.246084	0.153452	-0.652301	0.523244	0.755797	-5.23839	40	26	18	35
ARMCX1	0.433172	2.2466	2.3879	0.0292891	0.158398	-3.57563	100	120	133	144
ARMCX3	0.0558292	5.0607	0.820615	0.423632	0.683853	-6.60086	920	844	826	889
ARMCX4	-0.0982234	1.38003	-0.413675	0.684471	0.853309	-5.64139	75	69	65	61
ARMCX5	0.290578	4.14249	3.05448	0.00740064	0.0651162	-2.79832	460	401	478	506
ARMCX6	0.241869	3.91381	2.36758	0.0305026	0.162388	-4.05586	381	364	420	406
ARNT	0.00368583	5.74135	0.0568824	0.955326	0.9817	-7.16409	1421	1461	1200	1512
ARNTL2	0.339494	4.3644	3.67125	0.00199135	0.0264413	-1.59365	491	493	605	564
ARPC1A	0.0157099	5.91697	0.314046	0.757445	0.89126	-7.16847	1618	1618	1485	1577
ARPC1B	-0.377844	6.09534	-7.61687	8.89422e-07	7.51176e-05	5.74505	2087	2109	1493	1530
ARPC2	0.0392293	6.97145	1.02502	0.320234	0.594445	-6.9742	3418	3253	3064	3351
ARPC3	-0.0463347	6.89041	-1.17729	0.255882	0.534361	-6.78928	3315	3179	2868	3017
ARPC4	0.0200321	5.80265	0.368575	0.717158	0.869499	-7.11361	1518	1466	1405	1428
ARPC5	-0.0593269	6.289	-1.25386	0.227471	0.504405	-6.53772	2105	2197	1819	2045
ARPC5L	0.14011	6.01677	2.85173	0.0113274	0.0857499	-3.76845	1641	1681	1657	1769
ARPP19	0.0037319	7.41641	0.0893679	0.929872	0.974372	-7.60564	4416	4785	4062	4568
ARPP21	0.0244944	1.20987	0.0954311	0.925129	0.972027	-5.67143	68	55	62	55
ARRB1	-0.0990615	5.15823	-1.3032	0.210505	0.484717	-6.1289	1082	914	851	888
ARRB2	-0.0606519	4.45246	-0.739049	0.470322	0.720336	-6.45917	611	592	534	546
ARRDC1	-0.0307394	4.17886	-0.29259	0.773504	0.900508	-6.60157	480	508	387	523
ARRDC2	-0.361564	6.10494	-6.97529	2.72769e-06	0.00018305	4.5961	2088	2118	1404	1663
ARRDC3	0.0216033	4.23409	0.245381	0.809205	0.921001	-6.63404	512	494	446	510
ARRDC4	0.0182675	4.19153	0.203767	0.841042	0.934064	-6.62922	503	475	434	493
ARSA	0.146348	3.22951	1.10725	0.28416	0.563232	-5.71199	258	222	253	244
ARSB	-0.190834	4.63831	-2.09362	0.052166	0.222155	-4.76996	698	732	624	554
ARSG	-0.055296	3.43204	-0.411072	0.68634	0.854398	-6.30121	285	309	223	316
ARSK	0.158693	2.74372	1.06686	0.301487	0.57869	-5.59691	179	162	169	187
ART4	-0.354611	0.428347	-1.13995	0.270679	0.549179	-4.93173	42	39	29	30
ARV1	-0.00665311	5.92024	-0.120594	0.905477	0.964853	-7.21356	1718	1556	1433	1615
ARVCF	-0.17833	5.57699	-3.21002	0.00532433	0.0521197	-2.90586	1388	1347	1086	1176
ASAH1	-0.0813809	7.02687	-2.1693	0.0450761	0.203721	-5.33751	3692	3535	3077	3315
ASAH2	-0.0619065	0.127807	-0.174576	0.86355	0.945262	-5.40043	31	28	32	22
ASAH2B	-0.255993	2.58961	-1.60526	0.127514	0.369443	-4.89704	173	180	142	135
ASAP1	0.0635663	7.96126	2.05813	0.0558303	0.230711	-5.72006	6607	6525	6237	6606
ASB1	-0.0238762	5.2596	-0.342563	0.736278	0.879889	-6.95054	1078	1001	975	941
ASB13	0.156705	5.27017	2.40392	0.0283641	0.155303	-4.41365	949	1020	1004	1049
ASB16	0.251452	0.846284	0.908402	0.37682	0.644401	-5.21424	47	41	46	52
ASB16-AS1	0.0633576	2.29553	0.361348	0.722451	0.872154	-5.94109	122	136	125	127
ASB6	0.025989	5.41521	0.429827	0.672915	0.847974	-6.96574	1142	1134	1076	1094
ASB7	-0.0715255	3.84638	-0.710106	0.487612	0.732362	-6.27366	409	385	333	374
ASB8	-0.1259	5.37497	-2.11971	0.0496143	0.215522	-4.95923	1178	1156	973	1029
ASCC1	0.0288195	4.79526	0.39705	0.696449	0.85957	-6.77664	760	721	667	747
ASCC2	-0.0418741	6.85478	-1.02977	0.318065	0.593065	-6.94067	3258	3072	2715	3040
ASCC3	0.0773201	7.33721	2.21815	0.0409825	0.192872	-5.31758	4222	4258	4056	4317
ASF1A	-0.0469688	6.44576	-1.07674	0.29718	0.574923	-6.78352	2430	2342	2105	2218
ASF1B	-0.0426532	6.17345	-0.905338	0.378393	0.645739	-6.87474	2024	1923	1711	1875
ASH1L	0.104972	6.11293	1.91258	0.0734273	0.271714	-5.53709	1741	1853	1813	1805
ASH1L-AS1	0.403557	1.03539	1.46775	0.161085	0.423484	-4.69785	42	54	50	69
ASH2L	-0.00493668	7.72021	-0.14508	0.886415	0.956112	-7.65821	5611	5768	5168	5443
ASIC3	-0.206693	0.829397	-0.695395	0.496543	0.738153	-5.35852	45	58	33	51
ASIC4	-1.83738	1.0992	-6.33822	8.77104e-06	0.00045013	2.67575	98	121	23	34
ASL	0.0365439	4.66635	0.43847	0.666766	0.844597	-6.71471	709	644	584	716
ASMTL	-0.037123	4.99395	-0.481239	0.636704	0.828552	-6.80436	813	930	746	840
ASMTL-AS1	0.303934	1.78901	1.45821	0.163664	0.426956	-4.87421	79	88	88	105
ASNA1	0.0684486	7.22188	1.75377	0.0981335	0.318434	-6.07827	3955	3895	3826	3879
ASNS	-0.0523597	7.39609	-1.54443	0.141559	0.394844	-6.42718	4625	4616	3976	4366
ASNSD1	0.0787032	6.43194	1.75507	0.0979052	0.318025	-5.88091	2227	2298	2183	2289
ASPH	0.257671	2.83729	1.78891	0.0921119	0.307825	-4.70413	172	179	195	198
ASPHD2	-0.25034	0.489798	-0.80039	0.434925	0.692084	-5.21608	46	36	33	31
ASPM	-0.035364	7.66476	-1.10052	0.286996	0.564937	-7.0402	5543	5523	4871	5235
ASPSCR1	-0.0293916	5.05294	-0.435767	0.668686	0.845736	-6.84545	886	921	778	879
ASRGL1	0.288216	2.98487	1.90113	0.075003	0.274342	-4.57334	173	215	195	247
ASS1	-0.133458	3.47315	-1.01099	0.326703	0.600115	-5.89008	338	288	287	249
ASS1P12	0.349806	1.21758	1.29935	0.211791	0.485844	-4.92674	66	46	55	78
ASTE1	-0.171608	3.39194	-1.27263	0.220893	0.496809	-5.57766	302	299	207	297
ASTN2	0.222772	1.89041	1.12266	0.277746	0.556176	-5.28168	95	89	96	105
ASUN	0.0770483	6.74185	1.94987	0.0684978	0.262065	-5.64856	2796	2818	2646	2897
ASXL1	0.0458131	6.78925	1.02309	0.321121	0.595387	-6.93167	3052	2819	2637	3036
ASXL2	0.0383886	6.96012	1.02833	0.318722	0.593065	-6.96819	3314	3304	3072	3289
ATAD1	0.0630824	6.14156	1.23545	0.234065	0.5116	-6.51768	1951	1773	1751	1887
ATAD2	-0.0158065	8.13441	-0.531551	0.602162	0.807079	-7.59763	7587	7634	6790	7300
ATAD2B	0.0106985	5.47062	0.184326	0.856017	0.941794	-7.06219	1176	1203	1087	1156
ATAD3A	0.0547587	7.25968	1.50783	0.150616	0.408941	-6.45108	4114	3989	3702	4179
ATAD3B	0.0902461	6.96078	2.29436	0.0352784	0.176088	-5.09674	3192	3314	3078	3404
ATAD5	0.0318071	5.94492	0.625149	0.540474	0.767821	-7.02513	1614	1669	1486	1655
ATAT1	0.184918	4.15359	2.03549	0.058289	0.236654	-4.71498	456	443	444	513
ATE1	0.11005	5.65072	1.95717	0.067569	0.259631	-5.3239	1274	1332	1242	1390
ATF1	-0.0227789	5.83019	-0.445123	0.662049	0.842186	-7.08949	1544	1545	1355	1491
ATF2	0.0178458	5.1414	0.270459	0.790181	0.910112	-6.93561	918	972	854	936
ATF3	-0.0874919	1.34532	-0.332895	0.74343	0.88369	-5.66011	66	75	47	80
ATF4	-0.00514012	8.41762	-0.155918	0.878001	0.952914	-7.78284	9607	8862	8257	8956
ATF5	0.138955	6.69123	2.94165	0.00938428	0.0759986	-3.7717	2635	2666	2755	2712
ATF6	0.0271782	6.32499	0.598407	0.557742	0.777666	-7.15447	2117	2160	1989	2090
ATF6B	0.0375016	6.62568	0.917559	0.372145	0.640092	-6.99135	2657	2593	2444	2599
ATF7	0.0467625	4.37745	0.553527	0.58737	0.796787	-6.55621	536	565	517	547
ATF7IP	-0.0364682	5.33222	-0.553225	0.587572	0.79681	-6.87571	1164	1036	974	1031
ATF7IP2	0.0695046	5.72756	1.29714	0.212534	0.486515	-6.31728	1409	1378	1286	1452
ATG10	-0.0750183	2.79079	-0.488461	0.63169	0.825692	-6.04877	186	195	180	160
ATG12	0.0238734	5.58104	0.429728	0.672986	0.847977	-7.01867	1302	1255	1171	1262
ATG13	-0.051271	6.11179	-1.02612	0.319729	0.593998	-6.74	1850	1942	1670	1754
ATG14	-0.134724	5.22455	-2.00374	0.0619018	0.245922	-5.11167	1051	1061	817	986
ATG16L1	0.0472476	5.42445	0.801072	0.434541	0.692	-6.73402	1123	1153	1044	1157
ATG16L2	-0.521627	2.95355	-3.77305	0.00160215	0.0225519	-1.06871	249	250	157	168
ATG2A	-0.29249	5.97872	-5.5011	4.42452e-05	0.00162037	1.78125	1819	1942	1387	1485
ATG2B	-0.0564175	6.37493	-1.21718	0.240758	0.519356	-6.60601	2228	2331	1998	2104
ATG3	0.0606338	6.47047	1.27811	0.219003	0.4948	-6.56009	2444	2236	2231	2334
ATG4A	-0.0804841	4.38332	-0.836014	0.41516	0.677375	-6.35831	636	525	474	550
ATG4B	0.0434091	6.31769	0.983689	0.339557	0.611008	-6.84291	2126	2106	1969	2113
ATG4C	0.00124488	4.86292	0.0167264	0.986857	0.995274	-6.88145	749	819	701	766
ATG4D	-0.261397	4.83348	-3.61714	0.00223538	0.0284346	-1.83796	833	847	646	666
ATG5	-0.0282151	5.88447	-0.562503	0.58138	0.791863	-7.0448	1611	1602	1416	1533
ATG7	-0.0746864	4.66916	-0.976035	0.343223	0.613817	-6.32964	695	710	617	632
ATG9A	-0.0763272	6.47414	-1.72356	0.103582	0.328893	-5.94062	2474	2441	2152	2212
ATG9B	0.150294	4.18748	1.63437	0.121227	0.359195	-5.35993	478	454	442	527
ATHL1	0.339925	3.23854	2.53454	0.0217878	0.132596	-3.55193	223	229	232	306
ATIC	0.0370848	7.73439	1.14027	0.270551	0.549108	-7.00979	5785	5543	5219	5658
ATL1	0.416225	0.43105	1.32875	0.202121	0.474085	-4.74851	32	30	34	44
ATL2	-0.059553	6.16364	-1.25868	0.225766	0.50231	-6.49553	1945	1998	1682	1859
ATL3	0.0328541	6.98686	0.874086	0.394689	0.660856	-7.1214	3404	3353	3055	3417
ATM	-0.0268207	7.57594	-0.644622	0.528085	0.75952	-7.42431	5032	5353	4404	5144
ATMIN	0.0245271	5.83801	0.472867	0.642539	0.832151	-7.0789	1523	1533	1368	1542
ATN1	-0.234117	6.13102	-4.14619	0.000723735	0.012673	-1.08629	2105	1995	1466	1803
ATOX1	0.204994	3.9741	2.13617	0.0480628	0.211595	-4.48625	406	382	406	444
ATP11A	-0.102208	6.72692	-2.03898	0.0579034	0.235541	-5.49263	2800	3121	2477	2677
ATP11B	0.0251793	7.45894	0.699849	0.493829	0.736265	-7.36304	4849	4552	4257	4695
ATP11C	-0.0320752	5.94685	-0.633961	0.534848	0.76341	-7.01968	1725	1635	1489	1586
ATP13A1	0.0309205	7.66075	0.952737	0.354553	0.623761	-7.19047	5401	5383	4995	5316
ATP13A2	0.0676367	4.48408	0.729344	0.476078	0.724126	-6.47792	553	628	518	640
ATP13A3	-0.0353559	8.37541	-1.21045	0.243262	0.521622	-7.04515	9130	8979	8058	8478
ATP1A1	-0.0279713	8.63996	-0.933226	0.364239	0.633427	-7.38381	10656	11047	9660	10256
ATP1B2	-1.01952	4.63949	-12.5339	8.04891e-10	2.93904e-07	12.7369	959	950	445	437
ATP1B3	0.0507871	6.63042	1.1401	0.270621	0.549159	-6.76544	2541	2706	2428	2656
ATP2A1	0.151428	1.19575	0.560097	0.582982	0.793262	-5.52634	48	70	64	57
ATP2A2	0.106016	8.28169	3.46405	0.00309984	0.0360679	-3.00602	7954	8210	7766	8516
ATP2B1	0.0940462	5.24685	1.47824	0.158289	0.418654	-5.92934	997	981	980	997
ATP2B4	-0.259927	7.61046	-7.48259	1.11942e-06	8.90869e-05	5.20564	5673	5851	4261	4748
ATP2C1	-0.0210683	6.99609	-0.541221	0.595631	0.802911	-7.36473	3508	3422	2987	3409
ATP5A1	0.0154111	10.0066	0.674961	0.509104	0.746204	-7.80164	27926	27199	25278	26859
ATP5B	0.0245047	10.3278	1.12815	0.27549	0.554208	-7.43564	34514	34139	31717	33628
ATP5C1	-0.00602365	7.71434	-0.190209	0.85148	0.939149	-7.64911	5711	5627	5064	5504
ATP5D	-0.0679148	7.23312	-1.88612	0.0771134	0.278061	-5.86813	4151	4145	3614	3793
ATP5E	0.217339	6.02501	2.59515	0.0192542	0.122147	-4.27719	1611	1650	1482	2100
ATP5F1	0.0111796	7.9885	0.331524	0.744447	0.884166	-7.66151	6651	6983	6157	6699
ATP5G1	0.00802043	6.96181	0.205056	0.840051	0.933432	-7.48823	3420	3276	3080	3221
ATP5G2	-0.0224277	7.40009	-0.637421	0.532648	0.76211	-7.39408	4523	4649	4031	4421
ATP5G3	0.105809	8.16429	3.53463	0.00266624	0.0324205	-2.83617	7437	7460	7278	7724
ATP5H	-0.00826053	5.89559	-0.124286	0.902599	0.963875	-7.20557	1743	1485	1372	1627
ATP5I	0.240729	4.12747	1.77861	0.0938421	0.311594	-5.12269	427	442	376	603
ATP5J	0.0958715	6.6854	2.22375	0.0405358	0.191715	-5.1572	2786	2581	2555	2811
ATP5J2	0.25361	6.40918	4.2157	0.00062459	0.0114697	-1.01477	2039	2161	2078	2622
ATP5L	0.112406	6.54714	2.3633	0.030764	0.16329	-4.8649	2524	2327	2276	2633
ATP5O	-0.0655641	6.52331	-1.39005	0.183091	0.449936	-6.43157	2530	2535	2274	2259
ATP5S	-0.115306	4.72205	-1.49194	0.154697	0.414003	-5.73883	759	719	641	637
ATP5SL	-0.0217953	6.20705	-0.477707	0.639163	0.830042	-7.18739	2014	1995	1785	1911
ATP6AP1	-0.00550161	6.35922	-0.11912	0.906627	0.965273	-7.34366	2166	2265	2004	2126
ATP6AP2	0.0962608	6.08823	1.90175	0.0749161	0.274118	-5.54767	1732	1815	1661	1888
ATP6V0A1	-0.0780809	6.62913	-1.93011	0.071071	0.266973	-5.65134	2751	2727	2339	2518
ATP6V0A2	-0.269935	6.14125	-5.71202	2.91742e-05	0.00117597	2.1639	2083	2093	1530	1712
ATP6V0B	0.102687	6.12974	2.10966	0.0505834	0.217953	-5.20667	1779	1862	1751	1907
ATP6V0C	-0.571035	3.52743	-3.20975	0.00532742	0.0521197	-2.3117	401	352	308	186
ATP6V0D1	-0.0344158	6.88614	-0.909065	0.37648	0.644245	-7.06552	3255	3194	2816	3078
ATP6V0E1	-0.118481	5.86009	-2.28552	0.0358996	0.176894	-4.81109	1619	1642	1321	1491
ATP6V0E2	0.0660541	1.7265	0.307859	0.762064	0.894406	-5.77814	80	94	78	92
ATP6V1A	0.00216237	6.62482	0.0459995	0.963866	0.984889	-7.42383	2562	2756	2335	2648
ATP6V1B2	0.0134999	7.85029	0.4296	0.673077	0.848006	-7.59674	6295	6081	5593	6099
ATP6V1C1	-0.0973083	8.22512	-3.00278	0.00825262	0.0697023	-3.95859	8407	8262	7206	7376
ATP6V1C2	0.391584	0.00545536	0.951905	0.354963	0.624025	-5.01707	18	30	19	42
ATP6V1D	-0.080882	4.90202	-1.10626	0.284575	0.563232	-6.27454	870	787	714	751
ATP6V1E1	0.089558	5.98068	1.74261	0.100116	0.32259	-5.77019	1605	1694	1568	1716
ATP6V1E2	-0.114763	2.59114	-0.731961	0.474522	0.723112	-5.83654	176	161	142	149
ATP6V1F	0.0620598	5.27877	0.980844	0.340916	0.612038	-6.52664	994	1053	961	1038
ATP6V1G1	0.0546636	5.76817	0.936225	0.362738	0.632144	-6.72402	1375	1509	1334	1466
ATP6V1H	0.0500293	5.79003	0.931563	0.365072	0.634342	-6.73515	1515	1415	1370	1468
ATP7A	-0.133968	5.64957	-2.43004	0.026915	0.151001	-4.47963	1413	1418	1183	1232
ATP7B	0.100999	8.19956	3.42344	0.00338042	0.0382222	-3.07771	7605	7688	7376	7975
ATP8A1	-0.0570314	0.258889	-0.161022	0.874043	0.951181	-5.43085	40	26	34	25
ATP8B2	-0.788451	3.98865	-8.03759	4.39307e-07	4.5335e-05	6.68734	552	571	295	313
ATP8B3	-0.204164	5.06714	-2.83492	0.0117318	0.0876354	-3.51583	924	1017	738	837
ATP9A	0.1992	1.5824	0.798724	0.435864	0.692773	-5.4803	60	93	84	77
ATP9B	0.0390179	4.96753	0.572297	0.574881	0.787678	-6.74667	820	842	773	825
ATPAF1	-0.0265559	6.27399	-0.588598	0.564149	0.780554	-7.14541	2135	2073	1834	2033
ATPAF2	-0.0323821	5.04337	-0.406074	0.689937	0.85656	-6.85531	958	839	843	802
ATPIF1	0.0360165	6.64713	0.795874	0.437473	0.693862	-7.10248	2705	2624	2556	2560
ATR	0.0989798	6.40876	2.16383	0.045557	0.204924	-5.19025	2228	2192	2194	2238
ATRAID	-0.0303624	4.89276	-0.391633	0.700371	0.861242	-6.81123	799	820	662	825
ATRIP	0.20856	4.82644	2.94962	0.00922843	0.0752449	-3.21509	715	706	739	798
ATRN	-0.0405789	6.23411	-0.737732	0.4711	0.720869	-7.03205	2013	2096	1902	1841
ATRX	-0.05846	6.27396	-1.2779	0.219075	0.494836	-6.50414	2113	2142	1803	2022
ATXN1	-0.186627	1.3508	-0.76138	0.457238	0.708779	-5.44378	75	71	50	71
ATXN10	-0.0201371	7.25312	-0.572834	0.574526	0.787546	-7.40394	4119	4157	3650	3989
ATXN1L	-0.0628548	6.06886	-1.32137	0.204514	0.477663	-6.39015	1866	1830	1576	1736
ATXN2	0.092825	5.75687	1.61544	0.125285	0.365463	-5.89421	1395	1423	1413	1402
ATXN2L	0.00911696	7.87571	0.295802	0.771093	0.899496	-7.65239	6313	6300	5708	6172
ATXN3	0.0146596	4.47593	0.178984	0.860143	0.943512	-6.73211	615	578	526	602
ATXN7	0.0812912	5.41822	1.30075	0.211322	0.485234	-6.21574	1113	1124	1112	1105
ATXN7L1	-0.167096	4.29169	-1.95417	0.0679485	0.260537	-4.89328	566	551	450	481
ATXN7L2	0.00938851	4.22062	0.105358	0.917369	0.969192	-6.65497	491	510	440	503
ATXN7L3	-0.187884	6.38901	-4.28465	0.00053982	0.0102947	-0.861381	2427	2390	1927	2031
ATXN7L3B	0.0770573	6.46777	1.77565	0.0943449	0.312261	-5.85862	2305	2336	2233	2349
AUH	0.0780118	4.03312	0.782603	0.445013	0.70041	-6.28364	461	399	397	451
AUNIP	-0.0499746	4.24033	-0.547622	0.591326	0.799359	-6.51197	545	492	434	503
AUP1	0.0340411	7.31092	0.954888	0.353497	0.623149	-7.11862	4300	4153	3944	4155
AURKA	0.0400074	7.03023	0.91084	0.375571	0.643723	-7.09846	3619	3334	3097	3596
AURKAIP1	-0.0665812	6.50992	-1.58764	0.131456	0.376907	-6.15419	2547	2477	2155	2335
AURKB	0.106636	6.81124	2.72051	0.0148779	0.103536	-4.24571	2909	2920	2853	3021
AURKC	0.039201	4.3629	0.452102	0.657117	0.83869	-6.6037	524	570	498	553
AVEN	-0.101266	4.12385	-1.11979	0.278934	0.557643	-5.9971	489	483	404	444
AVIL	0.311099	1.56131	1.39515	0.181577	0.448701	-4.89541	68	74	76	89
AVL9	0.0548981	5.94873	1.0527	0.307741	0.584092	-6.66437	1635	1627	1576	1597
AVPI1	-0.436211	2.62382	-2.7542	0.0138754	0.0982678	-2.9924	187	199	120	147
AXIN1	-0.0416108	5.92672	-0.763578	0.455963	0.707791	-6.92068	1724	1604	1400	1627
AXL	-1.03998	4.67386	-12.5518	7.87885e-10	2.93904e-07	12.766	1020	950	453	444
AZI1	-0.119269	4.58545	-1.51249	0.149438	0.407125	-5.66472	657	691	549	612
AZI2	0.0849793	4.64556	1.07171	0.299367	0.576892	-6.22616	691	619	627	672
AZIN1	0.0567805	9.25707	2.15363	0.0464667	0.20714	-5.7678	16360	15959	15377	16078
AZU1	-0.835746	1.22113	-3.32779	0.00414486	0.0437944	-1.84119	88	79	42	45
B2M	0.0266268	7.89335	0.752009	0.462701	0.713644	-7.40754	6606	6094	5834	6265
B3GALNT1	0.170904	0.832096	0.5857	0.566049	0.781684	-5.42266	49	41	38	58
B3GALNT2	0.186969	4.5115	2.28543	0.0359059	0.176894	-4.39195	558	594	574	653
B3GALT4	0.388399	-0.0422338	1.09004	0.291452	0.569822	-4.89928	20	25	27	28
B3GALT6	0.00116596	5.6527	0.0201566	0.984162	0.993603	-7.13764	1390	1321	1171	1370
B3GALTL	-0.237207	2.55585	-1.24767	0.229671	0.505909	-5.34143	206	142	144	129
B3GAT3	0.15365	4.53168	1.93775	0.0700658	0.265365	-5.00034	596	584	604	625
B3GNT1	-0.0736643	3.14258	-0.569503	0.576732	0.788387	-6.12338	238	249	213	220
B3GNT2	-0.0232564	4.94429	-0.32855	0.746653	0.885865	-6.85236	871	801	749	790
B3GNT5	0.0128782	5.34752	0.20575	0.839518	0.933174	-7.01826	1140	1045	982	1080
B3GNT9	-0.0140299	1.37305	-0.0583019	0.954213	0.9817	-5.719	63	77	61	68
B3GNTL1	-0.320994	3.01224	-2.36096	0.0309078	0.163376	-3.80359	252	233	177	186
B4GALT1	-0.279165	5.4284	-4.449	0.00038181	0.00788714	-0.250866	1246	1308	980	990
B4GALT2	0.0372288	6.36982	0.800384	0.434928	0.692084	-7.02232	2278	2121	2054	2169
B4GALT3	-0.0448406	5.16458	-0.660065	0.518375	0.753167	-6.75495	970	990	896	884
B4GALT4	-0.0306799	2.94589	-0.221158	0.827699	0.92944	-6.1965	206	213	177	207
B4GALT5	-0.122214	5.07545	-1.60486	0.127604	0.369537	-5.69422	902	997	738	895
B4GALT7	-0.0159581	4.44585	-0.180364	0.859077	0.942981	-6.7212	612	570	489	607
B9D1	0.0481973	3.97789	0.484454	0.63447	0.826802	-6.45631	410	425	366	443
B9D2	-0.241488	2.75454	-1.62832	0.122511	0.361322	-4.91268	199	195	156	156
BABAM1	0.0327196	5.31573	0.538676	0.597346	0.803734	-6.87896	1069	1051	991	1039
BACE1	0.10063	2.48492	0.587796	0.564675	0.78102	-5.89671	148	143	124	170
BACH1	-0.148326	6.38459	-3.21698	0.00524626	0.051621	-3.12277	2454	2286	1933	2068
BAD	0.0693563	2.67369	0.454668	0.655308	0.838624	-6.02688	163	172	152	177
BAG1	0.068464	6.83325	1.78495	0.0927736	0.309038	-5.93987	3030	2969	2814	3074
BAG2	0.103666	6.82793	2.36185	0.0308531	0.163344	-4.94002	3093	2816	2877	3060
BAG3	-0.246591	5.73579	-4.67582	0.000237601	0.00557232	0.141711	1572	1554	1189	1277
BAG4	0.067722	5.55185	1.09732	0.288351	0.566168	-6.49407	1184	1285	1190	1230
BAG5	-0.0813048	6.06412	-1.53402	0.144085	0.398845	-6.10377	1924	1783	1627	1652
BAG6	-0.0381651	8.71007	-1.33564	0.199907	0.472014	-6.94801	11371	11488	10175	10657
BAHD1	-0.169553	6.1286	-3.61964	0.00222345	0.0283648	-2.20603	2027	1970	1597	1729
BAIAP2	-0.897189	4.11168	-8.61279	1.73674e-07	2.20016e-05	7.58096	688	586	305	333
BAIAP2-AS1	-1.13988	1.54267	-4.90707	0.000147228	0.00390562	0.918185	111	121	50	48
BAIAP2L2	0.00510882	2.69425	0.0336363	0.973573	0.988785	-6.13688	180	167	163	163
BAK1	0.0833609	4.76304	1.02834	0.318718	0.593065	-6.31062	670	754	652	758
BANF1	-0.128511	7.10138	-3.05803	0.00734535	0.0651162	-3.62968	4055	3687	3190	3432
BANP	0.11773	4.19161	1.29963	0.211696	0.485716	-5.81282	464	481	444	516
BAP1	-0.0847346	7.61816	-2.48299	0.0241892	0.141255	-4.88029	5497	5406	4508	5121
BARD1	0.0524445	4.94987	0.7719	0.451152	0.70489	-6.60375	816	818	766	820
BAX	-0.0197925	6.28678	-0.399941	0.69436	0.85816	-7.2462	2157	2075	1955	1954
BAZ1A	0.0800127	7.46869	2.25303	0.0382731	0.184744	-5.28078	4778	4508	4363	4823
BAZ1B	-0.0140128	7.85789	-0.445747	0.661608	0.842015	-7.59068	6250	6308	5618	6021
BAZ2A	-0.158077	7.17305	-4.16506	0.000695336	0.0123854	-1.30359	4026	4187	3330	3557
BAZ2B	-0.047813	3.94385	-0.454007	0.655774	0.83869	-6.45883	391	453	375	387
BBC3	-0.31388	4.12988	-3.3326	0.00410262	0.04353	-2.22669	554	498	379	412
BBIP1	-0.286618	2.83152	-1.85079	0.0822937	0.289046	-4.60513	222	202	138	189
BBS10	0.0571406	3.52948	0.512731	0.614975	0.815435	-6.2878	309	300	284	309
BBS12	-0.247877	2.22832	-1.37685	0.187063	0.45621	-5.09166	143	131	110	106
BBS2	-0.0701124	4.02443	-0.736934	0.471573	0.720893	-6.31468	449	449	370	431
BBS4	-0.095789	4.68177	-1.20224	0.246338	0.524129	-6.09313	692	736	627	624
BBS5	-0.00140575	2.46387	-0.00830199	0.993476	0.997518	-6.06111	149	148	120	159
BBS7	0.0721123	3.81558	0.57496	0.573121	0.786973	-6.35184	408	336	309	425
BBS9	0.465827	1.72404	2.12063	0.0495263	0.215246	-3.91559	68	83	101	94
BBX	0.171235	5.99943	3.3022	0.00437689	0.0455865	-2.83918	1573	1676	1644	1778
BCAP29	-0.0232934	5.95791	-0.440455	0.665357	0.843811	-7.13086	1640	1738	1463	1647
BCAP31	-0.00636313	6.87051	-0.154926	0.87877	0.953199	-7.47545	3207	3108	2909	2976
BCAR1	-0.154133	6.29061	-3.34392	0.00400488	0.0428256	-2.83196	2289	2161	1786	1956
BCAR3	-0.352971	0.235576	-1.05721	0.305737	0.582393	-4.97103	33	38	22	30
BCAS2	0.0983192	5.84417	1.88016	0.0779672	0.279597	-5.51019	1517	1475	1402	1597
BCAS3	0.0567029	2.51501	0.356101	0.726304	0.874679	-6.01475	152	149	140	153
BCAT1	0.0617968	8.51513	2.2132	0.0413809	0.193939	-5.54283	9756	9536	9117	9727
BCAT2	-0.056344	6.25152	-1.06753	0.301192	0.578405	-6.73789	2002	2189	1769	2000
BCCIP	0.0643279	7.2681	1.4967	0.153466	0.41216	-6.4684	4294	3839	3797	4152
BCDIN3D	-0.0770019	1.74449	-0.346048	0.733706	0.878717	-5.77103	96	88	92	73
BCKDHB	-0.158685	5.4483	-2.52454	0.0222353	0.13438	-4.2389	1288	1196	1039	1044
BCKDK	-0.0478702	5.6178	-0.865111	0.399454	0.665846	-6.74086	1345	1343	1189	1245
BCL10	0.0110989	3.94413	0.112884	0.911492	0.967448	-6.55923	402	423	383	395
BCL11A	0.0935646	4.84969	1.2478	0.229624	0.505909	-6.09703	728	777	693	810
BCL2	0.403924	1.90327	1.68134	0.111637	0.343727	-4.60796	109	70	87	133
BCL2L1	-0.0679297	7.01526	-1.80106	0.0901056	0.304336	-5.95727	3629	3508	3011	3363
BCL2L11	0.171143	6.28776	3.26448	0.00474258	0.0481038	-2.99862	2096	1874	2053	2126
BCL2L12	-0.0647887	6.38808	-1.3066	0.209371	0.48333	-6.50103	2310	2300	2081	2048
BCL2L13	0.0109833	6.12651	0.22377	0.8257	0.928574	-7.2571	1880	1871	1642	1898
BCL2L2	0.0349624	4.3005	0.39632	0.696977	0.859859	-6.60663	533	514	505	500
BCL3	-2.35926	0.216951	-6.61374	5.25675e-06	0.000309301	2.0236	71	70	11	14
BCL7A	-0.0563936	5.87437	-1.11826	0.279566	0.558458	-6.57104	1609	1613	1391	1509
BCL7B	-0.101698	5.10949	-1.54517	0.14138	0.394651	-5.79113	985	942	787	894
BCL7C	-0.238405	4.61918	-3.0093	0.00814008	0.0689509	-3.02867	744	693	564	576
BCL9	-0.0198191	3.52177	-0.153637	0.87977	0.953505	-6.40731	277	349	285	289
BCL9L	-0.417572	2.96754	-2.92457	0.00972658	0.0776562	-2.74372	239	248	150	192
BCLAF1	-0.0346905	9.04831	-1.26309	0.224217	0.50071	-7.09284	14426	14437	12920	13447
BCOR	0.0232173	6.62987	0.559457	0.583409	0.793445	-7.2625	2612	2681	2403	2631
BCORL1	-0.116945	4.24929	-1.29472	0.213346	0.487429	-5.83689	555	511	458	462
BCR	-0.0415462	6.09306	-0.744302	0.467224	0.717539	-6.9856	1958	1779	1558	1841
BCRP3	-0.791404	0.958892	-2.90156	0.0102069	0.0798248	-2.57438	68	69	32	42
BCS1L	0.142857	6.3326	3.13996	0.0061771	0.0577041	-3.26957	2035	2098	2021	2250
BDH1	0.196416	5.66846	3.06726	0.00720356	0.0641091	-3.22869	1246	1317	1237	1516
BDH2	-0.0672381	1.77604	-0.296384	0.770656	0.899304	-5.79599	80	110	88	80
BDP1	0.00893911	7.11739	0.243077	0.810959	0.92193	-7.51512	3689	3768	3380	3642
BECN1	-0.00519232	5.55719	-0.0929234	0.92709	0.972922	-7.10318	1278	1263	1122	1248
BEGAIN	-0.45497	1.80983	-2.21114	0.0415481	0.194643	-3.78453	109	111	75	75
BEND3	0.16047	5.27634	2.43678	0.0265526	0.149841	-4.35402	1034	941	1019	1046
BET1	-0.0767004	4.02445	-0.809539	0.429793	0.689018	-6.25824	455	445	371	428
BET1L	0.140989	5.48487	2.15023	0.0467738	0.207837	-4.941	1159	1135	1213	1159
BEX4	-0.332909	1.3559	-1.39384	0.181963	0.449301	-4.84846	82	72	56	58
BFAR	0.103515	6.16965	2.15473	0.0463679	0.206848	-5.13878	1912	1831	1762	2003
BFSP1	0.243045	1.44085	0.956209	0.352849	0.623149	-5.31671	67	67	57	95
BHLHE40	-0.353648	2.29521	-2.04198	0.0575746	0.234853	-4.16123	152	146	104	114
BICD1	0.224504	2.21327	1.19262	0.249984	0.528564	-5.30204	104	127	130	122
BICD2	0.0818225	5.60859	1.49209	0.154659	0.414	-6.0243	1278	1276	1222	1308
BID	-0.00270124	5.16369	-0.0342952	0.973056	0.988583	-6.98044	887	1053	856	949
BIK	-0.338816	2.36069	-1.89897	0.0753024	0.274701	-4.40228	147	163	122	108
BIN1	-1.13811	-0.0456369	-2.96616	0.00891339	0.0734305	-2.5789	31	47	17	15
BIN2	-0.351977	4.07849	-3.80057	0.00151075	0.0216082	-1.24663	516	511	367	386
BIN3	-0.140074	4.49887	-1.73775	0.10099	0.324146	-5.30614	644	633	536	549
BIRC2	0.0865502	5.04048	1.26743	0.222699	0.498793	-6.13598	879	840	847	862
BIRC5	-0.119213	5.84637	-2.13936	0.0477678	0.210895	-5.06934	1656	1572	1392	1391
BIRC6	0.0510488	7.58399	1.53681	0.143404	0.398026	-6.47555	5042	5113	4748	5098
BIVM	0.138629	4.74869	1.82682	0.0859814	0.297012	-5.25138	666	715	670	752
BLCAP	0.14759	5.09424	2.02835	0.0590837	0.2387	-5.03056	930	822	837	978
BLM	0.0084593	6.22881	0.182856	0.857152	0.942397	-7.29588	1990	2039	1803	1990
BLMH	0.0400203	6.96216	1.07103	0.299665	0.577155	-6.92425	3311	3314	3034	3342
BLOC1S1	-0.0830341	2.51505	-0.515906	0.612805	0.814209	-5.94462	153	163	137	142
BLOC1S2	0.0604712	4.88639	0.831412	0.417681	0.679087	-6.5343	793	768	698	827
BLOC1S3	0.150194	4.71423	1.73892	0.100781	0.323891	-5.37743	620	725	692	701
BLOC1S4	0.067959	3.63582	0.552247	0.588226	0.797251	-6.30324	370	288	308	333
BLOC1S5	0.0162929	4.65792	0.18983	0.851772	0.939307	-6.79301	689	665	563	723
BLOC1S6	0.0882807	6.59338	1.89891	0.0753108	0.274701	-5.69429	2434	2613	2447	2571
BLVRA	-0.161565	6.3177	-3.39053	0.00362621	0.0402318	-2.74147	2362	2186	1803	2001
BLVRB	-0.100863	8.23942	-3.0772	0.00705401	0.0631402	-3.80795	8737	8135	7006	7714
BLZF1	0.177671	4.75088	2.35796	0.0310936	0.163502	-4.33664	713	651	699	744
BMI1	0.037885	6.12168	0.775012	0.449362	0.703455	-6.97072	1812	1890	1724	1832
BMP1	-0.199465	4.84855	-2.69402	0.0157146	0.106961	-3.72661	801	863	644	711
BMP2K	0.131757	6.09188	2.59237	0.0193641	0.122429	-4.3024	1806	1707	1672	1932
BMP8B	0.23995	3.42307	1.93834	0.0699892	0.265237	-4.64566	288	244	294	293
BMPR1A	0.104099	4.8829	1.48444	0.156656	0.416346	-5.80376	786	747	733	809
BMPR2	0.102837	5.61417	1.82455	0.0863384	0.29783	-5.52939	1255	1290	1252	1306
BMS1	0.0853716	7.38287	2.51857	0.0225064	0.135377	-4.76657	4369	4360	4166	4502
BMS1P1	-0.667045	-0.0400882	-1.8678	0.0797632	0.283417	-4.07682	34	31	20	18
BMS1P4	-0.0989944	1.50751	-0.433071	0.670604	0.846923	-5.66923	84	74	62	76
BMS1P5	-0.127721	1.58837	-0.549347	0.590169	0.798751	-5.63806	96	74	63	82
BNIP1	0.174696	3.74208	1.57376	0.134633	0.383012	-5.30181	320	358	362	354
BNIP2	-0.0944652	6.52185	-2.19128	0.0431891	0.199663	-5.17131	2617	2500	2118	2368
BNIP3	0.130598	5.20865	1.9346	0.070479	0.26628	-5.22387	1004	901	954	996
BNIP3L	0.0335971	7.99161	1.06511	0.302253	0.579711	-7.13936	6898	6659	6131	6861
BOD1	0.220561	3.78259	1.53275	0.144397	0.399085	-5.3723	324	366	296	468
BOD1L1	0.0211099	6.4672	0.494045	0.627825	0.823662	-7.25387	2349	2382	2163	2330
BOK	-0.455733	2.83289	-3.14013	0.00617479	0.0577041	-2.29852	233	216	144	162
BOLA1	0.120196	3.60242	1.10254	0.286141	0.564416	-5.84175	316	311	299	339
BOLA2B	3.51918	1.02286	2.26867	0.0371126	0.180945	-3.55894	10	26	37	752
BOLA3	0.111695	4.97418	1.3227	0.20408	0.477238	-6.04623	857	776	719	938
BOLA3-AS1	-0.0794336	3.60634	-0.66338	0.516303	0.751366	-6.22378	354	319	314	284
BOP1	0.163848	5.41001	2.17753	0.0443611	0.202253	-4.8693	1156	1009	1169	1102
BORA	0.0121137	5.23521	0.189338	0.852151	0.939478	-6.98552	997	1022	941	965
BPGM	-0.178735	4.41488	-2.10521	0.0510183	0.21894	-4.67777	599	622	504	506
BPHL	0.0781786	3.37243	0.613792	0.547772	0.772809	-6.1761	268	273	283	254
BPNT1	0.155629	4.73175	2.11141	0.0504134	0.217396	-4.772	688	668	665	749
BPTF	-0.0244315	7.17068	-0.682357	0.504536	0.742686	-7.31501	3978	3850	3463	3740
BRAF	0.01038	5.1363	0.148354	0.883872	0.955553	-6.96077	992	896	884	895
BRAP	0.0146388	5.5453	0.260184	0.79796	0.914406	-7.06843	1258	1245	1117	1250
BRAT1	-0.0200696	6.19163	-0.39008	0.701497	0.862114	-7.22259	2081	1889	1722	1940
BRCA1	0.00622979	6.71098	0.136177	0.893339	0.960076	-7.43779	2709	2926	2563	2729
BRCA2	0.068515	6.03924	1.43191	0.17095	0.436104	-6.23819	1732	1727	1631	1764
BRCC3	0.107035	4.97173	1.54342	0.141802	0.395054	-5.75057	819	808	814	827
BRD1	0.0685663	5.89013	1.34416	0.197194	0.468996	-6.30822	1539	1581	1460	1602
BRD2	-0.0225085	8.39054	-0.706469	0.489811	0.733623	-7.5306	8967	9261	7880	8925
BRD3	0.145721	5.56913	2.41595	0.0276879	0.153048	-4.48286	1263	1168	1249	1268
BRD4	0.0608417	8.02568	2.03547	0.0582914	0.236654	-5.77089	6912	6835	6417	7005
BRD7	0.0731485	6.28426	1.58127	0.132905	0.379651	-6.1009	2073	2022	1884	2150
BRD8	0.0145535	6.36978	0.321152	0.752151	0.888081	-7.29989	2180	2254	1982	2210
BRD9	0.0743074	6.41571	1.64028	0.119982	0.356613	-6.05138	2189	2294	2125	2291
BRE	-0.115439	3.85317	-1.00681	0.328649	0.601352	-6.02273	365	449	335	364
BRF1	0.0261519	5.53826	0.46144	0.650543	0.835817	-6.99033	1237	1244	1114	1251
BRF2	0.166447	4.37083	1.86575	0.0800643	0.284243	-5.06456	518	532	564	541
BRI3	-0.10192	4.04408	-1.07428	0.298249	0.576173	-6.01867	461	458	400	402
BRI3BP	0.119967	6.37078	2.64371	0.0174298	0.11383	-4.2811	2110	2168	2046	2306
BRICD5	0.683846	0.847581	2.34439	0.0319454	0.165389	-3.4621	31	46	54	60
BRIP1	-0.0133912	4.73542	-0.14617	0.885569	0.955708	-6.82694	656	793	614	724
BRIX1	0.0136899	6.56357	0.301416	0.766885	0.896758	-7.36036	2464	2608	2337	2453
BRK1	0.0725136	6.27268	1.48483	0.156552	0.416281	-6.23408	2031	2033	1841	2163
BRMS1	-0.054237	5.54292	-0.936387	0.362657	0.632144	-6.65273	1321	1238	1121	1185
BRMS1L	-0.0523017	3.30047	-0.42449	0.676724	0.849561	-6.25026	269	270	245	242
BROX	0.0678159	5.2952	0.930919	0.365395	0.6344	-6.57945	961	1111	953	1074
BRPF1	0.0463217	5.66541	0.83808	0.414032	0.677056	-6.77951	1388	1303	1247	1353
BRPF3	-0.0613027	5.76531	-1.10344	0.285761	0.564115	-6.55352	1559	1435	1303	1381
BRWD1	0.0286835	6.87914	0.713047	0.485838	0.731597	-7.22563	3093	3188	2823	3175
BRWD3	0.0367099	5.62719	0.593637	0.560853	0.778848	-6.94619	1292	1334	1279	1245
BSCL2	-0.0143803	0.452367	-0.0456649	0.964129	0.984914	-5.485	35	38	37	31
BSDC1	-0.236142	6.43002	-4.62802	0.000262482	0.00602349	-0.143423	2451	2588	2010	1995
BSG	-0.195812	9.81744	-8.3885	2.48182e-07	2.87961e-05	6.44211	26333	25691	20609	21894
BSN	0.206531	1.86499	1.01787	0.323519	0.597159	-5.37654	89	93	88	109
BSPRY	-0.123533	3.56073	-0.946756	0.357503	0.626805	-5.98094	321	344	237	339
BST2	-0.0827688	6.49276	-1.83803	0.0842384	0.293687	-5.76528	2553	2438	2176	2235
BTAF1	0.0233392	7.12505	0.638987	0.531654	0.761917	-7.3347	3805	3655	3417	3678
BTBD1	0.000452597	6.63398	0.0109268	0.991414	0.996824	-7.4273	2709	2639	2444	2563
BTBD10	0.0531568	4.57264	0.615512	0.546663	0.77225	-6.58628	586	675	587	634
BTBD2	-0.18754	5.70503	-3.2743	0.00464456	0.0473029	-2.81006	1538	1459	1228	1236
BTBD3	0.101262	4.97382	1.46382	0.162143	0.424776	-5.86164	847	788	777	864
BTBD6	0.194428	4.90745	2.58622	0.0196092	0.123452	-3.95622	806	708	763	856
BTBD7	0.107258	5.86054	1.94563	0.0690433	0.26306	-5.40721	1458	1558	1488	1551
BTBD9	0.225883	2.10412	1.17977	0.25492	0.533316	-5.28358	102	111	123	111
BTD	-0.0131983	3.21748	-0.098242	0.922931	0.97128	-6.3091	276	229	213	254
BTF3	0.0540553	8.72998	1.93263	0.0707391	0.266601	-6.06626	11147	11308	10322	11505
BTF3L4	-0.0307513	6.07942	-0.623921	0.54126	0.768498	-7.06617	1824	1856	1657	1715
BTF3L4P2	0.210097	2.0339	0.894699	0.38389	0.65038	-5.53534	112	94	81	149
BTG1	-0.151884	2.75568	-1.00917	0.327549	0.600757	-5.65597	181	202	158	164
BTG2	-0.87044	3.53108	-6.70069	4.48217e-06	0.000274119	4.44864	383	462	207	223
BTG3	0.104846	4.80471	1.35889	0.192577	0.463251	-5.94447	774	680	697	764
BTK	-0.0770057	6.86406	-1.95988	0.0672263	0.258795	-5.66161	3236	3207	2798	2919
BTN2A1	0.226298	4.21397	2.53723	0.0216689	0.132375	-3.83229	456	467	499	512
BTN2A2	0.0587946	1.44929	0.223892	0.825606	0.928574	-5.71852	91	56	74	66
BTN3A1	0.171447	2.43759	1.01573	0.324508	0.598184	-5.5516	127	148	136	153
BTN3A2	0.150991	4.49678	1.70482	0.107092	0.3349	-5.3571	537	620	565	634
BTNL9	0.0224843	6.00992	0.443084	0.663493	0.843081	-7.14584	1719	1727	1521	1757
BTRC	-0.104568	5.06643	-1.56669	0.136274	0.385472	-5.74673	966	906	776	853
BUB1	0.0449661	7.7746	1.2073	0.24444	0.522052	-6.94054	5641	5976	5486	5724
BUB1B	-0.0221944	7.04692	-0.411277	0.686193	0.854398	-7.44121	3641	3530	3438	3185
BUB3	0.0589571	8.06018	1.92212	0.0721358	0.269262	-5.96872	6987	7101	6629	7105
BUD13	-0.101106	4.99619	-1.4459	0.167043	0.4316	-5.8919	912	867	773	780
BUD31	-0.0071158	4.90893	-0.102172	0.919859	0.970263	-6.89157	821	800	740	770
BX322557.10	-0.0612163	1.47095	-0.265216	0.794148	0.912311	-5.71465	71	81	63	73
BYSL	-0.0527628	6.78918	-1.32111	0.204599	0.477708	-6.59058	3094	2976	2588	2890
BZRAP1	0.274103	2.33556	1.49987	0.15265	0.411541	-4.96898	122	125	117	165
BZRAP1-AS1	-0.239417	1.2314	-0.944572	0.358585	0.627991	-5.2728	73	64	46	63
BZW1	-0.0374729	8.11822	-1.14374	0.269148	0.547603	-7.07658	7823	7347	6714	7113
BZW1P2	0.300192	1.91867	1.21949	0.239905	0.518346	-5.1872	72	115	121	92
BZW2	0.0477557	6.86924	1.20331	0.245938	0.523546	-6.75432	3072	3121	2928	3063
C10orf118	0.0742009	4.07528	0.79675	0.436977	0.693566	-6.28673	434	450	426	445
C10orf12	0.123623	4.09707	1.1223	0.277896	0.556363	-5.98654	393	496	423	477
C10orf2	0.0678533	6.71442	1.47861	0.158191	0.418483	-6.36382	2828	2695	2714	2706
C10orf32	-0.102244	3.70131	-0.969351	0.346448	0.616661	-6.00784	358	367	307	325
C10orf35	0.28523	0.686512	0.949133	0.356329	0.625629	-5.1475	44	34	48	41
C10orf76	0.0166433	5.29414	0.217317	0.830641	0.930234	-6.99857	1023	1075	1044	949
C10orf88	0.245431	3.67618	2.29517	0.0352216	0.176028	-4.11463	328	304	335	366
C10orf95	-0.366717	0.0166676	-1.04293	0.312108	0.588164	-4.94647	33	28	23	21
C11orf1	-0.152253	2.96208	-1.10595	0.284706	0.563232	-5.62466	229	213	175	197
C11orf21	-0.603	6.61738	-12.8458	5.57089e-10	2.56158e-07	13.1937	3153	3371	1897	2121
C11orf24	0.0511495	5.4446	0.863925	0.400087	0.666364	-6.68755	1162	1141	1101	1133
C11orf30	-0.0749373	4.44037	-0.915531	0.373177	0.641156	-6.30837	590	610	506	560
C11orf31	-0.0124461	5.901	-0.215645	0.831923	0.930731	-7.19085	1536	1701	1439	1560
C11orf48	0.0244147	4.67216	0.31985	0.75312	0.888636	-6.76337	676	686	602	695
C11orf49	-0.0625337	4.05629	-0.6759	0.508523	0.746016	-6.36916	461	454	393	427
C11orf54	0.0668295	3.88223	0.636305	0.533357	0.762515	-6.33696	372	405	344	418
C11orf57	0.149107	5.72441	2.68373	0.0160518	0.108214	-4.01569	1314	1391	1357	1449
C11orf58	0.0365558	7.62262	0.854869	0.404938	0.669401	-7.27227	5419	5064	5066	4996
C11orf68	-0.111627	4.695	-1.49894	0.152889	0.411678	-5.7201	721	729	595	661
C11orf73	-0.0335845	4.90466	-0.482304	0.635963	0.828131	-6.77412	804	828	715	777
C11orf74	0.27897	2.73969	1.70918	0.106267	0.333664	-4.79422	142	187	175	195
C11orf80	-0.230529	1.16994	-0.87026	0.396716	0.663241	-5.31783	56	76	47	57
C11orf82	-0.0333725	5.31635	-0.464325	0.648518	0.835182	-6.91752	1110	1058	1030	958
C11orf83	0.127125	3.71648	1.21497	0.241578	0.519972	-5.75552	346	331	328	364
C11orf84	-0.0425518	3.29145	-0.313208	0.75807	0.891657	-6.28914	264	269	264	224
C11orf95	-0.776729	3.7411	-6.79389	3.78253e-06	0.000237172	4.62064	441	503	249	265
C11orf96	0.146205	1.81126	0.64853	0.525618	0.757728	-5.64766	81	98	105	82
C12orf10	0.0438784	5.12299	0.655712	0.521102	0.754217	-6.74502	915	932	887	896
C12orf23	0.00900535	4.26759	0.0941683	0.926116	0.972487	-6.67219	481	556	454	520
C12orf29	0.178817	5.67564	3.15583	0.00597284	0.0563471	-3.04877	1342	1246	1341	1400
C12orf4	0.0576243	5.57561	1.03535	0.315528	0.590734	-6.56667	1267	1250	1192	1260
C12orf43	0.118515	4.65739	1.57927	0.133364	0.380187	-5.59583	650	654	634	691
C12orf44	0.0351978	4.2496	0.378235	0.710106	0.866548	-6.59642	509	501	499	472
C12orf45	0.420035	3.48171	3.63471	0.002153	0.0277565	-1.44857	272	248	307	344
C12orf49	-0.00138359	4.39429	-0.0165846	0.986968	0.995306	-6.72034	554	579	505	554
C12orf57	0.113706	1.45969	0.469665	0.644777	0.833237	-5.64086	62	81	63	81
C12orf60	-0.171493	1.60195	-0.768458	0.453138	0.70641	-5.50655	83	90	63	81
C12orf65	0.16463	4.7828	2.06926	0.0546571	0.228167	-4.8611	707	691	754	716
C12orf66	0.00936997	2.8609	0.0560315	0.955994	0.981774	-6.19148	180	209	207	163
C12orf73	0.211265	3.18625	1.60229	0.128173	0.370586	-5.08266	216	240	224	270
C12orf75	-0.216577	2.67858	-1.36368	0.191093	0.461739	-5.24099	198	173	155	144
C12orf76	-0.194833	1.37033	-0.723228	0.479727	0.726584	-5.47465	79	70	44	82
C14orf1	0.0417837	5.18114	0.560272	0.582866	0.793191	-6.82337	982	941	964	894
C14orf119	-0.0997733	5.76021	-1.79111	0.0917453	0.307096	-5.62642	1552	1469	1308	1331
C14orf142	0.0875668	3.2563	0.662761	0.51669	0.751576	-6.10512	276	225	235	261
C14orf159	-0.0237127	5.31705	-0.314378	0.757197	0.891137	-6.97866	1188	985	968	1025
C14orf166	-0.0537739	6.90894	-1.39675	0.181101	0.448061	-6.52257	3355	3240	2885	3061
C14orf2	0.252312	5.93833	4.5473	0.000310697	0.0067008	-0.185857	1523	1506	1538	1844
C14orf28	-0.251652	1.03692	-0.953433	0.354211	0.623508	-5.21946	56	64	43	51
C14orf37	-0.626223	0.810659	-1.82496	0.0862732	0.29777	-4.2065	66	52	22	55
C14orf39	0.142567	0.94437	0.528573	0.604181	0.808549	-5.47839	53	45	48	53
C14orf79	-0.0482375	3.39596	-0.366114	0.718959	0.870223	-6.30668	273	305	224	301
C14orf80	-0.0698164	5.10521	-1.03207	0.317017	0.592104	-6.419	933	965	841	852
C14orf93	-0.256948	3.43913	-1.85865	0.0811148	0.28658	-4.77526	329	307	281	223
C15orf27	0.183355	0.609151	0.570849	0.57584	0.788128	-5.37856	32	45	47	35
C15orf39	-0.0942561	4.93341	-1.34668	0.196397	0.468628	-6.00135	833	868	703	788
C15orf40	0.0362178	3.66171	0.335749	0.741317	0.882384	-6.41027	346	327	300	346
C15orf41	0.0822564	3.35465	0.628215	0.538513	0.76635	-6.161	297	240	266	264
C15orf57	-0.0422897	4.18046	-0.465594	0.647628	0.834696	-6.53428	479	512	431	469
C15orf61	0.172419	3.13649	1.20558	0.245084	0.522496	-5.57388	252	197	214	257
C15orf62	0.429831	0.21531	1.20838	0.244033	0.521951	-4.83361	20	35	31	36
C16orf13	0.0418736	5.31621	0.677969	0.507243	0.74517	-6.79194	1044	1070	999	1038
C16orf46	0.0200873	0.419397	0.0529797	0.958388	0.982526	-5.47713	28	45	22	50
C16orf52	0.0607555	3.09811	0.462969	0.64947	0.835484	-6.16453	235	216	213	227
C16orf58	0.0964963	4.9761	1.3799	0.186139	0.454457	-5.97389	848	791	807	833
C16orf59	-0.0050532	4.83059	-0.0643378	0.949479	0.980525	-6.86852	775	762	639	798
C16orf62	0.0159527	5.98773	0.287198	0.777558	0.902522	-7.19858	1793	1612	1505	1715
C16orf70	-0.0116591	4.68774	-0.147567	0.884483	0.955708	-6.81051	667	727	634	659
C16orf72	0.186951	5.57815	2.9299	0.00961837	0.0772394	-3.48128	1155	1257	1285	1284
C16orf80	0.236187	4.84704	2.82494	0.0119783	0.0887197	-3.47043	684	743	815	761
C16orf86	0.223861	0.702858	0.766741	0.45413	0.706608	-5.28531	40	40	47	41
C16orf87	0.134262	3.61556	1.16964	0.258863	0.537355	-5.77313	303	326	331	316
C16orf91	0.0948195	4.45965	1.15753	0.263636	0.542164	-6.06983	582	565	532	615
C16orf93	-0.0976552	1.84473	-0.455905	0.654436	0.838183	-5.75875	87	114	85	89
C16orf95	-0.106414	1.78059	-0.474989	0.641058	0.831199	-5.7308	108	84	91	76
C17orf103	-0.453209	4.49857	-5.5507	4.00969e-05	0.00151057	2.23367	697	727	474	499
C17orf104	0.0838911	5.07224	1.10316	0.28588	0.564261	-6.33464	877	880	906	842
C17orf107	-0.196669	0.22124	-0.559523	0.583365	0.793445	-5.29955	42	26	28	26
C17orf51	0.165432	3.37236	1.38827	0.183623	0.450708	-5.43062	273	253	269	283
C17orf53	-0.100413	4.49328	-1.20091	0.246841	0.524569	-6.03075	601	656	521	575
C17orf58	0.142566	4.31347	1.59253	0.130352	0.374439	-5.46208	500	520	478	577
C17orf59	-0.114824	2.87301	-0.804072	0.432855	0.690821	-5.87365	215	195	173	181
C17orf62	-0.15588	5.325	-2.28264	0.0361042	0.177307	-4.65258	1115	1167	863	1057
C17orf67	0.427865	1.21347	1.67714	0.112466	0.345093	-4.46831	55	52	57	79
C17orf70	0.0204222	6.36516	0.430436	0.672481	0.847771	-7.2556	2137	2275	1993	2193
C17orf72	-0.771212	0.371843	-2.35473	0.0312942	0.164001	-3.43265	52	39	23	26
C17orf75	0.0477467	3.95231	0.439201	0.666247	0.844285	-6.46906	450	372	399	394
C17orf80	-0.0865552	4.83127	-1.15868	0.263178	0.541917	-6.19307	758	823	668	724
C17orf85	-0.0182142	5.99324	-0.371414	0.715083	0.868531	-7.17102	1760	1693	1537	1654
C17orf89	-0.0134605	5.177	-0.203412	0.841315	0.934251	-6.96355	996	963	835	983
C17orf96	0.287467	5.47495	4.71217	0.000220305	0.00528008	0.286334	1107	1063	1141	1340
C17orf97	0.222762	1.43072	0.908225	0.376911	0.644401	-5.35442	77	58	63	84
C17orf99	-1.01195	2.00182	-4.29854	0.000524208	0.0100433	-0.0337761	133	174	85	59
C18orf21	0.119836	4.48253	1.48956	0.155317	0.414844	-5.66311	580	575	550	625
C18orf25	-0.0881288	5.53564	-1.39979	0.180205	0.446873	-6.12516	1346	1230	1134	1134
C18orf54	0.0471745	4.1879	0.518083	0.611318	0.813081	-6.51079	491	475	428	507
C18orf56	0.193885	0.455409	0.609436	0.550585	0.774123	-5.32488	29	40	34	39
C18orf8	0.00307324	4.30995	0.0350492	0.972464	0.988454	-6.69076	514	553	487	513
C19orf10	0.0355663	6.49911	0.738782	0.47048	0.720436	-7.10702	2425	2384	2323	2294
C19orf12	-0.0351544	4.16262	-0.379422	0.709242	0.866448	-6.56578	503	474	408	485
C19orf24	0.00104419	5.82542	0.0202336	0.984101	0.993603	-7.19179	1540	1514	1350	1511
C19orf25	-0.0198869	5.98287	-0.394481	0.698307	0.860181	-7.15858	1751	1681	1484	1685
C19orf26	-0.423743	2.28989	-2.02768	0.0591593	0.238752	-4.18103	139	168	81	137
C19orf40	-0.212894	3.13933	-1.61996	0.124306	0.363976	-5.04083	270	241	194	218
C19orf43	0.0975364	7.24878	1.79896	0.0904498	0.304896	-6.01275	3880	4051	3513	4461
C19orf44	0.10358	3.24437	0.831087	0.417859	0.679198	-5.97632	251	241	229	266
C19orf47	0.0372417	5.30644	0.595274	0.559785	0.778171	-6.84287	1036	1067	995	1025
C19orf48	0.0377893	8.10491	1.10035	0.287067	0.564987	-7.12222	7109	7537	6744	7321
C19orf52	-0.0182636	5.32101	-0.26561	0.793849	0.912311	-6.99479	1131	1035	1015	988
C19orf53	0.0129106	6.60547	0.281131	0.782126	0.905253	-7.37807	2695	2532	2283	2656
C19orf54	-0.0261927	4.35338	-0.309337	0.76096	0.893533	-6.65635	546	565	480	541
C19orf55	0.078873	5.62272	1.43253	0.170775	0.435934	-6.10982	1302	1281	1203	1351
C19orf57	-0.0979156	4.20828	-1.02878	0.318516	0.593065	-6.12066	505	523	464	437
C19orf60	0.0837897	5.83496	1.64094	0.119844	0.356374	-5.88051	1503	1483	1432	1530
C19orf66	-0.228168	2.56175	-1.40225	0.179481	0.446098	-5.15788	160	184	135	139
C19orf68	-0.183246	2.25699	-0.895778	0.383329	0.649786	-5.60131	124	152	89	141
C19orf70	0.0554266	5.78469	1.02995	0.317983	0.593065	-6.63739	1508	1406	1362	1471
C19orf71	-0.0955302	1.69964	-0.416505	0.68244	0.85202	-5.73172	98	82	89	70
C19orf81	-0.336443	1.07905	-1.30315	0.210523	0.484717	-4.89191	64	63	43	51
C19orf82	-0.163429	0.291939	-0.480007	0.637561	0.828808	-5.34956	29	41	24	34
C1D	0.0637871	5.04569	0.933771	0.363966	0.633305	-6.49635	908	833	818	884
C1GALT1	-0.0233373	5.18363	-0.371974	0.714674	0.868293	-6.91491	993	980	872	945
C1GALT1C1	-0.058771	3.55728	-0.475829	0.640472	0.830588	-6.31533	293	357	271	310
C1orf109	-0.105712	5.07863	-1.61547	0.125279	0.365463	-5.68001	963	925	785	857
C1orf112	0.116671	5.14123	1.75027	0.0987518	0.319772	-5.4981	930	894	922	930
C1orf122	-0.0522552	4.09281	-0.556389	0.585456	0.795234	-6.45669	484	451	418	426
C1orf123	0.0343015	4.40264	0.396107	0.697131	0.859859	-6.64187	537	589	527	551
C1orf131	0.109114	5.17128	1.64888	0.11819	0.353882	-5.66151	930	937	941	945
C1orf132	-0.0438795	3.18809	-0.34558	0.734051	0.878717	-6.24274	257	241	212	240
C1orf134	-0.186699	0.38929	-0.572656	0.574644	0.78758	-5.32854	32	43	32	29
C1orf159	0.152283	4.60456	1.81773	0.0874181	0.299683	-5.21822	583	662	622	670
C1orf167	-0.0987043	0.04248	-0.275428	0.786427	0.90781	-5.36299	25	32	20	30
C1orf174	0.0653108	5.41879	1.0673	0.301295	0.578411	-6.48383	1107	1147	1025	1183
C1orf186	-0.0268153	1.46829	-0.11231	0.911941	0.967448	-5.74153	72	78	57	82
C1orf192	-0.513976	1.901	-2.43091	0.0268681	0.150867	-3.43421	132	109	67	91
C1orf198	0.125423	6.132	2.69629	0.0156411	0.10686	-4.11079	1825	1792	1768	1925
C1orf213	-0.353673	0.61642	-1.1326	0.273668	0.552008	-4.97278	53	40	38	30
C1orf216	0.0835353	4.96595	1.14175	0.269951	0.548338	-6.25773	815	818	823	799
C1orf233	0.339882	0.497358	1.05547	0.306509	0.58297	-5.02103	36	31	31	50
C1orf27	0.156714	4.59182	1.90507	0.0744572	0.2734	-5.07375	648	584	592	693
C1orf35	-0.0244554	5.10176	-0.35978	0.723602	0.873034	-6.89307	957	907	855	861
C1orf43	-0.104974	6.82091	-2.54955	0.0211327	0.130176	-4.58124	3097	3219	2674	2821
C1orf50	0.0538757	3.35383	0.427929	0.674269	0.84827	-6.26766	262	277	272	253
C1orf51	0.704005	3.09239	5.13566	9.22476e-05	0.00270107	1.59373	195	165	270	278
C1orf52	-0.0218177	4.39385	-0.244501	0.809875	0.921341	-6.68899	564	578	470	585
C1orf53	-0.0115629	0.652469	-0.0385143	0.969742	0.987642	-5.53242	49	36	37	41
C1orf56	0.604272	0.803212	1.70083	0.107853	0.336261	-4.37025	28	50	71	41
C1orf63	-0.228222	5.71282	-4.14966	0.00071843	0.0126336	-0.963367	1504	1555	1150	1294
C1orf74	-0.15167	2.82833	-1.03862	0.31405	0.590091	-5.65034	192	211	159	180
C1orf85	0.00233608	4.50903	0.0289093	0.977286	0.989964	-6.75988	608	616	569	579
C1orf86	-0.0383155	4.92129	-0.454338	0.655541	0.838624	-6.79322	814	843	654	863
C1QBP	0.051766	8.73473	1.9469	0.0688798	0.262797	-6.0432	11394	11151	10447	11427
C1QL3	-0.321939	0.447473	-1.01195	0.326259	0.59972	-5.04742	39	42	34	27
C1QTNF6	-0.187562	1.04966	-0.637695	0.532474	0.76211	-5.44594	69	50	59	40
C1RL	-0.618152	3.15903	-4.57276	0.000294579	0.00654239	0.49814	320	277	169	194
C1RL-AS1	-0.0778307	3.72612	-0.741785	0.468707	0.718867	-6.20939	376	356	305	344
C20orf112	-1.05892	4.42408	-11.7691	2.04984e-09	5.53234e-07	11.8015	845	826	334	418
C20orf194	0.0126604	2.69558	0.0829167	0.934921	0.97612	-6.13442	170	177	148	180
C20orf196	-0.0133377	2.15563	-0.0714643	0.943892	0.979115	-5.95703	115	125	116	107
C20orf24	-0.0502122	4.47204	-0.568359	0.57749	0.788786	-6.57971	657	562	530	569
C20orf27	-0.0670754	6.98352	-1.72755	0.102847	0.327061	-6.06515	3512	3468	2915	3325
C20orf96	-0.0226502	3.61496	-0.205833	0.839454	0.933174	-6.43005	340	325	282	331
C21orf119	-0.00508322	1.84329	-0.0249629	0.980386	0.991567	-5.85931	93	100	82	98
C21orf2	-0.137884	3.34971	-1.15498	0.264647	0.543343	-5.69896	285	290	238	251
C21orf33	0.0535435	6.76972	1.1544	0.26488	0.543487	-6.78574	2973	2803	2568	3049
C21orf58	-0.0788169	3.69338	-0.647732	0.526122	0.758108	-6.26403	324	394	323	311
C21orf59	-0.0129452	4.06891	-0.138532	0.891507	0.958993	-6.59862	469	439	397	445
C21orf67	-0.245633	2.02434	-1.05836	0.305229	0.582215	-5.38214	151	93	99	89
C21orf91	-0.203562	4.82741	-2.72706	0.0146778	0.102488	-3.65537	799	841	662	671
C22orf23	0.824386	0.486389	2.63717	0.0176656	0.115098	-3.01008	25	31	47	46
C22orf29	0.172148	5.67892	3.2136	0.00528402	0.0518176	-2.93033	1307	1292	1323	1418
C22orf34	0.151589	3.56962	1.37359	0.188054	0.457422	-5.51424	311	295	305	325
C22orf39	-0.0369461	4.00788	-0.379122	0.709461	0.866448	-6.51298	463	415	386	414
C22orf46	0.131779	3.45492	1.12808	0.275519	0.554208	-5.76479	282	282	264	315
C2CD2	0.268489	4.00241	2.81687	0.0121813	0.0897516	-3.23017	406	380	428	458
C2CD2L	-0.201383	4.25546	-2.19119	0.0431973	0.199663	-4.47633	544	560	404	496
C2CD3	0.15369	4.91261	2.20875	0.0417426	0.195192	-4.65871	791	747	770	831
C2CD5	0.00910751	6.21261	0.160295	0.874606	0.951218	-7.29527	1873	2117	1802	1948
C2orf27A	-0.0682338	0.351539	-0.207211	0.838396	0.933146	-5.44399	30	40	33	29
C2orf42	-0.227698	2.94894	-1.57398	0.134581	0.382953	-5.04687	246	205	171	188
C2orf43	-2.7835e-05	4.93515	-0.000400967	0.999685	0.999967	-6.90597	808	840	733	809
C2orf44	0.227725	5.21611	3.36659	0.00381602	0.0418546	-2.47611	881	971	976	1051
C2orf47	-0.0221026	4.59542	-0.278475	0.784128	0.906251	-6.74942	681	632	564	646
C2orf48	-0.112455	0.766669	-0.37651	0.711364	0.866779	-5.49654	41	54	45	37
C2orf49	0.147343	5.07153	2.09723	0.0518062	0.221098	-4.90514	822	901	844	940
C2orf62	-0.502362	-0.119268	-1.39275	0.182288	0.449554	-4.60643	29	29	19	19
C2orf68	0.0130543	4.57814	0.159142	0.8755	0.951476	-6.77091	660	622	550	662
C2orf69	0.039729	5.5916	0.658991	0.519046	0.753167	-6.89292	1227	1337	1186	1278
C2orf76	0.0149938	2.36656	0.085981	0.932522	0.975492	-6.02567	134	141	137	124
C2orf82	-0.0183256	0.425519	-0.0579826	0.954463	0.9817	-5.47822	35	37	28	39
C2orf88	0.108836	5.28811	1.61488	0.125406	0.36556	-5.74851	1011	1013	1040	1006
C3orf17	0.0523897	6.18784	1.00292	0.330467	0.603048	-6.78633	1845	2015	1799	1943
C3orf18	-0.439804	0.955407	-1.41948	0.174485	0.440022	-4.73729	61	59	56	31
C3orf33	0.12054	3.06976	0.832746	0.416949	0.678612	-5.91667	194	242	203	238
C3orf38	0.110317	4.72882	1.48551	0.156375	0.416162	-5.75129	675	699	674	714
C3orf52	0.382491	2.16947	1.97358	0.0655201	0.254994	-4.2415	110	102	108	153
C3orf58	0.180461	4.09112	1.91747	0.0727622	0.270786	-4.89068	440	421	457	457
C3orf62	0.0366174	2.88801	0.254643	0.802164	0.916808	-6.16927	187	206	188	189
C3orf80	0.0137095	4.12942	0.140202	0.890208	0.95866	-6.61922	470	466	459	428
C4orf21	0.069678	5.43581	1.11762	0.279832	0.558898	-6.43528	1120	1154	1118	1117
C4orf27	-0.040592	4.69522	-0.52207	0.608601	0.811577	-6.68247	712	704	587	703
C4orf29	-0.0383628	4.1191	-0.422992	0.677795	0.849896	-6.53281	475	473	409	455
C4orf3	0.0866345	5.09689	1.19337	0.249701	0.52837	-6.24189	853	939	819	961
C4orf32	0.184599	5.16951	2.92884	0.00963978	0.0773551	-3.36107	913	905	924	1010
C4orf33	-0.345864	3.38395	-2.8658	0.0109995	0.0838295	-2.95931	329	304	232	234
C4orf36	0.0826224	2.49293	0.477937	0.639003	0.829921	-5.95708	130	166	140	151
C4orf46	-0.0840809	3.94865	-0.866552	0.398687	0.665353	-6.18486	429	427	352	404
C4orf48	-0.0877742	3.10136	-0.610549	0.549865	0.773655	-6.08505	213	266	196	223
C5AR2	-0.698624	2.95822	-4.96028	0.000131979	0.00356622	1.26135	260	273	142	165
C5orf15	0.0400736	5.23287	0.638323	0.532076	0.76211	-6.79195	991	1007	904	1019
C5orf22	0.154138	5.25869	2.42443	0.0272203	0.151747	-4.3718	958	996	999	1036
C5orf24	0.0337425	5.71212	0.63216	0.535995	0.764324	-6.94863	1385	1406	1275	1399
C5orf28	0.138846	4.04789	1.48136	0.157465	0.417453	-5.53011	419	429	428	446
C5orf30	0.0282182	5.14628	0.426203	0.675501	0.848648	-6.88061	917	972	875	927
C5orf34	0.00634261	2.85469	0.0413047	0.967552	0.986962	-6.19003	201	188	155	213
C5orf42	0.165125	1.5526	0.729476	0.476	0.724126	-5.52111	75	73	82	74
C5orf45	0.0817461	4.7057	1.1027	0.286074	0.564396	-6.21359	677	689	643	710
C5orf51	0.128459	6.05207	2.6819	0.0161125	0.108421	-4.11615	1703	1715	1685	1812
C5orf54	-0.362786	0.8471	-1.31175	0.207668	0.481829	-4.83698	57	52	38	41
C5orf55	0.132666	1.93441	0.674726	0.509249	0.746262	-5.66833	103	93	94	107
C5orf56	-0.481606	0.0428615	-1.37308	0.188209	0.457622	-4.64603	29	36	20	23
C5orf63	-0.12927	2.27867	-0.620406	0.543515	0.770399	-5.80939	110	169	109	124
C5orf66	-0.177749	1.87537	-0.853848	0.405487	0.669401	-5.52018	95	115	88	85
C6orf1	0.0237949	3.94638	0.24646	0.808384	0.920573	-6.53514	407	416	372	411
C6orf106	-0.0950149	7.26748	-2.7373	0.0143699	0.100736	-4.31477	4295	4283	3606	3911
C6orf120	-0.132023	5.97561	-2.65053	0.0171872	0.112817	-4.15396	1812	1736	1470	1560
C6orf136	-0.0569268	4.95139	-0.788394	0.441712	0.697692	-6.59038	841	860	698	834
C6orf163	0.0229795	1.97638	0.116841	0.908405	0.965933	-5.89493	97	113	95	104
C6orf164	0.154692	0.0660384	0.441044	0.664939	0.843661	-5.31844	23	30	24	31
C6orf165	0.0763156	0.407107	0.240598	0.812848	0.922662	-5.45028	38	31	30	38
C6orf183	0.386362	0.104899	1.12016	0.27878	0.557604	-4.89644	22	28	31	30
C6orf201	-0.914074	-0.175101	-2.41336	0.0278324	0.153596	-3.36602	36	29	13	19
C6orf203	0.186181	4.41488	2.13179	0.0484715	0.212164	-4.63349	509	569	557	589
C6orf211	-0.101523	5.48235	-1.65165	0.117619	0.35297	-5.75435	1217	1276	1081	1094
C6orf223	-0.610056	0.600418	-2.04795	0.0569234	0.233153	-3.87999	51	49	28	33
C6orf226	0.0918163	0.668278	0.305688	0.763688	0.894634	-5.49516	48	35	37	45
C6orf47	-0.057866	4.20078	-0.573033	0.574395	0.787546	-6.48383	557	457	446	462
C6orf48	0.116713	6.24917	2.19276	0.0430651	0.199497	-5.09383	2060	1876	1992	2001
C6orf57	0.140865	2.43766	0.804367	0.43269	0.690821	-5.73487	155	124	128	159
C6orf62	0.0213877	8.21374	0.725619	0.478298	0.725749	-7.48571	7893	7984	7210	7873
C6orf89	0.0163032	7.83534	0.498032	0.625073	0.82286	-7.56079	6164	6068	5672	5905
C7orf13	-0.313019	2.7241	-2.05327	0.0563501	0.231651	-4.25314	209	187	149	149
C7orf26	0.129312	5.33682	2.11564	0.0500042	0.216383	-4.95578	1022	1059	1034	1096
C7orf31	-0.344024	0.642048	-1.13826	0.271365	0.549502	-4.97228	46	48	28	42
C7orf34	-0.357461	1.24805	-1.40551	0.178529	0.444889	-4.81154	64	81	48	57
C7orf43	-0.112474	4.01861	-1.16961	0.258874	0.537355	-5.90669	470	438	365	421
C7orf49	-0.0198435	4.99159	-0.274305	0.787275	0.908113	-6.88517	870	853	808	785
C7orf50	-0.0616058	5.80965	-1.01085	0.326769	0.600125	-6.66392	1629	1459	1385	1383
C7orf55-LUC7L2	-0.117709	6.03403	-2.23863	0.0393708	0.188425	-4.94796	1819	1855	1585	1586
C7orf60	0.211176	3.26728	1.6337	0.121368	0.359442	-5.06326	244	238	230	294
C7orf73	-0.0677079	5.18839	-1.07927	0.296083	0.573805	-6.3968	1010	1000	866	929
C8G	-0.983227	-0.0674038	-2.38761	0.029306	0.158398	-3.39607	39	33	10	27
C8orf33	0.0537086	6.60456	1.23677	0.233587	0.511371	-6.64667	2530	2618	2347	2655
C8orf37	0.209986	3.30688	1.73214	0.102009	0.3255	-4.93113	245	250	252	284
C8orf44	-0.24533	2.42347	-1.47338	0.15958	0.421348	-5.02625	158	156	113	135
C8orf58	-0.447518	1.04368	-1.64306	0.1194	0.355736	-4.48121	56	74	42	46
C8orf59	0.106787	5.70417	1.90179	0.0749107	0.274118	-5.43198	1381	1327	1263	1468
C8orf76	0.253178	2.09267	1.34854	0.195811	0.46741	-5.08921	99	111	109	125
C8orf82	-0.0884797	5.20353	-1.41786	0.174949	0.440509	-5.99615	1031	1015	867	934
C8orf88	-0.0256879	5.504	-0.413629	0.684503	0.853309	-7.00088	1292	1175	1119	1148
C9orf114	0.135844	6.10445	2.86244	0.0110769	0.0843164	-3.77222	1804	1732	1748	1888
C9orf116	0.00392341	1.67874	0.0177203	0.986076	0.994729	-5.80925	92	80	69	93
C9orf117	0.245434	1.74838	1.03401	0.316137	0.591269	-5.32854	70	97	103	82
C9orf142	-0.0289414	4.71382	-0.384001	0.70591	0.865366	-6.7537	735	692	642	667
C9orf156	-0.0890032	4.28434	-1.03845	0.314129	0.590091	-6.13667	550	532	453	499
C9orf16	-0.0891971	3.98841	-0.836397	0.414951	0.677375	-6.22384	469	415	342	437
C9orf172	-0.193833	3.01828	-1.42761	0.172166	0.437905	-5.26483	243	223	187	194
C9orf3	0.23262	2.55319	1.47072	0.160291	0.422333	-5.07003	151	140	151	169
C9orf37	0.242972	4.07126	2.61264	0.018577	0.118945	-3.64582	417	415	430	492
C9orf40	-0.0344853	5.47688	-0.56348	0.580731	0.791408	-6.91616	1271	1158	1079	1139
C9orf41	-0.0982178	6.52218	-2.27713	0.0364991	0.17854	-5.01611	2633	2491	2151	2328
C9orf43	0.211963	0.235408	0.647904	0.526013	0.758108	-5.25834	30	28	29	34
C9orf64	0.107905	5.26443	1.66011	0.115886	0.350587	-5.67411	1035	959	994	1017
C9orf66	-0.201678	-0.104298	-0.521222	0.609178	0.811736	-5.25202	23	30	27	17
C9orf69	-0.147777	6.08407	-3.01409	0.00805845	0.0686655	-3.45736	1912	1936	1520	1732
C9orf72	-0.110731	3.16441	-0.730304	0.475507	0.723833	-6.02594	217	290	197	238
C9orf78	0.0211944	6.62436	0.502697	0.621859	0.820706	-7.29235	2593	2683	2418	2592
C9orf85	-0.160167	2.70889	-1.05936	0.304789	0.582057	-5.5918	188	183	157	154
C9orf89	-0.210963	2.52479	-1.30991	0.208276	0.482653	-5.25982	161	172	125	144
C9orf9	-0.249928	1.30667	-1.00945	0.327418	0.600604	-5.23505	72	72	62	52
C9orf91	0.0303695	4.48268	0.351125	0.729964	0.87638	-6.68701	561	632	552	586
CA1	0.0234424	11.9295	1.32012	0.204921	0.478213	-7.43974	103482	104975	95085	103216
CA11	-0.783771	0.842633	-2.67866	0.0162204	0.108758	-2.93809	73	54	35	33
CA13	-0.775572	0.137518	-2.14796	0.0469801	0.208455	-3.71994	32	46	17	25
CA2	0.149546	9.17193	5.99527	1.68298e-05	0.000751588	2.15398	14731	14776	14640	15997
CA3	0.328836	0.244467	1.00821	0.327997	0.60122	-5.01456	29	27	31	35
CA5B	-0.0519922	2.02998	-0.229735	0.821138	0.926093	-5.89257	95	130	117	87
CA5BP1	0.208666	4.20102	2.18692	0.0435579	0.200508	-4.46868	476	444	511	486
CA8	0.0492371	7.30873	1.38545	0.184467	0.451975	-6.62734	4155	4243	3864	4270
CAAP1	0.023636	5.49981	0.382709	0.70685	0.865722	-7.01262	1248	1172	1056	1248
CAB39	-0.0993027	7.992	-3.29676	0.0044279	0.046002	-3.30719	7163	7033	5951	6452
CAB39L	0.0973784	1.26046	0.374337	0.712949	0.867738	-5.62387	75	51	60	64
CABIN1	-0.217039	7.39707	-6.38879	7.97828e-06	0.000416178	3.21493	4943	4848	3753	4132
CABLES1	-0.0311207	4.36124	-0.349531	0.731138	0.876861	-6.64529	529	591	496	528
CABLES2	-0.335258	3.16974	-2.57851	0.0199205	0.124893	-3.44935	286	258	197	206
CABP7	-0.598542	0.132477	-1.73524	0.101445	0.324937	-4.25077	40	32	23	21
CACNA1C	0.123294	1.59525	0.563311	0.580843	0.791408	-5.63359	80	75	77	81
CACNA1C-AS1	0.355458	1.24848	1.30754	0.209061	0.483062	-4.92445	48	66	54	83
CACNA1H	-0.0172303	5.34876	-0.288936	0.77625	0.901466	-6.99693	1120	1088	976	1066
CACNA2D4	-0.279674	1.76302	-1.29524	0.213171	0.487307	-5.05956	99	102	65	91
CACNB1	-0.143197	1.51398	-0.624572	0.540843	0.768169	-5.57556	81	80	59	78
CACNB2	-0.199148	1.69133	-0.920309	0.370749	0.638821	-5.413	101	85	74	77
CACNB3	0.609925	-0.0576695	1.63165	0.121803	0.360215	-4.35672	26	16	31	28
CACTIN	0.0886483	6.13449	1.90289	0.074758	0.274105	-5.55928	1840	1830	1739	1914
CACTIN-AS1	-0.370172	0.109893	-1.08212	0.294851	0.572681	-4.92892	33	32	25	22
CACUL1	-0.0389239	6.26714	-0.870897	0.396378	0.662855	-6.93282	2113	2092	1836	1995
CACYBP	0.0589905	7.52381	1.78984	0.091957	0.307458	-6.08309	4877	4836	4564	4906
CAD	0.0881558	8.67222	2.76956	0.0134404	0.0960003	-4.50669	10366	10958	10249	10955
CALCOCO1	-0.226713	4.28381	-2.44918	0.0258981	0.147904	-4.01677	601	536	415	494
CALCOCO2	0.15745	5.44095	2.42451	0.0272157	0.151747	-4.4276	1060	1159	1073	1242
CALHM2	0.0745053	2.01712	0.379466	0.70921	0.866448	-5.84419	108	104	90	120
CALM1	0.0397982	6.96125	1.02822	0.318772	0.593069	-6.96857	3260	3361	3073	3296
CALM2	-0.045752	8.65635	-1.57065	0.135353	0.383836	-6.61883	11221	10862	9799	10219
CALM2P2	0.400448	0.319453	1.18424	0.253194	0.531249	-4.87319	32	26	28	45
CALM3	-0.0299369	9.16497	-1.13488	0.272739	0.551204	-7.26056	15743	15501	13992	14644
CALML4	-0.131939	3.13769	-1.01733	0.323767	0.597339	-5.77185	251	244	211	212
CALR	-0.0513417	9.60541	-2.11779	0.0497978	0.216017	-5.88205	21781	20946	18572	20013
CALU	0.137211	6.48386	3.26368	0.00475064	0.0481463	-3.05353	2309	2288	2277	2455
CAMK1D	-0.138795	2.76667	-0.754438	0.461281	0.712225	-5.87639	203	183	124	212
CAMK2G	0.182181	4.56569	2.28959	0.0356123	0.176216	-4.40197	605	591	632	639
CAMKK1	-0.632805	3.01528	-4.14325	0.000728258	0.0126985	-0.338157	246	297	171	156
CAMKK2	-0.170152	5.35313	-2.60012	0.0190597	0.121409	-4.06449	1139	1199	889	1057
CAMKMT	-0.200149	3.25347	-1.61802	0.124724	0.36471	-5.0794	279	271	210	238
CAMLG	0.0755735	4.53197	0.848227	0.40852	0.671437	-6.39988	639	574	616	582
CAMSAP1	-0.0337943	5.82153	-0.603618	0.554354	0.775734	-7.0005	1502	1583	1307	1514
CAMTA1	0.0578955	3.42787	0.370187	0.71598	0.868973	-6.31683	350	230	254	300
CAMTA2	-0.0120741	5.32961	-0.184669	0.855752	0.941682	-7.01669	1039	1138	973	1045
CAND1	0.105627	7.81765	3.25307	0.00485908	0.0487968	-3.36751	5783	5935	5674	6125
CAND2	-0.226868	0.0415766	-0.655282	0.521371	0.754322	-5.21524	31	28	24	23
CANT1	-0.0531926	5.98116	-1.06922	0.300452	0.577741	-6.65635	1777	1690	1491	1636
CANX	0.0299394	9.63054	1.27034	0.221689	0.49777	-7.17078	21432	20834	19464	20919
CAP1	-0.0555667	7.27984	-1.49843	0.153021	0.411783	-6.46804	4399	4138	3718	3967
CAPG	-0.738166	1.58161	-3.28198	0.00456933	0.0467713	-1.90613	105	102	60	56
CAPN1	-0.269122	8.00746	-8.17347	3.51516e-07	3.82814e-05	6.34055	7648	7566	5827	5988
CAPN10	-0.0806529	4.3925	-0.97036	0.34596	0.616294	-6.2407	598	565	494	535
CAPN10-AS1	0.0655178	1.5432	0.236203	0.816199	0.923711	-5.74275	58	101	60	92
CAPN15	-0.0446163	7.56193	-1.29721	0.21251	0.486515	-6.79093	5176	5165	4400	4990
CAPN2	-0.025959	5.25795	-0.408879	0.687917	0.855031	-6.92397	1035	1043	947	964
CAPN5	-0.971817	4.00898	-9.56429	4.08066e-08	6.75485e-06	8.92008	627	586	293	286
CAPN7	0.115086	5.84111	2.08334	0.0532041	0.224823	-5.16702	1429	1540	1447	1560
CAPNS1	-0.057436	7.9695	-1.81371	0.0880601	0.301009	-6.12876	6883	6889	6049	6336
CAPRIN1	0.0370297	9.13217	1.49128	0.154869	0.414196	-6.80768	14969	14877	13719	14944
CAPRIN2	-0.109325	6.57176	-2.64856	0.0172569	0.112974	-4.32498	2685	2638	2194	2425
CAPS	-0.125744	1.01273	-0.456002	0.654368	0.838183	-5.52723	63	50	53	44
CAPZA1	0.0275405	8.1041	0.909962	0.376021	0.644038	-7.31284	7475	7209	6756	7250
CAPZA2	-0.0665504	6.88341	-1.74639	0.0994413	0.321682	-6.01205	3249	3260	2772	3046
CAPZB	0.0022636	7.39768	0.0543885	0.957283	0.982018	-7.60454	4439	4636	4248	4258
CARD6	-0.122101	3.68805	-0.983012	0.33988	0.611008	-5.98997	378	348	261	368
CARD8	-0.0017126	5.49085	-0.029396	0.976903	0.989964	-7.08601	1241	1182	1106	1159
CARD9	0.311805	1.05625	1.15154	0.266021	0.544902	-5.04525	59	42	54	62
CARF	0.0144578	1.84905	0.0652214	0.948786	0.98021	-5.85938	86	108	75	109
CARHSP1	-0.289439	5.45243	-4.66929	0.000240855	0.0056207	0.205297	1275	1331	993	1003
CARKD	-0.0158068	5.07568	-0.238575	0.81439	0.922983	-6.92246	918	907	832	858
CARM1	0.0115319	7.7309	0.352593	0.728884	0.876086	-7.60583	5787	5615	5081	5680
CARNS1	-0.970553	0.370532	-2.50936	0.0229312	0.137134	-3.20678	38	62	15	34
CARS	-0.0528976	6.53255	-1.249	0.229195	0.505831	-6.61192	2590	2489	2218	2364
CARS2	0.166886	6.27238	2.95545	0.00911617	0.0746059	-3.63129	2086	1853	1894	2244
CASC3	0.0160888	7.30021	0.421571	0.678811	0.850459	-7.49231	4119	4326	3879	4110
CASC4	0.0947771	5.33196	1.53065	0.144914	0.400167	-5.88341	1089	1011	1013	1085
CASC5	0.0178342	7.13592	0.484509	0.634431	0.826802	-7.42711	3719	3812	3411	3725
CASC7	-0.0894661	7.4194	-2.59313	0.0193341	0.122403	-4.62921	4727	4787	3969	4402
CASD1	-0.0476076	3.38389	-0.404053	0.691393	0.857251	-6.28763	283	288	244	273
CASK	-0.0531193	2.88222	-0.37375	0.713377	0.867738	-6.12898	194	210	174	190
CASKIN2	-0.894147	0.960699	-3.30607	0.00434102	0.0452509	-1.90287	73	69	34	37
CASP10	-0.265534	4.6307	-3.4613	0.00311807	0.0362122	-2.10412	726	737	536	603
CASP2	0.0709885	6.30723	1.42081	0.174102	0.439593	-6.33103	1999	2167	1952	2140
CASP3	0.0206966	6.86362	0.52028	0.60982	0.812055	-7.34455	3160	3071	2772	3147
CASP4	-0.197794	0.96473	-0.709533	0.487958	0.732705	-5.38169	48	65	42	49
CASP6	-0.0850509	5.13981	-1.30758	0.209047	0.483062	-6.11766	1000	955	844	881
CASP7	-0.0205764	0.55158	-0.0635985	0.950059	0.980708	-5.50719	42	37	27	48
CASP8	0.0312083	5.11472	0.475884	0.640434	0.830588	-6.84719	904	942	851	914
CASP8AP2	-0.0337357	5.82875	-0.636806	0.533039	0.762389	-6.98155	1562	1537	1318	1517
CASP9	0.0179627	2.85329	0.115043	0.909808	0.966672	-6.18382	180	206	196	171
CASS4	-0.89787	1.00237	-3.25863	0.00480196	0.048508	-1.97801	66	81	37	36
CAST	-0.0620342	8.70718	-2.31147	0.0341035	0.172042	-5.39515	11614	11395	9817	10816
CAT	-0.0416174	8.0792	-1.36846	0.189622	0.459617	-6.79704	7458	7322	6533	6905
CATSPER2	-0.0459531	2.24985	-0.254156	0.802534	0.917023	-5.95825	120	140	117	118
CATSPERG	0.125196	0.257229	0.34264	0.736221	0.879889	-5.39132	31	30	21	45
CAV2	0.00576377	2.29528	0.0299661	0.976456	0.989964	-6.00524	121	142	138	111
CBFA2T2	0.142967	4.62007	1.60335	0.127938	0.370073	-5.54861	695	571	615	688
CBFA2T3	0.0569434	6.50374	1.35897	0.19255	0.463251	-6.46737	2398	2395	2226	2441
CBFB	0.0388162	5.59801	0.689996	0.499844	0.740384	-6.87347	1274	1299	1210	1264
CBL	-0.00716597	4.37552	-0.0862688	0.932297	0.975492	-6.71011	556	564	504	539
CBLB	-0.144977	3.82909	-1.41032	0.177127	0.443523	-5.55097	405	400	311	371
CBLL1	0.0939819	6.26006	2.09934	0.0515966	0.220657	-5.26206	2007	1989	1913	2079
CBLN3	-0.0658624	-0.0929761	-0.174064	0.863946	0.945262	-5.35437	22	29	27	19
CBR1	0.0821856	4.46517	0.976279	0.343106	0.613817	-6.26069	564	591	573	572
CBR4	-0.037234	4.68996	-0.498285	0.624899	0.82286	-6.69326	721	687	617	667
CBS	0.114409	8.71727	4.1074	0.000785845	0.0134199	-1.7051	10869	10928	10426	11669
CBWD1	-0.0467127	6.25887	-0.822053	0.422836	0.683085	-6.97223	2171	2019	1942	1859
CBWD2	0.0121342	5.47543	0.160329	0.87458	0.951218	-7.06809	1130	1256	1171	1084
CBWD3	0.159165	2.4693	0.873218	0.395149	0.661422	-5.68935	124	159	157	138
CBWD5	-0.124116	3.78947	-0.899868	0.381212	0.648677	-6.10118	452	335	285	388
CBWD6	0.0488113	3.04089	0.309724	0.760671	0.893446	-6.20511	185	256	200	221
CBWD7	-0.184655	0.0880661	-0.481116	0.636789	0.828552	-5.30674	33	27	34	18
CBX1	0.0897923	5.86805	1.57012	0.135475	0.384089	-5.99421	1564	1489	1383	1662
CBX2	-0.0916039	5.82913	-1.76854	0.0955625	0.314417	-5.68302	1596	1566	1307	1471
CBX3	-0.0110857	8.21852	-0.366587	0.718613	0.869889	-7.69005	8005	8107	7075	7895
CBX4	-0.0966065	6.2666	-2.05151	0.0565396	0.232046	-5.34599	2097	2193	1790	1964
CBX5	-0.175602	7.65323	-5.0712	0.000105185	0.00298144	0.520377	5651	5877	4577	4974
CBX6	-0.0245583	6.62644	-0.551828	0.588506	0.797457	-7.26569	2746	2620	2448	2490
CBX7	-0.0107506	2.63893	-0.0681143	0.946518	0.979777	-6.11658	159	177	158	154
CBX8	0.0806381	4.56436	1.02881	0.318501	0.593065	-6.24264	608	631	585	641
CBY1	0.182237	3.22563	1.43476	0.170148	0.435365	-5.32315	249	224	234	268
CC2D1A	-0.0512806	6.39779	-1.10174	0.28648	0.564811	-6.74314	2404	2222	2017	2159
CC2D1B	0.0503251	4.61957	0.658484	0.519364	0.753172	-6.57449	648	653	595	666
CCAR1	0.0302756	7.79853	0.95211	0.354862	0.624014	-7.21712	6014	5857	5382	5967
CCAR2	-0.0118132	7.85188	-0.381132	0.707997	0.865994	-7.61756	6295	6203	5528	6076
CCBL1	-0.449688	2.63501	-2.91613	0.00990015	0.078537	-2.69072	196	194	130	137
CCBL2	-0.0621351	4.93136	-0.794442	0.438283	0.69454	-6.57893	903	779	744	761
CCDC101	0.139385	4.02915	1.33291	0.200782	0.472731	-5.7176	432	404	453	412
CCDC102B	0.293897	-0.0234539	0.835563	0.415407	0.67752	-5.09506	22	25	25	29
CCDC104	0.250202	3.8262	2.46584	0.0250422	0.144268	-3.84877	341	359	374	405
CCDC106	-0.228699	3.7209	-1.96476	0.0666145	0.257398	-4.6931	396	374	264	354
CCDC107	0.0771362	1.381	0.278216	0.784323	0.906392	-5.68639	57	80	82	55
CCDC109B	-0.0460645	4.77744	-0.615672	0.54656	0.77225	-6.65574	782	719	664	696
CCDC112	-0.0435013	5.2531	-0.677069	0.5078	0.745628	-6.77185	1081	1006	887	1008
CCDC113	-0.182015	2.79146	-1.21845	0.240288	0.518993	-5.44768	194	203	146	182
CCDC115	0.000503484	4.07346	0.00541801	0.995742	0.998558	-6.61027	444	462	410	438
CCDC117	0.0635861	6.01802	1.28524	0.216561	0.491428	-6.42081	1685	1729	1623	1716
CCDC12	-0.0625285	5.09575	-0.823585	0.421989	0.682339	-6.6091	1006	878	849	838
CCDC121	0.273296	0.363175	0.831651	0.417549	0.679051	-5.17001	29	33	40	31
CCDC124	-0.0433106	7.43006	-1.1635	0.261275	0.53973	-6.92414	4841	4590	4210	4353
CCDC125	0.0656927	4.61733	0.821439	0.423176	0.683457	-6.45156	643	650	577	691
CCDC126	0.265304	2.40155	1.46348	0.162237	0.424806	-5.03523	121	139	123	171
CCDC127	-0.0662603	3.87861	-0.672068	0.510897	0.747353	-6.3112	404	406	345	379
CCDC130	0.144722	4.64269	1.80347	0.0897125	0.303844	-5.25326	616	665	613	712
CCDC132	-0.0384247	5.19315	-0.596003	0.559309	0.778125	-6.80552	982	1014	892	927
CCDC134	-0.0530627	2.7603	-0.317631	0.754772	0.889886	-6.10798	214	160	173	162
CCDC136	0.190678	1.45772	0.795807	0.437511	0.693862	-5.44867	80	59	72	75
CCDC137	0.0323204	6.06458	0.662814	0.516657	0.751576	-7.03632	1757	1809	1620	1793
CCDC138	0.177046	4.89208	2.48045	0.0243139	0.141611	-4.15304	780	724	776	815
CCDC14	-0.001561	7.03919	-0.0388685	0.969464	0.98744	-7.52769	3473	3620	3111	3522
CCDC142	0.163245	2.49969	0.896876	0.38276	0.649401	-5.67877	123	167	155	146
CCDC144CP	-0.192551	-0.159649	-0.497028	0.625765	0.823108	-5.2514	28	23	15	28
CCDC15	0.0404672	4.42955	0.481344	0.636631	0.828552	-6.61251	565	578	550	551
CCDC150	0.0343329	3.54618	0.306784	0.762868	0.894634	-6.3798	303	318	289	306
CCDC152	0.0261648	2.54974	0.159103	0.875531	0.951476	-6.07693	172	141	144	153
CCDC154	0.613967	-0.0564343	1.72555	0.103216	0.327813	-4.24826	19	22	28	31
CCDC157	-0.20342	1.36468	-0.775429	0.449123	0.703312	-5.43748	60	91	61	59
CCDC159	-0.0473128	1.43968	-0.19149	0.850492	0.938983	-5.72189	86	63	71	63
CCDC163P	-0.288459	1.00962	-1.09421	0.289673	0.567434	-5.0887	58	61	42	49
CCDC167	-0.128143	4.33272	-1.51987	0.147584	0.404076	-5.56983	577	557	467	504
CCDC169	-0.0610372	3.1426	-0.475928	0.640403	0.830588	-6.17279	248	237	210	225
CCDC17	-0.306666	0.97275	-1.13417	0.273027	0.551272	-5.04282	64	53	44	44
CCDC171	0.157618	0.564349	0.485491	0.633749	0.826257	-5.40796	32	43	46	33
CCDC174	0.128486	4.35485	1.43823	0.169175	0.434216	-5.6897	562	494	503	576
CCDC18	-0.0681635	4.90245	-0.90159	0.380323	0.647671	-6.47785	785	867	688	785
CCDC183	0.261799	0.284999	0.776277	0.448635	0.702814	-5.19171	27	32	38	29
CCDC183-AS1	-0.18966	1.21504	-0.659309	0.518848	0.753167	-5.47472	52	85	45	65
CCDC23	0.107475	3.38795	0.879938	0.391603	0.657164	-5.98371	289	254	272	275
CCDC24	-0.174056	1.28675	-0.643692	0.528674	0.759838	-5.50275	59	82	46	71
CCDC25	0.00488157	6.81499	0.117462	0.90792	0.965933	-7.46711	3077	2976	2809	2876
CCDC27	-0.223594	0.637986	-0.691968	0.498637	0.739614	-5.31729	57	35	39	33
CCDC28A	0.0776704	4.5502	0.96253	0.34976	0.620147	-6.30295	600	629	563	651
CCDC28B	0.01531	3.80143	0.138366	0.891636	0.958993	-6.50674	402	347	319	389
CCDC34	0.0981484	4.95228	1.44326	0.167774	0.43241	-5.8824	802	809	780	834
CCDC39	-0.125128	2.83246	-0.870679	0.396494	0.662959	-5.80597	195	205	163	180
CCDC40	0.635848	-0.173668	1.50931	0.150241	0.408538	-4.48041	12	29	24	31
CCDC41	0.105222	5.19828	1.58	0.133197	0.379919	-5.77087	948	960	879	1044
CCDC43	0.07771	5.22758	1.25672	0.226457	0.503265	-6.20897	990	974	932	1008
CCDC47	0.0636284	7.62343	1.84227	0.0835885	0.292079	-6.01845	5353	5042	4895	5269
CCDC50	-0.115249	5.81101	-2.13167	0.0484825	0.212164	-5.07235	1630	1518	1322	1397
CCDC51	0.164424	4.63255	2.16188	0.0457301	0.205256	-4.65145	636	625	645	678
CCDC53	-0.135086	2.31789	-0.711143	0.486986	0.73235	-5.76344	165	119	117	122
CCDC57	-0.254992	4.34353	-2.90136	0.0102112	0.0798248	-3.16151	572	623	451	485
CCDC58	0.195607	4.84767	2.76434	0.0135868	0.0968868	-3.59082	742	707	744	809
CCDC59	-0.0376374	5.94318	-0.685979	0.502308	0.741253	-6.98322	1748	1614	1418	1648
CCDC6	0.107357	7.26734	2.99328	0.00841936	0.0709134	-3.79905	4050	3945	3932	4128
CCDC61	-0.077355	4.77232	-1.06199	0.303628	0.581092	-6.27818	775	737	638	703
CCDC65	-0.612269	-0.053617	-1.42889	0.171805	0.437529	-4.57601	42	24	12	30
CCDC66	0.0240631	5.33168	0.400673	0.693832	0.857941	-6.95136	1094	1057	980	1067
CCDC68	-0.0145796	2.40045	-0.0878631	0.931049	0.97503	-6.03647	145	140	125	139
CCDC69	-0.325121	6.13858	-6.40592	7.72687e-06	0.000409954	3.52238	2161	2084	1584	1589
CCDC7	0.0661634	0.161315	0.197015	0.846236	0.936973	-5.40429	28	30	25	32
CCDC71	-0.0664002	4.88641	-0.95541	0.35324	0.623149	-6.42268	816	814	691	766
CCDC71L	-0.105771	1.62339	-0.476957	0.639686	0.830287	-5.68347	94	78	69	80
CCDC77	0.0558562	3.68662	0.478839	0.638374	0.829279	-6.35921	339	339	351	312
CCDC78	0.543517	3.57246	4.69964	0.000226117	0.00537785	0.697643	248	283	352	371
CCDC82	0.0755222	4.88826	1.08107	0.295306	0.573117	-6.29783	782	772	720	813
CCDC84	-0.0070023	3.36445	-0.0588487	0.953784	0.981534	-6.36307	275	280	254	263
CCDC85B	0.0312919	5.48151	0.538124	0.597719	0.803908	-6.93241	1171	1210	1083	1194
CCDC85C	-0.121293	3.64464	-1.13073	0.274434	0.553	-5.82425	353	349	285	319
CCDC86	-0.00535497	6.50949	-0.104919	0.917712	0.969192	-7.3876	2563	2354	2302	2283
CCDC88A	0.0532873	7.31356	1.54323	0.141848	0.395054	-6.41225	4228	4184	3949	4220
CCDC88B	-0.641303	1.71675	-2.90467	0.0101405	0.0796419	-2.58453	117	104	56	77
CCDC88C	-0.0937559	6.61076	-2.08552	0.0529821	0.224336	-5.38181	2722	2713	2379	2390
CCDC9	-0.130026	5.10089	-1.87279	0.0790329	0.281709	-5.28956	926	1009	797	856
CCDC90B	0.0501664	4.37433	0.58145	0.568843	0.783165	-6.53891	532	565	527	536
CCDC91	-0.171004	4.70964	-2.00356	0.0619229	0.245922	-4.94698	803	697	564	682
CCDC92	-0.151653	1.68455	-0.704951	0.490731	0.734057	-5.57363	97	85	71	82
CCDC93	0.182768	5.17714	2.78543	0.0130046	0.0937584	-3.64998	886	944	925	1018
CCDC94	-0.0626596	5.08746	-0.89075	0.385943	0.65249	-6.54847	992	882	804	873
CCDC97	0.0259739	5.8375	0.490682	0.630151	0.82462	-7.06982	1539	1515	1353	1559
CCHCR1	-0.129116	5.13597	-1.71968	0.1043	0.329941	-5.54191	1057	929	771	928
CCM2	-0.364604	4.78409	-4.50107	0.000342289	0.00723937	0.0325506	901	787	569	656
CCNA2	0.0291755	8.13479	0.969375	0.346436	0.616661	-7.26232	7628	7363	6910	7405
CCNB1	0.0550546	8.22819	1.91041	0.0737236	0.272	-6.01808	7983	7867	7399	8013
CCNB1IP1	-0.0595809	4.64293	-0.653444	0.522526	0.755375	-6.58518	631	746	619	614
CCNB2	0.0220519	7.00828	0.580025	0.56978	0.783822	-7.34519	3414	3470	3090	3454
CCNB3	-0.210062	0.553653	-0.691262	0.499069	0.740065	-5.29935	44	40	36	32
CCNC	0.0373385	6.90501	0.982338	0.340202	0.61132	-7.00106	3212	3160	2967	3153
CCND1	0.190543	7.11236	5.29908	6.62816e-05	0.00211539	1.0951	3505	3472	3595	3857
CCND2	-0.0019764	7.5087	-0.0572719	0.95502	0.9817	-7.62665	5035	4785	4417	4759
CCND3	-0.524996	8.00953	-15.4523	3.35253e-11	3.20166e-08	15.9201	8467	8183	5355	5473
CCNDBP1	-0.159257	5.52942	-2.792	0.0128284	0.0930287	-3.74166	1346	1283	1062	1141
CCNE1	-0.15669	6.15296	-3.38455	0.00367272	0.0406022	-2.70861	2032	2015	1625	1773
CCNE2	0.00494423	5.12437	0.0581416	0.954338	0.9817	-6.9667	946	925	947	821
CCNF	0.041276	6.83783	0.989043	0.337008	0.609108	-6.97778	2964	3114	2767	3086
CCNG1	-0.0994903	6.60094	-2.3873	0.0293243	0.158398	-4.83337	2734	2677	2307	2420
CCNG2	-0.456375	2.15345	-2.26264	0.0375559	0.182203	-3.7662	161	121	100	91
CCNH	0.0739849	6.19848	1.5198	0.147602	0.404076	-6.164	1947	1911	1759	2045
CCNI	-0.0508643	7.60762	-1.44568	0.167102	0.431603	-6.60648	5265	5433	4551	5118
CCNJ	0.190781	4.92021	2.71051	0.0151887	0.104796	-3.71901	763	762	807	823
CCNK	0.0191941	6.74517	0.465891	0.647421	0.834614	-7.34263	2815	2927	2604	2841
CCNL1	-0.0468511	6.82317	-1.20581	0.244996	0.522496	-6.73954	3152	3048	2704	2913
CCNL2	0.0389893	6.95752	0.888125	0.387312	0.653484	-7.10212	3175	3435	3077	3273
CCNT1	-0.0093949	6.40713	-0.201747	0.842595	0.934837	-7.3432	2227	2362	2036	2229
CCNT2	-0.0457465	5.8436	-0.899029	0.381646	0.648809	-6.78122	1579	1563	1375	1474
CCNY	-0.0675543	6.12035	-1.44337	0.167743	0.43241	-6.24592	1941	1895	1646	1780
CCNYL1	0.0904662	3.38496	0.704988	0.490708	0.734057	-6.12008	263	283	236	310
CCP110	0.145222	6.20495	2.99169	0.0084476	0.0710516	-3.53869	1842	1937	1901	2009
CCPG1	0.0102547	3.11248	0.075692	0.94058	0.978255	-6.27534	252	213	206	231
CCR10	-0.216717	2.81869	-1.49434	0.154074	0.413217	-5.11578	198	211	158	171
CCR4	-0.556777	0.576496	-1.81232	0.0882818	0.301353	-4.19679	43	54	31	30
CCR7	-1.30946	0.573691	-4.18358	0.000668564	0.0119945	-0.599248	61	64	26	21
CCRL2	-0.0385419	2.47205	-0.235982	0.816368	0.923818	-6.03571	146	156	135	140
CCRN4L	0.22337	4.28552	2.48026	0.024323	0.141611	-3.9616	468	505	490	573
CCS	-0.0256933	4.69543	-0.339768	0.738343	0.881312	-6.76412	729	679	625	669
CCSAP	0.396482	3.60189	2.70833	0.0152573	0.105	-3.32437	234	346	348	353
CCSER2	-0.0256647	3.12473	-0.181219	0.858416	0.942969	-6.26541	224	251	188	250
CCT2	0.0300953	9.12668	1.20175	0.246525	0.524354	-7.17836	14950	14852	13741	14738
CCT3	0.0274211	9.4065	1.10753	0.284044	0.563178	-7.32699	17975	18242	16623	17922
CCT4	-0.0105637	8.76747	-0.379374	0.709277	0.866448	-7.77853	11989	11575	10644	11244
CCT5	0.038291	8.88858	1.14218	0.26978	0.548338	-7.2093	13027	12176	11991	12217
CCT6A	0.0546577	9.29884	2.19038	0.0432652	0.199902	-5.70841	16792	16502	15704	16655
CCT6B	0.100002	0.283364	0.284532	0.779564	0.903752	-5.4127	28	35	23	42
CCT6P1	0.0797852	3.4448	0.690567	0.499494	0.740356	-6.1507	285	285	263	301
CCT6P3	0.0521714	1.72135	0.223631	0.825806	0.928574	-5.7982	91	82	99	72
CCT7	0.0434896	9.06076	1.58534	0.131978	0.378058	-6.66274	14154	14181	13387	13939
CCT8	0.0593589	9.33765	2.43987	0.026388	0.149352	-5.25327	17255	16897	15869	17444
CCT8P1	-0.0187959	1.32692	-0.0691479	0.945708	0.979729	-5.7054	56	82	50	77
CCZ1	-0.0378018	3.42312	-0.320142	0.752903	0.888526	-6.33241	296	288	268	265
CCZ1B	0.264962	5.03553	3.19425	0.00550556	0.0532748	-2.7796	756	861	808	1011
CD151	-0.256689	6.1548	-5.37012	5.74673e-05	0.00193874	1.46955	2146	2051	1550	1738
CD164	-0.0644175	8.99075	-2.35393	0.0313445	0.164057	-5.3619	13827	14201	12110	12972
CD247	0.0836808	2.25007	0.452493	0.656841	0.83869	-5.88971	112	137	125	121
CD274	-0.276845	1.71684	-0.908156	0.376946	0.644401	-5.42945	146	64	78	72
CD2AP	-0.0978872	7.29626	-2.68225	0.0161008	0.108401	-4.4297	4376	4381	3761	3897
CD2BP2	0.116906	5.64231	2.12765	0.0488602	0.213516	-5.02916	1283	1301	1238	1385
CD320	0.114965	6.88073	3.03157	0.007767	0.0673054	-3.63485	3051	3049	2970	3213
CD36	0.0542572	8.7041	1.95225	0.068193	0.261221	-6.02916	11264	10792	10227	11207
CD37	-0.25803	3.93651	-2.66292	0.0167547	0.110916	-3.50687	450	451	340	365
CD3EAP	0.19816	4.36243	2.2503	0.0384791	0.185306	-4.40738	549	486	543	567
CD44	0.0236551	5.79152	0.450015	0.65859	0.839294	-7.07534	1515	1445	1338	1478
CD46	0.0558614	7.41453	1.61881	0.124554	0.364444	-6.32329	4463	4552	4215	4555
CD47	0.0222384	6.65846	0.533119	0.601101	0.806261	-7.28495	2691	2707	2515	2616
CD55	-0.0494665	5.399	-0.795169	0.437871	0.694274	-6.73008	1211	1103	1001	1090
CD58	-0.30385	4.74371	-4.11707	0.000769878	0.0132554	-0.761825	791	812	582	633
CD59	-0.0495278	7.27912	-1.34551	0.196767	0.468684	-6.67266	4351	4161	3762	3934
CD63	-0.0796164	6.68894	-1.89904	0.0752933	0.274701	-5.71848	2948	2768	2421	2640
CD70	-0.126386	0.846806	-0.427677	0.674449	0.84827	-5.49738	61	41	45	41
CD81	0.101437	6.50881	2.35131	0.0315083	0.164389	-4.87691	2331	2406	2269	2487
CD82	-0.0546711	7.39045	-1.52573	0.146129	0.402065	-6.45258	4605	4604	4075	4223
CD83	0.176368	3.66515	1.63268	0.121583	0.359822	-5.19263	333	309	334	345
CD97	-0.370911	6.18918	-7.62128	8.82763e-07	7.51176e-05	5.73257	2186	2284	1569	1665
CD99	-0.140767	6.67317	-3.51066	0.00280623	0.0336612	-2.58241	2885	2887	2357	2543
CD99L2	-0.212984	4.34688	-2.14708	0.04706	0.20866	-4.58263	537	648	454	498
CD99P1	-0.325781	1.14989	-1.13931	0.270941	0.549259	-5.0761	52	85	46	53
CDADC1	0.00565289	3.34689	0.0474127	0.962757	0.984484	-6.35768	271	275	249	264
CDAN1	0.0570425	6.10961	1.20024	0.247097	0.524932	-6.54974	1811	1835	1721	1829
CDC123	-0.0207726	6.97513	-0.526375	0.605673	0.809325	-7.3681	3446	3378	3104	3192
CDC14A	-0.0329623	3.73251	-0.304761	0.764381	0.89501	-6.44463	375	348	335	327
CDC14B	0.12854	2.58387	0.667546	0.513707	0.749855	-5.87936	124	191	159	156
CDC16	-0.0936321	7.1901	-2.48944	0.0238754	0.14052	-4.78163	3997	4132	3371	3760
CDC20	0.0021771	7.69145	0.0675324	0.946974	0.979777	-7.66151	5593	5536	4946	5489
CDC23	0.077057	6.10523	1.62267	0.123721	0.363121	-5.98854	1792	1818	1723	1841
CDC25A	0.129631	6.5932	3.15698	0.00595825	0.0563387	-3.30425	2479	2493	2454	2637
CDC25B	-0.290954	6.82532	-6.84033	3.47733e-06	0.000222333	4.18459	3448	3314	2393	2784
CDC25C	-0.0146623	3.5936	-0.134229	0.894854	0.96104	-6.43532	331	322	285	320
CDC26	0.145101	3.37719	1.10009	0.287175	0.56511	-5.76858	246	286	288	263
CDC27	-0.0945682	7.69828	-2.85906	0.0111554	0.0847114	-4.15564	5915	5650	4832	5305
CDC34	-0.212124	6.07921	-3.8944	0.00123662	0.0186093	-1.60828	2073	1852	1527	1640
CDC37	-0.0252482	8.56989	-0.854786	0.404982	0.669401	-7.44293	10607	10051	9185	9807
CDC37L1	0.115595	4.19766	1.18904	0.251355	0.530168	-5.94584	502	447	492	471
CDC40	-0.0896158	6.02911	-1.74154	0.100308	0.322874	-5.78523	1812	1814	1589	1602
CDC42	-0.053514	7.88329	-1.71044	0.10603	0.333292	-6.27486	6594	6366	5589	6099
CDC42BPA	0.00270654	7.07157	0.0743265	0.941649	0.978373	-7.53316	3672	3568	3250	3539
CDC42BPB	-0.189474	3.2553	-1.32837	0.202242	0.474279	-5.46533	302	250	192	262
CDC42BPG	-0.931992	3.31371	-7.36427	1.37362e-06	0.000105112	5.51403	384	355	179	183
CDC42EP2	0.994815	1.04528	3.75776	0.00165534	0.0230651	-1.13087	42	36	69	77
CDC42EP4	-0.978132	4.651	-11.2149	4.16282e-09	9.93873e-07	11.2022	1006	894	454	448
CDC42P6	0.530898	0.501417	1.67659	0.112576	0.345093	-4.36178	27	36	45	40
CDC42SE1	-0.146189	6.36024	-2.41833	0.0275557	0.152714	-4.70926	2523	2149	1827	2116
CDC42SE2	0.100334	5.91527	1.81832	0.0873236	0.299647	-5.63149	1652	1492	1486	1666
CDC45	0.0465797	6.02263	0.946282	0.357738	0.627039	-6.79262	1705	1740	1620	1710
CDC5L	-0.014433	7.05365	-0.394479	0.698309	0.860181	-7.4499	3649	3544	3200	3465
CDC6	0.0592105	6.19715	1.28723	0.215882	0.490427	-6.47106	1943	1928	1832	1943
CDC7	-0.069775	6.00352	-1.20106	0.246785	0.524569	-6.51654	1766	1770	1617	1542
CDC73	0.016176	6.17834	0.32533	0.749044	0.886838	-7.24322	1879	2002	1769	1902
CDCA2	0.0205198	6.61684	0.48654	0.633021	0.826257	-7.29865	2580	2670	2399	2584
CDCA3	-0.114373	5.62341	-1.92966	0.0711312	0.267045	-5.36001	1367	1398	1094	1299
CDCA4	0.042823	5.8678	0.849397	0.407887	0.670962	-6.83297	1552	1547	1430	1558
CDCA5	0.0677024	6.91129	1.79198	0.0916014	0.306779	-5.94789	3189	3144	3004	3208
CDCA7	0.0411975	6.99734	1.03421	0.316045	0.591269	-6.97082	3394	3394	3038	3505
CDCA7L	0.0748347	5.91775	1.50198	0.152109	0.410709	-6.10579	1582	1591	1493	1635
CDCA8	-0.0728163	6.86557	-1.91166	0.0735522	0.271952	-5.74232	3249	3194	2734	3000
CDH1	-0.30148	6.09008	-6.36325	8.36886e-06	0.000432914	3.45205	2042	2032	1475	1619
CDH24	-0.114933	3.74671	-1.04738	0.310115	0.586276	-5.94625	364	387	333	317
CDH4	-0.155622	0.526956	-0.514919	0.613479	0.814464	-5.38594	41	40	31	37
CDH6	0.205373	6.60567	4.8699	0.000158943	0.00407702	0.318685	2413	2472	2563	2708
CDHR1	-0.179428	2.00374	-0.862658	0.400763	0.666944	-5.55117	129	102	80	111
CDHR5	0.0258747	1.29179	0.103513	0.918811	0.969739	-5.69307	71	59	66	58
CDIP1	-0.0953407	6.12075	-2.04075	0.0577095	0.235137	-5.32256	1943	1931	1631	1763
CDIPT	-0.0584742	5.1796	-0.906217	0.377941	0.645234	-6.56439	1026	967	844	947
CDK1	-0.0114864	7.28546	-0.31679	0.755399	0.890118	-7.52973	4165	4275	3711	4127
CDK10	0.0509627	6.18108	1.09694	0.28851	0.5663	-6.6867	1902	1938	1789	1934
CDK11A	0.0631893	1.78186	0.295184	0.771557	0.899679	-5.79859	94	86	95	82
CDK11B	0.0607543	5.67089	0.812048	0.428393	0.687707	-6.80302	1490	1212	1215	1412
CDK12	0.0654891	7.53838	1.58024	0.133142	0.379919	-6.40437	4686	5113	4642	4944
CDK13	0.124596	6.13507	2.66795	0.0165822	0.110174	-4.16736	1817	1808	1790	1909
CDK15	-0.228825	0.957954	-0.812266	0.428271	0.687659	-5.3107	64	49	49	41
CDK16	0.030876	6.63478	0.754313	0.461354	0.712225	-7.13207	2643	2652	2458	2605
CDK17	-0.051834	4.45807	-0.615319	0.546787	0.77225	-6.54638	597	609	496	594
CDK19	-0.283771	4.28204	-3.28348	0.00455481	0.0467713	-2.37047	578	577	435	453
CDK2	-0.00317326	5.85664	-0.0570298	0.95521	0.9817	-7.20007	1505	1621	1421	1496
CDK20	0.0501677	3.27233	0.400673	0.693831	0.857941	-6.25116	255	255	251	244
CDK2AP1	0.191014	4.67822	2.49764	0.0234825	0.139025	-4.05279	639	652	640	740
CDK2AP2	-0.139729	4.5573	-1.78058	0.0935094	0.310822	-5.25937	675	655	553	577
CDK4	-0.093343	7.46784	-2.48382	0.0241484	0.141083	-4.84949	5053	4797	4264	4375
CDK5	0.0121164	2.76816	0.0719475	0.943514	0.979113	-6.15929	190	176	139	211
CDK5R1	0.124541	3.58754	1.05699	0.305834	0.582393	-5.88415	338	284	292	341
CDK5RAP1	0.0210887	6.11547	0.439628	0.665944	0.844073	-7.17881	1825	1883	1686	1835
CDK5RAP2	0.0852327	7.28204	2.36093	0.03091	0.163376	-5.04427	4133	4010	3801	4288
CDK5RAP3	0.120491	6.2924	2.65037	0.0171929	0.112817	-4.24623	2018	2030	2011	2108
CDK6	0.0855778	8.33949	2.99828	0.00833124	0.0702579	-3.98793	8560	8383	8010	8820
CDK7	-0.0593235	4.77341	-0.683328	0.503938	0.742599	-6.60934	803	701	698	654
CDK8	0.0176291	6.31405	0.376468	0.711394	0.866779	-7.26387	2167	2091	1993	2042
CDK9	0.0293995	5.51836	0.461568	0.650453	0.835817	-6.9839	1288	1157	1159	1175
CDKAL1	0.00414693	5.40199	0.0695809	0.945368	0.979729	-7.05559	1118	1156	1029	1105
CDKL1	0.0683384	3.13312	0.503126	0.621565	0.820416	-6.15684	244	218	201	253
CDKN1A	-0.0278127	0.365307	-0.0760982	0.940261	0.978255	-5.46348	38	31	44	23
CDKN1B	-0.0515535	5.36639	-0.812694	0.428032	0.687454	-6.70536	1090	1174	966	1077
CDKN1C	-1.5669	2.64321	-9.49329	4.53024e-08	7.40039e-06	7.94138	291	287	90	92
CDKN2A	-0.0337453	8.76438	-1.07602	0.297493	0.575292	-7.26129	11941	11755	10754	10909
CDKN2AIP	0.180007	6.4662	3.9685	0.00105596	0.0165947	-1.55691	2320	2158	2244	2503
CDKN2AIPNL	0.0222447	4.58088	0.273203	0.788107	0.908598	-6.74614	633	647	553	665
CDKN2B	-0.137444	2.06859	-0.681947	0.504789	0.742785	-5.70387	106	132	87	115
CDKN2B-AS1	0.222344	0.116586	0.591866	0.56201	0.779593	-5.26347	19	37	29	29
CDKN2C	0.048181	6.24476	1.05119	0.308411	0.584824	-6.75354	1987	2030	1875	2012
CDKN2D	-0.682437	1.52284	-2.67436	0.0163646	0.109347	-2.9706	109	88	43	74
CDKN3	0.0186177	5.03854	0.275547	0.786337	0.90779	-6.90043	858	901	800	867
CDPF1	-0.172101	3.55693	-1.50061	0.15246	0.411207	-5.34091	319	354	269	289
CDR2	0.135837	4.93186	1.71497	0.105179	0.331828	-5.48532	763	808	718	901
CDR2L	0.117367	0.408887	0.36542	0.719468	0.870256	-5.41766	38	30	37	32
CDRT15P1	-1.08195	-0.359076	-2.62749	0.01802	0.116399	-3.09394	28	32	17	10
CDS2	-0.0711053	4.1867	-0.71049	0.48738	0.73235	-6.38919	491	512	471	426
CDT1	0.0811957	7.45435	2.24478	0.0388982	0.186687	-5.29293	4579	4610	4244	4862
CDV3	0.0858597	8.38757	2.90387	0.0101576	0.0796571	-4.18868	8908	8605	8465	8927
CDYL	0.099626	6.59777	2.27783	0.0364484	0.178441	-5.03603	2612	2432	2397	2660
CEBPB	-0.0631083	4.33747	-0.740354	0.469551	0.719511	-6.4187	547	566	468	529
CEBPD	0.313948	2.38114	1.7832	0.0930683	0.309853	-4.58563	140	112	146	146
CEBPG	0.0214383	5.64753	0.396735	0.696677	0.859766	-7.05374	1351	1329	1216	1330
CEBPZ	0.0491134	7.05093	1.2544	0.227279	0.504405	-6.73671	3619	3405	3310	3489
CEBPZ-AS1	-0.0211601	4.79579	-0.294381	0.77216	0.899806	-6.81346	751	756	657	733
CECR5	0.0996998	4.88359	1.41174	0.176716	0.442948	-5.90187	793	743	741	799
CECR7	0.0669034	4.00396	0.698289	0.494778	0.736805	-6.33656	425	418	411	416
CELF1	0.133746	7.13985	3.74746	0.00169217	0.023342	-2.18979	3629	3624	3578	3870
CELF2	-0.0425593	7.70218	-1.28062	0.218139	0.493736	-6.83848	5765	5624	4867	5488
CELF2-AS1	0.189353	0.884281	0.634374	0.534586	0.763123	-5.40853	57	37	54	45
CELSR2	-0.394613	6.24684	-7.99475	4.71533e-07	4.6461e-05	6.36327	2292	2402	1560	1782
CELSR3	0.172321	3.8176	1.58986	0.130954	0.375907	-5.30369	332	385	355	399
CENPA	-0.0925044	5.09529	-1.32782	0.202422	0.474612	-6.07783	935	968	762	910
CENPB	0.0199388	6.52767	0.409917	0.687171	0.854918	-7.3101	2493	2447	2132	2564
CENPBD1	0.330177	1.76518	1.53293	0.144353	0.399085	-4.77352	83	79	103	89
CENPBD1P1	-0.0857345	5.02649	-1.14612	0.268191	0.546551	-6.27159	861	951	733	864
CENPC	-0.0870225	5.5451	-1.47175	0.160015	0.421871	-6.03143	1327	1267	1056	1231
CENPE	-0.033124	7.08676	-0.811684	0.428596	0.687914	-7.19758	3633	3773	3345	3428
CENPF	0.00542681	8.46312	0.17471	0.863446	0.945262	-7.78735	9286	9697	8497	9335
CENPH	-0.0646951	5.3007	-0.994216	0.334559	0.607222	-6.51987	1044	1128	946	996
CENPI	0.0602149	4.55508	0.695177	0.496676	0.738205	-6.52701	579	663	591	618
CENPJ	0.096433	5.83179	1.81009	0.0886409	0.302054	-5.61923	1461	1505	1457	1511
CENPK	0.189582	4.81402	2.52436	0.0222434	0.13438	-4.04507	749	671	729	785
CENPL	0.0934437	4.82981	1.09023	0.291371	0.569755	-6.26871	694	794	665	820
CENPM	-0.0914249	5.32642	-1.50694	0.150843	0.409336	-5.914	1134	1096	954	1005
CENPN	0.0940122	5.55925	1.64747	0.118482	0.354277	-5.78564	1206	1253	1167	1289
CENPO	-0.00840819	5.54697	-0.138932	0.891196	0.958956	-7.0943	1264	1259	1182	1168
CENPP	0.029714	4.63498	0.393554	0.698979	0.860298	-6.72324	666	658	606	659
CENPQ	0.138908	3.72756	1.23512	0.234186	0.5116	-5.73574	318	362	353	347
CENPT	0.0181641	5.83389	0.346615	0.733288	0.878426	-7.13161	1553	1499	1418	1475
CENPU	-0.0756601	6.50303	-1.79612	0.0909165	0.305806	-5.83512	2499	2517	2126	2329
CENPV	0.0685639	5.39852	1.07682	0.297144	0.574923	-6.46731	1076	1145	1008	1172
CENPW	0.0445734	5.54941	0.776175	0.448694	0.702817	-6.7937	1270	1213	1175	1222
CEP104	0.100579	5.8347	1.93557	0.0703523	0.266045	-5.41613	1462	1507	1429	1550
CEP120	-0.0138414	5.05886	-0.202888	0.841718	0.934364	-6.92514	890	915	774	900
CEP128	0.0987246	4.75697	1.35397	0.19411	0.465375	-5.93489	695	712	675	735
CEP135	0.0396056	4.91845	0.577321	0.571562	0.785645	-6.72723	812	794	745	800
CEP152	0.0447729	5.96237	0.837516	0.41434	0.677206	-6.87188	1594	1715	1536	1656
CEP164	-0.328611	6.04103	-6.02059	1.60303e-05	0.000728656	2.80073	2024	1955	1345	1625
CEP170	-0.0364661	5.86149	-0.667028	0.514029	0.749872	-6.97139	1656	1519	1364	1532
CEP170B	-0.174867	3.33121	-1.42278	0.17354	0.439085	-5.37089	276	300	223	254
CEP19	-0.00618436	1.96801	-0.0316663	0.97512	0.989547	-5.89839	107	103	100	96
CEP192	-0.0334353	5.44575	-0.553213	0.587579	0.79681	-6.91218	1164	1210	1069	1102
CEP250	-0.22397	6.69137	-5.48884	4.53377e-05	0.00165549	1.57866	2984	3034	2286	2537
CEP290	0.0634447	5.03711	0.920698	0.370552	0.638678	-6.50563	855	876	781	913
CEP350	0.0231451	6.95942	0.56905	0.577032	0.788537	-7.34035	3274	3375	3112	3211
CEP41	-0.048613	3.85402	-0.48042	0.637273	0.828629	-6.41539	406	385	355	361
CEP44	-0.00736839	5.16948	-0.0976554	0.923389	0.971469	-6.97788	911	1038	832	980
CEP55	0.0326803	4.40598	0.389635	0.701819	0.86234	-6.64565	553	575	532	548
CEP57	0.0479854	6.36247	0.958699	0.35163	0.622211	-6.87984	2215	2148	1924	2304
CEP57L1	-0.0639844	5.34397	-0.938509	0.361598	0.631252	-6.58733	1069	1168	1002	1000
CEP63	-0.00424488	4.6591	-0.0523603	0.958874	0.982943	-6.81076	699	662	647	625
CEP68	-0.0489659	4.23352	-0.539307	0.59692	0.803335	-6.51428	516	515	423	511
CEP70	0.145419	3.80068	1.42227	0.173685	0.439085	-5.52768	368	345	359	379
CEP72	-0.0456507	4.45241	-0.520336	0.609781	0.812055	-6.59984	576	621	550	536
CEP76	-0.0988194	3.43523	-0.807465	0.430953	0.689771	-6.05902	282	321	262	264
CEP78	0.0592447	5.54405	1.05851	0.305163	0.582215	-6.53273	1229	1233	1145	1256
CEP85	0.0352716	6.65897	0.856435	0.404096	0.66936	-7.05477	2690	2689	2426	2735
CEP85L	-0.139581	4.3607	-1.63588	0.120907	0.358506	-5.41325	575	585	490	496
CEP89	0.0863348	4.08609	0.896837	0.382781	0.649401	-6.20584	447	439	449	433
CEP95	0.152118	5.52461	2.43891	0.0264392	0.149462	-4.42622	1248	1108	1163	1284
CEP97	-0.035732	4.5129	-0.448677	0.659536	0.840067	-6.65659	625	620	532	605
CEPT1	0.0724446	4.97137	1.07042	0.29993	0.577486	-6.33663	835	812	787	834
CERCAM	-0.533739	3.23745	-4.21212	0.00062934	0.0115026	-0.230128	311	300	181	214
CERK	0.218488	2.8547	1.51363	0.14915	0.40661	-5.10291	190	171	182	211
CERKL	-0.045945	6.1379	-0.917941	0.371951	0.639918	-6.85274	1889	1964	1722	1771
CERS2	-0.208912	6.716	-5.19166	8.23378e-05	0.00248716	0.963443	3069	3018	2400	2529
CERS4	-0.451796	1.04557	-1.72876	0.102626	0.326694	-4.36991	66	63	44	44
CERS5	-0.0524412	4.17684	-0.554587	0.58666	0.796268	-6.48631	482	511	405	492
CERS6	0.0408665	4.99357	0.547283	0.591554	0.799411	-6.76961	871	823	732	902
CES2	-0.0767413	5.36256	-1.2502	0.228769	0.505459	-6.25903	1146	1128	1001	1018
CES3	-0.188714	1.5876	-0.816177	0.426094	0.68585	-5.46758	76	97	72	69
CETN2	-0.0780927	4.08427	-0.795728	0.437555	0.693862	-6.28962	492	448	376	458
CETN3	0.178319	3.64643	1.62211	0.123842	0.363178	-5.20181	311	323	307	365
CFD	-0.251411	3.62499	-2.0947	0.0520585	0.221946	-4.44589	331	396	279	290
CFDP1	0.0802244	4.52092	0.942804	0.359462	0.629172	-6.3116	567	637	576	613
CFL1	-0.0833163	8.99154	-2.46981	0.0248423	0.143433	-5.14349	14271	13945	12501	12426
CFL2	0.280062	3.83425	2.75072	0.0139759	0.0986308	-3.31035	339	358	372	420
CFLAR	-0.031258	5.36818	-0.524564	0.606904	0.810446	-6.9033	1122	1126	1001	1058
CGGBP1	-0.048594	6.60508	-1.171	0.258328	0.53712	-6.72317	2653	2679	2344	2481
CGREF1	0.0438658	4.79421	0.577965	0.571138	0.785466	-6.68515	748	722	716	704
CGRRF1	0.0720736	2.62014	0.459729	0.651746	0.836524	-6.00695	168	154	160	157
CHAC1	0.202089	3.38737	1.67186	0.113518	0.346795	-5.04592	277	248	280	285
CHAC2	-0.00636306	4.47288	-0.0750599	0.941075	0.978255	-6.74474	573	627	523	594
CHAF1A	-0.0391652	7.52616	-1.17246	0.257762	0.536122	-6.93309	5078	4987	4448	4719
CHAF1B	0.166641	5.96786	2.89014	0.0104538	0.0810135	-3.67701	1570	1609	1699	1645
CHAMP1	-0.0452975	6.95081	-1.04695	0.310305	0.586546	-6.94636	3273	3499	3000	3138
CHCHD1	0.0639744	4.97366	0.860232	0.40206	0.667412	-6.5389	790	868	749	872
CHCHD10	-0.0383348	6.51169	-0.909618	0.376197	0.644148	-6.9672	2527	2455	2157	2384
CHCHD2	0.0122265	8.53774	0.402337	0.692631	0.857329	-7.73083	9853	10090	8841	9994
CHCHD3	-0.154612	7.42172	-3.15265	0.00601324	0.0566687	-3.50074	4925	4812	4227	3972
CHCHD4	0.0170768	5.17256	0.2642	0.794917	0.912603	-6.94739	990	942	857	973
CHCHD5	0.0156057	3.9927	0.164153	0.871616	0.949675	-6.56854	421	431	390	416
CHCHD6	-0.00726885	3.49207	-0.0638369	0.949872	0.980685	-6.40715	314	293	272	293
CHCHD7	0.154111	5.55103	2.72834	0.0146389	0.102332	-3.87585	1181	1213	1194	1299
CHD1	0.079805	6.98176	2.06055	0.0555736	0.230289	-5.51884	3254	3370	3147	3404
CHD1L	0.0253117	7.16285	0.699318	0.494152	0.736482	-7.30143	3869	3782	3543	3744
CHD2	0.0639974	7.09291	1.64408	0.119187	0.35555	-6.21771	3589	3601	3473	3562
CHD3	-0.135091	6.97204	-3.59406	0.00234837	0.029569	-2.47779	3544	3542	2930	3109
[truncated: 11,769 more rows]

## Sheet: 6h_down
Supplemental Table 5: The RNA transcriptome analysis of AID-KMT2D HUDEP-2 cells with 5-Ph-IAA treatment for 6 hours, 12 hours and 24 hours vs. without 5-Ph-IAA treatment grown in the expansion culture.
gene_name	logFC	AveExpr	t	P.Value	adj.P.Val	B	C25_D6_1	C25_D6_2	C25_I6_1	C25_I6_2
AC007405.6	-0.634927	1.05473	-2.17955	0.0441866	0.201995	-3.72777	62	78	31	55
AC009005.2	-0.760436	1.64013	-2.96148	0.0090015	0.0739111	-2.47822	91	131	48	74
AC109309.4	-1.35201	0.87477	-4.77656	0.00019276	0.00477668	0.422433	77	80	26	31
ACAP1	-0.773411	1.0121	-2.76126	0.0136739	0.0972287	-2.80408	62	80	41	36
ACHE	-0.606517	3.88131	-5.66348	3.20924e-05	0.00126888	2.55159	510	468	310	292
ADAMTSL4	-0.678924	4.2871	-7.70857	7.61178e-07	6.84785e-05	6.16834	665	664	385	392
AGRN	-0.855563	7.08134	-22.2762	1.08186e-13	4.4771e-10	21.7026	5016	4798	2463	2612
AHNAK	-0.806155	7.73332	-24.6134	2.20291e-14	2.73491e-10	23.3039	7562	7600	3839	4279
AHNAK2	-2.01093	2.21261	-9.34047	5.68388e-08	8.82067e-06	7.18537	230	271	63	53
ALG1L9P	-0.802791	0.0410966	-2.22081	0.0407693	0.192234	-3.62048	37	35	23	16
AMHR2	-1.55895	0.854549	-5.15067	8.94764e-05	0.0026386	0.94427	78	88	31	22
ANO8	-0.654752	3.22847	-4.72754	0.000213383	0.00519341	0.797063	301	331	201	176
APOBEC3F	-1.23177	0.954247	-4.34044	0.000479847	0.00940854	-0.214051	72	88	28	35
APOBR	-0.877621	1.58849	-3.73957	0.00172092	0.0236079	-1.08658	111	107	63	49
AQP1	-1.22394	0.303139	-3.56184	0.0025157	0.0310446	-1.62604	0	0	0	0
AQP1	-1.22394	0.303139	-3.56184	0.0025157	0.0310446	-1.62604	49	52	15	26
AQP3	-0.88113	5.75606	-14.1677	1.26724e-10	9.25459e-08	14.7042	2012	1934	1032	977
ARHGAP22	-1.48849	0.700847	-4.57983	0.000290263	0.00647709	0.0365509	86	62	19	30
ARHGAP23	-0.817733	5.26148	-12.5009	8.372e-10	2.96967e-07	12.8288	1396	1345	726	730
ARHGEF2	-0.63395	6.92831	-16.4151	1.31699e-11	1.4864e-08	16.9523	4165	4010	2357	2573
ARHGEF37	-0.899517	1.21054	-3.41195	0.00346432	0.038931	-1.69787	81	89	34	52
ARID3A	-0.748967	3.23267	-5.72065	2.86851e-05	0.00116002	2.68961	339	316	187	178
ARID3B	-0.823238	3.26576	-6.45674	7.02848e-06	0.000380684	4.00397	336	353	169	195
ASIC4	-1.83738	1.0992	-6.33822	8.77104e-06	0.00045013	2.67575	98	121	23	34
ATP1B2	-1.01952	4.63949	-12.5339	8.04891e-10	2.93904e-07	12.7369	959	950	445	437
ATP8B2	-0.788451	3.98865	-8.03759	4.39307e-07	4.5335e-05	6.68734	552	571	295	313
AXL	-1.03998	4.67386	-12.5518	7.87885e-10	2.93904e-07	12.766	1020	950	453	444
AZU1	-0.835746	1.22113	-3.32779	0.00414486	0.0437944	-1.84119	88	79	42	45
BAIAP2	-0.897189	4.11168	-8.61279	1.73674e-07	2.20016e-05	7.58096	688	586	305	333
BAIAP2-AS1	-1.13988	1.54267	-4.90707	0.000147228	0.00390562	0.918185	111	121	50	48
BCL3	-2.35926	0.216951	-6.61374	5.25675e-06	0.000309301	2.0236	71	70	11	14
BCRP3	-0.791404	0.958892	-2.90156	0.0102069	0.0798248	-2.57438	68	69	32	42
BIN1	-1.13811	-0.0456369	-2.96616	0.00891339	0.0734305	-2.5789	31	47	17	15
BTG2	-0.87044	3.53108	-6.70069	4.48217e-06	0.000274119	4.44864	383	462	207	223
C11orf21	-0.603	6.61738	-12.8458	5.57089e-10	2.56158e-07	13.1937	3153	3371	1897	2121
C11orf95	-0.776729	3.7411	-6.79389	3.78253e-06	0.000237172	4.62064	441	503	249	265
C17orf72	-0.771212	0.371843	-2.35473	0.0312942	0.164001	-3.43265	52	39	23	26
C17orf99	-1.01195	2.00182	-4.29854	0.000524208	0.0100433	-0.0337761	133	174	85	59
C1RL	-0.618152	3.15903	-4.57276	0.000294579	0.00654239	0.49814	320	277	169	194
C20orf112	-1.05892	4.42408	-11.7691	2.04984e-09	5.53234e-07	11.8015	845	826	334	418
C5AR2	-0.698624	2.95822	-4.96028	0.000131979	0.00356622	1.26135	260	273	142	165
C6orf201	-0.914074	-0.175101	-2.41336	0.0278324	0.153596	-3.36602	36	29	13	19
C8G	-0.983227	-0.0674038	-2.38761	0.029306	0.158398	-3.39607	39	33	10	27
CA11	-0.783771	0.842633	-2.67866	0.0162204	0.108758	-2.93809	73	54	35	33
CA13	-0.775572	0.137518	-2.14796	0.0469801	0.208455	-3.71994	32	46	17	25
CAMKK1	-0.632805	3.01528	-4.14325	0.000728258	0.0126985	-0.338157	246	297	171	156
CAPG	-0.738166	1.58161	-3.28198	0.00456933	0.0467713	-1.90613	105	102	60	56
CAPN5	-0.971817	4.00898	-9.56429	4.08066e-08	6.75485e-06	8.92008	627	586	293	286
CARNS1	-0.970553	0.370532	-2.50936	0.0229312	0.137134	-3.20678	38	62	15	34
CASKIN2	-0.894147	0.960699	-3.30607	0.00434102	0.0452509	-1.90287	73	69	34	37
CASS4	-0.89787	1.00237	-3.25863	0.00480196	0.048508	-1.97801	66	81	37	36
CCDC88B	-0.641303	1.71675	-2.90467	0.0101405	0.0796419	-2.58453	117	104	56	77
CCR7	-1.30946	0.573691	-4.18358	0.000668564	0.0119945	-0.599248	61	64	26	21
CDC42BPG	-0.931992	3.31371	-7.36427	1.37362e-06	0.000105112	5.51403	384	355	179	183
CDC42EP4	-0.978132	4.651	-11.2149	4.16282e-09	9.93873e-07	11.2022	1006	894	454	448
CDKN1C	-1.5669	2.64321	-9.49329	4.53024e-08	7.40039e-06	7.94138	291	287	90	92
CDKN2D	-0.682437	1.52284	-2.67436	0.0163646	0.109347	-2.9706	109	88	43	74
CDRT15P1	-1.08195	-0.359076	-2.62749	0.01802	0.116399	-3.09394	28	32	17	10
CLCF1	-1.91708	-0.456087	-4.59568	0.000280808	0.00632711	-0.562883	33	43	10	8
CLIP2	-1.2137	3.73168	-10.5868	9.61037e-09	2.05712e-06	10.0996	556	535	194	247
COL2A1	-1.6197	2.36868	-8.11644	3.85887e-07	4.05999e-05	6.03539	255	234	58	93
CRB2	-0.845436	1.78747	-3.46264	0.00310916	0.0361425	-1.57796	154	100	61	68
CREB3L1	-1.30446	-0.0504869	-3.15682	0.00596037	0.0563387	-2.3096	56	29	15	15
CRIP2	-1.11039	1.68243	-4.90361	0.000148281	0.00390851	0.959654	120	134	47	63
CSPG4P11	-1.21537	0.965757	-4.35696	0.000463421	0.00919069	-0.182381	80	79	35	29
CTAGE7P	-1.26631	0.486957	-3.91312	0.00118822	0.0180635	-1.03972	65	52	19	26
CTC-251D13.1	-1.09468	0.102746	-3.05689	0.00736312	0.0651162	-2.42137	45	39	14	23
CTD-2555C10.3	-0.891165	1.86345	-4.2407	0.000592389	0.0110098	-0.153597	141	125	70	64
CYP2W1	-1.65055	1.7282	-7.06182	2.33752e-06	0.000159452	4.15818	167	148	52	42
CYP4F12	-2.53744	0.598225	-7.67879	8.00564e-07	7.00547e-05	3.38772	102	94	13	18
DAB2IP	-1.19844	-0.0120492	-3.34267	0.00401557	0.042903	-2.02947	38	42	16	16
DBN1	-0.690804	4.67522	-8.71002	1.49056e-07	1.98981e-05	7.75336	910	840	474	540
DBNDD2	-1.22887	-0.140217	-3.20203	0.00541537	0.0528137	-2.26248	44	31	13	16
DDR1	-1.45087	0.587068	-4.69765	0.000227055	0.00538984	0.157884	65	68	20	25
DEGS2	-0.837153	3.32623	-5.89496	2.04248e-05	0.000868405	3.01082	354	365	213	168
DLC1	-0.835087	1.33012	-3.45696	0.0031471	0.0364451	-1.60858	90	90	44	50
DLG4	-0.693069	2.88593	-4.7843	0.000189694	0.00472901	0.925368	252	254	132	161
DNAH17	-0.595995	1.03295	-2.24228	0.03909	0.187448	-3.63089	73	62	39	44
DYRK1B	-0.589477	3.39574	-4.94001	0.000137589	0.00370236	1.19836	344	351	202	230
EDRF1-AS1	-1.04925	0.180128	-2.40759	0.0281562	0.154753	-3.35949	31	60	29	13
EFCAB12	-0.835771	0.50663	-2.31076	0.0341514	0.172211	-3.49819	44	59	17	40
EFNA3	-0.826417	0.0606079	-2.35065	0.03155	0.164439	-3.44202	38	36	16	23
EFNA3	-0.826417	0.0606079	-2.35065	0.03155	0.164439	-3.44202	0	0	0	0
EFNA4	-0.958907	0.710812	-3.11846	0.00646465	0.0596275	-2.23893	56	66	34	25
EHD1	-0.624487	6.02437	-12.5952	7.48278e-10	2.93904e-07	12.9469	2170	2182	1289	1353
EHD2	-1.0643	1.26396	-4.09721	0.000803045	0.0136014	-0.518432	100	87	34	50
EIF5AP2	-2.21157	-0.391115	-4.85776	0.000162972	0.00413483	-0.213404	53	36	5	14
EPN3	-2.58823	-0.587271	-6.2959	9.49745e-06	0.000481269	1.27504	42	45	8	5
EVPL	-0.727537	6.14484	-14.8988	5.87324e-11	4.86109e-08	15.4762	2517	2390	1315	1458
EXOC3L2	-2.22653	-0.150009	-5.76746	2.6174e-05	0.00106541	0.865296	52	52	10	10
F8A2	-0.882883	-0.145994	-2.34782	0.0317282	0.16509	-3.45297	34	31	19	14
FAM214B	-1.70483	2.79991	-10.437	1.17997e-08	2.40152e-06	9.08172	357	321	88	106
FBLN2	-1.1003	1.72254	-4.98136	0.000126394	0.00347165	1.10418	134	125	60	53
FCGR2A	-0.800372	0.274135	-2.32524	0.0331846	0.169542	-3.4749	39	46	27	19
FGD4	-0.61973	1.12614	-2.4098	0.028032	0.1544	-3.3772	70	75	40	48
FGFR1	-0.6793	3.5256	-5.38403	5.58881e-05	0.00189577	2.04966	431	356	227	231
FGFR3	-1.35682	3.56534	-11.419	3.19661e-09	8.09916e-07	10.9157	527	493	180	192
FNDC4	-1.12013	-0.196787	-2.82623	0.0119461	0.0887025	-2.80033	34	34	19	11
FOSL2	-1.28634	2.27058	-6.87006	3.29553e-06	0.000214209	4.3155	216	190	72	83
FOXH1	-1.62445	1.06362	-5.92324	1.93374e-05	0.000834403	2.14263	93	104	29	30
GABBR1	-0.887799	0.206376	-2.56272	0.0205729	0.127643	-3.13464	37	47	23	19
GAS2L1	-0.797118	6.3068	-16.748	9.64179e-12	1.29714e-08	17.2604	2859	2760	1496	1531
GAS2L2	-0.692895	1.01803	-2.5776	0.0199577	0.125013	-3.10267	68	70	34	46
GCSAM	-0.973511	0.413831	-2.9438	0.00934195	0.0758768	-2.5468	59	42	22	25
GJC2	-1.87366	1.25214	-6.66957	4.74476e-06	0.000281848	3.21321	130	116	23	41
GLIPR2	-0.836529	-0.0463234	-2.23366	0.0397565	0.189517	-3.60385	34	35	13	24
GMPSP1	-1.09514	-0.185701	-2.83751	0.0116685	0.0872681	-2.78252	34	34	18	12
GPR146	-0.923065	0.221159	-2.7125	0.0151264	0.104679	-2.91403	39	47	18	24
GPR56	-0.705154	5.78689	-12.9833	4.74792e-10	2.26713e-07	13.4072	1877	1919	1067	1112
GPSM1	-0.668681	1.27	-2.57264	0.0201606	0.125801	-3.12314	90	74	39	58
HDAC11	-0.87024	1.53304	-3.69137	0.00190755	0.0256301	-1.17775	95	116	50	57
HES2	-0.942176	2.9103	-6.52329	6.21172e-06	0.000345823	4.05181	285	276	125	148
HMGB1P10	-0.646787	2.62592	-2.45291	0.0257038	0.147056	-3.53709	173	245	181	86
HMOX1	-0.623919	1.45353	-2.32788	0.033011	0.169212	-3.54009	83	101	40	75
HNRNPA1P59	-0.919285	-0.286069	-2.33976	0.0322411	0.166641	-3.47056	29	31	11	19
HSPA12B	-0.882074	1.3962	-3.58509	0.00239377	0.029868	-1.3787	105	87	51	46
ICOSLG	-0.807126	0.597821	-2.68082	0.0161484	0.10851	-2.93957	54	53	25	32
ID1	-0.588557	4.57691	-7.07804	2.27111e-06	0.000157518	5.07364	757	821	460	521
IFI27L2	-0.893006	0.138537	-2.47577	0.0245449	0.142273	-3.26327	48	33	22	18
IL1RN	-1.68064	0.790416	-5.36655	5.78805e-05	0.00194341	1.19259	97	71	21	27
IL2RB	-1.19111	3.76781	-10.8683	6.5747e-09	1.48409e-06	10.4545	572	537	212	242
IMPA2	-1.1211	0.726645	-3.66931	0.00199961	0.0264946	-1.35049	73	58	31	25
IQSEC2	-0.858561	1.33475	-3.36056	0.00386544	0.0418756	-1.77673	85	98	38	57
IRF6	-0.804557	3.14217	-5.79752	2.46827e-05	0.00101806	2.82577	296	332	171	165
ITGB4	-0.738188	1.47419	-2.63096	0.0178921	0.115995	-3.03993	104	90	36	79
JUNB	-0.658336	5.82238	-12.2878	1.08173e-09	3.4435e-07	12.5889	1952	1876	1114	1156
JUP	-0.622516	7.19738	-16.6617	1.04482e-11	1.29714e-08	17.1721	4936	4871	2931	3031
KANK2	-0.668744	5.96995	-11.6194	2.47556e-09	6.53916e-07	11.7511	2228	2030	1249	1257
KBTBD3	-0.749867	0.790752	-2.53459	0.0217857	0.132596	-3.16532	68	53	28	39
KCTD17	-0.735132	0.777061	-2.43342	0.0267328	0.150312	-3.32179	71	49	33	33
KDM4D	-0.856846	-0.036304	-2.2924	0.035415	0.176088	-3.52441	36	34	13	24
KIAA0125	-1.014	-0.293243	-2.61449	0.018507	0.11868	-3.1034	35	27	13	15
KIAA1161	-1.21447	-0.353309	-2.93652	0.0094858	0.0764716	-2.67629	28	36	9	17
KIF21B	-0.770416	3.20078	-6.00996	1.63612e-05	0.000738632	3.21279	321	325	170	184
KIF26A	-0.726822	7.649	-21.2976	2.20839e-13	6.85429e-10	21.0263	7074	6842	3698	4175
KIF5A	-0.825124	3.04469	-5.9028	2.01173e-05	0.000861227	3.00718	313	279	145	167
KISS1R	-1.12708	0.250583	-2.82484	0.0119808	0.0887197	-2.74673	57	39	12	32
KLF8	-0.626782	2.60397	-3.84917	0.00136188	0.0200476	-0.877293	197	210	108	139
KLHDC8A	-1.23263	1.22361	-4.61492	0.000269754	0.00612247	0.321513	89	104	31	46
KLHDC8B	-0.646873	5.83501	-12.3124	1.04993e-09	3.4435e-07	12.618	1927	1919	1125	1174
KLK1	-1.51795	0.772671	-5.16207	8.74298e-05	0.00260923	0.915962	81	74	23	27
KNDC1	-0.797862	-0.0378192	-2.15662	0.0461988	0.206676	-3.70653	33	35	22	15
KRT13	-1.23052	0.315557	-3.49645	0.00289273	0.0343542	-1.72176	63	41	19	21
LAMA5	-0.964795	4.9785	-12.6251	7.22167e-10	2.93904e-07	12.9266	1134	1241	542	595
LGALS12	-2.22815	-0.96078	-5.36085	5.85449e-05	0.00194341	0.203508	28	31	5	6
LILRP1	-0.88082	0.481072	-2.80929	0.0123753	0.0907597	-2.74725	53	48	27	24
LINC00341	-0.597574	2.15033	-3.23064	0.00509625	0.0506159	-2.02482	144	149	91	90
LL22NC03-2H8.4	-0.637861	0.954216	-2.19253	0.0430846	0.199514	-3.69905	69	60	47	32
LPAR5	-0.856156	3.98165	-8.70072	1.51243e-07	1.99754e-05	7.69454	565	579	287	304
LTBP2	-0.965479	1.94543	-4.68219	0.000234474	0.00551325	0.649072	158	132	67	71
MAP1A	-1.93864	2.3395	-7.74822	7.11865e-07	6.49641e-05	5.47753	227	310	81	52
MAP3K6	-0.86044	2.37812	-4.55977	0.000302692	0.00662772	0.485348	182	196	78	119
MAPK15	-0.885355	1.67619	-3.76744	0.00162149	0.0227209	-1.02921	105	130	49	70
MATN1	-0.981508	-0.179482	-2.62483	0.0181187	0.116793	-3.07695	32	34	13	18
MEX3B	-0.722425	3.28652	-5.81457	2.38762e-05	0.000994804	2.86336	338	336	187	195
MIDN	-1.02391	5.81314	-18.5613	1.93486e-12	4.00356e-09	18.712	2154	2162	985	1002
MIR22HG	-0.592718	2.58305	-3.3645	0.00383307	0.0418546	-1.81939	221	176	131	115
MIR570	-0.994453	0.463159	-2.94952	0.0092305	0.0752449	-2.5331	59	46	18	32
MKLN1-AS	-0.688884	1.0552	-2.41442	0.0277729	0.153449	-3.36461	86	58	36	46
MLXIPL	-0.731873	2.44927	-4.27119	0.000555401	0.0105123	-0.0558138	198	180	110	103
MOB3C	-0.602384	3.53787	-4.88061	0.000155473	0.00403806	1.06619	378	394	204	274
MORN1	-0.930433	1.79022	-4.25616	0.000573338	0.0107636	-0.13701	132	125	52	75
MRC2	-1.11049	0.052079	-3.08444	0.00694688	0.062542	-2.38965	43	38	20	15
MRGPRE	-1.43583	1.51831	-5.42757	5.1227e-05	0.00178342	1.72184	107	149	46	41
MROH6	-0.713564	3.68902	-6.40836	7.69173e-06	0.000409841	3.94213	426	464	240	267
MYLK3	-0.962748	0.776721	-3.36092	0.00386246	0.0418756	-1.83731	66	62	28	33
MYRF	-1.39558	1.09977	-4.86389	0.000160926	0.00411091	0.655686	110	79	29	37
N4BP3	-0.991443	0.670707	-3.36263	0.00384839	0.0418546	-1.85173	61	59	26	30
NAB2	-0.827287	5.08193	-12.332	1.02538e-09	3.4435e-07	12.6127	1213	1216	624	657
NBPF24	-0.79809	-0.128645	-2.19704	0.0427071	0.198377	-3.65352	32	32	16	18
NHLRC4	-0.806337	2.80325	-4.97914	0.000126972	0.00347981	1.29501	255	243	109	160
NINJ1	-0.697889	1.50256	-2.84318	0.0115314	0.0866813	-2.67873	87	107	62	50
NOV	-1.89861	0.165409	-5.09755	9.96844e-05	0.00286477	0.396089	51	66	11	18
NPTX1	-0.589591	3.12979	-4.31122	0.000510364	0.00985233	-0.017556	276	303	161	199
NQO1	-0.624655	2.06431	-3.29597	0.00443534	0.0460407	-1.8955	143	136	79	90
NSUN5P2	-0.651381	0.966655	-2.16804	0.0451864	0.20407	-3.73667	82	52	42	36
NUMBL	-0.598168	5.53198	-10.4013	1.23938e-08	2.48175e-06	10.1714	1522	1545	898	998
NYNRIN	-1.31575	-0.299342	-3.40345	0.00352767	0.0394558	-2.02525	34	34	13	12
OOEP	-0.72993	0.644496	-2.29244	0.0354119	0.176088	-3.52985	54	53	38	24
ORAI2	-0.619358	4.49373	-7.45778	1.16832e-06	9.23869e-05	5.73844	772	733	423	494
OSBPL5	-0.705859	4.30941	-7.6806	7.98113e-07	7.00547e-05	6.12182	719	647	362	421
OSGIN1	-0.852967	0.56968	-2.71163	0.0151536	0.104708	-2.89303	60	47	30	25
OSM	-0.738351	4.18659	-7.97911	4.83905e-07	4.73046e-05	6.60668	659	608	341	369
OTOP2	-1.08488	-0.118671	-2.71457	0.0150618	0.104406	-2.94634	47	27	14	17
P2RX1	-1.11104	3.07218	-7.1478	2.00712e-06	0.000142755	5.10045	302	365	150	138
PALM	-0.80426	2.91588	-5.62318	3.47439e-05	0.00136071	2.49236	274	262	143	144
PARD6A	-0.613188	0.95204	-2.2776	0.0364649	0.178444	-3.57026	65	63	36	42
PCED1B	-0.651542	2.12389	-3.43401	0.00330503	0.0375407	-1.64028	141	153	78	97
PDK2	-0.678555	2.39028	-3.92616	0.00115565	0.0177128	-0.715465	190	167	100	108
PEAR1	-3.12749	-1.34497	-7.26732	1.62666e-06	0.000119497	1.8865	28	34	2	4
PFKFB4	-1.34077	2.90603	-8.79197	1.31155e-07	1.78932e-05	7.35588	325	318	103	135
PHOSPHO1	-0.854115	3.607	-7.5351	1.02284e-06	8.3543e-05	5.84357	458	424	221	235
PHYHIP	-1.3994	0.207486	-3.91784	0.00117634	0.0179564	-1.13486	43	58	19	16
PLEC	-0.679107	8.26206	-23.0107	6.45429e-14	4.0065e-10	22.2509	10413	10517	5830	6406
PLEKHA4	-0.999764	2.77243	-6.58525	5.53988e-06	0.000321391	4.11368	258	262	112	131
PLEKHO2	-0.606341	3.19409	-4.72359	0.000215142	0.00520266	0.791747	302	305	185	188
PLVAP	-0.763598	0.612365	-2.39173	0.0290651	0.157642	-3.38088	61	46	34	25
PLXNA3	-0.614456	4.45894	-6.56978	5.70017e-06	0.000327628	4.17767	681	788	434	461
PLXNB2	-0.751616	5.81105	-13.4623	2.75048e-10	1.70736e-07	13.9466	1909	2017	1042	1139
PODNL1	-0.763997	1.50633	-3.29434	0.00445073	0.0460849	-1.88534	93	106	51	58
POLD4	-0.848858	0.842591	-2.60944	0.0186994	0.119491	-3.04811	52	79	41	27
POLN	-0.876239	-0.18652	-2.32595	0.0331379	0.169542	-3.48399	31	32	18	14
PPP1R18	-0.840684	-0.195238	-2.24702	0.0387278	0.18607	-3.58897	33	29	17	15
PPP1R1B	-0.703903	1.31053	-2.85903	0.0111561	0.0847114	-2.64417	92	78	48	49
PRDM11	-0.816493	4.20157	-8.36261	2.58725e-07	2.97414e-05	7.20942	640	673	361	338
PRF1	-1.57684	-0.707937	-3.43572	0.00329304	0.0374387	-2.08015	29	27	5	14
PSMG3-AS1	-1.01003	0.293452	-3.03902	0.00764597	0.0666887	-2.41681	49	44	18	25
PTCH1	-0.635677	3.93585	-6.32393	9.00969e-06	0.00046031	3.78096	498	529	301	317
PTGS1	-0.927459	3.08755	-6.58911	5.50063e-06	0.000320612	4.20046	335	296	157	153
PTK2B	-0.706845	5.36915	-11.2637	3.90673e-09	9.51021e-07	11.3266	1397	1446	803	827
PTP4A3	-0.992111	3.3047	-7.32367	1.47419e-06	0.000111598	5.44521	372	376	191	163
PTPRH	-1.16502	0.643276	-3.47516	0.00302721	0.035489	-1.68067	77	51	20	33
PVRL2	-0.742173	0.397698	-2.30973	0.034221	0.172354	-3.49791	45	46	21	30
RAP1GAP	-0.608639	5.21249	-9.20558	6.95913e-08	1.01644e-05	8.47481	1234	1234	694	822
RARG	-2.24253	-0.318424	-5.61051	3.56235e-05	0.00139077	0.634512	46	47	7	11
RASGEF1A	-1.51383	-0.209849	-3.73493	0.00173806	0.0237905	-1.55148	32	47	14	11
RASGRP2	-1.23781	0.173177	-3.41868	0.00341494	0.0385773	-1.87376	38	56	18	18
RBM47	-0.691729	4.00433	-6.96054	2.80072e-06	0.000186941	4.91003	563	534	321	315
RGS14	-0.866756	3.61392	-7.05343	2.37268e-06	0.000160966	5.05462	419	474	203	255
RHOC	-0.654545	2.82689	-3.93287	0.00113925	0.0175482	-0.733818	228	253	115	174
RIMS3	-0.885193	2.34665	-4.06335	0.000862956	0.014269	-0.452146	155	224	78	112
RIPK3	-0.666674	0.685994	-2.2144	0.0412838	0.19363	-3.64704	52	56	36	28
RNF43	-0.681393	1.31264	-2.78015	0.013148	0.0945728	-2.77833	91	78	46	52
RP11-1055B8.7	-1.10395	0.711245	-3.63981	0.00212969	0.0275993	-1.40079	66	62	32	24
RP11-12A20.7	-0.740903	0.0692676	-2.13468	0.0482016	0.211835	-3.73673	37	35	21	19
RP11-1391J7.1	-1.1947	0.433347	-3.65037	0.00208218	0.0271592	-1.45527	48	62	21	23
RP11-141O15.1	-0.716765	0.314346	-2.21374	0.0413373	0.193808	-3.63301	41	44	22	26
RP11-30L15.4	-0.721893	0.480566	-2.30058	0.0348467	0.174938	-3.51271	44	52	24	30
RP11-423H2.3	-0.836807	1.04658	-2.71034	0.015194	0.104796	-2.88762	96	57	32	46
RP11-434I12.2	-0.807957	-0.0721787	-2.20005	0.0424576	0.197568	-3.64899	33	34	14	22
RP11-522I20.3	-0.84166	0.754258	-2.66184	0.0167919	0.111045	-2.96565	54	68	23	42
RP11-631M6.2	-0.754962	0.96374	-2.33234	0.0327203	0.168208	-3.4862	80	58	25	55
RP11-723O4.2	-0.864844	0.96073	-3.08093	0.00699862	0.0628257	-2.27788	68	73	29	44
RP11-861A13.4	-0.622359	1.09789	-2.34535	0.0318847	0.165281	-3.47672	80	63	42	44
RP11-958N24.2	-0.910965	0.615387	-2.80573	0.0124671	0.0910468	-2.74428	52	60	35	22
RP13-516M14.4	-0.8138	0.064087	-2.32324	0.0333165	0.169727	-3.47991	40	34	17	22
RPL9P8	-1.53465	0.925169	-4.99256	0.000123529	0.00340802	0.753996	103	73	23	33
RYR1	-0.852332	-0.111465	-2.18576	0.0436564	0.200813	-3.66826	30	36	22	13
S100A16	-1.87707	-0.0476674	-4.83254	0.000171682	0.00431464	-0.0672279	45	54	15	10
S100A3	-0.662592	1.50851	-2.89656	0.0103142	0.0802324	-2.58637	92	100	55	58
SAT2	-1.04246	-0.328103	-2.59426	0.0192896	0.122188	-3.13501	33	28	10	18
SCARNA15	-1.37554	0.200388	-3.98749	0.00101411	0.0161	-1.03519	54	45	18	17
SCARNA15	-1.37554	0.200388	-3.98749	0.00101411	0.0161	-1.03519	2	6	7	3
SCARNA15	-1.37554	0.200388	-3.98749	0.00101411	0.0161	-1.03519	0	0	0	0
SCUBE3	-0.670474	0.573751	-2.16607	0.0453595	0.204643	-3.71077	48	52	33	26
SELPLG	-0.82597	6.18024	-17.1563	6.62772e-12	1.17547e-08	17.6155	2630	2569	1347	1398
SEMA6B	-1.82459	2.15155	-7.59831	9.18019e-07	7.66441e-05	5.15684	268	189	51	68
SEMA6C	-0.652987	2.18653	-3.50769	0.00282413	0.0338106	-1.50487	144	163	90	92
SEPT5	-1.27096	3.97342	-12.5515	7.88169e-10	2.93904e-07	12.407	652	662	242	267
SEPT9	-0.735716	1.79574	-3.31749	0.00423677	0.0445758	-1.84322	110	132	57	79
SERTAD3	-0.58966	3.97846	-6.00789	1.64262e-05	0.00073888	3.19316	526	514	323	324
SFXN3	-0.60432	2.90795	-4.23919	0.000594288	0.0110285	-0.137807	260	238	147	159
SGK1	-0.69778	0.901126	-2.47994	0.0243389	0.141611	-3.25377	57	71	34	39
SH2D3A	-0.652357	2.48799	-3.82198	0.00144325	0.0208349	-0.921253	182	197	98	128
SH3BP1	-1.04514	3.26409	-7.30383	1.52609e-06	0.000114466	5.40156	412	335	154	183
SH3TC2	-0.771949	4.852	-10.6917	8.336e-09	1.81564e-06	10.5682	1029	1004	526	588
SIGIRR	-0.68494	2.40379	-4.00588	0.000975178	0.0156419	-0.562917	177	184	95	115
SKIL	-0.994287	2.23779	-5.28965	6.75526e-05	0.00214313	1.78012	193	166	76	92
SLC22A4	-0.720896	1.66778	-3.31487	0.00426048	0.0447154	-1.84669	107	112	57	67
SLC25A29	-0.94714	3.86354	-9.06848	8.56701e-08	1.19505e-05	8.19714	564	525	248	280
SLC25A42	-0.63921	4.76151	-7.78379	6.70463e-07	6.21179e-05	6.26392	901	925	485	615
SLC2A3	-0.703071	2.52756	-3.95707	0.001082	0.0169608	-0.661773	224	174	114	113
SLC30A1	-0.625641	3.92318	-5.80034	2.45476e-05	0.00101586	2.80804	478	537	311	304
SLC4A8	-0.75976	0.315601	-2.25919	0.0378122	0.183231	-3.56895	42	44	28	20
SLC6A19	-0.929182	6.33891	-19.2968	1.05027e-12	2.60782e-09	19.4126	3076	2946	1372	1589
SLFN14	-1.32113	0.998184	-4.75095	0.000203265	0.00498722	0.442265	89	80	34	29
SMAD3	-0.622321	4.39141	-6.83798	3.49215e-06	0.000222333	4.66928	748	656	418	434
SMIM5	-1.16973	2.75772	-6.48519	6.66638e-06	0.000367836	3.93532	249	301	92	138
SNPH	-0.842849	1.50601	-3.68623	0.00192863	0.0258016	-1.18913	103	101	50	56
SOCS1	-1.05412	1.88092	-5.01646	0.000117628	0.00326833	1.21322	135	150	66	62
SPI1	-0.947834	3.81752	-7.67375	8.07439e-07	7.01004e-05	6.09053	589	471	248	263
STMN3	-0.761876	4.72621	-9.26838	6.33165e-08	9.58628e-06	8.5911	979	881	470	556
STX16-NPEPL1	-0.82394	-0.139592	-2.17346	0.0447132	0.203219	-3.68465	30	34	20	14
SUSD3	-0.871605	0.637494	-2.80236	0.012555	0.0916342	-2.74815	57	55	34	24
SYBU	-0.620521	3.20486	-4.88065	0.00015546	0.00403806	1.09812	313	302	180	194
SYNC	-1.07568	1.48985	-4.45797	0.000374683	0.00776577	0.150351	121	99	43	54
SYTL1	-1.00722	2.65046	-6.13626	1.28495e-05	0.000611215	3.33512	227	253	100	123
SYTL3	-0.73572	1.66605	-3.05458	0.00739895	0.0651162	-2.31414	96	125	69	55
TAS1R3	-1.04745	1.22781	-3.96616	0.00106123	0.0166564	-0.748298	91	90	32	51
TCAP	-0.678025	1.50193	-2.80821	0.0124031	0.0908464	-2.7393	111	83	53	59
TCP11L2	-1.11201	0.468532	-3.11046	0.00657503	0.0604005	-2.28365	62	47	32	17
TIGD3	-1.25573	0.083877	-3.48048	0.00299304	0.0351881	-1.80645	39	49	14	20
TMCC2	-0.623071	3.12987	-4.47108	0.000364509	0.00764423	0.299974	290	293	190	166
TMEM173	-0.758413	6.42771	-16.8973	8.3991e-12	1.29714e-08	17.4022	3086	2948	1582	1756
TMEM63C	-1.23447	0.618949	-3.93478	0.00113461	0.0174984	-0.963404	71	56	21	29
TMEM81	-0.960119	0.269242	-2.76038	0.0136989	0.0973511	-2.83917	38	53	18	25
TNK2	-0.600511	5.56766	-10.4447	1.16755e-08	2.40152e-06	10.2282	1607	1538	948	993
TNXB	-0.809916	5.33751	-13.0098	4.60498e-10	2.26713e-07	13.4153	1479	1405	741	798
TREML2	-2.02213	0.0377513	-5.15191	8.92517e-05	0.00263824	0.359805	53	57	17	9
TSC22D4	-0.647429	6.56559	-15.3738	3.62614e-11	3.21561e-08	15.9511	3245	3142	1823	1993
TSGA10	-0.716016	1.93753	-3.46819	0.00307256	0.0358513	-1.56887	146	119	69	81
TUBB4A	-1.64018	-0.419695	-3.78338	0.00156723	0.0222113	-1.57426	42	29	13	8
TUFT1	-0.836167	0.988703	-3.00922	0.00814154	0.0689509	-2.39524	63	80	34	40
TYRO3	-0.5868	4.21698	-6.02914	1.57694e-05	0.000722601	3.20532	591	635	394	371
UCP3	-0.759797	0.408408	-2.32279	0.0333465	0.16974	-3.47918	43	49	29	22
USP9Y	-0.598952	1.51337	-2.44616	0.0260557	0.148454	-3.35423	95	94	45	74
VASN	-1.47791	1.36735	-5.82608	2.33472e-05	0.000985903	2.23047	106	126	36	41
VENTX	-0.700969	1.07972	-2.5197	0.0224548	0.135197	-3.19836	77	67	49	35
VWA7	-0.83931	0.0358271	-2.29825	0.0350076	0.175567	-3.51493	31	43	16	22
WDR66	-1.02452	0.153441	-2.66784	0.016586	0.110174	-2.98612	42	43	12	30
ZCCHC24	-0.751627	2.15058	-4.01211	0.000962336	0.015496	-0.551471	162	148	78	94
ZDHHC11B	-0.798562	0.190782	-2.33361	0.0326375	0.167921	-3.46351	42	38	24	19
ZFP36	-0.686269	3.63813	-6.07987	1.43093e-05	0.000670379	3.34883	444	406	246	248
ZMIZ1	-1.29864	3.27397	-8.47117	2.17429e-07	2.62075e-05	7.13098	384	437	126	189
ZMYND10	-0.745906	0.803917	-2.63545	0.0177281	0.115233	-3.00688	64	57	32	35
ZNF34	-0.721791	1.10314	-2.7505	0.0139823	0.0986308	-2.8225	77	71	36	48
ZNF385A	-0.81781	1.88572	-3.84689	0.00136852	0.0200829	-0.869734	146	119	62	78
ZNF467	-1.86638	0.363179	-5.27773	6.91941e-05	0.0021748	0.765567	62	69	21	13
ZNF862	-0.822139	0.213759	-2.46605	0.0250317	0.144268	-3.27416	41	41	22	21

## Sheet: 6h_up
Supplemental Table 5: The RNA transcriptome analysis of AID-KMT2D HUDEP-2 cells with 5-Ph-IAA treatment for 6 hours, 12 hours and 24 hours vs. without 5-Ph-IAA treatment grown in the expansion culture.
gene_name	logFC	AveExpr	t	P.Value	adj.P.Val	B	C25_D6_1	C25_D6_2	C25_I6_1	C25_I6_2
AC002310.12	1.37616	-0.437371	3.4151	0.0034411	0.0388022	-2.04557	14	10	29	30
AC003104.1	0.817199	0.6583	2.7297	0.0145978	0.10216	-2.86062	33	30	56	49
AC018766.6	0.986613	-0.02055	2.65099	0.0171709	0.112817	-3.02308	24	14	34	35
AC027307.3	1.23173	-0.337285	2.98358	0.00859298	0.071743	-2.60435	18	10	25	36
AC073046.25	0.653437	1.37984	2.60294	0.0189499	0.120834	-3.08164	65	47	86	78
AC092295.7	0.626325	1.19925	2.48566	0.024059	0.140893	-3.26176	54	45	67	76
AC144530.1	0.692443	1.92035	3.10683	0.00662567	0.0605727	-2.23589	68	94	102	142
ACOT1	0.699688	0.703154	2.34601	0.0318424	0.165166	-3.45287	34	34	43	62
AF131215.5	1.08936	-0.0746707	2.78072	0.0131324	0.094525	-2.845	24	12	36	33
AL590431.1	0.854428	0.182459	2.50898	0.0229489	0.137161	-3.21282	26	19	36	40
AP001628.6	0.780867	1.20386	3.07224	0.0071283	0.0635761	-2.27995	50	44	67	85
AREG	0.699768	0.961857	2.41163	0.0279287	0.153899	-3.36431	45	37	49	78
ARID5B	0.854504	1.19014	3.12345	0.00639681	0.0592109	-2.19296	49	42	61	96
BOLA2B	3.51918	1.02286	2.26867	0.0371126	0.180945	-3.55894	10	26	37	752
BRICD5	0.683846	0.847581	2.34439	0.0319454	0.165389	-3.4621	31	46	54	60
C1orf51	0.704005	3.09239	5.13566	9.22476e-05	0.00270107	1.59373	195	165	270	278
C22orf23	0.824386	0.486389	2.63717	0.0176656	0.115098	-3.01008	25	31	47	46
CDC42EP2	0.994815	1.04528	3.75776	0.00165534	0.0230651	-1.13087	42	36	69	77
CNTD1	0.825756	0.0925474	2.26937	0.037062	0.180796	-3.55381	17	26	39	32
CTA-221G9.11	0.846924	0.362398	2.53476	0.0217782	0.132596	-3.16846	32	20	41	45
CTB-60B18.10	0.718159	0.44396	2.20693	0.0418909	0.195738	-3.64691	29	27	50	38
CTB-63M22.1	0.788292	2.58198	4.09361	0.000809208	0.0136314	-0.400659	103	146	166	234
CTD-3185P2.1	0.835765	0.0173421	2.2737	0.0367466	0.179398	-3.54856	21	19	26	43
DDR2	1.13791	-0.365705	2.35823	0.0310767	0.163502	-3.45092	7	26	29	28
EGR1	0.627805	5.31883	8.66827	1.59147e-07	2.06272e-05	7.63246	826	907	1131	1377
EIF3CL	0.62733	5.05251	6.18307	1.17553e-05	0.000579136	3.34743	639	812	908	1183
EIF4BP3	0.631407	1.58634	2.47728	0.0244698	0.142164	-3.31247	51	82	80	109
FAM186B	0.659167	0.643521	2.24953	0.0385374	0.185443	-3.59396	34	32	47	51
FLRT1	0.804536	1.23773	2.55238	0.0210109	0.129753	-3.15473	31	73	75	81
GPR85	0.65513	1.72276	2.82235	0.012043	0.0889565	-2.73197	82	60	113	96
GVQW1	0.707111	1.18077	2.77426	0.0133098	0.0954591	-2.78473	43	52	71	74
HDAC10	0.64491	1.05497	2.43894	0.0264375	0.149462	-3.32695	40	49	62	68
HSP90AB3P	0.60009	2.02215	2.76184	0.0136575	0.0972235	-2.87444	102	77	103	152
KB-431C1.5	0.814492	0.714067	2.68019	0.0161694	0.10851	-2.93704	27	40	49	60
KBTBD11	0.650797	0.777878	2.26538	0.0373541	0.181507	-3.57779	39	34	47	61
L3MBTL3	0.590122	3.44731	4.86018	0.000162162	0.0041255	1.03378	250	229	304	372
LAMP3	0.715388	0.357192	2.2348	0.0396679	0.189269	-3.60467	25	28	37	45
LINC00176	0.942773	0.0187437	2.62911	0.0179602	0.116306	-3.05056	23	16	32	38
MORF4L2-AS1	0.846492	0.309021	2.53069	0.0219591	0.133312	-3.17618	23	26	34	50
MSTO2P	0.645388	1.0009	2.35157	0.0314918	0.164389	-3.46063	43	42	69	57
MT-TE	0.618968	1.36073	2.44781	0.0259695	0.148128	-3.337	64	48	68	93
MT-TN	0.69942	4.92454	2.59712	0.0191771	0.121907	-3.93041	680	616	583	1600
MT1X	0.830454	0.496588	2.35685	0.0311621	0.163793	-3.43081	41	19	48	46
MTND4P12	0.725127	3.06862	3.45618	0.00315233	0.0364451	-1.71949	148	210	202	360
NCLP1	1.03164	0.265166	2.88951	0.0104676	0.0810697	-2.64425	19	26	33	55
NDUFV2P1	1.02109	0.0425942	2.9323	0.00957005	0.0769017	-2.60923	20	18	35	38
PCNX	0.651626	1.684	2.94311	0.00935548	0.0758768	-2.515	61	77	100	102
PIGCP1	0.75632	0.424003	2.35953	0.0309965	0.1634	-3.42608	24	31	45	42
RASL11A	0.602321	1.33909	2.36066	0.0309266	0.163376	-3.47626	56	54	63	96
RBFADN	0.709627	0.884017	2.34672	0.0317976	0.165161	-3.46042	34	43	70	50
RN7SK	1.09191	0.334906	2.86771	0.0109557	0.0835984	-2.67043	21	25	31	67
RN7SL1	1.19986	1.35915	4.02007	0.000946157	0.0153349	-0.628019	42	49	70	134
RN7SL2	1.73036	1.03302	6.16555	1.21532e-05	0.000594022	2.45015	26	34	95	92
RNA18S5	1.0215	4.46433	9.16247	7.42748e-08	1.05991e-05	8.42681	354	491	774	810
RNF157	0.601867	1.37145	2.31932	0.0335766	0.170217	-3.54603	60	52	93	69
RP11-10N23.2	0.625218	1.09773	2.3218	0.0334122	0.169936	-3.51464	39	54	67	66
RP11-391M1.4	0.650567	0.939035	2.18482	0.0437363	0.200852	-3.71029	33	50	67	54
RP11-423F24.3	0.856862	0.562538	2.64985	0.0172112	0.112877	-2.98814	25	34	40	61
RP11-458F8.1	0.939612	-0.00213529	2.42198	0.0273548	0.152087	-3.34459	24	15	26	45
RP11-458F8.2	0.849681	0.0332557	2.35537	0.0312544	0.163919	-3.43579	21	19	39	30
RP11-461A8.4	1.0593	0.779421	3.69747	0.00188285	0.0253532	-1.28668	32	31	63	61
RP11-573D15.2	0.857183	-0.329155	2.23139	0.0399335	0.189988	-3.6129	14	17	26	27
RP11-612B6.2	0.850722	-0.113686	2.17388	0.044677	0.203219	-3.68382	25	13	27	35
RP11-649A18.4	0.898263	-0.0136302	2.32476	0.0332161	0.169563	-3.47932	14	26	28	40
RP11-69E11.8	0.852622	0.18211	2.37246	0.0302068	0.161398	-3.40851	17	29	40	36
RPL35P1	1.02256	0.153963	2.64815	0.0172714	0.112974	-3.01294	25	17	28	55
RPL41P1	0.67244	2.22979	3.39214	0.00361381	0.0401301	-1.72829	96	104	122	180
RPS10P3	0.741124	0.559212	2.32335	0.0333094	0.169727	-3.48172	24	38	46	49
RPS14P3	1.05265	0.38655	3.01203	0.00809346	0.0687514	-2.44352	19	30	54	41
SEC14L1P1	1.06682	0.989672	3.93484	0.00113448	0.0174984	-0.849258	39	34	73	71
SH2D2A	0.658412	0.627139	2.17797	0.0443233	0.202158	-3.69748	38	28	45	52
SNORA26	1.05525	-0.228332	2.75116	0.0139633	0.0986087	-2.90563	0	0	0	0
SNORA26	1.05525	-0.228332	2.75116	0.0139633	0.0986087	-2.90563	1	0	0	2
SNORA26	1.05525	-0.228332	2.75116	0.0139633	0.0986087	-2.90563	0	0	0	0
SNORA26	1.05525	-0.228332	2.75116	0.0139633	0.0986087	-2.90563	0	0	0	0
SNORA26	1.05525	-0.228332	2.75116	0.0139633	0.0986087	-2.90563	1	0	0	0
SNORA26	1.05525	-0.228332	2.75116	0.0139633	0.0986087	-2.90563	0	0	0	0
SNORA26	1.05525	-0.228332	2.75116	0.0139633	0.0986087	-2.90563	0	0	0	0
SNORA26	1.05525	-0.228332	2.75116	0.0139633	0.0986087	-2.90563	0	0	0	0
SNORA26	1.05525	-0.228332	2.75116	0.0139633	0.0986087	-2.90563	15	16	25	37
SNORA26	1.05525	-0.228332	2.75116	0.0139633	0.0986087	-2.90563	0	0	0	0
SNORA26	1.05525	-0.228332	2.75116	0.0139633	0.0986087	-2.90563	0	0	0	0
SNORA65	0.995681	0.112555	2.63227	0.0178441	0.115907	-3.03895	24	17	28	51
SNORD100	0.715147	1.70232	2.38095	0.0296986	0.159683	-3.48784	78	60	69	156
SNORD104	0.812521	0.946214	2.94757	0.00926836	0.0754535	-2.49837	44	34	59	69
SNORD12B	1.43668	-0.227785	3.79643	0.00152414	0.0217	-1.45987	14	13	32	38
SNORD78	0.98123	0.445893	2.95658	0.00909467	0.0745283	-2.52147	0	0	0	0
SNORD78	0.98123	0.445893	2.95658	0.00909467	0.0745283	-2.52147	0	0	0	0
SNORD78	0.98123	0.445893	2.95658	0.00909467	0.0745283	-2.52147	22	30	39	58
SNRPEP4	0.634044	1.35882	2.18228	0.043953	0.201357	-3.76064	47	65	58	109
SRSF10	0.800226	5.05514	2.68099	0.0161427	0.10851	-3.80495	386	288	331	275
SRSF10	0.800226	5.05514	2.68099	0.0161427	0.10851	-3.80495	681	689	630	1899
TCEB1P19	0.875477	0.207099	2.5309	0.0219496	0.133312	-3.18001	28	18	36	42
TMEM17	0.682039	0.826898	2.32068	0.0334861	0.170041	-3.49713	34	41	46	68
TRIM62	0.664783	1.10358	2.32511	0.0331935	0.169542	-3.50969	50	41	81	57
TUBA3D	1.06078	-0.278903	2.53871	0.021604	0.132125	-3.20336	10	22	30	29
TUBB2BP1	1.76181	-0.465234	2.71093	0.0151756	0.104786	-3.00552	3	32	24	45
ZNF234	0.616883	2.58271	3.66347	0.0020247	0.0266843	-1.23973	120	141	164	211
ZNF329	0.608124	1.8467	2.82471	0.0119841	0.0887197	-2.74024	92	66	108	115

## Sheet: Hudep2_limmavoom_IAA12hVSDMSO
Supplemental Table 5: The RNA transcriptome analysis of AID-KMT2D HUDEP-2 cells with 5-Ph-IAA treatment for 6 hours, 12 hours and 24 hours vs. without 5-Ph-IAA treatment grown in the expansion culture.
gene_name	logFC	AveExpr	t	P.Value	adj.P.Val	B	C25_D6_1	C25_D6_2	C25_I12_1	C25_I12_2
A3GALT2	0.188777	-0.0629909	0.483464	0.634219	0.782496	-5.68603	18	31	30	23
A4GALT	-0.122264	6.68925	-2.09887	0.0492416	0.14757	-5.66554	2952	2846	2712	2474
AAAS	0.00894412	6.39403	0.162393	0.872688	0.931282	-7.67304	2350	2169	2189	2228
AACS	0.0897642	4.44759	0.972181	0.343017	0.539083	-6.67634	550	589	597	581
AADAT	0.134518	3.47862	1.07726	0.294676	0.490495	-6.25411	301	272	293	318
AAED1	-0.296234	2.97646	-1.84427	0.0805887	0.207817	-5.04982	217	254	161	213
AAGAB	-0.0362801	6.07853	-0.606436	0.55131	0.718671	-7.42546	1888	1800	1643	1856
AAK1	-0.384926	2.57789	-2.2412	0.0369853	0.121463	-4.24354	188	179	122	152
AAMDC	-0.544069	1.0203	-1.98979	0.0610075	0.17113	-4.27828	67	64	42	45
AAMP	0.304027	7.14327	6.15661	6.08417e-06	0.000137352	3.15317	3488	3365	4194	4033
AAR2	-0.000333542	5.74094	-0.00525338	0.995862	0.997756	-7.53349	1433	1447	1421	1379
AARS	0.161618	8.26956	4.28426	0.000390108	0.00418952	-1.25158	7911	7808	8446	8644
AARS2	0.0234314	6.38716	0.422854	0.677087	0.812894	-7.592	2232	2239	2247	2172
AARSD1	0.0075154	2.42962	0.0410045	0.967715	0.982849	-6.49298	130	160	145	137
AASDH	0.00790872	4.54583	0.0873214	0.931318	0.962495	-7.18587	614	641	569	659
AASDHPPT	-0.0479956	6.92078	-0.982018	0.338271	0.534376	-7.29987	3406	3233	2996	3247
AATF	0.0412665	6.9122	0.815122	0.424972	0.616225	-7.44936	3346	3056	3137	3261
ABC7-42389800N19.1	0.0492779	5.09464	0.634532	0.533202	0.705474	-7.14581	861	950	902	917
ABC7-43041300I9.1	-0.509744	0.254014	-1.3794	0.183583	0.357035	-4.99181	31	46	33	20
ABCA11P	-0.742996	0.232015	-2.15716	0.0438335	0.136439	-3.86033	39	42	20	27
ABCA17P	0.440485	4.72815	5.34597	3.53497e-05	0.000599833	1.89869	604	621	789	827
ABCA2	-0.734105	3.71086	-5.57082	2.15327e-05	0.000399241	2.66096	487	425	228	308
ABCA3	-0.21323	6.3562	-3.79281	0.00120623	0.0100619	-2.04299	2381	2369	2035	1950
ABCA7	-0.97298	5.97309	-15.419	2.72532e-12	1.0564e-09	18.3519	2287	2457	1150	1197
ABCB10	-0.211254	8.40274	-5.64327	1.83759e-05	0.000347219	1.8272	9911	9709	7950	8528
ABCB10P1	-0.213087	3.58288	-1.77819	0.0911711	0.225231	-5.35082	355	339	294	288
ABCB10P3	-0.384383	3.93477	-3.43417	0.00273972	0.0188902	-2.19998	496	445	365	336
ABCB10P4	-0.0588057	2.43595	-0.321052	0.75163	0.861696	-6.44267	145	152	120	159
ABCB6	-0.349634	2.47268	-1.84879	0.0799053	0.20636	-4.88818	168	168	150	110
ABCB7	0.0406398	5.70882	0.651236	0.522592	0.697031	-7.30525	1379	1399	1337	1441
ABCB8	-0.11884	6.47549	-2.16381	0.0432521	0.135104	-5.50435	2471	2523	2275	2197
ABCB9	-0.857697	2.00034	-4.13293	0.00055215	0.00553668	-0.178189	147	142	82	73
ABCC1	0.101405	5.60977	1.48817	0.152904	0.317373	-6.39964	1274	1264	1369	1281
ABCC10	0.0126538	5.86634	0.196557	0.846234	0.914842	-7.5453	1566	1561	1587	1483
ABCC4	0.0818307	7.1574	1.74959	0.0961119	0.233393	-6.34704	3855	3623	3806	3884
ABCC5	-0.284339	7.53698	-6.2039	5.50408e-06	0.000126901	3.18991	5397	5649	4203	4616
ABCD1	-0.778392	1.05195	-2.69762	0.0141536	0.0615786	-3.01908	65	81	48	35
ABCD3	0.0623985	5.86432	0.99652	0.331358	0.526877	-7.05723	1506	1566	1472	1648
ABCD4	0.356791	4.55739	3.96564	0.00081098	0.00739662	-1.18995	546	574	714	681
ABCE1	-0.084134	8.5118	-2.21043	0.0393694	0.126841	-5.76837	10179	10070	8862	9718
ABCF1	0.0829813	8.45646	2.07464	0.0516628	0.152614	-6.00754	9379	9010	9575	9358
ABCF2	0.0437911	7.61866	1.05344	0.305181	0.50132	-7.35373	5274	5155	5106	5344
ABCF3	0.0935754	6.27697	1.68633	0.107871	0.252649	-6.26968	2071	1973	2102	2092
ABCG2	-0.876259	2.88398	-5.01683	7.3716e-05	0.00109375	1.61802	311	232	150	135
ABHD10	0.0721812	5.49583	0.915491	0.371259	0.56578	-7.03764	1152	1221	1085	1349
ABHD11	-0.335597	5.15832	-4.51423	0.000230432	0.00274307	-0.100139	1127	1035	819	845
ABHD12	0.0281785	4.91625	0.337739	0.739215	0.852713	-7.24289	808	803	729	872
ABHD13	-0.0516078	4.69233	-0.622621	0.540839	0.711256	-7.03408	719	698	661	668
ABHD14A	0.0503818	2.92274	0.322774	0.750346	0.860832	-6.60032	188	213	214	190
ABHD14B	0.121313	5.75171	1.93956	0.0672282	0.182512	-5.73441	1380	1402	1480	1462
ABHD15	0.142144	2.31548	0.754105	0.459911	0.645608	-6.16903	143	113	132	141
ABHD16A	-0.543414	1.39246	-2.12871	0.0464019	0.141575	-4.12746	75	96	59	54
ABHD16B	0.432833	2.34936	2.27888	0.0342454	0.115242	-4.10999	108	128	166	144
ABHD17A	-0.0474058	7.43143	-0.995898	0.331653	0.527261	-7.38012	4642	4811	4524	4369
ABHD17B	0.239481	4.33697	2.56058	0.0189988	0.0759931	-4.17639	494	507	577	572
ABHD2	-0.220117	6.67814	-4.06674	0.00064285	0.00618612	-1.48216	2935	3021	2328	2648
ABHD3	0.371119	2.82213	2.00464	0.0592707	0.167597	-4.73561	133	210	204	216
ABHD4	-0.168599	3.06125	-1.17687	0.253592	0.44435	-6.00633	238	238	192	220
ABHD5	-0.186507	4.82758	-2.30356	0.0325543	0.111026	-4.82267	800	831	700	693
ABHD6	-0.0389931	1.837	-0.175911	0.862201	0.924339	-6.28785	101	93	103	82
ABHD8	0.0905344	2.11188	0.455855	0.653594	0.795846	-6.28508	120	105	122	111
ABI1	0.0039706	5.60369	0.0598918	0.952859	0.974704	-7.49522	1271	1345	1279	1270
ABI2	-0.180254	6.02748	-3.11037	0.0056951	0.0322566	-3.49323	1847	1893	1593	1615
ABL1	-0.113545	7.04471	-2.21781	0.0387851	0.125742	-5.5176	3735	3661	3419	3231
ABL2	-0.0732449	5.10027	-0.862561	0.398996	0.592571	-6.97348	880	1021	818	935
ABO	-0.578505	-0.111907	-1.53664	0.140654	0.300898	-4.7255	28	32	22	17
ABR	-0.24043	6.42607	-4.37876	0.000314137	0.00351041	-0.714722	2566	2468	2102	2041
ABRACL	0.16984	4.32121	1.78205	0.0905203	0.224159	-5.58254	509	505	569	541
ABT1	0.172395	6.71021	3.50782	0.00231638	0.0167048	-2.75991	2674	2639	2865	2955
ABTB1	-0.526409	0.461675	-1.59956	0.125979	0.279672	-4.74969	46	42	35	25
ABTB2	-0.000464653	1.6294	-0.00195058	0.998464	0.999038	-6.24034	74	93	71	91
AC000089.3	0.263971	0.965006	0.922448	0.367711	0.562257	-5.63765	45	50	63	49
AC000120.7	-0.224678	0.042164	-0.630355	0.535873	0.70735	-5.63194	31	28	26	23
AC000123.4	-0.100184	0.828337	-0.346463	0.732753	0.847688	-5.95626	50	48	47	42
AC002116.7	0.423657	0.226835	1.23241	0.232635	0.418027	-5.15747	31	23	35	35
AC002310.12	1.39714	-0.425635	3.32314	0.00352556	0.0227174	-1.72757	14	10	36	27
AC002467.7	0.296084	1.1624	1.07449	0.295885	0.491319	-5.54471	66	44	62	67
AC003104.1	0.578796	0.537112	1.84257	0.080846	0.208208	-4.41384	33	30	48	44
AC003665.1	-0.461532	0.656798	-1.49762	0.150448	0.314222	-4.92753	53	46	30	40
AC004057.1	-0.0218568	5.30976	-0.231314	0.819511	0.900932	-7.3877	1060	1090	1161	916
AC004074.3	-0.015633	1.57293	-0.0664139	0.947733	0.972508	-6.22125	89	72	76	78
AC004158.2	-0.194252	0.381195	-0.593693	0.559629	0.725657	-5.73166	37	37	34	29
AC004257.3	0.0117814	0.709504	0.0394656	0.968926	0.983354	-5.98412	47	40	42	43
AC004381.6	-0.132455	5.25884	-1.82964	0.0828346	0.211391	-5.78386	1082	1076	978	937
AC004447.2	0.217907	3.66779	1.83826	0.081504	0.209243	-5.28273	301	334	344	373
AC004453.8	-0.132563	0.413187	-0.398845	0.694396	0.825911	-5.83264	32	43	29	37
AC004463.6	-0.118417	1.01919	-0.423681	0.676494	0.812632	-5.97726	59	54	43	59
AC004797.1	0.234642	3.7262	2.0391	0.0554081	0.160168	-4.96259	316	341	361	390
AC004840.9	-0.459861	1.77231	-1.9906	0.0609119	0.170902	-4.45535	94	123	69	83
AC004893.11	-0.385458	1.2806	-1.46038	0.160314	0.327417	-5.12348	85	65	49	62
AC004951.5	0.0903254	0.198541	0.26511	0.793742	0.886829	-5.82442	28	31	30	31
AC004967.7	-0.181942	2.67433	-1.04141	0.310586	0.506909	-6.0277	198	168	174	141
AC004980.7	0.162912	1.91655	0.697609	0.493761	0.674033	-6.08342	100	91	128	85
AC005003.1	-0.329909	0.339218	-0.942085	0.357821	0.553004	-5.46904	31	46	24	35
AC005104.3	0.0817101	0.48111	0.244761	0.809231	0.895294	-5.89783	35	37	46	30
AC005154.6	0.0639958	3.83283	0.585438	0.565053	0.730552	-6.78134	370	380	372	390
AC005229.1	0.121432	0.006243	0.316467	0.755054	0.863356	-5.76529	19	34	29	25
AC005253.2	-0.130763	1.5629	-0.55889	0.58268	0.7444	-6.06345	89	77	70	77
AC005306.3	-0.115281	0.0420765	-0.27918	0.783084	0.880712	-5.78396	38	21	36	18
AC005307.3	-0.0181146	2.00492	-0.0887877	0.930168	0.961986	-6.35242	116	101	106	102
AC005519.4	0.304121	0.262599	0.877409	0.391082	0.585302	-5.50722	24	34	37	32
AC005682.5	0.0794849	3.2393	0.526191	0.604765	0.760871	-6.61725	289	211	241	267
AC005682.6	0.943927	-0.03557	2.56282	0.0189083	0.0758135	-3.13113	17	20	37	33
AC005785.2	0.0404196	1.19968	0.15643	0.877323	0.933407	-6.10396	61	60	61	60
AC005841.1	0.0118495	0.127973	0.03045	0.976022	0.986761	-5.84124	33	25	40	20
AC005943.4	-0.455301	0.0250446	-1.17311	0.255062	0.44617	-5.17856	40	25	17	29
AC005943.5	0.0654095	1.43492	0.254365	0.801911	0.89106	-6.1505	86	58	74	70
AC006042.6	0.143265	1.4048	0.545746	0.591509	0.751364	-6.02538	84	54	68	77
AC006116.13	-0.526913	-0.0637425	-1.43097	0.168471	0.337541	-4.86757	29	32	18	23
AC006116.20	-0.75147	0.149927	-2.11943	0.0472686	0.14331	-3.91017	43	34	24	20
AC006486.1	0.201198	0.0468949	0.567566	0.576889	0.73984	-5.66894	24	27	28	29
AC006538.1	0.946604	2.80717	5.80098	1.30405e-05	0.000258808	3.32162	123	149	243	265
AC006547.13	-0.275197	2.82803	-1.7348	0.0987578	0.23809	-5.17725	195	226	169	168
AC006946.16	-0.105329	1.96924	-0.513556	0.613406	0.767412	-6.21114	106	112	92	105
AC006978.6	0.389026	2.12804	1.83701	0.0816953	0.209498	-4.80621	88	119	142	120
AC007038.7	-0.346593	0.19831	-0.967983	0.345056	0.541064	-5.41474	37	32	20	34
AC007318.5	0.066703	4.74461	0.812875	0.426228	0.61723	-6.9111	728	683	701	735
AC007383.3	0.0807547	0.93561	0.279194	0.783073	0.880712	-6.00551	56	44	44	59
AC007405.6	-0.509107	1.12102	-1.76735	0.0930176	0.228473	-4.6496	62	78	37	60
AC007405.8	-0.242446	0.186464	-0.621105	0.541815	0.712313	-5.66997	45	24	20	36
AC007620.3	0.218385	3.32432	1.31523	0.203882	0.382943	-5.92771	272	230	225	353
AC007969.5	0.311954	4.06285	1.92531	0.0690919	0.186227	-5.26417	388	422	368	641
AC008132.12	-0.324917	0.959111	-1.14756	0.26521	0.458234	-5.4163	52	65	43	47
AC008982.2	0.317303	1.53926	1.26175	0.22211	0.40629	-5.44069	76	64	69	103
AC009005.2	-1.29143	1.37683	-4.49156	0.000242679	0.0028614	0.646946	91	131	34	54
AC009120.6	0.206551	0.817635	0.65135	0.52252	0.697031	-5.80494	50	38	62	39
AC009133.12	0.678037	0.287021	2.02431	0.0570364	0.163202	-4.08598	26	25	37	43
AC009133.14	-0.2834	1.17291	-1.05924	0.302601	0.498656	-5.5622	59	75	52	54
AC009245.3	0.0383499	2.61713	0.22426	0.824918	0.904157	-6.52849	154	172	146	180
AC009403.2	0.423309	2.39881	2.26672	0.0351087	0.117067	-4.14651	116	129	140	181
AC009404.2	-0.19227	2.5972	-1.08509	0.291282	0.486412	-5.95795	174	173	167	131
AC009506.1	-0.702222	0.426757	-2.07877	0.0512425	0.151806	-4.01985	52	40	32	23
AC009948.5	-0.238743	3.47645	-1.85515	0.0789536	0.204817	-5.19215	330	321	241	297
AC010525.6	-0.151338	0.529254	-0.482606	0.634817	0.782731	-5.8252	40	41	32	39
AC010536.1	-0.0674863	2.04391	-0.334887	0.741331	0.854144	-6.31161	106	121	101	109
AC010642.1	-0.0900527	1.16725	-0.343948	0.734614	0.849142	-6.04792	59	65	55	58
AC010761.8	0.178511	2.92944	1.15043	0.264058	0.457067	-5.99386	210	176	220	204
AC010976.2	-0.189315	0.112063	-0.515951	0.611763	0.766109	-5.70992	24	39	25	27
AC011043.1	0.248813	2.12513	1.27011	0.219181	0.402237	-5.60246	101	114	124	124
AC011747.4	0.185923	0.402373	0.551115	0.587894	0.748327	-5.76047	27	40	39	34
AC012146.7	0.447017	1.48266	1.87651	0.0758273	0.198976	-4.56863	65	63	81	89
AC012314.8	0.325254	0.541457	0.933326	0.36221	0.557287	-5.52405	26	46	34	52
AC013394.2	-0.165254	4.32528	-1.59753	0.126431	0.280394	-5.86653	558	584	535	459
AC013474.4	-0.783146	0.00274129	-2.09464	0.0496567	0.148452	-3.92911	29	42	20	19
AC015849.19	0.217395	1.95289	0.99994	0.329742	0.52554	-5.84268	88	105	121	98
AC016292.3	-0.724629	-0.0250172	-1.79858	0.0877824	0.21997	-4.37845	29	39	13	29
AC016629.3	-0.803366	2.88039	-4.44779	0.000268225	0.00311815	0.356094	257	265	180	118
AC016629.8	-0.165957	1.98689	-0.803246	0.431638	0.622209	-6.02623	104	122	94	101
AC016734.2	0.364802	2.97816	2.42822	0.0251314	0.0923402	-4.01322	182	191	245	223
AC016739.2	0.27474	2.37743	1.46032	0.16033	0.327417	-5.43774	132	122	129	172
AC016747.3	-0.14601	2.37757	-0.811365	0.427073	0.617919	-6.14355	155	139	122	136
AC016757.3	-0.0543411	3.00491	-0.3436	0.734871	0.849202	-6.62017	253	191	196	216
AC016773.1	-0.348955	2.06832	-1.55013	0.137393	0.296128	-5.21841	104	155	103	91
AC018638.1	0.634338	-0.17038	1.60489	0.124796	0.277961	-4.62634	14	25	27	30
AC018720.10	-0.285227	-0.10619	-0.63081	0.535582	0.707141	-5.5985	17	43	29	16
AC018755.1	0.337028	0.6754	1.10972	0.280789	0.475198	-5.38804	34	42	45	48
AC018766.4	-0.550351	0.0982726	-1.41856	0.172014	0.342262	-4.9129	27	44	17	30
AC018766.5	-0.0569744	1.78403	-0.253285	0.802733	0.891494	-6.2546	108	82	84	92
AC018804.1	-0.0878145	-0.0728547	-0.219401	0.828647	0.905997	-5.77197	29	23	33	17
AC018804.7	0.475067	0.0832645	1.24263	0.228927	0.413997	-5.11638	33	17	28	37
AC019097.7	0.083028	0.297279	0.231813	0.81913	0.900672	-5.85597	27	37	41	26
AC022007.5	0.433056	1.00325	1.57693	0.131101	0.286955	-4.89956	48	44	61	60
AC022400.1	-0.892539	-0.146187	-2.3085	0.0322254	0.11036	-3.55898	38	28	19	15
AC022431.1	0.0885226	3.27777	0.669944	0.510849	0.686878	-6.54251	260	246	251	272
AC024560.3	0.0133875	4.05713	0.110884	0.912856	0.952411	-7.02611	392	507	448	427
AC024937.6	0.463491	0.661142	1.39998	0.177428	0.348459	-5.05403	29	44	58	40
AC025171.1	0.119468	1.98987	0.541899	0.594105	0.753505	-6.20291	124	84	110	106
AC025335.1	-0.385992	3.90412	-3.54859	0.00211048	0.0156009	-1.9371	451	470	347	338
AC026271.5	0.386695	2.50601	2.21787	0.0387807	0.125742	-4.26662	129	138	156	184
AC026740.1	-0.00732085	1.1264	-0.0267712	0.978918	0.988481	-6.09552	55	62	64	50
AC026806.2	0.0855511	2.2683	0.433753	0.669289	0.806868	-6.34548	119	132	146	115
AC027601.1	-0.506195	0.671294	-1.64695	0.115794	0.265001	-4.72694	45	57	33	36
AC027612.1	-0.349209	0.327061	-1.02275	0.319104	0.51569	-5.39303	43	33	24	34
AC027612.6	-0.0565962	2.42743	-0.301885	0.765977	0.870071	-6.44609	137	158	153	124
AC027763.2	-0.167867	1.54892	-0.703152	0.490377	0.670707	-5.96907	92	75	66	78
AC046143.3	-0.546335	0.491637	-1.61692	0.122163	0.274314	-4.73153	36	57	28	32
AC069282.6	-0.121816	1.22003	-0.472347	0.641989	0.787854	-6.01034	68	62	59	57
AC069547.1	4.86205e-05	-0.016005	0.00011996	0.999906	0.999906	-5.80815	20	34	34	19
AC073046.25	0.291057	1.19541	1.08154	0.29282	0.488319	-5.54622	65	47	61	71
AC073850.6	-0.502949	1.94874	-2.00882	0.0587888	0.166721	-4.47108	157	97	69	103
AC074117.10	0.248278	3.43888	1.93624	0.0676577	0.183357	-5.04673	282	254	289	330
AC074286.1	-0.522128	0.0767153	-1.32425	0.200928	0.379232	-5.02168	43	26	30	17
AC074389.9	-0.104085	3.46735	-0.788952	0.439748	0.629854	-6.51733	342	278	270	288
AC079250.1	0.0526121	0.717988	0.164464	0.87108	0.930132	-5.97374	56	33	40	47
AC079466.1	-0.112811	8.97965	-3.26539	0.0040177	0.0250934	-3.66245	14108	14173	12592	12829
AC079807.2	-0.281163	1.60707	-1.20972	0.241032	0.427984	-5.51914	86	94	76	68
AC083799.1	0.251501	2.48303	1.21764	0.238076	0.424906	-5.77555	132	144	123	205
AC083843.1	-0.224501	3.62785	-1.91766	0.0701112	0.188075	-5.13767	365	354	292	306
AC083899.3	0.158133	2.3222	0.794658	0.436499	0.62703	-6.13983	115	140	156	122
AC084018.1	-0.426681	3.83226	-3.48112	0.00246182	0.0174894	-2.06496	406	486	334	309
AC084125.4	0.156695	0.905164	0.53211	0.600737	0.75889	-5.8964	40	56	46	57
AC087294.2	0.379837	-0.0930999	1.00988	0.325075	0.522377	-5.31564	18	26	28	27
AC090587.2	-0.19466	1.4827	-0.788274	0.440135	0.630006	-5.88768	77	83	77	60
AC090616.2	-1.4069	-0.549493	-3.34437	0.00335987	0.0219693	-1.69516	28	31	11	10
AC091729.9	-0.0324204	1.73036	-0.146799	0.884817	0.937897	-6.25986	94	86	81	90
AC092171.4	-0.0587732	3.46892	-0.459725	0.650863	0.793679	-6.72733	289	320	265	303
AC092295.7	0.371634	1.07387	1.34728	0.193534	0.370234	-5.21636	54	45	68	57
AC092301.3	0.482957	-0.102063	1.14198	0.267465	0.46091	-5.18576	13	33	25	32
AC092811.1	-0.590773	1.05225	-2.11776	0.0474257	0.14369	-4.07192	76	61	39	49
AC093323.3	-0.176897	4.32145	-1.78703	0.0896889	0.223036	-5.57378	616	531	492	492
AC093616.4	-0.15893	3.11284	-1.11579	0.278247	0.472273	-6.09126	260	232	218	210
AC093627.9	-0.272403	0.442865	-0.780537	0.444566	0.633883	-5.62367	51	31	26	39
AC093642.5	-0.14053	0.311952	-0.407013	0.688488	0.821524	-5.80504	40	30	25	37
AC093838.4	-0.206688	4.8954	-2.5756	0.0183998	0.0743425	-4.31234	901	822	719	731
AC104135.3	-0.352435	4.06164	-3.43602	0.00272819	0.0188421	-2.23426	526	490	382	391
AC108463.1	0.170504	0.183934	0.473657	0.641071	0.78764	-5.74691	31	26	24	40
AC108463.2	-0.199201	1.24676	-0.781904	0.443782	0.633138	-5.82687	68	68	56	59
AC108488.4	0.0195345	0.579526	0.0566363	0.955419	0.976195	-5.95018	50	31	49	31
AC109309.4	-3.8031	-0.34953	-8.39037	7.41442e-08	3.64954e-06	5.94687	77	80	5	5
AC110781.3	0.114381	2.00793	0.553884	0.586034	0.746551	-6.20203	112	96	99	120
AC113189.5	-0.102993	3.55701	-0.847932	0.406894	0.599933	-6.49859	323	333	303	291
AC118138.2	0.756063	0.353722	2.29258	0.0332973	0.112878	-3.65075	25	27	44	42
AC118278.1	0.403779	-0.0806616	1.08093	0.293083	0.488577	-5.25119	26	18	27	29
AC125232.1	-0.207729	3.00712	-1.39618	0.178553	0.349774	-5.71972	220	245	201	190
AC129492.6	0.713937	0.556621	2.18562	0.0413942	0.13105	-3.86482	25	37	53	45
AC132216.1	-0.531976	0.930553	-1.87126	0.0765849	0.200437	-4.44818	56	67	40	42
AC133528.2	-0.0029392	1.75372	-0.0133338	0.989499	0.994857	-6.2779	90	91	80	96
AC137932.1	0.432158	1.12064	1.49383	0.151429	0.315633	-5.04015	41	61	55	78
AC137932.5	-0.0388429	1.22585	-0.140871	0.889435	0.940381	-6.11348	58	69	72	50
AC138035.2	0.15033	0.333302	0.44571	0.660778	0.800967	-5.79453	28	36	30	39
AC138123.2	0.146986	0.549793	0.471254	0.642755	0.788146	-5.83586	37	37	36	44
AC139100.2	0.163776	-0.0990884	0.421321	0.678187	0.813798	-5.70461	18	30	28	23
AC141586.5	0.00209809	2.39197	0.0116208	0.990848	0.995295	-6.48152	147	135	125	150
AC144521.1	-0.106027	0.661831	-0.347235	0.732182	0.8472	-5.91319	49	39	37	42
AC144530.1	-0.0536981	1.54833	-0.20364	0.840772	0.912311	-6.19514	68	94	59	94
AC144652.1	0.096747	1.12315	0.359744	0.722955	0.842195	-6.03052	51	62	60	57
AC147651.4	-0.430185	2.50172	-2.46626	0.0232016	0.0875075	-3.80011	180	173	134	121
AC156455.1	0.119957	2.06194	0.603607	0.553151	0.720042	-6.19022	113	102	114	113
AC159540.1	-0.0321292	4.05295	-0.277278	0.784522	0.88177	-6.99095	488	417	464	398
ACAA1	-0.0366784	5.02465	-0.476523	0.639066	0.786328	-7.21593	860	916	836	846
ACAA2	-0.346283	5.86886	-5.40715	3.08727e-05	0.00053709	1.75082	1750	1798	1397	1318
ACACA	0.113371	6.69118	2.22012	0.0386043	0.125353	-5.44508	2744	2610	2697	2934
ACACB	-0.837492	2.52419	-4.44913	0.000267405	0.00311153	0.430502	187	229	98	128
ACAD10	-0.109917	4.21193	-1.04756	0.307814	0.503711	-6.52494	562	477	479	455
ACAD8	-0.064312	4.99056	-0.823124	0.420516	0.612007	-6.97539	891	859	832	796
ACAD9	-0.0914423	6.00735	-1.46502	0.159055	0.32578	-6.53197	1725	1853	1653	1610
ACADM	-0.0244586	6.60867	-0.419804	0.679276	0.814317	-7.63968	2755	2552	2347	2732
ACADS	-0.0256274	4.35179	-0.271872	0.788615	0.884173	-7.08954	540	569	536	523
ACADSB	-0.0264402	5.37677	-0.388894	0.701622	0.830352	-7.35551	1123	1135	1070	1085
ACADVL	-0.151485	7.5938	-3.61713	0.00180432	0.0136469	-2.67378	5543	5425	4736	4862
ACAP1	-1.82423	0.484921	-5.33886	3.59114e-05	0.000607701	2.2374	62	80	20	18
ACAP2	-0.19894	6.3863	-3.60463	0.0018567	0.0139748	-2.47585	2349	2481	1975	2114
ACAP3	-0.436245	5.85071	-6.49738	2.97497e-06	7.49218e-05	4.1404	1717	1903	1306	1291
ACAT1	0.0064402	6.95437	0.137491	0.89207	0.942204	-7.79063	3363	3303	3172	3337
ACAT2	0.418125	6.92911	8.40117	7.26986e-08	3.59264e-06	7.74231	2947	2735	3670	3706
ACBD3	0.180627	5.46345	2.73274	0.0131155	0.0584008	-4.15184	1110	1122	1205	1254
ACBD4	-0.159277	2.49308	-0.919261	0.369334	0.563842	-6.08781	152	168	135	143
ACBD5	0.229168	4.69604	2.54965	0.0194462	0.0772865	-4.30666	659	631	668	806
ACBD6	0.13837	5.76146	2.27129	0.034782	0.116573	-5.1422	1401	1384	1447	1533
ACBD7	-0.0383719	1.27656	-0.137616	0.891973	0.942204	-6.12818	67	64	79	49
ACCS	-0.22945	3.20347	-1.6193	0.121648	0.27395	-5.47147	263	273	239	207
ACD	0.0516504	5.35314	0.671025	0.510176	0.686283	-7.19472	1141	1023	1134	1047
ACER2	0.125267	2.35609	0.591411	0.561126	0.727142	-6.29182	168	103	128	152
ACER3	-0.0633319	4.12277	-0.629685	0.536303	0.707616	-6.84873	468	491	426	466
ACHE	-1.30885	3.5295	-9.65637	8.13915e-09	6.11867e-07	10.4973	510	468	209	176
ACIN1	0.160599	8.07343	2.69073	0.0143661	0.0622399	-4.76421	6982	6740	8045	6915
ACLY	0.0186634	8.86248	0.539729	0.595572	0.754594	-7.95268	12531	12383	12078	12454
ACN9	0.184043	4.99026	2.21422	0.0390687	0.126134	-5.03745	748	862	866	907
ACO1	0.0655419	6.69905	1.25572	0.224244	0.408447	-6.95456	2786	2687	2630	2942
ACO2	0.0248431	7.45257	0.508507	0.616875	0.770023	-7.75701	4704	4649	4770	4487
ACOT1	0.566379	0.637935	1.78848	0.0894467	0.222791	-4.51503	34	34	40	60
ACOT13	0.0112559	5.01152	0.13494	0.89406	0.943181	-7.32102	820	912	875	821
ACOT2	-0.00987714	5.02634	-0.131916	0.89642	0.944626	-7.32569	874	887	829	871
ACOT7	-0.0416041	5.8208	-0.649917	0.523426	0.697601	-7.33477	1594	1495	1489	1429
ACOT8	-0.21459	3.84855	-1.75429	0.0952848	0.232066	-5.47435	417	417	389	315
ACOT9	-0.0826826	4.99494	-0.965118	0.346453	0.54243	-6.84888	966	808	777	846
ACOX1	-0.279897	5.68935	-4.07539	0.000630194	0.00610698	-1.24393	1492	1573	1135	1322
ACOX3	-0.00567169	3.58549	-0.0421147	0.966841	0.982444	-6.87506	365	287	284	345
ACP1	-0.0407967	7.0709	-0.791786	0.438132	0.628495	-7.49858	3702	3646	3228	3728
ACP2	0.199609	4.35099	2.00881	0.0587905	0.166721	-5.21363	475	553	569	575
ACP6	0.425101	0.602424	1.28899	0.212674	0.393673	-5.17476	32	38	35	59
ACPP	-0.0887748	4.01313	-0.860829	0.399926	0.593454	-6.63821	455	441	409	410
ACPT	0.0723554	0.337098	0.208642	0.83692	0.910467	-5.87055	38	28	40	28
ACRC	-0.120329	0.597036	-0.368469	0.716544	0.838887	-5.88941	45	39	47	30
ACSBG1	-0.541214	5.72422	-8.64663	4.66501e-08	2.57177e-06	8.42569	1752	1683	1138	1156
ACSF2	-0.836174	-0.289332	-2.09395	0.0497247	0.148551	-3.89232	29	29	12	20
ACSF3	-0.15915	4.48308	-1.75546	0.0950792	0.231786	-5.67473	651	622	519	590
ACSL1	-0.130497	4.3241	-1.3044	0.207477	0.387196	-6.26661	567	562	451	555
ACSL3	0.201277	6.39216	3.41638	0.00285287	0.0194434	-2.89999	2216	2009	2222	2500
ACSL4	-0.0466056	6.87145	-0.891409	0.383715	0.578496	-7.37549	3275	3138	2825	3218
ACSL5	-0.775264	2.154	-3.81937	0.00113487	0.00960228	-0.887432	147	166	97	81
ACSM3	-0.391794	3.41423	-2.93897	0.00834269	0.0423762	-3.11371	306	353	228	259
ACSS1	-0.727608	6.01773	-12.3413	1.35828e-10	2.44175e-08	14.3616	2255	2235	1326	1310
ACSS2	-0.621337	5.05701	-7.20412	7.08616e-07	2.39501e-05	5.79066	1136	1086	760	650
ACTB	-0.194269	11.8586	-6.94105	1.19931e-06	3.64523e-05	4.15661	106367	107615	92131	89694
ACTG1	-0.0472889	9.95537	-1.38251	0.182644	0.35587	-7.297	27178	27186	25977	25175
ACTG1P3	-0.130785	0.180627	-0.380001	0.708104	0.834768	-5.78423	33	30	25	31
ACTL10	-0.313173	1.00215	-1.00542	0.327162	0.523544	-5.57041	58	61	64	34
ACTL6A	0.17005	7.10167	3.67785	0.00157011	0.0122636	-2.45052	3527	3448	3799	3829
ACTL8	0.0687799	3.43237	0.550284	0.588453	0.748722	-6.66849	280	287	283	295
ACTN1	0.10342	3.6603	0.872502	0.393686	0.58773	-6.51216	316	341	323	363
ACTN2	-0.112393	2.90928	-0.681522	0.503658	0.681655	-6.41171	230	191	210	170
ACTN4	-0.328522	8.6323	-9.08979	2.13493e-08	1.34425e-06	8.75821	12057	11898	9203	9339
ACTR10	-0.0684995	5.14998	-0.930425	0.363672	0.558566	-6.92661	1008	951	868	948
ACTR1A	0.176152	6.68398	3.15776	0.0051206	0.0299361	-3.53028	2629	2580	2962	2765
ACTR1B	-0.102747	5.44176	-1.50392	0.148829	0.312047	-6.33147	1206	1219	1113	1083
ACTR2	-0.00507322	8.82736	-0.126594	0.900575	0.946925	-8.09137	12368	12153	11134	12653
ACTR3	-0.0338808	8.01771	-0.805891	0.430148	0.620918	-7.64851	6975	7155	6380	7045
ACTR3B	0.254004	4.10336	2.54655	0.0195752	0.0775009	-4.13187	427	420	483	499
ACTR3C	-0.6813	1.14042	-2.50057	0.0215807	0.0830296	-3.40729	81	69	39	52
ACTR5	0.0852927	4.82178	0.999129	0.330125	0.525725	-6.76482	790	691	770	755
ACTR6	0.169426	4.6285	1.89752	0.0728595	0.193068	-5.48904	671	587	688	685
ACTR8	0.0177016	4.93803	0.227748	0.822243	0.902416	-7.2817	809	832	774	841
ACTRT3	0.069659	0.111648	0.188461	0.852487	0.91934	-5.82073	37	21	28	29
ACVR1B	0.113061	5.00429	1.49421	0.151331	0.3156	-6.2221	819	843	855	892
ACVR2A	0.287065	2.02016	1.40832	0.17498	0.345613	-5.39768	104	93	122	112
ACVR2B	-0.011591	3.38942	-0.0868108	0.931718	0.962685	-6.80629	297	269	290	257
ACY1	0.286243	2.26506	1.53004	0.142272	0.302804	-5.30758	110	124	134	143
ACYP1	0.240692	2.66378	1.47119	0.157397	0.323612	-5.51157	160	153	185	175
ACYP2	-0.249637	0.980854	-0.871883	0.394016	0.587925	-5.68448	50	66	50	44
AD000090.2	0.178161	4.84185	2.00425	0.0593158	0.167597	-5.37065	760	692	845	755
AD000092.3	-0.165666	-0.118716	-0.426491	0.674481	0.811235	-5.69782	23	29	17	29
AD000684.2	1.02348	-0.15155	2.58497	0.0180353	0.0732515	-3.08174	13	21	28	39
ADAL	0.0100359	3.99198	0.0953319	0.925037	0.959217	-7.00629	442	412	396	440
ADAM10	-0.0612623	6.09467	-1.04066	0.310928	0.507201	-7.06748	1953	1810	1679	1826
ADAM15	-0.214964	6.42034	-3.93142	0.000877328	0.00784598	-1.74014	2532	2438	2108	2055
ADAM17	0.0491876	5.00932	0.509895	0.61592	0.769552	-7.19462	789	923	759	966
ADAM1A	-0.151586	2.41477	-0.806674	0.429707	0.620531	-6.15912	161	141	148	118
ADAM22	-0.0296882	3.86667	-0.256963	0.799933	0.890058	-6.93525	365	431	369	386
ADAM32	-0.619762	1.3281	-2.31612	0.0317231	0.109122	-3.78256	84	83	41	67
ADAM8	-1.10792	2.17443	-5.27639	4.12551e-05	0.000683216	2.27352	169	187	93	69
ADAM9	-0.0965483	5.72293	-1.54819	0.137858	0.296719	-6.34378	1446	1496	1309	1365
ADAMTS19	0.439118	1.98238	2.15371	0.0441379	0.13718	-4.23342	95	87	117	123
ADAMTS3	-0.201541	5.18644	-2.67837	0.0147552	0.0634836	-4.1867	1070	1034	826	955
ADAMTS6	-0.0842879	0.291615	-0.242778	0.810745	0.89614	-5.85192	40	28	26	36
ADAMTSL4	-1.35672	3.94685	-12.1679	1.73168e-10	2.90267e-08	14.264	665	664	240	264
ADAMTSL5	-0.4214	4.04673	-3.31189	0.00361652	0.0231712	-2.50161	451	587	393	355
ADAR	-0.0589301	8.32371	-1.57412	0.131749	0.287917	-6.80479	8888	8729	8121	8317
ADARB1	0.0245473	5.4055	0.346387	0.732809	0.847688	-7.3799	1160	1103	1148	1091
ADAT1	-0.141071	4.2652	-1.48853	0.152808	0.317333	-6.004	539	548	468	490
ADAT2	-0.363722	6.58484	-7.00544	1.05347e-06	3.27499e-05	5.05321	2977	2890	2115	2319
ADAT3	0.0108634	2.94167	0.0637146	0.949854	0.973477	-6.65821	223	189	234	174
ADCK1	-0.109715	4.29661	-0.998673	0.33034	0.525932	-6.60182	516	584	539	455
ADCK2	-0.0271627	3.74761	-0.221581	0.826974	0.905098	-6.90441	375	354	379	320
ADCK3	-0.0209698	6.35292	-0.351007	0.729395	0.845845	-7.61354	2190	2247	1964	2295
ADCK4	-0.313069	4.87891	-3.79732	0.00119379	0.00998502	-1.66182	884	881	718	665
ADCK5	-0.336802	3.88452	-2.66033	0.0153409	0.0652585	-3.83338	440	452	392	302
ADCY10P1	0.249348	2.33521	1.28073	0.215503	0.397916	-5.65461	125	123	164	126
ADCY3	-0.48114	5.26748	-6.06817	7.34336e-06	0.000158965	3.357	1232	1217	911	800
ADCY7	-0.104438	7.04705	-1.93263	0.0681293	0.184193	-6.02551	3571	3818	3429	3252
ADD1	-0.244351	7.74875	-5.78535	1.34895e-05	0.000264754	2.23857	6370	6240	5196	5152
ADD2	-0.18672	8.93351	-5.41964	3.00324e-05	0.000525419	1.25435	14204	13899	11849	12150
ADD3	-0.31617	3.65383	-2.54496	0.0196414	0.0776639	-3.99276	373	382	319	273
ADH5	0.189013	6.96209	4.00676	0.000737859	0.00686087	-1.67463	3161	3130	3366	3607
ADI1	0.0382001	6.98305	0.813976	0.425612	0.616667	-7.46402	3342	3383	3309	3403
ADIPOR1	0.0710683	6.50175	1.34192	0.195235	0.372453	-6.80621	2454	2310	2419	2444
ADIPOR2	-0.0435539	7.38733	-0.982705	0.337941	0.534059	-7.38535	4641	4515	4315	4320
ADIRF-AS1	-0.159442	3.43456	-1.1064	0.282189	0.476746	-6.20756	335	281	300	239
ADK	0.160494	6.14624	2.86596	0.00980104	0.0476753	-4.04391	1785	1824	1905	2016
ADM2	0.194343	1.31989	0.696985	0.494143	0.674133	-5.90872	48	81	73	66
ADM5	0.162692	2.52458	0.846568	0.407636	0.60037	-6.16196	155	138	129	195
ADNP	0.0517118	7.23585	1.14525	0.266145	0.459233	-7.18668	3994	3981	4005	4030
ADNP2	-0.0579625	6.3163	-1.07598	0.295237	0.490901	-7.07993	2197	2183	1969	2122
ADO	0.116883	4.89057	1.30975	0.205694	0.385179	-6.43446	848	693	799	818
ADORA2B	-0.13216	4.48361	-1.43626	0.166979	0.335472	-6.14495	654	607	575	544
ADPGK	0.180323	6.07408	3.19436	0.00471589	0.0282726	-3.32172	1699	1710	1836	1919
ADPRHL2	-0.00853405	5.20347	-0.109665	0.91381	0.952672	-7.37941	1041	950	997	928
ADPRM	-0.0985668	2.76375	-0.566029	0.577912	0.74054	-6.43741	189	188	199	148
ADRBK1	-0.105234	6.92671	-2.23382	0.0375448	0.122641	-5.46556	3420	3377	3026	3116
ADRBK2	0.0227834	5.74814	0.350959	0.72943	0.845845	-7.47097	1398	1476	1341	1498
ADRM1	0.24692	6.96232	4.39068	0.000305677	0.00343133	-0.792317	3161	3005	3712	3409
ADSL	0.00316592	7.80311	0.0741933	0.941622	0.968953	-7.94773	5900	6120	5843	5864
ADSS	0.137786	6.39638	2.36898	0.0284367	0.100953	-5.10305	2102	2227	2172	2461
AEBP2	0.225714	5.44085	3.33227	0.0034533	0.022368	-2.85979	1056	1108	1198	1261
AEN	-0.145458	6.51722	-2.75034	0.012623	0.0567417	-4.36439	2684	2508	2219	2342
AES	0.133503	7.01868	2.74006	0.0129084	0.0577528	-4.48462	3468	3206	3483	3629
AF129075.5	-0.136211	0.558027	-0.411204	0.685464	0.819044	-5.86338	48	35	44	30
AF131215.2	0.214119	3.53212	1.64802	0.115572	0.264671	-5.5364	267	313	300	353
AF131215.9	0.423125	2.29936	2.26813	0.0350076	0.116914	-4.11582	118	110	156	142
AF230666.2	-0.434893	1.4958	-1.71251	0.102863	0.24485	-4.82371	77	100	71	56
AFF1	0.0267133	8.3101	0.652922	0.521528	0.696551	-7.80602	8512	8432	7920	8877
AFF4	-0.139904	6.23272	-2.03001	0.0564041	0.16199	-5.69191	2078	2178	1681	2089
AFG3L1P	-0.00668155	5.06011	-0.0892008	0.929844	0.961986	-7.34038	882	919	856	886
AFG3L2	-0.152339	6.28619	-2.67785	0.0147719	0.0635115	-4.465	2168	2264	1956	1920
AFMID	0.121624	5.00561	1.58486	0.129286	0.28459	-6.09235	822	836	886	868
AFTPH	0.0133625	5.44164	0.194563	0.847773	0.91569	-7.43281	1138	1193	1091	1196
AGA	0.0939709	3.68477	0.803258	0.431631	0.622209	-6.57856	350	320	352	343
AGAP1	-0.209657	5.65252	-3.26185	0.00405002	0.0252421	-3.06996	1509	1406	1196	1253
AGAP2	0.119162	3.14212	0.830241	0.416579	0.608986	-6.37599	249	208	242	239
AGAP3	0.244146	6.45075	4.49701	0.000239681	0.00283683	-0.448666	2118	2212	2495	2489
AGAP4	0.136906	2.9503	0.864655	0.397874	0.591492	-6.28348	208	189	184	243
AGAP6	0.121709	5.33559	1.73981	0.0978539	0.236558	-5.94976	1083	1003	1085	1120
AGAP9	-0.36078	2.82815	-2.03154	0.0562355	0.161721	-4.6902	209	223	196	137
AGBL3	0.0397547	0.434171	0.113468	0.910835	0.951253	-5.90921	48	26	38	33
AGBL5	0.202351	4.9898	2.64675	0.0157963	0.066415	-4.19673	815	780	892	892
AGER	-0.50293	1.99246	-2.36271	0.0288098	0.101953	-3.85612	113	143	87	87
AGFG1	-0.217883	6.567	-4.24031	0.000431496	0.00455126	-1.0616	2802	2706	2290	2313
AGFG2	-0.195124	4.09927	-1.84096	0.0810913	0.208597	-5.41597	522	467	387	453
AGGF1	-0.00342484	5.84474	-0.0571398	0.955023	0.976058	-7.55844	1537	1562	1482	1523
AGK	-0.0824783	5.52954	-1.16757	0.257237	0.448898	-6.78606	1223	1339	1189	1161
AGL	0.0263332	6.00329	0.427951	0.673436	0.81037	-7.50348	1783	1644	1604	1789
AGMAT	-0.281196	3.47388	-2.27533	0.0344953	0.115894	-4.4547	329	330	254	273
AGO1	0.115276	5.26022	1.65257	0.114634	0.263269	-6.06368	997	986	1022	1066
AGO2	-0.252861	6.27795	-4.07346	0.000632992	0.00612452	-1.38478	2231	2335	1713	2019
AGO3	0.119746	5.01408	1.58697	0.128808	0.284053	-6.09173	844	825	880	883
AGO4	0.091757	3.74605	0.64963	0.523607	0.697768	-6.71205	292	419	357	367
AGPAT1	-0.158994	6.0204	-2.41011	0.0261019	0.0946415	-4.93947	1903	1791	1687	1534
AGPAT2	-0.299155	4.5352	-3.28846	0.00381356	0.0240852	-2.70117	703	681	569	526
AGPAT3	-0.12957	7.80938	-3.10323	0.00578686	0.0326422	-3.85024	6341	6297	5636	5594
AGPAT5	-0.0485527	8.17571	-1.21606	0.238662	0.425523	-7.25931	8092	7755	7137	7762
AGPAT6	0.0342037	6.43306	0.619898	0.542593	0.713185	-7.49548	2248	2352	2306	2272
AGPAT9	-0.517639	-0.00343315	-1.39334	0.179396	0.351038	-4.92464	37	27	24	19
AGPS	-0.0622622	7.38464	-1.36027	0.189459	0.364914	-6.95185	4728	4475	4093	4477
AGRN	-1.96709	6.52628	-30.7264	7.94128e-18	3.28346e-14	30.9207	5016	4798	1297	1149
AGTPBP1	-0.184925	5.49473	-2.44593	0.024215	0.0901568	-4.73609	1309	1282	996	1228
AGTRAP	-0.233385	5.45651	-3.4419	0.00269193	0.0186749	-2.61945	1301	1264	1005	1117
AHCTF1	0.0166201	7.44643	0.37623	0.71086	0.836258	-7.81675	4771	4574	4415	4776
AHCTF1P1	0.0549696	3.7206	0.411678	0.685122	0.818914	-6.83321	370	328	298	413
AHCY	0.00951324	8.64478	0.233318	0.817978	0.900178	-8.04609	10870	10620	10749	10286
AHCYL1	0.0644541	7.17875	1.41694	0.172479	0.342693	-6.83977	3889	3745	3761	3999
AHCYL2	0.223293	3.51969	1.83822	0.081511	0.209243	-5.23498	282	289	316	332
AHDC1	-0.402033	4.1386	-3.80879	0.00116278	0.0097784	-1.42211	569	521	422	381
AHI1	0.113417	4.86333	1.35279	0.191797	0.367648	-6.37151	801	708	802	783
AHNAK	-1.99467	7.13871	-37.0398	2.30299e-19	2.00611e-15	34.3985	7562	7600	1701	2005
AHNAK2	-5.30211	0.566699	-11.7187	3.29088e-10	4.80237e-08	9.42618	230	271	8	4
AHR	0.35025	2.84878	2.28308	0.0339524	0.114597	-4.24809	179	164	211	214
AHRR	-0.138679	1.47452	-0.576285	0.571099	0.735074	-6.02799	77	79	73	65
AHSA1	0.284009	7.3742	6.42883	3.43133e-06	8.44489e-05	3.70053	4117	3984	4623	4967
AHSA2	0.0758842	5.58063	1.1746	0.254479	0.445463	-6.79224	1256	1254	1287	1285
AHSP	-0.124407	7.35856	-2.69146	0.0143434	0.0621865	-4.64626	4789	4448	3979	4255
AIDA	-0.128263	6.21855	-2.13124	0.0461675	0.14123	-5.50842	2027	2168	1898	1832
AIFM1	0.127316	6.57321	2.52012	0.0207054	0.0807133	-4.84396	2480	2428	2551	2660
AIFM2	-0.678164	4.36603	-6.57514	2.53224e-06	6.65464e-05	4.65871	758	651	393	462
AIG1	-0.288388	3.46621	-2.28416	0.0338771	0.114468	-4.43578	320	337	268	255
AIM1	0.101406	8.78161	2.71937	0.0135018	0.0596213	-4.80549	11815	11087	11557	12321
AIMP1	0.161109	6.20186	2.91845	0.00872985	0.0438756	-3.94528	1880	1870	1964	2113
AIMP2	-0.101697	5.54979	-1.49643	0.150756	0.314667	-6.37147	1259	1356	1180	1187
AIP	-0.0802871	5.02447	-0.979446	0.339508	0.535851	-6.84353	863	940	857	801
AJUBA	1.0316	1.24906	3.71644	0.00143722	0.0114908	-0.980206	35	56	91	86
AK1	-0.365218	1.09771	-1.35127	0.192276	0.368395	-5.21665	69	61	52	46
AK2	0.0915619	8.43502	2.42326	0.0253937	0.0928059	-5.35275	9110	8955	8980	9739
AK3	-0.0361573	5.88395	-0.606734	0.551116	0.71859	-7.37844	1590	1631	1501	1552
AK4	-0.262034	6.90722	-5.34898	3.51144e-05	0.000598295	1.40698	3636	3446	2861	2878
AK4P1	-0.304555	1.54247	-1.2454	0.227928	0.412913	-5.45992	99	76	61	76
AK4P3	0.374664	0.399457	1.05376	0.30504	0.501221	-5.38013	41	23	32	47
AK9	-0.162269	1.92156	-0.769378	0.451006	0.638878	-6.03235	113	102	99	88
AKAP1	-0.0149164	6.90677	-0.310842	0.759261	0.866272	-7.74066	3219	3279	3027	3225
AKAP10	0.120171	4.97407	1.56807	0.133154	0.289711	-6.10777	808	815	859	856
AKAP11	-0.0904964	6.73164	-1.67751	0.109604	0.255359	-6.37776	2939	2970	2515	2888
AKAP13	-0.103573	4.19649	-0.972149	0.343033	0.539083	-6.59552	471	556	438	488
AKAP17A	0.10958	6.0734	1.85651	0.0787501	0.204398	-5.95209	1754	1737	1863	1800
AKAP5	0.436409	0.674607	1.43033	0.168652	0.337794	-5.01926	37	36	42	55
AKAP6	0.437182	1.27103	1.54949	0.137546	0.296344	-5.0017	42	73	74	72
AKAP8	-0.0822774	6.62942	-1.60141	0.125566	0.279225	-6.47208	2824	2665	2497	2541
AKAP8L	0.0194351	7.10123	0.374085	0.712429	0.837073	-7.75507	3593	3754	3714	3527
AKAP9	-0.211123	6.02812	-3.1678	0.0050064	0.0295558	-3.36811	2001	1788	1472	1711
AKIP1	0.0806316	4.15757	0.785053	0.441976	0.631526	-6.74847	439	497	469	491
AKIRIN1	-0.029967	6.4812	-0.575124	0.571868	0.735682	-7.53321	2431	2431	2306	2323
AKIRIN2	-0.042553	5.74017	-0.68223	0.503219	0.681211	-7.29196	1506	1417	1338	1420
AKNA	-0.0611692	2.73635	-0.377236	0.710125	0.835845	-6.5196	174	192	177	164
AKR1A1	0.177894	5.99997	3.10341	0.0057845	0.0326422	-3.50259	1634	1607	1743	1821
AKR1B1	-0.0309794	3.05614	-0.218486	0.82935	0.906443	-6.67363	228	224	209	221
AKR1C1	-1.14874	0.0460917	-2.88339	0.00943215	0.0463771	-2.55214	37	45	26	12
AKR1C3	-0.531474	0.613386	-1.66082	0.112948	0.26075	-4.69515	51	47	40	27
AKR1E2	-0.622854	1.48003	-2.36659	0.0285782	0.101223	-3.72383	96	90	44	77
AKR7A2	0.0508283	5.26734	0.65705	0.518927	0.694216	-7.18004	961	1080	1040	1012
AKR7A2P1	-0.145922	-0.069949	-0.391658	0.699612	0.829398	-5.72236	28	25	27	20
AKR7A3	-0.368909	1.4465	-1.42306	0.170721	0.340619	-5.21522	73	94	72	54
AKT1	-0.00321092	6.90957	-0.0675021	0.946878	0.972057	-7.78943	3297	3187	3100	3188
AKT1S1	-0.000143167	6.66294	-0.00272603	0.997853	0.998819	-7.7429	2700	2758	2688	2618
AKT2	-0.0639726	7.78081	-1.57622	0.131265	0.287214	-6.71945	6143	5971	5518	5746
AKTIP	-0.729874	0.717168	-2.42933	0.025073	0.0922044	-3.4644	56	57	35	31
AL031320.1	-0.288512	3.0217	-1.94568	0.0664412	0.181274	-4.89688	261	223	186	198
AL049840.1	0.0144043	0.603856	0.0464636	0.963419	0.980815	-5.95684	36	45	38	41
AL136419.6	0.237154	0.322403	0.678367	0.505612	0.682964	-5.66668	32	29	44	28
AL161915.1	1.29944	-0.383552	3.15152	0.00519286	0.0302832	-2.04432	10	16	32	30
AL357673.1	0.0716919	3.28284	0.508821	0.616659	0.769836	-6.64102	252	258	285	239
AL591025.1	-0.286632	0.606229	-0.867396	0.396408	0.590281	-5.59478	38	53	28	45
AL592188.7	0.0561463	1.56329	0.164207	0.871279	0.930132	-6.20705	110	55	50	122
AL627309.1	-0.154017	0.685134	-0.50176	0.621526	0.773726	-5.85489	40	51	42	37
AL773604.8	-0.191108	-0.224185	-0.459731	0.650858	0.793679	-5.66064	20	29	28	15
ALAD	-0.265736	6.26685	-4.91264	9.32176e-05	0.001326	0.542503	2270	2278	1800	1877
ALAS1	0.0171758	5.48641	0.247649	0.807028	0.894023	-7.43306	1235	1165	1208	1154
ALAS2	-0.314207	6.53784	-6.13781	6.33178e-06	0.000141258	3.22414	2777	2804	2137	2226
ALCAM	-0.208239	2.58868	-1.06093	0.30185	0.49809	-5.98021	141	214	148	144
ALDH16A1	0.0807468	6.94503	1.61135	0.123376	0.27616	-6.51986	3291	3163	3367	3269
ALDH18A1	-0.0213301	7.65428	-0.505956	0.618632	0.771443	-7.79273	5602	5334	5127	5345
ALDH1A1	-0.313275	0.299428	-0.940197	0.358764	0.553841	-5.4619	38	35	26	31
ALDH1B1	0.0903063	6.54139	1.76793	0.092918	0.228319	-6.19775	2470	2393	2478	2554
ALDH3A2	-0.116813	4.68298	-1.35404	0.191405	0.367123	-6.31533	761	681	640	651
ALDH3B1	-0.799531	5.18356	-10.1862	3.41735e-09	3.0063e-07	11.205	1317	1264	757	687
ALDH4A1	0.0920271	5.53207	1.36946	0.186619	0.361184	-6.53952	1255	1160	1251	1250
ALDH5A1	-0.132127	6.63349	-2.64591	0.0158251	0.0664729	-4.60264	2831	2768	2433	2533
ALDH6A1	-0.233402	4.40976	-2.57149	0.018562	0.0748029	-4.17595	632	609	495	531
ALDH9A1	-0.236722	5.55533	-3.59433	0.00190097	0.014282	-2.30393	1357	1393	1084	1185
ALDOA	0.00844213	9.92084	0.265524	0.793428	0.886798	-8.21304	26313	25755	25520	25388
ALDOC	0.13796	3.40253	1.08875	0.289707	0.484695	-6.21669	274	268	292	288
ALG1	0.0798429	5.4467	1.15895	0.260649	0.452941	-6.77344	1157	1127	1197	1151
ALG10	-0.0343543	3.0191	-0.222063	0.826604	0.904926	-6.66041	232	210	182	240
ALG10B	-0.281352	2.93643	-1.88671	0.0743734	0.19599	-4.96848	234	220	172	191
ALG11	0.0596988	4.18207	0.549191	0.589188	0.749414	-6.917	485	473	427	549
ALG12	-0.0385359	3.43916	-0.304153	0.764275	0.869411	-6.77876	310	282	266	294
ALG13	0.0303152	5.24611	0.403427	0.691079	0.823374	-7.31288	1041	983	931	1081
ALG14	-0.0831128	3.56381	-0.616916	0.544517	0.714502	-6.67214	340	316	257	350
ALG1L13P	-0.381163	1.90127	-1.76626	0.0932044	0.228842	-4.85145	107	122	92	79
ALG1L6P	-0.180891	2.93351	-1.15221	0.26334	0.456211	-5.99252	245	195	181	194
ALG1L9P	-0.726734	0.0736335	-2.04729	0.054523	0.158571	-4.01525	37	35	19	23
ALG2	0.0345496	5.14541	0.471893	0.642307	0.787894	-7.25315	973	911	923	952
ALG3	0.185393	6.74965	3.60888	0.00183875	0.0138649	-2.54007	2778	2658	3035	2974
ALG5	0.127637	5.16659	1.73269	0.0991406	0.238646	-5.91368	918	933	930	1037
ALG6	0.0433675	4.47218	0.490422	0.629378	0.778883	-7.04155	587	590	577	602
ALG8	0.101518	5.85317	1.70097	0.105044	0.248256	-6.14848	1493	1513	1529	1606
ALG9	0.0149842	3.14064	0.0965472	0.924084	0.958759	-6.7219	233	238	265	203
ALG9	0.0149842	3.14064	0.0965472	0.924084	0.958759	-6.7219	0	0	0	0
ALKBH1	0.0636994	4.34352	0.690966	0.497834	0.677395	-6.87905	543	526	532	554
ALKBH2	0.249521	5.40559	3.49458	0.00238737	0.0170778	-2.489	998	1098	1197	1222
ALKBH3	-0.0299184	4.94928	-0.315656	0.75566	0.863794	-7.26001	916	772	715	894
ALKBH4	0.14964	4.31004	1.58715	0.128766	0.284053	-5.87785	506	508	519	575
ALKBH5	0.0912792	6.37246	1.73179	0.0993033	0.238944	-6.21956	2177	2147	2181	2297
ALKBH6	0.0232515	1.71177	0.0966593	0.923996	0.958759	-6.26049	92	82	103	72
ALKBH7	0.0451986	4.83488	0.53029	0.601974	0.759546	-7.13211	710	806	743	774
ALKBH8	0.269225	4.76208	3.02885	0.00683296	0.0368184	-3.33244	720	615	737	824
ALMS1	-0.227971	5.62024	-3.40822	0.00290629	0.0196885	-2.73747	1380	1489	1180	1199
ALMS1-IT1	-1.19737	-0.468171	-2.93062	0.00849812	0.0429371	-2.44827	30	28	12	12
ALOX12	-0.341369	4.60134	-3.69788	0.00149968	0.0118333	-1.80746	731	739	599	532
ALOX12B	0.217777	2.08962	1.04897	0.30718	0.502939	-5.83627	94	119	128	112
ALOX5	-0.436698	5.46088	-6.55689	2.62967e-06	6.86704e-05	4.35575	1374	1386	961	1021
ALPL	-1.27046	-0.168328	-3.19374	0.00472257	0.0282938	-1.96403	30	45	14	15
ALS2	-0.0549003	7.12964	-1.15153	0.263615	0.456459	-7.16006	3855	3835	3410	3792
ALX1	0.0849149	1.5772	0.351953	0.728697	0.845489	-6.16233	91	66	80	80
ALYREF	0.0871843	7.64967	2.04417	0.0548586	0.159173	-5.9394	5398	5102	5275	5565
AMBRA1	-0.10077	5.89967	-1.58164	0.13002	0.285489	-6.33971	1640	1689	1554	1466
AMD1	-0.084553	8.4521	-2.31296	0.0319306	0.109714	-5.56753	9756	9673	8691	9121
AMDHD2	-0.0188152	4.17321	-0.187347	0.853349	0.919853	-7.05201	512	466	475	463
AMER1	-0.141225	5.38305	-2.05424	0.0537834	0.157015	-5.43628	1164	1196	1041	1039
AMFR	0.0554215	6.27779	0.873088	0.393374	0.587669	-7.26934	2073	2025	2181	1967
AMH	0.438579	4.25195	3.46236	0.00256937	0.0180129	-2.23215	409	473	663	509
AMHR2	-2.43446	0.412595	-6.93383	1.2169e-06	3.6637e-05	4.92694	78	88	15	14
AMIGO1	-0.386384	0.651904	-1.27109	0.218841	0.40197	-5.20609	45	51	34	37
AMIGO2	0.550563	2.76196	3.47488	0.0024971	0.0176425	-1.78062	155	146	216	213
AMMECR1	0.0062676	8.959	0.165517	0.870263	0.929858	-8.10344	13571	13188	12352	13798
AMMECR1L	0.01331	5.14519	0.176075	0.862073	0.924339	-7.35284	971	927	870	994
AMN	-0.185883	2.22601	-0.917598	0.370182	0.56479	-6.00433	157	114	118	111
AMN1	0.0306797	0.973937	0.11061	0.91307	0.952462	-6.04837	56	48	50	53
AMPD2	-0.107616	6.67305	-1.86654	0.0772728	0.201491	-6.06367	2796	2909	2675	2477
AMPD3	-0.689449	3.80693	-6.00466	8.41071e-06	0.000178032	3.57715	483	473	301	276
AMT	-0.64648	-0.214664	-1.6438	0.116449	0.265922	-4.56602	28	29	22	14
AMZ2	0.0111531	4.86946	0.142527	0.888145	0.939465	-7.27797	794	774	748	788
AMZ2P1	0.192908	1.87915	0.831646	0.415805	0.608213	-5.97056	92	92	124	85
ANAPC1	-0.0849666	7.59883	-1.93442	0.0678955	0.183651	-6.12088	5314	5441	4948	4908
ANAPC10	-0.0448278	3.7834	-0.390129	0.700724	0.830081	-6.86276	374	379	325	386
ANAPC11	0.047495	6.04033	0.83722	0.412741	0.605015	-7.24663	1754	1733	1718	1785
ANAPC13	-0.0173098	5.79213	-0.283649	0.779708	0.878886	-7.50457	1519	1484	1385	1500
ANAPC15	-0.324955	2.86275	-1.94522	0.0664993	0.181327	-4.84793	252	190	159	181
ANAPC16	0.0310109	5.68588	0.463425	0.648256	0.792682	-7.40725	1376	1368	1263	1467
ANAPC2	-0.0826726	6.31089	-1.52409	0.143744	0.3051	-6.51779	2170	2231	1991	2048
ANAPC4	-0.0234375	5.75739	-0.329378	0.745427	0.85685	-7.48096	1477	1462	1269	1552
ANAPC5	0.0229629	8.04898	0.517934	0.610405	0.765284	-7.84892	6924	7232	7108	6873
ANAPC7	-0.00806265	6.56797	-0.150987	0.881556	0.93556	-7.71145	2673	2456	2439	2515
ANGEL1	0.333936	5.61971	5.21888	4.68907e-05	0.000757334	1.38502	1208	1151	1430	1460
ANGEL2	-0.0686323	5.12682	-0.872595	0.393636	0.58773	-6.97241	955	973	819	972
ANGPTL6	-0.25463	1.46097	-1.06233	0.301228	0.497263	-5.63678	79	82	66	65
ANK1	-0.174111	10.1586	-5.26155	4.26395e-05	0.000700531	0.731939	32609	32793	28562	27794
ANK3	0.197324	1.97827	0.955204	0.351316	0.547335	-5.89306	108	90	109	111
ANKAR	0.435255	1.62471	1.90157	0.0722993	0.192117	-4.56448	69	73	88	99
ANKDD1A	0.0868775	3.15473	0.577371	0.57038	0.734421	-6.56003	267	202	231	249
ANKEF1	-0.44729	2.02091	-2.07525	0.0515997	0.152464	-4.37887	110	147	92	89
ANKFY1	-0.206119	6.97336	-4.12268	0.000565307	0.00563603	-1.41028	3574	3699	2906	3226
ANKH	0.0662818	3.03715	0.44444	0.66168	0.801431	-6.59028	198	235	210	229
ANKHD1	0.0704486	2.41324	0.397721	0.695212	0.826472	-6.40752	137	142	146	139
ANKHD1-EIF4EBP3	0.218811	-0.0719396	0.584156	0.565898	0.731187	-5.63333	20	27	29	24
ANKIB1	0.014057	5.86169	0.211901	0.834412	0.909555	-7.54086	1491	1630	1439	1624
ANKLE1	-0.180186	7.42971	-3.72009	0.00142523	0.0114129	-2.41249	4858	5028	4338	4146
ANKLE2	0.127066	6.38452	2.26892	0.0349511	0.116855	-5.29086	2120	2186	2321	2251
ANKMY1	-0.181937	4.38125	-1.92772	0.0687729	0.18565	-5.36109	580	615	522	502
ANKMY2	0.257929	5.65899	4.05531	0.000659951	0.0063018	-1.28357	1235	1254	1387	1507
ANKRA2	-0.157339	2.90242	-1.03586	0.313102	0.50954	-6.10654	203	222	176	194
ANKRD10	0.215277	5.57426	3.0881	0.00598621	0.0334022	-3.42957	1128	1257	1332	1355
ANKRD10-IT1	0.160797	2.60114	0.94659	0.355578	0.55091	-6.0976	143	166	170	165
ANKRD11	-0.0334838	7.59662	-0.792656	0.437637	0.628221	-7.5919	5235	5314	4945	5073
ANKRD12	-0.184939	4.84127	-2.20783	0.0395774	0.127215	-5.00527	805	842	652	758
ANKRD13A	-0.035356	5.91905	-0.590485	0.561733	0.727708	-7.39717	1614	1686	1540	1589
ANKRD13B	-0.222329	4.56653	-2.07555	0.0515698	0.152412	-5.16201	648	731	637	518
ANKRD13C	-0.0360468	4.97591	-0.431266	0.671065	0.808145	-7.22297	862	855	737	896
ANKRD13D	0.00758299	4.44615	0.0834326	0.934369	0.964379	-7.15462	593	577	582	562
ANKRD16	0.26746	3.61803	2.10212	0.048925	0.14687	-4.81676	276	328	365	340
ANKRD17	0.016047	8.18997	0.40803	0.687754	0.821147	-7.92291	7852	7795	7363	8025
ANKRD18B	-0.0508788	4.52683	-0.552184	0.587176	0.747775	-7.02539	597	668	593	592
ANKRD18EP	-0.29504	3.123	-2.12086	0.0471342	0.143192	-4.62546	263	256	199	212
ANKRD20A7P	-0.0201865	0.0467938	-0.0489109	0.961494	0.980054	-5.8215	42	18	21	33
ANKRD24	0.0511963	0.0355967	0.127764	0.89966	0.946367	-5.81225	32	22	38	19
ANKRD26	-0.0913317	4.37126	-0.941821	0.357953	0.55307	-6.68062	562	589	481	571
ANKRD27	-0.113838	7.90271	-2.70596	0.0139001	0.0607991	-4.70679	6640	6770	6058	5988
ANKRD28	-0.232908	5.76628	-3.66215	0.00162762	0.0126182	-2.20463	1591	1588	1235	1397
ANKRD32	0.102389	5.02379	1.27794	0.216465	0.398905	-6.51308	801	892	882	882
ANKRD33B	-0.376443	0.663849	-1.03262	0.31458	0.51094	-5.4606	53	44	22	58
ANKRD34A	0.68519	0.369672	2.07355	0.0517734	0.152779	-4.02004	29	25	45	40
ANKRD36	-0.503867	4.29705	-4.89089	9.79107e-05	0.00137848	0.992755	653	609	386	482
ANKRD36B	-0.261623	3.05207	-1.71405	0.102574	0.244396	-5.27976	273	218	202	194
ANKRD36BP2	-0.0497998	5.49964	-0.734135	0.471713	0.655369	-7.18991	1256	1224	1095	1236
ANKRD36C	-0.697107	3.20737	-4.42331	0.000283677	0.00325808	0.225189	281	357	168	213
ANKRD37	0.119679	1.38211	0.404396	0.690379	0.822991	-6.08576	53	84	91	55
ANKRD39	-0.00614993	2.93857	-0.0386522	0.969566	0.983822	-6.65847	184	232	188	212
ANKRD40	0.0378309	5.30739	0.541637	0.594282	0.753652	-7.26249	1033	1072	1037	1063
ANKRD42	0.175791	3.44202	1.41235	0.173806	0.344447	-5.84113	279	271	294	310
ANKRD46	0.166139	5.65001	2.61424	0.0169394	0.0698733	-4.44355	1314	1240	1358	1427
ANKRD49	-0.232235	4.11476	-2.30551	0.0324237	0.110794	-4.60098	505	506	395	442
ANKRD50	0.0423046	4.83802	0.529682	0.602388	0.759546	-7.13339	743	775	742	777
ANKRD52	-0.127183	6.9552	-2.64814	0.0157492	0.0662888	-4.66108	3446	3541	3005	3214
ANKRD54	0.0364406	4.83704	0.394848	0.697295	0.827856	-7.19762	838	688	776	740
ANKRD61	-0.566513	0.747843	-1.77772	0.0912502	0.225382	-4.55232	45	66	41	31
ANKRD9	0.118369	5.21157	1.64277	0.116664	0.266316	-6.06487	976	939	1016	1005
ANKS1A	0.304726	6.21172	5.3729	3.33024e-05	0.000572632	1.59677	1824	1769	2048	2269
ANKS3	0.112069	4.29693	1.15471	0.262342	0.454926	-6.43685	484	535	529	540
ANKS6	-0.0886502	1.65699	-0.373691	0.712718	0.8372	-6.17789	85	89	92	69
ANKZF1	-0.00638765	5.36088	-0.0860853	0.932288	0.962952	-7.42623	1096	1121	1120	1029
ANLN	-0.211455	6.44224	-4.06259	0.000648998	0.0062292	-1.44438	2526	2514	2087	2144
ANO10	0.0118521	4.10156	0.11209	0.911913	0.951839	-7.04044	499	424	440	462
ANO5	0.0521873	4.43009	0.484123	0.63376	0.782127	-7.03141	523	620	617	535
ANO6	0.0688317	4.8867	0.849	0.406315	0.599492	-6.92328	746	811	765	821
ANO7	0.398594	2.40512	2.19109	0.0409399	0.130029	-4.28556	133	115	166	152
ANO8	-0.991776	3.05792	-6.50894	2.90441e-06	7.35232e-05	4.76427	301	331	164	145
ANP32A	0.137495	8.27443	3.0965	0.0058748	0.0330032	-3.93509	8034	7875	7914	9129
ANP32B	0.0636912	8.84267	1.63761	0.117743	0.267881	-6.7826	12608	11607	11869	12720
ANP32E	0.0557075	7.70196	1.3219	0.201694	0.380215	-7.05562	5593	5412	5341	5781
ANPEP	-0.577957	5.95262	-8.29251	8.86935e-08	4.16725e-06	7.72116	2058	2015	1419	1242
ANTXR2	0.040588	1.45699	0.165649	0.87016	0.929858	-6.17565	73	72	63	83
ANXA1	-0.158525	2.33263	-0.856167	0.402436	0.595761	-6.09214	145	141	111	139
ANXA11	-0.0407607	6.10085	-0.663916	0.514617	0.69032	-7.39309	1822	1928	1811	1733
ANXA2	-0.395512	6.86121	-8.12919	1.19939e-07	5.37085e-06	7.2386	3674	3511	2574	2735
ANXA2P2	-0.438973	2.59522	-2.51429	0.0209629	0.0812319	-3.7335	172	208	128	143
ANXA2R	0.634496	1.98308	3.09819	0.00585249	0.0329077	-2.39809	88	82	129	128
ANXA4	-0.384114	4.29508	-4.05961	0.00065346	0.00625426	-0.899332	605	602	451	448
ANXA5	-0.793368	4.21896	-7.81118	2.1805e-07	9.01563e-06	7.16556	694	627	373	367
ANXA6	-0.509022	3.82938	-4.56957	0.000203089	0.00248924	0.391324	444	469	307	316
ANXA7	0.0466141	6.73171	0.928258	0.364766	0.559421	-7.31419	2767	2867	2793	2862
ANXA9	-0.219242	2.23341	-1.10235	0.283898	0.478851	-5.82483	131	142	96	134
AOC2	0.247853	1.54058	1.00195	0.328796	0.524569	-5.71925	60	85	84	81
AOC3	0.722348	0.0305167	1.98728	0.0613067	0.171543	-4.10412	19	23	37	31
AP000254.8	0.240352	0.452561	0.713118	0.484328	0.665588	-5.67445	28	40	32	46
AP000347.2	-0.304682	1.12061	-1.09942	0.285143	0.479802	-5.50771	64	65	60	43
AP000350.5	-0.285335	0.779577	-0.9603	0.34881	0.544917	-5.55689	50	51	45	36
AP000487.5	0.464069	-4.58218e-05	1.20969	0.241043	0.427984	-5.13556	28	18	24	38
AP001053.11	-0.571397	2.43268	-3.13923	0.00533822	0.0308552	-2.41663	194	161	114	117
AP001062.7	0.0661098	0.878624	0.214674	0.832279	0.908345	-6.0062	62	37	44	54
AP001205.1	-0.276884	1.73988	-1.25651	0.223963	0.408174	-5.50281	98	99	81	77
AP001469.9	-0.0132674	1.32814	-0.0529664	0.958304	0.977936	-6.15093	71	64	67	63
AP001628.6	0.568797	1.1008	2.10757	0.048398	0.145784	-4.10056	50	44	71	65
AP001816.1	0.0417258	0.477788	0.131706	0.896584	0.944635	-5.91781	35	38	37	36
AP001877.1	0.302843	0.787348	0.999594	0.329906	0.525624	-5.52313	39	44	41	60
AP003068.23	-0.651709	0.741874	-2.03505	0.0558495	0.160994	-4.14758	71	44	36	33
AP006216.11	0.145229	-0.0834531	0.357045	0.724942	0.843149	-5.73187	16	35	24	27
AP006222.2	-0.319256	1.39087	-1.29675	0.210044	0.390262	-5.35826	83	74	62	60
AP006621.1	0.420176	1.56593	1.79026	0.089152	0.22228	-4.725	68	69	81	98
AP006621.5	0.178662	1.03131	0.61956	0.542811	0.713396	-5.88031	64	41	54	59
AP1AR	0.28634	4.59935	3.33483	0.00343333	0.0223028	-2.61934	579	603	682	719
AP1B1	0.000759035	8.02404	0.0173807	0.986312	0.992795	-7.98491	6862	7159	6904	6731
AP1G1	-0.0663312	7.20421	-1.48437	0.153901	0.318908	-6.75166	4099	4030	3681	3866
AP1G2	-0.0771642	4.15493	-0.711194	0.485492	0.666302	-6.80344	503	481	492	419
AP1M1	-0.0830171	6.7472	-1.48486	0.153772	0.318854	-6.66385	2952	3002	2837	2633
AP1S1	0.08229	5.57571	1.26887	0.219615	0.402855	-6.67886	1284	1213	1269	1300
AP1S2	-0.0263449	3.27857	-0.198566	0.844684	0.914262	-6.75251	272	255	239	264
AP1S3	0.106595	2.84853	0.678897	0.505283	0.682869	-6.39414	175	199	182	209
AP2A1	-0.282559	8.07623	-7.03987	9.83138e-07	3.12688e-05	4.87709	8113	7922	6424	6390
AP2A2	-0.036206	6.12282	-0.649054	0.523971	0.697953	-7.40821	1923	1878	1774	1829
AP2B1	-0.0648775	8.66639	-1.80709	0.0864028	0.217697	-6.49267	11263	11123	10316	10486
AP2M1	0.0343724	8.5603	0.951399	0.353194	0.548755	-7.59818	10103	9994	9723	10286
AP2S1	-0.0354829	6.96159	-0.689888	0.498497	0.677795	-7.55498	3511	3288	3279	3169
AP3B1	0.0882497	6.48951	1.68033	0.109046	0.254392	-6.32429	2366	2329	2320	2534
AP3B2	-1.12366	-0.248141	-2.89737	0.00914575	0.0453594	-2.51326	33	33	13	16
AP3D1	0.0429276	8.48131	0.965423	0.346304	0.542371	-7.57365	9357	9610	9797	9208
AP3M1	0.0102893	6.46084	0.196858	0.846002	0.914836	-7.68081	2418	2311	2263	2366
AP3M2	-0.142552	5.71265	-2.27405	0.0345858	0.116072	-5.12379	1478	1489	1310	1303
AP3S1	0.0247491	5.93219	0.417674	0.680807	0.815758	-7.49062	1677	1585	1568	1657
AP3S2	-0.114526	3.13373	-0.793374	0.437229	0.627852	-6.40275	256	235	235	207
AP4B1	-0.214988	5.03133	-2.82739	0.0106675	0.0507749	-3.8353	928	970	768	821
AP4E1	-0.162474	5.45183	-2.4507	0.0239735	0.089509	-4.71545	1263	1231	1054	1112
AP4M1	0.214562	3.7496	1.90032	0.0724712	0.192376	-5.20684	330	342	365	393
AP4S1	-0.393747	1.87643	-1.82378	0.0837479	0.213089	-4.75471	115	111	73	95
AP5B1	0.0929523	3.91834	0.872641	0.393612	0.58773	-6.59737	389	399	393	424
AP5M1	0.00488013	5.71427	0.0779134	0.938701	0.96708	-7.5234	1451	1373	1332	1422
AP5S1	-0.0176261	3.72087	-0.154228	0.879035	0.934488	-6.90872	357	357	324	362
AP5Z1	-0.215719	5.4733	-3.19996	0.00465682	0.027986	-3.15862	1273	1305	1085	1073
APAF1	0.27212	4.32835	2.73942	0.0129265	0.0577802	-3.81135	508	477	527	632
APBA3	0.410993	4.18543	3.98958	0.000767559	0.00705672	-1.028	413	436	572	527
APBB1IP	-0.0988941	5.68373	-1.51724	0.145456	0.307136	-6.37778	1480	1387	1231	1372
APBB3	-0.186071	3.67831	-1.52244	0.144154	0.305447	-5.76637	344	392	324	304
APC	-0.188647	6.15703	-3.24786	0.00417999	0.0258984	-3.22214	2090	2015	1651	1853
APC2	-0.0984863	6.44876	-1.863	0.0777914	0.202552	-6.02354	2450	2418	2215	2205
APEH	-0.0381977	8.46694	-0.871559	0.394188	0.587925	-7.65836	9598	9715	9428	8867
APEX1	0.0203708	7.79587	0.497395	0.624543	0.776391	-7.82036	6012	5877	5654	6070
APEX2	-0.308694	5.70284	-4.10897	0.000583398	0.00575693	-1.16992	1544	1576	1319	1139
APH1A	0.158377	6.51195	3.02563	0.00688213	0.0369404	-3.782	2358	2295	2529	2519
APH1B	-0.644803	1.38633	-2.26161	0.0354773	0.117947	-3.8921	100	77	39	75
API5	0.0567458	7.94288	1.33986	0.195893	0.373193	-7.07096	6705	6300	6295	6855
APIP	0.203179	4.87535	2.37828	0.0278924	0.099476	-4.69483	752	722	751	903
APITD1	-0.22917	2.78282	-1.35485	0.191153	0.366852	-5.70144	223	180	147	187
APLF	0.702861	1.33619	2.75708	0.0124393	0.0562103	-2.95549	58	48	88	80
APLP2	-0.00445012	8.85869	-0.128041	0.899445	0.946286	-8.09547	12684	12367	11821	12456
APMAP	0.112362	6.30563	2.099	0.0492293	0.147569	-5.58592	2071	2027	2120	2186
APOA1BP	0.133461	6.00119	2.24692	0.0365567	0.120501	-5.24659	1626	1669	1672	1843
APOBEC3B	-0.136893	6.03171	-2.31954	0.0315002	0.108596	-5.11632	1861	1835	1545	1725
APOBEC3C	-0.216999	7.72941	-5.28368	4.05912e-05	0.000674924	1.11806	6263	6064	5060	5248
APOBEC3D	-0.145888	2.64694	-0.872767	0.393545	0.58773	-6.17802	165	190	148	163
APOBEC3F	-0.942317	1.10058	-3.41705	0.00284852	0.0194244	-1.58784	72	88	39	41
APOBEC3G	-0.799278	2.52646	-4.06079	0.000651694	0.00624699	-0.429282	239	174	125	104
APOBR	-1.38373	1.33338	-5.17672	5.15167e-05	0.000821354	2.06514	111	107	48	34
APOC1	-0.712207	2.26352	-3.41748	0.00284576	0.01942	-1.78064	147	186	82	116
APOL1	-1.11462	3.90853	-10.0092	4.5506e-09	3.83984e-07	11.0686	598	592	252	282
APOL2	0.0223146	4.69337	0.256555	0.800244	0.89012	-7.2012	737	648	661	704
APOL4	-0.330214	6.76196	-6.54787	2.67925e-06	6.93807e-05	4.06251	3372	3185	2523	2545
APOLD1	-0.206995	1.57289	-0.877815	0.390867	0.585185	-5.84069	78	94	70	74
APOM	-0.00565773	1.54956	-0.0243237	0.980845	0.989281	-6.21628	78	79	76	76
APOO	0.186542	3.41543	1.38463	0.182004	0.355132	-5.86889	257	282	266	332
APOOL	-0.0519514	3.20298	-0.376109	0.710948	0.836283	-6.67439	240	265	224	249
APOPT1	0.421531	3.14771	2.70656	0.0138823	0.0607821	-3.51416	208	203	304	237
APP	0.123394	8.68271	3.31782	0.00356831	0.0229188	-3.50622	10699	10515	10731	11745
APPBP2	0.239656	4.7185	2.80795	0.0111317	0.0524212	-3.7868	657	648	697	803
APPL1	-0.241077	6.07228	-4.1713	0.000505574	0.00514872	-1.11559	1977	1964	1543	1700
APPL2	0.172072	3.93238	1.58684	0.128836	0.284053	-5.75724	370	405	406	442
APRT	0.0426361	6.84652	0.864269	0.39808	0.591565	-7.39483	2992	3118	2983	3133
APTX	0.135663	5.61831	2.04561	0.0547035	0.158872	-5.51589	1251	1274	1267	1432
AQP1	-2.66005	-0.408013	-6.11154	6.69545e-06	0.000147514	3.13491	0	0	0	0
AQP1	-2.66005	-0.408013	-6.11154	6.69545e-06	0.000147514	3.13491	49	52	9	6
AQP11	0.350034	1.28953	1.19851	0.245264	0.433247	-5.44552	52	64	94	55
AQP3	-1.92052	5.23398	-24.3344	6.35292e-16	1.57603e-12	26.4118	2012	1934	479	534
AQR	-0.104107	6.87201	-2.16768	0.042917	0.134382	-5.57707	3242	3300	2897	3019
ARAF	0.0257842	6.13099	0.462455	0.648939	0.793048	-7.51724	1879	1862	1832	1870
ARAP1	0.0523588	6.59886	0.940405	0.35866	0.553749	-7.27589	2623	2504	2658	2513
ARCN1	0.126732	7.17934	2.77212	0.0120381	0.0550897	-4.44774	3690	3783	3910	4020
AREG	1.60324	1.41577	5.66269	1.76133e-05	0.000334571	3.04739	45	37	97	151
AREL1	-0.235221	6.90171	-4.65503	0.000167154	0.00213092	-0.172924	3536	3451	2938	2834
ARF1	0.0618115	8.41685	1.57304	0.132	0.288261	-6.81972	8889	9133	9166	9117
ARF3	-0.175952	6.05777	-3.02273	0.00692674	0.0370982	-3.68958	1868	1947	1587	1695
ARF4	0.071173	6.67866	1.43848	0.166355	0.334762	-6.71438	2724	2660	2698	2800
ARF5	0.0308389	5.75192	0.456391	0.653216	0.795531	-7.42768	1406	1465	1479	1375
ARF6	0.0536862	7.2339	1.04454	0.309176	0.505272	-7.29534	4231	3743	3913	4119
ARFGAP1	-0.0225444	6.88166	-0.448296	0.658944	0.799759	-7.6814	3107	3298	3011	3115
ARFGAP2	-0.0740974	7.47974	-1.70775	0.103757	0.246411	-6.47019	4869	4998	4460	4650
ARFGAP3	-0.0584356	5.8832	-0.98791	0.335451	0.531341	-7.07005	1642	1602	1495	1533
ARFGEF1	0.0397866	6.76065	0.722653	0.47858	0.660177	-7.492	2785	2981	2710	3054
ARFGEF2	-0.091973	6.84428	-1.85878	0.0784145	0.20374	-6.11056	3134	3258	2823	3006
ARFIP1	0.0271688	5.34554	0.371954	0.71399	0.837544	-7.35363	1046	1124	1094	1055
ARFIP2	0.019432	5.7424	0.255339	0.801169	0.890555	-7.49975	1511	1355	1505	1324
ARFRP1	0.0854501	4.77506	1.04696	0.308086	0.50378	-6.70227	706	725	740	736
ARG2	-0.334425	1.0534	-1.09878	0.285414	0.479842	-5.49077	60	65	34	67
ARGLU1	-0.0798668	6.64097	-1.55358	0.136569	0.294712	-6.54456	2737	2791	2432	2654
ARHGAP1	-0.0666012	5.83015	-0.987061	0.335856	0.531712	-7.05758	1479	1662	1452	1458
ARHGAP11A	-0.12229	8.19052	-3.02485	0.00689406	0.036955	-4.07774	8299	8124	6967	7711
ARHGAP11B	-0.206791	5.67591	-3.19888	0.00466817	0.0280306	-3.21417	1470	1489	1176	1318
ARHGAP12	0.112971	3.52031	0.863545	0.398468	0.591999	-6.4735	324	272	285	341
ARHGAP15	-0.0489647	5.19094	-0.685994	0.500895	0.679325	-7.13837	1018	983	918	962
ARHGAP17	0.103999	5.10411	1.33626	0.197045	0.374413	-6.46282	952	838	905	962
ARHGAP18	-0.229582	4.57621	-2.65991	0.0153547	0.0652585	-4.04823	687	704	557	596
ARHGAP19	0.0443604	5.83182	0.737962	0.469438	0.653818	-7.27525	1497	1524	1489	1539
ARHGAP21	-0.0329961	5.71116	-0.490238	0.629506	0.778891	-7.40037	1355	1503	1335	1376
ARHGAP22	-2.04314	0.428997	-5.71267	1.5796e-05	0.000302834	2.89928	86	62	19	15
ARHGAP23	-1.06327	5.1372	-14.0342	1.44844e-11	3.66663e-09	16.7335	1396	1345	606	669
ARHGAP33	-0.294041	4.7299	-3.57787	0.00197389	0.0147229	-2.11497	785	797	621	633
ARHGAP35	0.103624	7.06488	2.17876	0.0419702	0.132415	-5.59363	3474	3483	3655	3612
ARHGAP39	-0.968676	2.38011	-5.13321	5.67803e-05	0.000883693	1.94783	200	191	107	88
ARHGAP4	-0.152098	6.1206	-2.63694	0.0161333	0.067367	-4.51178	1961	1989	1744	1712
ARHGAP42	-0.40389	2.01936	-1.92683	0.0688904	0.185845	-4.62855	118	133	80	105
ARHGAP44	-0.795572	0.108471	-2.22945	0.0378798	0.123388	-3.72257	34	42	19	23
ARHGAP5	-0.41697	-0.0119119	-1.06363	0.300655	0.496825	-5.28105	37	25	16	30
ARHGAP6	-0.220584	1.63782	-0.974386	0.341949	0.538361	-5.77276	91	89	73	77
ARHGAP9	-0.26602	4.24779	-2.63604	0.0161646	0.0674197	-3.99613	576	545	477	431
ARHGDIA	0.0683414	7.21201	1.34867	0.193096	0.369453	-6.93597	3973	3826	4094	3860
ARHGDIB	0.103882	5.27226	1.32411	0.200973	0.379259	-6.52589	1068	944	972	1130
ARHGDIG	-0.0826357	3.71969	-0.665039	0.513914	0.689605	-6.69255	334	398	347	323
ARHGEF1	0.0709015	7.03978	1.45663	0.161334	0.328871	-6.75986	3495	3420	3577	3485
ARHGEF10	-0.0876538	6.10451	-1.51931	0.144936	0.306371	-6.4787	1936	1884	1764	1731
ARHGEF11	0.174709	3.67569	1.51977	0.144821	0.306371	-5.77025	325	322	350	360
ARHGEF12	-0.0778645	7.27079	-1.68994	0.107168	0.251432	-6.46082	4278	4270	3745	4133
ARHGEF18	-0.00793747	4.71054	-0.0941361	0.925974	0.959699	-7.23608	705	708	698	669
ARHGEF19	-0.65404	1.68452	-2.75468	0.0125044	0.0563401	-3.02881	105	111	78	57
ARHGEF2	-0.525988	6.9827	-10.4922	2.10015e-09	2.08159e-07	11.3925	4165	4010	2809	2711
ARHGEF33	0.593373	0.969928	2.01506	0.0580773	0.165372	-4.22702	34	53	64	61
ARHGEF37	-0.822049	1.25168	-3.08837	0.00598259	0.033397	-2.27949	81	89	39	55
ARHGEF39	-0.0522001	4.2359	-0.507571	0.61752	0.770595	-6.95685	541	492	510	460
ARHGEF6	-0.169772	6.7128	-3.3387	0.00340338	0.0221717	-3.13748	3003	2991	2463	2720
ARHGEF7	0.107817	6.03606	1.85149	0.0795002	0.205785	-5.95178	1673	1732	1774	1792
ARHGEF9	0.0198337	3.61082	0.166968	0.869136	0.929151	-6.87	331	322	303	341
ARID1A	0.16847	7.83275	3.90655	0.00092892	0.00818806	-2.05399	5864	5720	6409	6248
ARID1B	0.0640824	7.24062	1.40202	0.176825	0.347873	-6.87099	3976	3993	3876	4226
ARID2	0.0820865	6.08736	1.45048	0.163023	0.330685	-6.57112	1784	1776	1766	1898
ARID3A	-1.20281	3.00166	-7.41222	4.70451e-07	1.68655e-05	6.5481	339	316	116	163
ARID3B	-0.624522	3.36567	-4.7801	0.000125814	0.00170311	0.985677	336	353	207	227
ARID4A	0.182095	4.95993	2.17732	0.0420923	0.132617	-5.0966	764	811	796	944
ARID4B	0.0188869	4.84765	0.203755	0.840683	0.912311	-7.2604	807	736	673	853
ARID5A	0.200118	3.09253	1.21549	0.238874	0.425715	-5.97248	229	199	278	206
ARID5B	1.81507	1.67517	7.59697	3.28633e-07	1.25042e-05	6.67392	49	42	149	164
ARIH1	0.0499588	6.22851	0.823128	0.420515	0.612007	-7.30136	1891	2083	1999	1995
ARIH2	0.0234081	7.0192	0.471958	0.642262	0.787894	-7.69661	3502	3428	3486	3363
ARL1	0.100199	5.79497	1.53986	0.139869	0.299851	-6.37464	1500	1391	1413	1601
ARL10	-0.195052	1.78437	-0.856107	0.402469	0.595761	-5.9211	103	95	70	100
ARL13B	0.0179209	4.27849	0.183494	0.856329	0.921295	-7.08693	552	488	496	526
ARL14EP	-0.152747	4.94964	-1.80347	0.0869875	0.218552	-5.73817	929	829	707	831
ARL15	0.0957751	4.6283	1.09713	0.286116	0.480566	-6.6046	664	625	627	713
ARL16	-0.00994165	4.67608	-0.112926	0.911258	0.951539	-7.2235	700	682	612	725
ARL17A	1.15851	1.61093	4.35936	0.000328413	0.00364043	0.354688	61	49	94	150
ARL2	-0.0100084	4.76691	-0.124115	0.902511	0.947583	-7.24967	737	734	693	727
ARL2BP	-0.164381	5.25565	-2.35065	0.0295391	0.103885	-4.85519	1099	1079	927	962
ARL3	-0.102916	2.72263	-0.630229	0.535954	0.707381	-6.38514	190	178	150	184
ARL4A	-0.107237	6.07272	-1.81248	0.0855374	0.216389	-6.02372	1828	1936	1692	1703
ARL4D	-0.0465058	1.12708	-0.158715	0.875546	0.932693	-6.08342	66	53	71	44
ARL5A	0.0126343	6.77217	0.253549	0.802532	0.891431	-7.73114	2924	2939	2749	3003
ARL5B	-0.108369	5.4028	-1.50999	0.147283	0.309945	-6.31202	1245	1124	1013	1122
ARL6	-0.224162	1.80962	-0.962029	0.347963	0.543936	-5.83466	90	115	71	100
ARL6IP1	-0.138778	7.60905	-3.14357	0.00528642	0.030721	-3.72995	5460	5575	4907	4836
ARL6IP4	-0.870896	-0.331939	-2.20255	0.0400028	0.127936	-3.71389	30	27	13	17
ARL6IP5	-0.0994742	5.69967	-1.43272	0.167977	0.336715	-6.4994	1525	1377	1223	1411
ARL6IP6	0.0346967	4.67298	0.375717	0.711235	0.836383	-7.15567	645	713	708	645
ARL8A	0.0201419	2.96941	0.134653	0.894284	0.943337	-6.66012	196	223	201	211
ARL8B	-0.0843437	6.75849	-1.6529	0.114565	0.263161	-6.42075	3079	2927	2771	2735
ARMC1	-0.0531151	6.8001	-0.91547	0.37127	0.56578	-7.33956	2982	3137	2634	3111
ARMC10	0.139244	5.71755	2.06844	0.0522993	0.153835	-5.50155	1324	1376	1493	1400
ARMC2	-0.275016	0.905985	-0.894335	0.382187	0.576651	-5.64623	44	69	38	51
ARMC5	-0.0150883	4.67415	-0.170027	0.866763	0.927638	-7.21446	683	698	696	635
ARMC6	-0.0687707	7.38652	-1.48397	0.154004	0.318963	-6.785	4740	4493	4316	4240
ARMC7	0.237861	3.94712	2.18375	0.0415505	0.131377	-4.77482	375	389	454	423
ARMC8	0.0767084	6.82784	1.5995	0.125992	0.279672	-6.51481	2988	2971	2986	3123
ARMCX1	0.0173743	2.03768	0.0841045	0.933842	0.963964	-6.36335	100	120	98	118
ARMCX3	0.0574691	5.06086	0.732786	0.472517	0.655751	-7.06748	920	844	836	949
ARMCX4	-0.370524	1.24029	-1.40833	0.174979	0.345613	-5.18079	75	69	46	63
ARMCX5	-0.119855	3.93845	-1.00061	0.329426	0.525353	-6.48371	460	401	420	353
ARMCX6	0.144315	3.86423	1.283	0.214723	0.396756	-6.1453	381	364	419	383
ARNT	-0.0686433	5.70745	-1.09204	0.288292	0.483044	-6.9177	1421	1461	1331	1340
ARNTL2	0.196655	4.2902	2.06421	0.0527372	0.15462	-5.09787	491	493	518	579
ARPC1A	0.268437	6.04289	4.6773	0.000158898	0.00205738	0.0518035	1618	1618	1824	1966
ARPC1B	-0.298148	6.13509	-4.78402	0.000124699	0.00169231	0.277127	2087	2109	1729	1593
ARPC2	0.133404	7.01856	2.82894	0.0106313	0.0506222	-4.29943	3418	3253	3456	3656
ARPC3	0.0716386	6.94922	1.48738	0.153109	0.317745	-6.69997	3315	3179	3311	3322
ARPC4	0.0729844	5.82886	1.11001	0.280665	0.475078	-6.92967	1518	1466	1584	1471
ARPC5	0.0744778	6.35639	1.37161	0.185958	0.360241	-6.73684	2105	2197	2158	2244
ARPC5L	0.354358	6.12386	6.23453	5.1591e-06	0.000120289	3.51595	1641	1681	2054	2074
ARPP19	-0.0341666	7.3976	-0.687368	0.500048	0.678844	-7.63692	4416	4785	4159	4573
ARPP21	0.463897	1.42511	1.81833	0.0846063	0.214549	-4.64561	68	55	70	96
ARRB1	-0.236193	5.09059	-2.39884	0.0267232	0.0963029	-4.71551	1082	914	908	745
ARRB2	-0.311696	4.32586	-3.34218	0.00337655	0.0220436	-2.52074	611	592	455	487
ARRDC1	-0.0765457	4.16016	-0.740526	0.467917	0.652726	-6.78349	480	508	476	436
ARRDC2	-0.371991	6.10159	-5.88912	1.07795e-05	0.00022245	2.77003	2088	2118	1650	1514
ARRDC3	0.0514736	4.24934	0.533709	0.599651	0.757673	-6.94746	512	494	479	535
ARRDC4	-0.116976	4.12371	-1.13121	0.271861	0.466219	-6.40687	503	475	403	475
ARSA	0.161724	3.23583	1.17348	0.254916	0.44604	-6.0683	258	222	263	258
ARSB	-0.291604	4.58486	-3.36078	0.00323705	0.021369	-2.55644	698	732	554	581
ARSG	-0.122941	3.40175	-0.950942	0.35342	0.548938	-6.35441	285	309	249	281
ARSK	0.500891	2.91525	3.32328	0.00352442	0.0227174	-2.15074	179	162	232	237
ART4	-0.65625	0.278473	-1.92745	0.0688085	0.185705	-4.23591	42	39	28	22
ARV1	-0.0113505	5.91821	-0.182033	0.85746	0.922015	-7.56091	1718	1556	1520	1635
ARVCF	-0.37797	5.47767	-5.50479	2.48926e-05	0.000454071	2.06358	1388	1347	1046	1001
ASAH1	-0.144574	6.99476	-2.73238	0.0131259	0.0584008	-4.49559	3692	3535	2949	3417
ASAH2	-0.058196	0.126706	-0.162352	0.87272	0.931282	-5.82858	31	28	33	23
ASAH2B	0.0510278	2.74032	0.318366	0.753635	0.862453	-6.54218	173	180	164	192
ASAP1	0.0354072	7.94701	0.899844	0.379321	0.574072	-7.55661	6607	6525	6419	6663
ASB1	0.0581928	5.29839	0.784019	0.442568	0.632153	-7.09544	1078	1001	979	1127
ASB13	-0.243916	5.07042	-2.86364	0.00985117	0.0478254	-3.76997	949	1020	861	759
ASB16	0.139484	0.795698	0.399799	0.693706	0.825472	-5.92835	47	41	70	32
ASB16-AS1	0.0867861	2.30667	0.470629	0.643193	0.788201	-6.34096	122	136	134	132
ASB6	-0.13542	5.33431	-1.84939	0.0798156	0.206257	-5.7724	1142	1134	1046	971
ASB7	-0.0480914	3.85797	-0.434815	0.668531	0.806817	-6.86854	409	385	349	398
ASB8	-0.0352289	5.41994	-0.528071	0.603484	0.760003	-7.30138	1178	1156	1083	1131
ASCC1	0.0478721	4.80356	0.475879	0.639516	0.786617	-7.15094	760	721	638	863
ASCC2	-0.0703351	6.84112	-1.39102	0.180087	0.351945	-6.8103	3258	3072	2946	2913
ASCC3	0.111645	7.35406	2.49447	0.021861	0.0837403	-5.0431	4222	4258	4270	4640
ASF1A	-0.0321238	6.45282	-0.616619	0.544709	0.714603	-7.50174	2430	2342	2221	2315
ASF1B	-0.114825	6.13802	-1.8722	0.0764494	0.200185	-5.94047	2024	1923	1831	1715
ASH1L	-0.133342	5.99252	-2.19992	0.0402158	0.128396	-5.33114	1741	1853	1530	1654
ASH1L-AS1	0.300488	0.990255	0.977201	0.340589	0.53708	-5.59451	42	54	73	45
ASH2L	-0.0675754	7.68864	-1.60721	0.124284	0.277265	-6.6587	5611	5768	5148	5406
ASIC3	0.0500595	0.962919	0.17583	0.862264	0.924339	-6.03613	45	58	54	49
ASIC4	-3.92939	0.0575429	-9.08046	2.16981e-08	1.35457e-06	7.09558	98	121	7	6
ASL	0.126567	4.71357	1.48447	0.153873	0.318905	-6.14986	709	644	723	712
ASMTL	-0.0100298	5.00851	-0.119532	0.906093	0.948934	-7.32212	813	930	851	828
ASMTL-AS1	0.254183	1.76731	1.11769	0.277452	0.471968	-5.66721	79	88	108	87
ASNA1	0.182106	7.27805	4.1265	0.000560373	0.00560553	-1.45712	3955	3895	4215	4443
ASNS	0.118742	7.48185	2.76973	0.012101	0.0552043	-4.5063	4625	4616	4833	4920
ASNSD1	0.108128	6.4463	2.04833	0.0544123	0.158397	-5.70601	2227	2298	2330	2410
ASPH	0.250526	2.83245	1.63032	0.119285	0.27042	-5.33796	172	179	195	211
ASPHD2	-0.286047	0.472525	-0.856757	0.402118	0.595567	-5.5718	46	36	39	27
ASPM	-0.227252	7.56832	-4.61824	0.000181761	0.00229122	-0.375035	5543	5523	4249	4960
ASPRV1	0.239213	0.0584702	0.634016	0.533531	0.705603	-5.63373	29	22	37	23
ASPSCR1	-0.0407498	5.04887	-0.488642	0.630615	0.779797	-7.21689	886	921	906	806
ASRGL1	-0.0537713	2.8165	-0.329802	0.745111	0.856646	-6.56291	173	215	180	181
ASS1	0.00902969	3.54147	0.0715829	0.943672	0.970187	-6.85867	338	288	310	301
ASS1P12	-0.101621	0.996144	-0.353932	0.727237	0.844867	-5.99798	66	46	52	48
ASTE1	0.0716888	3.51792	0.591673	0.560954	0.726995	-6.6729	302	299	302	312
ASTN2	-0.0583872	1.75085	-0.264529	0.794183	0.88685	-6.2415	95	89	90	82
ASUN	0.25853	6.83275	5.36744	3.37072e-05	0.00057829	1.46177	2796	2818	3211	3317
ASXL1	0.0381159	6.78622	0.738556	0.469085	0.653674	-7.48526	3052	2819	2923	2933
ASXL2	-0.079676	6.90083	-1.66523	0.112057	0.259368	-6.42987	3314	3304	2934	3155
ATAD1	0.197898	6.20874	3.40076	0.00295606	0.0198844	-2.89565	1951	1773	2006	2143
ATAD2	-0.0240058	8.12996	-0.547835	0.590101	0.750121	-7.84462	7587	7634	6807	7767
ATAD2B	0.0313852	5.48026	0.460332	0.650435	0.793679	-7.35295	1176	1203	1115	1250
ATAD3A	0.0376259	7.25171	0.813805	0.425708	0.616735	-7.51396	4114	3989	4069	4016
ATAD3B	0.0700713	6.95144	1.23949	0.230062	0.415263	-7.02384	3192	3314	3466	3181
ATAD5	-0.128338	5.86461	-1.9732	0.0630035	0.174831	-5.70462	1614	1669	1353	1571
ATAT1	0.172599	4.14837	1.75683	0.0948408	0.231451	-5.56785	456	443	482	503
ATE1	0.0397487	5.61575	0.607835	0.5504	0.718402	-7.30847	1274	1332	1245	1359
ATF1	0.167879	5.92557	2.85378	0.0100671	0.0486829	-4.01851	1544	1545	1627	1747
ATF2	0.0990257	5.18242	1.34219	0.195149	0.372453	-6.47751	918	972	985	982
ATF3	-0.0511798	1.36719	-0.196601	0.8462	0.914842	-6.14396	66	75	54	80
ATF4	-0.0798973	8.38023	-1.98151	0.0619967	0.172849	-6.16018	9607	8862	8295	8679
ATF5	0.0113193	6.62671	0.210344	0.835609	0.909827	-7.71233	2635	2666	2653	2543
ATF6	-0.0469079	6.2876	-0.865966	0.397172	0.590852	-7.27768	2117	2160	1978	2046
ATF6B	-0.0132787	6.60029	-0.256662	0.800163	0.89012	-7.69554	2657	2593	2543	2514
ATF7	0.123668	4.41595	1.33973	0.195933	0.373211	-6.25166	536	565	589	577
ATF7IP	-0.284604	5.20793	-3.76207	0.00129439	0.0105959	-1.83213	1164	1036	869	884
ATF7IP2	0.35142	5.86883	5.81775	1.25756e-05	0.000250784	2.66264	1409	1378	1653	1805
ATG10	0.0618458	2.85791	0.383083	0.705855	0.832978	-6.55712	186	195	213	176
ATG12	-0.0342188	5.55196	-0.529688	0.602383	0.759546	-7.33693	1302	1255	1194	1233
ATG13	-0.0288364	6.12283	-0.494525	0.626531	0.777679	-7.49938	1850	1942	1809	1803
ATG14	-0.377929	5.10381	-4.90667	9.44836e-05	0.00134093	0.810485	1051	1061	733	849
ATG16L1	-0.0558604	5.37332	-0.818303	0.423197	0.614551	-7.08839	1123	1153	1051	1077
ATG16L2	-0.283393	3.07331	-1.97276	0.0630567	0.174841	-4.86745	249	250	207	192
ATG2A	-0.149068	6.0505	-2.47501	0.0227777	0.086349	-4.81973	1819	1942	1647	1648
ATG2B	-0.268688	6.26829	-4.78912	0.000123267	0.00167776	0.259969	2228	2331	1772	1906
ATG3	0.0767994	6.47823	1.39561	0.178721	0.349993	-6.73094	2444	2236	2386	2408
ATG4A	0.0139046	4.43034	0.130781	0.897306	0.944837	-7.14433	636	525	510	629
ATG4B	0.0936956	6.34268	1.76737	0.0930142	0.228473	-6.15683	2126	2106	2142	2248
ATG4C	0.0602136	4.89297	0.728901	0.474837	0.657645	-7.02122	749	819	805	783
ATG4D	-0.17234	4.87778	-2.14017	0.0453506	0.139343	-5.13959	833	847	740	710
ATG5	0.090436	5.94426	1.45835	0.160866	0.328134	-6.52645	1611	1602	1707	1621
ATG7	-0.0643623	4.67336	-0.771611	0.449712	0.637756	-6.92224	695	710	634	672
ATG9A	0.0825785	6.55327	1.54386	0.1389	0.298443	-6.5409	2474	2441	2571	2490
ATG9B	-0.0124596	4.10768	-0.124549	0.902171	0.947415	-7.04083	478	454	445	453
ATHL1	-0.0681097	3.03772	-0.476048	0.639398	0.786617	-6.5753	223	229	208	211
ATIC	0.045265	7.73853	1.09263	0.288041	0.482755	-7.33174	5785	5543	5601	5759
ATL1	0.618207	0.534524	1.97521	0.0627583	0.174463	-4.207	32	30	47	46
ATL2	-0.0963998	6.14525	-1.68859	0.10743	0.251919	-6.23658	1945	1998	1715	1871
ATL3	0.0749065	7.00805	1.58536	0.129173	0.284542	-6.57044	3404	3353	3319	3602
ATM	-0.0390179	7.57024	-0.815903	0.424535	0.615755	-7.56839	5032	5353	4647	5182
ATMIN	0.120212	5.8866	2.01016	0.0586356	0.166434	-5.64673	1523	1533	1614	1615
ATN1	-0.374103	6.06273	-6.48773	3.03522e-06	7.60583e-05	4.07256	2105	1995	1515	1559
ATOX1	0.150294	3.9471	1.42094	0.171329	0.341228	-5.99485	406	382	423	427
ATP11A	-0.264545	6.646	-4.49181	0.000242542	0.0028614	-0.498735	2800	3121	2410	2374
ATP11B	0.0404816	7.46633	0.792501	0.437725	0.628274	-7.56971	4849	4552	4352	5062
ATP11C	-0.120827	5.90185	-1.96749	0.063703	0.176181	-5.7238	1725	1635	1422	1583
ATP13A1	0.0988275	7.6947	2.34329	0.0299927	0.104945	-5.39574	5401	5383	5616	5610
ATP13A2	0.187135	4.54512	1.96302	0.0642563	0.177198	-5.35267	553	628	605	701
ATP13A3	-0.10491	8.34017	-2.54759	0.0195319	0.0774096	-5.09345	9130	8979	7708	8680
ATP1A1	-0.0917436	8.60809	-2.34132	0.0301152	0.105284	-5.53511	10656	11047	9942	9851
ATP1B2	-1.98239	4.1562	-18.0197	1.63284e-13	9.64467e-11	20.8146	959	950	224	245
ATP1B3	0.00644385	6.60842	0.121478	0.904572	0.948141	-7.72401	2541	2706	2517	2603
ATP2A1	-0.0899293	1.07346	-0.315489	0.755785	0.863794	-6.03161	48	70	56	50
ATP2A2	-0.0208726	8.21835	-0.534107	0.599381	0.757409	-7.86539	7954	8210	7591	7893
ATP2B1	0.0226127	5.2095	0.297581	0.76921	0.871828	-7.34119	997	981	900	1057
ATP2B4	-0.242589	7.61914	-5.35614	3.45619e-05	0.000590504	1.29948	5673	5851	4483	4992
ATP2C1	0.161181	7.08754	3.40198	0.00294784	0.0198507	-3.06847	3508	3422	3591	3946
ATP5A1	0.103169	10.0504	3.40727	0.00291258	0.0197095	-3.49358	27926	27199	28604	28946
ATP5B	0.101998	10.3664	3.63341	0.00173836	0.0132693	-3.02871	34514	34139	34937	36691
ATP5C1	0.0560222	7.7455	1.35921	0.189791	0.365326	-7.01467	5711	5627	5696	5761
ATP5D	0.12929	7.33153	2.92735	0.00855986	0.0431568	-4.1484	4151	4145	4381	4439
ATP5E	0.207238	6.02162	2.01337	0.0582694	0.16566	-5.67296	1611	1650	1493	2230
ATP5F1	0.118526	8.04222	2.87801	0.00954458	0.0467394	-4.36924	6651	6983	7037	7346
ATP5G1	0.130445	7.02281	2.72695	0.0132815	0.0589423	-4.51251	3420	3276	3566	3558
ATP5G2	0.0710982	7.4469	1.62223	0.121016	0.272881	-6.59538	4523	4649	4548	4818
ATP5G3	0.167211	8.19464	4.1095	0.000582689	0.00575452	-1.64294	7437	7460	7719	8555
ATP5H	0.0983187	5.9499	1.45331	0.162245	0.329862	-6.53476	1743	1485	1619	1731
ATP5I	0.393565	4.20552	2.19674	0.0404755	0.129027	-4.83028	427	442	398	764
ATP5J	0.16746	6.72076	2.79104	0.011551	0.0537322	-4.32124	2786	2581	2681	3191
ATP5J2	0.315019	6.44087	4.39014	0.000306057	0.00343249	-0.691691	2039	2161	2251	2854
ATP5L	0.24376	6.6131	4.19157	0.00048258	0.00495523	-1.1832	2524	2327	2591	2999
ATP5O	0.0101284	6.5602	0.198473	0.844756	0.914262	-7.70117	2530	2535	2459	2499
ATP5S	-0.213025	4.67242	-2.48249	0.0224213	0.0852848	-4.43173	759	719	633	607
ATP5SL	-0.043858	6.19613	-0.78019	0.444765	0.633904	-7.32897	2014	1995	1904	1877
ATP6AP1	-0.00551851	6.35922	-0.0988371	0.922289	0.957569	-7.67427	2166	2265	2159	2131
ATP6AP2	0.0782987	6.08005	1.34199	0.195213	0.372453	-6.71374	1732	1815	1813	1826
ATP6V0A1	0.0501082	6.69325	1.01093	0.324585	0.522064	-7.22628	2751	2727	2733	2780
ATP6V0A2	-0.425841	6.06431	-6.90882	1.27998e-06	3.81657e-05	4.95685	2083	2093	1563	1462
ATP6V0B	0.184368	6.17119	2.95416	0.00806668	0.0413332	-3.8624	1779	1862	2083	1942
ATP6V0C	-0.359511	3.62885	-1.95811	0.0648683	0.178172	-5.06751	401	352	385	213
ATP6V0D1	-0.0757654	6.86572	-1.5659	0.133662	0.290408	-6.57138	3255	3194	2968	2980
ATP6V0E1	-0.0154279	5.91232	-0.260659	0.797123	0.888526	-7.54125	1619	1642	1558	1578
ATP6V0E2	-0.241599	1.57514	-1.01276	0.323734	0.521168	-5.718	80	94	77	66
ATP6V1A	0.150199	6.6988	2.42624	0.0252356	0.0925553	-5.05409	2562	2756	2619	3130
ATP6V1B2	-0.0482135	7.81959	-1.17321	0.255022	0.446163	-7.25478	6295	6081	5784	5849
ATP6V1C1	-0.0490274	8.24878	-1.29994	0.208971	0.389118	-7.16761	8407	8262	7624	8039
ATP6V1C2	0.146846	-0.106708	0.370502	0.715053	0.837933	-5.72199	18	30	30	21
ATP6V1D	-0.042495	4.92166	-0.492488	0.627944	0.778123	-7.17764	870	787	823	743
ATP6V1E1	-0.00195838	5.93523	-0.0323297	0.974542	0.986048	-7.58191	1605	1694	1592	1609
ATP6V1E2	-0.101525	2.59732	-0.610435	0.548712	0.7172	-6.35722	176	161	150	155
ATP6V1F	0.248706	5.37207	3.5823	0.001954	0.0146096	-2.28334	994	1053	1159	1204
ATP6V1G1	0.147505	5.81442	2.20853	0.0395215	0.127191	-5.27236	1375	1509	1464	1640
ATP6V1H	0.112292	5.82157	1.68996	0.107164	0.251432	-6.15749	1515	1415	1593	1488
ATP7A	-0.135001	5.64768	-1.91416	0.070582	0.188848	-5.74966	1413	1418	1142	1371
ATP7B	-0.0630262	8.11763	-1.60535	0.124694	0.277785	-6.72851	7605	7688	7071	7158
ATP8A1	-0.0469997	0.258408	-0.133933	0.894846	0.943582	-5.86392	40	26	27	34
ATP8B2	-1.62642	3.56984	-12.5049	1.0828e-10	2.00464e-08	14.6285	552	571	179	174
ATP8B3	-0.19572	5.07216	-2.50209	0.0215117	0.0828154	-4.50905	924	1017	813	832
ATP9A	-0.187414	1.38546	-0.691142	0.497726	0.677375	-5.93053	60	93	56	72
ATP9B	-0.173663	4.86108	-2.19591	0.0405435	0.129081	-5.03313	820	842	708	724
ATPAF1	-0.035747	6.27004	-0.626899	0.538089	0.709219	-7.45574	2135	2073	2034	1958
ATPAF2	-0.205625	4.9546	-2.5057	0.021348	0.0823181	-4.46838	958	839	728	784
ATPIF1	0.0113766	6.63342	0.205022	0.839707	0.911741	-7.71488	2705	2624	2426	2804
ATR	0.0375894	6.37705	0.690111	0.49836	0.677795	-7.43635	2228	2192	2094	2319
ATRAID	0.0646692	4.94263	0.832244	0.415475	0.607891	-6.95387	799	820	825	821
ATRIP	0.317567	4.88118	4.02448	0.000708412	0.00665108	-1.14718	715	706	864	858
ATRN	-0.038007	6.23374	-0.670388	0.510573	0.686668	-7.41873	2013	2096	1859	2032
ATRX	-0.0772762	6.26436	-1.23805	0.230583	0.415819	-6.88463	2113	2142	1793	2138
ATXN1	-0.754488	1.07146	-2.75936	0.0123774	0.0560362	-2.90387	75	71	45	39
ATXN10	0.0865291	7.3067	1.91546	0.0704077	0.188615	-6.10231	4119	4157	4274	4268
ATXN1L	-0.126072	6.03761	-2.20433	0.0398593	0.127624	-5.33372	1866	1830	1635	1657
ATXN2	0.16454	5.79166	2.6959	0.0142064	0.061787	-4.31353	1395	1423	1522	1548
ATXN2L	-0.0178715	7.86243	-0.416702	0.681505	0.816122	-7.86918	6313	6300	6136	5976
ATXN3	0.0404537	4.48916	0.449304	0.658229	0.799357	-7.06692	615	578	564	629
ATXN7	-0.202812	5.27365	-2.41386	0.0258979	0.0940703	-4.73793	1113	1124	832	1068
ATXN7L1	-0.254828	4.24731	-2.66094	0.0153209	0.0652387	-3.94576	566	551	436	474
ATXN7L2	-0.0268641	4.20448	-0.257515	0.799513	0.889831	-7.04591	491	510	509	449
ATXN7L3	-0.185802	6.39026	-3.14191	0.00530614	0.0307845	-3.50449	2427	2390	2142	1980
ATXN7L3B	-0.0216679	6.41823	-0.40695	0.688533	0.821524	-7.60545	2305	2336	2220	2224
AUH	-0.0576722	3.96507	-0.512034	0.614451	0.768164	-6.86611	461	399	368	435
AUNIP	-0.146768	4.19342	-1.46002	0.160411	0.327476	-6.02043	545	492	462	448
AUP1	0.131891	7.35985	2.82228	0.0107878	0.0511708	-4.37528	4300	4153	4568	4437
AURKA	-0.0595752	6.98131	-1.17933	0.252634	0.443069	-7.1004	3619	3334	3248	3233
AURKAIP1	0.12445	6.60527	2.44277	0.0243762	0.090348	-5.00304	2547	2477	2561	2764
AURKB	0.146832	6.83132	2.95288	0.00808945	0.0414121	-4.00149	2909	2920	3158	3116
AURKC	0.211665	4.44904	2.27436	0.0345643	0.116031	-4.76478	524	570	582	649
AVEN	-0.156096	4.09767	-1.48563	0.15357	0.318488	-5.95429	489	483	447	403
AVIL	-0.198751	1.30773	-0.790533	0.438846	0.628966	-5.83697	68	74	60	60
AVL9	-0.03456	5.90286	-0.579644	0.568876	0.733431	-7.3997	1635	1627	1481	1616
AVPI1	-0.0912965	2.79849	-0.585042	0.565314	0.730666	-6.43761	187	199	177	175
AXIN1	0.122419	6.00985	2.0545	0.0537559	0.157002	-5.59853	1724	1604	1759	1761
AXL	-2.73836	3.82333	-20.1885	2.03376e-14	2.52267e-11	22.1319	1020	950	142	144
AZI1	-0.190778	4.55162	-1.90099	0.07238	0.192207	-5.45864	657	691	628	526
AZI2	-0.0613138	4.57246	-0.688074	0.499613	0.678681	-6.95317	691	619	608	611
AZIN1	-0.220899	9.11787	-6.30937	4.40656e-06	0.000104112	3.19413	16360	15959	12903	14066
AZU1	-1.12689	1.0744	-4.06943	0.000638882	0.00616831	-0.229984	88	79	33	41
B2M	0.069506	7.91473	1.6277	0.119845	0.271268	-6.66426	6606	6094	6359	6586
B3GALNT1	-0.899213	0.297714	-2.46087	0.0234664	0.0882504	-3.3469	49	41	16	33
B3GALNT2	0.146594	4.49096	1.5089	0.147562	0.310221	-6.04728	558	594	559	684
B3GALT6	0.0513314	5.6794	0.764796	0.453666	0.64092	-7.21536	1390	1321	1408	1325
B3GALTL	-0.581987	2.37822	-2.72012	0.01348	0.0595837	-3.26508	206	142	92	133
B3GAT3	0.244345	4.5771	2.71392	0.0136623	0.0601801	-3.93916	596	584	706	655
B3GNT1	0.405208	3.38109	3.16203	0.00507174	0.029801	-2.63144	238	249	303	324
B3GNT2	-0.168685	4.87098	-2.09972	0.0491585	0.147392	-5.21036	871	801	698	747
B3GNT5	-0.159519	5.26008	-1.80286	0.0870868	0.218615	-5.82743	1140	1045	829	1084
B3GNT9	-0.682859	1.03719	-2.38855	0.0273029	0.0979083	-3.59336	63	77	35	50
B3GNTL1	-0.26825	3.03671	-1.78232	0.0904755	0.224159	-5.16827	252	233	173	220
B4GALT1	-0.334383	5.39989	-4.85128	0.000107081	0.00148406	0.607198	1246	1308	970	998
B4GALT2	0.0606902	6.38173	0.999532	0.329935	0.525624	-7.17306	2278	2121	2315	2148
B4GALT3	0.281672	5.32618	4.01926	0.00071696	0.0067169	-1.27943	970	990	1104	1213
B4GALT4	-0.00414157	2.96024	-0.0282123	0.977783	0.987817	-6.66601	206	213	198	208
B4GALT5	-0.213514	5.03181	-2.65517	0.0155127	0.0656496	-4.19055	902	997	802	788
B4GALT7	0.059817	4.48632	0.657153	0.518862	0.694204	-6.94771	612	570	611	587
B9D1	0.0752823	3.99293	0.723944	0.477805	0.659627	-6.74157	410	425	414	441
B9D2	-0.184793	2.78217	-1.18147	0.251805	0.442092	-5.91103	199	195	171	166
BABAM1	0.140612	5.36942	2.06208	0.0529588	0.155039	-5.41917	1069	1051	1133	1139
BACE1	0.281602	2.57892	1.69101	0.106961	0.251277	-5.16892	148	143	169	175
BACH1	-0.281811	6.31783	-5.04832	6.86811e-05	0.00103514	0.841046	2454	2286	1888	1900
BAD	0.0879435	2.68386	0.544973	0.59203	0.751844	-6.42387	163	172	167	179
BAG1	0.127276	6.86276	2.66922	0.0150498	0.0644381	-4.60071	3030	2969	3130	3239
BAG2	0.2693	6.91032	5.16846	5.24761e-05	0.000830247	0.997617	3093	2816	3304	3616
BAG3	0.224737	5.97133	3.89347	0.000957266	0.00836806	-1.72956	1572	1554	1740	1811
BAG4	0.188172	5.61132	2.81043	0.0110713	0.0522196	-4.03008	1184	1285	1323	1409
BAG5	-0.244533	5.98151	-4.08267	0.000619733	0.00603862	-1.29813	1924	1783	1473	1567
BAG6	0.0348434	8.74662	0.831136	0.416086	0.608337	-7.7321	11371	11488	11703	11073
BAHD1	-0.15536	6.13594	-2.72382	0.0133721	0.0592597	-4.3374	2027	1970	1756	1733
BAIAP2	-1.3735	3.87364	-11.1797	7.29353e-10	8.73819e-08	12.8617	688	586	234	242
BAIAP2-AS1	-1.18097	1.52145	-4.84328	0.000109038	0.00150949	1.38294	111	121	52	47
BAIAP2L2	0.233362	2.80879	1.42167	0.171118	0.34108	-5.62348	180	167	218	181
BAK1	0.0984651	4.7717	1.14682	0.265508	0.458493	-6.59336	670	754	727	752
BANF1	-0.0584891	7.13598	-1.11156	0.280016	0.474433	-7.20575	4055	3687	3395	3833
BANP	0.522347	4.39597	5.25355	4.34051e-05	0.000711225	1.7808	464	481	698	625
BAP1	-0.0891784	7.61659	-2.01453	0.0581373	0.165468	-5.98565	5497	5406	5046	4919
BARD1	-0.0387687	4.90369	-0.492682	0.627809	0.778123	-7.17223	816	818	734	813
BAX	-0.0131569	6.28904	-0.243599	0.810118	0.895625	-7.63305	2157	2075	1990	2086
BAZ1A	-0.00394535	7.42687	-0.0891689	0.929869	0.961986	-7.88315	4778	4508	4400	4599
BAZ1B	0.045653	7.88752	1.11703	0.27773	0.471968	-7.32883	6250	6308	6058	6546
BAZ2A	-0.148645	7.17763	-3.20114	0.00464451	0.0279391	-3.52881	4026	4187	3526	3674
BAZ2B	0.0328533	3.98307	0.296915	0.769711	0.871838	-6.96223	391	453	399	438
BBC3	-0.139708	4.21764	-1.38479	0.181955	0.355092	-6.1293	554	498	476	452
BBIP1	-0.225678	2.86543	-1.47756	0.155697	0.321546	-5.56524	222	202	172	180
BBS10	0.0166497	3.50893	0.136346	0.892963	0.942601	-6.84067	309	300	286	313
BBS12	-0.00946549	2.34673	-0.0516753	0.95932	0.97865	-6.46551	143	131	139	126
BBS2	-0.182724	3.969	-1.74865	0.0962795	0.233754	-5.52244	449	449	371	398
BBS4	-0.171802	4.6437	-1.81828	0.0846156	0.214549	-5.62327	692	736	660	576
BBS5	-0.259484	2.3377	-1.43756	0.166613	0.334954	-5.45493	149	148	117	124
BBS7	-0.0297479	3.76679	-0.23263	0.818504	0.900375	-6.90814	408	336	312	397
BBS9	0.354451	1.66663	1.54168	0.139427	0.299207	-5.11661	68	83	95	92
BBX	-0.0472158	5.88992	-0.754726	0.459546	0.645327	-7.27669	1573	1676	1457	1599
BCAP29	-0.053215	5.94279	-0.788877	0.439791	0.629854	-7.26291	1640	1738	1449	1722
BCAP31	0.171931	6.95934	3.39798	0.00297475	0.0199669	-3.0535	3207	3108	3526	3392
BCAR1	-0.140798	6.29776	-2.44699	0.0241613	0.090026	-4.93011	2289	2161	1999	1925
BCAR3	-0.585245	0.123581	-1.64381	0.116447	0.265922	-4.62423	33	38	26	20
BCAS2	0.153552	5.87244	2.59204	0.0177646	0.0724367	-4.54473	1517	1475	1582	1653
BCAS3	0.101674	2.53753	0.603328	0.553332	0.72015	-6.34286	152	149	153	161
BCAT1	-0.0170501	8.4754	-0.432374	0.670274	0.807397	-7.95327	9756	9536	8784	9765
BCAT2	-0.0699112	6.24565	-1.14132	0.267733	0.461309	-6.99298	2002	2189	1967	1911
BCCIP	0.0563778	7.2643	1.12138	0.275917	0.470315	-7.21848	4294	3839	4071	4138
BCDIN3D	0.767859	2.16239	3.95697	0.000827307	0.00752339	-0.590654	96	88	148	157
BCKDHB	-0.0392798	5.5067	-0.583992	0.566006	0.73125	-7.29334	1288	1196	1129	1220
BCKDK	-0.0206126	5.63148	-0.310108	0.75981	0.866319	-7.45428	1345	1343	1322	1256
BCL10	-0.00803047	3.9326	-0.0708714	0.944231	0.970521	-6.98883	402	423	358	442
BCL11A	0.121331	4.86433	1.49266	0.151732	0.315968	-6.18335	728	777	757	834
BCL2	0.0758342	1.74307	0.310997	0.759145	0.866272	-6.22577	109	70	80	100
BCL2L1	0.00564603	7.05249	0.120596	0.905261	0.948329	-7.8115	3629	3508	3467	3497
BCL2L11	0.196119	6.29951	3.34653	0.00334344	0.0218909	-3.03577	2096	1874	2132	2284
BCL2L12	0.0690836	6.45394	1.32336	0.201216	0.37966	-6.81989	2310	2300	2336	2365
BCL2L13	-0.098253	6.07277	-1.74219	0.0974289	0.23576	-6.13635	1880	1871	1677	1729
BCL2L2	0.0104595	4.28604	0.106693	0.916136	0.953735	-7.10098	533	514	472	555
BCL3	-2.72139	0.0367223	-7.01284	1.03792e-06	3.23477e-05	4.77094	71	70	9	11
BCL7A	-0.111972	5.84657	-1.87816	0.07559	0.19848	-5.86116	1609	1613	1416	1482
BCL7B	-0.0261498	5.14877	-0.3315	0.743848	0.856008	-7.31264	985	942	965	878
BCL7C	-0.0397909	4.71712	-0.471362	0.642679	0.788146	-7.12694	744	693	643	716
BCL9	-0.169795	3.4461	-1.23307	0.232394	0.417814	-6.06751	277	349	269	268
BCL9L	-0.510647	2.9231	-3.39627	0.00298638	0.0200233	-1.99258	239	248	158	174
BCLAF1	-0.174741	8.9779	-4.95648	8.44426e-05	0.00122078	0.196793	14426	14437	11932	12935
BCOR	-0.182407	6.52693	-3.4256	0.00279364	0.0191766	-2.90675	2612	2681	2159	2377
BCORL1	-0.0996915	4.25767	-0.996893	0.331182	0.526732	-6.5911	555	511	503	465
BCR	-0.0989614	6.06606	-1.50892	0.147555	0.310221	-6.48439	1958	1779	1761	1632
BCRP3	-1.26095	0.7268	-4.16389	0.000514247	0.00522417	-0.0347349	68	69	28	27
BCS1L	0.0753126	6.29926	1.38093	0.183122	0.356417	-6.71216	2035	2098	2092	2140
BDH1	0.236555	5.69018	3.70547	0.00147381	0.0116962	-2.08851	1246	1317	1432	1502
BDH2	-0.0380136	1.78642	-0.160471	0.874182	0.93204	-6.27485	80	110	76	103
BDP1	-0.193452	7.01566	-3.60577	0.00185184	0.0139467	-2.59725	3689	3768	2929	3423
BECN1	-0.137721	5.49136	-2.10288	0.0488511	0.146719	-5.37941	1278	1263	1107	1138
BEGAIN	-1.05155	1.5115	-4.33122	0.000350288	0.0038248	0.301101	109	111	55	48
BEND3	-0.035502	5.17649	-0.422192	0.677562	0.813357	-7.28496	1034	941	839	1040
BET1	-0.0471342	4.03857	-0.413947	0.683488	0.817786	-6.93713	455	445	370	482
BET1L	-0.022742	5.40204	-0.309826	0.760021	0.866415	-7.39135	1159	1135	1148	1051
BEX4	-0.684083	1.18084	-2.56662	0.0187558	0.0753366	-3.29135	82	72	50	43
BFAR	0.111079	6.17405	2.00094	0.0596994	0.168528	-5.73016	1912	1831	1930	1999
BFSP1	-0.0249111	1.31302	-0.0997372	0.921584	0.957157	-6.14302	67	67	64	64
BHLHE40	-0.302634	2.32361	-1.50901	0.147534	0.310221	-5.35316	152	146	140	99
BICD1	0.575293	2.38553	3.06732	0.0062709	0.0345554	-2.55787	104	127	152	182
BICD2	0.238475	5.68676	3.84002	0.0010823	0.00926825	-1.78215	1278	1276	1437	1492
BID	-0.0403814	5.14561	-0.473319	0.641308	0.787684	-7.25241	887	1053	925	902
BIK	-0.2719	2.39335	-1.41459	0.173157	0.343435	-5.5023	147	163	143	109
BIN1	-3.66642	-1.3119	-7.11117	8.52487e-07	2.7827e-05	4.1142	31	47	3	2
BIN2	-0.710074	3.89866	-6.52863	2.78815e-06	7.16029e-05	4.66407	516	511	292	318
BIN3	-0.154663	4.49074	-1.75877	0.0945013	0.230934	-5.67193	644	633	547	568
BIRC2	0.113282	5.05243	1.47357	0.156761	0.323096	-6.26483	879	840	849	960
BIRC5	-0.190558	5.81039	-2.75508	0.0124936	0.0563119	-4.19526	1656	1572	1449	1306
BIRC6	-0.117653	7.49924	-2.4994	0.0216344	0.0831845	-5.05843	5042	5113	4266	4844
BIVM	0.0767435	4.71773	0.890198	0.384349	0.578997	-6.83663	666	715	664	752
BLCAP	0.281542	5.16243	3.68208	0.00155496	0.0121766	-2.00187	930	822	1028	1039
BLM	-0.0993424	6.17491	-1.74964	0.0961028	0.233393	-6.14775	1990	2039	1746	1911
BLMH	-0.00777513	6.93849	-0.165036	0.870636	0.929858	-7.78315	3311	3314	3159	3246
BLOC1S1	-0.132069	2.48994	-0.766821	0.452489	0.640025	-6.21452	153	163	138	142
BLOC1S2	-0.305401	4.70391	-3.51581	0.0022745	0.0165181	-2.2462	793	768	565	665
BLOC1S3	0.286375	4.7818	3.1676	0.00500857	0.0295558	-3.03836	620	725	807	783
BLOC1S4	0.182163	3.69374	1.40272	0.176621	0.347638	-5.93623	370	288	376	346
BLOC1S5	0.100154	4.70268	1.20558	0.242587	0.429988	-6.50514	689	665	707	704
BLOC1S6	0.0345325	6.56574	0.589763	0.562208	0.728013	-7.54201	2434	2613	2341	2688
BLVRA	-0.400594	6.19866	-6.91695	1.25911e-06	3.77246e-05	4.94565	2362	2186	1672	1675
BLVRB	-0.181928	8.19879	-4.20938	0.000463241	0.00480037	-1.41351	8737	8135	6842	7621
BLZF1	0.0493962	4.68639	0.5834	0.566397	0.731451	-7.05686	713	651	668	703
BMI1	-0.0301258	6.08752	-0.522754	0.607109	0.762591	-7.47632	1812	1890	1740	1783
BMP1	-0.280728	4.80911	-3.19502	0.00470896	0.0282447	-2.98532	801	863	698	635
BMP2K	-0.114424	5.96999	-1.8691	0.0768993	0.200812	-5.90646	1806	1707	1605	1550
BMP8B	0.139292	3.37019	1.00831	0.325812	0.522702	-6.28887	288	244	255	315
BMPR1A	0.202961	4.93219	2.58092	0.0181919	0.0736462	-4.31317	786	747	814	902
BMPR2	0.246731	5.68524	3.82144	0.00112947	0.00956314	-1.82397	1255	1290	1391	1546
BMS1	0.0601944	7.37019	1.38045	0.183268	0.356645	-6.9229	4369	4360	4289	4559
BMS1P1	-0.717014	-0.0668536	-1.95496	0.0652636	0.178984	-4.13894	34	31	19	19
BMS1P4	-0.150651	1.4834	-0.630781	0.535601	0.707141	-5.99791	84	74	68	70
BMS1P5	-0.228027	1.54385	-0.862423	0.39907	0.592609	-5.84526	96	74	88	56
BNIP1	0.188727	3.74726	1.62684	0.120028	0.271485	-5.63807	320	358	360	390
BNIP2	-0.120108	6.50924	-2.29361	0.0332264	0.112699	-5.27005	2617	2500	2203	2374
BNIP3	0.25287	5.26931	3.46169	0.00257327	0.0180129	-2.5259	1004	901	1086	1118
BNIP3L	0.0229014	7.98643	0.572585	0.573553	0.73696	-7.80855	6898	6659	6466	6925
BOD1	0.607816	3.98273	5.40542	3.09908e-05	0.000538389	2.22657	324	366	530	492
BOD1L1	-0.221437	6.34563	-4.06318	0.00064812	0.00622735	-1.423	2349	2382	1884	2062
BOK	-1.3175	2.40367	-6.99354	1.07898e-06	3.34591e-05	5.73911	233	216	93	82
BOLA1	0.22078	3.65399	1.87865	0.0755207	0.198466	-5.21208	316	311	363	348
BOLA3	0.26141	5.05039	2.85038	0.0101427	0.0489722	-3.79296	857	776	837	1075
BOLA3-AS1	-0.102498	3.59147	-0.844046	0.409009	0.601542	-6.51332	354	319	287	322
BOP1	0.272918	5.46336	3.46196	0.00257166	0.0180129	-2.57703	1156	1009	1332	1211
BORA	-0.129487	5.16389	-1.77716	0.0913443	0.22548	-5.84194	997	1022	897	897
BPGM	-0.0172969	4.49401	-0.192919	0.849043	0.916707	-7.15397	599	622	556	617
BPHL	-0.0964213	3.28176	-0.728645	0.474989	0.657741	-6.50171	268	273	233	259
BPNT1	0.350922	4.82961	4.36038	0.000327644	0.00363515	-0.365216	688	668	801	881
BPTF	-0.0137155	7.17561	-0.272128	0.788421	0.884173	-7.80321	3978	3850	3514	4035
BRAF	-0.0859383	5.08634	-1.05216	0.305752	0.50166	-6.78797	992	896	793	938
BRAP	0.00356768	5.53966	0.0526463	0.958556	0.978032	-7.4783	1258	1245	1141	1301
BRAT1	0.132414	6.26892	2.06071	0.0531026	0.155387	-5.64613	2081	1889	2203	2029
BRCA1	-0.094556	6.6602	-1.72254	0.100998	0.24185	-6.29347	2709	2926	2450	2678
BRCA2	0.0368577	6.02313	0.633847	0.53364	0.705603	-7.39519	1732	1727	1647	1804
BRCC3	-0.0171742	4.90922	-0.215574	0.831587	0.907771	-7.27596	819	808	799	765
BRD1	0.066203	5.88932	1.10023	0.2848	0.479526	-6.95543	1539	1581	1585	1590
BRD2	0.00795194	8.40624	0.202559	0.841605	0.912523	-8.01975	8967	9261	8902	8911
BRD3	0.229259	5.60984	3.50512	0.0023307	0.0167886	-2.5195	1263	1168	1338	1431
BRD4	0.047395	8.01916	1.1801	0.252337	0.442713	-7.27796	6912	6835	6910	6899
BRD7	0.121433	6.30905	2.27059	0.0348316	0.116654	-5.27153	2073	2022	2124	2206
BRD7P2	0.694697	-0.277341	1.80117	0.0873601	0.219133	-4.33746	18	16	26	28
BRD8	0.0062395	6.36616	0.114742	0.909838	0.950689	-7.674	2180	2254	2158	2170
BRD9	-0.0741612	6.3414	-1.35352	0.191568	0.36735	-6.7569	2189	2294	2018	2120
BRE	-0.036704	3.8937	-0.296975	0.769666	0.871838	-6.93264	365	449	406	363
BRF1	-0.0154945	5.51884	-0.209896	0.835954	0.90984	-7.45099	1237	1244	1262	1130
BRF2	0.0860783	4.32998	0.852983	0.404156	0.597278	-6.7479	518	532	578	509
BRI3	0.14198	4.16375	1.35645	0.190651	0.366312	-6.14965	461	458	445	544
BRI3BP	0.0678256	6.34507	1.25313	0.225166	0.409432	-6.8842	2110	2168	2103	2256
BRICD5	0.706551	0.857979	2.3272	0.0310063	0.107311	-3.67161	31	46	53	68
BRIP1	-0.145183	4.66984	-1.4259	0.16991	0.339601	-6.21612	656	793	575	696
BRIX1	-0.122318	6.49527	-2.27029	0.0348534	0.116654	-5.31111	2464	2608	2232	2295
BRK1	0.0447466	6.25936	0.765703	0.453139	0.640527	-7.3545	2031	2033	1901	2180
BRMS1	0.122729	5.63041	1.77967	0.0909208	0.224738	-5.96691	1321	1238	1255	1457
BRMS1L	-0.131339	3.2587	-0.973555	0.342352	0.538452	-6.28535	269	270	221	258
BROX	0.0631109	5.29281	0.774412	0.448094	0.636211	-7.10147	961	1111	976	1125
BRPF1	-0.117848	5.58357	-1.79445	0.0884601	0.221043	-5.93027	1388	1303	1206	1204
BRPF3	-0.0690111	5.7607	-1.05384	0.305003	0.501221	-6.97213	1559	1435	1306	1469
BRWD1	-0.0792786	6.82498	-1.36232	0.188822	0.364197	-6.84484	3093	3188	2640	3155
BRWD3	0.0557106	5.63467	0.828624	0.417472	0.609603	-7.15172	1292	1334	1239	1417
BSCL2	-0.0853905	0.414904	-0.262985	0.795356	0.887513	-5.87686	35	38	36	31
BSDC1	-0.1456	6.47463	-2.51482	0.0209395	0.0811983	-4.83374	2451	2588	2272	2157
BSG	-0.271752	9.77947	-8.5392	5.65939e-08	2.9372e-06	7.60114	26333	25691	20914	20970
BSN	-0.426156	1.55362	-1.67017	0.111063	0.257684	-4.90139	89	93	82	53
BSPRY	-0.575385	3.33689	-3.93177	0.000876627	0.00784537	-0.914927	321	344	182	256
BST2	0.0965242	6.58147	1.82321	0.0838372	0.213229	-6.11667	2553	2438	2463	2727
BTAF1	-0.274525	6.97576	-5.55341	2.2371e-05	0.00041287	1.85341	3805	3655	2839	3160
BTBD1	0.0591297	6.66265	1.14203	0.267446	0.46091	-7.0804	2709	2639	2569	2851
BTBD10	-0.0618218	4.5153	-0.654011	0.520841	0.696026	-6.95868	586	675	581	590
BTBD2	-0.059581	5.76821	-0.956798	0.35053	0.546572	-7.07134	1538	1459	1399	1396
BTBD3	-0.0364732	4.90553	-0.461448	0.649648	0.793679	-7.18821	847	788	772	777
BTBD6	0.168409	4.89582	1.89355	0.0734131	0.19412	-5.575	806	708	870	785
BTBD7	0.00705986	5.80999	0.112494	0.911597	0.951725	-7.5447	1458	1558	1449	1495
BTBD9	-0.0680259	1.95747	-0.297302	0.76942	0.871838	-6.29626	102	111	121	81
BTD	0.0775511	3.26584	0.528008	0.603527	0.760003	-6.62518	276	229	282	237
BTF3	0.114293	8.76026	3.19883	0.00466875	0.0280306	-3.77929	11147	11308	11465	12165
BTF3L4	-0.116264	6.03602	-2.03002	0.0564033	0.16199	-5.64729	1824	1856	1608	1692
BTF3L4P2	0.204568	2.03778	0.990015	0.334447	0.530415	-5.87852	112	94	103	128
BTG1	0.0123105	2.83928	0.0724337	0.943004	0.969661	-6.62389	181	202	214	165
BTG2	-1.07808	3.42655	-7.54459	3.63649e-07	1.36275e-05	6.77348	383	462	181	206
BTG3	0.113319	4.80989	1.27098	0.21888	0.401982	-6.45874	774	680	797	732
BTK	-0.153916	6.8253	-3.17753	0.00489798	0.0290275	-3.51451	3236	3207	2797	2832
BTN2A1	0.629147	4.41469	6.88654	1.33903e-06	3.96403e-05	5.28807	456	467	686	702
BTN2A2	0.625405	1.72947	2.56926	0.0186506	0.0750349	-3.4015	91	56	102	113
BTN2A3P	1.56236	0.0310846	4.13996	0.000543307	0.00546568	-0.135272	20	12	45	46
BTN3A1	0.135487	2.42079	0.751294	0.461561	0.646843	-6.20477	127	148	150	143
BTN3A2	0.331168	4.58759	3.58527	0.00194077	0.0145195	-2.0583	537	620	701	710
BTNL9	-0.298978	5.84985	-4.97456	8.10734e-05	0.0011831	0.776408	1719	1727	1313	1410
BTRC	-0.093951	5.07158	-1.24093	0.229541	0.414865	-6.57156	966	906	812	893
BUB1	0.124485	7.81407	2.87988	0.00950531	0.0466023	-4.33012	5641	5976	6030	6274
BUB1B	-0.0974405	7.0076	-2.07968	0.0511505	0.151606	-5.76194	3641	3530	3152	3364
BUB3	-0.071939	7.99454	-1.78214	0.0905049	0.224159	-6.43616	6987	7101	6270	6762
BUD13	-0.00659103	5.04285	-0.0859065	0.932428	0.963017	-7.33572	912	867	875	847
BUD31	0.0768837	4.95047	1.00398	0.327842	0.52404	-6.79804	821	800	824	838
BX322557.10	0.203782	1.60383	0.880068	0.389676	0.583843	-5.84829	71	81	80	90
BYSL	-0.0623034	6.78504	-1.21234	0.240051	0.427079	-7.02368	3094	2976	2867	2785
BZRAP1	-0.0891112	2.15704	-0.461066	0.649917	0.793679	-6.29679	122	125	104	122
BZRAP1-AS1	-0.672711	1.01464	-2.2593	0.0356448	0.118251	-3.81935	73	64	31	55
BZW1	0.0418561	8.15759	1.02447	0.318312	0.514714	-7.46834	7823	7347	7292	7888
BZW1P2	0.181998	1.85345	0.760205	0.456341	0.642723	-6.01883	72	115	92	109
BZW2	0.0323473	6.8614	0.649526	0.523673	0.69778	-7.56336	3072	3121	3102	3055
C10orf118	-0.0140236	4.03099	-0.135725	0.893448	0.942936	-7.01427	434	450	428	423
C10orf12	-0.209846	3.93148	-1.71731	0.101967	0.243371	-5.55894	393	496	377	365
C10orf2	0.0145907	6.68685	0.29147	0.773809	0.874803	-7.70323	2828	2695	2662	2760
C10orf32	-0.489051	3.50801	-3.95362	0.000833695	0.0075538	-0.91459	358	367	254	248
C10orf35	0.0953759	0.587285	0.301632	0.766167	0.870127	-5.90911	44	34	35	46
C10orf76	-0.0323411	5.2669	-0.449815	0.657867	0.799235	-7.29809	1023	1075	953	1041
C10orf88	0.260744	3.68476	2.19417	0.0406859	0.129412	-4.67243	328	304	382	355
C10orf95	-0.149608	0.120564	-0.407463	0.688163	0.82132	-5.75979	33	28	20	35
C11orf1	-0.232912	2.92093	-1.49841	0.150243	0.313903	-5.55398	229	213	162	205
C11orf21	-0.904954	6.46687	-16.0856	1.27591e-12	5.45738e-10	19.0732	3153	3371	1668	1716
C11orf24	0.21343	5.52555	3.11342	0.00565633	0.0321103	-3.36178	1162	1141	1333	1265
C11orf30	-0.0525211	4.45043	-0.514989	0.612423	0.76678	-7.0217	590	610	494	637
C11orf31	0.103295	5.959	1.62365	0.12071	0.272532	-6.29219	1536	1701	1667	1708
C11orf48	0.0964202	4.71029	1.03884	0.311752	0.508144	-6.69119	676	686	761	660
C11orf49	-0.21774	3.97915	-2.07741	0.0513807	0.152034	-4.9751	461	454	386	379
C11orf54	0.289575	3.9945	2.64439	0.0158769	0.0666001	-3.90188	372	405	425	499
C11orf57	0.0711073	5.68513	1.10926	0.280983	0.475421	-6.89355	1314	1391	1341	1420
C11orf58	0.0849915	7.64607	1.96138	0.06446	0.177523	-6.08294	5419	5064	5310	5493
C11orf68	0.107797	4.80533	1.342	0.195208	0.372453	-6.36821	721	729	758	761
C11orf73	-0.0249024	4.90922	-0.318938	0.753208	0.862292	-7.2471	804	828	774	785
C11orf74	0.36314	2.7806	2.05287	0.0539282	0.157283	-4.64024	142	187	178	232
C11orf80	-0.326326	1.1229	-1.18086	0.25204	0.442288	-5.42139	56	76	47	54
C11orf82	0.0169789	5.33933	0.246983	0.807536	0.894266	-7.39222	1110	1058	1041	1091
C11orf83	-0.157726	3.57396	-1.31387	0.204331	0.383463	-6.01095	346	331	280	310
C11orf84	0.270362	3.44416	2.17007	0.0427113	0.133955	-4.63982	264	269	306	319
C11orf95	-1.27796	3.49062	-9.39387	1.2663e-08	8.67799e-07	10.0661	441	503	190	187
C11orf96	0.26031	1.86454	1.19462	0.246745	0.435379	-5.61143	81	98	109	99
C12orf10	0.120407	5.16003	1.65808	0.113505	0.261443	-6.0271	915	932	938	1014
C12orf23	0.146992	4.33723	1.48198	0.154528	0.319823	-6.0366	481	556	537	576
C12orf29	0.0549312	5.61265	0.807136	0.429448	0.620531	-7.16358	1342	1246	1223	1392
C12orf4	-0.145394	5.47385	-2.20828	0.0395416	0.127191	-5.18287	1267	1250	1092	1120
C12orf43	0.0333358	4.61402	0.371784	0.714114	0.837544	-7.13894	650	654	595	705
C12orf44	0.128388	4.29496	1.31579	0.2037	0.38267	-6.24366	509	501	558	517
C12orf45	0.292948	3.41746	2.2056	0.0397564	0.127393	-4.56661	272	248	279	342
C12orf49	-0.0533945	4.36827	-0.577089	0.570566	0.734541	-6.96061	554	579	512	549
C12orf57	0.213315	1.51408	0.832365	0.415409	0.607891	-5.86216	62	81	93	69
C12orf60	-0.400903	1.48933	-1.67941	0.109228	0.254722	-4.87146	83	90	61	66
C12orf65	0.21045	4.80271	2.37268	0.0282192	0.100439	-4.68455	707	691	709	869
C12orf66	-0.464204	2.61967	-2.72448	0.0133531	0.0591963	-3.32458	180	209	137	136
C12orf73	0.181504	3.17277	1.3056	0.207075	0.387	-5.89033	216	240	242	260
C12orf75	-0.246634	2.66022	-1.46857	0.158099	0.324726	-5.51296	198	173	138	166
C12orf76	-0.141374	1.40411	-0.578518	0.569621	0.734283	-6.00658	79	70	64	67
C14orf1	0.418213	5.36734	6.0808	7.14834e-06	0.000155558	3.35749	982	941	1245	1253
C14orf119	0.0819022	5.85082	1.22806	0.234228	0.420094	-6.8001	1552	1469	1619	1493
C14orf142	0.1827	3.30348	1.30918	0.205885	0.385479	-5.92872	276	225	256	295
C14orf159	-0.173312	5.24168	-2.10817	0.0483404	0.145714	-5.30089	1188	985	899	967
C14orf166	0.0327197	6.95199	0.694235	0.495827	0.675418	-7.55014	3355	3240	3222	3335
C14orf2	0.140341	5.88265	1.89148	0.0737018	0.1948	-5.84836	1523	1506	1442	1820
C14orf28	0.101891	1.21437	0.392505	0.698997	0.829064	-6.04338	56	64	59	66
C14orf37	-1.80183	0.232246	-5.02024	7.3153e-05	0.00108715	1.57722	66	52	15	17
C14orf39	-0.0524136	0.849887	-0.170781	0.866178	0.927327	-6.00691	53	45	57	37
C14orf79	-0.191721	3.32786	-1.44002	0.165926	0.334169	-5.7658	273	305	246	245
C14orf80	-0.390388	4.94405	-5.02474	7.24182e-05	0.00108268	1.12018	933	965	694	713
C14orf93	-0.310404	3.41005	-2.12045	0.0471724	0.143238	-4.71634	329	307	289	216
C15orf27	-0.258264	0.386338	-0.738624	0.469044	0.653674	-5.64064	32	45	38	25
C15orf39	-0.184895	4.88853	-2.34477	0.029901	0.104683	-4.76221	833	868	709	745
C15orf40	0.0798256	3.68342	0.667136	0.512603	0.688354	-6.67951	346	327	315	378
C15orf41	-0.103531	3.25958	-0.724673	0.477368	0.659532	-6.49715	297	240	224	260
C15orf57	-0.220301	4.0929	-1.98738	0.0612949	0.171543	-5.16822	479	512	447	383
C15orf61	0.261764	3.18238	1.79135	0.0889713	0.221963	-5.20151	252	197	249	271
C15orf62	0.51754	0.260228	1.44846	0.163579	0.331488	-4.90872	20	35	37	37
C16orf13	0.117469	5.35352	1.71334	0.102708	0.244527	-5.99625	1044	1070	1101	1128
C16orf46	-0.130795	0.351957	-0.377079	0.710239	0.835845	-5.826	28	45	29	34
C16orf52	0.0287883	3.0816	0.203094	0.841193	0.912475	-6.68565	235	216	215	232
C16orf58	0.00261364	4.9292	0.0315412	0.975163	0.986375	-7.3057	848	791	831	767
C16orf59	0.171487	4.92123	2.20852	0.0395223	0.127191	-5.02821	775	762	842	841
C16orf62	-0.149806	5.9057	-2.35852	0.0290613	0.102695	-5.0119	1793	1612	1489	1491
C16orf70	0.0522243	4.71948	0.606304	0.551395	0.718671	-7.05299	667	727	710	694
C16orf72	0.153042	5.55986	2.23398	0.0375324	0.122641	-5.15907	1155	1257	1249	1356
C16orf80	0.307251	4.88023	3.78593	0.00122542	0.0101741	-1.68935	684	743	827	888
C16orf86	0.0669103	0.623073	0.216902	0.830566	0.907136	-5.93967	40	40	45	37
C16orf87	0.389803	3.74099	3.38651	0.00305334	0.0203951	-2.24944	303	326	381	420
C16orf91	0.110594	4.46825	1.24337	0.22866	0.41378	-6.38782	582	565	579	625
C16orf93	-0.603599	1.59105	-2.48986	0.0220751	0.084304	-3.52017	87	114	61	66
C16orf95	-0.450339	1.60696	-1.82437	0.0836558	0.212898	-4.68117	108	84	78	59
C17orf103	-0.579008	4.43514	-6.32448	4.26893e-06	0.000101246	4.11231	697	727	450	476
C17orf104	-0.199683	4.92821	-2.59278	0.0177365	0.0723457	-4.28737	877	880	725	762
C17orf107	-0.356827	0.143122	-0.904644	0.376835	0.571636	-5.45731	42	26	35	18
C17orf49	0.226879	-0.458004	0.477902	0.638101	0.785453	-5.60283	11	28	27	15
C17orf51	0.133782	3.35703	1.00857	0.325691	0.522702	-6.28427	273	253	294	268
C17orf53	-0.169219	4.45971	-1.80786	0.0862784	0.217475	-5.58372	601	656	553	533
C17orf58	0.191692	4.3389	1.98365	0.0617396	0.172326	-5.25341	500	520	524	610
C17orf59	0.203226	3.02998	1.33154	0.198562	0.376198	-5.81113	215	195	202	259
C17orf62	-0.0597639	5.37543	-0.817622	0.423576	0.614652	-7.08953	1115	1167	1100	1030
C17orf67	0.225729	1.11656	0.846168	0.407853	0.600619	-5.74173	55	52	64	58
C17orf70	-0.00358823	6.3537	-0.0618956	0.951284	0.973922	-7.67621	2137	2275	2170	2107
C17orf72	-1.44577	0.0396865	-3.4787	0.0024754	0.0175557	-1.418	52	39	25	10
C17orf75	-0.0862182	3.88438	-0.74152	0.467328	0.65228	-6.6924	450	372	380	370
C17orf80	-0.000796297	4.87382	-0.0097098	0.992353	0.996253	-7.2898	758	823	731	804
C17orf85	-0.0322212	5.9861	-0.557107	0.583874	0.745176	-7.43327	1760	1693	1604	1678
C17orf89	0.0761548	5.22252	1.04715	0.307998	0.50378	-6.83242	996	963	947	1062
C17orf96	0.342031	5.50405	4.74219	0.000137112	0.00182814	0.330584	1107	1063	1394	1284
C17orf97	0.146176	1.39495	0.581304	0.567779	0.732626	-6.00274	77	58	69	75
C17orf99	-2.5859	1.21161	-8.08226	1.30889e-07	5.75727e-06	7.15311	133	174	31	19
C18orf21	0.186427	4.51597	2.08252	0.0508637	0.150972	-5.13551	580	575	599	680
C18orf25	-0.212999	5.47163	-3.03045	0.00680868	0.0367355	-3.52568	1346	1230	1020	1140
C18orf54	0.196446	4.26302	1.98785	0.0612378	0.171427	-5.22232	491	475	496	582
C18orf56	-0.116241	0.298227	-0.323824	0.749562	0.860169	-5.83117	29	40	23	40
C18orf8	-0.0026618	4.30717	-0.0275074	0.978338	0.988217	-7.11332	514	553	526	509
C19orf10	0.130859	6.54547	2.54502	0.019639	0.0776639	-4.78869	2425	2384	2463	2657
C19orf12	0.139645	4.25146	1.46144	0.160025	0.327119	-6.03779	503	474	515	531
C19orf24	0.0304471	5.84032	0.504172	0.619861	0.772274	-7.42665	1540	1514	1453	1580
C19orf25	0.060591	6.02391	1.04236	0.310158	0.506545	-7.04949	1751	1681	1739	1740
C19orf26	-0.560928	2.22993	-2.73998	0.0129109	0.0577528	-3.18768	139	168	114	89
C19orf40	0.0478013	3.26979	0.355334	0.726203	0.843943	-6.70489	270	241	244	269
C19orf43	0.155559	7.27924	3.39638	0.00298562	0.0200233	-3.11552	3880	4051	4191	4394
C19orf44	0.0694277	3.22875	0.516288	0.611533	0.765898	-6.61901	251	241	253	249
C19orf47	0.276543	5.42555	4.08618	0.000614759	0.00601378	-1.15258	1036	1067	1231	1245
C19orf48	0.00600039	8.08936	0.127378	0.899963	0.946429	-7.98653	7109	7537	7336	6961
C19orf52	0.0811576	5.36947	1.14641	0.265674	0.458653	-6.76624	1131	1035	1116	1110
C19orf53	0.0777922	6.63864	1.51587	0.145799	0.307525	-6.59844	2695	2532	2603	2758
C19orf54	-0.453931	4.14028	-4.54312	0.000215724	0.0026031	0.245569	546	565	391	397
C19orf55	-0.188536	5.49026	-2.63673	0.0161406	0.067367	-4.35465	1302	1281	1151	1056
C19orf57	-0.100591	4.20446	-1.02886	0.316299	0.51239	-6.54179	505	523	444	488
C19orf60	0.0859855	5.83622	1.39418	0.179145	0.350602	-6.5867	1503	1483	1561	1521
C19orf66	-0.61129	2.3714	-3.15964	0.00509898	0.0298651	-2.35753	160	184	123	97
C19orf68	0.216251	2.46443	1.12998	0.272367	0.466622	-5.86861	124	152	175	138
C19orf70	0.0819191	5.79758	1.3043	0.207508	0.387196	-6.69311	1508	1406	1431	1567
C19orf71	-0.37528	1.55835	-1.45237	0.162501	0.330112	-5.20677	98	82	84	54
C19orf73	0.378615	0.0433714	1.04079	0.310866	0.507165	-5.31524	27	21	34	27
C19orf81	-0.0404226	1.22801	-0.157903	0.876178	0.932832	-6.11153	64	63	58	62
C19orf82	-0.687069	0.0301864	-1.77111	0.0923727	0.227294	-4.42762	29	41	15	28
C1D	0.111459	5.06893	1.42233	0.170929	0.340815	-6.33964	908	833	856	973
C1GALT1	-0.0589575	5.16504	-0.763875	0.454202	0.641092	-7.07338	993	980	846	999
C1GALT1C1	0.0141717	3.5941	0.110101	0.913469	0.952557	-6.8726	293	357	300	335
C1orf109	-0.0808572	5.0913	-1.09632	0.286464	0.480762	-6.74256	963	925	860	875
C1orf112	0.164471	5.16416	2.28316	0.033947	0.114597	-4.95831	930	894	978	1009
C1orf122	0.140263	4.18866	1.40986	0.17453	0.3452	-6.08748	484	451	510	492
C1orf123	-0.173065	4.29761	-1.72807	0.099982	0.240158	-5.65954	537	589	448	523
C1orf131	-0.114343	5.05817	-1.52654	0.143138	0.304229	-6.1914	930	937	801	876
C1orf132	0.133287	3.2777	1.00518	0.327279	0.523544	-6.26145	257	241	267	264
C1orf134	0.207266	0.587211	0.615259	0.545588	0.715227	-5.7693	32	43	53	33
C1orf159	0.214734	4.63616	2.35553	0.0292421	0.103078	-4.66808	583	662	711	691
C1orf174	0.333657	5.55373	5.09767	6.14835e-05	0.000943863	1.12716	1107	1147	1337	1424
C1orf186	-0.510408	1.22739	-1.83451	0.08208	0.209829	-4.57138	72	78	39	66
C1orf192	-0.104098	2.10887	-0.52302	0.606928	0.762591	-6.25045	132	109	105	112
C1orf198	0.12115	6.13031	2.06227	0.0529394	0.155039	-5.61258	1825	1792	1951	1875
C1orf213	-0.02603	0.777008	-0.0872431	0.931379	0.962495	-5.99856	53	40	45	43
C1orf216	-0.0145739	4.91446	-0.175917	0.862196	0.924339	-7.28562	815	818	720	855
C1orf233	0.0946708	0.381036	0.285662	0.778188	0.87786	-5.86271	36	31	39	31
C1orf27	0.140757	4.58384	1.45561	0.161615	0.329006	-6.15026	648	584	592	732
C1orf35	0.0011034	5.11397	0.0145908	0.988509	0.994038	-7.35996	957	907	924	890
C1orf43	0.0512926	6.89847	1.00001	0.32971	0.52554	-7.27778	3097	3219	3007	3359
C1orf50	-0.202378	3.22355	-1.4964	0.150763	0.314667	-5.65444	262	277	226	229
C1orf51	0.534659	3.00732	3.57629	0.001981	0.014767	-1.62178	195	165	255	251
C1orf52	-0.0868504	4.36348	-0.944629	0.356553	0.55187	-6.67556	564	578	514	531
C1orf53	0.232974	0.776571	0.762794	0.454832	0.641479	-5.71857	49	36	54	43
C1orf56	0.440708	0.711709	1.33185	0.198462	0.376064	-5.14878	28	50	42	58
C1orf63	-0.132046	5.76114	-2.10059	0.0490734	0.147189	-5.45495	1504	1555	1294	1420
C1orf74	-0.211944	2.79956	-1.33773	0.196572	0.374027	-5.72869	192	211	174	164
C1orf85	0.173794	4.59453	1.95032	0.0658499	0.179992	-5.38962	608	616	695	649
C1orf86	0.0698743	4.9787	0.89632	0.381153	0.575931	-6.90865	814	843	856	835
C1QBP	0.163581	8.7906	4.53915	0.000217686	0.00261644	-0.736247	11394	11151	11791	12765
C1QL3	-0.37271	0.422787	-1.02447	0.318315	0.514714	-5.41276	39	42	44	21
C1QTNF6	0.233589	1.25543	0.876031	0.391812	0.58597	-5.75408	69	50	72	63
C1RL	-0.791967	3.07308	-5.34901	3.51125e-05	0.000598295	2.30905	320	277	165	169
C1RL-AS1	-0.263213	3.6346	-2.22051	0.0385734	0.125285	-4.60703	376	356	302	291
C20orf112	-1.477	4.21688	-14.3481	9.80181e-12	2.8948e-09	17.0657	845	826	279	304
C20orf194	-0.145941	2.61731	-0.878394	0.390561	0.584893	-6.16365	170	177	142	163
C20orf196	0.128497	2.22358	0.679553	0.504876	0.682692	-6.193	115	125	120	135
C20orf24	0.109381	4.55157	1.18363	0.250969	0.441069	-6.4843	657	562	620	655
C20orf27	0.000562341	7.01814	0.0116001	0.990864	0.995295	-7.8126	3512	3468	3432	3357
C20orf96	-0.0261871	3.61292	-0.206852	0.838297	0.910928	-6.86279	340	325	280	358
C21orf119	0.175932	1.93469	0.848585	0.40654	0.599681	-5.97374	93	100	100	112
C21orf2	0.158316	3.49862	1.23124	0.233062	0.418607	-6.08782	285	290	333	293
C21orf33	0.0926803	6.79033	1.86966	0.0768171	0.200725	-6.08215	2973	2803	2944	3041
C21orf58	-0.0750247	3.69486	-0.569405	0.575665	0.738652	-6.74469	324	394	356	306
C21orf59	0.369287	4.25995	3.77476	0.00125723	0.0103633	-1.53634	469	439	535	606
C21orf67	-0.479914	1.90582	-1.95934	0.0647147	0.177908	-4.54256	151	93	90	76
C21orf91	-0.409909	4.72248	-4.708	0.000148185	0.00194506	0.460312	799	841	555	646
C22orf23	0.715991	0.427659	2.01945	0.0575821	0.164498	-4.11671	25	31	33	60
C22orf29	0.126854	5.65636	2.00292	0.0594688	0.167953	-5.60063	1307	1292	1381	1378
C22orf34	0.217348	3.60191	1.8313	0.0825759	0.210842	-5.2727	311	295	328	357
C22orf39	0.106047	4.07875	1.02004	0.320359	0.517077	-6.51063	463	415	435	483
C22orf46	0.305908	3.54484	2.37086	0.0283262	0.100698	-4.29814	282	282	366	315
C2CD2	0.407041	4.07153	4.00032	0.000748855	0.00693194	-0.971236	406	380	498	515
C2CD2L	-0.152901	4.28175	-1.61427	0.122738	0.275107	-5.82818	544	560	479	486
C2CD3	0.226095	4.94808	2.79096	0.011553	0.0537322	-3.88854	791	747	812	939
C2CD5	-0.0836276	6.16653	-1.29249	0.211486	0.39206	-6.79596	1873	2117	1838	1815
C2orf27A	-0.0138564	0.381229	-0.0357748	0.97183	0.984369	-5.90183	30	40	51	22
C2orf42	-0.0464983	3.04006	-0.313174	0.757516	0.865191	-6.64222	246	205	212	211
C2orf43	0.15787	5.01461	2.06757	0.0523885	0.153878	-5.30988	808	840	893	894
C2orf44	0.354697	5.27951	4.8178	0.000115511	0.001592	0.560902	881	971	1125	1174
C2orf47	0.096366	4.65526	1.1344	0.270554	0.464685	-6.57202	681	632	658	706
C2orf48	-0.158648	0.735769	-0.455768	0.653656	0.795846	-5.8891	41	54	27	61
C2orf49	0.152252	5.07434	1.96977	0.0634221	0.175544	-5.49756	822	901	907	952
C2orf62	-1.60392	-0.669739	-3.6776	0.00157101	0.0122636	-1.09598	29	29	10	8
C2orf68	0.0908795	4.61844	1.06521	0.29996	0.495975	-6.63562	660	622	641	686
C2orf69	-0.0116697	5.56536	-0.165408	0.870347	0.929858	-7.47236	1227	1337	1160	1312
C2orf76	-0.00865997	2.35056	-0.0465587	0.963344	0.980815	-6.46699	134	141	117	150
C2orf82	0.213266	0.545882	0.671234	0.510045	0.686257	-5.72463	35	37	46	36
C2orf88	0.153889	5.30901	2.2338	0.0375458	0.122641	-5.09087	1011	1013	1069	1120
C3orf17	-0.0814561	6.12075	-1.33691	0.196835	0.374183	-6.72945	1845	2015	1705	1838
C3orf18	-0.586344	0.876383	-1.96256	0.0643125	0.177313	-4.29205	61	59	47	32
C3orf33	0.283825	3.15123	1.84494	0.080487	0.207613	-5.10528	194	242	228	287
C3orf38	0.0703244	4.70857	0.849425	0.406084	0.599222	-6.86953	675	699	691	711
C3orf52	0.046256	2.0082	0.208238	0.83723	0.91051	-6.33544	110	102	128	89
C3orf58	0.144184	4.07108	1.39269	0.179589	0.351249	-6.07246	440	421	431	495
C3orf62	0.103043	2.9206	0.6808	0.504104	0.681961	-6.41635	187	206	208	202
C3orf80	0.00651822	4.12472	0.0614642	0.951623	0.973922	-7.05255	470	466	487	430
C4orf21	-0.0724272	5.36348	-1.05467	0.304632	0.500919	-6.86378	1120	1154	1017	1085
C4orf27	0.0925502	4.76277	1.11708	0.277708	0.471968	-6.62375	712	704	690	779
C4orf29	0.12271	4.20052	1.25195	0.225586	0.409988	-6.29226	475	473	510	494
C4orf3	0.108059	5.10837	1.3791	0.183675	0.357157	-6.40842	853	939	889	987
C4orf32	0.146384	5.15054	2.03324	0.056048	0.161484	-5.40902	913	905	960	996
C4orf33	-0.23859	3.4356	-1.85369	0.0791713	0.205173	-5.18154	329	304	240	282
C4orf36	0.114699	2.50783	0.625072	0.539263	0.709938	-6.31985	130	166	140	170
C4orf46	-0.174988	3.90515	-1.56439	0.134015	0.290921	-5.78018	429	427	390	349
C4orf48	0.216245	3.25267	1.43863	0.166313	0.334732	-5.74376	213	266	238	302
C5AR2	-1.08848	2.76444	-6.69734	1.969e-06	5.4154e-05	5.16661	260	273	120	123
C5orf15	0.0577447	5.24261	0.805162	0.430558	0.621294	-7.06272	991	1007	1020	1002
C5orf22	0.102992	5.23207	1.40696	0.175377	0.346123	-6.40661	958	996	963	1078
C5orf24	0.0545523	5.72313	0.847382	0.407193	0.599933	-7.15921	1385	1406	1436	1383
C5orf28	0.0828183	4.01949	0.804553	0.430901	0.621572	-6.68787	419	429	434	439
C5orf30	-0.0111642	5.12637	-0.150104	0.882244	0.93581	-7.35182	917	972	899	922
C5orf34	0.46742	3.08859	3.30327	0.00368784	0.0235309	-2.24178	201	188	253	270
C5orf42	-0.464191	1.23564	-1.80909	0.0860808	0.217242	-4.61331	75	73	52	52
C5orf45	0.151312	4.742	1.62292	0.120868	0.272689	-5.95836	677	689	796	685
C5orf51	0.0847766	6.0295	1.32197	0.201669	0.380215	-6.72769	1703	1715	1619	1913
C5orf54	0.271947	1.16446	1.03972	0.31135	0.507655	-5.58008	57	52	63	65
C5orf55	-0.145065	1.79621	-0.670708	0.510373	0.686475	-6.0645	103	93	84	88
C5orf56	-0.571087	-0.000537586	-1.56565	0.133719	0.290482	-4.70734	29	36	22	20
C5orf63	-0.5721	2.05876	-2.4798	0.022549	0.0856919	-3.65178	110	169	92	86
C5orf66	-0.0730703	1.92601	-0.345035	0.733809	0.848512	-6.27077	95	115	94	99
C6orf1	0.0576276	3.9631	0.544961	0.592038	0.751844	-6.84781	407	416	394	439
C6orf106	0.0476286	7.33894	1.07605	0.295203	0.490901	-7.28116	4295	4283	4291	4327
C6orf120	-0.259302	5.91142	-4.31802	0.000361048	0.00392501	-0.741632	1812	1736	1378	1504
C6orf136	0.0720815	5.01742	0.957331	0.350268	0.546232	-6.8633	841	860	858	880
C6orf163	-0.465378	1.73385	-2.02603	0.056845	0.162973	-4.38608	97	113	81	67
C6orf164	-0.463893	-0.246099	-1.05916	0.302635	0.498656	-5.23776	23	30	11	30
C6orf165	-0.274401	0.233573	-0.806574	0.429763	0.620531	-5.55595	38	31	27	28
C6orf183	0.362274	0.0942315	0.972795	0.34272	0.538932	-5.38843	22	28	39	25
C6orf201	-0.472046	0.0521162	-1.24048	0.229704	0.415079	-5.11181	36	29	30	17
C6orf203	0.138104	4.38995	1.42827	0.169237	0.338747	-6.12689	509	569	542	610
C6orf211	-0.0149093	5.52449	-0.223467	0.825526	0.904406	-7.44944	1217	1276	1153	1245
C6orf223	-1.81801	-0.00721249	-4.38164	0.00031207	0.00349361	0.316114	51	49	8	22
C6orf226	-0.211141	0.519206	-0.652853	0.521571	0.696551	-5.72941	48	35	37	32
C6orf47	0.0352604	4.24628	0.335533	0.740852	0.853928	-7.03553	557	457	480	526
C6orf48	0.124162	6.25201	2.1598	0.0436016	0.135888	-5.46433	2060	1876	2062	2104
C6orf57	0.411279	2.57511	2.3699	0.0283825	0.100789	-4.00561	155	124	179	180
C6orf62	0.00919522	8.20752	0.226473	0.823221	0.903122	-7.98567	7893	7984	7381	8163
C6orf89	-0.0330988	7.81044	-0.806949	0.429552	0.620531	-7.61531	6164	6068	5792	5828
C7orf13	-0.0105714	2.87533	-0.0671204	0.947178	0.97226	-6.63606	209	187	204	179
C7orf26	0.0962398	5.31949	1.33709	0.196778	0.374183	-6.52254	1022	1059	1016	1148
C7orf31	0.173261	0.906143	0.600983	0.554861	0.721209	-5.8585	46	48	58	46
C7orf34	-0.741854	1.05865	-2.60278	0.0173608	0.0711408	-3.20077	64	81	47	37
C7orf43	-0.081357	4.03669	-0.708053	0.487397	0.667587	-6.76707	470	438	458	381
C7orf49	-0.0284254	4.98615	-0.367728	0.717088	0.839352	-7.25238	870	853	834	809
C7orf50	0.0813107	5.88018	1.26903	0.219559	0.402811	-6.75774	1629	1459	1588	1584
C7orf55-LUC7L2	-0.0322342	6.07578	-0.567294	0.57707	0.739945	-7.44851	1819	1855	1722	1770
C7orf60	0.394019	3.36143	3.06768	0.0062658	0.0345554	-2.82764	244	238	306	310
C7orf73	-0.0340621	5.20564	-0.459997	0.650671	0.793679	-7.27597	1010	1000	980	930
C8G	-1.75233	-0.44238	-4.21375	0.000458626	0.00477248	-0.0752366	39	33	10	10
C8orf33	-0.00633953	6.57513	-0.12261	0.903687	0.948141	-7.717	2530	2618	2460	2521
C8orf37	-0.0616239	3.17193	-0.45062	0.657297	0.798698	-6.63226	245	250	230	231
C8orf44	0.0179775	2.55938	0.094389	0.925776	0.959699	-6.53109	158	156	185	130
C8orf58	-0.608418	0.964461	-2.09549	0.0495729	0.148276	-4.09146	56	74	44	38
C8orf59	-0.0603266	5.62097	-0.892753	0.383013	0.577826	-7.09214	1381	1327	1174	1354
C8orf76	0.409357	2.17206	2.11583	0.0476088	0.144054	-4.35241	99	111	137	134
C8orf82	-0.045835	5.22554	-0.601558	0.554487	0.72104	-7.20395	1031	1015	1006	924
C8orf88	-0.00825401	5.51149	-0.11819	0.907142	0.949456	-7.46475	1292	1175	1125	1259
C9orf114	0.135056	6.10429	2.32725	0.0310035	0.107311	-5.119	1804	1732	1905	1870
C9orf116	-0.558358	1.40099	-2.25991	0.0356007	0.118194	-3.89986	92	80	57	56
C9orf117	0.0405555	1.6438	0.161202	0.873614	0.931674	-6.23154	70	97	96	71
C9orf142	-0.0909358	4.68294	-1.03613	0.312981	0.509411	-6.68517	735	692	677	627
C9orf156	0.0188188	4.33893	0.201226	0.842633	0.913239	-7.10289	550	532	539	527
C9orf16	-0.0328488	4.0195	-0.308055	0.761349	0.866986	-6.97062	469	415	424	415
C9orf172	0.0704649	3.14821	0.479647	0.636882	0.784809	-6.61067	243	223	209	269
C9orf3	-0.0334295	2.4186	-0.178292	0.860356	0.92393	-6.47376	151	140	117	162
C9orf37	0.331361	4.11599	3.31883	0.00356016	0.0228809	-2.51061	417	415	489	529
C9orf40	0.1775	5.58254	2.66991	0.0150271	0.0643635	-4.31275	1271	1158	1313	1355
C9orf41	-0.294073	6.42381	-5.19369	4.96011e-05	0.000795928	1.14957	2633	2491	1904	2162
C9orf43	0.354603	0.309253	1.04928	0.307041	0.502844	-5.36449	30	28	41	32
C9orf64	0.175266	5.29688	2.42362	0.0253745	0.0927903	-4.72638	1035	959	1036	1153
C9orf69	-0.212194	6.05241	-3.71191	0.00145222	0.0115673	-2.16046	1912	1936	1563	1666
C9orf72	-0.305733	3.06653	-1.78084	0.0907245	0.224441	-5.17944	217	290	167	231
C9orf78	0.0615168	6.64403	1.12344	0.275065	0.469636	-7.09732	2593	2683	2507	2851
C9orf85	0.230079	2.90448	1.41187	0.173946	0.344591	-5.66679	188	183	238	189
C9orf89	-0.117882	2.57244	-0.702513	0.490767	0.671166	-6.28824	161	172	148	150
C9orf9	-0.520646	1.1703	-1.89717	0.0729085	0.193081	-4.46006	72	72	58	41
C9orf91	0.128342	4.53193	1.36671	0.187465	0.362425	-6.25307	561	632	647	619
CA1	-0.0309833	11.9022	-1.32827	0.199622	0.377571	-7.64567	103482	104975	96723	101608
CA11	-0.923221	0.770774	-3.0165	0.00702345	0.0374647	-2.35961	73	54	30	34
CA13	-0.716103	0.170986	-1.99927	0.0598932	0.169036	-4.10588	32	46	23	22
CA2	0.0454926	9.11999	1.35601	0.190788	0.366392	-7.21694	14731	14776	14570	15030
CA3	0.247051	0.205116	0.720858	0.479659	0.6611	-5.61152	29	27	35	30
CA5B	-0.532162	1.78472	-2.2851	0.0338123	0.114342	-3.94506	95	130	75	74
CA5BP1	0.156862	4.1728	1.58519	0.129211	0.284576	-5.83696	476	444	476	521
CA8	0.0598304	7.31396	1.2711	0.218837	0.40197	-7.05242	4155	4243	4027	4489
CAAP1	0.11359	5.54666	1.59753	0.12643	0.280394	-6.22526	1248	1172	1323	1225
CAB39	-0.166522	7.95848	-4.18749	0.000487116	0.00499355	-1.42831	7163	7033	6100	6194
CAB39L	-0.243597	1.08854	-0.854983	0.403075	0.596201	-5.72646	75	51	45	57
CABIN1	-0.232318	7.39002	-4.62287	0.000179855	0.00227181	-0.334304	4943	4848	4200	3910
CABLES1	-0.0495907	4.3524	-0.503201	0.620531	0.772953	-6.99669	529	591	539	512
CABLES2	-0.793736	2.94092	-5.12946	5.72584e-05	0.000890017	1.85298	286	258	160	145
CABP7	-1.51272	-0.327877	-3.71513	0.00144153	0.0114989	-0.987258	40	32	10	14
CACNA1C	0.055686	1.56204	0.237393	0.814859	0.899084	-6.19186	80	75	83	74
CACNA1C-AS1	0.0934087	1.12626	0.29702	0.769632	0.871838	-6.05183	48	66	80	43
CACNA1H	-0.252085	5.23189	-3.47333	0.00250588	0.0176909	-2.48887	1120	1088	917	886
CACNA2D4	-0.759533	1.52634	-3.2033	0.00462198	0.0278577	-2.08883	99	102	55	60
CACNB1	-0.348446	1.41315	-1.42411	0.170421	0.340238	-5.20528	81	80	56	67
CACNB2	0.191539	1.88569	0.900898	0.378774	0.573385	-5.91388	101	85	98	108
CACTIN	0.0448208	6.11354	0.676557	0.506735	0.68382	-7.38741	1840	1830	1948	1741
CACTIN-AS1	-0.37219	0.109994	-0.990926	0.334013	0.529944	-5.37491	33	32	33	18
CACUL1	-0.0971794	6.23766	-1.70496	0.104287	0.247143	-6.23194	2113	2092	1800	2025
CACYBP	0.263758	7.62571	5.27006	4.184e-05	0.000689464	1.1036	4877	4836	5229	6134
CAD	0.0584096	8.65738	1.46808	0.15823	0.324787	-7.00294	10366	10958	10775	10799
CALB1	0.452516	-0.105007	1.21848	0.237761	0.424649	-5.10554	19	23	29	27
CALCOCO1	-0.130787	4.33326	-1.3658	0.187746	0.362759	-6.19116	601	536	498	510
CALCOCO2	0.231039	5.47836	3.26577	0.00401428	0.0250847	-3.01637	1060	1159	1204	1326
CALHM2	-0.0572658	1.95673	-0.260842	0.796984	0.888526	-6.30641	108	104	116	85
CALM1	0.0912678	6.98668	1.86664	0.0772579	0.201491	-6.12524	3260	3361	3273	3586
CALM2	-0.05282	8.65264	-1.4408	0.165708	0.333838	-7.03982	11221	10862	10304	10387
CALM2P2	-0.118874	0.0658743	-0.330378	0.744682	0.856527	-5.7745	32	26	29	23
CALM3	-0.00563986	9.17696	-0.168504	0.867944	0.928422	-8.13271	15743	15501	14985	15265
CALML4	-0.296425	3.05363	-2.06216	0.0529504	0.155039	-4.70726	251	244	183	209
CALR	-0.0570294	9.60246	-1.75876	0.0945034	0.230934	-6.69838	21781	20946	19285	20643
CALU	0.087779	6.45868	1.58204	0.129929	0.285489	-6.46564	2309	2288	2226	2529
CAMK1D	-1.00068	2.34316	-5.33258	3.64145e-05	0.000615375	2.37884	203	183	96	91
CAMK2G	0.138938	4.54441	1.39282	0.179551	0.351229	-6.22256	605	591	698	589
CAMKK1	-1.38846	2.63475	-7.59018	3.32968e-07	1.25919e-05	6.87088	246	297	97	103
CAMKK2	-0.490136	5.19448	-6.68662	2.01278e-06	5.51083e-05	4.69225	1139	1199	794	823
CAMKMT	-0.140164	3.28409	-1.0671	0.299125	0.495042	-6.19976	279	271	237	248
CAMLG	0.203036	4.59286	2.21638	0.0388978	0.125943	-4.91646	639	574	628	730
CAMSAP1	-0.107653	5.78572	-1.7134	0.102696	0.244527	-6.11176	1502	1583	1387	1395
CAMTA1	0.238938	3.51936	1.56873	0.132999	0.289476	-5.64878	350	230	313	339
CAMTA2	-0.131361	5.27053	-1.68791	0.107562	0.252163	-6.01205	1039	1138	999	933
CAND1	0.0920823	7.81073	2.18624	0.0413423	0.130952	-5.70939	5783	5935	5828	6317
CAND2	-0.133737	0.08882	-0.370875	0.71478	0.837811	-5.76617	31	28	31	22
CANT1	0.0114133	6.01392	0.192087	0.849686	0.91725	-7.58225	1777	1690	1714	1683
CANX	0.0626379	9.64666	1.8137	0.085342	0.215993	-6.61601	21432	20834	20349	22595
CAP1	-0.0596489	7.27776	-1.29637	0.210173	0.390326	-7.01439	4399	4138	3953	4006
CAPG	-1.05625	1.41779	-3.99204	0.000763239	0.00703359	-0.412487	105	102	37	62
CAPN1	-0.376607	7.95361	-8.49276	6.15515e-08	3.12351e-06	7.7539	7648	7566	5839	5558
CAPN10	0.0584171	4.46261	0.637693	0.531185	0.703879	-6.95308	598	565	603	575
CAPN10-AS1	0.345278	1.69033	1.28013	0.215711	0.398034	-5.46081	58	101	111	81
CAPN15	0.0229677	7.59645	0.492544	0.627905	0.778123	-7.79005	5176	5165	5234	4985
CAPN2	-0.233812	5.15207	-2.87114	0.00969002	0.0473022	-3.77704	1035	1043	772	952
CAPN5	-1.66974	3.6589	-13.102	4.82645e-11	1.06906e-08	15.4086	627	586	188	182
CAPN7	0.176074	5.87057	2.30418	0.0325128	0.110946	-5.10719	1429	1540	1451	1823
CAPNS1	-0.0641827	7.96609	-1.51962	0.14486	0.306371	-6.83039	6883	6889	6485	6322
CAPRIN1	0.0175038	9.12244	0.525436	0.605279	0.761217	-7.99611	14969	14877	14361	15006
CAPRIN2	-0.308135	6.47289	-5.7578	1.43201e-05	0.000279287	2.40351	2685	2638	2112	2068
CAPS	0.391104	1.26895	1.49484	0.151166	0.315349	-5.07571	63	50	77	67
CAPZA1	0.0624711	8.12141	1.59544	0.126897	0.280977	-6.74394	7475	7209	7208	7699
CAPZA2	-0.11896	6.85744	-2.4788	0.0225966	0.0857937	-4.982	3249	3260	2880	2946
CAPZB	0.057723	7.42461	1.27699	0.216792	0.399329	-7.0648	4439	4636	4432	4749
CARD6	0.0253722	3.7662	0.223951	0.825155	0.904171	-6.91018	378	348	361	357
CARD8	0.212463	5.59731	3.30003	0.00371497	0.0236503	-2.9725	1241	1182	1319	1410
CARD9	0.275055	1.0399	0.966051	0.345998	0.542094	-5.61767	59	42	64	54
CARF	-0.526554	1.58099	-2.13408	0.0459069	0.140704	-4.16256	86	108	55	76
CARHSP1	-0.627087	5.28304	-8.61412	4.94516e-08	2.67859e-06	8.4579	1275	1331	830	810
CARKD	-0.215262	4.97516	-2.83587	0.010471	0.0499549	-3.80171	918	907	744	784
CARM1	-0.0311307	7.70998	-0.736283	0.470436	0.6544	-7.65465	5787	5615	5428	5418
CARNS1	-1.1664	0.283575	-3.04796	0.00654787	0.0356151	-2.25506	38	62	27	16
CARS	-0.0615789	6.52825	-1.1603	0.260113	0.452398	-7.032	2590	2489	2385	2346
CARS2	0.113455	6.2469	1.88906	0.0740415	0.19549	-5.93704	2086	1853	2062	2074
CASC3	-0.173644	7.20521	-3.69282	0.00151717	0.0119334	-2.43497	4119	4326	3591	3684
CASC4	0.240782	5.40476	3.51402	0.00228383	0.0165567	-2.44536	1089	1011	1179	1232
CASC5	-0.19296	7.03038	-3.98456	0.00077647	0.00712904	-1.73775	3719	3812	3053	3354
CASC7	-0.22509	7.35164	-5.02088	7.30486e-05	0.00108715	0.583605	4727	4787	3795	4120
CASD1	-0.270404	3.27321	-2.04236	0.0550543	0.159443	-4.81101	283	288	229	231
CASK	-0.149044	2.83377	-0.958269	0.349807	0.545787	-6.16049	194	210	166	188
CASKIN2	-0.756091	1.0328	-2.56475	0.018831	0.0755823	-3.26758	73	69	52	32
CASP10	0.0740698	4.8012	0.924015	0.366915	0.561601	-6.8308	726	737	741	756
CASP2	-0.0567489	6.24376	-0.956431	0.350711	0.546648	-7.18506	1999	2167	1951	1939
CASP3	0.166583	6.93697	3.5179	0.00226366	0.0164587	-2.78096	3160	3071	3294	3505
CASP4	-0.417482	0.855621	-1.41005	0.174477	0.3452	-5.08509	48	65	39	42
CASP6	0.00408861	5.18356	0.0564607	0.955557	0.976256	-7.37845	1000	955	913	993
CASP7	-0.712434	0.213275	-2.03816	0.0555102	0.160351	-4.05099	42	37	27	20
CASP8	-0.0924898	5.05222	-1.19451	0.246787	0.435379	-6.62091	904	942	790	894
CASP8AP2	-0.013831	5.83938	-0.231157	0.819631	0.900984	-7.53078	1562	1537	1444	1540
CASP9	-0.0485714	2.81627	-0.306888	0.762223	0.867714	-6.57035	180	206	171	191
CASS4	-1.20616	0.847001	-4.04189	0.000680628	0.0064461	-0.283001	66	81	30	31
CAST	-0.159515	8.65864	-4.44058	0.000272684	0.00315225	-0.945282	11614	11395	9921	10102
CAT	-0.0812193	8.05922	-2.09779	0.0493476	0.147745	-5.90839	7458	7322	6664	6916
CATSPER2	-0.137649	2.20241	-0.712395	0.484765	0.666042	-6.16279	120	140	108	121
CATSPERG	-0.212769	0.096085	-0.609452	0.54935	0.717807	-5.65634	31	30	25	26
CAV2	-0.298008	2.13911	-1.50881	0.147583	0.310221	-5.29765	121	142	103	104
CBFA2T2	0.12924	4.61467	1.27585	0.217186	0.399758	-6.39372	695	571	710	634
CBFA2T3	-0.0309826	6.46027	-0.566995	0.577269	0.739945	-7.5336	2398	2395	2321	2241
CBFB	0.224885	5.69072	3.57796	0.00197347	0.0147229	-2.37656	1274	1299	1455	1468
CBL	0.0464563	4.40139	0.494327	0.626668	0.777679	-7.0172	556	564	521	605
CBLB	-0.170886	3.81744	-1.55725	0.135697	0.293545	-5.76215	405	400	337	358
CBLL1	-0.0194486	6.20301	-0.339424	0.737965	0.851716	-7.58478	2007	1989	1807	2029
CBR1	0.0465978	4.44728	0.475078	0.640076	0.786868	-7.04132	564	591	618	545
CBR4	0.00209175	4.70918	0.0250494	0.980273	0.989281	-7.24001	721	687	652	719
CBS	0.0506035	8.68574	1.35962	0.189663	0.365195	-7.15283	10869	10928	11005	10939
CBWD1	-0.0131862	6.27397	-0.236535	0.815516	0.89925	-7.63149	2171	2019	1962	2072
CBWD2	-0.0687199	5.43268	-0.951973	0.35291	0.548618	-6.98574	1130	1256	1068	1140
CBWD3	0.286753	2.52981	1.60259	0.125305	0.27887	-5.28498	124	159	161	172
CBWD5	-0.519153	3.59541	-3.69986	0.00149287	0.0117946	-1.50725	452	335	259	269
CBWD6	0.260643	3.14651	1.64892	0.115386	0.264409	-5.40982	185	256	238	269
CBWD7	0.382429	0.363275	1.16272	0.259151	0.45135	-5.26193	33	27	36	40
CBX1	0.126868	5.88791	2.13081	0.0462073	0.14131	-5.43281	1564	1489	1580	1660
CBX2	0.139476	5.94508	2.39516	0.0269291	0.0969009	-4.95136	1596	1566	1643	1743
CBX3	-0.0430625	8.20247	-0.97888	0.33978	0.536145	-7.52051	8005	8107	7099	8127
CBX4	0.0993123	6.36459	1.81182	0.0856428	0.216441	-6.08994	2097	2193	2152	2315
CBX5	-0.279226	7.60123	-6.16978	5.91653e-06	0.000134658	3.10542	5651	5877	4392	4846
CBX6	-0.419054	6.42887	-7.37725	5.03776e-07	1.7803e-05	5.84067	2746	2620	2002	1901
CBX7	0.0420931	2.66503	0.249094	0.805926	0.893441	-6.5379	159	177	180	157
CBX8	0.213543	4.63018	2.38374	0.0275777	0.0985804	-4.61225	608	631	643	756
CBY1	-0.0165641	3.12697	-0.118187	0.907144	0.949456	-6.71484	249	224	221	233
CC2D1A	0.00250427	6.42487	0.0434683	0.965776	0.982004	-7.69245	2404	2222	2298	2206
CC2D1B	0.186014	4.68865	2.1302	0.0462642	0.14131	-5.10247	648	653	748	693
CCAR1	0.0745437	7.8208	1.84417	0.0806036	0.207817	-6.30839	6014	5857	5906	6246
CCAR2	-0.0324813	7.84193	-0.741381	0.46741	0.652296	-7.67202	6295	6203	6048	5834
CCBL1	-0.0660067	2.82823	-0.402973	0.691408	0.823529	-6.53919	196	194	202	163
CCBL2	-0.0505913	4.93612	-0.60791	0.550352	0.718402	-7.11642	903	779	763	812
CCDC101	0.0635394	3.98878	0.608308	0.550093	0.718374	-6.81876	432	404	422	427
CCDC104	0.223104	3.81257	2.01501	0.0580837	0.165372	-5.03224	341	359	387	407
CCDC106	-0.285982	3.6945	-2.40344	0.0264681	0.0955781	-4.28185	396	374	280	335
CCDC107	0.175797	1.42591	0.665114	0.513867	0.689605	-5.95986	57	80	85	65
CCDC109B	0.0635769	4.83154	0.783906	0.442633	0.632173	-6.96058	782	719	735	789
CCDC112	-0.0373153	5.25702	-0.521071	0.608259	0.763494	-7.25947	1081	1006	983	993
CCDC113	-0.395564	2.68692	-2.44408	0.0243094	0.0903068	-3.89577	194	203	145	148
CCDC115	-0.0579552	4.04508	-0.53739	0.597155	0.756073	-6.87865	444	462	447	401
CCDC117	0.268241	6.11975	4.61451	0.000183312	0.00230843	-0.109241	1685	1729	1899	2100
CCDC12	0.0243179	5.1383	0.303898	0.764465	0.869501	-7.31882	1006	878	948	912
CCDC121	0.153811	0.299206	0.462315	0.649037	0.793053	-5.77914	29	33	32	35
CCDC124	0.00601448	7.45432	0.137352	0.892179	0.942232	-7.88231	4841	4590	4521	4682
CCDC125	0.0837992	4.62791	0.994213	0.332451	0.528276	-6.71101	643	650	654	678
CCDC126	0.36908	2.45768	2.07754	0.0513675	0.152034	-4.50177	121	139	166	160
CCDC127	-0.0122523	3.90539	-0.114233	0.910236	0.950909	-6.97569	404	406	371	410
CCDC130	0.151357	4.64735	1.74679	0.0966088	0.234368	-5.73967	616	665	692	690
CCDC132	-0.0567022	5.18342	-0.787108	0.440801	0.630428	-7.0603	982	1014	913	952
CCDC134	-0.117081	2.72723	-0.665723	0.513486	0.689316	-6.36333	214	160	177	156
CCDC136	-0.715026	1.00254	-2.44164	0.024434	0.0905255	-3.49021	80	59	34	48
CCDC137	-0.0421308	6.02776	-0.726687	0.476161	0.658745	-7.33132	1757	1809	1669	1697
CCDC138	0.243785	4.92467	3.08221	0.00606565	0.033815	-3.2645	780	724	827	904
CCDC14	-0.340048	6.87032	-6.86763	1.39132e-06	4.10902e-05	4.71518	3473	3620	2640	2806
CCDC142	0.45419	2.6436	2.54755	0.0195334	0.0774096	-3.68393	123	167	194	188
CCDC15	-0.114093	4.3516	-1.21655	0.238481	0.425384	-6.38234	565	578	522	505
CCDC150	-0.0208149	3.51778	-0.169475	0.867191	0.927936	-6.83832	303	318	282	313
CCDC152	-0.357279	2.35553	-1.81176	0.0856524	0.216441	-4.91202	172	141	99	140
CCDC154	0.509717	-0.108668	1.37685	0.18436	0.358209	-4.9255	19	22	27	30
CCDC157	-0.307914	1.31187	-1.12825	0.273079	0.467468	-5.52756	60	91	61	55
CCDC159	0.32227	1.62413	1.28036	0.21563	0.398027	-5.4421	86	63	105	77
CCDC163P	-0.490509	0.909734	-1.73813	0.0981559	0.237011	-4.64636	58	61	41	41
CCDC167	-0.153575	4.31925	-1.60724	0.124277	0.277265	-5.85039	577	557	462	530
CCDC169	-0.130665	3.10833	-0.923712	0.367069	0.561629	-6.28248	248	237	222	209
CCDC17	-0.123011	1.06311	-0.451718	0.656519	0.797999	-5.97694	64	53	49	55
CCDC171	-0.269843	0.344433	-0.795326	0.43612	0.62684	-5.58974	32	43	26	34
CCDC174	0.0700467	4.32612	0.721765	0.479114	0.660691	-6.85126	562	494	515	561
CCDC18	-0.381159	4.74692	-4.4196	0.000286097	0.00327677	-0.205123	785	867	611	620
CCDC183	0.565176	0.43447	1.69899	0.105423	0.248749	-4.60579	27	32	49	37
CCDC183-AS1	-0.10539	1.26135	-0.375865	0.711127	0.836334	-6.06253	52	85	61	59
CCDC23	0.0235157	3.3435	0.169681	0.867031	0.927845	-6.77986	289	254	238	300
CCDC24	-0.225775	1.26682	-0.834889	0.414021	0.606318	-5.79064	59	82	63	53
CCDC25	0.00109282	6.81243	0.0225913	0.982209	0.990216	-7.77262	3077	2976	2874	3014
CCDC27	-1.51373	-0.0111538	-3.81605	0.00114355	0.00964936	-0.767494	57	35	13	17
CCDC28A	0.127795	4.57606	1.47239	0.157075	0.323381	-6.1248	600	629	630	675
CCDC28B	-0.06191	3.76493	-0.531374	0.601237	0.759267	-6.78949	402	347	349	347
CCDC34	0.126371	4.96587	1.64126	0.116978	0.266874	-5.99695	802	809	816	894
CCDC39	-0.284137	2.75304	-1.79657	0.0881117	0.22045	-5.05733	195	205	154	165
CCDC40	0.141736	-0.415492	0.30368	0.764629	0.869575	-5.6755	12	29	27	15
CCDC41	0.076599	5.18508	1.06785	0.298794	0.494691	-6.8001	948	960	945	1011
CCDC43	-0.183186	5.09656	-2.42382	0.025364	0.0927794	-4.66946	990	974	789	894
CCDC47	0.0822007	7.63267	1.91693	0.0702088	0.188174	-6.15642	5353	5042	5246	5447
CCDC50	-0.163482	5.78705	-2.49578	0.0218005	0.0836158	-4.71489	1630	1518	1401	1332
CCDC51	0.0747309	4.58715	0.876563	0.39153	0.585685	-6.80862	636	625	628	663
CCDC53	0.0425831	2.40564	0.222803	0.826036	0.904512	-6.4606	165	119	133	148
CCDC57	-0.331496	4.30543	-3.41882	0.00283709	0.0193891	-2.34504	572	623	460	462
CCDC58	0.250951	4.87452	2.95957	0.00797043	0.0410229	-3.51278	742	707	767	913
CCDC59	0.00642437	5.96551	0.0981051	0.922863	0.958084	-7.58485	1748	1614	1516	1771
CCDC6	0.110616	7.26859	2.48403	0.0223485	0.0850861	-5.04848	4050	3945	4064	4328
CCDC61	0.0664484	4.84396	0.818315	0.42319	0.614551	-6.93636	775	737	725	815
CCDC66	-0.0108821	5.31426	-0.157933	0.876154	0.932832	-7.40393	1094	1057	1016	1059
CCDC68	-0.147635	2.33459	-0.817161	0.423834	0.614953	-6.12523	145	140	125	125
CCDC69	-0.439307	6.08069	-7.61168	3.19445e-07	1.2192e-05	6.37695	2161	2084	1525	1518
CCDC7	0.238955	0.252617	0.665023	0.513924	0.689605	-5.65895	28	30	43	26
CCDC71	-0.224872	4.80673	-2.6813	0.014662	0.0631923	-4.07266	816	814	626	732
CCDC71L	-0.273391	1.54148	-1.14056	0.268041	0.461648	-5.57735	94	78	73	65
CCDC77	0.24091	3.77625	2.16488	0.0431589	0.134964	-4.75489	339	339	385	394
CCDC78	0.31795	3.45928	2.48629	0.0222421	0.0847388	-4.04887	248	283	315	327
CCDC82	0.00317865	4.85255	0.0404048	0.968186	0.983006	-7.2827	782	772	734	780
CCDC84	0.0265219	3.38192	0.196829	0.846024	0.914836	-6.78764	275	280	297	255
CCDC85B	0.117184	5.5246	1.78431	0.0901417	0.223668	-5.93109	1171	1210	1219	1291
CCDC85C	-0.644104	3.38502	-4.81437	0.000116413	0.00160088	1.05819	353	349	234	204
CCDC86	0.0285335	6.52556	0.517386	0.610781	0.765383	-7.57516	2563	2354	2450	2422
CCDC88A	-0.191325	7.19102	-4.22896	0.00044288	0.00463977	-1.20579	4228	4184	3456	3707
CCDC88B	-1.02407	1.52889	-4.25483	0.000417358	0.00443721	0.137198	117	104	53	52
CCDC88C	-0.121176	6.59637	-2.34738	0.0297396	0.104206	-5.1857	2722	2713	2441	2417
CCDC9	0.060903	5.19611	0.815743	0.424625	0.615813	-7.04094	926	1009	950	1010
CCDC90B	0.053563	4.37508	0.57826	0.569791	0.734306	-6.96243	532	565	542	564
CCDC91	-0.0807107	4.75615	-0.927883	0.364956	0.559638	-6.81334	803	697	661	715
CCDC92	-0.481819	1.5182	-1.93925	0.0672684	0.182581	-4.47497	97	85	52	76
CCDC93	0.0754029	5.12411	0.988546	0.335147	0.530995	-6.86365	886	944	950	924
CCDC94	0.0496922	5.14388	0.647314	0.525072	0.698894	-7.15154	992	882	941	942
CCDC97	0.28263	5.96711	4.56624	0.000204637	0.00250327	-0.185615	1539	1515	1853	1761
CCHCR1	0.0375538	5.22095	0.49418	0.62677	0.777679	-7.26358	1057	929	984	994
CCM2	-0.118917	4.90798	-1.43443	0.167495	0.336182	-6.27595	901	787	747	761
CCNA2	-0.0534535	8.09328	-1.35023	0.192602	0.3688	-7.08042	7628	7363	6764	7281
CCNB1	-0.0186444	8.19132	-0.491215	0.628827	0.778518	-7.8842	7983	7867	7420	7790
CCNB1IP1	0.124478	4.73291	1.31047	0.205457	0.38491	-6.38664	631	746	672	784
CCNB2	-0.0330903	6.98086	-0.691079	0.497765	0.677375	-7.55781	3414	3470	3138	3404
CCNB3	-1.42783	-0.0560673	-3.78047	0.00124088	0.0102737	-0.83866	44	40	17	13
CCNC	0.0909399	6.93145	1.907	0.071555	0.190793	-6.04718	3212	3160	3174	3425
CCND1	0.258493	7.14646	5.50127	2.50861e-05	0.000456928	1.70556	3505	3472	4085	4029
CCND2	-0.0879273	7.46614	-1.6987	0.105478	0.24883	-6.48184	5035	4785	4675	4315
CCND3	-0.728028	7.90752	-18.0971	1.51005e-13	9.64467e-11	21.1109	8467	8183	4777	4993
CCNDBP1	-0.239753	5.48964	-3.43318	0.00274589	0.0189222	-2.64761	1346	1283	1115	1051
CCNE1	-0.175941	6.14247	-2.5078	0.021253	0.0821508	-4.77569	2032	2015	1549	1951
CCNE2	-0.126723	5.05512	-1.7005	0.105134	0.248256	-5.9316	946	925	801	865
CCNF	-0.0257972	6.80469	-0.512481	0.614144	0.768005	-7.63432	2964	3114	2863	2938
CCNG1	-0.0331677	6.63374	-0.664399	0.514315	0.690055	-7.50778	2734	2677	2526	2614
CCNG2	-0.103264	2.32511	-0.502431	0.621062	0.77346	-6.33065	161	121	105	151
CCNH	0.0368875	6.18045	0.640258	0.529552	0.702595	-7.42731	1947	1911	1814	2037
CCNI	0.0114386	7.63945	0.238122	0.814302	0.89879	-7.89418	5265	5433	5388	5099
CCNJ	0.130616	4.88882	1.64629	0.11593	0.265165	-5.96684	763	762	768	856
CCNK	0.0414992	6.75642	0.829762	0.416844	0.609086	-7.40652	2815	2927	2812	2931
CCNL1	-0.333338	6.67971	-6.63156	2.25402e-06	6.0538e-05	4.25489	3152	3048	2305	2479
CCNL2	0.00178081	6.9391	0.0322554	0.9746	0.986048	-7.79702	3175	3435	3289	3142
CCNT1	-0.0969038	6.36307	-1.62702	0.119988	0.271485	-6.37823	2227	2362	1944	2231
CCNT2	-0.140907	5.79603	-2.32228	0.0313229	0.108105	-5.05395	1579	1563	1377	1393
CCNY	-0.0618851	6.12322	-1.10815	0.281451	0.475823	-7.00227	1941	1895	1763	1809
CCNYL1	0.0596606	3.3709	0.430577	0.671558	0.808503	-6.70816	263	283	242	314
CCP110	0.160967	6.21232	2.81152	0.011045	0.0521319	-4.17283	1842	1937	1967	2140
CCPG1	0.315507	3.26551	2.30623	0.0323756	0.110691	-4.33263	252	213	273	288
CCR10	-0.909693	2.47213	-5.12093	5.83618e-05	0.000901036	1.90955	198	211	103	108
CCR4	-0.61661	0.544247	-1.92492	0.0691432	0.186284	-4.28698	43	54	27	34
CCR7	-1.6646	0.391491	-4.89252	9.75502e-05	0.00137822	1.37263	61	64	16	22
CCRL2	0.292597	2.63772	1.75989	0.094306	0.230724	-5.08081	146	156	186	174
CCRN4L	-0.0472603	4.15187	-0.465177	0.647023	0.791799	-6.95088	468	505	465	450
CCS	0.0475468	4.73273	0.536131	0.598008	0.756522	-7.09824	729	679	743	674
CCSAP	0.306016	3.5547	1.99599	0.0602775	0.169851	-4.98151	234	346	312	373
CCSER2	0.111462	3.19669	0.804872	0.430722	0.621458	-6.41495	224	251	249	249
CCT2	0.125623	9.17439	3.79866	0.00119013	0.00996786	-2.48953	14950	14852	15487	16118
CCT3	0.144666	9.46517	4.41324	0.000290289	0.00330187	-1.11703	17975	18242	19281	19633
CCT4	0.0464846	8.79597	1.23903	0.230229	0.415335	-7.31935	11989	11575	11910	11744
CCT5	0.146392	8.94227	3.95779	0.000825738	0.00751464	-2.09429	13027	12176	13444	13656
CCT6A	0.07957	9.31106	2.37075	0.0283324	0.100698	-5.57455	16792	16502	16441	17771
CCT6B	0.208446	0.34605	0.601342	0.554627	0.72104	-5.71926	28	35	43	29
CCT6P1	-0.159144	3.32487	-1.17505	0.254302	0.445279	-6.09515	285	285	222	276
CCT6P3	0.103919	1.74251	0.467567	0.645343	0.790271	-6.16418	91	82	95	86
CCT7	0.0996369	9.08873	2.76987	0.0120972	0.0552043	-4.74256	14154	14181	14860	14654
CCT8	0.105324	9.36062	3.15654	0.00513468	0.0300003	-3.95333	17255	16897	17173	18552
CCT8P1	0.110427	1.39763	0.417404	0.681001	0.815833	-6.08489	56	82	78	65
CCZ1	-0.0251138	3.43022	-0.176352	0.861859	0.924339	-6.80766	296	288	318	246
CCZ1B	0.111275	4.961	1.33701	0.196805	0.374183	-6.4205	756	861	846	848
CD151	-0.345083	6.11105	-6.09707	6.9048e-06	0.000151053	3.22204	2146	2051	1575	1636
CD164	-0.074813	8.98528	-1.93962	0.0672198	0.182512	-6.31564	13827	14201	12229	13663
CD247	-0.19827	2.10346	-0.835445	0.413715	0.606086	-6.03625	112	137	77	141
CD27-AS1	-0.0881056	-0.0266811	-0.233158	0.818099	0.900178	-5.77951	34	21	26	23
CD274	-0.336995	1.68411	-1.1226	0.275412	0.469969	-5.63622	146	64	71	78
CD2AP	-0.131421	7.27884	-2.83926	0.0103934	0.0497377	-4.32499	4376	4381	3690	4087
CD2BP2	0.0988931	5.63367	1.5648	0.133918	0.290812	-6.29664	1283	1301	1310	1380
CD320	0.230239	6.93853	4.77615	0.000126944	0.00171527	0.0974268	3051	3049	3485	3471
CD36	0.0326521	8.69329	0.886561	0.386256	0.580741	-7.67655	11264	10792	10563	11371
CD37	-0.249097	3.94196	-2.24358	0.036806	0.121034	-4.66201	450	451	391	348
CD3EAP	0.0821695	4.30432	0.838815	0.411867	0.604202	-6.75173	549	486	539	525
CD44	-0.256013	5.65249	-3.83987	0.00108269	0.00926825	-1.77268	1515	1445	1237	1174
CD46	0.00111987	7.38709	0.0255165	0.979906	0.989075	-7.87989	4463	4552	4266	4504
CD47	-0.177229	6.5579	-3.30736	0.00365386	0.0233501	-3.17589	2691	2707	2188	2457
CD55	-0.0855429	5.38092	-1.21783	0.238002	0.424906	-6.68653	1211	1103	1030	1088
CD58	-0.492801	4.64953	-5.78671	1.34498e-05	0.000264392	2.89761	791	812	552	555
CD59	-0.140275	7.23324	-3.04853	0.0065396	0.0355933	-3.87098	4351	4161	3602	3907
CD63	-0.0831661	6.68686	-1.53722	0.140512	0.300813	-6.57744	2948	2768	2464	2785
CD70	-0.993155	0.414053	-2.77153	0.0120536	0.0550897	-2.79191	61	41	31	19
CD81	0.301139	6.60927	5.28059	4.08717e-05	0.000678679	1.30867	2331	2406	2931	2747
CD82	0.0467278	7.44085	1.07983	0.293559	0.489072	-7.29522	4605	4604	4588	4658
CD83	0.398864	3.77605	3.52194	0.0022429	0.0163268	-1.96025	333	309	415	408
CD97	-0.260428	6.24446	-4.53491	0.000219805	0.00263681	-0.317891	2186	2284	1830	1797
CD99	-0.189261	6.64906	-3.73038	0.00139198	0.0112045	-2.24467	2885	2887	2462	2459
CD99L2	-0.25149	4.3282	-2.38669	0.0274085	0.0981736	-4.51272	537	648	484	479
CD99P1	-0.380081	1.12391	-1.29988	0.208989	0.389118	-5.28502	52	85	50	49
CDADC1	0.155052	3.42123	1.23668	0.23108	0.416374	-6.05585	271	275	289	302
CDAN1	0.139162	6.1504	2.5024	0.0214975	0.0828123	-4.789	1811	1835	1906	1997
CDC123	0.0762905	7.02337	1.56907	0.13292	0.289397	-6.59718	3446	3378	3539	3456
CDC14A	0.175679	3.83611	1.54457	0.138729	0.298232	-5.78716	375	348	414	381
CDC14B	0.159628	2.5964	0.795659	0.435931	0.626714	-6.22638	124	191	146	190
CDC16	-0.241182	7.11661	-5.17184	5.20808e-05	0.000826409	0.96823	3997	4132	3272	3412
CDC20	-0.0105319	7.68542	-0.251752	0.803901	0.892126	-7.89825	5593	5536	5354	5385
CDC23	0.0333113	6.08277	0.558155	0.583172	0.74474	-7.45549	1792	1818	1686	1909
CDC25A	0.0850963	6.57058	1.62494	0.120435	0.272058	-6.42517	2479	2493	2439	2691
CDC25B	-0.518051	6.71264	-10.3951	2.44802e-09	2.34046e-07	11.2771	3448	3314	2261	2328
CDC25C	0.269722	3.73773	2.20751	0.039603	0.127215	-4.66467	331	322	414	355
CDC26	0.201451	3.40399	1.46456	0.159179	0.325925	-5.75804	246	286	317	278
CDC27	-0.223375	7.63382	-5.1422	5.5649e-05	0.000870455	0.812601	5915	5650	4608	5024
CDC34	-0.00247973	6.18375	-0.041342	0.967449	0.982659	-7.63992	2073	1852	1842	1962
CDC37	0.113736	8.63936	3.0319	0.00678668	0.0366806	-4.12592	10607	10051	10793	10927
CDC37L1	0.0700857	4.17122	0.60137	0.554609	0.72104	-6.88262	502	447	416	559
CDC40	-0.0118204	6.06701	-0.209274	0.836433	0.910105	-7.59103	1812	1814	1705	1791
CDC42	-0.0304153	7.89474	-0.735053	0.471167	0.654971	-7.68512	6594	6366	5904	6436
CDC42BPA	-0.0889436	7.02545	-1.7877	0.0895776	0.222893	-6.26138	3672	3568	3113	3511
CDC42BPB	-1.03383	2.83855	-5.93542	9.75732e-06	0.00020307	3.60385	302	250	147	116
CDC42BPG	-1.29551	3.13068	-8.83196	3.35424e-08	1.96254e-06	9.10601	384	355	139	153
CDC42EP2	1.14288	1.1217	4.03315	0.000694437	0.00654047	-0.307654	42	36	96	74
CDC42EP4	-0.899738	4.69032	-8.94831	2.73281e-08	1.64552e-06	9.18226	1006	894	542	452
CDC42P6	0.268107	0.364469	0.75075	0.461881	0.647145	-5.62746	27	36	27	49
CDC42SE1	-0.29516	6.28681	-4.47274	0.000253348	0.00296464	-0.469276	2523	2149	1861	1830
CDC42SE2	0.101802	5.91647	1.63901	0.11745	0.267577	-6.25879	1652	1492	1612	1664
CDC45	-0.048392	5.97497	-0.826894	0.418428	0.610437	-7.23956	1705	1740	1610	1628
CDC5L	0.0221033	7.07172	0.468634	0.644594	0.789527	-7.70807	3649	3544	3396	3707
CDC6	0.0220326	6.17848	0.395155	0.697072	0.827732	-7.55809	1943	1928	1910	1911
CDC7	-0.0788609	5.99671	-1.26204	0.222008	0.406164	-6.7942	1766	1770	1509	1751
CDC73	-0.0309805	6.15452	-0.529932	0.602217	0.759546	-7.48783	1879	2002	1777	1914
CDCA2	-0.203868	6.50478	-3.82578	0.00111828	0.00950205	-1.99861	2580	2670	2217	2213
CDCA3	-0.244863	5.55966	-3.74414	0.00134875	0.0109274	-1.96647	1367	1398	1133	1135
CDCA4	0.00783204	5.85029	0.131521	0.896727	0.944635	-7.55249	1552	1547	1472	1557
CDCA5	0.14357	6.94934	2.9032	0.00902897	0.0450142	-4.12977	3189	3144	3446	3356
CDCA7	0.0272799	6.9909	0.579992	0.568646	0.733363	-7.63245	3394	3394	3243	3483
CDCA7L	-0.0893704	5.83575	-1.49387	0.151419	0.315633	-6.44989	1582	1591	1415	1484
CDCA8	-0.32105	6.74166	-6.54484	2.69609e-06	6.96524e-05	4.05975	3249	3194	2478	2535
CDH1	-0.6617	5.91012	-11.1591	7.52263e-10	8.88673e-08	12.625	2042	2032	1224	1279
CDH24	-0.200249	3.70174	-1.72911	0.0997917	0.23984	-5.46656	364	387	304	331
CDH4	0.0264231	0.62353	0.0752375	0.940802	0.968365	-5.96012	41	40	58	28
CDH6	-7.23574e-05	6.50296	-0.00133918	0.998945	0.99924	-7.70998	2413	2472	2403	2346
CDHR1	-0.742524	1.72609	-3.22067	0.00444451	0.0271041	-2.08821	129	102	67	66
CDHR5	-0.389593	1.08201	-1.42951	0.168884	0.338156	-5.11435	71	59	50	46
CDIP1	-0.0887615	6.12414	-1.58393	0.129498	0.284935	-6.38962	1943	1931	1759	1782
CDIPT	0.0503067	5.2348	0.696045	0.494718	0.674562	-7.14391	1026	967	1010	996
CDK1	-0.105077	7.23883	-2.31156	0.0320226	0.109939	-5.37728	4165	4275	3697	3931
CDK10	-0.0887163	6.11143	-1.55386	0.136503	0.294644	-6.43066	1902	1938	1756	1754
CDK11A	-0.337467	1.57973	-1.42448	0.170317	0.340086	-5.24947	94	86	76	63
CDK11B	-0.0424614	5.62034	-0.542371	0.593786	0.753254	-7.34844	1490	1212	1261	1277
CDK12	-0.0808627	7.46511	-1.66623	0.111855	0.259047	-6.53172	4686	5113	4425	4571
CDK13	0.333394	6.2394	6.08618	7.06677e-06	0.000154053	3.17045	1817	1808	2207	2233
CDK15	-0.651005	0.743708	-2.14911	0.0445462	0.137793	-3.9587	64	49	34	35
CDK16	0.0061223	6.62241	0.117609	0.907596	0.949706	-7.72738	2643	2652	2611	2559
CDK17	0.0509004	4.51204	0.535301	0.598571	0.756771	-7.03048	597	609	645	573
CDK19	0.0188166	4.43204	0.203376	0.840975	0.912342	-7.13221	578	577	529	610
CDK2	-0.0327714	5.84141	-0.520887	0.608385	0.763574	-7.41783	1505	1621	1445	1523
CDK20	-0.124752	3.18257	-0.908757	0.374714	0.569393	-6.32075	255	255	213	242
CDK2AP1	0.160265	4.66425	1.88383	0.0747816	0.196857	-5.52265	639	652	711	692
CDK2AP2	-0.166651	4.54363	-1.90493	0.071837	0.191257	-5.44984	675	655	580	572
CDK4	-0.0885936	7.47001	-1.88958	0.0739684	0.195338	-6.17445	5053	4797	4578	4427
CDK5	0.0325143	2.785	0.197484	0.845519	0.914746	-6.58881	190	176	200	166
CDK5R1	0.250371	3.65165	2.0595	0.0532291	0.155647	-4.90299	338	284	353	364
CDK5RAP1	0.0414929	6.12591	0.727349	0.475765	0.658352	-7.35381	1825	1883	1848	1861
CDK5RAP2	0.0234522	7.25133	0.511046	0.615129	0.76885	-7.71961	4133	4010	3843	4206
CDK5RAP3	-0.00701233	6.22855	-0.123605	0.902909	0.947761	-7.64278	2018	2030	1985	1932
CDK6	-0.115011	8.23905	-2.68469	0.0145552	0.0628431	-4.80097	8560	8383	7122	8108
CDK7	0.120431	4.86071	1.42468	0.17026	0.340086	-6.27574	803	701	754	833
CDK8	-0.00685027	6.30109	-0.127398	0.899946	0.946429	-7.6583	2167	2091	2017	2102
CDK9	-0.0196225	5.49313	-0.281576	0.781273	0.880111	-7.42548	1288	1157	1170	1172
CDKAL1	-0.0104659	5.39452	-0.153934	0.879264	0.934488	-7.42706	1118	1156	1071	1123
CDKL1	-0.0184445	3.09245	-0.129203	0.898537	0.945492	-6.70188	244	218	224	219
CDKN1A	-0.299394	0.224014	-0.827177	0.418271	0.610381	-5.53794	38	31	35	21
CDKN1B	0.12486	5.45452	1.74709	0.0965552	0.234286	-5.97118	1090	1174	1127	1273
CDKN1C	-2.67732	2.08698	-11.8274	2.81263e-10	4.25462e-08	12.7281	291	287	42	45
CDKN2A	0.116559	8.83905	3.36472	0.00320824	0.021224	-3.4233	11941	11755	12194	12779
CDKN2AIP	0.182647	6.46781	3.41528	0.00286004	0.0194709	-2.91816	2320	2158	2411	2527
CDKN2AIPNL	0.0041584	4.5726	0.0460913	0.963712	0.981033	-7.19703	633	647	575	675
CDKN2B	-0.343397	1.96815	-1.61738	0.122063	0.27419	-5.09335	106	132	86	95
CDKN2B-AS1	0.248296	0.130326	0.646711	0.525454	0.69927	-5.64227	19	37	35	27
CDKN2C	0.200843	6.32092	3.72847	0.00139808	0.011239	-2.18234	1987	2030	2184	2304
CDKN2D	-0.362179	1.68918	-1.58244	0.129839	0.285417	-5.06473	109	88	74	74
CDKN3	0.0244435	5.04115	0.319692	0.752645	0.862032	-7.28578	858	901	830	909
CDPF1	-0.353692	3.46632	-2.77334	0.0120061	0.0549735	-3.47402	319	354	256	255
CDR2	0.244975	4.98877	3.16298	0.00506094	0.0297741	-3.1076	763	808	900	909
CDR2L	0.221858	0.455159	0.635498	0.532585	0.705027	-5.72506	38	30	28	52
CDRT15P1	-0.272089	0.0395622	-0.764092	0.454076	0.640996	-5.54383	28	32	23	25
CDS2	-0.027941	4.20626	-0.280379	0.782178	0.880491	-7.04008	491	512	492	465
CDT1	0.179511	7.50421	4.01746	0.000719928	0.00673962	-1.74655	4579	4610	5102	5015
CDV3	0.0284019	8.35854	0.74481	0.465382	0.650203	-7.74712	8908	8605	8364	9002
CDYL	0.045898	6.57131	0.86572	0.397304	0.590977	-7.33815	2612	2432	2522	2537
CEBPA	0.100175	-0.00762469	0.242666	0.810831	0.896155	-5.78185	40	16	27	26
CEBPB	0.0627979	4.4008	0.687169	0.500171	0.678849	-6.90011	547	566	543	587
CEBPD	-0.00984586	2.21843	-0.0507119	0.960078	0.979101	-6.42395	140	112	122	120
CEBPG	-0.019721	5.62749	-0.302409	0.765583	0.869956	-7.45567	1351	1329	1306	1265
CEBPZ	0.0153566	7.03353	0.311287	0.758928	0.866189	-7.76483	3619	3405	3281	3622
CEBPZ-AS1	-0.104525	4.7539	-1.2468	0.227427	0.412368	-6.47101	751	756	636	728
CECR5	0.289875	4.97879	3.757	0.00130954	0.0106655	-1.78227	793	743	909	916
CECR7	0.0970082	4.01671	0.876934	0.391334	0.585583	-6.62569	425	418	392	488
CELF1	0.193275	7.16949	4.25434	0.000417822	0.00443721	-1.14392	3629	3624	3894	4169
CELF2	-0.226661	7.61028	-5.24749	4.39954e-05	0.000718998	1.05528	5765	5624	4518	4948
CELF2-AS1	-0.861309	0.353242	-2.39385	0.027003	0.0970575	-3.47272	57	37	19	31
CELSR2	-0.597218	6.14646	-10.2343	3.1633e-09	2.86405e-07	11.1094	2292	2402	1506	1509
CELSR3	-0.288183	3.58887	-2.24536	0.0366728	0.120692	-4.5464	332	385	298	272
CENPA	-0.163608	5.06054	-2.10654	0.0484971	0.145974	-5.25284	935	968	771	882
CENPB	-0.0211306	6.50879	-0.383643	0.705446	0.832816	-7.63418	2493	2447	2423	2312
CENPBD1	-0.380874	1.40824	-1.50935	0.147446	0.310144	-5.09096	83	79	69	53
CENPBD1P1	0.229357	5.18525	3.03341	0.0067638	0.0365729	-3.44224	861	951	1007	1055
CENPC	-0.177665	5.50067	-2.69513	0.0142301	0.0618034	-4.23847	1327	1267	1082	1147
CENPE	-0.285819	6.95982	-5.91541	1.01862e-05	0.000211287	2.65915	3633	3773	2875	3029
CENPF	-0.215035	8.35284	-5.24647	4.40954e-05	0.000719683	0.94175	9286	9697	7582	8321
CENPH	-0.0847143	5.28995	-1.15296	0.26304	0.455855	-6.73631	1044	1128	946	1044
CENPI	0.169733	4.60997	1.8081	0.0862396	0.217422	-5.63042	579	663	697	659
CENPJ	-0.0856298	5.73998	-1.37276	0.185607	0.359901	-6.59006	1461	1505	1308	1409
CENPK	0.0537805	4.74594	0.63805	0.530957	0.703814	-7.04066	749	671	698	733
CENPL	0.0264188	4.79764	0.295814	0.770539	0.872307	-7.2213	694	794	687	784
CENPM	-0.00252806	5.3707	-0.036915	0.970933	0.984103	-7.43214	1134	1096	1082	1082
CENPN	0.00835487	5.51649	0.125846	0.901158	0.947125	-7.46519	1206	1253	1157	1247
CENPO	-0.0778046	5.51186	-1.06784	0.298801	0.494691	-6.891	1264	1259	1224	1105
CENPP	-0.223067	4.50908	-2.51514	0.0209253	0.0811879	-4.31819	666	658	558	545
CENPQ	0.334764	3.82326	2.86561	0.00980874	0.0476754	-3.39405	318	362	386	447
CENPT	-0.0183085	5.81543	-0.295539	0.770746	0.872307	-7.50698	1553	1499	1481	1449
CENPU	-0.10955	6.48631	-2.11531	0.0476585	0.144114	-5.59461	2499	2517	2235	2284
CENPV	0.158769	5.44488	2.29907	0.0328558	0.111778	-5.0059	1076	1145	1205	1204
CENPW	0.199799	5.62596	2.99268	0.00740575	0.0389551	-3.64852	1270	1213	1299	1476
CEP104	0.199035	5.88421	3.27111	0.00396614	0.024859	-3.10843	1462	1507	1663	1650
CEP120	-0.0140569	5.05869	-0.16695	0.869151	0.929151	-7.32952	890	915	780	964
CEP128	-0.00188312	4.70537	-0.0198393	0.984376	0.991384	-7.23896	695	712	603	770
CEP135	0.0784202	4.93702	0.971983	0.343113	0.539097	-6.8256	812	794	764	887
CEP152	0.114776	5.99716	1.87958	0.0753876	0.198284	-5.89598	1594	1715	1675	1806
CEP164	-0.453696	5.97953	-7.52307	3.79137e-07	1.39965e-05	6.22228	2024	1955	1333	1493
CEP170	-0.0216501	5.8697	-0.341214	0.736638	0.850784	-7.50537	1656	1519	1537	1502
CEP170B	-0.458459	3.19132	-3.2154	0.00449758	0.0273046	-2.4589	276	300	216	192
CEP19	0.172749	2.05689	0.855648	0.402716	0.595875	-6.00579	107	103	123	108
CEP192	-0.248458	5.33743	-3.57152	0.00200272	0.0148931	-2.29743	1164	1210	942	1000
CEP250	-0.274692	6.66638	-5.46923	2.69196e-05	0.000485335	1.72262	2984	3034	2391	2444
CEP290	0.00364341	5.00698	0.0408778	0.967814	0.982869	-7.32831	855	876	744	952
CEP350	-0.0982911	6.89797	-1.9737	0.0629421	0.174778	-5.92689	3274	3375	2878	3162
CEP41	-0.249764	3.754	-2.0442	0.0548552	0.159173	-4.9614	406	385	353	297
CEP44	0.0515861	5.19976	0.647528	0.524937	0.69879	-7.16742	911	1038	928	1032
CEP55	-0.00226697	4.38822	-0.0244087	0.980778	0.989281	-7.13953	553	575	555	540
CEP57	0.104104	6.39164	1.96621	0.0638612	0.176479	-5.83753	2215	2148	2204	2355
CEP57L1	0.0805351	5.41473	1.11685	0.277804	0.471974	-6.81164	1069	1168	1090	1208
CEP63	-0.183167	4.56816	-2.10756	0.0483987	0.145784	-5.10597	699	662	582	583
CEP68	-0.249553	4.13516	-2.51326	0.0210087	0.0813842	-4.20647	516	515	422	421
CEP70	0.181469	3.81862	1.63871	0.117512	0.267646	-5.6436	368	345	394	392
CEP72	-0.0904565	4.42873	-0.977726	0.340336	0.536818	-6.66458	576	621	547	545
CEP76	0.085409	3.52728	0.659381	0.517461	0.693077	-6.63281	282	321	327	295
CEP78	0.0852233	5.55638	1.17884	0.252828	0.443262	-6.78087	1229	1233	1157	1389
CEP85	0.00876917	6.64638	0.172103	0.865153	0.926519	-7.72404	2690	2689	2638	2623
CEP85L	-0.26462	4.2961	-2.65677	0.0154593	0.0655133	-3.9689	575	585	426	515
CEP89	-0.0358262	4.02393	-0.342521	0.73567	0.849888	-6.96043	447	439	432	409
CEP95	0.0513558	5.47473	0.723152	0.478281	0.660061	-7.19139	1248	1108	1187	1183
CEP97	0.0183699	4.54039	0.211281	0.834888	0.909764	-7.16489	625	620	588	638
CEPT1	0.116313	4.99333	1.51585	0.145804	0.307525	-6.18839	835	812	876	860
CERCAM	-0.864342	3.07512	-5.68958	1.66102e-05	0.000317463	3.04643	311	300	180	148
CERK	0.128563	2.81211	0.794471	0.436606	0.62703	-6.29673	190	171	207	178
CERKL	0.0484287	6.1848	0.822014	0.421133	0.612395	-7.29266	1889	1964	1972	1902
CERS2	-0.12195	6.75924	-2.49398	0.0218836	0.0837533	-4.93283	3069	3018	2693	2744
CERS4	-0.532009	1.00591	-1.90327	0.0720655	0.191701	-4.4141	66	63	48	39
CERS5	0.132599	4.27146	1.37363	0.18534	0.359494	-6.16191	482	511	533	525
CERS6	-0.0670268	4.94078	-0.825604	0.419142	0.610981	-6.95866	871	823	728	846
CES2	-0.094098	5.3532	-1.37399	0.18523	0.359393	-6.48373	1146	1128	1033	1038
CES3	-0.831456	1.26608	-3.07593	0.00615134	0.0341392	-2.30673	76	97	52	42
CETN2	-0.0464543	4.10195	-0.457185	0.652655	0.795082	-6.93838	492	448	437	447
CETN3	0.212049	3.66314	1.67015	0.111067	0.257684	-5.54563	311	323	313	405
CFD	-0.50089	3.49924	-3.77151	0.00126664	0.0104078	-1.32042	331	396	237	260
CFDP1	0.11137	4.53602	1.21416	0.23937	0.426307	-6.44383	567	637	608	654
CFL1	0.0338947	9.04966	0.974344	0.34197	0.538361	-7.64324	14271	13945	14006	14071
CFL2	0.115264	3.75156	0.987269	0.335756	0.531622	-6.43596	339	358	337	398
CFLAR	0.0421994	5.40459	0.629184	0.536624	0.707889	-7.23694	1122	1126	1105	1145
CGGBP1	0.044207	6.65125	0.885058	0.387046	0.581506	-7.33749	2653	2679	2629	2715
CGREF1	0.0208197	4.78201	0.244382	0.809521	0.895294	-7.23109	748	722	755	697
CGRRF1	-0.157345	2.50294	-0.902829	0.377774	0.572429	-6.10573	168	154	128	153
CHAC1	0.542872	3.5567	4.43681	0.000275044	0.00317362	0.161989	277	248	362	381
CHAC2	0.0283739	4.49176	0.299424	0.767825	0.871009	-7.12599	573	627	617	573
CHAF1A	0.010985	7.55117	0.258049	0.799107	0.889539	-7.87399	5078	4987	4902	4956
CHAF1B	0.0746719	5.92055	1.25766	0.223557	0.40793	-6.78148	1570	1609	1617	1637
CHAMP1	-0.257731	6.84438	-4.96626	8.2603e-05	0.00120118	0.550371	3273	3499	2739	2763
CHCHD1	0.141004	5.01233	1.64141	0.116947	0.266853	-6.0101	790	868	807	973
CHCHD10	0.14704	6.60468	2.91394	0.00881734	0.0442436	-4.03952	2527	2455	2648	2714
CHCHD2	0.069432	8.56653	1.80853	0.0861709	0.217422	-6.47658	9853	10090	9730	10621
CHCHD3	0.0473366	7.52174	0.999409	0.329993	0.525649	-7.39241	4925	4812	5017	4769
CHCHD4	0.000149231	5.16361	0.00178994	0.99859	0.999038	-7.37438	990	942	839	1047
CHCHD5	-0.0754556	3.94725	-0.713488	0.484104	0.665354	-6.73389	421	431	394	392
CHCHD6	0.195689	3.59395	1.62973	0.11941	0.270533	-5.58394	314	293	343	333
CHCHD7	0.0322246	5.48935	0.443484	0.662359	0.80163	-7.3634	1181	1213	1090	1295
CHD1	-0.0432628	6.91996	-0.859439	0.400673	0.59435	-7.41322	3254	3370	2966	3286
CHD1L	0.0143956	7.15711	0.3189	0.753236	0.862292	-7.78542	3869	3782	3661	3851
CHD2	0.0748069	7.09778	1.63897	0.117459	0.267577	-6.50723	3589	3601	3608	3753
CHD3	-0.341142	6.86909	-6.78777	1.63662e-06	4.69923e-05	4.54872	3544	3542	2759	2680
CHD4	-0.476312	8.97751	-12.7091	8.18561e-11	1.56622e-08	14.4864	16469	15571	11246	11134
CHD5	0.748377	0.0224694	2.03552	0.0557976	0.160919	-4.02714	17	25	32	36
CHD6	-0.145801	5.44695	-2.15988	0.0435949	0.135888	-5.26436	1263	1208	1088	1083
CHD7	0.00622112	7.73332	0.132257	0.896153	0.944429	-7.93014	5758	5684	5196	5995
CHD8	-0.00265457	7.18667	-0.0556471	0.956196	0.976749	-7.84244	3815	4044	3711	3911
CHD9	-0.150028	6.43406	-2.37851	0.0278792	0.0994573	-5.09214	2426	2483	1949	2366
[truncated: 11,747 more rows]

## Sheet: 12h_down
Supplemental Table 5: The RNA transcriptome analysis of AID-KMT2D HUDEP-2 cells with 5-Ph-IAA treatment for 6 hours, 12 hours and 24 hours vs. without 5-Ph-IAA treatment grown in the expansion culture.
gene_name	logFC	AveExpr	t	P.Value	adj.P.Val	B	C25_D6_1	C25_D6_2	C25_I12_1	C25_I12_2
ABCA11P	-0.742996	0.232015	-2.15716	0.0438335	0.136439	-3.86033	39	42	20	27
ABCA2	-0.734105	3.71086	-5.57082	2.15327e-05	0.000399241	2.66096	487	425	228	308
ABCA7	-0.97298	5.97309	-15.419	2.72532e-12	1.0564e-09	18.3519	2287	2457	1150	1197
ABCB9	-0.857697	2.00034	-4.13293	0.00055215	0.00553668	-0.178189	147	142	82	73
ABCD1	-0.778392	1.05195	-2.69762	0.0141536	0.0615786	-3.01908	65	81	48	35
ABCG2	-0.876259	2.88398	-5.01683	7.3716e-05	0.00109375	1.61802	311	232	150	135
AC006116.20	-0.75147	0.149927	-2.11943	0.0472686	0.14331	-3.91017	43	34	24	20
AC009005.2	-1.29143	1.37683	-4.49156	0.000242679	0.0028614	0.646946	91	131	34	54
AC013474.4	-0.783146	0.00274129	-2.09464	0.0496567	0.148452	-3.92911	29	42	20	19
AC016629.3	-0.803366	2.88039	-4.44779	0.000268225	0.00311815	0.356094	257	265	180	118
AC022400.1	-0.892539	-0.146187	-2.3085	0.0322254	0.11036	-3.55898	38	28	19	15
AC090616.2	-1.4069	-0.549493	-3.34437	0.00335987	0.0219693	-1.69516	28	31	11	10
AC092811.1	-0.590773	1.05225	-2.11776	0.0474257	0.14369	-4.07192	76	61	39	49
AC109309.4	-3.8031	-0.34953	-8.39037	7.41442e-08	3.64954e-06	5.94687	77	80	5	5
ACACB	-0.837492	2.52419	-4.44913	0.000267405	0.00311153	0.430502	187	229	98	128
ACAP1	-1.82423	0.484921	-5.33886	3.59114e-05	0.000607701	2.2374	62	80	20	18
ACHE	-1.30885	3.5295	-9.65637	8.13915e-09	6.11867e-07	10.4973	510	468	209	176
ACSF2	-0.836174	-0.289332	-2.09395	0.0497247	0.148551	-3.89232	29	29	12	20
ACSL5	-0.775264	2.154	-3.81937	0.00113487	0.00960228	-0.887432	147	166	97	81
ACSS1	-0.727608	6.01773	-12.3413	1.35828e-10	2.44175e-08	14.3616	2255	2235	1326	1310
ACSS2	-0.621337	5.05701	-7.20412	7.08616e-07	2.39501e-05	5.79066	1136	1086	760	650
ACTR3C	-0.6813	1.14042	-2.50057	0.0215807	0.0830296	-3.40729	81	69	39	52
ADAM32	-0.619762	1.3281	-2.31612	0.0317231	0.109122	-3.78256	84	83	41	67
ADAM8	-1.10792	2.17443	-5.27639	4.12551e-05	0.000683216	2.27352	169	187	93	69
ADAMTSL4	-1.35672	3.94685	-12.1679	1.73168e-10	2.90267e-08	14.264	665	664	240	264
AGRN	-1.96709	6.52628	-30.7264	7.94128e-18	3.28346e-14	30.9207	5016	4798	1297	1149
AHNAK	-1.99467	7.13871	-37.0398	2.30299e-19	2.00611e-15	34.3985	7562	7600	1701	2005
AHNAK2	-5.30211	0.566699	-11.7187	3.29088e-10	4.80237e-08	9.42618	230	271	8	4
AIFM2	-0.678164	4.36603	-6.57514	2.53224e-06	6.65464e-05	4.65871	758	651	393	462
AKR1C1	-1.14874	0.0460917	-2.88339	0.00943215	0.0463771	-2.55214	37	45	26	12
AKR1E2	-0.622854	1.48003	-2.36659	0.0285782	0.101223	-3.72383	96	90	44	77
AKTIP	-0.729874	0.717168	-2.42933	0.025073	0.0922044	-3.4644	56	57	35	31
ALDH3B1	-0.799531	5.18356	-10.1862	3.41735e-09	3.0063e-07	11.205	1317	1264	757	687
ALMS1-IT1	-1.19737	-0.468171	-2.93062	0.00849812	0.0429371	-2.44827	30	28	12	12
ALPL	-1.27046	-0.168328	-3.19374	0.00472257	0.0282938	-1.96403	30	45	14	15
AMHR2	-2.43446	0.412595	-6.93383	1.2169e-06	3.6637e-05	4.92694	78	88	15	14
AMPD3	-0.689449	3.80693	-6.00466	8.41071e-06	0.000178032	3.57715	483	473	301	276
ANKRD36C	-0.697107	3.20737	-4.42331	0.000283677	0.00325808	0.225189	281	357	168	213
ANO8	-0.991776	3.05792	-6.50894	2.90441e-06	7.35232e-05	4.76427	301	331	164	145
ANXA5	-0.793368	4.21896	-7.81118	2.1805e-07	9.01563e-06	7.16556	694	627	373	367
AP3B2	-1.12366	-0.248141	-2.89737	0.00914575	0.0453594	-2.51326	33	33	13	16
APH1B	-0.644803	1.38633	-2.26161	0.0354773	0.117947	-3.8921	100	77	39	75
APOBEC3F	-0.942317	1.10058	-3.41705	0.00284852	0.0194244	-1.58784	72	88	39	41
APOBEC3G	-0.799278	2.52646	-4.06079	0.000651694	0.00624699	-0.429282	239	174	125	104
APOBR	-1.38373	1.33338	-5.17672	5.15167e-05	0.000821354	2.06514	111	107	48	34
APOC1	-0.712207	2.26352	-3.41748	0.00284576	0.01942	-1.78064	147	186	82	116
APOL1	-1.11462	3.90853	-10.0092	4.5506e-09	3.83984e-07	11.0686	598	592	252	282
AQP1	-2.66005	-0.408013	-6.11154	6.69545e-06	0.000147514	3.13491	0	0	0	0
AQP1	-2.66005	-0.408013	-6.11154	6.69545e-06	0.000147514	3.13491	49	52	9	6
AQP3	-1.92052	5.23398	-24.3344	6.35292e-16	1.57603e-12	26.4118	2012	1934	479	534
ARHGAP22	-2.04314	0.428997	-5.71267	1.5796e-05	0.000302834	2.89928	86	62	19	15
ARHGAP23	-1.06327	5.1372	-14.0342	1.44844e-11	3.66663e-09	16.7335	1396	1345	606	669
ARHGAP39	-0.968676	2.38011	-5.13321	5.67803e-05	0.000883693	1.94783	200	191	107	88
ARHGAP44	-0.795572	0.108471	-2.22945	0.0378798	0.123388	-3.72257	34	42	19	23
ARHGEF19	-0.65404	1.68452	-2.75468	0.0125044	0.0563401	-3.02881	105	111	78	57
ARHGEF37	-0.822049	1.25168	-3.08837	0.00598259	0.033397	-2.27949	81	89	39	55
ARID3A	-1.20281	3.00166	-7.41222	4.70451e-07	1.68655e-05	6.5481	339	316	116	163
ARID3B	-0.624522	3.36567	-4.7801	0.000125814	0.00170311	0.985677	336	353	207	227
ARL6IP4	-0.870896	-0.331939	-2.20255	0.0400028	0.127936	-3.71389	30	27	13	17
ASIC4	-3.92939	0.0575429	-9.08046	2.16981e-08	1.35457e-06	7.09558	98	121	7	6
ATP1B2	-1.98239	4.1562	-18.0197	1.63284e-13	9.64467e-11	20.8146	959	950	224	245
ATP8B2	-1.62642	3.56984	-12.5049	1.0828e-10	2.00464e-08	14.6285	552	571	179	174
ATXN1	-0.754488	1.07146	-2.75936	0.0123774	0.0560362	-2.90387	75	71	45	39
AXL	-2.73836	3.82333	-20.1885	2.03376e-14	2.52267e-11	22.1319	1020	950	142	144
AZU1	-1.12689	1.0744	-4.06943	0.000638882	0.00616831	-0.229984	88	79	33	41
B3GALNT1	-0.899213	0.297714	-2.46087	0.0234664	0.0882504	-3.3469	49	41	16	33
B3GNT9	-0.682859	1.03719	-2.38855	0.0273029	0.0979083	-3.59336	63	77	35	50
BAIAP2	-1.3735	3.87364	-11.1797	7.29353e-10	8.73819e-08	12.8617	688	586	234	242
BAIAP2-AS1	-1.18097	1.52145	-4.84328	0.000109038	0.00150949	1.38294	111	121	52	47
BCL3	-2.72139	0.0367223	-7.01284	1.03792e-06	3.23477e-05	4.77094	71	70	9	11
BCRP3	-1.26095	0.7268	-4.16389	0.000514247	0.00522417	-0.0347349	68	69	28	27
BEGAIN	-1.05155	1.5115	-4.33122	0.000350288	0.0038248	0.301101	109	111	55	48
BEX4	-0.684083	1.18084	-2.56662	0.0187558	0.0753366	-3.29135	82	72	50	43
BIN1	-3.66642	-1.3119	-7.11117	8.52487e-07	2.7827e-05	4.1142	31	47	3	2
BIN2	-0.710074	3.89866	-6.52863	2.78815e-06	7.16029e-05	4.66407	516	511	292	318
BOK	-1.3175	2.40367	-6.99354	1.07898e-06	3.34591e-05	5.73911	233	216	93	82
BTG2	-1.07808	3.42655	-7.54459	3.63649e-07	1.36275e-05	6.77348	383	462	181	206
BZRAP1-AS1	-0.672711	1.01464	-2.2593	0.0356448	0.118251	-3.81935	73	64	31	55
C11orf21	-0.904954	6.46687	-16.0856	1.27591e-12	5.45738e-10	19.0732	3153	3371	1668	1716
C11orf95	-1.27796	3.49062	-9.39387	1.2663e-08	8.67799e-07	10.0661	441	503	190	187
C14orf37	-1.80183	0.232246	-5.02024	7.3153e-05	0.00108715	1.57722	66	52	15	17
C16orf93	-0.603599	1.59105	-2.48986	0.0220751	0.084304	-3.52017	87	114	61	66
C17orf72	-1.44577	0.0396865	-3.4787	0.0024754	0.0175557	-1.418	52	39	25	10
C17orf99	-2.5859	1.21161	-8.08226	1.30889e-07	5.75727e-06	7.15311	133	174	31	19
C19orf66	-0.61129	2.3714	-3.15964	0.00509898	0.0298651	-2.35753	160	184	123	97
C1RL	-0.791967	3.07308	-5.34901	3.51125e-05	0.000598295	2.30905	320	277	165	169
C20orf112	-1.477	4.21688	-14.3481	9.80181e-12	2.8948e-09	17.0657	845	826	279	304
C2orf62	-1.60392	-0.669739	-3.6776	0.00157101	0.0122636	-1.09598	29	29	10	8
C5AR2	-1.08848	2.76444	-6.69734	1.969e-06	5.4154e-05	5.16661	260	273	120	123
C6orf223	-1.81801	-0.00721249	-4.38164	0.00031207	0.00349361	0.316114	51	49	8	22
C7orf34	-0.741854	1.05865	-2.60278	0.0173608	0.0711408	-3.20077	64	81	47	37
C8G	-1.75233	-0.44238	-4.21375	0.000458626	0.00477248	-0.0752366	39	33	10	10
C8orf58	-0.608418	0.964461	-2.09549	0.0495729	0.148276	-4.09146	56	74	44	38
CA11	-0.923221	0.770774	-3.0165	0.00702345	0.0374647	-2.35961	73	54	30	34
CABLES2	-0.793736	2.94092	-5.12946	5.72584e-05	0.000890017	1.85298	286	258	160	145
CABP7	-1.51272	-0.327877	-3.71513	0.00144153	0.0114989	-0.987258	40	32	10	14
CACNA2D4	-0.759533	1.52634	-3.2033	0.00462198	0.0278577	-2.08883	99	102	55	60
CAMK1D	-1.00068	2.34316	-5.33258	3.64145e-05	0.000615375	2.37884	203	183	96	91
CAMKK1	-1.38846	2.63475	-7.59018	3.32968e-07	1.25919e-05	6.87088	246	297	97	103
CAPG	-1.05625	1.41779	-3.99204	0.000763239	0.00703359	-0.412487	105	102	37	62
CAPN5	-1.66974	3.6589	-13.102	4.82645e-11	1.06906e-08	15.4086	627	586	188	182
CARHSP1	-0.627087	5.28304	-8.61412	4.94516e-08	2.67859e-06	8.4579	1275	1331	830	810
CARNS1	-1.1664	0.283575	-3.04796	0.00654787	0.0356151	-2.25506	38	62	27	16
CASKIN2	-0.756091	1.0328	-2.56475	0.018831	0.0755823	-3.26758	73	69	52	32
CASS4	-1.20616	0.847001	-4.04189	0.000680628	0.0064461	-0.283001	66	81	30	31
CCDC136	-0.715026	1.00254	-2.44164	0.024434	0.0905255	-3.49021	80	59	34	48
CCDC27	-1.51373	-0.0111538	-3.81605	0.00114355	0.00964936	-0.767494	57	35	13	17
CCDC85C	-0.644104	3.38502	-4.81437	0.000116413	0.00160088	1.05819	353	349	234	204
CCDC88B	-1.02407	1.52889	-4.25483	0.000417358	0.00443721	0.137198	117	104	53	52
CCNB3	-1.42783	-0.0560673	-3.78047	0.00124088	0.0102737	-0.83866	44	40	17	13
CCND3	-0.728028	7.90752	-18.0971	1.51005e-13	9.64467e-11	21.1109	8467	8183	4777	4993
CCR10	-0.909693	2.47213	-5.12093	5.83618e-05	0.000901036	1.90955	198	211	103	108
CCR7	-1.6646	0.391491	-4.89252	9.75502e-05	0.00137822	1.37263	61	64	16	22
CD70	-0.993155	0.414053	-2.77153	0.0120536	0.0550897	-2.79191	61	41	31	19
CDC42BPB	-1.03383	2.83855	-5.93542	9.75732e-06	0.00020307	3.60385	302	250	147	116
CDC42BPG	-1.29551	3.13068	-8.83196	3.35424e-08	1.96254e-06	9.10601	384	355	139	153
CDC42EP4	-0.899738	4.69032	-8.94831	2.73281e-08	1.64552e-06	9.18226	1006	894	542	452
CDH1	-0.6617	5.91012	-11.1591	7.52263e-10	8.88673e-08	12.625	2042	2032	1224	1279
CDHR1	-0.742524	1.72609	-3.22067	0.00444451	0.0271041	-2.08821	129	102	67	66
CDK15	-0.651005	0.743708	-2.14911	0.0445462	0.137793	-3.9587	64	49	34	35
CDKN1C	-2.67732	2.08698	-11.8274	2.81263e-10	4.25462e-08	12.7281	291	287	42	45
CELF2-AS1	-0.861309	0.353242	-2.39385	0.027003	0.0970575	-3.47272	57	37	19	31
CELSR2	-0.597218	6.14646	-10.2343	3.1633e-09	2.86405e-07	11.1094	2292	2402	1506	1509
CERCAM	-0.864342	3.07512	-5.68958	1.66102e-05	0.000317463	3.04643	311	300	180	148
CES3	-0.831456	1.26608	-3.07593	0.00615134	0.0341392	-2.30673	76	97	52	42
CHMP4C	-1.06488	-0.277248	-2.14928	0.0445312	0.137787	-3.80362	45	22	26	8
CKMT2	-0.940537	0.4595	-2.75917	0.0123827	0.0560362	-2.82027	54	48	19	34
CLCF1	-2.4433	-0.717024	-5.1867	5.03808e-05	0.000805314	1.51664	33	43	8	5
CLCN2	-0.640624	4.22782	-6.49693	2.97779e-06	7.49218e-05	4.5253	632	628	368	418
CLDN7	-1.25977	2.02785	-6.07008	7.31359e-06	0.000158598	3.91348	167	172	68	69
CLIP2	-1.75732	3.46255	-13.0025	5.51073e-11	1.17854e-08	15.2122	556	535	156	157
COL18A1	-0.606219	6.93796	-10.1321	3.72827e-09	3.21149e-07	10.8084	4275	3880	2730	2481
COL2A1	-2.4782	1.94905	-9.27075	1.56244e-08	1.04196e-06	9.36309	255	234	60	30
CORO2A	-1.00406	3.69828	-8.3793	7.56581e-08	3.68345e-06	8.30006	493	497	222	258
COX6B2	-1.69468	-0.0776195	-4.42	0.000285835	0.00327677	0.380738	47	44	11	16
CPAMD8	-0.807845	2.36354	-4.09795	0.000598363	0.00587191	-0.315345	172	194	117	88
CPLX1	-0.87	0.578684	-2.71195	0.0137208	0.0602881	-2.92332	56	52	23	35
CR2	-0.777054	1.52579	-3.08934	0.00596958	0.0333393	-2.32252	89	115	50	65
CRB2	-1.75213	1.33452	-5.94501	9.5584e-06	0.000199936	3.58029	154	100	35	36
CREB3L1	-2.5195	-0.66474	-4.52029	0.000227265	0.00271839	0.388307	56	29	3	13
CRIP2	-2.588	0.944287	-8.13504	1.18644e-07	5.33698e-06	7.06403	120	134	16	25
CSF2RB	-0.586031	6.12876	-10.192	3.38579e-09	3.0063e-07	11.0425	2373	2246	1487	1503
CSMD1	-0.836448	0.110637	-2.32436	0.0311888	0.107732	-3.56214	36	41	17	25
CSPG4P11	-1.49983	0.820624	-5.03777	7.03284e-05	0.00105612	1.73106	80	79	27	27
CSRNP1	-0.801069	2.63844	-4.55124	0.000211763	0.00256765	0.63415	200	244	124	122
CST7	-1.02271	2.78734	-5.97408	8.98021e-06	0.000189118	3.69027	263	267	106	150
CTAGE7P	-1.27874	0.485484	-3.77434	0.00125844	0.010365	-0.827951	65	52	28	19
CTC-251D13.1	-0.781285	0.264213	-2.30381	0.0325376	0.111	-3.61783	45	39	24	23
CTD-2031P19.4	-1.08585	1.44711	-3.3736	0.00314419	0.0208671	-1.71776	105	109	28	83
CTD-2611O12.6	-0.808564	-0.0696876	-2.18484	0.0414595	0.131223	-3.77335	34	33	16	21
CU459201.1	-0.812723	0.528553	-2.58175	0.0181599	0.0735647	-3.15925	52	50	28	28
CXXC5	-0.726646	6.00353	-11.6214	3.79169e-10	5.40599e-08	13.313	2256	2188	1349	1264
CYP17A1	-0.90172	0.716308	-2.99672	0.00733949	0.0386578	-2.39275	62	58	32	30
CYP2S1	-4.07019	-0.929293	-7.39144	4.89964e-07	1.74641e-05	4.58144	56	59	1	7
CYP2W1	-3.30665	0.896676	-9.98803	4.71012e-09	3.94759e-07	9.24391	167	148	15	15
CYP4F12	-3.46308	0.135425	-8.4644	6.48001e-08	3.25417e-06	6.63071	102	94	6	11
DAB2IP	-2.43835	-0.635122	-5.3401	3.58128e-05	0.000606861	1.80577	38	42	5	9
DARC	-1.18679	1.87166	-5.40413	3.10795e-05	0.000539176	2.5519	140	157	62	64
DBN1	-1.37176	4.33613	-13.4996	2.86446e-11	6.96682e-09	16.0494	910	840	337	320
DBNDD2	-1.06937	-0.0578528	-2.78955	0.0115885	0.0538165	-2.71949	44	31	19	15
DDR1	-3.40164	-0.383795	-7.38108	5.0001e-07	1.77204e-05	4.82337	65	68	8	4
DEGS2	-1.52647	2.97999	-8.59931	5.07849e-08	2.71524e-06	8.69181	354	365	149	99
DEXI	-1.04972	0.321907	-2.86745	0.00976901	0.0475568	-2.60233	44	52	31	16
DGKA	-0.617644	1.77299	-2.56029	0.0190105	0.0759931	-3.42752	102	126	86	60
DIRAS1	-1.1286	1.97948	-5.09026	6.25134e-05	0.0009526	1.89046	150	164	57	84
DLC1	-1.07129	1.2106	-3.94819	0.000844167	0.00762728	-0.490043	90	90	34	50
DLG4	-1.41292	2.52914	-7.73586	2.51707e-07	1.0108e-05	7.12535	252	254	100	85
DLG5	-0.859331	2.96144	-5.64169	1.84395e-05	0.000347604	2.96159	270	295	144	158
DMTN	-0.866393	7.18873	-17.4514	2.92501e-13	1.45128e-10	20.5043	5388	5222	2902	2758
DNAAF3	-0.757904	0.497379	-2.3	0.0327936	0.111628	-3.65826	42	57	30	26
DNAH17	-0.676539	0.994512	-2.38949	0.0272495	0.0977733	-3.58404	73	62	45	37
DNAJB2	-1.11995	2.54726	-6.2172	5.35152e-06	0.000123645	4.21066	225	239	91	117
DNMT3A	-0.962279	3.5543	-7.4544	4.33286e-07	1.57148e-05	6.58435	472	412	224	216
DOCK11	-1.06606	1.21524	-3.69408	0.0015128	0.0119066	-1.02277	73	111	42	41
DOK3	-0.783551	5.4236	-11.1767	7.32644e-10	8.73819e-08	12.7331	1536	1496	875	838
DPEP2	-0.90709	0.967664	-3.1817	0.00485228	0.0288117	-2.05301	79	65	34	40
DPF3	-0.716447	0.946358	-2.53021	0.0202669	0.0795792	-3.3177	65	67	42	36
DUSP3	-0.676893	4.43581	-7.16253	7.69611e-07	2.5389e-05	5.84691	709	766	426	470
DYRK1B	-0.607531	3.38733	-4.72736	0.00014181	0.00187728	0.861913	344	351	215	228
DYSF	-1.30904	4.10398	-12.2914	1.45629e-10	2.57902e-08	14.4476	732	726	267	305
E2F2	-0.842603	5.18768	-11.5219	4.38604e-10	5.91352e-08	13.2898	1318	1311	683	742
EEF2K	-0.604143	6.70789	-11.8089	2.8884e-10	4.29172e-08	13.4811	3402	3543	2159	2281
EFCAB12	-0.762735	0.551292	-2.36259	0.028817	0.101953	-3.55708	44	59	27	31
EGFL8	-0.652396	0.988217	-2.34389	0.0299553	0.104843	-3.66507	69	64	43	39
EHBP1L1	-0.983557	6.71709	-19.6511	3.34123e-14	3.18805e-11	22.7484	4009	3960	1942	1975
EHD1	-0.610137	6.03146	-10.3129	2.78988e-09	2.54454e-07	11.2589	2170	2182	1401	1371
EHD2	-3.35811	0.119362	-8.33745	8.16751e-08	3.87299e-06	6.49143	100	87	7	10
EIF4HP2	-0.773264	1.18367	-2.9509	0.00812517	0.0415413	-2.54564	80	79	44	46
EIF5AP2	-4.10377	-1.33722	-8.16722	1.11765e-07	5.16674e-06	5.39028	53	36	2	2
ELF4	-0.870217	4.3837	-9.17577	1.83971e-08	1.20104e-06	9.62931	768	751	413	395
EMILIN1	-0.674434	2.91603	-4.31134	0.000366615	0.00397508	0.0408663	273	241	142	171
EMILIN2	-0.771937	2.628	-4.5605	0.000207336	0.0025288	0.655871	230	205	117	130
EMP2	-0.751296	2.85885	-4.73893	0.00013813	0.00183838	1.00628	271	236	149	143
ENO2	-1.49729	1.89667	-6.60842	2.3641e-06	6.29276e-05	4.94942	159	178	50	66
EPB41L4B	-0.875556	1.28087	-3.22683	0.00438321	0.0268347	-2.00125	88	88	57	38
EPB42	-0.599051	5.95183	-9.93669	5.12202e-09	4.17984e-07	10.6494	2108	1996	1318	1315
EPHB6	-0.737847	4.61356	-8.13906	1.17761e-07	5.33104e-06	7.71247	878	824	516	477
EPN3	-3.05387	-0.823148	-6.13841	6.32373e-06	0.000141258	2.86263	42	45	3	7
EPOR	-0.616089	7.05355	-11.861	2.68008e-10	4.10417e-08	13.5074	4408	4449	2902	2720
EPPK1	-0.952558	1.2953	-3.63423	0.00173509	0.0132525	-1.15693	87	96	51	41
EPS8L2	-1.09868	0.971423	-3.36169	0.00323041	0.0213366	-1.68679	69	85	50	24
ESPN	-1.05899	6.45368	-19.9819	2.45788e-14	2.7716e-11	23.0703	3406	3409	1566	1613
ESRP2	-0.958588	1.38955	-3.6355	0.00173004	0.013222	-1.16445	91	105	58	41
EVPL	-0.704083	6.15706	-12.2755	1.48905e-10	2.57902e-08	14.2461	2517	2390	1460	1467
EXOC3L2	-2.23016	-0.150937	-5.5976	2.03057e-05	0.000379898	2.46658	52	52	12	9
F11R	-0.590469	4.44412	-6.54027	2.72174e-06	7.00426e-05	4.5654	722	716	458	470
F8A2	-0.996715	-0.209203	-2.53244	0.0201712	0.0793039	-3.16895	34	31	12	20
FADS3	-0.646189	4.50867	-7.16538	7.65253e-07	2.53125e-05	5.83605	795	739	472	480
FAM122C	-0.588027	3.3563	-4.34118	0.000342378	0.00375496	0.000948913	321	355	228	209
FAM132B	-0.781241	5.66791	-10.3858	2.4846e-09	2.3526e-07	11.4463	1797	1790	1095	942
FAM211A	-0.745663	1.3278	-2.92038	0.00869279	0.0437425	-2.63014	89	85	55	46
FAM212A	-1.69918	0.724567	-5.09548	6.17865e-05	0.000946762	1.82474	95	67	19	29
FAM212B	-1.40931	0.679236	-3.45929	0.00258739	0.0181015	-1.46547	67	72	49	13
FAM213B	-0.693331	4.80219	-8.43196	6.87349e-08	3.41035e-06	8.22066	935	976	562	586
FAM214B	-1.28282	3.0122	-8.36112	7.82131e-08	3.73137e-06	8.28383	357	321	130	140
FAM222A	-0.941105	1.12984	-3.36203	0.00322792	0.0213314	-1.70404	71	93	37	45
FAM24B	-0.917285	0.502257	-2.87336	0.00964277	0.0471081	-2.60889	55	49	27	26
FAM46B	-1.52246	-0.22335	-3.14645	0.00525231	0.0305867	-2.05274	29	51	23	7
FAM50B	-0.751535	0.497755	-2.35372	0.0293516	0.103372	-3.56481	53	45	28	28
FAM65A	-0.593408	7.0978	-11.3121	5.98241e-10	7.66916e-08	12.6719	4519	4542	3030	2814
FAM83A	-0.968422	7.39999	-21.3159	7.45534e-15	1.15595e-11	24.2262	6526	6204	3153	3169
FARP1	-0.904975	0.428653	-2.5433	0.0197109	0.0779139	-3.21553	60	40	32	20
FAT2	-0.830483	0.585826	-2.65873	0.0153939	0.0653475	-3.02419	57	50	30	28
FAXDC2	-1.33704	2.31939	-6.14196	6.2762e-06	0.000140523	4.06395	254	179	75	89
FBLN2	-2.1363	1.20344	-7.54806	3.61214e-07	1.35773e-05	6.36665	134	125	32	25
FBXO16	-0.708563	0.50712	-2.19981	0.0402247	0.128396	-3.83179	49	48	24	34
FCF1P2	-0.693457	2.01054	-3.40235	0.00294534	0.0198446	-1.76084	140	135	84	81
FCGR2A	-1.05327	0.139112	-2.73556	0.0130356	0.0581422	-2.83259	39	46	13	29
FEZ1	-0.688777	2.03571	-3.33306	0.00344714	0.0223397	-1.91322	134	146	75	94
FGD4	-0.986568	0.942766	-3.44403	0.00267887	0.0186051	-1.51731	70	75	31	40
FGFR1	-0.948965	3.39117	-6.54948	2.67032e-06	6.93807e-05	4.80373	431	356	213	183
FGFR3	-2.24009	3.1234	-14.0503	1.41947e-11	3.66663e-09	16.1674	527	493	102	107
FHDC1	-0.781295	4.14285	-7.75894	2.40858e-07	9.79541e-06	7.07857	623	624	338	367
FKBP9	-0.981622	1.40902	-3.96523	0.000811751	0.0073982	-0.469407	99	101	50	48
FLT4	-0.643336	5.13561	-8.66188	4.53935e-08	2.51367e-06	8.57549	1209	1158	704	769
FNBP1P1	-0.864351	1.44013	-3.28385	0.00385352	0.0242635	-1.9071	102	94	65	42
FNDC4	-1.18452	-0.233459	-3.01169	0.00709909	0.0377119	-2.30329	34	34	17	12
FOS	-0.831571	1.95238	-3.92728	0.000885707	0.00790382	-0.617976	150	128	73	78
FOSL2	-1.62931	2.10088	-7.66618	2.87645e-07	1.11498e-05	6.91931	216	190	67	60
FOXH1	-2.5164	0.612617	-6.75613	1.74578e-06	4.95529e-05	4.73431	93	104	10	26
FSCN1	-0.758379	8.17848	-18.3282	1.19799e-13	8.25547e-11	21.3234	10230	10067	5923	5743
FSD1L	-0.89797	3.61081	-5.9641	9.17448e-06	0.000192555	3.53794	411	492	191	285
GALNT6	-0.589383	4.73355	-7.0185	1.0262e-06	3.21438e-05	5.48699	897	861	537	599
GAREML	-0.978744	3.12196	-6.60269	2.39219e-06	6.34034e-05	4.94758	337	320	175	150
GAS2L1	-1.37096	6.01921	-22.7912	2.15415e-15	4.45334e-12	25.4736	2859	2760	1044	1067
GAS2L2	-1.27832	0.729181	-4.18097	0.000494469	0.00504391	7.43085e-05	68	70	30	25
GCSAM	-0.97261	0.417119	-2.78713	0.0116501	0.0540419	-2.76315	59	42	30	20
GGT1	-0.758786	4.29699	-7.7836	2.29798e-07	9.4073e-06	7.09746	695	681	407	384
GJC2	-1.99869	1.19536	-7.19425	7.22623e-07	2.43571e-05	5.78815	130	116	29	30
GLIPR2	-1.72464	-0.480229	-3.76365	0.0012897	0.0105663	-0.915983	34	35	16	6
GNB3	-0.784606	0.369465	-2.17025	0.0426954	0.133939	-3.85877	60	34	22	29
GPR153	-1.38672	1.24816	-5.26827	4.20064e-05	0.000691044	2.24348	103	103	36	40
GPR161	-0.92074	0.4427	-2.79423	0.0114708	0.0535104	-2.75289	46	54	28	23
GPR56	-1.40387	5.43759	-19.2862	4.71445e-14	3.65487e-11	22.4047	1877	1919	715	680
GPR89B	-0.70165	1.55614	-2.52865	0.0203341	0.079742	-3.43751	78	130	51	70
GPSM1	-1.34654	0.935931	-4.58924	0.00019418	0.0024062	0.84176	90	74	33	29
GPT	-0.848061	5.17058	-9.58266	9.20707e-09	6.6398e-07	10.1997	1324	1276	776	637
GSN	-0.700017	2.6613	-4.16156	0.000517006	0.00524361	-0.236654	225	209	117	143
GSTM2	-1.12508	0.162787	-3.06609	0.00628814	0.0346015	-2.21421	42	46	25	15
GSTM3P1	-0.924176	0.858466	-3.16352	0.0050547	0.0297713	-2.07747	62	72	32	36
GTF2IRD1	-0.780969	1.30923	-3.08709	0.00599971	0.0334624	-2.29144	86	88	49	49
HDAC11	-0.78913	1.57178	-3.10644	0.00574549	0.0324975	-2.29539	95	116	47	73
HDAC5	-0.721106	4.64739	-8.07973	1.31509e-07	5.76408e-06	7.59348	901	832	525	497
HEPH	-0.673595	0.905039	-2.30493	0.0324625	0.110835	-3.71873	57	70	42	35
HES2	-1.69933	2.53021	-8.55097	5.54039e-08	2.88752e-06	8.53128	285	276	66	105
HES5	-0.661274	1.83742	-3.06338	0.00632629	0.034768	-2.43732	121	120	77	71
HIST1H2AC	-0.734815	0.953789	-2.53038	0.0202596	0.0795757	-3.31834	77	58	35	43
HLF	-0.816064	2.21271	-4.11344	0.000577442	0.00571635	-0.25442	183	149	90	92
HMBS	-0.591463	7.81562	-14.1955	1.184e-11	3.26363e-09	16.6258	7652	7251	4715	4896
HMGB1P10	-0.811514	2.53927	-2.63705	0.0161298	0.067367	-3.46702	173	245	200	66
HMOX1	-0.947211	1.29815	-3.60958	0.0018358	0.0138595	-1.20885	83	101	42	50
HRASLS5	-1.21549	-0.497936	-2.76223	0.0123004	0.0558266	-2.7485	28	29	17	8
HSD11B2	-0.84247	2.11837	-4.20025	0.000473062	0.00488582	-0.0490091	167	146	80	89
HSD3B7	-0.623519	4.16148	-6.01392	8.24565e-06	0.000175135	3.51459	569	628	379	375
HSF4	-0.883264	1.11702	-3.22386	0.00441265	0.0269761	-1.98565	85	73	45	38
HSPA12B	-1.72448	0.971341	-5.79256	1.32804e-05	0.000262708	3.21562	105	87	24	32
HSPG2	-1.50205	3.75202	-11.3112	5.99081e-10	7.66916e-08	13.0389	647	577	181	241
ICAM2	-0.768401	3.1294	-5.30026	3.91235e-05	0.000657571	2.19155	315	299	186	165
ICOSLG	-1.62827	0.191695	-4.4461	0.000269261	0.00312434	0.47667	54	53	21	13
IDNK	-0.74332	0.364692	-2.20651	0.0396838	0.127319	-3.79784	47	42	21	31
IDS	-0.750007	2.73041	-4.63059	0.000176717	0.0022401	0.791192	5	7	1	2
IDS	-0.750007	2.73041	-4.63059	0.000176717	0.0022401	0.791192	224	239	130	137
IFIT2	-0.940607	2.08907	-4.57741	0.000199488	0.00245969	0.778049	155	162	70	91
IGSF3	-1.18558	2.04033	-5.2699	4.18547e-05	0.000689464	2.26766	171	163	55	91
IL1RN	-4.45286	-0.593865	-8.80127	3.5415e-08	2.0432e-06	6.26533	97	71	5	2
IL27RA	-0.629635	4.43531	-6.93674	1.20979e-06	3.65157e-05	5.38828	722	727	443	467
IL2RB	-1.85483	3.43828	-12.8664	6.61459e-11	1.32335e-08	15.0249	572	537	163	136
IL2RG	-0.85257	0.479792	-2.60087	0.0174321	0.0713387	-3.11755	53	47	31	23
IMPA2	-0.909869	0.82828	-3.05905	0.00638784	0.0350506	-2.28221	73	58	31	36
INF2	-0.821512	6.40818	-13.0247	5.34952e-11	1.16413e-08	15.2611	3132	2949	1766	1585
IQSEC2	-1.6064	0.963599	-5.44551	2.83648e-05	0.000505514	2.55142	85	98	25	33
IQSEC3	-1.31279	2.50801	-7.35703	5.24137e-07	1.84699e-05	6.43117	241	241	93	95
IRF1	-0.754636	2.58838	-4.34745	0.000337495	0.00371454	0.191549	201	219	128	114
IRF6	-0.682005	3.20038	-4.66569	0.000163149	0.00209276	0.769491	296	332	169	212
IRF9	-0.798377	-0.00199476	-2.17274	0.0424825	0.13344	-3.80189	33	37	22	17
ISG20	-1.25846	0.67092	-4.03496	0.000691541	0.0065231	-0.298525	61	71	28	25
ITGB4	-0.996698	1.35316	-3.90691	0.000928146	0.00818806	-0.587929	104	90	43	51
ITGB7	-1.20715	2.72264	-7.18317	7.38679e-07	2.4759e-05	6.11397	267	272	120	107
JAKMIP1	-0.735075	4.05472	-6.97981	1.10919e-06	3.414e-05	5.55858	593	561	345	329
JUP	-1.13359	6.94188	-21.0343	9.53481e-15	1.31411e-11	24.0034	4936	4871	2259	2091
KANK2	-0.951192	5.8282	-14.0811	1.36567e-11	3.6042e-09	16.7324	2228	2030	1095	1045
KB-1732A1.1	-1.0234	-0.310717	-2.58345	0.0180939	0.0733694	-3.07246	31	30	12	17
KCNQ1OT1	-0.857555	3.02747	-5.75533	1.43973e-05	0.000280352	3.19438	306	285	146	171
KCTD17	-1.0955	0.593126	-3.1936	0.004724	0.0282938	-1.99254	71	49	20	35
KDELR3	-0.666262	2.04718	-3.22359	0.00441537	0.0269788	-2.1474	135	145	75	97
KIAA0125	-1.75886	-0.664381	-3.97725	0.000789622	0.00724443	-0.550788	35	27	9	8
KIAA1161	-1.79155	-0.639253	-3.92609	0.00088813	0.00791975	-0.641047	28	36	6	12
KIAA1217	-0.75145	0.485656	-2.26994	0.0348784	0.116675	-3.70833	42	56	24	32
KIAA1522	-0.633535	7.47713	-11.2382	6.68082e-10	8.1244e-08	12.503	6137	5817	3976	3530
KIF21B	-1.23606	2.96812	-8.10268	1.26003e-07	5.58193e-06	7.82291	321	325	132	134
KIF26A	-1.82398	7.10115	-36.3833	3.23461e-19	2.00611e-15	34.0817	7074	6842	1939	1882
KIF5A	-1.76012	2.57843	-9.57482	9.32898e-09	6.65038e-07	10.1815	313	279	85	84
KIFC2	-1.09683	4.68652	-12.3977	1.25584e-10	2.29079e-08	14.5996	982	1047	455	466
KIFC3	-1.00066	3.04215	-6.77126	1.69265e-06	4.84888e-05	5.2949	325	302	152	152
KISS1R	-2.83276	-0.589225	-5.77523	1.37888e-05	0.0002702	2.48699	57	39	9	4
KLF8	-1.23547	2.30346	-6.35703	3.98716e-06	9.58464e-05	4.49539	197	210	90	78
KLHDC8A	-1.89637	0.894015	-6.17752	5.82027e-06	0.000133447	3.90071	89	104	21	29
KLHDC8B	-0.730142	5.79261	-11.8046	2.90636e-10	4.29172e-08	13.6181	1927	1919	1081	1173
KLHL32	-0.787379	1.81984	-3.62216	0.00178368	0.0135237	-1.25509	125	124	65	75
KLK1	-2.56642	0.247597	-6.9108	1.27487e-06	3.81049e-05	4.77509	81	74	10	15
KLRG2	-0.814729	3.61546	-6.75076	1.76505e-06	4.99855e-05	5.17627	451	424	240	243
KNDC1	-2.07088	-0.678458	-4.66828	0.000162192	0.00208696	0.671815	33	35	8	7
KRBA1	-0.89132	0.798963	-3.01634	0.00702604	0.0374647	-2.36341	68	59	31	35
KRT13	-2.64415	-0.391486	-5.86573	1.13371e-05	0.000231673	2.75696	63	41	7	8
KRT222	-0.912812	0.326964	-2.70784	0.0138438	0.060678	-2.90245	50	42	25	22
KRT222	-0.912812	0.326964	-2.70784	0.0138438	0.060678	-2.90245	3	3	2	1
LAMA5	-1.86562	4.52912	-17.9111	1.82282e-13	1.02774e-10	20.8942	1134	1241	328	305
LASP1	-0.75619	6.91569	-15.8107	1.73888e-12	7.1897e-10	18.7076	4284	4169	2401	2463
LBH	-0.746879	3.29864	-5.48406	2.60544e-05	0.000471107	2.55963	364	323	191	206
LCP2	-1.25035	-0.102054	-3.26167	0.00405168	0.0252421	-1.83547	43	34	13	18
LGALS1	-0.709374	3.70307	-5.83299	1.21679e-05	0.000245017	3.23131	473	425	244	290
LGALS12	-2.09439	-0.89174	-4.41675	0.000287969	0.00328911	0.167591	28	31	8	5
LIME1	-0.669468	0.742636	-2.13189	0.0461078	0.141111	-3.98728	62	51	42	28
LINC00094	-0.620487	3.46689	-4.54309	0.000215736	0.0026031	0.428723	335	406	236	230
LINC00341	-0.855725	2.01944	-4.18182	0.000493511	0.00504022	-0.0745382	144	149	74	83
LLGL2	-0.728781	3.33323	-4.90877	9.40375e-05	0.00133613	1.28324	356	341	237	177
LONRF2	-1.10867	2.59066	-6.34194	4.11527e-06	9.79765e-05	4.46176	251	225	110	104
LPAR5	-1.34507	3.73854	-10.5442	1.93515e-09	1.95151e-07	11.9044	565	579	241	199
LPCAT2	-0.759216	3.13517	-5.03352	7.10025e-05	0.00106495	1.60374	320	296	152	204
LPHN1	-0.820924	4.11061	-7.52538	3.77441e-07	1.39755e-05	6.63372	610	625	366	316
LPIN1	-0.932741	5.19149	-12.2343	1.57756e-10	2.68055e-08	14.3257	1312	1409	680	704
LPPR3	-0.71308	3.7866	-6.15613	6.09025e-06	0.000137352	3.905	493	458	291	273
LRG1	-0.635127	4.21984	-6.31103	4.3912e-06	0.000103947	4.1355	600	651	392	390
LRP1	-1.66561	0.00667285	-4.34033	0.000343047	0.00375897	0.243882	54	42	17	12
LRRC48	-0.681043	1.62344	-2.9145	0.00880641	0.0442067	-2.69713	104	105	69	58
LRRN2	-1.11103	1.04518	-3.33747	0.00341287	0.0222105	-1.74326	72	91	55	24
LRTM2	-0.591669	5.16456	-7.66658	2.87427e-07	1.11498e-05	6.68566	1201	1169	797	734
LTBP2	-2.02472	1.41717	-7.44844	4.38346e-07	1.5852e-05	6.30471	158	132	39	30
LTBP3	-0.65311	2.1163	-2.90553	0.00898256	0.0448423	-2.8232	136	156	113	72
LTBP4	-0.665375	5.88416	-11.1035	8.18039e-10	9.30913e-08	12.5435	2013	1993	1218	1237
MACC1	-0.607516	3.85687	-5.51184	2.45095e-05	0.000448401	2.49395	494	469	295	319
MAFG-AS1	-0.678439	3.38769	-4.99488	7.74474e-05	0.00113822	1.46127	368	344	234	200
MAP1A	-2.61227	1.99803	-9.47372	1.10604e-08	7.75103e-07	9.66078	227	310	50	35
MAP3K6	-1.90919	1.85885	-8.33658	8.18062e-08	3.87299e-06	7.9551	182	196	48	49
MAPK11	-1.18458	1.68508	-4.42196	0.000284555	0.00326515	0.484346	129	132	38	80
MAPK15	-1.95036	1.14715	-6.75729	1.74164e-06	4.9549e-05	5.01864	105	130	28	30
MAPK8IP1	-1.13496	0.0913629	-2.81601	0.0109369	0.0517324	-2.68007	32	55	24	14
MATN1-AS1	-0.657904	1.77534	-2.98184	0.00758616	0.039587	-2.59169	121	110	66	76
MEX3B	-0.748485	3.27452	-5.27877	4.10373e-05	0.000680516	2.11542	338	336	214	178
MFI2	-0.736354	3.78112	-6.37169	3.86654e-06	9.33085e-05	4.36116	460	496	267	290
MFI2-AS1	-0.694922	0.614233	-2.25907	0.0356619	0.118258	-3.74825	50	54	31	31
MICAL1	-0.667117	4.21672	-6.75808	1.73882e-06	4.9549e-05	5.07061	641	620	392	380
MICAL2	-0.599657	6.84833	-12.0868	1.94206e-10	3.16964e-08	13.8691	3753	3890	2377	2525
MICALCL	-0.86908	0.115913	-2.47228	0.022909	0.0866881	-3.30602	41	37	20	21
MIDN	-0.955105	5.84643	-15.5137	2.44242e-12	9.77282e-10	18.4734	2154	2162	1040	1124
MIR22HG	-1.14484	2.30413	-5.74657	1.46736e-05	0.000284036	3.25351	221	176	87	86
MIR3150A	-0.627135	1.34184	-2.3715	0.0282883	0.100599	-3.6852	72	99	49	57
MKLN1-AS	-0.724818	1.04012	-2.47963	0.0225569	0.0856953	-3.42722	86	58	44	39
MLXIPL	-1.9648	1.83212	-8.31522	8.50717e-08	4.01228e-06	7.90487	198	180	52	42
MMP15	-0.715035	1.27722	-2.6635	0.0152363	0.0649232	-3.12447	75	92	56	43
MOB3C	-0.619258	3.5327	-5.03961	7.00379e-05	0.00105303	1.52558	378	394	239	249
MORN1	-1.12996	1.69534	-4.8925	9.75556e-05	0.00137822	1.48334	132	125	61	53
MRC2	-2.63844	-0.720844	-5.20315	4.85654e-05	0.000783362	1.52251	43	38	3	11
MRGPRE	-2.37481	1.04996	-6.9517	1.17381e-06	3.5862e-05	5.28015	107	149	32	17
MROH6	-1.00986	3.54065	-7.87024	1.94941e-07	8.33812e-06	7.3776	426	464	201	228
MT1G	-1.00499	0.881546	-2.44833	0.0240932	0.0898255	-3.45251	118	41	39	29
MTCP1	-0.752631	0.280245	-2.23883	0.0371642	0.121825	-3.73091	44	40	24	24
MXRA7	-1.19409	0.874351	-3.7428	0.0013529	0.0109467	-0.898746	60	92	27	36
MYEF2	-1.00435	1.24079	-3.77484	0.00125702	0.0103633	-0.856508	97	83	38	49
MYL4	-0.585998	4.92303	-7.42787	4.56294e-07	1.64531e-05	6.26807	1007	994	655	641
MYLK3	-2.34794	0.0868355	-6.16414	5.98775e-06	0.000135533	3.51814	66	62	14	10
MYO18A	-0.676968	6.01476	-11.5711	4.08067e-10	5.68726e-08	13.2348	2206	2197	1339	1338
MYO1C	-1.00298	5.7638	-14.4478	8.67147e-12	2.62344e-09	17.2005	2014	2129	1044	967
MYRF	-2.91452	0.344722	-7.34588	5.35736e-07	1.8772e-05	5.43887	110	79	15	9
N4BP3	-1.39626	0.467784	-4.24772	0.000424225	0.00448243	0.120146	61	59	19	25
NAP1L5	-0.61271	3.25271	-4.32537	0.000355017	0.00386962	-0.00811861	341	295	184	220
NARF	-0.613244	6.94112	-12.9806	5.67437e-11	1.19296e-08	15.1233	4116	4071	2563	2639
NAT8L	-1.04197	2.99755	-6.54859	2.67524e-06	6.93807e-05	4.85167	326	292	126	167
NBPF2P	-0.711574	0.313716	-2.12145	0.0470784	0.143092	-3.93177	46	39	23	27
NCR3LG1	-0.623321	6.58614	-9.94293	5.07002e-09	4.1648e-07	10.5492	3102	3329	1849	2218
NDRG1	-1.57911	2.76075	-8.99752	2.50723e-08	1.532e-06	9.32604	296	336	93	112
NHLRC4	-1.30349	2.55824	-7.32747	5.55471e-07	1.92999e-05	6.37975	255	243	89	107
NID2	-1.04873	0.683967	-3.2999	0.0037161	0.0236503	-1.78824	72	53	25	33
NINJ1	-1.63168	1.02973	-5.43456	2.9059e-05	0.000514191	2.54038	87	107	24	37
NLGN2	-1.07887	0.255616	-3.00263	0.0072436	0.0383317	-2.34065	41	52	26	17
NLRC5	-1.09164	2.80883	-6.68445	2.02177e-06	5.51166e-05	5.13887	285	265	133	118
NOV	-2.55862	-0.157873	-6.02159	8.11149e-06	0.000173175	3.13896	51	66	12	7
NPAS1	-0.682588	0.579084	-2.17888	0.0419607	0.132415	-3.87939	53	48	33	28
NPIPA5	-0.72328	1.48657	-2.75355	0.0125353	0.0564588	-2.98941	116	80	63	51
NPIPA8	-0.882796	0.342515	-2.39149	0.0271357	0.0974855	-3.47515	34	62	22	26
NPTX1	-0.884405	2.98436	-5.84573	1.18373e-05	0.000239919	3.39339	276	303	149	155
NQO1	-0.779856	1.98925	-3.65569	0.00165187	0.0127742	-1.21225	143	136	89	70
NRBP2	-0.692633	2.79014	-4.07715	0.000627643	0.00609177	-0.452703	223	250	159	127
NUDT18	-0.680429	2.54541	-3.57291	0.00199638	0.0148638	-1.50899	215	184	98	147
NUMBL	-0.853009	5.40572	-11.5963	3.93316e-10	5.54397e-08	13.3702	1522	1545	862	791
NYNRIN	-2.38728	-0.835163	-5.09299	6.21314e-05	0.000949111	1.31667	34	34	7	5
OBSCN	-0.805157	3.92944	-7.31184	5.72808e-07	1.97914e-05	6.24686	526	559	287	316
OGFOD2	-0.71899	0.909764	-2.33889	0.0302666	0.105605	-3.65869	52	80	34	42
ORAI2	-1.04678	4.28056	-10.5506	1.91586e-09	1.9479e-07	11.9077	772	733	333	375
ORAI3	-0.935694	2.28055	-4.96426	8.2976e-05	0.00120519	1.59403	184	177	92	91
OSBP2	-0.880546	6.76894	-17.8148	2.01081e-13	1.08444e-10	20.9249	4021	3950	2087	2121
OSBPL5	-1.15368	4.08601	-10.5869	1.80995e-09	1.85543e-07	11.9743	719	647	281	315
OSGIN1	-1.46262	0.262883	-4.14563	0.00053628	0.00540375	-0.100028	60	47	20	17
OTOP2	-3.75869	-1.45448	-6.69959	1.95994e-06	5.4154e-05	3.56385	47	27	1	4
P2RX1	-1.83524	2.70906	-9.59609	9.00212e-09	6.60804e-07	10.2493	302	365	98	83
PABPN1L	-0.823048	0.4808	-2.57333	0.0184894	0.0746315	-3.1684	51	48	28	26
PALM	-1.76011	2.43831	-9.11017	2.06077e-08	1.31086e-06	9.41289	274	262	84	70
PAQR7	-1.41729	1.14137	-4.79444	0.000121789	0.00166522	1.27207	112	83	42	29
PARP10	-0.618437	3.06203	-3.96137	0.000818975	0.00745857	-0.777109	270	286	199	156
PARP12	-0.983884	1.75394	-4.3633	0.00032546	0.00361415	0.350668	134	121	57	68
PAX6	-0.623703	1.05431	-2.28071	0.0341177	0.114968	-3.79012	68	70	39	48
PCED1B	-0.834595	2.03525	-4.04902	0.000669565	0.00636908	-0.366257	141	153	84	76
PCOLCE	-0.964065	1.39078	-3.70887	0.00146236	0.0116202	-1.00992	105	92	40	59
PCYOX1L	-0.700896	3.46026	-5.31183	3.81309e-05	0.00064263	2.14749	352	405	222	229
PDK2	-0.798376	2.3278	-3.97463	0.000794403	0.00728291	-0.57966	190	167	81	121
PDLIM1	-0.736722	4.89589	-8.77754	3.69372e-08	2.12115e-06	8.83456	1076	994	624	584
PEAR1	-4.34396	-1.95317	-6.6531	2.15626e-06	5.82708e-05	3.45895	28	34	4	0
PFKFB4	-1.36098	2.89948	-8.594	5.12727e-08	2.72955e-06	8.67824	325	318	125	118
PGBD4	-0.747838	1.63448	-3.02584	0.00687888	0.0369404	-2.47254	93	125	68	57
PHLDA2	-0.682456	2.78023	-4.31556	0.000363087	0.00394372	0.0799345	241	227	140	143
PHLDB1	-0.73227	5.75539	-10.4486	2.24942e-09	2.17983e-07	11.5314	1924	1825	1157	1041
PHOSPHO1	-1.45982	3.30426	-10.3939	2.45291e-09	2.34046e-07	11.6276	458	424	157	154
PHYHIP	-2.23092	-0.209806	-5.37951	3.28183e-05	0.000566961	2.06646	43	58	11	9
PIGQ	-0.754408	6.87622	-15.1659	3.66225e-12	1.33607e-09	17.9491	4105	4113	2390	2346
PIGZ	-0.644493	2.1167	-2.93738	0.0083721	0.0424734	-2.75813	152	140	70	116
PITPNM1	-0.607687	3.39301	-4.01067	0.000731245	0.00680958	-0.752114	380	319	257	193
PLEC	-0.919678	8.14233	-19.3907	4.2692e-14	3.65487e-11	22.388	10413	10517	5609	5159
PLEKHA4	-1.98512	2.28046	-9.8286	6.1169e-09	4.83274e-07	10.4158	258	262	60	67
PLIN4	-1.44654	-0.342798	-3.34832	0.00332985	0.0218537	-1.67779	36	33	18	8
PLIN5	-1.36808	0.357154	-3.94617	0.000848083	0.00764557	-0.488123	48	63	18	23
PLTP	-0.615957	2.1676	-2.71999	0.0134837	0.0595837	-3.21063	154	144	123	73
PLVAP	-2.20293	-0.109884	-5.42018	2.99964e-05	0.000525419	2.17748	61	46	13	9
PLXNA3	-1.17029	4.18078	-10.5066	2.05292e-09	2.05358e-07	11.8461	681	788	310	322
PLXNB2	-1.22526	5.57429	-17.7318	2.18932e-13	1.13151e-10	20.9019	1909	2017	794	837
PLXNB3	-1.25507	3.71006	-8.27585	9.14529e-08	4.28069e-06	8.11547	485	609	253	194
PODNL1	-0.792529	1.49304	-3.26691	0.00400394	0.0250327	-1.95135	93	106	56	55
POU2F2	-0.917354	2.10161	-4.37568	0.000316359	0.00353206	0.337422	178	141	75	88
PPP1R18	-1.46633	-0.507462	-3.39241	0.00301269	0.0201669	-1.60439	33	29	14	8
PPP1R1B	-0.963501	1.18019	-3.60584	0.00185158	0.0139467	-1.20474	92	78	42	42
PPT2-EGFL8	-0.789946	0.420281	-2.32827	0.0309385	0.107226	-3.59734	46	48	20	34
PRDM11	-1.17323	4.02179	-10.611	1.74311e-09	1.81694e-07	12.0128	640	673	293	273
PREX1	-0.715993	1.81698	-3.23541	0.00429916	0.0264912	-2.075	112	131	73	70
PRF1	-4.99854	-2.41876	-9.17867	1.83051e-08	1.20104e-06	6.1857	29	27	1	0
PSD	-0.889695	-0.0034919	-2.32152	0.031372	0.108214	-3.55292	36	36	25	14
PTCH1	-0.888391	3.80765	-7.34263	5.39169e-07	1.8839e-05	6.32979	498	529	239	302
PTCH2	-0.824108	-0.171885	-2.1529	0.0442095	0.137255	-3.81258	28	35	18	16
PTGS1	-1.98119	2.5579	-10.3215	2.75199e-09	2.53896e-07	11.2535	335	296	69	86
PTK2B	-1.2091	5.1185	-14.3126	1.02406e-11	2.95407e-09	17.0819	1397	1446	640	559
PTP4A3	-2.59071	2.50125	-12.9651	5.79373e-11	1.19776e-08	14.3934	372	376	56	64
PTPN6	-1.78946	0.0425246	-4.7423	0.000137079	0.00182814	1.01099	45	58	14	14
PTPRE	-0.86924	0.716014	-2.7901	0.0115746	0.0537924	-2.7925	69	51	28	35
PTPRH	-2.67134	-0.102663	-6.12488	6.50821e-06	0.0001439	3.32124	77	51	12	7
PTPRVP	-0.726697	1.14088	-2.56184	0.0189479	0.0758649	-3.29245	87	66	52	38
PTRF	-0.598155	6.36615	-10.9921	9.68636e-10	1.09227e-07	12.289	2796	2673	1686	1826
PVRL2	-1.57286	-0.0170264	-4.10694	0.000586122	0.00577922	-0.206504	45	46	11	19
RAB26	-1.10878	-0.470702	-2.58231	0.018138	0.0734999	-3.06455	29	27	17	9
RAB3IL1	-0.685033	5.01839	-8.52199	5.83809e-08	3.01732e-06	8.34359	1163	1052	676	662
RAB6B	-0.910052	5.86676	-14.8464	5.35086e-12	1.84367e-09	17.6776	2201	2109	1078	1151
RAC2	-0.627885	6.65585	-11.9287	2.43205e-10	3.86759e-08	13.6661	3412	3339	2160	2088
RAP1GAP	-1.4541	4.79121	-17.0591	4.4181e-13	2.05106e-10	20.1479	1234	1234	433	442
RARG	-2.66484	-0.526912	-5.88732	1.08214e-05	0.000222601	2.71777	46	47	9	5
RASGEF1A	-3.87626	-1.39423	-7.13636	8.10742e-07	2.66044e-05	4.15066	32	47	1	4
RASGRP2	-1.18049	0.201474	-3.2459	0.00419861	0.0259878	-1.86973	38	56	20	19
RASIP1	-0.851552	1.84065	-3.87275	0.00100392	0.00871424	-0.718829	139	120	64	75
RASSF2	-1.21112	-0.162354	-3.03089	0.00680193	0.036715	-2.26902	45	29	13	17
RASSF5	-0.64078	4.91344	-8.13969	1.17623e-07	5.33104e-06	7.65085	1018	1008	633	630
RCSD1	-0.773486	5.337	-9.41386	1.22403e-08	8.46321e-07	9.87674	1442	1407	713	916
REEP6	-0.670115	5.77207	-10.7652	1.37172e-09	1.53287e-07	12.0334	1904	1810	1108	1160
RGCC	-0.60643	4.09884	-5.79648	1.31682e-05	0.000260924	3.05848	588	550	376	351
RGS14	-1.4113	3.34389	-9.90075	5.43263e-09	4.3475e-07	10.8735	419	474	159	166
RGS16	-0.77246	2.19081	-3.88614	0.00097352	0.00847936	-0.74863	177	145	89	93
RGS3	-0.81765	0.308051	-2.24597	0.0366273	0.120574	-3.72202	58	33	22	26
RHOC	-0.818518	2.75096	-4.92705	9.02358e-05	0.00128801	1.44293	228	253	140	125
RHPN1	-0.882987	1.97861	-3.9008	0.000941266	0.00825705	-0.678346	132	157	61	93
RHPN2	-1.06916	0.311709	-3.00474	0.0072098	0.0382018	-2.34033	39	59	20	24
RIMKLB	-0.647504	1.56368	-2.38722	0.0273781	0.0981049	-3.70423	77	128	56	67
RIMS3	-1.48641	2.05128	-6.12681	6.48148e-06	0.000143638	4.02589	155	224	69	60
RNF213	-0.826459	4.90725	-9.15984	1.89101e-08	1.22167e-06	9.51504	1018	1136	620	561
RNF43	-0.636943	1.3355	-2.52193	0.020626	0.0805557	-3.40561	91	78	52	53
ROGDI	-1.06824	4.88654	-13.1021	4.826e-11	1.06906e-08	15.5435	1155	1151	541	528
RP1-167A14.2	-0.996039	-0.0388165	-2.38717	0.0273814	0.0981049	-3.43604	34	39	28	11
RP1-18D14.7	-0.620829	2.16224	-3.13961	0.00533361	0.030843	-2.35015	138	161	92	96
RP1-202O8.2	-1.15188	1.52689	-4.43862	0.000273907	0.00316345	0.529073	113	117	63	40
RP11-1055B8.7	-1.52234	0.499289	-4.62617	0.000178505	0.00225706	0.873629	66	62	24	19
RP11-108K14.4	-0.80139	0.890025	-2.77586	0.0119402	0.054834	-2.84399	68	63	32	41
RP11-218F10.3	-0.729802	0.759117	-2.36178	0.0288652	0.102094	-3.59196	69	49	36	32
RP11-218M22.1	-0.614993	2.30999	-3.27334	0.00394621	0.0247481	-2.10183	156	174	108	101
RP11-244O19.1	-0.710183	1.7243	-3.07693	0.00613761	0.0341088	-2.38591	106	121	74	61
RP11-299G20.2	-0.618952	1.06	-2.16057	0.0435346	0.135816	-4.0002	76	63	35	54
RP11-30L15.4	-0.802245	0.442818	-2.4558	0.0237179	0.0888814	-3.37589	44	52	28	25
RP11-347C12.10	-2.58532	-1.06417	-5.02104	7.30224e-05	0.00108715	1.0841	32	30	7	3
RP11-35G22.1	-2.23201	-0.627403	-4.59781	0.000190424	0.00237627	0.553207	40	35	4	13
RP11-388C12.8	-0.892486	1.02614	-2.67984	0.0147084	0.0633705	-3.04721	76	72	60	25
RP11-423H2.3	-1.18627	0.876273	-3.6421	0.00170411	0.0130722	-1.10562	96	57	34	29
RP11-434D12.1	-1.00988	0.0926014	-2.66291	0.0152559	0.0649844	-2.96172	33	49	23	16
RP11-497H16.5	-1.90778	-0.883747	-2.44349	0.0243395	0.0903103	-3.27502	28	27	36	1
RP11-4K3__A.5	-1.37553	-0.32269	-3.40622	0.00291956	0.0197245	-1.56799	30	39	12	13
RP11-50E11.3	-0.730112	0.696444	-2.38613	0.0274404	0.0982595	-3.53841	62	50	34	31
RP11-522I20.3	-0.938297	0.709158	-2.8892	0.00931213	0.046019	-2.60046	54	68	23	40
RP11-603J24.5	-0.68437	0.616882	-2.0982	0.0493067	0.147694	-4.02065	57	47	39	25
RP11-649A18.5	-0.984895	-0.112702	-2.51778	0.0208086	0.0809401	-3.20271	41	29	20	14
RP11-83A24.2	-0.636206	1.5019	-2.62591	0.0165204	0.068489	-3.24176	104	86	59	59
RP11-861A13.4	-1.08597	0.864322	-3.61962	0.00179409	0.013586	-1.15168	80	63	28	37
RP11-958N24.2	-1.04441	0.544555	-3.19121	0.00474953	0.0283919	-1.99428	52	60	31	22
RP3-402G11.25	-0.672175	0.750587	-2.21569	0.0389521	0.126047	-3.84641	51	63	37	32
RP5-1103G7.4	-0.689082	0.937028	-2.44478	0.0242736	0.0902383	-3.47338	63	67	40	38
RP5-1142A6.8	-1.31907	-0.179386	-3.22861	0.00436563	0.0267943	-1.89842	36	38	20	10
RRAS	-0.691601	1.91104	-3.26181	0.00405034	0.0252421	-2.03854	137	120	76	78
RTN4RL2	-1.0901	1.45215	-4.12238	0.000565693	0.00563603	-0.138345	93	123	55	43
RUNX1T1	-0.64047	1.42498	-2.39122	0.0271511	0.097505	-3.66655	105	77	45	69
S100A11	-0.716498	2.68044	-4.16961	0.000507533	0.00516443	-0.22256	209	233	142	120
S100A16	-2.60053	-0.413423	-6.00331	8.43506e-06	0.000178243	2.96966	45	54	8	7
S100A3	-1.14417	1.2694	-4.25048	0.000421546	0.00446529	0.142603	92	100	49	36
SAMD1	-0.834699	5.79479	-12.7071	8.20736e-11	1.56622e-08	14.9103	2065	1929	1112	1065
SAMD5	-0.610005	1.74341	-2.65809	0.0154153	0.0654163	-3.23189	118	104	79	63
SAMD9L	-0.743734	3.55265	-5.82913	1.22698e-05	0.000245872	3.25562	401	417	213	263
SCARNA15	-0.816643	0.478192	-2.53581	0.0200273	0.0789383	-3.23642	54	45	26	28
SCARNA15	-0.816643	0.478192	-2.53581	0.0200273	0.0789383	-3.23642	2	6	0	3
SCARNA15	-0.816643	0.478192	-2.53581	0.0200273	0.0789383	-3.23642	0	0	0	0
SCPEP1	-0.731805	5.17838	-9.66907	7.96854e-09	6.02694e-07	10.3425	1304	1210	745	726
SDC4	-0.959455	2.90961	-6.01494	8.22757e-06	0.000175051	3.76072	299	265	150	132
SEC14L1	-0.622521	5.43236	-9.24073	1.64503e-08	1.09117e-06	9.55275	1445	1441	882	940
SEC14L4	-0.867709	4.451	-8.86091	3.18701e-08	1.88246e-06	9.06596	750	844	410	437
SELENBP1	-0.824903	6.84932	-16.6033	7.21019e-13	3.19411e-10	19.6156	4120	4146	2279	2257
SELPLG	-0.797752	6.194	-14.1284	1.28721e-11	3.47099e-09	16.7463	2630	2569	1456	1451
SEMA4A	-1.46338	0.00533747	-3.82324	0.00112483	0.00953345	-0.75184	38	52	13	18
SEMA6B	-3.06192	1.53701	-9.70743	7.47561e-09	5.75947e-07	9.56983	268	189	29	23
SEPT5	-3.05035	3.08529	-17.0492	4.46459e-13	2.05106e-10	18.6786	652	662	83	71
SEPT9	-1.98053	1.17428	-6.69739	1.96881e-06	5.4154e-05	4.91946	110	132	23	37
SFXN3	-1.43812	2.49052	-7.85826	1.99413e-07	8.47096e-06	7.33887	260	238	84	94
SH2D3A	-1.00728	2.31428	-5.28804	4.02001e-05	0.000670218	2.28656	182	197	96	87
SH3BP1	-1.29651	3.14114	-8.06193	1.35951e-07	5.9378e-06	7.75258	412	335	159	136
SH3TC2	-1.53397	4.46983	-14.7241	6.19772e-12	2.07774e-09	17.5452	1029	1004	298	388
SHISA7	-1.34349	4.26288	-12.0459	2.05784e-10	3.31499e-08	14.1168	808	837	349	285
SIGIRR	-0.786541	2.35429	-4.29515	0.000380482	0.0041111	0.119797	177	184	97	106
SIGLEC6	-0.961564	1.12666	-3.44284	0.00268618	0.0186454	-1.53718	75	89	34	48
SIPA1	-0.977678	4.34657	-9.50563	1.04803e-08	7.38622e-07	10.2018	785	751	409	352
SKIL	-1.81831	1.82756	-7.81695	2.15671e-07	8.95634e-06	7.09239	193	166	49	49
SLC11A1	-1.24382	2.11884	-5.97153	9.0294e-06	0.000189832	3.71767	190	170	64	84
SLC16A3	-0.771945	5.83638	-12.2717	1.49701e-10	2.57902e-08	14.29	2087	1937	1129	1160
SLC22A4	-1.26924	1.39571	-5.00553	7.56141e-05	0.0011179	1.71831	107	112	47	41
SLC25A29	-1.1436	3.76668	-9.59804	8.97272e-09	6.60804e-07	10.4035	564	525	247	232
SLC25A42	-0.604564	4.78147	-7.35225	5.29085e-07	1.85914e-05	6.14943	901	925	583	584
SLC29A1	-0.616405	8.62838	-15.3817	2.84599e-12	1.06975e-09	18.0079	13073	13322	8509	8230
SLC2A11	-0.679411	1.38204	-2.45317	0.0238493	0.0892389	-3.54268	113	69	51	56
SLC30A1	-1.58369	3.44304	-11.2729	6.3432e-10	7.86811e-08	12.9326	478	537	166	162
SLC44A2	-0.714347	6.42223	-12.9401	5.99075e-11	1.21818e-08	15.1411	2947	2969	1782	1724
SLC45A3	-0.713581	1.87775	-3.1749	0.004927	0.0291438	-2.21328	129	124	61	91
SLC4A8	-0.925577	0.229732	-2.66367	0.0152308	0.0649219	-2.97383	42	44	25	19
SLC6A19	-2.01829	5.79529	-30.0626	1.19939e-17	3.7193e-14	30.2782	3076	2946	710	734
SLC6A9	-1.19706	4.61539	-12.7601	7.63723e-11	1.50369e-08	15.0967	1057	944	427	420
SLC7A8	-1.6987	2.86487	-10.1904	3.39415e-09	3.0063e-07	11.2068	340	367	99	112
SLC9A3R2	-0.658359	2.26103	-3.21523	0.0044994	0.0273046	-2.21258	150	175	82	120
SLFN14	-1.76825	0.770288	-5.66882	1.73792e-05	0.000331139	2.93191	89	80	20	28
SMIM1	-0.644177	4.65418	-7.18461	7.36574e-07	2.4759e-05	5.84283	902	796	516	538
SMIM5	-1.16373	2.76607	-6.71804	1.88724e-06	5.29622e-05	5.20816	249	301	120	117
SNED1	-0.623021	0.976198	-2.21701	0.0388482	0.125881	-3.88645	60	71	41	41
SNORD101	-0.638705	1.8075	-2.5965	0.0175957	0.0719372	-3.36525	135	102	57	93
SNPH	-1.96618	0.9485	-6.10714	6.75839e-06	0.000148637	3.7849	103	101	35	18
SNTA1	-0.908219	3.09928	-6.03447	7.89117e-06	0.000168762	3.77588	300	333	147	181
SNX22	-1.15963	4.70182	-13.4733	2.96403e-11	7.07035e-09	16.0334	1040	1055	442	469
SNX33	-0.801599	0.541457	-2.49696	0.0217463	0.0835187	-3.3155	57	46	31	26
SOCS1	-0.609675	2.10174	-3.05406	0.00645935	0.0352771	-2.51508	135	150	92	89
SOX15	-0.759908	1.12505	-2.83966	0.0103841	0.0497124	-2.75611	77	75	40	47
SPATC1L	-0.722392	5.1465	-9.71096	7.43192e-09	5.75947e-07	10.4189	1212	1239	689	755
SPI1	-1.5525	3.51415	-10.4724	2.16666e-09	2.11616e-07	11.7722	589	471	163	186
SPON2	-0.691312	2.52345	-3.95375	0.000833447	0.0075538	-0.667707	187	206	120	116
SPRY3	-1.06988	-0.223655	-2.77422	0.011983	0.0549083	-2.73821	31	35	14	16
SPTBN4	-0.674572	3.82015	-5.93788	9.7059e-06	0.00020234	3.4306	475	485	302	283
SSBP3	-0.66356	5.76319	-10.5883	1.80595e-09	1.85543e-07	11.7533	1883	1799	1127	1132
SSR4P1	-0.736488	0.271446	-2.18869	0.0411382	0.130439	-3.81391	43	40	23	25
ST6GALNAC4	-0.61281	5.35081	-8.36453	7.77272e-08	3.72815e-06	7.98147	1386	1331	896	833
STAR	-1.00621	0.370892	-3.01821	0.00699676	0.0374086	-2.31912	46	52	21	26
STARD5	-0.975191	1.23398	-3.51162	0.00229636	0.0166185	-1.40601	75	104	46	41
STMN3	-0.997149	4.61097	-10.3189	2.7633e-09	2.53896e-07	11.5091	979	881	480	427
STOML1	-0.612903	3.51066	-4.72212	0.000143506	0.00189421	0.820272	412	349	231	251
STRIP2	-0.615565	5.28134	-8.10294	1.25942e-07	5.58193e-06	7.50324	1298	1293	863	784
STX16-NPEPL1	-1.40242	-0.434389	-3.4088	0.00290248	0.0196734	-1.56912	30	34	10	13
SUSD3	-0.871912	0.634514	-2.75966	0.0123694	0.0560362	-2.84029	57	55	35	25
SYBU	-0.847439	3.08934	-5.50052	2.51276e-05	0.000457013	2.63666	313	302	141	194
SYCP3	-0.703849	0.787058	-2.3753	0.0280658	0.100008	-3.57283	55	63	32	38
SYNC	-1.62912	1.21963	-5.1339	5.66925e-05	0.000883435	1.9662	121	99	51	23
SYNE3	-1.08946	3.78988	-8.60583	5.01937e-08	2.69525e-06	8.70021	528	560	214	286
SYTL1	-1.27693	2.51663	-6.98574	1.09602e-06	3.39028e-05	5.73051	227	253	88	104
SYTL3	-0.850064	1.60238	-3.30866	0.00364311	0.0232934	-1.88115	96	125	47	73
TAGLN	-0.639515	1.17711	-2.43024	0.0250251	0.0920557	-3.54463	77	74	49	45
TAPBPL	-0.734338	1.05186	-2.54305	0.0197212	0.0779299	-3.31168	68	75	51	34
TAS1R3	-1.29407	1.11096	-4.6311	0.000176514	0.0022401	0.935763	91	90	41	31
TCP11L2	-1.05328	0.492155	-3.12188	0.00554997	0.0316805	-2.12654	62	47	30	21
TEX19	-1.67732	-0.390506	-3.24038	0.00425125	0.0262743	-1.8817	49	27	5	22
TGM1	-1.14241	0.454742	-3.23466	0.00430649	0.0264969	-1.90247	44	67	28	20
TGM2	-1.14831	7.21265	-22.2458	3.37842e-15	5.98657e-12	25.0377	6112	5785	2691	2529
THBS3	-0.642478	2.29653	-3.45607	0.00260645	0.0181938	-1.70677	172	158	99	106
TINCR	-0.779483	3.89708	-6.6015	2.3981e-06	6.34201e-05	4.81728	511	539	323	274
TMC6	-0.68052	7.17296	-14.5653	7.51286e-12	2.40116e-09	17.1745	4872	4969	2984	2984
TMC8	-0.857411	5.27732	-11.8745	2.62827e-10	4.07513e-08	13.7972	1391	1420	759	749
TMEM173	-1.06642	6.27451	-18.0448	1.59179e-13	9.64467e-11	21.1998	3086	2948	1437	1365
TMEM63C	-1.90952	0.281537	-5.17359	5.18776e-05	0.000826046	1.87183	71	56	12	21
TMEM86B	-1.01045	2.34097	-5.14616	5.51588e-05	0.000863876	1.9805	199	187	107	81
TMEM9	-0.659001	4.15221	-6.40626	3.59683e-06	8.79981e-05	4.35252	601	601	386	355
TMOD1	-0.626347	5.22689	-8.50395	6.03171e-08	3.0789e-06	8.26655	1306	1202	765	813
TMPRSS9	-0.65349	1.64367	-2.73152	0.0131503	0.0584646	-3.06576	101	109	75	56
TNFAIP8L1	-0.720112	4.84795	-8.51629	5.89853e-08	3.02336e-06	8.36779	1036	955	604	571
TNFRSF14	-0.585975	1.82123	-2.60804	0.017166	0.0705525	-3.34722	103	131	74	76
TNFRSF1B	-0.698168	5.1766	-9.583	9.20176e-09	6.6398e-07	10.1954	1262	1219	737	749
TNFRSF25	-0.877824	0.482059	-2.489	0.0221152	0.0844053	-3.32085	47	54	37	19
TNFSF13	-0.745302	2.11294	-3.76592	0.001283	0.0105253	-0.996729	157	144	85	89
TNK2	-0.788975	5.47346	-11.3105	5.99733e-10	7.66916e-08	12.9294	1607	1538	905	865
TNRC6C-AS1	-0.689534	3.03074	-4.50786	0.000233809	0.00277262	0.454796	257	303	170	166
TNXB	-1.57694	4.95419	-18.991	6.2553e-14	4.56416e-11	22.0492	1479	1405	470	469
TP53INP2	-0.850576	2.37612	-4.53986	0.000217336	0.00261477	0.655355	188	187	88	115
TPH1	-0.712516	1.24874	-2.11964	0.047249	0.143295	-4.10825	57	116	61	38
TPO	-0.760681	4.21466	-7.69625	2.71527e-07	1.06994e-05	6.94465	641	660	373	373
TPPP	-0.618809	1.24767	-2.31079	0.0320737	0.110023	-3.77541	90	69	44	56
TRABD2A	-0.677842	2.12549	-3.09563	0.00588623	0.0330225	-2.43258	155	141	111	73
TRANK1	-0.616688	1.61292	-2.54676	0.0195662	0.0775009	-3.41706	94	110	54	76
TREML2	-4.22984	-1.07317	-7.93466	1.72611e-07	7.46018e-06	5.21044	53	57	5	1
[truncated: 35 more rows]

## Sheet: 12h_up
Supplemental Table 5: The RNA transcriptome analysis of AID-KMT2D HUDEP-2 cells with 5-Ph-IAA treatment for 6 hours, 12 hours and 24 hours vs. without 5-Ph-IAA treatment grown in the expansion culture.
[truncated: 117 more rows]

[truncated: 3 more sheets: Hudep2_limmavoom_IAA24hVSDMSO, 24h_down, 24h_up]
