# Supplementary material for: The H3K4 methyltransferase KMT2D is an essential cofactor for GATA1 at erythroid gene enhancers
Source: Research Square preprint supplement (doi:10.21203/rs.3.rs-7853319/v1), 2025-10-22
Supplement: Supplementary file 6 [file 8293965ddd93aaee0f8319a7.xlsx]

## Sheet: K562_limmavoom_IAA6hVSDMSO
Supplemental Table 6: RNA transcriptome analysis of AID-KMT2D K562 cells with 5-Ph-IAA treatment for 6 hours, 12 hours and 24 hours vs. without 5-Ph-IAA treatment grown in the expansion culture.
gene_name	logFC	AveExpr	t	P.Value	adj.P.Val	B	C13_D6_1	C13_D6_2	C13_I6_1	C13_I6_2
A1BG-AS1	-0.349157	0.804255	-1.17488	0.254701	0.585326	-4.9022	50	55	40	41
AAAS	0.00621831	6.69239	0.122248	0.903999	0.96875	-7.2032	2753	2794	2758	2730
AACS	0.117564	5.24243	1.64082	0.117447	0.422534	-5.54312	943	1010	1016	1073
AACSP1	-0.198896	2.9659	-1.34789	0.193701	0.52083	-5.26934	200	251	195	191
AADAT	0.411568	1.70486	1.59609	0.127129	0.438137	-4.60906	96	60	109	89
AAED1	0.188909	4.14018	1.95672	0.0653883	0.32186	-4.73642	414	474	502	495
AAGAB	0.00435427	6.32536	0.080408	0.936762	0.979172	-7.12293	2006	2304	2132	2124
AAK1	-0.15816	2.35222	-0.889227	0.38511	0.703424	-5.55899	142	147	127	128
AAMDC	-0.469874	0.952853	-1.25237	0.225779	0.556391	-4.85328	71	52	26	71
AAMP	-0.0167781	7.61024	-0.411797	0.685142	0.877237	-7.30305	5058	5511	5132	5160
AAR2	0.0250317	5.95428	0.388562	0.701962	0.886258	-6.95514	1582	1724	1784	1537
AARS	0.0879273	7.81839	2.20661	0.0399753	0.251118	-5.15308	5578	6201	6146	6184
AARS2	0.0714607	6.14908	1.27417	0.218118	0.547327	-6.26905	1829	1892	1932	1920
AARSD1	0.238677	2.76336	1.52404	0.144131	0.459668	-4.98188	165	170	187	203
AASDH	0.0970854	4.38295	0.877031	0.391531	0.710288	-6.21828	578	510	635	511
AASDHPPT	0.151015	6.84283	2.48426	0.0225753	0.182777	-4.44909	2591	3299	3343	3076
AASS	0.00909467	3.5361	0.0762936	0.939991	0.980471	-6.33033	312	309	311	304
AATF	0.000862417	6.95093	0.0187236	0.985259	0.994801	-7.26641	3197	3453	3269	3287
AATK	-0.221384	0.437099	-0.649271	0.524011	0.793396	-5.21962	42	36	38	28
ABAT	-0.496893	4.7144	-6.11255	7.38669e-06	0.00078203	3.84895	817	859	603	567
ABC7-42389800N19.1	-0.0963171	4.14185	-0.958724	0.349857	0.673351	-6.06805	493	488	478	426
ABC7-43041300I9.1	-0.454082	1.91209	-2.15204	0.044597	0.265685	-3.83174	114	122	93	77
ABCA1	-0.784141	-0.380711	-1.58826	0.128893	0.439887	-4.35343	20	35	28	8
ABCA11P	-0.491069	0.247133	-1.33264	0.198566	0.527973	-4.66074	30	46	22	31
ABCA17P	0.250022	0.818429	0.845197	0.408621	0.721254	-5.17947	41	45	53	48
ABCA2	-0.0320918	5.34119	-0.460995	0.650087	0.861626	-6.76756	1097	1106	1077	1045
ABCA3	0.102308	6.92937	2.2169	0.039154	0.249209	-4.97516	3070	3254	3367	3322
ABCA5	0.514807	0.0538649	1.38429	0.182472	0.507766	-4.58707	20	26	35	30
ABCA7	-0.549872	5.13186	-7.32175	6.46328e-07	0.000122793	6.21037	1099	1182	818	719
ABCB10	0.154231	6.4478	2.68084	0.0148712	0.148273	-3.97246	2018	2445	2523	2361
ABCB10P1	0.0727971	0.700685	0.209821	0.836063	0.943709	-5.43818	32	55	58	33
ABCB10P3	-0.20715	0.336453	-0.598038	0.556946	0.812709	-5.225	35	37	36	26
ABCB10P4	-0.0440048	1.81444	-0.197931	0.845222	0.947757	-5.7474	85	107	103	81
ABCB6	-0.122747	2.09432	-0.616946	0.544665	0.805841	-5.67307	123	116	116	100
ABCB7	0.0650369	4.98215	0.850781	0.40559	0.719167	-6.41627	790	871	832	881
ABCB8	-0.18006	6.63631	-3.6202	0.00184627	0.04368	-1.99848	2677	3021	2532	2421
ABCB9	-0.442852	2.88428	-2.7234	0.0135697	0.140372	-3.0026	248	216	183	152
ABCC1	0.0540272	6.72716	1.12193	0.276007	0.6079	-6.58059	2643	2951	2909	2811
ABCC10	0.00767806	5.6672	0.10849	0.914756	0.972983	-6.95395	1390	1336	1419	1280
ABCC4	0.00311762	6.84142	0.0630376	0.950401	0.983519	-7.24133	2920	3243	3186	2902
ABCC5	-0.0940515	6.8287	-1.85423	0.0794512	0.354478	-5.5868	3155	3158	2965	2861
ABCD1	-0.272291	5.51989	-4.20071	0.000493679	0.0179236	-0.455056	1285	1427	1134	1078
ABCD3	0.0706603	4.93127	0.917232	0.37063	0.691204	-6.34398	738	865	847	810
ABCD4	-0.183583	4.76597	-1.94639	0.0666988	0.325376	-4.93454	773	786	762	598
ABCE1	0.1621	8.35381	4.13289	0.000575898	0.0196727	-1.12379	7834	8812	9545	8805
ABCF1	0.0744494	8.53196	2.00102	0.0600296	0.308124	-5.61289	9290	10111	10445	9691
ABCF2	0.0984689	7.48132	2.22567	0.0384672	0.247212	-5.06429	4311	4989	4878	4921
ABCF3	-0.0747238	5.80786	-1.20847	0.241836	0.572262	-6.26162	1490	1600	1415	1477
ABCG2	-0.0277987	3.52806	-0.221371	0.827189	0.939259	-6.30554	310	315	280	326
ABHD10	0.22359	4.33773	2.27966	0.0344746	0.232766	-4.22641	459	549	627	534
ABHD11	-0.0541142	3.45783	-0.444701	0.661609	0.866727	-6.20668	298	303	284	286
ABHD12	-0.130481	5.1954	-1.82691	0.0836225	0.364361	-5.24219	963	1100	958	898
ABHD13	0.208466	4.0495	2.01346	0.0585971	0.305462	-4.61405	406	421	449	494
ABHD14A	0.221629	2.21315	1.14648	0.265971	0.59621	-5.27572	98	134	136	129
ABHD14B	-0.000932821	5.43149	-0.014032	0.988952	0.99599	-6.90028	1097	1225	1176	1110
ABHD15	0.208534	3.63093	1.76686	0.0934703	0.381389	-4.89039	278	343	368	338
ABHD16A	-0.114685	1.93402	-0.537618	0.597144	0.833226	-5.66619	98	115	87	108
ABHD16B	-0.244345	3.84924	-2.30403	0.0328013	0.225879	-4.0422	399	444	361	340
ABHD17A	-0.112134	6.89313	-2.35579	0.0294927	0.212706	-4.70749	3257	3385	3030	3025
ABHD17B	0.0559423	4.35898	0.625347	0.539256	0.802375	-6.40042	510	572	565	543
ABHD2	0.0151145	7.90387	0.360447	0.722528	0.896076	-7.36903	6337	6468	6344	6408
ABHD3	-0.0620937	4.27888	-0.673785	0.508642	0.78373	-6.34313	504	562	499	507
ABHD4	-0.16518	3.6173	-1.40891	0.175175	0.499486	-5.39607	341	357	328	286
ABHD5	0.0952214	5.21963	1.34938	0.193232	0.520073	-5.94229	917	1022	1058	983
ABHD6	-0.118229	3.1909	-0.87999	0.389967	0.708915	-5.83238	238	273	225	239
ABHD8	-0.164911	3.55955	-1.35341	0.191964	0.51847	-5.44889	307	365	318	273
ABI1	0.138843	5.47071	2.12118	0.0474209	0.27518	-4.80883	1073	1200	1243	1222
ABI2	-0.140388	6.13015	-2.19869	0.0406174	0.253179	-4.82996	1857	2101	1914	1631
ABL1	-0.0109053	8.32664	-0.295199	0.771075	0.915	-7.44759	8182	9160	8626	8323
ABL2	0.143904	6.41827	2.80338	0.0114127	0.127853	-3.71522	2081	2295	2418	2345
ABLIM1	-0.0620233	4.72302	-0.776956	0.446844	0.744773	-6.40449	684	767	694	675
ABO	0.0465551	4.25155	0.49454	0.62665	0.849894	-6.44078	502	505	523	501
ABR	-0.112071	2.1774	-0.53486	0.599012	0.834442	-5.74438	140	114	132	99
ABRACL	-0.0629032	4.22491	-0.667641	0.51247	0.786699	-6.33007	477	551	489	480
ABT1	0.113519	6.54557	2.2379	0.0375269	0.244156	-4.85471	2296	2534	2555	2593
ABTB1	-0.000676695	0.910859	-0.00231372	0.998178	0.999259	-5.50957	43	58	53	46
ABTB2	0.0873643	3.32993	0.684004	0.502312	0.780224	-6.02913	248	276	290	259
AC000068.5	0.102686	2.20239	0.530836	0.601743	0.835614	-5.755	118	120	141	112
AC000078.5	-0.267147	1.82281	-1.24596	0.228071	0.55908	-5.05959	96	112	86	84
AC000089.3	-0.309788	0.884818	-0.956306	0.351046	0.674329	-5.10942	46	65	59	32
AC000120.7	-0.180211	0.134122	-0.435784	0.667953	0.869634	-5.25158	22	43	38	19
AC000123.4	-0.206438	1.00264	-0.702909	0.49072	0.773737	-5.31553	48	68	43	56
AC002056.3	-0.0294843	0.384045	-0.0864899	0.931991	0.977892	-5.37999	32	38	30	38
AC002116.7	0.224746	0.128858	0.541713	0.594374	0.831828	-5.20922	31	23	21	45
AC002310.12	0.246207	1.15647	0.911249	0.373692	0.693253	-5.20701	54	55	59	69
AC002467.7	-0.0284852	1.59424	-0.118725	0.906752	0.969752	-5.69199	68	97	83	75
AC002472.1	-0.678115	-0.0117371	-1.73894	0.0983829	0.389182	-4.20295	37	30	24	17
AC002480.2	-0.198164	3.1256	-1.36608	0.188023	0.514652	-5.29608	263	240	232	199
AC002539.1	-0.319024	1.02327	-1.06197	0.30169	0.634356	-5.04987	71	52	55	41
AC003104.1	0.0310529	2.75283	0.189425	0.851788	0.950267	-6.05142	152	209	186	175
AC003665.1	-0.278322	0.487043	-0.833769	0.414872	0.725088	-5.11813	42	40	29	38
AC004057.1	0.352045	5.01183	2.61331	0.0171826	0.160213	-3.76671	685	858	1218	765
AC004074.3	-0.0286449	2.42416	-0.155144	0.87836	0.961232	-5.95064	132	159	125	158
AC004158.2	-0.00183347	0.821116	-0.00612586	0.995177	0.998085	-5.48689	46	48	42	51
AC004166.6	0.476317	0.466234	1.42322	0.171044	0.494845	-4.59748	29	33	38	48
AC004257.3	0.0264585	1.07022	0.0836822	0.934193	0.978383	-5.54787	43	71	74	42
AC004381.6	0.0806937	5.69452	1.15564	0.262293	0.59266	-6.29373	1227	1489	1494	1333
AC004447.2	0.0449408	3.8283	0.41981	0.67938	0.87527	-6.33948	371	380	385	378
AC004453.8	0.0428559	0.968593	0.148396	0.883609	0.96214	-5.51461	46	57	47	58
AC004463.6	0.106524	3.93164	1.03816	0.312356	0.642106	-5.92441	377	413	422	416
AC004471.9	0.396303	1.47165	1.50112	0.149922	0.469442	-4.67934	76	55	75	93
AC004540.5	-0.5364	1.15012	-1.5194	0.145288	0.46164	-4.59324	63	80	29	81
AC004797.1	0.139419	3.76344	1.26539	0.221181	0.551224	-5.62115	321	375	390	365
AC004840.9	-0.0941506	2.30051	-0.508275	0.617168	0.844799	-5.79695	139	134	136	116
AC004893.11	-0.0844034	2.15108	-0.426473	0.674603	0.873012	-5.78624	132	114	114	113
AC004951.6	-0.06496	0.257497	-0.186418	0.854112	0.951308	-5.34067	29	36	31	30
AC004967.7	-0.36484	2.51883	-2.15643	0.0442077	0.265029	-3.95044	165	184	141	126
AC004980.7	0.159597	3.24885	1.16592	0.258217	0.589209	-5.57151	241	242	292	241
AC004987.9	-1.10907	0.792567	-3.33864	0.00348713	0.0637293	-1.83867	72	64	23	41
AC005003.1	0.292174	0.814854	0.892196	0.383557	0.701511	-5.14432	47	38	40	65
AC005076.5	-0.384225	1.04689	-1.21217	0.240451	0.570152	-4.91281	77	52	60	37
AC005083.1	0.0701854	2.07938	0.344664	0.73417	0.901454	-5.79386	120	102	119	109
AC005104.3	0.0780012	0.669496	0.232189	0.818898	0.935219	-5.42646	46	37	55	33
AC005154.6	-0.0049061	4.88947	-0.0600808	0.952725	0.983906	-6.75849	800	796	831	737
AC005229.1	-0.00873945	0.199738	-0.0225037	0.982283	0.994004	-5.34227	36	26	40	22
AC005253.2	-0.236855	1.07187	-0.801025	0.433118	0.7356	-5.26801	57	65	66	39
AC005306.3	0.18385	0.185644	0.492515	0.628054	0.850882	-5.24102	24	33	40	25
AC005307.3	0.0421721	1.58237	0.178928	0.859907	0.953245	-5.68011	82	76	85	75
AC005329.7	0.419841	0.367033	1.21382	0.239834	0.569369	-4.79138	29	30	46	33
AC005330.2	-0.222788	0.137488	-0.619066	0.543297	0.804676	-5.17514	29	34	26	27
AC005546.2	-0.773589	-0.0705179	-1.98982	0.0613458	0.311331	-3.90409	33	33	22	16
AC005618.6	-1.35413	-0.247557	-3.42662	0.0028604	0.0567538	-1.93877	40	32	15	12
AC005682.5	0.33514	2.04572	1.49789	0.150754	0.470361	-4.81945	99	98	152	98
AC005785.2	-0.217346	0.543441	-0.653108	0.521589	0.791606	-5.24004	37	47	43	29
AC005943.4	-0.446874	0.158129	-1.23136	0.23336	0.562962	-4.7447	34	35	22	28
AC005943.5	0.222508	1.90898	1.04371	0.309846	0.63979	-5.28936	87	99	98	117
AC006014.1	-0.176385	-0.0886719	-0.420474	0.678903	0.875228	-5.21285	23	30	16	33
AC006042.6	-0.0341742	0.157874	-0.0899287	0.929294	0.977059	-5.3302	22	40	26	32
AC006116.20	0.11643	0.186755	0.320151	0.752382	0.907847	-5.29791	23	36	32	30
AC006126.4	-1.23849	1.68139	-5.00527	8.08165e-05	0.00487323	1.32515	122	142	45	67
AC006262.5	-0.0848707	1.31679	-0.318557	0.753572	0.908571	-5.57169	56	83	59	69
AC006486.1	0.311493	1.53879	1.24722	0.227619	0.558734	-4.98653	62	78	101	72
AC006538.1	0.09335	2.11143	0.466075	0.646513	0.860318	-5.7568	100	125	131	106
AC006547.13	-0.0601691	3.26447	-0.450258	0.657669	0.865473	-6.13927	245	282	235	264
AC006547.14	0.107556	0.0827463	0.280157	0.782414	0.920086	-5.28602	28	26	37	22
AC006946.16	0.220247	1.47739	0.905815	0.376489	0.695369	-5.29143	72	66	81	77
AC006978.6	-0.0245018	2.81267	-0.159605	0.874893	0.959808	-6.07634	190	190	179	189
AC007038.7	-0.453563	0.695126	-1.34941	0.193222	0.520073	-4.70865	42	60	28	47
AC007128.1	-0.0902129	2.27531	-0.489978	0.629814	0.852163	-5.79792	123	145	120	128
AC007131.1	-0.123823	0.966123	-0.431234	0.671199	0.870956	-5.44127	58	51	48	50
AC007246.3	-0.0566382	2.0277	-0.249428	0.805733	0.929599	-5.80418	118	105	86	129
AC007308.6	-0.518397	0.658937	-1.65679	0.114144	0.415948	-4.35556	45	56	34	35
AC007318.5	0.124552	5.77133	1.80964	0.0863569	0.368631	-5.41119	1338	1476	1639	1391
AC007383.3	-0.0923968	2.5819	-0.515252	0.612378	0.841206	-5.88241	139	196	143	165
AC007405.4	-0.186795	0.68256	-0.569092	0.576025	0.822615	-5.31384	39	53	50	31
AC007405.6	-0.275697	2.28915	-1.47025	0.158022	0.480392	-4.91966	126	164	123	112
AC007551.3	-0.122641	0.903655	-0.422599	0.677378	0.874601	-5.42898	53	51	45	49
AC007620.3	-0.12531	2.38476	-0.617329	0.544418	0.805686	-5.76395	156	137	110	158
AC007969.5	-0.169431	4.07314	-1.17699	0.253875	0.584202	-5.81972	485	473	340	519
AC008132.12	-0.314371	1.02858	-1.07456	0.296162	0.629401	-5.03996	54	68	59	39
AC008746.5	0.145482	0.129407	0.38692	0.703157	0.886552	-5.26699	33	23	33	27
AC008982.2	-0.462141	1.22868	-1.76295	0.0941455	0.382389	-4.29652	70	77	56	49
AC009005.2	-0.56937	1.32364	-2.03262	0.0564501	0.299964	-3.9267	97	69	60	48
AC009120.6	-0.44987	1.18549	-1.69	0.10753	0.406689	-4.38639	72	70	51	51
AC009133.12	0.312791	1.53755	1.27379	0.21825	0.54756	-4.95768	66	73	75	97
AC009133.14	0.0314851	1.30904	0.114694	0.909903	0.971723	-5.61005	66	65	83	52
AC009245.3	-0.166546	2.72148	-1.06442	0.300608	0.633207	-5.51065	176	199	165	164
AC009299.3	-0.0711124	2.03029	-0.34768	0.73194	0.900741	-5.7768	111	113	96	115
AC009299.5	-0.342214	0.870439	-1.15719	0.261677	0.592317	-4.9315	58	52	45	40
AC009336.24	-0.285499	-0.15102	-0.689174	0.499126	0.77867	-5.08674	22	31	16	28
AC009403.2	-0.0762186	3.12046	-0.553502	0.586438	0.827949	-6.03907	234	245	216	232
AC009404.2	-0.0173881	2.82145	-0.111937	0.912059	0.972181	-6.08573	197	185	194	177
AC009478.1	-0.18342	-0.404728	-0.368185	0.716846	0.89335	-5.16998	28	16	11	30
AC009506.1	-0.0672129	2.00387	-0.322618	0.750543	0.906889	-5.77642	97	124	115	93
AC009948.5	0.0777575	4.21575	0.781569	0.444193	0.743334	-6.24453	432	544	517	495
AC009961.3	-0.100871	0.109724	-0.264161	0.794527	0.924829	-5.295	29	30	21	35
AC010525.6	-0.112401	0.973378	-0.377732	0.709857	0.890551	-5.46218	56	53	61	40
AC010536.1	0.149722	2.89299	0.963647	0.347447	0.671743	-5.66148	164	217	220	195
AC010642.1	0.235447	1.77962	1.0151	0.322934	0.65032	-5.27923	81	88	84	115
AC010761.13	-0.19638	0.80868	-0.616427	0.545	0.806165	-5.31877	57	44	52	35
AC010761.8	-0.196038	3.62386	-1.59246	0.127943	0.439038	-5.14729	310	403	321	290
AC010976.2	-0.399161	0.783251	-1.30587	0.20734	0.536994	-4.76876	46	60	44	35
AC011043.1	0.0425319	6.0285	0.651972	0.522306	0.792284	-6.83299	1597	1868	1886	1633
AC011242.6	0.142525	1.77199	0.644202	0.527221	0.794738	-5.55797	90	84	91	98
AC011290.5	-0.847994	0.395948	-2.50714	0.0215157	0.1783	-3.1912	44	50	25	26
AC011330.5	-0.748435	0.213368	-1.94801	0.0664912	0.32505	-3.96004	31	51	30	18
AC012146.7	-0.304329	3.36437	-2.25165	0.0364956	0.240227	-4.00106	295	319	221	272
AC012314.8	0.405384	0.642823	1.27615	0.217434	0.5466	-4.77546	35	37	54	41
AC012358.4	0.0439409	1.85359	0.194838	0.847609	0.948422	-5.76033	79	114	108	87
AC012512.1	0.400911	0.808577	1.26479	0.221391	0.551548	-4.81522	34	48	65	43
AC012531.25	-0.252902	0.352762	-0.747497	0.464005	0.756558	-5.14686	35	39	31	30
AC013394.2	-0.056104	5.13089	-0.735646	0.471019	0.762081	-6.54656	881	1043	885	937
AC015815.6	0.0359	0.0728701	0.092618	0.927186	0.976323	-5.31207	22	34	35	22
AC015849.16	0.00517766	0.896058	0.0161804	0.987261	0.995265	-5.50568	57	43	39	61
AC015849.19	-0.159208	1.86896	-0.700066	0.492453	0.774972	-5.55172	106	101	110	75
AC016629.3	0.259007	2.97954	1.71789	0.102232	0.395827	-4.76998	193	194	253	205
AC016629.8	-0.177085	1.8281	-0.828631	0.417702	0.726679	-5.44887	97	105	86	90
AC016710.1	-0.32696	1.14632	-1.18447	0.250976	0.582054	-4.96163	55	79	52	52
AC016722.4	-0.388184	0.0815149	-0.998477	0.330718	0.657501	-4.92743	32	32	18	32
AC016723.4	-0.191839	1.69621	-0.825559	0.4194	0.727284	-5.41306	99	87	88	72
AC016734.2	-0.170252	3.61989	-1.42853	0.169532	0.493335	-5.37124	321	381	330	285
AC016739.2	-0.531976	3.33855	-3.37726	0.00319699	0.0612419	-1.77603	344	310	187	264
AC016757.3	0.161911	2.94151	1.09482	0.287414	0.620933	-5.54899	200	190	220	209
AC016773.1	0.115452	2.46752	0.51299	0.613929	0.842361	-5.84739	165	124	197	116
AC017074.2	0.0363735	-0.0148701	0.0953719	0.925028	0.975685	-5.29374	29	23	27	25
AC018470.4	-0.550945	0.0371979	-1.46594	0.159178	0.481174	-4.50305	35	31	24	20
AC018638.1	-0.485768	1.59641	-1.68074	0.109341	0.409514	-4.47234	78	116	48	95
AC018720.10	0.0246852	0.502137	0.0739891	0.9418	0.980986	-5.40781	41	34	42	33
AC018755.1	-0.156091	0.256694	-0.415518	0.682463	0.876475	-5.28384	40	28	24	36
AC018755.16	-0.163488	0.22105	-0.445833	0.660806	0.866594	-5.26578	37	29	34	24
AC018766.4	-0.197896	0.82923	-0.611421	0.548238	0.807621	-5.32618	63	41	39	48
AC018766.5	-0.133471	2.22697	-0.718727	0.481141	0.76727	-5.65015	122	141	120	116
AC018804.1	-0.042042	-0.105073	-0.0973429	0.923484	0.975685	-5.2753	31	20	17	33
AC018804.7	-0.405411	2.70463	-2.43716	0.024913	0.194878	-3.49993	184	219	136	165
AC018890.6	0.00177853	3.02408	0.0118099	0.990702	0.996594	-6.16	207	229	194	239
AC022007.5	-0.0516781	2.57113	-0.260467	0.797333	0.926404	-5.97612	178	148	128	185
AC022400.1	0.0154509	0.29861	0.0442785	0.965149	0.98855	-5.36327	29	36	29	36
AC022431.1	0.331809	2.57467	1.93931	0.0676086	0.327235	-4.31963	133	152	196	159
AC023490.1	-0.440004	0.159159	-1.22078	0.23725	0.56742	-4.75448	32	37	23	27
AC024162.2	-0.402136	0.0872736	-1.02246	0.319531	0.648082	-4.91	26	40	32	18
AC024560.3	-0.0677409	4.18488	-0.681744	0.503707	0.780387	-6.30779	476	525	509	434
AC024937.6	-0.0400903	1.1261	-0.149182	0.882998	0.962119	-5.55582	58	60	57	56
AC025171.1	0.0809123	2.49573	0.446154	0.660578	0.866594	-5.88761	151	143	137	171
AC025335.1	-0.0770794	1.97472	-0.36378	0.720078	0.894471	-5.75355	109	107	90	113
AC026271.5	-0.082299	2.66947	-0.511163	0.615184	0.842998	-5.91262	159	193	166	161
AC026740.1	-0.335543	0.784153	-1.02328	0.319153	0.647624	-5.0335	62	43	34	47
AC027601.1	-0.141885	1.03302	-0.494732	0.626517	0.849879	-5.43218	48	68	57	46
AC027612.1	-0.0659071	1.45449	-0.252686	0.803251	0.928606	-5.6278	79	71	59	84
AC027612.6	-0.00891546	3.31442	-0.0666939	0.947529	0.982561	-6.2563	257	279	291	236
AC027763.2	-0.190573	1.65899	-0.819817	0.422586	0.728598	-5.40699	77	105	78	78
AC034220.3	0.232947	1.27309	0.861213	0.399964	0.715848	-5.27392	59	60	83	57
AC062029.1	-0.670916	0.892614	-2.30438	0.0327779	0.225831	-3.48419	60	65	40	37
AC068831.6	-0.0413262	0.237599	-0.106537	0.916284	0.973571	-5.34601	22	45	37	25
AC069277.2	0.0858729	3.39828	0.605403	0.552145	0.809847	-6.10219	230	326	314	264
AC069282.6	-0.125802	1.57041	-0.524765	0.605875	0.837976	-5.56332	79	87	86	65
AC069547.1	-0.246617	1.06606	-0.803073	0.431962	0.734897	-5.26506	76	49	45	56
AC073046.25	0.048565	1.31932	0.180008	0.859071	0.953065	-5.6041	77	56	65	68
AC073415.2	1.12786	-0.184929	2.89667	0.00931128	0.115096	-2.69913	16	15	36	32
AC073657.1	0.884423	-0.150552	2.08344	0.0510951	0.285281	-3.78936	11	27	33	31
AC074117.10	0.0908549	5.63135	1.25523	0.224765	0.555068	-6.16159	1242	1341	1481	1238
AC074212.3	-0.237086	3.00821	-1.66961	0.111551	0.412727	-4.84886	222	247	204	188
AC074286.1	0.145467	1.07723	0.502986	0.620811	0.847166	-5.43992	53	54	72	47
AC074389.9	0.232144	1.98549	1.12623	0.274231	0.606155	-5.2308	103	93	116	110
AC079135.1	0.321952	0.211898	0.900733	0.379116	0.697343	-5.02081	24	31	31	37
AC079250.1	-0.220072	0.654749	-0.689393	0.498991	0.778547	-5.24382	39	52	34	43
AC079466.1	0.0454711	9.61142	1.28594	0.214067	0.543402	-6.8057	20534	20851	21470	20630
AC079807.2	-0.208985	1.51521	-0.833766	0.414873	0.725088	-5.35688	88	77	81	60
AC079922.3	-0.386313	0.0789447	-1.0557	0.304474	0.636341	-4.8829	30	34	25	23
AC083799.1	-0.0449499	2.22173	-0.239181	0.813551	0.933588	-5.86955	130	124	122	120
AC083843.1	0.0874557	2.61384	0.523316	0.606864	0.838145	-5.88872	140	180	164	170
AC083899.3	0.373653	2.40909	2.12512	0.0470514	0.274529	-3.97842	126	124	160	159
AC084018.1	-0.168536	4.35389	-1.8209	0.0845661	0.365085	-5.02146	587	578	514	506
AC084125.4	-0.239466	1.80326	-1.06135	0.301965	0.634538	-5.2425	94	109	74	97
AC090587.2	-0.331315	0.901272	-0.958142	0.350143	0.673621	-5.11142	37	83	52	37
AC090616.2	0.0812628	0.49701	0.249833	0.805424	0.929568	-5.38253	33	40	39	37
AC090945.1	0.306498	1.1794	1.13702	0.269804	0.600777	-5.01523	48	61	62	71
AC091729.9	-0.0183574	3.45661	-0.136022	0.893249	0.966027	-6.29721	265	330	262	319
AC092171.4	-0.131448	4.36446	-1.44373	0.165262	0.487481	-5.58046	538	622	542	501
AC092295.7	-0.16517	1.30189	-0.602853	0.553805	0.810804	-5.44893	54	89	59	64
AC092299.8	0.049296	0.125734	0.135851	0.893382	0.966027	-5.31919	25	32	31	27
AC092301.3	-0.218891	0.571518	-0.666673	0.513075	0.787063	-5.23856	48	38	39	33
AC092811.1	0.191927	0.770699	0.606028	0.551738	0.809681	-5.31575	40	45	60	38
AC093110.3	0.020205	0.475085	0.0582983	0.954126	0.984101	-5.40244	45	30	39	34
AC093323.3	0.12529	6.02423	2.17154	0.042892	0.260929	-4.85389	1631	1719	1859	1742
AC093375.1	-0.0870808	1.07556	-0.314597	0.75653	0.909686	-5.50795	54	62	60	48
AC093391.2	-0.476026	0.0168302	-1.11055	0.280753	0.612517	-4.82911	23	43	33	15
AC093616.4	0.289618	3.33178	2.16084	0.0438201	0.264209	-4.15323	242	247	325	266
AC093627.9	-0.230729	2.3485	-1.15459	0.262716	0.593131	-5.30604	161	136	108	142
AC093642.3	-0.484635	1.03506	-1.72346	0.1012	0.39392	-4.32015	57	73	44	47
AC093642.5	-0.137826	1.54748	-0.575386	0.571849	0.820672	-5.53118	71	94	72	75
AC093673.5	-0.345648	1.83907	-1.60485	0.125181	0.435121	-4.62806	110	106	82	85
AC093724.2	0.03147	1.4567	0.130194	0.897795	0.966376	-5.65028	71	74	75	71
AC093838.4	0.10615	5.73559	1.67841	0.1098	0.40958	-5.60777	1317	1445	1537	1394
AC096559.1	0.155248	1.22538	0.560696	0.581621	0.825335	-5.45087	58	60	54	78
AC096582.7	0.450743	2.03486	2.16016	0.0438797	0.264365	-3.84171	86	102	144	111
AC097662.2	0.510468	0.330372	1.40338	0.176793	0.502345	-4.60042	31	25	32	48
AC097721.2	0.66008	-0.122898	1.65179	0.115169	0.417503	-4.29444	23	16	29	31
AC097724.3	0.0306742	-0.525016	0.0599856	0.9528	0.983906	-5.19878	27	12	12	27
AC104131.1	0.230024	2.17888	1.20086	0.244706	0.574835	-5.20824	113	111	138	121
AC104135.3	0.241085	2.8539	1.5317	0.142239	0.456436	-4.99791	169	188	233	185
AC104389.28	0.265698	1.34024	0.974494	0.342176	0.666925	-5.19958	53	71	61	88
AC104534.2	0.159236	0.612366	0.456883	0.652987	0.862831	-5.34694	48	31	52	34
AC105760.2	0.141977	0.300397	0.406759	0.688775	0.879425	-5.29624	31	31	30	38
AC108463.2	-0.38403	1.13597	-1.42712	0.169933	0.493929	-4.70032	64	70	49	52
AC108488.4	-0.120149	1.93219	-0.584747	0.565665	0.816856	-5.64064	102	111	99	94
AC110781.3	-0.733777	-0.175263	-1.71882	0.102058	0.395715	-4.21815	26	35	26	12
AC113189.5	-0.278542	2.8723	-1.80899	0.0864624	0.368798	-4.60136	207	226	195	158
AC116366.5	-0.241161	1.67716	-1.0683	0.298903	0.631933	-5.20168	91	95	82	73
AC116407.2	-0.226141	1.01462	-0.758661	0.457455	0.751712	-5.28309	46	73	44	55
AC118138.2	0.279225	0.442865	0.807666	0.429377	0.732235	-5.12698	28	38	48	32
AC118278.1	-0.122002	0.535597	-0.366431	0.718132	0.894025	-5.36086	32	50	39	34
AC125232.1	0.052683	2.75705	0.339962	0.737651	0.902653	-6.0132	169	187	178	186
AC127496.1	0.338517	1.72365	1.39928	0.178002	0.503131	-4.85988	94	66	101	94
AC131097.3	0.17816	0.0934734	0.469908	0.643821	0.859105	-5.23127	32	22	28	31
AC132192.1	-0.283692	-0.0117821	-0.714117	0.483921	0.76905	-5.0977	35	24	20	27
AC132872.1	-0.527381	0.3603	-1.45293	0.162719	0.484592	-4.55191	37	45	21	37
AC133528.2	-0.0490699	3.06559	-0.340578	0.737195	0.902397	-6.11564	210	248	238	199
AC137932.1	-0.130655	1.83473	-0.580156	0.568693	0.819025	-5.61317	84	118	100	81
AC137932.5	-0.0146265	1.41408	-0.0567093	0.955375	0.984624	-5.64434	73	70	60	81
AC137934.1	0.0775016	3.86614	0.64125	0.529095	0.795501	-6.23282	396	368	443	353
AC138035.2	-0.00204082	3.78316	-0.0174454	0.986265	0.994801	-6.4146	346	395	405	327
AC138123.2	-0.511594	0.743752	-1.58848	0.128842	0.439887	-4.44797	57	50	46	29
AC139099.3	-0.00950637	0.734009	-0.028374	0.977663	0.992403	-5.465	48	41	33	57
AC141586.5	0.145728	3.02815	0.922242	0.368079	0.690409	-5.74256	229	190	248	206
AC144530.1	0.0795937	1.38013	0.277615	0.784336	0.920981	-5.60066	79	58	56	88
AC144652.1	0.00982108	1.4701	0.0399075	0.968587	0.989381	-5.66128	79	69	72	74
AC145212.1	0.0141647	2.8167	0.0936847	0.92635	0.975927	-6.08607	184	192	190	184
AC156455.1	-0.230028	2.62389	-1.26672	0.220715	0.551224	-5.26278	165	194	182	124
ACAA1	0.0596919	5.63879	0.90897	0.374863	0.694091	-6.53094	1210	1418	1334	1362
ACAA2	-0.0534355	5.07763	-0.685989	0.501087	0.779662	-6.56872	908	940	838	919
ACACA	0.187869	8.23725	4.86506	0.000110421	0.0059639	0.548791	7323	7879	8425	8639
ACACB	0.120348	2.5084	0.697903	0.493774	0.776138	-5.75186	152	141	163	150
ACAD10	-0.0127215	4.39586	-0.143592	0.88735	0.963993	-6.60144	533	604	563	547
ACAD8	-0.0465799	5.598	-0.696362	0.494716	0.776529	-6.69266	1295	1350	1224	1301
ACAD9	0.0239735	5.03125	0.325868	0.748121	0.906273	-6.74343	825	919	900	847
ACADM	-0.0199797	6.22631	-0.330919	0.744363	0.904624	-7.04518	1834	2232	1963	1979
ACADS	-0.220297	3.86102	-2.022	0.0576308	0.303563	-4.54396	412	430	340	373
ACADSB	-0.0201575	4.78808	-0.219357	0.828734	0.939969	-6.70686	651	854	706	750
ACADVL	-0.0426568	7.12211	-0.928179	0.365071	0.687463	-6.86008	3555	4055	3624	3650
ACAP2	0.0672004	5.52435	1.03697	0.312895	0.642183	-6.37855	1137	1282	1270	1226
ACAP3	-0.268091	6.1889	-4.77482	0.000135104	0.00681367	0.691855	2014	2295	1819	1705
ACAT1	-0.0229181	6.54432	-0.453585	0.655316	0.863604	-7.07064	2471	2586	2485	2419
ACAT2	0.0438997	7.29268	0.972523	0.343129	0.66777	-6.8512	3906	4405	4388	4053
ACBD3	0.133248	6.16739	2.31656	0.0319703	0.222579	-4.62068	1749	1943	2096	1896
ACBD4	0.128119	2.77844	0.740303	0.468255	0.760317	-5.80796	201	155	198	180
ACBD5	0.0851602	4.77301	0.959795	0.349332	0.672807	-6.26054	708	719	818	678
ACBD6	0.0596662	6.25476	1.07693	0.295129	0.627976	-6.52057	1915	2107	2026	2105
ACBD7	-0.148499	1.43316	-0.60338	0.553461	0.810726	-5.48409	77	75	72	63
ACCS	-0.195786	4.6	-2.35757	0.0293849	0.212371	-4.15552	669	726	618	582
ACD	0.0786543	4.36992	0.815276	0.425116	0.729144	-6.26627	501	581	530	598
ACE	-0.10998	5.84791	-1.66191	0.113103	0.414002	-5.66072	0	0	0	0
ACE	-0.10998	5.84791	-1.66191	0.113103	0.414002	-5.66072	1637	1581	1515	1420
ACER2	0.138911	1.7796	0.640045	0.529862	0.795688	-5.56271	84	91	99	91
ACER3	-0.0189675	5.15861	-0.255178	0.801354	0.928176	-6.79763	894	1042	987	895
ACHE	-0.254354	2.88114	-1.61248	0.123505	0.432112	-4.89338	213	219	203	156
ACIN1	-0.0317815	7.88302	-0.670202	0.510872	0.785509	-7.20098	6082	6757	5910	6475
ACKR2	-0.442934	3.05277	-2.738	0.0131491	0.138323	-3.01074	286	237	209	168
ACLY	0.112229	8.6348	3.19105	0.00485398	0.0785896	-3.26016	9794	10772	11002	10894
ACN9	-0.0289194	5.13568	-0.403161	0.691375	0.88115	-6.74129	915	994	955	889
ACO1	0.149399	5.3399	1.95405	0.0657251	0.32267	-5.06739	915	1163	1154	1108
ACO2	0.104343	6.71268	1.94103	0.0673862	0.326582	-5.41754	2748	2691	2903	2854
ACOT13	-0.06403	5.10377	-0.826403	0.418933	0.727217	-6.46817	895	995	847	937
ACOT7	-0.0186935	5.97936	-0.315833	0.755606	0.909206	-6.9881	1582	1837	1677	1645
ACOT8	-0.132674	4.1732	-1.40027	0.177708	0.502966	-5.57925	485	530	461	451
ACOT9	-0.133306	4.10772	-1.27667	0.217252	0.546534	-5.7144	448	523	409	465
ACOX1	-0.0615982	5.56481	-0.903385	0.377743	0.696339	-6.51728	1188	1418	1273	1184
ACOX3	-0.0468898	4.0081	-0.459244	0.651321	0.861943	-6.37962	417	462	443	396
ACP1	-0.0155936	7.14892	-0.356887	0.725148	0.897032	-7.24042	3677	3996	3772	3706
ACP2	-0.0875538	5.24453	-1.2325	0.232943	0.562578	-6.09259	972	1132	997	952
ACP5	-0.298062	2.71015	-1.87865	0.0758775	0.34628	-4.44957	178	212	157	155
ACP6	0.174177	3.60662	1.47914	0.155651	0.478011	-5.3001	295	321	367	319
ACPL2	0.116884	0.166653	0.327915	0.746597	0.905515	-5.29169	27	30	32	29
ACRBP	-0.261215	0.374084	-0.762235	0.45537	0.749984	-5.1421	32	44	29	33
ACRC	0.0221175	2.92869	0.130634	0.897452	0.966376	-6.11933	168	243	232	178
ACRV1	-0.194995	0.151773	-0.528821	0.603113	0.836374	-5.21915	32	31	33	22
ACSBG1	0.417966	0.405627	1.19065	0.248596	0.579669	-4.81869	37	25	43	37
ACSF2	-0.428335	2.56434	-2.34947	0.0298799	0.21431	-3.62639	171	197	115	158
ACSF3	-0.00362629	5.9183	-0.0621909	0.951067	0.983765	-7.02246	1540	1717	1618	1582
ACSL1	0.0342826	3.42969	0.275362	0.78604	0.921598	-6.25902	272	300	309	269
ACSL3	0.00779592	7.46236	0.184637	0.85549	0.95214	-7.3484	4468	4995	4675	4695
ACSL4	-0.0410799	4.28341	-0.409253	0.686975	0.87814	-6.49022	494	569	560	461
ACSL6	-0.191081	1.52989	-0.696549	0.494602	0.776529	-5.45574	60	112	81	63
ACSM1	0.0377372	3.26339	0.262515	0.795778	0.925504	-6.20638	280	232	259	254
ACSM3	0.0184391	7.57796	0.440645	0.664491	0.868128	-7.28498	4901	5309	5282	4911
ACSS1	0.0483854	2.03042	0.243321	0.81039	0.932147	-5.80675	106	109	109	110
ACSS2	-0.0819506	5.264	-1.19284	0.24776	0.578542	-6.14386	1023	1102	1007	971
ACTB	-0.11907	11.1605	-3.55712	0.00212989	0.0475676	-2.6826	59537	68980	60424	56044
ACTBP8	0.0292312	2.89423	0.191744	0.849997	0.949514	-6.09792	197	198	217	181
ACTG1	-0.0249386	9.17491	-0.713168	0.484494	0.769389	-7.32928	14746	16636	15657	14719
ACTL6A	0.0345605	6.17275	0.63401	0.533708	0.798661	-6.88105	1852	1980	1953	1914
ACTL8	0.149077	4.06598	1.45056	0.163371	0.485214	-5.47988	423	431	447	487
ACTN1	-0.0498052	6.77682	-1.02628	0.317773	0.646596	-6.69261	2911	3086	2832	2877
ACTN2	0.200138	3.1905	1.26768	0.220379	0.550908	-5.43655	206	253	310	216
ACTN4	-0.0278801	8.82765	-0.70322	0.49053	0.773614	-7.29705	12206	12450	11727	12112
ACTR10	-0.104673	4.78361	-1.33035	0.199304	0.528841	-5.85238	723	813	720	687
ACTR1A	0.0368661	6.85867	0.7468	0.464416	0.756872	-6.95916	2851	3320	3119	3111
ACTR1B	-0.174414	5.41853	-2.56336	0.0191068	0.168735	-3.96357	1206	1236	1099	1033
ACTR2	0.0484889	8.60728	1.14135	0.268045	0.598924	-6.86612	9386	11301	10581	10439
ACTR3	0.00795571	8.00993	0.20225	0.841892	0.946438	-7.43047	6469	7370	6956	6742
ACTR3B	0.180702	4.76517	2.17717	0.0424107	0.259574	-4.53348	635	740	812	724
ACTR3C	-0.112523	2.24827	-0.543006	0.593501	0.831333	-5.76285	120	145	100	146
ACTR5	0.0982842	4.56038	1.16374	0.259076	0.589911	-5.98622	577	649	642	651
ACTR6	0.237073	5.22532	3.16464	0.00514862	0.0813283	-2.67755	839	1019	1119	1035
ACTR8	0.11985	5.21714	1.65875	0.113744	0.415028	-5.50998	903	1016	1001	1054
ACVR1	-0.1789	3.39396	-1.31609	0.203956	0.53351	-5.44268	301	300	297	229
ACVR1B	-0.0626403	5.46345	-0.923477	0.367452	0.689832	-6.47357	1180	1243	1116	1171
ACVR2A	0.191684	1.92402	0.923436	0.367472	0.689832	-5.4013	94	96	113	101
ACVR2B	0.0943778	5.64557	1.12267	0.275701	0.607515	-6.318	1123	1502	1306	1442
ACY1	0.0334597	2.18578	0.177937	0.860675	0.95341	-5.87054	113	128	121	122
ACYP1	-0.00484024	3.17695	-0.0356723	0.971919	0.990327	-6.21126	234	252	228	250
ACYP2	-0.29059	2.70707	-1.68623	0.108264	0.407322	-4.7382	214	176	153	158
AD000090.2	-0.0105647	5.46048	-0.153853	0.879364	0.961232	-6.89536	1116	1262	1226	1101
AD000092.3	-0.173389	-0.00595308	-0.445212	0.661247	0.866727	-5.22042	29	27	31	19
AD000684.2	0.396975	0.158203	0.966844	0.345887	0.670209	-4.96378	35	19	44	25
ADA	-0.264771	5.08614	-3.21806	0.00456976	0.0760167	-2.53086	1027	976	872	770
ADAL	0.0691227	5.24144	0.964462	0.347049	0.671189	-6.3798	984	1001	1064	988
ADAM10	0.0432128	6.42048	0.808589	0.428859	0.732042	-6.81269	2133	2408	2396	2214
ADAM11	0.180277	1.96288	0.885187	0.387229	0.706051	-5.44459	94	102	114	105
ADAM15	-0.201662	5.48722	-2.9777	0.00779285	0.103558	-3.13339	1254	1331	1077	1139
ADAM17	0.139044	5.70803	2.0224	0.0575857	0.303441	-5.04006	1224	1461	1543	1369
ADAM19	-0.230373	5.54757	-3.57253	0.00205684	0.0463842	-1.86164	1287	1438	1173	1115
ADAM1A	-0.0853376	3.40433	-0.607522	0.550768	0.808916	-6.10279	258	331	311	238
ADAM22	0.552542	1.56774	2.00875	0.0591354	0.305971	-3.99773	88	49	94	94
ADAM8	-0.774382	1.38722	-3.09333	0.00603405	0.089313	-2.17344	87	96	52	53
ADAM9	0.156072	5.78892	2.40627	0.0265677	0.201959	-4.35804	1278	1546	1569	1525
ADAMTS1	0.149591	4.33634	1.57823	0.131179	0.44363	-5.38517	509	521	539	588
ADAMTS10	-0.487491	2.69679	-3.00279	0.00737335	0.100279	-2.42347	202	210	158	132
ADAMTS13	-0.589651	1.72222	-2.0022	0.0598914	0.307756	-4.03178	116	102	110	45
ADAMTS14	-0.245727	4.33331	-2.66918	0.015248	0.150302	-3.47791	576	603	478	502
ADAMTS20	0.20345	2.59996	1.24031	0.230106	0.560692	-5.28657	142	161	168	176
ADAMTS3	-0.234306	5.83213	-3.72512	0.00145515	0.036627	-1.58707	1552	1774	1462	1324
ADAMTS5	0.959823	0.628836	2.73944	0.0131082	0.138039	-2.82261	32	27	74	43
ADAMTS6	-0.191994	2.27177	-1.00582	0.327265	0.654248	-5.43147	126	151	108	132
ADAMTS7	-0.0178957	0.545463	-0.0556084	0.95624	0.984718	-5.41888	39	39	41	35
ADAMTSL4	-0.351949	7.46808	-6.5836	2.79383e-06	0.000365543	4.38554	5338	5416	4484	3839
ADAMTSL5	-0.496505	3.29238	-3.66134	0.00168182	0.0407782	-1.17128	276	352	227	210
ADAR	0.0569566	8.57092	1.58299	0.130089	0.441597	-6.28808	9449	10617	10411	10142
ADARB1	-0.0357654	4.3791	-0.402129	0.692121	0.881697	-6.52345	548	584	559	529
ADAT1	0.0787694	5.28005	1.06557	0.300104	0.632737	-6.28813	1035	998	1077	1036
ADAT2	0.00588735	5.96533	0.102584	0.919378	0.97446	-7.03105	1617	1735	1678	1638
ADAT3	-0.0955458	3.53836	-0.794358	0.436893	0.738265	-6.01703	326	319	294	300
ADC	-0.188229	0.847585	-0.608443	0.55017	0.808626	-5.33222	44	59	37	53
ADCK1	-0.464048	3.98127	-4.25134	0.000440095	0.01632	-0.0225224	495	501	332	381
ADCK2	0.163493	4.08929	1.55634	0.136289	0.449351	-5.341	384	484	504	452
ADCK3	0.124205	5.70621	1.94152	0.0673233	0.326471	-5.17787	1337	1351	1482	1404
ADCK4	-0.0496162	4.43702	-0.567251	0.57725	0.823279	-6.45997	577	607	578	549
ADCK5	-0.200233	4.35604	-1.87575	0.0762941	0.347153	-4.93339	509	680	548	468
ADCY10	0.0414932	2.40079	0.237593	0.814765	0.933719	-5.92727	134	145	147	136
ADCY10P1	0.122928	1.91083	0.580588	0.568408	0.818699	-5.63654	91	102	115	93
ADCY3	0.0826411	4.80742	1.05034	0.306867	0.63797	-6.18083	721	741	768	757
ADCY6	-0.333926	3.58612	-2.86327	0.0100169	0.119453	-2.89189	347	377	277	289
ADCY7	-0.167527	5.38302	-2.20547	0.0400666	0.251441	-4.63564	1203	1174	998	1088
ADCY9	0.333349	4.25658	3.60573	0.00190781	0.0444696	-1.49265	436	479	578	558
ADD1	-0.153391	7.58376	-3.78555	0.00126848	0.0331934	-1.80504	5176	5707	4908	4731
ADD2	-0.110848	6.80495	-2.33052	0.0310673	0.218777	-4.73719	3038	3208	2864	2835
ADD3	-0.00693552	6.23937	-0.121648	0.904468	0.968878	-7.09774	1940	2132	1939	2056
ADH5	0.0248514	7.43873	0.586706	0.564376	0.816452	-7.18319	4516	4730	4661	4608
ADI1	-0.0280586	6.49001	-0.53606	0.598198	0.833894	-7.01599	2321	2560	2318	2399
ADIPOR1	0.0197787	7.15461	0.419396	0.679677	0.875493	-7.21637	3703	3905	3984	3622
ADIPOR2	0.0375892	6.8686	0.791131	0.438728	0.739315	-6.92664	3040	3160	3159	3111
ADIRF-AS1	-0.160173	-0.20072	-0.358808	0.723734	0.896763	-5.2101	31	19	15	30
ADK	0.0615447	5.75096	1.00617	0.3271	0.654248	-6.46671	1335	1501	1486	1429
ADM5	0.0142271	2.97504	0.0944464	0.925753	0.975927	-6.13901	204	216	234	186
ADNP	0.0916883	7.18894	2.03346	0.0563572	0.299964	-5.35612	3597	4008	4137	3848
ADNP2	-0.0342132	5.83525	-0.517434	0.610884	0.840443	-6.86421	1400	1717	1537	1455
ADO	0.185205	4.99227	2.37527	0.0283302	0.209441	-4.22604	732	876	887	912
ADORA2B	-0.257107	2.60413	-1.56431	0.13441	0.447141	-4.8817	164	193	145	149
ADPGK	0.140554	6.18646	2.51734	0.0210583	0.176412	-4.23876	1792	1938	2109	1944
ADPRH	-0.144021	2.23602	-0.745445	0.465215	0.757551	-5.6342	139	127	130	107
ADPRHL1	-0.179417	2.11283	-0.907839	0.375446	0.694605	-5.47043	129	118	106	108
ADPRHL2	0.0851889	5.12431	1.1833	0.251428	0.582461	-6.12006	860	961	945	958
ADPRM	0.151629	1.81122	0.704572	0.489707	0.772932	-5.53189	87	91	95	100
ADRA2C	-0.518536	0.94847	-1.77973	0.0912786	0.376993	-4.2349	54	70	47	38
ADRBK1	0.070951	6.93022	1.49248	0.152153	0.472526	-6.15928	3124	3273	3423	3200
ADRBK2	0.476899	3.23204	2.98128	0.0077317	0.103008	-2.56962	217	211	352	243
ADRM1	0.0253493	7.00406	0.56108	0.581365	0.825295	-7.11401	3286	3556	3505	3356
ADSL	0.00946389	7.26537	0.2165	0.830928	0.940656	-7.30528	3873	4380	4161	4019
ADSS	0.174249	6.44335	3.32199	0.00362013	0.0653745	-2.61587	2053	2357	2475	2424
ADSSL1	-0.130422	2.94383	-0.894695	0.382254	0.700541	-5.739	210	222	205	184
ADTRP	0.0827935	3.13877	0.596995	0.557627	0.812709	-6.02045	205	256	239	241
AEBP1	-0.0458408	4.54988	-0.541602	0.594449	0.831828	-6.50941	616	663	633	588
AEBP2	0.145145	4.47982	1.67464	0.110548	0.411094	-5.28638	559	581	638	604
AEN	0.0345	7.24644	0.710711	0.485981	0.770595	-7.06479	3826	4244	3932	4216
AES	-0.0887498	7.86705	-2.11292	0.0482039	0.277131	-5.33013	6312	6629	5886	6109
AF127936.3	0.0515432	4.96952	0.662134	0.515915	0.788971	-6.55686	787	868	899	793
AF127936.5	0.00342315	3.43578	0.0260871	0.979463	0.993285	-6.29929	276	304	261	315
AF129075.5	0.454217	0.0162492	1.20023	0.244944	0.57498	-4.75361	19	27	29	33
AF131216.5	-0.00821697	1.42697	-0.0336517	0.973509	0.990866	-5.64901	71	73	72	69
AF165138.7	0.160642	3.46837	1.33223	0.198698	0.528223	-5.44711	274	288	319	300
AF277315.13	0.0967204	1.51507	0.395721	0.696762	0.883632	-5.60245	68	80	89	68
AFAP1	0.33066	4.19135	3.21305	0.00462124	0.0764803	-2.3201	403	474	592	497
AFAP1-AS1	0.32067	0.847871	0.992134	0.333722	0.66016	-5.07298	56	33	53	52
AFF1	0.10779	7.25648	2.49231	0.0221972	0.18141	-4.5153	3829	4090	4212	4196
AFF4	0.173919	6.70515	3.11964	0.00569131	0.0863598	-3.11019	2544	2739	3153	2731
AFG3L1P	0.00928983	6.04158	0.165021	0.870688	0.958226	-7.04179	1682	1849	1781	1720
AFG3L2	0.056764	7.1662	1.29139	0.212209	0.542012	-6.47293	3580	3997	3939	3823
AFMID	-0.11822	5.0646	-1.5569	0.136157	0.449137	-5.62147	915	959	902	801
AFTPH	0.157615	4.76698	1.97028	0.0637049	0.318157	-4.89548	682	703	756	766
AGA	0.0655558	3.67912	0.544733	0.592336	0.831139	-6.23004	341	332	379	316
AGAP1	0.049462	5.45092	0.751851	0.461444	0.754867	-6.61493	1098	1214	1179	1178
AGAP3	-0.0381131	6.85365	-0.782866	0.443449	0.743325	-6.92996	3070	3229	2981	3065
AGAP4	-0.0725033	3.47235	-0.57321	0.573291	0.82103	-6.1457	271	343	302	272
AGAP6	-0.0673509	5.63511	-0.955843	0.351273	0.674534	-6.48636	1337	1398	1392	1186
AGAP8	-0.435572	-0.162266	-1.04614	0.308751	0.639441	-4.85495	26	29	28	14
AGAP9	0.228426	2.93207	1.46839	0.15852	0.480445	-5.10574	175	204	247	193
AGBL3	-0.0824365	1.49866	-0.329165	0.745667	0.905132	-5.61995	63	95	74	71
AGBL5	0.0781244	5.94717	1.23564	0.231799	0.561442	-6.26494	1559	1670	1795	1569
AGER	-0.263722	2.7079	-1.56758	0.133645	0.446472	-4.90604	201	184	175	141
AGFG1	-0.010467	7.21809	-0.22121	0.827312	0.939259	-7.29502	3766	4278	4124	3745
AGFG2	-0.181138	3.58127	-1.55287	0.137113	0.449903	-5.1903	319	366	295	300
AGGF1	0.110762	5.82085	1.8463	0.0806427	0.357579	-5.36425	1421	1503	1589	1522
AGK	0.153793	5.40522	1.93645	0.0679806	0.327998	-5.11285	1066	1094	1307	1070
AGL	0.120195	5.94073	2.07103	0.0523585	0.289422	-5.01277	1501	1668	1732	1661
AGO1	0.0900286	7.18287	1.99459	0.0607819	0.310297	-5.42243	3724	3846	3990	3949
AGO2	0.111429	5.84855	1.65973	0.113546	0.41474	-5.6644	1529	1453	1584	1585
AGO3	-0.0310326	5.5022	-0.471073	0.643005	0.85864	-6.80316	1208	1254	1184	1190
AGO4	0.166783	4.17404	1.74065	0.0980755	0.389055	-5.09393	449	466	502	510
AGPAT1	-0.0664423	6.45195	-1.25657	0.224289	0.554583	-6.36276	2323	2494	2366	2169
AGPAT2	0.0256831	5.53314	0.383071	0.705961	0.887909	-6.84983	1209	1258	1298	1178
AGPAT3	-0.104329	7.45127	-2.51995	0.0209429	0.176199	-4.49602	4644	5116	4507	4436
AGPAT4	-0.0106096	5.62777	-0.158699	0.875597	0.959973	-6.93693	1342	1326	1340	1268
AGPAT5	0.0733219	6.84186	1.37816	0.184323	0.509725	-6.29563	2735	3296	3221	3019
AGPAT6	0.0197984	6.3657	0.361166	0.721999	0.895654	-7.06797	2150	2253	2301	2100
AGPAT9	0.338018	1.98312	1.52481	0.143941	0.459557	-4.76879	110	81	125	109
AGPS	0.144719	6.77241	2.79253	0.0116848	0.129438	-3.81401	2557	3047	3076	3017
AGRN	-0.296651	7.39299	-6.80897	1.77302e-06	0.000253505	4.85937	4779	5239	3960	4076
AGTPBP1	0.0143673	4.30328	0.15236	0.880525	0.961607	-6.57079	515	540	505	546
AGTRAP	-0.104255	5.55059	-1.62911	0.11992	0.426564	-5.63598	1265	1347	1215	1179
AHCTF1	0.186175	7.88945	4.46361	0.000272129	0.0115418	-0.315334	5578	6392	6941	6469
AHCTF1P1	0.0300324	4.26899	0.311883	0.758559	0.910533	-6.52171	476	550	495	538
AHCY	0.0515366	8.74646	1.49204	0.152267	0.47253	-6.43918	10861	11829	11801	11367
AHCYL1	0.0572889	6.90635	1.21962	0.237679	0.567752	-6.50717	3017	3307	3215	3268
AHCYL2	0.22087	3.9169	1.97302	0.0633689	0.31708	-4.64318	334	421	463	403
AHDC1	-0.301942	4.34665	-3.36177	0.00331037	0.0622399	-2.04156	582	632	495	475
AHI1	0.168485	5.00588	2.18938	0.0413847	0.255549	-4.57393	792	837	956	850
AHNAK	-0.335199	6.08385	-5.08447	6.78059e-05	0.00427455	1.40442	1934	2163	1501	1706
AHR	0.180903	1.5521	0.74281	0.466771	0.758927	-5.43194	61	88	80	85
AHRR	0.0126384	2.6073	0.073754	0.941985	0.981104	-6.01887	160	165	146	179
AHSA1	-0.0189239	6.88212	-0.398559	0.694705	0.882722	-7.16913	3083	3300	3073	3135
AHSA2	-0.0838833	6.27462	-1.47537	0.156652	0.479103	-6.03662	2093	2192	2098	1889
AIDA	-0.0655944	6.03783	-0.930602	0.363848	0.686675	-6.61241	1670	1951	1873	1545
AIF1L	0.0531368	4.64577	0.595384	0.558681	0.813532	-6.50776	647	674	736	618
AIFM1	-0.0438393	6.26843	-0.796079	0.435917	0.737404	-6.78638	2040	2168	2096	1928
AIFM2	-0.103476	4.53817	-1.17364	0.255184	0.586145	-5.96801	590	707	586	602
AIG1	1.06825	0.167463	2.72525	0.0135158	0.140203	-2.89922	26	16	36	50
AIM1	0.217656	3.8512	1.98723	0.0616533	0.312069	-4.60037	360	359	436	388
AIMP1	0.0364207	6.09895	0.591514	0.561217	0.814772	-6.88931	1731	1910	1970	1715
AIMP2	0.021839	5.77708	0.347112	0.73236	0.900865	-6.92546	1351	1580	1504	1425
AIP	-0.0530019	5.00566	-0.687984	0.499858	0.778998	-6.54851	872	886	815	855
AJUBA	0.0809491	2.45674	0.436293	0.66759	0.869634	-5.87952	151	136	170	130
AK1	-0.205112	1.63063	-0.829445	0.417253	0.726642	-5.39163	102	78	84	68
AK2	0.0473627	8.62681	1.24427	0.228681	0.55946	-6.74862	10114	10792	10453	10840
AK3	-0.00339655	4.69676	-0.0364599	0.9713	0.990232	-6.70447	612	792	732	644
AK4	0.125122	5.50252	1.81265	0.0858754	0.368183	-5.34008	1062	1278	1288	1222
AK4P1	-0.0185864	2.15356	-0.0963757	0.924241	0.975685	-5.87082	114	126	127	107
AK9	0.0778772	2.26781	0.417569	0.680989	0.87602	-5.82744	113	139	140	122
AKAP1	0.137858	6.24378	2.5202	0.0209316	0.176199	-4.24659	1862	2023	2185	2028
AKAP10	-0.0202841	4.31328	-0.199769	0.843805	0.947325	-6.56539	467	616	522	525
AKAP11	0.108622	6.67803	2.20381	0.0402007	0.251691	-4.94636	2495	2811	2818	2816
AKAP12	0.0415289	6.69977	0.854928	0.403347	0.71815	-6.83711	2633	2877	2785	2802
AKAP13	0.135198	6.02346	2.15688	0.0441677	0.265029	-4.88014	1528	1816	1763	1852
AKAP17A	-0.0806618	5.88498	-1.21452	0.239573	0.569218	-6.27407	1573	1693	1441	1608
AKAP5	-0.395507	0.752977	-1.30695	0.206981	0.536994	-4.76249	49	54	41	36
AKAP6	0.423356	1.50301	1.73347	0.0993712	0.390751	-4.38387	69	62	93	80
AKAP7	0.213119	1.77961	0.937329	0.360467	0.683901	-5.3477	78	93	113	84
AKAP8	-0.0037976	6.2513	-0.0701943	0.94478	0.981804	-7.1058	1997	2103	2017	2012
AKAP8L	-0.0590381	6.50097	-1.17518	0.254582	0.585249	-6.47024	2380	2591	2388	2313
AKAP9	0.126394	6.61745	2.31676	0.0319569	0.222579	-4.72329	2365	2694	2880	2564
AKIP1	0.126023	4.73088	1.4296	0.169228	0.493183	-5.70862	636	731	690	783
AKIRIN1	-0.115365	7.06859	-2.4336	0.0250989	0.195341	-4.59345	3597	3915	3338	3497
AKIRIN2	-0.0607744	6.03935	-1.07354	0.296607	0.62996	-6.47075	1737	1874	1704	1707
AKNA	-0.0683074	1.67168	-0.288867	0.775842	0.917397	-5.68257	92	83	94	71
AKR1A1	-0.103742	5.77598	-1.49246	0.15216	0.472526	-5.88896	1390	1671	1344	1461
AKR1C1	0.0365115	6.27887	0.667571	0.512513	0.786699	-6.88469	1948	2176	2056	2111
AKR1C2	-0.0624402	4.70561	-0.77921	0.445547	0.743702	-6.39751	686	747	676	676
AKR1C3	0.0266142	4.90447	0.312991	0.75773	0.910141	-6.71365	707	896	839	765
AKR1E2	-0.104139	2.45249	-0.558632	0.583001	0.825955	-5.81864	159	146	161	120
AKR7A2	0.0815209	5.51111	1.26336	0.221892	0.551936	-6.12176	1133	1251	1260	1225
AKR7A2P1	-1.51179	-0.419371	-3.80227	0.0012212	0.0323222	-1.42299	31	36	14	9
AKR7A3	-0.65273	0.411196	-1.86327	0.0781112	0.351615	-4.07649	52	38	28	27
AKR7L	0.0372196	0.136051	0.097473	0.923382	0.975685	-5.32501	36	23	32	26
AKT1	-0.133081	6.59243	-2.27805	0.0345879	0.233204	-4.7902	2522	2918	2329	2561
AKT1S1	-0.0216039	6.65859	-0.417831	0.680801	0.87602	-7.11256	2573	2905	2782	2536
AKT2	-0.0190801	7.26864	-0.422127	0.677717	0.874745	-7.23745	4108	4235	4037	4076
AKT3	-0.239701	0.330359	-0.65844	0.518233	0.790006	-5.19292	29	45	38	24
AKTIP	0.225638	2.48311	1.30033	0.209193	0.539082	-5.18324	124	154	155	165
AL021068.1	0.803851	1.07575	2.84329	0.0104632	0.121581	-2.62133	35	51	76	71
AL031320.1	0.0712459	2.20673	0.367273	0.717514	0.893975	-5.82719	118	123	113	138
AL049840.1	-0.389528	0.138616	-0.976486	0.341213	0.666771	-4.95289	45	25	28	22
AL109763.2	-0.10763	3.97208	-1.05948	0.302793	0.63474	-5.91516	425	450	410	390
AL117190.3	-0.568572	0.0713947	-1.53473	0.141496	0.455292	-4.43448	31	37	25	20
AL118506.1	0.113805	0.174732	0.302752	0.765401	0.912991	-5.29983	36	23	32	29
AL132709.5	-0.583293	2.18407	-3.03671	0.0068408	0.0961247	-2.29158	144	154	93	103
AL132709.8	-0.519924	0.580593	-1.59157	0.128144	0.439256	-4.42381	53	43	33	32
AL133493.2	0.452509	3.09341	2.8399	0.0105409	0.122234	-2.82139	212	181	237	293
AL136419.6	0.306569	0.279664	0.787929	0.440553	0.740341	-5.10791	25	33	25	50
AL161915.1	0.220092	0.759766	0.724054	0.47794	0.765422	-5.24658	36	48	48	48
AL353898.3	0.149934	0.0962748	0.406183	0.689191	0.879579	-5.25408	23	31	27	32
AL354822.1	-0.0414817	3.69975	-0.366615	0.717997	0.894025	-6.31884	356	352	340	337
AL356585.1	-0.133216	3.69097	-1.162	0.259765	0.590506	-5.71705	355	371	312	341
AL356585.2	0.0591136	0.521134	0.177175	0.861265	0.953835	-5.40122	41	34	34	43
AL356585.3	0.299613	2.03819	1.48634	0.153756	0.475111	-4.83252	88	111	126	115
AL357673.1	0.165025	3.53797	1.386	0.181958	0.507455	-5.40133	289	300	342	309
AL589743.1	0.116665	5.71573	1.82446	0.0840058	0.364369	-5.37354	1285	1430	1524	1378
AL590431.1	0.626032	1.12315	2.25272	0.0364167	0.240163	-3.57456	52	42	72	70
AL591025.1	0.179149	0.798087	0.598057	0.556934	0.812709	-5.32624	45	42	51	46
AL592183.1	0.132688	5.18019	1.8244	0.0840151	0.364369	-5.24268	918	943	1048	963
AL592188.7	-1.23244	1.90365	-2.73623	0.0131993	0.13849	-2.81651	267	90	42	96
AL592284.1	-0.0984385	1.16781	-0.371014	0.714772	0.892345	-5.51487	61	63	58	56
AL627309.1	-0.0443266	5.89407	-0.674096	0.508449	0.783606	-6.78362	1580	1667	1672	1437
AL645728.1	-0.0947891	1.15326	-0.337532	0.739453	0.903486	-5.52166	66	57	49	65
AL672183.2	0.16145	2.73995	1.00556	0.327387	0.654248	-5.57405	161	178	206	169
AL773604.8	-0.20084	1.42304	-0.776684	0.447001	0.744773	-5.3735	71	83	80	54
AL807752.1	0.985049	-0.290329	2.39343	0.0272851	0.205112	-3.3955	19	12	29	31
ALAD	-0.0674021	5.26057	-0.978049	0.34046	0.666173	-6.37134	1019	1090	995	988
ALAS1	-0.118347	5.20011	-1.66237	0.11301	0.414002	-5.50021	1009	1049	927	941
ALAS2	-0.0853464	7.1307	-1.88743	0.0746289	0.344244	-5.5936	3808	3951	3652	3554
ALDH16A1	-0.0485278	6.1541	-0.877368	0.391353	0.710211	-6.68975	1847	2048	1849	1861
ALDH18A1	0.175524	6.61402	3.5734	0.0020528	0.0463684	-2.09825	2383	2573	2814	2701
ALDH1A2	0.124528	4.19104	1.23925	0.230491	0.560759	-5.78538	417	527	506	505
ALDH1B1	-0.00654515	6.23744	-0.119092	0.906465	0.96961	-7.09759	1907	2162	1986	2003
ALDH1L2	-0.26748	0.602497	-0.777292	0.446651	0.744773	-5.17891	34	57	30	44
ALDH2	-0.0391816	4.93245	-0.512313	0.614394	0.842582	-6.63652	771	895	804	792
ALDH3A2	-0.0209756	4.03179	-0.208168	0.837335	0.944169	-6.47299	411	475	426	434
ALDH4A1	-0.0331396	3.87186	-0.3012	0.766565	0.91324	-6.39711	404	392	405	361
ALDH5A1	-0.0235514	5.87959	-0.371767	0.714221	0.891938	-6.94254	1581	1610	1628	1467
ALDH6A1	0.0777218	3.73239	0.680216	0.504653	0.780548	-6.16396	326	369	343	381
ALDH9A1	0.130823	6.29537	2.33446	0.0308171	0.21768	-4.61719	1946	2090	2292	2066
ALDOA	-0.0594572	10.3187	-1.96762	0.0640313	0.318869	-5.85124	33110	37050	33449	32842
ALDOC	0.00868555	4.2242	0.0926707	0.927145	0.976323	-6.553	490	511	507	485
ALG1	-0.0411145	5.1922	-0.58563	0.565084	0.816624	-6.66309	946	1048	956	953
ALG10	0.2304	3.37407	1.773	0.092419	0.379415	-4.80371	249	265	325	271
ALG10B	0.274739	3.50644	2.24991	0.0366251	0.240574	-4.04471	281	274	345	316
ALG11	0.197593	3.48248	1.56564	0.134099	0.446825	-5.14231	270	290	295	340
ALG12	0.057267	3.46231	0.471256	0.642876	0.85864	-6.19606	278	302	290	305
ALG13	0.0437096	5.16686	0.587447	0.563888	0.816166	-6.65556	865	1042	971	962
ALG14	-0.259332	2.85848	-1.28291	0.215104	0.544546	-5.31396	202	223	131	235
ALG1L13P	0.274024	1.62337	1.16885	0.25706	0.587645	-5.08924	64	87	93	86
ALG1L6P	0.190803	1.80573	0.885905	0.386852	0.705676	-5.39781	85	90	103	94
ALG1L9P	0.493405	0.0539853	1.25528	0.224745	0.555068	-4.7093	28	19	27	38
ALG2	0.119121	5.30217	1.60287	0.12562	0.435884	-5.61391	913	1130	1108	1072
ALG3	-0.108897	6.0204	-1.89049	0.0741966	0.343125	-5.3411	1700	1927	1659	1653
ALG5	0.0347364	4.80631	0.388124	0.702281	0.886335	-6.65917	646	850	760	742
ALG6	0.0325819	4.03336	0.318261	0.753793	0.908583	-6.44379	438	432	454	422
ALG8	0.0203581	6.3485	0.34124	0.736705	0.90234	-7.07114	2106	2245	2339	2018
ALG9	0.0965665	3.43866	0.700347	0.492281	0.774966	-6.05389	241	327	328	269
ALG9	0.0965665	3.43866	0.700347	0.492281	0.774966	-6.05389	0	0	0	0
ALKBH1	0.00107341	4.02286	0.0101189	0.992033	0.996993	-6.49235	393	483	458	405
ALKBH2	0.0749955	4.80899	0.919288	0.369582	0.690706	-6.30865	742	726	760	762
ALKBH3	-0.0275411	4.91955	-0.310004	0.759966	0.911053	-6.71875	809	832	729	864
ALKBH4	0.203193	4.34019	2.18507	0.0417444	0.257198	-4.39909	506	508	563	587
ALKBH5	0.0605536	6.07695	1.04465	0.309424	0.639441	-6.51044	1722	1832	1909	1745
ALKBH6	-0.247049	2.11041	-1.15906	0.260934	0.591515	-5.23202	130	122	88	124
ALKBH7	-0.115182	4.84154	-1.43903	0.166573	0.489137	-5.72664	741	865	716	744
ALKBH8	0.0598108	4.57542	0.696339	0.49473	0.776529	-6.42016	610	645	681	609
ALMS1	0.20238	5.51483	2.714	0.0138477	0.141946	-3.68479	1155	1137	1398	1204
ALMS1-IT1	0.186636	1.66508	0.806794	0.429867	0.73268	-5.41856	69	91	96	83
ALOX12	-0.209461	1.75953	-0.957034	0.350687	0.674014	-5.32491	91	104	86	80
ALOX12P2	-0.144143	0.447508	-0.421737	0.677997	0.874792	-5.3228	37	39	28	41
ALOX5	-0.137655	2.41208	-0.727212	0.476049	0.764526	-5.70159	134	166	117	154
ALPK1	0.134036	2.33775	0.746481	0.464603	0.757	-5.66548	119	140	146	134
ALS2	0.0134793	5.50859	0.193378	0.848735	0.948977	-6.90037	1221	1215	1269	1154
ALS2CR12	0.0688415	0.141534	0.186455	0.854084	0.951308	-5.31592	27	30	36	24
ALX4	0.0826913	0.433933	0.210122	0.835832	0.943709	-5.37587	25	48	53	25
ALYREF	-0.0617745	7.54296	-1.34077	0.19596	0.524159	-6.47985	4821	5431	4691	4987
AMACR	0.592035	0.154836	1.61703	0.122517	0.430355	-4.35207	21	27	32	40
AMBRA1	0.040355	6.00487	0.70721	0.488104	0.771806	-6.78872	1652	1752	1754	1695
AMD1	0.184753	8.00528	4.43484	0.000290413	0.0120953	-0.395849	6135	6833	7610	6919
AMDHD2	-0.222631	4.53851	-2.54447	0.0198863	0.172177	-3.78037	677	672	567	571
AMER1	0.10061	3.66801	0.857794	0.401802	0.717057	-6.00782	314	345	328	370
AMFR	-0.0512187	6.7961	-1.03444	0.314046	0.643545	-6.68847	2882	3204	3022	2767
AMH	-0.0290458	5.31682	-0.370038	0.715487	0.892528	-6.80045	1026	1140	1151	948
AMHR2	-0.799218	3.44556	-6.37055	4.32124e-06	0.000520005	4.40092	377	395	231	206
AMIGO1	0.299082	2.90181	1.80375	0.0873082	0.371206	-4.61802	205	160	212	225
AMIGO2	0.143104	5.5663	2.07931	0.0515128	0.28692	-4.90609	1214	1210	1383	1255
AMMECR1	0.108977	6.32637	2.07695	0.0517527	0.287412	-5.09567	1992	2163	2252	2163
AMMECR1L	-0.00602734	5.59808	-0.0922007	0.927513	0.976424	-6.93808	1236	1375	1343	1220
AMN1	0.0584851	1.35594	0.225222	0.824235	0.938165	-5.60596	75	60	68	69
AMOTL1	-0.027071	7.91988	-0.657728	0.51868	0.7902	-7.21477	6505	6634	6407	6300
AMPD2	-0.00763807	6.37479	-0.137357	0.892208	0.965647	-7.12832	2239	2234	2229	2153
AMPD3	-0.469996	4.3965	-5.09918	6.56358e-05	0.0041757	1.75086	619	715	502	447
AMT	0.305651	0.318576	0.795671	0.436148	0.737495	-5.11058	37	24	48	27
AMZ2	0.173639	5.35281	2.47271	0.0231288	0.185391	-4.12565	1036	1032	1152	1145
AMZ2P1	-0.221831	2.48494	-1.27684	0.217195	0.546534	-5.2108	162	162	129	145
ANAPC1	0.14833	7.70115	3.12156	0.00566711	0.0862619	-3.29009	4926	5723	6149	5479
ANAPC10	0.0202481	4.0618	0.201122	0.842762	0.946939	-6.48422	421	470	431	460
ANAPC11	0.00143017	6.24732	0.0229237	0.981953	0.994004	-7.10714	1912	2173	1911	2123
ANAPC13	0.03904	5.84851	0.654728	0.520568	0.790773	-6.78516	1477	1579	1590	1504
ANAPC15	0.0750495	3.19975	0.543841	0.592938	0.831165	-6.07112	215	267	239	261
ANAPC16	-0.0345811	6.31935	-0.610412	0.548892	0.807879	-6.93175	2016	2335	2049	2134
ANAPC2	-0.0967686	6.45041	-1.85724	0.0790018	0.353444	-5.4988	2358	2504	2317	2164
ANAPC4	-0.0747914	6.17076	-1.23666	0.231431	0.561103	-6.31956	1850	2131	1977	1749
ANAPC5	0.0103807	8.10196	0.231626	0.819329	0.93536	-7.43623	7179	7539	7774	6859
ANAPC7	0.0602159	7.1687	1.31962	0.202797	0.532183	-6.43801	3618	3961	4057	3732
ANGEL1	0.168251	5.12004	2.34827	0.0299538	0.214692	-4.30837	858	905	995	957
ANGEL2	-0.111978	5.53548	-1.73759	0.0986252	0.389812	-5.46691	1243	1349	1178	1185
ANGPT1	-0.023792	4.85335	-0.303167	0.765089	0.912698	-6.70258	730	838	750	769
ANGPTL4	-0.763693	0.830008	-2.51836	0.0210132	0.176199	-3.15524	56	68	41	31
ANK1	0.0467764	8.81922	1.32727	0.200303	0.529695	-6.66816	11665	12226	12359	11963
ANK3	0.0583038	4.29617	0.540798	0.594992	0.832185	-6.43053	560	479	520	539
ANKAR	-0.0950341	1.18077	-0.349988	0.730235	0.899754	-5.52516	54	72	64	52
ANKDD1A	0.193564	3.13078	1.22266	0.236554	0.566823	-5.46995	211	229	297	206
ANKEF1	-0.116042	3.3163	-0.864895	0.397991	0.714621	-5.8865	243	317	252	255
ANKFY1	0.066614	6.39335	1.19335	0.247563	0.578364	-6.42426	2207	2209	2352	2204
ANKH	0.184268	5.05883	2.32806	0.0312245	0.219156	-4.33137	795	887	1017	870
ANKHD1	-0.154025	2.42885	-0.866865	0.396938	0.713904	-5.60086	134	172	133	137
ANKHD1-EIF4EBP3	-0.290453	0.317758	-0.774616	0.448193	0.745464	-5.12333	31	43	41	21
ANKIB1	0.143999	5.52261	2.08005	0.0514379	0.286776	-4.89417	1066	1292	1313	1249
ANKLE1	0.0249389	4.24789	0.25744	0.799634	0.927191	-6.53091	476	537	545	472
ANKLE2	-0.0293573	7.08651	-0.656859	0.519226	0.790466	-7.07087	3491	3896	3627	3502
ANKMY1	-0.0519253	4.84337	-0.644911	0.526772	0.794454	-6.53358	785	786	779	714
ANKMY2	0.0553744	5.66302	0.849533	0.406266	0.719481	-6.58945	1242	1434	1429	1310
ANKRA2	0.191882	3.60058	1.5727	0.132455	0.44512	-5.16873	288	322	378	311
ANKRD10	-0.093339	5.73979	-1.46116	0.160472	0.482224	-5.9231	1408	1561	1446	1298
ANKRD10-IT1	-0.0186426	2.24283	-0.0956993	0.924771	0.975685	-5.89993	107	151	121	128
ANKRD11	0.0283206	8.0253	0.730755	0.473932	0.763369	-7.17767	6758	7110	6985	6952
ANKRD12	0.13516	5.31236	1.98575	0.061831	0.312416	-5.00701	967	1072	1127	1079
ANKRD13A	0.0350823	5.99659	0.597496	0.5573	0.812709	-6.85974	1585	1810	1768	1658
ANKRD13B	0.0551944	4.11392	0.526513	0.604684	0.837136	-6.38006	468	445	447	487
ANKRD13C	0.13622	4.80401	1.47711	0.156189	0.478796	-5.66474	624	818	828	728
ANKRD13D	-0.182097	4.9145	-2.39172	0.0273818	0.205643	-4.17498	811	917	769	731
ANKRD16	0.00075583	3.59495	0.00648281	0.994896	0.998085	-6.3529	304	345	312	328
ANKRD17	0.112724	8.01274	2.9401	0.00846504	0.108605	-3.72172	6469	6884	7135	7092
ANKRD18B	0.367306	3.06294	2.57714	0.0185565	0.166468	-3.32332	178	218	264	239
ANKRD18DP	-0.159991	1.35825	-0.611897	0.54793	0.807485	-5.45907	59	88	62	66
ANKRD18EP	-0.00760458	3.13666	-0.0543375	0.957239	0.984718	-6.19675	246	228	235	228
ANKRD19P	-0.926625	0.0613287	-2.29707	0.0332716	0.22819	-3.50639	49	30	21	18
ANKRD20A11P	-0.00488114	2.25972	-0.0256303	0.979822	0.993287	-5.90955	131	126	116	137
ANKRD20A14P	-0.092262	4.42206	-1.04452	0.30948	0.639441	-6.07161	578	611	543	556
ANKRD20A2	0.731192	0.228115	2.0065	0.0593946	0.306577	-3.88588	25	23	47	33
ANKRD20A3	0.193042	0.8102	0.633378	0.534111	0.798777	-5.31036	37	51	45	54
ANKRD20A5P	0.0119366	3.66639	0.104039	0.91824	0.974404	-6.37097	341	338	333	341
ANKRD20A9P	0.210462	2.20643	1.06624	0.299808	0.632577	-5.35485	116	114	150	114
ANKRD26	0.154428	5.25416	2.2214	0.0388	0.248007	-4.57608	943	1001	1061	1071
ANKRD27	-0.10421	5.61421	-1.64179	0.117243	0.422155	-5.63279	1284	1448	1257	1246
ANKRD28	0.088634	6.42323	1.70726	0.104223	0.400277	-5.73197	2119	2358	2410	2280
ANKRD32	-0.0219445	4.2478	-0.22981	0.82072	0.93606	-6.53771	468	563	502	497
ANKRD33B	-0.118505	1.62559	-0.490591	0.629389	0.852007	-5.59537	95	78	72	84
ANKRD34A	-0.347622	1.86926	-1.6082	0.124444	0.433757	-4.63075	96	126	84	87
ANKRD36	-0.113045	3.30685	-0.699925	0.492539	0.775005	-6.00996	327	235	253	248
ANKRD36B	-0.21137	2.70345	-1.21491	0.239427	0.569218	-5.34557	155	226	155	166
ANKRD36C	0.0474216	2.77792	0.304786	0.763875	0.912521	-6.03132	184	178	183	185
ANKRD37	-0.350383	1.68059	-1.48846	0.153201	0.473744	-4.74069	107	88	76	73
ANKRD39	-0.0376872	3.4751	-0.288182	0.776358	0.917601	-6.27046	322	285	306	274
ANKRD40	0.0876603	5.85419	1.42396	0.170832	0.494845	-6.0025	1414	1606	1649	1513
ANKRD42	0.173065	4.66472	2.03186	0.0565341	0.300066	-4.76191	602	683	760	669
ANKRD46	0.191672	4.66514	2.25536	0.0362219	0.239448	-4.36399	617	659	766	672
ANKRD49	0.017554	4.33009	0.194597	0.847794	0.948422	-6.57178	522	552	545	526
ANKRD50	-0.0368541	5.14107	-0.505611	0.619002	0.845642	-6.69474	896	1027	911	935
ANKRD52	0.132755	7.37164	2.93589	0.00854374	0.109008	-3.63143	4205	4296	4561	4623
ANKRD54	0.150382	5.17245	2.01949	0.057913	0.304356	-4.91523	922	918	1048	964
ANKRD55	0.351467	1.39225	1.41053	0.174703	0.49886	-4.77115	63	61	76	80
ANKRD6	0.16283	3.79065	1.44035	0.166203	0.488801	-5.40887	344	358	366	410
ANKRD61	-0.122134	2.24949	-0.65159	0.522546	0.79239	-5.70104	118	149	125	116
ANKRD9	-0.373928	3.32851	-2.70385	0.0141536	0.144018	-3.14344	264	355	245	223
ANKS1A	0.0401794	5.65294	0.642579	0.528251	0.794956	-6.74331	1259	1410	1364	1339
ANKS3	-0.0385945	4.76523	-0.424444	0.676056	0.874077	-6.6322	772	711	683	737
ANKS6	-0.0157912	6.27735	-0.289727	0.775194	0.916866	-7.07084	2038	2154	2021	2065
ANKZF1	-0.0425856	5.66389	-0.669003	0.51162	0.786223	-6.72836	1309	1458	1302	1345
ANLN	0.0574345	6.88762	1.19593	0.246581	0.577295	-6.53108	2922	3326	3298	3105
ANO10	0.0431052	5.25916	0.564074	0.579367	0.824512	-6.6927	1033	996	1082	977
ANO3	0.437781	0.712655	1.36884	0.187174	0.513783	-4.69139	34	41	61	41
ANO5	0.22344	4.04081	2.0857	0.0508682	0.284874	-4.4873	358	465	471	472
ANO6	0.14474	5.31061	2.131	0.0465053	0.272144	-4.75292	972	1057	1110	1100
ANO7	0.172951	1.86755	0.774007	0.448544	0.745464	-5.50114	89	95	121	86
ANO8	-0.290132	4.2233	-2.84312	0.0104671	0.121581	-3.09741	575	536	437	456
ANO9	-0.870863	-0.00597778	-2.10711	0.0487619	0.278533	-3.7569	28	45	14	26
ANP32A	0.00571039	7.91149	0.143081	0.887747	0.964145	-7.42733	6125	6802	6334	6449
ANP32B	-0.023638	9.12744	-0.656494	0.519456	0.790556	-7.36385	14179	16181	14601	14795
ANP32E	0.0951086	7.66943	2.21666	0.0391735	0.249219	-5.11187	4900	5711	5639	5512
ANPEP	-0.460471	2.00458	-2.16219	0.0437017	0.263866	-3.83199	112	141	80	102
ANTXR1	0.012866	4.13412	0.129401	0.898414	0.966799	-6.51979	471	468	457	476
ANTXR2	0.144431	5.99742	2.49446	0.0220969	0.180804	-4.2382	1590	1676	1770	1787
ANXA1	-0.0460451	7.00218	-1.01852	0.32135	0.64949	-6.74795	3345	3660	3354	3330
ANXA11	-0.150004	7.08915	-3.38758	0.00312353	0.060167	-2.60402	3690	4023	3449	3399
ANXA2	-0.162421	6.97044	-3.49778	0.00243585	0.0517347	-2.33771	3399	3737	3248	3035
ANXA2P2	-0.0581373	2.87266	-0.385777	0.70399	0.886636	-6.03469	182	220	198	182
ANXA2R	-0.290036	2.68007	-1.81194	0.0859889	0.368421	-4.54441	188	192	150	156
ANXA3	0.877062	-0.129798	2.08938	0.0505008	0.283709	-3.78164	24	13	37	28
ANXA4	-0.128226	0.965084	-0.414985	0.682847	0.876483	-5.44711	43	68	41	59
ANXA5	-0.0366534	6.39393	-0.688529	0.499523	0.778822	-6.89767	2156	2426	2177	2223
ANXA6	-0.221873	6.14785	-3.97128	0.000831569	0.0251462	-1.10732	2018	2098	1768	1709
ANXA7	0.00127464	7.26395	0.0291652	0.97704	0.992268	-7.32911	3884	4384	4155	3994
ANXA9	0.0827251	2.31552	0.448448	0.658952	0.866229	-5.82974	129	130	126	145
AOC2	0.276379	1.41154	1.12043	0.276632	0.608406	-5.08486	65	64	76	78
AOC3	0.262451	-0.108562	0.588219	0.563381	0.815949	-5.14359	17	29	41	17
AP000254.8	-0.559364	0.35954	-1.59541	0.127281	0.438137	-4.39503	37	46	23	33
AP000347.2	0.187182	1.4749	0.702145	0.491185	0.774044	-5.43726	58	83	97	63
AP000350.4	0.273661	1.10183	0.923471	0.367455	0.689832	-5.18434	40	67	73	53
AP000350.5	0.0500602	1.94008	0.231918	0.819106	0.935314	-5.78024	110	93	112	94
AP000351.10	-0.106637	0.926484	-0.363375	0.720376	0.894483	-5.45512	50	55	42	55
AP000442.1	0.191537	0.630753	0.579301	0.569258	0.819498	-5.29743	38	39	55	34
AP000472.2	0.307819	0.256339	0.867345	0.396681	0.713826	-5.05183	25	32	31	39
AP000487.5	0.0709597	1.08238	0.252841	0.803133	0.928606	-5.52553	54	56	50	65
AP000525.10	0.223596	1.22381	0.762026	0.455492	0.750085	-5.33218	51	65	88	50
AP000525.9	0.24568	4.5872	2.79792	0.0115489	0.128636	-3.28851	551	637	739	650
AP000705.7	-0.270081	0.667011	-0.737945	0.469653	0.761381	-5.21713	47	46	59	24
AP001053.11	-0.0311388	0.926585	-0.0958632	0.924643	0.975685	-5.50946	60	44	65	37
AP001062.7	-0.100953	1.51816	-0.397836	0.695229	0.882817	-5.60241	68	92	87	61
AP001065.15	0.0149688	3.27371	0.10792	0.915202	0.972983	-6.23885	237	280	235	282
AP001171.1	-0.188101	2.29131	-1.03831	0.312287	0.642106	-5.40668	134	146	122	120
AP001205.1	-0.481478	0.49891	-1.45543	0.162034	0.483768	-4.567	41	48	36	27
AP001347.6	-0.0444159	-0.00778739	-0.114664	0.909926	0.971723	-5.29352	31	23	23	28
AP001372.2	0.171965	1.68627	0.766222	0.453052	0.748688	-5.45371	79	83	88	92
AP001432.14	-0.114985	-7.47289e-05	-0.306563	0.762543	0.912486	-5.26288	28	27	27	23
AP001468.1	0.202027	-0.196558	0.445025	0.66138	0.866727	-5.18443	33	14	29	20
AP001469.9	-0.0612215	1.76013	-0.268048	0.791579	0.923503	-5.71498	100	86	96	79
AP001601.2	0.192553	0.679813	0.590919	0.561607	0.814979	-5.30263	32	49	39	52
AP001628.6	0.0909074	2.02191	0.415974	0.682136	0.876475	-5.74941	115	97	129	94
AP001877.1	-0.026094	0.910869	-0.0895982	0.929553	0.977146	-5.50599	51	50	45	53
AP003068.23	-0.567843	2.01147	-2.65831	0.0156073	0.152435	-2.97683	110	156	86	89
AP003900.6	0.181071	1.35175	0.713151	0.484505	0.769389	-5.39731	66	62	68	75
AP006216.11	0.0492505	0.566754	0.152846	0.880147	0.961553	-5.41525	33	45	39	40
AP006222.2	-0.110597	4.15772	-1.10671	0.282369	0.615251	-5.92399	509	488	457	451
AP006621.1	0.155248	1.87164	0.707838	0.487723	0.771617	-5.54781	80	107	113	92
AP006621.5	-0.316176	1.47858	-1.28864	0.213146	0.542798	-4.92736	74	93	72	60
AP1AR	0.11237	4.93293	1.38217	0.18311	0.508317	-5.82676	712	872	825	859
AP1B1	0.0415117	7.10993	0.935272	0.361499	0.685015	-6.85101	3485	3839	3799	3627
AP1G1	0.09118	7.21392	2.04403	0.0552061	0.297341	-5.34238	3797	3935	4131	3985
AP1G2	0.128979	4.24346	1.23942	0.230431	0.560759	-5.8016	516	460	544	503
AP1M1	-0.0791982	5.93855	-1.30776	0.206709	0.536994	-6.17445	1649	1740	1659	1504
AP1S1	-0.0254966	5.15922	-0.360854	0.722228	0.895858	-6.76406	929	1009	960	916
AP1S2	0.0235816	4.44524	0.250706	0.804759	0.92956	-6.59525	524	641	620	546
AP1S3	0.195619	2.75861	1.22541	0.235541	0.565761	-5.3509	161	178	178	206
AP2A1	-0.199842	8.06548	-5.19488	5.3142e-05	0.00356051	1.30908	7338	8106	6594	6650
AP2A2	-0.109333	6.12598	-1.94938	0.0663166	0.324769	-5.26831	1911	1988	1813	1748
AP2B1	-0.0104627	8.74098	-0.303346	0.764955	0.912695	-7.49504	11047	12048	11395	11192
AP2M1	-0.0832922	8.0414	-2.10588	0.0488805	0.278752	-5.36689	7116	7460	6738	6821
AP2S1	-0.118857	6.52943	-2.32088	0.0316882	0.221373	-4.696	2524	2650	2337	2358
AP3B1	0.104673	6.35596	1.963	0.0646036	0.32011	-5.30021	2053	2194	2332	2169
AP3B2	-0.800862	1.11301	-2.75734	0.0126108	0.134979	-2.76327	82	71	36	51
AP3D1	0.00499081	7.87995	0.125833	0.901199	0.967603	-7.42522	6146	6495	6235	6265
AP3M1	0.0746212	7.37848	1.71661	0.102469	0.396192	-5.91573	4254	4463	4664	4384
AP3M2	0.0417198	5.25102	0.539816	0.595657	0.832359	-6.70438	937	1084	1109	944
AP3S1	0.0185499	5.02685	0.253131	0.802912	0.928585	-6.7641	822	920	882	856
AP3S2	0.032331	4.44524	0.318192	0.753844	0.908583	-6.57545	539	619	530	643
AP4B1	0.0715088	5.0133	0.936041	0.361113	0.684752	-6.34841	777	920	905	850
AP4E1	0.13986	5.60758	1.72315	0.101258	0.39392	-5.50716	1077	1441	1428	1290
AP4M1	-0.153404	3.59164	-1.23359	0.232544	0.562364	-5.60403	358	326	293	311
AP4S1	-0.217474	2.06003	-1.04493	0.309296	0.639441	-5.33155	125	116	91	114
AP5B1	0.015214	4.66118	0.178108	0.860542	0.95341	-6.67807	670	682	650	697
AP5M1	0.0777552	5.07654	1.07624	0.295426	0.628424	-6.22561	838	928	922	914
AP5S1	-0.0171658	4.44208	-0.191705	0.850027	0.949514	-6.60773	558	617	553	592
AP5Z1	-0.155155	6.32295	-2.8067	0.0113307	0.127568	-3.6865	2135	2410	1970	2051
APAF1	0.0824366	4.42447	0.865369	0.397737	0.71435	-6.24125	576	546	566	603
APBA2	0.0280209	5.28649	0.394229	0.697845	0.884438	-6.78329	1005	1072	1014	1074
APBA3	0.00177545	4.29913	0.0191902	0.984891	0.994801	-6.58128	526	531	528	514
APBB1	0.286461	2.17458	1.49126	0.15247	0.47253	-4.86232	104	115	143	121
APBB2	0.0690447	3.56597	0.574279	0.572582	0.821015	-6.17625	304	317	346	297
APBB3	-0.0220427	4.03063	-0.203826	0.840678	0.945916	-6.47352	433	452	475	387
APC	0.146212	7.06437	3.2848	0.00393531	0.0687738	-2.82475	3258	3585	3783	3677
APC2	-0.334581	3.62844	-2.9032	0.00917895	0.114275	-2.82168	360	386	306	277
APEH	-0.00388244	7.4461	-0.0907986	0.928612	0.976638	-7.35904	4392	5008	4683	4546
APEX1	0.0205895	7.24248	0.469477	0.644124	0.859141	-7.2105	3946	4136	4060	4018
APEX2	0.000238839	5.28253	0.00345696	0.997278	0.998935	-6.86289	988	1105	1026	1036
APH1A	-0.0157751	6.75143	-0.288195	0.776349	0.917601	-7.1805	2731	3098	2724	2960
APH1B	-0.0398213	3.88092	-0.375583	0.711428	0.890551	-6.37433	391	411	375	394
API5	0.0437758	7.70723	1.09945	0.285441	0.618337	-6.79274	5246	5828	5709	5534
APIP	-0.0474313	5.35291	-0.59701	0.557618	0.812709	-6.69662	1008	1232	1007	1128
APITD1	-0.0137427	2.99503	-0.0959498	0.924575	0.975685	-6.14561	205	225	222	198
APLNR	-0.291296	0.966	-0.989769	0.334847	0.661631	-5.09989	47	70	44	49
APLP1	-0.423016	2.06337	-2.07774	0.0516719	0.287229	-3.9803	137	123	99	91
APLP2	-0.012174	9.02149	-0.363328	0.72041	0.894483	-7.50664	13352	14723	13902	13519
APMAP	0.0194423	6.29474	0.353315	0.72778	0.898485	-7.05383	2054	2137	2067	2119
APOA1BP	-0.00833989	5.76318	-0.131547	0.896739	0.966307	-6.97557	1401	1527	1394	1476
APOBEC3B	-0.233667	5.0518	-3.17047	0.00508215	0.0806456	-2.62524	930	1003	798	822
APOBEC3C	-0.108983	6.80568	-2.30964	0.0324265	0.224525	-4.77677	2971	3278	2913	2795
APOBEC3D	-0.544852	2.12109	-2.54112	0.0200275	0.172765	-3.20174	126	157	117	77
APOBEC3F	-0.847167	1.42553	-3.36156	0.00331192	0.0622399	-1.6916	100	93	51	54
APOBEC3G	-0.4791	2.05097	-2.40348	0.0267221	0.202588	-3.43373	128	134	90	95
APOBR	-0.212098	1.31113	-0.723	0.478573	0.76555	-5.37987	67	76	85	43
APOC1	-0.288027	5.83404	-4.04535	0.000702682	0.0227168	-0.870858	1619	1769	1270	1473
APOE	-0.212711	7.79671	-4.5193	0.000239975	0.0106333	-0.176059	6176	6694	5234	5721
APOL1	-0.268677	6.00334	-4.5386	0.00022975	0.010312	0.201001	1859	1925	1528	1567
APOL2	-0.219238	5.03083	-2.80146	0.0114605	0.128182	-3.39324	861	1040	792	814
APOL4	-0.232774	5.20899	-3.30213	0.00378522	0.067218	-2.37783	1037	1118	894	913
APOL6	0.335656	1.36657	1.30611	0.20726	0.536994	-4.88322	51	73	80	73
APOLD1	-0.576031	0.516307	-1.76254	0.0942161	0.382389	-4.21099	48	45	30	31
APOM	0.153053	2.22721	0.794306	0.436923	0.738265	-5.59646	123	115	121	140
APOO	-0.025872	2.9784	-0.177447	0.861054	0.953678	-6.12876	202	225	223	191
APOOL	0.140713	3.38763	1.08486	0.29169	0.624491	-5.70294	244	292	275	308
APOPT1	0.0139137	3.18309	0.103478	0.918678	0.97446	-6.2086	232	253	233	250
APPBP2	0.0361828	5.04503	0.468119	0.645077	0.859919	-6.68877	839	914	948	826
APPL1	0.118824	5.34541	1.46414	0.159664	0.481283	-5.82126	995	1104	1249	1007
APPL2	-0.024051	4.18316	-0.237075	0.815161	0.933719	-6.51528	441	547	505	451
APRT	-0.0782628	7.77798	-1.97109	0.0636056	0.31789	-5.56558	5819	6308	5643	5674
APTX	0.140272	5.13672	1.96075	0.0648838	0.32081	-5.00689	875	926	1005	951
AQP1	-0.556202	1.25207	-2.07016	0.0524482	0.289803	-3.86271	0	0	0	0
AQP1	-0.556202	1.25207	-2.07016	0.0524482	0.289803	-3.86271	68	87	46	58
AQP10	-0.330221	5.38843	-4.49032	0.000256198	0.0111477	0.220593	1212	1312	935	1047
AQP11	0.188566	1.98085	0.919879	0.369281	0.690697	-5.42115	94	104	121	102
AQP2	-0.229625	0.780835	-0.748357	0.463498	0.756177	-5.23593	47	52	36	48
AQP3	-0.327408	5.81928	-5.48112	2.8418e-05	0.00227821	2.32821	1623	1778	1343	1327
AQP7	-0.84112	0.44103	-2.40613	0.0265755	0.201959	-3.33575	38	61	28	25
AQPEP	0.0771226	1.03682	0.275945	0.785599	0.921471	-5.50816	47	60	59	52
AQR	0.13564	6.58948	2.62632	0.016712	0.157908	-4.1138	2288	2660	2721	2629
ARAF	-0.0971133	6.37979	-1.86435	0.077952	0.351175	-5.47085	2245	2385	2175	2090
ARAP1	-0.09991	6.65324	-2.05652	0.053872	0.29346	-5.20535	2670	2934	2603	2548
ARCN1	0.0747732	7.70016	1.78168	0.0909501	0.376579	-5.86757	5200	5700	5897	5419
AREL1	0.110647	5.77727	1.83076	0.083024	0.362664	-5.37863	1375	1462	1521	1497
ARF1	-0.000148985	9.12335	-0.0045113	0.996448	0.998753	-7.58719	14353	15644	15026	14524
ARF3	-0.0334887	7.62407	-0.710296	0.486233	0.770698	-7.13268	5362	5367	5404	4932
ARF4	0.0735607	6.46105	1.18809	0.249582	0.580591	-6.44622	2314	2304	2575	2221
ARF5	-0.0583536	6.04741	-0.982895	0.338131	0.664151	-6.56502	1749	1880	1811	1626
ARF6	-0.14968	6.3223	-2.58815	0.0181275	0.164859	-4.13002	2188	2342	1934	2094
ARFGAP1	-0.0131682	7.05859	-0.26992	0.79016	0.922996	-7.25067	3573	3626	3648	3383
ARFGAP2	0.0372137	7.7512	0.868704	0.395956	0.713647	-7.02607	5350	6099	5694	5873
ARFGAP3	-0.0383337	3.94561	-0.350558	0.729815	0.899476	-6.40431	415	424	440	367
ARFGEF1	0.0846499	6.31817	1.56119	0.135144	0.448284	-5.92585	1979	2189	2266	2090
ARFGEF2	0.0650608	6.67452	1.21109	0.240854	0.570467	-6.46743	2452	2932	2851	2689
ARFIP1	-0.0715855	5.0797	-0.981342	0.338876	0.664991	-6.32246	888	976	907	841
ARFIP2	-0.0467406	5.86208	-0.770134	0.450783	0.747121	-6.70492	1550	1627	1495	1536
ARFRP1	-0.0247076	5.97172	-0.422718	0.677293	0.874601	-6.94519	1611	1794	1707	1591
ARG2	-0.158618	2.21583	-0.715024	0.483373	0.768885	-5.64907	101	169	103	132
ARGFXP2	-0.0306114	0.0649982	-0.075124	0.940909	0.980799	-5.31158	34	23	20	36
ARGLU1	0.000685112	6.35388	0.0125673	0.990105	0.996572	-7.1331	2172	2223	2156	2176
ARHGAP1	-0.0371098	6.14766	-0.671415	0.510117	0.785218	-6.84971	1865	1996	1905	1803
ARHGAP10	-0.0444716	1.47594	-0.18166	0.857793	0.952906	-5.64833	73	78	81	64
ARHGAP11A	0.0793359	7.79742	1.96667	0.0641488	0.31903	-5.57616	5479	6169	6223	5897
ARHGAP11B	0.038306	5.89522	0.65564	0.519994	0.790743	-6.7965	1510	1648	1627	1568
ARHGAP12	-0.164011	3.69046	-1.43161	0.168658	0.492556	-5.38913	332	404	326	320
ARHGAP17	-0.00136767	5.261	-0.0196497	0.98453	0.994787	-6.85725	981	1082	1052	979
ARHGAP18	0.0684716	5.70512	1.10009	0.28517	0.618263	-6.35765	1307	1432	1401	1429
ARHGAP19	-0.00683502	5.8579	-0.107865	0.915245	0.972983	-7.00285	1426	1707	1535	1532
ARHGAP21	0.029732	5.94305	0.496709	0.625148	0.849019	-6.90275	1624	1649	1672	1619
ARHGAP22	0.0144244	3.75515	0.109007	0.914351	0.972874	-6.39958	296	436	346	375
ARHGAP23	-0.995297	0.863225	-3.27287	0.00404201	0.0699858	-1.93066	68	69	29	39
ARHGAP24	-0.00450196	2.67835	-0.0271447	0.97863	0.992889	-6.04442	177	167	158	180
ARHGAP25	-0.173696	0.375994	-0.495933	0.625686	0.849079	-5.27899	42	32	36	28
ARHGAP26	0.521497	0.293794	1.50242	0.149588	0.468943	-4.49156	26	28	36	41
ARHGAP27	-0.181569	2.09646	-0.925687	0.366331	0.688995	-5.45038	121	123	113	99
ARHGAP28	-0.0138599	2.62146	-0.0850185	0.933145	0.978289	-6.02255	154	178	170	154
ARHGAP30	-0.0993278	0.574104	-0.302293	0.765745	0.913239	-5.38789	34	49	43	33
ARHGAP33	-0.119301	4.34753	-1.31646	0.203831	0.533431	-5.73993	558	582	535	499
ARHGAP35	-0.0875275	6.24141	-1.26575	0.221055	0.551224	-6.30167	2021	2170	1792	2110
ARHGAP39	0.175987	5.19667	2.34497	0.0301578	0.215363	-4.33289	928	926	1004	1060
ARHGAP42	0.398848	0.865133	1.15259	0.263512	0.593925	-4.93489	62	29	55	54
ARHGAP44	-0.729244	-0.306874	-1.77029	0.0928823	0.380113	-4.15884	26	29	13	20
ARHGAP5	0.128893	5.70895	2.06298	0.0531933	0.291552	-4.96963	1304	1385	1501	1397
ARHGAP5-AS1	0.339784	0.357417	0.975185	0.341842	0.666925	-4.99182	25	36	34	42
ARHGAP6	0.121209	5.38798	1.80132	0.087703	0.371206	-5.33037	1015	1145	1186	1128
ARHGDIA	-0.100462	7.52668	-2.36244	0.0290909	0.211334	-4.81494	5050	5213	4787	4646
ARHGDIB	0.109946	4.43662	1.24296	0.229152	0.559822	-5.85693	550	570	618	573
ARHGDIG	-0.44888	0.508899	-1.29414	0.211277	0.540927	-4.73571	39	50	42	24
ARHGEF1	-0.0243296	6.81369	-0.508395	0.617086	0.844796	-7.10298	2922	3179	3056	2856
ARHGEF10	0.0704727	4.77032	0.848778	0.406675	0.719923	-6.35965	682	750	794	690
ARHGEF11	-0.0342878	5.58186	-0.528647	0.603232	0.836403	-6.79363	1211	1398	1265	1243
ARHGEF12	0.062234	7.66973	1.38231	0.18307	0.508307	-6.44672	5012	5717	5799	5239
ARHGEF16	-0.269634	1.59451	-1.15184	0.263814	0.594064	-5.09883	79	99	71	74
ARHGEF17	0.121164	0.488144	0.341927	0.736196	0.90234	-5.35755	40	32	50	29
ARHGEF18	-0.000609444	4.10005	-0.00620348	0.995116	0.998085	-6.51735	432	490	448	460
ARHGEF19	-0.253241	3.4705	-2.04857	0.0547178	0.295929	-4.38551	305	345	256	282
ARHGEF2	-0.478634	5.84679	-7.6487	3.46002e-07	7.16224e-05	6.75263	1743	1911	1367	1219
ARHGEF25	-0.274418	3.29914	-2.04846	0.0547291	0.295929	-4.33628	276	305	219	256
ARHGEF3	-0.383599	1.66058	-1.5925	0.127934	0.439038	-4.60356	103	91	85	62
ARHGEF39	0.160399	4.6032	1.70562	0.104534	0.400714	-5.27562	536	708	681	682
ARHGEF40	-0.823707	2.83917	-5.36844	3.63203e-05	0.00274847	2.37289	250	261	147	137
ARHGEF6	-0.171409	2.14699	-0.878562	0.390722	0.709889	-5.5052	130	122	106	114
ARHGEF7	0.0613507	5.81588	1.01626	0.322395	0.649909	-6.47313	1451	1513	1544	1503
ARHGEF9	0.338683	3.66612	2.99694	0.00746919	0.100879	-2.64082	298	308	382	373
ARID1A	-0.0283882	7.59879	-0.689823	0.498727	0.778547	-7.14317	5107	5418	5223	4948
ARID1B	0.206807	6.9259	4.48996	0.000256408	0.0111477	-0.0968758	2888	3200	3480	3441
ARID2	0.210219	6.01113	3.30915	0.00372603	0.0667652	-2.54569	1481	1750	1946	1736
ARID3A	-0.449949	7.99876	-11.196	9.26719e-10	1.1541e-06	12.5089	7660	8419	5705	5892
ARID3B	-0.318543	5.95449	-4.96839	8.7717e-05	0.00515486	1.17283	1885	1839	1518	1422
ARID4A	0.046419	4.07777	0.422004	0.677805	0.874745	-6.41891	389	509	436	475
ARID4B	0.145026	5.49094	2.20484	0.0401177	0.251648	-4.6629	1079	1222	1286	1220
ARID5A	0.0703657	3.51461	0.57669	0.570985	0.820366	-6.15801	304	295	303	316
ARID5B	0.562152	3.62135	4.59175	0.000203815	0.00948559	0.77001	273	271	430	363
ARIH1	0.0814413	6.09239	1.43717	0.167094	0.489529	-6.04456	1680	1889	1917	1803
ARIH2	0.116388	6.65272	2.25994	0.0358868	0.238369	-4.83728	2516	2680	2909	2645
ARIH2OS	0.323475	0.833166	1.0611	0.302079	0.634682	-5.0116	46	39	47	58
ARL1	0.179534	5.97301	2.88624	0.00952622	0.116368	-3.43953	1459	1721	1853	1693
ARL13B	-0.061158	4.0708	-0.536673	0.597783	0.833407	-6.36052	391	540	430	443
ARL14EP	0.0639317	4.80238	0.792047	0.438206	0.738799	-6.41555	691	777	799	714
ARL15	0.0289919	5.65928	0.462211	0.649231	0.861546	-6.84722	1315	1374	1368	1335
ARL16	-0.0603477	4.24058	-0.614831	0.546031	0.80648	-6.36924	531	507	506	473
ARL17A	0.2259	2.20914	1.21168	0.240634	0.570258	-5.2052	109	120	134	130
ARL17B	-0.639121	0.419342	-1.89577	0.0734586	0.341419	-4.03571	40	49	26	30
ARL2	0.19662	4.92672	2.57724	0.0185527	0.166468	-3.81925	738	789	897	828
ARL2BP	0.0665819	5.23706	0.832316	0.415671	0.725618	-6.49718	870	1123	1047	1000
ARL3	-0.328909	3.63164	-2.8816	0.00962343	0.116974	-2.86624	358	388	291	294
ARL4A	0.0234611	7.56671	0.575702	0.571639	0.82067	-7.21207	4801	5315	5091	5036
ARL4D	0.103953	1.29864	0.388324	0.702135	0.886289	-5.54433	68	59	59	76
ARL5A	0.144758	6.68508	2.60107	0.0176364	0.162632	-4.18485	2404	2872	3011	2730
ARL5B	0.172602	6.05787	2.77902	0.0120322	0.131512	-3.68169	1567	1812	1990	1764
ARL5B-AS1	-0.0304558	0.238057	-0.0855768	0.932707	0.978274	-5.34777	26	38	30	31
ARL6	-0.281046	1.48373	-1.11757	0.277817	0.609658	-5.10483	68	99	64	70
ARL6IP1	0.0870548	7.87574	2.12418	0.0471396	0.274795	-5.31128	5764	6502	6650	6184
ARL6IP4	0.199944	0.0791671	0.547635	0.590381	0.830019	-5.19705	25	27	29	30
ARL6IP5	-0.108979	5.43942	-1.53932	0.140376	0.453183	-5.73933	1097	1333	1124	1091
ARL6IP6	0.0195729	5.22835	0.260442	0.797352	0.926404	-6.81398	919	1087	1060	943
ARL8A	-0.0378847	3.14367	-0.273391	0.787531	0.921784	-6.16286	245	236	242	219
ARL8B	0.0206085	7.23219	0.45007	0.657803	0.865566	-7.21776	3790	4243	4188	3842
ARMC1	0.0723676	6.54587	1.45136	0.163152	0.485214	-6.13303	2327	2574	2566	2510
ARMC10	0.123507	5.19034	1.7545	0.095619	0.385321	-5.35629	909	971	1007	1011
ARMC2	-0.0613939	0.720953	-0.194322	0.848006	0.948422	-5.44573	40	50	51	35
ARMC5	-0.0465633	5.14611	-0.654096	0.520966	0.790983	-6.60798	941	993	942	903
ARMC6	0.00273981	6.67156	0.0542324	0.957322	0.984718	-7.2049	2542	2942	2749	2659
ARMC7	-0.340326	4.41867	-3.86918	0.00104888	0.0288059	-0.953507	624	669	504	502
ARMC8	0.0680009	5.16357	0.958918	0.349762	0.673351	-6.36546	885	998	986	958
ARMC9	-0.127186	2.86024	-0.850947	0.405499	0.719167	-5.74884	200	207	182	185
ARMCX3	-0.328501	4.46511	-3.60274	0.00192079	0.0445475	-1.54849	612	720	504	541
ARMCX5	0.147409	3.96562	1.4242	0.170766	0.494845	-5.48406	365	434	442	429
ARMCX6	-0.138274	3.2111	-1.04728	0.308238	0.638911	-5.68364	243	279	237	230
ARNT	0.0300637	5.81751	0.502618	0.621065	0.847178	-6.86751	1450	1550	1515	1503
ARNTL	-0.170395	2.72166	-1.02818	0.316905	0.645818	-5.54631	163	215	178	152
ARNTL2	0.212776	3.56764	1.66062	0.113365	0.414408	-5.03155	270	323	379	301
ARPC1A	-0.00970729	6.39285	-0.185448	0.854863	0.951685	-7.12449	2130	2407	2257	2181
ARPC1B	-0.0685331	6.8608	-1.23636	0.231537	0.561103	-6.47748	2953	3460	3211	2816
ARPC2	0.00609935	7.00705	0.132881	0.895698	0.966307	-7.26897	3369	3531	3483	3345
ARPC3	0.0148554	7.25841	0.341574	0.736457	0.90234	-7.26749	3868	4328	4169	3987
ARPC4	-0.0959925	6.0744	-1.68	0.109487	0.409514	-5.69	1784	1963	1795	1660
ARPC5	0.0231021	6.81717	0.483293	0.634464	0.854506	-7.11658	2842	3176	3002	3021
ARPC5L	0.00168997	6.86328	0.0357214	0.971881	0.990327	-7.24738	2991	3266	3062	3110
ARPP19	0.0983987	7.85716	2.37074	0.0285964	0.210288	-4.85068	5611	6457	6542	6176
ARRB1	-0.291479	5.48894	-4.27847	0.000413827	0.0157029	-0.274279	1292	1378	1041	1110
ARRB2	-0.0480931	4.58914	-0.551941	0.587486	0.827949	-6.51583	627	688	599	656
ARRDC1	-0.225212	4.5534	-2.6292	0.0166098	0.157136	-3.61784	648	717	604	547
ARRDC2	-0.126137	5.26064	-1.74401	0.097474	0.388021	-5.38976	995	1161	953	992
ARRDC3	0.119689	5.31753	1.75702	0.0951774	0.384272	-5.38343	998	1058	1103	1098
ARRDC4	-0.119692	5.26677	-1.723	0.101285	0.39392	-5.42393	1013	1146	1003	954
ARSA	-0.12991	3.5349	-1.1041	0.28347	0.616213	-5.73001	317	334	300	286
ARSB	0.0638049	4.16104	0.670763	0.510523	0.785286	-6.30776	452	488	487	481
ARSG	-0.0537344	2.20027	-0.258686	0.798687	0.926821	-5.8578	131	120	101	140
ARSK	-0.00774773	3.6395	-0.0672474	0.947094	0.982442	-6.36526	336	335	327	330
ART4	0.293271	1.88059	1.32847	0.199913	0.529322	-4.98259	82	96	95	122
ARV1	0.0236978	5.8384	0.370097	0.715444	0.892528	-6.93266	1391	1668	1575	1484
ARVCF	-0.143178	5.86131	-2.37982	0.0280647	0.208163	-4.42612	1546	1741	1513	1419
ASAH1	0.0543212	6.16109	0.98765	0.335857	0.662292	-6.58889	1796	1981	1983	1881
ASAH2	0.501341	0.967346	1.59737	0.126843	0.437718	-4.46949	49	39	49	76
ASAH2B	0.256779	3.50253	1.89994	0.0728791	0.340323	-4.64147	275	282	377	284
ASAP1	0.069232	5.35681	0.878318	0.390851	0.709889	-6.48763	942	1222	1115	1111
ASAP2	-0.0974918	3.59697	-0.81316	0.426298	0.729737	-6.02124	338	334	296	323
ASAP3	-0.209778	3.81667	-1.79316	0.0890399	0.373418	-4.9045	424	391	331	362
ASB1	-0.062544	6.34269	-1.16388	0.25902	0.589911	-6.44606	2124	2337	2189	2021
ASB13	0.224948	4.90037	2.81532	0.0111203	0.126624	-3.33384	733	751	827	883
ASB14	0.258849	0.0621108	0.675013	0.507879	0.783078	-5.13248	19	33	33	27
ASB16	0.0151074	1.5734	0.057167	0.955015	0.984409	-5.69089	75	83	61	102
ASB16-AS1	-0.0432283	3.48439	-0.349743	0.730416	0.899897	-6.25364	308	302	282	301
ASB18	0.434274	-0.0162754	1.02425	0.318706	0.64726	-4.89273	14	35	26	35
ASB6	0.0597282	5.22062	0.852201	0.404821	0.719105	-6.47623	933	1031	1041	976
ASB7	-0.0277802	4.56703	-0.322734	0.750456	0.906864	-6.61181	593	695	614	630
ASB8	-0.00282045	5.11209	-0.0386885	0.969546	0.989597	-6.81872	896	965	956	875
ASCC1	0.0617345	5.45946	0.901981	0.37847	0.696893	-6.49221	1082	1236	1250	1134
ASCC2	-0.00834165	6.30452	-0.15693	0.876972	0.96053	-7.10837	2071	2190	2097	2077
ASCC3	0.0944534	6.90065	2.02652	0.0571252	0.301817	-5.31044	2929	3293	3312	3230
ASCL2	-0.523798	0.816501	-1.62005	0.121863	0.428855	-4.41983	43	73	45	33
ASF1A	0.023867	6.28686	0.450754	0.657319	0.865258	-7.0113	2009	2154	2109	2061
ASF1B	-0.00688564	6.62178	-0.140275	0.889933	0.964843	-7.18501	2570	2737	2635	2569
ASGR1	0.548819	0.314808	1.35478	0.191535	0.518119	-4.64725	16	45	35	45
ASH1L	0.0714964	6.26773	1.1917	0.248195	0.579107	-6.3963	2045	1997	2172	2011
ASH1L-AS1	0.0627688	2.65624	0.386448	0.7035	0.886552	-5.96359	169	162	175	165
ASH2L	0.0308167	8.21107	0.832137	0.415769	0.725687	-7.12168	7485	8288	8064	7807
ASIC1	-0.305749	3.6103	-2.30066	0.0330281	0.227103	-3.98062	398	335	280	300
ASIC3	-0.16345	3.63001	-1.34404	0.19492	0.522822	-5.48274	351	353	341	280
ASIC4	-0.7869	5.18352	-10.1645	4.46548e-09	3.34403e-06	11.0955	1298	1268	721	743
ASL	-0.0923074	4.57709	-1.09177	0.288718	0.621934	-6.06977	630	695	640	585
ASMTL	-0.0706708	3.82114	-0.655192	0.520275	0.790746	-6.20914	381	397	381	349
ASMTL-AS1	0.157447	1.93466	0.722073	0.479129	0.765573	-5.5575	102	92	95	119
ASNA1	0.0134765	6.3427	0.253234	0.802834	0.928585	-7.09699	2127	2215	2171	2147
ASNS	0.110842	5.69995	1.68007	0.109472	0.409514	-5.59637	1355	1334	1426	1433
ASNSD1	0.0498091	6.03916	0.775411	0.447735	0.745365	-6.74604	1557	1932	1808	1740
ASNSP5	-0.26395	1.20533	-0.995584	0.332086	0.659086	-5.14904	64	71	61	50
ASPH	0.0443245	5.83106	0.69595	0.494968	0.776749	-6.7523	1387	1633	1597	1469
ASPM	0.165212	8.0734	4.40022	0.000314072	0.0128872	-0.483148	6527	7155	7689	7425
ASPRV1	-0.516297	0.526967	-1.58491	0.129651	0.440934	-4.42538	41	51	30	33
ASPSCR1	-0.158202	5.5472	-2.42447	0.0255809	0.197455	-4.26466	1272	1384	1222	1124
ASRGL1	-0.0682315	4.01389	-0.65717	0.519031	0.790343	-6.26964	402	489	414	422
ASS1	-0.0507374	2.6235	-0.295553	0.770808	0.915	-5.98345	152	185	145	177
ASS1P12	0.212069	1.28692	0.823857	0.420343	0.727555	-5.30508	62	59	68	70
ASTE1	0.0766306	2.70291	0.481744	0.635544	0.855072	-5.93792	171	169	174	179
ASTN2	-0.0565379	1.92195	-0.242595	0.810944	0.932354	-5.77192	94	113	79	122
ASUN	0.0532898	6.05157	0.942624	0.357821	0.681712	-6.60474	1651	1852	1817	1763
ASXL1	-0.0583106	7.38652	-1.27045	0.21941	0.549476	-6.54055	4224	4977	4423	4269
ASXL2	0.107566	6.62839	2.20149	0.0403893	0.252097	-4.9399	2457	2668	2738	2702
ATAD1	0.0392044	5.81271	0.585175	0.565383	0.816717	-6.82011	1339	1653	1507	1514
ATAD2	0.0624549	7.33051	1.4608	0.16057	0.482224	-6.28242	3999	4476	4436	4280
ATAD2B	0.225961	5.69935	3.30761	0.00373891	0.0668235	-2.47654	1221	1364	1601	1383
ATAD3A	0.0651718	7.83975	1.5412	0.13992	0.452133	-6.254	5656	6398	6099	6320
ATAD3B	0.0697498	7.56613	1.69861	0.10587	0.403511	-5.97647	4829	5116	5253	5033
ATAD5	0.134674	5.91429	2.27481	0.0348173	0.233991	-4.63714	1454	1643	1721	1628
ATAT1	-0.0518113	3.56841	-0.39879	0.694538	0.882722	-6.2631	322	327	352	269
ATE1	0.218432	4.56083	2.46246	0.0236305	0.187605	-3.94584	586	590	716	633
ATF1	-0.0266615	5.42585	-0.399185	0.694252	0.882722	-6.81621	1135	1197	1163	1093
ATF2	0.0288623	5.399	0.415566	0.682429	0.876475	-6.80262	1043	1206	1180	1080
ATF3	-0.272317	1.41423	-1.02974	0.316191	0.645269	-5.16928	92	67	65	62
ATF4	-0.0676438	7.75009	-1.71298	0.103147	0.397707	-5.98354	5692	6159	5587	5554
ATF5	-0.0129465	5.91392	-0.201764	0.842267	0.946697	-7.0021	1610	1646	1690	1493
ATF6	0.0877595	6.5496	1.67098	0.111277	0.412205	-5.81636	2300	2590	2674	2447
ATF6B	-0.0267676	6.58722	-0.526715	0.604547	0.837136	-7.04324	2549	2668	2603	2444
ATF7	-0.0789399	4.47306	-0.902702	0.378097	0.696509	-6.22338	571	657	591	554
ATF7IP	0.0887472	5.23294	1.18938	0.249086	0.580162	-6.14025	884	1083	1049	1007
ATF7IP2	-0.00499197	5.53735	-0.0711765	0.944008	0.981606	-6.92447	1134	1374	1210	1248
ATG10	-0.0777451	4.22579	-0.812244	0.42681	0.730174	-6.22303	472	563	492	473
ATG12	-0.0233979	5.805	-0.376344	0.710872	0.890551	-6.92164	1407	1627	1459	1480
ATG13	0.0713516	6.48732	1.41071	0.174653	0.49886	-6.17459	2266	2440	2487	2385
ATG14	-0.115781	4.38036	-1.23865	0.230708	0.560762	-5.84448	549	617	571	491
ATG16L1	-0.123169	5.37728	-1.80323	0.0873922	0.371206	-5.32457	1094	1240	1094	1017
ATG16L2	-0.150901	2.57583	-0.916811	0.370845	0.691204	-5.60363	160	177	155	144
ATG2A	-0.207112	6.32182	-3.56338	0.00209992	0.0471259	-2.05722	2333	2288	1987	1954
ATG2B	0.154043	5.25238	2.07693	0.0517545	0.287412	-4.83461	931	1012	1142	992
ATG3	0.140892	5.57018	1.996	0.060616	0.309981	-5.05184	1242	1191	1308	1332
ATG4A	0.0845922	4.09004	0.837989	0.412557	0.723882	-6.15903	432	456	445	484
ATG4B	-0.016795	6.64005	-0.330767	0.744476	0.904624	-7.14227	2534	2865	2725	2532
ATG4C	0.190462	3.6845	1.63624	0.118409	0.423857	-5.10295	288	361	375	353
ATG4D	-0.161834	4.87604	-1.97475	0.0631577	0.316445	-4.91661	801	869	795	679
ATG5	-0.033913	5.83429	-0.531581	0.601237	0.835614	-6.85632	1481	1624	1590	1402
ATG7	0.0433254	4.80511	0.551445	0.587819	0.828166	-6.5801	719	761	778	725
ATG9A	-0.0650489	7.18989	-1.49431	0.151679	0.472092	-6.20894	3876	4153	3807	3755
ATG9B	-0.0842328	2.19882	-0.396307	0.696338	0.883255	-5.81348	145	111	105	131
ATHL1	-0.164089	6.01953	-2.66522	0.0153778	0.151151	-3.90394	1797	1895	1728	1523
ATIC	0.0166865	7.99675	0.439065	0.665615	0.868814	-7.34944	6493	7168	6873	6739
ATL2	0.106446	6.71024	2.20776	0.0398827	0.251116	-4.94612	2615	2811	2944	2812
ATL3	0.186813	6.10177	3.21767	0.00457373	0.0760167	-2.76547	1597	1870	1982	1902
ATM	0.0811511	6.56772	1.52302	0.144386	0.459813	-6.0382	2450	2508	2694	2476
ATMIN	0.119809	6.21734	2.15611	0.0442354	0.265029	-4.92849	1849	1989	2141	1970
ATN1	-0.279477	7.1051	-5.78134	1.48854e-05	0.0013582	2.74144	4070	4083	3328	3289
ATOX1	-0.225421	4.46387	-2.11546	0.0479623	0.276898	-4.55775	580	705	484	605
ATP11A	-0.0260807	6.10799	-0.455689	0.65383	0.863222	-6.96481	1851	1890	1827	1792
ATP11B	0.155503	6.8935	3.06797	0.00638332	0.0926223	-3.25962	2776	3295	3325	3326
ATP11C	0.0595089	4.78988	0.681324	0.503967	0.780387	-6.49427	667	793	813	688
ATP13A1	-0.0539973	7.333	-1.24137	0.229725	0.560531	-6.5659	4322	4509	4286	4097
ATP13A2	-0.0182216	5.50331	-0.258658	0.798708	0.926821	-6.88368	1157	1299	1281	1112
ATP13A3	0.168873	7.13435	3.33436	0.00352089	0.0640754	-2.72963	3283	3857	4151	3753
ATP1A1	-0.0271234	9.46202	-0.798366	0.434621	0.736582	-7.29407	18189	20114	19201	17840
ATP1A1OS	0.00611634	1.2851	0.0233415	0.981624	0.994004	-5.60913	67	63	72	57
ATP1B1	-0.123363	2.47599	-0.692507	0.497079	0.778049	-5.74509	152	159	127	156
ATP1B2	-0.459182	4.40789	-4.93581	9.43116e-05	0.00538275	1.39462	610	731	503	457
ATP1B3	0.0350119	6.76477	0.707473	0.487944	0.77173	-6.96811	2803	2973	3036	2798
ATP2A1	0.00177699	2.25946	0.00933903	0.992647	0.997177	-5.90973	112	146	137	117
ATP2A2	0.0494912	8.89543	1.41203	0.174267	0.498787	-6.56613	12274	12890	13111	12557
ATP2A3	-0.370019	5.24853	-5.29554	4.26004e-05	0.00302987	2.02796	1115	1208	876	895
ATP2B1	-0.065358	5.90006	-1.09237	0.28846	0.621702	-6.41536	1615	1668	1546	1545
ATP2B4	-0.241365	4.63927	-2.77628	0.0121039	0.131973	-3.34567	657	804	624	591
ATP2C1	0.00153941	5.61778	0.0243632	0.980819	0.993783	-6.94722	1272	1366	1297	1305
ATP5A1	0.0209742	9.18739	0.627727	0.537728	0.801344	-7.38944	14699	16448	15749	15370
ATP5B	0.0243152	10.493	0.812943	0.426419	0.729854	-7.37382	36279	40627	38786	38221
ATP5C1	-0.00554528	7.55355	-0.125593	0.901387	0.967603	-7.37392	4823	5300	4847	5091
ATP5D	-0.151944	7.19914	-3.23347	0.00441486	0.0742429	-2.96196	3868	4474	3830	3562
ATP5E	-0.187855	6.79518	-1.96872	0.0638962	0.318654	-5.38737	3056	3313	2332	3262
ATP5F1	0.0170872	8.69157	0.449558	0.658166	0.865961	-7.43187	10290	11846	11351	10697
ATP5G1	0.0166632	6.54136	0.308862	0.760821	0.911871	-7.12731	2460	2517	2432	2530
ATP5G2	-0.113152	7.70299	-2.20943	0.0397489	0.25084	-5.13032	5898	5751	5149	5466
ATP5G3	-0.0736474	8.51859	-1.8599	0.0786088	0.352966	-5.84987	9632	10604	9238	9710
ATP5H	-0.0505189	6.04254	-0.847965	0.407117	0.7201	-6.68736	1796	1810	1767	1663
ATP5I	-0.489999	4.81342	-3.51861	0.00232379	0.0502004	-1.81166	869	919	490	807
ATP5J	-0.0903752	6.90232	-1.65531	0.114448	0.416279	-5.91618	3347	3288	2997	3143
ATP5J2	-0.127895	6.8002	-1.62137	0.121578	0.428855	-5.94548	3153	3107	2518	3166
ATP5L	-0.0270248	7.34597	-0.492037	0.628386	0.851063	-7.21886	4188	4644	4013	4545
ATP5O	0.0919612	6.67404	1.60787	0.124517	0.433792	-5.93859	2499	2825	3008	2592
ATP5S	0.00646871	3.7285	0.0580952	0.954285	0.984101	-6.39522	346	364	343	360
ATP5SL	0.022406	6.02941	0.378125	0.70957	0.89043	-6.97847	1644	1842	1704	1785
ATP6AP1	-0.0146008	6.49831	-0.288313	0.776259	0.917601	-7.1238	2363	2522	2436	2329
ATP6AP1L	-0.0661448	2.45945	-0.385856	0.703932	0.886636	-5.90048	140	162	143	141
ATP6AP2	0.0460629	5.84524	0.775207	0.447852	0.745428	-6.69676	1444	1599	1581	1514
ATP6V0A1	-0.0272674	7.52605	-0.526655	0.604588	0.837136	-7.23303	4894	5110	5226	4472
ATP6V0A2	-0.183092	6.46663	-3.49268	0.00246412	0.0520355	-2.2455	2470	2596	2278	2120
ATP6V0B	0.056477	7.01591	1.05699	0.3039	0.635583	-6.71132	3241	3584	3332	3670
ATP6V0C	0.303257	3.77393	1.5	0.150209	0.469518	-5.32156	288	379	569	284
ATP6V0D1	-0.0509033	6.36269	-0.96056	0.348957	0.672648	-6.66393	2161	2343	2219	2066
ATP6V0E1	0.0458904	5.51818	0.638543	0.530817	0.796371	-6.7119	1084	1351	1258	1211
ATP6V0E2	-0.058192	4.56379	-0.589964	0.562234	0.815178	-6.48582	556	752	634	596
ATP6V0E2-AS1	0.210876	2.50604	1.24742	0.22755	0.558702	-5.25104	137	146	169	154
ATP6V1A	-0.0264868	7.14271	-0.495814	0.625768	0.849079	-7.17769	3477	4217	3894	3536
ATP6V1B2	-0.0689444	7.66403	-1.7278	0.100403	0.392805	-5.9471	5320	5853	5288	5204
ATP6V1C1	0.0888516	6.85065	1.75039	0.0963425	0.386625	-5.75866	2762	3269	3230	3080
ATP6V1C2	0.0647688	0.863988	0.22045	0.827895	0.939468	-5.4763	43	52	53	45
ATP6V1D	-0.200219	4.79402	-2.39064	0.027443	0.205649	-4.14582	722	881	676	696
ATP6V1E1	-0.0377824	7.17624	-0.852078	0.404887	0.719105	-6.93887	3712	4173	3795	3769
ATP6V1E2	-0.0369467	2.89998	-0.246169	0.808217	0.930608	-6.08778	208	198	200	189
ATP6V1F	-0.0496167	6.94971	-1.03028	0.31594	0.6452	-6.72521	3350	3410	3276	3159
ATP6V1G1	0.0286442	6.54444	0.552405	0.587174	0.827949	-7.01935	2315	2660	2492	2504
ATP6V1H	0.0358523	5.93269	0.587941	0.563563	0.815957	-6.84919	1598	1645	1710	1567
ATP7A	0.184733	6.13952	3.04349	0.00673905	0.0951771	-3.14775	1620	1944	1965	2020
ATP7B	0.0407158	5.6237	0.599172	0.556206	0.812429	-6.76346	1237	1377	1270	1382
ATP8A1	0.206052	0.0207534	0.526925	0.604404	0.837136	-5.19445	18	34	28	29
ATP8A2	0.112102	0.570622	0.303824	0.764596	0.912615	-5.38677	45	32	29	56
ATP8B1	0.193951	1.50265	0.788348	0.440314	0.740209	-5.38697	64	78	91	70
ATP8B2	-0.00367397	7.41604	-0.0881813	0.930664	0.97754	-7.35391	4443	4751	4578	4458
ATP8B3	-0.340141	2.63157	-2.00196	0.0599202	0.307756	-4.23281	171	204	164	129
ATP9A	0.232058	0.335978	0.593718	0.559772	0.813692	-5.227	19	49	36	36
ATP9B	-0.067437	4.11377	-0.639445	0.530243	0.795881	-6.31312	498	456	463	431
ATPAF1	0.13983	5.75717	2.10852	0.0486256	0.278328	-4.90103	1282	1493	1595	1418
ATPAF2	-0.119018	4.16869	-1.22971	0.233963	0.563544	-5.7894	491	516	480	434
ATPIF1	-0.161964	7.31889	-2.77419	0.0121589	0.13213	-3.95884	4391	4686	3714	4306
ATR	0.0738418	5.54381	1.12132	0.27626	0.608208	-6.29405	1202	1242	1312	1223
ATRAID	0.0801038	5.47953	1.21219	0.240443	0.570152	-6.17493	1139	1193	1208	1221
ATRIP	0.313186	4.96402	3.97609	0.00082252	0.0251267	-0.840777	751	754	968	875
ATRN	0.194766	6.20035	3.59166	0.00196961	0.0451942	-1.96788	1769	1927	2131	2037
ATRX	0.245077	6.39636	4.62525	0.000189009	0.00888599	0.312622	1979	2182	2400	2459
ATXN1	-0.0585383	0.463396	-0.163836	0.871608	0.958475	-5.3898	41	34	27	46
ATXN10	-8.41505e-05	6.5757	-0.00168752	0.998671	0.999392	-7.1849	2420	2712	2557	2497
ATXN1L	0.204818	5.77458	3.1308	0.00555172	0.0849854	-2.87552	1334	1406	1498	1617
ATXN2	-0.0750256	6.00095	-1.17121	0.256135	0.587174	-6.3536	1803	1732	1662	1640
ATXN2L	0.0379355	8.13711	0.872953	0.393694	0.711884	-7.0769	7446	7489	7868	7251
ATXN3	0.171744	3.14942	1.15419	0.262874	0.593295	-5.55233	224	225	286	216
ATXN7	0.0299669	4.47023	0.332092	0.743491	0.904351	-6.57864	590	589	624	562
ATXN7L1	-0.0944073	2.72689	-0.593778	0.559733	0.813692	-5.88639	165	203	167	172
ATXN7L2	-0.134845	4.5722	-1.58946	0.12862	0.439887	-5.43936	640	700	630	573
ATXN7L3	-0.00239759	6.69823	-0.0488872	0.961524	0.986491	-7.21106	2621	2972	2775	2723
ATXN7L3B	0.0652493	7.31094	1.52428	0.144074	0.459668	-6.18999	3946	4406	4337	4269
AUH	-0.0412823	3.59311	-0.328104	0.746457	0.90545	-6.29742	284	378	307	324
AUNIP	-0.0311372	4.24688	-0.336289	0.740375	0.903583	-6.50639	499	532	500	494
AUP1	-0.00097796	7.79702	-0.0238444	0.981228	0.993864	-7.42094	5790	6172	6118	5667
AURKA	0.0299885	7.16824	0.689424	0.498972	0.778547	-7.06478	3664	3991	3906	3794
AURKAIP1	-0.0559853	7.2908	-1.26861	0.220054	0.550742	-6.52493	4060	4529	4030	4108
AURKB	-0.0145114	6.16135	-0.246245	0.808159	0.930608	-7.05449	1766	2111	1906	1869
AUTS2	0.236568	2.27671	1.28488	0.214429	0.544076	-5.14251	115	124	133	145
AVEN	0.0326427	4.42979	0.363334	0.720406	0.894483	-6.55481	545	600	558	597
AVIL	-0.120396	2.10262	-0.612945	0.547251	0.806935	-5.67805	123	117	107	110
AVL9	0.0748108	7.0081	1.60142	0.125941	0.436123	-6.01877	3152	3600	3587	3415
AVPI1	-0.543829	1.90932	-2.59867	0.0177265	0.163138	-3.07158	116	127	86	78
AXIN1	0.0490651	6.50816	0.956316	0.351041	0.674329	-6.70199	2357	2453	2463	2440
AXL	-0.742193	3.64643	-6.36741	4.34931e-06	0.000520005	4.41447	429	441	266	246
AZI1	-0.0975746	4.94131	-1.26165	0.222492	0.552349	-5.98018	853	855	804	768
AZI2	0.0412878	4.9936	0.522883	0.60716	0.838297	-6.64741	830	858	915	799
AZIN1	0.0777993	7.32829	1.77133	0.0927052	0.379607	-5.82054	3936	4485	4483	4268
B2M	-0.0893454	7.91761	-2.32884	0.0311746	0.219069	-4.93901	6456	6954	6261	6158
B3GALNT2	0.155193	4.60921	1.8108	0.086171	0.368425	-5.11319	565	681	688	677
B3GALT6	0.0871373	5.30335	1.14794	0.26538	0.595894	-6.20476	1059	1002	1113	1041
B3GALTL	0.176233	3.14945	1.23099	0.233495	0.563143	-5.46642	202	247	232	269
B3GAT3	-0.00725033	5.83197	-0.121738	0.904397	0.968878	-6.99452	1459	1612	1512	1498
B3GNT1	0.240603	4.36048	2.64824	0.0159473	0.15402	-3.52749	468	549	601	582
B3GNT2	-0.309071	4.87643	-3.95004	0.00087272	0.0261986	-0.879065	869	888	720	677
B3GNT4	-0.716112	0.489287	-2.11453	0.0480505	0.276932	-3.74756	43	53	24	34
B3GNT5	0.127157	4.08009	1.26597	0.220977	0.551224	-5.71905	423	446	452	484
B3GNT9	0.460502	0.205672	1.26153	0.222534	0.552349	-4.7236	24	28	43	29
B3GNTL1	-0.196015	3.72221	-1.76087	0.0945071	0.383158	-4.92661	361	398	342	311
B4GALNT1	0.166798	3.15768	1.24559	0.228203	0.55908	-5.4523	217	235	255	245
B4GALNT4	-0.143911	4.75366	-1.78602	0.0902246	0.375639	-5.19319	709	817	702	658
B4GALT1	-0.266684	5.52914	-3.84626	0.00110501	0.0298739	-1.2499	1365	1358	1165	1065
B4GALT2	0.0917447	6.2403	1.66701	0.112072	0.412909	-5.75035	1860	2080	2144	1993
B4GALT3	0.0794923	6.23584	1.46061	0.160623	0.482224	-6.04777	1851	2094	2063	2042
B4GALT4	0.175414	3.42032	1.35786	0.190571	0.516822	-5.39985	242	301	324	280
B4GALT5	0.00352413	6.66729	0.0727431	0.942778	0.981435	-7.20272	2608	2851	2713	2678
B4GALT6	0.407955	2.13541	2.04852	0.0547223	0.295929	-4.0428	87	119	140	128
B4GALT7	0.233307	4.68523	2.83779	0.0105894	0.122694	-3.23296	634	641	748	728
B9D1	-0.25913	2.375	-1.40266	0.177004	0.502386	-5.02867	145	159	112	140
B9D2	0.091464	2.73464	0.57753	0.57043	0.820054	-5.8984	175	171	191	172
BABAM1	0.0055153	5.42727	0.0709741	0.944167	0.981606	-6.8967	1147	1162	1252	1039
BACE1	0.0714876	3.37076	0.549902	0.588856	0.829037	-6.12517	260	282	308	255
BACH1	-0.138582	6.0406	-2.38002	0.0280534	0.208163	-4.46956	1740	1977	1723	1603
BACH2	0.0750613	2.88079	0.437529	0.666709	0.869285	-6.0163	178	207	169	237
BAD	-0.210706	2.77304	-1.30641	0.207159	0.536994	-5.26092	175	221	158	179
BAG1	-0.0944849	6.32765	-1.69613	0.106345	0.404193	-5.72653	2071	2397	2033	2087
BAG2	0.258155	6.59234	5.22025	5.02568e-05	0.00342831	1.60365	2250	2496	2824	2767
BAG3	0.00528575	5.76382	0.0852614	0.932954	0.978289	-6.98098	1440	1475	1461	1421
BAG4	0.170051	5.47203	2.38345	0.0278549	0.207923	-4.32536	1037	1217	1326	1173
BAG5	0.0784422	5.78223	1.28412	0.214688	0.544248	-6.16432	1361	1520	1546	1451
BAG6	-0.0263207	9.01157	-0.785212	0.442106	0.742008	-7.25598	13455	14555	13804	13296
BAGE2	0.168275	4.33397	1.84273	0.0811839	0.358629	-4.981	507	515	568	563
BAHD1	-0.170731	6.15283	-2.74155	0.0130485	0.137788	-3.78074	1837	2234	1751	1805
BAI3	0.357603	-0.11954	0.84348	0.409556	0.722021	-5.00284	14	32	24	31
BAIAP2	-0.311146	5.1154	-3.90483	0.000967229	0.0277159	-1.03097	1066	1011	853	794
BAIAP2-AS1	-0.7084	3.97077	-6.88328	1.52842e-06	0.00023041	5.42146	516	561	332	317
BAIAP2L1	-0.198848	5.28415	-2.58388	0.0182927	0.16571	-3.89136	1120	1123	914	1014
BAIAP2L2	0.180683	0.376658	0.496358	0.625391	0.849079	-5.27921	42	25	34	38
BAIAP3	-0.0258139	1.99113	-0.127565	0.899847	0.967314	-5.81463	99	116	102	106
BAK1	0.115328	5.12649	1.33468	0.197911	0.526737	-5.93778	920	884	896	1033
BAMBI	0.118061	5.96006	1.98245	0.0622254	0.313478	-5.17133	1547	1665	1683	1753
BANF1	0.0399392	7.39118	0.939436	0.359413	0.683022	-6.90111	4193	4716	4539	4480
BANP	-0.0667645	4.49326	-0.732425	0.472936	0.762689	-6.36869	631	608	572	592
BAP1	0.0141693	6.90695	0.272229	0.788411	0.921913	-7.21858	3047	3378	3405	2996
BARD1	0.174591	4.26861	1.67534	0.110409	0.410967	-5.22174	426	555	581	507
BATF2	-0.6258	1.63095	-2.51449	0.0211854	0.176787	-3.18879	117	91	61	70
BAX	-0.0936309	5.92089	-1.60244	0.125715	0.435994	-5.76791	1637	1727	1575	1531
BAZ1A	0.120202	6.51645	2.16249	0.0436754	0.263821	-4.98612	2146	2589	2570	2490
BAZ1B	0.0546439	7.92609	1.39398	0.179572	0.505068	-6.46987	6246	6583	6579	6551
BAZ2A	-0.165277	7.43711	-3.58734	0.00198897	0.045445	-2.22463	4860	5003	4244	4426
BAZ2B	0.0532151	4.88243	0.649589	0.52381	0.793265	-6.54147	706	855	837	757
BBC3	-0.519203	2.97658	-3.46998	0.00259375	0.0538169	-1.52178	224	284	172	176
BBIP1	0.193075	3.11502	1.41847	0.172406	0.496531	-5.22695	205	230	248	242
BBS1	0.197452	0.413947	0.565177	0.578631	0.82418	-5.25698	27	40	45	31
BBS10	0.140592	4.34721	1.47821	0.155899	0.478256	-5.5288	524	518	601	531
BBS12	-0.141662	3.10166	-0.953391	0.352482	0.675811	-5.73805	218	267	196	239
BBS2	0.0988305	3.31498	0.730968	0.473805	0.763294	-5.9912	223	297	281	265
BBS4	0.0283637	5.00182	0.336685	0.740081	0.903583	-6.73196	864	841	810	905
BBS5	-0.130484	3.1814	-0.944282	0.356995	0.680667	-5.77244	231	280	247	213
BBS7	0.104314	3.81518	0.975351	0.341761	0.666925	-5.94929	356	373	390	382
BBS9	0.346403	1.95884	1.57745	0.131358	0.443756	-4.69357	82	103	101	133
BBX	0.23118	5.16465	3.21146	0.00463768	0.0764803	-2.56369	881	898	1039	1018
BCAM	-0.15373	3.54719	-1.1249	0.274779	0.606833	-5.71144	367	300	306	279
BCAN	-0.0886477	3.20059	-0.661705	0.516184	0.78905	-6.00053	256	253	242	229
BCAP29	-0.00330213	6.11299	-0.0581856	0.954214	0.984101	-7.07232	1736	1994	1867	1797
BCAP31	0.0419379	7.59617	0.983407	0.337886	0.664135	-6.8947	4994	5257	5133	5268
BCAR1	0.059134	5.51572	0.906212	0.376284	0.695176	-6.50249	1134	1277	1234	1240
BCAR3	-0.330744	0.296744	-0.826082	0.419111	0.727217	-5.08635	31	43	45	18
BCAS2	0.145672	6.26887	2.56989	0.0188442	0.167855	-4.15422	1809	2141	2163	2136
BCAS3	0.155223	3.01515	1.09768	0.286195	0.619021	-5.56947	201	210	233	218
BCAT1	0.0615197	7.85282	1.40288	0.176941	0.502386	-6.44745	5644	6546	6531	5994
BCAT2	-0.0626566	5.6169	-0.934937	0.361667	0.685146	-6.50148	1308	1387	1226	1319
BCCIP	-0.0152011	6.73866	-0.319201	0.753091	0.90827	-7.16789	2766	3007	2860	2768
BCDIN3D	0.100024	2.37159	0.567706	0.576947	0.823134	-5.78861	126	142	144	139
BCDIN3D-AS1	0.315119	0.134089	0.789838	0.439464	0.739793	-5.07994	26	26	46	22
BCKDHB	0.0548192	4.84602	0.70624	0.488693	0.772034	-6.49255	725	792	806	747
BCKDK	0.140128	5.26767	2.01848	0.058027	0.304493	-4.94009	968	1004	1083	1058
BCL10	-0.210272	3.28732	-1.60661	0.124793	0.434481	-5.02366	270	294	258	223
BCL2	0.21797	2.74256	1.37227	0.186119	0.512159	-5.17215	171	162	187	194
BCL2L1	-0.220638	7.30257	-5.13401	6.07748e-05	0.00397587	1.28374	4329	4840	3907	3842
BCL2L11	0.299395	6.84955	6.04899	8.44086e-06	0.000860781	3.36027	2677	2914	3553	3231
BCL2L12	-0.0545136	6.55355	-1.04514	0.309201	0.639441	-6.62393	2405	2748	2532	2355
BCL2L13	0.0528397	7.09541	1.17656	0.254044	0.584438	-6.59614	3403	3822	3764	3617
BCL2L2	0.0585824	4.6115	0.685677	0.501279	0.779662	-6.43858	616	671	637	685
BCL3	-0.999284	0.984654	-3.41884	0.00291108	0.0575125	-1.6622	80	70	37	36
BCL6	-0.404862	1.72708	-1.77716	0.0917134	0.377946	-4.36652	89	116	72	80
BCL6B	-0.0255387	1.81118	-0.11575	0.909077	0.971166	-5.75866	101	89	89	94
BCL7A	0.0639006	5.78608	1.01615	0.322447	0.649909	-6.46563	1341	1565	1486	1504
BCL7B	-0.119429	5.47922	-1.75801	0.0950042	0.384199	-5.42113	1237	1262	1179	1088
BCL7C	-0.348285	4.51549	-3.93988	0.000893113	0.0265806	-0.819719	633	757	541	533
BCL9	-0.047489	4.33718	-0.460392	0.650512	0.861778	-6.48454	475	638	544	511
BCL9L	-0.669104	3.6081	-5.57203	2.33388e-05	0.00193824	2.82909	417	409	251	260
BCLAF1	0.109986	8.71371	3.07229	0.00632243	0.0922464	-3.52558	10336	11406	11918	11201
BCOR	0.0543786	8.00022	1.36181	0.189342	0.515422	-6.5224	6649	6856	6949	6871
BCORL1	-0.0787823	4.8628	-0.901163	0.378893	0.697117	-6.3397	705	912	777	725
BCR	0.00924397	7.48511	0.194534	0.847843	0.948422	-7.35048	4727	4871	4615	4910
BCS1L	0.00328413	6.10237	0.0542835	0.957282	0.984718	-7.06989	1863	1827	1854	1787
BDH2	0.036369	2.98637	0.251622	0.804061	0.929294	-6.11551	202	218	227	198
BDP1	0.189972	6.85003	4.02466	0.000736529	0.0234287	-1.1342	2761	3049	3357	3173
BECN1	0.064545	5.58436	0.926328	0.366007	0.688572	-6.50134	1280	1243	1350	1248
BEGAIN	0.00268468	1.35417	0.0104232	0.991793	0.996955	-5.62873	57	81	70	65
BEND3	0.124825	5.07153	1.61976	0.121924	0.428961	-5.53188	810	922	894	968
BEND3P3	0.21677	1.04724	0.746235	0.464748	0.757058	-5.29918	44	59	70	49
BEND6	-0.109351	1.44996	-0.414556	0.683155	0.876542	-5.57668	58	98	71	68
BEND7	0.128758	4.03563	1.29471	0.211087	0.540639	-5.67036	397	446	463	445
BET1	0.157731	4.46076	1.8195	0.0847872	0.365561	-5.05585	544	576	616	615
BET1L	-0.0169002	6.10876	-0.300071	0.767414	0.913663	-7.02603	1827	1904	1822	1811
BEX2	-0.251143	2.91591	-1.69064	0.107407	0.406335	-4.79129	200	243	186	180
BEX4	-0.0254936	7.26885	-0.58781	0.563649	0.815997	-7.15095	4067	4297	4064	4033
BFAR	-0.00871538	6.2952	-0.163681	0.871728	0.958475	-7.10498	2044	2191	2129	2019
BHLHB9	0.087739	2.75944	0.534894	0.598989	0.834442	-5.92976	191	163	189	179
BHLHE40	-0.347937	6.62253	-6.46917	3.52864e-06	0.00044089	4.28439	2969	3007	2414	2214
BICD1	0.168766	4.66567	1.92784	0.0691085	0.330157	-4.93842	573	719	731	696
BICD2	0.207578	6.13559	3.71791	0.00147914	0.0370962	-1.67232	1714	1803	2054	1948
BID	0.048217	5.20929	0.687366	0.500239	0.779267	-6.60141	936	1020	1028	965
BIN1	-0.215349	3.16797	-1.57536	0.13184	0.444238	-5.03142	251	269	238	204
BIN3	-0.106222	4.13396	-1.00552	0.327403	0.654248	-6.02046	486	492	415	483
BIRC2	-0.00235881	5.57074	-0.0349856	0.97246	0.990456	-6.93494	1172	1391	1301	1217
BIRC5	0.0655008	6.31195	1.00475	0.327768	0.65462	-6.60864	1903	2285	2328	1992
BIRC6	0.146213	7.66709	3.57684	0.00203688	0.0462348	-2.28555	4933	5461	5841	5492
BIVM	0.0902123	4.56672	1.07308	0.296806	0.630012	-6.08657	605	629	653	641
BLCAP	-0.0531511	5.54658	-0.829773	0.417072	0.726642	-6.57669	1236	1323	1221	1209
BLM	-0.0267029	6.41738	-0.518963	0.609838	0.839962	-7.00824	2204	2436	2287	2200
BLMH	0.0271356	7.41865	0.64264	0.528213	0.794956	-7.14421	4373	4742	4712	4441
BLOC1S1	-0.180396	2.53991	-0.858883	0.401216	0.716794	-5.64093	185	150	184	112
BLOC1S2	-0.0667785	4.65785	-0.793268	0.437512	0.738586	-6.37216	667	721	630	677
BLOC1S3	-0.0550591	4.53808	-0.652113	0.522216	0.792243	-6.43868	602	671	607	600
BLOC1S4	0.0224189	5.61921	0.33628	0.740381	0.903583	-6.88906	1274	1348	1391	1236
BLOC1S5	0.205855	5.11555	2.66939	0.0152409	0.150302	-3.68146	786	954	969	1005
BLOC1S6	0.159737	6.71975	2.81627	0.0110973	0.126465	-3.75383	2447	2928	2862	3047
BLVRA	-0.225871	5.70988	-3.52299	0.0023009	0.0499392	-2.00731	1405	1643	1280	1285
BLVRB	-0.168454	7.6798	-3.75674	0.00135429	0.0345269	-1.88454	5520	6175	4973	5281
BLZF1	0.110068	5.04578	1.23392	0.232426	0.562273	-6.04076	735	988	891	930
BMF	-0.576119	1.85398	-2.59289	0.0179456	0.164066	-3.07539	103	135	87	70
BMI1	0.0051058	6.42039	0.0985444	0.922542	0.975685	-7.1439	2183	2416	2336	2211
BMP1	-0.0280274	4.55388	-0.316665	0.754985	0.909125	-6.60971	577	701	609	624
BMP2K	0.272843	6.03594	4.83431	0.00011827	0.0062132	0.856335	1548	1661	1929	1891
BMP8B	-0.142844	1.40248	-0.566391	0.577823	0.82362	-5.4953	80	69	66	66
BMPR1A	-0.0683825	4.68606	-0.837823	0.412648	0.723882	-6.34415	663	755	687	645
BMPR2	0.164211	4.94008	2.03392	0.056307	0.299964	-4.83238	751	808	928	797
BMS1	0.0788288	7.49194	1.70543	0.104571	0.400714	-5.95333	4705	4710	4863	4934
BMS1P1	-0.551855	1.44416	-2.05118	0.0544389	0.295734	-3.91502	83	93	46	76
BMS1P17	-0.124368	-0.137226	-0.307349	0.761954	0.912174	-5.23566	20	31	19	27
BMS1P18	0.0688864	2.25763	0.334146	0.741966	0.903756	-5.85464	114	137	159	105
BMS1P20	0.768264	0.387514	2.14279	0.045427	0.269128	-3.70725	25	28	57	35
BMS1P4	0.213761	2.3806	1.08694	0.290792	0.62353	-5.38577	143	118	170	128
BMS1P5	-0.146056	2.64787	-0.814532	0.425531	0.729144	-5.71035	169	185	190	130
BMS1P8	-0.198367	1.9981	-0.969843	0.344429	0.669125	-5.38256	102	128	96	101
BMX	0.192215	1.02125	0.665439	0.513846	0.787382	-5.34248	43	59	51	64
BNIP1	-0.118719	3.709	-1.02069	0.320348	0.648504	-5.87116	325	410	332	333
BNIP2	0.0174106	6.12403	0.297067	0.769671	0.914661	-7.03085	1761	1969	1960	1762
BNIP3	-0.0459155	4.45419	-0.447957	0.6593	0.866367	-6.5272	518	687	545	601
BNIP3L	-0.0555921	5.80415	-0.921916	0.368245	0.690627	-6.56098	1487	1575	1486	1417
BOD1	0.229889	4.27071	2.29604	0.0333412	0.22835	-4.17707	499	460	544	561
BOD1L1	0.147912	6.3166	2.57199	0.0187604	0.167529	-4.16114	2052	2019	2229	2212
BOK	-0.170937	3.87053	-1.60639	0.124843	0.434481	-5.20244	384	451	370	360
BOLA1	-0.190606	3.05076	-1.25998	0.223083	0.553123	-5.40122	215	261	185	228
BOLA2B	-1.18985	0.104366	-2.86624	0.00995195	0.118883	-2.70919	35	53	28	12
BOLA3	-0.0499122	5.12253	-0.627558	0.537836	0.80137	-6.61924	938	966	855	961
BOLA3-AS1	-0.0408699	3.59391	-0.294491	0.771608	0.915405	-6.30829	341	317	275	360
BOP1	-0.240192	5.15762	-2.24524	0.0369731	0.241883	-4.50826	1033	1050	741	1021
BORA	0.0718	4.07534	0.700184	0.492381	0.774972	-6.26015	440	443	439	476
BPGM	-0.118871	4.62938	-1.44357	0.165306	0.487481	-5.66024	652	735	641	617
BPHL	-0.167051	3.52439	-1.39496	0.17928	0.504614	-5.38512	307	348	279	296
BPNT1	-0.0439085	5.91219	-0.740499	0.468139	0.760259	-6.74049	1577	1710	1551	1591
BPTF	0.0820565	7.70579	1.97816	0.0627435	0.315286	-5.54248	5373	5534	5749	5628
BRAF	0.0898851	4.94955	1.09055	0.289242	0.622581	-6.1774	796	814	914	778
BRAP	-0.036287	5.79081	-0.584235	0.566002	0.817015	-6.81503	1461	1552	1419	1477
BRAT1	-0.0480601	7.16145	-1.05391	0.305271	0.636548	-6.74367	3687	4145	3690	3771
BRCA1	0.0358024	6.94962	0.775896	0.447455	0.745167	-6.95575	3095	3474	3374	3258
BRCA2	0.0830728	5.07396	1.14768	0.265486	0.595894	-6.14743	849	910	941	895
BRCC3	0.207414	4.55049	2.37234	0.0285024	0.210154	-4.11443	568	604	709	626
BRD1	0.0300296	5.29701	0.434007	0.66922	0.870199	-6.76892	1009	1082	1038	1066
BRD2	0.017043	8.41099	0.454282	0.654823	0.863405	-7.39594	8928	9260	9180	8958
BRD3	-0.0102274	5.12958	-0.143443	0.887466	0.963993	-6.81329	914	974	927	920
BRD4	-0.0166007	7.47308	-0.374231	0.712417	0.890959	-7.29493	4693	4912	4597	4762
BRD7	0.08354	6.64492	1.58043	0.130675	0.442681	-5.97257	2540	2687	2880	2583
BRD8	0.0109218	7.13857	0.233128	0.818179	0.935183	-7.27651	3741	3804	3747	3743
BRD9	-0.0602421	6.70917	-1.19729	0.246064	0.576365	-6.4911	2840	2903	2775	2652
BRE	-0.0615192	4.06883	-0.572351	0.573861	0.821501	-6.33982	406	520	461	411
BRF1	-0.0626415	5.07501	-0.779374	0.445453	0.743702	-6.49884	873	979	821	930
BRF2	0.0108754	4.2585	0.109873	0.913674	0.97258	-6.56223	456	573	530	489
BRI3	-0.236406	3.23849	-1.80389	0.0872858	0.371206	-4.7151	265	285	240	220
BRI3BP	0.174921	6.44705	3.37249	0.00323151	0.06157	-2.50617	2078	2340	2456	2456
BRICD5	-0.06294	1.79623	-0.285926	0.778059	0.91814	-5.72148	92	98	100	80
BRINP3	0.627767	2.1638	2.78678	0.0118314	0.130437	-2.76005	113	83	174	123
BRIP1	0.104169	5.28845	1.43148	0.168696	0.492556	-5.85163	970	1057	1146	1004
BRIX1	0.155241	6.47331	2.93183	0.00862024	0.109565	-3.45979	2098	2436	2538	2432
BRK1	-0.00852283	7.21861	-0.173838	0.863849	0.955285	-7.30491	3845	4187	3790	4084
BRMS1	0.134682	5.8277	2.15769	0.0440963	0.265029	-4.83042	1442	1471	1555	1596
BRMS1L	0.0688495	2.85323	0.423051	0.677055	0.87458	-6.01338	193	186	224	170
BROX	-0.00546729	6.01668	-0.0824136	0.935188	0.978717	-7.04611	1586	1912	1828	1604
BRPF1	0.0396515	6.44577	0.776525	0.447093	0.744832	-6.84436	2224	2399	2391	2291
BRPF3	0.040593	6.96968	0.853768	0.403974	0.718605	-6.8957	3205	3439	3309	3426
BRSK1	-0.267063	2.46617	-1.42358	0.170942	0.494845	-5.0279	133	197	140	127
BRSK2	-0.0591372	0.390378	-0.168993	0.867606	0.956913	-5.37258	29	43	29	39
BRWD1	0.072866	6.49722	1.44708	0.164331	0.486366	-6.12778	2278	2458	2498	2410
BRWD3	-0.00375793	5.5216	-0.05848	0.953983	0.984101	-6.92136	1183	1290	1233	1197
BSCL2	0.292819	1.57766	1.25971	0.223177	0.553214	-4.98272	70	74	87	87
BSDC1	-0.181002	6.41476	-3.48681	0.00249701	0.0526307	-2.24724	2341	2544	2187	2059
BSG	-0.0959639	9.91728	-2.85213	0.0102634	0.120876	-4.11604	26315	27416	24549	25003
BSN	-0.069696	4.87912	-0.894193	0.382516	0.700541	-6.35055	748	875	771	751
BST2	-0.0840568	6.24727	-1.38155	0.183298	0.508433	-6.15652	1898	2321	1945	1967
BTAF1	0.0330787	6.85595	0.630633	0.535866	0.79998	-7.04033	3095	3061	3074	3130
BTBD1	0.0741294	6.9563	1.59625	0.127093	0.438137	-6.01568	3157	3350	3474	3277
BTBD10	0.161791	3.96375	1.5822	0.13027	0.441848	-5.26598	372	421	450	424
BTBD2	0.0140962	5.42138	0.213375	0.83333	0.941928	-6.87414	1091	1202	1147	1134
BTBD3	0.0402253	5.24266	0.565264	0.578573	0.82418	-6.68786	931	1079	1050	985
BTBD7	0.122142	5.00843	1.61107	0.123813	0.432645	-5.52873	828	830	893	884
BTBD9	0.0691065	4.73254	0.776963	0.44684	0.744773	-6.40728	686	708	673	772
BTD	-0.0250188	3.55978	-0.190322	0.851096	0.949966	-6.32269	348	294	303	314
BTF3	-0.0575885	9.25437	-1.68345	0.108808	0.408449	-6.21514	15941	17574	15715	16006
BTF3L4	-0.0369458	5.94864	-0.626739	0.538362	0.801992	-6.8291	1576	1790	1610	1621
BTF3L4P2	0.334952	1.74097	1.51573	0.14621	0.463493	-4.72127	77	82	96	102
BTG1	0.253977	6.29671	4.47817	0.000263323	0.0113417	0.0022767	1833	2040	2400	2154
BTG2	-0.344944	5.60896	-5.46593	2.93715e-05	0.00232773	2.33445	1405	1553	1166	1128
BTG3	0.15178	3.95675	1.45609	0.161854	0.483575	-5.43887	361	432	434	433
BTK	-0.0888437	6.06564	-1.55821	0.135845	0.44875	-5.86862	1816	1897	1765	1675
BTN2A1	0.0953909	5.39352	1.35408	0.191754	0.518453	-5.97925	995	1197	1170	1133
BTN2A2	0.067931	3.84104	0.608879	0.549887	0.808626	-6.24515	335	420	405	373
BTN2A3P	-0.0375156	2.17263	-0.19813	0.845069	0.947757	-5.86237	113	132	120	115
BTN3A1	-0.0387099	2.5023	-0.220794	0.827632	0.939468	-5.9634	149	159	166	131
BTN3A2	0.256306	3.38454	2.03201	0.0565171	0.300066	-4.38929	254	259	318	286
BTNL9	0.0364666	4.24606	0.374395	0.712297	0.890959	-6.49239	454	556	530	489
BTRC	0.045104	5.53682	0.682971	0.502949	0.780247	-6.68669	1206	1250	1233	1264
BUB1	0.0717927	7.78546	1.68323	0.108851	0.408458	-6.03501	5712	5856	6201	5785
BUB1B	0.0965267	7.04657	1.83738	0.0820012	0.359783	-5.65943	3305	3571	3887	3371
BUB3	0.0376038	7.65894	0.910853	0.373896	0.69334	-6.97375	5030	5708	5548	5304
BUD13	-0.0211143	4.8972	-0.277885	0.784131	0.92084	-6.72247	786	827	792	774
BUD31	-0.0397047	5.18384	-0.540038	0.595506	0.832359	-6.68725	908	1077	944	956
BVES	0.759369	1.89019	3.53948	0.00221663	0.0487976	-1.32279	67	86	126	129
BX322557.10	0.0458758	3.44928	0.351475	0.729138	0.899176	-6.24142	273	304	268	322
BYSL	0.051048	6.85171	1.0395	0.311749	0.641637	-6.69519	2957	3144	3255	2977
BZRAP1	-0.287539	3.26337	-2.13535	0.0461044	0.271112	-4.17764	293	277	225	234
BZRAP1-AS1	-0.80808	0.431489	-2.34475	0.0301716	0.215363	-3.42437	44	51	22	32
BZW1	0.0660335	8.40849	1.66835	0.111804	0.412727	-6.14083	8299	9589	9505	8926
BZW1P2	0.0766163	2.12743	0.385166	0.704434	0.886857	-5.7951	114	114	133	105
BZW2	0.102854	7.25556	2.36976	0.0286547	0.210383	-4.75254	3757	4176	4297	4095
C10orf118	0.0972818	3.80423	0.867264	0.396725	0.713826	-6.04347	343	383	415	352
C10orf12	0.115849	3.7405	0.971104	0.343817	0.668234	-5.9294	337	352	338	401
C10orf128	-0.184894	6.92331	-3.9712	0.000831719	0.0251462	-1.26879	3380	3577	3090	2941
C10orf2	0.0803665	6.15455	1.45618	0.161829	0.483575	-6.03416	1792	1933	1997	1884
C10orf25	0.108122	0.73977	0.335426	0.741015	0.903583	-5.41799	51	36	41	50
C10orf32	0.0156057	3.51756	0.127321	0.900038	0.967345	-6.31884	291	321	331	280
C10orf35	0.249193	2.86114	1.62626	0.120528	0.42763	-4.86879	186	172	210	208
C10orf71	-0.0333228	2.56696	-0.184524	0.855577	0.95214	-5.99153	179	145	165	144
C10orf88	0.0733966	3.91708	0.711938	0.485239	0.770181	-6.20122	381	410	417	403
C11orf1	-0.0848765	3.91014	-0.777209	0.446699	0.744773	-6.15032	375	459	374	400
C11orf21	-0.338309	0.290207	-0.960645	0.348915	0.672648	-4.99078	38	35	25	32
C11orf24	0.117508	5.42713	1.59007	0.128481	0.439654	-5.66326	1118	1103	1265	1111
C11orf30	0.226635	4.69049	2.50624	0.0215563	0.178486	-3.89655	634	648	691	791
C11orf31	-0.0535474	5.76899	-0.857773	0.401814	0.717057	-6.60922	1436	1550	1387	1449
C11orf35	-0.0976556	2.16147	-0.502561	0.621105	0.847178	-5.75554	123	125	126	103
C11orf48	0.0180745	5.51461	0.238559	0.814027	0.933588	-6.89174	1138	1308	1337	1110
C11orf49	-0.0385145	4.17508	-0.384697	0.704776	0.887143	-6.46556	478	505	446	499
C11orf54	0.124357	4.61408	1.4827	0.154713	0.476401	-5.60283	587	675	701	654
C11orf57	0.0881738	6.16531	1.60612	0.124903	0.434481	-5.82349	1786	1957	1957	1963
C11orf58	0.0503479	8.02865	1.27773	0.216885	0.54631	-6.63289	6453	7363	7171	6912
C11orf63	0.206797	0.495841	0.607038	0.551082	0.809251	-5.2542	42	29	41	38
C11orf65	0.552707	0.783368	1.70672	0.104326	0.400361	-4.30855	27	52	56	54
C11orf68	-0.00965677	4.92692	-0.127888	0.899595	0.967314	-6.7621	798	842	803	802
C11orf73	0.0739397	4.95957	0.990314	0.334587	0.661212	-6.28258	769	862	860	831
C11orf74	0.323137	2.8191	2.02913	0.0568354	0.300629	-4.23697	178	161	199	218
C11orf80	-0.0809769	3.01441	-0.568901	0.576152	0.822615	-5.995	223	223	213	202
C11orf82	0.122349	4.75764	1.54687	0.138552	0.450854	-5.55438	661	733	767	728
C11orf83	-0.0104296	4.2128	-0.108915	0.914423	0.972874	-6.54762	484	516	517	462
C11orf84	-0.0309881	5.3542	-0.405098	0.689975	0.880314	-6.79579	1137	1087	1133	1011
C11orf95	-0.458577	4.90473	-5.77265	1.51645e-05	0.00137462	3.111	867	1024	670	684
C11orf96	0.168619	1.4944	0.644363	0.527119	0.794738	-5.47792	65	77	64	97
C12orf10	-0.229752	2.14087	-1.18219	0.251857	0.582555	-5.21666	129	127	115	100
C12orf23	-0.0052998	4.40335	-0.0550695	0.956664	0.984718	-6.61294	502	643	558	562
C12orf29	0.180554	5.14116	2.50501	0.0216122	0.178557	-4.01294	840	943	1031	960
C12orf4	0.132084	4.81941	1.6714	0.111193	0.412205	-5.389	707	742	769	796
C12orf43	0.00610284	5.12646	0.0843435	0.933674	0.978383	-6.81952	898	976	966	889
C12orf44	0.162226	4.17102	1.49122	0.152482	0.47253	-5.45687	396	525	483	529
C12orf45	-0.00412983	3.70551	-0.0329656	0.974049	0.990984	-6.38883	339	362	308	386
C12orf49	0.0972143	5.13002	1.3275	0.200229	0.529695	-5.94781	866	954	936	983
C12orf5	0.402957	2.05901	2.04007	0.0556344	0.298261	-4.0405	91	103	126	127
C12orf57	-0.245856	3.5211	-2.0611	0.0533901	0.292213	-4.3789	312	360	277	281
C12orf60	0.0130091	1.56944	0.0537084	0.957734	0.984718	-5.68989	68	91	72	86
C12orf65	0.00434227	4.78914	0.0550304	0.956694	0.984718	-6.7306	711	773	762	705
C12orf66	-0.0500695	3.85041	-0.42951	0.672431	0.871339	-6.34232	399	390	416	337
C12orf73	0.298558	4.32749	3.18322	0.00493959	0.0791042	-2.41825	452	522	624	557
C12orf75	0.0603321	2.00503	0.293161	0.772608	0.915525	-5.78569	111	100	114	102
C12orf76	-0.255962	3.54992	-2.1404	0.0456437	0.26949	-4.25025	339	348	274	293
C12orf79	-0.579092	0.482004	-1.62073	0.121716	0.428855	-4.37833	43	48	42	21
C14orf1	-0.137699	4.41338	-1.55161	0.137414	0.449984	-5.44623	561	641	536	540
C14orf119	-0.171072	4.79605	-1.87788	0.0759884	0.346558	-5.05664	838	750	695	689
C14orf142	-0.0220971	4.13925	-0.200015	0.843615	0.947325	-6.50945	408	554	453	475
C14orf159	-0.104198	4.46294	-1.15061	0.264307	0.594788	-5.97098	601	627	539	588
C14orf166	-0.00475594	6.13219	-0.0823403	0.935246	0.978717	-7.07533	1744	2040	1899	1813
C14orf2	-0.179345	6.16342	-2.53005	0.0205015	0.174225	-4.20778	2000	2098	1640	1941
C14orf28	-0.111979	0.703409	-0.365942	0.718491	0.894025	-5.39994	44	46	40	42
C14orf79	-0.0390632	2.94761	-0.263585	0.794965	0.925103	-6.09929	215	205	210	192
C14orf80	-0.194464	4.24961	-1.74763	0.0968311	0.387068	-5.10518	538	556	544	406
C14orf93	-0.179537	3.48319	-1.4488	0.163858	0.485655	-5.30185	289	352	293	264
C15orf26	-0.0596838	4.05753	-0.604324	0.552847	0.81034	-6.31718	443	470	431	432
C15orf27	-0.481269	0.61156	-1.50296	0.149449	0.46862	-4.52951	47	49	30	38
C15orf37	-0.306394	0.332178	-0.872762	0.393796	0.711941	-5.06169	42	33	32	27
C15orf39	0.0496991	5.93707	0.826311	0.418984	0.727217	-6.67886	1609	1628	1674	1626
C15orf40	0.0216181	4.55836	0.258217	0.799043	0.92688	-6.62852	597	660	634	623
C15orf41	0.142048	3.51715	1.18039	0.252555	0.583	-5.64171	291	294	311	325
C15orf57	-0.0875163	3.93659	-0.793493	0.437385	0.738586	-6.14592	441	408	386	399
C15orf61	-0.145483	3.25134	-1.0885	0.290123	0.622866	-5.65467	245	294	255	225
C15orf62	0.0226675	1.28704	0.0862595	0.932172	0.977892	-5.60652	71	59	66	63
C16orf13	0.0295458	5.5018	0.442771	0.66298	0.867359	-6.81643	1114	1301	1232	1194
C16orf45	-0.219241	0.838434	-0.743106	0.466596	0.758821	-5.25222	47	56	46	41
C16orf46	-0.408575	0.310575	-1.11203	0.280133	0.611837	-4.87269	29	49	24	33
C16orf52	-0.0142226	3.49204	-0.116847	0.908219	0.970641	-6.31151	289	318	284	309
C16orf58	-0.118668	5.26934	-1.63949	0.117725	0.422967	-5.55151	1033	1127	944	1018
C16orf59	-0.0414301	5.32027	-0.577662	0.570342	0.820054	-6.70006	1023	1157	1008	1080
C16orf62	0.0861353	5.41851	1.26564	0.221091	0.551224	-6.09602	1069	1163	1224	1112
C16orf70	-0.00712527	4.76751	-0.0881762	0.930668	0.97754	-6.72194	677	793	742	698
C16orf71	-0.378908	-0.3565	-0.728873	0.475055	0.763978	-5.03184	29	19	9	34
C16orf72	-0.0250216	5.93218	-0.431851	0.670758	0.870717	-6.93107	1600	1711	1620	1586
C16orf80	0.0660434	5.25628	0.904157	0.377344	0.69606	-6.43958	977	1031	1102	972
C16orf87	0.28068	3.9121	2.36397	0.0289996	0.211126	-3.94927	364	370	498	386
C16orf91	0.250536	5.0139	3.39418	0.00307746	0.059493	-2.13465	752	841	956	911
C16orf93	-0.187879	1.56419	-0.802426	0.432327	0.735005	-5.39344	78	91	76	70
C16orf95	-0.0976748	1.94947	-0.463526	0.648305	0.861193	-5.70617	106	108	111	87
C17orf103	0.00205409	2.89586	0.0132876	0.989538	0.996235	-6.11676	211	189	192	201
C17orf104	0.202247	0.494562	0.607533	0.550761	0.808916	-5.25364	31	39	46	34
C17orf51	0.041524	2.81112	0.271977	0.788602	0.921913	-6.05168	185	186	186	190
C17orf53	0.0385093	4.35415	0.423269	0.676898	0.874541	-6.5068	500	586	553	545
C17orf58	0.195651	4.95294	2.59686	0.0177951	0.163294	-3.78693	727	830	888	868
C17orf59	-0.11193	2.87385	-0.693796	0.496288	0.777478	-5.87104	189	220	165	211
C17orf62	-0.0278668	5.91295	-0.47194	0.642397	0.858572	-6.90739	1602	1668	1609	1551
C17orf67	0.0506634	1.27142	0.180304	0.858842	0.953065	-5.59074	72	56	78	53
C17orf70	-0.00664923	6.69716	-0.136504	0.892873	0.965933	-7.20231	2654	2940	2737	2748
C17orf72	-0.254363	1.75754	-1.10197	0.284372	0.617301	-5.1907	109	90	88	75
C17orf75	0.0147893	4.3956	0.166824	0.869289	0.957156	-6.5977	541	584	555	565
C17orf80	0.207121	5.42944	2.89547	0.00933573	0.115125	-3.29221	1059	1097	1309	1147
C17orf85	0.0179629	5.51419	0.27196	0.788615	0.921913	-6.88277	1178	1263	1196	1240
C17orf89	-0.0709256	5.473	-0.850814	0.405571	0.719167	-6.54045	1105	1349	1058	1248
C17orf96	-0.0303282	4.50488	-0.353631	0.727547	0.898357	-6.58174	577	657	605	585
C17orf99	-0.487967	1.30947	-1.8927	0.0738868	0.34229	-4.12886	80	77	59	51
C18orf21	0.0810136	4.52095	0.903124	0.377879	0.696359	-6.23796	547	655	608	644
C18orf25	0.12937	4.61034	1.5489	0.138063	0.450751	-5.50916	599	656	665	688
C18orf54	0.257712	3.4216	2.0393	0.055718	0.298591	-4.38763	240	287	299	322
C18orf56	-0.163771	2.89028	-1.08722	0.290672	0.62353	-5.54023	199	222	175	196
C18orf8	0.0685896	4.77342	0.788055	0.440481	0.74031	-6.41036	726	710	797	688
C19orf10	0.0257164	6.49996	0.500963	0.622207	0.847755	-7.03708	2336	2486	2401	2436
C19orf12	0.144097	4.46502	1.55749	0.136016	0.449044	-5.45361	505	628	606	625
C19orf24	-0.0416915	5.55118	-0.599836	0.555772	0.812052	-6.74466	1158	1407	1218	1232
C19orf25	-0.0320981	6.02186	-0.552017	0.587435	0.827949	-6.89293	1668	1866	1680	1725
C19orf26	-0.305948	3.34116	-2.40796	0.0264743	0.201943	-3.71047	297	308	251	231
C19orf40	-0.15078	3.44023	-1.23618	0.231604	0.561166	-5.55299	294	320	268	277
C19orf43	-0.082298	7.24436	-1.35235	0.192295	0.51886	-6.41069	4193	4191	3640	4184
C19orf44	0.0955092	3.64811	0.816369	0.424506	0.729008	-6.03559	323	328	328	358
C19orf47	0.0470432	5.22187	0.665448	0.51384	0.787382	-6.61968	974	999	1014	994
C19orf48	0.0317445	7.61611	0.788883	0.440009	0.73997	-7.07149	4961	5477	5306	5204
C19orf52	-0.078037	5.06748	-1.07289	0.296891	0.630012	-6.22674	873	980	884	845
C19orf53	-0.13768	6.29452	-2.51952	0.0209616	0.176199	-4.25956	2128	2298	1947	2018
C19orf54	0.0212246	5.32181	0.293997	0.771979	0.915405	-6.82788	1021	1114	1140	998
C19orf55	-0.089335	4.67921	-1.09986	0.28527	0.618285	-6.09148	692	728	675	640
C19orf57	0.050215	3.25992	0.356795	0.725216	0.897032	-6.17571	219	290	280	238
C19orf60	-0.176906	5.28061	-2.5623	0.0191499	0.168735	-3.93333	1049	1174	995	942
C19orf66	-0.300049	1.33842	-1.1877	0.24973	0.580591	-5.00096	71	79	64	56
C19orf68	-0.507895	0.904817	-1.56305	0.134706	0.447481	-4.50097	76	47	38	44
C19orf70	0.013552	5.23691	0.183722	0.856197	0.952253	-6.83384	944	1075	967	1042
C19orf71	-0.198391	2.23217	-1.0181	0.321543	0.649566	-5.40796	137	133	132	101
C19orf73	-0.345436	0.137935	-0.857155	0.402146	0.717176	-5.03724	26	41	18	36
C19orf81	-0.219503	2.62114	-1.33402	0.198121	0.527094	-5.18277	179	177	146	155
C19orf82	0.0725592	0.435454	0.217136	0.830439	0.9405	-5.37499	33	37	41	32
C19orf84	-0.00728702	0.797746	-0.0244456	0.980755	0.993783	-5.48082	42	51	47	44
C1D	0.0591806	5.09113	0.726982	0.476186	0.764526	-6.54296	791	1014	937	908
C1GALT1	0.119683	6.50968	2.22523	0.0385015	0.247212	-4.87003	2160	2550	2570	2465
C1GALT1C1	-0.0239023	2.93698	-0.159837	0.874713	0.959762	-6.11778	192	223	219	184
C1orf109	0.0709637	6.40263	1.31211	0.205268	0.535323	-6.28282	2090	2352	2400	2198
C1orf112	0.137676	5.70078	2.01566	0.0583468	0.304968	-5.04995	1249	1420	1552	1345
C1orf115	0.125271	3.3078	0.911675	0.373474	0.69303	-5.84352	273	238	284	262
C1orf116	-0.0907943	2.16643	-0.454676	0.654545	0.86333	-5.77918	125	123	102	129
C1orf122	-0.124709	5.27995	-1.65567	0.114373	0.416117	-5.52985	1049	1131	932	1042
C1orf123	0.0398373	5.28481	0.569283	0.575899	0.822615	-6.69612	1010	1056	1032	1061
C1orf131	0.0855272	5.20149	1.20748	0.24221	0.572842	-6.1114	930	990	1041	967
C1orf134	0.145054	1.70107	0.633348	0.53413	0.798777	-5.54339	73	93	84	97
C1orf159	-0.134444	5.41927	-2.03683	0.055988	0.299656	-4.94467	1159	1251	1092	1071
C1orf172	0.520315	0.311685	1.45901	0.161058	0.482513	-4.53994	24	31	33	46
C1orf174	0.00762294	5.3274	0.109979	0.91359	0.97258	-6.86793	1066	1086	1071	1060
C1orf192	0.0966262	3.23672	0.720361	0.480158	0.766668	-5.97284	241	248	245	271
C1orf198	0.281135	4.39538	3.14486	0.00538066	0.0832861	-2.51699	476	551	625	604
C1orf213	0.015638	2.4247	0.0868111	0.931739	0.977892	-5.95898	151	136	152	133
C1orf216	-0.0805594	5.54685	-1.22623	0.235239	0.565429	-6.17507	1198	1390	1217	1192
C1orf220	-0.459938	-0.059192	-1.15086	0.264208	0.59466	-4.7855	26	34	28	16
C1orf233	0.077685	3.7314	0.684435	0.502046	0.780154	-6.16075	315	381	354	369
C1orf27	0.116902	5.80304	1.8566	0.0790976	0.35353	-5.34295	1336	1551	1602	1481
C1orf35	-0.0459839	5.63727	-0.729041	0.474955	0.763978	-6.67894	1320	1398	1294	1300
C1orf43	0.0147959	7.46712	0.34126	0.73669	0.90234	-7.30623	4411	5067	4723	4702
C1orf50	-0.0161435	3.18935	-0.110346	0.913303	0.97258	-6.20992	206	292	243	238
C1orf52	0.107571	4.67645	1.31921	0.202931	0.532335	-5.83614	619	706	704	702
C1orf53	0.353305	0.304975	0.980706	0.339182	0.665196	-4.97846	35	24	40	33
C1orf56	-0.506222	0.325087	-1.45473	0.162226	0.483852	-4.54593	34	46	30	25
C1orf61	-0.485046	1.26601	-1.86293	0.0781609	0.351724	-4.16465	72	80	50	57
C1orf63	-0.245606	5.65347	-3.93591	0.000901212	0.0266079	-1.0768	1424	1522	1231	1217
C1orf74	0.194989	2.74721	1.22505	0.235672	0.565784	-5.34792	175	162	189	190
C1orf85	0.051763	4.88497	0.62499	0.539485	0.802387	-6.55813	803	758	800	791
C1orf86	-0.0341684	5.67157	-0.482681	0.634891	0.854651	-6.84031	1410	1364	1410	1259
C1QBP	0.00292201	8.40927	0.0803454	0.936811	0.979172	-7.5001	8636	9639	9136	8897
C1QTNF6	0.0478565	1.01594	0.17198	0.865289	0.955912	-5.52352	50	56	53	55
C1RL	-0.356823	3.53227	-2.55431	0.0194766	0.170344	-3.48469	328	375	232	316
C1RL-AS1	-0.241061	3.41618	-1.95546	0.0655466	0.322021	-4.52522	307	316	260	259
C20orf112	-1.04508	3.91481	-9.6507	1.02017e-08	6.15164e-06	10.054	576	588	281	274
C20orf194	0.0870481	3.30213	0.666023	0.51348	0.787337	-6.03182	245	269	290	249
C20orf196	-0.00592756	3.11571	-0.0417205	0.967161	0.989036	-6.19024	221	245	212	247
C20orf24	0.123222	4.90553	1.43533	0.16761	0.490471	-5.74901	676	877	845	814
C20orf27	-0.17095	6.46194	-3.36835	0.00326172	0.0620532	-2.51824	2420	2609	2230	2171
C20orf96	-0.226669	4.80908	-2.7658	0.012382	0.133678	-3.41138	761	871	731	644
C21orf119	0.335352	3.18415	2.33502	0.0307816	0.217589	-3.80268	188	249	257	285
C21orf2	0.168156	3.92335	1.51932	0.145309	0.46164	-5.34225	378	391	467	387
C21orf33	0.0317381	7.10579	0.717713	0.481752	0.767538	-7.03197	3482	3846	3749	3630
C21orf58	-0.0820097	5.35448	-1.1393	0.268878	0.599944	-6.22699	1094	1169	1127	983
C21orf59	0.113803	3.96149	1.09477	0.287435	0.620933	-5.87529	380	425	454	405
C21orf67	0.123239	2.79319	0.717166	0.482081	0.76788	-5.82897	152	207	171	215
C21orf90	-0.123391	4.32625	-1.33622	0.197415	0.526224	-5.70863	560	565	525	492
C21orf91	0.0363631	4.31893	0.402487	0.691862	0.881447	-6.50438	508	551	546	524
C22orf23	-0.304078	0.894881	-1.01351	0.323672	0.650812	-5.06475	53	57	37	52
C22orf29	0.114485	7.84753	2.87476	0.00976843	0.117758	-3.83623	5807	6093	6494	6203
C22orf34	0.0101159	3.68861	0.0895252	0.929611	0.977146	-6.37972	345	345	344	340
C22orf39	0.0879708	6.46308	1.66811	0.111853	0.412727	-5.80116	2263	2337	2482	2336
C22orf46	0.0845567	4.7002	1.04817	0.307839	0.638532	-6.15237	648	709	733	685
C2CD2	0.0587047	4.79317	0.679966	0.504807	0.780548	-6.49616	683	779	818	686
C2CD2L	-0.0942415	5.33756	-1.26282	0.222082	0.551972	-6.07929	1094	1152	1122	956
C2CD3	0.076978	5.46143	1.05999	0.302568	0.63474	-6.33903	1171	1136	1258	1139
C2CD4C	-0.459168	0.719618	-1.3987	0.178173	0.503243	-4.66019	39	67	34	40
C2CD5	0.124025	5.31388	1.81075	0.0861796	0.368425	-5.29725	960	1090	1116	1084
C2orf16	0.118152	0.49701	0.36346	0.720313	0.894483	-5.35315	33	39	40	37
C2orf27A	0.0585611	2.02059	0.283954	0.779547	0.918879	-5.79326	102	111	124	96
C2orf42	-0.277794	2.71286	-1.72731	0.100492	0.392849	-4.68007	191	196	148	167
C2orf43	0.142989	5.50907	2.21005	0.0396988	0.250835	-4.65777	1116	1214	1298	1237
C2orf44	0.210724	5.69642	3.25716	0.00418683	0.0716878	-2.58532	1188	1409	1507	1450
C2orf47	0.0263977	4.77587	0.337115	0.739762	0.903583	-6.66955	700	759	746	718
C2orf48	-0.152858	2.87441	-0.99593	0.331922	0.65895	-5.62513	202	213	203	166
C2orf49	0.0686361	5.12722	0.954052	0.352156	0.675712	-6.36093	899	935	968	927
C2orf68	-0.0725533	5.38518	-1.08231	0.292792	0.62569	-6.2965	1107	1197	1112	1047
C2orf69	0.132843	4.9382	1.73026	0.0999539	0.391745	-5.33055	767	806	833	867
C2orf76	-0.241809	1.94335	-1.0714	0.29754	0.63088	-5.27206	120	105	112	77
C2orf82	-0.512951	0.386138	-1.52398	0.144148	0.459668	-4.47812	39	44	28	29
C2orf88	0.0536794	6.75699	1.0148	0.323073	0.65032	-6.70002	2609	3114	3012	2831
C3	-0.122596	2.33201	-0.646219	0.525943	0.793894	-5.73007	125	158	145	112
C3AR1	-0.0937884	0.624075	-0.293591	0.772285	0.915424	-5.40172	46	39	37	41
C3orf17	-0.0747107	5.45926	-1.14093	0.268215	0.599111	-6.25121	1152	1276	1156	1115
C3orf18	-0.121448	1.64982	-0.524868	0.605805	0.837976	-5.58639	77	99	85	74
C3orf33	0.266061	2.95266	1.51016	0.147617	0.465612	-5.05595	173	207	278	181
C3orf38	-0.0493681	4.15926	-0.51742	0.610893	0.840443	-6.39938	461	516	474	456
C3orf52	-0.14889	3.11034	-1.07818	0.294586	0.627521	-5.61974	223	266	217	217
C3orf58	0.0706852	3.14023	0.522519	0.607408	0.838557	-6.0624	216	246	238	240
C3orf62	0.129486	3.62626	1.07751	0.294874	0.627874	-5.78742	281	356	359	326
C3orf67	-0.484384	1.98008	-2.36345	0.0290306	0.211241	-3.49117	122	128	94	82
C3orf70	0.1752	1.46133	0.663321	0.515171	0.788556	-5.45763	74	65	95	62
C3orf72	-0.236148	3.03249	-1.49357	0.151871	0.47235	-5.102	232	245	237	167
C3orf83	-0.0127415	1.07119	-0.0462907	0.963566	0.987659	-5.55029	50	63	56	54
C4orf21	0.103763	5.29988	1.38875	0.181133	0.506457	-5.91114	941	1106	1155	1013
C4orf27	0.0931619	4.66427	1.03812	0.312372	0.642106	-6.15207	595	729	744	647
C4orf29	0.0902505	4.87564	1.16765	0.257532	0.588344	-6.07268	748	781	829	775
C4orf3	-0.0519586	5.62932	-0.788181	0.44041	0.740279	-6.63151	1272	1439	1253	1324
C4orf32	0.0823509	5.24789	1.0551	0.304741	0.636418	-6.29101	881	1114	1073	1001
C4orf33	-0.0300576	3.93566	-0.267554	0.791954	0.923503	-6.4274	361	475	398	405
C4orf36	0.367452	2.03665	1.70628	0.10441	0.40046	-4.53639	83	112	143	106
C4orf46	0.207767	5.26632	3.00801	0.00728882	0.0995947	-3.01941	909	1017	1099	1092
C4orf48	-0.181232	4.30981	-1.89531	0.0735218	0.341485	-4.8878	576	559	485	500
C5orf15	-0.0298297	6.155	-0.54436	0.592588	0.831165	-6.93076	1865	2006	1907	1829
C5orf22	0.245387	5.5179	3.5441	0.0021936	0.0485216	-1.91792	1049	1217	1397	1250
C5orf24	0.160772	6.11635	2.67039	0.0152085	0.150125	-3.91698	1640	1893	2051	1841
C5orf28	0.0611453	3.96933	0.600257	0.555497	0.811993	-6.29152	389	435	421	426
C5orf30	0.163683	4.49162	1.7005	0.105508	0.402557	-5.25054	496	654	643	620
C5orf34	0.0823343	3.94674	0.737553	0.469886	0.761458	-6.19209	352	458	442	400
C5orf45	0.00299697	5.3207	0.0385348	0.969667	0.989647	-6.87176	1105	1043	1116	1003
C5orf51	0.216882	6.40712	3.98582	0.000804521	0.0246856	-1.13126	2015	2218	2366	2483
C5orf54	0.177313	1.79149	0.781001	0.444519	0.743334	-5.4736	82	92	85	111
C5orf55	0.126365	2.47764	0.68458	0.501956	0.780154	-5.75115	159	129	164	143
C5orf56	-0.178684	1.05598	-0.611129	0.548428	0.8077	-5.3812	48	72	60	44
C5orf66	0.0531775	2.3556	0.280493	0.78216	0.920086	-5.90204	148	123	147	128
C6orf1	-0.140033	3.62858	-1.20399	0.243522	0.573652	-5.65009	317	382	318	306
C6orf106	-0.0345052	7.5808	-0.838927	0.412043	0.723744	-7.02426	5048	5368	5006	5015
C6orf120	0.0651773	6.46374	1.23508	0.232003	0.561613	-6.39158	2168	2477	2470	2316
C6orf132	-0.0512961	0.803813	-0.171908	0.865345	0.955912	-5.46962	42	53	46	44
C6orf136	-0.159314	5.1788	-2.13298	0.0463226	0.27156	-4.71738	946	1116	953	865
C6orf141	0.250467	1.18251	0.942001	0.358132	0.681802	-5.18865	57	54	65	65
C6orf163	0.0388359	1.32158	0.151142	0.881472	0.961914	-5.60911	60	72	74	60
C6orf164	-0.0722136	0.258572	-0.20724	0.838049	0.944388	-5.33752	31	34	33	28
C6orf183	0.0162068	1.524	0.0671577	0.947165	0.982442	-5.67569	70	83	70	83
C6orf203	0.0905803	4.24494	0.961933	0.348285	0.672097	-6.0979	490	497	516	519
C6orf211	0.00709771	6.01099	0.101793	0.919998	0.974674	-7.0428	1569	1901	1856	1581
C6orf3	0.216419	0.923151	0.714467	0.48371	0.768979	-5.28982	50	44	65	44
C6orf47	-0.0332077	4.32245	-0.355472	0.72619	0.897561	-6.52379	495	595	524	524
C6orf48	-0.0184311	7.29326	-0.387511	0.702727	0.886454	-7.25667	4011	4481	4003	4260
C6ORF50	-0.0567723	-0.11867	-0.139112	0.89084	0.965273	-5.26871	19	32	29	19
C6orf52	0.245566	1.59603	1.04655	0.308569	0.639309	-5.2009	66	83	93	81
C6orf57	0.143136	1.86019	0.656159	0.519667	0.790617	-5.57717	80	106	95	107
C6orf62	0.0435711	7.76911	1.01783	0.32167	0.649566	-6.88792	5333	6244	5921	5816
C6orf89	0.019501	7.73567	0.495761	0.625805	0.849079	-7.28373	5474	5910	5765	5604
C7orf13	0.238541	3.23514	1.74154	0.0979164	0.388778	-4.80991	203	265	270	272
C7orf25	-0.204962	0.393875	-0.605419	0.552134	0.809847	-5.23324	39	36	35	29
C7orf26	-0.0189628	5.96285	-0.323479	0.749901	0.906588	-6.98135	1606	1770	1621	1662
C7orf31	0.0301574	3.04631	0.212252	0.834193	0.942519	-6.14494	198	242	228	214
C7orf34	-0.157474	0.210521	-0.441291	0.664032	0.867998	-5.26528	35	30	30	27
C7orf43	-0.309619	4.77152	-3.79461	0.00124265	0.0327438	-1.19955	780	855	690	611
C7orf49	-0.0180682	5.75058	-0.275661	0.785814	0.921567	-6.94177	1354	1563	1500	1339
C7orf50	-0.151509	6.20469	-2.76303	0.0124562	0.134127	-3.749	1968	2214	1856	1852
C7orf55	-0.0527578	0.59949	-0.166808	0.869301	0.957156	-5.42098	40	42	42	36
C7orf55-LUC7L2	0.110034	6.10837	1.88603	0.0748264	0.344544	-5.37039	1765	1805	1971	1826
C7orf60	0.0338259	2.51571	0.173744	0.863923	0.955285	-5.97695	117	194	151	156
C7orf63	0.186745	1.04776	0.557156	0.583989	0.826266	-5.40686	38	69	43	79
C7orf73	-0.0100788	5.77635	-0.163736	0.871685	0.958475	-6.97399	1388	1571	1438	1456
C8orf33	0.0775391	7.41971	1.84559	0.0807506	0.357581	-5.71716	4265	4701	4779	4542
C8orf37	-0.03709	2.56703	-0.215849	0.831428	0.940775	-5.98538	140	184	164	146
C8orf4	0.42088	3.32804	3.26409	0.00412236	0.0706711	-2.01237	236	230	313	301
C8orf44	8.97029e-05	3.16615	0.000563391	0.999556	0.999845	-6.20825	216	268	286	197
C8orf58	-0.042093	1.10552	-0.149515	0.882739	0.962119	-5.5503	48	70	52	60
C8orf59	0.0331653	3.83153	0.304702	0.763938	0.912521	-6.38301	357	399	367	396
C8orf76	0.116267	1.48952	0.471168	0.642938	0.85864	-5.56497	63	82	86	69
C8orf82	-0.11524	5.55707	-1.63269	0.119158	0.425163	-5.63221	1223	1414	1146	1254
C8orf88	-0.265316	2.6652	-1.56686	0.133813	0.446654	-4.89516	163	212	143	164
C9orf114	-0.0206856	6.36965	-0.397249	0.695654	0.883027	-7.05473	2122	2358	2210	2140
C9orf116	0.126502	1.79072	0.548536	0.589775	0.829871	-5.61675	101	78	92	98
C9orf117	0.101695	2.45618	0.588761	0.563025	0.815859	-5.80334	143	141	155	145
C9orf142	-0.0338699	5.49844	-0.477885	0.638238	0.856603	-6.79888	1167	1292	1127	1243
C9orf147	0.405708	0.340763	1.15707	0.261724	0.592317	-4.8387	34	25	39	37
C9orf156	0.215086	4.24035	2.25627	0.0361554	0.239448	-4.24134	433	511	533	546
C9orf16	-0.11015	6.27984	-1.99627	0.0605841	0.309981	-5.2252	2149	2190	2008	1952
C9orf163	-0.295124	0.671695	-0.866966	0.396884	0.713904	-5.13216	60	37	35	40
C9orf169	0.0378057	1.10575	0.136873	0.892585	0.965722	-5.55202	49	65	54	61
C9orf172	-0.159779	2.65899	-0.987507	0.335925	0.662292	-5.56563	162	197	160	156
C9orf173	0.0638075	0.818925	0.206421	0.83868	0.944843	-5.46769	36	58	50	45
C9orf3	0.109547	2.88918	0.741553	0.467515	0.759691	-5.84288	178	205	207	200
C9orf37	-0.148976	4.8456	-1.54403	0.139235	0.451229	-5.58221	784	842	645	811
C9orf40	0.0363354	4.86027	0.473891	0.641031	0.85815	-6.63624	734	808	799	759
C9orf41	0.140814	4.95998	1.55294	0.137097	0.449903	-5.60035	688	918	918	818
C9orf64	0.163221	5.06538	2.23818	0.0375062	0.244156	-4.49974	798	904	945	932
C9orf66	-0.631409	0.533421	-1.93576	0.0680703	0.328029	-3.9904	45	51	34	27
C9orf69	-0.0348974	6.31548	-0.654563	0.520672	0.790844	-6.9022	2117	2216	2098	2069
C9orf72	-0.0398411	3.72719	-0.353351	0.727753	0.898485	-6.33273	333	389	336	356
C9orf78	-0.05044	7.71084	-1.24387	0.228822	0.559471	-6.62789	5386	6089	5545	5365
C9orf85	-0.113559	3.2326	-0.869786	0.395379	0.713047	-5.85479	249	276	245	233
C9orf89	0.167166	2.90673	1.0455	0.309038	0.639441	-5.58775	209	173	205	214
C9orf9	-0.203677	1.59613	-0.86352	0.398727	0.71512	-5.35624	92	82	76	72
C9orf91	0.0730121	4.87101	0.947493	0.3554	0.678718	-6.29957	745	788	788	801
C9orf96	0.288426	0.736005	0.793544	0.437356	0.738586	-5.19688	60	27	45	51
CA11	-0.269745	2.80475	-1.55813	0.135864	0.44875	-4.94656	234	182	170	165
CA13	0.0171401	2.73823	0.102385	0.919534	0.97446	-6.05926	161	196	203	155
CA14	-0.274906	-0.0507341	-0.692078	0.497342	0.778074	-5.1027	33	24	27	19
CA2	-0.114733	1.27548	-0.418706	0.680172	0.875888	-5.52676	56	80	53	71
CA5B	0.00643543	1.77872	0.0290363	0.977141	0.992268	-5.75453	88	95	83	99
CA5BP1	0.0567885	4.65488	0.691988	0.497397	0.778074	-6.44745	647	680	675	685
CA8	0.0512983	5.64146	0.819838	0.422574	0.728598	-6.60893	1255	1382	1377	1315
CAAP1	0.0899115	4.21386	0.780311	0.444915	0.743527	-6.24488	472	495	590	434
CAB39	-0.0180257	7.93872	-0.424308	0.676154	0.874121	-7.34792	6178	7119	6723	6207
CAB39L	0.117849	3.16852	0.799505	0.433976	0.736452	-5.89111	234	229	222	276
CABIN1	-0.0165956	6.79395	-0.331782	0.743721	0.904351	-7.17569	2982	3017	2949	2893
CABLES1	0.208674	2.04191	1.04252	0.310385	0.640298	-5.32913	97	108	111	123
CABLES2	-0.356623	2.66521	-2.22969	0.0381555	0.246785	-3.85921	187	198	152	144
CACFD1	-0.374779	3.65973	-2.7556	0.0126582	0.134979	-3.12462	406	368	259	332
CACNA1H	-0.359066	2.34928	-1.95646	0.065421	0.32186	-4.2368	162	148	121	116
CACNA2D2	-0.325431	0.699094	-1.05722	0.303797	0.635583	-4.98827	44	53	40	36
CACNB1	-0.135296	1.50186	-0.460759	0.650253	0.861662	-5.57253	108	59	79	63
CACNB2	-0.29324	1.96407	-1.42424	0.170754	0.494845	-4.89029	104	128	93	93
CACNB3	0.158856	1.42889	0.646372	0.525846	0.793894	-5.45882	65	71	71	79
CACTIN	0.0157365	5.72204	0.241586	0.811715	0.932699	-6.94366	1394	1427	1370	1441
CACTIN-AS1	-0.48296	0.181641	-1.30406	0.207942	0.537749	-4.6798	41	31	28	22
CACUL1	0.0780117	5.20893	1.10722	0.282157	0.614902	-6.22599	913	1023	1001	1012
CACYBP	-0.00110959	8.01529	-0.0271295	0.978642	0.992889	-7.45226	6658	7261	6709	6997
CAD	0.0790152	8.32381	2.12609	0.0469608	0.274116	-5.36694	8098	8665	8973	8479
CADM4	-0.210631	2.39214	-1.18791	0.249648	0.580591	-5.28346	140	163	124	134
CAHM	0.178574	0.624928	0.529761	0.602474	0.836128	-5.31932	45	33	36	51
CALB1	0.525161	1.41017	2.01224	0.0587356	0.305462	-3.9693	58	60	72	98
CALCOCO1	-0.0768983	4.5953	-0.927576	0.365376	0.687851	-6.23826	646	688	636	610
CALCOCO2	0.0338196	5.48022	0.513237	0.61376	0.842273	-6.77628	1109	1265	1211	1182
CALHM2	0.442686	2.45607	2.3953	0.027179	0.20475	-3.52294	106	149	185	155
CALM1	-0.0261362	6.81629	-0.539001	0.596207	0.832787	-7.08698	2886	3232	2929	2989
CALM2	0.0256498	8.63192	0.67978	0.504923	0.780601	-7.29065	9870	11303	10914	10303
CALM2P2	-0.564595	0.411681	-1.68696	0.108123	0.407274	-4.29355	42	44	30	27
CALM3	0.019066	8.3632	0.526541	0.604665	0.837136	-7.35332	8368	9229	8878	8685
CALML4	0.0282795	3.70339	0.248792	0.806218	0.929674	-6.35705	325	368	335	362
CALR	-0.0224403	9.37474	-0.680912	0.504222	0.780387	-7.37375	17213	18770	17390	17511
CALU	0.0606832	7.01028	1.26728	0.220516	0.551151	-6.47133	3143	3656	3572	3407
CAMK1	-0.0980648	1.13536	-0.33959	0.737927	0.902735	-5.51634	46	79	57	55
CAMK1D	-0.0643396	2.9192	-0.441353	0.663988	0.867998	-6.02723	200	215	201	190
CAMK2D	0.0741439	4.34326	0.768717	0.451604	0.74741	-6.29474	549	515	546	555
CAMK2G	-0.0219067	5.92032	-0.36363	0.720189	0.894483	-6.95614	1628	1652	1615	1567
CAMK2N1	-0.468356	2.56656	-2.73617	0.0132009	0.13849	-2.91703	173	201	123	144
CAMKK1	-0.68327	2.473	-3.15097	0.00530791	0.0826292	-2.0986	153	230	93	145
CAMKK2	0.103391	6.09112	1.78485	0.0904191	0.375681	-5.53059	1634	1908	1892	1853
CAMKMT	-0.0517232	2.96464	-0.351923	0.728807	0.899137	-6.07783	191	237	210	196
CAMKV	0.276287	2.4819	1.42913	0.169362	0.493183	-5.0254	111	165	146	182
CAMLG	0.0106169	4.75609	0.131147	0.897051	0.966307	-6.71373	688	759	699	738
CAMSAP1	0.0483318	6.53068	0.960068	0.349198	0.672705	-6.70357	2315	2576	2545	2437
CAMSAP2	0.202278	4.05281	2.02945	0.0568001	0.300557	-4.58783	388	444	486	457
CAMSAP3	0.330548	1.86094	1.45643	0.16176	0.483502	-4.82455	98	77	118	97
CAMTA1	-0.0537864	4.2215	-0.52018	0.609006	0.839781	-6.41773	449	578	513	459
CAMTA2	0.0445852	5.83772	0.614759	0.546078	0.80648	-6.80834	1535	1494	1668	1415
CAND1	0.0588925	7.65415	1.43493	0.167723	0.490471	-6.37393	4992	5630	5576	5320
CAND2	-0.0205756	4.90784	-0.25887	0.798547	0.926821	-6.73064	820	805	786	791
CANT1	-0.0241336	6.37519	-0.455963	0.653636	0.863222	-7.03008	2120	2384	2246	2117
CANX	0.0938771	10.0146	2.812	0.0112008	0.127123	-4.20816	25050	28882	28435	28192
CAP1	-0.00623005	7.21684	-0.133717	0.895047	0.966307	-7.31103	3879	4135	3839	4027
CAPG	-0.480134	2.40397	-2.69075	0.0145579	0.146839	-2.97443	161	174	111	126
CAPN1	-0.26034	7.5682	-6.15008	6.82884e-06	0.000739915	3.45975	5474	5690	4588	4597
CAPN10	0.0947103	5.27188	1.29492	0.211014	0.540639	-6.02386	942	1069	1019	1098
CAPN10-AS1	-0.0466143	2.92772	-0.306401	0.762665	0.912508	-6.08038	219	197	203	192
CAPN15	0.0278087	7.56847	0.67142	0.510114	0.785218	-7.15103	4913	5194	5211	4944
CAPN2	-0.00623742	4.91735	-0.0803622	0.936798	0.979172	-6.76465	792	835	778	819
CAPN7	0.152601	6.38274	2.80531	0.011365	0.127732	-3.70318	1992	2268	2427	2238
CAPNS1	-0.127651	7.65877	-2.93711	0.00852078	0.108917	-3.6768	5249	6130	5143	5103
CAPRIN1	0.0761694	9.18033	2.16596	0.0433736	0.262773	-5.39407	14363	16045	16363	15219
CAPRIN2	0.0686609	3.2513	0.499368	0.623309	0.848335	-6.11156	259	241	277	239
CAPS	-0.326476	2.02189	-1.4756	0.156591	0.479103	-4.84106	96	153	99	93
CAPS2	0.440121	-0.149827	1.06153	0.301888	0.634472	-4.84511	14	29	26	29
CAPZA1	0.0484736	8.35626	1.26636	0.220839	0.551224	-6.6891	8133	9214	9102	8564
CAPZA2	0.0872474	6.56225	1.65753	0.113994	0.41583	-5.83966	2273	2666	2629	2534
CAPZB	-0.0673635	7.09913	-1.49346	0.151898	0.47235	-6.19232	3570	3980	3537	3560
CARD10	0.090316	2.74251	0.582612	0.567073	0.818036	-5.89807	164	184	185	180
CARD11	-0.265921	6.64602	-5.34952	3.7853e-05	0.0028074	1.87951	2885	3018	2428	2409
CARD14	-0.721534	0.12067	-1.80148	0.087676	0.371206	-4.13634	38	36	15	32
CARD6	0.0410479	3.92164	0.377729	0.70986	0.890551	-6.38664	390	412	383	432
CARD8	-0.0615033	4.82998	-0.738359	0.469408	0.761162	-6.46432	796	766	726	747
CARD9	0.0198157	4.84646	0.253886	0.802337	0.928585	-6.71494	735	801	801	734
CARF	-0.0759162	2.54491	-0.442476	0.663189	0.867551	-5.90473	159	162	139	162
CARHSP1	-0.167692	6.04676	-2.88622	0.00952657	0.116368	-3.4569	1752	2020	1691	1615
CARKD	-0.0213542	5.18505	-0.301325	0.766472	0.91324	-6.79109	951	1019	990	923
CARM1	0.0444606	6.80846	0.942507	0.357879	0.681712	-6.7816	2850	3085	3087	2944
CARNS1	0.531412	0.516984	1.54549	0.138882	0.451081	-4.46955	37	27	53	38
CARS	0.00178131	5.92152	0.0304323	0.976043	0.991783	-7.02482	1586	1670	1637	1575
CARS2	-0.023402	5.22492	-0.316658	0.75499	0.909125	-6.79625	1013	1013	960	1004
CASC10	0.525045	0.715008	1.64939	0.115665	0.418511	-4.37134	29	45	48	56
CASC3	-0.0229602	7.2342	-0.527741	0.603848	0.836651	-7.17884	3962	4197	4036	3877
CASC4	-0.0319719	5.74736	-0.463368	0.648416	0.861193	-6.86906	1348	1578	1513	1309
CASC5	0.172214	7.16857	3.84751	0.00110187	0.0298472	-1.59419	3424	3870	4145	3949
CASC7	0.0440475	7.18398	0.988135	0.335626	0.662138	-6.81496	3644	4061	4034	3792
CASC9	-0.126334	2.46664	-0.719295	0.480799	0.766981	-5.72399	161	149	136	143
CASD1	0.0174458	3.94546	0.16169	0.873274	0.959068	-6.45393	381	443	444	379
CASK	0.280273	1.71423	1.24448	0.228603	0.55946	-5.0332	70	90	99	92
CASKIN1	-0.042717	2.99155	-0.29874	0.768413	0.914155	-6.1042	214	219	205	209
CASKIN2	0.0740957	3.79725	0.648081	0.524764	0.793583	-6.20639	332	397	357	400
CASP10	-0.0446156	4.76769	-0.543841	0.592938	0.831165	-6.57362	750	737	720	699
CASP2	-0.0103486	6.21127	-0.167687	0.868619	0.957156	-7.08389	1955	2043	2104	1815
CASP3	-0.00423443	5.92239	-0.0666033	0.9476	0.982561	-7.02321	1496	1776	1571	1640
CASP6	-0.0348211	4.72411	-0.414863	0.682935	0.876515	-6.62434	650	792	697	687
CASP7	0.0592146	3.5814	0.47326	0.641473	0.858324	-6.2346	306	324	362	288
CASP8	0.119068	5.36348	1.67474	0.110528	0.411094	-5.52163	967	1162	1136	1138
CASP8AP2	0.0504088	5.85085	0.794503	0.436811	0.738265	-6.68288	1423	1630	1643	1473
CASP9	-0.212472	4.52344	-2.30532	0.0327147	0.225619	-4.23162	596	739	552	581
CASS4	-0.164384	4.59967	-1.73592	0.0989278	0.390003	-5.22744	697	682	564	651
CAST	-0.05275	6.00622	-0.824103	0.420207	0.727555	-6.6982	1613	1915	1772	1578
CASZ1	0.0865556	0.443481	0.253296	0.802787	0.928585	-5.36966	41	30	37	36
CAT	-0.00928884	7.23657	-0.208732	0.836901	0.944075	-7.30145	3805	4339	4002	3964
CATSPER2	-0.0462853	3.07872	-0.318445	0.753656	0.908583	-6.12739	222	239	246	196
CAV1	0.358219	0.334685	1.00319	0.328497	0.655231	-4.96606	22	39	39	36
CAV2	-0.189455	4.47371	-1.98371	0.062075	0.313175	-4.7887	568	712	531	573
CBFA2T2	0.043325	4.94612	0.564535	0.579059	0.824366	-6.61155	775	858	871	788
CBFA2T3	-0.435211	6.69275	-9.01468	2.96016e-08	1.10958e-05	9.12298	3090	3379	2385	2328
CBFB	0.0139293	7.31883	0.320658	0.752004	0.907785	-7.2862	4021	4529	4251	4250
CBL	-0.135433	6.73822	-2.73999	0.0130925	0.137978	-3.91472	2942	3073	2786	2611
CBLB	0.595456	0.85134	1.95043	0.0661836	0.324461	-3.99452	39	39	69	49
CBLL1	0.105334	5.64094	1.35774	0.190609	0.516825	-6.03592	1294	1293	1514	1238
CBR4	0.0315143	5.67157	0.485304	0.633064	0.854117	-6.83905	1347	1363	1412	1317
CBS	0.0201296	8.44202	0.556562	0.584387	0.826339	-7.34619	9009	9558	9406	9148
CBWD1	0.269883	3.72113	2.32067	0.0317022	0.221373	-3.97628	299	347	416	353
CBWD2	0.152148	5.13524	2.11176	0.0483153	0.277529	-4.74489	836	958	1001	962
CBWD3	-0.464515	2.31457	-1.69542	0.106483	0.404494	-4.61836	100	241	123	103
CBWD5	0.205246	3.46799	1.51025	0.147593	0.465612	-5.2147	305	252	325	302
CBWD6	0.376404	2.96245	2.58527	0.018239	0.165523	-3.2844	173	194	228	242
CBX1	0.0514095	6.20719	0.873994	0.393142	0.711626	-6.70591	1819	2087	1935	2053
CBX2	-0.349452	5.72784	-5.64678	1.98641e-05	0.00170058	2.7043	1535	1682	1287	1201
CBX3	-0.0164476	8.7777	-0.397081	0.695776	0.883027	-7.46508	10822	12986	11720	11410
CBX3P2	-0.144304	0.917779	-0.483871	0.634062	0.854431	-5.40811	56	50	41	54
CBX3P9	-0.62128	0.416505	-1.85893	0.0787514	0.352966	-4.08249	43	45	28	28
CBX4	-0.633597	4.96397	-7.97871	1.86837e-07	4.62722e-05	7.44805	954	1141	683	645
CBX5	-0.14798	8.14935	-3.69575	0.00155548	0.0387307	-2.08603	7537	8550	7063	7231
CBX6	-0.0258947	6.02231	-0.451078	0.657089	0.865202	-6.94527	1726	1799	1718	1693
CBX7	-0.185694	2.84211	-1.18232	0.251808	0.582555	-5.42418	178	235	178	178
CBX8	-0.254688	3.45841	-2.05241	0.0543074	0.295368	-4.3755	294	352	260	273
CBY1	0.297862	2.43465	1.70699	0.104276	0.400277	-4.63606	118	144	161	156
CC2D1A	-0.110748	5.07991	-1.41501	0.173406	0.497734	-5.82142	966	924	876	846
CC2D1B	-0.0828384	5.62664	-1.28817	0.213306	0.542798	-6.12013	1340	1393	1316	1227
CC2D2A	0.0476711	3.07893	0.337883	0.739193	0.903407	-6.12125	225	221	220	234
CCAR1	0.0724295	8.19818	1.83269	0.0827237	0.362037	-5.85515	7416	7986	8325	7643
CCAR2	-0.0225283	7.3981	-0.53937	0.595958	0.832544	-7.20335	4361	4782	4461	4406
CCBL1	-0.181016	3.4874	-1.50595	0.148685	0.467387	-5.22627	313	328	275	282
CCBL2	0.0982569	4.56796	1.12527	0.274626	0.606592	-6.0311	602	630	692	609
CCDC101	-0.0517951	4.36993	-0.567119	0.577338	0.823279	-6.43888	520	613	534	542
CCDC102A	-0.331375	2.83153	-2.10097	0.0493578	0.279862	-4.11981	223	206	161	174
CCDC104	-0.0553145	4.85165	-0.717739	0.481736	0.767538	-6.48562	754	828	746	754
CCDC106	-0.26277	4.77405	-3.32018	0.00363488	0.0655203	-2.23782	756	856	669	654
CCDC107	0.0097129	0.848354	0.0322203	0.974636	0.991089	-5.49328	39	58	47	48
CCDC109B	-0.0347271	3.96945	-0.329993	0.745051	0.904906	-6.41918	395	458	437	384
CCDC11	-0.123024	1.21983	-0.433378	0.669669	0.870199	-5.50602	73	58	71	48
CCDC112	0.238725	3.08075	1.63937	0.11775	0.422967	-4.91451	185	235	263	225
CCDC113	-0.0822703	3.20702	-0.595906	0.55834	0.813374	-6.04369	266	245	247	227
CCDC115	-0.000634762	3.7678	-0.00569332	0.995517	0.998325	-6.40976	351	381	386	336
CCDC116	-0.107106	1.02856	-0.37419	0.712447	0.890959	-5.47747	48	66	58	46
CCDC117	0.119762	5.73641	1.8383	0.0818605	0.359621	-5.35622	1275	1479	1548	1400
CCDC12	-0.0705932	5.85234	-1.13736	0.269668	0.600667	-6.35405	1470	1718	1485	1503
CCDC120	-0.0750584	3.37368	-0.562261	0.580576	0.825084	-6.11892	304	269	272	261
CCDC121	0.162129	2.18801	0.79275	0.437807	0.738631	-5.58542	102	130	150	108
CCDC124	-0.0555459	6.60676	-1.07044	0.297962	0.631052	-6.60943	2529	2815	2478	2589
CCDC125	-0.157752	4.97265	-2.06433	0.0530523	0.291409	-4.78762	854	929	830	746
CCDC126	0.061617	2.96116	0.367134	0.717616	0.893975	-6.07125	166	250	234	190
CCDC127	-0.0827109	4.82298	-1.05251	0.305897	0.637105	-6.1825	740	826	717	740
CCDC130	-0.135723	4.6278	-1.59692	0.126943	0.437954	-5.44475	684	708	606	643
CCDC132	0.126404	4.75102	1.38631	0.181864	0.507296	-5.77145	620	771	810	686
CCDC134	-0.00394821	2.35489	-0.0210619	0.983418	0.994315	-5.94009	150	126	133	136
CCDC136	-0.0572749	1.72956	-0.254889	0.801574	0.928183	-5.70888	89	92	95	77
CCDC137	0.0329719	6.57353	0.632071	0.534947	0.79948	-6.97747	2434	2628	2494	2611
CCDC138	0.154451	5.48976	2.38308	0.0278759	0.207944	-4.33032	1093	1197	1272	1239
CCDC14	0.0728207	7.00095	1.50102	0.149948	0.469442	-6.16195	3237	3479	3659	3307
CCDC142	0.252105	3.41932	1.99152	0.0611446	0.310856	-4.4671	237	291	325	294
CCDC147	-0.509762	0.387216	-1.38468	0.182353	0.507766	-4.62653	51	34	35	23
CCDC15	-0.124866	2.89127	-0.783415	0.443135	0.743148	-5.8122	189	228	215	164
CCDC150	-0.0510572	4.90725	-0.593983	0.559598	0.813692	-6.58352	850	793	757	803
CCDC154	0.0016964	1.42536	0.00661973	0.994788	0.998085	-5.64907	63	81	62	81
CCDC157	-0.234193	1.93104	-1.10208	0.284326	0.617301	-5.23891	96	127	99	87
CCDC159	-0.102881	1.80283	-0.430229	0.671917	0.870956	-5.67451	115	82	95	82
CCDC162P	0.335641	0.369825	0.985037	0.337105	0.66373	-4.98656	32	29	41	35
CCDC163P	-0.120881	2.66755	-0.715482	0.483097	0.768621	-5.78967	184	172	179	144
CCDC167	0.0331008	3.71125	0.288311	0.776261	0.917601	-6.34877	311	387	357	345
CCDC169	0.813355	0.967758	2.47391	0.0230709	0.185063	-3.22396	50	31	85	54
CCDC17	0.0555939	2.00587	0.234978	0.816764	0.934473	-5.80068	81	136	129	91
CCDC171	-0.167893	0.168483	-0.455585	0.653903	0.863222	-5.25145	37	27	28	27
CCDC173	-0.0512967	2.26945	-0.281379	0.781491	0.919998	-5.87428	125	138	126	124
CCDC174	0.00318816	4.79463	0.0393876	0.968996	0.989472	-6.7329	749	741	744	726
CCDC176	-0.605939	0.0155684	-1.59134	0.128195	0.439323	-4.36906	32	34	18	25
CCDC18	0.0273005	4.41005	0.307699	0.761692	0.912097	-6.5678	539	593	592	545
CCDC180	-0.520489	0.987466	-1.776	0.0919096	0.378135	-4.24473	57	70	37	51
CCDC183	0.00816286	1.55748	0.0335671	0.973576	0.990866	-5.68715	87	71	80	75
CCDC183-AS1	0.000933796	2.31178	0.00486608	0.996169	0.998753	-5.92649	142	125	146	117
CCDC22	-0.171098	4.33503	-1.90131	0.07269	0.339783	-4.8856	548	603	513	494
CCDC23	0.0412397	3.74729	0.375747	0.711308	0.890551	-6.33099	344	367	374	347
CCDC24	0.0637435	0.812814	0.201506	0.842465	0.946698	-5.46704	35	59	43	52
CCDC25	0.0739093	5.79851	1.18399	0.25116	0.582207	-6.28776	1452	1464	1538	1485
CCDC28A	0.16175	3.91053	1.4107	0.174654	0.49886	-5.48477	405	361	443	398
CCDC28B	-0.0202039	4.01711	-0.202411	0.841768	0.946375	-6.46947	417	459	427	424
CCDC3	-0.144295	0.669822	-0.458345	0.651955	0.862289	-5.35939	43	46	46	34
CCDC34	0.0730042	5.55836	1.01335	0.323749	0.65083	-6.41099	1143	1330	1218	1347
CCDC39	0.215359	2.26944	1.04481	0.30935	0.639441	-5.3942	114	126	169	111
CCDC40	0.0957763	1.09376	0.298731	0.76842	0.914155	-5.51719	65	47	79	42
CCDC41	0.071585	4.69389	0.826521	0.418868	0.727217	-6.35627	630	729	757	652
CCDC43	0.0698438	5.45547	1.0405	0.311297	0.641323	-6.35771	1080	1224	1176	1206
CCDC47	0.0444663	7.83095	0.915448	0.371542	0.691759	-6.99607	5458	6642	6375	5890
CCDC50	-0.0111168	5.64248	-0.172642	0.864776	0.955729	-6.93826	1247	1453	1334	1303
CCDC51	0.116132	4.32932	1.24855	0.227144	0.558163	-5.81728	472	568	559	550
CCDC53	0.0908772	2.96175	0.633645	0.533941	0.798752	-5.9393	194	211	214	211
CCDC57	-0.0986405	5.38684	-1.41426	0.173621	0.498008	-5.89874	1165	1162	1074	1066
CCDC58	0.1216	4.1575	1.04458	0.309452	0.639441	-5.98897	486	435	449	539
CCDC59	0.0348953	5.75159	0.573133	0.573342	0.82103	-6.81162	1353	1510	1459	1430
CCDC6	0.261174	6.02487	4.62212	0.000190345	0.00891858	0.383466	1530	1668	1909	1867
CCDC61	-0.0369302	3.29044	-0.287483	0.776885	0.917632	-6.20855	258	274	266	245
CCDC64	-0.60538	0.155055	-1.66317	0.112848	0.414002	-4.29986	38	35	26	21
CCDC65	-0.481244	1.74462	-1.95793	0.0652366	0.321523	-4.10461	95	118	96	58
CCDC66	0.0758036	4.58039	0.789935	0.439409	0.739793	-6.3516	564	693	715	592
CCDC69	-0.164055	5.52822	-2.55525	0.0194378	0.170299	-4.00543	1263	1363	1171	1138
CCDC7	0.349504	0.831739	1.10801	0.28182	0.614265	-4.96964	52	34	54	51
CCDC71	0.0197695	4.59962	0.23742	0.814897	0.933719	-6.64655	606	689	650	643
CCDC71L	0.0264823	4.3473	0.294014	0.771966	0.915405	-6.55222	517	567	563	525
CCDC74A	-0.0232269	2.49037	-0.125336	0.901587	0.967603	-5.97588	165	140	134	161
CCDC74B	-0.00504421	0.587068	-0.0154524	0.987834	0.99541	-5.42991	33	48	36	43
CCDC77	0.0201928	4.24563	0.215916	0.831377	0.940775	-6.54029	497	515	521	490
CCDC78	0.147312	3.87115	1.31519	0.204251	0.534078	-5.5941	381	366	389	426
CCDC8	-0.135942	5.54598	-2.09595	0.0498501	0.281388	-4.87165	1256	1377	1167	1194
CCDC80	0.371663	2.0376	1.79474	0.0887788	0.373214	-4.40984	92	101	111	137
CCDC82	-0.00144989	5.56241	-0.0206114	0.983773	0.994583	-6.93324	1142	1409	1256	1248
CCDC84	-0.285791	3.67785	-2.45716	0.0238939	0.188823	-3.70953	354	406	331	284
CCDC85B	-0.0765142	5.49755	-1.08264	0.292648	0.625683	-6.32413	1142	1357	1133	1200
CCDC85C	-0.12752	4.9263	-1.51426	0.146579	0.464133	-5.64602	799	910	721	824
CCDC86	0.08627	6.85978	1.83643	0.0821476	0.359856	-5.62264	2929	3131	3166	3173
CCDC88A	0.188302	7.11475	3.89204	0.000995768	0.0281843	-1.48391	3370	3612	4136	3711
CCDC88B	-0.702176	2.8297	-4.54587	0.000226017	0.0102439	0.719522	231	256	158	137
CCDC88C	0.186506	5.37075	2.70442	0.0141363	0.143947	-3.67063	965	1123	1167	1172
CCDC9	-0.138832	4.91435	-1.77906	0.0913927	0.377015	-5.24762	795	907	743	780
CCDC90B	0.129057	5.28025	1.70751	0.104177	0.400229	-5.45128	893	1113	1106	1049
CCDC91	0.109145	4.70736	1.27346	0.218364	0.547646	-5.90144	667	685	771	668
CCDC92	-0.365095	3.76521	-3.07208	0.00632536	0.0922464	-2.50889	426	404	345	290
CCDC93	0.221498	5.35326	2.95512	0.00819005	0.106957	-3.15023	1001	1034	1262	1081
CCDC94	-0.184937	4.85777	-2.36687	0.0288261	0.210879	-4.20755	808	853	707	733
CCDC97	0.13571	5.93213	2.31948	0.0317794	0.221593	-4.55796	1530	1601	1711	1678
CCER2	-0.0473932	0.0338016	-0.123437	0.90307	0.968203	-5.30126	22	34	23	30
CCHCR1	0.0785283	5.68106	1.18956	0.249016	0.580145	-6.25167	1249	1439	1473	1324
CCM2	-0.349776	5.31446	-4.96416	8.85464e-05	0.00518164	1.28859	1128	1289	916	952
CCNA2	0.0821882	8.25249	2.20266	0.0402943	0.251925	-5.21884	7664	8275	8548	8081
CCNB1	0.0532491	8.20236	1.42168	0.171485	0.495262	-6.46992	7457	8093	7930	7966
CCNB1IP1	-0.0110635	5.68645	-0.172079	0.865213	0.955912	-6.94954	1293	1490	1413	1307
CCNB2	0.0834035	7.07548	1.73387	0.0992986	0.390632	-5.83073	3327	3722	3590	3769
CCNC	0.0309736	7.27882	0.624962	0.539502	0.802387	-7.1297	3827	4449	4394	3936
CCND1	-0.246729	1.10912	-0.830588	0.416623	0.726536	-5.25593	76	52	47	57
CCND2	-0.439716	5.52391	-5.83895	1.31647e-05	0.0012581	3.15259	1314	1575	1135	965
CCND3	-0.50827	7.12268	-11.0724	1.11237e-09	1.1541e-06	12.3998	4193	4752	3083	3109
CCNDBP1	-0.192524	5.7201	-3.14948	0.00532555	0.0827493	-2.82264	1447	1583	1326	1286
CCNE1	-0.00562945	4.83066	-0.0717518	0.943557	0.981562	-6.74118	716	818	777	728
CCNE2	0.265205	3.42409	2.01621	0.058284	0.304919	-4.42711	240	287	345	281
CCNF	0.0338553	7.38751	0.702549	0.490939	0.773906	-7.09723	4105	4812	4708	4280
CCNG1	-0.00390373	7.2263	-0.0840369	0.933915	0.978383	-7.31855	3839	4227	4162	3769
CCNG2	-0.224213	1.85729	-1.03693	0.312914	0.642183	-5.2807	91	120	90	87
CCNH	0.095735	5.8609	1.38959	0.180881	0.506387	-6.04985	1528	1494	1525	1658
CCNI	-0.0201943	7.83712	-0.428162	0.673395	0.872018	-7.33156	5818	6578	6430	5627
CCNJ	0.144516	5.17902	2.05858	0.0536546	0.292829	-4.84903	893	959	1023	994
CCNK	-0.00194043	6.09158	-0.0340119	0.973226	0.990866	-7.0681	1773	1895	1779	1831
CCNL1	0.041498	6.63212	0.820373	0.422276	0.728589	-6.85137	2458	2805	2743	2591
CCNL2	-0.149849	8.06657	-3.36226	0.00330671	0.0622399	-2.81695	7517	7662	7104	6394
CCNO	-0.0855172	1.57825	-0.364367	0.719647	0.894176	-5.63175	74	91	81	72
CCNT1	0.153913	6.9917	3.34587	0.00343096	0.0633607	-2.67698	3050	3443	3622	3492
CCNT2	0.0479696	6.12473	0.85022	0.405893	0.71922	-6.70621	1721	1973	1911	1849
CCNY	0.0598394	6.45128	1.14637	0.266014	0.59621	-6.49149	2157	2456	2424	2311
CCNYL1	-0.081186	3.46817	-0.653255	0.521496	0.791576	-6.09527	275	338	280	290
CCP110	0.105817	5.52841	1.55511	0.136581	0.449383	-5.73881	1138	1255	1346	1194
CCPG1	-0.0440023	3.87433	-0.3802	0.708056	0.889253	-6.37038	412	389	418	348
CCR10	-0.822988	1.63847	-3.33123	0.00354571	0.0642816	-1.7286	106	116	77	49
CCRL2	-0.0220931	1.41776	-0.0893713	0.929731	0.977146	-5.64318	67	77	76	64
CCRN4L	0.0829519	3.9564	0.809702	0.428234	0.731156	-6.13958	378	433	430	416
CCS	0.0428203	4.20496	0.417538	0.681012	0.87602	-6.46173	492	484	466	526
[truncated: 13,230 more rows]

## Sheet: 6h_down
Supplemental Table 6: RNA transcriptome analysis of AID-KMT2D K562 cells with 5-Ph-IAA treatment for 6 hours, 12 hours and 24 hours vs. without 5-Ph-IAA treatment grown in the expansion culture.
gene_name	logFC	AveExpr	t	P.Value	adj.P.Val	B	C13_D6_1	C13_D6_2	C13_I6_1	C13_I6_2
AC004987.9	-1.10907	0.792567	-3.33864	0.00348713	0.0637293	-1.83867	72	64	23	41
AC005618.6	-1.35413	-0.247557	-3.42662	0.0028604	0.0567538	-1.93877	40	32	15	12
AC006126.4	-1.23849	1.68139	-5.00527	8.08165e-05	0.00487323	1.32515	122	142	45	67
AC011290.5	-0.847994	0.395948	-2.50714	0.0215157	0.1783	-3.1912	44	50	25	26
AC062029.1	-0.670916	0.892614	-2.30438	0.0327779	0.225831	-3.48419	60	65	40	37
ADAM8	-0.774382	1.38722	-3.09333	0.00603405	0.089313	-2.17344	87	96	52	53
AKR7A2P1	-1.51179	-0.419371	-3.80227	0.0012212	0.0323222	-1.42299	31	36	14	9
AL592188.7	-1.23244	1.90365	-2.73623	0.0131993	0.13849	-2.81651	267	90	42	96
AMHR2	-0.799218	3.44556	-6.37055	4.32124e-06	0.000520005	4.40092	377	395	231	206
ANGPTL4	-0.763693	0.830008	-2.51836	0.0210132	0.176199	-3.15524	56	68	41	31
ANKRD19P	-0.926625	0.0613287	-2.29707	0.0332716	0.22819	-3.50639	49	30	21	18
ANO9	-0.870863	-0.00597778	-2.10711	0.0487619	0.278533	-3.7569	28	45	14	26
AP3B2	-0.800862	1.11301	-2.75734	0.0126108	0.134979	-2.76327	82	71	36	51
APOBEC3F	-0.847167	1.42553	-3.36156	0.00331192	0.0622399	-1.6916	100	93	51	54
AQP7	-0.84112	0.44103	-2.40613	0.0265755	0.201959	-3.33575	38	61	28	25
ARHGAP23	-0.995297	0.863225	-3.27287	0.00404201	0.0699858	-1.93066	68	69	29	39
ARHGEF40	-0.823707	2.83917	-5.36844	3.63203e-05	0.00274847	2.37289	250	261	147	137
ASIC4	-0.7869	5.18352	-10.1645	4.46548e-09	3.34403e-06	11.0955	1298	1268	721	743
AXL	-0.742193	3.64643	-6.36741	4.34931e-06	0.000520005	4.41447	429	441	266	246
B3GNT4	-0.716112	0.489287	-2.11453	0.0480505	0.276932	-3.74756	43	53	24	34
BAIAP2-AS1	-0.7084	3.97077	-6.88328	1.52842e-06	0.00023041	5.42146	516	561	332	317
BATF2	-0.6258	1.63095	-2.51449	0.0211854	0.176787	-3.18879	117	91	61	70
BCL3	-0.999284	0.984654	-3.41884	0.00291108	0.0575125	-1.6622	80	70	37	36
BCL9L	-0.669104	3.6081	-5.57203	2.33388e-05	0.00193824	2.82909	417	409	251	260
BOLA2B	-1.18985	0.104366	-2.86624	0.00995195	0.118883	-2.70919	35	53	28	12
BZRAP1-AS1	-0.80808	0.431489	-2.34475	0.0301716	0.215363	-3.42437	44	51	22	32
C20orf112	-1.04508	3.91481	-9.6507	1.02017e-08	6.15164e-06	10.054	576	588	281	274
CAMKK1	-0.68327	2.473	-3.15097	0.00530791	0.0826292	-2.0986	153	230	93	145
CBX4	-0.633597	4.96397	-7.97871	1.86837e-07	4.62722e-05	7.44805	954	1141	683	645
CCDC88B	-0.702176	2.8297	-4.54587	0.000226017	0.0102439	0.719522	231	256	158	137
CCR10	-0.822988	1.63847	-3.33123	0.00354571	0.0642816	-1.7286	106	116	77	49
CDK3	-0.794569	0.229259	-2.17432	0.0426538	0.260143	-3.66496	42	40	19	28
CLIP2	-1.00942	0.0525746	-2.64968	0.0158983	0.153905	-3.02261	33	46	21	17
CNN1	-0.738328	4.52332	-8.40761	8.56971e-08	2.70121e-05	8.20598	752	845	461	482
CPAMD8	-1.01926	1.39019	-3.78099	0.00128171	0.0333742	-0.945247	101	99	61	38
CRB2	-0.878021	2.47273	-4.79259	0.000129835	0.00671898	1.18319	198	206	125	93
CRIP2	-1.40612	0.581965	-4.19938	0.000495176	0.0179311	-0.544836	56	75	22	26
CRYGS	-0.59906	1.20952	-2.10628	0.0488424	0.278752	-3.80398	59	97	51	48
CSRNP1	-0.902345	4.03952	-8.26918	1.0992e-07	3.11119e-05	7.91184	547	664	303	335
CTD-2358C21.4	-0.696809	0.746474	-2.15323	0.0444905	0.265362	-3.70158	46	70	41	29
CTD-3064M3.7	-1.32133	0.67999	-3.56694	0.00208307	0.0468234	-1.50321	81	57	38	18
CXorf65	-0.968216	0.145745	-2.62626	0.0167142	0.157908	-3.0434	35	48	21	20
CYP2D7P	-0.907568	-0.0945425	-2.19625	0.0408169	0.253876	-3.64586	40	29	14	22
DAB2IP	-1.20894	3.81127	-10.2267	4.04856e-09	3.30291e-06	10.8096	556	590	225	265
DACT3	-1.27259	1.64281	-5.28982	4.31374e-05	0.00305241	1.79359	117	144	58	48
DDX11-AS1	-0.917996	-0.0497832	-2.17641	0.0424754	0.259741	-3.66974	39	32	27	12
DHH	-1.09078	0.380221	-2.79721	0.0115667	0.128644	-2.76521	68	38	24	22
DNAJB2	-0.703938	3.63316	-5.52849	2.5644e-05	0.002117	2.73944	382	471	236	281
DNAJC22	-1.26088	-0.108146	-3.16957	0.0050924	0.0806925	-2.29671	30	48	14	17
DYRK1B	-0.836585	3.48329	-6.54065	3.04915e-06	0.000395221	4.72832	375	428	206	238
EHD2	-0.75047	5.30616	-10.5314	2.51997e-09	2.31009e-06	11.6574	1337	1422	853	764
EIF5AP2	-1.52911	-0.411766	-3.8132	0.00119123	0.0315893	-1.40492	30	38	9	14
ENTPD3	-0.843613	0.799827	-2.77571	0.012119	0.132034	-2.75038	55	70	33	35
EPOR	-0.845485	4.95605	-11.1154	1.04374e-09	1.1541e-06	12.4658	1068	1169	620	606
ERBB3	-0.72288	1.80065	-3.23751	0.00437521	0.073812	-1.89625	105	136	70	73
ERF	-0.602143	5.62377	-9.21511	2.105e-08	8.84673e-06	9.56997	1585	1680	1034	1086
EXOC3L2	-1.06613	3.12602	-6.94332	1.35641e-06	0.000209023	5.37401	339	340	186	136
EXOC3L4	-0.712751	2.54776	-3.62775	0.00181492	0.0431013	-1.15234	226	179	107	135
FAM131A	-0.586354	2.21187	-2.90924	0.00905833	0.11318	-2.53634	127	181	104	96
FAM212A	-0.767041	1.07017	-2.62204	0.0168656	0.158906	-2.98675	64	83	35	51
FAM214B	-1.41678	3.03567	-8.06593	1.59143e-07	4.08731e-05	7.15992	386	337	157	111
FAM46B	-0.886772	0.0396849	-2.10393	0.0490695	0.27937	-3.76021	46	30	14	27
FAXDC2	-0.736469	3.7445	-6.25052	5.53938e-06	0.000629719	4.19098	465	464	258	292
FGFR3	-0.782416	4.30101	-8.34721	9.55003e-08	2.80318e-05	8.08393	684	705	401	394
FMNL1	-0.629815	1.63472	-2.37025	0.0286254	0.210383	-3.43167	88	121	88	49
FOS	-0.683334	1.75454	-3.05593	0.00655593	0.0933513	-2.2329	116	113	68	72
FOSB	-0.79235	0.440866	-2.35072	0.0298026	0.214139	-3.41551	46	49	24	30
GAL3ST4	-1.20097	0.889676	-3.99798	0.000782582	0.0244451	-0.723251	75	75	29	35
GDF2	-0.860335	1.70753	-3.52468	0.00229211	0.0498265	-1.36451	99	139	56	73
GLI1	-1.27542	0.180725	-3.27564	0.00401696	0.0698135	-2.09492	45	49	27	13
GPR153	-0.818122	1.65243	-3.26698	0.00409571	0.0703883	-1.84612	89	139	65	60
GPRC5C	-1.31143	1.05635	-4.34098	0.000359154	0.0141912	-0.0940405	88	87	27	44
GRK5	-1.11743	-0.205929	-2.7789	0.0120354	0.131512	-2.86407	30	38	12	19
HDAC7	-0.68801	5.96505	-11.1023	1.06414e-09	1.1541e-06	12.5135	2078	2185	1383	1227
HFE2	-1.13549	1.07424	-3.90239	0.000972609	0.0277213	-0.818561	87	80	32	43
HIST2H4A	-1.15745	0.442188	-2.5558	0.0194151	0.170207	-3.11927	85	35	32	17
HOXC13-AS	-0.756024	0.967813	-2.53742	0.0201849	0.17334	-3.12358	55	83	40	39
HRC	-0.677424	3.11963	-4.9016	0.000101778	0.00562365	1.4543	289	301	182	181
ICAM5	-0.76565	5.70674	-10.4951	2.66504e-09	2.31009e-06	11.6106	1832	1830	1155	972
ID1	-0.5904	4.50371	-6.63855	2.49907e-06	0.000336501	4.93501	748	748	500	478
IFITM2	-0.714889	1.14144	-2.57279	0.0187286	0.167471	-3.06707	66	86	51	40
IQSEC2	-0.712411	2.57384	-4.04889	0.000697047	0.0226402	-0.298345	176	236	124	122
ITGA2B	-0.699515	1.06029	-2.46932	0.0232937	0.185901	-3.23251	61	82	41	45
KAZALD1	-0.865983	2.17644	-3.99385	0.000789974	0.0245305	-0.424847	187	144	93	83
KCNE3	-1.02255	-0.0984422	-2.62039	0.0169249	0.15914	-3.07952	31	40	19	15
KCNN4	-0.731431	1.39317	-2.93107	0.00863469	0.109565	-2.45884	88	93	55	52
KIAA1522	-0.75388	5.7264	-11.0413	1.165e-09	1.1541e-06	12.424	1792	1905	1169	996
KIF25-AS1	-1.52439	-0.273139	-3.4696	0.00259597	0.0538169	-1.869	45	31	8	19
KIFC3	-0.598173	5.27764	-8.59198	6.17482e-08	2.08875e-05	8.52298	1254	1311	842	827
KLHDC8A	-0.929124	-0.0057672	-2.39341	0.0272861	0.205112	-3.3814	37	36	23	15
KLHDC8B	-0.866086	3.84909	-7.87591	2.26023e-07	5.40469e-05	7.20463	482	565	286	279
KLHL30	-1.35021	-0.123332	-3.43938	0.00277928	0.0557827	-1.9045	41	37	12	18
KREMEN2	-0.677576	2.6849	-4.098	0.000623413	0.0206845	-0.199195	226	211	137	131
KRT19	-0.813982	6.41175	-15.5103	3.58773e-12	2.48791e-08	18.0985	2927	3142	1698	1703
LA16c-380H5.5	-0.644227	0.95012	-2.24579	0.0369323	0.241839	-3.57487	60	69	39	42
LINC00482	-0.87778	0.844626	-2.88418	0.00956921	0.116622	-2.57179	60	70	30	40
LINC00694	-0.926184	1.15001	-3.06265	0.00645897	0.0927973	-2.24567	76	88	59	30
LINC00852	-0.820172	0.236006	-2.10476	0.0489889	0.279255	-3.75759	30	57	28	19
LINC01155	-0.863436	0.0654819	-2.26324	0.0356464	0.23734	-3.55101	38	37	25	16
LMTK3	-0.64779	2.11483	-3.05784	0.00652814	0.0930512	-2.24518	153	138	79	105
LPAR5	-0.788799	2.44144	-4.468	0.000269445	0.0114936	0.538737	189	194	114	104
LRRC16A	-0.703854	0.896509	-2.26504	0.0355161	0.2367	-3.54343	60	67	50	29
MAP1A	-1.06037	6.67558	-20.1983	3.26981e-14	4.5349e-10	22.6007	3774	4165	1822	1930
MAP3K14-AS1	-0.812707	0.366714	-2.36055	0.0292047	0.211509	-3.40399	43	48	29	22
MAPK8IP1	-0.805752	3.00712	-5.459	2.9817e-05	0.00234962	2.57364	261	311	171	151
MATN1-AS1	-0.835392	0.110722	-2.1693	0.0430845	0.2617	-3.67379	29	50	21	21
MEG8	-0.828133	1.54876	-3.23332	0.00441635	0.0742429	-1.9133	119	92	60	55
MIDN	-0.711025	6.14933	-12.4323	1.61549e-10	3.20074e-07	14.3716	2389	2493	1522	1417
MIR22HG	-0.866197	2.90718	-5.12352	6.21982e-05	0.00404989	1.89427	282	263	174	123
MMP15	-0.668092	4.32195	-6.99442	1.22583e-06	0.000193052	5.63657	620	738	439	402
MRC2	-0.596661	4.98387	-7.28451	6.9464e-07	0.000128453	6.1531	941	1158	673	691
MT-TS1	-0.730939	1.12027	-2.25558	0.0362056	0.239448	-3.56925	51	108	45	44
MTX1P1	-1.09521	3.04182	-2.1236	0.0471937	0.274795	-4.10929	719	150	156	137
MUC1	-0.693799	3.79539	-6.03499	8.69309e-06	0.000880032	3.76392	470	479	315	264
MYEOV	-1.37396	1.48001	-4.94177	9.30679e-05	0.00533372	1.11081	96	149	40	52
MYRF	-0.614429	5.00906	-8.11488	1.45501e-07	3.85421e-05	7.6915	1033	1109	722	657
NAB2	-0.697707	5.29585	-9.38516	1.58229e-08	7.16626e-06	9.86305	1318	1370	779	856
NARF-IT1	-1.36373	0.677414	-3.75821	0.00134979	0.0344755	-1.19853	75	63	39	17
NDUFA6-AS1	-0.842421	0.937248	-2.80627	0.0113412	0.127568	-2.6911	56	83	38	37
NEURL1	-1.21409	-0.473222	-2.91415	0.0089612	0.112372	-2.69445	29	29	9	16
NFATC4	-0.803641	2.06323	-3.8674	0.00105314	0.0288655	-0.680012	128	170	82	85
NHLRC4	-0.745257	0.85185	-2.3383	0.0305744	0.217121	-3.43173	58	67	49	27
NOTCH3	-0.630859	3.16	-4.43892	0.000287747	0.0120204	0.489693	310	288	188	191
NOXA1	-0.632907	1.33479	-2.45548	0.0239783	0.189167	-3.26568	82	86	60	47
NPM1P50	-0.769174	0.594176	-2.36083	0.0291878	0.211509	-3.39753	49	56	26	35
NR2F1	-0.668232	0.73481	-2.16465	0.0434875	0.263145	-3.68477	58	54	37	32
NT5DC4	-0.746596	0.414038	-2.14985	0.0447917	0.266274	-3.6978	38	55	24	30
NYNRIN	-0.823739	2.75213	-5.00617	8.06555e-05	0.00487323	1.6447	251	231	139	128
OBSCN	-0.622169	5.2776	-8.49371	7.34956e-08	2.42693e-05	8.35115	1290	1297	866	790
OCLM	-0.787329	0.485734	-2.36245	0.0290904	0.211334	-3.39739	47	51	32	24
OSBP2	-0.586579	5.90272	-8.74672	4.70556e-08	1.67337e-05	8.74709	1834	2114	1399	1195
OSGEPL1-AS1	-0.712018	0.401937	-2.10271	0.0491881	0.279815	-3.76192	43	47	30	24
OSGIN1	-1.50213	0.833906	-4.18622	0.000510193	0.0183312	-0.457726	88	73	18	42
P2RX6	-0.842948	2.65419	-4.89983	0.000102182	0.00562365	1.42141	218	234	110	140
PEAR1	-2.09761	1.32041	-7.61876	3.66161e-07	7.46806e-05	4.6438	130	147	31	32
PFKFB4	-1.02118	3.92801	-9.60777	1.09458e-08	6.23981e-06	9.99776	564	601	284	281
PLEKHA4	-0.703536	4.82398	-8.60908	5.9913e-08	2.07733e-05	8.56235	892	1055	602	574
PLEKHA6	-0.723932	1.71331	-3.05447	0.00657717	0.0934618	-2.23512	115	111	80	56
PMEL	-1.15274	-0.247223	-2.94205	0.00842893	0.108546	-2.63808	29	38	15	14
PPFIBP2	-1.4559	-0.0355575	-3.78928	0.0012578	0.0329762	-1.38084	40	46	19	12
PRSS8	-0.926973	-0.281558	-2.31895	0.0318142	0.221724	-3.49258	29	31	18	13
PTGDR2	-1.57489	2.16624	-7.69593	3.16513e-07	6.75342e-05	5.87516	193	223	66	71
PTP4A3	-0.877779	6.0068	-13.3145	5.04221e-11	1.16551e-07	15.5005	2252	2433	1180	1338
PTPRH	-0.689306	2.58367	-4.02042	0.00074366	0.0236014	-0.356319	211	198	131	118
RAB11FIP4	-0.726058	1.48151	-2.89682	0.00930824	0.115096	-2.51791	96	96	50	65
RAB26	-0.836932	0.975821	-2.73225	0.0133133	0.139142	-2.80992	75	66	49	30
RAB3D	-0.717526	1.71178	-3.06672	0.00640097	0.0926446	-2.21268	122	104	67	67
RAD9B	-0.654878	1.03679	-2.3126	0.0322308	0.223581	-3.47722	61	77	40	46
RASGRP2	-0.615727	2.56102	-3.66174	0.00168027	0.0407782	-1.08503	188	204	134	118
RCAN3	-0.795748	2.71943	-4.84327	0.000115927	0.00615366	1.31612	212	255	144	121
REC8	-0.731375	1.54298	-3.06977	0.00635785	0.0925257	-2.20895	96	105	63	56
RN7SK	-1.20361	-0.090242	-2.53058	0.0204786	0.174208	-3.19766	41	35	8	31
RN7SL417P	-1.14031	-0.148878	-2.79452	0.0116345	0.129294	-2.83724	35	36	22	11
RNA18S5	-0.702823	3.97039	-4.45391	0.000278165	0.0117261	0.424933	439	654	403	263
RP1-200K18.1	-0.855433	0.630314	-2.7066	0.0140699	0.143799	-2.87303	53	58	31	29
RP1-40E16.9	-0.638664	1.04927	-2.29467	0.0334352	0.228655	-3.50546	64	74	42	45
RP11-1055B8.4	-0.809309	1.60287	-3.34132	0.00346617	0.0637293	-1.71217	92	125	58	63
RP11-111F16.2	-1.22962	0.452375	-3.15093	0.00530843	0.0826292	-2.21455	46	67	15	36
RP11-122K13.12	-0.603807	1.47113	-2.37128	0.0285649	0.210168	-3.41362	101	83	56	62
RP11-138I1.3	-0.610675	1.20955	-2.28281	0.0342539	0.232066	-3.53375	80	73	50	48
RP11-173M1.8	-0.903921	0.617163	-2.74354	0.0129925	0.137447	-2.81719	47	66	26	33
RP11-269F19.2	-1.37574	-0.468046	-3.44948	0.00271663	0.0552793	-1.93706	27	35	13	10
RP11-269G24.4	-0.848832	0.513249	-2.25212	0.036461	0.240227	-3.55534	57	46	42	18
RP11-305E6.4	-0.73838	0.563511	-2.24103	0.0372903	0.243036	-3.57128	54	48	34	26
RP11-320M2.1	-0.605821	1.32275	-2.14145	0.0455484	0.269272	-3.76248	86	79	41	69
RP11-353N14.2	-1.2936	0.0455898	-3.4492	0.00271833	0.0552793	-1.87287	40	46	18	16
RP11-465L10.10	-0.999787	0.295958	-2.62298	0.0168315	0.158744	-3.03166	37	57	17	30
RP11-486A14.1	-0.650547	1.42427	-2.61295	0.0171956	0.160213	-3.00788	85	95	62	51
RP11-497H17.1	-0.794517	0.74704	-2.55732	0.0193528	0.169876	-3.09716	60	58	38	29
RP11-529E10.6	-0.798326	0.36917	-2.21566	0.0392523	0.249377	-3.60715	41	50	34	19
RP11-655M14.12	-1.31716	-0.0334555	-3.45534	0.00268096	0.0548796	-1.87213	42	40	18	14
RP11-69L16.5	-0.67198	2.38428	-2.96786	0.00796363	0.105188	-2.4438	194	161	83	143
RP4-584D14.5	-1.09854	-0.0469043	-2.79078	0.0117293	0.129828	-2.83662	43	33	18	16
RP5-977B1.7	-1.29632	-0.230224	-3.20071	0.00475037	0.0776985	-2.26354	27	46	13	15
RPL5P34	-0.856732	1.07301	-2.39355	0.027278	0.205112	-3.35211	70	81	24	70
RPL9P8	-0.840484	0.112285	-2.1338	0.0462467	0.271466	-3.72036	45	33	27	16
RYR1	-0.632723	3.46713	-5.1621	5.71224e-05	0.00377253	1.98773	350	390	245	225
SARNP	-0.757859	1.344	-2.80378	0.0114028	0.127853	-2.6804	75	103	44	60
SEMA7A	-0.621257	2.94039	-4.08558	0.000641263	0.0211251	-0.236036	229	284	175	153
SERPINE3	-0.661889	0.850539	-2.24523	0.036974	0.241883	-3.57142	58	63	39	36
SERTAD3	-0.660909	4.33615	-7.14555	9.10549e-07	0.000152149	5.92373	642	724	444	407
SH3TC1	-0.726042	1.09599	-2.61604	0.0170827	0.159881	-2.99634	76	71	42	45
SLC16A3	-0.9066	0.318729	-2.52662	0.0206501	0.174952	-3.16885	38	54	28	20
SLC25A21-AS1	-1.14334	0.0567236	-2.8663	0.00995072	0.118883	-2.71685	41	41	13	25
SLC6A19	-0.636343	6.61945	-11.8293	3.72077e-10	6.45041e-07	13.537	3276	3314	2169	2009
SNAI1	-0.666359	2.05387	-3.10831	0.00583657	0.0874448	-2.14532	153	129	96	78
SNAI3	-0.832677	0.614172	-2.56876	0.0188892	0.167954	-3.08589	57	52	27	33
SOCS3	-0.994867	2.57321	-5.52052	2.60905e-05	0.00212852	2.60528	236	216	123	100
SPACA6P	-0.745108	1.58808	-3.03405	0.00688129	0.0965957	-2.27252	95	114	73	51
SPCS2P4	-0.721771	2.25382	-2.53545	0.0202689	0.173468	-3.22883	234	117	107	88
SPDYE1	-0.714155	0.52515	-2.10282	0.0491774	0.279815	-3.76458	55	44	34	25
SPEG	-0.647684	3.653	-5.48834	2.79763e-05	0.00225583	2.65609	421	425	283	249
SPSB1	-1.19944	0.238618	-3.06714	0.00639506	0.0926446	-2.38752	35	64	24	17
SSPO	-0.913512	0.723185	-2.91966	0.00885366	0.111463	-2.52811	62	59	35	28
TBC1D10C	-0.641716	0.883633	-2.15291	0.0445195	0.265362	-3.70903	57	66	34	44
TBXA2R	-1.06072	2.97121	-6.4239	3.87199e-06	0.000475227	4.39477	267	345	166	124
TLE6	-0.990267	0.743543	-3.18085	0.00496577	0.0792523	-2.1039	65	61	29	33
TMC4	-0.835205	0.112594	-2.26789	0.0353113	0.235902	-3.54254	34	43	20	22
TNFRSF12A	-0.790663	3.07863	-5.02539	7.72878e-05	0.00472205	1.70713	269	330	200	144
TNXB	-0.920334	1.53939	-3.83624	0.00113046	0.0303843	-0.812066	103	111	54	57
TRERF1	-0.913788	0.115911	-2.38633	0.0276892	0.206908	-3.38182	41	38	16	26
TRNP1	-0.735615	0.848403	-2.34951	0.0298769	0.21431	-3.41471	57	67	29	46
TRPM4	-0.647337	3.5356	-5.24177	4.7935e-05	0.00330752	2.15062	379	400	230	261
TXK	-0.75821	0.945579	-2.54398	0.019907	0.172177	-3.11335	71	63	34	44
UBXN10	-0.666603	3.44403	-5.04937	7.32861e-05	0.00455787	1.75421	353	384	259	201
UNC5B	-0.980959	0.49267	-2.8079	0.0113011	0.127568	-2.73254	62	45	28	24
VAV1	-0.775472	0.731635	-2.11983	0.047548	0.275496	-3.74819	79	43	40	27
VWA1	-0.766781	2.29453	-3.73926	0.00140916	0.0357239	-0.921811	139	210	102	97
ZFPM1	-0.723185	4.96677	-9.2839	1.87465e-08	8.12486e-06	9.69427	1071	1088	640	648
ZFYVE28	-0.596805	1.01085	-2.10066	0.0493875	0.279917	-3.79431	58	75	42	44
ZNF385A	-0.66824	5.46	-10.1483	4.5812e-09	3.34403e-06	11.0785	1434	1549	930	919
ZNF467	-2.73441	0.0660605	-7.15188	8.99339e-07	0.000152109	2.98594	83	63	8	13

## Sheet: 6h_up
Supplemental Table 6: RNA transcriptome analysis of AID-KMT2D K562 cells with 5-Ph-IAA treatment for 6 hours, 12 hours and 24 hours vs. without 5-Ph-IAA treatment grown in the expansion culture.
gene_name	logFC	AveExpr	t	P.Value	adj.P.Val	B	C13_D6_1	C13_D6_2	C13_I6_1	C13_I6_2
AC073415.2	1.12786	-0.184929	2.89667	0.00931128	0.115096	-2.69913	16	15	36	32
ADAMTS5	0.959823	0.628836	2.73944	0.0131082	0.138039	-2.82261	32	27	74	43
AIG1	1.06825	0.167463	2.72525	0.0135158	0.140203	-2.89922	26	16	36	50
AL021068.1	0.803851	1.07575	2.84329	0.0104632	0.121581	-2.62133	35	51	76	71
AL590431.1	0.626032	1.12315	2.25272	0.0364167	0.240163	-3.57456	52	42	72	70
AL807752.1	0.985049	-0.290329	2.39343	0.0272851	0.205112	-3.3955	19	12	29	31
BMS1P20	0.768264	0.387514	2.14279	0.045427	0.269128	-3.70725	25	28	57	35
BRINP3	0.627767	2.1638	2.78678	0.0118314	0.130437	-2.76005	113	83	174	123
BVES	0.759369	1.89019	3.53948	0.00221663	0.0487976	-1.32279	67	86	126	129
CCDC169	0.813355	0.967758	2.47391	0.0230709	0.185063	-3.22396	50	31	85	54
CKMT1B	0.618336	1.96922	2.97298	0.00787434	0.104407	-2.39547	86	83	123	133
CRYM-AS1	0.975053	-0.151984	2.46843	0.0233372	0.186121	-3.29053	14	20	31	35
CTD-2031P19.4	0.906844	1.78519	3.67545	0.00162883	0.039912	-1.07398	72	63	151	102
CTD-2044J15.2	0.681143	1.38019	2.70329	0.0141705	0.144084	-2.85288	49	61	91	83
DHFRP1	0.657331	4.62246	2.45403	0.0240508	0.189523	-3.96904	866	326	663	993
DNAH5	0.647202	0.701842	2.09967	0.049485	0.280125	-3.77605	32	37	56	51
DYNC2H1	0.839709	0.122577	2.13499	0.046138	0.271139	-3.71857	27	17	32	45
FAM155B	0.741703	1.28979	2.74859	0.0128515	0.136475	-2.7749	42	60	94	74
FAM201B	0.742882	0.29247	2.14182	0.0455149	0.269272	-3.70819	23	27	42	41
FAM3C2	0.841772	1.14203	3.06788	0.00638452	0.0926223	-2.23622	39	49	74	82
FAM86EP	0.657406	1.78646	2.79761	0.0115567	0.128636	-2.70475	86	63	121	107
FAT4	0.639397	1.91091	2.93427	0.0085742	0.109197	-2.46342	70	92	115	134
GAGE12I	2.04656	-0.0909627	2.99168	0.00755636	0.101648	-2.52054	4	34	103	24
GFI1	0.852617	0.321297	2.4703	0.0232458	0.185734	-3.24931	24	25	46	42
GOLGA6L9	0.729952	1.73288	2.41219	0.0262427	0.200639	-3.37182	40	116	116	112
LRRC23	1.08756	0.610862	3.27429	0.00402912	0.0698498	-1.98066	32	24	54	63
LRRC3DN	0.857653	0.0152315	2.20357	0.0402208	0.251691	-3.63171	16	24	31	41
LURAP1L	0.844825	0.45352	2.40949	0.0263903	0.201545	-3.33031	20	36	53	44
MACROD2	1.20218	-0.194384	3.02262	0.0070573	0.0979756	-2.5191	16	14	30	40
MIR4292	0.596159	2.17271	2.75823	0.0125865	0.134979	-2.81409	75	127	160	135
MTFP1	0.594052	1.00629	2.11033	0.0484521	0.277698	-3.78002	41	46	69	61
NBPF14	0.676752	3.83005	6.26175	5.41181e-06	0.000620301	4.2149	291	313	492	460
PHKA1P1	1.02513	0.64228	2.68734	0.0146651	0.147245	-2.9028	47	18	57	59
PRICKLE1	0.824038	2.10183	4.14816	0.000556261	0.0192389	-0.129618	78	95	154	148
RGPD2	0.878575	1.56171	3.11323	0.00577307	0.0870624	-2.1303	64	53	138	80
RGPD6	1.69401	0.460608	4.00486	0.000770446	0.0242919	-0.916042	37	11	68	61
RP11-162D16.2	0.658654	1.26218	2.47484	0.0230258	0.185022	-3.23042	54	48	87	72
RP11-274M17.1	0.605641	1.25246	2.3209	0.031687	0.221373	-3.47726	48	55	82	73
RP11-329A14.1	0.901925	0.987028	3.1355	0.00549395	0.0843805	-2.13896	38	39	78	65
RP11-353N4.6	1.09952	0.469585	3.08533	0.00614214	0.0906227	-2.30852	26	24	67	42
RP11-50B3.4	0.721074	0.73878	2.22338	0.0386454	0.247725	-3.5999	35	34	70	45
RP11-73K9.2	0.79869	0.644138	2.51228	0.0212839	0.177076	-3.16994	34	29	55	53
RP5-902P8.10	0.98184	-0.0911968	2.54045	0.0200559	0.172765	-3.18861	16	19	33	36
SERF1B	1.41985	2.20091	3.62048	0.0018451	0.04368	-1.15874	127	45	132	294
SOX21	0.612022	3.07921	3.82446	0.00116114	0.0310695	-0.796034	161	208	320	239
SPRY3	0.790087	0.386563	2.20565	0.0400521	0.251441	-3.62085	33	21	49	41
ST3GAL6	0.822284	0.615616	2.53038	0.0204869	0.174208	-3.14382	30	31	62	46
SUGT1P	0.601942	1.48942	2.12245	0.0473021	0.274835	-3.81201	49	75	119	70
TOB2P1	0.618171	2.20323	3.1451	0.0053778	0.0832861	-2.08541	97	102	169	134
TSTD3	0.645663	1.33742	2.44633	0.0244411	0.191944	-3.28092	48	60	74	94
UBE2SP1	0.898854	0.722593	2.87247	0.00981749	0.117886	-2.60297	30	34	54	65
WNT5B	0.761171	3.17609	4.88814	0.000104878	0.00574924	1.42641	205	170	346	278
ZNF280C	0.605004	1.55337	2.2287	0.0382326	0.246785	-3.65334	83	49	90	100

## Sheet: K562_limmavoom_IAA12hVSDMSO
Supplemental Table 6: RNA transcriptome analysis of AID-KMT2D K562 cells with 5-Ph-IAA treatment for 6 hours, 12 hours and 24 hours vs. without 5-Ph-IAA treatment grown in the expansion culture.
gene_name	logFC	AveExpr	t	P.Value	adj.P.Val	B	C13_D6_1	C13_D6_2	C13_I12_1	C13_I12_2
A1BG-AS1	0.29704	1.12842	1.10907	0.277172	0.480907	-4.99701	50	55	63	62
AAAS	-0.0928181	6.6425	-1.80338	0.0824893	0.217127	-5.54747	2753	2794	2371	2658
AACS	0.178872	5.27295	2.57583	0.0157868	0.0677831	-3.75702	943	1010	1033	1104
AACSP1	-0.101504	3.01634	-0.679655	0.502504	0.691334	-5.85224	200	251	208	198
AADAT	-0.238543	1.38099	-0.876302	0.388588	0.590902	-5.24802	96	60	59	64
AAED1	0.234657	4.16371	2.35472	0.0260539	0.0970091	-3.90037	414	474	497	513
AAGAB	-0.125409	6.26081	-2.25707	0.0322935	0.113337	-4.64299	2006	2304	1873	1943
AAK1	-0.32337	2.26895	-1.73903	0.0934111	0.235368	-4.48501	142	147	105	118
AAMDC	-0.00884364	1.18025	-0.0322631	0.974499	0.988051	-5.53445	71	52	57	59
AAMP	0.177155	7.70636	3.88978	0.000591229	0.00579413	-1.13038	5058	5511	5241	6340
AAR2	-0.0391453	5.92217	-0.667363	0.510199	0.69796	-6.73548	1582	1724	1463	1648
AARS	0.00343221	7.77566	0.0826946	0.934704	0.969381	-7.33456	5578	6201	5318	6102
AARS2	0.188688	6.20699	3.33621	0.00248021	0.0171887	-2.24192	1829	1892	1903	2200
AARSD1	0.0579629	2.67225	0.357518	0.723481	0.853035	-5.9081	165	170	160	177
AASDH	-0.0952974	4.28926	-0.897122	0.377576	0.580495	-6.08401	578	510	501	480
AASDHPPT	0.258858	6.89709	4.61013	8.66617e-05	0.00135907	0.886267	2591	3299	3309	3472
AASS	0.166301	3.61483	1.3904	0.175753	0.360143	-5.33535	312	309	324	349
AATF	0.00152516	6.9511	0.0330157	0.973905	0.987937	-7.19275	3197	3453	3080	3355
AATK	0.195276	0.63748	0.568394	0.57446	0.749479	-5.27138	42	36	28	64
ABAT	-1.20884	4.36059	-12.1153	1.96652e-12	8.97765e-10	17.9179	817	859	362	340
ABC7-42389800N19.1	-0.157832	4.11177	-1.54342	0.134358	0.300092	-5.27517	493	488	412	437
ABC7-43041300I9.1	-0.910362	1.68595	-3.97123	0.000476901	0.00495991	-0.16256	114	122	61	60
ABCA11P	-0.393158	0.296762	-1.13096	0.268007	0.469946	-4.83315	30	46	29	26
ABCA17P	0.398496	0.894446	1.38652	0.17692	0.361471	-4.67456	41	45	56	54
ABCA2	-0.0709623	5.32114	-1.0079	0.322441	0.5266	-6.29368	1097	1106	951	1076
ABCA3	0.326052	7.04108	7.12773	1.14707e-07	6.57373e-06	7.47193	3070	3254	3650	4015
ABCA5	0.67875	0.141435	1.84576	0.0759094	0.205305	-4.06044	20	26	43	30
ABCA7	-0.64781	5.0837	-8.69151	2.60688e-09	3.02529e-07	11.4217	1099	1182	686	721
ABCA8	0.51594	0.259089	1.36644	0.183063	0.369255	-4.60986	39	18	38	35
ABCB10	0.315766	6.52852	5.78199	3.75182e-06	0.000112361	4.06466	2018	2445	2557	2801
ABCB10P1	-0.412471	0.454452	-1.18329	0.246999	0.446947	-4.81004	32	55	23	40
ABCB10P3	0.305041	0.590369	0.964298	0.343446	0.548616	-5.01691	35	37	36	51
ABCB10P4	-0.349151	1.66826	-1.45146	0.158162	0.336783	-4.74024	85	107	86	62
ABCB6	-0.271643	2.01719	-1.3045	0.203065	0.394075	-4.99562	123	116	81	111
ABCB7	0.0800246	4.98963	1.06095	0.298102	0.50095	-6.14642	790	871	823	874
ABCB8	-0.275347	6.58876	-5.44933	9.10204e-06	0.000232578	3.17345	2677	3021	2191	2357
ABCB9	-0.674691	2.76672	-3.98355	0.000461624	0.00484444	-0.0132461	248	216	122	158
ABCC1	0.206382	6.80328	4.31025	0.000193598	0.00252203	0.112069	2643	2951	2984	3253
ABCC10	-0.145381	5.58969	-2.05633	0.049525	0.152958	-4.86244	1390	1336	1084	1299
ABCC4	0.178919	6.92972	3.8054	0.000738011	0.00685169	-1.21817	2920	3243	3284	3457
ABCC5	-0.0141022	6.86902	-0.280812	0.780994	0.887486	-7.13622	3155	3158	2949	3092
ABCD1	-0.277576	5.51731	-4.26753	0.000216998	0.00274969	0.260594	1285	1427	1037	1125
ABCD3	0.174338	4.98326	2.27011	0.0313882	0.111027	-4.30057	738	865	838	909
ABCD4	-0.0845618	4.8146	-1.01192	0.32055	0.525141	-6.14311	773	786	641	782
ABCE1	0.105541	8.3262	2.51111	0.0183175	0.0753366	-4.4916	7834	8812	8708	8593
ABCF1	0.0908645	8.54034	2.52127	0.0178967	0.0741312	-4.49975	9290	10111	9686	10281
ABCF2	0.209416	7.5364	4.79193	5.31615e-05	0.000909493	1.26511	4311	4989	4891	5496
ABCF3	0.0142231	5.85278	0.234272	0.816539	0.908092	-6.91718	1490	1600	1495	1522
ABCG2	-0.506874	3.28899	-3.76566	0.000818966	0.00741252	-0.565993	310	315	213	212
ABHD10	0.0243327	4.24017	0.243309	0.809603	0.904495	-6.44031	459	549	501	490
ABHD11	0.219147	3.59441	1.82962	0.0783597	0.209611	-4.68686	298	303	325	351
ABHD12	-0.306252	5.10834	-4.12547	0.00031684	0.00364353	-0.0168116	963	1100	793	819
ABHD13	0.189857	4.04215	1.74523	0.0923074	0.23362	-4.95105	406	421	478	437
ABHD14A	0.027099	2.11975	0.131518	0.89634	0.949523	-5.79279	98	134	125	104
ABHD14B	0.131695	5.49757	2.01101	0.0543965	0.162699	-4.92167	1097	1225	1162	1297
ABHD15	0.225975	3.63897	1.87816	0.0711885	0.196234	-4.61969	278	343	326	375
ABHD16A	-0.372931	1.80571	-1.70434	0.0997909	0.245977	-4.43567	98	115	82	77
ABHD16B	-0.146599	3.89871	-1.35731	0.185911	0.372572	-5.46252	399	444	359	377
ABHD17A	-0.0612181	6.91764	-1.20605	0.238249	0.436675	-6.45609	3257	3385	2809	3357
ABHD17B	0.107929	4.38526	1.17621	0.249767	0.449329	-5.8333	510	572	545	582
ABHD2	-0.00752571	7.89229	-0.182179	0.856802	0.929756	-7.33861	6337	6468	5845	6474
ABHD3	-0.0245421	4.29557	-0.251485	0.803342	0.900476	-6.45612	504	562	454	561
ABHD4	-0.0601041	3.67013	-0.516573	0.609656	0.774544	-6.15298	341	357	308	339
ABHD5	0.0865924	5.216	1.21812	0.233707	0.431391	-6.03608	917	1022	975	1015
ABHD6	0.0851824	3.293	0.643112	0.525571	0.710855	-5.96252	238	273	259	265
ABHD8	-0.012429	3.639	-0.100123	0.920986	0.962362	-6.27126	307	365	340	306
ABI1	0.0640154	5.43279	0.957485	0.34681	0.552026	-6.37346	1073	1200	1079	1218
ABI2	0.0352212	6.21816	0.641977	0.526296	0.711636	-6.8233	1857	2101	1862	2057
ABL1	0.171537	8.41774	4.64285	7.93673e-05	0.00126897	0.748	8182	9160	8960	9915
ABL2	0.0880372	6.39014	1.68482	0.10354	0.251991	-5.6842	2081	2295	2137	2359
ABLIM1	-0.139824	4.68551	-1.64241	0.112092	0.266653	-5.30574	684	767	641	633
ABO	0.337456	4.39808	3.60105	0.00125724	0.0103262	-1.17014	502	505	612	618
ABR	0.165974	2.31907	0.869237	0.392372	0.594708	-5.50626	140	114	137	136
ABRACL	0.0677548	4.28985	0.711089	0.483122	0.675035	-6.23259	477	551	493	548
ABT1	0.105653	6.54109	2.07272	0.0478602	0.149406	-5.05469	2296	2534	2360	2665
ABTB1	-0.363612	0.726242	-1.17884	0.248736	0.44819	-4.85724	43	58	31	45
ABTB2	0.293259	3.43507	2.28286	0.030526	0.108834	-3.84536	248	276	318	304
AC000068.5	0.0609579	2.18148	0.318908	0.752248	0.869361	-5.77167	118	120	111	129
AC000078.5	-0.775285	1.5695	-3.27478	0.00289747	0.0194552	-1.63272	96	112	58	59
AC000089.3	-0.454553	0.817965	-1.50051	0.145076	0.316765	-4.53437	46	65	43	35
AC000120.7	-0.0575697	0.200006	-0.1567	0.876646	0.940135	-5.3016	22	43	31	27
AC000123.4	-0.0104498	1.0964	-0.0376393	0.970252	0.986501	-5.51315	48	68	47	64
AC002056.3	-0.239539	0.272198	-0.677555	0.503813	0.692265	-5.14431	32	38	21	38
AC002310.12	-0.110337	0.988611	-0.338352	0.737713	0.861139	-5.43768	54	55	74	33
AC002467.7	-0.23753	1.48853	-0.964688	0.343255	0.548436	-5.20322	68	97	61	73
AC002472.1	-0.0863481	0.282098	-0.248072	0.805954	0.902608	-5.30345	37	30	25	36
AC002480.2	-0.33811	3.05594	-2.28931	0.0300978	0.107721	-3.73973	263	240	181	202
AC002539.1	-0.264238	1.05219	-0.9268	0.362234	0.566666	-5.13543	71	52	47	50
AC003104.1	0.415281	2.94339	2.66213	0.0129154	0.0586626	-2.98631	152	209	210	253
AC003665.1	-0.865118	0.191992	-2.45237	0.0209337	0.0829603	-3.22564	42	40	20	23
AC004057.1	0.417098	5.04848	4.66518	7.47449e-05	0.00121317	1.39588	685	858	1057	938
AC004074.3	-0.0708321	2.40387	-0.39338	0.697125	0.8354	-5.81341	132	159	138	130
AC004158.2	-0.0731867	0.790897	-0.23552	0.81558	0.907757	-5.4165	46	48	54	35
AC004166.6	0.41211	0.432874	1.26358	0.217174	0.41187	-4.73285	29	33	38	42
AC004257.3	0.0017964	1.06132	0.00630245	0.995018	0.997932	-5.50506	43	71	55	53
AC004381.6	-0.0110539	5.64878	-0.167008	0.868607	0.935589	-6.87868	1227	1489	1238	1362
AC004447.2	0.364376	3.98907	3.42128	0.00199697	0.014629	-1.51141	371	380	466	469
AC004453.8	-0.526373	0.685606	-1.70424	0.0998094	0.245977	-4.27244	46	57	37	32
AC004463.6	0.334177	4.04398	3.19522	0.00353919	0.0228074	-2.05504	377	413	439	525
AC004471.9	0.56393	1.54869	2.15193	0.0404967	0.132915	-3.71314	76	55	71	117
AC004540.5	-0.340258	1.23863	-1.25327	0.220842	0.415938	-4.87666	63	80	42	69
AC004797.1	0.228745	3.81036	1.97606	0.0584377	0.171124	-4.50198	321	375	408	382
AC004840.9	-0.0943484	2.30259	-0.508415	0.615288	0.778459	-5.73365	139	134	125	122
AC004893.11	-0.186485	2.09469	-0.874237	0.389692	0.591999	-5.43689	132	114	82	129
AC004951.6	-0.2718	0.156664	-0.766049	0.450287	0.646498	-5.07444	29	36	28	24
AC004967.7	-0.105579	2.65253	-0.619382	0.540852	0.722692	-5.77879	165	184	172	144
AC004980.7	0.0869091	3.21462	0.634017	0.5314	0.715446	-5.94364	241	242	249	247
AC004987.9	-0.98709	0.854571	-3.27727	0.00287927	0.0193704	-1.74189	72	64	36	30
AC005003.1	0.190152	0.761096	0.628389	0.535024	0.718421	-5.26794	47	38	43	50
AC005076.5	-0.910341	0.782164	-2.81455	0.0090014	0.0449296	-2.58271	77	52	26	39
AC005083.1	-0.212542	1.94026	-0.992816	0.329606	0.533607	-5.29388	120	102	94	90
AC005104.3	0.159975	0.707145	0.50223	0.619573	0.781396	-5.31553	46	37	34	57
AC005154.6	0.00262427	4.89187	0.0318433	0.974831	0.988099	-6.67955	800	796	698	849
AC005224.2	0.182666	0.15552	0.50289	0.619115	0.781126	-5.20349	27	28	37	25
AC005229.1	0.12014	0.265898	0.343725	0.733713	0.85899	-5.27792	36	26	30	34
AC005253.2	0.157505	1.27328	0.610651	0.546532	0.727004	-5.39482	57	65	69	63
AC005306.3	0.156171	0.173099	0.443799	0.660721	0.811403	-5.22866	24	33	29	32
AC005307.3	-0.215446	1.45376	-0.882645	0.385212	0.587922	-5.26086	82	76	62	69
AC005329.7	0.897255	0.611953	2.75576	0.0103563	0.049835	-2.7007	29	30	63	46
AC005330.2	-0.565405	-0.0425196	-1.42497	0.165612	0.346346	-4.52044	29	34	13	31
AC005546.2	-1.21968	-0.306976	-2.5996	0.0149416	0.0652483	-3.08089	33	33	6	28
AC005618.6	-0.196071	0.331016	-0.575636	0.569624	0.745351	-5.20577	40	32	28	32
AC005682.5	-0.0512299	1.85663	-0.23832	0.813431	0.906662	-5.69465	99	98	95	89
AC005785.2	-0.424511	0.441296	-1.29702	0.205589	0.397533	-4.701	37	47	29	31
AC005943.4	-0.152421	0.303077	-0.450732	0.655778	0.807531	-5.25125	34	35	27	33
AC005943.5	0.646147	2.12631	2.93881	0.00666817	0.0362943	-2.30933	87	99	171	118
AC006014.1	0.658845	0.330224	1.90855	0.0669938	0.187869	-3.9866	23	30	46	36
AC006116.20	-0.262187	-0.00962912	-0.668818	0.509285	0.697228	-5.09894	23	36	16	33
AC006126.4	-0.995731	1.80373	-4.43696	0.000137917	0.00193417	0.873772	122	142	68	60
AC006262.5	-0.606334	1.05691	-2.13703	0.0417987	0.136225	-3.69401	56	83	45	42
AC006486.1	-0.248878	1.26274	-0.951179	0.349943	0.555047	-5.16212	62	78	61	53
AC006538.1	0.799889	2.46379	4.45751	0.000130527	0.0018553	1.08096	100	125	171	208
AC006547.13	0.389333	3.49161	2.94871	0.00650929	0.0356349	-2.48903	245	282	358	313
AC006547.14	0.374513	0.21623	1.07579	0.291534	0.494687	-4.86789	28	26	30	38
AC006946.16	0.585198	1.65704	2.50103	0.0187438	0.0765249	-3.12253	72	66	86	115
AC006978.6	-0.0437475	2.80244	-0.280641	0.781123	0.887486	-5.97188	190	190	169	187
AC007000.12	-0.0622621	-0.0606895	-0.163306	0.871492	0.937174	-5.24977	20	33	25	23
AC007038.7	0.0192276	0.930602	0.0666683	0.947337	0.976362	-5.47125	42	60	50	49
AC007128.1	-0.271184	2.18677	-1.39965	0.172993	0.356376	-4.92562	123	145	112	103
AC007131.1	-0.293771	0.884272	-0.996722	0.327741	0.531639	-5.0456	58	51	47	39
AC007246.3	0.208541	2.15797	1.06538	0.296131	0.498803	-5.287	118	105	117	131
AC007308.6	-0.460076	0.685084	-1.49063	0.147639	0.320532	-4.52816	45	56	30	41
AC007318.5	-0.0615735	5.6796	-0.96366	0.343761	0.548866	-6.43225	1338	1476	1300	1307
AC007383.3	-0.227527	2.50993	-1.23319	0.228125	0.424768	-5.20686	139	196	116	160
AC007405.4	-0.311738	0.627553	-0.957246	0.346929	0.552152	-5.02846	39	53	44	29
AC007405.6	-0.0463602	2.4019	-0.253924	0.801476	0.899121	-5.85601	126	164	120	151
AC007551.3	-0.0681216	0.936192	-0.22974	0.820024	0.90986	-5.45172	53	51	58	40
AC007620.3	-0.0465228	2.41966	-0.251823	0.803083	0.900317	-5.86184	156	137	118	156
AC007969.5	-0.0308344	4.13417	-0.235244	0.815793	0.907914	-6.40754	485	473	347	579
AC008132.12	-0.53888	0.915427	-1.86271	0.0734067	0.200404	-4.0847	54	68	35	46
AC008746.5	0.0245756	0.068178	0.0664115	0.947539	0.976427	-5.28327	33	23	24	30
AC008982.2	-0.182818	1.36415	-0.711305	0.48299	0.675023	-5.35839	70	77	50	77
AC009005.2	-0.5932	1.31481	-2.18206	0.037973	0.127394	-3.64102	97	69	54	50
AC009120.6	0.0804927	1.45005	0.331347	0.742938	0.864276	-5.55656	72	70	68	77
AC009133.12	0.534504	1.65007	2.30112	0.0293277	0.105778	-3.4743	66	73	104	92
AC009133.14	-0.0992512	1.24531	-0.38406	0.703939	0.840382	-5.48635	66	65	56	62
AC009245.3	-0.246724	2.6782	-1.47997	0.150445	0.324762	-4.95015	176	199	131	176
AC009299.3	-0.135573	1.99288	-0.643424	0.525372	0.710853	-5.56903	111	113	81	118
AC009299.5	-0.109058	0.98415	-0.381951	0.705484	0.840909	-5.42303	58	52	41	58
AC009403.2	0.0611613	3.18899	0.448397	0.657441	0.809006	-6.03394	234	245	234	249
AC009404.2	0.255195	2.95706	1.69486	0.101596	0.248782	-4.72229	197	185	203	237
AC009501.4	-0.201721	-0.253952	-0.464217	0.64621	0.801262	-5.1439	31	18	28	14
AC009506.1	-0.0863278	1.99288	-0.416564	0.680287	0.823888	-5.6807	97	124	89	112
AC009948.5	-0.354668	3.99777	-3.18252	0.00365348	0.0233494	-2.07221	432	544	330	407
AC009961.3	-0.28232	0.0147197	-0.769776	0.448109	0.644466	-5.04838	29	30	20	27
AC010524.2	0.33329	-0.0587451	0.825362	0.416392	0.616881	-5.00395	28	18	36	21
AC010525.6	-0.987893	0.534341	-3.02875	0.00535072	0.0310789	-2.25066	56	53	22	31
AC010525.7	0.262766	0.0995964	0.661643	0.513802	0.700667	-5.12189	30	22	43	21
AC010536.1	0.0364858	2.83752	0.230435	0.819489	0.90957	-5.99554	164	217	186	190
AC010642.1	0.0272649	1.67626	0.119883	0.905463	0.954468	-5.66212	81	88	87	80
AC010761.13	-0.380788	0.720335	-1.22225	0.232167	0.42934	-4.81505	57	44	39	35
AC010761.8	-0.216765	3.61109	-1.68306	0.103882	0.252403	-4.92073	310	403	257	336
AC010976.2	-0.320873	0.8293	-1.0371	0.308878	0.512625	-5.00159	46	60	51	33
AC011043.1	0.22459	6.12062	3.78753	0.000773387	0.00711023	-1.10286	1597	1868	1948	1962
AC011242.6	-0.14713	1.62431	-0.629821	0.534101	0.717458	-5.47383	90	84	66	86
AC011290.5	0.0254663	0.837142	0.0848757	0.932986	0.968742	-5.44785	44	50	54	40
AC011330.5	-0.200587	0.480108	-0.558225	0.581286	0.753443	-5.24306	31	51	22	50
AC012146.7	-0.343046	3.34042	-2.5012	0.0187366	0.0765249	-3.39554	295	319	198	273
AC012314.8	-0.278559	0.305917	-0.809797	0.42513	0.624322	-5.07373	35	37	33	25
AC012358.4	-0.142107	1.75717	-0.609779	0.547102	0.727275	-5.52133	79	114	69	100
AC012512.1	-0.301168	0.465622	-0.874435	0.389586	0.591999	-5.05944	34	48	41	25
AC012531.25	-0.577535	0.187639	-1.63841	0.112928	0.267951	-4.31041	35	39	20	28
AC013394.2	-0.0525474	5.13242	-0.709179	0.484287	0.676097	-6.49626	881	1043	857	934
AC013474.4	0.386989	0.202357	1.09623	0.282652	0.485532	-4.84911	25	28	38	30
AC015815.6	0.14147	0.125243	0.391897	0.698208	0.836184	-5.23639	22	34	26	33
AC015849.16	-0.305572	0.740922	-0.985871	0.332941	0.537632	-5.02691	57	43	40	37
AC015849.19	-0.0708133	1.91194	-0.331677	0.742691	0.864198	-5.6862	106	101	82	109
AC016629.3	-0.511697	2.59604	-3.03549	0.00526273	0.0307175	-2.14924	193	194	130	132
AC016629.8	-0.0268848	1.89938	-0.125494	0.901061	0.951886	-5.72643	97	105	81	112
AC016710.1	0.109785	1.36857	0.420371	0.677538	0.822472	-5.50524	55	79	78	62
AC016722.4	0.381377	0.466124	1.17358	0.250802	0.450376	-4.82136	32	32	42	39
AC016723.4	-0.138311	1.72142	-0.605306	0.550025	0.728866	-5.51388	99	87	71	92
AC016734.2	0.0888063	3.75043	0.775505	0.444775	0.64146	-6.01355	321	381	352	369
AC016739.2	-0.419771	3.3862	-2.64613	0.0134081	0.060216	-3.10985	344	310	177	306
AC016757.3	0.204996	2.96215	1.36728	0.182802	0.368782	-5.1746	200	190	200	234
AC016773.1	-0.178412	2.3261	-0.889038	0.381828	0.584451	-5.49103	165	124	130	114
AC017074.2	0.62012	0.278596	1.79034	0.0846095	0.221019	-4.13502	29	23	39	38
AC018470.4	-1.10759	-0.241776	-2.77672	0.00985273	0.0479752	-2.81105	35	31	13	16
AC018638.1	-0.51696	1.57313	-2.06144	0.0490008	0.151607	-3.86091	78	116	52	79
AC018720.10	-0.175875	0.400082	-0.523694	0.60476	0.7706	-5.2421	41	34	27	37
AC018755.1	-0.0166339	0.322376	-0.0476545	0.962342	0.983415	-5.3356	40	28	27	37
AC018755.16	0.311347	0.453734	0.903949	0.37401	0.577506	-5.03717	37	29	29	52
AC018766.4	-0.326017	0.767382	-1.02403	0.314898	0.518109	-5.00074	63	41	42	36
AC018766.5	-0.265981	2.15676	-1.33597	0.192702	0.381568	-4.99454	122	141	88	125
AC018804.7	-0.237117	2.78817	-1.50823	0.143099	0.313875	-4.94189	184	219	161	169
AC018890.6	0.15693	3.09856	1.09828	0.28177	0.484735	-5.52254	207	229	210	261
AC022007.5	-0.132234	2.52851	-0.741033	0.465064	0.659923	-5.66294	178	148	133	152
AC022400.1	0.216416	0.399424	0.655387	0.517759	0.704201	-5.18042	29	36	37	36
AC022431.1	0.400723	2.60903	2.40834	0.0231159	0.0887055	-3.42276	133	152	169	195
AC023490.1	-0.148432	0.304424	-0.439963	0.663462	0.812753	-5.25536	32	37	29	31
AC024162.2	0.113146	0.339731	0.315201	0.75503	0.871203	-5.30037	26	40	24	47
AC024560.3	0.156496	4.29993	1.56777	0.128571	0.29237	-5.29846	476	525	563	519
AC024937.6	0.245739	1.26378	0.917131	0.367186	0.571333	-5.19015	58	60	53	85
AC025171.1	-0.356195	2.27149	-1.81314	0.0809318	0.213972	-4.37378	151	143	90	134
AC025335.1	-0.0160719	2.00148	-0.0779959	0.938406	0.971544	-5.76172	109	107	90	117
AC026271.5	0.308117	2.86365	2.00083	0.0555478	0.164903	-4.21005	159	193	195	226
AC026740.1	-0.0822668	0.912315	-0.273509	0.786541	0.890156	-5.43654	62	43	50	44
AC027307.3	0.442723	0.001047	1.18237	0.247356	0.447289	-4.75011	18	28	32	28
AC027601.1	-0.0833838	1.05904	-0.294542	0.770595	0.881778	-5.46666	48	68	43	63
AC027612.1	-0.130589	1.41709	-0.51722	0.60921	0.774146	-5.47705	79	71	55	78
AC027612.6	0.241784	3.43814	1.86093	0.0736663	0.200916	-4.59251	257	279	269	346
AC027763.2	-0.199958	1.6544	-0.863433	0.395498	0.597688	-5.32589	77	105	74	78
AC034220.3	0.0130676	1.16483	0.0494572	0.960919	0.982363	-5.52996	59	60	56	60
AC062029.1	-0.793862	0.834983	-2.65499	0.0131332	0.0593808	-2.85076	60	65	39	31
AC068831.6	-0.230532	0.14789	-0.607799	0.548395	0.727815	-5.15659	22	45	30	23
AC069277.2	-0.103317	3.30077	-0.697589	0.491393	0.681961	-5.92869	230	326	211	288
AC069282.6	0.0634267	1.66791	0.279221	0.782201	0.888348	-5.6307	79	87	86	82
AC069547.1	0.557662	1.46951	2.13557	0.0419289	0.136458	-3.73099	76	49	89	84
AC073046.25	0.0408579	1.3118	0.151605	0.880624	0.941493	-5.55876	77	56	54	77
AC074117.10	0.250277	5.71208	4.01347	0.000426488	0.00454739	-0.43886	1242	1341	1460	1510
AC074212.3	-0.524918	2.86577	-3.41061	0.00205216	0.0149469	-1.34935	222	247	158	157
AC074286.1	0.269269	1.14249	1.00666	0.323026	0.527308	-5.09049	53	54	64	61
AC074389.9	0.0366458	1.89007	0.170558	0.865842	0.933889	-5.71758	103	93	100	94
AC079135.1	0.264404	0.180323	0.752002	0.458549	0.653676	-5.08714	24	31	28	36
AC079250.1	0.288633	0.908319	1.00405	0.324262	0.528876	-5.04491	39	52	52	55
AC079466.1	0.00836643	9.59276	0.247362	0.806498	0.902836	-7.55763	20534	20851	19285	20963
AC079807.2	-0.284943	1.47921	-1.16542	0.254034	0.453956	-5.01665	88	77	64	66
AC079922.3	-0.597635	-0.0204592	-1.5603	0.130325	0.294915	-4.38268	30	34	26	16
AC083799.1	-0.244147	2.12377	-1.23641	0.226944	0.423591	-5.09982	130	124	105	102
AC083843.1	0.216636	2.67992	1.29896	0.204931	0.396701	-5.17862	140	180	184	175
AC083899.3	0.0407529	2.24482	0.214781	0.83155	0.915718	-5.81736	126	124	129	120
AC084018.1	-0.11242	4.38079	-1.18656	0.245727	0.445281	-5.81941	587	578	481	560
AC084125.4	-0.0923632	1.87659	-0.435982	0.666313	0.814991	-5.63876	94	109	92	92
AC090587.2	0.19325	1.16179	0.643807	0.525127	0.710682	-5.34973	37	83	54	71
AC090616.2	-0.0841721	0.424118	-0.231218	0.818887	0.909323	-5.33631	33	40	49	23
AC090945.1	0.399238	1.22143	1.49514	0.146463	0.318695	-4.60285	48	61	58	82
AC091729.9	0.0201296	3.47287	0.15598	0.877208	0.940421	-6.21131	265	330	261	322
AC092171.4	0.0317889	4.44557	0.349455	0.729456	0.856355	-6.47546	538	622	535	611
AC092295.7	0.561611	1.66485	2.34788	0.0264522	0.0980333	-3.39473	54	89	97	103
AC092301.3	-0.951659	0.205673	-2.65636	0.013091	0.0592428	-2.91426	48	38	20	22
AC092811.1	-0.212636	0.565714	-0.661466	0.513914	0.70075	-5.20939	40	45	28	44
AC093110.3	-0.536149	0.205165	-1.39909	0.173158	0.356663	-4.57036	45	30	33	18
AC093323.3	0.118091	6.02055	2.0623	0.048913	0.151437	-4.95712	1631	1719	1670	1845
AC093375.1	-0.423676	0.904915	-1.462	0.155274	0.33226	-4.59095	54	62	35	49
AC093391.2	-0.511586	-0.00811722	-1.23196	0.228574	0.42521	-4.7051	23	43	13	34
AC093616.4	0.232714	3.30565	1.74518	0.0923165	0.23362	-4.74043	242	247	281	275
AC093627.9	-0.346512	2.29057	-1.80064	0.0829306	0.217867	-4.39734	161	136	112	112
AC093642.3	0.119777	1.33375	0.466984	0.644255	0.800232	-5.478	57	73	58	79
AC093642.5	-0.450113	1.38971	-1.78983	0.0846935	0.221118	-4.24321	71	94	53	63
AC093673.5	0.146206	2.08332	0.734674	0.468866	0.663155	-5.53805	110	106	105	126
AC093724.2	-0.171745	1.3582	-0.679191	0.502793	0.69148	-5.37662	71	74	67	58
AC093838.4	-0.016122	5.67521	-0.256654	0.79939	0.898258	-6.86609	1317	1445	1297	1343
AC096559.1	0.238411	1.26918	0.907834	0.37199	0.575849	-5.19857	58	60	75	61
AC096582.7	-0.131663	1.74945	-0.571812	0.572175	0.747267	-5.5397	86	102	95	73
AC096772.6	0.538688	0.0453301	1.46184	0.155317	0.332301	-4.49155	18	28	29	35
AC097662.2	0.618174	0.381067	1.83403	0.0776833	0.208443	-4.08526	31	25	37	46
AC104131.1	0.0247996	2.0764	0.125143	0.901336	0.951992	-5.78021	113	111	104	116
AC104135.3	-0.292119	2.58979	-1.73816	0.0935654	0.23554	-4.56244	169	188	143	139
AC104389.28	-0.119727	1.14813	-0.441742	0.662191	0.811963	-5.44134	53	71	58	52
AC104534.2	-0.559452	0.256602	-1.5465	0.133615	0.299007	-4.41921	48	31	26	24
AC105760.2	0.049092	0.25247	0.143459	0.886992	0.944822	-5.31392	31	31	29	33
AC108463.1	0.883456	0.206115	2.47996	0.0196645	0.0792612	-3.18239	19	26	44	37
AC108463.2	0.274578	1.46622	1.13633	0.265794	0.467708	-5.04315	64	70	79	78
AC108488.4	-0.458815	1.75914	-2.03113	0.0521845	0.1585	-3.93547	102	111	62	89
AC110781.3	0.422387	0.40652	1.27076	0.214643	0.408574	-4.72227	26	35	41	38
AC113189.5	-0.259523	2.88099	-1.69962	0.100686	0.247468	-4.69395	207	226	158	192
AC116366.5	-0.488357	1.55546	-2.06661	0.0484743	0.150547	-3.85073	91	95	65	63
AC116407.2	-0.0254605	1.115	-0.0913887	0.927858	0.96582	-5.51478	46	73	56	55
AC118138.2	0.053849	0.340033	0.147365	0.883938	0.943375	-5.33156	28	38	46	24
AC118278.1	0.601925	0.895979	2.03542	0.051723	0.157579	-3.83745	32	50	53	66
AC125232.1	-0.00493077	2.72714	-0.0309757	0.975517	0.988388	-5.98646	169	187	160	183
AC127496.1	0.505902	1.80809	2.19232	0.0371463	0.125272	-3.67857	94	66	104	111
AC131097.3	0.615081	0.309282	1.75561	0.0904849	0.230659	-4.17957	32	22	34	45
AC131971.1	0.364753	0.174923	1.00943	0.321719	0.526305	-4.91363	20	34	35	31
AC132192.1	0.167266	0.215553	0.465449	0.645339	0.800832	-5.22914	35	24	34	29
AC132872.1	-0.625735	0.30767	-1.83893	0.0769386	0.207123	-4.07516	37	45	23	28
AC133528.2	-0.037756	3.06892	-0.255479	0.800287	0.898502	-6.06235	210	248	186	247
AC137932.1	0.270054	2.03414	1.3047	0.202996	0.393997	-5.00086	84	118	106	128
AC137932.5	0.330806	1.58403	1.41223	0.169294	0.351007	-4.77067	73	70	79	95
AC137934.1	-0.606498	3.5225	-4.60798	8.71632e-05	0.00136462	1.4827	396	368	212	273
AC138035.2	-0.118183	3.72781	-1.00807	0.322362	0.526532	-5.80405	346	395	339	322
AC138123.2	-0.236238	0.888338	-0.785947	0.438735	0.635448	-5.20177	57	50	52	37
AC139099.3	-0.118485	0.679937	-0.38181	0.705588	0.840909	-5.35349	48	41	42	37
AC139100.2	0.204115	-0.58699	0.409879	0.685125	0.826529	-5.10663	26	10	27	12
AC141586.5	0.164596	3.03868	1.08014	0.289626	0.493194	-5.5232	229	190	217	233
AC144530.1	-0.0797403	1.29953	-0.300311	0.766238	0.879295	-5.52551	79	58	61	62
AC144652.1	0.237313	1.58256	1.00407	0.324252	0.528876	-5.19281	79	69	77	91
AC145212.1	0.0808537	2.8518	0.523533	0.60487	0.7706	-5.89265	184	192	196	189
AC156455.1	-0.088548	2.69646	-0.548793	0.587653	0.757823	-5.83157	165	194	158	168
ACAA1	-0.0596873	5.5783	-0.901723	0.37517	0.578127	-6.46326	1210	1418	1135	1301
ACAA2	-0.13706	5.03771	-1.65993	0.108489	0.260744	-5.38274	908	940	855	775
ACACA	0.0986373	8.19254	2.62088	0.0142211	0.0628709	-4.23914	7323	7879	7574	8160
ACACB	-0.772079	2.06348	-3.76289	0.000824938	0.0074598	-0.550877	152	141	82	83
ACAD10	-0.0794195	4.3631	-0.854691	0.400236	0.602169	-6.1444	533	604	509	531
ACAD8	-0.136312	5.55155	-2.01599	0.0538417	0.161734	-4.92586	1295	1350	1057	1273
ACAD9	-0.19244	4.92364	-2.48695	0.0193546	0.0783876	-3.84886	825	919	720	755
ACADM	-0.0552711	6.20829	-0.939029	0.356033	0.560683	-6.58479	1834	2232	1793	1981
ACADS	-0.0193245	3.95887	-0.176714	0.861051	0.932044	-6.36303	412	430	357	448
ACADSB	-0.112659	4.74155	-1.25601	0.219863	0.414768	-5.85158	651	854	639	700
ACADVL	-0.0795328	7.10338	-1.73196	0.0946815	0.237199	-5.75565	3555	4055	3308	3649
ACAP2	0.110261	5.54622	1.69973	0.100665	0.24746	-5.45868	1137	1282	1227	1296
ACAP3	-0.298553	6.17411	-5.31493	1.30431e-05	0.000303753	2.89136	2014	2295	1652	1732
ACAT1	-0.0661012	6.52227	-1.27649	0.212642	0.4064	-6.28816	2471	2586	2189	2483
ACAT2	-0.123196	7.20971	-2.66867	0.0127191	0.0580171	-3.98313	3906	4405	3646	3725
ACBD3	0.136211	6.16919	2.47256	0.0199977	0.0803346	-4.18913	1749	1943	1892	2029
ACBD4	-0.0350125	2.69728	-0.200774	0.842379	0.921739	-5.95794	201	155	158	173
ACBD5	0.0157657	4.73937	0.190281	0.850511	0.925836	-6.61418	708	719	682	712
ACBD6	0.0303173	6.23911	0.544444	0.5906	0.760068	-6.88688	1915	2107	1835	2139
ACBD7	0.194361	1.60491	0.840152	0.408195	0.609927	-5.33137	77	75	80	88
ACCS	-0.0980874	4.64831	-1.16384	0.254662	0.454669	-5.93015	669	726	590	670
ACD	0.108568	4.38438	1.17507	0.250215	0.449546	-5.8343	501	581	543	584
ACE	0.0171026	5.91175	0.271577	0.788011	0.890878	-6.92224	0	0	0	0
ACE	0.0171026	5.91175	0.271577	0.788011	0.890878	-6.92224	1637	1581	1519	1625
ACER2	0.0396118	1.72908	0.178632	0.859559	0.931317	-5.66918	84	91	80	94
ACER3	-0.0767886	5.13062	-1.03613	0.309322	0.512873	-6.21204	894	1042	871	902
ACHE	-0.250214	2.88328	-1.64439	0.111681	0.265994	-4.77609	213	219	162	189
ACIN1	-0.0908201	7.85306	-2.27365	0.0311468	0.110425	-4.90786	6082	6757	5515	6138
ACKR2	-0.912416	2.82052	-5.33151	1.24766e-05	0.000293993	3.20594	286	237	134	132
ACLY	0.0875655	8.6223	2.46608	0.0202941	0.0811181	-4.62654	9794	10772	10039	11085
ACN9	-0.0794669	5.11183	-1.0566	0.300046	0.502923	-6.18564	915	994	882	866
ACO1	0.166869	5.34793	2.20571	0.0360919	0.122799	-4.52225	915	1163	1036	1213
ACO2	-0.0229323	6.64942	-0.424263	0.674732	0.820677	-7.03854	2748	2691	2535	2636
ACOT13	-0.128415	5.07154	-1.73824	0.0935514	0.23554	-5.26964	895	995	814	857
ACOT7	-0.141014	5.91852	-2.33821	0.0270246	0.0995621	-4.40426	1582	1837	1464	1530
ACOT8	-0.0777763	4.19967	-0.792647	0.434887	0.632429	-6.14239	485	530	431	499
ACOT9	-0.163431	4.09316	-1.58312	0.125027	0.286982	-5.21215	448	523	419	419
ACOX1	0.0233565	5.60775	0.353911	0.726152	0.854448	-6.81824	1188	1418	1242	1314
ACOX3	-0.0220276	4.02307	-0.204917	0.839172	0.919892	-6.37836	417	462	434	405
ACP1	0.00526825	7.15907	0.118092	0.906868	0.955154	-7.22598	3677	3996	3522	3924
ACP2	-0.308201	5.1341	-4.17734	0.000275995	0.00329191	0.110853	972	1132	780	861
ACP5	-0.626748	2.54243	-3.55169	0.00142842	0.0114126	-1.00688	178	212	104	141
ACP6	0.527073	3.78247	4.64177	7.95984e-05	0.0012712	1.5459	295	321	396	463
ACPL2	-0.612993	-0.194843	-1.57095	0.12783	0.291448	-4.36065	27	30	20	16
ACRBP	-0.997929	0.00589869	-2.66747	0.0127548	0.0580953	-2.92676	32	44	18	18
ACRC	-0.230469	2.80298	-1.38946	0.176035	0.360367	-5.10105	168	243	159	176
ACRV1	-0.052063	0.227491	-0.149517	0.882256	0.942285	-5.30802	32	31	32	27
ACSF2	-0.120663	2.71728	-0.753116	0.457891	0.653005	-5.7105	171	197	161	166
ACSF3	2.04697e-05	5.91983	0.000349144	0.999724	0.999934	-6.96205	1540	1717	1492	1656
ACSL1	0.192442	3.50988	1.56698	0.128754	0.292608	-5.0639	272	300	310	322
ACSL3	-0.15878	7.3791	-3.67813	0.00102919	0.00885813	-1.61844	4468	4995	3963	4226
ACSL4	0.145387	4.3776	1.57217	0.127548	0.290909	-5.31604	494	569	549	587
ACSL6	-0.540061	1.35514	-1.95491	0.0610097	0.175978	-3.99816	60	112	51	59
ACSM1	0.111655	3.30084	0.789428	0.436734	0.633801	-5.86296	280	232	257	273
ACSM3	0.0499209	7.59379	1.21416	0.235192	0.433296	-6.56857	4901	5309	4911	5305
ACSS1	-0.438837	1.78618	-2.00683	0.054867	0.163649	-3.97852	106	109	72	81
ACSS2	-0.128342	5.24279	-1.68397	0.103704	0.252196	-5.40241	1023	1102	977	907
ACTB	-0.109023	11.1659	-3.67677	0.00103282	0.00887294	-2.10419	59537	68980	56210	58772
ACTBP8	-0.0323974	2.86419	-0.212299	0.833467	0.916186	-6.00762	197	198	179	194
ACTG1	0.142683	9.25889	4.25874	0.000222152	0.00279466	-0.377157	14746	16636	16227	17230
ACTL6A	-0.0660638	6.12334	-1.13367	0.26689	0.468986	-6.3655	1852	1980	1776	1764
ACTL8	0.00235851	3.99102	0.0222272	0.98243	0.991472	-6.38894	423	431	381	446
ACTN1	-0.11415	6.744	-2.31054	0.0287263	0.104232	-4.64134	2911	3086	2501	2859
ACTN2	-0.0256771	3.07697	-0.176085	0.86154	0.93223	-6.08181	206	253	194	242
ACTN4	-0.0936314	8.79459	-2.54845	0.0168147	0.0708722	-4.47673	12206	12450	10723	11617
ACTR10	-0.0644081	4.80312	-0.799352	0.431056	0.629788	-6.33028	723	813	663	757
ACTR1A	0.0134747	6.84698	0.274035	0.786141	0.889914	-7.13375	2851	3320	2907	3106
ACTR1B	-0.169109	5.42176	-2.48241	0.0195553	0.0789583	-3.98944	1206	1236	1029	1070
ACTR2	0.143596	8.65498	3.53459	0.00149288	0.0117723	-2.16093	9386	11301	10676	11351
ACTR3	-0.136236	7.938	-3.36681	0.00229462	0.0162208	-2.4774	6469	7370	5914	6244
ACTR3B	0.202955	4.77642	2.48698	0.0193534	0.0783876	-3.80902	635	740	726	803
ACTR3C	0.0989151	2.35256	0.546312	0.589333	0.758999	-5.73012	120	145	134	140
ACTR5	0.125728	4.57271	1.43256	0.16345	0.343319	-5.57332	577	649	593	701
ACTR6	0.217259	5.21565	2.95341	0.00643523	0.0353676	-2.91266	839	1019	997	1087
ACTR8	0.136875	5.22539	1.94079	0.0627805	0.179063	-4.97423	903	1016	977	1062
ACVR1	0.0142634	3.49012	0.113213	0.910698	0.957161	-6.22248	301	300	266	321
ACVR1B	-0.169126	5.40923	-2.49464	0.0190188	0.0773755	-3.96097	1180	1243	971	1113
ACVR2A	-0.0607446	1.79746	-0.279924	0.781668	0.887969	-5.66734	94	96	82	94
ACVR2B	0.302055	5.74888	4.16138	0.000287979	0.00339289	-0.0649402	1123	1502	1479	1630
ACY1	0.00960592	2.18001	0.0460324	0.963623	0.983684	-5.81829	113	128	141	99
ACYP1	-0.210338	3.07002	-1.40888	0.170274	0.352704	-5.15131	234	252	171	238
ACYP2	-0.445016	2.62969	-2.53423	0.0173731	0.0724798	-3.1827	214	176	131	143
AD000090.2	0.139538	5.53592	2.15004	0.0406591	0.133259	-4.67613	1116	1262	1220	1311
AD000684.2	0.628469	0.272218	1.69798	0.101	0.247933	-4.24689	35	19	31	47
ADA	-0.29782	5.06968	-3.77746	0.000794067	0.00722756	-0.891933	1027	976	751	821
ADAL	-0.00322559	5.20694	-0.0423391	0.96654	0.984496	-6.77174	984	1001	981	936
ADAM10	-0.0721126	6.36307	-1.35908	0.185355	0.371939	-6.14735	2133	2408	2016	2157
ADAM11	0.591101	2.16951	3.05808	0.00497766	0.02936	-2.06619	94	102	142	144
ADAM15	-0.24533	5.46367	-3.54095	0.00146857	0.0116292	-1.57346	1254	1331	953	1159
ADAM17	0.0301421	5.65317	0.455665	0.652271	0.805134	-6.78801	1224	1461	1228	1420
ADAM19	-0.677784	5.32542	-9.35396	5.77947e-10	9.04325e-08	12.8928	1287	1438	837	811
ADAM1A	0.0565718	3.47618	0.44241	0.661713	0.811753	-6.12729	258	331	282	308
ADAM22	0.960608	1.76971	3.79943	0.000749645	0.00692737	-0.512152	88	49	108	138
ADAM8	-0.998801	1.27525	-3.83739	0.000678578	0.00642412	-0.550557	87	96	43	45
ADAM9	0.106192	5.76471	1.62165	0.11649	0.273749	-5.63475	1278	1546	1455	1478
ADAMTS1	0.532547	4.52769	5.99772	2.1203e-06	7.18426e-05	4.93837	509	521	701	739
ADAMTS10	-0.221657	2.82855	-1.42104	0.166741	0.348026	-5.06787	202	210	153	189
ADAMTS13	-0.549913	1.74457	-2.4197	0.0225334	0.0875558	-3.27511	116	102	65	78
ADAMTS14	0.307694	4.60894	3.57974	0.00132854	0.0107802	-1.27313	576	603	659	752
ADAMTS20	-0.13243	2.43164	-0.754796	0.456899	0.652074	-5.62491	142	161	128	139
ADAMTS3	-0.279909	5.80987	-4.57006	9.65057e-05	0.00147523	0.990412	1552	1774	1289	1357
ADAMTS5	0.0535933	0.17343	0.148719	0.882879	0.942747	-5.29729	32	27	23	37
ADAMTS6	-0.321703	2.20725	-1.68071	0.104343	0.253106	-4.55575	126	151	108	106
ADAMTS7	0.649335	0.875844	2.19601	0.0368534	0.12472	-3.59512	39	39	49	71
ADAMTSL4	-0.362088	7.46263	-7.69888	2.7764e-08	2.07872e-06	8.84325	5338	5416	3716	4386
ADAMTSL5	-0.103722	3.48848	-0.813548	0.423014	0.622716	-5.90179	276	352	266	297
ADAR	-0.0676474	8.50865	-1.85296	0.0748379	0.203	-5.77449	9449	10617	8902	9593
ADARB1	0.174274	4.48358	1.95766	0.0606692	0.175432	-4.73097	548	584	579	656
ADAT1	-0.0726101	5.20438	-0.972624	0.339366	0.544408	-6.29591	1035	998	900	966
ADAT2	-0.121406	5.90094	-2.02839	0.0524806	0.159052	-4.98991	1617	1735	1382	1599
ADAT3	0.126905	3.64719	1.03632	0.309236	0.512852	-5.75193	326	319	301	381
ADC	0.251932	1.06578	0.9167	0.367408	0.571611	-5.14685	44	59	56	62
ADCK1	-0.610112	3.90729	-5.56114	6.75218e-06	0.000180136	3.86781	495	501	300	330
ADCK2	0.244497	4.12904	2.33552	0.027186	0.099945	-3.92823	384	484	457	535
ADCK3	0.376003	5.83213	6.13278	1.4862e-06	5.36187e-05	5.10253	1337	1351	1615	1756
ADCK4	-0.0247613	4.44669	-0.25497	0.800677	0.89856	-6.5046	577	607	488	642
ADCK5	-0.509898	4.19919	-4.51622	0.00011151	0.00164152	1.1735	509	680	349	457
ADCY10	-0.294857	2.23456	-1.56096	0.130169	0.294703	-4.72904	134	145	112	108
ADCY10P1	-0.14907	1.77862	-0.672407	0.507034	0.695372	-5.49087	91	102	90	79
ADCY3	0.357339	4.94485	4.6202	8.43489e-05	0.00133331	1.29851	721	741	876	934
ADCY6	0.224182	3.86315	2.01302	0.0541719	0.162236	-4.45263	347	377	369	450
ADCY7	0.315601	5.62395	4.76101	5.77698e-05	0.000975155	1.52988	1203	1174	1361	1496
ADCY9	0.772959	4.47614	8.56785	3.47561e-09	3.81113e-07	11.0936	436	479	718	794
ADD1	-0.129844	7.59534	-3.13498	0.00411368	0.0254949	-2.98525	5176	5707	4552	5063
ADD2	-0.323366	6.69892	-6.53215	5.24865e-07	2.31306e-05	5.99995	3038	3208	2350	2475
ADD3	-0.0492895	6.21815	-0.903783	0.374097	0.577506	-6.61951	1940	2132	1848	1955
ADH5	0.0782694	7.46549	1.83107	0.0781375	0.209339	-5.65724	4516	4730	4560	4876
ADH6	0.464105	0.0496509	1.26035	0.218315	0.41283	-4.68726	27	20	30	32
ADI1	0.098001	6.55235	1.91736	0.0658193	0.185396	-5.33511	2321	2560	2362	2690
ADIPOR1	0.0555501	7.17262	1.24394	0.224203	0.420279	-6.45958	3703	3905	3657	3987
ADIPOR2	0.0977843	6.89897	2.03329	0.0519511	0.158047	-5.20031	3040	3160	3134	3279
ADIRF-AS1	0.472226	0.112438	1.27301	0.213856	0.407622	-4.68295	31	19	30	35
ADK	-0.0399228	5.70095	-0.631765	0.532849	0.716744	-6.70309	1335	1501	1319	1347
ADM2	0.631791	0.24975	1.80199	0.0827134	0.217567	-4.11915	29	22	34	42
ADM5	-0.0225758	2.95891	-0.152255	0.880117	0.941432	-6.04823	204	216	201	199
ADNP	0.145448	7.21634	3.18276	0.00365123	0.0233494	-2.80928	3597	4008	4014	4113
ADNP2	-0.0148889	5.84465	-0.232115	0.818197	0.909023	-6.9156	1400	1717	1408	1567
ADO	0.207165	5.0042	2.62365	0.0141298	0.0625464	-3.58514	732	876	896	897
ADORA2B	-0.136547	2.66051	-0.803545	0.428671	0.627528	-5.65625	164	193	132	184
ADPGK	0.0698309	6.15159	1.25755	0.219314	0.414069	-6.22764	1792	1938	1846	1938
ADPRH	0.142071	2.37877	0.780584	0.441831	0.638736	-5.59164	139	127	130	153
ADPRHL1	-0.419003	1.99759	-1.94599	0.0621237	0.177965	-4.11134	129	118	101	79
ADPRHL2	0.0246098	5.09211	0.316054	0.75439	0.870753	-6.68879	860	961	799	996
ADPRM	0.0944056	1.78063	0.431478	0.669543	0.817428	-5.61319	87	91	83	101
ADRA2C	-0.059005	1.17649	-0.220631	0.827038	0.913631	-5.51249	54	70	50	65
ADRBK1	0.0674387	6.92799	1.38916	0.176125	0.360384	-6.22786	3124	3273	3006	3481
ADRBK2	0.563697	3.28078	3.86827	0.00062567	0.00606338	-0.319081	217	211	335	281
ADRM1	0.14953	7.06596	3.29467	0.00275545	0.0187274	-2.51382	3286	3556	3474	3864
ADSL	0.0312509	7.27637	0.706315	0.486037	0.67754	-6.99979	3873	4380	3941	4205
ADSS	0.0927097	6.40299	1.71867	0.0971123	0.241153	-5.6335	2053	2357	2233	2309
ADSSL1	0.113965	3.06358	0.775236	0.444931	0.641618	-5.80026	210	222	196	258
ADTRP	0.113075	3.1545	0.802722	0.429139	0.627949	-5.8074	205	256	238	243
AEBP1	0.327956	4.73711	4.0132	0.000426787	0.00454739	-0.220862	616	663	749	803
AEBP2	0.114854	4.46469	1.28292	0.210414	0.403729	-5.73242	559	581	571	622
AEN	-0.0100308	7.22339	-0.220697	0.826987	0.913631	-7.21998	3826	4244	3601	4151
AES	-0.13725	7.8425	-3.4084	0.00206377	0.0149922	-2.36174	6312	6629	5402	5977
AF127936.3	-0.00110138	4.94443	-0.0142184	0.98876	0.994689	-6.69598	787	868	793	806
AF127936.5	-0.312769	3.27935	-2.28321	0.0305024	0.108778	-3.80475	276	304	238	215
AF127936.7	0.558283	-0.0769296	1.46266	0.155093	0.332173	-4.48045	16	26	30	29
AF129075.5	0.524899	0.046406	1.40455	0.171546	0.354362	-4.54958	19	27	25	40
AF131216.5	-0.041064	1.40778	-0.165146	0.870058	0.936427	-5.58209	71	73	58	78
AF165138.7	-0.0130259	3.38327	-0.100537	0.92066	0.962362	-6.18972	274	288	273	266
AF277315.13	0.330989	1.63341	1.44508	0.159931	0.339149	-4.74153	68	80	87	93
AFAP1	0.294521	4.17394	2.96149	0.00630961	0.0348666	-2.62023	403	474	499	540
AFAP1-AS1	-0.118856	0.630632	-0.356479	0.72425	0.853219	-5.35037	56	33	40	36
AFF1	0.0591006	7.23233	1.32852	0.195117	0.384491	-6.36486	3829	4090	3893	4081
AFF4	0.180267	6.70874	3.70284	0.000965003	0.00844666	-1.43684	2544	2739	2794	2992
AFG3L1P	-0.095864	5.98868	-1.66473	0.107519	0.259095	-5.62288	1682	1849	1509	1685
AFG3L2	-0.0671709	7.10453	-1.46405	0.154716	0.33149	-6.15902	3580	3997	3421	3566
AFMID	0.271838	5.25989	3.8857	0.000597618	0.00584441	-0.664439	915	959	1049	1138
AFTPH	0.154622	4.76643	1.85838	0.0740391	0.201577	-4.98568	682	703	747	744
AGA	-0.16664	3.56266	-1.35225	0.187505	0.374794	-5.36782	341	332	267	312
AGAP1	0.0707602	5.46021	1.02771	0.313196	0.516615	-6.31186	1098	1214	1066	1285
AGAP3	0.154451	6.94936	3.25392	0.00305396	0.0203101	-2.59078	3070	3229	3174	3608
AGAP4	0.0461294	3.53237	0.368381	0.715459	0.846947	-6.17473	271	343	298	313
AGAP6	0.000110941	5.6691	0.00177005	0.998601	0.999594	-6.89829	1337	1398	1259	1385
AGAP8	-0.438235	-0.159974	-1.14488	0.262297	0.463783	-4.76165	26	29	20	19
AGAP9	0.172565	2.90621	1.14175	0.263572	0.465218	-5.41986	175	204	206	207
AGBL3	0.188329	1.63239	0.792808	0.434795	0.632429	-5.37273	63	95	78	94
AGBL5	0.137899	5.97812	2.33131	0.0274407	0.100757	-4.4326	1559	1670	1705	1730
AGER	-0.167909	2.7562	-1.03961	0.307731	0.51127	-5.47942	201	184	155	175
AGFG1	-0.0483282	7.19975	-1.04328	0.306063	0.509533	-6.69022	3766	4278	3710	3803
AGFG2	-0.112899	3.61345	-0.934205	0.358471	0.563121	-5.83802	319	366	276	337
AGGF1	0.0278927	5.77891	0.455245	0.65257	0.805193	-6.82064	1421	1503	1349	1534
AGK	0.0345536	5.34475	0.480339	0.634852	0.793337	-6.69356	1066	1094	969	1173
AGL	0.0832819	5.92322	1.36781	0.18264	0.368652	-6.03347	1501	1668	1626	1620
AGO1	0.233579	7.25435	5.17932	1.87653e-05	0.000407297	2.34213	3724	3846	4061	4547
AGO2	0.273143	5.92863	4.21194	0.000251691	0.00307191	0.0281167	1529	1453	1614	1867
AGO3	0.0752812	5.55549	1.15961	0.256349	0.456804	-6.19545	1208	1254	1218	1289
AGO4	0.337869	4.25879	3.50631	0.00160568	0.0124224	-1.36803	449	466	525	593
AGPAT1	-0.145198	6.41439	-2.38605	0.0242981	0.0923514	-4.42011	2323	2494	2196	2024
AGPAT2	-0.109258	5.46446	-1.56694	0.128765	0.292608	-5.63904	1209	1258	999	1216
AGPAT3	0.0837623	7.54518	2.01753	0.0536711	0.161326	-5.34499	4644	5116	4772	5225
AGPAT4	0.331296	5.7983	5.22574	1.65673e-05	0.000366798	2.72411	1342	1326	1522	1722
AGPAT5	0.061992	6.83623	1.20666	0.238021	0.436314	-6.43931	2735	3296	2913	3159
AGPAT6	0.0171363	6.36506	0.317946	0.75297	0.869762	-7.01575	2150	2253	2120	2187
AGPAT9	-0.203906	1.71582	-0.851163	0.402158	0.603692	-5.35107	110	81	84	74
AGPS	0.154893	6.77724	3.02868	0.00535166	0.0310789	-3.09111	2557	3047	2860	3161
AGRN	-0.618924	7.23171	-14.0326	6.28605e-14	7.28448e-11	21.8857	4779	5239	3030	3274
AGTPBP1	-0.0342079	4.28053	-0.346164	0.7319	0.8573	-6.42265	515	540	513	485
AGTRAP	-0.129356	5.53647	-1.87662	0.0714071	0.196486	-5.16577	1265	1347	1036	1278
AHCTF1	0.230467	7.91214	5.30124	1.35307e-05	0.000314048	2.57326	5578	6392	6768	6791
AHCTF1P1	0.202489	4.35408	2.16216	0.0396232	0.130927	-4.3239	476	550	534	607
AHCY	0.0333389	8.7374	0.957063	0.347019	0.552233	-7.01083	10861	11829	10819	11622
AHCYL1	0.165203	6.96028	3.57091	0.00135925	0.0109669	-1.81528	3017	3307	3313	3540
AHCYL2	0.37791	3.9954	3.49179	0.00166676	0.0127815	-1.34425	334	421	446	500
AHDC1	0.127855	4.56261	1.46203	0.155265	0.33226	-5.52992	582	632	638	645
AHI1	0.182575	5.01332	2.4345	0.0217954	0.0855158	-3.98179	792	837	862	925
AHNAK	0.114564	6.30822	2.14547	0.0410564	0.134309	-4.86806	1934	2163	2061	2225
AHR	0.311878	1.60972	1.20817	0.237449	0.435515	-5.00335	61	88	65	118
AHRR	0.0954053	2.64918	0.579261	0.56721	0.743572	-5.80116	160	165	170	166
AHSA1	0.316168	7.04916	6.84804	2.33118e-07	1.18482e-05	6.75939	3083	3300	3605	4082
AHSA2	-0.178442	6.22761	-3.26293	0.00298538	0.0199207	-2.42264	2093	2192	1758	1902
AIDA	0.014376	6.07873	0.246287	0.807321	0.903323	-6.96961	1670	1951	1728	1803
AIF1L	0.148232	4.69348	1.78232	0.0859357	0.222857	-5.08924	647	674	669	746
AIFM1	-0.024489	6.27759	-0.444612	0.66014	0.810985	-6.94607	2040	2168	1854	2149
AIFM2	0.109733	4.64358	1.25914	0.218746	0.413388	-5.81791	590	707	624	728
AIG1	1.0832	0.174221	2.94971	0.00649355	0.0356021	-2.45457	26	16	41	43
AIM1	0.64024	4.06351	6.13052	1.49503e-06	5.37848e-05	5.29556	360	359	531	552
AIMP1	0.0298706	6.09559	0.529796	0.60058	0.767591	-6.86115	1731	1910	1688	1906
AIMP2	0.0409977	5.78767	0.638678	0.528409	0.712975	-6.72095	1351	1580	1458	1455
AIP	0.0410811	5.05192	0.545956	0.589575	0.75924	-6.57645	872	886	825	923
AJUBA	0.29141	2.56023	1.65073	0.11037	0.264046	-4.68483	151	136	146	194
AK1	-0.063811	1.70142	-0.272267	0.787486	0.890864	-5.64166	102	78	76	88
AK2	0.0464721	8.62596	1.2835	0.210215	0.403509	-6.63456	10114	10792	9814	11072
AK3	0.182603	4.79209	2.01708	0.0537209	0.161406	-4.71819	612	792	786	751
AK3P3	0.441808	-0.147995	1.1064	0.278307	0.482052	-4.79419	14	29	28	26
AK4	0.0534632	5.46857	0.719039	0.478289	0.671581	-6.58263	1062	1278	1211	1137
AK4P1	0.0112043	2.16226	0.0530021	0.95812	0.980726	-5.8125	114	126	88	152
AK9	-0.073402	2.19314	-0.383669	0.704226	0.840436	-5.75346	113	139	113	118
AKAP1	0.228707	6.28955	4.26959	0.000215812	0.00274053	0.104657	1862	2023	2134	2266
AKAP10	0.164435	4.40627	1.66671	0.107122	0.258273	-5.18342	467	616	574	594
AKAP11	0.0142276	6.63168	0.264605	0.793321	0.893906	-7.09124	2495	2811	2615	2565
AKAP12	-0.2198	6.56893	-4.38566	0.000158232	0.00214561	0.354739	2633	2877	2187	2386
AKAP13	0.112139	6.01133	1.87741	0.0712958	0.196426	-5.28198	1528	1816	1651	1838
AKAP17A	0.112129	5.98102	1.94943	0.0616921	0.177139	-5.15017	1573	1693	1647	1765
AKAP5	0.165273	1.03776	0.587833	0.561525	0.738413	-5.35036	49	54	63	50
AKAP6	0.0940694	1.33715	0.369484	0.714647	0.846646	-5.51499	69	62	60	75
AKAP7	-0.194524	1.58141	-0.806417	0.427042	0.626039	-5.34941	78	93	82	64
AKAP8	-0.0117938	6.2472	-0.217483	0.829465	0.914698	-7.0161	1997	2103	1885	2046
AKAP8L	-0.107634	6.47677	-2.10351	0.044867	0.143077	-4.98338	2380	2591	2151	2308
AKAP9	0.0812623	6.5951	1.6068	0.119721	0.279408	-5.8493	2365	2694	2480	2690
AKIP1	-0.118332	4.60889	-1.37131	0.18156	0.367553	-5.66543	636	731	599	618
AKIRIN1	-0.0494178	7.10088	-1.07543	0.291689	0.49489	-6.63803	3597	3915	3274	3748
AKIRIN2	-0.13846	5.99947	-2.3361	0.0271513	0.099844	-4.42744	1737	1874	1457	1718
AKNA	-0.121486	1.64799	-0.524737	0.604044	0.770267	-5.53506	92	83	79	76
AKR1A1	-0.142126	5.75652	-2.21568	0.0353249	0.12072	-4.60551	1390	1671	1293	1383
AKR1C1	0.131396	6.32613	2.47228	0.0200106	0.0803346	-4.22452	1948	2176	2097	2268
AKR1C2	-0.0204524	4.72723	-0.248294	0.805784	0.902546	-6.59735	686	747	673	693
AKR1C3	-0.0712233	4.85571	-0.845391	0.405315	0.607221	-6.30872	707	896	698	772
AKR1E2	0.191593	2.60298	1.12842	0.26906	0.471117	-5.34706	159	146	169	167
AKR7A2	-0.128597	5.40526	-1.89422	0.0689447	0.191795	-5.10169	1133	1251	978	1131
AKR7A2P1	-1.21177	-0.262147	-2.9082	0.00718292	0.0381937	-2.6233	31	36	19	10
AKR7A3	-0.233193	0.618572	-0.723268	0.475729	0.670133	-5.18514	52	38	31	42
AKR7L	0.164256	0.20139	0.454538	0.653071	0.805436	-5.23036	36	23	31	31
AKT1	0.113057	6.71484	2.25189	0.0326598	0.114276	-4.75126	2522	2918	2687	2996
AKT1S1	0.0943143	6.71668	1.92438	0.0648958	0.183478	-5.35757	2573	2905	2707	2943
AKT2	-0.00829379	7.27335	-0.177325	0.860576	0.931936	-7.238	4108	4235	3705	4325
AKT3	-0.503328	0.196328	-1.39514	0.174334	0.358291	-4.5736	29	45	20	30
AKTIP	0.366454	2.55386	2.14427	0.041161	0.134588	-3.89322	124	154	171	175
AL021068.1	0.232958	0.788491	0.773402	0.445997	0.642461	-5.18953	35	51	43	54
AL031320.1	-0.0117344	2.16378	-0.0612231	0.951632	0.978183	-5.81249	118	123	109	122
AL049840.1	-0.151755	0.25633	-0.411599	0.68388	0.825979	-5.25528	45	25	25	33
AL109763.2	0.100878	4.07654	0.993095	0.329473	0.533454	-5.92804	425	450	437	470
AL117190.3	-0.283891	0.216938	-0.814195	0.42265	0.622498	-5.05553	31	37	29	25
AL118506.1	0.249037	0.23849	0.682364	0.500816	0.689371	-5.13616	36	23	26	41
AL132709.5	-0.0563467	2.4476	-0.322918	0.749242	0.86766	-5.85082	144	154	136	141
AL132709.8	-0.130102	0.777245	-0.430126	0.670515	0.817953	-5.35868	53	43	43	41
AL133493.2	0.137409	2.93548	0.883009	0.385019	0.587784	-5.6755	212	181	203	212
AL136419.6	0.195967	0.221091	0.565237	0.576575	0.750845	-5.18991	25	33	30	34
AL161915.1	0.149	0.72989	0.470533	0.64175	0.798282	-5.33324	36	48	55	37
AL353898.3	0.708278	0.371623	2.0885	0.046305	0.146212	-3.74418	23	31	36	50
AL354822.1	-0.0927739	3.67937	-0.674735	0.505576	0.694008	-6.06267	356	352	373	279
AL356585.1	-0.0475646	3.73398	-0.415925	0.680749	0.823913	-6.21995	355	371	334	345
AL356585.2	0.250789	0.618246	0.794829	0.433638	0.63148	-5.14167	41	34	45	41
AL356585.3	0.32094	2.05022	1.58942	0.123598	0.285301	-4.64793	88	111	120	120
AL357673.1	0.261264	3.58348	2.06061	0.0490852	0.151801	-4.29163	289	300	294	392
AL589743.1	0.491706	5.90488	7.51803	4.33168e-08	2.89793e-06	8.60171	1285	1430	1896	1799
AL590431.1	-0.114159	0.745808	-0.351075	0.728254	0.855693	-5.37747	52	42	29	58
AL591025.1	0.27549	0.848649	0.94003	0.355529	0.560205	-5.08426	45	42	53	49
AL592183.1	0.130777	5.18059	1.74762	0.0918848	0.232906	-5.2854	918	943	995	976
AL592188.7	-1.06206	1.98274	-2.9709	0.00616623	0.0343072	-2.23495	267	90	59	82
AL592284.1	0.138448	1.28578	0.543526	0.591223	0.760374	-5.43185	61	63	62	70
AL627309.1	-0.242765	5.79601	-3.92396	0.000540305	0.00539126	-0.685363	1580	1667	1315	1338
AL645728.1	0.136516	1.26847	0.52546	0.603548	0.769906	-5.436	66	57	64	66
AL672183.2	-0.378047	2.47191	-2.17112	0.0388722	0.129443	-3.82825	161	178	125	127
AL773604.8	-0.249288	1.40116	-1.01055	0.321194	0.525829	-5.14358	71	83	62	63
ALAD	-0.280537	5.15487	-3.82595	0.00069927	0.00659758	-0.79021	1019	1090	836	843
ALAS1	-0.0852784	5.21564	-1.18603	0.245932	0.445537	-6.07312	1009	1049	871	1005
ALAS2	0.0130743	7.18025	0.284217	0.77841	0.886498	-7.19549	3808	3951	3711	3857
ALDH16A1	-0.141386	6.10735	-2.52931	0.0175701	0.0731046	-4.05638	1847	2048	1624	1789
ALDH18A1	0.335649	6.69425	6.85842	2.27027e-07	1.15809e-05	6.83807	2383	2573	2925	3120
ALDH1A2	0.180226	4.2191	1.78324	0.0857826	0.222626	-4.9433	417	527	500	531
ALDH1B1	0.0596426	6.27091	1.07949	0.289909	0.493554	-6.45888	1907	2162	2019	2078
ALDH1L2	-0.11817	0.676058	-0.373624	0.711599	0.844706	-5.35526	34	57	39	40
ALDH2	-0.0896545	4.90637	-1.13244	0.267399	0.469347	-6.04465	771	895	702	811
ALDH3A2	-0.187259	3.94939	-1.74283	0.0927325	0.234191	-4.92669	411	475	373	379
ALDH4A1	-0.122073	3.82946	-1.06269	0.297325	0.500287	-5.78086	404	392	360	347
ALDH5A1	0.112149	5.9474	1.88518	0.0702007	0.194357	-5.25356	1581	1610	1576	1758
ALDH6A1	0.180011	3.78323	1.6043	0.120272	0.280178	-5.08937	326	369	369	392
ALDH9A1	0.079664	6.27097	1.39974	0.172966	0.356373	-6.07275	1946	2090	2076	2049
ALDOA	-0.114424	10.2912	-3.93236	0.000528459	0.00531743	-1.34978	33110	37050	30037	32574
ALDOC	-0.224612	4.10836	-2.21418	0.035439	0.12095	-4.15457	490	511	408	420
ALG1	-0.0800672	5.17269	-1.12116	0.272082	0.474813	-6.13404	946	1048	876	947
ALG10	0.339914	3.43117	2.6513	0.013247	0.0596049	-3.11222	249	265	320	310
ALG10B	0.0841872	3.41106	0.655987	0.517379	0.704027	-5.99123	281	274	268	300
ALG11	0.0412604	3.40333	0.325367	0.747409	0.867151	-6.14863	270	290	265	292
ALG12	-0.10079	3.38194	-0.785305	0.439106	0.635719	-5.89076	278	302	242	281
ALG13	-0.00493689	5.14244	-0.0660724	0.947807	0.97663	-6.75211	865	1042	874	960
ALG14	-0.207351	2.883	-1.36274	0.184213	0.370823	-5.15699	202	223	179	177
ALG1L13P	0.293412	1.62997	1.23944	0.22584	0.422345	-4.97523	64	87	76	103
ALG1L6P	0.495496	1.95725	2.3957	0.0237798	0.0908276	-3.34259	85	90	110	129
ALG1L9P	0.64607	0.130807	1.76601	0.0886909	0.227586	-4.15763	28	19	36	34
ALG2	0.129698	5.30802	1.76722	0.0884842	0.227181	-5.28823	913	1130	1052	1103
ALG3	0.0824706	6.11536	1.44232	0.160701	0.340111	-5.97893	1700	1927	1728	1985
ALG5	-0.134366	4.72233	-1.48189	0.149936	0.324074	-5.5511	646	850	638	673
ALG6	0.0255464	4.02988	0.243778	0.809244	0.904271	-6.37187	438	432	408	447
ALG8	-0.0166741	6.33099	-0.305808	0.762094	0.876354	-7.01175	2106	2245	2061	2097
ALG9	-0.0447434	3.3667	-0.324482	0.748071	0.867469	-6.13713	241	327	237	293
ALG9	-0.0447434	3.3667	-0.324482	0.748071	0.867469	-6.13713	0	0	0	0
ALKBH1	-0.0922325	3.97328	-0.792165	0.435163	0.632573	-6.07049	393	483	337	461
ALKBH2	0.0150662	4.77703	0.174486	0.862784	0.932859	-6.62902	742	726	644	791
ALKBH3	-0.208708	4.82928	-2.56269	0.0162725	0.0691309	-3.66529	809	832	685	688
ALKBH4	0.235505	4.35335	2.34114	0.0268502	0.0990505	-3.98077	506	508	503	655
ALKBH5	0.0958458	6.09408	1.66824	0.106814	0.25762	-5.6426	1722	1832	1701	1974
ALKBH6	0.0824827	2.26933	0.422208	0.676213	0.821411	-5.76217	130	122	106	154
ALKBH7	-0.169406	4.81278	-2.03841	0.0514026	0.156843	-4.6851	741	865	627	754
ALKBH8	-0.0240425	4.53554	-0.266076	0.7922	0.893439	-6.53075	610	645	609	586
ALMS1	0.0533931	5.44083	0.773885	0.445716	0.642352	-6.5341	1155	1137	1111	1186
ALMS1-IT1	-0.38117	1.38762	-1.43887	0.161669	0.341012	-4.69909	69	91	72	49
ALOX12	0.292525	2.01123	1.44687	0.159433	0.338661	-4.82473	91	104	113	118
ALOX12P2	-0.612186	0.21474	-1.74798	0.0918222	0.232906	-4.18319	37	39	26	22
ALOX5	-0.368788	2.29625	-1.97524	0.0585364	0.171256	-4.12398	134	166	112	112
ALPK1	-0.753141	1.89401	-3.52821	0.00151763	0.0119001	-1.07594	119	140	70	78
ALS2	-0.115611	5.44465	-1.67927	0.104627	0.253617	-5.46363	1221	1215	1062	1110
ALS2CR12	-0.488919	-0.13459	-1.2848	0.209766	0.402813	-4.64471	27	30	20	19
ALX4	0.395713	0.589989	1.19	0.244397	0.443796	-4.82529	25	48	38	52
ALYREF	-0.116947	7.51441	-2.55309	0.0166364	0.0702909	-4.28346	4821	5431	4175	4976
AMACR	0.649777	0.182686	1.85029	0.0752338	0.203913	-4.0562	21	27	35	38
AMBRA1	-0.0207303	5.97353	-0.348931	0.729845	0.856355	-6.91273	1652	1752	1497	1750
AMD1	0.33095	8.07886	8.14067	9.53449e-09	8.85182e-07	9.84954	6135	6833	7807	7950
AMDHD2	-0.392749	4.45456	-4.19877	0.000260683	0.00315402	0.31458	677	672	499	494
AMER1	0.465658	3.8502	4.23394	0.000237346	0.00294065	0.509339	314	345	427	453
AMFR	0.0535399	6.8487	1.12954	0.268594	0.470496	-6.53017	2882	3204	2942	3161
AMH	-0.304412	5.17884	-4.19941	0.000260239	0.00315138	0.157889	1026	1140	786	910
AMHR2	-1.96772	2.86197	-11.6369	4.93334e-12	1.80794e-09	15.0324	377	395	92	98
AMIGO1	0.758998	3.13414	4.82157	4.90892e-05	0.000856394	2.01581	205	160	310	282
AMIGO2	0.191092	5.59116	2.85586	0.00815139	0.0418262	-3.22568	1214	1210	1324	1350
AMMECR1	0.0574425	6.30098	1.06936	0.294368	0.497074	-6.47655	1992	2163	2042	2137
AMMECR1L	0.187263	5.69523	3.01279	0.00556482	0.0319438	-2.89328	1236	1375	1396	1477
AMN1	0.137187	1.39526	0.542233	0.592102	0.761016	-5.46016	75	60	68	74
AMOTL1	0.137411	8.00252	3.17345	0.00373731	0.0237652	-2.95385	6505	6634	6960	7010
AMPD2	0.117021	6.43754	2.13504	0.0419754	0.136545	-4.91624	2239	2234	2294	2393
AMPD3	0.00254048	4.63308	0.0298604	0.976398	0.988896	-6.59809	619	715	617	674
AMT	-0.137638	0.100975	-0.370305	0.714041	0.846276	-5.23783	37	24	27	25
AMZ2	0.220123	5.37614	3.16324	0.00383381	0.0241859	-2.46599	1036	1032	1130	1197
AMZ2P1	-0.130856	2.52617	-0.738064	0.466837	0.661513	-5.66434	162	162	120	168
ANAPC1	0.0902854	7.67237	2.11314	0.0439652	0.141009	-5.18917	4926	5723	5289	5653
ANAPC10	0.193159	4.15027	1.84313	0.0763036	0.206167	-4.82508	421	470	515	473
ANAPC11	-0.148397	6.17096	-2.55168	0.0166902	0.0704541	-4.02346	1912	2173	1629	1937
ANAPC13	0.0193191	5.83862	0.324147	0.748322	0.867469	-6.88788	1477	1579	1429	1565
ANAPC15	0.0281397	3.17535	0.20208	0.841368	0.921284	-6.10848	215	267	225	249
ANAPC16	-0.0337151	6.32037	-0.591885	0.558847	0.735656	-6.87816	2016	2335	2056	2050
ANAPC2	-0.0909161	6.45338	-1.7624	0.0893099	0.228711	-5.57397	2358	2504	2110	2303
ANAPC4	-0.0741298	6.17147	-1.32158	0.197386	0.387131	-6.15197	1850	2131	1762	1890
ANAPC5	0.0247489	8.10919	0.640511	0.527234	0.71236	-7.17724	7179	7539	6903	7575
ANAPC7	-0.0442261	7.11675	-0.984332	0.333683	0.538125	-6.73415	3618	3961	3440	3663
ANGEL1	0.232415	5.15219	3.22633	0.0032734	0.021462	-2.26198	858	905	964	1038
ANGEL2	0.0152733	5.599	0.241192	0.811227	0.905122	-6.85023	1243	1349	1216	1316
ANGPT1	0.0265637	4.87841	0.338037	0.737947	0.86134	-6.61783	730	838	741	802
ANGPTL4	-0.943375	0.738976	-3.08395	0.00466924	0.0280759	-2.1149	56	68	27	35
ANK1	0.130685	8.86115	3.73903	0.000878025	0.00786832	-1.67302	11665	12226	12171	13116
ANK3	-0.231914	4.15075	-2.09281	0.0458876	0.145367	-4.39091	560	479	408	441
ANKAR	0.0866733	1.27432	0.333054	0.741664	0.863582	-5.51012	54	72	67	62
ANKDD1A	0.198077	3.13472	1.4277	0.164832	0.345232	-5.14657	211	229	235	253
ANKEF1	-0.176397	3.28495	-1.28283	0.210446	0.403729	-5.37098	243	317	222	255
ANKFY1	-0.0954141	6.31247	-1.71681	0.0974562	0.241877	-5.61585	2207	2209	1916	2078
ANKH	0.268355	5.10138	3.6735	0.00104166	0.00893525	-1.16107	795	887	941	1017
ANKHD1	0.266666	2.64129	1.56591	0.129006	0.292786	-4.82504	134	172	186	170
ANKHD1-EIF4EBP3	-0.392242	0.275706	-1.08694	0.286661	0.490302	-4.86695	31	43	35	21
ANKIB1	0.0689052	5.48535	1.00298	0.324767	0.529219	-6.34329	1066	1292	1151	1235
ANKLE1	0.575051	4.52395	6.48127	5.98756e-07	2.57354e-05	6.16044	476	537	713	746
ANKLE2	0.059689	7.13126	1.31641	0.199094	0.38932	-6.36179	3491	3896	3624	3814
ANKMY1	-0.0546538	4.84215	-0.679145	0.502821	0.69148	-6.43117	785	786	702	759
ANKMY2	-0.077314	5.59626	-1.18568	0.24607	0.445673	-6.17582	1242	1434	1144	1307
ANKRA2	0.0121653	3.5094	0.096994	0.923447	0.963677	-6.2303	288	322	265	331
ANKRD10	-0.0330147	5.76895	-0.514537	0.611059	0.775358	-6.78869	1408	1561	1271	1539
ANKRD10-IT1	0.619579	2.5641	3.43851	0.00191087	0.0141622	-1.26284	107	151	201	181
ANKRD11	0.162644	8.09236	4.21128	0.000252136	0.00307229	-0.34969	6758	7110	7195	7813
ANKRD12	0.0911648	5.29187	1.24973	0.222112	0.417652	-6.01929	967	1072	1070	1032
ANKRD13A	-0.141448	5.90863	-2.37818	0.0247289	0.0934785	-4.32172	1585	1810	1441	1532
ANKRD13B	0.860849	4.51635	9.32084	6.22296e-10	9.31839e-08	12.7271	468	445	771	829
ANKRD13C	-0.00293483	4.73429	-0.0326287	0.97421	0.987974	-6.63045	624	818	647	738
ANKRD13D	-0.0755284	4.96555	-0.908393	0.3717	0.57572	-6.28675	811	917	694	897
ANKRD16	0.106199	3.64881	0.891746	0.3804	0.583356	-5.8872	304	345	342	334
ANKRD17	0.150889	8.03185	3.88309	0.000601729	0.00586402	-1.19354	6469	6884	6937	7393
ANKRD18B	-0.0534626	2.85484	-0.341472	0.735389	0.860157	-5.96977	178	218	190	179
ANKRD18DP	-0.426199	1.23387	-1.42294	0.166195	0.347199	-4.68929	59	88	73	38
ANKRD18EP	-0.135111	3.07394	-0.926824	0.362221	0.566666	-5.67904	246	228	206	210
ANKRD19P	0.111798	0.578591	0.334436	0.740632	0.862916	-5.34568	49	30	34	46
ANKRD20A11P	-0.532241	1.99243	-2.5435	0.0170074	0.0714888	-3.07324	131	126	74	98
ANKRD20A14P	-0.137794	4.40068	-1.46834	0.153557	0.329751	-5.46988	578	611	531	515
ANKRD20A2	0.716532	0.224616	2.04285	0.0509323	0.155715	-3.80643	25	23	41	36
ANKRD20A3	0.256329	0.841655	0.871806	0.390994	0.593393	-5.13364	37	51	50	51
ANKRD20A5P	-0.446188	3.43752	-3.48923	0.00167776	0.0128236	-1.24386	341	338	234	247
ANKRD20A9P	-0.278855	1.96426	-1.34685	0.189215	0.377171	-4.9336	116	114	92	91
ANKRD26	0.16157	5.25809	2.29737	0.0295703	0.106407	-4.32119	943	1001	1031	1071
ANKRD27	0.0816334	5.7061	1.27527	0.213069	0.40682	-6.0974	1284	1448	1283	1514
ANKRD28	-0.0274223	6.3652	-0.52129	0.60641	0.771714	-6.92842	2119	2358	2030	2215
ANKRD32	0.147859	4.33196	1.54688	0.133523	0.298898	-5.33858	468	563	516	587
ANKRD33B	-0.110225	1.62667	-0.46305	0.647036	0.801657	-5.55676	95	78	67	87
ANKRD34A	-0.19201	1.9455	-0.91323	0.369197	0.572863	-5.36381	96	126	86	101
ANKRD36	-0.0551338	3.33659	-0.35817	0.722999	0.852738	-6.11603	327	235	250	262
ANKRD36B	-0.0848043	2.76439	-0.501944	0.619772	0.781562	-5.87606	155	226	155	189
ANKRD36C	0.12079	2.81385	0.773166	0.446134	0.642555	-5.72549	184	178	178	202
ANKRD37	0.175842	1.94391	0.8256	0.41626	0.616771	-5.43317	107	88	101	110
ANKRD39	0.0527051	3.51959	0.407151	0.687104	0.82795	-6.15578	322	285	278	328
ANKRD40	0.00746241	5.81538	0.117202	0.907567	0.955459	-6.92881	1414	1606	1481	1454
ANKRD42	0.229226	4.69268	2.74922	0.0105183	0.0504398	-3.22966	602	683	685	771
ANKRD46	0.154312	4.64751	1.82545	0.0790047	0.210705	-5.00476	617	659	675	698
ANKRD49	-0.0871063	4.27901	-0.902762	0.374628	0.577978	-6.07581	522	552	490	488
ANKRD50	-0.00335008	5.15676	-0.045487	0.964054	0.983835	-6.75736	896	1027	856	999
ANKRD52	0.2324	7.42132	5.28121	1.4277e-05	0.000325937	2.58845	4205	4296	4618	5037
ANKRD54	0.118794	5.15716	1.60513	0.120089	0.279897	-5.50012	922	918	943	987
ANKRD55	-0.329759	1.04637	-1.15832	0.256865	0.457402	-4.93385	63	61	37	60
ANKRD6	-0.0257997	3.69833	-0.213894	0.832235	0.915965	-6.27222	344	358	351	318
ANKRD61	-0.0601074	2.28193	-0.321001	0.750679	0.868412	-5.80124	118	149	124	123
ANKRD9	-0.103423	3.46599	-0.770478	0.4477	0.644077	-5.92806	264	355	286	269
ANKS1A	0.25271	5.75959	4.1024	0.000336872	0.00380477	-0.220079	1259	1410	1504	1569
ANKS3	0.133043	4.84919	1.53268	0.136978	0.304284	-5.51827	772	711	716	853
ANKS6	0.239269	6.4049	4.56597	9.75722e-05	0.00148664	0.860651	2038	2154	2316	2467
ANKZF1	0.0299146	5.69923	0.475677	0.638127	0.795975	-6.79051	1309	1458	1269	1463
ANLN	-0.245303	6.73674	-4.89777	3.99925e-05	0.000731847	1.67931	2922	3326	2501	2590
ANO10	0.0644353	5.27018	0.878651	0.387336	0.589835	-6.40094	1033	996	993	1055
ANO3	-0.219863	0.386178	-0.664378	0.512078	0.699343	-5.17277	34	41	31	31
ANO5	0.129819	3.99429	1.18098	0.247901	0.447487	-5.70497	358	465	422	445
ANO6	0.162365	5.32031	2.30979	0.0287742	0.104361	-4.31298	972	1057	1097	1099
ANO7	0.736442	2.15007	3.77382	0.000801672	0.00727513	-0.517303	89	95	139	158
ANO7P1	1.0742	0.125576	2.91624	0.00704416	0.0376698	-2.5188	16	24	45	37
ANO8	-0.102208	4.31782	-1.02753	0.31328	0.516615	-5.9702	575	536	495	503
ANO9	-0.498162	0.17127	-1.3243	0.196495	0.386006	-4.64059	28	45	17	34
ANP32A	0.0143507	7.91542	0.358767	0.722557	0.852686	-7.29286	6125	6802	5928	6696
ANP32B	0.0618324	9.16981	1.73526	0.0940861	0.23639	-6.0593	14179	16181	14273	16361
ANP32E	0.0159718	7.62969	0.370148	0.714157	0.846341	-7.24465	4900	5711	4928	5430
ANPEP	-0.466124	1.99645	-2.19549	0.0368945	0.124805	-3.69979	112	141	73	105
ANTXR1	-0.0288475	4.11544	-0.269294	0.789749	0.891905	-6.39287	471	468	466	426
ANTXR2	0.104335	5.97779	1.77541	0.0870938	0.224885	-5.44434	1590	1676	1672	1722
ANXA1	-0.031557	7.0091	-0.68693	0.497979	0.686756	-6.96335	3345	3660	3132	3494
ANXA11	-0.196246	7.06591	-4.34152	0.000178068	0.00235496	0.148065	3690	4023	3111	3396
ANXA2	-0.248118	6.92798	-5.27416	1.45495e-05	0.000328922	2.64871	3399	3737	2835	2971
ANXA2P2	-0.409524	2.69811	-2.50814	0.018442	0.0756698	-3.24644	182	220	145	147
ANXA2R	-0.144758	2.75474	-0.89903	0.376577	0.579664	-5.60725	188	192	173	160
ANXA4	0.362751	1.20712	1.33751	0.192204	0.380961	-4.78154	43	68	61	75
ANXA5	0.0143603	6.41943	0.274256	0.785973	0.889914	-7.04134	2156	2426	2166	2305
ANXA6	-0.435785	6.04053	-7.52328	4.27583e-08	2.87975e-06	8.59821	2018	2098	1386	1556
ANXA7	-0.0456281	7.24027	-1.02383	0.314991	0.5182	-6.71754	3884	4384	3662	4079
ANXA9	-0.232734	2.15384	-1.17932	0.24855	0.448124	-5.16926	129	130	91	123
AOC2	0.379344	1.45885	1.52151	0.139747	0.30883	-4.61277	65	64	67	97
AP000254.8	0.0687167	0.677703	0.216062	0.830562	0.915353	-5.39454	37	46	51	35
AP000347.2	-0.255378	1.25896	-0.950817	0.350123	0.555143	-5.16156	58	83	63	51
AP000350.4	0.0834163	1.00798	0.288884	0.774875	0.884573	-5.45591	40	67	52	55
AP000350.5	0.288871	2.05772	1.39325	0.174898	0.35892	-4.90225	110	93	104	135
AP000351.10	-0.132013	0.906956	-0.443714	0.660781	0.811403	-5.38311	50	55	35	60
AP000442.1	-1.12147	-0.0268282	-2.96944	0.00618828	0.0343887	-2.47201	38	39	14	20
AP000472.2	0.212735	0.21016	0.608578	0.547885	0.727484	-5.16799	25	32	34	30
AP000487.5	-0.0608154	1.01685	-0.219585	0.827844	0.913805	-5.47312	54	56	52	50
AP000525.10	0.127986	1.17516	0.476562	0.637504	0.795652	-5.43434	51	65	52	71
AP000525.9	0.475931	4.70347	5.63874	5.49061e-06	0.000151111	3.99575	551	637	787	810
AP000705.7	0.139319	0.875792	0.483193	0.63285	0.791688	-5.36086	47	46	49	50
AP001053.11	-0.0168	0.938647	-0.0568977	0.955045	0.979862	-5.47364	60	44	52	46
AP001062.7	0.341748	1.74089	1.5222	0.139575	0.308625	-4.66797	68	92	94	101
AP001065.15	0.149646	3.34254	1.10775	0.277733	0.481418	-5.58594	237	280	291	265
AP001171.1	-0.378191	2.18858	-1.77485	0.0871889	0.224885	-4.41287	134	146	76	139
AP001205.1	-0.0682738	0.712069	-0.217042	0.829806	0.914809	-5.40201	41	48	50	34
AP001347.6	-0.0675251	-0.0186023	-0.17981	0.858643	0.930904	-5.25555	31	23	25	24
AP001372.2	0.040053	1.6232	0.171545	0.865073	0.933889	-5.64025	79	83	87	75
AP001432.14	0.0153747	0.0631763	0.0424241	0.966473	0.984496	-5.2833	28	27	23	31
AP001462.6	0.248602	0.0714043	0.665635	0.511286	0.698727	-5.11497	22	29	36	24
AP001469.9	0.0139017	1.79472	0.0610932	0.951735	0.978217	-5.70115	100	86	75	107
AP001601.2	-0.00239663	0.58222	-0.00749044	0.994079	0.997494	-5.39256	32	49	39	38
AP001628.6	-0.0503007	1.95535	-0.234894	0.816062	0.90807	-5.72474	115	97	103	94
AP001877.1	-0.466105	0.685113	-1.47979	0.150492	0.324771	-4.54027	51	50	27	45
AP003068.23	0.00912156	2.30148	0.0475168	0.962451	0.983415	-5.85539	110	156	132	125
AP003900.6	-0.00561598	1.25711	-0.021723	0.982828	0.99173	-5.55446	66	62	57	66
AP006216.11	-0.0947718	0.494705	-0.293303	0.771531	0.88242	-5.33801	33	45	34	36
AP006222.2	-0.706197	3.86212	-6.00385	2.0863e-06	7.10363e-05	4.97612	509	488	307	284
AP006621.1	0.530147	2.06335	2.52653	0.0176823	0.0733525	-3.11384	80	107	142	120
AP006621.5	0.0530344	1.66369	0.232897	0.817596	0.908696	-5.64034	74	93	80	87
AP1AR	0.0503634	4.90421	0.572034	0.572027	0.747212	-6.51782	712	872	832	756
AP1B1	-0.116883	7.03044	-2.54265	0.0170406	0.0715427	-4.22092	3485	3839	3076	3454
AP1G1	0.0139096	7.17554	0.30458	0.763019	0.877006	-7.18845	3797	3935	3676	3870
AP1G2	-0.175631	4.08939	-1.5724	0.127494	0.290871	-5.22636	516	460	372	461
AP1M1	-0.182885	5.88646	-3.06596	0.00488173	0.0290402	-2.81351	1649	1740	1354	1533
AP1S1	-0.00887083	5.16725	-0.123999	0.902234	0.952528	-6.75353	929	1009	881	981
AP1S2	0.00756462	4.43808	0.0813499	0.935763	0.969817	-6.5315	524	641	549	581
AP1S3	0.20563	2.76322	1.30805	0.201874	0.392496	-5.19101	161	178	184	194
AP2A1	-0.242864	8.04391	-6.30206	9.54225e-07	3.79672e-05	5.21208	7338	8106	6066	6545
AP2A2	-0.123335	6.12002	-2.08022	0.0471147	0.14779	-4.94678	1911	1988	1743	1719
AP2B1	0.0295236	8.76089	0.852096	0.401649	0.603318	-7.10933	11047	12048	10894	11891
AP2M1	-0.0907553	8.03747	-2.32083	0.028083	0.102431	-4.84103	7116	7460	6312	6923
AP2S1	-0.156903	6.50957	-2.96531	0.006251	0.0346462	-3.18278	2524	2650	2074	2417
AP3B1	-0.0641181	6.27267	-1.12708	0.269619	0.471875	-6.40748	2053	2194	1978	1951
AP3B2	-0.0833134	1.46867	-0.338589	0.737536	0.861083	-5.55905	82	71	62	77
AP3D1	0.0431712	7.899	1.08832	0.286065	0.489524	-6.75816	6146	6495	6074	6517
AP3M1	0.0826465	7.38257	1.9146	0.0661852	0.186163	-5.50036	4254	4463	4284	4640
AP3M2	0.178815	5.32067	2.54898	0.0167944	0.0708294	-3.82578	937	1084	1087	1123
AP3S1	-0.00243035	5.01591	-0.0323372	0.974441	0.988051	-6.71687	822	920	791	890
AP3S2	0.139975	4.49694	1.55094	0.132549	0.29777	-5.38398	539	619	566	668
AP4B1	-0.0633204	4.94621	-0.810165	0.424922	0.624205	-6.36511	777	920	755	813
AP4E1	0.144913	5.61001	1.92838	0.0643738	0.182395	-5.096	1077	1441	1258	1417
AP4M1	-0.0233045	3.65792	-0.188498	0.851894	0.926762	-6.26445	358	326	329	320
AP4S1	-0.243742	2.04526	-1.20395	0.239047	0.437447	-5.1144	125	116	92	104
AP5B1	0.231688	4.76797	2.7968	0.00939189	0.0461998	-3.14629	670	682	709	826
AP5M1	0.104102	5.08878	1.40089	0.172625	0.355996	-5.77043	838	928	849	987
AP5S1	-0.146638	4.37637	-1.59066	0.123316	0.284746	-5.28781	558	617	482	544
AP5Z1	-0.215272	6.29287	-3.97873	0.000467543	0.00488814	-0.649535	2135	2410	1836	1946
APAF1	0.120045	4.44281	1.28239	0.210596	0.403961	-5.72614	576	546	564	612
APBA2	0.263285	5.40226	3.67096	0.00104855	0.00895993	-1.23748	1005	1072	1081	1335
APBA3	0.186571	4.39033	1.99039	0.05675	0.16765	-4.64569	526	531	535	628
APBB1	0.295194	2.18029	1.54526	0.133913	0.299385	-4.73819	104	115	128	132
APBB2	-0.245655	3.40934	-1.93209	0.0638944	0.181441	-4.46549	304	317	244	262
APBB3	-0.12176	3.98189	-1.15742	0.257228	0.457814	-5.72701	433	452	382	404
APC	-0.0256361	6.97878	-0.547548	0.588496	0.758552	-7.04493	3258	3585	3185	3311
APC2	-0.0308024	3.77994	-0.274232	0.785991	0.889914	-6.28351	360	386	330	376
APEH	-0.0957035	7.39969	-2.13514	0.0419672	0.136545	-5.10315	4392	5008	3956	4548
APEX1	-0.0249374	7.21867	-0.497024	0.623192	0.784807	-7.11732	3946	4136	3461	4241
APEX2	-0.0197238	5.27335	-0.277685	0.783367	0.888979	-6.75194	988	1105	994	1002
APH1A	0.0267572	6.77181	0.537927	0.59503	0.7633	-7.00866	2731	3098	2673	3068
APH1B	-0.247046	3.77659	-2.1941	0.0370049	0.124971	-4.1003	391	411	309	344
API5	0.114246	7.74296	2.64053	0.0135844	0.0606747	-4.13201	5246	5828	5777	5804
APIP	0.0417981	5.39839	0.567513	0.57505	0.749686	-6.66199	1008	1232	1125	1101
APITD1	-0.0110964	2.99517	-0.0756326	0.940268	0.972682	-6.06832	205	225	187	226
APLNR	-0.58644	0.81738	-1.94412	0.0623594	0.17832	-3.96318	47	70	35	39
APLP1	-0.726039	1.91351	-3.35752	0.00234951	0.0165011	-1.43687	137	123	76	75
APLP2	-0.0603228	8.99757	-1.76267	0.0892641	0.228636	-5.99182	13352	14723	12670	13343
APMAP	0.00698341	6.28787	0.127642	0.899377	0.950932	-7.04147	2054	2137	1907	2166
APOA1BP	-0.0064242	5.76248	-0.0992032	0.921709	0.962892	-6.91738	1401	1527	1271	1553
APOBEC3B	-0.525266	4.90548	-6.72123	3.22479e-07	1.56778e-05	6.73437	930	1003	616	682
APOBEC3C	-0.222328	6.7492	-4.58759	9.20687e-05	0.00142778	0.853593	2971	3278	2508	2668
APOBEC3D	-0.259269	2.27051	-1.31287	0.200266	0.390822	-5.05153	126	157	130	101
APOBEC3F	-0.604749	1.54586	-2.52801	0.0176225	0.0732132	-3.06676	100	93	57	65
APOBEC3G	-0.538689	2.02034	-2.65439	0.0131515	0.059425	-2.86538	128	134	82	92
APOBR	-0.857218	0.989676	-3.0318	0.00531073	0.030894	-2.16909	67	76	34	42
APOC1	-0.555606	5.69726	-7.75599	2.41471e-08	1.87862e-06	9.20591	1619	1769	965	1275
APOE	-0.430163	7.68693	-9.59927	3.35707e-10	5.9591e-08	13.2673	6176	6694	4202	5052
APOL1	-0.687452	5.79433	-11.0119	1.70611e-11	5.16505e-09	16.346	1859	1925	1115	1156
APOL2	-0.00810393	5.13664	-0.107844	0.914916	0.958988	-6.7467	861	1040	886	938
APOL4	-0.0607205	5.29421	-0.874081	0.389776	0.592038	-6.41113	1037	1118	934	1064
APOL6	-0.273852	1.06573	-0.965177	0.343014	0.548177	-5.10804	51	73	55	44
APOLD1	-0.0138226	0.799099	-0.0466016	0.963173	0.983441	-5.44102	48	45	46	43
APOM	-0.0599941	2.11989	-0.305101	0.762627	0.876627	-5.75667	123	115	105	115
APOO	0.0396623	3.01442	0.266222	0.792089	0.893439	-6.04258	202	225	224	202
APOOL	0.231769	3.43061	1.79016	0.0846397	0.221019	-4.7045	244	292	273	336
APOPT1	0.0215597	3.18567	0.157783	0.875801	0.939779	-6.11959	232	253	222	254
APPBP2	0.18402	5.11956	2.53566	0.017316	0.0722851	-3.80149	839	914	933	992
APPL1	-0.0277471	5.27452	-0.371048	0.713495	0.845844	-6.72134	995	1104	1027	967
APPL2	0.0397472	4.21297	0.376755	0.709298	0.843597	-6.38975	441	547	430	553
APRT	-0.0984629	7.76751	-2.42628	0.0222026	0.0866332	-4.58793	5819	6308	5150	5805
APTX	0.222297	5.1782	3.0956	0.00453641	0.0275268	-2.57579	875	926	992	1039
AQP1	-0.202418	1.42276	-0.789593	0.436639	0.633729	-5.32131	0	0	0	0
AQP1	-0.202418	1.42276	-0.789593	0.436639	0.633729	-5.32131	68	87	51	81
AQP10	-0.551901	5.2768	-7.88937	1.74577e-08	1.44712e-06	9.56017	1212	1312	789	875
AQP11	0.288919	2.03136	1.4411	0.161044	0.340474	-4.83683	94	104	111	123
AQP2	-0.126284	0.828921	-0.43018	0.670476	0.817953	-5.37033	47	52	38	50
AQP3	-0.136289	5.91536	-2.29403	0.029788	0.106799	-4.49115	1623	1778	1475	1516
AQP7	-1.21218	0.254299	-3.35299	0.0023767	0.0166276	-1.77276	38	61	18	22
AQPEP	0.0132558	1.00888	0.0466883	0.963105	0.983441	-5.49122	47	60	58	47
AQR	0.162238	6.60283	3.15811	0.00388324	0.0244365	-2.75221	2288	2660	2574	2772
ARAF	-0.104906	6.37545	-1.97261	0.0588506	0.172018	-5.19898	2245	2385	1949	2215
ARAP1	-0.084449	6.66049	-1.69604	0.10137	0.24849	-5.72503	2670	2934	2394	2717
ARCN1	0.100363	7.71313	2.48035	0.0196471	0.0792266	-4.46798	5200	5700	5454	5838
AREL1	0.0237304	5.73431	0.382088	0.705384	0.840909	-6.84057	1375	1462	1372	1416
ARF1	0.0765098	9.16157	2.32707	0.0276988	0.101509	-4.98275	14353	15644	14559	16019
ARF3	-0.198194	7.54237	-4.24178	0.000232438	0.00290308	-0.191301	5362	5367	4491	4548
ARF4	0.0992426	6.47403	1.8351	0.0775196	0.208232	-5.45863	2314	2304	2265	2516
ARF5	0.0709239	6.11218	1.27362	0.213644	0.407429	-6.19864	1749	1880	1756	1929
ARF6	-0.159197	6.31741	-2.98498	0.00595754	0.0334627	-3.09671	2188	2342	1903	2018
ARFGAP1	0.0376589	7.08359	0.773609	0.445877	0.642461	-6.91375	3573	3626	3310	3841
ARFGAP2	-0.228224	7.61842	-5.41306	1.00293e-05	0.0002503	2.91232	5350	6099	4558	4880
ARFGAP3	0.254411	4.09039	2.39287	0.0239307	0.0912787	-3.8046	415	424	428	542
ARFGEF1	0.0852458	6.31872	1.60412	0.120312	0.280225	-5.79227	1979	2189	2062	2211
ARFGEF2	0.03817	6.66139	0.722563	0.476155	0.670382	-6.86731	2452	2932	2597	2736
ARFIP1	-0.165664	5.03502	-2.04877	0.0503094	0.154319	-4.7296	888	976	839	772
ARFIP2	0.130001	5.95007	2.22888	0.0343314	0.118517	-4.62708	1550	1627	1598	1763
ARFRP1	-0.083523	5.94171	-1.40521	0.171349	0.354142	-5.98788	1611	1794	1440	1668
ARG2	-0.0584096	2.26155	-0.281536	0.780444	0.88728	-5.80633	101	169	106	140
ARGLU1	0.0378307	6.37227	0.705134	0.48676	0.678143	-6.81573	2172	2223	2084	2277
ARHGAP1	-0.136105	6.09866	-2.4099	0.023035	0.0885413	-4.30147	1865	1996	1662	1734
ARHGAP10	0.270974	1.63201	1.17149	0.251627	0.451217	-5.04635	73	78	77	100
ARHGAP11A	-0.222081	7.6469	-5.32762	1.26072e-05	0.000296568	2.68014	5479	6169	4684	4961
ARHGAP11B	-0.280976	5.73509	-4.5541	0.000100731	0.00152146	0.963621	1510	1648	1179	1334
ARHGAP12	-0.0105645	3.77056	-0.0853907	0.93258	0.968537	-6.31468	332	404	383	327
ARHGAP17	0.157819	5.34183	2.23931	0.0335642	0.116631	-4.45615	981	1082	1118	1108
ARHGAP18	0.0248956	5.68282	0.400509	0.69193	0.831745	-6.8198	1307	1432	1273	1421
ARHGAP19	-0.423358	5.64981	-6.39903	7.41238e-07	3.10249e-05	5.82149	1426	1707	1096	1158
ARHGAP21	0.17991	6.01832	3.07422	0.00478305	0.028612	-2.82467	1624	1649	1732	1851
ARHGAP22	0.303123	3.89701	2.42606	0.0222135	0.0866436	-3.68592	296	436	386	479
ARHGAP23	-0.654077	1.0234	-2.11853	0.0434681	0.139833	-3.72003	68	69	27	63
ARHGAP24	-0.134949	2.61215	-0.8049	0.427902	0.626765	-5.64097	177	167	143	159
ARHGAP25	0.117093	0.515293	0.339332	0.736983	0.861081	-5.33072	42	32	27	53
ARHGAP26	0.089653	0.0826276	0.242796	0.809997	0.904645	-5.26494	26	28	34	23
ARHGAP27	-0.0754357	2.14837	-0.388549	0.700654	0.837825	-5.73802	121	123	101	123
ARHGAP28	-0.511659	2.36582	-2.55639	0.0165103	0.0698676	-3.09606	154	178	84	147
ARHGAP30	-0.58635	0.3284	-1.69939	0.10073	0.247531	-4.24865	34	49	22	31
ARHGAP33	-0.459811	4.17668	-4.61773	8.49084e-05	0.00134063	1.43604	558	582	374	427
ARHGAP35	0.221666	6.3961	4.08038	0.000357157	0.00399179	-0.40871	2021	2170	2354	2371
ARHGAP39	0.232695	5.22535	3.17749	0.00369975	0.023591	-2.39556	928	926	1041	1064
ARHGAP42	0.274615	0.800105	0.811893	0.423947	0.62343	-5.16676	62	29	41	58
ARHGAP44	-0.437475	-0.161783	-1.14413	0.262604	0.464149	-4.76203	26	29	18	21
ARHGAP5	0.148226	5.7185	2.40457	0.0233121	0.0893086	-4.2234	1304	1385	1367	1514
ARHGAP5-AS1	0.194569	0.289897	0.5435	0.591241	0.760374	-5.2124	25	36	42	27
ARHGAP6	0.202228	5.42968	2.91555	0.00705602	0.0376772	-3.05169	1015	1145	1208	1195
ARHGAP8	0.561366	-0.0514933	1.49457	0.146612	0.31897	-4.44998	23	19	27	33
ARHGDIA	-0.0926991	7.53045	-2.16354	0.0395068	0.130775	-5.07123	5050	5213	4433	4873
ARHGDIB	-0.166804	4.29826	-1.75915	0.0898707	0.229556	-5.00513	550	570	460	504
ARHGDIG	-0.246847	0.601481	-0.701923	0.488729	0.679652	-5.19395	39	50	22	57
ARHGEF1	0.117604	6.88441	2.48548	0.0194194	0.0785478	-4.31341	2922	3179	3010	3391
ARHGEF10	0.453458	4.96293	5.87337	2.94491e-06	9.42398e-05	4.56573	682	750	935	961
ARHGEF11	-0.0691163	5.56481	-1.05702	0.29986	0.502775	-6.30906	1211	1398	1172	1230
ARHGEF12	0.0644685	7.67147	1.45351	0.157596	0.335733	-6.27188	5012	5717	5400	5434
ARHGEF16	0.0903134	1.77571	0.408975	0.685781	0.82707	-5.62043	79	99	93	90
ARHGEF17	0.821888	0.843148	2.73137	0.0109728	0.0520815	-2.71887	40	32	65	58
ARHGEF18	0.0236833	4.11404	0.226744	0.822329	0.910314	-6.40319	432	490	468	440
ARHGEF19	0.0133711	3.60356	0.112362	0.911366	0.957377	-6.25871	305	345	308	326
ARHGEF2	-0.338806	5.91615	-5.64548	5.39295e-06	0.000149012	3.81246	1743	1911	1290	1505
ARHGEF25	-0.00864461	3.42958	-0.0678642	0.946393	0.975751	-6.20723	276	305	253	306
ARHGEF3	-0.127236	1.78668	-0.562868	0.578165	0.75155	-5.5546	103	91	72	100
ARHGEF39	-0.36808	4.33939	-3.60539	0.00124321	0.0102504	-1.14428	536	708	451	476
ARHGEF40	-0.852833	2.82526	-5.41733	9.91527e-06	0.000248566	3.41302	250	261	133	140
ARHGEF6	-0.466519	2.00117	-2.24491	0.0331585	0.115528	-3.61524	130	122	91	85
ARHGEF7	0.0134703	5.79282	0.214424	0.831826	0.915877	-6.90657	1451	1513	1445	1448
ARHGEF9	0.351379	3.67126	2.98042	0.00602442	0.0337222	-2.45819	298	308	343	405
ARID1A	-0.0875735	7.56942	-2.08873	0.046282	0.146212	-5.2181	5107	5418	4655	4919
ARID1B	0.218108	6.9313	4.67568	7.26651e-05	0.00118376	1.05391	2888	3200	3250	3595
ARID2	0.0538838	5.93413	0.858612	0.398106	0.599949	-6.59181	1481	1750	1623	1616
ARID3A	-0.28946	8.07855	-7.391	5.9348e-08	3.70619e-06	8.00447	7660	8419	5956	6768
ARID3B	-0.258227	5.98512	-4.1772	0.000276098	0.00329191	-0.0729205	1885	1839	1462	1545
ARID4A	0.306275	4.2086	2.91055	0.00714218	0.0380614	-2.74275	389	509	539	531
ARID4B	0.102504	5.47016	1.54395	0.13423	0.299853	-5.67476	1079	1222	1164	1223
ARID5A	0.327593	3.63949	2.53865	0.0171976	0.0719766	-3.39333	304	295	307	424
ARID5B	0.595111	3.63844	4.98597	3.15485e-05	0.000605157	2.42493	273	271	380	414
ARIH1	0.255614	6.17959	4.63454	8.11597e-05	0.00129027	1.0856	1680	1889	1979	2138
ARIH2	0.165794	6.67823	3.24789	0.00310063	0.0205714	-2.55307	2516	2680	2800	2835
ARIH2OS	-0.0638516	0.639041	-0.205066	0.839057	0.919838	-5.38766	46	39	38	40
ARL1	0.06667	5.91669	1.10268	0.279889	0.483269	-6.35022	1459	1721	1539	1676
ARL13B	-0.0998929	4.05022	-0.878273	0.387538	0.590008	-6.02418	391	540	386	448
ARL14EP	0.148737	4.84567	1.87358	0.0718396	0.197384	-4.98331	691	777	770	803
ARL15	0.438437	5.86309	7.0739	1.3139e-07	7.34833e-06	7.50479	1315	1374	1620	1907
ARL16	0.0334963	4.28903	0.335679	0.739705	0.862601	-6.42914	531	507	517	509
ARL17A	0.213072	2.2013	1.12079	0.272237	0.474965	-5.24407	109	120	117	140
ARL17B	-0.390391	0.546814	-1.20943	0.236972	0.434849	-4.80009	40	49	37	29
ARL2	0.193612	4.92457	2.4916	0.0191509	0.0777991	-3.84074	738	789	785	904
ARL2BP	0.158341	5.28295	2.06471	0.0486674	0.151015	-4.7685	870	1123	1016	1125
ARL3	-0.253185	3.66864	-2.16951	0.0390063	0.129704	-4.1167	358	388	283	322
ARL4A	0.190069	7.6501	4.61514	8.55014e-05	0.00134542	0.777938	4801	5315	5412	5738
ARL4D	-0.148492	1.17195	-0.555039	0.583433	0.755061	-5.39792	68	59	54	56
ARL5A	0.277467	6.75231	5.1226	2.18528e-05	0.000461795	2.27453	2404	2872	3087	3084
ARL5B	0.130456	6.03741	2.23644	0.0337739	0.117232	-4.63278	1567	1812	1744	1828
ARL5B-AS1	-0.0771722	0.212896	-0.219876	0.82762	0.913644	-5.29474	26	38	26	32
ARL6	0.0087101	1.62989	0.0367246	0.970975	0.986623	-5.65493	68	99	83	78
ARL6IP1	-0.205252	7.7299	-4.93417	3.62635e-05	0.000678772	1.61709	5764	6502	5023	5252
ARL6IP5	-0.0586112	5.46351	-0.817947	0.420541	0.620384	-6.5047	1097	1333	1027	1227
ARL6IP6	-0.1443	5.14544	-1.88794	0.0698146	0.193557	-5.04269	919	1087	796	959
ARL8A	0.25699	3.28796	1.80081	0.0829039	0.217867	-4.64827	245	236	234	325
ARL8B	-0.102238	7.17142	-2.19394	0.0370175	0.124971	-4.95117	3790	4243	3588	3642
ARMC1	-0.0565949	6.48097	-1.09692	0.282354	0.4852	-6.48757	2327	2574	2143	2413
ARMC10	0.242901	5.25057	3.42817	0.00196211	0.014442	-1.80079	909	971	1062	1089
ARMC2	-0.159524	0.675966	-0.516442	0.609746	0.774544	-5.30244	40	50	42	36
ARMC5	-0.117774	5.10958	-1.5908	0.123285	0.284722	-5.50752	941	993	797	927
ARMC6	0.181795	6.76127	3.65211	0.00110126	0.00930227	-1.57468	2542	2942	2916	3090
ARMC7	-0.123446	4.52588	-1.39462	0.17449	0.358442	-5.60859	624	669	529	619
ARMC8	0.0502362	5.15482	0.697548	0.491418	0.681961	-6.51128	885	998	907	977
ARMC9	0.0172394	2.9323	0.115945	0.908553	0.955884	-6.04466	200	207	191	207
ARMCX3	0.00399993	4.6322	0.0458282	0.963784	0.983704	-6.5972	612	720	646	645
ARMCX5	-0.296667	3.74421	-2.57041	0.0159855	0.0683283	-3.35337	365	434	308	320
ARMCX6	-0.0283906	3.26464	-0.21135	0.8342	0.916679	-6.13478	243	279	226	269
ARNT	-0.163655	5.72113	-2.62974	0.0139307	0.061862	-3.75299	1450	1550	1273	1316
ARNTL	-0.3204	2.64471	-1.86985	0.0723753	0.198405	-4.37158	163	215	128	164
ARNTL2	-0.0206275	3.4551	-0.15414	0.878645	0.94087	-6.20583	270	323	305	263
ARPC1A	-0.0212709	6.38809	-0.376349	0.709596	0.843766	-7.00014	2130	2407	2184	2138
ARPC1B	-0.227038	6.78239	-4.37908	0.000161042	0.00217523	0.297382	2953	3460	2624	2665
ARPC2	-0.00947829	6.99866	-0.196336	0.845816	0.92372	-7.18272	3369	3531	3063	3572
ARPC3	-0.0383538	7.23199	-0.863727	0.395339	0.597578	-6.86696	3868	4328	3742	3968
ARPC4	-0.173844	6.03462	-2.93435	0.00674097	0.0366126	-3.15068	1784	1963	1469	1746
ARPC5	-0.0197247	6.7956	-0.411221	0.684154	0.826001	-7.07494	2842	3176	2748	2988
ARPC5L	0.125626	6.92477	2.67671	0.0124814	0.0573083	-3.91351	2991	3266	3105	3496
ARPP19	0.0544901	7.83539	1.31489	0.199597	0.389845	-6.48196	5611	6457	5878	6220
ARRB1	0.109974	5.69008	1.73514	0.0941077	0.23639	-5.4391	1292	1378	1382	1404
ARRB2	-0.0567015	4.58452	-0.661702	0.513765	0.700667	-6.36158	627	688	590	632
ARRDC1	0.141096	4.73721	1.72728	0.0955319	0.23859	-5.19073	648	717	707	748
ARRDC2	0.00899006	5.32818	0.129077	0.898252	0.950392	-6.79817	995	1161	1011	1084
ARRDC3	0.574488	5.5447	8.85703	1.7795e-09	2.19304e-07	11.7891	998	1058	1413	1547
ARRDC4	0.0667408	5.36105	0.954782	0.348151	0.553212	-6.35645	1013	1146	1092	1094
ARSA	0.143284	3.67002	1.21288	0.23567	0.433776	-5.5692	317	334	315	381
ARSB	0.219465	4.23887	2.28193	0.0305881	0.108944	-4.06343	452	488	509	549
ARSG	-0.0223865	2.21412	-0.117034	0.907698	0.955496	-5.82314	131	120	113	125
ARSK	0.0140212	3.65287	0.113705	0.910313	0.957045	-6.27427	336	335	345	312
ART4	0.128426	1.79645	0.591939	0.558811	0.735656	-5.54258	82	96	89	99
ARV1	-0.0303682	5.81044	-0.466408	0.644661	0.800566	-6.82326	1391	1668	1325	1569
ARVCF	0.469002	6.16773	8.41679	4.95247e-09	5.07119e-07	10.7281	1546	1741	2135	2261
ASAH1	0.0148834	6.14184	0.266197	0.792108	0.893439	-6.97933	1796	1981	1806	1882
ASAH2	0.900637	1.16198	3.24293	0.00313963	0.0207906	-1.74656	49	39	67	92
ASAH2B	0.0857438	3.41978	0.667261	0.510263	0.69796	-5.98665	275	282	290	282
ASAP1	0.252781	5.44908	3.39504	0.00213537	0.0153966	-1.92822	942	1222	1211	1270
ASAP2	0.192571	3.73976	1.64078	0.112432	0.267251	-5.02268	338	334	334	409
ASAP3	-0.207246	3.81765	-1.78946	0.0847539	0.221151	-4.814	424	391	329	351
ASB1	0.0447979	6.39581	0.834504	0.411313	0.612428	-6.7207	2124	2337	2059	2393
ASB13	0.298339	4.93784	3.74064	0.000874348	0.00784042	-0.954638	733	751	887	878
ASB14	-0.246348	-0.185053	-0.609372	0.547367	0.727363	-5.09805	19	33	25	17
ASB16	0.0737382	1.60198	0.31818	0.752794	0.869704	-5.60169	75	83	82	79
ASB16-AS1	-0.137792	3.43976	-1.03414	0.310235	0.513662	-5.68994	308	302	286	252
ASB18	0.790582	0.152605	1.94232	0.0625872	0.178748	-3.93836	14	35	26	54
ASB6	0.229107	5.30664	3.19166	0.00357084	0.0229688	-2.38187	933	1031	1124	1103
ASB7	-0.0131692	4.57486	-0.150187	0.881732	0.942147	-6.56811	593	695	606	627
ASB8	-0.0771354	5.07437	-1.04014	0.30749	0.511069	-6.19197	896	965	794	912
ASCC1	0.000309109	5.42953	0.00457179	0.996386	0.998321	-6.83458	1082	1236	1099	1141
ASCC2	-0.0958255	6.26047	-1.76967	0.0880656	0.22644	-5.51897	2071	2190	1826	2029
ASCC3	0.289374	6.99817	6.24147	1.11787e-06	4.30905e-05	5.19657	2929	3293	3550	3796
ASCL2	0.877943	1.51645	3.46484	0.00178619	0.0134239	-1.25282	43	73	91	111
ASF1A	-0.0566104	6.24789	-0.951923	0.349573	0.554838	-6.58187	2009	2154	1981	1893
ASF1B	-0.228711	6.51042	-4.44208	0.000136036	0.001915	0.514351	2570	2737	2055	2325
ASGR1	0.75675	0.421282	2.01458	0.0539986	0.162031	-3.847	16	45	51	40
ASH1L	0.0691488	6.26666	1.20053	0.240351	0.438738	-6.32246	2045	1997	1957	2139
ASH1L-AS1	0.305906	2.77767	1.93235	0.0638613	0.181412	-4.30353	169	162	187	208
ASH2L	0.0951045	8.24312	2.53671	0.0172744	0.0721665	-4.42601	7485	8288	7756	8527
ASIC1	0.054432	3.78958	0.444649	0.660114	0.810985	-6.22561	398	335	345	385
ASIC3	-0.419432	3.50637	-3.16898	0.00377928	0.0239555	-1.99787	351	353	277	235
ASIC4	-0.429461	5.35939	-5.33709	1.22914e-05	0.000290612	3.10164	1298	1268	795	1055
ASL	-0.0420607	4.60197	-0.492565	0.626298	0.786742	-6.46537	630	695	586	658
ASMTL	-0.300589	3.705	-2.57299	0.0158904	0.068089	-3.33814	381	397	278	333
ASMTL-AS1	-0.135109	1.78651	-0.611864	0.545741	0.726507	-5.52834	102	92	79	91
ASNA1	0.0222399	6.34719	0.41628	0.680493	0.823888	-6.97471	2127	2215	2062	2200
ASNS	-0.0874791	5.6014	-1.29324	0.206873	0.399375	-6.04772	1355	1334	1213	1232
ASNSD1	0.0635956	6.04729	0.952311	0.34938	0.554595	-6.53466	1557	1932	1795	1723
ASNSP5	-0.28657	1.1931	-1.08899	0.285774	0.489293	-5.02802	64	71	48	59
ASPH	-8.91489e-06	5.80875	-0.000143486	0.999887	0.999934	-6.93418	1387	1633	1380	1536
ASPM	-0.329774	7.82604	-8.24658	7.40743e-09	7.2645e-07	10.1322	6527	7155	5104	5415
ASPRV1	-0.172178	0.696111	-0.56259	0.578351	0.75155	-5.28609	41	51	34	45
ASPSCR1	-0.185072	5.53308	-2.811	0.00907831	0.0452162	-3.3111	1272	1384	1044	1216
ASRGL1	0.0300098	4.06332	0.28722	0.776134	0.885198	-6.37114	402	489	429	449
ASS1	-0.529225	2.3859	-2.87199	0.00784055	0.0406035	-2.46891	152	185	119	107
ASS1P12	0.219676	1.29517	0.831013	0.413248	0.613724	-5.26205	62	59	78	60
ASTE1	0.0958787	2.71162	0.595504	0.556461	0.733278	-5.81094	171	169	164	187
ASTN2	0.0208757	1.95691	0.100801	0.920453	0.962334	-5.74645	94	113	92	111
ASUN	0.229311	6.14001	4.06537	0.000371673	0.00411767	-0.395607	1651	1852	1948	2020
ASXL1	-0.110889	7.35972	-2.35991	0.0257552	0.0962606	-4.65755	4224	4977	3825	4405
ASXL2	0.115502	6.63205	2.3316	0.0274231	0.100737	-4.57675	2457	2668	2542	2826
ATAD1	0.0748127	5.83191	1.06309	0.297149	0.500073	-6.37137	1339	1653	1566	1477
ATAD2	-0.0909224	7.25417	-2.02039	0.0533554	0.160607	-5.28975	3999	4476	3777	3910
ATAD2B	0.0538267	5.61406	0.845503	0.405254	0.607221	-6.52199	1221	1364	1265	1328
ATAD3A	0.183544	7.89864	4.57472	9.53061e-05	0.00146494	0.635837	5656	6398	6272	6955
ATAD3B	0.0946773	7.57831	2.24443	0.0331933	0.11562	-4.92338	4829	5116	4823	5450
ATAD5	-0.21029	5.74096	-3.3274	0.00253623	0.0174676	-2.15937	1454	1643	1192	1397
ATAT1	0.191912	3.69269	1.63391	0.113876	0.269379	-5.01926	322	327	360	357
ATE1	0.227715	4.56676	2.57092	0.0159668	0.0682919	-3.57529	586	590	661	670
ATF1	0.0219651	5.45087	0.327606	0.745734	0.866146	-6.78551	1135	1197	1128	1161
ATF2	0.119051	5.44519	1.73392	0.0943276	0.236618	-5.37815	1043	1206	1174	1186
ATF3	0.235826	1.66694	0.984502	0.333601	0.538074	-5.23073	92	67	80	98
ATF4	-0.0383928	7.76502	-0.923501	0.363918	0.568501	-6.90291	5692	6159	5504	5648
ATF5	0.0159435	5.92857	0.268245	0.790547	0.892297	-6.9273	1610	1646	1517	1665
ATF6	0.0870933	6.55005	1.66117	0.108238	0.260287	-5.75632	2300	2590	2489	2530
ATF6B	-0.108085	6.54667	-2.12425	0.0429462	0.138701	-4.95983	2549	2668	2246	2433
ATF7	0.0797842	4.55231	0.914045	0.368776	0.572337	-6.154	571	657	595	659
ATF7IP	-0.0128998	5.18427	-0.159545	0.874426	0.939095	-6.75322	884	1083	977	908
ATF7IP2	0.0245989	5.55147	0.361485	0.720548	0.851523	-6.80054	1134	1374	1154	1308
ATG10	-0.223226	4.1526	-2.20859	0.0358685	0.122188	-4.17763	472	563	403	453
ATG12	0.164839	5.8989	2.75631	0.0103428	0.0497868	-3.52013	1407	1627	1573	1712
ATG13	-0.0203439	6.44193	-0.389014	0.700314	0.837701	-7.00739	2266	2440	2200	2285
ATG14	-0.364602	4.25451	-3.66998	0.00105124	0.00897585	-0.967024	549	617	391	486
ATG16L1	-0.175951	5.35118	-2.57263	0.0159038	0.0681254	-3.783	1094	1240	962	1034
ATG16L2	-0.313615	2.49561	-1.81741	0.0802583	0.212648	-4.41898	160	177	130	132
ATG2A	-0.0392486	6.40624	-0.692342	0.494629	0.684644	-6.83234	2333	2288	2137	2207
ATG2B	0.185412	5.26815	2.66796	0.0127402	0.0580561	-3.55915	931	1012	1013	1123
ATG3	0.0625211	5.53147	0.890745	0.380928	0.58383	-6.46098	1242	1191	1215	1238
ATG4A	0.0727331	4.08202	0.702424	0.488421	0.679344	-6.17193	432	456	409	495
ATG4B	-0.0221749	6.63791	-0.436646	0.665837	0.814713	-7.03063	2534	2865	2523	2613
ATG4C	0.0660344	3.62208	0.545024	0.590207	0.759773	-6.12319	288	361	311	344
ATG4D	-0.0689295	4.92261	-0.895643	0.378352	0.581367	-6.28558	801	869	728	811
ATG5	-0.0485202	5.82789	-0.800303	0.430515	0.629444	-6.61377	1481	1624	1430	1472
ATG7	-0.0311285	4.76839	-0.384315	0.703752	0.840231	-6.5666	719	761	681	719
ATG9A	0.154492	7.29969	3.55909	0.00140139	0.0112743	-1.90442	3876	4153	4167	4471
ATG9B	-0.56286	1.95681	-2.53479	0.0173509	0.0724091	-3.08555	145	111	74	91
ATHL1	-0.292529	5.95476	-4.87495	4.25245e-05	0.000768088	1.76636	1797	1895	1342	1575
ATIC	0.080213	8.02865	2.05555	0.0496056	0.153142	-5.34876	6493	7168	6791	7162
ATL2	-0.0156002	6.64914	-0.316805	0.753826	0.870318	-7.07934	2615	2811	2475	2714
ATL3	0.255989	6.13661	4.45832	0.000130242	0.00185455	0.629801	1597	1870	1944	2053
ATM	0.179007	6.61747	3.38123	0.00221187	0.0157962	-2.2179	2450	2508	2699	2727
ATMIN	0.114026	6.21464	2.0991	0.045285	0.143982	-4.93382	1849	1989	1929	2086
ATN1	-0.322307	7.08371	-6.7124	3.29864e-07	1.58951e-05	6.40713	4070	4083	3034	3268
ATOX1	-0.219449	4.46454	-2.34298	0.026741	0.0988312	-4.00816	580	705	487	579
ATP11A	0.00863112	6.1251	0.151605	0.880624	0.941493	-6.99993	1851	1890	1725	1913
ATP11B	0.0275133	6.82996	0.527781	0.601958	0.768718	-7.02614	2776	3295	2963	3008
ATP11C	0.135972	4.82982	1.64759	0.111017	0.26532	-5.34216	667	793	774	776
ATP13A1	0.00125202	7.36021	0.02794	0.977915	0.989497	-7.26936	4322	4509	3981	4572
ATP13A2	0.272864	5.64848	4.25148	0.000226497	0.00284369	0.18979	1157	1299	1329	1541
ATP13A3	0.134826	7.11776	2.81568	0.00897722	0.0448249	-3.64205	3283	3857	3702	3863
ATP1A1	-0.093773	9.42889	-2.89099	0.00748872	0.0393094	-3.80406	18189	20114	16882	17792
ATP1A1OS	-0.451753	1.05433	-1.62193	0.116427	0.273695	-4.4197	67	63	39	53
ATP1B1	-0.0234014	2.52631	-0.136889	0.892134	0.948031	-5.91598	152	159	149	147
ATP1B2	-1.7071	3.78737	-13.2715	2.35894e-13	2.04238e-10	19.0091	610	731	212	186
ATP1B3	0.0645456	6.78075	1.20285	0.239469	0.43756	-6.43255	2803	2973	2977	2867
ATP2A1	-0.385194	2.07168	-1.8102	0.0813985	0.2149	-4.33547	112	146	110	83
ATP2A2	0.0741926	8.90791	2.10851	0.0443972	0.141969	-5.37271	12274	12890	12472	13135
ATP2A3	-1.0556	4.90491	-13.0993	3.20701e-13	2.23304e-10	19.9043	1115	1208	506	574
ATP2B1	-0.173919	5.84549	-2.87855	0.00771734	0.0402002	-3.23423	1615	1668	1337	1476
ATP2B4	-0.5262	4.49543	-5.54719	7.00826e-06	0.000185899	3.78783	657	804	442	538
ATP2C1	0.104789	5.66935	1.68385	0.103728	0.252196	-5.515	1272	1366	1320	1422
ATP5A1	0.0100816	9.18197	0.303074	0.764154	0.877876	-7.48939	14699	16448	14600	15699
ATP5B	0.0106934	10.4862	0.374965	0.710613	0.844224	-7.62351	36279	40627	36000	38843
ATP5C1	0.0855453	7.59877	2.07649	0.047484	0.148598	-5.24575	4823	5300	4938	5445
ATP5D	-0.0554748	7.24695	-1.18865	0.244918	0.444337	-6.53881	3868	4474	3606	4152
ATP5E	-0.161802	6.80483	-2.43137	0.0219494	0.085975	-4.40899	3056	3313	2328	3226
ATP5F1	0.0108637	8.6887	0.291478	0.772911	0.883345	-7.42577	10290	11846	10484	11044
ATP5G1	-0.0252358	6.51973	-0.478378	0.636228	0.79483	-6.98518	2460	2517	2212	2518
ATP5G2	-0.0330831	7.74244	-0.710045	0.483759	0.675642	-7.07505	5898	5751	5136	5876
ATP5G3	-0.0221585	8.54359	-0.551052	0.586125	0.756942	-7.29333	9632	10604	8795	10507
ATP5H	-0.0261829	6.05319	-0.40035	0.692046	0.831745	-6.91232	1796	1810	1516	1919
ATP5I	-0.620495	4.7379	-4.85881	4.44104e-05	0.000793913	1.96788	869	919	405	761
ATP5J	-0.0564856	6.91819	-1.04531	0.305141	0.508422	-6.63436	3347	3288	2810	3367
ATP5J2	-0.0876535	6.81779	-1.37763	0.179621	0.365009	-6.22079	3153	3107	2468	3260
ATP5L	-0.131781	7.29261	-2.90568	0.007227	0.0383722	-3.46901	4188	4644	3606	4193
ATP5O	0.123286	6.6911	2.25562	0.0323957	0.113609	-4.73909	2499	2825	2853	2754
ATP5S	0.0266527	3.73848	0.234421	0.816425	0.908092	-6.28057	346	364	338	361
ATP5SL	-0.157989	5.93887	-2.70647	0.0116375	0.0544384	-3.63821	1644	1842	1445	1574
ATP6AP1	0.0766549	6.54393	1.51952	0.140244	0.309516	-5.96706	2363	2522	2383	2597
ATP6AP1L	-0.210528	2.38672	-1.17905	0.248656	0.44819	-5.23286	140	162	119	133
ATP6AP2	0.104583	5.8735	1.69311	0.101932	0.249386	-5.5512	1444	1599	1445	1722
ATP6V0A1	0.211839	7.64612	5.01546	2.91439e-05	0.000570876	1.84555	4894	5110	5475	5724
ATP6V0A2	-0.276354	6.42043	-5.24706	1.56462e-05	0.000348623	2.66605	2470	2596	1970	2073
ATP6V0B	0.05311	7.01326	1.11644	0.27406	0.47713	-6.5771	3241	3584	3168	3683
ATP6V0C	0.303512	3.78186	2.20355	0.0362604	0.123282	-4.08445	288	379	455	349
ATP6V0D1	-0.11598	6.33166	-1.96077	0.0602867	0.174725	-5.21012	2161	2343	2066	1957
ATP6V0E1	-0.00047381	5.49557	-0.00668156	0.994718	0.997727	-6.85236	1084	1351	1148	1198
ATP6V0E2	0.11566	4.65182	1.22438	0.231375	0.42836	-5.86199	556	752	672	690
ATP6V0E2-AS1	0.573293	2.68601	3.50275	0.00162045	0.0124883	-1.1254	137	146	185	223
ATP6V1A	-0.0198431	7.14686	-0.377665	0.708629	0.84344	-7.1575	3477	4217	3673	3645
ATP6V1B2	-0.148098	7.62441	-3.61395	0.00121591	0.010079	-1.81881	5320	5853	4678	5066
ATP6V1C1	-0.00422601	6.80469	-0.0811293	0.935937	0.969841	-7.16039	2762	3269	2877	2926
ATP6V1C2	0.531265	1.10257	1.88727	0.0699086	0.193775	-4.06918	43	52	77	58
ATP6V1D	-0.35026	4.71936	-4.07188	0.000365306	0.00406006	-0.0659173	722	881	591	622
ATP6V1E1	-0.186493	7.10203	-4.07387	0.000363382	0.00404513	-0.557575	3712	4173	3259	3434
ATP6V1E2	0.0518388	2.94672	0.339484	0.736869	0.861079	-5.99942	208	198	210	197
ATP6V1F	-0.0892628	6.92921	-1.76812	0.0883298	0.226894	-5.66379	3350	3410	2828	3323
ATP6V1G1	0.0632097	6.56126	1.22383	0.231579	0.428568	-6.36102	2315	2660	2366	2656
ATP6V1H	-0.0141646	5.90847	-0.23443	0.816418	0.908092	-6.93099	1598	1645	1530	1574
ATP7A	0.12999	6.11246	2.17096	0.0388855	0.129443	-4.77567	1620	1944	1856	1907
ATP7B	-0.101124	5.55252	-1.57098	0.127824	0.291448	-5.6562	1237	1377	1136	1219
ATP8A2	-0.0188671	0.498781	-0.0560985	0.955676	0.980098	-5.37287	45	32	29	44
ATP8B1	0.675398	1.74203	2.99506	0.0058123	0.0329434	-2.18497	64	78	97	123
ATP8B2	0.234394	7.53497	5.6265	5.67262e-06	0.000155506	3.49246	4443	4751	4991	5466
ATP8B3	-0.0418465	2.7803	-0.264756	0.793206	0.893849	-5.96923	171	204	161	191
ATP9A	-0.0453187	0.204245	-0.111988	0.91166	0.957377	-5.30724	19	49	39	22
ATP9B	0.0391397	4.16595	0.371538	0.713134	0.845632	-6.37638	498	456	433	512
ATPAF1	0.00181327	5.68851	0.0286361	0.977365	0.989156	-6.90294	1282	1493	1290	1393
ATPAF2	-0.348759	4.05409	-3.39048	0.00216038	0.015503	-1.59778	491	516	366	398
ATPIF1	-0.086614	7.35546	-1.90467	0.0675171	0.188842	-5.51266	4391	4686	3806	4470
ATR	0.0486203	5.5314	0.744711	0.462874	0.657686	-6.58046	1202	1242	1177	1266
ATRAID	-0.0115192	5.43374	-0.172593	0.864258	0.933575	-6.8204	1139	1193	1082	1154
ATRIP	0.127738	4.87079	1.59516	0.122306	0.283116	-5.43334	751	754	743	846
ATRN	0.28147	6.24416	5.14454	2.06022e-05	0.000438694	2.42529	1769	1927	2129	2213
ATRX	0.302394	6.42579	5.43193	9.53548e-06	0.000241438	3.15554	1979	2182	2502	2460
ATXN1	-0.0614676	0.458554	-0.187198	0.852904	0.92731	-5.35108	41	34	31	38
ATXN10	0.00972012	6.5814	0.182501	0.856551	0.929577	-7.09907	2420	2712	2505	2489
ATXN1L	0.1292	5.73699	2.0721	0.0479227	0.149501	-4.87111	1334	1406	1428	1469
ATXN2	0.0792881	6.07773	1.29136	0.207515	0.400146	-6.16854	1803	1732	1699	1908
ATXN2L	0.0803189	8.15854	1.93949	0.0629464	0.179449	-5.57586	7446	7489	7460	7801
ATXN3	0.240128	3.18631	1.72968	0.0950951	0.237818	-4.7315	224	225	259	254
ATXN7	0.0178998	4.46495	0.196812	0.845447	0.923644	-6.52401	590	589	563	590
ATXN7L1	-0.310488	2.61614	-1.82717	0.078738	0.210308	-4.43219	165	203	126	161
ATXN7L2	-0.0150395	4.63032	-0.16984	0.866401	0.934368	-6.58291	640	700	571	714
ATXN7L3	0.0696349	6.73391	1.41413	0.168741	0.350518	-6.15496	2621	2972	2680	2992
ATXN7L3B	0.153899	7.35523	3.56782	0.00137014	0.011042	-1.89193	3946	4406	4317	4661
AUH	0.0555364	3.63996	0.446023	0.659134	0.81023	-6.17747	284	378	305	357
AUNIP	0.0680996	4.29713	0.718016	0.478909	0.671765	-6.23002	499	532	514	531
AUP1	-0.0558821	7.76975	-1.3854	0.177259	0.361898	-6.37984	5790	6172	5383	5740
AURKA	-0.322401	6.99187	-7.00934	1.54694e-07	8.3499e-06	7.17955	3664	3991	2813	3105
AURKAIP1	-0.0198709	7.30788	-0.416918	0.680032	0.823872	-7.17102	4060	4529	3725	4479
AURKB	-0.568525	5.88378	-9.02525	1.21164e-09	1.59182e-07	12.1509	1766	2111	1186	1337
AUTS2	0.078336	2.19636	0.413284	0.68266	0.824949	-5.7436	115	124	114	130
AVEN	-0.0237887	4.39969	-0.255457	0.800305	0.898502	-6.48912	545	600	495	595
AVIL	-0.326541	1.9956	-1.54867	0.133093	0.298443	-4.68864	123	117	77	109
AVL9	-0.0818662	6.9299	-1.72298	0.0963171	0.239906	-5.73694	3152	3600	2977	3184
AVPI1	-0.441049	1.96265	-2.12941	0.0424798	0.137707	-3.80679	116	127	88	85
AXIN1	0.133222	6.5495	2.52901	0.0175822	0.0731173	-4.15433	2357	2453	2360	2745
AXL	-0.548545	3.7448	-4.72079	6.43676e-05	0.00106839	1.74991	429	441	289	286
AZI1	-0.160575	4.90879	-2.00758	0.0547828	0.163491	-4.76801	853	855	683	794
AZI2	-0.0916289	4.92706	-1.1817	0.24762	0.447289	-5.99531	830	858	724	807
AZIN1	0.167031	7.37276	3.81655	0.000716736	0.00671074	-1.26638	3936	4485	4336	4798
B2M	-0.19857	7.86253	-4.8513	4.53166e-05	0.00080804	1.37753	6456	6954	5258	6050
B3GALNT2	0.0415188	4.55481	0.438638	0.66441	0.813535	-6.47568	565	681	647	595
B3GALT4	-0.277017	0.0267386	-0.714181	0.481238	0.67354	-5.0813	33	27	16	34
B3GALT6	-0.0907016	5.21372	-1.18789	0.245212	0.444696	-6.07039	1059	1002	872	996
B3GALTL	0.0158159	3.06549	0.106546	0.915936	0.959589	-6.08794	202	247	190	250
B3GAT3	0.0715207	5.87033	1.16736	0.25326	0.453096	-6.26683	1459	1612	1432	1691
B3GNT1	0.355959	4.4152	3.52423	0.00153326	0.0119956	-1.36113	468	549	542	722
B3GNT2	0.0319186	5.04753	0.422691	0.675865	0.821225	-6.63567	869	888	852	884
B3GNT4	-0.138178	0.777245	-0.465532	0.64528	0.800832	-5.34542	43	53	41	43
B3GNT5	0.0131226	4.02362	0.12582	0.900806	0.951743	-6.39179	423	446	421	427
B3GNTL1	-0.171365	3.73617	-1.48797	0.148335	0.321462	-5.2402	361	398	328	324
B4GALNT1	0.101855	3.12589	0.730938	0.471107	0.665312	-5.85174	217	235	230	239
B4GALNT4	0.0952567	4.87213	1.17558	0.250016	0.449501	-5.98647	709	817	718	859
B4GALT1	-0.393527	5.46671	-5.64643	5.37935e-06	0.000148932	3.89444	1365	1358	994	1009
B4GALT2	0.419807	6.40485	7.89789	1.71011e-08	1.42605e-06	9.46474	1860	2080	2498	2595
B4GALT3	0.166008	6.2788	3.06698	0.00486941	0.029004	-2.89861	1851	2094	2030	2247
B4GALT4	0.0198418	3.34365	0.149954	0.881915	0.942198	-6.17109	242	301	261	270
B4GALT5	-0.0452833	6.64353	-0.880039	0.386597	0.589225	-6.73623	2608	2851	2548	2566
B4GALT6	0.56077	2.21591	2.75836	0.0102924	0.0496129	-2.68138	87	119	162	133
B4GALT7	-0.0260761	4.55468	-0.295536	0.769843	0.881494	-6.52857	634	641	564	646
B9D1	0.0954414	2.5535	0.556847	0.582215	0.754295	-5.78462	145	159	164	151
B9D2	-0.309351	2.53144	-1.75491	0.0906065	0.230885	-4.52272	175	171	115	156
BABAM1	-0.085844	5.38349	-1.18427	0.246616	0.446428	-6.12111	1147	1162	1072	1033
BACE1	0.118562	3.39691	0.913689	0.36896	0.572559	-5.79024	260	282	292	278
BACH1	-0.100536	6.06016	-1.74425	0.0924806	0.233863	-5.51392	1740	1977	1641	1708
BACH1-IT1	0.381097	0.135458	1.03154	0.311433	0.514694	-4.89099	31	21	26	39
BACH2	0.184568	2.93478	1.23446	0.227657	0.424241	-5.32581	178	207	210	213
BAD	-0.141871	2.80765	-0.896237	0.378041	0.581057	-5.62538	175	221	172	174
BAG1	-0.0576315	6.34573	-1.06493	0.296329	0.499054	-6.49123	2071	2397	1976	2170
BAG2	0.312815	6.61964	6.29361	9.75498e-07	3.84838e-05	5.39234	2250	2496	2737	2960
BAG3	0.544106	6.03361	9.27055	6.96432e-10	1.03176e-07	12.6887	1440	1475	2011	2097
BAG4	0.0915712	5.43349	1.34426	0.190041	0.37778	-5.93932	1037	1217	1128	1191
BAG5	0.156352	5.82185	2.56653	0.0161293	0.0687061	-3.91244	1361	1520	1528	1575
BAG6	0.0142713	9.03211	0.411531	0.683929	0.825979	-7.42948	13455	14555	13422	13914
BAGE2	-0.00424359	4.24479	-0.0409396	0.967645	0.98519	-6.47079	507	515	427	562
BAHD1	0.136423	6.30656	2.34953	0.0263554	0.0977575	-4.4705	1837	2234	2115	2200
BAI3	0.568268	-0.016083	1.45095	0.158302	0.336927	-4.49719	14	32	29	33
BAIAP2	0.0425578	5.29264	0.573268	0.571203	0.746488	-6.62966	1066	1011	1007	1057
BAIAP2-AS1	-0.272821	4.18601	-2.63468	0.0137711	0.0613293	-3.33415	516	561	376	489
BAIAP2L1	-0.190648	5.28732	-2.67654	0.0124866	0.057313	-3.54463	1120	1123	896	1003
BAIAP2L2	-0.246048	0.159259	-0.653511	0.518949	0.705475	-5.13611	42	25	21	32
BAIAP3	-0.92184	1.54612	-3.78229	0.000784082	0.00717236	-0.593409	99	116	60	50
BAK1	0.179597	5.15823	2.37184	0.0250804	0.0945249	-4.14707	920	884	960	1012
BAMBI	0.0378557	5.91849	0.609945	0.546993	0.727258	-6.7719	1547	1665	1444	1750
BANF1	0.00463434	7.3734	0.107328	0.915322	0.959125	-7.26618	4193	4716	4130	4505
BANP	0.0595631	4.55343	0.619052	0.541066	0.722909	-6.37923	631	608	544	707
BAP1	0.0808062	6.94044	1.74004	0.0932296	0.235117	-5.71194	3047	3378	3137	3430
BARD1	0.0156641	4.18716	0.143651	0.886842	0.944822	-6.44249	426	555	419	539
BATF2	-0.00165991	1.93847	-0.00742868	0.994127	0.997494	-5.74551	117	91	82	118
BATF3	1.80212	-0.207633	4.50313	0.000115495	0.00168594	-0.145393	13	11	41	42
BAX	-0.0769585	5.92765	-1.1922	0.243545	0.442872	-6.25185	1637	1727	1373	1720
BAZ1A	0.0733022	6.49342	1.31594	0.199248	0.38952	-6.23255	2146	2589	2363	2442
BAZ1B	0.105324	7.95128	2.67488	0.0125353	0.0574416	-4.08783	6246	6583	6370	6974
BAZ2A	0.0199293	7.52988	0.452408	0.654586	0.806491	-7.19372	4860	5003	4754	4912
BAZ2B	-0.351173	4.68248	-3.92028	0.000545564	0.00542293	-0.441522	706	855	605	578
BBC3	-0.0174496	3.22828	-0.125793	0.900827	0.951743	-6.13753	224	284	242	242
BBIP1	-0.288515	2.87434	-1.89992	0.0681629	0.190151	-4.3792	205	230	166	178
BBS1	0.10773	0.371517	0.319809	0.751572	0.869086	-5.30572	27	40	35	34
BBS10	0.151859	4.35453	1.58079	0.12556	0.28797	-5.2963	524	518	562	557
BBS12	0.283399	3.31208	2.12437	0.0429348	0.138701	-4.10651	218	267	264	306
BBS2	0.15433	3.34393	1.13315	0.267104	0.469066	-5.55935	223	297	279	278
BBS4	0.0372929	5.00485	0.473587	0.639598	0.796853	-6.60013	864	841	786	904
BBS5	0.126802	3.31173	0.949744	0.350659	0.555651	-5.73177	231	280	270	269
BBS7	0.124414	3.82378	1.1092	0.277118	0.480891	-5.73112	356	373	350	419
BBS9	0.357767	1.96434	1.72181	0.0965334	0.240315	-4.44414	82	103	115	114
BBX	0.290478	5.1961	3.67844	0.00102833	0.00885813	-1.17066	881	898	1094	1014
BCAM	-0.361715	3.44139	-2.54425	0.0169779	0.0713872	-3.33213	367	300	220	278
BCAN	0.187648	3.33825	1.43032	0.164087	0.344137	-5.20196	256	253	262	298
BCAP29	-0.184639	6.02288	-3.13313	0.00413269	0.0255786	-2.68683	1736	1994	1563	1607
BCAP31	-0.0302437	7.56014	-0.716483	0.47984	0.672258	-7.04136	4994	5257	4720	4983
BCAR1	0.318501	5.645	5.04023	2.72667e-05	0.000544787	2.2627	1134	1277	1375	1531
BCAR3	-0.741906	0.0940538	-2.04229	0.0509914	0.155793	-3.80781	31	43	20	22
BCAS2	-0.0173517	6.18637	-0.292493	0.772144	0.88283	-6.98226	1809	2141	1730	2042
BCAS3	0.135023	3.00194	0.889596	0.381534	0.584269	-5.6901	201	210	186	253
BCAT1	-0.0232825	7.81081	-0.544008	0.590897	0.760156	-7.19147	5644	6546	5688	5888
BCAT2	0.0682924	5.68138	1.08446	0.287742	0.491331	-6.31069	1308	1387	1274	1459
BCCIP	0.0346156	6.76369	0.719786	0.477836	0.671477	-6.8908	2766	3007	2762	2953
BCDIN3D	0.104807	2.37237	0.582273	0.565209	0.74204	-5.71686	126	142	126	153
BCDIN3D-AS1	0.385566	0.170747	1.09944	0.281272	0.484522	-4.84207	26	26	30	36
BCKDHB	0.299363	4.96914	3.90175	0.000572876	0.0056552	-0.556982	725	792	890	915
BCKDK	0.460974	5.42858	6.76987	2.84674e-07	1.4058e-05	6.79717	968	1004	1292	1332
BCL10	-0.183242	3.3011	-1.39477	0.174445	0.358412	-5.23657	270	294	228	252
BCL2	0.519825	2.89403	3.38364	0.00219835	0.0157157	-1.41447	171	162	227	234
BCL2L1	0.0283416	7.42729	0.653069	0.519229	0.705704	-7.06319	4329	4840	4422	4611
BCL2L11	0.513773	6.95708	11.0274	1.65347e-11	5.11693e-09	16.3499	2677	2914	3745	3970
BCL2L12	-0.147525	6.50636	-2.74665	0.0105825	0.0506433	-3.67518	2405	2748	2071	2428
BCL2L13	-0.000266512	7.06912	-0.00577832	0.995432	0.997932	-7.21619	3403	3822	3406	3572
BCL2L2	0.226679	4.69569	2.72897	0.0110353	0.0522537	-3.27454	616	671	713	743
BCL3	-1.2748	0.846806	-4.21199	0.000251654	0.00307191	0.00962415	80	70	28	31
BCL6	-0.515442	1.66944	-2.22856	0.0343547	0.118533	-3.59926	89	116	62	76
BCL6B	0.290662	1.96736	1.38552	0.177224	0.361879	-4.88944	101	89	101	123
BCL7A	0.0736154	5.79076	1.19143	0.243843	0.443181	-6.21922	1341	1565	1415	1538
BCL7B	-0.106511	5.48701	-1.53494	0.136425	0.3032	-5.69179	1237	1262	1133	1112
BCL7C	-0.179072	4.59901	-2.02032	0.0533626	0.160607	-4.65432	633	757	546	640
BCL9	-0.0189012	4.35108	-0.185544	0.854188	0.927953	-6.48889	475	638	495	561
BCL9L	-0.218472	3.83454	-1.92078	0.0653677	0.184535	-4.60243	417	409	346	340
BCLAF1	0.0925941	8.70527	2.57851	0.0156894	0.0675359	-4.40073	10336	11406	10954	11443
BCOR	0.169818	8.05803	4.23774	0.000234954	0.00292401	-0.275639	6649	6856	7143	7542
BCORL1	0.347036	5.07602	4.31427	0.000191525	0.00250675	0.476269	705	912	947	1033
BCR	0.165304	7.5626	3.80898	0.000731106	0.00681485	-1.31578	4727	4871	4880	5533
BCS1L	0.00532742	6.10327	0.0896588	0.92922	0.96675	-7.00243	1863	1827	1699	1879
BDH2	0.0561458	2.99484	0.380706	0.706398	0.841729	-6.00012	202	218	189	234
BDP1	0.116595	6.8135	2.44522	0.0212746	0.0839528	-4.38298	2761	3049	2940	3147
BECN1	-0.130011	5.48734	-1.87839	0.0711569	0.196224	-5.1501	1280	1243	1075	1151
BEGAIN	-0.0405047	1.33016	-0.156512	0.876793	0.94018	-5.5628	57	81	56	73
BEND3	-0.0410806	4.98953	-0.525498	0.603523	0.769906	-6.56901	810	922	820	808
BEND3P3	0.121435	1.00489	0.423407	0.675349	0.820816	-5.41392	44	59	61	48
BEND6	0.0407021	1.52223	0.160298	0.873839	0.938602	-5.61393	58	98	66	86
BEND7	0.577473	4.25844	5.82868	3.31485e-06	0.000103042	4.52936	397	446	551	667
BET1	-0.000627409	4.38155	-0.00683655	0.994595	0.997717	-6.51634	544	576	521	561
BET1L	0.0800956	6.15837	1.32973	0.194723	0.384134	-6.1388	1827	1904	1940	1876
BEX2	0.0653002	3.07151	0.443838	0.660693	0.811403	-5.99877	200	243	196	253
BEX4	-0.199004	7.18129	-4.1893	0.000267339	0.00322056	-0.270429	4067	4297	3230	3826
BFAR	0.0314523	6.31629	0.559084	0.580708	0.753115	-6.89652	2044	2191	2105	2081
BHLHB9	-0.272666	2.58191	-1.53816	0.135636	0.302219	-4.84675	191	163	147	135
BHLHE40	-0.282329	6.65444	-5.11154	2.25117e-05	0.000473562	2.26331	2969	3007	2152	2608
BICD1	0.536498	4.84895	6.36209	8.16019e-07	3.35218e-05	5.8337	573	719	840	968
BICD2	0.295902	6.17953	5.34044	1.21816e-05	0.000288996	2.95712	1714	1803	1972	2203
BID	0.107153	5.23777	1.48819	0.148278	0.321396	-5.69219	936	1020	933	1106
BIN1	-0.26775	3.14501	-1.87551	0.0715644	0.196771	-4.48851	251	269	220	199
BIN3	-0.158104	4.1063	-1.5467	0.133566	0.298946	-5.26879	486	492	393	454
BIRC2	0.0317865	5.588	0.483102	0.632914	0.791697	-6.75796	1172	1391	1215	1314
BIRC5	-0.174777	6.1931	-2.87378	0.00780658	0.0404745	-3.32343	1903	2285	1799	1782
BIRC6	0.174872	7.68184	4.12162	0.000320101	0.0036717	-0.526713	4933	5461	5603	5733
BIVM	0.327139	4.68606	3.86154	0.000636848	0.00614421	-0.592059	605	629	744	753
BLCAP	-0.1828	5.48185	-2.78682	0.00961819	0.0471189	-3.35222	1236	1323	1053	1126
BLM	-0.250201	6.30565	-4.69262	6.94308e-05	0.00113886	1.21538	2204	2436	1810	1960
BLMH	0.0950663	7.45251	2.2514	0.0326945	0.114369	-4.88917	4373	4742	4467	4946
BLOC1S1	-0.427908	2.41768	-2.27524	0.0310385	0.110069	-3.63154	185	150	111	127
BLOC1S2	-0.151572	4.61369	-1.75035	0.091405	0.232028	-5.11555	667	721	552	657
BLOC1S3	-0.0486865	4.53931	-0.537981	0.594993	0.7633	-6.42137	602	671	533	659
BLOC1S4	-0.0622822	5.57568	-0.915627	0.367961	0.571813	-6.44996	1274	1348	1093	1340
BLOC1S5	0.184844	5.10577	2.40439	0.0233211	0.0893086	-4.06756	786	954	946	963
BLOC1S6	0.23051	6.75555	4.26385	0.000219141	0.00276929	-0.000619443	2447	2928	3040	3045
BLVRA	-0.18344	5.72935	-2.69687	0.0119036	0.0553118	-3.60969	1405	1643	1158	1441
BLVRB	-0.266142	7.63043	-6.35024	8.41587e-07	3.42688e-05	5.39097	5520	6175	4416	4985
BLZF1	0.176826	5.08013	2.07584	0.0475485	0.1487	-4.6936	735	988	932	940
BMF	-0.821338	1.73516	-3.54152	0.00146643	0.0116292	-1.06486	103	135	70	60
BMI1	-0.029403	6.40437	-0.516004	0.610048	0.774645	-6.94015	2183	2416	2218	2141
BMP1	0.213563	4.67316	2.42744	0.0221445	0.0864792	-3.90086	577	701	652	780
BMP2K	0.325148	6.0624	5.71379	4.49677e-06	0.000128852	3.96561	1548	1661	1897	1989
BMP8B	0.371164	1.66437	1.54047	0.135073	0.301255	-4.62858	80	69	106	82
BMPR1A	-0.100899	4.6708	-1.19365	0.24299	0.442568	-5.90317	663	755	631	647
BMPR2	0.18201	4.95089	2.28359	0.0304768	0.108714	-4.26538	751	808	870	842
BMS1	-0.0207315	7.44226	-0.455389	0.652467	0.805193	-7.17743	4705	4710	4359	4610
BMS1P1	-0.040269	1.70174	-0.174985	0.862396	0.932794	-5.66183	83	93	92	75
BMS1P17	-0.0681844	-0.101416	-0.164989	0.870181	0.936486	-5.24189	20	31	34	16
BMS1P18	0.225725	2.33472	1.20995	0.236776	0.434718	-5.18631	114	137	122	163
BMS1P20	0.791469	0.404075	2.35831	0.0258467	0.0964989	-3.3514	25	28	49	41
BMS1P4	-0.244115	2.15401	-1.21302	0.235619	0.433776	-5.13315	143	118	105	106
BMS1P5	-0.0355686	2.70926	-0.207423	0.837234	0.918491	-5.96041	169	185	189	149
BMS1P8	-0.0441751	2.07443	-0.221624	0.826273	0.913083	-5.7637	102	128	102	113
BMX	0.326692	1.08816	1.19173	0.243728	0.443044	-4.91043	43	59	61	62
BNIP1	-0.0464257	3.74547	-0.396044	0.695182	0.833791	-6.23168	325	410	335	351
BNIP2	-0.149207	6.04038	-2.58707	0.0153816	0.0666889	-3.91895	1761	1969	1518	1734
BNIP3	0.357471	4.65533	3.89728	0.000579662	0.00570416	-0.494595	518	687	708	777
BNIP3L	0.254333	5.959	4.38165	0.000159941	0.00216667	0.464407	1487	1575	1680	1851
BOD1	-0.112723	4.09801	-1.05307	0.301635	0.504513	-5.87452	499	460	394	461
BOD1L1	-0.0304566	6.227	-0.525017	0.603852	0.770148	-6.89456	2052	2019	1812	2040
BOK	0.199997	4.05814	1.85986	0.0738231	0.201234	-4.77009	384	451	480	449
BOLA1	-0.0692134	3.10932	-0.487136	0.63009	0.789728	-5.99067	215	261	203	235
BOLA2B	-0.696071	0.350336	-2.00514	0.0550583	0.164044	-3.85845	35	53	21	31
BOLA3	0.0232896	5.1563	0.291516	0.772883	0.883345	-6.71495	938	966	819	1059
BOLA3-AS1	0.317177	3.77048	2.70112	0.0117851	0.0549446	-3.08809	341	317	363	428
BOP1	-0.107709	5.2208	-1.41331	0.168979	0.3507	-5.79007	1033	1050	834	1039
BORA	-0.332078	3.86918	-2.76863	0.0100443	0.0486397	-2.96647	440	443	284	399
BPGM	-0.0722487	4.65153	-0.844469	0.405821	0.607595	-6.24574	652	735	585	691
BPHL	-0.113723	3.55126	-0.936858	0.357129	0.561646	-5.81656	307	348	287	298
BPNT1	0.155617	6.01215	2.70414	0.0117016	0.0546649	-3.66069	1577	1710	1731	1808
BPTF	0.00631587	7.66808	0.148852	0.882775	0.942747	-7.30993	5373	5534	5156	5433
BRAF	0.0500717	4.9307	0.640028	0.527544	0.71236	-6.48434	796	814	793	818
BRAP	-0.0854168	5.76595	-1.40462	0.171523	0.354362	-5.94528	1461	1552	1314	1431
BRAT1	-0.00426663	7.18286	-0.0944914	0.925416	0.964105	-7.23297	3687	4145	3551	3997
BRCA1	-0.398881	6.73252	-8.10668	1.03423e-08	9.47548e-07	9.92728	3095	3474	2340	2473
BRCA2	-0.251056	4.90828	-3.15492	0.00391423	0.0246093	-2.36736	849	910	720	710
BRCC3	0.257921	4.57552	2.98431	0.00596729	0.0334627	-2.6744	568	604	636	719
BRD1	0.153124	5.35764	2.23203	0.0340977	0.118003	-4.47433	1009	1082	1046	1203
BRD2	0.051887	8.4285	1.37009	0.181935	0.36807	-6.49559	8928	9260	8861	9364
BRD3	0.240278	5.25405	3.40318	0.00209146	0.0151539	-1.86236	914	974	1005	1152
BRD4	0.135473	7.54923	3.16041	0.003861	0.0243296	-2.91797	4693	4912	4992	5206
BRD7	0.115996	6.66118	2.34594	0.0265664	0.0983488	-4.55409	2540	2687	2600	2877
BRD8	-0.135605	7.06549	-2.856	0.0081485	0.0418262	-3.54139	3741	3804	3230	3408
BRD9	-0.260663	6.60968	-4.92377	3.72917e-05	0.000689673	1.77158	2840	2903	2301	2333
BRE	-0.0769193	4.06372	-0.692548	0.494502	0.684561	-6.17249	406	520	439	409
BRF1	-0.106993	5.05192	-1.43879	0.161691	0.341012	-5.70828	873	979	784	878
BRF2	-0.0248385	4.24123	-0.247632	0.806291	0.902677	-6.43943	456	573	473	502
BRI3	-0.00348854	3.35028	-0.0241021	0.980948	0.990627	-6.18397	265	285	213	325
BRI3BP	0.267258	6.49244	5.03587	2.75883e-05	0.00054885	2.09044	2078	2340	2379	2764
BRICD5	-0.364889	1.64363	-1.58159	0.125376	0.287643	-4.57037	92	98	62	81
BRINP3	0.401569	2.05337	1.88934	0.0696199	0.193171	-4.21201	113	83	122	124
BRIP1	-0.391401	5.04183	-5.19125	1.8174e-05	0.000397942	2.77558	970	1057	739	755
BRIX1	0.0858191	6.43891	1.60244	0.120684	0.28093	-5.8217	2098	2436	2267	2379
BRK1	-0.0908728	7.1763	-1.888	0.069807	0.193557	-5.5095	3845	4187	3321	3984
BRMS1	0.00302388	5.7617	0.0487929	0.961443	0.982755	-6.92104	1442	1471	1355	1466
BRMS1L	0.19082	2.92016	1.16056	0.255971	0.456422	-5.40366	193	186	237	186
BROX	-0.165221	5.93732	-2.67017	0.0126745	0.0578516	-3.71678	1586	1912	1460	1549
BRPF1	0.0117545	6.43148	0.22582	0.82304	0.91063	-7.05652	2224	2399	2121	2386
BRPF3	-0.00117973	6.94864	-0.0254865	0.979854	0.990164	-7.19248	3205	3439	3084	3333
BRSK1	-0.381163	2.41063	-2.00983	0.0545288	0.16299	-4.09096	133	197	122	120
BRSK2	0.926553	0.874923	2.9132	0.00709636	0.0378636	-2.39754	29	43	48	88
BRWD1	0.113169	6.51803	2.15751	0.0400184	0.131873	-4.89139	2278	2458	2458	2494
BRWD3	0.126656	5.586	1.95166	0.0614133	0.176739	-5.04941	1183	1290	1208	1404
BSCL2	-0.279144	1.28924	-1.08695	0.286658	0.490302	-5.05021	70	74	50	65
BSDC1	-0.0475717	6.48124	-0.926491	0.362391	0.566722	-6.65871	2341	2544	2156	2414
BSG	-0.127307	9.9014	-4.09377	0.000344686	0.00388131	-0.885791	26315	27416	22701	24870
BSN	0.170245	4.99966	2.21697	0.0352264	0.120507	-4.40756	748	875	863	901
BST2	-0.06043	6.25853	-1.02678	0.313629	0.51689	-6.51079	1898	2321	1840	2062
BTAF1	-0.190858	6.7439	-3.67896	0.00102694	0.00885522	-1.50306	3095	3061	2504	2707
BTBD1	0.158289	6.99793	3.33313	0.00249967	0.0172842	-2.4082	3157	3350	3262	3765
BTBD10	0.113354	3.93825	1.04841	0.303737	0.506507	-5.82982	372	421	378	452
BTBD2	0.165499	5.49642	2.51198	0.018281	0.075231	-3.9477	1091	1202	1161	1326
BTBD3	0.184182	5.31464	2.6457	0.0134215	0.0602541	-3.61888	931	1079	1050	1156
BTBD7	0.157339	5.02675	2.03302	0.0519802	0.158047	-4.75668	828	830	888	899
BTBD9	-0.0745224	4.65899	-0.87403	0.389803	0.592038	-6.22288	686	708	591	689
BTD	-0.192039	3.47669	-1.42807	0.164727	0.345064	-5.24425	348	294	264	275
BTF3	-0.0365673	9.26465	-1.11755	0.273595	0.476617	-6.9163	15941	17574	14968	16620
BTF3L4	-0.193333	5.87019	-3.23537	0.00319988	0.0211012	-2.40995	1576	1790	1358	1486
BTF3L4P2	0.241855	1.69299	1.07736	0.290842	0.494296	-5.15313	77	82	84	98
BTG1	0.283652	6.31178	5.32275	1.27727e-05	0.000299448	2.88609	1833	2040	2187	2369
BTG2	-0.381786	5.58939	-5.77431	3.82903e-06	0.000114427	4.20838	1405	1553	1002	1195
BTG3	0.149404	3.95417	1.37561	0.180238	0.365941	-5.45655	361	432	389	461
BTK	-0.0989091	6.06002	-1.70274	0.100093	0.246444	-5.5801	1816	1897	1556	1798
BTN2A1	0.081145	5.38617	1.15738	0.257245	0.457814	-6.15286	995	1197	1058	1180
BTN2A2	0.105017	3.85823	0.917941	0.36677	0.571132	-5.92934	335	420	355	429
BTN2A3P	0.247033	2.31475	1.35211	0.187546	0.374823	-5.01762	113	132	134	147
BTN3A1	0.0295093	2.53645	0.173999	0.863163	0.933045	-5.91367	149	159	141	163
BTN3A2	0.141407	3.32841	1.07755	0.290761	0.494267	-5.61309	254	259	271	276
BTN3A3	-0.221975	-0.10862	-0.531257	0.59958	0.766877	-5.14399	22	32	13	36
BTNL9	0.268898	4.3615	2.80016	0.00931669	0.0459496	-3.02714	454	556	543	632
BTRC	-0.265412	5.38197	-3.85924	0.000640703	0.00615765	-0.758016	1206	1250	972	1003
BUB1	-0.211162	7.64434	-4.87395	4.26384e-05	0.000768153	1.46855	5712	5856	4735	4924
BUB1B	-0.372914	6.81222	-7.81434	2.09467e-08	1.68615e-06	9.20967	3305	3571	2474	2658
BUB3	-0.16978	7.555	-3.98273	0.000462621	0.0048482	-0.867829	5030	5708	4351	4873
BUD13	-0.103028	4.85494	-1.28053	0.211241	0.404815	-5.85603	786	827	665	788
BUD31	-0.0869894	5.16026	-1.18063	0.248038	0.447548	-6.06375	908	1077	869	935
BVES	0.532071	1.77408	2.38441	0.0243875	0.0925794	-3.34166	67	86	95	119
BX322557.10	0.50907	3.67786	4.23827	0.000234624	0.00292252	0.543239	273	304	354	442
BYSL	0.0364243	6.84425	0.762475	0.45238	0.647932	-6.87536	2957	3144	2852	3199
BZRAP1	0.498639	3.65635	4.15573	0.000292339	0.00342398	0.340422	293	277	374	403
BZRAP1-AS1	-0.58235	0.54421	-1.82888	0.0784745	0.209838	-4.10111	44	51	31	30
BZW1	0.0311834	8.39132	0.802104	0.42949	0.628264	-7.09943	8299	9589	8590	9052
BZW1P2	0.201032	2.1884	1.0414	0.306919	0.510591	-5.31838	114	114	112	142
BZW2	0.124274	7.26708	2.57574	0.0157898	0.0677831	-4.19372	3757	4176	4220	4138
C10orf118	0.126495	3.82198	1.08901	0.285766	0.489293	-5.75185	343	383	403	366
C10orf12	0.224203	3.79349	2.00488	0.0550871	0.16406	-4.44731	337	352	369	409
C10orf128	-0.090104	6.97078	-1.94434	0.0623316	0.178291	-5.37293	3380	3577	3036	3282
C10orf2	0.151362	6.19013	2.77129	0.00998082	0.0484465	-3.55279	1792	1933	1918	2081
C10orf25	-0.170626	0.600389	-0.528304	0.6016	0.768684	-5.28116	51	36	36	37
C10orf32	-0.15277	3.43365	-1.21506	0.234853	0.432842	-5.49475	291	321	252	280
C10orf35	0.262554	2.86749	1.69491	0.101587	0.248782	-4.6985	186	172	196	218
C10orf71	0.364293	2.76458	2.16078	0.0397399	0.131173	-3.9094	179	145	179	221
C10orf88	-0.0413128	3.86019	-0.378322	0.708147	0.843093	-6.27516	381	410	362	381
C11orf1	0.042911	3.974	0.398746	0.693213	0.832789	-6.30385	375	459	403	426
C11orf21	0.126623	0.520565	0.395904	0.695284	0.833791	-5.31484	38	35	35	42
C11orf24	0.132788	5.43538	1.91963	0.0655186	0.184923	-5.06643	1118	1103	1147	1205
C11orf30	0.314683	4.73502	3.72392	0.000913379	0.00809658	-0.947604	634	648	773	769
C11orf31	-0.0781894	5.75485	-1.1828	0.247188	0.447058	-6.21978	1436	1550	1222	1520
C11orf35	-0.332855	2.04498	-1.65986	0.108503	0.260744	-4.54848	123	125	92	98
C11orf48	-0.006712	5.50335	-0.100698	0.920533	0.962341	-6.84925	1138	1308	1157	1195
C11orf49	-0.0615858	4.16068	-0.597861	0.55491	0.732344	-6.26447	478	505	403	510
C11orf54	0.412077	4.75878	4.9906	3.1158e-05	0.000601812	2.30115	587	675	798	825
C11orf57	0.0428504	6.14241	0.775614	0.444712	0.641435	-6.70985	1786	1957	1778	1949
C11orf58	0.012194	8.00964	0.306474	0.761592	0.876161	-7.32468	6453	7363	6492	6962
C11orf63	0.489039	0.640214	1.51527	0.141314	0.311088	-4.49512	42	29	51	44
C11orf65	0.106511	0.556118	0.314316	0.755695	0.871681	-5.34615	27	52	32	48
C11orf68	0.0384711	4.95114	0.502862	0.619135	0.781126	-6.56964	798	842	790	838
C11orf73	0.21657	5.03006	2.85787	0.00811204	0.0417165	-3.08076	769	862	848	985
C11orf74	0.180601	2.74703	1.11598	0.274255	0.47729	-5.40088	178	161	175	195
C11orf80	0.187688	3.15105	1.32109	0.197549	0.387366	-5.28614	223	223	254	238
C11orf82	-0.12912	4.63075	-1.50217	0.144649	0.31618	-5.49446	661	733	565	668
C11orf83	-0.100678	4.16688	-1.01074	0.321107	0.525777	-5.93891	484	516	415	487
C11orf84	0.225996	5.48253	3.2266	0.00327125	0.0214581	-2.34145	1137	1087	1188	1323
C11orf95	-0.448123	4.90797	-5.38559	1.07943e-05	0.000261884	3.30797	867	1024	599	742
C11orf96	0.418321	1.61934	1.79942	0.0831285	0.218259	-4.26655	65	77	95	89
C12orf10	-0.0623847	2.22346	-0.328507	0.74506	0.865714	-5.78112	129	127	107	130
C12orf23	0.168347	4.49092	1.78163	0.0860509	0.222989	-5.02848	502	643	612	628
C12orf29	0.216443	5.15942	3.00923	0.00561369	0.0320598	-2.7708	840	943	966	1036
C12orf4	-0.280243	4.61307	-3.28038	0.00285673	0.0192516	-1.99509	707	742	555	598
C12orf43	-0.135519	5.0563	-1.82656	0.0788314	0.210308	-5.12153	898	976	806	843
C12orf44	0.0950508	4.13569	0.880941	0.386117	0.588816	-6.04952	396	525	434	513
C12orf45	-0.0809638	3.66485	-0.690504	0.495766	0.685468	-6.0475	339	362	295	346
C12orf49	0.00180671	5.0814	0.0244663	0.98066	0.990547	-6.73629	866	954	823	939
C12orf5	0.149354	1.9318	0.721076	0.477054	0.671057	-5.50346	91	103	99	109
C12orf57	-0.157381	3.565	-1.30186	0.203953	0.395303	-5.43128	312	360	278	304
C12orf60	-0.372985	1.3738	-1.47374	0.152105	0.32739	-4.65483	68	91	53	65
C12orf65	0.0681793	4.82089	0.858931	0.397933	0.599949	-6.28722	711	773	712	792
C12orf66	-0.291514	3.73208	-2.46921	0.0201502	0.0807515	-3.55585	399	390	316	307
C12orf73	0.238042	4.29725	2.50342	0.0186416	0.076309	-3.63904	452	522	526	584
C12orf75	0.538899	2.2431	2.80008	0.00931853	0.0459496	-2.60104	111	100	133	163
C12orf76	-0.0765032	3.63664	-0.623308	0.538307	0.72123	-6.08207	339	348	275	357
C12orf79	-1.01578	0.265396	-2.93413	0.00674449	0.0366175	-2.46223	43	48	20	23
C14orf1	-0.220091	4.3724	-2.37318	0.0250057	0.0943199	-3.92209	561	641	484	513
C14orf119	-0.0494627	4.85705	-0.563108	0.578004	0.75155	-6.5083	838	750	723	754
C14orf142	0.0375311	4.16771	0.346025	0.732004	0.857349	-6.38617	408	554	438	511
C14orf159	-0.193877	4.42002	-2.00959	0.0545557	0.163008	-4.61977	601	627	543	498
C14orf166	0.0109683	6.14014	0.19201	0.84917	0.925334	-6.99638	1744	2040	1774	1907
C14orf2	-0.168094	6.16722	-2.84496	0.00836792	0.0426387	-3.3827	2000	2098	1598	1935
C14orf28	0.331954	0.923338	1.16423	0.254505	0.454622	-4.90616	44	46	49	61
C14orf79	0.192242	3.06338	1.33223	0.193911	0.383145	-5.2471	215	205	220	243
C14orf80	-0.314217	4.18946	-3.13957	0.00406694	0.0253066	-2.21734	538	556	388	463
C14orf93	-0.224585	3.45796	-1.69488	0.101593	0.248782	-4.85916	289	352	228	304
C15orf26	0.00225441	4.08588	0.0212027	0.98324	0.991786	-6.41973	443	470	388	499
C15orf27	-0.0592719	0.822332	-0.202869	0.840757	0.920904	-5.42984	47	49	44	45
C15orf37	-0.521247	0.222744	-1.46674	0.153986	0.330367	-4.50231	42	33	21	29
C15orf39	0.124438	5.97563	1.96802	0.0594042	0.173064	-5.11613	1609	1628	1731	1682
C15orf40	0.169892	4.63289	2.00851	0.0546776	0.163329	-4.68658	597	660	666	701
C15orf41	0.0275768	3.4597	0.220171	0.827393	0.913631	-6.1951	291	294	277	299
C15orf57	0.279044	4.12015	2.65793	0.0130432	0.0590888	-3.26874	441	408	486	507
C15orf61	-0.216591	3.2112	-1.43724	0.162127	0.341621	-5.15472	245	294	180	274
C15orf62	-0.0523457	1.24414	-0.189849	0.850846	0.925984	-5.53524	71	59	46	77
C15orf65	-0.0211285	-0.0649406	-0.0555823	0.956083	0.9802	-5.258	22	29	28	21
C16orf11	-0.106329	-0.0527868	-0.274992	0.785414	0.889818	-5.23242	32	22	19	29
C16orf13	0.0842103	5.52824	1.24291	0.224578	0.420699	-6.09083	1114	1301	1138	1337
C16orf45	-0.482533	0.705692	-1.58612	0.124346	0.286377	-4.41953	47	56	32	39
C16orf46	0.41863	0.720427	1.33378	0.193409	0.382699	-4.70407	29	49	43	56
C16orf52	0.0109743	3.50641	0.0867514	0.931509	0.968146	-6.23031	289	318	308	285
C16orf58	0.0417038	5.34857	0.609576	0.547234	0.727318	-6.62325	1033	1127	1005	1145
C16orf59	-0.197283	5.24212	-2.80008	0.00931854	0.0459496	-3.26287	1023	1157	884	953
C16orf62	-0.00732739	5.37275	-0.106958	0.915612	0.959357	-6.81308	1069	1163	1063	1084
C16orf70	-0.0201371	4.7611	-0.245157	0.808187	0.903638	-6.60882	677	793	669	731
C16orf72	-0.0433535	5.92253	-0.73721	0.467347	0.662016	-6.68605	1600	1711	1459	1648
C16orf80	0.150286	5.29885	2.17491	0.038559	0.128709	-4.56804	977	1031	1041	1113
C16orf87	0.310119	3.92892	2.85334	0.008201	0.0419879	-2.79893	364	370	439	441
C16orf91	0.0852094	4.93018	1.08442	0.287756	0.491331	-6.10411	752	841	749	886
C16orf93	-0.241253	1.53683	-1.02055	0.316519	0.520222	-5.16653	78	91	64	74
C16orf95	0.0828502	2.04103	0.414419	0.681839	0.8243	-5.69632	106	108	106	113
C17orf103	0.191791	2.98946	1.27062	0.214692	0.40861	-5.29971	211	189	203	237
C17orf104	-0.177714	0.308774	-0.519254	0.60781	0.772648	-5.22602	31	39	33	27
C17orf51	0.280991	2.93434	1.77979	0.0863583	0.223578	-4.58655	185	186	238	201
C17orf53	-0.430986	4.12158	-4.07924	0.000358247	0.00400005	0.0773105	500	586	404	376
C17orf58	0.329074	5.01993	4.36178	0.000168675	0.00224755	0.610975	727	830	916	974
C17orf59	-0.102735	2.87626	-0.674728	0.50558	0.694008	-5.81225	189	220	171	197
C17orf62	-0.155912	5.84778	-2.47209	0.020019	0.0803413	-4.11539	1602	1668	1290	1552
C17orf67	0.163797	1.32863	0.6308	0.53347	0.717233	-5.39757	72	56	63	74
C17orf70	0.186201	6.79318	3.86581	0.000629727	0.00608998	-1.03864	2654	2940	2904	3249
C17orf72	-0.142732	1.81788	-0.626358	0.536335	0.719696	-5.52896	109	90	95	79
C17orf75	-0.200784	4.28737	-2.1194	0.0433882	0.139673	-4.38253	541	584	450	496
C17orf80	0.261627	5.45625	3.87161	0.0006202	0.00602715	-0.744538	1059	1097	1161	1339
C17orf85	-0.00321262	5.50418	-0.0483231	0.961814	0.983062	-6.85348	1178	1263	1170	1185
C17orf89	-0.0942459	5.45849	-1.2058	0.238347	0.436741	-6.11601	1105	1349	966	1262
C17orf96	0.209506	4.62329	2.38964	0.0241043	0.0918092	-3.96276	577	657	625	756
C17orf99	-1.09471	1.00994	-3.80484	0.000739084	0.00685709	-0.700101	80	77	39	32
C18orf21	-0.0924079	4.43124	-0.93711	0.357001	0.561573	-6.09352	547	655	474	619
C18orf25	-0.100591	4.49673	-1.1071	0.278008	0.481749	-5.94463	599	656	575	558
C18orf54	-0.100017	3.23925	-0.711771	0.482706	0.67478	-5.89988	240	287	205	272
C18orf56	-0.330087	2.8022	-2.00401	0.0551864	0.164215	-4.18855	199	222	133	194
C18orf8	0.115405	4.79832	1.36946	0.182127	0.368274	-5.72692	726	710	753	750
C19orf10	0.0810461	6.52698	1.57085	0.127853	0.291452	-5.88838	2336	2486	2303	2631
C19orf12	0.119338	4.45374	1.25828	0.219052	0.413799	-5.75889	505	628	596	592
C19orf24	-0.00279639	5.56912	-0.0392279	0.968997	0.985851	-6.87128	1158	1407	1113	1362
C19orf25	-0.0674195	6.00393	-1.175	0.250243	0.449546	-6.29031	1668	1866	1560	1699
C19orf26	0.506546	3.74737	4.43709	0.000137868	0.00193417	1.03318	297	308	394	437
C19orf40	-0.363156	3.33751	-2.61784	0.0143218	0.0631751	-3.15858	294	320	253	212
C19orf43	-0.15342	7.20707	-2.75724	0.01032	0.0497059	-3.78788	4193	4191	3226	4092
C19orf44	0.247934	3.72373	2.15848	0.0399355	0.131714	-4.15294	323	328	357	390
C19orf47	0.0608639	5.22918	0.850095	0.402741	0.604306	-6.41398	974	999	975	1014
C19orf48	-0.00111778	7.59957	-0.0271484	0.978541	0.989914	-7.30999	4961	5477	4815	5265
C19orf52	0.0455249	5.13066	0.604478	0.550567	0.729376	-6.56542	873	980	935	915
C19orf53	-0.229146	6.24755	-4.03361	0.000404331	0.0043649	-0.498795	2128	2298	1666	1990
C19orf54	-0.148999	5.23731	-2.12251	0.0431043	0.138952	-4.64941	1021	1114	903	958
C19orf55	-0.103859	4.67198	-1.24384	0.224238	0.420288	-5.84446	692	728	612	665
C19orf57	0.11025	3.28755	0.774515	0.44535	0.642062	-5.87011	219	290	229	302
C19orf60	-0.229723	5.25406	-3.27741	0.00287828	0.0193704	-2.16435	1049	1174	870	962
C19orf66	-0.101744	1.43808	-0.418923	0.678584	0.823024	-5.52368	71	79	65	70
C19orf68	-0.0535649	1.1348	-0.183041	0.856132	0.929267	-5.50863	76	47	60	51
C19orf70	0.124915	5.28996	1.58573	0.124434	0.286377	-5.5653	944	1075	925	1213
C19orf71	0.300023	2.48031	1.69816	0.100965	0.24789	-4.5963	137	133	142	180
C19orf73	-0.211201	0.200384	-0.593144	0.558016	0.734771	-5.17303	26	41	24	31
C19orf81	-0.372204	2.53965	-2.05212	0.0499602	0.153784	-4.04734	179	177	107	162
C19orf82	0.228089	0.509247	0.694954	0.493016	0.683431	-5.18039	33	37	31	50
C19orf84	0.220129	0.913776	0.766179	0.45021	0.646487	-5.22051	42	51	55	50
C1D	0.0116641	5.06759	0.14518	0.885646	0.944456	-6.72179	791	1014	840	912
C1GALT1	0.131185	6.51517	2.46185	0.0204895	0.0815653	-4.28711	2160	2550	2358	2622
C1GALT1C1	-0.0358923	2.93182	-0.240861	0.811481	0.905213	-6.02257	192	223	189	202
C1orf109	0.00741116	6.37195	0.132528	0.895549	0.949219	-7.06021	2090	2352	2170	2146
C1orf112	-0.197158	5.53386	-3.02392	0.00541471	0.0313536	-2.82831	1249	1420	1084	1165
C1orf115	0.0972779	3.29574	0.695759	0.49252	0.683015	-5.92898	273	238	266	260
C1orf116	-0.162722	2.13579	-0.768214	0.449021	0.645373	-5.52917	125	123	129	90
C1orf122	0.117841	5.39761	1.40195	0.172311	0.355603	-5.85379	1049	1131	959	1349
C1orf123	-0.114084	5.20799	-1.59966	0.121301	0.281775	-5.52177	1010	1056	899	946
C1orf131	-0.134628	5.08966	-1.73074	0.0949023	0.237663	-5.28649	930	990	754	941
C1orf134	0.402987	1.83061	1.85169	0.0750254	0.203427	-4.22675	73	93	107	105
C1orf159	-0.0855335	5.44288	-1.27281	0.213926	0.407654	-6.03137	1159	1251	1018	1179
C1orf172	0.895051	0.494583	2.72116	0.0112409	0.0530467	-2.77178	24	31	42	58
C1orf174	0.102646	5.37346	1.43355	0.163168	0.342951	-5.80462	1066	1086	1013	1224
C1orf192	0.175226	3.27436	1.31157	0.2007	0.391067	-5.33404	241	248	246	288
C1orf198	0.580283	4.54466	6.56876	4.7748e-07	2.15889e-05	6.37796	476	551	703	781
C1orf213	0.0993556	2.46953	0.552097	0.585419	0.756617	-5.76199	151	136	155	142
C1orf216	0.250035	5.71161	3.94476	0.000511439	0.00519771	-0.614766	1198	1390	1392	1582
C1orf220	-0.745883	-0.199601	-1.91225	0.0664983	0.186742	-3.97452	26	34	17	17
C1orf233	0.38248	3.88201	3.41174	0.00204624	0.0149193	-1.51123	315	381	399	478
C1orf27	0.228293	5.86043	3.39881	0.00211492	0.015292	-2.01378	1336	1551	1686	1586
C1orf35	-0.0278404	5.64572	-0.440427	0.663131	0.812631	-6.79296	1320	1398	1210	1368
C1orf43	0.0705831	7.49501	1.63134	0.114419	0.27027	-5.98322	4411	5067	4645	4965
C1orf50	-0.0099963	3.19126	-0.0683684	0.945996	0.975682	-6.13129	206	292	220	254
C1orf52	0.0952471	4.67085	1.13124	0.267891	0.469946	-5.97427	619	706	671	697
C1orf53	0.323018	0.297891	0.872641	0.390546	0.592909	-5.03165	35	24	46	27
C1orf56	-0.0578589	0.551949	-0.180841	0.857842	0.930325	-5.37233	34	46	39	35
C1orf61	-0.358956	1.32403	-1.38265	0.178093	0.362962	-4.75227	72	80	46	70
C1orf63	0.135406	5.84244	2.08628	0.0465211	0.146721	-4.87075	1424	1522	1401	1736
C1orf74	-0.240675	2.53309	-1.33813	0.192005	0.380676	-5.09099	175	162	151	126
C1orf85	0.171608	4.94372	2.09012	0.0461471	0.145956	-4.62971	803	758	785	912
C1orf86	-0.0280146	5.67474	-0.422612	0.675922	0.821225	-6.80833	1410	1364	1251	1376
C1QBP	0.00660128	8.41079	0.174433	0.862825	0.932859	-7.415	8636	9639	8299	9454
C1QTNF6	0.440696	1.21981	1.53741	0.13582	0.302533	-4.55075	50	56	90	55
C1RL	-0.285928	3.5657	-2.36201	0.0256352	0.0959454	-3.72541	328	375	263	294
C1RL-AS1	-0.338353	3.36944	-2.5681	0.0160707	0.0685242	-3.26769	307	316	245	232
C20orf112	0.144926	4.51194	1.54745	0.133386	0.298688	-5.39361	576	588	645	602
C20orf194	0.127795	3.32248	0.979582	0.335981	0.540686	-5.70749	245	269	255	288
C20orf196	-0.0401	3.09762	-0.285504	0.777435	0.88568	-6.06348	221	245	209	229
C20orf24	-0.0257769	4.83	-0.292204	0.772362	0.882966	-6.6175	676	877	671	799
C20orf27	-0.0360366	6.52863	-0.68641	0.498302	0.686948	-6.86392	2420	2609	2187	2560
C20orf96	-0.178433	4.83187	-2.14599	0.0410109	0.134214	-4.49337	761	871	626	770
C21orf119	0.0349227	3.03007	0.226515	0.822505	0.910364	-6.05713	188	249	185	248
C21orf2	0.154729	3.91499	1.38158	0.178417	0.363411	-5.43689	378	391	365	465
C21orf33	0.0402201	7.10956	0.874528	0.389537	0.591999	-6.835	3482	3846	3398	3890
C21orf58	-0.286401	5.25206	-4.06823	0.000368869	0.00408986	-0.195839	1094	1169	841	953
C21orf59	0.150331	3.9811	1.42107	0.166732	0.348026	-5.40511	380	425	429	435
C21orf67	-0.0865427	2.68555	-0.514381	0.611167	0.775358	-5.84585	152	207	148	177
C21orf90	-0.0800696	4.34773	-0.852254	0.401563	0.603318	-6.14148	560	565	488	540
C21orf91	0.0503853	4.3259	0.539902	0.593686	0.762419	-6.35121	508	551	507	553
C22orf23	0.63378	1.35863	2.46854	0.020181	0.0807822	-3.16415	53	57	69	98
C22orf29	0.227529	7.90432	5.58123	6.40004e-06	0.000172727	3.32184	5807	6093	6603	6864
C22orf34	0.115814	3.73886	0.967873	0.34169	0.546877	-5.84644	345	345	316	409
C22orf39	0.287538	6.56344	5.50233	7.90007e-06	0.000205254	3.31786	2263	2337	2673	2754
C22orf46	0.109389	4.71285	1.33248	0.193828	0.383089	-5.74844	648	709	681	734
C2CD2	0.243191	4.88411	2.91416	0.00707991	0.0377903	-2.91594	683	779	744	933
C2CD2L	0.0567333	5.41349	0.848149	0.403804	0.605545	-6.46642	1094	1152	1085	1173
C2CD3	-0.0762491	5.386	-1.0452	0.305191	0.508444	-6.27363	1171	1136	1060	1054
C2CD4C	-0.241687	0.830956	-0.777981	0.443338	0.639785	-5.19495	39	67	47	38
C2CD5	-0.144829	5.1803	-1.98876	0.0569406	0.16807	-4.87705	960	1090	888	904
C2orf16	-0.0282065	0.429684	-0.0831137	0.934374	0.969171	-5.35646	33	39	42	28
C2orf27A	-0.23147	1.87939	-1.08088	0.289301	0.493001	-5.19627	102	111	93	83
C2orf42	-0.319933	2.68925	-1.95516	0.0609785	0.175961	-4.24376	191	196	134	166
C2orf43	0.377585	5.62656	5.98397	2.19861e-06	7.41353e-05	4.74869	1116	1214	1413	1513
C2orf44	0.164732	5.6738	2.54928	0.0167827	0.0708016	-3.91327	1188	1409	1368	1442
C2orf47	0.0194766	4.7733	0.239107	0.812827	0.906424	-6.61424	700	759	708	722
C2orf48	-0.48685	2.709	-3.01592	0.00552221	0.0318436	-2.2051	202	213	141	145
C2orf49	0.252418	5.21874	3.54946	0.00143667	0.0114653	-1.49617	899	935	998	1114
C2orf68	-0.307856	5.26742	-4.41961	0.000144481	0.00199607	0.709556	1107	1197	856	943
C2orf69	0.0295208	4.88682	0.376347	0.709598	0.843766	-6.60647	767	806	761	791
C2orf76	-0.487781	1.82321	-2.20299	0.0363041	0.12337	-3.66175	120	105	77	77
C2orf82	0.357119	0.826087	1.17556	0.250024	0.449501	-4.87796	39	44	61	44
C2orf88	0.0603272	6.7602	1.17325	0.250932	0.450493	-6.46268	2609	3114	2741	3017
C3	-0.382949	2.21139	-1.73858	0.0934906	0.235519	-4.47209	125	158	136	82
C3AR1	-0.991447	0.178392	-2.73349	0.0109178	0.0518734	-2.79834	46	39	23	18
C3orf17	0.0938649	5.54434	1.42713	0.164996	0.345524	-5.8586	1152	1276	1243	1262
C3orf18	-0.185197	1.61923	-0.797144	0.432315	0.630411	-5.36576	77	99	74	75
C3orf33	0.122826	2.8814	0.801546	0.429807	0.62853	-5.72457	173	207	182	218
C3orf38	0.0224135	4.19514	0.22953	0.820186	0.909894	-6.42892	461	516	459	500
C3orf52	-0.154916	3.1092	-1.07672	0.291125	0.494393	-5.54712	223	266	219	206
C3orf58	0.301149	3.25815	2.15219	0.0404742	0.132901	-4.04247	216	246	293	260
C3orf62	0.197496	3.6605	1.64456	0.111644	0.265952	-4.99397	281	356	338	366
C3orf67	-0.463168	1.98815	-2.22515	0.0346093	0.119132	-3.64751	122	128	75	101
C3orf70	0.331405	1.53894	1.37383	0.180784	0.36657	-4.8062	74	65	74	95
C3orf72	0.0451166	3.17244	0.322253	0.749741	0.867944	-6.07649	232	245	211	266
C3orf83	-0.634247	0.758636	-2.09972	0.0452257	0.143859	-3.7358	50	63	31	39
C4orf21	-0.149326	5.17391	-2.04312	0.0509038	0.155701	-4.77796	941	1106	860	922
C4orf27	-0.086394	4.57513	-0.968672	0.341299	0.546561	-6.11019	595	729	579	624
C4orf29	0.100944	4.88011	1.27223	0.214129	0.407873	-5.87451	748	781	733	853
C4orf3	0.0565754	5.68346	0.90536	0.373276	0.576813	-6.4876	1272	1439	1316	1408
C4orf32	0.182324	5.29875	2.42185	0.022425	0.0872322	-4.08278	881	1114	1071	1110
C4orf33	0.0791728	3.99171	0.7006	0.489541	0.680435	-6.14424	361	475	432	419
C4orf36	0.59895	2.14949	2.89996	0.00732782	0.0386982	-2.3904	83	112	118	169
C4orf46	-0.0524361	5.13675	-0.719852	0.477796	0.671477	-6.48984	909	1017	881	914
C4orf48	-0.248564	4.27127	-2.18401	0.0378142	0.127023	-4.25729	576	559	376	557
C5orf15	-0.00484524	6.16786	-0.0875556	0.930875	0.967849	-7.01794	1865	2006	1819	1910
C5orf22	0.209452	5.50126	3.05462	0.00502027	0.0295862	-2.7502	1049	1217	1269	1263
C5orf24	0.155688	6.11451	2.69999	0.0118165	0.0550541	-3.69288	1640	1893	1869	1932
C5orf28	-0.123704	3.87738	-1.13515	0.266281	0.468218	-5.71913	389	435	359	372
C5orf30	0.13386	4.47718	1.38948	0.176029	0.360367	-5.60076	496	654	589	625
C5orf34	-0.169817	3.82069	-1.45836	0.156267	0.333615	-5.30581	352	458	329	364
C5orf45	0.177786	5.40844	2.46144	0.0205086	0.0816006	-4.03003	1105	1043	1137	1207
C5orf51	0.224652	6.4114	4.18331	0.000271645	0.00325369	-0.144572	2015	2218	2372	2409
C5orf54	0.19413	1.79386	0.858796	0.398006	0.599949	-5.36673	82	92	78	117
C5orf55	0.00615083	2.41963	0.0330417	0.973884	0.987937	-5.892	159	129	140	137
C5orf56	-0.443265	0.91924	-1.46147	0.155417	0.332435	-4.59352	48	72	32	54
C5orf66	0.0294197	2.34434	0.156661	0.876676	0.940135	-5.85779	148	123	127	138
C6orf1	-0.195597	3.60066	-1.61957	0.116938	0.274478	-5.01292	317	382	281	308
C6orf106	0.126525	7.66107	3.08055	0.00470868	0.0282568	-3.12417	5048	5368	5212	5784
C6orf120	-0.192543	6.33496	-3.58175	0.00132167	0.0107384	-1.66451	2168	2477	1884	2042
C6orf132	-0.310233	0.669812	-0.986302	0.332733	0.537546	-5.01345	42	53	29	46
C6orf136	-0.07899	5.21992	-1.08327	0.288257	0.491885	-6.18824	946	1116	928	957
C6orf141	0.23119	1.17432	0.87047	0.39171	0.594157	-5.20558	57	54	64	62
C6orf163	0.276157	1.44488	1.10391	0.279365	0.482924	-5.06934	60	72	86	70
C6orf164	0.393174	0.490092	1.22098	0.232639	0.429901	-4.7814	31	34	37	46
C6orf183	-0.115283	1.46019	-0.470083	0.642067	0.798491	-5.50918	70	83	73	64
C6orf203	-0.194851	4.1	-1.85334	0.0747808	0.203	-4.79234	490	497	371	464
C6orf211	-0.172229	5.92203	-2.75236	0.0104402	0.050202	-3.53353	1569	1901	1447	1523
C6orf3	-0.131545	0.753778	-0.43204	0.66914	0.817192	-5.35277	50	44	45	38
C6orf47	0.0627621	4.37056	0.667337	0.510216	0.69796	-6.28881	495	595	531	568
C6orf48	-0.0199682	7.29172	-0.441803	0.662147	0.811963	-7.15716	4011	4481	3758	4343
C6ORF50	0.266952	0.044496	0.720693	0.477287	0.67118	-5.08138	19	32	28	30
C6orf52	-0.151356	1.40449	-0.572474	0.571733	0.746985	-5.4472	66	83	80	53
C6orf57	-0.100181	1.73633	-0.445156	0.659752	0.810847	-5.59478	80	106	76	91
C6orf62	0.0700938	7.78258	1.62014	0.116814	0.274233	-6.0459	5333	6244	5743	5983
C6orf89	-0.211802	7.61995	-5.16826	1.93312e-05	0.000417375	2.25813	5474	5910	4545	4957
C7orf13	0.638957	3.43726	4.7245	6.37286e-05	0.00105938	1.7771	203	265	365	339
C7orf25	-0.459723	0.273137	-1.29044	0.207828	0.400362	-4.68542	39	36	33	21
C7orf26	0.0322858	5.9881	0.562253	0.578578	0.75155	-6.81724	1606	1770	1588	1749
C7orf31	-0.117803	2.97431	-0.78287	0.44051	0.637276	-5.76655	198	242	201	191
C7orf34	0.195096	0.384848	0.582235	0.565235	0.74204	-5.21368	35	30	31	41
C7orf43	-0.299075	4.77871	-3.59497	0.00127722	0.0104442	-1.27591	780	855	651	635
C7orf49	-0.175258	5.6711	-2.65635	0.0130915	0.0592428	-3.6836	1354	1563	1137	1362
C7orf50	-0.217459	6.17109	-3.88483	0.000598979	0.0058495	-0.865133	1968	2214	1627	1850
C7orf55	0.0130857	0.633882	0.0424468	0.966455	0.984496	-5.40338	40	42	40	40
C7orf55-LUC7L2	0.0443736	6.0758	0.772966	0.446251	0.64259	-6.69619	1765	1805	1714	1844
C7orf60	0.255108	2.62591	1.39631	0.173985	0.357731	-5.04495	117	194	169	182
C7orf63	0.465681	1.18038	1.62758	0.115217	0.271702	-4.43124	38	69	57	83
C7orf73	-0.00660191	5.77882	-0.104835	0.917281	0.959886	-6.92097	1388	1571	1422	1425
C8orf33	0.192093	7.47707	4.56702	9.7297e-05	0.0014857	0.675968	4265	4701	4772	5126
C8orf37	-0.558314	2.30897	-2.92325	0.00692533	0.037294	-2.35535	140	184	110	102
C8orf4	-0.0666043	3.08065	-0.440748	0.662901	0.812423	-6.00264	236	230	180	253
C8orf44	0.19026	3.26477	1.37633	0.180018	0.365549	-5.25042	216	268	275	259
C8orf58	0.179328	1.22429	0.602254	0.552025	0.730542	-5.38713	48	70	87	48
C8orf59	-0.274554	3.67791	-2.35465	0.0260576	0.0970091	-3.7685	357	399	297	307
C8orf76	0.232087	1.55348	0.931601	0.359791	0.564303	-5.24688	63	82	96	71
C8orf82	0.0569775	5.64219	0.883556	0.384728	0.587496	-6.49637	1223	1414	1237	1414
C8orf88	-0.363819	2.61829	-2.08414	0.0467302	0.147098	-4.01021	163	212	151	131
C9orf114	0.0557369	6.40779	1.07054	0.293843	0.496609	-6.49956	2122	2358	2153	2347
C9orf116	-0.120681	1.66142	-0.485907	0.63095	0.790305	-5.55639	101	78	61	99
C9orf117	0.385571	2.59491	2.21261	0.0355595	0.121284	-3.7807	143	141	152	209
C9orf142	-0.104046	5.46307	-1.57926	0.12591	0.288534	-5.62055	1167	1292	1067	1144
C9orf147	0.507485	0.388385	1.47857	0.150816	0.32527	-4.50736	34	25	33	48
C9orf156	0.0424838	4.15527	0.416416	0.680394	0.823888	-6.35514	433	511	474	466
C9orf16	0.0031895	6.33564	0.056294	0.955522	0.980098	-7.05929	2149	2190	1929	2280
C9orf163	0.520463	1.08028	1.78762	0.0850569	0.221568	-4.20577	60	37	65	65
C9orf169	-0.255849	0.962671	-0.877705	0.38784	0.590151	-5.15381	49	65	53	40
C9orf172	0.398558	2.93854	2.65425	0.0131559	0.0594255	-3.00162	162	197	223	234
C9orf173	-0.0617782	0.744688	-0.173106	0.863858	0.93336	-5.41657	36	58	25	70
C9orf3	-0.0676782	2.80066	-0.435247	0.66684	0.815241	-5.91752	178	205	170	183
C9orf37	-0.0855413	4.87542	-1.08406	0.287916	0.491482	-6.08764	784	842	687	795
C9orf40	0.0185087	4.85213	0.233758	0.816934	0.908314	-6.6402	734	808	743	767
C9orf41	0.0350476	4.90926	0.388776	0.700488	0.83777	-6.60845	688	918	807	777
C9orf43	0.121485	-0.105313	0.300106	0.766393	0.879295	-5.21743	26	21	34	18
C9orf64	0.0527653	5.0082	0.656053	0.517337	0.704027	-6.49704	798	904	758	953
C9orf66	-0.653319	0.516749	-1.94825	0.0618393	0.177488	-3.94054	45	51	21	40
C9orf69	-0.270101	6.19754	-4.88178	4.175e-05	0.000758031	1.73735	2117	2216	1643	1831
C9orf72	0.00328931	3.748	0.0288387	0.977205	0.989066	-6.31071	333	389	331	368
C9orf78	0.127841	7.79977	3.13472	0.00411628	0.0254952	-3.01695	5386	6089	5730	6386
C9orf85	-0.104758	3.23499	-0.765385	0.450675	0.646663	-5.8601	249	276	210	263
C9orf89	0.32321	2.98467	2.08842	0.0463121	0.146212	-4.0884	209	173	220	238
C9orf9	-0.0748612	1.65965	-0.325053	0.747644	0.8672	-5.61545	92	82	73	86
C9orf91	0.119554	4.89463	1.52986	0.137674	0.305489	-5.53575	745	788	789	821
C9orf96	-0.0522298	0.565855	-0.145561	0.885348	0.944272	-5.38005	60	27	36	38
CA11	-0.496907	2.69272	-2.78926	0.00956242	0.0469391	-2.67995	234	182	141	140
CA13	-0.208363	2.62651	-1.25453	0.22039	0.415367	-5.21487	161	196	143	155
CA2	0.510362	1.58522	2.13868	0.0416532	0.135814	-3.73908	56	80	85	101
CA5B	0.13462	1.83934	0.622784	0.538647	0.721338	-5.5376	88	95	85	110
CA5BP1	0.247116	4.75154	2.89397	0.00743478	0.0391148	-2.92574	647	680	779	746
CA8	0.0908967	5.66049	1.42465	0.165704	0.346434	-5.89189	1255	1382	1255	1462
CAAP1	0.160208	4.25119	1.65174	0.110161	0.263615	-5.15881	472	495	519	526
CAB39	0.10684	8.00187	2.37943	0.02466	0.0932938	-4.71805	6178	7119	6973	6853
CAB39L	0.165583	3.19527	1.11925	0.272881	0.47585	-5.52943	234	229	277	229
CABIN1	-0.0710384	6.76689	-1.41433	0.168684	0.350518	-6.16129	2982	3017	2674	2845
CABLES1	0.400805	2.13831	2.06241	0.0489009	0.151433	-3.95043	97	108	130	132
CABLES2	-0.149034	2.77268	-0.910313	0.370705	0.574434	-5.60293	187	198	183	155
CACFD1	-0.246436	3.72244	-2.04728	0.0504651	0.154558	-4.35182	406	368	299	329
CACNA1H	-0.174025	2.44021	-0.967629	0.34181	0.547006	-5.456	162	148	119	146
CACNA2D2	-0.193725	0.763193	-0.647448	0.522805	0.708158	-5.25783	44	53	36	46
CACNB1	0.193387	1.66528	0.734327	0.469073	0.663381	-5.42132	108	59	77	98
CACNB2	-0.320606	1.95323	-1.51567	0.141214	0.310916	-4.72248	104	128	96	84
CACNB3	-0.062273	1.31922	-0.246297	0.807314	0.903323	-5.54381	65	71	64	62
CACTIN	0.00342399	5.71508	0.0542723	0.957117	0.980421	-6.90877	1394	1427	1281	1453
CACTIN-AS1	0.251756	0.544413	0.750768	0.45928	0.654382	-5.15481	41	31	31	53
CACUL1	0.0890106	5.21428	1.25944	0.218642	0.413304	-5.98606	913	1023	953	1037
CACYBP	0.161935	8.09631	4.10984	0.000330286	0.00376089	-0.615356	6658	7261	7024	8042
CACYBPP2	0.55925	-0.14617	1.46712	0.153885	0.330201	-4.47069	19	20	28	28
CAD	0.108068	8.33856	2.8669	0.00793738	0.0410304	-3.7146	8098	8665	8536	8925
CADM4	-0.0232962	2.48585	-0.134871	0.893714	0.948802	-5.90389	140	163	141	147
CAHM	0.38482	0.726532	1.24482	0.223884	0.419738	-4.7949	45	33	46	51
CALB1	1.37794	1.83434	6.18792	1.2861e-06	4.78882e-05	4.58453	58	60	139	159
CALCOCO1	0.197611	4.73216	2.41295	0.0228778	0.0882657	-3.9473	646	688	698	781
CALCOCO2	0.224957	5.57557	3.48707	0.00168712	0.0128668	-1.73312	1109	1265	1273	1408
CALHM2	0.327459	2.39834	1.78013	0.0863012	0.223513	-4.45452	106	149	144	163
CALM1	-0.0161023	6.82133	-0.335432	0.739889	0.862667	-7.10928	2886	3232	2836	3009
CALM2	-0.073245	8.58271	-1.95434	0.0610802	0.176108	-5.60891	9870	11303	9461	9967
CALM2P2	0.117039	0.756241	0.386821	0.701918	0.83876	-5.36914	42	44	50	41
CALM3	-0.0164398	8.34503	-0.426558	0.67308	0.819704	-7.32768	8368	9229	7819	9013
CALML4	0.475559	3.9256	4.3948	0.000154407	0.00209782	0.90396	325	368	432	500
CALR	0.0374975	9.40459	1.17955	0.248457	0.448015	-6.86404	17213	18770	17065	18632
CALU	0.0737627	7.01685	1.55356	0.131922	0.296936	-6.0142	3143	3656	3322	3586
CAMK1	-0.365587	1.00504	-1.22573	0.230874	0.427718	-4.86067	46	79	51	41
CAMK1D	-0.113584	2.89346	-0.750941	0.459177	0.654303	-5.76527	200	215	170	201
CAMK2D	0.00286766	4.30798	0.0290525	0.977036	0.989066	-6.49183	549	515	504	524
CAMK2G	0.142012	6.00289	2.37455	0.0249296	0.0941478	-4.35164	1628	1652	1727	1771
CAMK2N1	0.0358584	2.82281	0.212137	0.833592	0.916186	-5.99487	173	201	213	163
CAMKK1	-0.279105	2.6702	-1.56499	0.129221	0.293132	-4.8327	153	230	132	170
CAMKK2	0.158727	6.1186	2.77326	0.00993413	0.048304	-3.53264	1634	1908	1822	1996
CAMKMT	-0.0452258	2.96587	-0.298486	0.767615	0.880234	-6.01805	191	237	178	223
CAMKV	0.412163	2.54912	2.30444	0.0291149	0.105258	-3.60472	111	165	172	179
CAMLG	0.174039	4.8359	2.11527	0.0437682	0.140571	-4.55269	688	759	712	869
CAMSAP1	0.0589924	6.53576	1.16044	0.25602	0.45645	-6.42943	2315	2576	2329	2596
CAMSAP2	0.154412	4.02965	1.48591	0.148877	0.322265	-5.33189	388	444	439	456
CAMSAP3	0.88006	2.13463	4.24342	0.00023142	0.00289329	0.533376	98	77	137	172
CAMTA1	0.0745748	4.28763	0.728609	0.472508	0.666749	-6.21933	449	578	528	515
CAMTA2	-0.0195594	5.80675	-0.301677	0.765208	0.878724	-6.88697	1535	1494	1424	1462
CAND1	0.0859171	7.668	2.02198	0.0531802	0.160335	-5.3564	4992	5630	5358	5530
CAND2	0.0302154	4.93223	0.378555	0.707976	0.843093	-6.61941	820	805	747	856
CANT1	-0.0701032	6.35244	-1.31955	0.198056	0.387978	-6.19605	2120	2384	2006	2139
CANX	0.194785	10.0652	6.12865	1.50239e-06	5.37848e-05	4.51831	25050	28882	28886	30691
CAP1	-0.0211225	7.20925	-0.47815	0.636389	0.79483	-7.12501	3879	4135	3678	3956
CAPG	-0.670907	2.31077	-3.56186	0.0013914	0.0112004	-0.981673	161	174	108	96
CAPN1	-0.279926	7.55859	-6.49765	5.73878e-07	2.48193e-05	5.78485	5474	5690	4348	4540
CAPN10	0.165917	5.30761	2.38663	0.0242668	0.0922577	-4.15649	942	1069	1065	1115
CAPN10-AS1	0.250055	3.07795	1.69253	0.102044	0.249521	-4.7583	219	197	242	235
CAPN12	0.661233	-0.115527	1.56509	0.129197	0.293125	-4.37164	31	12	31	28
CAPN15	0.180729	7.64483	4.38058	0.000160397	0.00216863	0.157765	4913	5194	5260	5818
CAPN2	0.208744	5.02359	2.74509	0.0106218	0.0507788	-3.32834	792	835	840	979
CAPN7	0.21124	6.41264	3.94658	0.000508995	0.00519771	-0.757145	1992	2268	2341	2423
CAPNS1	-0.101635	7.67146	-2.34323	0.0267264	0.0988033	-4.74204	5249	6130	4830	5410
CAPRIN1	0.0593374	9.17203	1.7833	0.0857735	0.222626	-5.98121	14363	16045	14762	15846
CAPRIN2	0.110287	3.27629	0.765747	0.450463	0.646498	-5.87316	259	241	283	241
CAPS	-0.155642	2.11205	-0.710377	0.483556	0.675494	-5.56192	96	153	121	94
CAPZA1	-0.0121527	8.32592	-0.321928	0.749984	0.868	-7.36522	8133	9214	7919	8698
CAPZA2	0.118254	6.57825	2.22073	0.0349414	0.119877	-4.78327	2273	2666	2552	2623
CAPZB	-0.0332737	7.11619	-0.736426	0.467816	0.662343	-6.94811	3570	3980	3452	3676
CARD10	0.77688	3.08529	5.42187	9.79555e-06	0.000247125	3.47628	164	184	272	305
CARD11	-0.173004	6.6914	-3.25822	0.00302104	0.0201297	-2.53024	2885	3018	2301	2771
CARD14	-0.0694432	0.445062	-0.213062	0.832878	0.916186	-5.344	38	36	34	34
CARD6	-0.0513639	3.87815	-0.436616	0.665858	0.814713	-6.25712	390	412	405	348
CARD8	0.190221	4.9553	2.38877	0.024151	0.0919166	-4.05838	796	766	820	900
CARD9	-0.19039	4.74274	-2.29492	0.0297294	0.10674	-4.18333	735	801	651	651
CARF	-0.0690485	2.54601	-0.405231	0.688498	0.829093	-5.85177	159	162	134	162
CARHSP1	-0.175074	6.04259	-2.99971	0.00574639	0.0325964	-3.00245	1752	2020	1513	1715
CARKD	-0.196546	5.09655	-2.64188	0.0135418	0.0605901	-3.56978	951	1019	766	897
CARM1	0.321651	6.94686	6.91513	1.96487e-07	1.02482e-05	6.94544	2850	3085	3394	3778
CARNS1	0.246526	0.372612	0.717099	0.479465	0.672004	-5.14183	37	27	30	43
CARS	-0.238301	5.80104	-3.90865	0.00056256	0.00557595	-0.725551	1586	1670	1253	1416
CARS2	-0.055053	5.20797	-0.750488	0.459446	0.654552	-6.48752	1013	1013	876	1009
CASC10	1.39102	1.15132	4.81055	5.05646e-05	0.000872568	1.33317	29	45	104	84
CASC3	-0.0878608	7.20182	-1.98056	0.0579032	0.170154	-5.352	3962	4197	3573	3848
CASC4	0.0484683	5.78888	0.755584	0.456434	0.65162	-6.63904	1348	1578	1462	1461
CASC5	-0.274868	6.94526	-5.81333	3.45257e-06	0.000105209	4.07866	3424	3870	2831	2992
CASC7	0.193186	7.25858	4.40814	0.000148986	0.00204411	0.29063	3644	4061	4080	4432
CASC9	-0.395741	2.33043	-2.12829	0.0425801	0.137932	-3.87439	161	149	104	123
CASD1	-0.0609327	3.90535	-0.554402	0.583863	0.755377	-6.2075	381	443	347	417
CASK	-0.186711	1.48524	-0.747449	0.461247	0.656255	-5.36553	70	90	77	60
CASKIN1	0.932143	3.47683	7.13943	1.11378e-07	6.43587e-06	7.62776	214	219	357	444
CASKIN2	0.725106	4.12228	7.06966	1.32804e-07	7.36825e-06	7.59468	332	397	562	602
CASP10	0.0848974	4.83285	1.03812	0.308414	0.511977	-6.12315	750	737	745	778
CASP2	0.00373569	6.22015	0.0606737	0.952066	0.978254	-7.03227	1955	2043	1999	1882
CASP3	-0.00467385	5.92172	-0.0768441	0.939314	0.972339	-6.95947	1496	1776	1499	1649
CASP6	-0.163676	4.65953	-1.8858	0.0701132	0.19423	-4.9064	650	792	591	651
CASP7	0.0240594	3.56627	0.197025	0.845282	0.923609	-6.23372	306	324	314	306
CASP8	-0.135562	5.2355	-1.84403	0.0761681	0.205845	-5.14154	967	1162	873	998
CASP8AP2	0.293192	5.97241	5.01543	2.91464e-05	0.000570876	2.13398	1423	1630	1727	1887
CASP9	-0.168342	4.54441	-1.84001	0.0767743	0.20688	-4.94832	596	739	533	613
CASS4	-0.21279	4.57613	-2.34189	0.0268056	0.0989386	-4.04269	697	682	581	569
CAST	-0.0694315	5.99804	-1.16107	0.255768	0.456236	-6.30483	1613	1915	1551	1694
CASZ1	0.786795	0.794179	2.58109	0.015596	0.067243	-2.97716	41	30	57	60
CAT	0.17186	7.32697	3.90328	0.000570571	0.00565133	-1.03676	3805	4339	4227	4635
CATSPER2	-0.0954129	3.05536	-0.669449	0.508888	0.697037	-5.87102	222	239	202	215
CAV1	0.445316	0.381925	1.27748	0.212299	0.406222	-4.71235	22	39	44	35
CAV2	-0.205496	4.4655	-2.18895	0.0374162	0.125951	-4.30545	568	712	516	554
CBFA2T2	0.233905	5.04257	3.09317	0.00456379	0.0275968	-2.54729	775	858	923	934
CBFA2T3	0.282806	7.05143	6.17789	1.32035e-06	4.86145e-05	5.02186	3090	3379	3585	4025
CBFB	-0.0466096	7.28758	-0.961385	0.344882	0.550126	-6.78781	4021	4529	3629	4388
CBL	-0.0108829	6.80032	-0.224035	0.824415	0.911754	-7.13699	2942	3073	2725	3048
CBLB	0.341003	0.731091	1.08517	0.287433	0.490959	-4.94305	39	39	58	40
CBLL1	-0.0164352	5.58195	-0.235614	0.815509	0.907757	-6.84697	1294	1293	1259	1215
CBR4	-0.0354238	5.63728	-0.536553	0.595966	0.763975	-6.74295	1347	1363	1176	1382
CBS	0.0810982	8.47218	2.17819	0.0382886	0.128021	-5.18126	9009	9558	8912	10090
CBWD1	0.258942	3.71572	2.24621	0.0330654	0.115261	-3.98738	299	347	352	395
CBWD2	0.19514	5.15567	2.61513	0.0144124	0.0634749	-3.6433	836	958	907	1080
CBWD3	-0.1174	2.49229	-0.488774	0.628945	0.788945	-5.79985	100	241	156	128
CBWD5	0.394328	3.56104	2.94741	0.00653001	0.0357316	-2.5068	305	252	314	389
CBWD6	0.202694	2.88003	1.22348	0.231708	0.428635	-5.32229	173	194	233	181
CBX1	0.182285	6.27121	3.11975	0.00427246	0.0262338	-2.77317	1819	2087	1943	2347
CBX2	0.0107635	5.90739	0.180628	0.858007	0.930362	-6.94225	1535	1682	1456	1679
CBX3	0.0087648	8.78998	0.212262	0.833495	0.916186	-7.46038	10822	12986	10730	12394
CBX3P2	-0.528741	0.727781	-1.71444	0.0978967	0.242657	-4.26358	56	50	39	32
CBX3P9	-0.586945	0.428102	-1.73194	0.0946855	0.237199	-4.216	43	45	21	37
CBX4	-0.0806825	5.24049	-1.11291	0.275548	0.479001	-6.162	954	1141	911	1001
CBX5	-0.3192	8.06334	-7.96104	1.46792e-08	1.29381e-06	9.41587	7537	8550	5835	6628
CBX6	-0.0369042	6.01694	-0.640163	0.527457	0.71236	-6.77662	1726	1799	1607	1714
CBX7	0.361715	3.1146	2.49298	0.0190907	0.0776224	-3.36198	178	235	237	274
CBX8	0.00571913	3.58666	0.0466874	0.963106	0.983441	-6.25851	294	352	284	343
CBY1	-0.00981433	2.27824	-0.0520563	0.958867	0.98113	-5.84804	118	144	110	142
CC2D1A	0.0880333	5.17978	1.15612	0.257752	0.458517	-6.09759	966	924	955	984
CC2D1B	-0.041542	5.64863	-0.62453	0.537517	0.720604	-6.69414	1340	1393	1300	1269
CC2D2A	0.000728255	3.05611	0.00504353	0.996013	0.998091	-6.09052	225	221	214	217
CCAR1	-0.155766	8.08416	-4.07673	0.000360639	0.00401942	-0.69972	7416	7986	6424	6940
CCAR2	-0.0499736	7.38456	-1.15828	0.256882	0.457402	-6.5983	4361	4782	4162	4372
CCBL1	-0.248937	3.45791	-1.78816	0.0849682	0.22142	-4.71406	313	328	296	232
CCBL2	0.124205	4.58004	1.41689	0.16794	0.349694	-5.59673	602	630	595	704
CCDC101	-0.0179453	4.38749	-0.192031	0.849153	0.925334	-6.49956	520	613	533	548
CCDC102A	0.330602	3.16211	2.34449	0.0266517	0.0985532	-3.66173	223	206	249	271
CCDC104	0.0877626	4.92309	1.14244	0.263293	0.464952	-6.03895	754	828	781	844
CCDC106	0.131708	4.96952	1.63469	0.113711	0.269126	-5.40262	756	856	763	948
CCDC107	0.429982	1.05771	1.54037	0.135099	0.301263	-4.52197	39	58	59	66
CCDC109B	-0.162619	3.90259	-1.39345	0.174839	0.358852	-5.41682	395	458	313	428
CCDC11	0.120126	1.33869	0.452559	0.654478	0.806429	-5.48515	73	58	55	83
CCDC112	0.358152	3.14071	2.52676	0.0176731	0.0733359	-3.30067	185	235	247	272
CCDC113	0.129865	3.31256	0.961338	0.344905	0.550126	-5.72145	266	245	250	289
CCDC115	0.197973	3.86923	1.78057	0.0862282	0.223366	-4.8442	351	381	413	400
CCDC116	-0.234418	0.967372	-0.821222	0.418706	0.618597	-5.19495	48	66	48	45
CCDC117	0.154489	5.75535	2.31556	0.0284107	0.103383	-4.41078	1275	1479	1511	1453
CCDC12	-0.172093	5.79974	-2.54189	0.0170703	0.0716178	-3.95829	1470	1718	1215	1526
CCDC120	-0.00725544	3.40934	-0.0539004	0.957411	0.980556	-6.20161	304	269	278	271
CCDC121	0.0831749	2.15269	0.418879	0.678615	0.823024	-5.72823	102	130	126	112
CCDC124	-0.0255542	6.62044	-0.473558	0.639618	0.796853	-7.00965	2529	2815	2299	2786
CCDC125	-0.082356	5.01019	-1.09769	0.282022	0.484929	-6.11295	854	929	768	860
CCDC126	0.255733	3.05603	1.60058	0.121096	0.281439	-4.88705	166	250	206	270
CCDC127	0.0336499	4.88013	0.427006	0.672758	0.819639	-6.58381	740	826	720	830
CCDC130	-0.0516989	4.66998	-0.613641	0.544584	0.725701	-6.41972	684	708	636	662
CCDC132	0.0028158	4.69152	0.0313962	0.975184	0.988221	-6.61697	620	771	684	662
CCDC134	0.239923	2.47543	1.32965	0.19475	0.384134	-5.08692	150	126	143	170
CCDC136	0.623671	2.07056	3.12567	0.00421011	0.0259655	-1.92145	89	92	128	142
CCDC137	0.0905509	6.60126	1.72958	0.0951132	0.237818	-5.65944	2434	2628	2391	2827
CCDC138	0.102854	5.46434	1.55685	0.131139	0.296132	-5.65442	1093	1197	1160	1217
CCDC14	-0.277132	6.82664	-5.70458	4.60828e-06	0.000130949	3.81008	3237	3479	2638	2719
CCDC142	0.332912	3.46325	2.45871	0.0206355	0.0820356	-3.51081	237	291	347	299
CCDC147	-0.726186	0.274246	-1.94692	0.0620065	0.177822	-3.93445	51	34	17	33
CCDC15	-0.207218	2.8527	-1.33253	0.193813	0.383089	-5.18569	189	228	177	172
CCDC150	-0.667443	4.59842	-7.16668	1.03997e-07	6.0597e-06	7.84812	850	793	476	521
CCDC154	0.19574	1.52195	0.818712	0.420112	0.619951	-5.32601	63	81	79	80
CCDC157	-0.17577	1.95447	-0.78513	0.439207	0.635799	-5.465	96	127	73	121
CCDC159	-0.320621	1.69427	-1.32958	0.19477	0.384134	-4.8895	115	82	70	79
CCDC162P	-0.00322932	0.203831	-0.00918877	0.992736	0.996905	-5.31208	32	29	32	27
CCDC163P	-0.166412	2.64307	-0.97896	0.336282	0.540957	-5.50386	184	172	133	174
CCDC167	-0.0596983	3.66194	-0.476074	0.637848	0.795795	-6.17033	311	387	279	370
CCDC169	0.842147	0.987483	2.78284	0.00970993	0.0474458	-2.61768	50	31	74	63
CCDC17	-0.117876	1.91585	-0.505672	0.617186	0.779728	-5.61978	81	136	77	114
CCDC171	0.64004	0.578841	1.88681	0.0699724	0.193879	-4.02687	37	27	59	39
CCDC173	-0.320082	2.13273	-1.63118	0.114453	0.270286	-4.60835	125	138	90	114
CCDC174	0.0497236	4.81701	0.605306	0.550025	0.728866	-6.47164	749	741	694	796
CCDC176	-0.294749	0.16528	-0.821885	0.418334	0.61818	-5.04183	32	34	20	33
CCDC18	-0.314104	4.24161	-3.14352	0.00402711	0.0251144	-2.22119	539	593	454	428
CCDC180	-0.759586	0.873593	-2.44959	0.0210656	0.0833881	-3.19199	57	70	47	28
CCDC183	-0.132638	1.48619	-0.537591	0.595259	0.763514	-5.48548	87	71	63	75
CCDC183-AS1	-0.0179249	2.30521	-0.094832	0.925148	0.964105	-5.85323	142	125	130	124
CCDC22	-0.239618	4.30347	-2.38515	0.0243469	0.0924612	-3.87844	548	603	497	449
CCDC23	-0.118466	3.66599	-1.00137	0.325531	0.529719	-5.7914	344	367	286	348
CCDC24	0.05326	0.805863	0.174479	0.862789	0.932859	-5.43068	35	59	43	49
CCDC25	0.174853	5.84888	2.86018	0.00806695	0.041546	-3.27714	1452	1464	1518	1663
CCDC28A	0.0566258	3.8572	0.484963	0.63161	0.790776	-6.22839	405	361	353	414
CCDC28B	-0.300941	3.8745	-2.6828	0.0123041	0.0567187	-3.15135	417	459	305	384
CCDC3	0.218563	0.855566	0.743752	0.463444	0.65816	-5.22222	43	46	55	46
CCDC34	-0.0191682	5.51121	-0.286197	0.77691	0.885383	-6.81459	1143	1330	1099	1259
CCDC39	0.183219	2.25911	0.945261	0.352901	0.557952	-5.42527	114	126	146	120
CCDC40	0.587014	1.34287	2.23927	0.0335673	0.116631	-3.55103	65	47	79	81
CCDC41	0.418509	4.86814	5.26668	1.48445e-05	0.000334506	3.0024	630	729	851	904
CCDC43	0.0598477	5.45139	0.869459	0.392253	0.594708	-6.45841	1080	1224	1166	1156
CCDC47	0.0429725	7.83052	0.933404	0.358876	0.563249	-6.90374	5458	6642	5876	6135
CCDC50	-0.00890422	5.64266	-0.135493	0.893226	0.948606	-6.88198	1247	1453	1194	1400
CCDC51	0.00732226	4.27466	0.0754491	0.940413	0.972754	-6.47853	472	568	480	529
CCDC53	0.226024	3.02942	1.57215	0.127552	0.290909	-4.9204	194	211	221	237
CCDC57	-0.138507	5.36614	-1.97049	0.0591062	0.172428	-4.95891	1165	1162	955	1088
CCDC58	-0.0256219	4.08075	-0.228453	0.821014	0.909954	-6.39181	486	435	386	487
CCDC59	0.112517	5.79058	1.85636	0.0743363	0.202241	-5.26461	1353	1510	1450	1541
CCDC6	0.292421	6.04104	5.04964	2.65857e-05	0.000536854	2.21157	1530	1668	1870	1916
CCDC61	-0.147866	3.23139	-1.0321	0.311173	0.514533	-5.62845	258	274	194	274
CCDC62	0.498474	-0.0619768	1.3126	0.200357	0.390849	-4.6272	25	18	28	30
CCDC64	0.00582508	0.463999	0.0178044	0.985926	0.993508	-5.36655	38	35	38	33
CCDC65	-0.265238	1.85621	-1.23061	0.229072	0.42575	-5.03784	95	118	87	84
CCDC66	0.047787	4.56798	0.530117	0.60036	0.767492	-6.43523	564	693	620	634
CCDC69	-0.165888	5.52836	-2.47607	0.019839	0.0798492	-4.02941	1263	1363	1137	1127
CCDC7	0.171947	0.744078	0.547455	0.588559	0.758563	-5.3038	52	34	45	46
CCDC71	-0.0520105	4.56383	-0.599879	0.553584	0.731702	-6.39399	606	689	582	625
CCDC71L	0.0473338	4.35723	0.510335	0.61396	0.777704	-6.37704	517	567	507	576
CCDC74A	-0.492377	2.24778	-2.297	0.0295945	0.106466	-3.56129	165	140	77	137
CCDC74B	0.0446335	0.609537	0.141375	0.888622	0.945519	-5.39041	33	48	36	44
CCDC77	-0.212201	4.12757	-2.05009	0.0501716	0.1541	-4.4614	497	515	377	469
CCDC78	0.0218379	3.8071	0.191515	0.849554	0.925448	-6.31167	381	366	341	391
CCDC8	-0.0806582	5.57215	-1.20301	0.239407	0.43756	-6.14934	1256	1377	1091	1320
CCDC80	0.634022	2.16765	3.28376	0.00283248	0.0191203	-1.58886	92	101	139	151
CCDC82	-0.142727	5.49279	-1.97991	0.0579801	0.170232	-4.97518	1142	1409	1118	1111
CCDC84	-0.3335	3.6534	-2.81317	0.00903129	0.0450626	-2.81938	354	406	268	315
CCDC85B	0.258702	5.66376	3.82966	0.000692496	0.00654697	-0.897239	1142	1357	1314	1577
CCDC85C	-0.035906	4.97277	-0.458366	0.650354	0.803957	-6.5975	799	910	810	802
CCDC86	0.275358	6.95451	5.86611	3.00202e-06	9.52057e-05	4.21609	2929	3131	3464	3625
CCDC88A	-0.0888034	6.97692	-1.86531	0.0730301	0.199689	-5.5109	3370	3612	3139	3207
CCDC88B	-1.69485	2.33215	-8.62105	3.07034e-09	3.39346e-07	9.60376	231	256	65	80
CCDC88C	0.240836	5.39876	3.44435	0.00188251	0.0140042	-1.79648	965	1123	1188	1196
CCDC9	-0.094442	4.9342	-1.14545	0.262066	0.463551	-6.03834	795	907	682	863
CCDC90B	-0.00415217	5.21433	-0.0547946	0.956705	0.980359	-6.77322	893	1113	942	986
CCDC91	0.194197	4.74978	2.36461	0.0254872	0.0956544	-4.04923	667	685	704	791
CCDC92	-0.750764	3.57548	-5.8062	3.5184e-06	0.000106981	4.47041	426	404	249	228
CCDC93	0.236954	5.36126	3.46793	0.00177207	0.0133466	-1.73015	1001	1034	1108	1210
CCDC94	-0.258146	4.81993	-3.2002	0.00349529	0.0226292	-2.23827	808	853	622	721
CCDC97	-0.1225	5.80296	-2.0228	0.0530901	0.160191	-4.97644	1530	1601	1332	1448
CCHCR1	0.117208	5.70098	1.86224	0.0734759	0.200496	-5.23245	1249	1439	1370	1446
CCM2	0.0288683	5.50309	0.436584	0.665882	0.814713	-6.75701	1128	1289	1119	1264
CCNA2	-0.288333	8.06728	-7.52378	4.27054e-08	2.87975e-06	8.33769	7664	8275	6073	6542
CCNB1	-0.213579	8.06868	-5.54463	7.05637e-06	0.00018682	3.2033	7457	8093	6133	6834
CCNB1IP1	0.148071	5.76598	2.39899	0.0236051	0.0902099	-4.24621	1293	1490	1416	1563
CCNB2	-0.197256	6.93479	-4.21815	0.000247559	0.00303745	-0.152347	3327	3722	2831	3110
CCNC	0.0439011	7.28579	0.950339	0.350362	0.555332	-6.79818	3827	4449	4041	4194
CCND1	0.120706	1.29675	0.435605	0.666583	0.81507	-5.48106	76	52	75	58
CCND2	-0.1279	5.68048	-1.963	0.0600144	0.17421	-5.05277	1314	1575	1236	1315
CCND3	0.00753708	7.37999	0.168596	0.86737	0.934962	-7.25862	4193	4752	4045	4649
CCNDBP1	-0.194675	5.71884	-3.16597	0.00380774	0.0240811	-2.54012	1447	1583	1218	1341
CCNE1	0.598078	5.13071	7.36439	6.34114e-08	3.92474e-06	8.30541	716	818	988	1265
CCNE2	0.505947	3.54462	4.10944	0.000330636	0.0037618	0.239425	240	287	340	383
CCNF	-0.137203	7.30229	-2.977	0.00607491	0.0339347	-3.30694	4105	4812	3804	4020
CCNG1	0.0903832	7.27401	2.01433	0.0540267	0.162045	-5.30457	3839	4227	4091	4207
CCNG2	-0.0738639	1.93097	-0.349552	0.729384	0.856355	-5.68622	91	120	88	105
CCNH	-0.0234738	5.79984	-0.354684	0.725579	0.854276	-6.86741	1528	1494	1311	1565
CCNI	0.0446287	7.87009	1.06614	0.295795	0.498576	-6.77756	5818	6578	6104	6243
CCNJ	0.14756	5.18051	2.07324	0.0478081	0.149277	-4.72578	893	959	951	1032
CCNK	0.0631012	6.12429	1.12497	0.270493	0.47293	-6.3755	1773	1895	1811	1893
CCNL1	-0.0823198	6.57106	-1.53909	0.13541	0.301811	-5.94439	2458	2805	2402	2401
CCNL2	-0.446165	7.91799	-10.3147	7.19692e-11	1.58536e-08	14.7987	7517	7662	4985	5801
CCNO	0.0983203	1.66667	0.421917	0.676423	0.821547	-5.58478	74	91	71	101
CCNT1	0.145832	6.98857	2.82848	0.00870596	0.0439432	-3.58958	3050	3443	3523	3421
CCNT2	0.00674353	6.10396	0.11892	0.906218	0.954798	-6.99946	1721	1973	1710	1875
CCNY	0.0732638	6.45842	1.38723	0.176705	0.361298	-6.1318	2157	2456	2298	2390
CCNYL1	0.07856	3.54889	0.631919	0.53275	0.71668	-6.0496	275	338	313	312
CCP110	0.0907679	5.52207	1.36528	0.183424	0.369716	-5.93531	1138	1255	1228	1236
CCPG1	-0.0480671	3.8715	-0.422489	0.67601	0.821262	-6.26101	412	389	340	408
[truncated: 13,277 more rows]

## Sheet: 12h_down
Supplemental Table 6: RNA transcriptome analysis of AID-KMT2D K562 cells with 5-Ph-IAA treatment for 6 hours, 12 hours and 24 hours vs. without 5-Ph-IAA treatment grown in the expansion culture.
gene_name	logFC	AveExpr	t	P.Value	adj.P.Val	B	C13_D6_1	C13_D6_2	C13_I12_1	C13_I12_2
ABAT	-1.20884	4.36059	-12.1153	1.96652e-12	8.97765e-10	17.9179	817	859	362	340
ABC7-43041300I9.1	-0.910362	1.68595	-3.97123	0.000476901	0.00495991	-0.16256	114	122	61	60
ABCA7	-0.64781	5.0837	-8.69151	2.60688e-09	3.02529e-07	11.4217	1099	1182	686	721
ABCB9	-0.674691	2.76672	-3.98355	0.000461624	0.00484444	-0.0132461	248	216	122	158
AC000078.5	-0.775285	1.5695	-3.27478	0.00289747	0.0194552	-1.63272	96	112	58	59
AC003665.1	-0.865118	0.191992	-2.45237	0.0209337	0.0829603	-3.22564	42	40	20	23
AC004987.9	-0.98709	0.854571	-3.27727	0.00287927	0.0193704	-1.74189	72	64	36	30
AC005076.5	-0.910341	0.782164	-2.81455	0.0090014	0.0449296	-2.58271	77	52	26	39
AC005546.2	-1.21968	-0.306976	-2.5996	0.0149416	0.0652483	-3.08089	33	33	6	28
AC006126.4	-0.995731	1.80373	-4.43696	0.000137917	0.00193417	0.873772	122	142	68	60
AC006262.5	-0.606334	1.05691	-2.13703	0.0417987	0.136225	-3.69401	56	83	45	42
AC009005.2	-0.5932	1.31481	-2.18206	0.037973	0.127394	-3.64102	97	69	54	50
AC010525.6	-0.987893	0.534341	-3.02875	0.00535072	0.0310789	-2.25066	56	53	22	31
AC018470.4	-1.10759	-0.241776	-2.77672	0.00985273	0.0479752	-2.81105	35	31	13	16
AC062029.1	-0.793862	0.834983	-2.65499	0.0131332	0.0593808	-2.85076	60	65	39	31
AC092301.3	-0.951659	0.205673	-2.65636	0.013091	0.0592428	-2.91426	48	38	20	22
AC137934.1	-0.606498	3.5225	-4.60798	8.71632e-05	0.00136462	1.4827	396	368	212	273
ACACB	-0.772079	2.06348	-3.76289	0.000824938	0.0074598	-0.550877	152	141	82	83
ACKR2	-0.912416	2.82052	-5.33151	1.24766e-05	0.000293993	3.20594	286	237	134	132
ACP5	-0.626748	2.54243	-3.55169	0.00142842	0.0114126	-1.00688	178	212	104	141
ACRBP	-0.997929	0.00589869	-2.66747	0.0127548	0.0580953	-2.92676	32	44	18	18
ADAM19	-0.677784	5.32542	-9.35396	5.77947e-10	9.04325e-08	12.8928	1287	1438	837	811
ADAM8	-0.998801	1.27525	-3.83739	0.000678578	0.00642412	-0.550557	87	96	43	45
ADCK1	-0.610112	3.90729	-5.56114	6.75218e-06	0.000180136	3.86781	495	501	300	330
AGRN	-0.618924	7.23171	-14.0326	6.28605e-14	7.28448e-11	21.8857	4779	5239	3030	3274
AKR7A2P1	-1.21177	-0.262147	-2.9082	0.00718292	0.0381937	-2.6233	31	36	19	10
AL592188.7	-1.06206	1.98274	-2.9709	0.00616623	0.0343072	-2.23495	267	90	59	82
ALPK1	-0.753141	1.89401	-3.52821	0.00151763	0.0119001	-1.07594	119	140	70	78
AMHR2	-1.96772	2.86197	-11.6369	4.93334e-12	1.80794e-09	15.0324	377	395	92	98
ANGPTL4	-0.943375	0.738976	-3.08395	0.00466924	0.0280759	-2.1149	56	68	27	35
AP000442.1	-1.12147	-0.0268282	-2.96944	0.00618828	0.0343887	-2.47201	38	39	14	20
AP006222.2	-0.706197	3.86212	-6.00385	2.0863e-06	7.10363e-05	4.97612	509	488	307	284
APLP1	-0.726039	1.91351	-3.35752	0.00234951	0.0165011	-1.43687	137	123	76	75
APOBEC3F	-0.604749	1.54586	-2.52801	0.0176225	0.0732132	-3.06676	100	93	57	65
APOBR	-0.857218	0.989676	-3.0318	0.00531073	0.030894	-2.16909	67	76	34	42
APOL1	-0.687452	5.79433	-11.0119	1.70611e-11	5.16505e-09	16.346	1859	1925	1115	1156
AQP7	-1.21218	0.254299	-3.35299	0.0023767	0.0166276	-1.77276	38	61	18	22
ARHGAP23	-0.654077	1.0234	-2.11853	0.0434681	0.139833	-3.72003	68	69	27	63
ARHGEF40	-0.852833	2.82526	-5.41733	9.91527e-06	0.000248566	3.41302	250	261	133	140
ATP1B2	-1.7071	3.78737	-13.2715	2.35894e-13	2.04238e-10	19.0091	610	731	212	186
ATP2A3	-1.0556	4.90491	-13.0993	3.20701e-13	2.23304e-10	19.9043	1115	1208	506	574
ATP5I	-0.620495	4.7379	-4.85881	4.44104e-05	0.000793913	1.96788	869	919	405	761
BAIAP3	-0.92184	1.54612	-3.78229	0.000784082	0.00717236	-0.593409	99	116	60	50
BCL3	-1.2748	0.846806	-4.21199	0.000251654	0.00307191	0.00962415	80	70	28	31
BMF	-0.821338	1.73516	-3.54152	0.00146643	0.0116292	-1.06486	103	135	70	60
C12orf79	-1.01578	0.265396	-2.93413	0.00674449	0.0366175	-2.46223	43	48	20	23
C17orf99	-1.09471	1.00994	-3.80484	0.000739084	0.00685709	-0.700101	80	77	39	32
C3AR1	-0.991447	0.178392	-2.73349	0.0109178	0.0518734	-2.79834	46	39	23	18
C3orf83	-0.634247	0.758636	-2.09972	0.0452257	0.143859	-3.7358	50	63	31	39
CAPG	-0.670907	2.31077	-3.56186	0.0013914	0.0112004	-0.981673	161	174	108	96
CCDC150	-0.667443	4.59842	-7.16668	1.03997e-07	6.0597e-06	7.84812	850	793	476	521
CCDC180	-0.759586	0.873593	-2.44959	0.0210656	0.0833881	-3.19199	57	70	47	28
CCDC88B	-1.69485	2.33215	-8.62105	3.07034e-09	3.39346e-07	9.60376	231	256	65	80
CCDC92	-0.750764	3.57548	-5.8062	3.5184e-06	0.000106981	4.47041	426	404	249	228
CD19	-1.04039	1.15646	-3.40937	0.00205868	0.0149787	-1.43124	106	70	30	52
CD80	-0.78242	1.31683	-2.96726	0.00622128	0.0345307	-2.25603	96	80	43	55
CERS4	-0.70182	3.02577	-4.42347	0.000142992	0.00198536	1.04078	307	254	161	169
CLCNKA	-1.15779	0.342077	-2.9322	0.00677632	0.0367616	-2.45413	40	64	12	38
CLEC4D	-0.853301	0.658433	-2.7507	0.0104815	0.0503329	-2.70452	56	57	30	30
CNN1	-1.17082	4.30726	-11.9063	2.92994e-12	1.20007e-09	17.5308	752	845	334	351
COL4A2	-1.6981	-0.208862	-4.21017	0.000252879	0.00307563	-0.602134	44	39	13	11
COL6A4P2	-0.859076	0.372563	-2.52098	0.0179086	0.0741587	-3.1052	50	43	26	23
COL7A1	-1.31377	2.32533	-6.75142	2.98456e-07	1.46349e-05	6.12029	203	220	89	76
COL9A3	-1.13804	0.758295	-3.45349	0.00183896	0.0137242	-1.4447	62	73	19	44
CORO6	-1.31539	2.02324	-6.24221	1.11572e-06	4.30905e-05	4.83466	170	174	62	71
CPXM1	-0.630998	3.05024	-4.30308	0.000197343	0.00255172	0.748564	273	281	155	191
CRB2	-0.97821	2.42729	-5.2824	1.42318e-05	0.000325937	2.97975	198	206	107	92
CRIP2	-2.77052	-0.101094	-7.03732	1.44116e-07	7.93267e-06	3.63964	56	75	11	7
CRYAB	-1.16103	0.250779	-2.89847	0.00735436	0.0387943	-2.52648	64	35	27	15
CRYGS	-0.715719	1.15903	-2.35168	0.0262304	0.0975349	-3.35524	59	97	60	34
CSF3R	-1.93373	-0.401502	-4.52549	0.000108771	0.00161937	-0.138263	43	36	6	15
CTB-131B5.5	-0.972865	1.65664	-3.82864	0.000694355	0.00655565	-0.473717	102	135	74	46
CTB-33G10.1	-0.608709	1.12807	-2.25864	0.0321833	0.113035	-3.5061	70	74	46	45
CTB-63M22.1	-0.599086	3.11527	-3.11282	0.0043467	0.0265795	-2.05065	274	303	120	273
CTD-2213F21.2	-0.977377	-0.259483	-2.44967	0.0210617	0.0833881	-3.27899	32	30	16	14
CTD-2313J17.5	-0.797664	0.716419	-2.5418	0.0170739	0.0716178	-3.04695	49	68	26	39
CTD-2562J17.2	-0.838634	0.906835	-2.8903	0.00750113	0.0393507	-2.43482	61	73	37	35
CTD-3064M3.7	-1.31535	0.681112	-3.89733	0.000579587	0.00570416	-0.658672	81	57	20	33
CTF1	-0.665023	2.00964	-3.175	0.00372284	0.023684	-1.81753	134	137	90	76
CTSS	-0.924235	1.2517	-3.50045	0.00163005	0.0125553	-1.22969	78	98	45	44
CXorf65	-1.15972	0.0431321	-2.99133	0.00586567	0.0331898	-2.42223	35	48	12	25
CYP2E1	-0.862896	0.536279	-2.67885	0.0124188	0.0571151	-2.83722	51	53	29	26
CYP2S1	-0.674584	1.43686	-2.61443	0.0144361	0.063559	-2.90711	105	80	55	55
DAB2IP	-1.06508	3.88297	-9.48989	4.27302e-10	7.16941e-08	12.8193	556	590	260	269
DACT3	-0.588384	1.9826	-2.79622	0.00940487	0.0462473	-2.58599	117	144	72	96
DAPP1	-0.606332	2.69583	-3.54105	0.00146819	0.0116292	-1.0381	185	248	120	154
DEGS2	-1.09877	0.374158	-3.23774	0.00318091	0.0210218	-1.93067	52	49	23	22
DES	-0.854223	5.13997	-11.4579	7.00504e-12	2.37932e-09	17.1205	1226	1321	674	688
DHDH	-1.40086	-0.497905	-3.35333	0.00237464	0.0166276	-2.00585	28	33	9	13
DMBX1	-0.780456	3.55347	-6.34106	8.61963e-07	3.48944e-05	5.77074	394	433	219	246
DMTN	-0.739775	4.16835	-6.90426	2.02e-07	1.04574e-05	7.19972	650	600	355	366
DNAJC22	-0.974357	0.0419108	-2.47893	0.0197107	0.0794246	-3.2019	30	48	25	14
DNALI1	-0.593995	1.98512	-2.83894	0.00848999	0.0430873	-2.50171	128	132	89	78
DUSP13	-0.875903	3.08358	-5.43914	9.35349e-06	0.000238129	3.51354	344	278	148	176
DYRK1B	-0.739297	3.52961	-5.89412	2.78757e-06	9.00688e-05	4.68241	375	428	211	254
DYSF	-0.788741	5.09072	-10.3721	6.37737e-11	1.47028e-08	15.0038	1139	1268	672	675
EBI3	-1.54454	-0.214372	-3.78021	0.000788373	0.00719455	-1.27915	36	42	16	10
EFEMP2	-0.932377	-0.156062	-2.31358	0.0285349	0.103672	-3.45525	32	34	11	24
EIF5AP2	-1.13479	-0.223343	-2.70041	0.0118048	0.055018	-2.91983	30	38	9	23
ELSPBP1	-1.91292	0.575778	-5.73608	4.23814e-06	0.000123474	2.45795	69	86	20	19
EMP3	-0.760546	5.58092	-11.5581	5.75397e-12	2.00324e-09	17.3861	1623	1728	886	1027
ENTPD3	-1.30859	0.566892	-4.03268	0.000405322	0.00436993	-0.45853	55	70	23	25
ERBB3	-1.286	1.5144	-5.04081	2.72245e-05	0.000544724	2.01202	105	136	38	58
ESRRB	-0.672329	1.62123	-2.80746	0.00915559	0.0455109	-2.55072	110	98	68	58
ETV2	-0.874049	0.380756	-2.42148	0.0224438	0.0872807	-3.25789	41	54	16	37
EXOC3L1	-0.603266	0.877447	-2.06435	0.0487043	0.151027	-3.79341	61	60	33	44
EXOC3L2	-0.847601	3.23634	-6.12484	1.51751e-06	5.41867e-05	5.19021	339	340	173	191
EXOC3L4	-1.19217	2.30357	-5.6589	5.20364e-06	0.000145222	3.76404	226	179	71	99
EXPH5	-0.717724	1.92636	-3.40996	0.00205557	0.0149638	-1.32518	127	134	75	78
F2RL3	-0.676261	1.66377	-2.90236	0.00728539	0.0385429	-2.36787	114	101	63	66
FAM134B	-1.5577	0.15849	-4.17276	0.00027938	0.00331683	-0.445697	41	63	15	18
FAM214B	-0.771505	3.35846	-5.45877	8.87511e-06	0.000228035	3.5964	386	337	186	221
FAM90A1	-0.698538	1.28713	-2.59583	0.0150727	0.0656766	-2.93881	72	96	39	62
FAXDC2	-0.728978	3.74692	-6.23926	1.12436e-06	4.31346e-05	5.54875	465	464	254	287
FBLN2	-0.752732	2.79752	-4.65656	7.64981e-05	0.00123443	1.59144	251	234	133	144
FCGR2A	-1.09749	1.10071	-3.84527	0.000664663	0.00632679	-0.591877	94	75	38	37
FDXR	-0.739476	5.19224	-9.3972	5.24875e-10	8.40162e-08	12.9812	1142	1409	677	797
FGFR3	-0.774866	4.30467	-8.02592	1.25548e-08	1.12799e-06	9.84733	684	705	376	408
FHIT	-1.16064	1.00993	-3.96694	0.000482344	0.00500158	-0.387057	68	95	29	41
FOS	-0.931867	1.63282	-3.93105	0.000530294	0.00532124	-0.26107	116	113	62	54
FOXA3	-0.830426	1.44665	-3.09798	0.00450974	0.0273891	-1.99535	89	107	37	74
FREM1	-0.851362	2.43816	-4.48806	0.00012026	0.00173368	1.1453	203	187	116	94
FRS3	-0.586934	2.27845	-2.95317	0.00643902	0.0353727	-2.29048	160	160	81	128
FYN	-0.609687	3.76436	-5.30772	1.32979e-05	0.00030916	3.23201	425	478	263	309
GAGE1	-0.990906	-0.0382854	-2.51948	0.01797	0.0742917	-3.15217	29	45	22	14
GAL3ST4	-2.17766	0.396201	-6.06664	1.76831e-06	6.21857e-05	2.71413	75	75	12	20
GALNT6	-0.729051	3.26882	-5.39137	1.06287e-05	0.000258769	3.42332	324	342	190	198
GAS6	-0.730224	2.85496	-4.44748	0.000134082	0.00189373	1.09384	222	279	159	134
GDF2	-0.982097	1.64515	-4.09523	0.000343351	0.00387167	0.0900255	99	139	55	60
GLI1	-1.11445	0.257706	-3.10087	0.00447749	0.0272286	-2.192	45	49	15	28
GMFG	-0.952234	0.199728	-2.69911	0.0118412	0.0551324	-2.84842	43	42	19	23
GMPPA	-0.794472	6.76829	-16.0929	2.27372e-15	3.95798e-12	25.1179	3656	4070	2019	2287
GP6	-0.821541	1.35559	-2.98579	0.00594577	0.0334278	-2.21828	91	90	65	38
GPR133	-2.04222	-0.600313	-4.97744	3.22803e-05	0.000615976	0.501186	34	37	9	7
GPR153	-0.638154	1.74325	-2.69829	0.0118639	0.0551839	-2.76186	89	139	69	70
GPR89B	-0.801496	1.78864	-3.3529	0.00237725	0.0166276	-1.45457	141	106	72	63
GPRC5C	-0.855806	1.2836	-3.29354	0.00276332	0.0187534	-1.631	88	87	47	46
GPSM3	-0.643031	4.06279	-6.21087	1.21106e-06	4.55819e-05	5.49555	548	574	332	362
GRIK1	-0.884641	0.0594775	-2.41385	0.0228319	0.0881824	-3.29431	37	38	21	18
GSN	-0.690007	2.90595	-4.42242	0.000143397	0.00198701	1.03571	247	265	132	176
GTF2IRD2B	-0.803095	2.67706	-3.76067	0.000829737	0.00749832	-0.532144	291	179	108	143
GUCY1B2	-0.91501	-0.318704	-2.23077	0.0341909	0.118202	-3.57898	29	29	18	12
GVINP1	-0.695412	1.29076	-2.66808	0.0127368	0.0580561	-2.80975	88	79	45	54
HDAC5	-0.633318	5.22122	-8.54032	3.70647e-09	4.00126e-07	11.0793	1141	1362	754	803
HERC2P10	-0.831889	0.201343	-2.32186	0.0280187	0.102224	-3.41678	37	45	17	28
HEYL	-0.747432	0.643516	-2.39537	0.0237969	0.0908615	-3.28492	54	54	27	35
HFE2	-1.68156	0.805887	-5.23687	1.608e-05	0.00035771	1.85151	87	80	31	20
HIST2H4A	-1.63371	0.209459	-3.71523	0.000934312	0.00824539	-1.20108	85	35	18	15
HOXC13-AS	-1.7693	0.462928	-5.04944	2.65998e-05	0.000536854	1.22988	55	83	20	18
HRC	-0.828612	3.04253	-5.62486	5.69741e-06	0.000155878	3.95484	289	301	146	175
hsa-mir-8072	-0.741804	0.859822	-2.4123	0.0229112	0.0883092	-3.25299	72	55	29	44
ID3	-0.960411	1.69678	-4.05447	0.000382574	0.00419836	0.0163303	122	121	48	74
IDS	-0.620964	4.11113	-5.97844	2.2309e-06	7.46815e-05	4.91444	533	619	364	360
IDS	-0.620964	4.11113	-5.97844	2.2309e-06	7.46815e-05	4.91444	4	6	2	4
IFITM2	-0.648388	1.17028	-2.33104	0.0274568	0.100781	-3.3898	66	86	36	59
IGIP	-0.630361	1.8406	-2.83942	0.00848019	0.0430532	-2.49388	101	140	72	77
IKBKE	-0.588172	1.25505	-2.21775	0.0351671	0.120417	-3.57925	85	72	51	49
IL10RA	-0.635946	4.85215	-7.91877	1.6258e-08	1.39759e-06	9.64245	907	1030	577	627
INHA	-1.56153	0.911591	-4.96702	3.31977e-05	0.000632436	1.44914	98	77	22	35
ITGAM	-0.649565	1.9421	-2.98686	0.00593015	0.0333535	-2.20327	128	129	90	70
ITGB2	-0.772249	-0.0300773	-2.07553	0.04758	0.148732	-3.76636	31	37	18	20
JUP	-0.987335	7.41214	-22.5371	4.70559e-19	2.18433e-15	33.3572	6064	6843	3028	3260
KAZALD1	-1.09669	2.06079	-4.93904	3.57912e-05	0.000673552	2.06354	187	144	68	79
KB-318B8.7	-0.815998	0.124973	-2.09135	0.0460282	0.145646	-3.74208	51	29	24	18
KCNE3	-1.1611	-0.166973	-2.97035	0.00617448	0.0343257	-2.50531	31	40	15	15
KCNH5	-0.762675	1.41355	-2.90512	0.0072367	0.0383733	-2.36824	86	99	65	43
KCNN4	-0.905521	1.30753	-3.51588	0.00156662	0.0122025	-1.1875	88	93	47	46
KIAA1324	-0.984271	-0.0842678	-2.48824	0.0192979	0.0782594	-3.20301	26	47	17	17
KIF25-AS1	-2.07063	-0.546084	-4.84523	4.60622e-05	0.00081611	0.326839	45	31	6	11
KLHDC8A	-1.36479	-0.219179	-3.40733	0.00206944	0.0150256	-1.85481	37	36	15	12
KLHL30	-1.21103	-0.0515189	-3.16831	0.00378555	0.0239734	-2.16816	41	37	17	15
KLK1	-1.42085	0.465854	-4.21108	0.000252266	0.00307229	-0.197512	64	57	19	24
KM-PA-2	-1.7483	2.55886	-3.49458	0.00165488	0.0127114	-1.13101	121	663	109	66
KREMEN2	-0.797657	2.626	-4.65281	7.7272e-05	0.00124547	1.56157	226	211	120	122
KRT19	-1.62373	6.00687	-26.8	5.29355e-21	7.37179e-17	36.4123	2927	3142	917	986
KRT8	-0.619251	7.20522	-13.92	7.617e-14	7.45832e-11	21.6955	4761	5072	2969	3219
LAMB2	-0.624299	3.6376	-4.99527	3.07691e-05	0.000597615	2.44888	429	403	234	287
LGALS1	-0.682756	4.57208	-6.77602	2.8023e-07	1.39374e-05	6.89235	808	816	407	579
LILRP1	-1.15206	0.151545	-2.89772	0.0073676	0.0388494	-2.54622	38	50	30	12
LINC00304	-1.39213	-0.426737	-3.34554	0.00242213	0.0168822	-2.0079	34	30	10	13
LINC00482	-1.73699	0.412959	-5.06393	2.55842e-05	0.000522413	1.21638	60	70	17	20
LINC00520	-1.03707	1.99863	-4.83668	4.71334e-05	0.000831913	1.81703	163	145	66	78
LINC00885	-0.912092	0.562894	-2.86494	0.00797494	0.0411635	-2.52422	52	56	26	29
LINC01002	-0.709129	1.72752	-3.0619	0.00493095	0.0292265	-2.05185	109	117	76	59
LINC01006	-1.49972	-0.16232	-3.79074	0.000766912	0.00706351	-1.23586	38	42	11	16
LINC01036	-0.822167	0.624122	-2.43383	0.0218283	0.0856044	-3.22538	63	48	21	41
LRP1	-0.706765	3.17629	-4.63871	8.02551e-05	0.00127876	1.56797	265	359	197	172
LRRC56	-0.664209	2.30329	-3.46808	0.00177142	0.0133466	-1.18921	165	169	85	120
LTBP4	-0.596593	6.70153	-12.0095	2.40496e-12	1.04661e-09	18.2801	3328	3555	2065	2337
MAP1A	-0.614025	6.89865	-12.9688	4.0553e-13	2.68924e-10	20.0407	3774	4165	2432	2580
MCOLN3	-0.956041	2.38768	-5.18212	1.86248e-05	0.000406534	2.73708	181	211	88	107
METTL7A	-0.853139	4.99776	-11.0756	1.50019e-11	4.7481e-09	16.3629	1102	1207	590	645
MEX3B	-0.614226	3.98464	-5.74595	4.12847e-06	0.000121038	4.33203	513	540	306	359
MFI2-AS1	-0.843834	-0.140362	-2.06434	0.0487046	0.151027	-3.78427	35	30	11	26
MIR22HG	-0.643223	3.02249	-4.21871	0.00024719	0.0030356	0.544816	282	263	175	162
MIR503HG	-0.784017	1.1881	-2.86661	0.00794294	0.0410439	-2.45262	89	72	43	46
MPZ	-0.82669	1.10925	-2.95999	0.00633276	0.0349406	-2.28736	74	80	33	52
MPZL3	-0.819168	2.52426	-4.52673	0.000108411	0.00161801	1.24969	192	217	125	101
MRC2	-0.798248	4.88388	-9.38013	5.45202e-10	8.62783e-08	12.9167	941	1158	576	588
MST1P2	-0.77104	2.17502	-3.5358	0.00148823	0.0117489	-1.04277	155	163	64	123
MST1R	-0.60188	1.71885	-2.6759	0.0125052	0.0573419	-2.80311	102	115	70	68
MT-TI	-0.65574	1.34215	-2.43877	0.0215868	0.0848962	-3.21467	95	77	41	65
MT-TR	-0.730643	3.73009	-5.27136	1.46592e-05	0.000330865	3.14149	384	548	225	317
MT-TS1	-0.659025	1.15404	-2.16145	0.0396834	0.131017	-3.66186	51	108	41	51
MT-TV	-0.609556	2.57257	-3.43072	0.00194933	0.0143784	-1.28029	182	214	103	150
MTCP1	-0.785118	0.501396	-2.34782	0.0264559	0.0980333	-3.36353	57	43	29	26
MTFR2	-0.585144	4.74928	-6.9445	1.82351e-07	9.61901e-06	7.3004	826	948	525	618
MTND5P11	-1.83761	-0.668146	-4.36247	0.000168362	0.00224579	-0.46526	30	33	6	11
MTX1P1	-1.05859	3.06561	-2.43983	0.0215349	0.084788	-3.43451	719	150	165	133
MUC1	-1.13473	3.57544	-9.04524	1.15785e-09	1.53564e-07	11.7442	470	479	199	218
MYBPHL	-0.814927	0.398533	-2.27867	0.0308066	0.109463	-3.47093	51	43	17	37
MYEOV	-0.710929	1.81006	-3.06182	0.00493194	0.0292265	-2.05065	96	149	68	74
MYLK	-0.639932	4.89787	-7.75342	2.42988e-08	1.87991e-06	9.25254	1010	992	575	666
MYO1F	-0.941735	2.53635	-5.39933	1.04046e-05	0.00025736	3.28735	203	229	100	117
MYRF	-1.04078	4.79348	-11.7596	3.88674e-12	1.50352e-09	17.551	1033	1109	439	571
NARF-IT1	-0.813373	0.95431	-2.79739	0.00937867	0.0461619	-2.59517	75	63	34	41
NDRG2	-0.977709	4.81157	-11.8073	3.54474e-12	1.4104e-09	17.6493	1036	1082	497	542
NES	-1.00198	2.12815	-4.93667	3.60204e-05	0.000676038	2.08909	163	168	85	75
NFATC4	-1.06294	1.93525	-4.83781	4.69911e-05	0.000830455	1.79544	128	170	71	66
NHLRC4	-1.22366	0.619089	-3.78093	0.00078689	0.00719044	-0.890705	58	67	30	22
NMU	-0.615564	5.66023	-8.76427	2.2031e-09	2.64486e-07	11.5741	1535	1843	955	1177
NOXA1	-1.04999	1.12047	-3.63776	0.00114307	0.00958361	-0.993279	82	86	28	53
NT5DC4	-1.61722	-0.0325095	-3.84216	0.000670126	0.00636574	-1.10004	38	55	8	24
NTRK1	-0.977191	2.8818	-5.81675	3.42136e-06	0.000105178	4.36523	293	265	113	162
NXPH4	-1.44449	0.969079	-4.81371	5.01378e-05	0.000866276	1.21445	84	88	37	25
NYNRIN	-1.40339	2.46367	-7.42828	5.40987e-08	3.42444e-06	7.59753	251	231	87	88
OBSCN	-1.01895	5.08108	-12.6477	7.27858e-13	4.05446e-10	19.2276	1290	1297	628	607
OLFM2	-1.9584	0.73704	-5.86349	3.02293e-06	9.54588e-05	2.82275	101	77	19	24
OSBP2	-1.19352	5.60035	-17.5999	2.48098e-16	6.91003e-13	26.822	1834	2114	822	845
OSGEPL1-AS1	-0.922349	0.301215	-2.65871	0.0130192	0.0590186	-2.89752	43	47	26	20
OSGIN1	-0.789602	1.18577	-2.89024	0.00750223	0.0393507	-2.4093	88	73	40	49
PACSIN1	-0.691133	0.513831	-2.08541	0.046606	0.146893	-3.74991	50	47	22	37
PDE4C	-0.735324	0.743352	-2.37443	0.0249365	0.0941478	-3.31545	63	53	28	39
PEAR1	-1.66933	1.54046	-6.38637	7.66057e-07	3.18451e-05	4.64523	130	147	52	34
PFKFB4	-1.02885	3.92183	-9.08939	1.04751e-09	1.44302e-07	12.0303	564	601	244	309
PKLR	-0.75379	6.01197	-12.7728	5.788e-13	3.50451e-10	19.6579	2208	2295	1262	1319
PLCB2	-0.921117	1.32199	-3.53848	0.00147795	0.0116877	-1.13954	84	100	51	43
PLCD1	-0.66173	5.09275	-8.67352	2.7179e-09	3.12806e-07	11.3813	1065	1245	693	717
PLEKHA4	-0.888484	4.73034	-10.1455	1.02987e-10	2.17303e-08	14.4714	892	1055	464	552
PLEKHA6	-0.821773	1.665	-3.55375	0.00142086	0.0113652	-1.04851	115	111	57	66
PLN	-1.03528	0.490334	-2.91687	0.00703346	0.0376354	-2.4505	62	47	17	36
PLP2	-0.603687	3.07591	-4.13977	0.00030502	0.00353681	0.352386	253	306	178	177
PLTP	-0.841265	-0.028636	-2.18165	0.0380063	0.127444	-3.62546	42	29	17	20
PMEL	-1.2552	-0.294007	-3.04876	0.00509347	0.029929	-2.42303	29	38	16	11
PNMT	-0.85458	5.17779	-10.9918	1.777e-11	5.23335e-09	16.2403	1213	1411	628	776
PODXL	-0.594979	4.55944	-6.66355	3.73988e-07	1.75634e-05	6.61374	716	844	483	514
PPFIBP2	-0.749234	0.318183	-2.20959	0.0357916	0.121986	-3.57349	40	46	24	25
PPP1R13L	-0.672334	3.96918	-6.17699	1.32346e-06	4.86145e-05	5.40931	533	530	300	344
PRRT3	-0.692703	1.71818	-2.87747	0.00773737	0.0402505	-2.41653	113	112	50	88
PRSS8	-1.57499	-0.605616	-3.74245	0.000870226	0.00780848	-1.42098	29	31	11	8
PTGDR2	-1.17051	2.36369	-6.0462	1.86607e-06	6.49674e-05	4.65435	193	223	73	107
PTP4A3	-1.1983	5.84376	-17.451	3.06563e-16	7.11532e-13	26.7565	2252	2433	862	1120
PTPRR	-0.596118	4.77113	-7.08007	1.29358e-07	7.28953e-06	7.6326	826	983	545	610
RAB11FIP4	-0.913768	1.38755	-3.62718	0.00117491	0.00979749	-0.946998	96	96	49	49
RAB26	-0.771995	1.00962	-2.72262	0.0112023	0.0529004	-2.72281	75	66	37	42
RASGRP2	-0.720186	2.51349	-3.98942	0.000454507	0.00477696	-0.00462487	188	204	128	104
RBM47	-0.856297	2.61512	-5.03101	2.79509e-05	0.00055448	2.45198	208	234	121	115
RCAN3	-0.710918	2.76265	-4.41686	0.000145547	0.00200483	1.01543	212	255	133	142
REEP6	-0.641403	5.94811	-10.3675	6.44025e-11	1.47028e-08	15.045	2082	2064	1218	1350
RHOT1P3	-0.736513	0.730712	-2.4186	0.0225891	0.0876646	-3.24543	55	59	35	31
RN7SL1	-1.43298	0.694414	-4.36339	0.00016795	0.00224428	0.20295	83	61	25	25
RN7SL2	-1.45726	1.05075	-3.86116	0.000637487	0.00614421	-0.595968	142	60	36	28
RNA28S5	-0.803288	9.62659	-10.807	2.58845e-11	7.06798e-09	15.6857	27196	28867	17873	13549
RP1-179N16.6	-0.986591	0.720257	-3.00499	0.00567246	0.0322559	-2.25871	60	63	41	22
RP11-1055B8.4	-0.7777	1.62124	-3.22218	0.00330778	0.0216569	-1.73463	92	125	66	56
RP11-108L7.15	-1.09776	0.778156	-3.63819	0.00114181	0.00958192	-1.09363	64	70	28	32
RP11-10O17.1	-0.731854	0.727783	-2.41272	0.0228897	0.0882753	-3.25491	53	61	30	36
RP11-122K13.12	-0.926465	1.31288	-3.44464	0.0018811	0.0140012	-1.3291	101	83	51	42
RP11-143J12.3	-0.752682	0.227964	-2.12751	0.042651	0.138034	-3.69093	39	42	18	29
RP11-23J9.5	-0.607716	1.38667	-2.36389	0.0255285	0.0956959	-3.34521	96	78	50	59
RP11-261P9.4	-1.18428	-0.210736	-2.9869	0.00592961	0.0333535	-2.49186	32	37	16	13
RP11-269F19.2	-2.5634	-1.06202	-5.38433	1.08308e-05	0.000262312	1.01566	27	35	2	10
RP11-311H10.4	-0.807557	0.882945	-2.67497	0.0125326	0.0574416	-2.81359	52	81	32	40
RP11-378J18.8	-1.3064	-0.203681	-3.2314	0.00323198	0.0212588	-2.11982	29	45	12	16
RP11-385F5.5	-0.879604	0.0586539	-2.38038	0.0246078	0.0931472	-3.34265	31	45	19	20
RP11-386M24.4	-1.00142	-0.391253	-2.44559	0.0212566	0.0839528	-3.30184	28	29	13	14
RP11-453F18__B.1	-0.607916	1.51169	-2.43015	0.02201	0.0860744	-3.23844	86	102	70	51
RP11-465L10.10	-0.725971	0.428191	-2.13931	0.0415971	0.135695	-3.67254	37	57	23	31
RP11-486A14.1	-0.811984	1.34649	-3.18264	0.0036524	0.0233494	-1.83912	85	95	52	47
RP11-54O7.3	-0.868186	3.44824	-6.76994	2.84628e-07	1.4058e-05	6.76341	375	417	206	213
RP11-655M14.12	-1.20914	0.0129538	-3.0792	0.00472449	0.0283225	-2.29227	42	40	11	25
RP11-700P18.1	-1.07023	0.154011	-2.93942	0.0066583	0.0362626	-2.47787	41	45	15	25
RP11-805L22.3	-0.846886	1.01368	-2.92177	0.0069503	0.0373671	-2.36711	82	64	38	39
RP11-817O13.6	-0.937482	0.320188	-2.74073	0.0107322	0.0512189	-2.76468	42	50	24	22
RP11-867G23.8	-0.750409	0.23158	-2.15329	0.0403797	0.132718	-3.65508	42	39	22	24
RP13-104F24.3	-0.658916	0.537009	-2.0672	0.0484146	0.150462	-3.77624	47	50	29	30
RP13-20L14.6	-0.810645	0.808595	-2.65273	0.0132027	0.0595018	-2.85647	50	76	32	36
RP4-635E18.6	-0.954342	-0.19458	-2.2336	0.0339822	0.117779	-3.56645	34	31	9	27
RP4-682C21.2	-0.751009	0.398974	-2.11543	0.0437535	0.140556	-3.70643	37	55	34	20
RP5-1085F17.3	-0.810878	1.39881	-2.98006	0.00602961	0.0337222	-2.22637	70	123	52	51
RP5-968P14.2	-1.41011	-0.187718	-3.57867	0.00133225	0.0107982	-1.57645	36	40	13	14
RP5-991G20.2	-0.744811	0.252503	-2.15509	0.0402248	0.132428	-3.65213	40	42	21	26
RPS17	-0.705147	4.33498	-3.12237	0.00424472	0.0261028	-2.28509	417	1124	427	402
RRM2P3	-0.625485	0.831884	-2.07078	0.0480545	0.149811	-3.78155	48	72	33	41
S100A16	-1.18753	-0.108848	-2.98972	0.00588876	0.0332379	-2.46187	38	36	20	12
SAMD11	-1.09885	2.39264	-5.86944	2.97569e-06	9.48271e-05	4.28549	209	204	83	103
SAPCD1	-0.797945	1.23556	-3.00543	0.00566626	0.032247	-2.19029	72	95	46	46
SCARF1	-0.594612	1.84576	-2.73649	0.0108407	0.0516303	-2.69419	113	124	66	86
SCG3	-0.590578	2.89705	-3.75045	0.000852213	0.00767653	-0.566041	222	271	137	180
SCN7A	-1.51519	-0.421162	-3.61335	0.00121781	0.0100887	-1.5913	31	36	8	15
SELM	-1.25629	0.215564	-3.3746	0.0022496	0.015978	-1.75018	47	48	26	14
SEPT5	-0.839277	8.62769	-23.4543	1.68433e-19	1.1728e-15	34.5375	13701	14753	7276	8103
SHC2	-0.628417	2.54955	-3.54668	0.00144703	0.0115217	-1.01842	207	185	110	134
SLC25A21-AS1	-1.47397	-0.116404	-3.6956	0.000983393	0.0085592	-1.3647	41	41	10	19
SLFN13	-0.672799	1.34411	-2.48524	0.0194299	0.0785478	-3.13422	67	109	44	61
SMARCD3	-0.725946	3.38881	-5.17809	1.88276e-05	0.000407765	2.90537	390	337	195	227
SMG7-AS1	-1.10204	-0.145773	-2.68866	0.012136	0.0562359	-2.92199	37	33	22	11
SNCG	-1.0736	1.16928	-3.88508	0.000598595	0.0058495	-0.490068	88	87	32	49
SNED1	-0.846102	0.668751	-2.69814	0.0118682	0.0551839	-2.7917	50	64	33	28
SNHG9	-0.644924	0.708557	-2.11597	0.0437037	0.140461	-3.71025	50	59	34	33
SNORD104	-1.0076	0.304717	-2.69931	0.0118355	0.0551242	-2.83447	58	38	16	30
SNTA1	-0.611002	5.48404	-9.09958	1.02362e-09	1.4399e-07	12.3341	1389	1587	917	965
SOCS3	-0.766931	2.6849	-4.43389	0.000139057	0.00194624	1.04949	236	216	109	148
SORCS1	-1.18545	1.3418	-3.99392	0.000449128	0.00472678	-0.218695	100	103	65	29
SPATC1L	-0.599726	6.08697	-9.93691	1.6098e-10	3.15748e-08	14.1368	2049	2463	1371	1501
SRRM2-AS1	-0.822152	1.34653	-2.98779	0.00591663	0.0333044	-2.21508	68	119	46	53
SRSF10	-0.628346	4.35173	-2.90563	0.00722784	0.0383722	-2.78315	418	1094	393	469
SRSF10	-0.628346	4.35173	-2.90563	0.00722784	0.0383722	-2.78315	661	482	523	465
SSBP3	-0.712926	6.61793	-13.889	8.03352e-14	7.45832e-11	21.6297	3316	3442	1940	2045
SSPO	-2.51211	-0.075373	-6.40564	7.28623e-07	3.0655e-05	2.78416	62	59	12	8
ST3GAL3	-0.641019	3.31277	-4.82707	4.83672e-05	0.000850457	2.03376	313	354	195	218
STAB1	-0.789549	-0.0426855	-2.06628	0.048508	0.150618	-3.77877	29	39	22	16
STX16-NPEPL1	-0.775074	1.54977	-3.00661	0.00564994	0.032198	-2.16728	118	89	65	51
SYNE2	-0.591707	2.48055	-3.2678	0.00294895	0.0197154	-1.63545	197	172	110	125
TECRP1	-0.617897	1.80907	-2.72266	0.0112011	0.0529004	-2.71877	99	135	79	68
TFR2	-0.641344	6.40479	-12.1068	1.99847e-12	8.97765e-10	18.4651	2716	2977	1653	1876
TINAGL1	-1.78196	1.95699	-7.90431	1.68374e-08	1.41484e-06	7.83869	171	217	52	56
TLE6	-0.600972	0.933562	-2.05333	0.0498345	0.153573	-3.81292	65	61	32	49
TMC8	-0.677416	2.18731	-3.47424	0.00174362	0.0132181	-1.17669	158	151	89	97
TMEM173	-0.633069	3.02875	-4.12748	0.000315154	0.00363314	0.324625	274	273	143	200
TMEM191C	-0.829828	2.12865	-3.79972	0.000749084	0.00692679	-0.463729	174	140	97	74
TNNI3	-0.910229	2.88261	-5.81401	3.44633e-06	0.000105209	4.36295	259	283	144	135
TNNT1	-0.668937	5.31392	-8.97685	1.35282e-09	1.74439e-07	12.0629	1375	1323	776	862
TNXB	-1.58877	1.20887	-5.71414	4.49262e-06	0.000128852	3.08693	103	111	39	30
TPI1P1	-0.651919	1.80692	-2.84221	0.00842348	0.0428591	-2.48723	99	139	61	85
TRAIP	-0.587211	4.51897	-6.59134	4.5044e-07	2.05667e-05	6.43584	740	770	466	505
TRANK1	-1.00472	3.28313	-6.88566	2.11799e-07	1.09241e-05	6.97449	318	428	178	179
TRIM2	-0.744687	2.59178	-4.264	0.000219055	0.00276929	0.640823	188	233	105	138
UBASH3A	-0.76199	2.28118	-4.02687	0.000411616	0.00441955	0.063283	168	171	98	95
UNC5B	-1.04344	0.45983	-3.03628	0.00525256	0.0306954	-2.25384	62	45	21	28
USH1G	-1.43461	-0.535427	-3.44134	0.0018971	0.0140826	-1.87641	29	31	9	12
USP32P3	-1.01078	-0.0203331	-2.57301	0.0158899	0.068089	-3.07182	28	49	14	22
USP43	-1.13667	0.565527	-3.17573	0.00371601	0.0236513	-1.992	68	50	36	18
VIL1	-1.53254	2.4315	-7.93719	1.555e-08	1.36195e-06	8.53055	241	250	91	74
WDR31	-0.700213	2.89456	-4.395	0.000154321	0.00209782	0.969249	255	255	128	177
WDR66	-0.857399	3.57295	-6.46984	6.16761e-07	2.63467e-05	6.08097	437	426	193	270
XX-C2158C6.3	-0.791047	1.04754	-2.81014	0.00909693	0.0452604	-2.56493	74	71	44	37
ZC3H11B	-0.590336	1.67144	-2.5875	0.0153664	0.0666645	-2.96528	100	109	68	66
ZNF467	-1.62947	0.623075	-4.77416	5.57639e-05	0.000948191	0.886976	83	63	26	19
ZNF572	-0.800725	0.180489	-2.25381	0.0325236	0.113886	-3.51541	35	45	19	25
ZNF624	-0.622205	1.44815	-2.48525	0.0194296	0.0785478	-3.13823	77	106	51	63
ZNF846	-0.675995	1.0129	-2.41672	0.0226848	0.0878927	-3.24501	67	69	42	40

## Sheet: 12h_up
Supplemental Table 6: RNA transcriptome analysis of AID-KMT2D K562 cells with 5-Ph-IAA treatment for 6 hours, 12 hours and 24 hours vs. without 5-Ph-IAA treatment grown in the expansion culture.
gene_name	logFC	AveExpr	t	P.Value	adj.P.Val	B	C13_D6_1	C13_D6_2	C13_I12_1	C13_I12_2
AC005329.7	0.897255	0.611953	2.75576	0.0103563	0.049835	-2.7007	29	30	63	46
AC005943.5	0.646147	2.12631	2.93881	0.00666817	0.0362943	-2.30933	87	99	171	118
AC006538.1	0.799889	2.46379	4.45751	0.000130527	0.0018553	1.08096	100	125	171	208
AC006946.16	0.585198	1.65704	2.50103	0.0187438	0.0765249	-3.12253	72	66	86	115
AC108463.1	0.883456	0.206115	2.47996	0.0196645	0.0792612	-3.18239	19	26	44	37
ADAM11	0.591101	2.16951	3.05808	0.00497766	0.02936	-2.06619	94	102	142	144
ADAM22	0.960608	1.76971	3.79943	0.000749645	0.00692737	-0.512152	88	49	108	138
ADAMTS7	0.649335	0.875844	2.19601	0.0368534	0.12472	-3.59512	39	39	49	71
ADCY9	0.772959	4.47614	8.56785	3.47561e-09	3.81113e-07	11.0936	436	479	718	794
AIG1	1.0832	0.174221	2.94971	0.00649355	0.0356021	-2.45457	26	16	41	43
AIM1	0.64024	4.06351	6.13052	1.49503e-06	5.37848e-05	5.29556	360	359	531	552
AL353898.3	0.708278	0.371623	2.0885	0.046305	0.146212	-3.74418	23	31	36	50
AMIGO1	0.758998	3.13414	4.82157	4.90892e-05	0.000856394	2.01581	205	160	310	282
ANKRD10-IT1	0.619579	2.5641	3.43851	0.00191087	0.0141622	-1.26284	107	151	201	181
ANKRD13B	0.860849	4.51635	9.32084	6.22296e-10	9.31839e-08	12.7271	468	445	771	829
ANO7	0.736442	2.15007	3.77382	0.000801672	0.00727513	-0.517303	89	95	139	158
ANO7P1	1.0742	0.125576	2.91624	0.00704416	0.0376698	-2.5188	16	24	45	37
ARHGEF17	0.821888	0.843148	2.73137	0.0109728	0.0520815	-2.71887	40	32	65	58
ARID5B	0.595111	3.63844	4.98597	3.15485e-05	0.000605157	2.42493	273	271	380	414
ASAH2	0.900637	1.16198	3.24293	0.00313963	0.0207906	-1.74656	49	39	67	92
ASCL2	0.877943	1.51645	3.46484	0.00178619	0.0134239	-1.25282	43	73	91	111
ATP8B1	0.675398	1.74203	2.99506	0.0058123	0.0329434	-2.18497	64	78	97	123
BATF3	1.80212	-0.207633	4.50313	0.000115495	0.00168594	-0.145393	13	11	41	42
BMS1P20	0.791469	0.404075	2.35831	0.0258467	0.0964989	-3.3514	25	28	49	41
BRSK2	0.926553	0.874923	2.9132	0.00709636	0.0378636	-2.39754	29	43	48	88
C1orf172	0.895051	0.494583	2.72116	0.0112409	0.0530467	-2.77178	24	31	42	58
C22orf23	0.63378	1.35863	2.46854	0.020181	0.0807822	-3.16415	53	57	69	98
C4orf36	0.59895	2.14949	2.89996	0.00732782	0.0386982	-2.3904	83	112	118	169
C7orf13	0.638957	3.43726	4.7245	6.37286e-05	0.00105938	1.7771	203	265	365	339
CALB1	1.37794	1.83434	6.18792	1.2861e-06	4.78882e-05	4.58453	58	60	139	159
CAMSAP3	0.88006	2.13463	4.24342	0.00023142	0.00289329	0.533376	98	77	137	172
CARD10	0.77688	3.08529	5.42187	9.79555e-06	0.000247125	3.47628	164	184	272	305
CASC10	1.39102	1.15132	4.81055	5.05646e-05	0.000872568	1.33317	29	45	104	84
CASKIN1	0.932143	3.47683	7.13943	1.11378e-07	6.43587e-06	7.62776	214	219	357	444
CASKIN2	0.725106	4.12228	7.06966	1.32804e-07	7.36825e-06	7.59468	332	397	562	602
CASZ1	0.786795	0.794179	2.58109	0.015596	0.067243	-2.97716	41	30	57	60
CCDC136	0.623671	2.07056	3.12567	0.00421011	0.0259655	-1.92145	89	92	128	142
CCDC169	0.842147	0.987483	2.78284	0.00970993	0.0474458	-2.61768	50	31	74	63
CCDC40	0.587014	1.34287	2.23927	0.0335673	0.116631	-3.55103	65	47	79	81
CCDC80	0.634022	2.16765	3.28376	0.00283248	0.0191203	-1.58886	92	101	139	151
CCNE1	0.598078	5.13071	7.36439	6.34114e-08	3.92474e-06	8.30541	716	818	988	1265
CDR2L	0.838083	3.93176	7.67764	2.92467e-08	2.17802e-06	8.98356	287	326	522	538
CECR6	1.44331	0.499507	4.27539	0.000212494	0.00271238	-0.0574743	23	22	67	54
CERS1	1.10699	1.30858	4.24891	0.000228056	0.00285861	0.29919	42	48	83	106
CERS6	0.594389	4.95873	7.44041	5.24948e-08	3.33809e-06	8.50059	670	691	906	1083
CHORDC1	0.67952	6.6594	13.1254	3.06073e-13	2.23304e-10	20.3173	2004	2294	3281	3368
CKAP4	0.935501	2.90552	5.91248	2.65549e-06	8.72177e-05	4.60322	130	161	278	261
CLDN5	1.18803	0.22416	3.06382	0.00490755	0.0291286	-2.25965	32	13	43	47
CLVS2	0.93057	0.189283	2.62321	0.0141441	0.0625898	-2.96619	18	26	39	42
CMTM1	0.753596	0.874797	2.59341	0.0151576	0.0659272	-2.95227	37	38	56	67
CNRIP1	0.603054	2.09286	2.86333	0.00800604	0.0412934	-2.46045	108	80	123	149
CPEB2	0.971932	1.14688	3.34759	0.00240958	0.0168199	-1.54902	31	56	89	73
CRYM-AS1	0.958076	-0.154043	2.4228	0.0223773	0.0870951	-3.30296	14	20	37	28
CSAG2	1.69638	0.471358	2.59833	0.0149855	0.0653581	-2.98363	10	41	22	183
CSPG5	1.28916	2.86308	8.10195	1.04602e-08	9.52084e-07	9.33184	113	137	282	309
CTA-390C10.10	1.40378	0.343019	4.06239	0.000374621	0.00413178	-0.514828	20	21	46	61
CTC-428H11.2	0.791784	0.979123	2.79835	0.00935713	0.0461102	-2.59055	35	45	65	69
CTD-2031P19.4	0.745813	1.70887	3.22709	0.00326721	0.0214417	-1.71813	72	63	114	105
CTD-2044J15.2	0.714412	1.3951	2.84817	0.00830362	0.0423731	-2.47606	49	61	78	97
CTD-2619J13.16	0.923711	0.574964	2.4357	0.0217363	0.0853639	-3.22472	25	32	81	35
CTD-2619J13.17	0.70539	0.487548	2.18067	0.0380858	0.127649	-3.61273	29	29	46	46
CTD-3065J16.6	0.801848	-0.101848	2.11559	0.0437387	0.140541	-3.71597	19	18	29	34
DHFRP1	0.653912	4.61745	3.11217	0.00435367	0.0266034	-2.38494	866	326	724	862
DIRAS1	0.785268	4.47745	8.69762	2.57021e-09	3.01876e-07	11.3799	434	478	720	800
DISP2	0.659391	1.61108	2.80071	0.00930448	0.0459496	-2.56358	55	76	96	103
DMD	1.08233	-0.360384	2.65608	0.0130996	0.059248	-3.0052	12	16	28	30
DNAH17	0.635956	2.16493	3.20951	0.00341463	0.0222519	-1.74721	103	90	145	144
DNAJC3-AS1	0.63465	1.81399	2.92262	0.00693585	0.0373362	-2.32934	70	81	107	120
DUSP5	0.739009	0.821257	2.45726	0.0207034	0.0821878	-3.18043	29	45	57	61
EFCAB13	0.604766	1.75573	2.67263	0.0126015	0.0576129	-2.81146	61	87	106	110
F12	0.678187	2.9214	4.50378	0.000115296	0.0016848	1.23314	156	165	240	257
FAM101B	0.715658	3.68301	5.79855	3.59052e-06	0.000108463	4.45938	278	260	437	417
FAM107B	1.31468	0.297796	3.80078	0.000746995	0.00691206	-0.987609	19	22	46	54
FAM155B	0.604517	1.21868	2.23563	0.033833	0.117379	-3.54844	42	60	63	87
FAM157B	1.96443	1.94407	6.53227	5.24698e-07	2.31306e-05	5.24798	34	77	253	157
FAM203A	0.586725	3.02224	2.35762	0.0258865	0.0965958	-3.6013	171	188	153	427
FAM211B	0.650787	2.18185	3.3751	0.00224669	0.015978	-1.39219	91	103	137	158
FAM45B	0.780104	1.1702	2.82585	0.008761	0.0440574	-2.52777	41	51	62	93
FAM84B	0.745087	0.790642	2.4333	0.0218544	0.0856825	-3.22008	42	30	57	58
FAM86EP	0.777482	1.84755	3.43634	0.00192153	0.0142109	-1.27417	86	63	118	125
FBXL16	0.787095	2.53742	4.5071	0.000114273	0.00167172	1.20766	115	122	176	221
FBXO41	0.587888	3.48008	4.29033	0.000204178	0.00262063	0.694063	275	218	338	370
FGF22	0.796844	0.834265	2.67286	0.0125947	0.0576005	-2.81983	39	33	62	59
FLRT1	0.746374	1.21653	2.66082	0.0129552	0.058786	-2.82378	57	40	86	70
FOXD2	0.663673	1.54448	2.7074	0.011612	0.0543743	-2.73854	50	76	86	105
FOXD2-AS1	0.814137	2.24922	4.04506	0.00039224	0.00427412	0.101723	79	116	142	188
FZD8	1.53153	0.0154203	3.76556	0.000819178	0.00741252	-1.18885	9	26	42	47
FZD9	0.707079	1.94299	3.36847	0.00228497	0.0161854	-1.41176	79	82	115	140
GATA3	0.902566	0.863451	3.05114	0.00506363	0.0297917	-2.15086	39	32	62	66
GCSAM	0.764843	0.492385	2.30699	0.0289517	0.104941	-3.42539	30	27	53	42
GFI1	0.954229	0.374703	2.82805	0.00871483	0.043972	-2.61366	24	25	49	44
GJA3	0.591908	1.45979	2.35594	0.0259835	0.0968278	-3.36398	69	52	83	91
GNB1L	0.816477	5.10636	10.5621	4.28916e-11	1.127e-08	15.3881	627	773	1132	1247
GNG11	0.939871	0.103119	2.51886	0.0179958	0.0743243	-3.13488	26	16	38	38
GPR161	0.929479	2.49295	5.19963	1.777e-05	0.000390324	2.81632	116	103	194	208
GPSM1	0.851485	4.63434	9.70258	2.67682e-10	4.97032e-08	13.5513	480	514	798	938
GS1-124K5.4	1.00237	1.44597	3.96951	0.000479076	0.00497882	-0.22814	42	62	100	100
GS1-179L18.1	0.68389	3.40936	5.19246	1.81152e-05	0.000397278	2.94239	232	218	348	350
GS1-279B7.2	0.79652	0.595364	2.30406	0.0291387	0.105316	-3.42752	20	45	58	46
GSTM3P1	1.3452	0.279401	3.84826	0.000659466	0.0062933	-0.914883	20	20	44	56
GTF2IP1	0.789857	3.52126	6.09528	1.64004e-06	5.81149e-05	5.17327	250	220	383	399
HABP4	0.837512	2.51074	4.74203	6.07954e-05	0.00101637	1.75427	114	114	202	193
HIC1	0.73458	1.36924	2.71567	0.0113877	0.0535577	-2.72249	60	48	67	109
HMGN3-AS1	0.658791	1.45599	2.58318	0.0155209	0.0670422	-2.96422	61	56	72	109
HNRNPA1P59	1.07486	-0.119364	2.6973	0.0118916	0.0552745	-2.90261	17	16	42	28
HPGD	0.76337	0.119064	2.12834	0.0425762	0.137932	-3.69185	20	24	32	41
HSPA1A	1.2355	6.60613	20.7885	3.72051e-18	1.29529e-14	31.167	1591	1829	3490	4315
HSPA1B	0.875769	5.59782	13.1215	3.08178e-13	2.23304e-10	20.2026	884	1042	1597	1818
HSPH1	0.595843	7.72739	14.5524	2.62822e-14	3.66006e-11	22.7468	4372	4905	6433	7117
ICOSLG	0.774735	3.24967	5.29941	1.35973e-05	0.000314544	3.19651	164	231	289	361
IFFO2	0.864229	1.58913	3.4454	0.00187746	0.0139816	-1.28252	64	55	120	92
IFIT1	1.02473	2.16726	5.08612	2.41033e-05	0.000499355	2.44288	74	95	172	161
IGFBP5	0.888337	0.704426	2.68231	0.0123185	0.0567663	-2.81479	21	47	59	56
INA	1.11454	1.03551	3.86037	0.000638801	0.0061521	-0.579531	43	32	69	87
INSIG1	0.647279	5.53191	9.79855	2.17169e-10	4.14287e-08	13.8522	983	1004	1434	1574
IQCH-AS1	0.737754	2.62043	4.32587	0.000185678	0.00244863	0.789851	117	139	183	231
IRX5	0.586069	1.29982	2.22753	0.0344315	0.118667	-3.56702	47	61	65	93
IVD	0.609013	3.25978	4.40345	0.000150872	0.00205784	0.987877	193	223	317	298
JAG2	0.590204	5.5107	8.89837	1.61853e-09	2.04906e-07	11.8835	932	1068	1372	1538
KAZN	0.673662	2.88007	4.27744	0.000211331	0.00270248	0.686639	153	160	211	274
KBTBD11	0.756968	2.44496	4.10549	0.000334121	0.00378598	0.260121	93	134	183	185
KCNH4	0.7298	2.87869	4.73758	6.15262e-05	0.00102735	1.79515	139	168	234	258
KCNJ4	0.647599	0.888884	2.23238	0.0340722	0.117944	-3.53922	35	44	54	66
KCNQ5	0.663775	4.40689	7.13419	1.12858e-07	6.49444e-06	7.7673	431	474	688	699
KIAA1024	0.904616	0.486289	2.7482	0.0105437	0.0505444	-2.72848	22	33	46	53
KIAA1147	0.636	3.66869	5.36082	1.15345e-05	0.0002759	3.36671	249	300	395	429
KLF11	0.588213	4.02198	5.5907	6.24035e-06	0.000169198	3.93825	347	364	512	522
KLF15	0.873695	2.92675	5.63762	5.50701e-06	0.000151264	3.96198	131	172	260	275
KLHL32	0.65089	0.749501	2.09638	0.0455447	0.144543	-3.74056	33	38	63	47
LA16c-60H5.7	1.21629	0.643273	3.83426	0.000684174	0.00647269	-0.778513	27	27	65	58
LFNG	1.39304	-0.315355	3.33157	0.00250957	0.0173269	-2.00432	9	18	34	33
LGALSL	0.926939	0.769374	2.97366	0.00612479	0.0341465	-2.30402	40	27	55	66
LINC00383	1.04968	0.330214	3.06563	0.00488573	0.0290515	-2.22929	24	22	48	45
LINC00638	0.852885	1.59404	3.59361	0.00128173	0.0104749	-0.974709	59	61	92	119
LL22NC03-2H8.4	0.706846	2.5647	4.11938	0.000322015	0.00368478	0.30102	112	137	181	212
LL22NC03-2H8.5	0.743981	3.0435	5.07746	2.46706e-05	0.000507478	2.63487	164	178	252	303
LL22NC03-N14H11.1	0.615855	2.5788	3.32092	0.00257828	0.0176612	-1.52581	104	160	165	223
LONRF1	0.631904	1.47818	2.57391	0.0158566	0.0679862	-2.98164	65	55	84	95
LRP3	0.64816	1.92693	3.07837	0.00473415	0.0283682	-2.01688	73	90	115	132
LRRC23	0.808444	0.475923	2.35441	0.0260717	0.0970091	-3.35421	32	24	56	40
LRRC3	0.750027	1.22774	2.74733	0.0105655	0.0506139	-2.66788	55	42	84	73
LRRC3DN	1.13826	0.158098	3.09521	0.00454085	0.0275417	-2.22383	16	24	48	38
LURAP1L	0.831822	0.448419	2.4528	0.0209131	0.0829123	-3.20459	20	36	47	47
MACROD2	1.47806	-0.0632893	3.8009	0.000746764	0.00691206	-1.16228	16	14	34	49
MAFA	0.896968	0.956804	2.96819	0.00620719	0.0344662	-2.28855	46	31	75	62
MAGEA2	0.723057	2.71923	4.24119	0.000232801	0.00290501	0.595437	146	129	231	208
MAGEE1	1.06427	0.4457	3.1209	0.00426025	0.0261704	-2.10959	31	20	48	53
MANEAL	0.812319	4.56493	9.24891	7.31074e-10	1.06051e-07	12.5868	454	506	781	849
MEG9	0.720577	2.55726	4.09369	0.000344764	0.00388131	0.240559	134	113	184	207
MICALCL	0.609813	1.23823	2.26888	0.0314727	0.111241	-3.49558	50	52	61	92
MICU3	0.870228	1.86334	3.69887	0.000975033	0.00850239	-0.71342	52	98	125	131
MIR1254-1	0.679625	1.79494	2.97053	0.00617182	0.0343246	-2.23382	73	73	127	102
MIR3176	0.660167	1.90568	3.00654	0.00565088	0.032198	-2.16285	91	70	119	124
MIR770	0.790628	0.553386	2.38262	0.0244852	0.0927839	-3.30786	22	39	53	47
MMP17	0.645347	2.20905	3.24354	0.0031348	0.0207684	-1.67576	89	110	127	176
MSMO1	0.722888	4.52189	7.59105	3.61782e-08	2.53174e-06	8.86227	417	550	747	789
MTRNR2L2	0.829121	0.40429	2.10083	0.0451204	0.143646	-3.727	43	16	55	37
MXD4	0.633718	5.69312	10.1351	1.05287e-10	2.1884e-08	14.5627	1059	1175	1588	1763
NAALAD2	0.807758	0.378871	2.16987	0.038976	0.129635	-3.62917	40	17	40	48
NAPSA	0.603276	2.10407	3.02257	0.00543267	0.0314314	-2.1366	98	89	131	143
NEFH	0.584979	5.15939	7.83767	1.97912e-08	1.62125e-06	9.44334	785	784	1060	1215
NKD2	0.88259	1.20028	3.32206	0.00257086	0.0176451	-1.58726	46	44	80	81
NKX3-1	1.36867	-0.233658	3.29355	0.00276327	0.0187534	-2.03147	19	10	31	39
NLRP6	1.00128	-0.0346499	2.60165	0.0148707	0.0650405	-3.03007	17	19	42	30
NOTCH1	0.723837	3.4493	5.40267	1.0312e-05	0.000255691	3.46539	204	253	381	350
NOTCH2	0.780644	3.88948	6.47924	6.01911e-07	2.57914e-05	6.14767	306	300	537	474
NPIPA7	1.38893	-0.128829	3.48021	0.00171709	0.0130525	-1.70173	24	129	18	23
NPIPA7	1.38893	-0.128829	3.48021	0.00171709	0.0130525	-1.70173	22	35	21	27
NPIPA7	1.38893	-0.128829	3.48021	0.00171709	0.0130525	-1.70173	18	12	41	35
NPIPA8	1.46306	1.53694	5.88215	2.87727e-06	9.27519e-05	3.72001	39	55	124	126
NR1D2	0.616398	3.94946	5.7529	4.05295e-06	0.000119579	4.34995	330	340	474	519
NRP2	1.05466	0.980313	3.7033	0.000963838	0.00844666	-0.901616	32	41	71	76
NRTN	0.70512	1.28573	2.74216	0.0106959	0.0510807	-2.67547	46	56	77	84
NTN3	0.898921	-0.153085	2.31863	0.0282191	0.102847	-3.44694	14	21	30	33
NUDT11	0.733761	0.381125	2.1034	0.0448772	0.143077	-3.72334	19	37	39	48
OGFRL1	0.803031	0.434924	2.41536	0.0227542	0.0880458	-3.26298	28	26	49	43
OTUD1	0.809561	0.656367	2.58097	0.0156002	0.067243	-2.98606	26	38	49	59
PALD1	0.915069	2.88835	5.70639	4.58616e-06	0.000130607	4.11426	123	169	241	289
PAN3-AS1	0.684902	0.64558	2.17767	0.0383315	0.128104	-3.61783	37	29	47	55
PAPPA	0.658687	2.64602	3.9937	0.000449394	0.00472678	0.0100009	129	138	192	216
PBX3	0.617359	2.61684	3.58968	0.00129483	0.0105449	-0.923821	126	140	170	227
PCAT6	0.670668	0.534958	2.08043	0.0470945	0.147778	-3.75755	28	33	40	55
PCOLCE2	0.593317	1.424	2.38431	0.0243927	0.0925794	-3.31303	63	54	81	89
PDE6D	0.791618	2.19482	4.01839	0.000420968	0.00450607	0.035166	79	109	148	165
PGBD5	1.27965	-0.506822	3.00914	0.00561495	0.0320598	-2.5287	9	15	27	29
PI16	0.981813	-0.213844	2.51146	0.0183027	0.0752978	-3.18536	15	17	31	31
PIGCP1	0.671728	1.36533	2.64493	0.0134458	0.0603434	-2.85123	55	54	73	96
PIGZ	0.78271	0.158159	2.1717	0.0388241	0.129345	-3.63118	24	21	31	45
PILRA	1.15637	-0.217619	2.89859	0.00735218	0.0387943	-2.62341	16	14	36	30
PNMA3	0.789041	1.64345	3.41687	0.00201961	0.0147561	-1.33396	60	67	97	116
PPM1E	0.627594	1.68028	2.72033	0.0112629	0.0531143	-2.71788	59	80	94	113
PRKAR2B	0.599925	8.09162	15.128	1.02908e-14	1.59233e-11	23.6744	5548	6384	8389	9072
PSMC1P1	0.699049	1.95414	3.08529	0.00465378	0.0280072	-2.00289	76	86	151	109
RAB15	0.895135	1.69442	3.83867	0.000676297	0.00641124	-0.440895	65	62	98	132
RAB40B	0.651104	3.63436	5.417	9.92409e-06	0.000248566	3.50727	269	263	391	416
RASL10B	0.673435	4.13914	6.57264	4.7272e-07	2.15134e-05	6.39141	363	387	528	630
RASL11B	0.852054	0.457778	2.5121	0.018276	0.075231	-3.1114	29	25	55	41
RBM12B-AS1	0.608918	0.877777	2.08335	0.046807	0.147174	-3.76564	41	38	61	56
RECK	0.622676	1.30578	2.34591	0.0265681	0.0983488	-3.37159	63	45	74	84
RELN	0.756026	5.27267	10.4388	5.54563e-11	1.37265e-08	15.1642	796	802	1283	1325
RHBDF2	1.00296	2.0953	4.59309	9.07181e-05	0.00141313	1.30973	67	97	129	190
RILPL1	0.815499	3.49211	6.16764	1.35629e-06	4.95319e-05	5.34419	220	236	337	443
RLTPR	0.668958	2.76603	3.92911	0.000533009	0.00534006	-0.141508	146	144	185	265
RN7SL381P	0.694073	1.74533	3.09454	0.00454833	0.0275494	-1.98553	72	69	100	121
RP1-80N2.2	0.860487	0.226494	2.28234	0.0305603	0.108884	-3.47214	33	16	35	46
RP1-80N2.3	0.626828	2.11021	2.92554	0.00688689	0.0371444	-2.33557	77	112	114	169
RP11-1277A3.1	0.592017	1.69988	2.58278	0.015535	0.0670614	-2.97602	68	73	110	97
RP11-1277A3.2	0.806544	1.92327	3.78738	0.000773693	0.00711023	-0.512617	74	79	134	126
RP11-1281K21.1	0.619427	1.22629	2.33754	0.027065	0.0996316	-3.38175	54	47	67	83
RP11-1281K21.3	0.797862	0.00938178	2.16327	0.0395295	0.130819	-3.64806	20	20	35	33
RP11-1415C14.4	1.6972	0.156939	4.52994	0.00010748	0.0016077	0.145728	13	20	43	62
RP11-255H23.2	0.597872	1.20651	2.16382	0.0394829	0.130739	-3.66241	54	46	84	64
RP11-274M17.1	0.69616	1.29954	2.71389	0.0114356	0.0536927	-2.72665	48	55	82	80
RP11-298J20.3	0.687391	0.743736	2.18145	0.0380227	0.127468	-3.61378	44	28	52	57
RP11-421L21.3	0.663015	0.964243	2.29685	0.029604	0.106466	-3.43934	33	51	61	66
RP11-428J1.5	0.647034	1.19595	2.32623	0.0277502	0.101608	-3.3991	58	41	79	69
RP11-436H11.1	0.598929	1.19719	2.08982	0.0461767	0.146009	-3.77725	57	43	87	61
RP11-46D6.1	1.17834	0.00275643	3.10963	0.0043813	0.0267605	-2.2421	15	20	43	35
RP11-493K19.3	0.732947	0.711635	2.36173	0.0256512	0.0959454	-3.33587	38	30	48	61
RP11-521B24.3	0.953477	1.35012	3.42972	0.00195434	0.0144046	-1.35066	65	37	82	101
RP11-552M11.8	0.962866	0.284537	2.78798	0.00959159	0.0470491	-2.69303	22	24	38	50
RP11-559N14.5	0.857134	0.840706	2.88231	0.00764742	0.0399121	-2.4556	39	32	60	64
RP11-562F9.1	0.707734	0.951352	2.47514	0.019881	0.079972	-3.14835	35	46	58	70
RP11-563E2.2	0.723377	0.919341	2.3049	0.0290853	0.10525	-3.42559	35	43	81	49
RP11-568J23.5	0.699283	0.598799	2.16203	0.0396346	0.130927	-3.64042	26	38	41	60
RP11-61L19.3	0.743698	0.349622	2.11769	0.0435451	0.140016	-3.7033	31	22	34	52
RP11-73M18.7	0.987776	0.438006	2.58397	0.0154925	0.066969	-3.00079	21	30	72	34
RP11-767C1.1	0.919652	1.44747	3.70189	0.000967409	0.0084624	-0.779103	56	50	89	105
RP11-782C8.5	0.626908	1.41732	2.53664	0.0172773	0.0721665	-3.04638	52	63	79	93
RP11-830F9.6	1.0963	0.291273	3.19052	0.00358104	0.0230132	-2.02976	21	23	45	47
RP11-876N24.4	0.946497	0.786149	3.04812	0.00510145	0.0299506	-2.169	39	28	53	71
RP11-977G19.11	0.829591	0.38547	2.477	0.0197973	0.0797506	-3.17139	23	29	40	50
RP11-98J23.2	1.14388	-0.054051	2.86836	0.00790944	0.0409316	-2.63232	24	12	36	37
RP3-465N24.5	0.758928	0.933573	2.65455	0.0131468	0.0594229	-2.84499	40	38	62	66
RP5-1050D4.5	0.957977	-0.0687685	2.45843	0.0206488	0.0820415	-3.24264	19	17	26	44
RP5-1061H20.4	0.609261	0.990336	2.10759	0.0444834	0.14221	-3.73547	39	47	51	78
RTN4R	1.42115	0.199444	3.79833	0.000751823	0.00694289	-1.04198	21	16	57	41
SAP30L	0.586334	4.31721	6.04228	1.88541e-06	6.53139e-05	5.06718	421	452	641	628
SDAD1P1	0.818508	0.343989	2.15216	0.0404762	0.132901	-3.65478	40	16	44	42
SEC24B-AS1	0.762532	0.348648	2.24264	0.0333221	0.115924	-3.52476	29	23	41	44
SEMA3A	0.624452	1.10022	2.29274	0.0298723	0.107011	-3.45012	44	48	61	77
SEMA4G	0.734143	2.69371	4.5108	0.000113145	0.00166209	1.23462	126	143	207	226
SIK1	0.634402	3.69956	5.41218	1.00529e-05	0.000250441	3.49553	281	279	398	442
SIX2	1.54181	-0.408632	3.62785	0.00117284	0.00979076	-1.57236	8	16	35	31
SLC26A10	0.836368	0.608622	2.42719	0.0221572	0.0865042	-3.23602	37	25	38	71
SLC2A12	0.724216	0.45057	2.16939	0.0390164	0.129707	-3.62926	33	24	44	46
SLC30A3	0.694761	1.33743	2.73548	0.0108666	0.0517183	-2.68657	55	51	78	88
SLC39A14	0.606542	6.25774	10.3561	6.59555e-11	1.48145e-08	15.0123	1514	1831	2290	2627
SMAD9	0.681563	1.20347	2.5861	0.0154162	0.066797	-2.95608	45	52	69	82
SMN1	0.70841	5.05885	3.4378	0.00191435	0.0141805	-1.72032	645	748	1655	751
SMO	0.733155	1.87708	3.36301	0.00231695	0.0163537	-1.42671	64	90	115	131
SNAI3-AS1	0.721179	1.96615	3.32845	0.00252951	0.01743	-1.49571	65	101	121	140
SNN	0.743433	2.90025	4.76679	5.68802e-05	0.000964095	1.86739	135	176	249	253
SOGA1	0.594774	5.80445	9.78662	2.22875e-10	4.19427e-08	13.825	1186	1258	1729	1839
SPATC1	0.775374	0.257262	2.15143	0.0405399	0.133025	-3.65707	25	23	49	33
SPNS2	0.607891	2.28816	3.20695	0.00343658	0.0223739	-1.75709	111	101	158	154
SPON1	0.790383	0.212339	2.22913	0.0343128	0.118483	-3.54875	27	20	37	41
SPR	0.642263	4.78685	7.67241	2.96238e-08	2.18276e-06	9.06114	544	645	887	906
SRRM3	0.782215	0.0410522	2.0851	0.0466358	0.146934	-3.75186	25	17	36	33
ST20	0.738629	1.4527	2.94093	0.0066338	0.0361716	-2.29794	51	62	100	84
SYT6	0.833562	3.33583	5.76037	3.97332e-06	0.000118093	4.33267	165	247	352	350
TBC1D16	0.587008	4.84106	7.3078	7.30222e-08	4.44064e-06	8.1845	613	644	855	971
TEF	0.752032	2.11907	3.81638	0.000717046	0.00671074	-0.425502	87	92	140	152
TEX22	0.849672	0.1792	2.16482	0.0393992	0.130605	-3.64029	17	29	26	58
TMEM170B	0.666181	3.77552	5.73844	4.21165e-06	0.000122959	4.31315	260	326	433	464
TMEM65	0.689038	3.44139	5.02815	2.81665e-05	0.000557962	2.53416	190	275	354	364
TMEM86A	0.634417	1.34961	2.52452	0.0177638	0.0736027	-3.06586	54	55	78	86
TMEM9B-AS1	0.641703	0.798717	2.16859	0.0390828	0.129794	-3.63459	34	40	55	57
TNFRSF8	0.629277	3.7324	5.45483	8.96904e-06	0.000230024	3.60252	278	296	400	459
TSPAN5	0.634732	3.55178	4.94546	3.51795e-05	0.000665637	2.32613	248	258	331	432
TTYH2	0.637071	1.76239	2.78162	0.00973832	0.0475511	-2.60368	74	71	120	100
TWIST1	1.01882	-0.251226	2.52823	0.0176136	0.0731982	-3.1671	17	14	25	37
U82695.10	0.676573	1.59431	2.85798	0.00810987	0.0417165	-2.4539	69	59	95	102
UBE2SP1	0.734492	0.637115	2.35141	0.0262459	0.0975448	-3.35355	30	34	45	59
VAV2	0.726591	3.13416	5.04222	2.7121e-05	0.000543435	2.55684	164	203	296	291
WDFY3-AS2	0.885565	-0.271866	2.22219	0.0348313	0.11962	-3.58583	14	18	25	33
WNT10B	0.633757	2.9099	4.13002	0.00031303	0.00361464	0.333203	168	156	231	254
WNT5B	1.2616	3.42656	9.07092	1.09231e-09	1.46264e-07	11.6935	205	170	402	461
YPEL2	0.596256	2.17773	3.06118	0.00493972	0.0292423	-2.06012	87	111	134	155
ZNF222	0.876918	-0.204489	2.20671	0.0360148	0.122597	-3.60151	20	14	31	29
ZNF32-AS2	0.756311	0.579735	2.38669	0.0242635	0.0922577	-3.3004	32	29	46	54
ZNF814	0.745176	2.43216	4.17427	0.000278263	0.0033064	0.418553	110	113	180	182
ZNF853	0.827084	3.07597	5.55669	6.83282e-06	0.000181591	3.79952	146	196	287	297

## Sheet: K562_limmavoom_IAA24hVSDMSO
Supplemental Table 6: RNA transcriptome analysis of AID-KMT2D K562 cells with 5-Ph-IAA treatment for 6 hours, 12 hours and 24 hours vs. without 5-Ph-IAA treatment grown in the expansion culture.
gene_name	logFC	AveExpr	t	P.Value	adj.P.Val	B	C13_D6_1	C13_D6_2	C13_I24_1	C13_I24_2
A1BG-AS1	-0.29266	0.855258	-0.832045	0.417642	0.593592	-5.37197	50	55	56	36
AAAS	-0.178509	6.60331	-2.52487	0.0225299	0.081972	-4.48366	2753	2794	2404	2606
AACS	0.288669	5.32963	3.70334	0.00193165	0.0146324	-1.84166	943	1010	1123	1317
AACSP1	0.262319	3.20081	1.73497	0.101983	0.23309	-4.99352	200	251	261	292
AADAT	0.00753123	1.49916	0.025767	0.979762	0.990113	-5.87316	96	60	64	91
AAED1	0.0893905	4.08692	0.799864	0.435517	0.60961	-6.36726	414	474	407	561
AAGAB	-0.0579944	6.2913	-0.834923	0.416067	0.592064	-6.90063	2006	2304	1764	2488
AAK1	-0.348556	2.25702	-1.75823	0.0978384	0.226339	-4.68798	142	147	103	129
AAMDC	-0.518031	0.924805	-1.59515	0.130258	0.274116	-4.59715	71	52	38	48
AAMP	-0.0780193	7.5812	-1.39242	0.182865	0.345361	-6.49791	5058	5511	4791	5432
AAR2	-0.12563	5.88125	-1.81848	0.0877795	0.209272	-5.59032	1582	1724	1430	1668
AARS	0.0943062	7.82187	1.92943	0.0716241	0.182347	-5.72673	5578	6201	5772	7082
AARS2	-0.092881	6.07037	-1.25463	0.227652	0.397816	-6.42359	1829	1892	1705	1863
AARSD1	-0.103145	2.59279	-0.583641	0.567608	0.719181	-6.04956	165	170	143	176
AASDH	0.103114	4.38901	0.915619	0.373474	0.554317	-6.35916	578	510	545	645
AASDHPPT	0.214874	6.8755	3.11028	0.00673982	0.0353293	-3.36579	2591	3299	3170	3783
AASS	0.594688	3.82425	4.7166	0.00023342	0.00334456	0.590096	312	309	396	566
AATF	-0.0332638	6.93492	-0.58688	0.565482	0.717654	-7.19436	3197	3453	3043	3598
AATK	-0.733352	0.194348	-1.85619	0.081958	0.20031	-4.14625	42	36	26	22
ABAT	-1.70792	4.11578	-14.0924	1.96862e-10	1.51693e-07	13.8021	817	859	256	270
ABC7-42389800N19.1	-0.514086	3.9336	-4.38795	0.000459614	0.0053012	-0.0983988	493	488	312	390
ABC7-43041300I9.1	-0.640464	1.82589	-2.74289	0.0144536	0.0601715	-2.94446	114	122	75	80
ABCA11P	-0.0341037	0.470328	-0.0947685	0.925677	0.961123	-5.58942	30	46	31	44
ABCA17P	-0.508567	0.427032	-1.39151	0.183135	0.345777	-4.75096	41	45	22	41
ABCA2	0.192726	5.46022	1.95497	0.0683054	0.176194	-5.27527	1097	1106	1301	1282
ABCA3	0.183116	6.97167	2.99731	0.00853475	0.0417999	-3.61054	3070	3254	3444	3890
ABCA5	0.915301	0.247009	2.38979	0.0295266	0.0991033	-3.39092	20	26	35	55
ABCA7	-0.791808	5.01102	-9.47877	5.80627e-08	1.00666e-05	8.68185	1099	1182	595	753
ABCA8	-0.0217933	-0.040647	-0.0426611	0.9665	0.983302	-5.47342	39	18	14	45
ABCB10	0.292419	6.51693	4.52845	0.000343616	0.00429365	-0.34083	2018	2445	2481	3098
ABCB10P1	-0.174807	0.560507	-0.454692	0.655446	0.786233	-5.52061	32	55	25	55
ABCB10P3	0.0428067	0.466661	0.122312	0.904177	0.949208	-5.58569	35	37	36	40
ABCB10P4	0.0362002	1.85701	0.157937	0.876485	0.932631	-5.97187	85	107	91	110
ABCB6	0.0512873	2.17935	0.248569	0.80686	0.888609	-6.05716	123	116	108	145
ABCB7	0.12647	5.00995	1.48525	0.156934	0.310726	-5.88039	790	871	786	1073
ABCB8	-0.486337	6.48598	-7.29217	1.81629e-06	0.000112913	5.01739	2677	3021	1966	2189
ABCB9	-0.839635	2.69284	-4.45359	0.000401135	0.00480578	0.228847	248	216	127	137
ABCC1	0.0420295	6.72174	0.73174	0.47492	0.644468	-7.06143	2643	2951	2654	3233
ABCC10	-0.237866	5.54584	-3.00497	0.00839952	0.0414187	-3.33098	1390	1336	1067	1295
ABCC4	0.0837021	6.88175	1.51155	0.150167	0.301957	-6.23635	2920	3243	2952	3731
ABCC5	-0.011704	6.87026	-0.198059	0.845496	0.91389	-7.3438	3155	3158	2853	3554
ABCD1	-0.61107	5.35344	-7.74147	8.52678e-07	7.08183e-05	5.94935	1285	1427	846	970
ABCD3	0.417216	5.09799	4.05964	0.000912213	0.00854892	-1.043	738	865	859	1351
ABCD4	-0.226109	4.75321	-2.15624	0.0466449	0.13704	-4.75253	773	786	681	688
ABCE1	0.286532	8.41615	6.29415	1.07363e-05	0.000381826	2.95797	7834	8812	9210	11554
ABCF1	0.101808	8.54637	2.24136	0.0395501	0.12197	-5.27595	9290	10111	9668	11607
ABCF2	0.182514	7.52337	3.46417	0.00320061	0.0209794	-2.72348	4311	4989	4816	5966
ABCF3	-0.198226	5.74785	-2.79157	0.013076	0.056374	-3.80071	1490	1600	1271	1483
ABCG2	-0.297777	3.39096	-2.18023	0.0445352	0.132811	-4.32601	310	315	226	294
ABHD10	0.0226075	4.23601	0.211551	0.835131	0.907282	-6.71792	459	549	452	595
ABHD11	0.259376	3.61465	2.04503	0.0576808	0.15688	-4.61959	298	303	327	409
ABHD12	-0.242604	5.14241	-2.90527	0.0103357	0.0478654	-3.4385	963	1100	831	952
ABHD13	0.0751898	3.97768	0.639549	0.531526	0.691064	-6.45108	406	421	368	526
ABHD14A	-0.0707386	2.07221	-0.321015	0.752358	0.853814	-6.00216	98	134	107	118
ABHD14B	0.0946513	5.48101	1.26683	0.223367	0.393459	-6.28104	1097	1225	1161	1374
ABHD15	-0.689781	3.18509	-4.54979	0.000328818	0.00417264	0.361306	278	343	182	211
ABHD16A	-0.623963	1.67989	-2.56865	0.0206223	0.0772111	-3.23048	98	115	64	77
ABHD16B	-0.982077	3.49126	-6.67274	5.3849e-06	0.000241711	4.29604	399	444	225	215
ABHD17A	-0.348105	6.77921	-4.67086	0.000256345	0.00352728	-0.0857855	3257	3385	2622	2715
ABHD17B	0.0571445	4.3589	0.571532	0.575589	0.726161	-6.60928	510	572	505	647
ABHD2	-0.169622	7.81164	-3.3253	0.00428969	0.0254918	-3.05011	6337	6468	5193	6457
ABHD3	0.114192	4.37139	1.09171	0.291144	0.471089	-6.17946	504	562	561	621
ABHD4	-0.0556929	3.66953	-0.443831	0.663115	0.79176	-6.46604	341	357	291	397
ABHD5	0.225072	5.2856	2.91586	0.0101111	0.0470227	-3.45074	917	1022	1045	1273
ABHD6	-0.134905	3.18146	-0.929208	0.366603	0.547893	-5.9787	238	273	209	267
ABHD8	-0.338267	3.4831	-2.30554	0.0348786	0.111612	-4.13092	307	365	277	270
ABI1	0.0279566	5.41457	0.374678	0.712825	0.829158	-6.99852	1073	1200	1038	1334
ABI2	-0.0982392	6.15305	-1.50061	0.152951	0.305989	-6.12059	1857	2101	1731	2047
ABL1	-0.160308	8.25266	-3.36558	0.00394055	0.0241731	-3.02095	8182	9160	7208	8642
ABL2	0.141451	6.41778	2.33973	0.0326056	0.106418	-4.79744	2081	2295	2229	2706
ABLIM1	-0.186942	4.66045	-2.04968	0.0571752	0.156137	-4.91109	684	767	577	727
ABO	-0.140622	4.16226	-1.26263	0.224835	0.394791	-5.92334	502	505	441	494
ABR	-0.213053	2.1316	-0.966451	0.348215	0.528602	-5.61567	140	114	103	119
ABRACL	-0.102403	4.19866	-0.893076	0.385066	0.564275	-6.32226	477	551	394	590
ABT1	-0.0642314	6.45614	-1.07751	0.297245	0.476949	-6.70027	2296	2534	2075	2654
ABTB1	-0.0235339	0.910633	-0.0734604	0.942351	0.970888	-5.70394	43	58	53	49
ABTB2	-0.105572	3.2385	-0.72828	0.476977	0.646226	-6.16177	248	276	236	263
AC000068.5	-0.820147	1.73137	-3.29836	0.00454012	0.0265143	-1.91262	118	120	52	87
AC000078.5	-0.298216	1.81119	-1.28569	0.216866	0.385731	-5.18889	96	112	81	92
AC000089.3	-0.0360095	1.02034	-0.118286	0.907315	0.951206	-5.72954	46	65	46	64
AC000120.7	0.105608	0.254734	0.23902	0.814128	0.893916	-5.51587	22	43	20	54
AC000123.4	-0.419779	0.890104	-1.31784	0.206135	0.372909	-4.92365	48	68	36	52
AC002056.3	-0.276582	0.257127	-0.745432	0.466832	0.637676	-5.29566	32	38	25	34
AC002116.7	-0.154694	-0.0395594	-0.339808	0.738426	0.845981	-5.42387	31	23	33	19
AC002310.12	-0.201467	0.929055	-0.659019	0.519266	0.682351	-5.50803	54	55	41	56
AC002467.7	-0.288843	1.44876	-1.00396	0.330356	0.51076	-5.38049	68	97	48	92
AC002472.1	-0.785914	-0.0652264	-1.89339	0.0765544	0.191455	-4.07354	37	30	17	22
AC002480.2	-0.317938	3.07164	-1.98193	0.0649533	0.170239	-4.56883	263	240	196	216
AC002539.1	0.18641	1.27341	0.63877	0.53202	0.691511	-5.61163	71	52	59	82
AC003104.1	0.392457	2.93242	2.34115	0.0325138	0.10626	-3.91414	152	209	210	272
AC003665.1	-0.102534	0.572975	-0.301727	0.766751	0.862517	-5.57693	42	40	34	44
AC004057.1	0.362496	5.03469	2.13986	0.048138	0.139681	-4.85208	685	858	1199	882
AC004074.3	-0.097138	2.39033	-0.50968	0.61724	0.75653	-6.02555	132	159	126	152
AC004158.2	-0.288872	0.685276	-0.866248	0.399171	0.576855	-5.30555	46	48	40	39
AC004166.6	-0.203083	0.124781	-0.529403	0.603802	0.747345	-5.38738	29	33	24	31
AC004257.3	-0.216069	0.942629	-0.65947	0.518984	0.68211	-5.51116	43	71	38	61
AC004381.6	-0.131706	5.58911	-1.71733	0.105229	0.23798	-5.6851	1227	1489	1136	1394
AC004447.2	-0.42262	3.60941	-2.67962	0.0164544	0.0658251	-3.47171	371	380	315	268
AC004453.8	-0.0371664	0.912954	-0.114279	0.91044	0.953272	-5.70093	46	57	36	69
AC004463.6	-0.739272	3.5072	-5.59525	4.03942e-05	0.000991623	2.3499	377	413	210	274
AC004471.9	-1.02913	0.763394	-2.94629	0.00949143	0.045038	-2.50782	76	55	31	33
AC004540.5	-0.698349	1.05361	-2.26377	0.0378562	0.117992	-3.64872	63	80	33	58
AC004797.1	0.3011	3.84182	2.50974	0.0232274	0.0838532	-3.85535	321	375	374	504
AC004840.9	-0.544384	2.08798	-2.42737	0.0273972	0.0941058	-3.55549	139	134	100	93
AC004893.11	-0.464559	1.9626	-2.03472	0.058816	0.159114	-4.18554	132	114	82	99
AC004951.6	-0.319224	0.134046	-0.828591	0.419537	0.595475	-5.21359	29	36	25	28
AC004967.7	-0.279746	2.5616	-1.56826	0.136404	0.282925	-5.04618	165	184	130	164
AC004980.7	-0.0419322	3.1467	-0.282884	0.780897	0.871713	-6.36116	241	242	206	274
AC004987.9	-0.994936	0.848401	-3.08405	0.00712034	0.0367681	-2.27373	72	64	31	38
AC005003.1	-1.20019	0.0828229	-2.84191	0.0117855	0.0525612	-2.70609	47	38	22	16
AC005076.5	-0.374771	1.05091	-1.16698	0.260333	0.436036	-5.12072	77	52	42	57
AC005083.1	-0.634074	1.73055	-2.55108	0.0213686	0.079162	-3.26917	120	102	67	78
AC005104.3	-0.0708452	0.597984	-0.205752	0.839582	0.910466	-5.60566	46	37	36	44
AC005154.6	-0.0789375	4.8534	-0.887791	0.387818	0.566811	-6.52064	800	796	692	853
AC005224.2	0.145827	0.118474	0.36584	0.719281	0.832479	-5.45043	27	28	22	42
AC005229.1	-0.157325	0.115629	-0.384286	0.705831	0.824411	-5.44365	36	26	20	37
AC005253.2	-0.187186	1.11766	-0.591709	0.562322	0.71528	-5.59685	57	65	65	48
AC005306.3	0.31673	0.263934	0.827412	0.420186	0.595908	-5.24051	24	33	38	35
AC005307.3	-0.232897	1.45868	-0.844214	0.411008	0.587759	-5.52041	82	76	74	65
AC005329.7	0.578091	0.415654	1.32119	0.20504	0.371752	-4.82542	29	30	24	77
AC005330.2	-1.42017	-0.439527	-2.91579	0.0101124	0.0470227	-2.65579	29	34	16	9
AC005546.2	-0.294305	0.176208	-0.770885	0.452021	0.623775	-5.26185	33	33	27	28
AC005618.6	-0.615552	0.140204	-1.4773	0.159028	0.314026	-4.60799	40	32	29	20
AC005682.5	0.466832	2.1103	2.2099	0.0420472	0.127416	-3.93272	99	98	118	161
AC005785.2	-0.560309	0.380591	-1.53539	0.144244	0.293653	-4.57696	37	47	29	29
AC005943.4	-0.354468	0.204959	-0.942875	0.359779	0.540868	-5.1418	34	35	25	30
AC005943.5	-0.28316	1.66344	-1.14443	0.269296	0.44636	-5.30247	87	99	78	79
AC006014.1	-0.0641728	-0.0256217	-0.156922	0.877271	0.933038	-5.46678	23	30	27	25
AC006116.20	0.136068	0.183284	0.338387	0.739476	0.846403	-5.47362	23	36	23	44
AC006126.4	-1.44147	1.58407	-5.51189	4.75161e-05	0.00110764	1.98731	122	142	48	51
AC006262.5	-1.53118	0.597325	-4.21391	0.000660416	0.00682871	-0.440295	56	83	23	25
AC006486.1	-0.59118	1.08277	-1.98509	0.0645705	0.169427	-4.08287	62	78	38	57
AC006538.1	-0.122768	2.01257	-0.549379	0.590339	0.737326	-5.88449	100	125	105	107
AC006547.13	-0.323865	3.14234	-2.01508	0.0610351	0.163144	-4.5348	245	282	221	213
AC006547.14	0.210735	0.135482	0.548204	0.591127	0.737778	-5.38054	28	26	28	36
AC006946.16	0.260702	1.48906	0.979882	0.341744	0.522371	-5.4135	72	66	66	104
AC006978.6	0.292082	2.96997	1.86185	0.081114	0.199278	-4.73083	190	190	209	267
[truncated: 15,077 more rows]

## Sheet: 24h_down
Supplemental Table 6: RNA transcriptome analysis of AID-KMT2D K562 cells with 5-Ph-IAA treatment for 6 hours, 12 hours and 24 hours vs. without 5-Ph-IAA treatment grown in the expansion culture.
[truncated: 704 more rows]

[truncated: 1 more sheets: 24h_up]
