# Supplementary material for: The H3K4 methyltransferase KMT2D is an essential cofactor for GATA1 at erythroid gene enhancers
Source: Research Square preprint supplement (doi:10.21203/rs.3.rs-7853319/v1), 2025-10-22
Supplement: Supplementary file 7 [file 8eaf9b4323066bb98e0d7978.xlsx]

## Sheet: human epigenetic CRISPR library
Supplemental Table 1: Analysis of CRISPR screen using single-guide (sg) RNAs targeting epigenetic modifiers.
Gene	ID	Target sequence (with PAM)	NGS count
ACTL6A	ACTL6A_1	TCCTACAGCTATTGGTATGGTGG	397
ACTL6A	ACTL6A_2	GGCGATAAAGGCAAACAAGGCGG	316
ACTL6A	ACTL6A_3	CTAATGCTCTGCGTGTTCCGAGG	284
ACTL6A	ACTL6A_4	TGTTCCGAGGGAGAATATGGAGG	394
ACTL6A	ACTL6A_5	CCATCCTGTTCTCATGTCAGAGG	341
ACTL6A	ACTL6A_6	CTAGTATTCCACTTGAGAAGAGG	212
ACTL6A	ACTL6A_7	ACTGGGCTGATTTTGGACAGTGG	290
ACTL6A	ACTL6A_8	TGGAATTGCAGTGGTATGAGTGG	409
ACTL6A	ACTL6A_9	ATCGTGGACTGGAATTGCAGTGG	432
ACTL6A	ACTL6A_10	GTTGAAGGACATAGCCATCGTGG	1
ACTL6B	ACTL6B_1	AGTGCCCGCTGCGCTGCTAGCGG	412
ACTL6B	ACTL6B_2	AGCGCAGCGGGCACTATGAGCGG	235
ACTL6B	ACTL6B_3	CGCAGCGGGCACTATGAGCGGGG	150
ACTL6B	ACTL6B_4	GCAGCGGGCACTATGAGCGGGGG	441
ACTL6B	ACTL6B_5	ATGAGCGGGGGCGTCTACGGCGG	343
ACTL6B	ACTL6B_6	AGCGGGGGCGTCTACGGCGGAGG	259
ACTL6B	ACTL6B_7	GTCTCCCCGCACAGATGAGGTGG	5
ACTL6B	ACTL6B_8	TCCCCGCACAGATGAGGTGGGGG	393
ACTL6B	ACTL6B_9	GCCCCCACCTCATCTGTGCGGGG	541
ACTL6B	ACTL6B_10	GCGCCCCCACCTCATCTGTGCGG	325
ACTR5	ACTR5_1	GGACGCGCGCTCCAAGATGGCGG	345
ACTR5	ACTR5_2	CTCCAGCACTGGGTCCGGTGCGG	409
ACTR5	ACTR5_3	CGCACCGGACCCAGTGCTGGAGG	389
ACTR5	ACTR5_4	GACCCGTTGTCCAGCACCAGCGG	548
ACTR5	ACTR5_5	ACCGCGCGGAACTGCAGGCGCGG	222
ACTR5	ACTR5_6	GAGCGCAGCATCCAGCGCAGTGG	314
ACTR5	ACTR5_7	GTCTCCTCACAGGTGAAGGGCGG	1
ACTR5	ACTR5_8	TACTCCGCCCTTCACCTGTGAGG	470
ACTR5	ACTR5_9	ATCATTTGCCGTGAATACAGTGG	389
ACTR5	ACTR5_10	TCGAGTTCTTTGGCTTATTGTGG	295
ACTR6	ACTR6_1	GTAAGTACTTTCTTTCTCCGAGG	0
ACTR6	ACTR6_2	GGATTACCTTTTGAAAAGGGAGG	214
ACTR6	ACTR6_3	CTCCCCTTGCAGGATAAATGTGG	322
ACTR6	ACTR6_4	TCCCACATTTATCCTGCAAGGGG	318
ACTR6	ACTR6_5	CCTTGCAGGATAAATGTGGGAGG	268
ACTR6	ACTR6_6	GAGTGGAAAATACAAATCTGGGG	192
ACTR6	ACTR6_7	AAGAACATTGTCTTGACAGGAGG	257
ACTR6	ACTR6_8	ATTACTTATGCCTGGGAAGGTGG	377
ACTR6	ACTR6_9	TGAGATGACGACCTTAGTGCTGG	533
ACTR6	ACTR6_10	ACGACCTTAGTGCTGGATAATGG	323
ACTR8	ACTR8_1	AGGAGCAGCGCGGCGTGAAGCGG	416
ACTR8	ACTR8_2	CAGCGACTCCGGCACCAGCGCGG	344
ACTR8	ACTR8_3	GGTGCCGGAGTCGCTGCAAGAGG	415
ACTR8	ACTR8_4	CGGAGTCGCTGCAAGAGGTGCGG	446
ACTR8	ACTR8_5	TGTCTTCGGGCAATGACGTGAGG	668
ACTR8	ACTR8_6	AGCCAACTGTCCTTGTATAGGGG	401
ACTR8	ACTR8_7	TCATTACTTTCTGGTTTCTGGGG	184
ACTR8	ACTR8_8	AGTTAATCGAACCTGTTCAGGGG	366
ACTR8	ACTR8_9	ATCACTGTTCGGGAAATAAGTGG	248
ACTR8	ACTR8_10	ATTCACTGGCCTATCAGAAGAGG	308
AEBP2	AEBP2_1	GTAGACAGCACAATTTCCAGTGG	3
AEBP2	AEBP2_2	ATACATGTAGATGGTCAGCGAGG	233
AEBP2	AEBP2_3	CATGTAGATGGTCAGCGAGGAGG	216
AEBP2	AEBP2_4	TGTAGATGGTCAGCGAGGAGGGG	279
AEBP2	AEBP2_5	GTTCTGCTGACTGAAGTGTGTGG	2
AEBP2	AEBP2_6	TGTGCATCGAAGAAATCATGTGG	350
AEBP2	AEBP2_7	TTCATAGTCTGCCTGATGTGTGG	355
AEBP2	AEBP2_8	CTAGAACAATGCCGCAGAAGAGG	348
AEBP2	AEBP2_9	TGCCGCAGAAGAGGTTGAAGAGG	478
AEBP2	AEBP2_10	AGGCATATGCTGACACACAGTGG	383
AFF1	AFF1_1	GGAAGCCCACCAAGAGAAAGAGG	273
AFF1	AFF1_2	TTGTAGGGCTCTCCAAAAAGGGG	228
AFF1	AFF1_3	ACTGGTGGTGGACACTAGTGTGG	243
AFF1	AFF1_4	GAGTGTGAATGGACTGGTGGTGG	344
AFF1	AFF1_5	CAGGAGTGTGAATGGACTGGTGG	363
AFF1	AFF1_6	CTAATGTTGCCAACAGAAAGTGG	220
AFF1	AFF1_7	GCTGCGCCATCTTTGGATTGTGG	486
AFF1	AFF1_8	AGTCTCCATGCCAAAAGCTGCGG	270
AFF1	AFF1_9	GTCAGGTGCTGGCTGTCCGGTGG	1
AFF1	AFF1_10	CCAGGATCGCCTTGGTCAGGAGG	391
AFF4	AFF4_1	TTCTTTGAACAGAGACATGGAGG	173
AFF4	AFF4_2	AGACTGAGAAGTGCTGGGTGCGG	251
AFF4	AFF4_3	ACCAGCGCAGGTAGCAGTAGTGG	385
AFF4	AFF4_4	GCACTAACAGTAGTGGTCAGAGG	278
AFF4	AFF4_5	CAGTTTGCATCAGGGTCCCGAGG	406
AFF4	AFF4_6	TCCCGTGTACCTTTTTCAAGTGG	316
AFF4	AFF4_7	GACTTTGACATCAATGAGGGTGG	278
AFF4	AFF4_8	CATGGGCCGCACATAGGCAGTGG	507
AFF4	AFF4_9	AATGTGTGACTTACATCCAGTGG	256
AFF4	AFF4_10	TTCTGGTGATGTGAGCTGTGTGG	499
AIRE	AIRE_1	CCACCCCATGGCGACGGACGCGG	287
AIRE	AIRE_2	CGGCGCTACGCCGGCTTCTGAGG	186
AIRE	AIRE_3	GCTGCACCGCACGGAGATCGCGG	399
AIRE	AIRE_4	GCACCGCACGGAGATCGCGGTGG	349
AIRE	AIRE_5	CGGCCACCGCGATCTCCGTGCGG	394
AIRE	AIRE_6	CACGGAGATCGCGGTGGCCGTGG	259
AIRE	AIRE_7	TCAGCCAGCGCGTGCAGCAGTGG	411
AIRE	AIRE_8	CGCGCTGGCTGACCACGACGTGG	454
AIRE	AIRE_9	TGACCACGACGTGGTCCCCGAGG	94
AIRE	AIRE_10	TGTCCTCGGGGACCACGTCGTGG	418
ANP32A	ANP32A_1	TTGGCAAATGCTCACATCAGAGG	712
ANP32A	ANP32A_2	GGGTCCGAATGACTTACCAGTGG	282
ANP32A	ANP32A_3	TCCTCTGTGCAATCGAAATGGGG	450
ANP32A	ANP32A_4	CTTCTGGAAAAGTAAGAAAGCGG	133
ANP32A	ANP32A_5	TCCCCATTTCGATTGCACAGAGG	308
ANP32A	ANP32A_6	TGTCTGTCCTTTCTCCTAGGAGG	431
ANP32A	ANP32A_7	ACTTTTCCAGAAGAAGAAAGGGG	164
ANP32A	ANP32A_8	TGGCAAATGCTCACATCAGAGGG	241
ANP32A	ANP32A_9	ACACGGTCGGGCCTTCTTTCAGG	224
ANP32A	ANP32A_10	CTTTGGTAAGTTTGCGATTGAGG	363
ARID1A	ARID1A_1	GATCCCCGCTGTCTCGTCCGCGG	228
ARID1A	ARID1A_2	CGGGTTGCCCAGGCTGCTGGCGG	305
ARID1A	ARID1A_3	TTCAGCTCCGAGGGCGGCGGCGG	479
ARID1A	ARID1A_4	TTCTTCAGCTCCGAGGGCGGCGG	268
ARID1A	ARID1A_5	GCTTTCTTCAGCTCCGAGGGCGG	306
ARID1A	ARID1A_6	CTCGGCTTTCTTCAGCTCCGAGG	233
ARID1A	ARID1A_7	AGAAAGCCGAGCAGCAGCAGCGG	231
ARID1A	ARID1A_8	AGCCGCCGGGCAGGAAAGCGAGG	276
ARID1A	ARID1A_9	GCCCTCGCTTTCCTGCCCGGCGG	420
ARID1A	ARID1A_10	GGAAAGCGAGGGCCCCGCCGTGG	378
ARID1B	ARID1B_1	GCCATGTTGAGTTCGTGACGGGG	519
ARID1B	ARID1B_2	ACTCAACATGGCCCATAACGCGG	269
ARID1B	ARID1B_3	GGCACCCACAGCGCCAAGAGCGG	400
ARID1B	ARID1B_4	ACCCACAGCGCCAAGAGCGGCGG	361
ARID1B	ARID1B_5	AGCCGCCGCTCTTGGCGCTGTGG	225
ARID1B	ARID1B_6	CGCCAAGAGCGGCGGCTCCGAGG	425
ARID1B	ARID1B_7	CAAGAGCGGCGGCTCCGAGGCGG	260
ARID1B	ARID1B_8	CTCCGAGGCGGCTCTCAAGGAGG	303
ARID1B	ARID1B_9	GAGGCGGCTCTCAAGGAGGGTGG	268
ARID1B	ARID1B_10	CGGGCTCGGCCATGGAGACGGGG	277
ARID2	ARID2_1	AAATAATGGCAAACTCGACGGGG	299
ARID2	ARID2_2	GGAAGGCGCCTCCGGACGAGCGG	402
ARID2	ARID2_3	TCGCTTTCCTGGACGAGCTGCGG	327
ARID2	ARID2_4	TCTGCTCTCACCCTCTGCTGTGG	451
ARID2	ARID2_5	AGAGGGTGAGAGCAGAACCGGGG	1
ARID2	ARID2_6	GAGGGTGAGAGCAGAACCGGGGG	336
ARID2	ARID2_7	TTTTTTTAAAAGGCGACCTGCGG	230
ARID2	ARID2_8	AAAAAAATCCCTGCGGTGGGTGG	110
ARID2	ARID2_9	ACCAGAGTCACTACTTTAGGCGG	378
ARID2	ARID2_10	GGCGGATTCGCGAAGGTGAGTGG	435
ARID3A	ARID3A_1	TGATGGAGACGCTGTTGCAGCGG	551
ARID3A	ARID3A_2	CGCTGTTGCAGCGGCAGCAGCGG	284
ARID3A	ARID3A_3	GGTGCAGCAGGGGGATCGGGGGG	350
ARID3A	ARID3A_4	GGGTGCAGCAGGGGGATCGGGGG	414
ARID3A	ARID3A_5	GGGGTGCAGCAGGGGGATCGGGG	454
ARID3A	ARID3A_6	GGGCTCTCTGTCCTCGTCGGGGG	446
ARID3A	ARID3A_7	CGGGCTCTCTGTCCTCGTCGGGG	281
ARID3A	ARID3A_8	CCGAGAGTGCCCGGATGCAGCGG	440
ARID3A	ARID3A_9	TGGCCGCACTGGCAGCCATGCGG	338
ARID3A	ARID3A_10	AGCCCGCATGGCTGCCAGTGCGG	360
ARID3B	ARID3B_1	TCGGTTGATGGGGGTCCCTGTGG	238
ARID3B	ARID3B_2	CACCCTCAGGACGCAGTGAGTGG	274
ARID3B	ARID3B_3	CAGATACTTCATGTACCTGGAGG	281
ARID3B	ARID3B_4	CTGCTGACCTTTCCTGAGAGTGG	283
ARID3B	ARID3B_5	TGGCACCACCTATGCAGGTGAGG	294
ARID3B	ARID3B_6	CAGGGCCTCACCTGCATAGGTGG	276
ARID3B	ARID3B_7	GGTGAGGCCCTGGAGCTCTGGGG	321
ARID3B	ARID3B_8	AAACAGCACACCTTGGTGGGTGG	246
ARID3B	ARID3B_9	GGGCAAACAGCACACCTTGGTGG	394
ARID3B	ARID3B_10	CTGCGTCCTGAGGGTGAAGGCGG	382
ARID3C	ARID3C_1	GCGCCTGGAAGCTGTCATGGAGG	333
ARID3C	ARID3C_2	AGCTCGGCTGGCCCAGGGGGTGG	405
ARID3C	ARID3C_3	GTCCGGTGGTCAGGCAGGGGAGG	41
ARID3C	ARID3C_4	AGGGTCCGGTGGTCAGGCAGGGG	399
ARID3C	ARID3C_5	CAGGGGCCTGTAGGGTCCGGTGG	260
ARID3C	ARID3C_6	GACCCTACAGGCCCCTGAGGGGG	247
ARID3C	ARID3C_7	ATTCCCCAAGGCCCCCTCAGGGG	450
ARID3C	ARID3C_8	CTGAAGAAGATGAGGAGAAGCGG	280
ARID3C	ARID3C_9	GCTGGCTAGAAGGCGAGCTGGGG	237
ARID3C	ARID3C_10	TCGTGGGGATGGAGTCCAGGGGG	322
ARID4A	ARID4A_1	TTTATGTTCCTTTCACCAGGCGG	261
ARID4A	ARID4A_2	GATGTCAGTGCCAAGTACCGAGG	0
ARID4A	ARID4A_3	GTACCGAGGTGCCTTCTGTGAGG	7
ARID4A	ARID4A_4	GTCATCTTGTACCAATTGTGTGG	4
ARID4A	ARID4A_5	AGATGCTAGTTGGTATACCGTGG	1
ARID4A	ARID4A_6	GAGACATTTTGCAGAGAGTGAGG	419
ARID4A	ARID4A_7	ATTGCAAAGAAGACGAACAGAGG	306
ARID4A	ARID4A_8	TCTTTATAGCCCAAAACAGGTGG	148
ARID4A	ARID4A_9	CTCCTTCGTCCCTAGTAGAGGGG	377
ARID4A	ARID4A_10	TTCTCCTTCGTCCCTAGTAGAGG	547
ARID4B	ARID4B_1	CATGAAGGTAAGATTGCCTGCGG	379
ARID4B	ARID4B_2	TGAGCCTCCCTATTTGACAGTGG	535
ARID4B	ARID4B_3	GTGCCCACTGTCAAATAGGGAGG	33
ARID4B	ARID4B_4	GATGTGAGTGCTAAATACAGAGG	362
ARID4B	ARID4B_5	ACTTTAGGTAGGAGCTATTGTGG	212
ARID4B	ARID4B_6	TCATCAAAAACTATGAGAGGGGG	135
ARID4B	ARID4B_7	GTCATCAAAAACTATGAGAGGGG	12
ARID4B	ARID4B_8	CCGTCATCAAAAACTATGAGAGG	93
ARID4B	ARID4B_9	AAATGCTCAGGGTTGGTGAGTGG	478
ARID4B	ARID4B_10	ATCCTCCAGTGATGAAGATGAGG	363
ARID5A	ARID5A_1	CATGGCCCGGAGAGGTCCCGCGG	286
ARID5A	ARID5A_2	CGCTTACCCATGGCCCGGAGAGG	361
ARID5A	ARID5A_3	CTCTCCGGGCCATGGGTAAGCGG	214
ARID5A	ARID5A_4	GCCATGGGTAAGCGGCTCTGCGG	264
ARID5A	ARID5A_5	GGGTAAGCGGCTCTGCGGCGCGG	306
ARID5A	ARID5A_6	CTTCCTGTTCCCTTTGACAGGGG	298
ARID5A	ARID5A_7	GTCTAGGGCGTCACCCTCCGTGG	6
ARID5A	ARID5A_8	GCAGGTTTGGGGGATGCAGGTGG	378
ARID5A	ARID5A_9	CCAGAACCCCATCTCGCTGGAGG	279
ARID5A	ARID5A_10	AACTCACCTCCAGCGAGATGGGG	304
ARID5B	ARID5B_1	GGGCATGGTTTCTTTTTGCGTGG	299
ARID5B	ARID5B_2	CCTTTTCCAGGTGAAATGTGAGG	153
ARID5B	ARID5B_3	GTCCAAAGGTTAACTGTTAGAGG	1
ARID5B	ARID5B_4	CAAGCTGCTCAAAAACTGGGAGG	184
ARID5B	ARID5B_5	AGATAACAGCCCGCCGTCAGTGG	393
ARID5B	ARID5B_6	AAATATGTTTCCACTGACGGCGG	320
ARID5B	ARID5B_7	ATAATGTCTGCGGGTACAAGTGG	276
ARID5B	ARID5B_8	CTTACCTTTCATAATGTCTGCGG	201
ARID5B	ARID5B_9	CGAGGTTTGATTGGAGGCAGGGG	378
ARID5B	ARID5B_10	TGTTTCCGAGGTTTGATTGGAGG	365
ASH1L	ASH1L_1	GACAGAGCATTACTTAATGGAGG	366
ASH1L	ASH1L_2	GAAGTTAGGACTTGGCACTGTGG	342
ASH1L	ASH1L_3	GGGTTCTACTGTTGGCCTAGTGG	281
ASH1L	ASH1L_4	AGCCTTAAGCGGTTCCTGAGTGG	382
ASH1L	ASH1L_5	GTACTACAAGAAGCCTTAAGCGG	0
ASH1L	ASH1L_6	AGGCTGCTTTTCATGCTTTGAGG	348
ASH1L	ASH1L_7	GGAGAAGTGCAATATACAGGAGG	188
ASH1L	ASH1L_8	TGCACTGAATGGGGATTTAGCGG	309
ASH1L	ASH1L_9	GAAAAGGAAGAAAACCTCGGTGG	185
ASH1L	ASH1L_10	GCCACCACTTTAGTCCACCGAGG	0
ASH2L	ASH2L_1	TGCAACGTCTGCCATCACAGTGG	371
ASH2L	ASH2L_2	TCTTACTTGCTTGCTTCCGGAGG	451
ASH2L	ASH2L_3	GTTCTCCAAAGATAAGGTAGAGG	1
ASH2L	ASH2L_4	CTCCAAAGATAAGGTAGAGGTGG	159
ASH2L	ASH2L_5	AATCTGCCTTCTCTTCAAAGGGG	289
ASH2L	ASH2L_6	ATCTGCCTTCTCTTCAAAGGGGG	460
ASH2L	ASH2L_7	GGAATTGCAGCAGGAAGCAGCGG	339
ASH2L	ASH2L_8	AAGCGCAAACAGCAGGATGGAGG	340
ASH2L	ASH2L_9	CCACCAAGAAGGCCCGGAGGTGG	264
ASH2L	ASH2L_10	ACCAAGAAGGCCCGGAGGTGGGG	368
ATAD1	ATAD1_1	ACCTTTACCATACCTTTTGGAGG	202
ATAD1	ATAD1_2	CTCTATGGGCCTCCAGGCTGTGG	363
ATAD1	ATAD1_3	CATATCAACCAGCCTGTAGGTGG	261
ATAD1	ATAD1_4	AACGTTTTACCACAGCCTGGAGG	234
ATAD1	ATAD1_5	ATAGCCGAGTCAAGGTCCTGAGG	248
ATAD1	ATAD1_6	CATATTCTCTAACACAGAGGAGG	209
ATAD1	ATAD1_7	CCGACTCAAAGGACGAGAAAAGG	231
ATAD1	ATAD1_8	TGTTGACCTTAACTTTTGCCAGG	346
ATAD1	ATAD1_9	CTATATCACTCCAAGTAACCTGG	229
ATAD1	ATAD1_10	GTTACTTGGAGTGATATAGCAGG	0
ATAD2	ATAD2_1	TGTGCAGCTCCAAGCTGCTGCGG	175
ATAD2	ATAD2_2	GGAGCTGCACAACCACTCCGCGG	303
ATAD2	ATAD2_3	GTCCAAGGAGCCCGTGGCCGAGG	0
ATAD2	ATAD2_4	GGACAGGTCCAAGGAGCCCGTGG	237
ATAD2	ATAD2_5	GGCCGATGTGCTCCAGACTGAGG	297
ATAD2	ATAD2_6	GTCTGGAGCACATCGGCCGGAGG	2
ATAD2	ATAD2_7	TGGAGCACATCGGCCGGAGGCGG	728
ATAD2	ATAD2_8	CGCGGCGCAGAAGAAACCCGCGG	252
ATAD2	ATAD2_9	CGCTTTGGCTGTGGTCGCCGCGG	382
ATAD2	ATAD2_10	CGCGGCGACCACAGCCAAAGCGG	293
ATAD3A	ATAD3A_1	GAAGCGGCCGGCGACAAGCGTGG	372
ATAD3A	ATAD3A_2	TGTCGCCGGCCGCTTCATCGAGG	514
ATAD3A	ATAD3A_3	GGATGTTCCTGTACAGGCTGCGG	327
ATAD3A	ATAD3A_4	AGTGGACCATCTCATTGATGCGG	318
ATAD3A	ATAD3A_5	AGGACCAGCATGAACCTGCGGGG	332
ATAD3A	ATAD3A_6	AAGGCGGAAGGGCCTGGGCGTGG	385
ATAD3A	ATAD3A_7	GGCGACAAGCGTGGCATTCTTGG	549
ATAD3A	ATAD3A_8	AAGAATGCCACGCTTGTCGCCGG	467
ATAD3A	ATAD3A_9	GAACCTGCGGGGCGGGGATGAGG	451
ATAD3A	ATAD3A_10	GAACTGCTCTGGTTGGTTGCTGG	219
ATAD3B	ATAD3B_1	GCGTAACCTGCGGGCGCATGTGG	316
ATAD3B	ATAD3B_2	GCCCGCAGGTTACGCCAAGGAGG	307
ATAD3B	ATAD3B_3	GGCCTCCTTGGCGTAACCTGCGG	341
ATAD3B	ATAD3B_4	TGTTGCTGTGTTGGCCCATGTGG	410
ATAD3B	ATAD3B_5	CTTCGACCTGCCGCAGCAGGAGG	247
ATAD3B	ATAD3B_6	CGCCTTGGACTCCGGATAGGGGG	357
ATAD3B	ATAD3B_7	TCGCCTTGGACTCCGGATAGGGG	361
ATAD3B	ATAD3B_8	TGGCCAGGCTCCATGAGGTGAGG	267
ATAD3B	ATAD3B_9	GAATCTGTAGGACAGGGATGGGG	347
ATAD3B	ATAD3B_10	AGTGGACCATCACGTCAATGCGG	336
ATAD3C	ATAD3C_1	AGAGATCGCTCGGCTGACAGAGG	451
ATAD3C	ATAD3C_2	ATCAGCATGAATCTGCGGGGCGG	319
ATAD3C	ATAD3C_3	AGGATCAGCATGAATCTGCGGGG	294
ATAD3C	ATAD3C_4	TGGCCCAGTCGAACTGCTCGGGG	514
ATAD3C	ATAD3C_5	GGCCTGCAGATGCAGGGACACGG	371
ATAD3C	ATAD3C_6	GCATCTGCAGGCCATGTCAAAGG	406
ATAD3C	ATAD3C_7	CAATGAGGATTTACGGAAGCAGG	271
ATAD3C	ATAD3C_8	TGAGGATTTACGGAAGCAGGAGG	391
ATAD3C	ATAD3C_9	GGTCTGATGGTGCTTCTGCACGG	350
ATAD3C	ATAD3C_10	GAAGCACCATCAGACCTTCTTGG	365
ATAD5	ATAD5_1	CCGGGAAGCGGGGAGTATGGTGG	253
ATAD5	ATAD5_2	GGGAAGCGGGGAGTATGGTGGGG	351
ATAD5	ATAD5_3	TCGCAGTCCTTCACGGGAGGCGG	493
ATAD5	ATAD5_4	ATCTCGCAGTCCTTCACGGGAGG	497
ATAD5	ATAD5_5	CGTGAAGGACTGCGAGATTGAGG	426
ATAD5	ATAD5_6	AGGACTGCGAGATTGAGGTGAGG	344
ATAD5	ATAD5_7	ATTGAGGTGAGGTTGAGTCGAGG	460
ATAD5	ATAD5_8	CTGTCTCTAGTCTTCCCTAGTGG	332
ATAD5	ATAD5_9	TGAAAGCTTACCCTTGGCAGAGG	453
ATAD5	ATAD5_10	GTCGACGAAATAGTCAAAAGTGG	0
ATRX	ATRX_1	ACATGACCGCTGAGCCCATGAGG	247
ATRX	ATRX_2	GTTTTACCTCATGGGCTCAGCGG	0
ATRX	ATRX_3	TGATTCATTGCAAGTCGTGGAGG	510
ATRX	ATRX_4	CAGGATCGTCACGATCAAAGAGG	295
ATRX	ATRX_5	ATTGTGAGCTGCACTGCTTGTGG	446
ATRX	ATRX_6	AAAACATTTCAGGTGGTGTGCGG	311
ATRX	ATRX_7	TTCAGGTGGTGTGCGGAAGGTGG	476
ATRX	ATRX_8	CTCTTTGGGCACAATTAGTGCGG	156
ATRX	ATRX_9	ACTGGAGTTCATGTTGGCTGTGG	274
ATRX	ATRX_10	GCATCAGAATGTTCCAACAGAGG	250
ATXN7	ATXN7_1	GTGGGAGGAACGGCCAAAGGCGG	1
ATXN7	ATXN7_2	TCTCTGTCCAAAAGCAAAGGAGG	184
ATXN7	ATXN7_3	AGCAAAGGAGGCAGTGCAAGTGG	364
ATXN7	ATXN7_4	GGAAGCAACCGTTCTTCCAGTGG	190
ATXN7	ATXN7_5	AGCAACCGTTCTTCCAGTGGAGG	443
ATXN7	ATXN7_6	CAACAACTTGGAACTTGATGAGG	239
ATXN7	ATXN7_7	CATACTCACATTCTACCATGGGG	380
ATXN7	ATXN7_8	AGAATGTGAGTATGGCCAAGAGG	438
ATXN7	ATXN7_9	CATGACACCCTCTGTGAAAGTGG	321
ATXN7	ATXN7_10	TGGCACACTACTGAAATCTGCGG	260
ATXN7L3	ATXN7L3_1	ATAACAGCAAACTAGAGGTGAGG	175
ATXN7L3	ATXN7L3_2	CATCGCTCAGGAGATATACGCGG	223
ATXN7L3	ATXN7L3_3	GATATACGCGGACCTGGTCGAGG	512
ATXN7L3	ATXN7L3_4	ACGATCTCTGGGGACAGGAGAGG	310
ATXN7L3	ATXN7L3_5	CGGCTGGTCCACGATCTCTGGGG	422
ATXN7L3	ATXN7L3_6	TTGGACAGGTTTTCAACCAGTGG	254
ATXN7L3	ATXN7L3_7	CAATGCTGCGACTGCAATTGGGG	381
ATXN7L3	ATXN7L3_8	CGAATCGCCAACCGCCGGTGAGG	268
ATXN7L3	ATXN7L3_9	AGCTCTGGTTCCCTCACCGGCGG	253
ATXN7L3	ATXN7L3_10	TTGGCAATCCTGCCAAGGGGAGG	260
BAZ1A	BAZ1A_1	AACGGCTTTCGGTGTAGCAGCGG	341
BAZ1A	BAZ1A_2	TGTGAGACAGAAGCCGCCCGCGG	283
BAZ1A	BAZ1A_3	AGAAGCCGCCCGCGGACCTGCGG	491
BAZ1A	BAZ1A_4	CCGGCTCTTACTCGTAGTGGCGG	304
BAZ1A	BAZ1A_5	GGCCCGGCTCTTACTCGTAGTGG	282
BAZ1A	BAZ1A_6	AGTAAGAGCCGGGCCGTGTGCGG	383
BAZ1A	BAZ1A_7	TTCTGTGCAACAGCCTTGTGTGG	334
BAZ1A	BAZ1A_8	CATTTTGATGTGATGGAGGGAGG	453
BAZ1A	BAZ1A_9	GTGTTTTCTCCGGCTACAGGAGG	1
BAZ1A	BAZ1A_10	AGTCCTGCTAACAGACGAAGAGG	268
BAZ1B	BAZ1B_1	AAGGGCTTGCGGCCCAGGAGCGG	173
BAZ1B	BAZ1B_2	TCACCAGCGGGAAGGGCTTGCGG	455
BAZ1B	BAZ1B_3	CCGGGCAACGGCTTCACCAGCGG	303
BAZ1B	BAZ1B_4	GGTGAAGCCGTTGCCCGGAGAGG	302
BAZ1B	BAZ1B_5	CACCATCCCGCACACTCAGGAGG	376
BAZ1B	BAZ1B_6	CGGAAGGCCTCCTGAGTGTGCGG	297
BAZ1B	BAZ1B_7	GAAAAGGATACTCCCGGGTGCGG	251
BAZ1B	BAZ1B_8	AGTATCCTTTTCCAGCCGCGCGG	275
BAZ1B	BAZ1B_9	GCTCACTGTACCTTTCCAAGCGG	271
BAZ1B	BAZ1B_10	GATCATGACCAAATATGCTGTGG	347
BAZ2A	BAZ2A_1	GCCTGACATGGGTGAGTATGGGG	571
BAZ2A	BAZ2A_2	CTCCCCTCCTGCAGAAATGGAGG	340
BAZ2A	BAZ2A_3	TGCCTCCATTTCTGCAGGAGGGG	346
BAZ2A	BAZ2A_4	AGGAGAGGGTTTCAGTCCTGAGG	145
BAZ2A	BAZ2A_5	ACCCTCTCCTTCCTCAGGGGAGG	304
BAZ2A	BAZ2A_6	TGGGAGACCCGTTAGTGTAGAGG	216
BAZ2A	BAZ2A_7	ACTCACTTTTCCCTTGCTGGGGG	331
BAZ2A	BAZ2A_8	CACTCACTTTTCCCTTGCTGGGG	248
BAZ2A	BAZ2A_9	TTCTCTGCCAGGTTTGAATGGGG	333
BAZ2A	BAZ2A_10	ACACCTCCATCACCCCAGCGTGG	368
BAZ2B	BAZ2B_1	TGTAGTAGAGGAGGCTGCTGAGG	538
BAZ2B	BAZ2B_2	TGAAGTTGGTGTAGTAGAGGAGG	393
BAZ2B	BAZ2B_3	AGATGAAGTTGGTGTAGTAGAGG	353
BAZ2B	BAZ2B_4	TTCATCTTCGACACCTTCTGTGG	443
BAZ2B	BAZ2B_5	GCTTCAGTAGTTTCAAAAGGTGG	184
BAZ2B	BAZ2B_6	GCTAAGTGAAGCAACTCCAGTGG	240
BAZ2B	BAZ2B_7	AGCTCTACAATCAACCCATGTGG	186
BAZ2B	BAZ2B_8	TTCTGAATAAATGTCCTGGGAGG	268
BAZ2B	BAZ2B_9	TGGGAAGGCACTCGACACTGTGG	552
BAZ2B	BAZ2B_10	TCAGGGCATTCAGAATTTGGTGG	334
BCOR	BCOR_1	GTGAACGTTCCCATACAGGGGGG	0
BCOR	BCOR_2	TGTGAACGTTCCCATACAGGGGG	261
BCOR	BCOR_3	CTGTGAACGTTCCCATACAGGGG	419
BCOR	BCOR_4	ACAGCTGGATGAACAGCGAGAGG	251
BCOR	BCOR_5	AGCGAGAGGGTCCGCATGTGTGG	507
BCOR	BCOR_6	CGAGAGGGTCCGCATGTGTGGGG	500
BCOR	BCOR_7	CTTCGCTCGCCCCACACATGCGG	461
BCOR	BCOR_8	GCCTGATCCGGGAAGGGCTGCGG	256
BCOR	BCOR_9	ATCGTCTATTCTAGCTTGTGTGG	170
BCOR	BCOR_10	GGGCTCAGAGAAAGGTCGGGAGG	271
BCORL1	BCORL1_1	TCTACAGCACCGCTCTACAGCGG	423
BCORL1	BCORL1_2	TTGTGCACGCCGCTGTAGAGCGG	453
BCORL1	BCORL1_3	TCTGACCGGATTCGCATGTGTGG	590
BCORL1	BCORL1_4	TCGCATGTGTGGCATCAACGAGG	204
BCORL1	BCORL1_5	TGTGTGGCATCAACGAGGAGAGG	481
BCORL1	BCORL1_6	GGCATCAACGAGGAGAGGTGAGG	327
BCORL1	BCORL1_7	ATCAACGAGGAGAGGTGAGGAGG	220
BCORL1	BCORL1_8	AAGAGCACCTCTTTCTGATGAGG	462
BCORL1	BCORL1_9	GTTGACTCCTCATCAGAAAGAGG	3
BCORL1	BCORL1_10	AGCAGTTTTTCCAAGGTAAGAGG	306
BMI1	BMI1_1	GCTGATGGTAAACCTTTTAGGGG	250
BMI1	BMI1_2	GATGGTAAACCTTTTAGGGGAGG	203
BMI1	BMI1_3	CTCTAATGAAGATAGAGGAGAGG	177
BMI1	BMI1_4	AAGGCCAACAGCCCAGCAGGAGG	263
BMI1	BMI1_5	GGGGCTAGGCAAACAAGAAGAGG	302
BMI1	BMI1_6	GGAACCAGCAACAGCCCCAGCGG	190
BMI1	BMI1_7	AAGATTGGTGGTTACCGCTGGGG	403
BMI1	BMI1_8	CACCTGATGTGTGTGCTTTGTGG	409
BMI1	BMI1_9	CTGATGTGTGTGCTTTGTGGAGG	346
BMI1	BMI1_10	CTCTTCATTTCATCTGAATGGGG	263
BPTF	BPTF_1	AGAGGAGGACATGGTCTCCGAGG	440
BPTF	BPTF_2	GGAGGACATGGTCTCCGAGGAGG	228
BPTF	BPTF_3	GGATTCTGAGGACGACGAGGAGG	402
BPTF	BPTF_4	TCTTCCAATATAGGAGAACGAGG	91
BPTF	BPTF_5	GACTTGGGAAATTCAAGGGGCGG	150
BPTF	BPTF_6	AGGCACCATTAAATCCTCAGAGG	361
BPTF	BPTF_7	GAATGTCATTGCCATTTACGAGG	204
BPTF	BPTF_8	TTGCCATTTACGAGGTACTGCGG	384
BPTF	BPTF_9	ATTTCATAGATGGGATGACGTGG	271
BPTF	BPTF_10	AGATGGGATGACGTGGCCAGAGG	391
BRD1	BRD1_1	AGGAAAGGACGATGTCATCGAGG	268
BRD1	BRD1_2	GTCATCGAGGCTCTGCAGCGAGG	2
BRD1	BRD1_3	GGTCAGCGTTTCTCGCGTAGGGG	499
BRD1	BRD1_4	TCTTCCAATATGATCTCCAGGGG	403
BRD1	BRD1_5	CACTCATCTCTTGAGCAGTGAGG	261
BRD1	BRD1_6	GCAACAAGGAAAACAGCGAGCGG	403
BRD1	BRD1_7	TGCGCACCTTGGGCTCCGGGAGG	464
BRD1	BRD1_8	GGAGCCCAAGGTGCGCATCGTGG	496
BRD1	BRD1_9	CACAGGAGGCCTCCTGGGGGCGG	168
BRD1	BRD1_10	ATGAACTTGTAGTACACAGGAGG	288
BRD2	BRD2_1	AGCTAGAGCTGGAAGCGCTAAGG	226
BRD2	BRD2_2	GTGGGGAATGTTGAAGACAGTGG	5
BRD2	BRD2_3	TTGAGTTTGTGCCTCTTTGTAGG	292
BRD2	BRD2_4	CTCAAATACATCCTACAAAGAGG	170
BRD2	BRD2_5	GCTGGAATCTGAGCTAGAGCTGG	387
BRD2	BRD2_6	GGAATGTTGAAGACAGTGGTAGG	256
BRD2	BRD2_7	TCTCAGGTGGAGGAGTATAGAGG	63
BRD2	BRD2_8	AAGACAGTGGTAGGTATCTCAGG	259
BRD2	BRD2_9	CTCAGGTGGAGGAGTATAGAGGG	193
BRD2	BRD2_10	TCCGGCTTTGGACCTTCTGGAGG	462
BRD3	BRD3_1	GAAAGTGAGTGAGCTGCCGGAGG	311
BRD3	BRD3_2	GGGGGCGACTGTCGTGGCGGTGG	329
BRD3	BRD3_3	TGTGAACCCACCCCCCCCGGAGG	323
BRD3	BRD3_4	GGGTTGGAGACCTCCGGGGGGGG	407
BRD3	BRD3_5	GGGGTTGGAGACCTCCGGGGGGG	90
BRD3	BRD3_6	TGGGGTTGGAGACCTCCGGGGGG	207
BRD3	BRD3_7	CTGGGGTTGGAGACCTCCGGGGG	289
BRD3	BRD3_8	GCTGGGGTTGGAGACCTCCGGGG	200
BRD3	BRD3_9	TCTTGCGGCCGGGCTTGCTGGGG	492
BRD3	BRD3_10	ACTGCAGCTGGTTGGTCTTGCGG	439
BRD4	BRD4_1	TGGGATCACTAGCATGTCTGCGG	511
BRD4	BRD4_2	ACTAGCATGTCTGCGGAGAGCGG	318
BRD4	BRD4_3	TGAGAAATCTGCCAGTAATGGGG	214
BRD4	BRD4_4	GAGAAATCTGCCAGTAATGGGGG	300
BRD4	BRD4_5	TTGGAGGTCTCTGGGGGCGGGGG	389
BRD4	BRD4_6	TTAGGGTTGGAGGTCTCTGGGGG	336
BRD4	BRD4_7	CTTGGGCTTGTTAGGGTTGGAGG	472
BRD4	BRD4_8	ACTGCAATACCTGCTCAGAGTGG	310
BRD4	BRD4_9	GAACCTCCCTGTGAGTAGTGTGG	374
BRD4	BRD4_10	TGCCCACACTACTCACAGGGAGG	428
BRD7	BRD7_1	CAAACACCTCTACGAGGGTGAGG	214
BRD7	BRD7_2	ACACCTCTACGAGGGTGAGGAGG	192
BRD7	BRD7_3	CCCCCTCCTCACCCTCGTAGAGG	428
BRD7	BRD7_4	GAACAAAGTCACTCCAGGTGAGG	376
BRD7	BRD7_5	CTGGAGTCCAAACGCCCTGGTGG	359
BRD7	BRD7_6	CTGAAGGTAAGTGTCTCCAGAGG	461
BRD7	BRD7_7	GGAATATTTCAGCTTCTGTGTGG	206
BRD7	BRD7_8	ACCTCTACGAGGGTGAGGAGGGG	212
BRD7	BRD7_9	GAGAAGAGTTAAGGTACAAGTGG	253
BRD7	BRD7_10	CTCCCTTTGTTCCATTTAGGAGG	345
BRD8	BRD8_1	GGATGGACCATGGCTCTGTGGGG	397
BRD8	BRD8_2	TCGGATGGACCATGGCTCTGTGG	413
BRD8	BRD8_3	GCATCTTCTGTCATGAGAAGTGG	322
BRD8	BRD8_4	GAGAGAACCAGTCTGGAGGGCGG	225
BRD8	BRD8_5	TTTTGAGAGAACCAGTCTGGAGG	373
BRD8	BRD8_6	TTTCACCTCGTTTCCGTCTGTGG	331
BRD8	BRD8_7	ACGAGGTGAAAAGGGAGAAGTGG	264
BRD8	BRD8_8	CCGTCTATAGGAAGAAAGAGAGG	169
BRD8	BRD8_9	TTTGCAATGACATTGCAACGTGG	137
BRD8	BRD8_10	AAGAGGAGGCTGAAGTAAAGAGG	211
BRD9	BRD9_1	CATCATAGTAACTGGAGTCGTGG	275
BRD9	BRD9_2	GGTCAGACCATGAGCGAGAGAGG	353
BRD9	BRD9_3	GGAGAAGCATCTGGACGATGAGG	353
BRD9	BRD9_4	GAAAGGTAAAGGAGCAGCGGCGG	233
BRD9	BRD9_5	AGGTAAAGGAGCAGCGGCGGTGG	487
BRD9	BRD9_6	CCGCTTCTTCTCTTCCTGGGCGG	312
BRD9	BRD9_7	AGAAGAAGCGGAAGCGAGAGAGG	245
BRD9	BRD9_8	GAGGGAGCACTGTGACACGGAGG	409
BRD9	BRD9_9	GCACTGTGACACGGAGGGAGAGG	268
BRD9	BRD9_10	CGGACTGGCCGATCTGGGGGCGG	276
BRDT	BRDT_1	GCCACAAGAAGAGCAAGTTGTGG	410
BRDT	BRDT_2	ATCTATTTCTCCCTTGAACGTGG	284
BRDT	BRDT_3	CAACTCCAGTTCACAAACTGCGG	236
BRDT	BRDT_4	GTCACAACTTCGTGATCTGGAGG	3
BRDT	BRDT_5	ATTAGTGTTCTCTCTACCAGTGG	261
BRDT	BRDT_6	AGAAGAGTTCCCTTCAGAGGAGG	253
BRDT	BRDT_7	ATGCAGAAATACATACCAGGAGG	448
BRDT	BRDT_8	TCTTAGCTGTGTGATTTAGGAGG	288
BRDT	BRDT_9	ACGCCTGTTCTTCCTTCAGGCGG	364
BRDT	BRDT_10	AACAAGGGTAGTATTGGCAGAGG	260
BRPF1	BRPF1_1	ATTCTAGATGTGACAGCATGGGG	246
BRPF1	BRPF1_2	TTCTAGATGTGACAGCATGGGGG	414
BRPF1	BRPF1_3	TAGATGTGACAGCATGGGGGTGG	259
BRPF1	BRPF1_4	AGACTTTCTGCCACAACTTGCGG	250
BRPF1	BRPF1_5	GCTTAGTCGCCCGCAAGTTGTGG	326
BRPF1	BRPF1_6	GCCACCATACGAGTGCCCGGTGG	224
BRPF1	BRPF1_7	TCCACCGGGCACTCGTATGGTGG	507
BRPF1	BRPF1_8	AAGGTCTACAAGAGTTACAGTGG	241
BRPF1	BRPF1_9	CGTGGTCATAGTGGTACAGGTGG	54
BRPF1	BRPF1_10	GTGGGTTGTCGTGGTCATAGTGG	1
BRPF3	BRPF3_1	CATGGCACCTGGGAACTGAGGGG	296
BRPF3	BRPF3_2	CTCATGGCACCTGGGAACTGAGG	231
BRPF3	BRPF3_3	CTCAGTTCCCAGGTGCCATGAGG	259
BRPF3	BRPF3_4	TTCTGCCGGGACTTCCGACGAGG	427
BRPF3	BRPF3_5	GAAGTCCCGGCAGAATGCCGAGG	100
BRPF3	BRPF3_6	TGAGCACTTGAGACTGTAGGGGG	528
BRPF3	BRPF3_7	GTGAGCACTTGAGACTGTAGGGG	2
BRPF3	BRPF3_8	TGACATATGCCCAGGCCCAGCGG	426
BRPF3	BRPF3_9	CCAGGCCCAGCGGATTGTCGAGG	248
BRPF3	BRPF3_10	TACGGAAGCTGGGCTGTGGGAGG	413
BRWD1	BRWD1_1	GTCTTACCCGACTCGATGAGAGG	0
BRWD1	BRWD1_2	ATCGAGTCGGGTAAGACGCGAGG	317
BRWD1	BRWD1_3	GATAAGGAAGTACAGCTCTGCGG	265
BRWD1	BRWD1_4	ACCTGCGGCCGAGAGACGCGCGG	411
BRWD1	BRWD1_5	GAGAGCGGCCCAGGTGAGTGCGG	265
BRWD1	BRWD1_6	ACGACGGCTCCGCCATGGCCGGG	204
BRWD1	BRWD1_7	GACGACGGCTCCGCCATGGCCGG	312
BRWD1	BRWD1_8	GATGAGAGGCACCGGGCGTCGGG	371
BRWD1	BRWD1_9	CGATGAGAGGCACCGGGCGTCGG	453
BRWD1	BRWD1_10	CCCGACTCGATGAGAGGCACCGG	346
BTAF1	BTAF1_1	CGGCCATGGCGGTCTCCAGGTGG	336
BTAF1	BTAF1_2	TGCACAGCAACTTGGAGAAGTGG	372
BTAF1	BTAF1_3	CCAGACAAGGTGCTTTTAAGTGG	301
BTAF1	BTAF1_4	TCGGAAGTAGGTTCTACATGAGG	225
BTAF1	BTAF1_5	GTGAAGTGGATCCTAAAGAGAGG	2
BTAF1	BTAF1_6	AACAAAGGATGCTGAAGTTGGGG	425
BTAF1	BTAF1_7	CAGTGGAAACTAATGAGAAGAGG	195
BTAF1	BTAF1_8	TAGCAATGATAGCACTGATGGGG	498
BTAF1	BTAF1_9	CAGCTCTTCCTTAATTGAAGAGG	206
BTAF1	BTAF1_10	CCTTTTTAATCCCTCCTGGGAGG	199
C11orf30	C11orf30_1	AAGCAGCAATGCCTGTTGTGTGG	192
C11orf30	C11orf30_2	CAGTGCACTTCGGGCACAGGGGG	314
C11orf30	C11orf30_3	CTCTCCGAACTTCAGCACGGTGG	369
C11orf30	C11orf30_4	GGAACGAGCCGGGGCATCAGTGG	408
C11orf30	C11orf30_5	GCGGTTTGGGGAACGAGCCGGGG	111
C11orf30	C11orf30_6	GTTACAGTAAAGGCGGTTTGGGG	1
C11orf30	C11orf30_7	ATTAGCTGTTACAGTAAAGGCGG	219
C11orf30	C11orf30_8	GGTAGAGGTTGGGGTTGACGTGG	497
C11orf30	C11orf30_9	ACCTCTACCCCTGTTCCAAGTGG	414
C11orf30	C11orf30_10	GCCACTTGGAACAGGGGTAGAGG	401
C14orf169	C14orf169_1	AGTGCAGGGCCGTTGAGGCGCGG	368
C14orf169	C14orf169_2	CGCAAGCCCCAGCCACACAGCGG	270
C14orf169	C14orf169_3	ACCGACCCGCTGTGTGGCTGGGG	457
C14orf169	C14orf169_4	GCCAGGACCGACCCGCTGTGTGG	544
C14orf169	C14orf169_5	CGGTCCTGGCCCTGCCCTTGAGG	507
C14orf169	C14orf169_6	TATCCCGCATGGCAGCGCTGAGG	497
C14orf169	C14orf169_7	GCGTCCTCAGCGCTGCCATGCGG	426
C14orf169	C14orf169_8	GCTGCCTAGCGAGAACTCGGAGG	195
C14orf169	C14orf169_9	GCGAGAACTCGGAGGAATCGAGG	267
C14orf169	C14orf169_10	GAACTCGGAGGAATCGAGGGTGG	319
CARM1	CARM1_1	AGCCGGATCTAAGATGGCAGCGG	327
CARM1	CARM1_2	CGGATCTAAGATGGCAGCGGCGG	471
CARM1	CARM1_3	ATCTAAGATGGCAGCGGCGGCGG	334
CARM1	CARM1_4	CGTCGCCGATGGTGAGGAGGCGG	313
CARM1	CARM1_5	TCGCGTCGCCGATGGTGAGGAGG	451
CARM1	CARM1_6	CGTTCGCGTCGCCGATGGTGAGG	332
CARM1	CARM1_7	ACGCGAACGGCGAGATCCAGCGG	494
CARM1	CARM1_8	CGGCGAGATCCAGCGGCACGCGG	313
CARM1	CARM1_9	GCAGCAGGCGCTGCGCCTCGAGG	329
CARM1	CARM1_10	CCTCTACAGCCGTGAGTACGGGG	179
CBX1	CBX1_1	TGTGCCCTCTGGTTTCAGTGAGG	352
CBX1	CBX1_2	GTTGTCCTCACTGAAACCAGAGG	1
CBX1	CBX1_3	TTACAGTCAGAAAAGCCACGAGG	174
CBX1	CBX1_4	TGAAATGGTGAGTCGGCCAGTGG	330
CBX1	CBX1_5	CTGCAGGAAAAACTCTGATGAGG	203
CBX1	CBX1_6	GTGGCATTCCTACCCCTCGGAGG	1
CBX1	CBX1_7	AAAAGTTCTCGACCGTCGAGTGG	446
CBX1	CBX1_8	AGAGTAAGTTTCACTGACACAGG	358
CBX1	CBX1_9	TTGTCCTCACTGAAACCAGAGGG	451
CBX1	CBX1_10	GTTTCAGTGAGGACAACACATGG	9
CBX2	CBX2_1	CTTGCTCAGGATGCACTCGGCGG	449
CBX2	CBX2_2	CCGAGTGCATCCTGAGCAAGCGG	388
CBX2	CBX2_3	GCGGCTCCGCAAGGTGCGTGCGG	538
CBX2	CBX2_4	GCCCTGCGGGGAGAGAAGAGGGG	240
CBX2	CBX2_5	TTGCCCTGCGGGGAGAGAAGAGG	284
CBX2	CBX2_6	GTACTCCAGCTTGCCCTGCGGGG	11
CBX2	CBX2_7	AGGTACTCCAGCTTGCCCTGCGG	339
CBX2	CBX2_8	AGCTGGAGTACCTGGTCAAGTGG	351
CBX2	CBX2_9	GAGTACCTGGTCAAGTGGCGCGG	288
CBX2	CBX2_10	GTCGCGGGGGACTCACTTGGAGG	2
CBX3	CBX3_1	AAACAGGCTGACAAACCAAGAGG	132
CBX3	CBX3_2	AACACAGTGCTGACAATACTTGG	404
CBX3	CBX3_3	ACACAGTGCTGACAATACTTGGG	438
CBX3	CBX3_4	AGACTTGGTGCTGGCGAAAGAGG	250
CBX3	CBX3_5	GGCCTCCAACAAAACTACATTGG	141
CBX3	CBX3_6	AGAGCCTGAAGAATTTGTCGTGG	294
CBX3	CBX3_7	TACCAATGTAGTTTTGTTGGAGG	329
CBX3	CBX3_8	AAACAGGAAAGATTCAGATGAGG	327
CBX3	CBX3_9	ACTTACCAATGTAGTTTTGTTGG	261
CBX3	CBX3_10	TGAAAAAATGTCTTCTAAACAGG	132
CBX4	CBX4_1	TGTTGGCGAGCACGTCTTCGCGG	460
CBX4	CBX4_2	TGGCGAGCACGTCTTCGCGGTGG	508
CBX4	CBX4_3	AGCGGATCCGCAAGGTAGGGCGG	306
CBX4	CBX4_4	ATCCGCAAGGTAGGGCGGCGCGG	364
CBX4	CBX4_5	ATACTCCACTCTGCCCTGGGGGG	431
CBX4	CBX4_6	GATACTCCACTCTGCCCTGGGGG	338
CBX4	CBX4_7	AGATACTCCACTCTGCCCTGGGG	474
CBX4	CBX4_8	CTGGTCGCCCAAGTAAGTCGCGG	308
CBX4	CBX4_9	GTCGCCCAAGTAAGTCGCGGCGG	1
CBX4	CBX4_10	GCCCAAGTAAGTCGCGGCGGAGG	419
CBX5	CBX5_1	AGCTGACAGTTCTTCTTCAGAGG	449
CBX5	CBX5_2	CAGTTCTTCTTCAGAGGATGAGG	457
CBX5	CBX5_3	GCGCGTGGTTAAGGGACAAGTGG	321
CBX5	CBX5_4	CAGAGCAATGATATCGCTCGGGG	254
CBX5	CBX5_5	ATCGCTCGGGGCTTTGAGAGAGG	186
CBX5	CBX5_6	GACATGGCATGCATATCCTGAGG	189
CBX5	CBX5_7	GCATGCATATCCTGAGGATGCGG	340
CBX5	CBX5_8	AAACAGCAAAGAGCTAAAGGAGG	258
CBX5	CBX5_9	ACAGCAAAGAGCTAAAGGAGGGG	212
CBX5	CBX5_10	GGATGAGGAGGAGTATGTTGTGG	415
CBX6	CBX6_1	GACAGCTCCATCTTGCTCAGCGG	355
CBX6	CBX6_2	CAAGATGGAGCTGTCTGCAGTGG	329
CBX6	CBX6_3	AGCTGTCTGCAGTGGGCGAGCGG	338
CBX6	CBX6_4	AGTGGGCGAGCGGGTCTTCGCGG	447
CBX6	CBX6_5	GAAAGGTGAGCCGCCGCCCGGGG	357
CBX6	CBX6_6	TGCGTCCCTGAAAAACAGAGGGG	260
CBX6	CBX6_7	GATGCGTCCCTGAAAAACAGAGG	353
CBX6	CBX6_8	AGTACCTGGTGAAATGGAAGGGG	286
CBX6	CBX6_9	GGGCGATCAAGTGAGTGTCGCGG	298
CBX6	CBX6_10	AGTGAGTGTCGCGGGGTCCGGGG	609
CBX7	CBX7_1	GACAGCTCCATGCGGGGCGGCGG	533
CBX7	CBX7_2	GCTGACAGCTCCATGCGGGGCGG	254
CBX7	CBX7_3	ATGGCTGACAGCTCCATGCGGGG	275
CBX7	CBX7_4	CGATGGCTGACAGCTCCATGCGG	394
CBX7	CBX7_5	CGGCGAGCAGGTGTTCGCCGTGG	119
CBX7	CBX7_6	GCATCCGGAAGAAGCGCGTGCGG	381
CBX7	CBX7_7	AGAAGCGCGTGCGGAAGGTGAGG	368
CBX7	CBX7_8	CATGAAGGAGCTTACTTTGGGGG	302
CBX7	CBX7_9	ACATGAAGGAGCTTACTTTGGGG	220
CBX7	CBX7_10	CACGTGCTGTACCTGGGGAGAGG	261
CBX8	CBX8_1	AGTCAACATGGAGCTTTCAGCGG	343
CBX8	CBX8_2	CAACATGGAGCTTTCAGCGGTGG	294
CBX8	CBX8_3	ACATGGAGCTTTCAGCGGTGGGG	241
CBX8	CBX8_4	CATGGAGCTTTCAGCGGTGGGGG	204
CBX8	CBX8_5	AGCTTTCAGCGGTGGGGGAGCGG	341
CBX8	CBX8_6	GGTGGGGGAGCGGGTGTTCGCGG	490
CBX8	CBX8_7	TCCGTATGCGCCGCTTCAGGAGG	522
CBX8	CBX8_8	AGGTATTCCATGCGTCCCTGCGG	468
CBX8	CBX8_9	ACCATCCCTTCCATTTCACGAGG	562
CBX8	CBX8_10	GTACAGCACATGGGAACCGGAGG	2
CCDC101	CCDC101_1	ACGAGGGCCATTGTCTACAGGGG	328
CCDC101	CCDC101_2	TGCGGGAATCGGCAGACACGAGG	243
CCDC101	CCDC101_3	CTGTGAGAAGTTCTGCAATGCGG	392
CCDC101	CCDC101_4	CCTTACAGGAAGAGCGTTCGCGG	326
CCDC101	CCDC101_5	ACATCCAGAAGACCCATGAGCGG	402
CCDC101	CCDC101_6	GTAATAGGGAGAAACTGCAGAGG	5
CCDC101	CCDC101_7	TATTACCGGACAAAGCTGCGTGG	287
CCDC101	CCDC101_8	CGGCCTTGGCGGTTGTGTAGAGG	363
CCDC101	CCDC101_9	AACCGCCAAGGCCGATGCAGAGG	425
CCDC101	CCDC101_10	TCCGAAGGATGCTGAGGGCGGGG	158
CCNT1	CCNT1_1	TTCTGGTTGAAGCACTATGGAGG	375
CCNT1	CCNT1_2	ACTTTCTTATCGCCAGCAGGCGG	435
CCNT1	CCNT1_3	CGTCTTAACGTGTATCCTTGTGG	500
CCNT1	CCNT1_4	AAGTGCACTCAACTTGTTCGAGG	351
CCNT1	CCNT1_5	GAAGCACTATGGAGGGAGAGAGG	348
CCNT1	CCNT1_6	GGAAGAACAACAACAAACGGTGG	246
CCNT1	CCNT1_7	CTTGTTTCTAGCAGCTAAAGTGG	186
CCNT1	CCNT1_8	GTTTCTAGCAGCTAAAGTGGAGG	0
CCNT1	CCNT1_9	GCCTTCTGGTTGAAGCACTATGG	318
CCNT1	CCNT1_10	TCCATAGTGCTTCAACCAGAAGG	406
CDC73	CDC73_1	GGCGAGGGGGGGGAAGATGGCGG	298
CDC73	CDC73_2	CATCCAGAAGAAGGAGATTGTGG	247
CDC73	CDC73_3	GGGAGACGAAGTGATCTTCGGGG	151
CDC73	CDC73_4	AAGACCAACTATGTTGTTTGGGG	198
CDC73	CDC73_5	AGACCAACTATGTTGTTTGGGGG	263
CDC73	CDC73_6	GGGTAAGTCCGGCATGGCTGTGG	404
CDC73	CDC73_7	GAGATTGGCTGCCCGTTTGGAGG	383
CDC73	CDC73_8	TTTGTCTGAAGCTATGTCAGTGG	197
CDC73	CDC73_9	ACATAACTGCCCTTAAACAGAGG	226
CDC73	CDC73_10	TCAGCAGAGAGAGAGTATGGAGG	287
CDK2AP1	CDK2AP1_1	CCATGCTGGTGGAAGGCGAGTGG	223
CDK2AP1	CDK2AP1_2	TACACCCAGGTATGTCAATGGGG	425
CDK2AP1	CDK2AP1_3	ACACCCAGGTATGTCAATGGGGG	343
CDK2AP1	CDK2AP1_4	GCCATGGAGAGGCTGAAGCGCGG	321
CDK2AP1	CDK2AP1_5	GTGAATGATGCCTGAAACAGAGG	1
CDK2AP1	CDK2AP1_6	TCAGGCATCATTCACGCTAGAGG	441
CDK2AP1	CDK2AP1_7	TGAAGACGTTGCCATGCTGGTGG	397
CDK2AP1	CDK2AP1_8	TGGCCATCATTGAAGAGCTGGGG	445
CDK2AP1	CDK2AP1_9	ACTCTTGCTCCCTGCGTACGTGG	408
CDK2AP1	CDK2AP1_10	GGAGCAAGAGTGCCATGGAGAGG	312
CDK9	CDK9_1	GGCAAAGCAGTACGACTCGGTGG	426
CDK9	CDK9_2	GGGTAAGGCTGGGCCCCTCGGGG	348
CDK9	CDK9_3	CTCCCTTTCCGCCTGCAGGGAGG	317
CDK9	CDK9_4	CTTGAACACCTCCCTGCAGGCGG	276
CDK9	CDK9_5	CCGCAAGACCGGCCAGAAGGTGG	354
CDK9	CDK9_6	GCTGATGGAAAACGAGAAGGAGG	253
CDK9	CDK9_7	GATGGAAAACGAGAAGGAGGGGG	343
CDK9	CDK9_8	GTGAGTACGGATCGGGCGTGCGG	2
CDK9	CDK9_9	AGTTCCCCATTACAGCCTTGCGG	346
CDK9	CDK9_10	TCTCCCGCAAGGCTGTAATGGGG	478
CDY1	CDY1_1	GCTGCTTTATATCCCAACAGAGG	421
CDY1	CDY1_2	TCATTCTGTGTCTTTCTGGGAGG	284
CDY1	CDY1_3	TATCCTAGAATACCTCTGTTGGG	318
CDY1	CDY1_4	TATCCCAACAGAGGTATTCTAGG	272
CDY1	CDY1_5	AGACACAGAATGATCAGAGATGG	347
CDY1	CDY1_6	CATTCTGTGTCTTTCTGGGAGGG	333
CDY1	CDY1_7	TGATCATTCTGTGTCTTTCTGGG	298
CDY1	CDY1_8	CTGTGTCTTTCTGGGAGGGAAGG	570
CDY1	CDY1_9	CTGATCATTCTGTGTCTTTCTGG	315
CDY1	CDY1_10	ATATCCTAGAATACCTCTGTTGG	186
CDY1B	CDY1B_1	GCTGCTTTATATCCCAACAGAGG	403
CDY1B	CDY1B_2	TCATTCTGTGTCTTTCTGGGAGG	309
CDY1B	CDY1B_3	TATCCTAGAATACCTCTGTTGGG	291
CDY1B	CDY1B_4	TATCCCAACAGAGGTATTCTAGG	249
CDY1B	CDY1B_5	AGACACAGAATGATCAGAGATGG	349
CDY1B	CDY1B_6	CATTCTGTGTCTTTCTGGGAGGG	344
CDY1B	CDY1B_7	TGATCATTCTGTGTCTTTCTGGG	301
CDY1B	CDY1B_8	CTGTGTCTTTCTGGGAGGGAAGG	525
CDY1B	CDY1B_9	CTGATCATTCTGTGTCTTTCTGG	290
CDY1B	CDY1B_10	ATATCCTAGAATACCTCTGTTGG	170
CDY2A	CDY2A_1	CAGTTTTCTTGTGGTCAAAGGGG	385
CDY2A	CDY2A_2	GACCACAAGAAAACTGTGAGTGG	244
CDY2A	CDY2A_3	CACAGTTTTCTTGTGGTCAAAGG	209
CDY2A	CDY2A_4	ACAGTTTTCTTGTGGTCAAAGGG	204
CDY2A	CDY2A_5	AGCCACTCACAGTTTTCTTGTGG	314
CDY2A	CDY2A_6	ACTTGCAGTTTTTGGACCTGTGG	271
CDY2A	CDY2A_7	GATGTGACAAAGGGTCCCGGAGG	273
CDY2A	CDY2A_8	CAGGATGTGACAAAGGGTCCCGG	329
CDY2A	CDY2A_9	CGGGACCCTTTGTCACATCCTGG	408
CDY2A	CDY2A_10	CTGCACCAGGATGTGACAAAGGG	399
CDY2B	CDY2B_1	CAGTTTTCTTGTGGTCAAAGGGG	357
CDY2B	CDY2B_2	GACCACAAGAAAACTGTGAGTGG	272
CDY2B	CDY2B_3	CACAGTTTTCTTGTGGTCAAAGG	157
CDY2B	CDY2B_4	ACAGTTTTCTTGTGGTCAAAGGG	191
CDY2B	CDY2B_5	AGCCACTCACAGTTTTCTTGTGG	338
CDY2B	CDY2B_6	ACTTGCAGTTTTTGGACCTGTGG	265
CDY2B	CDY2B_7	GATGTGACAAAGGGTCCCGGAGG	261
CDY2B	CDY2B_8	CAGGATGTGACAAAGGGTCCCGG	362
CDY2B	CDY2B_9	CGGGACCCTTTGTCACATCCTGG	431
CDY2B	CDY2B_10	CTGCACCAGGATGTGACAAAGGG	378
CDYL	CDYL_1	TAACGGGGCTTTTAGGCACGAGG	167
CDYL	CDYL_2	CGTTAAGAGCAGGACCGCAGTGG	376
CDYL	CDYL_3	GCTCTGAAAGCCGTCCACTGCGG	172
CDYL	CDYL_4	CCCCGTCGAGCAGGGTCAGGAGG	411
CDYL	CDYL_5	AGTGGCACCCGAAGTGGCAGCGG	367
CDYL	CDYL_6	TATTGGGCCCCGGTGCCGAGAGG	215
CDYL	CDYL_7	GTGCCGAGAGGGCCAGGATGGGG	6
CDYL	CDYL_8	GTCACAGGGCCGGGCACCTGAGG	13
CDYL	CDYL_9	AGCGATTGCGTTTCAGCGTGAGG	473
CDYL	CDYL_10	GTTATTCTCTGAGGACTTTGTGG	0
CDYL2	CDYL2_1	CCAGAAGCCATGCCAGGCTGCGG	241
CDYL2	CDYL2_2	GGCTTCTGGGGACCTTTACGAGG	188
CDYL2	CDYL2_3	CTTTACGAGGTACGGGGACGCGG	364
CDYL2	CDYL2_4	TTACGAGGTACGGGGACGCGGGG	374
CDYL2	CDYL2_5	TACGAGGTACGGGGACGCGGGGG	416
CDYL2	CDYL2_6	GAAAGGCTACGGGAGCACCGAGG	0
CDYL2	CDYL2_7	ACGGGAGCACCGAGGACACGTGG	510
CDYL2	CDYL2_8	ACTCCTCACAGTGCAAGAGGTGG	406
CDYL2	CDYL2_9	TAAACTCCTCACAGTGCAAGAGG	320
CDYL2	CDYL2_10	TGCACATGTCCAAGGACAAGAGG	296
CECR2	CECR2_1	TGGAACACGAATGTACAAAGAGG	316
CECR2	CECR2_2	TGCAGTTTCTTCCGTTTTGGGGG	170
CECR2	CECR2_3	ACATTACCATGTCTTGTCTGTGG	282
CECR2	CECR2_4	GGCCAGGCCAAGGTACTTGGTGG	302
CECR2	CECR2_5	TCACCGAGAGTTTTCGCGAGAGG	326
CECR2	CECR2_6	GCTCTACAAGCTCCTCAGTGAGG	233
CECR2	CECR2_7	CAGGCAGGAAGTCCTCACTGAGG	326
CECR2	CECR2_8	AACTCTGCCTTTGTGCGCTGTGG	345
CECR2	CECR2_9	AGGCAGAGTTGCATCCTAGGTGG	355
CECR2	CECR2_10	TGACGGGTTTGATGGACAGGTGG	531
CENPA	CENPA_1	GGGCCCATGACACGCCGCAGAGG	364
CENPA	CENPA_2	CCGCCGGAGCCGAAAGCCCGAGG	203
CENPA	CENPA_3	GCCGAAAGCCCGAGGCCCCGAGG	260
CENPA	CENPA_4	TAAGGAGGGGCCCCGCCGGGAGG	122
CENPA	CENPA_5	GCGGCCGGTTACCTAAGGAGGGG	339
CENPA	CENPA_6	CCTCCTTAGGTAACCGGCCGCGG	375
CENPA	CENPA_7	CCTCCCATCAACACAGTCGGCGG	535
CENPA	CENPA_8	AGGGCAGCTTCCTTATCAAGAGG	348
CENPA	CENPA_9	AGCTCCCGGAGCTTACCAGGCGG	221
CENPA	CENPA_10	CTCGGCCTGCATGTAAGGTGAGG	429
CHD1	CHD1_1	TCAGCTCCATCAACTTTCGGTGG	362
CHD1	CHD1_2	ACCGAAAGTTGATGGAGCTGAGG	293
CHD1	CHD1_3	CATCAAGCCTCATCTAATAGCGG	298
CHD1	CHD1_4	TTCTGATCCGCTATTAGATGAGG	255
CHD1	CHD1_5	ATCTAATAGCGGATCAGAAGAGG	209
CHD1	CHD1_6	ATCGGAATCTTCACTGCTAGAGG	414
CHD1	CHD1_7	TTCCGATGACTCATCAAGTGAGG	343
CHD1	CHD1_8	CTGAGACCATACCTATTTTGAGG	254
CHD1	CHD1_9	GAGACAGATTGATTCATCTGAGG	316
CHD1	CHD1_10	ACAGATTGATTCATCTGAGGAGG	286
CHD2	CHD2_1	CGCTACACAGCAATGCATCGAGG	347
CHD2	CHD2_2	TGAACCCGAAGCTTCTTCAGAGG	161
CHD2	CHD2_3	CAGGGAAGTGATCCAGGAAGTGG	347
CHD2	CHD2_4	AGCTATCCGTTCCTTCTTAGAGG	379
CHD2	CHD2_5	CTGATGTTTATGGGGTCAGGCGG	402
CHD2	CHD2_6	TTGCCTTCAGTGTGTGAGGGGGG	443
CHD2	CHD2_7	CTTGCCTTCAGTGTGTGAGGGGG	379
CHD2	CHD2_8	CTACTTGCCTTCAGTGTGTGAGG	494
CHD2	CHD2_9	CACACACTGAAGGCAAGTAGCGG	444
CHD2	CHD2_10	GCAAGTAGCGGGTCTGAGAGTGG	377
CHD3	CHD3_1	GGTGTGAAGAAGAGAAAACGAGG	273
CHD3	CHD3_2	ACACGCTTCTTGCGTTTTCGGGG	334
CHD3	CHD3_3	TTCTTTCTCTTAGGACAGTGAGG	311
CHD3	CHD3_4	TTTCTCTTAGGACAGTGAGGAGG	403
CHD3	CHD3_5	TACCGGGAGAAGTCAGAGAGTGG	370
CHD3	CHD3_6	AGACAAAGCGGCGGAAAAAGGGG	386
CHD3	CHD3_7	GACAAAGCGGCGGAAAAAGGGGG	301
CHD3	CHD3_8	AAAGCGGCGGAAAAAGGGGGAGG	248
CHD3	CHD3_9	TGTTCCACTTGCTGCGGGAGAGG	396
CHD3	CHD3_10	GACTTCTGTTCCACTTGCTGCGG	327
CHD4	CHD4_1	TCCCTGGCCGGGAGCGGAAGGGG	271
CHD4	CHD4_2	CTCACTGCCCGCCGAGCAGGGGG	300
CHD4	CHD4_3	CCTCACTGCCCGCCGAGCAGGGG	329
CHD4	CHD4_4	CTGCTCGGCGGGCAGTGAGGAGG	317
CHD4	CHD4_5	CTCGGCGGGCAGTGAGGAGGAGG	413
CHD4	CHD4_6	GAGCAAGCGCCAAAAAAAGGAGG	210
CHD4	CHD4_7	CGCCAAAAAAAGGAGGTGAGTGG	226
CHD4	CHD4_8	TGCTCTTATGCCGGCAGCTGGGG	276
CHD4	CHD4_9	GCTCTTATGCCGGCAGCTGGGGG	279
CHD4	CHD4_10	TGGGGAGGGGCCAGAGTTTGTGG	336
CHD5	CHD5_1	GGGCCCAGTGGGCACCGAGGAGG	133
CHD5	CHD5_2	GCACCGAGGAGGAGCTGCCGCGG	166
CHD5	CHD5_3	GCTGCCGCGGCTGTTCGCCGAGG	259
CHD5	CHD5_4	ATCTCCTCGGCGAACAGCCGCGG	222
CHD5	CHD5_5	CGCCGAGGAGATGGAGAATGAGG	588
CHD5	CHD5_6	AGGACGAGATGTCAGGTGAGCGG	497
CHD5	CHD5_7	GACGAGATGTCAGGTGAGCGGGG	241
CHD5	CHD5_8	GATGTCAGGTGAGCGGGGCGCGG	428
CHD5	CHD5_9	CTTCTGGAAAAATCAGAAGGTGG	86
CHD5	CHD5_10	CTTCGATGACTTTTTCCCTGTGG	318
CHD6	CHD6_1	GACAGAGGCATCAGACATTGGGG	356
CHD6	CHD6_2	ATCAGTGCTGCAGTCAAATGGGG	484
CHD6	CHD6_3	GCAGTATACAGGTCCTTCTGAGG	323
CHD6	CHD6_4	GGACCTGTATACTGCTGAAGAGG	319
CHD6	CHD6_5	TTGGTGCCCGAGGCCTCCCGGGG	299
CHD6	CHD6_6	TTTGGCCTCCTTGGTGCCCGAGG	353
CHD6	CHD6_7	GGAGCAAGGACCAACCCCAGTGG	295
CHD6	CHD6_8	GCCTGACGAACCCATCTCTGCGG	312
CHD6	CHD6_9	CAGGTACAGCTGTGACCGGGAGG	311
CHD6	CHD6_10	TGAGGACCTGGACTTCAAAGTGG	303
CHD7	CHD7_1	CTTGAAGGCCTCGGAGAATGTGG	265
CHD7	CHD7_2	ATGAAGGGATGGCTGTAAAGAGG	240
CHD7	CHD7_3	AGACGCGAGTCCGTTCCCAGGGG	450
CHD7	CHD7_4	GGGGTGTGATACTGCGAGTGCGG	732
CHD7	CHD7_5	GGGCACCTGAGGAACGGGAGGGG	417
CHD7	CHD7_6	TGGGGCACCTGAGGAACGGGAGG	455
CHD7	CHD7_7	GTTCCTCAGGTGCCCCATGGTGG	2
CHD7	CHD7_8	GAGGCATGGGCAATCCTTTGTGG	357
CHD7	CHD7_9	CTGGTACCTGAACAGCCCTGGGG	82
CHD7	CHD7_10	CTGAGGGTGGCCCTGTGCAGGGG	376
CHD8	CHD8_1	CTCCAGACTGTGGCTGCTGGAGG	411
CHD8	CHD8_2	CCTTGGGGACCTCCAGACTGTGG	313
CHD8	CHD8_3	GGCTGCGATGATGGTGGTTGTGG	376
CHD8	CHD8_4	TATCTGAGCCTGCTGTACAGAGG	493
CHD8	CHD8_5	ACTTTCAGTACCAGTCAAGGTGG	342
CHD8	CHD8_6	CTATGTAAGTCTCTCACCTGTGG	223
CHD8	CHD8_7	ATAGGCTGGCTCTTCCCAAGGGG	176
CHD8	CHD8_8	CAAGCTCTGCTCCTCATTCGGGG	506
CHD8	CHD8_9	AGCTCTGCTCCTCATTCGGGGGG	286
CHD8	CHD8_10	CCTGTCTTTCCCCCCGAATGAGG	452
CHD9	CHD9_1	TATCAGATGGCAGTCCAATGTGG	311
CHD9	CHD9_2	TCAGATGGCAGTCCAATGTGGGG	352
CHD9	CHD9_3	CATTAGTCATCTGTGGTGGGTGG	282
CHD9	CHD9_4	CTTGATGACTGCTACACTTGTGG	285
CHD9	CHD9_5	ATTAGATGCAAGAACTGCAGAGG	298
CHD9	CHD9_6	TCTTGCTTGATTCCTCTATGAGG	256
CHD9	CHD9_7	ATTCACAGGACTTGACCCCGAGG	381
CHD9	CHD9_8	GAAGAAGACCCTCCTGAAGGAGG	235
CHD9	CHD9_9	ATAGCAAAAGCAAAGGAGCGTGG	173
CHD9	CHD9_10	TTTTCAGGGCTCATTACTCGTGG	317
CHORDC1	CHORDC1_1	AGACCAATTCCGACGGTAAGAGG	329
CHORDC1	CHORDC1_2	GAGTTTCTCTTACATTACAGGGG	153
CHORDC1	CHORDC1_3	TTACCGTCGGAATTGGTCTCAGG	505
CHORDC1	CHORDC1_4	GTTCCTCTTACCGTCGGAATTGG	3
CHORDC1	CHORDC1_5	CGGCGCGTTCCTCTTACCGTCGG	440
CHORDC1	CHORDC1_6	GGGTGGTATGTGCAAGCATCTGG	423
CHORDC1	CHORDC1_7	CACTAACAGGGCTGTACAAAAGG	366
CHORDC1	CHORDC1_8	AGACCCTGGTATGTCTAAAAAGG	179
CHORDC1	CHORDC1_9	AGTTACCCCTCATGGAAAATAGG	243
CHORDC1	CHORDC1_10	CATGCATAAGTTACCCCTCATGG	317
CHRAC1	CHRAC1_1	TGGCTTACAGACCAGTTTGGTGG	368
CHRAC1	CHRAC1_2	GTCGTGGGTAAAGACAAGGGCGG	6
CHRAC1	CHRAC1_3	CGTGGGTAAAGACAAGGGCGGGG	289
CHRAC1	CHRAC1_4	ATGACCCGGATGCGGGATAGAGG	330
CHRAC1	CHRAC1_5	CATCATGAAGAGCTCCCCCGAGG	413
CHRAC1	CHRAC1_6	GTTGATGCTGGACACCTCGGGGG	3
CHRAC1	CHRAC1_7	GGTTGATGCTGGACACCTCGGGG	451
CHRAC1	CHRAC1_8	TCACGGCCAAGGCCACGGTGAGG	344
CHRAC1	CHRAC1_9	ACGGCCAAGGCCACGGTGAGGGG	362
CHRAC1	CHRAC1_10	CGGCCAAGGCCACGGTGAGGGGG	166
CLOCK	CLOCK_1	CTGTCATCTCTAAAAGAAAGCGG	115
CLOCK	CLOCK_2	TTCTGTTGTCACATGCTGCGAGG	392
CLOCK	CLOCK_3	AAAACCATTGTGTGCTGAAGAGG	180
CLOCK	CLOCK_4	GGCAAATACCCTATTATGGGTGG	112
CLOCK	CLOCK_5	ATTATAGGTTCCTGACTAAGGGG	254
CLOCK	CLOCK_6	TCCTGACTAAGGGGCAACAGTGG	441
CLOCK	CLOCK_7	ACTCCGAGAAGAGGCAGAAGGGG	258
CLOCK	CLOCK_8	TTTTCTTGAACTCCGAGAAGAGG	256
CLOCK	CLOCK_9	TAGTCAGGTAAGCTCTTTAGTGG	367
CLOCK	CLOCK_10	TTCAGATGGTCCATGGTCAGGGG	591
CRB1	CRB1_1	GAAACTACCATTGGTTCCTGTGG	190
CRB1	CRB1_2	AAGAACTCCTGCCAACATGGAGG	393
CRB1	CRB1_3	TTCCAGCCCTTGCCAAAATGGGG	266
CRB1	CRB1_4	CAGACACTGCGACTTGGAAGTGG	398
CRB1	CRB1_5	TTCAGATCCCTGCAAGAACGAGG	153
CRB1	CRB1_6	CACTTACCAGAATAATTGTGGGG	292
CRB1	CRB1_7	TAACCCCTGCCAGTCCAATGGGG	452
CRB1	CRB1_8	ATTCCCCATTGGACTGGCAGGGG	241
CRB1	CRB1_9	CCAGTCCAATGGGGAATGTGTGG	249
CRB1	CRB1_10	GCGTCCATATTGTTTCTCTGAGG	242
CRB2	CRB2_1	TCTGAGGCACAGGCACTGGGGGG	380
CRB2	CRB2_2	GTCTGAGGCACAGGCACTGGGGG	12
CRB2	CRB2_3	GAGTGCCAGGCTACCGAGAGTGG	255
CRB2	CRB2_4	TGCCAGGCTACCGAGAGTGGTGG	675
CRB2	CRB2_5	GAGAGTGGTGGCTATACCTGTGG	339
CRB2	CRB2_6	TGTGGGCCCATGGAGCCCCGGGG	294
CRB2	CRB2_7	GCACACACAGAGCGCCGTGGTGG	215
CRB2	CRB2_8	GGGGCACACACAGAGCGCCGTGG	225
CRB2	CRB2_9	GCAGTAGCAGCGGAAGCCGGTGG	368
CRB2	CRB2_10	AACCCGGCACGCAGTAGCAGCGG	422
CRB3	CRB3_1	GTTCGCCATGGGCTGGGTGGCGG	4
CRB3	CRB3_2	GGGGTTCGCCATGGGCTGGGTGG	475
CRB3	CRB3_3	CCATGGCGAACCCCGGGCTGGGG	297
CRB3	CRB3_4	CCGTTCCTGCTGGCCCGCTGGGG	697
CRB3	CRB3_5	AGAAGTGGTCTGTACTGTGGAGG	350
CRB3	CRB3_6	TGCAGAAGTGGTCTGTACTGTGG	311
CRB3	CRB3_7	ATGGCAACCTGGTGAGTTGGAGG	326
CRB3	CRB3_8	GGCTTCTGGACGCTGCAGAGAGG	292
CRB3	CRB3_9	AGCCATCACTGCTATCATCGTGG	279
CRB3	CRB3_10	GGCTGCCTTGCTCCTGGCTGTGG	325
CREBBP	CREBBP_1	TTGGCTCTTTTGGGGTTGGGCGG	414
CREBBP	CREBBP_2	AGCTGAGTTTGGCTCTTTTGGGG	393
CREBBP	CREBBP_3	GGCGAATGACAGCACAGGTGAGG	265
CREBBP	CREBBP_4	GATGAGCTGATACCCAATGGAGG	313
CREBBP	CREBBP_5	CAACTGTCGGAGCTTCTACGAGG	207
CREBBP	CREBBP_6	CTGTCGGAGCTTCTACGAGGAGG	197
CREBBP	CREBBP_7	GAGCTTCTACGAGGAGGCAGCGG	323
CREBBP	CREBBP_8	GAAGAATCTCCCTGGCTCAGAGG	332
CREBBP	CREBBP_9	TGCCTGTTTAGGCAGGCTGGGGG	379
CREBBP	CREBBP_10	CTGCCTGTTTAGGCAGGCTGGGG	162
CSNK2A1	CSNK2A1_1	TGACAATAATCCAGGGCCTGTGG	259
CSNK2A1	CSNK2A1_2	AGTGTCTGCAGGACCAAAAGAGG	271
CSNK2A1	CSNK2A1_3	ATCTGGACTCACAGAAATAGGGG	260
CSNK2A1	CSNK2A1_4	TTCTGACCCGTTCATCCCACAGG	406
CSNK2A1	CSNK2A1_5	TCCAGGGCCTGTGGGATGAACGG	428
CSNK2A1	CSNK2A1_6	TTCAGCTACGACTAATAGACTGG	230
CSNK2A1	CSNK2A1_7	TCAGGTAAGAACAGAAGGGCAGG	422
CSNK2A1	CSNK2A1_8	CTAGTTGGTGAGGATAGCCAAGG	209
CSNK2A1	CSNK2A1_9	GTGTCTGCAGGACCAAAAGAGGG	14
CSNK2A1	CSNK2A1_10	TCGCTTTCGAGAGTGTCTGCAGG	354
CSNK2A2	CSNK2A2_1	CAGGGCCCGGGTCTACGCCGAGG	306
CSNK2A2	CSNK2A2_2	ACGCCGAGGTGAACAGTCTGAGG	280
CSNK2A2	CSNK2A2_3	CCTCGTAGTCCCAGTACTCGCGG	232
CSNK2A2	CSNK2A2_4	GAGGCTCACGTCCCGAGCTGGGG	586
CSNK2A2	CSNK2A2_5	AGGCTCACGTCCCGAGCTGGGGG	401
CSNK2A2	CSNK2A2_6	CTGGTTCGAAAACTTGGTCGGGG	293
CSNK2A2	CSNK2A2_7	TATCACCAACAATGAGAGAGTGG	252
CSNK2A2	CSNK2A2_8	GAAGGTGAGTGTCCTATGAGTGG	290
CSNK2A2	CSNK2A2_9	AAGATTCTGGAGAACCTTCGTGG	84
CSNK2A2	CSNK2A2_10	ATTCTGGAGAACCTTCGTGGTGG	310
CSRP2BP	CSRP2BP_1	TTCTGAGGTCGATGTTCTCGTGG	287
CSRP2BP	CSRP2BP_2	ATCGACCTCAGAAGGACTGGAGG	285
CSRP2BP	CSRP2BP_3	GCTCCTGATCGTCGAATCCGAGG	280
CSRP2BP	CSRP2BP_4	ATCCGAGGATCAGGCATCAGTGG	363
CSRP2BP	CSRP2BP_5	GACTTATCGCACGACCAGAGTGG	343
CSRP2BP	CSRP2BP_6	CTTATCGCACGACCAGAGTGGGG	304
CSRP2BP	CSRP2BP_7	CGTCTCCTTCATCACTGTTGAGG	350
CSRP2BP	CSRP2BP_8	AGGAGACGTGTCTTGGATGGAGG	423
CSRP2BP	CSRP2BP_9	TTTTTCTCCTAGGTCAGCTGAGG	219
CSRP2BP	CSRP2BP_10	GGAAAAAGACGTCTACCTGGTGG	218
CTBP1	CTBP1_1	GTCGGACGCCTGCAAGACAGAGG	1
CTBP1	CTBP1_2	AGGGGCCCGTTCATGATCGGAGG	357
CTBP1	CTBP1_3	TGAACGGGCCCCTGCACCCGCGG	314
CTBP1	CTBP1_4	AGCAATGCCACCAGGGGCCGCGG	541
CTBP1	CTBP1_5	CCATCCAGCAATGCCACCAGGGG	321
CTBP1	CTBP1_6	CTCGCTGCAGGTCCTGAACGAGG	218
CTBP1	CTBP1_7	GCAGGTCCTGAACGAGGCTGTGG	389
CTBP1	CTBP1_8	GGTCCTGAACGAGGCTGTGGGGG	496
CTBP1	CTBP1_9	CAATCCGGACGATGATGCGGAGG	291
CTBP1	CTBP1_10	TGCCAATCCGGACGATGATGCGG	339
CTBP2	CTBP2_1	GATACCTGCCAGGAGGGAAGGGG	394
CTBP2	CTBP2_2	GGGGGCGGATACCTGCCAGGAGG	418
CTBP2	CTBP2_3	AGGGTGGGCCCACCTTCTCGTGG	332
CTBP2	CTBP2_4	GGCTTCGTTTAGAACCTGCGTGG	175
CTBP2	CTBP2_5	GCAGGTTCTAAACGAAGCCGTGG	130
CTBP2	CTBP2_6	CGGCGAGCTCGGTGAGTGCGAGG	455
CTBP2	CTBP2_7	GGCAATTCCTGAAAGGGATGAGG	297
CTBP2	CTBP2_8	GGCACGTACCAAAGCCAATGAGG	460
CTBP2	CTBP2_9	GTTTCTGTACAGGTCGCACGGGG	0
CTBP2	CTBP2_10	TACAGGTCGCACGGGGCAGGCGG	490
CTR9	CTR9_1	CTTTTGACCCCATCATGTCGCGG	557
CTR9	CTR9_2	TTTGACCCCATCATGTCGCGGGG	278
CTR9	CTR9_3	TGGAGCCCCGCGACATGATGGGG	269
CTR9	CTR9_4	TCCCCTCCGGGACACTGACGAGG	300
CTR9	CTR9_5	ACCTCGTCAGTGTCCCGGAGGGG	288
CTR9	CTR9_6	TTACCTCGTCAGTGTCCCGGAGG	352
CTR9	CTR9_7	GAGGTAAGTGTCGTGTATGGAGG	536
CTR9	CTR9_8	GTAAGTGTCGTGTATGGAGGCGG	3
CTR9	CTR9_9	TGACTTCGATCAGTTACCGGAGG	266
CTR9	CTR9_10	GCACATATGGATTGCTTTGGCGG	327
CXXC1	CXXC1_1	AGCGGAGATATGGTAAGTAGCGG	367
CXXC1	CXXC1_2	GGTAAGTAGCGGGTCCAGGGAGG	336
CXXC1	CXXC1_3	TAATGGGGGTGTCCTGCAGGAGG	380
CXXC1	CXXC1_4	AGAGCCTCCAGATGCCGGGGAGG	247
CXXC1	CXXC1_5	CTGTCCTCCCCGGCATCTGGAGG	415
CXXC1	CXXC1_6	GGACAGCAAGTCCGAGAATGGGG	312
CXXC1	CXXC1_7	AGCAGTTGATGTCCGGTTTGCGG	503
CXXC1	CXXC1_8	ACTGCTTCATGATGTGAGCGCGG	300
CXXC1	CXXC1_9	GTGAGCGCGGGAGAGATGGGCGG	3
CXXC1	CXXC1_10	GCCTGCCCCATCCTCTGCAGCGG	798
CXXC4	CXXC4_1	TGGTGCAGGGGGGGAAGAAGGGG	312
CXXC4	CXXC4_2	TGGTGTTCATGGTGCAGGGGGGG	448
CXXC4	CXXC4_3	ATTGGTGTTCATGGTGCAGGGGG	331
CXXC4	CXXC4_4	CATTGGTGTTCATGGTGCAGGGG	418
CXXC4	CXXC4_5	CATGAACACCAATGTCTGCGTGG	157
CXXC4	CXXC4_6	GCTTTCCTTGGGCAAGCCCGGGG	197
CXXC4	CXXC4_7	CAAGGAAAGCCACTTGCCCGAGG	354
CXXC4	CXXC4_8	TCAGAGCCCCCTCGGGCAAGTGG	319
CXXC4	CXXC4_9	GTTGGTCTTGTAGAAGGAGGTGG	1
CXXC4	CXXC4_10	CCCGTTGGTCTTGTAGAAGGAGG	361
CXXC5	CXXC5_1	GGCTCGACATGGTGGGGCCGAGG	301
CXXC5	CXXC5_2	CGCCGAGGCTCGACATGGTGGGG	668
CXXC5	CXXC5_3	CCCACCATGTCGAGCCTCGGCGG	306
CXXC5	CXXC5_4	ACCGCCGAGGCTCGACATGGTGG	567
CXXC5	CXXC5_5	ACCATGTCGAGCCTCGGCGGTGG	403
CXXC5	CXXC5_6	GGTGGCTCCCAGGATGCCGGCGG	319
CXXC5	CXXC5_7	AGCAGCACCAATGGCAGCGGTGG	306
CXXC5	CXXC5_8	ACCAATGGCAGCGGTGGCAGTGG	404
CXXC5	CXXC5_9	AGCAGCAGACAAGAGTGCAGTGG	677
CXXC5	CXXC5_10	TGCCGCCGCACCAGCCTCAGTGG	648
DCAF4	DCAF4_1	AGAAGACAGACGGAAAAAGGTGG	278
DCAF4	DCAF4_2	ATCTGCCTGGAGAAGGGAAGGGG	286
DCAF4	DCAF4_3	GTGAACGATGTTAAAGTTGGAGG	3
DCAF4	DCAF4_4	CATGAACACCTTGAGCGTAGGGG	331
DCAF4	DCAF4_5	CACACCGAATTCACCTGGTGAGG	498
DCAF4	DCAF4_6	CTGCCAAAGGATACAGAATGTGG	170
DCAF4	DCAF4_7	CAGTGATGCTGGGAGCAGGGTGG	277
DCAF4	DCAF4_8	GCCGGTCTATTCCTGCTAAGGGG	315
DCAF4	DCAF4_9	CTCCGCCAGGCTTGTCTCGGCGG	454
DCAF4	DCAF4_10	ACCCGCCGAGACAAGCCTGGCGG	284
DDX59	DDX59_1	TGATGATGGCAAAAGTTGTGTGG	272
DDX59	DDX59_2	GCTGATGTGCCTGTCTATTGTGG	461
DDX59	DDX59_3	ACAGCGCTGGGCAGAACCAGGGG	325
DDX59	DDX59_4	TAGACATAGGAAGCATTCAGTGG	271
DDX59	DDX59_5	TGAACATTGTAGTCTCCCTGAGG	246
DDX59	DDX59_6	CTTGAAGAAATCAGGCTATGAGG	207
DDX59	DDX59_7	TATCATGCGAGCTTTATTCGAGG	446
DDX59	DDX59_8	AGAAGCACAGTTTTCATGCGTGG	217
DDX59	DDX59_9	GAAAACTGTGCTTCTTGTAGGGG	157
DDX59	DDX59_10	AAAACTGTGCTTCTTGTAGGGGG	175
DMAP1	DMAP1_1	GCCATCGCGCCTGAGAGATGGGG	293
DMAP1	DMAP1_2	AGGCGCGATGGCTACGGGCGCGG	682
DMAP1	DMAP1_3	CGGGACATTCTAGAACTCGGGGG	308
DMAP1	DMAP1_4	AGAACTCGGGGGTCCAGAAGGGG	307
DMAP1	DMAP1_5	CAACCCGGACAAGGTAGCAGGGG	311
DMAP1	DMAP1_6	CTTGAAAGTCAGTGTCTCAGAGG	388
DMAP1	DMAP1_7	CTGAGACACTGACTTTCAAGAGG	341
DMAP1	DMAP1_8	ACTGACTTTCAAGAGGCCCGAGG	222
DMAP1	DMAP1_9	GGGGTGCATCCCTGGCAGGGAGG	412
DMAP1	DMAP1_10	AGTGTCACTGGGTAGCAGTGGGG	279
DNMT1	DNMT1_1	CTCGGAGGCTTCAGCAGACGCGG	200
DNMT1	DNMT1_2	GGTACGCGCCGGCATCTCGGAGG	370
DNMT1	DNMT1_3	GATGGCCGGGACGGCCAGTGTGG	171
DNMT1	DNMT1_4	TGCCCGACGATGTCCGCAGGCGG	356
DNMT1	DNMT1_5	CCCATGGTACCTACCGCCTGCGG	241
DNMT1	DNMT1_6	CGCAGGCGGTAGGTACCATGGGG	331
DNMT1	DNMT1_7	GCAGGCGGTAGGTACCATGGGGG	404
DNMT1	DNMT1_8	CAGGCGGTAGGTACCATGGGGGG	284
DNMT1	DNMT1_9	AGGCGGTAGGTACCATGGGGGGG	237
DNMT1	DNMT1_10	TCCAAATCTTTGAGCCTGGGAGG	150
DNMT3A	DNMT3A_1|NM_022552	ATGCCCGCCATGCCCTCCAGCGG	661
DNMT3A	DNMT3A_1|NM_175629	ATGCCCGCCATGCCCTCCAGCGG	649
DNMT3A	DNMT3A_1|NM_175630	ATGCCCGCCATGCCCTCCAGCGG	619
DNMT3A	DNMT3A_1|NM_153759	TGTGAGAAGGAATGGGCGCGTGG	438
DNMT3A	DNMT3A_2|NM_022552	CAGCTCTGCTGCGGAGCGGGAGG	104
DNMT3A	DNMT3A_2|NM_175629	CAGCTCTGCTGCGGAGCGGGAGG	90
DNMT3A	DNMT3A_2|NM_175630	CAGCTCTGCTGCGGAGCGGGAGG	112
DNMT3A	DNMT3A_2|NM_153759	GTGATACGGTGAAAGGATGGAGG	9
DNMT3A	DNMT3A_3|NM_153759	GGAAGAAAACCAGGGGCCCGGGG	177
DNMT3A	DNMT3A_3|NM_022552	GAGGACCGAAAGGTGAGCAGCGG	373
DNMT3A	DNMT3A_3|NM_175629	GAGGACCGAAAGGTGAGCAGCGG	360
DNMT3A	DNMT3A_3|NM_175630	GAGGACCGAAAGGTGAGCAGCGG	355
DNMT3A	DNMT3A_4|NM_153759	GCCCGGGGAGTCTCAGAAGGTGG	269
DNMT3A	DNMT3A_4|NM_022552	GTGAGCAGCGGGCTCTGCTGGGG	1
DNMT3A	DNMT3A_4|NM_175629	GTGAGCAGCGGGCTCTGCTGGGG	9
DNMT3A	DNMT3A_4|NM_175630	GTGAGCAGCGGGCTCTGCTGGGG	7
DNMT3A	DNMT3A_5|NM_153759	AGGCGTGGTAGCCACAGTGGGGG	366
DNMT3A	DNMT3A_5|NM_022552	TCTGTGCCTGCAGGACGGAGAGG	250
DNMT3A	DNMT3A_5|NM_175629	TCTGTGCCTGCAGGACGGAGAGG	214
DNMT3A	DNMT3A_5|NM_175630	TCTGTGCCTGCAGGACGGAGAGG	247
DNMT3A	DNMT3A_6|NM_153759	CAGGCGTGGTAGCCACAGTGGGG	348
DNMT3A	DNMT3A_6|NM_022552	TGGCGCTCCTCCTTGCCACGCGG	333
DNMT3A	DNMT3A_6|NM_175629	TGGCGCTCCTCCTTGCCACGCGG	342
DNMT3A	DNMT3A_6|NM_175630	TGGCGCTCCTCCTTGCCACGCGG	341
DNMT3A	DNMT3A_7|NM_022552	CAGCACCACGGCACGGAAGGTGG	453
DNMT3A	DNMT3A_7|NM_175629	CAGCACCACGGCACGGAAGGTGG	489
DNMT3A	DNMT3A_7|NM_175630	CAGCACCACGGCACGGAAGGTGG	449
DNMT3A	DNMT3A_7|NM_153759	GGCTACCACGCCTGAGCCCGTGG	181
DNMT3A	DNMT3A_8|NM_153759	CTACCACGCCTGAGCCCGTGGGG	380
DNMT3A	DNMT3A_8|NM_022552	GCACCACGGCACGGAAGGTGGGG	466
DNMT3A	DNMT3A_8|NM_175629	GCACCACGGCACGGAAGGTGGGG	494
DNMT3A	DNMT3A_8|NM_175630	GCACCACGGCACGGAAGGTGGGG	487
DNMT3A	DNMT3A_9|NM_153759	GCCCGTGGGGTCCGATGCTGGGG	370
DNMT3A	DNMT3A_9|NM_022552	CCGCCCCACCTTCCGTGCCGTGG	480
DNMT3A	DNMT3A_9|NM_175629	CCGCCCCACCTTCCGTGCCGTGG	503
DNMT3A	DNMT3A_9|NM_175630	CCGCCCCACCTTCCGTGCCGTGG	492
DNMT3A	DNMT3A_10|NM_022552	AGGATGTGACACTCACCGGGGGG	302
DNMT3A	DNMT3A_10|NM_175629	AGGATGTGACACTCACCGGGGGG	365
DNMT3A	DNMT3A_10|NM_175630	AGGATGTGACACTCACCGGGGGG	326
DNMT3A	DNMT3A_10|NM_153759	CTCGTCATCGCCTGCTTTGGTGG	296
DNMT3B	DNMT3B_1	CAGGCATCTCAATGGAGAGGAGG	352
DNMT3B	DNMT3B_2	AATGGAGAGGAGGACGCCGGCGG	514
DNMT3B	DNMT3B_3	AGACTCGATCCTCGTCAACGGGG	297
DNMT3B	DNMT3B_4	CGCTGCAGGCCCCGTTGACGAGG	387
DNMT3B	DNMT3B_5	CAGGATTGGGGGCGAGTCGGAGG	417
DNMT3B	DNMT3B_6	CGACTCGCCCCCAATCCTGGAGG	316
DNMT3B	DNMT3B_7	GCGGATAGCCTCCAGGATTGGGG	220
DNMT3B	DNMT3B_8	ATCCGCACCCCGGAGATCAGAGG	361
DNMT3B	DNMT3B_9	CACCTCTGATCTCCGGGGTGCGG	350
DNMT3B	DNMT3B_10	CGCACCCCGGAGATCAGAGGTGG	337
DNMT3L	DNMT3L_1	CTGACACAGCATCCCCATGGCGG	301
DNMT3L	DNMT3L_2	GGGCTGGGATGGCCGCCATGGGG	182
DNMT3L	DNMT3L_3	GTTTCACCCGGGACAGGCAGAGG	0
DNMT3L	DNMT3L_4	TTAGACATCTGCATCTGCTGCGG	320
DNMT3L	DNMT3L_5	CACACAGCACCCTCTGTTTGAGG	353
DNMT3L	DNMT3L_6	CTCCCTGCCTACCTTACATGGGG	486
DNMT3L	DNMT3L_7	TAAGGTAGGCAGGGAGGCTGGGG	525
DNMT3L	DNMT3L_8	CGTCATCGTCGTACAGGAAGAGG	503
DNMT3L	DNMT3L_9	GGAGAGACGCTGCTCATCTGCGG	269
DNMT3L	DNMT3L_10	AACCCTGATTGCACCCGGTGAGG	451
DOT1L	DOT1L_1	GCTGAGACTGAAGTCGCCCGTGG	166
DOT1L	DOT1L_2	TGAGACTGAAGTCGCCCGTGGGG	490
DOT1L	DOT1L_3	GAGACTGAAGTCGCCCGTGGGGG	282
DOT1L	DOT1L_4	CTGAGCCCGCCGTCTACCCGTGG	320
DOT1L	DOT1L_5	CAGCGGCCACGGGTAGACGGCGG	492
DOT1L	DOT1L_6	GCACTCACGTAGACCGGCAGCGG	340
DOT1L	DOT1L_7	TCAGCTTCGAGAGCATGCAGAGG	322
DOT1L	DOT1L_8	GCAAGCCACCTACCAGCTGGTGG	337
DOT1L	DOT1L_9	GGGCCACCCTCCGTCCGCAGTGG	373
DOT1L	DOT1L_10	CTTCCACTGCGGACGGAGGGTGG	331
DPF1	DPF1_1	TGGATGGAGAAGACCCACCGCGG	0
DPF1	DPF1_2	GTACGTGTAAATCTGTCCCGGGG	1
DPF1	DPF1_3	CGTACCCCGCCCGCTGTTGGAGG	602
DPF1	DPF1_4	TCTTCCTCCAACAGCGGGCGGGG	294
DPF1	DPF1_5	TTTCTTCCTCCAACAGCGGGCGG	192
DPF1	DPF1_6	TCCGTTTCTTCCTCCAACAGCGG	421
DPF1	DPF1_7	ACGGAGACTCAACATCCTGGAGG	311
DPF1	DPF1_8	ACTCGCAGGGCCTGAGTCTGGGG	445
DPF1	DPF1_9	ATCGGTGGGTGCAGCCGCTGGGG	421
DPF1	DPF1_10	AGTCTGGGGACAGGGCCATGGGG	369
DPF2	DPF2_1	AACAGGGAAGATGGCGGCTGTGG	326
DPF2	DPF2_2	GCACGCTGCGCTCAGCACAGAGG	344
DPF2	DPF2_3	TGGATGGAAAAGCGACACCGGGG	0
DPF2	DPF2_4	GCGACACCGGGGTCCAGGTGAGG	402
DPF2	DPF2_5	CTGTCCGGAGGCCAATCCTGTGG	208
DPF2	DPF2_6	GTAGGAGTACAGCTGTCCGGAGG	1
DPF2	DPF2_7	GCGGCGAGCCCATCCCCCTGAGG	299
DPF2	DPF2_8	GAAAGTCGTGGATCCTCAGGGGG	378
DPF2	DPF2_9	GGAAAGTCGTGGATCCTCAGGGG	281
DPF2	DPF2_10	ATAGATGGGAAGGAAAGTCGTGG	282
DPF3	DPF3_1	CTCTGACTCTGGCAGGCTCGGGG	209
DPF3	DPF3_2	CTTCCTGGACTCACAGACTGGGG	323
DPF3	DPF3_3	TGGATGGAGAAGAGGCACCGAGG	0
DPF3	DPF3_4	GTATGTATACAGCTGGCCCGGGG	8
DPF3	DPF3_5	GTCTCTTCTTGCGCCAGCAGCGG	4
DPF3	DPF3_6	CGCAGTTTTGGATCTTCAGGTGG	368
DPF3	DPF3_7	CACCTGAAGATCCAAAACTGCGG	276
DPF3	DPF3_8	GTGAACCCATCCTTCTTCAGGGG	20
DPF3	DPF3_9	TTCCAGCGTGGTGCTCTCTGAGG	288
DPF3	DPF3_10	ACGGAGCAAGGCTTCCAGCGTGG	210
DPY30	DPY30_1	CATCTGCTCTGGCTCCATGGCGG	250
DPY30	DPY30_2	GGACAAACGCAGGTATCAGGAGG	427
DPY30	DPY30_3	ACGCAGGTATCAGGAGGCCGTGG	441
DPY30	DPY30_4	GTGAGACCGTACTCAGAGTGAGG	12
DPY30	DPY30_5	CGGTCTCACAGACAACGTTGAGG	233
DPY30	DPY30_6	GGAGCCAGAGCAGATGCTGGAGG	183
DPY30	DPY30_7	GTGACTTGCAGGGTCCGCCATGG	7
DPY30	DPY30_8	CAGCATCTGCTCTGGCTCCATGG	282
DPY30	DPY30_9	GAGCCAGAGCAGATGCTGGAGGG	304
DPY30	DPY30_10	GAGGGACAAACGCAGGTATCAGG	339
DR1	DR1_1	ATCATCATCGTTGCCAGACGAGG	368
DR1	DR1_2	TTTTATTGATAGCAGCTCTGGGG	256
DR1	DR1_3	GACTCTTCCTAATGTCCGGGTGG	111
DR1	DR1_4	CAACGATGCTCGAGAGCTGGTGG	344
DR1	DR1_5	CTGATTAGATGCACTGGCTGAGG	266
DR1	DR1_6	AGCCAGTGCATCTAATCAGGCGG	270
DR1	DR1_7	CGAGAAACAGGAAGGTACTATGG	279
DR1	DR1_8	GGTACTATGGCTTCCTCGTCTGG	291
DR1	DR1_9	AAGAGACTCTTCCTAATGTCCGG	245
DR1	DR1_10	AGAGACTCTTCCTAATGTCCGGG	358
DZIP3	DZIP3_1	TTAAAATAGGCATCCTGCTGTGG	181
DZIP3	DZIP3_2	AAATAGGCATCCTGCTGTGGAGG	716
DZIP3	DZIP3_3	ATCCTGCTGTGGAGGATCAGAGG	305
DZIP3	DZIP3_4	TTAGCTGCAACTTCTCTCTGTGG	346
DZIP3	DZIP3_5	GGAGTAGCACTCACTGAAAGAGG	297
DZIP3	DZIP3_6	TACTGCGATGTGCTCAAAAGAGG	293
DZIP3	DZIP3_7	ACTTCAAACTGCAAGTAATGGGG	242
DZIP3	DZIP3_8	TGGACCAATCATCCTTTGGGTGG	347
DZIP3	DZIP3_9	TGCGGTAACTCCTTGTTAGGAGG	380
DZIP3	DZIP3_10	AAGTCAAACTGTTTGGATTGCGG	212
E2F6	E2F6_1	GCTAGTGTAAAACTCAGTCAAGG	229
E2F6	E2F6_2	GTTCCAGCTCCCAGAGAAGTAGG	1
E2F6	E2F6_3	GCAGGGTTACCTACTTCTCTGGG	289
E2F6	E2F6_4	TGCAGGGTTACCTACTTCTCTGG	408
E2F6	E2F6_5	CGATTCCTGTGTCCTTTGCTAGG	375
E2F6	E2F6_6	AGAGTCCTAGCAAAGGACACAGG	365
E2F6	E2F6_7	CTGTGATAGAGTCCTAGCAAAGG	207
E2F6	E2F6_8	TTACCTTCCTCAGGGCCTTCTGG	412
E2F6	E2F6_9	TGGTATATTTACCTTCCTCAGGG	221
E2F6	E2F6_10	CTGGTATATTTACCTTCCTCAGG	247
EAF1	EAF1_1	GCGGTCCAGCAGCGGGTTTGCGG	359
EAF1	EAF1_2	AAACCCGCTGCTGGACCGCGAGG	582
EAF1	EAF1_3	TGTTCCTCGCGGTCCAGCAGCGG	386
EAF1	EAF1_4	ACCGCGAGGAACATTGCCTGAGG	300
EAF1	EAF1_5	GCCTCAGGCAATGTTCCTCGCGG	333
EAF1	EAF1_6	GGAACATTGCCTGAGGCTCGGGG	329
EAF1	EAF1_7	AGAGCTTCGAGAAGCGGCCGCGG	125
EAF1	EAF1_8	ATAGTGTGGAAGGAGGCCCGCGG	346
EAF1	EAF1_9	ACAACGAATAGTGTGGAAGGAGG	408
EAF1	EAF1_10	CTGACTTACAACGAATAGTGTGG	313
EAF2	EAF2_1	AGTAATTATGAATAGCGCAGCGG	301
EAF2	EAF2_2	CACACCTAGACCGTCGCGAGCGG	453
EAF2	EAF2_3	CGAGCGGGTTCTCAAGTTAGGGG	426
EAF2	EAF2_4	ACAGTGTGGAAGGCGCAGCGCGG	331
EAF2	EAF2_5	CTCACTCACAGCGCACAGTGTGG	585
EAF2	EAF2_6	CTGTGAGTGAGGACCATCCGGGG	286
EAF2	EAF2_7	TTCTTCTGAAGGATACCTTGAGG	246
EAF2	EAF2_8	ATCATCTATTGGAGATGCTGGGG	289
EAF2	EAF2_9	ATTCCCTGTATCAGAAGTAGAGG	356
EAF2	EAF2_10	CACACTGTGCGCTGTGAGTGAGG	203
EED	EED_1	GGCGGAGGAATATGTCCGAGAGG	253
EED	EED_2	GGAAGTGTCGACTGCGCCGGCGG	384
EED	EED_3	GGCGGGAACAGACATGCCTGCGG	362
EED	EED_4	TTACATTCTCGTCTCCAGAGAGG	335
EED	EED_5	CATCCTGTAAGCAGTAAATGAGG	440
EED	EED_6	GACGCTGTCAGTATAGAAAGTGG	283
EED	EED_7	GATCCAGCTACAGCCAGCAGAGG	357
EED	EED_8	CTGGCTGTAGCTGGATCTAGAGG	163
EED	EED_9	TATCCAGACGGACACTCTGGTGG	260
EED	EED_10	CCGGTTGTTGCAATCTTACGTGG	186
EHMT1	EHMT1_1	CATGGCCGCCGCCGATGCCGAGG	297
EHMT1	EHMT1_2	GCTCACCTCGGCATCGGCGGCGG	221
EHMT1	EHMT1_3	GCTGCTCACCTCGGCATCGGCGG	442
EHMT1	EHMT1_4	GCCGATGCCGAGGTGAGCAGCGG	442
EHMT1	EHMT1_5	CGATGCCGAGGTGAGCAGCGGGG	214
EHMT1	EHMT1_6	TCTAACAGGCAGTTCCGGCGAGG	319
EHMT1	EHMT1_7	AACAGGCAGTTCCGGCGAGGGGG	410
EHMT1	EHMT1_8	ACAGGCAGTTCCGGCGAGGGGGG	515
EHMT1	EHMT1_9	GGTGAGGGCGGTGTGCACCGAGG	0
EHMT1	EHMT1_10	AGGAGAGGCCCACATGGCTGCGG	338
EHMT2	EHMT2_1	AGGGAGTCGGGGTTGGCCTTGGG	196
EHMT2	EHMT2_2	TGTGGCATGGCCTAGAAAACAGG	250
EHMT2	EHMT2_3	CAGAGGAGTTAGGTTCTGCCCGG	274
EHMT2	EHMT2_4	CAGGGAGTCGGGGTTGGCCTTGG	263
EHMT2	EHMT2_5	CAAGGCCAACCCCGACTCCCTGG	418
EHMT2	EHMT2_6	CTAGAAAACAGGCAAGCAAAAGG	87
EHMT2	EHMT2_7	AGGCTCCAGGGAGTCGGGGTTGG	187
EHMT2	EHMT2_8	CTTTTGCTTGCCTGTTTTCTAGG	98
EHMT2	EHMT2_9	CTGGGAGCAGGGAAACGACATGG	184
EHMT2	EHMT2_10	GTCGGGGTTGGCCTTGGGCAGGG	17
ELL	ELL_1	GAGAGATGGTCGCAAGATGGCGG	432
ELL	ELL_2	AGGAGCTACGGGCTGTCGTGCGG	398
ELL	ELL_3	CACTGTCGGTGAGCTTCACGTGG	462
ELL	ELL_4	AGCTCACCGACAGTGCCCTGAGG	357
ELL	ELL_5	TACCGCGCCAGACAGGTGAGTGG	303
ELL	ELL_6	TGCCACTCACCTGTCTGGCGCGG	448
ELL	ELL_7	TGTGCTGCGTGGAGGGGGAGGGG	429
ELL	ELL_8	GATGGAGATGTGCTGCGTGGAGG	605
ELL	ELL_9	GGGGATGGAGATGTGCTGCGTGG	368
ELL	ELL_10	CTGACTGCCCCGCAGAGGCGCGG	129
ELL2	ELL2_1	CCGCCATCTTAAACTCCCCGGGG	220
ELL2	ELL2_2	CGGGGAGTTTAAGATGGCGGCGG	398
ELL2	ELL2_3	GGGAGTTTAAGATGGCGGCGGGG	339
ELL2	ELL2_4	GGAGTTTAAGATGGCGGCGGGGG	352
ELL2	ELL2_5	CGGCCGGCCCGCTCACCTTGTGG	457
ELL2	ELL2_6	CAATAAGAGTACTCACCCCGTGG	408
ELL2	ELL2_7	GAGCAATTCTGCAACAGGTGAGG	318
ELL2	ELL2_8	CAGATTGGCTACCTAGTATGAGG	272
ELL2	ELL2_9	CCAAAAGCCGTTTCTAGGGGAGG	148
ELL2	ELL2_10	AATCCAAAAGCCGTTTCTAGGGG	72
ELL3	ELL3_1	ACTCGAACTCGTCGCCATGGAGG	495
ELL3	ELL3_2	GAGCTCCAGGAGCCTCTGAGAGG	125
ELL3	ELL3_3	AGCCGGAGCTGTCCTCTCAGAGG	470
ELL3	ELL3_4	CGTTGAGCCTGAGCAGTAAGAGG	407
ELL3	ELL3_5	GGCTCAACGACGCTGCCCTGCGG	388
ELL3	ELL3_6	GGGCGCTGCAAGAGTGTCAGCGG	346
ELL3	ELL3_7	AATCACCGGCCGTACCTGCGGGG	421
ELL3	ELL3_8	GCAATCACCGGCCGTACCTGCGG	410
ELL3	ELL3_9	TGCTTTCCAAGGCCACCGAGGGG	347
ELL3	ELL3_10	AGCTCGCACTTACCCCTCGGTGG	272
ENY2	ENY2_1	CTTTGTTCATCTTGCTAACCTGG	366
ENY2	ENY2_2	TGGCTGGAAGGATCAGTTGAAGG	373
ENY2	ENY2_3	CAGTTGAAGGCACACTGTAAAGG	174
ENY2	ENY2_4	CACTCCAAAAGGCAGAGGTAAGG	234
ENY2	ENY2_5	TATTCCTTACCTCTGCCTTTTGG	441
ENY2	ENY2_6	AAAGGCTGGCATGCTGAGCAAGG	485
ENY2	ENY2_7	TAGAAACTGGAGAAAGAGAACGG	222
ENY2	ENY2_8	ACACGTTACTGTTGATGACTTGG	427
ENY2	ENY2_9	CGTTACTGTTGATGACTTGGTGG	382
ENY2	ENY2_10	GAAATCACTCCAAAAGGCAGAGG	274
EP300	EP300_1	AAAAATGGCCGAGAATGTGGTGG	235
EP300	EP300_2	CCGAGAATGTGGTGGAACCGGGG	4
EP300	EP300_3	CGGGGCCGCCTTCAGCCAAGCGG	513
EP300	EP300_4	TTAGGCCGCTTGGCTGAAGGCGG	374
EP300	EP300_5	CATCGCTGGCGGACGCCGAGAGG	269
EP300	EP300_6	CTAACCTGTGCCATCGCTGGCGG	424
EP300	EP300_7	GAATTGGGACTAACCAATGGTGG	263
EP300	EP300_8	GCTTGACTTCTCCCAACATGGGG	468
EP300	EP300_9	AACATGGGGATGGGCACTAGTGG	369
EP300	EP300_10	TACTTACCTTAAGAGGCTGGGGG	327
EP400	EP400_1	GCTGATGCTGGACGTTCTGGGGG	372
EP400	EP400_2	AGCTGATGCTGGACGTTCTGGGG	472
EP400	EP400_3	ACGTCCAGCATCAGCTGCAGAGG	325
EP400	EP400_4	GGGTGCCGACGGGCTTGCTGAGG	434
EP400	EP400_5	GAACATCACCCTGCAGAGCGTGG	272
EP400	EP400_6	GAGCGTGGGCCCTGTCGTCGGGG	418
EP400	EP400_7	AGCGTGGGCCCTGTCGTCGGGGG	430
EP400	EP400_8	ATCTGAGGTTATCAATGACGAGG	194
EP400	EP400_9	CTGCTACCAGGCTCCCTGCGAGG	246
EP400	EP400_10	CGCAGGGAGCCTGGTAGCAGGGG	375
EPC1	EPC1_1	TATGGTTATACCGGTCCCAGAGG	1
EPC1	EPC1_2	CTATGAGTCTATATATCCTGGGG	199
EPC1	EPC1_3	GACCGCCTAGAAAAAGGCAGTGG	293
EPC1	EPC1_4	GACCACTGCCTTTTTCTAGGCGG	236
EPC1	EPC1_5	CAGCACAAATGATCCTTATGTGG	280
EPC1	EPC1_6	CAATGGAGAGATCATGTCTGAGG	482
EPC1	EPC1_7	CGTCTGTTGGGGAGTAGCAGCGG	413
EPC1	EPC1_8	GCAGCAGGACTCGTCTGTTGGGG	531
EPC1	EPC1_9	TGTATTTGTACCTGGGAGAGAGG	280
EPC1	EPC1_10	GTCTGGCTCTTCGGAAGCTGAGG	1
ERCC6	ERCC6_1	TCCTGAGTTTGACTTGAGTGGGG	371
ERCC6	ERCC6_2	GCAATCAAGCAAGAAAGTGGTGG	239
ERCC6	ERCC6_3	GGCTGTCCACCTCTGCTGTGGGG	454
ERCC6	ERCC6_4	TGCGCACCCCACAGCAGAGGTGG	355
ERCC6	ERCC6_5	TGATGCGCACCCCACAGCAGAGG	620
ERCC6	ERCC6_6	GCATCAGCAGCTCCGAGGAGAGG	263
ERCC6	ERCC6_7	TGAGCTGCAGGGTTTGGGTGTGG	438
ERCC6	ERCC6_8	GGTGGACAATGCCATCCATGAGG	378
ERCC6	ERCC6_9	TGCCTCCCAGCTCGTTGACGTGG	499
ERCC6	ERCC6_10	CTCCACGTCAACGAGCTGGGAGG	279
EZH1	EZH1_1	AGTGATACATTTGGAGGTAGGGG	347
EZH1	EZH1_2	CCAGTAAGTGATACATTTGGAGG	274
EZH1	EZH1_3	GCTTTGCTAGGCTTTGTATGTGG	181
EZH1	EZH1_4	CAGTCAATGAAGCCTGTGAGTGG	312
EZH1	EZH1_5	CATAAAGTTCTGTTGGAGAGGGG	177
EZH1	EZH1_6	ACCATAAAGTTCTGTTGGAGAGG	202
EZH1	EZH1_7	GGTATGTATTGAAAGCACTGTGG	178
EZH1	EZH1_8	GGGATCATCTCTGAAACATGAGG	181
EZH1	EZH1_9	GAATCAGTACTCAGATGAGGAGG	306
EZH1	EZH1_10	GTCATCCTGCTTTCCATCTGAGG	0
EZH2	EZH2_1	TGCGACTGAGACAGCTCAAGAGG	493
EZH2	EZH2_2	TTATGATGGGAAAGTACACGGGG	146
EZH2	EZH2_3	GGGAAAGTACACGGGGATAGAGG	222
EZH2	EZH2_4	AAGGAAATTTCCGAGGTGGGCGG	170
EZH2	EZH2_5	TCAGAAGGAAATTTCCGAGGTGG	278
EZH2	EZH2_6	GCCCTTATCTGGAAACATTGAGG	269
EZH2	EZH2_7	ATGTTGGGGGTACATTCAGGAGG	309
EZH2	EZH2_8	ATTTGGTCCATCTATGTTGGGGG	403
EZH2	EZH2_9	CATTTGGTCCATCTATGTTGGGG	292
EZH2	EZH2_10	CAACACCCAACACTTATAAGCGG	255
FANCL	FANCL_1	CTCCGGACTTCGAGCCATGGCGG	387
FANCL	FANCL_2	CGGTTCTGGGGCAGAAGCAGGGG	220
FANCL	FANCL_3	ACGGTTTTCGACCGGTTCTGGGG	1
FANCL	FANCL_4	CGGCTCAGGTACCCGCCCAGTGG	372
FANCL	FANCL_5	CAGCTGAGAACAATACTTAGTGG	338
FANCL	FANCL_6	AGGCTTGAGTAGAACTGGGGAGG	296
FANCL	FANCL_7	TACACAAGTCTGGTGAGCAGAGG	368
FANCL	FANCL_8	GCTCACCAGACTTGTGTATGCGG	244
FANCL	FANCL_9	ATTTACCTGAGGTGTCCAGGAGG	291
FANCL	FANCL_10	CGTGCTGTTGCACTCCGTGGAGG	480
FBXL19	FBXL19_1	AGAAGCTAGAGCGTTTCAAGCGG	95
FBXL19	FBXL19_2	TTCGGGCACATCGCTGAGTGAGG	455
FBXL19	FBXL19_3	TGAGGACGAAGCCCCCGGCGAGG	250
FBXL19	FBXL19_4	TCTGGCGAGAAGGAGAACCGTGG	1
FBXL19	FBXL19_5	TGGCGAGAAGGAGAACCGTGGGG	349
FBXL19	FBXL19_6	GGCGAGAAGGAGAACCGTGGGGG	358
FBXL19	FBXL19_7	GCGAGAAGGAGAACCGTGGGGGG	231
FBXL19	FBXL19_8	AGAAGGAGAACCGTGGGGGGCGG	222
FBXL19	FBXL19_9	AGGAGAACCGTGGGGGGCGGCGG	289
FBXL19	FBXL19_10	CGCTCCAGCTGTGGAGGCCGGGG	270
FBXO10	FBXO10_1	TAGGTGACCATGGAGGCTGGTGG	448
FBXO10	FBXO10_2	TGCGCCACAGCTCCAAGGGGAGG	304
FBXO10	FBXO10_3	TCATGCGCCACAGCTCCAAGGGG	487
FBXO10	FBXO10_4	CCCTGCATACCAGGCTGCAGCGG	233
FBXO10	FBXO10_5	AGCGGGTGCTGTCGAGACTGAGG	266
FBXO10	FBXO10_6	GTCTCGACAGCACCCGCTGGCGG	3
FBXO10	FBXO10_7	CCAGACACAGCTGCCGCCAGCGG	308
FBXO10	FBXO10_8	GGTTGGGCCAATTGGGATGGCGG	378
FBXO10	FBXO10_9	TTGGCCCAACCAGCCAGATGTGG	346
FBXO10	FBXO10_10	GCTTTTCTCTATTCCGCCGGAGG	325
FBXO11	FBXO11_1	GATCTATCAGGTATTTCCTGTGG	188
FBXO11	FBXO11_2	GGAGAAACTGCCAGATGAAGTGG	171
FBXO11	FBXO11_3	ACTATTGAAGATGCCCTTGGTGG	360
FBXO11	FBXO11_4	TATTGAAGATGCCCTTGGTGGGG	444
FBXO11	FBXO11_5	TGCCCTTGGTGGGGTACAAGAGG	336
FBXO11	FBXO11_6	TGCCACTTTCCCAGGTGCTGTGG	409
FBXO11	FBXO11_7	GGTTCTGCAGTATGTGTTAGTGG	325
FBXO11	FBXO11_8	GATGTTACAGTGCTTGATGGTGG	482
FBXO11	FBXO11_9	AGCCTATGCTAACCCTACAGTGG	295
FBXO11	FBXO11_10	ATTCACCATGGGCAGACTGGAGG	318
FXR1	FXR1_1	ATCTTCATCTAGCTCAATGGCGG	167
FXR1	FXR1_2	ATCAGCACTCTGTAGATGAGGGG	326
FXR1	FXR1_3	GCATCAGCACTCTGTAGATGAGG	153
FXR1	FXR1_4	CAAGGTTCTAGGTCTTATAGCGG	121
FXR1	FXR1_5	GCTCAGATTCCGTTTCAGAGGGG	308
FXR1	FXR1_6	ACGCTCAGATTCCGTTTCAGAGG	314
FXR1	FXR1_7	AAGACTACCAGAACTGATGGAGG	202
FXR1	FXR1_8	GAGCACTATATTCATGTCAGAGG	192
FXR1	FXR1_9	ACAGTACTAACCGTCGTAGGCGG	263
FXR1	FXR1_10	GCTTATGTCCAGAAATGAAGAGG	232
FXR2	FXR2_1	ATGGGCGGCCTGGCCTCTGGGGG	365
FXR2	FXR2_2	GGAGCCGGGACTGCCCGTCGAGG	456
FXR2	FXR2_3	GGACTGCCCGTCGAGGTGCGCGG	417
FXR2	FXR2_4	CGAGGTGCGCGGCTCCAACGGGG	334
FXR2	FXR2_5	GTGAGACGGCGCGCCGACTGGGG	6
FXR2	FXR2_6	TGAGAGACAAATTCCTTTTGGGG	399
FXR2	FXR2_7	TTATTATAGTCAGCTGGAGGTGG	119
FXR2	FXR2_8	TCCTTATTATAGTCAGCTGGAGG	351
FXR2	FXR2_9	TAATAAGGAGATCACAGAAGGGG	361
FXR2	FXR2_10	GCCAATGAACAGGAACCTTGTGG	258
GATAD2A	GATAD2A_1	TCATTCTGAACTTGGGAGGGAGG	481
GATAD2A	GATAD2A_2	TCGGTCATTCTGAACTTGGGAGG	223
GATAD2A	GATAD2A_3	GCTTGAACGGGACCCAACAGAGG	299
GATAD2A	GATAD2A_4	GGACCCAACAGAGGACGATGTGG	349
GATAD2A	GATAD2A_5	TAAACACTGACGGAGACATGAGG	356
GATAD2A	GATAD2A_6	GCTGGTGGGCGATGGGCCCGTGG	283
GATAD2A	GATAD2A_7	GCGCACCTCACACAGGTGAGTGG	292
GATAD2A	GATAD2A_8	TCCTCCCACTCACCTGTGTGAGG	348
GATAD2A	GATAD2A_9	AGGTGAGTGGGAGGAGCCAGCGG	396
GATAD2A	GATAD2A_10	GACTTCATGTCACTGTGGGGTGG	319
GATAD2B	GATAD2B_1	TTCGCTTGAATCTGTTGAAGCGG	372
GATAD2B	GATAD2B_2	GGCAAAGCGACTCAAAATGGAGG	267
GATAD2B	GATAD2B_3	CAAAGCGACTCAAAATGGAGGGG	217
GATAD2B	GATAD2B_4	ACTCAAAATGGAGGGGCATGAGG	338
GATAD2B	GATAD2B_5	GAAGGATTTGGCAAATCTTGAGG	296
GATAD2B	GATAD2B_6	TGTTTGGTGGGTAACTCATGTGG	515
GATAD2B	GATAD2B_7	ACCACTGCCATCCTGTTTGGTGG	482
GATAD2B	GATAD2B_8	GCAGTCCTGTTGTCTCCATGAGG	555
GATAD2B	GATAD2B_9	AAACATCAATGATGAGCCTGTGG	180
GATAD2B	GATAD2B_10	TGGATATGAGTGCTAGACGGAGG	391
GLYR1	GLYR1_1	GTGGTTGGGTGGTAAGATGGCGG	1
GLYR1	GLYR1_2	AGATGGCGGCTGTGAGTCTGCGG	323
GLYR1	GLYR1_3	TGCGGCTCGGCGACTTGGTGTGG	594
GLYR1	GLYR1_4	CTTGGTGTGGTGAGTCCGAGCGG	275
GLYR1	GLYR1_5	ACTCTTTGTGTTTTCTCTAGGGG	126
GLYR1	GLYR1_6	CTCTTTGTGTTTTCTCTAGGGGG	222
GLYR1	GLYR1_7	AACAATCTGGAGGATAAAAGGGG	185
GLYR1	GLYR1_8	TTGGTGGATTAACAATCTGGAGG	254
GLYR1	GLYR1_9	CTTTCCCTTTGGCTCTCCTGAGG	370
GLYR1	GLYR1_10	GTGAGATCCTATAGAGGGAGGGG	6
GMPS	GMPS_1	TCCGTTGCACAGAGCCATCGGGG	277
GMPS	GMPS_2	CGGAGACTCCAAGGTCAGCGTGG	295
GMPS	GMPS_3	TTGCAGCTGGAGAATGCTGGAGG	328
GMPS	GMPS_4	CAACAGCTCCTTCATAGTGGTGG	340
GMPS	GMPS_5	TGACAACAGCTCCTTCATAGTGG	314
GMPS	GMPS_6	AAGTCATAGACCGAAGAGTGAGG	312
GMPS	GMPS_7	AGTGCTATTATCATCTCTGGAGG	262
GMPS	GMPS_8	AGCTGATGGATTCAAGGTTGTGG	289
GMPS	GMPS_9	CTGTAAGGCCAACTTCAGGGTGG	201
GMPS	GMPS_10	ACCCCGTAGGTTTTACTCAGTGG	190
GPS2	GPS2_1	CTTGGGGCGCTCCAGGAGTGCGG	301
GPS2	GPS2_2	ACCGGCACATTATGATGGAGCGG	450
GPS2	GPS2_3	TGATGGAGCGGGAGCGCAAGCGG	380
GPS2	GPS2_4	GCAAGCGGCAGGGTGAGCCGGGG	322
GPS2	GPS2_5	CATTCTGCCTGATTCTCCAGAGG	339
GPS2	GPS2_6	CTTCAGAATCTGGGATGGGGTGG	306
GPS2	GPS2_7	ATCCCAGATTCTGAAGTTGGAGG	430
GPS2	GPS2_8	ACTCTCACCGTAAGCACTTGGGG	366
GPS2	GPS2_9	TCCTTAGACCCGGCACTACGTGG	432
GPS2	GPS2_10	GCTCAGAGGTGAGTAATAGGAGG	223
GTF3C4	GTF3C4_1	TCATCTTCTCTCAGGTGCAGAGG	346
GTF3C4	GTF3C4_2	GAAGGAGCCAGCAGCGGACGCGG	381
GTF3C4	GTF3C4_3	GAATGCAGCGCTGGGCCCCGGGG	266
GTF3C4	GTF3C4_4	TCCGCCTCATGGTGACTCGGCGG	487
GTF3C4	GTF3C4_5	GCTCCCGCCGAGTCACCATGAGG	238
GTF3C4	GTF3C4_6	GGCCGTGAAGCTGCAGTATGCGG	564
GTF3C4	GTF3C4_7	AAGCTGCAGTATGCGGTGAGCGG	244
GTF3C4	GTF3C4_8	GGAACCGCTGGCTTGGTCCGAGG	269
GTF3C4	GTF3C4_9	TGGTCCTCGGACCAAGCCAGCGG	511
GTF3C4	GTF3C4_10	CACAGCGATGCTGCGGGCCGTGG	390
HAT1	HAT1_1	TTCCGAGCTACGATCACCCGCGG	373
HAT1	HAT1_2	TGATCGTAGCTCGGAAATGGCGG	361
HAT1	HAT1_3	GGTAGAATATAAGAGTGCAGTGG	320
HAT1	HAT1_4	GTATACCCATCAACTCTTTGGGG	0
HAT1	HAT1_5	TGAGAACTTTGACTGTGTAGAGG	261
HAT1	HAT1_6	TCTTTAGGCAGATGATGTTGAGG	335
HAT1	HAT1_7	GTGTTTGTGCAAAATCCAGGTGG	0
HAT1	HAT1_8	AACTGCTAGCTTTATTGACGTGG	181
HAT1	HAT1_9	ACTGCCAATTACCTTACACGTGG	368
HAT1	HAT1_10	TCAGTTCTCAGTCCAACAGGAGG	346
HCFC1	HCFC1_1	AGTTCCGGGAAAGGGTGCGGTGG	338
HCFC1	HCFC1_2	CATAGTTCCGGGAAAGGGTGCGG	335
HCFC1	HCFC1_3	GTCGCCCGCCAACTTGCCAGCGG	0
HCFC1	HCFC1_4	AAGCACCGCTGGCAAGTTGGCGG	345
HCFC1	HCFC1_5	GCAGCCCCGCTGGAAGCGAGTGG	236
HCFC1	HCFC1_6	GCCCCGCTGGAAGCGAGTGGTGG	256
HCFC1	HCFC1_7	CCCACCACTCGCTTCCAGCGGGG	379
HCFC1	HCFC1_8	AGCCCACCACTCGCTTCCAGCGG	375
HCFC1	HCFC1_9	CCTTGATGGCCACGGCGCGGTGG	470
HCFC1	HCFC1_10	GCTCCTTGATGGCCACGGCGCGG	262
HCFC2	HCFC2_1	CTCCCAGCCTCCTCAACTGGAGG	348
HCFC2	HCFC2_2	AAGAAACTCGCCTCCAGTTGAGG	232
HCFC2	HCFC2_3	GGCGAGTTTCTTCCTTCACGGGG	509
HCFC2	HCFC2_4	CCGGCACGGACACCGAGCGGTGG	284
HCFC2	HCFC2_5	GAGCTGATGATCATCTTTGGAGG	269
HCFC2	HCFC2_6	GCTGATGATCATCTTTGGAGGGG	377
HCFC2	HCFC2_7	CTGATGATCATCTTTGGAGGGGG	224
HCFC2	HCFC2_8	CATCTTTGGAGGGGGAAATGAGG	413
HCFC2	HCFC2_9	AGGGGGAAATGAGGGCATCGCGG	321
HCFC2	HCFC2_10	GTCTACAACACGGGTAGGCGCGG	0
HDAC1	HDAC1_1	GACGGTGAGCACCGTCCTCGCGG	150
HDAC1	HDAC1_2	GGTGAGCACCGTCCTCGCGGCGG	463
HDAC1	HDAC1_3	TGAGTCATGCGGATTCGGTGAGG	317
HDAC1	HDAC1_4	TGGCTTTGTGAGGGCGCTAGAGG	427
HDAC1	HDAC1_5	CTTTCAAGTCAACGTTGGTGAGG	420
HDAC1	HDAC1_6	TGATACCTAGGATCAGAAGGGGG	224
HDAC1	HDAC1_7	GTGATACCTAGGATCAGAAGGGG	20
HDAC1	HDAC1_8	CTGATCCTAGGTATCACCAGAGG	280
HDAC1	HDAC1_9	TATTCACCATGGTGACGGCGTGG	235
HDAC1	HDAC1_10	CCATGGTGACGGCGTGGAAGAGG	253
HDAC10	HDAC10_1	GTGACCACGGCGCAGCCATGGGG	1
HDAC10	HDAC10_2	CGGTCCCCATGGCTGCGCCGTGG	365
HDAC10	HDAC10_3	GACCGCGCTTGTGTACCATGAGG	650
HDAC10	HDAC10_4	GTCCTCATGGTACACAAGCGCGG	4
HDAC10	HDAC10_5	CTCGTCCCAGAGCAGCCGGGTGG	346
HDAC10	HDAC10_6	GCTGCTCTGGGACGAGTAAGTGG	387
HDAC10	HDAC10_7	GAGTAAGTGGGACCTGGCCGAGG	245
HDAC10	HDAC10_8	CGATCTCGCACTCGGGGCTGGGG	527
HDAC10	HDAC10_9	GACGCTCGATCTCGCACTCGGGG	507
HDAC10	HDAC10_10	CCGCAGGCGATCCAGGGCTGCGG	163
HDAC11	HDAC11_1	ATGAAGGTGATGTTGTAGCGCGG	295
HDAC11	HDAC11_2	CCCTTTGATGCCGGAAAATGGGG	303
HDAC11	HDAC11_3	TCTGTCTGACAGCATGCTGGTGG	390
HDAC11	HDAC11_4	ACAGCATGCTGGTGGAGGCGCGG	109
HDAC11	HDAC11_5	CATGCTGGTGGAGGCGCGGGAGG	292
HDAC11	HDAC11_6	CACCAGCAGGTCCTCCTCCGAGG	322
HDAC11	HDAC11_7	CTCGGAGGAGGACCTGCTGGTGG	245
HDAC11	HDAC11_8	ACCTGCTGGTGGTGCACACGAGG	285
HDAC11	HDAC11_9	GGTACAGGATGTCGGGCCTGGGG	238
HDAC11	HDAC11_10	GTACAGGATGTCGGGCCTGGGGG	1
HDAC2	HDAC2_1	ATGGCGTACAGTCAAGGAGGCGG	309
HDAC2	HDAC2_2	GCTACTACTACGACGGTGAGCGG	281
HDAC2	HDAC2_3	TGGGTCATGCGGATTCTATGAGG	318
HDAC2	HDAC2_4	ACAGCAAGTTATGGGTCATGCGG	268
HDAC2	HDAC2_5	TCTTCGGCAGTGGCTTTATGGGG	405
HDAC2	HDAC2_6	TTTTGTCATTTCTTCGGCAGTGG	405
HDAC2	HDAC2_7	TTTTGTCAGCTCTCAACTGGCGG	316
HDAC2	HDAC2_8	ATGGCTGTTAATTGGGCTGGAGG	304
HDAC2	HDAC2_9	TTACCATTACTGATGCTTGGAGG	274
HDAC2	HDAC2_10	CAGTTCGAGCATCAGACAAGCGG	283
HDAC3	HDAC3_1	GGTCTTGGCCATGGTGCCGGCGG	418
HDAC3	HDAC3_2	CTATTTCTACGACCCCGACGTGG	168
HDAC3	HDAC3_3	AGTGGAAGTTGCCCACGTCGGGG	561
HDAC3	HDAC3_4	GGGCAACTTCCACTACGGTGAGG	442
HDAC3	HDAC3_5	TCCCTGTTTCCTCACCGTAGTGG	300
HDAC3	HDAC3_6	ATAGGGTGTCCAGCTCCTGGGGG	239
HDAC3	HDAC3_7	CATAGGGTGTCCAGCTCCTGGGG	309
HDAC3	HDAC3_8	TGGGTCAATGCCAGGCGATGGGG	439
HDAC3	HDAC3_9	GCGGCACATGTCATGTTGGGAGG	248
HDAC3	HDAC3_10	CATGTGCCGCTTCCACTCCGAGG	564
HDAC4	HDAC4_1	TTCTGGCCGAGACCAGCCAGTGG	293
HDAC4	HDAC4_2	TGCTGGGCATGTGGTTCACGCGG	375
HDAC4	HDAC4_3	ACTTACCCGTGCTGGGCATGTGG	476
HDAC4	HDAC4_4	CGCCGTGGCCACATCCACTGTGG	359
HDAC4	HDAC4_5	CACTTGCAGAGGCAGCGCCGTGG	370
HDAC4	HDAC4_6	CACGGCGCTGCCTCTGCAAGTGG	373
HDAC4	HDAC4_7	GCCGAGGGGGCCACTTGCAGAGG	330
HDAC4	HDAC4_8	GTCCATGGGCACTGCCGAGGGGG	5
HDAC4	HDAC4_9	GGTCCATGGGCACTGCCGAGGGG	305
HDAC4	HDAC4_10	CAGGTCCATGGGCACTGCCGAGG	261
HDAC5	HDAC5_1	CGAGTCGGGTAAGAGCTGGGAGG	250
HDAC5	HDAC5_2	CATCCTTGGAAATCCTGCCGCGG	287
HDAC5	HDAC5_3	ATGCTGTGCAGAGAAGTCCGCGG	254
HDAC5	HDAC5_4	GAGCCATGCCCAGTTCCATGGGG	351
HDAC5	HDAC5_5	GCCATGCCCAGTTCCATGGGGGG	339
HDAC5	HDAC5_6	CAGCCCTGTGGAGCTACGGGGGG	292
HDAC5	HDAC5_7	GGAGCTACGGGGGGCTCTGGTGG	286
HDAC5	HDAC5_8	GCTCTGTGGACCCCACACTGCGG	351
HDAC5	HDAC5_9	GTTGCTGCTCCCGCAGTGTGGGG	1
HDAC5	HDAC5_10	CAGTTGCTGCTCCCGCAGTGTGG	405
HDAC6	HDAC6_1	GGTTGAGGTCATAGTTGAGGAGG	386
HDAC6	HDAC6_2	GCCGGTTGAGGTCATAGTTGAGG	581
HDAC6	HDAC6_3	GGTGGAATCCTGGCCGGTTGAGG	367
HDAC6	HDAC6_4	ACTTCTTCGCTGCCTGGTTGTGG	643
HDAC6	HDAC6_5	AGTCCTGAGGGGGCGACTGGGGG	445
HDAC6	HDAC6_6	GAGTCCTGAGGGGGCGACTGGGG	377
HDAC6	HDAC6_7	AGTGACACTGGAGTCCTGAGGGG	220
HDAC6	HDAC6_8	GAAGTGACACTGGAGTCCTGAGG	256
HDAC6	HDAC6_9	ACTCCAGTGTCACTTCGGTGAGG	432
HDAC6	HDAC6_10	GCTAGATTGGGGATAGAGCGGGG	421
HDAC7	HDAC7_1	GGCTGTGCATCCAGGGGCCGGGG	297
HDAC7	HDAC7_2	CGCCGGGGCTGTGCATCCAGGGG	451
HDAC7	HDAC7_3	CCCAGTACTCACCAGCGCCGGGG	352
HDAC7	HDAC7_4	CGGCGCTGGTGAGTACTGGGCGG	296
HDAC7	HDAC7_5	CGCCAGTGGGGCTGCAGTAGTGG	313
HDAC7	HDAC7_6	GACTCTTACCTGCGCCAGTGGGG	427
HDAC7	HDAC7_7	TTGACTCTTACCTGCGCCAGTGG	469
HDAC7	HDAC7_8	AGCCGCAGCCCATGGACCTGCGG	315
HDAC7	HDAC7_9	ACCCGCAGGTCCATGGGCTGCGG	271
HDAC7	HDAC7_10	GCAGCCCATGGACCTGCGGGTGG	306
HDAC8	HDAC8_1	CGGTTTTAAGCGGAAGATGGAGG	262
HDAC8	HDAC8_2	GGAGGAGCCGGAGGAACCGGCGG	241
HDAC8	HDAC8_3	CGACTTCCCTTACCCGTTTGGGG	281
HDAC8	HDAC8_4	ATGCACTGCATAAGCAGATGAGG	296
HDAC8	HDAC8_5	GCGGAAGATGGAGGAGCCGGAGG	145
HDAC8	HDAC8_6	GAACGGTTTTAAGCGGAAGATGG	188
HDAC8	HDAC8_7	TAAGCGGAAGATGGAGGAGCCGG	367
HDAC8	HDAC8_8	CCACTGTCCGCCGGTTCCTCCGG	316
HDAC8	HDAC8_9	CGGAGGAACCGGCGGACAGTGGG	415
HDAC8	HDAC8_10	AGCGACTGCCCACTGTCCGCCGG	255
HDAC9	HDAC9_1	CCTCAGGATGATGATGCCCGTGG	284
HDAC9	HDAC9_2	CAGGATGATGATGCCCGTGGTGG	344
HDAC9	HDAC9_3	CCTCTCAGAGGCAAAGATAGAGG	162
HDAC9	HDAC9_4	ATAGAGGACGAGAAAGTAAGAGG	436
HDAC9	HDAC9_5	TGTACCAGAGCTTGGGATGGCGG	373
HDAC9	HDAC9_6	TTTGATCCAATGATGTGTGGTGG	333
HDAC9	HDAC9_7	AGCTTTGATCCAATGATGTGTGG	317
HDAC9	HDAC9_8	CAAAGCTCTCCACCCCTTAGTGG	230
HDAC9	HDAC9_9	GGAGATGTTCCACTAAGGGGTGG	215
HDAC9	HDAC9_10	GATGGAGATGTTCCACTAAGGGG	273
HDGFL1	HDGFL1_1	GGCCGACATAGCTGGTTCTGCGG	319
HDGFL1	HDGFL1_2	GGCATGCCCATGTACAAGAGCGG	262
HDGFL1	HDGFL1_3	CATGCCCATGTACAAGAGCGGGG	322
HDGFL1	HDGFL1_4	GCTATGCCCACTGGCCGGCGAGG	273
HDGFL1	HDGFL1_5	GCTCTATCCTCGCCGGCCAGTGG	327
HDGFL1	HDGFL1_6	CGAAGAAAAACACCTGGTAGCGG	270
HDGFL1	HDGFL1_7	GACTCAGGAAGGCCGTCTCGTGG	296
HDGFL1	HDGFL1_8	GGCAAGCCCAACAAGAGGCGCGG	216
HDGFL1	HDGFL1_9	CAAGAGGCGCGGCTTCAGCGCGG	328
HDGFL1	HDGFL1_10	AGAGGCGCGGCTTCAGCGCGGGG	351
HELLS	HELLS_1	ACGACTACTTCTCGTTTAGGAGG	545
HELLS	HELLS_2	AAACATGTTTGGATCCAGTGAGG	237
HELLS	HELLS_3	TTGGATCCAGTGAGGTATAGTGG	329
HELLS	HELLS_4	CAGTCAAATACAGCCAGAGGTGG	397
HELLS	HELLS_5	TCTTCATCGATCTTAAGGAGGGG	291
HELLS	HELLS_6	CAGCTTCAACACGGATCCAGAGG	207
HELLS	HELLS_7	TTAGTGAGTACACGAGCTGGTGG	322
HELLS	HELLS_8	GGGCCTGAAGATCCGACTGGGGG	360
HELLS	HELLS_9	TGGGCCTGAAGATCCGACTGGGG	443
HELLS	HELLS_10	ATCTCCTGCTTCTTTGAAAGTGG	263
HINFP	HINFP_1	GGCCTTCACCCTAGAGGAAGAGG	291
HINFP	HINFP_2	CGGCATGGCCTTCACCCTAGAGG	399
HINFP	HINFP_3	CGGGGAACTTTCCCAGGAGGCGG	297
HINFP	HINFP_4	TTTCGGGGAACTTTCCCAGGAGG	268
HINFP	HINFP_5	TTCCCCGAAAGGAGAATCTGTGG	201
HINFP	HINFP_6	AGCCACAGATTCTCCTTTCGGGG	377
HINFP	HINFP_7	TGTCCTGCTCTCTTACCAAGTGG	330
HINFP	HINFP_8	AGGAAGAATTCTCCTGCTTGTGG	250
HINFP	HINFP_9	TCCTGCTTGTGGCAGGAATGTGG	136
HINFP	HINFP_10	AGCAGTGGAAGTAGACATGGCGG	529
HLTF	HLTF_1	ATCCAGGACATGGCGCTGAGTGG	321
HLTF	HLTF_2	TGGATGTTCAAGAGGTGAAGGGG	428
HLTF	HLTF_3	GGATGTTCAAGAGGTGAAGGGGG	492
HLTF	HLTF_4	TGTTCAAGAGGTGAAGGGGGCGG	228
HLTF	HLTF_5	TCAAGAGGTGAAGGGGGCGGAGG	488
HLTF	HLTF_6	AAAGTTGGATATGAGAGGCGTGG	247
HLTF	HLTF_7	CTAGTTAGAAAGTCATCTGGAGG	219
HLTF	HLTF_8	TGGAAGTTTGAGAGGTCATGTGG	453
HLTF	HLTF_9	TTCAATTTGGAAAGTGGTTGGGG	174
HLTF	HLTF_10	TGTTTTTGATGTGGAAGCAGTGG	416
HMG20B	HMG20B_1	GGATCAGTGCACTCACGCGGCGG	527
HMG20B	HMG20B_2	AGGGGATCAGTGCACTCACGCGG	447
HMG20B	HMG20B_3	GCCTGGAGCCAAGGATACCGCGG	0
HMG20B	HMG20B_4	AAGGCTCCGGGCCAGCATGGGGG	350
HMG20B	HMG20B_5	GTGACTGTCAAGCAAGAGCGCGG	3
HMG20B	HMG20B_6	TGTCAAGCAAGAGCGCGGCGAGG	240
HMG20B	HMG20B_7	GTCCACGCGCGGGCGAGAAGGGG	11
HMG20B	HMG20B_8	GACCCCTTCTCGCCCGCGCGTGG	685
HMG20B	HMG20B_9	CGAGAAGGGGTCCCACGAGGAGG	328
HMG20B	HMG20B_10	GGACTCTCACCTCCTCCTCGTGG	393
HSPBAP1	HSPBAP1_1	CTGCCATGGCTACCGCAAGGCGG	323
HSPBAP1	HSPBAP1_2	AGCCATGGCAGCAGGCTCCGAGG	215
HSPBAP1	HSPBAP1_3	GACCACTCCTGTGATCGTTGCGG	323
HSPBAP1	HSPBAP1_4	AGCCGCAACGATCACAGGAGTGG	293
HSPBAP1	HSPBAP1_5	TCCTGTGATCGTTGCGGCTGGGG	575
HSPBAP1	HSPBAP1_6	AGCAGATACGATTCAGAATGGGG	336
HSPBAP1	HSPBAP1_7	ATGGACAGGAAAGTACATTGTGG	223
HSPBAP1	HSPBAP1_8	AGTCCAGATGACAGGGTGTGTGG	230
HSPBAP1	HSPBAP1_9	CTTTGAGCTTTCCGGAACTGAGG	287
HSPBAP1	HSPBAP1_10	TCTTTGTTCCCAGACACTGGTGG	387
ING1	ING1_1	CAGACGGGGCGCAGAAGCGGCGG	261
ING1	ING1_2	CGTCGCCCAGCTCCTGGCTGCGG	380
ING1	ING1_3	CCAGATCGTGAGCCAGATGGTGG	395
ING1	ING1_4	GGAGAACCGCACGCGGCAGGTGG	357
ING1	ING1_5	GCGCCTCGAACAGCTCCACGTGG	287
ING1	ING1_6	GGCGACACAGCGGGCAACAGCGG	353
ING1	ING1_7	CAACAGCGGCAAGGCTGGCGCGG	257
ING1	ING1_8	CGCGGACAGGCCCAAAGGCGAGG	260
ING1	ING1_9	CCAACAGCAAGCGCTCACGGCGG	258
ING1	ING1_10	AGGCGCCGTCGTCGTGGTCGTGG	505
ING2	ING2_1	CGCTGCCCCACGACATGCAGAGG	568
ING2	ING2_2	ACGTTCCTCTGCATGTCGTGGGG	456
ING2	ING2_3	AAATATCAAGGTAGGAGCCGCGG	271
ING2	ING2_4	ATATCAAGGTAGGAGCCGCGGGG	355
ING2	ING2_5	TACACAAATGCTCGAATTGGTGG	267
ING2	ING2_6	CAAGAAGACCCCGCAGGCAGCGG	355
ING2	ING2_7	TCACTGGTCCGCTGCCTGCGGGG	423
ING2	ING2_8	TTTCACTGGTCCGCTGCCTGCGG	360
ING2	ING2_9	ATGCAACCAAGTGTCTTATGGGG	249
ING2	ING2_10	CACTTACCTATAAACCAAAGGGG	150
ING3	ING3_1	CATCGCGGCCCTTAGAGCTGAGG	283
ING3	ING3_2	GTCTTCTAGGTACAACATCGCGG	0
ING3	ING3_3	CTATCTGGAAAGTGAGTGCGCGG	229
ING3	ING3_4	AAGTGAGTGCGCGGCGCTGGCGG	423
ING3	ING3_5	AGCAGCTTCCTATGGATCTGCGG	288
ING3	ING3_6	TCTCGCGCATTTCCGTGAAGCGG	327
ING3	ING3_7	ATCGCGGCCCTTAGAGCTGAGGG	294
ING3	ING3_8	GTTGTACCTAGAAGACTATCTGG	1
ING3	ING3_9	CACTTTCCAGATAGTCTTCTAGG	251
ING3	ING3_10	GGAAAGTGAGTGCGCGGCGCTGG	639
ING4	ING4_1	CAGGTCTACAACAGAGACAGAGG	228
ING4	ING4_2	GGCACTACTCATATACTCAGTGG	489
ING4	ING4_3	TGCCCGCAGCCTGAGCTCCGAGG	393
ING4	ING4_4	TTTCCTCGGAGCTCAGGCTGCGG	396
ING4	ING4_5	AATGTGTTTGTCCACCTGGGTGG	208
ING4	ING4_6	AGGTGGACAAACACATTCGGCGG	384
ING4	ING4_7	CACAGACCTGGCCCGTTTTGAGG	357
ING4	ING4_8	AGTCCGGCCTTCTAGGGAAGAGG	411
ING4	ING4_9	ACTCAATGGAACACTGGAAGAGG	296
ING4	ING4_10	TCTTCCAGTGTTCCATTGAGTGG	273
ING5	ING5_1	GCGGTCGCCATCTTCGTCCGCGG	367
ING5	ING5_2	ATAGTGCTCCAAGTACATGGCGG	411
ING5	ING5_3	ACCTTCCCTGCGAACTTCAGAGG	562
ING5	ING5_4	TGATGCGAGAGCTGGACCAGAGG	526
ING5	ING5_5	CTGGACCAGAGGACGGAAGGTGG	328
ING5	ING5_6	CTTATCTGATGGAGAAATGGGGG	177
ING5	ING5_7	TGGAGACAGCGTCTTCACCGTGG	2
ING5	ING5_8	GCTGTCTCCAGACCAGCGCGTGG	326
ING5	ING5_9	TGCAGACCTACGAGATGGTGAGG	409
ING5	ING5_10	GACCTACGAGATGGTGAGGGCGG	333
INO80	INO80_1	TTGGGTGCCAGGGATGATGGAGG	516
INO80	INO80_2	TCTCCAAGTACTGAAGATAGAGG	175
INO80	INO80_3	TCTATCTTCAGTACTTGGAGAGG	243
INO80	INO80_4	GCAGAAAATGGTCCAACCGGAGG	200
INO80	INO80_5	TCCATTATTGCCCCAGTCTGGGG	389
INO80	INO80_6	ATTAAGGGATCCCCAGACTGGGG	214
INO80	INO80_7	TCACCAAGCAATGAATTTGGAGG	365
INO80	INO80_8	GTTCTACAGTCAGGTCAGTGTGG	2
INO80	INO80_9	CTCATAGAAAGGGTCATATGTGG	226
INO80	INO80_10	GCGACGAGGGGATTCTTCAGAGG	302
INO80B	INO80B_1	ATGAGGTCCTGCGAGGAAAGGGG	444
INO80B	INO80B_2	CTTACTCATGAGGTCCTGCGAGG	279
INO80B	INO80B_3	ACCTCATGAGTAAGCTGTGGCGG	349
INO80B	INO80B_4	GCCGCCACAGCTTACTCATGAGG	378
INO80B	INO80B_5	ATGAGTAAGCTGTGGCGGCGTGG	267
INO80B	INO80B_6	GCGGCGTGGGAGCACCTCTGGGG	433
INO80B	INO80B_7	GAGCACCTCTGGGGCTATGGAGG	345
INO80B	INO80B_8	AGGGGCCTCCATAGCCCCAGAGG	171
INO80B	INO80B_9	TTCGCGCTTACCCGGCTCAGGGG	365
INO80B	INO80B_10	CTTGGCAGGGGACGGCTGCGTGG	373
INO80C	INO80C_1	GAAGACTCGGAGTGCGATGGCGG	381
INO80C	INO80C_2	GGCGGCGCAAATTCCAATTGTGG	361
INO80C	INO80C_3	TATTCCGGGAGTGGAAGTGGTGG	292
INO80C	INO80C_4	GACTATTCCGGGAGTGGAAGTGG	268
INO80C	INO80C_5	GTTCCGGACTATTCCGGGAGTGG	1
INO80C	INO80C_6	TAGTCCGGAACAGCAAGAAGAGG	354
INO80C	INO80C_7	TCCCACAATGGCAGCAGCGGCGG	381
INO80C	INO80C_8	CCCCGCCGCTGCTGCCATTGTGG	569
INO80C	INO80C_9	CACAATGGCAGCAGCGGCGGGGG	449
INO80C	INO80C_10	TACCTGCGCAAAGCTGGAAGCGG	287
INO80D	INO80D_1	GCCCCAAACTGTGCAAGCAGAGG	369
INO80D	INO80D_2	CTGTATCAGACACGTTCTGGAGG	607
INO80D	INO80D_3	ATATTCACATTGCTTGAAGGGGG	390
INO80D	INO80D_4	ACCTACGATCCTCTGATTTGGGG	545
INO80D	INO80D_5	TAAAGCCAAGTACCTGCAAGTGG	466
INO80D	INO80D_6	GGGCATCTTCAAGGCCAACGTGG	231
INO80D	INO80D_7	CCCTTGCCCCAGGTGGAGAGAGG	322
INO80D	INO80D_8	AGAGGGACCCTTGCCCCAGGTGG	441
INO80D	INO80D_9	AGATGATGACCTAAAGAAAGGGG	254
INO80D	INO80D_10	AGGTGGGAGTGCTGCTGCGGAGG	580
INO80E	INO80E_1	GTTCATGACCGGCCCGGGAGTGG	5
INO80E	INO80E_2	GCCGGTCATGAACGGGCCGGCGG	294
INO80E	INO80E_3	AAAAATACCGGAATCTGAAGCGG	228
INO80E	INO80E_4	CATCTACGTGAGTGCTGCCGCGG	353
INO80E	INO80E_5	GCTCCTGTATCACGGGCAAGGGG	255
INO80E	INO80E_6	GGAGCACGAGTGCTTCCAGGAGG	235
INO80E	INO80E_7	GTGTCCCGGGACAAGAGGTGAGG	3
INO80E	INO80E_8	AGAGGTGAGGCACGTTGCAGGGG	492
INO80E	INO80E_9	GGTGAGGCACGTTGCAGGGGCGG	389
INO80E	INO80E_10	TCTAGGAGGAAACTGAGGGGAGG	239
JADE1	JADE1_1	CCCGGGGAGATCATGAAACGAGG	305
JADE1	JADE1_2	TCGCCTTCCCAGCAGCAGTGAGG	385
JADE1	JADE1_3	TGAAGATCGAAAGCCTTCAGAGG	233
JADE1	JADE1_4	TCCAGGTGCCTGTGAGCCCGGGG	274
JADE1	JADE1_5	GGGGACCATCCCTCAGCCTGTGG	353
JADE1	JADE1_6	ATGCAGCATCCATGTCATTGAGG	271
JADE1	JADE1_7	TAGATGAATACACCATGGAGAGG	106
JADE1	JADE1_8	CACCATGGAGAGGGTCCTAGAGG	352
JADE1	JADE1_9	GAATCATGCCATAGAGACTGAGG	275
JADE1	JADE1_10	CTGCCAGTCTCCTGATGGTGAGG	239
JADE2	JADE2_1	CTGGAAGGCCTTACTGTCAGTGG	417
JADE2	JADE2_2	CAGTTTGGAGCATCTTGATGCGG	431
JADE2	JADE2_3	GGCTTCTTTTCGTTCTGTCGGGG	208
JADE2	JADE2_4	GAACGAAAAGAAGCCCTCCGAGG	210
JADE2	JADE2_5	CGAAAAGAAGCCCTCCGAGGTGG	275
JADE2	JADE2_6	CTCATCACTACCCACCTCGGAGG	358
JADE2	JADE2_7	CTGTCCGGAAAACCTGTGAGGGG	253
JADE2	JADE2_8	GTCTGTCCGGAAAACCTGTGAGG	1
JADE2	JADE2_9	AGGTGTGCAGGTGCCTGCCGGGG	381
JADE2	JADE2_10	GCAGGTGCCTGCCGGGGCAGAGG	209
JADE3	JADE3_1	TGAGCCAGAAGTAAAGGAAGTGG	330
JADE3	JADE3_2	TGAACACAAGAAACCTGCTGAGG	265
JADE3	JADE3_3	GAAGTTTCATGGCACTGATGAGG	302
JADE3	JADE3_4	AAATACCTGAGAGAAGGCTGTGG	338
JADE3	JADE3_5	GAGCAGTGAATATACTTCCGGGG	243
JADE3	JADE3_6	GTTGATGTAGCCAGGCTCTGTGG	1
JADE3	JADE3_7	GAACCATGCTATTGAGACAGAGG	264
JADE3	JADE3_8	GTGCATCAGGTTAGTGAGAGTGG	0
JADE3	JADE3_9	GGATGCCATAGCAGGCCTGGAGG	329
JADE3	JADE3_10	TTTGGACATAACACACATTGCGG	355
JARID2	JARID2_1	ATGACAGTGATGGGATTCCGTGG	325
JARID2	JARID2_2	TCCGTGGTCAGAAGAACGGGTGG	256
JARID2	JARID2_3	TTCCCAGAAGAGGCAGCATGCGG	295
JARID2	JARID2_4	AGCCCTACAGGTGAGAAAAGGGG	267
JARID2	JARID2_5	ACTAACATCGTTGCTAGTGGAGG	221
JARID2	JARID2_6	AGAACTAACATCGTTGCTAGTGG	221
JARID2	JARID2_7	ATTTTGAAGAAGGGCCGTCGAGG	271
JARID2	JARID2_8	GATATCTGAGTAGCTGGAGGGGG	249
JARID2	JARID2_9	TGATATCTGAGTAGCTGGAGGGG	365
JARID2	JARID2_10	TCTGATATCTGAGTAGCTGGAGG	332
JMJD1C	JMJD1C_1	CATAGCTGTCGCTGCCGAAGCGG	298
JMJD1C	JMJD1C_2	TTCGGCAGCGACAGCTATGGCGG	429
JMJD1C	JMJD1C_3	CAGCTATGGCGGTAGAGACGCGG	245
JMJD1C	JMJD1C_4	AGAGACGCGGGCAGAGCTGGTGG	325
JMJD1C	JMJD1C_5	GGGTAAGCGGTTCCTGTGTGTGG	365
JMJD1C	JMJD1C_6	TAAGCGGTTCCTGTGTGTGGCGG	381
JMJD1C	JMJD1C_7	GTGTGTGGCGGTCGGCGACGAGG	13
JMJD1C	JMJD1C_8	CGTTCGGAGCGCTGGGAGAGCGG	320
JMJD1C	JMJD1C_9	GAGCGCTGGGAGAGCGGACGCGG	236
JMJD1C	JMJD1C_10	CGGCTGGCGAAGCTGGCGAGCGG	109
JMJD4	JMJD4_1	TTCTGCCCCGCCAGCGCCTGGGG	442
JMJD4	JMJD4_2	GCGCTGGCGGGGCAGAAACGCGG	249
JMJD4	JMJD4_3	CCGCCGGAGCGGAAACGGTGAGG	294
JMJD4	JMJD4_4	TTTCCGCTCCGGCGGAAGTGAGG	254
JMJD4	JMJD4_5	CCTCCTCACTTCCGCCGGAGCGG	458
JMJD4	JMJD4_6	CTCGGAAGTGGCTGTCGGCGAGG	253
JMJD4	JMJD4_7	CTCGCCGACAGCCACTTCCGAGG	515
JMJD4	JMJD4_8	CGACCCCCAGGCCTCGGAAGTGG	604
JMJD4	JMJD4_9	TCTCCTACGCCGACTTTGTGCGG	427
JMJD4	JMJD4_10	TCCTACGCCGACTTTGTGCGGGG	396
JMJD6	JMJD6_1	CTCTTGTGGTTCATTCTGCGGGG	333
JMJD6	JMJD6_2	TGCTCTTGTGGTTCATTCTGCGG	265
JMJD6	JMJD6_3	GGATGCGCTTCTTGCTCTTGTGG	294
JMJD6	JMJD6_4	GAGCAAGAAGCGCATCCGCGAGG	371
JMJD6	JMJD6_5	AGCGCATCCGCGAGGCCAAGCGG	400
JMJD6	JMJD6_6	GCGCACTCCGCTTGGCCTCGCGG	456
JMJD6	JMJD6_7	GCGAGGCCAAGCGGAGTGCGCGG	341
JMJD6	JMJD6_8	GAGCTTCTCGCTGAGCCCGGCGG	271
JMJD6	JMJD6_9	TTAATTCCCTCAGGATAACGTGG	102
JMJD6	JMJD6_10	GCCCTTTCCACGTTATCCTGAGG	303
JMJD7	JMJD7_1	CGGCGCTGACGCAGCCATGGCGG	347
JMJD7	JMJD7_2	CGCTGACGCAGCCATGGCGGAGG	414
JMJD7	JMJD7_3	AGGCGGCTTTGGAAGCCGTGCGG	235
JMJD7	JMJD7_4	GAATTCCCGGCCGCTGCAAGGGG	402
JMJD7	JMJD7_5	CGGCCGCTGCAAGGGGTGAGTGG	415
JMJD7	JMJD7_6	GAGCCACTCACCCCTTGCAGCGG	360
JMJD7	JMJD7_7	TAGAAGTGGAGCGGAGTTGGGGG	394
JMJD7	JMJD7_8	GTAGAAGTGGAGCGGAGTTGGGG	18
JMJD7	JMJD7_9	CAGTCCCGGTAGAAGTGGAGCGG	259
JMJD7	JMJD7_10	AGACCCAGTCCCGGTAGAAGTGG	229
JMJD8	JMJD8_1	AGCTGCCGGCCAATGGCTGGCGG	326
JMJD8	JMJD8_2	AAGGTTCCCGGCGTGCAGCGCGG	540
JMJD8	JMJD8_3	TGTGGCTCTACCCGGCTCCGGGG	375
JMJD8	JMJD8_4	TCTACCCGGCTCCGGGGCGGAGG	307
JMJD8	JMJD8_5	GGAGGAGGAGCGCTGCACGGTGG	409
JMJD8	JMJD8_6	TCGGGCCGACCTCACCTACGCGG	481
JMJD8	JMJD8_7	GCACGAACTCCGCGTAGGTGAGG	454
JMJD8	JMJD8_8	AGTACGTGCGCCCCTGATCGCGG	322
JMJD8	JMJD8_9	AGGGCCCGGAACCTCTGCGGGGG	235
JMJD8	JMJD8_10	CAGGGCCCGGAACCTCTGCGGGG	253
KANSL1	KANSL1_1	CGGCAAAGGCTGCATCGGATAGG	305
KANSL1	KANSL1_2	CGGCGAAGGCTGCGTCGGATAGG	473
KANSL1	KANSL1_3	CAGGGCGGCAAAGGCTGCATCGG	377
KANSL1	KANSL1_4	CAGGGCGGCGAAGGCTGCGTCGG	469
KANSL1	KANSL1_5	ATTTCTTCCGCTTAGTTCTGAGG	359
KANSL1	KANSL1_6	GTCTTCACCTCAGAACTAAGTGG	10
KANSL1	KANSL1_7	GGGGACAATGGGAGGCGAGGTGG	480
KANSL1	KANSL1_8	GTCTTCACCTCAGAACTAAGCGG	7
KANSL1	KANSL1_9	GAGGGGGACAATGGGAGGCGAGG	278
KANSL1	KANSL1_10	GAGGGGGACAGTGGGAGGCGAGG	384
KANSL2	KANSL2_1	GTTCATAACCAAAACCTGCGGGG	1
KANSL2	KANSL2_2	CTGTTCATAACCAAAACCTGCGG	240
KANSL2	KANSL2_3	CACGTCTTGCCAACCAATCGGGG	289
KANSL2	KANSL2_4	ACGTCTTGCCAACCAATCGGGGG	351
KANSL2	KANSL2_5	TCTTGCCAACCAATCGGGGGAGG	498
KANSL2	KANSL2_6	ATGCTCTCACCCTCGTCTGGAGG	416
KANSL2	KANSL2_7	AACTCCTGCCCCTCCAGACGAGG	337
KANSL2	KANSL2_8	GAAGACCAACCCAGGGCCTGTGG	259
KANSL2	KANSL2_9	CATATGCTAAGACAGAGCTGGGG	429
KANSL2	KANSL2_10	ACTCCAGCTGTCTTCATCTGAGG	409
KANSL3	KANSL3_1	GGTGGGCCATGTCAGTGGAGGGG	364
KANSL3	KANSL3_2	CCGGTGGGCCATGTCAGTGGAGG	435
KANSL3	KANSL3_3	TCCACTGACATGGCCCACCGGGG	1
KANSL3	KANSL3_4	ACCCCGGTGGGCCATGTCAGTGG	517
KANSL3	KANSL3_5	ACTGACATGGCCCACCGGGGTGG	373
KANSL3	KANSL3_6	TGACATGGCCCACCGGGGTGGGG	472
KANSL3	KANSL3_7	TGAAAGCTGGAAGAGCAGCGAGG	207
KANSL3	KANSL3_8	CAAAGAGCATGCGGGTGGGGCGG	301
KANSL3	KANSL3_9	TGACAAAGAGCATGCGGGTGGGG	314
KANSL3	KANSL3_10	AGTGACAAAGAGCATGCGGGTGG	571
KAT2A	KAT2A_1	AGGAGTCGGAGTTGGGGCAGGGG	401
KAT2A	KAT2A_2	GGGTGCAGGAGTCGGAGTTGGGG	414
KAT2A	KAT2A_3	AGCCGGCAGCACAGGGACTGGGG	419
KAT2A	KAT2A_4	GCCGGCAGCACAGGGACTGGGGG	366
KAT2A	KAT2A_5	AGCAGCAGCGCGCCAGTCAGAGG	421
KAT2A	KAT2A_6	CAGAGGAAGGCGCAAGTCCGGGG	585
KAT2A	KAT2A_7	AGAGGAAGGCGCAAGTCCGGGGG	426
KAT2A	KAT2A_8	TTCTCAAGCTTCTTGGCGCGCGG	321
KAT2A	KAT2A_9	CAAGAAGCTTGAGAAGCTAGGGG	160
KAT2A	KAT2A_10	GGTCTTCTCGGCTTGCAAGGTGG	417
KAT2B	KAT2B_1	GCTCCGGGGCGGCATGTCCGAGG	298
KAT2B	KAT2B_2	GGCGGCATGTCCGAGGCTGGCGG	343
KAT2B	KAT2B_3	CTGCGGTCCGGCGACGGCAGTGG	372
KAT2B	KAT2B_4	GGCACGGCCGAAGGACCGGGAGG	185
KAT2B	KAT2B_5	ACGGCCGAAGGACCGGGAGGCGG	220
KAT2B	KAT2B_6	GCCGAAGGACCGGGAGGCGGTGG	239
KAT2B	KAT2B_7	CGCAACTACGCTCCGCTCCGCGG	184
KAT2B	KAT2B_8	CAGTTTCTTGGCCCGCGGAGCGG	275
KAT2B	KAT2B_9	TTCTCCAGTTTCTTGGCCCGCGG	282
KAT2B	KAT2B_10	GCGAGCGCGTACCTTGCAGGCGG	498
KAT5	KAT5_1	GCGTCGCGCTGTCTCCCCAGGGG	730
KAT5	KAT5_2	CGTCGCGCTGTCTCCCCAGGGGG	471
KAT5	KAT5_3	TCCCCAGGGGGAGATAATCGAGG	320
KAT5	KAT5_4	GCTGCCGCCTACCCGTGCTGCGG	315
KAT5	KAT5_5	TCCGCCGCAGCACGGGTAGGCGG	423
KAT5	KAT5_6	ACCAGGACAACGAAGATGAGTGG	389
KAT5	KAT5_7	GAGTGGCGTGAGTGACGTTGGGG	550
KAT5	KAT5_8	AGTGGCGTGAGTGACGTTGGGGG	544
KAT5	KAT5_9	GTGGCGTGAGTGACGTTGGGGGG	15
KAT5	KAT5_10	GCGTGAGTGACGTTGGGGGGCGG	400
KAT6A	KAT6A_1	TCCAATTTTCCATGGTTCCGAGG	307
KAT6A	KAT6A_2	GAGGGCTTGGCAGAGTCTGGTGG	358
KAT6A	KAT6A_3	GATGTGTCTGCATTATTCGGAGG	325
KAT6A	KAT6A_4	TAACTGCTGGTGAAAGCCAGAGG	331
KAT6A	KAT6A_5	CATCTTTAAGGAGTCTGCCGTGG	261
KAT6A	KAT6A_6	TTAGTGTTGAGCCGATAAAGAGG	221
KAT6A	KAT6A_7	CAACACTAAAGCAACCAACGTGG	183
KAT6A	KAT6A_8	CAAGACAGAAACTACAGATGGGG	275
KAT6A	KAT6A_9	AGGATGGATGGCCTAATACGAGG	379
KAT6A	KAT6A_10	CACTCGAACCGTTAGTTCAGGGG	504
KAT6B	KAT6B_1	TGAAGAGAGAATCTGCCATGCGG	306
KAT6B	KAT6B_2	GTTGTCTGGGTCCTTATAGGAGG	0
KAT6B	KAT6B_3	CTTTTCCTAAGTCAGCCAAGGGG	247
KAT6B	KAT6B_4	AAGTCAGCCAAGGGGTCTAGAGG	347
KAT6B	KAT6B_5	ATGTAATGATCTCCGCAATGTGG	382
KAT6B	KAT6B_6	GTTTATTCCAATCCACATTGCGG	0
KAT6B	KAT6B_7	GAGAGCAATTGAAGGACTTGAGG	289
KAT6B	KAT6B_8	CTGAAAGGCTGGGTTGTTGGTGG	381
KAT6B	KAT6B_9	ACAACCCAGCCTTTCAGCAGCGG	288
KAT6B	KAT6B_10	TTCAGCAGCGGCTGCGACTGGGG	344
KAT7	KAT7_1	TTCCTTCGCGGCATTGCCGGCGG	408
KAT7	KAT7_2	AAGGTGAGAAACGGGAGAGGAGG	344
KAT7	KAT7_3	GGCTTAGCCTGGCTGAGGAGCGG	408
KAT7	KAT7_4	ACTCTGGCTTAGCCTGGCTGAGG	297
KAT7	KAT7_5	GTAAGGTGTCCTGTTAAAGGAGG	1
KAT7	KAT7_6	GACAACTCACCATGTGCCGGCGG	255
KAT7	KAT7_7	CTTGAAAATTATGCAGGTAGCGG	238
KAT7	KAT7_8	ACAGGTAAGGTTCTCATCAGGGG	327
KAT7	KAT7_9	CTCAGGACCTGATTGATGAGTGG	363
KAT7	KAT7_10	AGGAAGGTGAGAAACGGGAGAGG	269
KAT8	KAT8_1	CACTTCCCTTCCCGCGATGGCGG	409
KAT8	KAT8_2	AGCTCCCTGTGCCGCCATCGCGG	383
KAT8	KAT8_3	GGCGGCACAGGGAGCTGCTGCGG	399
KAT8	KAT8_4	GGTTGCGGCGGGGACTTCAGGGG	10
KAT8	KAT8_5	GGGGACTTCAGGGGTCGCGGGGG	383
KAT8	KAT8_6	GACTTCAGGGGTCGCGGGGGAGG	560
KAT8	KAT8_7	CGGGGAGAATGCGGCCGCTGAGG	316
KAT8	KAT8_8	GGATGGGGCGGTCCCCTCAGCGG	422
KAT8	KAT8_9	AGAGACGCGGCCCGGGGATGGGG	483
KAT8	KAT8_10	CGGCGAGCCGGAAGTCACGGTGG	404
KDM1A	KDM1A_1	AGCGGCAGCAACCGGGACGGAGG	321
KDM1A	KDM1A_2	GCTGGCCCTGGGACAGCAGGCGG	130
KDM1A	KDM1A_3	CGGCTCCGAGAACGGGTCTGAGG	314
KDM1A	KDM1A_4	CTCCGAGAACGGGTCTGAGGTGG	437
KDM1A	KDM1A_5	CGCGGAGGCTCTTTCTTGCGGGG	297
KDM1A	KDM1A_6	CCCGCAAGAAAGAGCCTCCGCGG	267
KDM1A	KDM1A_7	ACGACAGTAGGGCCGGCCTGAGG	331
KDM1A	KDM1A_8	TGCTATTCCAGTTTCCATGGGGG	378
KDM1A	KDM1A_9	CTGCTATTCCAGTTTCCATGGGG	122
KDM1A	KDM1A_10	TGGAATAGCAGAGACTCCGGAGG	334
KDM1B	KDM1B_1	AATGTAATGGCAACTCCACGGGG	288
KDM1B	KDM1B_2	ATGTAATGGCAACTCCACGGGGG	310
KDM1B	KDM1B_3	TAATGGCAACTCCACGGGGGAGG	233
KDM1B	KDM1B_4	TTTTTCTTTGTCCTCCCCCGTGG	233
KDM1B	KDM1B_5	CTCCGGATAGCCTTCCTTTGAGG	298
KDM1B	KDM1B_6	AGCAACAGAGACAACAGATGAGG	361
KDM1B	KDM1B_7	GGAGAGATGATACCATCGGGAGG	123
KDM1B	KDM1B_8	CGATGGTATCATCTCTCCTGTGG	341
KDM1B	KDM1B_9	TCACTCTCCTTACCCAGTAGGGG	472
KDM1B	KDM1B_10	AACCTGAGTGTAGAAAATGGAGG	342
KDM2A	KDM2A_1	CAGCAAAATCTAAGGGTAGGAGG	271
KDM2A	KDM2A_2	CTACCCTTAGATTTTGCTGGAGG	237
KDM2A	KDM2A_3	GTACTATAGGAACTCCAGTGAGG	0
KDM2A	KDM2A_4	CTGGAGTTCCTATAGTACAGTGG	320
KDM2A	KDM2A_5	TCCCCACTCGGCCAAAGGTGCGG	480
KDM2A	KDM2A_6	AACCCGCACCTTTGGCCGAGTGG	329
KDM2A	KDM2A_7	TAGTGTGAGGCTTCGTAATGGGG	592
KDM2A	KDM2A_8	GGAGCTGGTTTCATAGTGTGAGG	292
KDM2A	KDM2A_9	CTCCACGGTTAACACCTGTGAGG	218
KDM2A	KDM2A_10	GGCTCCTGACACAATCGGGGAGG	246
KDM2B	KDM2B_1	GCGGTCAATCGGGCGCTGCGAGG	412
KDM2B	KDM2B_2	CGTTCTCGTCGTATCGCTGGCGG	359
KDM2B	KDM2B_3	GAACGAGGACTTGTCGGACGTGG	472
KDM2B	KDM2B_4	CGAGGACTTGTCGGACGTGGAGG	306
KDM2B	KDM2B_5	GAGGAGATCGTCAGCGTCCGCGG	282
KDM2B	KDM2B_6	TTCGCAGCCAGCTGTACCAGGGG	455
KDM2B	KDM2B_7	TCGCAGCCAGCTGTACCAGGGGG	285
KDM2B	KDM2B_8	GGACTTCGTGCACGCCATGGAGG	602
KDM2B	KDM2B_9	CGCCATGGAGGGCAAAGGTGAGG	173
KDM2B	KDM2B_10	TCCTTTTCTCGAAATATCAGGGG	211
KDM3A	KDM3A_1	AGAAAGTTGGCCGGTATTGGTGG	376
KDM3A	KDM3A_2	AAAGTTGGCCGGTATTGGTGGGG	352
KDM3A	KDM3A_3	GTTGGCCGGTATTGGTGGGGAGG	5
KDM3A	KDM3A_4	GGCCGGTATTGGTGGGGAGGAGG	377
KDM3A	KDM3A_5	GCCATCGCTGCCGTCGGCTGCGG	404
KDM3A	KDM3A_6	CAGCCACGACAGCTGGGACGTGG	335
KDM3A	KDM3A_7	GCTCCACGTCCCAGCTGTCGTGG	419
KDM3A	KDM3A_8	ACGTGGAGCGCGTCGCCGAGTGG	556
KDM3A	KDM3A_9	GAAGGATCTGAAGGTACAGGCGG	419
KDM3A	KDM3A_10	ACCTAGACAGACAAAATTGGGGG	243
KDM3B	KDM3B_1	CAGCAGCCGCTTGCCCACCGGGG	0
KDM3B	KDM3B_2	GCTGCTGTTCGCGGACACTGCGG	339
KDM3B	KDM3B_3	CGCTGCGCACTCGAGCCTGGCGG	374
KDM3B	KDM3B_4	GGCACGGTGCGGGCCATGAGCGG	384
KDM3B	KDM3B_5	CACGGTGCGGGCCATGAGCGGGG	444
KDM3B	KDM3B_6	GGCGGTGCCCCAGGACCTAGCGG	280
KDM3B	KDM3B_7	CCCCAGGACCTAGCGGTGAGTGG	264
KDM3B	KDM3B_8	CAGGACCTAGCGGTGAGTGGCGG	286
[truncated: 3,083 more rows]

## Sheet: Screen results_gene level
Supplemental Table 1: Analysis of CRISPR screen using single-guide (sg) RNAs targeting epigenetic modifiers.
gene	num	pos|rank	pos|goodsgrna	pos|lfc	merged p value	LFC	logP
FBXO11	10	1	9	2.9705	4.96e-06	-2.9705	5.30452
KMT2D	9	2	7	2.857	4.96e-06	-2.857	5.30452
PRMT5	10	3	6	0.67356	4.47e-05	-0.67356	4.34969
CXXC1	9	4	7	1.9432	7.44e-05	-1.9432	4.12843
NCOA6	10	5	9	2.9869	0.47165	-2.9869	4.12843
SUPT7L	10	468	2	-1.317	0.00015381	1.317	3.81302
ZNF217	10	6	8	2.284	0.00021334	-2.284	3.67093
KDM5C	8	494	0	-1.0143	0.00038204	1.0143	3.41789
MEN1	9	493	0	-1.2593	0.00048127	1.2593	3.31761
FBXO10	9	334	1	-1.2041	0.00053088	1.2041	3.275
SUPT4H1	9	483	2	-1.2098	0.00071942	1.2098	3.14302
SETD1B	10	7	8	2.6156	0.0027735	-2.6156	2.55697
CREBBP	10	8	8	1.7285	0.43101	-1.7285	2.51129
NAA20	10	9	5	1.0312	0.12597	-1.0312	2.35843
ATXN7L3	10	10	8	1.503	0.0044108	-1.503	2.35548
RUVBL2	10	11	8	2.6832	0.0050558	-2.6832	2.29621
ARID5A	9	474	2	-1.1417	0.0058099	1.1417	2.23583
YWHAG	10	12	9	1.2703	0.0064847	-1.2703	2.18811
SETDB2	9	14	5	0.2188	0.21585	-0.2188	2.18217
SET	10	13	6	1.2271	0.21507	-1.2271	2.15302
RCOR1	10	15	6	0.98235	0.0076556	-0.98235	2.11602
ATAD1	9	16	9	1.5893	0.0091341	-1.5893	2.03933
TRDMT1	10	491	1	-0.83097	0.010057	0.83097	1.99753
TAF10	9	411	4	-1.3602	0.01101	1.3602	1.95821
NAA15	10	17	7	1.5875	0.49112	-1.5875	1.91328
KDM8	9	18	4	0.19384	0.077077	-0.19384	1.90696
MBD3	10	19	9	1.7224	0.014076	-1.7224	1.85152
KMT2A	10	484	1	-1.5809	0.014076	1.5809	1.85152
KDM2A	10	479	2	-1.2137	0.014314	1.2137	1.84424
PHF19	20	448	7	-0.49275	0.016914	0.49275	1.77175
KDM5B	9	21	7	1.85	0.019533	-1.85	1.70923
TAF1	10	20	5	0.078428	0.020089	-0.078428	1.69704
MBD3L4	4	188	1	-1.4932	0.020833	1.4932	1.68125
CTBP2	9	22	8	1.4561	0.021111	-1.4561	1.67549
RSF1	9	492	0	-0.8838	0.022074	0.8838	1.65612
BRD2	9	268	3	-1.2845	0.022461	1.2845	1.64857
PRMT1	10	23	6	0.82079	0.13865	-0.82079	1.60429
UTY	9	25	8	0.90205	0.025805	-0.90205	1.5883
PHB2	10	24	7	2.1202	0.44985	-2.1202	1.57127
SMYD5	9	416	2	-0.82267	0.028276	0.82267	1.54858
MBD2	9	481	2	-1.4431	0.028831	1.4431	1.54014
TAF1A	10	26	5	0.86274	0.029764	-0.86274	1.52631
UHRF2	10	402	2	-0.8282	0.031213	0.8282	1.50566
PRMT7	7	27	3	0.12507	0.042366	-0.12507	1.46372
ARID3B	10	313	5	-0.21393	0.037335	0.21393	1.42788
HMG20B	8	30	7	1.5583	0.03933	-1.5583	1.40528
INO80	9	29	6	1.1795	0.039389	-1.1795	1.40463
JMJD4	10	28	5	0.65796	0.041295	-0.65796	1.3841
ARID2	9	31	5	0.54021	0.04312	-0.54021	1.36532
BAZ1A	9	445	2	-0.67723	0.043716	0.67723	1.35936
SRCAP	10	32	8	1.3359	0.04581	-1.3359	1.33904
INO80C	10	33	7	1.0126	0.046206	-1.0126	1.3353
JADE3	8	442	1	-1.1822	0.047467	1.1822	1.32361
RAD54B	20	467	5	-0.39074	0.050086	0.39074	1.30028
SMARCA5	10	382	3	-0.92965	0.051753	0.92965	1.28606
NAT8L	8	465	2	-0.89101	0.052259	0.89101	1.28184
NCOA4	8	34	6	1.3496	0.053946	-1.3496	1.26804
KDM3B	9	331	3	-1.0245	0.056437	1.0245	1.24844
TDRD5	10	383	5	-0.2037	0.058154	0.2037	1.23542
SUPT20H	10	333	3	-0.69619	0.059106	0.69619	1.22837
CBX7	10	35	6	0.56253	0.30757	-0.56253	1.22618
CSRP2BP	10	217	3	-0.6515	0.063601	0.6515	1.19654
ING1	10	36	8	1.3691	0.064405	-1.3691	1.19108
YAF2	9	37	8	1.055	0.064911	-1.055	1.18768
NAT9	10	385	4	-0.25862	0.065477	0.25862	1.18391
CHD3	10	38	6	1.3276	0.069496	-1.3276	1.15804
TADA2A	10	473	3	-0.81996	0.070557	0.81996	1.15146
PAF1	9	39	6	2.5222	0.070796	-2.5222	1.14999
KAT6B	8	347	2	-0.51122	0.073991	0.51122	1.13082
BRD9	10	290	3	-0.47968	0.07416	0.47968	1.12983
PHF6	9	42	8	0.3337	0.076253	-0.3337	1.11774
PWWP2B	10	41	8	1.458	0.077384	-1.458	1.11135
ARID4B	8	335	2	-0.51844	0.081334	0.51844	1.08973
KDM4D	10	423	4	-0.62589	0.081512	0.62589	1.08878
CDK9	9	393	3	-0.9742	0.083338	0.9742	1.07916
PHF21A	9	44	5	0.79052	0.3668	-0.79052	1.07571
EHMT1	9	45	5	1.4583	0.084479	-1.4583	1.07325
ATAD3A	10	43	7	0.53015	0.084589	-0.53015	1.07269
JMJD7	9	318	4	-0.064512	0.084589	0.064512	1.07269
SETD1A	8	51	5	1.9237	0.33706	-1.9237	1.06853
CRB3	10	404	3	-0.60576	0.085839	0.60576	1.06632
KDM6A	10	46	4	0.16751	0.087863	-0.16751	1.05619
SIRT4	9	50	5	1.1941	0.088637	-1.1941	1.05238
PRMT2	10	475	3	-0.46534	0.088965	0.46534	1.05078
UBE3A	10	47	8	1.209	0.089371	-1.209	1.0488
RCOR2	10	48	7	0.38708	0.089778	-0.38708	1.04683
EP300	9	490	1	-2.139	0.089838	2.139	1.04654
TP53BP1	10	49	8	1.1874	0.090671	-1.1874	1.04253
YWHAE	8	56	6	0.84627	0.090711	-0.84627	1.04234
TBL1X	10	52	8	0.73091	0.094651	-0.73091	1.02387
ING3	8	444	3	-0.80833	0.095296	0.80833	1.02093
CLOCK	10	53	6	0.77019	0.08961	-0.77019	1.02084
DMAP1	10	54	5	0.31574	0.50717	-0.31574	1.01719
C14orf169	10	55	6	1.387	0.11639	-1.387	1.01317
NAA60	10	340	5	-0.06814	0.097866	0.06814	1.00937
MBD5	8	60	5	0.95938	0.098243	-0.95938	1.0077
SIN3B	9	58	6	0.65842	0.098977	-0.65842	1.00447
RBBP5	9	59	6	1.4619	0.29812	-1.4619	1.0032
SUV420H1	10	57	8	0.90931	0.10026	-0.90931	0.998872
STK31	9	62	5	0.47646	0.29023	-0.47646	0.985311
PADI6	9	64	6	0.85251	0.10359	-0.85251	0.984682
SCMH1	10	354	4	-1.1529	0.10383	1.1529	0.983677
FBXL19	10	61	7	1.0692	0.10622	-1.0692	0.973794
MLLT6	10	422	2	-0.58124	0.10633	0.58124	0.973344
JMJD6	10	486	2	-0.44962	0.1064	0.44962	0.973058
SUV39H1	10	63	6	0.81313	0.10675	-0.81313	0.971632
SMARCE1	9	66	7	1.5276	0.10703	-1.5276	0.970494
YWHAQ	8	68	7	0.58778	0.10844	-0.58778	0.96481
WIZ	10	65	7	1.2274	0.10888	-1.2274	0.963052
USP3	9	283	4	-0.040458	0.11001	0.040458	0.958568
SIN3A	10	70	7	0.6909	0.11692	-0.6909	0.932111
CCDC101	9	431	4	-0.42111	0.11864	0.42111	0.925769
HDAC5	9	297	4	-0.43964	0.12101	0.43964	0.917179
PHF11	9	428	3	-0.77916	0.1254	0.77916	0.901702
MECP2	9	342	4	-0.17014	0.12556	0.17014	0.901149
AFF4	10	476	2	-0.42911	0.1268	0.42911	0.896881
SMARCA2	10	72	7	1.0624	0.12758	-1.0624	0.894217
PCGF3	9	350	3	-1.1629	0.13212	1.1629	0.879031
CHD8	10	73	7	1.4463	0.13277	-1.4463	0.8769
DOT1L	10	74	7	1.6425	0.13569	-1.6425	0.867452
CECR2	10	75	6	1.2991	0.19249	-1.2991	0.86742
UBE2E1	10	76	6	0.95147	0.23731	-0.95147	0.861539
SFMBT2	10	77	7	0.76843	0.13786	-0.76843	0.860562
YWHAB	10	470	2	-0.37885	0.1379	0.37885	0.860436
HDAC9	10	79	7	1.169	0.14077	-1.169	0.85149
KDM4B	9	82	4	0.1093	0.49441	-0.1093	0.849551
PHC1	8	453	3	-0.50931	0.1445	0.50931	0.840132
ERCC6	10	259	4	-0.33009	0.14671	0.33009	0.83354
POLE3	10	80	5	0.49945	0.47611	-0.49945	0.83283
PHF7	10	81	7	1.2095	0.14783	-1.2095	0.830237
AEBP2	8	482	1	-0.82929	0.14894	0.82929	0.826989
CDY2A	10	324	4	-0.27117	0.14951	0.27117	0.82533
HCFC2	10	429	2	-0.34324	0.15228	0.34324	0.817357
PHF1	8	83	5	1.2065	0.40413	-1.2065	0.815735
BRPF1	9	316	2	-0.29191	0.15309	0.29191	0.815053
FXR2	9	252	4	-0.57894	0.15576	0.57894	0.807544
TBL1XR1	9	87	5	1.0934	0.16167	-1.0934	0.791371
TDRD1	9	427	4	-0.41015	0.16232	0.41015	0.789628
POLD3	10	446	2	-0.19272	0.16562	0.19272	0.780887
SIRT5	9	90	5	0.20382	0.1676	-0.20382	0.775726
MTA1	10	85	7	0.45746	0.16874	-0.45746	0.772782
KANSL1	8	93	5	1.009	0.17	-1.009	0.769551
NUP98	10	86	8	1.0026	0.17106	-1.0026	0.766852
CBX4	9	227	4	-0.053435	0.17234	0.053435	0.763614
BMI1	10	88	8	0.66686	0.39162	-0.66686	0.762833
PRMT9	10	89	7	1.1597	0.1741	-1.1597	0.759201
HDAC10	8	384	4	-0.133	0.1748	0.133	0.757459
GATAD2A	10	414	4	-0.55418	0.17657	0.55418	0.753083
MGA	9	455	3	-0.29067	0.17679	0.29067	0.752542
KAT8	10	91	6	0.81452	0.17922	-0.81452	0.746614
NCOA5	10	305	3	-0.35932	0.17954	0.35932	0.745839
SUV420H2	9	417	3	-0.55518	0.18007	0.55518	0.744559
AFF1	9	471	2	-0.38126	0.18022	0.38126	0.744197
RTF1	9	370	3	-0.41573	0.18048	0.41573	0.743571
KDM7A	10	430	1	-0.31129	0.1808	0.31129	0.742802
SIRT1	9	97	7	1.1412	0.18238	-1.1412	0.739023
SMYD2	9	98	6	1.0129	0.18442	-1.0129	0.734192
TDRD10	10	94	7	0.71645	0.18619	-0.71645	0.730044
INO80D	10	282	4	-0.30864	0.18723	0.30864	0.727625
SFMBT1	10	95	5	0.61319	0.18825	-0.61319	0.725265
PRMT8	9	253	3	-0.43186	0.1888	0.43186	0.723998
RING1	8	224	3	-0.61282	0.19227	0.61282	0.716088
MDC1	10	96	8	0.73224	0.19288	-0.73224	0.714713
SKP1	9	104	6	1.0875	0.19434	-1.0875	0.711438
FXR1	10	99	8	0.75083	0.19587	-0.75083	0.708032
USP21	10	100	8	0.32676	0.19647	-0.32676	0.706704
NAA50	10	101	6	1.0502	0.19701	-1.0502	0.705512
NCOA1	10	78	3	-0.21892	0.19735	0.21892	0.704763
KAT5	9	454	3	-0.41064	0.19791	0.41064	0.703532
MSL2	10	103	7	0.95573	0.48893	-0.95573	0.700841
SETD8	10	132	4	-0.55494	0.2006	0.55494	0.697669
ACTL6A	9	437	2	-0.55153	0.20087	0.55153	0.697085
BRWD1	9	106	7	1.1546	0.20619	-1.1546	0.685732
SUPT5H	10	489	2	-0.63466	0.20978	0.63466	0.678236
RNF20	8	113	6	1.0752	0.21033	-1.0752	0.677099
HAT1	8	379	3	-0.59997	0.21053	0.59997	0.676686
CBX1	7	118	5	0.40305	0.1839	-0.40305	0.675985
CHD1	10	105	6	0.91138	0.21501	-0.91138	0.667541
REST	9	67	4	-0.75459	0.21503	0.75459	0.667501
PHF3	10	107	7	0.76959	0.21555	-0.76959	0.666452
CHD5	10	108	5	0.32529	0.21658	-0.32529	0.664382
PCGF6	9	309	4	-0.37301	0.21803	0.37301	0.661484
SMARCD3	10	109	7	0.83652	0.40335	-0.83652	0.65813
BAZ2A	10	380	4	-0.51951	0.22103	0.51951	0.655549
HDAC11	9	116	6	0.46107	0.22256	-0.46107	0.652553
WHSC1	10	110	6	0.69306	0.30352	-0.69306	0.647953
JMJD8	10	111	6	0.72858	0.2252	-0.72858	0.647432
MCRS1	8	121	5	0.84228	0.22546	-0.84228	0.64693
ZNHIT1	10	112	7	0.47337	0.21963	-0.47337	0.646141
NRBF2	8	84	3	-0.64345	0.22595	0.64345	0.645988
SUV39H2	10	114	5	0.33605	0.22741	-0.33605	0.64197
MEAF6	10	115	7	1.2789	0.22891	-1.2789	0.640335
MYSM1	9	243	4	-0.11385	0.23014	0.11385	0.638008
WAC	10	117	7	1.3082	0.23163	-1.3082	0.635205
CHD2	10	120	6	1.1806	0.23463	-1.1806	0.629616
SND1	8	127	5	0.59579	0.23652	-0.59579	0.626132
TET2	9	122	7	0.97809	0.23745	-0.97809	0.624428
ANP32A	10	322	4	-0.34128	0.23772	0.34128	0.623934
DPF2	8	130	6	0.71739	0.18165	-0.71739	0.621747
PRMT3	8	307	3	-0.11889	0.24262	0.11889	0.615073
RBBP4	9	125	4	0.1014	0.24647	-0.1014	0.608236
SUDS3	10	124	6	1.0928	0.26629	-1.0928	0.604744
SIRT2	10	229	3	-0.47214	0.24846	0.47214	0.604744
TDRKH	10	301	4	-0.41675	0.24992	0.41675	0.602199
HDAC7	10	451	3	-0.44568	0.25121	0.44568	0.599963
RCOR3	7	147	4	0.27219	0.39447	-0.27219	0.598272
CBX2	8	141	4	0.21584	0.11222	-0.21584	0.595748
SAP130	8	142	5	0.80046	0.25476	-0.80046	0.593869
YEATS2	10	129	6	1.0369	0.4053	-1.0369	0.592677
TET1	9	133	7	0.4448	0.25631	-0.4448	0.591234
WHSC1L1	9	134	5	1.1119	0.25641	-1.1119	0.591065
NAA30	10	131	7	0.69929	0.25682	-0.69929	0.590371
JARID2	10	447	2	-0.55488	0.25801	0.55488	0.588363
CTR9	9	280	2	-0.11816	0.25825	0.11816	0.58796
HINFP	10	135	6	0.84776	0.26059	-0.84776	0.584042
WDR5	10	136	7	0.55898	0.26078	-0.55898	0.583726
DNMT3L	9	366	2	-0.16667	0.26086	0.16667	0.583593
UCHL5	9	138	5	0.52164	0.26101	-0.52164	0.583343
DR1	10	487	1	-0.77676	0.26144	0.77676	0.582628
MBD1	10	137	7	0.60349	0.26217	-0.60349	0.581417
ARID1B	10	396	3	-0.28115	0.26306	0.28115	0.579945
KAT7	8	452	2	-0.50588	0.26404	0.50588	0.57833
BRPF3	9	119	4	-0.90141	0.26817	0.90141	0.57159
NAT6	10	140	5	0.17095	0.26927	-0.17095	0.569812
MORF4L2	10	143	7	0.60807	0.27176	-0.60807	0.565814
MBD3L1	10	144	5	0.089362	0.21666	-0.089362	0.562503
BRD8	10	145	5	0.73696	0.37461	-0.73696	0.562345
TADA3	9	238	3	-0.21678	0.27454	0.21678	0.561394
DPF3	7	198	3	-0.01197	0.2751	0.01197	0.560509
ATAD3B	10	146	7	0.70964	0.27884	-0.70964	0.554645
TAF12	9	177	4	-0.99383	0.27903	0.99383	0.554349
TDRD7	7	157	5	0.98192	0.28198	-0.98192	0.549782
SMARCAD1	9	438	3	-0.35795	0.28208	0.35795	0.549628
NSL1	10	312	4	-0.022664	0.28358	0.022664	0.547324
PADI3	10	148	5	0.16805	0.36888	-0.16805	0.540487
RNF40	9	407	4	-0.5146	0.28821	0.5146	0.540291
CDC73	10	149	5	0.43996	0.22073	-0.43996	0.539102
EAF1	10	150	6	0.55104	0.45348	-0.55104	0.537707
NCOA7	10	151	5	0.18411	0.48295	-0.18411	0.535481
LCORL	9	320	4	-0.47035	0.29405	0.47035	0.531579
INO80E	8	256	3	-0.085589	0.29518	0.085589	0.529913
SMARCAL1	9	152	6	0.58482	0.29553	-0.58482	0.529398
KDM1B	10	406	3	-0.40673	0.29557	0.40673	0.52934
MBD6	10	420	3	-0.21225	0.29629	0.21225	0.528283
SAP30	8	158	4	0.19812	0.022103	-0.19812	0.52799
KANSL3	9	153	6	1.0782	0.34406	-1.0782	0.525842
CENPA	10	235	4	-0.2594	0.29826	0.2594	0.525405
DNMT3A	18	128	10	0.31617	0.29929	-0.31617	0.523908
KDM5D	9	389	4	-0.37612	0.30031	0.37612	0.52243
RUVBL1	10	426	3	-0.40927	0.30128	0.40927	0.52103
CSNK2A1	9	123	4	-0.34898	0.30378	0.34898	0.517441
SMARCD2	9	155	4	0.087668	0.30431	-0.087668	0.516684
L3MBTL1	8	162	5	1.1807	0.30606	-1.1807	0.514193
ACTR8	10	154	7	0.83951	0.30654	-0.83951	0.513513
ARID3A	10	415	4	-0.12075	0.30688	0.12075	0.513031
KDM2B	10	410	2	-0.34221	0.30715	0.34221	0.512649
NAA40	10	156	7	0.71866	0.30964	-0.71866	0.509143
SMARCA4	9	69	3	-0.17831	0.3108	0.17831	0.507519
MBTD1	9	160	5	0.54684	0.3134	-0.54684	0.503901
TRIM24	10	365	4	-0.42327	0.31385	0.42327	0.503278
CXXC5	10	408	3	-0.28667	0.31447	0.28667	0.502421
PRMT6	10	159	5	0.11878	0.43197	-0.11878	0.501814
UHRF1BP1	9	464	3	-0.2071	0.31716	0.2071	0.498722
CTBP1	9	163	5	0.25641	0.47013	-0.25641	0.495108
JMJD1C	9	165	5	0.35619	0.32427	-0.35619	0.489093
KANSL2	9	166	6	1.1703	0.32514	-1.1703	0.48793
MLLT1	8	460	2	-0.22117	0.32803	0.22117	0.484086
CDY1	10	362	4	-0.20018	0.33015	0.20018	0.481289
NCOA2	9	167	6	0.88292	0.33141	-0.88292	0.479634
SMYD3	10	164	5	0.43041	0.41431	-0.43041	0.479569
KMT2C	10	434	3	-0.3789	0.33834	0.3789	0.470647
UHRF1BP1L	9	168	6	0.34955	0.33934	-0.34955	0.469365
MBD3L5	6	425	1	-0.28091	0.34522	0.28091	0.461904
HDAC8	10	348	4	-0.25002	0.34955	0.25002	0.456491
PHF2	8	172	5	0.77494	0.34988	-0.77494	0.456081
HLTF	10	277	4	-0.026307	0.35431	0.026307	0.450617
WDR48	8	450	3	-0.3809	0.35443	0.3809	0.45047
BCOR	9	174	3	0.010974	0.36006	-0.010974	0.443625
BRD3	10	169	6	0.93728	0.36423	-0.93728	0.438624
HDAC6	10	170	4	0.093616	0.36567	-0.093616	0.436911
CHRAC1	8	441	3	-0.33712	0.36603	0.33712	0.436483
BAZ1B	10	171	6	0.43113	0.36702	-0.43113	0.43531
KDM3A	9	176	4	0.063815	0.20514	-0.063815	0.43381
MORF4L1	10	173	5	0.70945	0.37169	-0.70945	0.429819
ING4	10	418	3	-0.43958	0.37247	0.43958	0.428909
HDAC2	10	71	4	-0.30974	0.3782	0.30974	0.422278
ZBTB33	10	175	5	0.059272	0.47234	-0.059272	0.42159
HSPBAP1	10	330	3	-0.0486	0.37957	0.0486	0.420708
SUPT16H	9	477	2	-0.60601	0.38048	0.60601	0.419668
TFDP1	9	480	2	-0.23909	0.3837	0.23909	0.416008
BPTF	10	395	5	-0.26601	0.38382	0.26601	0.415872
BCORL1	9	336	3	-0.31767	0.3849	0.31767	0.414652
USP22	10	178	7	0.39269	0.38555	-0.39269	0.413919
AIRE	10	179	5	0.32035	0.28348	-0.32035	0.413053
FANCL	9	185	5	0.20301	0.29463	-0.20301	0.40878
ING2	10	180	7	0.38125	0.39086	-0.38125	0.407979
CHD6	10	443	3	-0.20564	0.3953	0.20564	0.403073
GTF3C4	10	181	5	0.30436	0.085025	-0.30436	0.40202
ARID3C	10	456	3	-0.23691	0.39959	0.23691	0.398385
ING5	9	225	4	-0.40045	0.40109	0.40045	0.396758
SETD7	7	199	5	0.46917	0.40155	-0.46917	0.39626
GATAD2B	10	182	6	0.58684	0.40188	-0.58684	0.395904
KDM5A	10	421	4	-0.20431	0.40303	0.20431	0.394663
TAF9	10	183	6	0.38614	0.40317	-0.38614	0.394512
PHF12	9	189	6	0.66273	0.34965	-0.66273	0.39393
EAF2	10	184	7	0.49442	0.405	-0.49442	0.392545
TTF2	10	186	6	0.39777	0.40964	-0.39777	0.387598
DNMT3B	10	375	4	-0.26958	0.40981	0.26958	0.387417
NCOR1	10	187	5	0.5443	0.3119	-0.5443	0.386285
SIRT3	9	261	4	-0.0032028	0.4129	0.0032028	0.384155
L3MBTL3	9	194	6	0.54509	0.016606	-0.54509	0.381199
ZBTB4	9	195	5	0.49041	0.46192	-0.49041	0.381189
MLLT10	9	267	3	-0.28917	0.42001	0.28917	0.37674
BTAF1	9	403	4	-0.56463	0.42247	0.56463	0.374204
INO80B	10	190	5	0.4071	0.42261	-0.4071	0.37406
CDK2AP1	10	191	5	0.4062	0.21549	-0.4062	0.373814
PHF13	9	409	3	-0.17321	0.42708	0.17321	0.369491
CHD4	10	192	7	0.43494	0.42739	-0.43494	0.369176
CHD7	9	201	4	0.17497	0.11149	-0.17497	0.369064
NAT8B	9	358	4	-0.19475	0.43048	0.19475	0.366047
TDRD6	10	193	6	0.58781	0.43069	-0.58781	0.365835
KDM6B	10	412	3	-0.20174	0.43516	0.20174	0.361351
KDM4C	9	204	5	0.39196	0.43529	-0.39196	0.361221
SIRT6	10	439	4	-0.0921	0.43564	0.0921	0.360872
YEATS4	10	197	5	0.48169	0.12982	-0.48169	0.357783
MBD3L3	10	244	5	-0.032998	0.4392	0.032998	0.357338
MTA3	10	353	5	-0.049402	0.44236	0.049402	0.354224
NAA16	10	200	6	0.43382	0.17464	-0.43382	0.353743
CARM1	10	435	4	-0.32196	0.44509	0.32196	0.351552
PADI4	9	208	5	0.97173	0.1799	-0.97173	0.350451
PRR15L	9	209	5	0.33112	0.44717	-0.33112	0.349527
ZNHIT3	10	202	5	0.071131	0.0074174	-0.071131	0.346363
ACTR5	9	210	6	0.76482	0.45089	-0.76482	0.345929
ARID1A	10	203	5	0.27265	0.45145	-0.27265	0.34539
CDYL2	9	102	3	-0.28688	0.4533	0.28688	0.343614
HDAC1	9	289	4	-0.0036681	0.45612	0.0036681	0.340921
DPY30	9	213	5	1.2828	0.45647	-1.2828	0.340588
HDAC4	10	205	6	0.58383	0.45681	-0.58383	0.340264
YWHAZ	9	214	5	0.48492	0.45708	-0.48492	0.340008
EZH1	9	215	6	1.2872	0.45883	-1.2872	0.338348
ENY2	10	206	6	0.91466	0.46137	-0.91466	0.335951
HDGFL1	10	207	6	0.44805	0.46139	-0.44805	0.335932
SPHK2	9	466	2	-0.25269	0.46355	0.25269	0.333903
ATAD5	9	216	4	0.071796	0.39749	-0.071796	0.332977
SAP18	9	218	6	0.38233	0.46754	-0.38233	0.330181
DZIP3	10	212	5	0.2925	0.32095	-0.2925	0.328892
EPC1	9	221	6	0.75006	0.47562	-0.75006	0.32274
BRD1	9	92	4	-0.29155	0.47706	0.29155	0.321427
ELL	10	345	5	-0.074937	0.4791	0.074937	0.319574
ZZZ3	8	337	3	-0.21639	0.48043	0.21639	0.31837
ATAD3C	10	219	6	0.70914	0.35523	-0.70914	0.316224
PCGF1	10	220	6	0.42508	0.48544	-0.42508	0.313864
PRAME	10	241	5	-0.0064633	0.48831	0.0064633	0.311304
PWWP2A	10	222	4	0.11364	0.48978	-0.11364	0.309999
RAD54L2	9	413	4	-0.36532	0.49169	0.36532	0.308309
HELLS	10	223	5	0.37888	0.44611	-0.37888	0.308229
SETDB1	9	472	1	-0.2889	0.49627	0.2889	0.304282
SFN	10	226	6	0.58853	0.49952	-0.58853	0.301447
PHF23	8	436	3	-0.18946	0.89551	0.18946	0.299262
ASH2L	9	485	2	-0.10012	0.50264	0.10012	0.298743
ARID5B	9	230	4	0.096607	0.50572	-0.096607	0.29609
RNF2	9	231	5	0.62717	0.22292	-0.62717	0.294778
MLLT3	8	328	3	-0.20002	0.6912	0.20002	0.292702
ZNHIT6	9	232	4	0.11547	0.51095	-0.11547	0.291622
PADI2	9	233	4	0.15092	0.51162	-0.15092	0.291052
PHF20L1	9	211	3	-0.012902	0.45333	0.012902	0.287561
TDRD9	9	236	5	0.3498	0.051734	-0.3498	0.285084
RAD54L	9	459	3	-0.17747	0.95266	0.17747	0.283371
RNF17	10	234	5	0.34463	0.52102	-0.34463	0.283146
USP11	10	399	3	-0.31547	0.85399	0.31547	0.281034
BRD7	10	237	6	0.53891	0.52663	-0.53891	0.278494
LEO1	9	242	6	0.44823	0.53124	-0.44823	0.274709
ZBTB38	10	239	5	0.33176	0.53373	-0.33176	0.272678
MBD4	9	378	3	-0.13233	0.79929	0.13233	0.272678
TAF6L	10	240	5	0.34268	0.49997	-0.34268	0.272012
PHF8	8	257	5	0.44632	0.53497	-0.44632	0.271671
CRB2	9	246	4	0.0048279	0.54166	-0.0048279	0.266273
MSL3	9	247	5	0.59885	0.54209	-0.59885	0.265929
ATRX	9	248	5	0.54946	0.31544	-0.54946	0.265472
ATXN7	9	249	4	0.06419	0.29212	-0.06419	0.264593
UHRF1	10	245	5	0.74743	0.40826	-0.74743	0.264162
EZH2	10	401	4	-0.23193	0.86246	0.23193	0.262632
GPS2	10	250	4	0.07813	0.5486	-0.07813	0.260744
CBX6	10	251	5	0.41186	0.55156	-0.41186	0.258407
BRDT	9	139	4	-0.18249	0.26375	0.18249	0.25682
VPS72	8	272	4	0.1967	0.55494	-0.1967	0.255754
RYBP	10	458	3	-0.085898	0.95808	0.085898	0.255691
TET3	9	255	5	0.32259	0.35356	-0.32259	0.254472
BRD4	10	254	6	0.61093	0.55839	-0.61093	0.253062
SUPT3H	8	276	4	0.045763	0.40987	-0.045763	0.251084
ELL3	10	258	6	0.27166	0.43409	-0.27166	0.248444
GMPS	10	260	4	0.052454	0.56667	-0.052454	0.24667
ACTL6B	9	265	5	0.50591	0.56999	-0.50591	0.244133
PRDM2	19	228	11	0.42444	0.57389	-0.42444	0.241171
SMYD4	10	263	6	0.58283	0.57584	-0.58283	0.239698
MBD3L2	10	266	5	0.19552	0.33893	-0.19552	0.238832
EED	10	360	3	-0.0091992	0.77675	0.0091992	0.238418
PCGF5	10	269	5	0.15849	0.58129	-0.15849	0.235607
USP16	10	270	6	0.48154	0.58143	-0.48154	0.235503
PAXIP1	10	271	6	0.31322	0.58198	-0.31322	0.235092
PHF10	10	273	5	0.19503	0.58339	-0.19503	0.234041
SCML2	10	274	5	0.3747	0.58377	-0.3747	0.233758
MTA2	10	275	6	0.45362	0.58504	-0.45362	0.232814
TDRD3	9	279	5	0.66285	0.59113	-0.66285	0.228317
SETD2	10	278	6	0.41124	0.59318	-0.41124	0.226814
PAGR1	9	281	5	0.43527	0.071312	-0.43527	0.226557
L3MBTL4	10	287	4	-0.21196	0.62288	0.21196	0.223415
PHF14	9	284	5	0.47715	0.60142	-0.47715	0.220822
JADE2	9	346	2	-0.2168	0.73445	0.2168	0.213696
WDR61	10	262	3	-0.12589	0.571	0.12589	0.213454
TDRD12	9	288	4	0.14595	0.61207	-0.14595	0.213199
PADI1	10	285	5	0.13898	0.61337	-0.13898	0.212277
CSNK2A2	10	161	3	-0.15373	0.32127	0.15373	0.211832
MTF2	10	286	6	0.57617	0.61566	-0.57617	0.210659
ATAD2	8	292	4	0.41888	0.61637	-0.41888	0.210159
ARID4A	8	295	5	0.45279	0.62552	-0.45279	0.203759
MBIP	10	357	3	-0.17821	0.76574	0.17821	0.201791
EHMT2	9	294	5	0.83408	0.25315	-0.83408	0.198685
PHC3	10	424	3	-0.015488	0.89674	0.015488	0.198521
CHORDC1	9	478	2	-0.026092	0.97787	0.026092	0.197623
HCFC1	9	298	5	0.60067	0.63688	-0.60067	0.195942
WDR82	10	264	3	-0.12088	0.57603	0.12088	0.195813
KAT2B	10	291	6	0.37487	0.64178	-0.37487	0.192614
CBX5	10	293	5	0.46046	0.64603	-0.46046	0.189747
KDM1A	10	126	5	-0.0043908	0.25145	0.0043908	0.187514
SUZ12	10	405	3	-0.23464	0.86957	0.23464	0.187194
CRB1	10	296	5	0.26394	0.50765	-0.26394	0.185406
L3MBTL2	9	310	5	0.54535	0.653	-0.54535	0.185087
SMARCC2	10	299	6	0.4144	0.65316	-0.4144	0.18498
ELL2	10	300	5	0.26377	0.65458	-0.26377	0.184037
SMARCD1	10	302	5	0.3019	0.65704	-0.3019	0.182408
CCNT1	9	311	5	0.95956	0.65739	-0.95956	0.182177
PHC2	10	303	5	0.16467	0.66202	-0.16467	0.179129
NRIP1	9	314	4	0.30504	0.66225	-0.30504	0.178978
CBX3	10	304	6	0.83732	0.66476	-0.83732	0.177335
KMT2E	10	306	6	0.3884	0.66832	-0.3884	0.175016
TAF5L	10	308	6	0.31332	0.66891	-0.31332	0.174632
NAT10	9	40	3	-0.042003	0.072572	0.042003	0.172838
KAT6A	10	457	3	-0.052764	0.95725	0.052764	0.171224
PHF5A	9	321	3	0.038294	0.67938	-0.038294	0.167887
HDAC3	9	381	4	-0.25553	0.80617	0.25553	0.165579
TFPT	10	315	5	0.073971	0.68417	-0.073971	0.164836
CXXC4	9	323	5	0.32211	0.099165	-0.32211	0.164227
PCGF2	10	317	5	0.11303	0.69249	-0.11303	0.159586
PBRM1	9	327	4	0.17466	0.038139	-0.17466	0.158559
USP7	10	319	5	0.097574	0.69645	-0.097574	0.15711
TRRAP	9	329	5	0.56831	0.44523	-0.56831	0.152322
NFRKB	10	325	5	0.33863	0.70447	-0.33863	0.152137
TBL1Y	10	326	5	0.33879	0.709	-0.33879	0.149354
PHF20	9	338	4	0.13206	0.35711	-0.13206	0.144317
UBE2A	9	339	3	0.026962	0.35523	-0.026962	0.143972
CBX8	9	341	5	0.33045	0.24343	-0.33045	0.142728
E2F6	9	343	5	0.27853	0.72356	-0.27853	0.140525
DNMT1	10	332	2	0.089505	0.72414	-0.089505	0.140177
JADE1	10	344	5	0.51866	0.25883	-0.51866	0.133069
ACTR6	9	349	4	0.10778	0.18675	-0.10778	0.132597
KMT2B	8	359	4	0.36209	0.74315	-0.36209	0.128924
ASH1L	9	351	4	0.023514	0.34297	-0.023514	0.128054
NAT14	9	352	5	0.34476	0.047397	-0.34476	0.126377
ZNHIT2	8	363	4	0.36101	0.75635	-0.36101	0.121277
MSL1	9	356	4	0.18609	0.3182	-0.18609	0.11985
ZCWPW2	10	462	3	-0.10722	0.96553	0.10722	0.119272
YWHAH	10	355	5	0.055789	0.49516	-0.055789	0.118091
NCOA3	10	196	5	-0.045426	0.43699	0.045426	0.116339
UBE2B	10	461	3	-0.084532	0.9617	0.084532	0.112326
MRGBP	10	361	5	0.25188	0.77722	-0.25188	0.109456
DDX59	10	364	5	0.28373	0.78261	-0.28373	0.106455
SSRP1	6	394	3	0.3604	0.7844	-0.3604	0.105462
SIRT7	9	367	4	0.060759	0.78574	-0.060759	0.104721
CDYL	7	386	3	0.2401	0.78666	-0.2401	0.104213
RBBP7	10	368	5	0.11381	0.50867	-0.11381	0.101434
MAX	10	369	5	0.20206	0.31914	-0.20206	0.100891
LCOR	10	371	5	0.2689	0.7938	-0.2689	0.100289
SMYD1	10	372	5	0.096807	0.7966	-0.096807	0.0987597
NAT8	10	373	5	0.18484	0.79831	-0.18484	0.0978284
CHD9	10	374	5	0.23557	0.22699	-0.23557	0.0965953
ZCWPW1	8	419	2	-0.039744	0.87371	0.039744	0.0959123
KAT2A	10	377	5	0.067686	0.80366	-0.067686	0.0949276
GLYR1	8	391	4	0.30483	0.40759	-0.30483	0.0930673
SMARCA1	9	388	4	0.15824	0.81484	-0.15824	0.0889277
SMARCB1	9	390	4	0.13534	0.81708	-0.13534	0.0877354
KDM4A	10	387	5	0.069923	0.8255	-0.069923	0.0832829
C11orf30	9	397	4	0.3781	0.83181	-0.3781	0.0799759
LRWD1	10	392	5	0.20132	0.83544	-0.20132	0.0780847
NCOR2	9	400	3	0.06372	0.22587	-0.06372	0.073812
TADA1	10	398	4	0.016456	0.85044	-0.016456	0.0703563
SMARCC1	9	376	4	-0.021143	0.79459	0.021143	0.0593889
BAZ2B	10	488	2	-0.058482	0.99227	0.058482	0.0580912
DCAF4	9	432	4	0.15601	0.14639	-0.15601	0.0436875
EP400	10	433	4	0.063871	0.91149	-0.063871	0.0402481
DPF1	8	440	3	0.16881	0.91161	-0.16881	0.0401909
PHF21B	9	449	3	0.082995	0.93589	-0.082995	0.0287752
NSD1	10	463	3	0.02798	0.25412	-0.02798	0.0151533
NOC2L	9	469	3	0.033282	0.96884	-0.033282	0.0137479

## Sheet: 28Positive hits P<0.05 LFC>0.58
Supplemental Table 1: Analysis of CRISPR screen using single-guide (sg) RNAs targeting epigenetic modifiers.
id	num	neg|score	neg|p-value	neg|fdr	neg|rank	neg|goodsgrna	neg|lfc	pos|score	pos|p-value	pos|fdr	pos|rank	pos|goodsgrna	pos|lfc
FBXO11	10	0.9772	0.98467	0.998517	483	1	2.9705	5.9e-12	4.96e-06	0.001225	1	9	2.9705
KMT2D	9	0.25069	0.5244	0.996352	256	2	2.857	4.96e-07	4.96e-06	0.001225	2	7	2.857
PRMT5	10	0.80816	0.92776	0.997707	445	3	0.67356	6.18e-06	4.47e-05	0.007353	3	6	0.67356
NCOA6	10	0.20586	0.47165	0.98738	231	1	2.9869	8.33e-06	7.44e-05	0.007353	5	9	2.9869
CXXC1	9	0.69215	0.8631	0.997707	422	1	1.9432	7.97e-06	7.44e-05	0.007353	4	7	1.9432
ZNF217	10	0.74781	0.89948	0.997707	430	1	2.284	2.21e-05	0.00021334	0.017565	6	8	2.284
SETD1B	10	0.99704	0.99717	0.998517	493	0	2.6156	0.00033816	0.0027735	0.190257	7	8	2.6156
CREBBP	10	0.17499	0.43101	0.973793	211	2	1.7285	0.00036682	0.0030811	0.190257	8	8	1.7285
NAA20	10	0.03152	0.12597	0.938174	62	3	1.0312	0.00054726	0.004381	0.217892	9	5	1.0312
ATXN7L3	10	0.70454	0.87948	0.997707	426	2	1.503	0.00055204	0.0044108	0.217892	10	8	1.503
RUVBL2	10	0.92359	0.96678	0.997707	472	2	2.6832	0.00065573	0.0050558	0.22705	11	8	2.6832
YWHAG	10	0.86859	0.94816	0.997707	459	1	1.2703	0.00083796	0.0064847	0.248074	12	9	1.2703
SET	10	0.063371	0.21507	0.938174	104	4	1.2271	0.00091902	0.0070304	0.248074	13	6	1.2271
RCOR1	10	0.86365	0.94668	0.997707	456	2	0.98235	0.0010164	0.0076556	0.252124	15	6	0.98235
ATAD1	9	0.9986	0.99852	0.998517	494	0	1.5893	0.0013965	0.0091341	0.282016	16	9	1.5893
NAA15	10	0.22137	0.49112	0.98738	242	2	1.5875	0.0018018	0.01221	0.340005	17	7	1.5875
MBD3	10	0.98565	0.98794	0.998517	484	1	1.7224	0.0021316	0.014076	0.36597	19	9	1.7224
KDM5B	9	0.85942	0.93559	0.997707	455	2	1.85	0.0032756	0.019533	0.472572	21	7	1.85
CTBP2	9	0.37205	0.64353	0.997707	317	1	1.4561	0.0036301	0.021111	0.474042	22	8	1.4561
PRMT1	10	0.035545	0.13865	0.938174	69	4	0.82079	0.0040486	0.024872	0.530294	23	6	0.82079
UTY	9	0.92077	0.9628	0.997707	471	1	0.90205	0.0046057	0.025805	0.530294	25	8	0.90205
PHB2	10	0.18913	0.44985	0.978241	226	3	2.1202	0.0044062	0.026837	0.530294	24	7	2.1202
TAF1A	10	0.5212	0.7738	0.997707	379	4	0.86274	0.0049589	0.029764	0.565517	26	5	0.86274
HMG20B	8	0.95529	0.96542	0.997707	481	1	1.5583	0.0076436	0.03933	0.670977	30	7	1.5583
INO80	9	0.33011	0.60507	0.997707	292	3	1.1795	0.0073019	0.039389	0.670977	29	6	1.1795
JMJD4	10	0.75028	0.90062	0.997707	433	3	0.65796	0.0071879	0.041295	0.679984	28	5	0.65796
SRCAP	10	0.48783	0.74992	0.997707	365	1	1.3359	0.0080599	0.04581	0.691696	32	8	1.3359
INO80C	10	0.92724	0.96835	0.997707	474	1	1.0126	0.008149	0.046206	0.691696	33	7	1.0126

## Sheet: 18Negativehits P<0.05 LFC<-0.58
Supplemental Table 1: Analysis of CRISPR screen using single-guide (sg) RNAs targeting epigenetic modifiers.
id	num	neg|score	neg|p-value	neg|fdr	neg|rank	neg|goodsgrna	neg|lfc	pos|score	pos|p-value	pos|fdr	pos|rank	pos|goodsgrna	pos|lfc
KMT2A	10	0.0022705	0.014076	0.642722	11	7	-1.5809	0.96595	0.98967	0.999965	484	1	-1.5809
MBD3L4	4	0.0060845	0.020833	0.652682	20	3	-1.4932	0.14879	0.30908	0.95602	188	1	-1.4932
MBD2	9	0.0055642	0.028831	0.749613	18	7	-1.4431	0.94944	0.98193	0.999965	481	2	-1.4431
TAF10	9	0.0018773	0.01101	0.604303	9	5	-1.3602	0.64561	0.86762	0.999965	411	4	-1.3602
SUPT7L	10	1.88e-05	0.00015381	0.065564	1	8	-1.317	0.89431	0.97064	0.999965	468	2	-1.317
BRD2	9	0.0041534	0.022461	0.652682	15	6	-1.2845	0.26472	0.57215	0.999965	268	3	-1.2845
MEN1	9	7.12e-05	0.00048127	0.065564	3	9	-1.2593	0.99993	0.99995	0.999965	493	0	-1.2593
KDM2A	10	0.0023116	0.014314	0.642722	12	7	-1.2137	0.94073	0.9852	0.999965	479	2	-1.2137
SUPT4H1	9	0.00011291	0.00071942	0.071078	5	6	-1.2098	0.95592	0.98379	0.999965	483	2	-1.2098
FBXO10	9	7.89e-05	0.00053088	0.065564	4	8	-1.2041	0.40923	0.71266	0.999965	334	1	-1.2041
JADE3	8	0.010197	0.047467	0.860539	27	5	-1.1822	0.76767	0.91345	0.999965	442	1	-1.1822
ARID5A	9	0.00093159	0.0058099	0.47835	6	7	-1.1417	0.91252	0.97327	0.999965	474	2	-1.1417
KDM5C	8	4.89e-05	0.00038204	0.065564	2	8	-1.0143	0.99995	0.99997	0.999965	494	0	-1.0143
RSF1	9	0.0040491	0.022074	0.652682	14	7	-0.8838	0.99881	0.99883	0.999965	492	0	-0.8838
TRDMT1	10	0.0014806	0.010057	0.604303	8	8	-0.83097	0.99694	0.99778	0.999965	491	1	-0.83097
UHRF2	10	0.0057121	0.031213	0.770956	19	8	-0.8282	0.60496	0.86248	0.999965	402	2	-0.8282
SMYD5	9	0.0054074	0.028276	0.749613	17	6	-0.82267	0.6628	0.87667	0.999965	416	2	-0.82267
BAZ1A	9	0.009048	0.043716	0.860539	24	7	-0.67723	0.77988	0.9285	0.999965	445	2	-0.67723

## Sheet: GO_BP_postive regulators
Supplemental Table 1: Analysis of CRISPR screen using single-guide (sg) RNAs targeting epigenetic modifiers.
Term	Overlap	P-value	Adjusted P-value	Old P-value	Old Adjusted P-value	Odds Ratio	Combined Score	Genes
Regulation Of DNA-templated Transcription (GO:0006355)	17/1922	3.63189e-11	1.07867e-08	0	0	14.6571	352.337	INO80C;MBD3;KMT2D;PRMT5;CREBBP;SET;CTBP2;SRCAP;NCOA6;CXXC1;INO80;PHB2;RUVBL2;ZNF217;NAA15;ATXN7L3;RCOR1
Positive Regulation Of Nucleic Acid-Templated Transcription (GO:1903508)	9/557	4.06905e-08	4.45127e-06	0	0	16.7899	285.718	INO80C;MBD3;CREBBP;NCOA6;RUVBL2;CXXC1;INO80;NAA15;ATXN7L3
Histone H3-K4 Methylation (GO:0051568)	4/26	4.49623e-08	4.45127e-06	0	0	151.136	2556.84	KMT2D;NCOA6;SETD1B;CXXC1
Histone Lysine Methylation (GO:0034968)	4/32	1.0753e-07	7.9841e-06	0	0	118.714	1904.83	KMT2D;NCOA6;SETD1B;CXXC1
Regulation Of Cellular Response To Stress (GO:0080135)	5/107	3.55402e-07	2.03358e-05	0	0	42.3487	628.879	INO80C;CREBBP;RUVBL2;INO80;ATXN7L3
