# Supplementary material for: The H3K4 methyltransferase KMT2D is an essential cofactor for GATA1 at erythroid gene enhancers
Source: Research Square preprint supplement (doi:10.21203/rs.3.rs-7853319/v1), 2025-10-22
Supplement: Supplementary file 8 [file a865a8979a1cf96efd0f2773.xlsx]

## Sheet: GO_D0_down
Supplemental Table 3: Gene Ontology analysis and Transcription factors occupancy analysis for the de-regulated genes between wild type and KMT2D-sgRNA2 mediated knockout (KMT2D KO) HUDEP-2 cells.
Term	Overlap	P-value	Adjusted P-value	Old P-value	Old Adjusted P-value	Odds Ratio	Combined Score	Genes
Positive Regulation Of Cell Death (GO:0010942)	12/50	3.53e-12	5.63e-09	0	0	23.1043	609.241	NTRK1;HBZ;RARG;HBG2;HBG1;BNIP3;ITGB2;HBB;CIDEB;HBD;HBA1;SNCA
Hydrogen Peroxide Catabolic Process (GO:0042744)	8/20	1.5e-10	1.19e-07	0	0	48.1245	1088.73	HBZ;PRDX2;HBM;HBG2;HBG1;HBB;HBA1;HBD
Oxygen Transport (GO:0015671)	6/10	1.46e-09	7.76e-07	0	0	107.536	2187.75	HBZ;HBG2;HBG1;HBB;HBA1;HBD
Carbon Dioxide Transport (GO:0015670)	6/11	3.18e-09	1.27e-06	0	0	86.0247	1683.3	HBZ;HBG2;HBG1;HBB;HBA1;HBD
Gas Transport (GO:0015669)	6/15	3.28e-08	1.05e-05	0	0	47.7818	823.394	HBZ;HBG2;HBG1;HBB;HBA1;HBD
One-Carbon Compound Transport (GO:0019755)	7/35	4.82e-07	0.000128	0	0	17.9662	261.339	HBZ;HBG2;HBG1;HBB;SLC4A1;HBD;HBA1
Cellular Response To Hypoxia (GO:0071456)	9/72	7.37e-07	0.000165	0	0	10.3235	145.777	EGLN3;RGCC;BNIP3;HMOX1;RORA;ADAM8;AQP3;NDRG1;AQP1
Cellular Response To Decreased Oxygen Levels (GO:0036294)	9/73	8.3e-07	0.000165	0	0	10.1617	142.279	EGLN3;RGCC;BNIP3;HMOX1;RORA;ADAM8;AQP3;NDRG1;AQP1
Regulation Of Cell Death (GO:0010941)	8/59	1.64e-06	0.00029	0	0	11.301	150.549	HBZ;HBG2;HBG1;HBB;CIDEB;HBD;HBA1;SNCA
Actin Crosslink Formation (GO:0051764)	4/11	1.16e-05	0.00185637	0	0	40.6643	461.968	BAIAP2L2;BAIAP2;GAS2L1;GAS2L2
Vascular Transport (GO:0010232)	8/83	2.18e-05	0.00315751	0	0	7.67531	82.3874	SLC7A8;LRP1;SLC6A9;SLC2A1;SLC2A4;ATP1B2;SLC29A1;SLC8A2
Transport Across Blood-Brain Barrier (GO:0150104)	8/85	2.59e-05	0.003447	0	0	7.47519	78.9331	SLC7A8;LRP1;SLC6A9;SLC2A1;SLC2A4;ATP1B2;SLC29A1;SLC8A2
Renal Water Homeostasis (GO:0003091)	4/14	3.42e-05	0.00418963	0	0	28.4606	292.695	MYO5B;AQP3;CYP4F12;AQP1
Nitrogen Compound Transport (GO:0071705)	10/163	0.000107	0.0121314	0	0	4.71891	43.1634	SLC22A4;SLC6A19;SLC6A8;SLC7A8;HBB;HBA1;SLC29A1;RHCE;AQP1;RHD
Multicellular Organismal-Level Water Homeostasis (GO:0050891)	4/19	0.000125	0.0133018	0	0	18.969	170.451	MYO5B;AQP3;CYP4F12;AQP1
Positive Regulation Of Cholesterol Efflux (GO:0010875)	4/22	0.000229	0.0227665	0	0	15.8051	132.508	LRP1;PTCH1;ABCA7;PLTP
Protein Localization To Membrane (GO:0072657)	10/192	0.000401	0.0368808	0	0	3.96111	30.9804	SPTBN4;EHD2;PTCH1;ITGB2;LRRC4;TSPAN5;ITGB7;AGRN;RAB6B;SYNE3
Negative Regulation Of Platelet-Derived Growth Factor Receptor Signaling Pathway (GO:0010642)	3/11	0.000416	0.0368808	0	0	26.5886	206.957	NDRG4;LRP1;SNCA
Amino Acid Import Across Plasma Membrane (GO:0089718)	4/27	0.000519	0.0435253	0	0	12.366	93.5364	SLC22A4;TSPO2;SLC6A9;SLC7A8
Positive Regulation Of Secretion By Cell (GO:1903532)	6/73	0.000564	0.0449732	0	0	6.39957	47.8685	ACHE;RGCC;MYO18A;FRMD4A;ADAM8;SNCA

## Sheet: GO_D3_down
Supplemental Table 3: Gene Ontology analysis and Transcription factors occupancy analysis for the de-regulated genes between wild type and KMT2D-sgRNA2 mediated knockout (KMT2D KO) HUDEP-2 cells.
Term	Overlap	P-value	Adjusted P-value	Old P-value	Old Adjusted P-value	Odds Ratio	Combined Score	Genes
Hydrogen Peroxide Catabolic Process (GO:0042744)	4/20	2.77e-09	6.66e-06	0	0	22.3139	439.689	HBZ;PRDX2;HBM;HBG2;HBG1;CAT;HBB;HBA1;HBD;HBQ1
Oxygen Transport (GO:0015671)	6/10	1.18e-06	0.00141879	0	0	33.3258	454.914	HBZ;HBG2;HBG1;HBB;HBA1;HBD
Carbon Dioxide Transport (GO:0015670)	6/11	2.5e-06	0.00200433	0	0	26.6592	343.892	HBZ;HBG2;HBG1;HBB;HBA1;HBD
Positive Regulation Of Cell Death (GO:0010942)	11/50	7.55e-06	0.00454039	0	0	6.29146	74.2025	HBZ;RARG;HBG2;HBG1;ITGB2;HBB;CIDEB;HBD;HBA1;CLU;SNCA
Gas Transport (GO:0015669)	6/15	2.33e-05	0.0112174	0	0	14.8076	157.946	HBZ;HBG2;HBG1;HBB;HBA1;HBD
Nonribosomal Peptide Biosynthetic Process (GO:0019184)	4/7	0.000111	0.0443159	0	0	29.5558	269.264	CHAC1;HAGH;GCLM;GGT1
One-Carbon Compound Transport (GO:0019755)	7/35	0.000651	0.223926	0	0	5.55378	40.7439	HBZ;HBG2;HBG1;HBB;SLC4A1;HBD;HBA1
Positive Regulation Of Hemoglobin Biosynthetic Process (GO:0046985)	3/5	0.00076	0.228635	0	0	33.2135	238.537	SLC25A37;SLC6A9;KLF4
Regulation Of Cell Death (GO:0010941)	9/59	0.000929	0.248337	0	0	4.00343	27.9498	HBZ;HBG2;HBG1;HBB;CIDEB;HBD;HBA1;CLU;SNCA
Heme Biosynthetic Process (GO:0006783)	5/19	0.00105862	0.254704	0	0	7.92136	54.2676	ALAD;ALAS2;ABCB6;UROS;HMBS
Regulation Of Hemoglobin Biosynthetic Process (GO:0046984)	3/6	0.00147138	0.293331	0	0	22.1412	144.395	SLC25A37;SLC6A9;KLF4
Glutathione Biosynthetic Process (GO:0006750)	3/6	0.00147138	0.293331	0	0	22.1412	144.395	HAGH;GCLM;GGT1
Intrinsic Apoptotic Signaling Pathway In Response To Endoplasmic Reticulum Stress (GO:0070059)	6/30	0.00158491	0.293331	0	0	5.54849	35.7724	PPP1R15A;CEBPB;DDIT3;ATP2A1;CHAC1;BBC3
Porphyrin-Containing Compound Biosynthetic Process (GO:0006779)	5/21	0.00172388	0.296261	0	0	6.93047	44.0998	ALAD;ALAS2;ABCB6;UROS;HMBS
Regulation Of Lipid Metabolic Process (GO:0019216)	8/54	0.00214136	0.343474	0	0	3.86435	23.7515	RNF213;CIDEB;IRS2;RORA;ABCA7;NR1D2;ADIPOR1;PCK1
Signal Transduction By P53 Class Mediator (GO:0072331)	6/33	0.00264721	0.398074	0	0	4.93122	29.2631	STK11;SESN2;PMAIP1;NDRG1;E2F7;PDK2
Response To Hydrogen Peroxide (GO:0042542)	7/46	0.00343194	0.485721	0	0	3.98503	22.6136	CAT;HBB;HMOX1;HBA1;CLU;AQP1;RHOB
Negative Regulation Of Lipase Activity (GO:0060192)	3/8	0.00385922	0.515848	0	0	13.2833	73.8194	RGS2;ANGPTL4;PLIN5
Cellular Response To Decreased Oxygen Levels (GO:0036294)	9/73	0.00419278	0.530939	0	0	3.12538	17.1096	EGLN3;RGCC;HMOX1;PMAIP1;RORA;ADAM8;NDRG1;AQP1;CPEB4
Positive Regulation Of Cellular Catabolic Process (GO:0031331)	14/146	0.00450453	0.541895	0	0	2.36255	12.7641	PLK2;NPRL3;IRS2;FOXO3;MLXIPL;FLCN;STK11;TP53INP1;TRIM58;ADAM8;ULK1;OPTN;PLIN5;SNCA
Nitrogen Compound Transport (GO:0071705)	15/163	0.00492257	0.563985	0	0	2.2584	12.001	ARRDC4;SLC22A4;SLC36A1;SLC6A19;ARRDC2;ARRDC3;HBB;HBA1;AQP1;RHD;TXNIP;SLC29A1;RHCE;VAMP2;ABCG2
Cellular Response To Glucocorticoid Stimulus (GO:0071385)	45399	0.00530978	0.580697	0	0	6.81701	35.7089	ZFP36;KLF9;PCK1;AQP1
Intrinsic Apoptotic Signaling Pathway (GO:0097193)	11/105	0.00582117	0.608945	0	0	2.60277	13.3945	PPP1R15A;STK11;CDKN1A;CEBPB;DDIT3;PMAIP1;CIDEB;ATP2A1;CHAC1;PDK2;BBC3
Regulation Of Glucose Metabolic Process (GO:0010906)	45440	0.0064799	0.64961	0	0	4.81943	24.2853	PMAIP1;IRS2;RORA;ADIPOR1;PDK2
Negative Regulation Of Growth (GO:0045926)	12/124	0.00763674	0.651625	0	0	2.38358	11.6195	DNAJB2;CDKN2D;FLCN;STK11;CDKN1A;BTG1;BCL6;SESN2;CAPRIN2;MT1X;PTPRJ;PRDM11
Regulation Of Inclusion Body Assembly (GO:0090083)	45361	0.00774886	0.651625	0	0	9.4871	46.1093	DNAJB2;DNAJA4;HSPA2
Regulation Of Phospholipase Activity (GO:0010517)	45361	0.00774886	0.651625	0	0	9.4871	46.1093	RGS2;LRP1;SNCA
Positive Regulation Of Transcription From RNA Polymerase II Promoter In Response To Endoplasmic Reticulum Stress (GO:1990440)	45361	0.00774886	0.651625	0	0	9.4871	46.1093	CEBPB;CREB3L3;DDIT3
Regulation Of Release Of Cytochrome C From Mitochondria (GO:0090199)	6/41	0.00801777	0.651625	0	0	3.80249	18.3512	PMAIP1;CIDEB;BMF;NOL3;CLU;BBC3
Negative Regulation Of Cell Growth (GO:0030308)	12/125	0.00812499	0.651625	0	0	2.36237	11.3696	DNAJB2;CDKN2D;FLCN;STK11;CDKN1A;BTG1;BCL6;SESN2;CAPRIN2;ULK1;PTPRJ;PRDM11

## Sheet: GO_D0_up
Supplemental Table 3: Gene Ontology analysis and Transcription factors occupancy analysis for the de-regulated genes between wild type and KMT2D-sgRNA2 mediated knockout (KMT2D KO) HUDEP-2 cells.
Term	Overlap	P-value	Adjusted P-value	Old P-value	Old Adjusted P-value	Odds Ratio	Combined Score	Genes
Regulation Of Axonogenesis (GO:0050770)	8/42	8.67e-07	0.00168068	0	0	12.7371	177.79	ROBO2;EPHA4;SIPA1L1;MCF2;KIF13B;LRP4;PLXNB1;PLXNC1
Negative Regulation Of JUN Kinase Activity (GO:0043508)	4/12	5.07e-05	0.0284704	0	0	26.806	265.089	DUSP10;GSTP1;PTPN22;DUSP16
Negative Regulation Of Cell Adhesion (GO:0007162)	8/72	5.42e-05	0.0284704	0	0	6.75622	66.3591	EPHA4;PTPRC;SEMA4D;MDK;FZD4;SNAI2;PLXNB1;PLXNC1
Negative Regulation Of Neuron Projection Development (GO:0010977)	7/54	5.87e-05	0.0284704	0	0	8.03476	78.2788	EFNB2;EPHA4;PTPRS;MCF2;LRP4;DENND5A;ITM2C
Negative Regulation Of Cytokine Production (GO:0001818)	12/178	0.000124	0.0425394	0	0	3.93027	35.3469	PYCARD;SRGN;CD274;CD84;TWSG1;RPS6KA5;PTPRC;ANXA1;CR1;TMSB4X;PTPN22;TRIB2
Regulation Of JUN Kinase Activity (GO:0043506)	6/43	0.000132	0.0425394	0	0	8.72869	77.9951	DUSP10;GSTP1;MAP3K10;PTPN22;TNFRSF11A;DUSP16
Negative Regulation Of Response To Wounding (GO:1903035)	12/178	0.00107176	0.273195	0	0	10.205	69.7867	EPHA4;PTPRS;MDK;CASK
Regulation Of Cytokine Production (GO:0001817)	10/167	0.00112716	0.273195	0	0	3.44533	23.3871	SRGN;TWSG1;RPS6KA5;PTPRC;ANXA1;BTN3A1;SNAI2;BTN3A3;BTN2A3P;LITAF
ATP Transport (GO:0015867)	3/13	0.0015648	0.277	0	0	16.0381	103.606	CR1;SLC25A23;SLC25A24
Axon Guidance (GO:0007411)	9/149	0.00185548	0.277	0	0	3.47072	21.8295	EFNB2;ROBO2;EPHA4;ALCAM;RPS6KA5;SEMA4D;NRCAM;PLXNB1;PLXNC1
Negative Regulation Of Cell Projection Organization (GO:0031345)	5/50	0.00225722	0.277	0	0	5.96195	36.3299	EFNB2;EPHA4;PTPRS;DENND5A;ITM2C
Negative Regulation Of MAP Kinase Activity (GO:0043407)	5/51	0.00246524	0.277	0	0	5.83204	35.0241	RGS2;DUSP10;GSTP1;PTPN22;DUSP16
Actin Cytoskeleton Reorganization (GO:0031532)	5/53	0.0029225	0.277	0	0	5.58847	32.6105	SIPA1L1;ANXA1;CXADR;PLEK;S1PR2
Glycoprotein Metabolic Process (GO:0009100)	5/53	0.0029225	0.277	0	0	5.58847	32.6105	GCNT1;MAN1C1;ST3GAL4;ST8SIA4;FBXO44
Lymphocyte Mediated Immunity (GO:0002449)	3/16	0.00294039	0.277	0	0	12.3351	71.9042	CR2;CR1;BTN3A3
Prostanoid Metabolic Process (GO:0006692)	3/16		0.277	0	0	12.3351	71.9042	HPGDS;HPGD;GSTP1
Negative Regulation Of Amyloid Precursor Protein Biosynthetic Process (GO:0042985)	2/5	0.00328946	0.277	0	0	35.5562	203.276	ITM2A;ITM2C
Negative Regulation Of Axon Regeneration (GO:0048681)	2/5	0.00328946	0.277	0	0	35.5562	203.276	EPHA4;PTPRS
Positive Regulation Of Fever Generation (GO:0031622)	7/105	0.00328946	0.277	0	0	35.5562	203.276	PTGER3;TNFRSF11A
Negative Regulation Of MAPK Cascade (GO:0043409)	7/105	0.00338372	0.277	0	0	3.84337	21.8641	P2RX7;EPHA4;RGS2;PTPRC;DUSP10;GSTP1;DUSP16
Negative Regulation Of JNK Cascade (GO:0046329)	4/34	0.00344766	0.277	0	0	7.14026	40.4857	DUSP10;GSTP1;PTPN22;DUSP16
Positive Regulation Of Leukocyte Adhesion To Vascular Endothelial Cell (GO:1904996)	2/5	0.00352192	0.277	0	0	11.4535	64.6979	MDK;ST3GAL4;CHST4
Cellular Response To Peptide (GO:1901653)	5/56	0.00371895	0.277	0	0	5.25893	29.4201	EPHA4;GRIN2A;CASP4;PTPN22;VIM
Antigen Processing And Presentation Of Peptide Antigen Via MHC Class I (GO:0002474)	3/18	0.00416887	0.277	0	0	10.6894	58.5789	ERAP2;HFE;TAP1
T Cell Activation (GO:0042110)	7/111	0.00459798	0.277	0	0	3.62052	19.4862	CD84;CXADR;PTPRC;MDK;KIF13B;PTPN22;SOX4
AV Node Cell To Bundle Of His Cell Communication (GO:0086067)	2/6	0.00487395	0.277	0	0	26.6658	141.965	GJC1;CXADR
Antigen Processing And Presentation Of Endogenous Peptide Antigen Via MHC Class I (GO:0019885)	2/6	0.00487395	0.277	0	0	26.6658	141.965	ERAP2;TAP1
Negative Regulation Of Neuron Projection Regeneration (GO:0070571)	2/6	0.00487395	0.277	0	0	26.6658	141.965	EPHA4;PTPRS
Negative Regulation Of p38MAPK Cascade (GO:1903753)	2/6	0.00487395	0.277	0	0	26.6658	141.965	DUSP10;PTPN22
Positive Regulation Of Leukocyte Tethering Or Rolling (GO:1903238)	2/6	0.00487395	0.277	0	0	26.6658	141.965	ST3GAL4;CHST4

## Sheet: GO_D3_up
Supplemental Table 3: Gene Ontology analysis and Transcription factors occupancy analysis for the de-regulated genes between wild type and KMT2D-sgRNA2 mediated knockout (KMT2D KO) HUDEP-2 cells.
Term	Overlap	P-value	Adjusted P-value	Old P-value	Old Adjusted P-value	Odds Ratio	Combined Score	Genes
Rap1 signaling pathway	27/210	8.97e-07	0.000258	0	0	3.20089	44.5716	RALB;CSF1;ADCY3;RASGRP2;ACTB;ACTG1;SIPA1L1;RASSF5;HRAS;VASP;VAV3;MAGI1;PRKCB;F2R;VAV1;MAPK12;VAV2;MAPK11;PRKD3;KIT;RAPGEF1;LCP2;PFN1;RAPGEF5;BCAR1;F2RL3;FGFR1
Proteoglycans in cancer	25/205	5.88e-06	0.000846	0	0	3.00677	36.2158	ITPR1;ITPR2;IQGAP1;CBL;ACTB;ACTG1;CCND1;TIMP3;FLNA;FLNB;PRKACB;HRAS;VAV3;PRKCB;CAV2;FZD6;RRAS2;MSN;VAV1;MAPK12;VAV2;MAPK11;HCLS1;PTPN6;FGFR1
Salmonella infection	27/249	2.24e-05	0.00214724	0	0	2.63314	28.1954	CYFIP1;CXCL8;AHNAK;ARPC1B;SNX33;ACTB;PIK3CG;ACTG1;PYCARD;CASP7;CASP4;FLNA;FLNB;HRAS;WASF3;S100A10;VPS18;MLKL;RHOH;ARPC5;NFKB1;TIRAP;MAPK12;TNFRSF1A;MAPK11;PTPRC;PFN1
Leukocyte transendothelial migration	16/114	5.04e-05	0.00362629	0	0	3.51362	34.7716	VASP;VAV3;PRKCB;ACTN1;NCF4;MSN;RHOH;CYBA;ACTB;VAV1;MAPK12;ACTG1;VAV2;MAPK11;RASSF5;BCAR1
Adherens junction	12/71	7e-05	0.00403345	0	0	4.36635	41.7713	FER;PTPRB;SMAD3;ACTN1;WAS;PTPN6;IQGAP1;ACTB;WASF3;ACTG1;TGFBR2;FGFR1
Pathogenic Escherichia coli infection	21/197	0.000224	0.0107303	0	0	2.57186	21.6188	ARHGEF11;CYFIP1;CXCL8;WIPF1;ARPC1B;F2R;ARPC5;ACTB;NFKB1;TIRAP;MAPK12;ACTG1;TNFRSF1A;PYCARD;MAPK11;CASP7;CASP4;HCLS1;PTPN6;WASF3;MYO1G
Herpes simplex virus 1 infection	40/498	0.000296	0.01187	0	0	1.89547	15.4025	ZNF551;ZNF253;ZNF671;ZNF792;ZNF670;ZNF471;ZNF790;ZNF470;ZFP82;ZNF607;ZNF229;ZNF823;ZNF547;ZNF425;ZNF347;IKBKE;ZNF443;ZNF641;ZIK1;ZNF286A;ZNF440;ZNF285;ZNF284;APAF1;ZNF480;TAP1;ZNF77;NFKB1;TNFRSF1A;HLA-E;TRAF3;ZNF836;TRAF5;ZNF316;ZNF799;ZNF433;ZNF256;ZNF530;ZNF772;ZFP28
Regulation of actin cytoskeleton	22/218	0.000348	0.01187	0	0	2.4196	19.2653	VAV3;CYFIP1;ACTN1;ARPC1B;F2R;RRAS2;MSN;IQGAP1;ARPC5;IQGAP2;ACTB;VAV1;VAV2;ACTG1;FGD3;DIAPH1;TMSB4X;SPATA13;PFN1;HRAS;BCAR1;FGFR1
Chemokine signaling pathway	20/192	0.000423	0.01187	0	0	2.50403	19.4544	LYN;VAV3;CXCL8;PRKCB;PRKCD;WAS;ADCY3;ARRB1;RASGRP2;NFKB1;PIK3CG;VAV1;VAV2;PREX1;GRK3;DOCK2;PRKACB;CCR4;HRAS;BCAR1
Yersinia infection	16/137	0.000442	0.01187	0	0	2.8423	21.9523	VAV3;CXCL8;WIPF1;ARPC1B;WAS;ARPC5;ACTB;NFKB1;VAV1;MAPK12;ACTG1;VAV2;PYCARD;MAPK11;LCP2;BCAR1
Platelet activation	15/124	0.000453	0.01187	0	0	2.95654	22.7618	LYN;VASP;F2R;ITPR1;ITPR2;ADCY3;RASGRP2;ACTB;PIK3CG;MAPK12;ACTG1;MAPK11;LCP2;PRKACB;F2RL3
Pathways in cancer	41/531	0.000557	0.0133711	0	0	1.81497	13.5991	NOTCH2;SPI1;CXCL8;RALB;MAX;EPAS1;LAMC3;GSTP1;PTGER3;MGST1;ADCY3;MGST2;CSF2RB;LAMC1;IL2RG;RASGRP2;CBL;CASP7;CCND1;RASSF5;PRKACB;HRAS;APPL1;STAT5A;ARHGEF11;NQO1;IL4R;SMAD3;APAF1;DAPK1;PRKCB;FZD6;F2R;NFKB1;TGFBR2;TRAF3;IL7;TRAF5;KIT;F2RL3;FGFR1
Lipid and atherosclerosis	21/215	0.000722	0.0145911	0	0	2.33102	16.8601	LYN;VAV3;ERO1A;CXCL8;APAF1;NCF4;ITPR1;CYBA;VLDLR;VAV1;NFKB1;TIRAP;MAPK12;VAV2;TNFRSF1A;PYCARD;MAPK11;CASP7;TRAF3;HRAS;IKBKE
Focal adhesion	20/201	0.000759	0.0145911	0	0	2.37839	17.0863	VASP;VAV3;PRKCB;CAV2;LAMC3;ACTN1;LAMC1;ACTB;VAV1;VAV2;ACTG1;DIAPH1;CCND1;RAPGEF1;ZYX;FLNA;FLNB;COL9A2;HRAS;BCAR1
Shigellosis	23/246	0.00076	0.0145911	0	0	2.22267	15.9638	CXCL8;ACTN1;ARPC1B;PRKCD;ITPR1;ITPR2;ARPC5;ACTB;NFKB1;HK2;MAPK12;ACTG1;TNFRSF1A;PYCARD;DIAPH1;MAPK11;RRAGD;CASP4;TRAF5;HCLS1;PRKCQ;PFN1;BCAR1
Fc gamma R-mediated phagocytosis	12/97	0.00134232	0.0241618	0	0	3.02662	20.0161	LYN;VASP;VAV3;PTPRC;PRKCB;ARPC1B;PRKCD;WAS;ARPC5;VAV1;WASF3;VAV2
Vibrio cholerae infection	8/50	0.00161982	0.0274417	0	0	4.07439	26.1798	ERO1A;ADCY3;KDELR3;ATP6V0E2;PRKACB;ACTB;ACTG1;PDIA4
AGE-RAGE signaling pathway in diabetic complications	12/100	0.0017501	0.0280016	0	0	2.92298	18.5553	STAT5A;DIAPH1;MAPK11;SMAD3;CXCL8;CCND1;PRKCB;PRKCD;HRAS;NFKB1;MAPK12;TGFBR2
T cell receptor signaling pathway	12/104	0.00244689	0.0370897	0	0	2.7953	16.808	VAV3;MAPK11;PTPRC;PRKCQ;LCP2;PTPN6;NFKBIE;HRAS;NFKB1;VAV1;MAPK12;VAV2
NOD-like receptor signaling pathway	17/181	0.00335392	0.0482965	0	0	2.2256	12.6806	NLRX1;CXCL8;PRKCD;ITPR1;TRPV2;ITPR2;CYBA;ANTXR2;NFKB1;MAPK12;PYCARD;P2RX7;MAPK11;TRAF3;CASP4;TRAF5;IKBKE

## Sheet: GSEA_D0
Supplemental Table 3: Gene Ontology analysis and Transcription factors occupancy analysis for the de-regulated genes between wild type and KMT2D-sgRNA2 mediated knockout (KMT2D KO) HUDEP-2 cells.
ID	Description	setSize	enrichmentScore	NES	pvalue	p.adjust	qvalue	rank	leading_edge	core_enrichment
HALLMARK_HEME_METABOLISM	HALLMARK_HEME_METABOLISM	198	-0.784046	-2.5912	1e-10	6.263e-07	5.78947e-07	2903	tags=53%, list=8%, signal=49%	996/8273/1193/1510/54977/10840/51218/440/5715/286/51257/66008/7037/9429/3792/3792/2729/54/669/80344/80344/210/2623/51274/10171/9258/9258/5526/7390/63891/6886/535/23351/10661/56180/55532/51094/25893/847/54498/5886/6708/10107/10107/10107/10107/10107/10107/10107/10107/10107/10107/10107/10107/10107/10107/10107/10107/10107/10107/10107/10107/10107/10107/10107/10107/27429/4778/119/1870/1870/4354/64122/5…
ZHENG_BOUND_BY_FOXP3	ZHENG_BOUND_BY_FOXP3	490	0.516305	1.73941	9.83102e-10	3.07858e-06	2.84582e-06	5596	tags=34%, list=16%, signal=29%	22807/301/57507/10365/5733/120/7114/28951/54491/84456/6711/51338/26191/4214/23233/6003/2322/5987/5987/5987/5987/5987/5987/5987/5788/5788/7903/23258/5788/5788/8477/3709/9693/7456/3936/84159/9840/1236/55843/7155/79668/2892/5991/84912/5734/3588/23499/22837/200132/55619/1179/253832/51176/8835/399/30011/2494/64092/7048/54149/8204/9445/259230/1848/5987/5987/5987/5987/5987/5987/5987/2820/9920/9920/8439/…
JAATINEN_HEMATOPOIETIC_STEM_CELL_UP	JAATINEN_HEMATOPOIETIC_STEM_CELL_UP	311	0.559038	1.82319	3.52014e-09	5.74373e-06	5.30946e-06	5997	tags=38%, list=17%, signal=32%	374/3490/1359/81618/84941/27306/6414/216/10788/79047/2322/57460/10451/51309/25925/2078/84327/139886/284/80221/8099/4439/4439/4439/4439/4439/4439/4439/4439/50859/7718/5954/100505687/23576/79956/2120/3815/5325/9306/8835/55225/51351/79070/135293/51186/253827/54360/8204/10765/1393/4602/6328/137392/55353/23243/860/79921/7552/9747/162073/1829/51809/9200/22881/6856/55179/83879/6788/11001/84707/4232/5763…
CHYLA_CBFA2T3_TARGETS_UP	CHYLA_CBFA2T3_TARGETS_UP	385	0.53751	1.76812	3.66835e-09	5.74373e-06	5.30946e-06	3552	tags=17%, list=10%, signal=16%	400668/8288/6709/10235/3248/288/7852/946/2124/8573/9454/59339/6711/8522/9452/57134/5899/397/27128/81563/3568/11031/5027/5480/51101/4616/29967/23433/94274/8477/3936/219736/79668/9459/10493/2892/134265/84912/10865/64778/143888/117583/8895/79895/8612/55013/8835/10783/211/1992/84343/5874/1051/23348/388/9926/3067/285671/9057/7171/9498/2585/613/149465/53346/92370/10279/3417/3212/5795/28966/8495/84706/2…
WELCH_GATA1_TARGETS	WELCH_GATA1_TARGETS	25	-0.912687	-2.13803	3.32252e-08	4.16179e-05	3.84713e-05	2431	tags=85%, list=7%, signal=79%	286/7037/210/4097/7390/10661/4778/7975/2040/3046/5498/23456/3145/7389/2993/161882/2039/3043/212/3040/6521/3050
SHEN_SMARCA2_TARGETS_UP	SHEN_SMARCA2_TARGETS_UP	428	0.500936	1.66752	4.81457e-08	5.02561e-05	4.64564e-05	7547	tags=45%, list=21%, signal=36%	23683/5899/57045/51315/55819/23499/49855/9306/10966/28978/374354/2776/966/8287/6879/2332/57496/6655/54665/8450/64924/167227/29994/29994/10787/51742/50618/6093/10464/5412/65084/4763/8804/10618/8195/8195/8195/9874/8491/23300/3188/23201/9946/10771/4801/25950/8726/9581/11196/55900/23064/23548/5509/7326/55832/90/23473/29066/56271/55032/81488/81847/5000/23369/51552/79624/91746/91746/9741/9702/90806/229…
TORCHIA_TARGETS_OF_EWSR1_FLI1_FUSION_DN	TORCHIA_TARGETS_OF_EWSR1_FLI1_FUSION_DN	317	0.54092	1.76604	7.24716e-08	6.48414e-05	5.99389e-05	4470	tags=45%, list=12%, signal=40%	3487/5696/5696/5696/5696/5696/5696/5696/5696/946/6659/5696/5696/5696/5696/5696/5696/5696/5696/28951/83938/7431/84456/23683/5698/5698/5698/5698/5698/5698/5698/5698/5698/5698/5698/5698/5698/5698/5698/5698/8543/5698/5698/5698/5698/5698/5698/5698/5698/5698/5698/5698/5698/5698/5698/5698/5698/9452/10788/1266/5899/5696/5696/5696/5696/5696/5696/5696/5696/5698/5698/5698/5698/5698/5698/5698/5698/65108/8879…
CHARAFE_BREAST_CANCER_LUMINAL_VS_MESENCHYMAL_DN	CHARAFE_BREAST_CANCER_LUMINAL_VS_MESENCHYMAL_DN	461	0.500898	1.67951	1.08037e-07	8.45798e-05	7.81849e-05	3755	tags=29%, list=10%, signal=26%	3490/87/301/81029/5328/81618/9397/120/5552/4240/7431/5997/23683/123920/5698/5698/5698/5698/5698/5698/5698/5698/5698/5698/5698/5698/5698/5698/5698/5698/6711/2950/5698/5698/5698/5698/5698/5698/5698/5698/5698/5698/5698/5698/5698/5698/5698/5698/170954/170954/170954/170954/170954/170954/170954/170954/118429/8905/6591/2119/2200/7204/5698/5698/5698/5698/5698/5698/5698/5698/11031/9469/57045/651746/231/23…
JAATINEN_HEMATOPOIETIC_STEM_CELL_DN	JAATINEN_HEMATOPOIETIC_STEM_CELL_DN	229	-0.54387	-1.81745	1.23017e-07	8.5606e-05	7.91336e-05	3373	tags=25%, list=9%, signal=23%	10444/81606/10261/10261/23710/221895/1510/23533/64581/2841/51257/4051/7027/4860/669/122416/9046/4688/10628/10661/7057/58191/154075/919/2212/9332/1512/3821/81027/54997/1032/948/6095/3689/3669/57125/6398/51327/2993/79838/728/116448/28984/4635/645/51312/4118/3557/3043/915/6622/6007/8991/3042/212/3045/360/3039/6521/3050/3047
CHARAFE_BREAST_CANCER_LUMINAL_VS_BASAL_DN	CHARAFE_BREAST_CANCER_LUMINAL_VS_BASAL_DN	446	0.494631	1.65447	1.57931e-07	9.8912e-05	9.14336e-05	3380	tags=33%, list=9%, signal=31%	3490/5696/5696/5696/5696/5696/5696/5696/5696/87/301/8900/4311/5328/81618/120/5696/5696/5696/5696/5696/5696/5696/5696/4240/5997/23683/688/5698/5698/5698/5698/5698/5698/5698/5698/5698/5698/5698/5698/5698/5698/5698/5698/6711/2950/5698/5698/5698/5698/5698/5698/5698/5698/5698/5698/5698/5698/5698/5698/5698/5698/83595/83595/6591/5899/5696/5696/5696/5696/5696/5696/5696/5696/5698/5698/5698/5698/5698/5698/…
OSMAN_BLADDER_CANCER_UP	OSMAN_BLADDER_CANCER_UP	393	0.501752	1.65833	2.66117e-07	0.000151517	0.000140061	6789	tags=44%, list=19%, signal=36%	3490/1836/1050/10365/8942/51338/26191/8522/5788/5788/5788/5788/23433/139886/6892/6892/6892/6892/6892/8895/51320/2207/25832/6645/6645/6645/6645/8835/5295/80267/56987/55784/8204/26060/9926/6892/6892/6892/6892/6892/64393/7171/84888/55255/9765/719/4012/4090/54665/157/79982/10645/143/8767/56242/10087/5922/1997/1200/3958/7298/8826/9522/3140/55851/2923/6789/6782/55031/10618/9474/91404/10746/143458/55729…
WANG_RESPONSE_TO_GSK3_INHIBITOR_SB216763_UP	WANG_RESPONSE_TO_GSK3_INHIBITOR_SB216763_UP	361	0.506361	1.66496	6.38662e-07	0.000333328	0.000308126	4839	tags=48%, list=13%, signal=42%	6709/58528/7852/946/143686/2650/2124/83938/54491/26191/1520/5788/5788/5788/5788/51315/2760/55843/55819/80221/202/80022/214/10475/3588/10385/49855/84163/2696/79895/51351/6812/7773/64940/84519/51326/51326/51326/51326/7644/8832/23355/64393/85315/7127/84765/9765/23657/401494/55529/11046/11046/256987/5337/474170/474170/474170/474170/567/567/58480/58480/9844/144110/6773/112483/4257/11179/22990/474170/4…
VALK_AML_CLUSTER_7	VALK_AML_CLUSTER_7	26	-0.865861	-2.04372	1.43218e-06	0.000689981	0.000637814	2431	tags=49%, list=7%, signal=46%	286/3757/3792/3792/10826/6886/10107/10107/10107/10107/10107/10107/10107/10107/10107/10107/10107/10107/10107/10107/10107/10107/10107/10107/10107/10107/10107/10107/10107/10107/2996/7168/6535/5909/6710/6536/6006/7145/6513/4635/23762/10158/8991/3050
VALK_AML_CLUSTER_8	VALK_AML_CLUSTER_8	25	-0.859031	-2.01234	4.1873e-06	0.00187322	0.00173159	2431	tags=81%, list=7%, signal=75%	286/66008/9429/80344/80344/10826/6886/56180/5087/2235/10098/4601/6535/999/2993/2994/6006/7145/23762/6622/8991
REACTOME_FCERI_MEDIATED_MAPK_ACTIVATION	REACTOME_FCERI_MEDIATED_MAPK_ACTIVATION	83	0.677714	1.87721	5.81685e-06	0.00242873	0.0022451	4594	tags=19%, list=13%, signal=17%	2206/9402/3725/4214/28797/10451/2207/5594/5335/5062/5599/4067/5595/5601/6416/28815
YAMAZAKI_TCEB3_TARGETS_UP	YAMAZAKI_TCEB3_TARGETS_UP	166	0.574009	1.74286	6.26507e-06	0.00245238	0.00226697	6726	tags=57%, list=19%, signal=47%	3487/1192/1192/1192/1192/1192/1192/1192/5552/4240/2752/463/6690/2034/59274/11328/3915/537/7301/7791/7791/5954/5780/10809/23576/5641/22837/4026/3815/57713/1287/23348/6615/83693/567/567/81539/8445/3727/23071/2923/2790/57182/5723/10905/6836/6836/813/388403/2131/1191/80031/10138/203522/1515/23193/5045/11014/5660/2778/1471/6566/6566/11015/56990/10943/92912/2768/10959/8997/801/9709/80206/6238/4043/2907…
RICKMAN_METASTASIS_DN	RICKMAN_METASTASIS_DN	254	-0.491067	-1.6654	7.04437e-06	0.0024858	0.00229786	3380	tags=36%, list=9%, signal=33%	5698/5698/5698/5698/5698/5698/5698/5698/5698/5698/5698/5698/5698/5698/5698/5698/5698/5698/5698/5698/5698/5698/5698/5698/5698/5698/5698/5698/5698/5698/5698/5698/6890/6890/6890/6890/6890/6890/6890/6890/5698/5698/5698/5698/5698/5698/5698/5698/8879/6890/6890/6890/6890/6890/6890/6890/6890/8519/6300/6890/6890/6890/6890/6890/6890/6890/6890/114609/10809/3428/2207/10487/1890/259230/7171/613/10645/2021/854…
REACTOME_RHO_GTPASE_CYCLE	REACTOME_RHO_GTPASE_CYCLE	446	0.465987	1.55866	7.49305e-06	0.0024858	0.00229786	4581	tags=20%, list=13%, signal=18%	87/6709/4168/120/7431/90627/93663/6711/1535/10788/5364/397/7204/84033/10451/94240/139818/347902/23433/7456/537/55843/9826/9459/50619/51291/71/5881/55619/752/1080/64857/10928/399/5295/4646/51566/29/29/29/23221/10810/143872/23348/388/64283/55704/7171/8476/5290/23075/613/393/396/6655/5337/58480/58480/6811/80728/115703/1362/10787/50618/1829/8826/390/6093/4001/10160/57630/7919/7919/7919/7919/7919/7919…
HALLMARK_MYC_TARGETS_V2	HALLMARK_MYC_TARGETS_V2	58	-0.722457	-1.98163	7.54114e-06	0.0024858	0.00229786	7610	tags=75%, list=21%, signal=59%	5245/7374/6949/10196/5347/3336/8886/23160/26354/80324/9238/51388/54663/10244/2193/23082/10528/83743/81887/4839/6832/51154/6573/79711/79711/705/56342/10514/5036/6652/51491/23481/79050/79050/27340/10171/6723/92856/3099/23223/9136/4609/56915/9064/1844
IVANOVA_HEMATOPOIESIS_MATURE_CELL	IVANOVA_HEMATOPOIESIS_MATURE_CELL	290	-0.473396	-1.62846	8.06481e-06	0.0025255	0.00233455	4180	tags=27%, list=12%, signal=24%	23236/57614/344838/126626/22824/56913/29946/81532/1633/55907/10553/80856/56648/51733/127262/23052/6717/9792/54977/440/162989/51257/66008/3792/3792/54/669/90355/122416/83606/6510/51274/535/55300/7057/116844/56180/55532/51094/1512/54498/116151/6708/1870/1870/4354/64122/80148/5498/1647/896/80853/79628/4601/2180/8418/3029/63027/1032/148534/254102/80315/4259/6556/272/9911/3689/50865/6710/9091/10422/26…
GABRIELY_MIR21_TARGETS	GABRIELY_MIR21_TARGETS	289	0.511041	1.65586	9.13623e-06	0.00272477	0.00251876	6830	tags=45%, list=19%, signal=37%	1836/8611/688/4214/192670/23527/389432/202/10475/23576/22837/6733/55603/55619/65267/23328/65059/3652/5295/2043/51566/135293/7048/5286/2776/9926/64839/2820/138639/63939/113263/1386/254251/22902/5337/285440/27244/23243/11259/50618/26137/81575/55031/64864/10097/253461/57563/23365/57187/10746/83666/6774/5926/23168/5980/23548/9451/23200/54629/122830/55727/55727/10725/25780/55740/11064/23022/23394/5758…
REN_ALVEOLAR_RHABDOMYOSARCOMA_DN	REN_ALVEOLAR_RHABDOMYOSARCOMA_DN	406	0.471673	1.5576	1.22532e-05	0.00342828	0.00316908	6497	tags=47%, list=18%, signal=39%	3490/87/10981/1192/1192/1192/1192/1192/1192/1192/301/5328/10365/1462/4240/2034/64764/7358/2200/11031/54918/5480/4925/10512/3920/9060/3915/537/7791/7791/56654/6892/6892/6892/6892/6892/10493/9358/64778/3588/123803/123803/4026/837/4323/55013/3340/10487/5159/58472/4017/7048/6892/6892/6892/6892/6892/7171/57175/8439/4478/23593/23075/396/55033/2182/8450/55742/3417/23180/5578/6249/10092/1200/64750/8826/1…
CHYLA_CBFA2T3_TARGETS_DN	CHYLA_CBFA2T3_TARGETS_DN	239	-0.497064	-1.67248	1.25899e-05	0.00342828	0.00316908	5053	tags=34%, list=14%, signal=29%	10107/10107/10107/10107/10107/10107/10107/10107/54749/2968/2968/2968/2968/2968/2968/3934/85462/7486/344838/51016/51016/162417/22936/29895/56895/64116/5296/9985/9985/116987/83463/9455/1510/440/286/66008/3792/3792/5169/23266/63898/200942/84883/91409/140685/9258/9258/284161/3931/5526/57613/9796/7036/23589/55532/90668/90668/6866/4000/148398/10107/10107/10107/10107/10107/10107/10107/10107/10107/10107/…
PASINI_SUZ12_TARGETS_DN	PASINI_SUZ12_TARGETS_DN	310	0.491816	1.60391	1.51031e-05	0.00378602	0.00349977	3162	tags=17%, list=9%, signal=16%	3487/87/1192/1192/1192/1192/1192/1192/1192/301/1462/29957/29957/6659/3725/7431/761/123920/170954/170954/170954/170954/170954/170954/170954/170954/1525/10512/139818/8609/112616/7791/7791/1435/10769/10493/90843/1465/4026/1030/5912/4323/79026/9306/10487/6646/1808/79070/1287/4017/388/1848/9926/7171/4478/567/567/2182/11259/2887/221035/80381/1000/55742/8445/83892/650/10186/1316/23213/58527/390/9200/539…
SCHUETZ_BREAST_CANCER_DUCTAL_INVASIVE_UP	SCHUETZ_BREAST_CANCER_DUCTAL_INVASIVE_UP	351	0.485121	1.59111	1.51127e-05	0.00378602	0.00349977	4486	tags=18%, list=13%, signal=16%	3490/1359/301/4311/5328/1462/27306/5552/2124/5997/5698/5698/5698/5698/5698/5698/5698/5698/5698/5698/5698/5698/5698/5698/5698/5698/51338/5698/5698/5698/5698/5698/5698/5698/5698/5698/5698/5698/5698/5698/5698/5698/5698/29995/6591/1520/2119/2200/5698/5698/5698/5698/5698/5698/5698/5698/5480/5788/5788/231/23414/2078/5788/5788/8076/8477/7456/3915/10484/2669/9358/3428/2207/10154/5159/4017/64092/7048/9839…
WANG_SMARCE1_TARGETS_UP	WANG_SMARCE1_TARGETS_UP	286	0.502694	1.62637	1.67288e-05	0.00402971	0.00372503	4380	tags=24%, list=12%, signal=21%	3487/1462/28951/27018/8573/2034/9452/29995/10788/54947/57134/347902/148252/25925/51315/8076/26037/8609/389432/7436/10114/90843/2120/4026/3693/162394/7490/8835/51186/8204/389792/51449/1604/9096/256987/399665/2887/91624/7552/55742/79899/5918/91526/727910/727910/1829/23213/4313/84929/253430/4329/1540/51474/64065/8321/5873/115908/4345/26136/51661/659/83872/7042/90161/66000/283/168455/3437/2308/23446/…
MATSUDA_NATURAL_KILLER_DIFFERENTIATION	MATSUDA_NATURAL_KILLER_DIFFERENTIATION	479	0.447246	1.50312	1.83863e-05	0.00426493	0.00394248	5396	tags=24%, list=15%, signal=20%	3487/9402/54843/301/6659/3725/3514/147495/51338/26191/9516/65108/1525/7704/347733/4925/100885850/1769/10581/11328/4145/8519/113189/23258/7456/1236/9936/4069/23604/114609/2669/3400/1465/5325/79026/5217/8835/331/1992/100526664/259230/220323/7138/7743/27244/53346/860/56259/2857/26227/5795/196/1362/1102/6671/359845/359845/1829/7298/1316/256126/23095/30061/8323/9522/23300/9750/3073/6303/3459/6564/1379…
TONKS_TARGETS_OF_RUNX1_RUNX1T1_FUSION_HSC_UP	TONKS_TARGETS_OF_RUNX1_RUNX1T1_FUSION_HSC_UP	182	0.552531	1.7012	1.93724e-05	0.0043332	0.00400558	4341	tags=26%, list=12%, signal=23%	9173/6947/288/1462/6659/27306/120/28951/5997/9454/6711/4897/216/6003/347902/2078/9252/57787/84159/23586/3428/8835/64092/7048/1848/23475/1393/7345/9765/23657/11046/11046/55540/901/7764/5335/196/80723/4791/1316/26137/10203/5412/8496/4237/23365/9750/10602/1875/348/10957/5025/7041/4345/1390/10611/55711/3665/3665/760/23022/4739/1690/140290/10916/6594/1728/3131/780/780/780/780/780/780/780
RICKMAN_METASTASIS_UP	RICKMAN_METASTASIS_UP	339	0.47365	1.55161	2.20122e-05	0.00475387	0.00439444	7432	tags=47%, list=21%, signal=38%	4038/27018/8522/2119/51309/158880/196403/64110/80095/80127/4439/4439/4439/4439/4439/4439/4439/4439/2118/100505687/2842/90843/2669/9358/3693/117247/56898/22928/8975/92/202052/202052/51566/91151/100129361/100129361/100129361/100129361/100129361/100129361/7105/619208/100506084/100506084/100506084/4595/1911/79921/7552/3417/23066/10778/51704/8445/28986/81575/146198/2686/91/79096/348801/114928/4040/404…
HOSHIDA_LIVER_CANCER_SURVIVAL_UP	HOSHIDA_LIVER_CANCER_SURVIVAL_UP	73	0.679662	1.8358	2.42145e-05	0.00505518	0.00467297	3380	tags=39%, list=9%, signal=36%	1359/7852/301/120/5698/5698/5698/5698/5698/5698/5698/5698/5698/5698/5698/5698/5698/5698/5698/5698/5698/5698/5698/5698/5698/5698/5698/5698/5698/5698/5698/5698/5698/5698/5698/5698/2200/7204/5698/5698/5698/5698/5698/5698/5698/5698/54898/7456/4026/22858/2043/4017/11259/22856/4791/8826/10097/10437/6456/2877/596/6925/9170/7041/5698/5698/5698/5698/5698/5698/5698/5698/5698/5698/5698/5698/5698/5698/5698/5…
RIGGI_EWING_SARCOMA_PROGENITOR_UP	RIGGI_EWING_SARCOMA_PROGENITOR_UP	426	0.454677	1.51126	2.58826e-05	0.00519175	0.00479921	5356	tags=30%, list=15%, signal=26%	4885/22807/1836/58528/5733/4886/28951/5997/84456/8543/26191/8322/4897/9452/397/6770/5730/65108/5027/7704/3280/57489/9394/29126/8519/256714/55106/94274/389432/8635/9459/3400/5734/23704/54733/501/3815/112609/1179/51176/7490/65059/5295/54852/2043/8325/10911/54360/9635/57494/55351/7644/1848/2167/2820/684/56521/8605/719/7138/53346/7552/79899/3133/3133/3133/3133/3133/3133/3133/3133/3133/3133/3133/3133/…
TAKEDA_TARGETS_OF_NUP98_HOXA9_FUSION_3D_UP	TAKEDA_TARGETS_OF_NUP98_HOXA9_FUSION_3D_UP	177	0.545505	1.67781	2.65266e-05	0.00519175	0.00479921	5113	tags=35%, list=14%, signal=30%	3487/6947/6659/10321/5733/688/7180/216/94240/8519/2078/6326/9252/84159/284/23586/5139/23255/3428/11274/5874/23475/1393/473/684/55589/85441/200558/6773/6039/196/26137/23331/7294/219285/91351/83666/401097/6772/51032/24138/84875/10725/28965/23312/3665/3665/65979/9886/5610/4015/6296/54739/168455/3437/54809/7706/5321/9746/9746/51191/5789/5789/3433
HOLLMANN_APOPTOSIS_VIA_CD40_DN	HOLLMANN_APOPTOSIS_VIA_CD40_DN	260	0.503235	1.61272	2.9855e-05	0.00566612	0.00523772	3418	tags=31%, list=10%, signal=28%	5696/5696/5696/5696/5696/5696/5696/5696/10235/7852/5696/5696/5696/5696/5696/5696/5696/5696/7431/5698/5698/5698/5698/5698/5698/5698/5698/5698/5698/5698/5698/5698/5698/5698/5698/6711/7358/840/5698/5698/5698/5698/5698/5698/5698/5698/5698/5698/5698/5698/5698/5698/5698/5698/5696/5696/5696/5696/5696/5696/5696/5696/5698/5698/5698/5698/5698/5698/5698/5698/9516/29108/8519/23258/10384/537/9019/9647/9846/52…
REACTOME_KERATINIZATION	REACTOME_KERATINIZATION	217	-0.50278	-1.67377	3.60642e-05	0.00664323	0.00614095	4677	tags=4%, list=13%, signal=4%	643394/23254/9333/5317/440051/6701/1832/3856/11187/823/6705/3728/2125/5046/3880/3866/3860
REACTOME_RRNA_PROCESSING	REACTOME_RRNA_PROCESSING	199	-0.494898	-1.63702	4.53396e-05	0.00803842	0.00743066	8424	tags=52%, list=23%, signal=40%	1736/11102/6157/79707/130916/6203/6203/6203/6203/6203/6203/6203/6203/6203/6203/6132/25873/6169/6192/10799/4736/6173/9277/9277/9277/9277/9277/6143/6205/6155/6159/6156/6122/6227/115939/57418/6164/81875/134430/55178/51077/27042/6124/55127/3028/1453/23160/5394/26354/83732/51388/4691/6209/8780/9188/6175/28987/51065/51504/3921/6141/6176/51202/23404/10813/8602/6158/9045/6193/11224/10528/55813/6142/54512…
ACEVEDO_LIVER_CANCER_WITH_H3K9ME3_UP	ACEVEDO_LIVER_CANCER_WITH_H3K9ME3_UP	133	0.580181	1.7234	4.62052e-05	0.00803842	0.00743066	6497	tags=38%, list=18%, signal=31%	1192/1192/1192/1192/1192/1192/1192/4311/1462/401251/401251/401251/401251/401251/401251/3776/54491/93663/51101/4439/4439/4439/4439/4439/4439/4439/4439/54733/4291/83988/4056/4056/28986/11227/4286/3858/401251/401251/401251/401251/401251/401251/80031/932/932/51260/3660/66000/5986/23411/84547/79887/152404/84441/57683/57683/4439/4439/4439/4439/4439/4439/4439/4439/4439/4439/4439/4439/4439/4439/4439/4439…
HUANG_DASATINIB_SENSITIVITY_UP	HUANG_DASATINIB_SENSITIVITY_UP	80	0.660669	1.81735	4.95153e-05	0.00838147	0.00774777	3380	tags=46%, list=9%, signal=42%	5696/5696/5696/5696/5696/5696/5696/5696/301/5328/5696/5696/5696/5696/5696/5696/5696/5696/5698/5698/5698/5698/5698/5698/5698/5698/5698/5698/5698/5698/5698/5698/5698/5698/5698/5698/5698/5698/5698/5698/5698/5698/5698/5698/5698/5698/5698/5698/5698/5698/170954/170954/170954/170954/170954/170954/170954/170954/118429/6591/5696/5696/5696/5696/5696/5696/5696/5696/5698/5698/5698/5698/5698/5698/5698/5698/36…
GRAHAM_CML_QUIESCENT_VS_NORMAL_QUIESCENT_UP	GRAHAM_CML_QUIESCENT_VS_NORMAL_QUIESCENT_UP	92	-0.610337	-1.79159	5.78454e-05	0.00953383	0.00881301	1541	tags=26%, list=4%, signal=25%	7036/10661/3953/4000/84617/6708/9124/6320/10395/10395/948/3386/7168/9645/3674/1371/7001/28984/645/3557/3043/3045/360/3039/3047
TONKS_TARGETS_OF_RUNX1_RUNX1T1_FUSION_ERYTHROCYTE_UP	TONKS_TARGETS_OF_RUNX1_RUNX1T1_FUSION_ERYTHROCYTE_UP	156	0.559812	1.69581	6.55912e-05	0.0105333	0.00973689	4523	tags=29%, list=13%, signal=26%	6709/58528/10365/1462/6659/3725/4037/6414/9454/4897/1917/347902/2078/23258/23433/9060/3915/10769/10493/694/64778/3428/57761/8204/1848/23475/1393/7345/23657/719/7138/55540/7764/1362/5064/1316/91/27010/26010/3903/3903/3903/3903/3903/11213/6772/11326/2131/2209/10957/5025/4345/1390/1174/5595/1777/10916/1728/780/780/780/780/780/780/780/10457/10755/5467/4973/2526
MANNE_COVID19_COMBINED_COHORT_VS_HEALTHY_DONOR_PLATELETS_UP	MANNE_COVID19_COMBINED_COHORT_VS_HEALTHY_DONOR_PLATELETS_UP	176	-0.507364	-1.6492	7.4273e-05	0.0114192	0.0105559	4025	tags=23%, list=11%, signal=21%	55633/203054/203054/4728/1352/8818/149473/3159/92815/92815/91543/113791/871/63943/63943/63943/63943/55009/4061/4061/51237/114990/114990/790955/256281/339416/7106/269/3792/3792/1942/201164/402/63943/63943/63943/63943/63943/63943/63943/63943/10661/6723/125875/84182/26063/26063/92211/1004/128387/23541/3046/64838/2537/57674/3145/2995/147968/6535/90990/1154/51327/26262/51629/23175/6513/388588/80781/51…
PASQUALUCCI_LYMPHOMA_BY_GC_STAGE_DN	PASQUALUCCI_LYMPHOMA_BY_GC_STAGE_DN	170	0.543665	1.65249	7.47548e-05	0.0114192	0.0105559	6497	tags=57%, list=18%, signal=47%	1192/1192/1192/1192/1192/1192/1192/10235/10365/143686/28951/59339/79161/1266/397/4033/1769/3936/5790/1236/55843/7155/8303/694/283349/100529144/100529144/30011/1992/145226/79874/23406/5567/865/5140/930/1604/10645/23097/22843/7321/933/91526/64005/6856/6789/246175/64864/5579/92241/9750/64710/152137/3399/3399/23401/80774/951/390916/23369/1031/4739/9535/88455/9768/3899/2521/81611/586/6643/10472/8019/6…
ZHANG_BREAST_CANCER_PROGENITORS_UP	ZHANG_BREAST_CANCER_PROGENITORS_UP	429	0.439879	1.46364	8.93673e-05	0.0133264	0.0123188	8439	tags=38%, list=24%, signal=29%	58528/4311/29091/143686/7358/79047/284307/149076/256714/23043/9019/5991/93550/5217/58473/1287/54149/84216/51765/2824/4602/4718/8887/23047/51449/7267/55165/254251/121536/81539/196/84899/5888/1829/7570/699/83879/28981/4801/92906/84962/5885/97/151050/5019/596/858/23064/57547/4190/22852/672/64431/92092/84295/4591/7561/374879/7465/81611/3181/27247/84896/84896/84455/780/780/780/780/780/780/780/10776/12…
THUM_SYSTOLIC_HEART_FAILURE_UP	THUM_SYSTOLIC_HEART_FAILURE_UP	410	0.448722	1.48438	9.42415e-05	0.0137264	0.0126886	4470	tags=19%, list=12%, signal=17%	7852/23554/57507/1462/51313/27306/5552/4240/2124/3514/51338/56907/1266/5899/9672/397/1520/5788/5788/4033/4616/5788/5788/3936/192670/5868/4069/629/629/629/629/629/629/629/10769/2892/166968/3400/9358/71/100506144/2207/8835/2043/7048/2246/7345/719/396/678/307/901/7764/2857/406/1200/8814/10203/1356/3140/6856/8935/8496/10097/51170/813/11118/3903/3903/3903/3903/3903/1645/10602/10857/81688/55207/6772/11…
DACOSTA_UV_RESPONSE_VIA_ERCC3_COMMON_DN	DACOSTA_UV_RESPONSE_VIA_ERCC3_COMMON_DN	465	0.440202	1.47463	9.83008e-05	0.0139922	0.0129343	8000	tags=47%, list=22%, signal=37%	9397/3725/8573/90627/64764/7204/10512/23258/9693/8609/84159/23255/6733/8601/23424/8975/2043/56987/27067/10810/8204/9873/5567/2776/54520/2317/8476/1058/23075/23286/1386/9980/23543/23543/220594/11259/22856/4212/10801/10801/29994/29994/23180/5578/6249/64750/50618/1316/51678/10464/22882/5412/9456/4249/1859/6788/4088/5515/9874/23318/5373/10771/2131/4067/5980/5305/3796/6453/7326/90/9202/25820/23200/820…
BILD_MYC_ONCOGENIC_SIGNATURE	BILD_MYC_ONCOGENIC_SIGNATURE	202	-0.478585	-1.58564	0.000110412	0.0152803	0.014125	6341	tags=45%, list=18%, signal=37%	26354/23564/23564/23564/23564/23564/23564/23564/51619/4691/54663/56652/10244/374383/2193/55326/55326/10606/10813/861/8714/10528/152579/57530/617/5252/5252/5252/64285/29914/87178/54865/84916/84916/54540/3303/3303/3303/3303/3303/219/4839/4234/2067/6832/3303/3303/3303/3303/3303/23357/51154/6573/79711/79711/83719/10514/100288413/637/5036/22861/26030/10903/23564/23564/23564/23564/23564/23564/23564/235…
SATOH_COLORECTAL_CANCER_MYC_UP	SATOH_COLORECTAL_CANCER_MYC_UP	82	-0.615315	-1.76823	0.00011223	0.0152803	0.014125	3276	tags=33%, list=9%, signal=30%	9057/7298/25800/30834/30834/30834/30834/30834/30834/30834/30834/30834/30834/30834/30834/30834/30834/30834/30834/30834/30834/30834/30834/30834/30834/30834/30834/30834/30834/30834/30834/30834/30834/30834/30834/30834/30834/30834/30834/30834/30834/30834/30834/30834/30834/30834/30834/30834/30834/30834/30834
REACTOME_FC_EPSILON_RECEPTOR_FCERI_SIGNALING	REACTOME_FC_EPSILON_RECEPTOR_FCERI_SIGNALING	181	0.532187	1.63636	0.000118044	0.01573	0.0145407	3380	tags=35%, list=9%, signal=32%	2206/5696/5696/5696/5696/5696/5696/5696/5696/9402/10235/3725/5696/5696/5696/5696/5696/5696/5696/5696/5698/5698/5698/5698/5698/5698/5698/5698/5698/5698/5698/5698/5698/5698/5698/5698/5698/5698/5698/5698/5698/5698/5698/5698/5698/5698/5698/5698/5698/5698/5698/5698/4214/28797/5696/5696/5696/5696/5696/5696/5696/5696/5698/5698/5698/5698/5698/5698/5698/5698/10451/3709/9846/2207/5295/5290/5594/7321/5335/5…
BAELDE_DIABETIC_NEPHROPATHY_DN	BAELDE_DIABETIC_NEPHROPATHY_DN	429	0.435792	1.45004	0.000134467	0.0169678	0.0156849	3380	tags=35%, list=9%, signal=32%	3490/3248/301/4311/1462/120/28951/7431/2752/64764/5698/5698/5698/5698/5698/5698/5698/5698/5698/5698/5698/5698/5698/5698/5698/5698/5698/5698/5698/5698/5698/5698/5698/5698/5698/5698/5698/5698/5698/5698/5698/5698/10788/6890/6890/6890/6890/6890/6890/6890/6890/1378/5730/5698/5698/5698/5698/5698/5698/5698/5698/9516/1525/10512/1052/6890/6890/6890/6890/6890/6890/6890/6890/8519/7301/84159/51599/7155/6892/…
ACOSTA_PROLIFERATION_INDEPENDENT_MYC_TARGETS_DN	ACOSTA_PROLIFERATION_INDEPENDENT_MYC_TARGETS_DN	116	-0.564215	-1.74031	0.000134756	0.0169678	0.0156849	3208	tags=22%, list=9%, signal=21%	9751/871/4758/4758/4758/4758/4758/4758/4758/4758/8273/3937/793/3757/50488/3856/10826/2623/5292/823/57804/4668/22941/4778/4354/55652/4005/51092/4609/6320/3145/6397/54507/272/29125/3726/2994/2057/6006/3397/101/30851/2039/3043/9289/6007/8991/212/360
REACTOME_ANTIGEN_PRESENTATION_FOLDING_ASSEMBLY_AND_PEPTIDE_LOADING_OF_CLASS_I_MHC	REACTOME_ANTIGEN_PRESENTATION_FOLDING_ASSEMBLY_AND_PEPTIDE_LOADING_OF_CLASS_I_MHC	25	0.817492	1.84204	0.00013546	0.0169678	0.0156849	5742	tags=44%, list=16%, signal=38%	6890/6890/6890/6890/6890/6890/6890/6890/6890/6890/6890/6890/6890/6890/6890/6890/64167/10484/6892/6892/6892/6892/6892/6890/6890/6890/6890/6890/6890/6890/6890/3134/3134/3134/3134/3134/3134/3134/3107/3107/3107/3107/3107/3107/3107/6892/6892/6892/6892/6892/3107/3107/3107/3107/3107/3107/3107/567/567/6890/6890/6890/6890/6890/6890/6890/6890/6890/6890/6890/6890/6890/6890/6890/6890/3133/3133/3133/3133/3133…
HADDAD_B_LYMPHOCYTE_PROGENITOR	HADDAD_B_LYMPHOCYTE_PROGENITOR	273	0.47555	1.53065	0.000138909	0.0170585	0.0157688	8090	tags=41%, list=23%, signal=32%	7852/4311/3725/28951/10777/79161/80345/1948/23169/6843/4033/84159/7155/8303/694/10475/3134/3134/3134/3134/3134/3134/3134/6645/6645/6645/6645/51176/8835/79661/9214/23338/388/10912/2824/6328/2332/79684/23047/930/9765/51427/677/79982/5897/167227/8284/933/8445/65986/11120/7915/22882/8496/7730/7730/7163/51111/55608/81688/9205/1875/55805/6925/9451/3621/5533/221037/3660/3399/3399/5896/79573/8621/4208/10…
CASORELLI_ACUTE_PROMYELOCYTIC_LEUKEMIA_UP	CASORELLI_ACUTE_PROMYELOCYTIC_LEUKEMIA_UP	167	0.528052	1.60141	0.000146515	0.0176466	0.0163124	3463	tags=30%, list=10%, signal=27%	3490/8900/10365/3725/5997/3514/79161/8905/5730/8509/8509/2322/6843/1052/23258/26037/694/214/64778/10253/5325/1287/9214/9445/7644/3034/1318/5140/8509/8509/4065/5578/64750/4540/22848/1316/2354/9902/10618/90634/2334/23166/50515/171586/54477/11145/2672/9262/11010/1521/4494/23312
CREIGHTON_ENDOCRINE_THERAPY_RESISTANCE_5	CREIGHTON_ENDOCRINE_THERAPY_RESISTANCE_5	478	0.429049	1.44257	0.000150061	0.0177327	0.016392	6497	tags=37%, list=18%, signal=31%	1192/1192/1192/1192/1192/1192/1192/22807/288/10321/51313/55552/463/2034/8322/7358/6674/23303/56907/1948/6484/7188/9516/4925/57045/139818/51101/3628/64781/8609/84159/10769/116496/214/161742/143888/22837/10396/1622/8895/57761/58489/3306/23328/4151/9306/55335/10487/138151/57713/58472/5874/130814/129049/23593/23075/113263/1604/9980/7844/58480/58480/57700/2887/10819/5795/196/8495/8445/23180/64762/2315…
REACTOME_METABOLISM_OF_ANGIOTENSINOGEN_TO_ANGIOTENSINS	REACTOME_METABOLISM_OF_ANGIOTENSINOGEN_TO_ANGIOTENSINS	18	0.865318	1.82649	0.000163322	0.0189423	0.0175102	47	tags=10%, list=0%, signal=10%	1359/4311
GRAHAM_NORMAL_QUIESCENT_VS_NORMAL_DIVIDING_UP	GRAHAM_NORMAL_QUIESCENT_VS_NORMAL_DIVIDING_UP	60	0.660711	1.74505	0.000169479	0.019299	0.0178399	3646	tags=29%, list=10%, signal=26%	374/8942/6711/216/5788/5788/5788/5788/8809/116496/8204/1393/8496/8743/7041/11010/1390/10725/6840
SENESE_HDAC3_TARGETS_UP	SENESE_HDAC3_TARGETS_UP	481	0.431195	1.45004	0.000172647	0.0193087	0.0178489	4981	tags=23%, list=14%, signal=20%	6947/5328/8942/51313/64399/8573/6563/6711/118429/10788/56907/7204/1525/80705/23043/112616/2760/79668/694/5991/166968/2669/161742/3428/10741/4323/51320/162394/25832/80824/80824/2296/4646/8325/90874/7048/388/5567/865/55704/64393/2581/23657/396/4090/1604/5337/79982/7128/307/2887/8450/57157/167227/51700/64430/650/1200/330/4791/4540/8826/1316/26137/339122/9522/4763/8496/6789/10097/253461/1021/5530/211…
GRAESSMANN_APOPTOSIS_BY_SERUM_DEPRIVATION_DN	GRAESSMANN_APOPTOSIS_BY_SERUM_DEPRIVATION_DN	232	-0.458793	-1.53832	0.000186148	0.0202986	0.0187639	4777	tags=31%, list=13%, signal=27%	1395/2624/20/51234/221178/221178/221178/23014/3770/3257/2323/3932/54566/9862/3373/8566/25994/80303/5317/7133/10131/79180/2027/140809/5054/3960/3960/221178/221178/221178/3757/84270/2729/9696/140685/114880/6793/26355/10938/64798/123096/1365/55007/29923/8928/5118/7422/80148/3714/9260/5163/3816/8497/4846/9911/1264/7052/3669/55502/9091/2026/2819/726/23175/6513/2812/27090/65009/5413/3162/664/4118/14057…
IWANAGA_CARCINOGENESIS_BY_KRAS_PTEN_DN	IWANAGA_CARCINOGENESIS_BY_KRAS_PTEN_DN	352	0.450239	1.47684	0.00018798	0.0202986	0.0187639	5495	tags=24%, list=15%, signal=21%	10235/10321/3725/5997/93663/6711/51338/8322/216/83595/83595/5269/1948/5788/5788/5788/5788/94274/3709/8609/9659/5954/387509/389813/58489/124773/6645/6645/6645/6645/54852/8193/619208/2820/4905/4905/4905/8887/23593/83988/2021/22856/4212/90488/167227/5335/84239/79858/57720/51742/6249/863/1316/4313/23331/10203/1859/23053/26010/90135/144402/5019/137964/858/7414/23111/353088/55061/7041/23252/4134/54952/…
REACTOME_NEUTROPHIL_DEGRANULATION	REACTOME_NEUTROPHIL_DEGRANULATION	476	0.429068	1.44276	0.000203169	0.0214932	0.0198682	4944	tags=25%, list=14%, signal=22%	8288/6947/6709/4311/5328/10321/1535/2950/10788/5269/1378/1520/11031/54918/29108/5788/5788/3920/4033/326624/5788/5788/2760/8635/4069/1/10493/5836/79888/79888/10396/8895/79895/5912/2207/2717/10487/3107/3107/3107/3107/3107/3107/3107/1992/3683/23406/967/966/4718/684/127829/23593/566/566/138050/719/1604/9545/196527/5337/3107/3107/3107/3107/3107/3107/3107/567/567/8514/10555/5594/3417/4257/5795/8560/100…
LINDGREN_BLADDER_CANCER_CLUSTER_2A_DN	LINDGREN_BLADDER_CANCER_CLUSTER_2A_DN	140	0.550819	1.64438	0.000206831	0.0214932	0.0198682	4404	tags=39%, list=12%, signal=35%	6414/51338/9452/10788/1266/8905/8519/7325/9936/4069/214/134265/5325/1808/6812/10783/57494/388/2776/130814/138639/1318/719/2182/55589/4856/23071/2790/10618/84707/91283/57589/148203/4496/23064/3796/152137/2941/11010/4501/51552/26136/23022/10193/84460/217/4783/1827/5588/54431/6386/7763/285550/25852/6651
FULCHER_INFLAMMATORY_RESPONSE_LECTIN_VS_LPS_DN	FULCHER_INFLAMMATORY_RESPONSE_LECTIN_VS_LPS_DN	440	0.443735	1.481	0.000210696	0.0214932	0.0198682	4394	tags=18%, list=12%, signal=16%	10365/120/6414/6690/59339/688/115273/51338/8522/216/56907/81563/51309/94240/1052/139818/10581/8519/4616/29967/84159/23527/23586/9936/8635/55672/629/629/629/629/629/629/629/9846/10475/57600/5734/5641/23228/23228/123803/123803/79888/79888/3428/55603/5912/22928/162394/25832/11274/7048/8204/5567/8832/51765/9839/2332/719/10791/23181/22902/4155/678/10087/100129792/284443/9747/23151/65018/1316/64207/223…
SENGUPTA_NASOPHARYNGEAL_CARCINOMA_WITH_LMP1_UP	SENGUPTA_NASOPHARYNGEAL_CARCINOMA_WITH_LMP1_UP	389	0.438847	1.44733	0.00021277	0.0214932	0.0198682	7534	tags=24%, list=21%, signal=20%	8942/10321/143686/6690/23683/93663/688/8544/4008/57045/29126/29967/8792/214/64778/3815/1080/25832/11274/2043/4646/55784/283464/26060/9926/64393/2167/8476/23657/7267/79982/55589/91624/1131/11179/285172/8445/8989/65986/8826/23213/51809/1356/7570/9522/50808/79772/8615/55179/219285/5966/100/4232/5570/9877/317761/11213/283742/10767/596/1780/6925/57396/152137/8654/27303/8618/151613/9510/2589/55711/2212…
REACTOME_ROLE_OF_LAT2_NTAL_LAB_ON_CALCIUM_MOBILIZATION	REACTOME_ROLE_OF_LAT2_NTAL_LAB_ON_CALCIUM_MOBILIZATION	67	0.663643	1.77033	0.000222152	0.0218439	0.0201923	1390	tags=9%, list=4%, signal=9%	2206/28797/9846/2207/5295/5290
WUNDER_INFLAMMATORY_RESPONSE_AND_CHOLESTEROL_UP	WUNDER_INFLAMMATORY_RESPONSE_AND_CHOLESTEROL_UP	65	0.649249	1.72297	0.000226554	0.0218439	0.0201923	4470	tags=24%, list=12%, signal=21%	5696/5696/5696/5696/5696/5696/5696/5696/5696/5696/5696/5696/5696/5696/5696/5696/5698/5698/5698/5698/5698/5698/5698/5698/5698/5698/5698/5698/5698/5698/5698/5698/840/5698/5698/5698/5698/5698/5698/5698/5698/5698/5698/5698/5698/5698/5698/5698/5698/5696/5696/5696/5696/5696/5696/5696/5696/1520/5698/5698/5698/5698/5698/5698/5698/5698/7318/100526664/684/567/567/2710/3133/3133/3133/3133/3133/3133/3133/313…
GRYDER_PAX3FOXO1_ENHANCERS_KO_DOWN	GRYDER_PAX3FOXO1_ENHANCERS_KO_DOWN	438	0.432669	1.44309	0.000230267	0.0218439	0.0201923	5368	tags=25%, list=15%, signal=21%	222223/8573/23102/7431/8543/6450/57134/9672/2119/57460/81846/23433/51315/26037/158471/7325/50859/5954/71/1465/58492/79895/117247/55619/55690/57190/5217/10487/65059/57713/81553/23619/4017/145773/57494/26060/259230/1848/729920/64342/63939/8828/7128/81566/57700/143/9844/22856/4212/7764/81539/166/5335/8445/29954/57720/4780/58527/3799/4001/3566/6382/4232/375061/28981/143458/9218/6774/26010/5599/3707/5…
SMID_BREAST_CANCER_NORMAL_LIKE_UP	SMID_BREAST_CANCER_NORMAL_LIKE_UP	474	0.430017	1.44401	0.00023128	0.0218439	0.0201923	3503	tags=11%, list=10%, signal=10%	10235/4311/81618/120/5552/2124/7102/6414/3514/26191/9452/216/5730/6843/5788/5788/4033/4145/5788/5788/7456/10384/8809/5790/9840/1236/55843/9936/4069/1380/50619/10865/51291/2669/3400/5125/5734/23228/23228/3679/10253/3428/3815/55619/752/51176/5295/81553/2043/9214/54360/3683/958/10319/608/23406/55704/2167/930/393/10791/11117/4155/79649/10157/9844/6039/933/4065/51411/330/10186/7011/26137/8935/11262/51…
REACTOME_SCAVENGING_OF_HEME_FROM_PLASMA	REACTOME_SCAVENGING_OF_HEME_FROM_PLASMA	65	-0.642776	-1.79351	0.000236975	0.0218439	0.0201923	2070	tags=9%, list=6%, signal=9%	8542/9332/4035/3043/3039/3040
GAZDA_DIAMOND_BLACKFAN_ANEMIA_PROGENITOR_DN	GAZDA_DIAMOND_BLACKFAN_ANEMIA_PROGENITOR_DN	64	0.655809	1.73858	0.000238163	0.0218439	0.0201923	6845	tags=48%, list=19%, signal=39%	3490/2322/4925/3920/3709/5325/8887/1000/11013/26227/4801/5827/10434/118987/2653/7637/6683/1047/23279/5789/5789/9337/54480/55812/23137/80145/80173/84061/60509/7543/25998/25998
SENGUPTA_NASOPHARYNGEAL_CARCINOMA_UP	SENGUPTA_NASOPHARYNGEAL_CARCINOMA_UP	299	0.467998	1.52347	0.000240656	0.0218439	0.0201923	8372	tags=38%, list=23%, signal=29%	135398/5328/1462/6659/8573/1948/6770/2200/57045/29126/84327/9060/3915/5954/51768/10741/8835/1808/135293/53616/684/92344/55165/55612/23543/23543/3417/7298/23213/23333/83879/23306/83990/4801/92906/121457/6772/84034/25800/341/2209/4345/80055/56983/157567/84930/2744/10308/54739/9768/9655/55835/22823/1075/3181/9662/23446/7690/50810/7637/56605/2697/128/3832/7153/7072/54799/79892/1111/168374/51105/1871/…
BIOCARTA_AHSP_PATHWAY	BIOCARTA_AHSP_PATHWAY	13	-0.901227	-1.82376	0.000245295	0.0219469	0.0202876	2011	tags=92%, list=6%, signal=87%	210/2623/7390/2235/3145/7389/51327/1371/3043/212/3039/3040
RODWELL_AGING_KIDNEY_UP	RODWELL_AGING_KIDNEY_UP	486	0.42461	1.42924	0.000251615	0.0220346	0.0203686	4470	tags=22%, list=12%, signal=20%	5696/5696/5696/5696/5696/5696/5696/5696/87/1192/1192/1192/1192/1192/1192/1192/412/54843/7852/1462/81618/51313/5696/5696/5696/5696/5696/5696/5696/5696/5552/4240/23102/7431/3514/123920/5698/5698/5698/5698/5698/5698/5698/5698/5698/5698/5698/5698/5698/5698/5698/5698/79161/26191/5698/5698/5698/5698/5698/5698/5698/5698/5698/5698/5698/5698/5698/5698/5698/5698/170954/170954/170954/170954/170954/170954/17…
LEONARD_HYPOXIA	LEONARD_HYPOXIA	41	-0.700933	-1.80089	0.000253311	0.0220346	0.0203686	4711	tags=48%, list=13%, signal=41%	5214/5230/205/8819/23210/1028/1028/5054/1942/8553/226/2355/8140/7422/4582/5210/3726/9123/6513/664
BLALOCK_ALZHEIMERS_DISEASE_INCIPIENT_UP	BLALOCK_ALZHEIMERS_DISEASE_INCIPIENT_UP	385	0.44335	1.45838	0.000270599	0.0232159	0.0214606	6563	tags=28%, list=18%, signal=23%	1192/1192/1192/1192/1192/1192/1192/1050/10365/1462/120/6563/6674/1378/1520/9653/2200/23433/3915/2593/284/8099/202/8635/1435/23604/10475/3400/3588/51768/3679/6733/4640/55603/8895/54733/9534/3340/51176/3652/4828/23406/8556/59348/23181/4155/678/26523/26226/860/56242/57720/65986/3727/10464/3140/2261/26284/25796/57187/7163/5926/6257/6257/6257/6257/6257/6257/341/9205/23765/64710/1191/56474/7525/8202/31…
KINSEY_TARGETS_OF_EWSR1_FLII_FUSION_DN	KINSEY_TARGETS_OF_EWSR1_FLII_FUSION_DN	325	0.460347	1.50865	0.000275043	0.0232783	0.0215183	5306	tags=41%, list=15%, signal=35%	3490/6709/5328/10365/6659/81618/7114/7431/6414/216/4008/2200/3280/347902/11328/9060/8609/3915/84159/7791/7791/284/9500/9846/694/10475/79586/2669/64778/23576/26115/55603/162394/84557/2296/7048/388/966/129303/389792/2317/4012/11046/11046/131544/22921/6773/55742/3133/3133/3133/3133/3133/3133/3133/3133/3133/3133/3133/3133/3133/3133/3133/3133/3133/3133/3133/3133/3133/3133/3133/3133/3133/3133/3133/3133…
WALLACE_PROSTATE_CANCER_RACE_UP	WALLACE_PROSTATE_CANCER_RACE_UP	295	0.463592	1.50638	0.000283692	0.0236902	0.021899	3399	tags=23%, list=9%, signal=22%	5696/5696/5696/5696/5696/5696/5696/5696/7852/5696/5696/5696/5696/5696/5696/5696/5696/5552/2124/3514/5698/5698/5698/5698/5698/5698/5698/5698/5698/5698/5698/5698/5698/5698/5698/5698/51338/26191/5698/5698/5698/5698/5698/5698/5698/5698/5698/5698/5698/5698/5698/5698/5698/5698/6890/6890/6890/6890/6890/6890/6890/6890/5696/5696/5696/5696/5696/5696/5696/5696/1520/5730/2200/9308/5341/5698/5698/5698/5698/56…
HUANG_GATA2_TARGETS_DN	HUANG_GATA2_TARGETS_DN	73	-0.61974	-1.77544	0.000295247	0.0236981	0.0219064	4764	tags=38%, list=13%, signal=33%	2624/1503/2224/23210/81567/6472/5198/440/64768/7037/51604/10509/27250/10661/3099/115708/5087/9411/1870/1870/4005/10534/25902/6536/6513/1958/2812/161882/2532
MORI_LARGE_PRE_BII_LYMPHOCYTE_DN	MORI_LARGE_PRE_BII_LYMPHOCYTE_DN	57	0.685532	1.80075	0.000297544	0.0236981	0.0219064	5069	tags=20%, list=14%, signal=17%	10507/1520/9308/5788/5788/5788/5788/8477/7456/3936/202/694/51291/23499/4026/6646/1992/7318/933/330/3566/5863/5863/5863/5863/5863/9750/822/1794/5305/3108/3108/3108/3108/3108/3108/3108/3108/217/3108/3108/3108/3108/3108/3108/3108/3108/3108/3108/3108/3108/3108/3108/3108/3108/3108/3108/3108/3108/3108/3108/3108/3108/3108/3108/3108/3108/3108/3108/3108/3108/3108/3108/3108/3108/3108/3108/3108/3108/5863/58…
MANALO_HYPOXIA_DN	MANALO_HYPOXIA_DN	289	-0.43433	-1.49027	0.000297894	0.0236981	0.0219064	7151	tags=44%, list=20%, signal=35%	7407/7407/7407/7407/7407/7407/7407/7407/7407/7407/7407/7407/7407/7407/79081/10329/10007/4171/8886/23560/6787/4522/23171/55127/3954/10105/81929/79902/4150/378708/1717/5902/9933/80324/55798/54663/51728/10248/54496/9188/4891/23404/10813/7372/10528/1965/83743/79833/81570/1503/617/3376/23511/29914/55226/9875/23212/1370/51367/9927/26278/55720/93436/898/26589/580/10302/56926/8165/55355/3159/10061/6183/6…
HADDAD_T_LYMPHOCYTE_AND_NK_PROGENITOR_DN	HADDAD_T_LYMPHOCYTE_AND_NK_PROGENITOR_DN	63	0.654662	1.73791	0.000302205	0.0236981	0.0219064	2851	tags=11%, list=8%, signal=10%	4885/4311/1462/28951/5341/11031/1052/1236/4069/5641/51176/3034/6328/566/566/9256/2182/6039/9379/932/932
REACTOME_FCERI_MEDIATED_CA_2_MOBILIZATION	REACTOME_FCERI_MEDIATED_CA_2_MOBILIZATION	82	0.618005	1.71292	0.000305066	0.0236981	0.0219064	2821	tags=12%, list=8%, signal=11%	2206/9402/28797/10451/3709/2207/5335/7294/5530/4067
MIKKELSEN_ES_HCP_WITH_H3K27ME3	MIKKELSEN_ES_HCP_WITH_H3K27ME3	41	-0.696568	-1.78967	0.00030649	0.0236981	0.0219064	1609	tags=15%, list=4%, signal=14%	83401/57717/6886/242/1630/3050
KEGG_ASTHMA	KEGG_ASTHMA	30	0.783331	1.84441	0.000321518	0.0245569	0.0227002	5191	tags=8%, list=14%, signal=7%	2206/8288/3567/2207/958/5553/3108/3108/3108/3108/3108/3108/3108/3108/3108/3108/3108/3108/3108/3108/3108/3108/3108/3108/3108/3108/3108/3108/3108/3108/3108/3108/3108/3108/3108/3108/3108/3108/3108/3108/3108/3108/3108/3108/3108/3108/3108/3108/3108/3108/3108/3108/3108/3108/3111/3111/3111/3111/3111/3111/3111/3111/3111/3111/3111/3111/3111/3111
LEE_EARLY_T_LYMPHOCYTE_DN	LEE_EARLY_T_LYMPHOCYTE_DN	56	0.67977	1.77911	0.000358455	0.0269206	0.0248852	5304	tags=43%, list=15%, signal=37%	87/288/10365/4214/57134/347902/10581/8519/1236/8635/3134/3134/3134/3134/3134/3134/3134/129293/23406/5795/3133/3133/3133/3133/3133/3133/3133/3133/3133/3133/3133/3133/3133/3133/3133/3133/3133/3133/3133/3133/3133/3133/3133/3133/3133/3133/3133/3133/79814/3566/1540/3105/3105/3105/3105/3105/3105/3105/3105/79961/4753/8743/3106/3106/3106/3106/3106/3106/2308/1901/3105/3105/3105/3105/3105/3105/3105/3105/31…
ACEVEDO_LIVER_CANCER_WITH_H3K27ME3_UP	ACEVEDO_LIVER_CANCER_WITH_H3K27ME3_UP	285	0.470094	1.52212	0.000361062	0.0269206	0.0248852	5865	tags=20%, list=16%, signal=17%	374/9173/135398/10321/3776/150350/79161/7180/56907/397/10512/158880/23043/9500/161742/26115/54733/1179/8325/253827/51765/83988/1131/6005/11013/6039/23213/28986/9456/5728/5728/202309/90550/8321/23708/80031/57547/9990/286187/91746/91746/23022/1360/5066/221711/5588/4093/55693/79887/170627/23418/220963/282890/282890/282890/282890/282890/282890/282890/282890/282890/282890/282890/282890/282890/282890/2…
FRASOR_RESPONSE_TO_ESTRADIOL_UP	FRASOR_RESPONSE_TO_ESTRADIOL_UP	35	0.740014	1.80342	0.000365717	0.0269469	0.0249095	1432	tags=16%, list=4%, signal=16%	374/3487/5733/11031/8204/23286
TAKEDA_TARGETS_OF_NUP98_HOXA9_FUSION_8D_DN	TAKEDA_TARGETS_OF_NUP98_HOXA9_FUSION_8D_DN	195	0.496058	1.54013	0.000385532	0.0280766	0.0259538	1941	tags=7%, list=5%, signal=7%	2206/10365/51313/3725/2752/2034/93663/9452/1378/3568/9693/116496/5836/5125/131540/5641/4323/65059/90693/10911/57189/57189/57189/57189/54360/11309/53346/2857/10092
NAKAJIMA_MAST_CELL	NAKAJIMA_MAST_CELL	45	0.708471	1.79102	0.000430254	0.0309734	0.0286316	3460	tags=46%, list=10%, signal=41%	2206/3248/946/4013/27306/28951/7177/10493/3815/211/3067/4056/4056/3958/5553/822/284119/4496/1191/4504/4494/672
WP_GLYCOLYSIS_AND_GLUCONEOGENESIS	WP_GLYCOLYSIS_AND_GLUCONEOGENESIS	45	-0.68331	-1.80183	0.000435492	0.0309941	0.0286508	4814	tags=51%, list=13%, signal=44%	5211/5214/5230/6514/4191/2821/2821/7167/5315/2027/3939/3939/3098/5313/5313/5313/5313/5213/5105/3099/226/6517/6517/230/2026/6513
CREIGHTON_ENDOCRINE_THERAPY_RESISTANCE_2	CREIGHTON_ENDOCRINE_THERAPY_RESISTANCE_2	439	0.424786	1.41744	0.000469468	0.0330368	0.030539	5674	tags=33%, list=16%, signal=28%	4885/26191/79819/376267/57489/80705/80095/7301/80127/51390/219736/730101/54839/9600/5991/7568/83450/493911/10745/93550/5217/55335/8975/138151/53340/619208/9873/4291/1132/2824/145508/85315/222235/9498/285755/1318/566/566/51364/90835/127003/80258/11127/149465/678/11020/4241/441054/2021/80728/56171/22843/10778/161394/4117/10585/79858/57720/84747/5721/5721/286207/51265/81575/4610/7187/23116/90506/652…
REACTOME_RAC1_GTPASE_CYCLE	REACTOME_RAC1_GTPASE_CYCLE	182	0.507163	1.56152	0.000495815	0.0341349	0.0315541	6542	tags=39%, list=18%, signal=32%	4168/1535/10788/397/7204/10451/139818/347902/7456/55843/9826/9459/50619/51291/55619/752/64857/10928/5295/29/29/29/10810/143872/23348/8476/5290/23075/613/393/396/6655/5337/80728/115703/10787/8826/10160/117289/5062/4650/1794/10811/80005/23344/94134/9815/4689/4689/57584/10144/57679/653361/128239/57572/8936/23380/57580/23592/8997/55971/3895/51347/10006/128272/10672/2909/81624/124056/998/5338/79658/11…
WELCSH_BRCA1_TARGETS_UP	WELCSH_BRCA1_TARGETS_UP	197	0.494865	1.53594	0.000495972	0.0341349	0.0315541	5002	tags=26%, list=14%, signal=23%	301/120/4240/6414/1535/4277/4277/4277/4277/4277/4277/4277/4277/1525/5480/10484/214/3400/501/22928/1992/567/567/307/901/7552/3417/8826/2254/3799/9522/9338/10857/6772/9324/3796/6883/2135/6391/8540/4208/22920/3074/8209/11014/4758/4758/4758/4758/4758/4758/4758/4758/4758/4758/4758/4758/4758/4758/4758/4758/10627/10308/382/5066/4758/4758/4758/4758/4758/4758/4758/4758/4758/4758/4758/4758/4758/4758/4758/4…
KIM_WT1_TARGETS_DN	KIM_WT1_TARGETS_DN	464	0.419361	1.40511	0.000557515	0.0379534	0.0350839	6229	tags=28%, list=17%, signal=23%	1836/9397/8543/54958/5987/5987/5987/5987/5987/5987/5987/51309/3280/10512/4616/9693/80162/23527/9659/4439/4439/4439/4439/4439/4439/4439/4439/10769/9358/3428/5912/5325/6645/6645/6645/6645/6646/1808/79366/7738/259230/8556/5987/5987/5987/5987/5987/5987/5987/1058/54407/55165/1386/54665/901/5987/5987/5987/5987/5987/5987/5987/64430/29994/29994/9747/64750/26137/699/8934/6782/10097/8491/64065/5723/51170/5…
LEE_LIVER_CANCER_E2F1_UP	LEE_LIVER_CANCER_E2F1_UP	63	0.638621	1.69533	0.000575215	0.0387373	0.0358085	1787	tags=22%, list=5%, signal=21%	6709/301/4240/6690/1520/1525/4925/91373/71/837/11274/388/967/2167/2328
SCHAEFFER_PROSTATE_DEVELOPMENT_48HR_DN	SCHAEFFER_PROSTATE_DEVELOPMENT_48HR_DN	403	0.427175	1.41122	0.000585596	0.0390169	0.0360669	3634	tags=21%, list=10%, signal=19%	3487/29091/5733/6263/23683/6563/79819/83595/83595/6484/9308/25925/8609/84159/51439/389432/4069/9659/50619/3400/5641/91694/91694/55603/200132/10741/1272/5159/81553/30011/51566/23221/55349/7048/143872/2824/4602/684/8828/11309/6092/677/4090/1604/55353/10645/387640/55589/11259/51635/22921/23429/23429/79899/196/59350/3727/171019/23213/8814/64207/390/22881/79575/83879/6788/375387/5579/4237/85458/619279…
MASSARWEH_TAMOXIFEN_RESISTANCE_DN	MASSARWEH_TAMOXIFEN_RESISTANCE_DN	240	0.477217	1.51645	0.000609882	0.0397226	0.0367193	2801	tags=19%, list=8%, signal=18%	374/3487/6947/1836/3248/8900/6659/4886/120/90627/4897/8905/6450/84187/11031/29108/347733/347902/3920/7903/54898/80339/55672/23576/10761/2717/7786/5295/1287/9214/8204/4602/2317/7138/143/55540/161394/65986/171019/223082/4001/22882/26033/5570/10265/8321/25800/596/56474
DAVIES_MULTIPLE_MYELOMA_VS_MGUS_DN	DAVIES_MULTIPLE_MYELOMA_VS_MGUS_DN	25	0.789713	1.77945	0.000617247	0.0397226	0.0367193	3784	tags=42%, list=11%, signal=38%	87/7114/2752/9516/2207/10487/6039/6303/7414/3927/1796
LINDGREN_BLADDER_CANCER_CLUSTER_2B	LINDGREN_BLADDER_CANCER_CLUSTER_2B	385	0.434491	1.42924	0.000621063	0.0397226	0.0367193	5387	tags=25%, list=15%, signal=22%	3490/7852/29091/3725/5552/2124/5997/51338/170954/170954/170954/170954/170954/170954/170954/170954/9452/29995/10788/1266/8905/5899/9672/27128/375057/10581/8519/4616/64781/3936/55843/9936/4069/2669/1465/51176/8835/1808/399/5159/3157/10783/30011/3683/64092/23406/2824/25927/4478/8828/719/55783/7128/55589/860/11259/22856/57157/6039/3133/3133/3133/3133/3133/3133/3133/3133/3133/3133/3133/3133/3133/3133/…
BUFFA_HYPOXIA_METAGENE	BUFFA_HYPOXIA_METAGENE	50	-0.659967	-1.77068	0.000621557	0.0397226	0.0367193	5101	tags=44%, list=14%, signal=37%	81034/5214/5230/54443/205/51142/11332/51373/2821/2821/7167/3939/3939/84790/4860/3099/84617/29923/353322/7422/7846/6513/664/10397
ZHENG_FOXP3_TARGETS_IN_THYMUS_UP	ZHENG_FOXP3_TARGETS_IN_THYMUS_UP	195	0.488598	1.51697	0.000659361	0.0417129	0.0385591	6896	tags=41%, list=19%, signal=33%	7852/120/84456/4214/23233/7204/23258/84159/9840/51439/55843/7155/5991/80317/55619/8835/5295/54149/259230/8832/113263/7128/27244/678/23097/221035/57157/7764/1997/1316/26137/246175/51762/10905/157769/10767/2131/23548/5305/64332/54941/5533/221037/8202/122830/79624/80055/6938/1017/6386/4217/523/51542/55486/490/80205/84280/55500/222484/7813/63915/26959/26959/55791/26018/11231/79699/53840/10370/5128/98…
LU_AGING_BRAIN_UP	LU_AGING_BRAIN_UP	262	0.462921	1.4835	0.000683138	0.0427849	0.0395501	4561	tags=31%, list=13%, signal=27%	1462/4038/8611/120/7431/6414/64764/6563/9452/5364/9516/1052/3920/54898/10974/9936/9659/10493/9846/3400/1465/3428/4026/8601/8895/3306/7957/79026/10154/1287/22978/7048/5286/9839/2246/4478/23593/7138/256987/6261/7423/22856/55742/29994/29994/51704/9747/347/8826/26137/4780/2262/2670/22882/6856/2261/5934/6788/3240/3707/9848/596/858/5305/7525/9788/4495/10611/5175/5908/3665/3665/23022/51100/5189/10627/65…
REACTOME_METABOLISM_OF_PORPHYRINS	REACTOME_METABOLISM_OF_PORPHYRINS	27	-0.746188	-1.77556	0.000718982	0.044584	0.0412132	2288	tags=38%, list=6%, signal=36%	9429/210/7390/5498/2235/3145/7389/1371/645/3162/212
VECCHI_GASTRIC_CANCER_EARLY_DN	VECCHI_GASTRIC_CANCER_EARLY_DN	368	0.431671	1.41912	0.000727516	0.0446709	0.0412935	5805	tags=22%, list=16%, signal=19%	3248/5733/64399/2124/2752/9118/6414/23683/9452/216/6003/79746/7704/51309/158880/256714/7903/4616/8076/284/9936/7436/3400/3815/1272/79366/608/5567/285671/2824/2167/1131/28966/84239/23157/28986/5412/79772/84707/4329/6456/100/5570/1645/5873/23708/6564/4496/79884/120103/1191/23111/55061/27303/10690/4501/4494/51465/79625/6571/221294/79674/2104/55328/6822/4225/3908/2651/2651/6594/3899/3131/50810/56605/…
PEDRIOLI_MIR31_TARGETS_DN	PEDRIOLI_MIR31_TARGETS_DN	405	0.428974	1.41645	0.000752502	0.0457565	0.042297	5191	tags=19%, list=14%, signal=17%	8611/7114/54491/7102/688/123920/79161/4897/5730/9516/5027/375057/81846/94274/10493/50619/23604/134265/27132/84163/169981/8601/122970/414/5971/752/9306/253832/10487/58473/4301/7048/391267/8556/8605/9256/23657/286046/1604/22902/196527/7128/58480/58480/9525/134285/51635/57343/80381/388677/387628/23066/330/4791/1829/1316/22982/7730/7730/219285/90634/23365/92241/2643/1645/84034/1191/414328/64332/51316…
WIERENGA_STAT5A_TARGETS_GROUP1	WIERENGA_STAT5A_TARGETS_GROUP1	125	-0.524026	-1.62801	0.00076025	0.0457831	0.0423216	2072	tags=25%, list=6%, signal=24%	28960/1028/1028/291/83483/113791/5631/114990/114990/5169/64744/794/794/148523/5292/84626/7090/57664/10500/25893/92211/1512/3075/3075/29923/23413/6640/3310/161176/7052/5909/1847/64598/4582/1154/4130/6676/10422/5210/6536/2994/221002/55558/23762/51312/53947/10397/3050
KEGG_RENIN_ANGIOTENSIN_SYSTEM	KEGG_RENIN_ANGIOTENSIN_SYSTEM	17	0.874813	1.8338	0.000773355	0.0461288	0.0426411	1453	tags=18%, list=4%, signal=17%	1359/4311/4012
WINTER_HYPOXIA_METAGENE	WINTER_HYPOXIA_METAGENE	240	-0.441248	-1.4835	0.000819837	0.0481928	0.0445491	3274	tags=21%, list=9%, signal=19%	2745/2821/2821/4351/4267/7167/671/5315/2027/3939/3939/2353/5054/5715/7040/54206/7037/3098/3664/4860/1942/2022/4953/11040/10628/5292/3678/2335/28968/9361/7057/3099/8553/6533/5768/302/3164/9136/29923/226/7422/10534/4601/5742/51129/415/4846/230/7052/6535/3956/4035/4582/5210/3880/6513/1958/3576/3162/664/10397/3429/3429
RUIZ_TNC_TARGETS_UP	RUIZ_TNC_TARGETS_UP	155	0.513922	1.55463	0.000823348	0.0481928	0.0445491	4109	tags=28%, list=11%, signal=25%	3490/3248/6659/8611/28951/6414/10788/10512/10384/84159/9500/10769/694/90362/56898/51176/5159/1287/9635/54149/10765/2182/307/29994/29994/5918/1200/26137/6303/11118/9962/728661/253725/1191/348/6453/8654/10957/8743/2135/6696/7216/5660/55837/6938/1075
WP_CORI_CYCLE	WP_CORI_CYCLE	17	-0.840003	-1.81509	0.00083152	0.0482205	0.0445747	4711	tags=80%, list=13%, signal=70%	5214/5230/6514/2539/6888/2821/2821/7167/3939/3939/3098/226/6517/6517/6513/2875
XU_GH1_AUTOCRINE_TARGETS_DN	XU_GH1_AUTOCRINE_TARGETS_DN	128	0.532465	1.57724	0.000842432	0.0484051	0.0447453	1497	tags=18%, list=4%, signal=17%	7057/3304/3304/3304/3304/3304/2947/63027/3304/3304/3304/3304/3304/3911/5649/7168/3304/3304/3304/3304/3304/56925/83715/3304/3304/3304/3304/3304
REACTOME_ANTIGEN_PROCESSING_CROSS_PRESENTATION	REACTOME_ANTIGEN_PROCESSING_CROSS_PRESENTATION	105	0.5623	1.62093	0.000858059	0.0486594	0.0449804	3380	tags=36%, list=9%, signal=34%	5696/5696/5696/5696/5696/5696/5696/5696/5696/5696/5696/5696/5696/5696/5696/5696/5698/5698/5698/5698/5698/5698/5698/5698/5698/5698/5698/5698/5698/5698/5698/5698/1535/5698/5698/5698/5698/5698/5698/5698/5698/5698/5698/5698/5698/5698/5698/5698/5698/6890/6890/6890/6890/6890/6890/6890/6890/5696/5696/5696/5696/5696/5696/5696/5696/1520/5698/5698/5698/5698/5698/5698/5698/5698/6890/6890/6890/6890/6890/6890…
WP_NEOVASCULARISATION_PROCESSES	WP_NEOVASCULARISATION_PROCESSES	37	0.711502	1.74303	0.000866344	0.0486594	0.0449804	3936	tags=19%, list=11%, signal=17%	7852/284/5971/3815/4090/5594/4791/4088/5966/5599/4851/7043/207/5595/7042/5601
YAGI_AML_WITH_T_8_21_TRANSLOCATION	YAGI_AML_WITH_T_8_21_TRANSLOCATION	367	0.430454	1.41616	0.000880191	0.0486594	0.0449804	4658	tags=13%, list=13%, signal=12%	374/2206/27306/7102/4192/5899/5730/7204/3568/7177/26037/3936/5790/84159/7436/9459/10493/5954/23499/2120/3815/9534/5325/10928/51351/1808/5295/29/29/29/22978/7318/9445/7644/2824/22883/7127/23075/613/83988/10791/7267/11046/11046/23243/10555/9844/8450/1000/166/5335/4065/5064/11120/7915/23331/4856/9641/10618/5966/1312/3073/5926/23474/8644/7360/822/811/858/23111/10957/6786/2589/4345/1441/10782/6571/310…
MCLACHLAN_DENTAL_CARIES_UP	MCLACHLAN_DENTAL_CARIES_UP	257	0.466957	1.49742	0.000880994	0.0486594	0.0449804	4470	tags=13%, list=12%, signal=12%	3487/7852/5328/8942/5552/2124/5997/3514/51338/1535/2550/2550/2550/2550/2550/2550/2550/397/1520/5341/11031/1052/5788/5788/5788/5788/3936/202/4069/629/629/629/629/629/629/629/5734/2207/64092/1890/8832/23657/719/7060/1604/2550/2550/2550/2550/2550/2550/2550/7128/6039/8284/330/8935/8934/10437/6303/23166/822/341/4067/348/1439/51316/4501/951/4495/241/5175/3108/3108/3108/3108/3108/3108/3108/3108/4689/468…
MITSIADES_RESPONSE_TO_APLIDIN_UP	MITSIADES_RESPONSE_TO_APLIDIN_UP	428	0.416447	1.38627	0.000885704	0.0486594	0.0449804	6101	tags=42%, list=17%, signal=35%	374/7852/10365/5997/1520/6003/3280/8519/4616/9693/84159/6046/6046/6046/6046/6046/6046/6046/7084/79668/7718/10475/51276/5264/2669/6606/6606/6606/6606/6606/23704/55603/2696/2717/51566/23237/23275/64092/7738/1051/388/8556/1848/8832/7171/3612/8844/5140/138050/719/5380/10157/22921/6811/10018/23429/23429/3133/3133/3133/3133/3133/3133/3133/3133/3133/3133/3133/3133/3133/3133/3133/3133/3133/3133/3133/3133…
AKL_HTLV1_INFECTION_DN	AKL_HTLV1_INFECTION_DN	69	0.620407	1.66559	0.000903782	0.048864	0.0451696	3352	tags=25%, list=9%, signal=22%	3490/301/3725/3514/163486/8477/158471/9659/1848/23097/55540/4212/9218/5980/5175/51465/4208
RIGGINS_TAMOXIFEN_RESISTANCE_DN	RIGGINS_TAMOXIFEN_RESISTANCE_DN	220	0.480494	1.50926	0.000905034	0.048864	0.0451696	5004	tags=32%, list=14%, signal=27%	7852/4886/8573/5997/7358/4897/1266/1917/9653/11031/10451/10512/1052/3920/10581/54898/9693/84159/202/9936/5836/214/25832/58473/3157/5295/51186/677/256987/55353/55540/57157/7764/1362/347/1829/4801/1645/9111/6772/25800/9848/54477/8754/8754/24138/8743/10611/94134/23022/4739/213/5610/2099/65109/8614/51097/5782/27247/2631/9633/1195/10472/2697/9314/23530/10410/6867/1001/9/1047/10463
REACTOME_P75_NTR_RECEPTOR_MEDIATED_SIGNALLING	REACTOME_P75_NTR_RECEPTOR_MEDIATED_SIGNALLING	96	0.566074	1.60181	0.00092312	0.0494145	0.0456784	3172	tags=25%, list=9%, signal=23%	4168/27018/83464/7204/84033/10451/9826/9500/9459/64857/29/29/29/396/6655/8767/835/10018/100271715/55851/23365/5599/836/6453/9138/51107

## Sheet: GSEA_D3
Supplemental Table 3: Gene Ontology analysis and Transcription factors occupancy analysis for the de-regulated genes between wild type and KMT2D-sgRNA2 mediated knockout (KMT2D KO) HUDEP-2 cells.
ID	Description	setSize	enrichmentScore	NES	pvalue	p.adjust	qvalue	rank	leading_edge	core_enrichment
HALLMARK_HEME_METABOLISM	HALLMARK_HEME_METABOLISM	198	-0.818268	-2.87615	1e-10	2.40885e-08	1.97287e-08	3711	tags=75%, list=10%, signal=68%	1193/4891/80148/26130/54855/114625/10107/10107/10107/10107/10107/10107/10107/10107/10107/10107/10107/10107/10107/10107/10107/10107/9258/9258/10840/50865/27429/6917/7504/286/9541/9429/6535/1182/4140/2908/23052/7389/9663/8867/23351/10171/2035/4059/3321/23039/66008/51257/23112/8273/535/6710/119/23002/64122/2235/5886/3386/440/220972/220972/51274/571/4354/1497/9958/25893/759/5606/25897/1371/2730/682/2…
HALLMARK_MYC_TARGETS_V1	HALLMARK_MYC_TARGETS_V1	199	0.647621	2.37926	1e-10	2.40885e-08	1.97287e-08	8451	tags=65%, list=24%, signal=50%	3939/3939/7416/7324/10549/8454/6632/3181/51491/3837/5496/7284/10236/10236/4869/5230/2739/1964/11137/1854/7332/2806/6629/5690/708/1207/10492/6418/9221/26135/3192/9188/22916/4175/4830/3183/51690/5245/6627/6426/6426/3066/6741/1176/1965/7398/3608/10856/5709/4706/5685/1478/6599/6723/55651/7203/8662/1665/5902/26121/26121/26121/26121/26121/26121/26121/26121/26121/26121/2079/2547/5688/11335/23450/6742/67…
JAATINEN_HEMATOPOIETIC_STEM_CELL_DN	JAATINEN_HEMATOPOIETIC_STEM_CELL_DN	229	-0.620596	-2.22726	1e-10	2.40885e-08	1.97287e-08	3960	tags=34%, list=11%, signal=30%	939/4818/10661/10261/10261/4051/54855/10140/1667/1667/3702/84418/7280/10018/728/7504/2113/4063/84830/3055/948/7535/2215/2841/83716/54504/7057/23533/150000/4860/9263/51257/54674/10444/57125/2268/81606/79838/759/4057/3820/677/6398/4753/129293/51327/3557/28984/4118/10417/221895/645/399665/9314/10628/3669/1032/56261/3689/81027/122416/3043/800/6622/5125/23710/6446/2993/6095/23305/4635/3047/3045/669/60…
BORCZUK_MALIGNANT_MESOTHELIOMA_UP	BORCZUK_MALIGNANT_MESOTHELIOMA_UP	308	0.578361	2.22629	1e-10	2.40885e-08	1.97287e-08	7286	tags=56%, list=20%, signal=45%	5315/2316/6282/1622/4090/1627/23258/2149/8323/3915/10093/9180/1022/1022/7416/9019/9500/9926/10549/642/10434/23299/7040/7321/22920/142/1650/5062/7334/2280/11196/2885/23028/6733/5230/2739/10857/6415/51097/5908/7013/10016/64746/3308/2339/5867/5604/79109/55699/378708/26135/10981/2958/10652/7520/22916/4175/4830/3183/3920/6774/5898/5917/81875/6426/6426/3685/498/11315/813/3608/6102/10899/9261/10771/6636…
REACTOME_MRNA_SPLICING	REACTOME_MRNA_SPLICING	187	0.611096	2.22436	1e-10	2.40885e-08	1.97287e-08	8276	tags=75%, list=23%, signal=59%	56259/10421/8683/3188/6635/6632/3181/4116/6638/10236/10236/10946/4670/10081/9128/5435/6629/11338/1660/5436/9775/10189/1994/3192/3191/3191/10978/22916/3183/27339/51692/51690/55110/6628/6627/6426/6426/3185/6636/5431/1478/1993/79622/84844/51691/1665/10949/26121/26121/26121/26121/26121/26121/26121/26121/26121/26121/84950/51340/8449/8449/8449/8449/8449/8449/8449/8449/81608/8449/8449/8449/8449/8449/844…
REACTOME_PROCESSING_OF_CAPPED_INTRON_CONTAINING_PRE_MRNA	REACTOME_PROCESSING_OF_CAPPED_INTRON_CONTAINING_PRE_MRNA	241	0.586785	2.19375	1e-10	2.40885e-08	1.97287e-08	8611	tags=67%, list=24%, signal=52%	7919/7919/7919/7919/7919/7919/7919/7919/56259/7919/7919/7919/7919/7919/7919/7919/7919/10421/55706/8683/3188/6635/6632/3181/4116/6638/10236/10236/10946/4670/84248/10081/9128/5435/6629/11338/1660/5436/9775/10189/1994/3192/3191/3191/10978/22916/3183/27339/51692/51690/55110/29107/6628/6627/6426/6426/3185/23636/6636/5431/1478/1993/9589/9883/79622/84844/51691/2733/1665/10949/26121/26121/26121/26121/261…
MANALO_HYPOXIA_DN	MANALO_HYPOXIA_DN	289	0.559786	2.14455	1e-10	2.40885e-08	1.97287e-08	9416	tags=65%, list=26%, signal=49%	1718/2653/55612/10419/28231/79084/2710/84908/7372/51022/9987/23076/79071/142/6632/51491/84823/79833/80342/11196/25926/10813/55316/8624/10007/65260/7019/23171/708/55847/10197/55131/56926/9221/378708/39/3192/5822/55199/9188/79711/79711/4175/4830/60491/3416/3954/2395/5245/4172/9391/6627/51154/471/7156/7156/1965/55759/64222/7398/23560/10036/51377/9894/10102/11130/2237/6723/10969/55027/56902/5902/8374…
IBRAHIM_NRF1_UP	IBRAHIM_NRF1_UP	417	0.541336	2.13739	1e-10	2.40885e-08	1.97287e-08	7387	tags=58%, list=21%, signal=47%	4257/5315/865/30011/7358/23516/6263/6646/231/9277/9277/9277/9277/9277/53827/8459/64219/80301/217/644815/23329/9371/2923/130074/64781/6611/9761/1789/2950/10419/11021/25800/7873/9844/6566/6566/9019/79084/6836/6836/5584/4199/642/10130/7321/51347/9583/7170/10484/55726/8454/55760/5954/51491/56945/5770/64841/2597/6185/54888/2885/10236/10236/51605/3945/9277/9277/9277/9277/9277/9277/9277/9277/9277/9277/2…
IVANOVA_HEMATOPOIESIS_MATURE_CELL	IVANOVA_HEMATOPOIESIS_MATURE_CELL	290	-0.58563	-2.13283	1e-10	2.40885e-08	1.97287e-08	4252	tags=37%, list=12%, signal=33%	6510/59/9055/146713/4520/160851/9792/8301/5291/55593/55907/80148/26130/54855/80232/162989/83606/50865/56648/55437/1364/6917/9541/5641/8462/2908/57531/7057/23052/716/84668/8867/8418/117584/23039/66008/51257/54676/63027/23112/148534/535/6710/23002/84440/79628/26262/2268/84986/64122/440/220972/220972/51274/4354/10402/80856/92521/25897/2015/56913/140290/116151/51094/2358/51646/4259/127262/55062/3029/…
YAO_TEMPORAL_RESPONSE_TO_PROGESTERONE_CLUSTER_17	YAO_TEMPORAL_RESPONSE_TO_PROGESTERONE_CLUSTER_17	184	0.58657	2.13119	1e-10	2.40885e-08	1.97287e-08	6348	tags=59%, list=18%, signal=49%	7171/8611/54948/203068/203068/203068/203068/203068/203068/203068/203068/58527/60/54958/2950/55486/9791/7317/3157/10434/8683/83475/79073/207/1059/27166/801/1650/23471/7126/56945/2790/2063/10072/6185/2280/65108/9616/1964/8624/10055/654364/51144/8725/6418/414919/9775/7520/1652/1652/1652/51690/63931/8260/7398/9261/4706/11344/4043/10980/22839/51258/3632/9589/4712/6390/1460/1460/1460/1460/1460/1460/146…
YAO_TEMPORAL_RESPONSE_TO_PROGESTERONE_CLUSTER_13	YAO_TEMPORAL_RESPONSE_TO_PROGESTERONE_CLUSTER_13	177	0.591052	2.12991	1e-10	2.40885e-08	1.97287e-08	6849	tags=50%, list=19%, signal=41%	301/1535/1622/100996928/3956/138151/6281/5479/1465/84817/28988/6941/6941/6941/6941/6941/6941/6941/5935/51571/51241/3188/10447/6635/7905/80777/4074/122704/1611/84316/595/347734/4664/9158/3460/3460/522/84833/4363/4363/2958/83460/29887/374882/10682/5721/5721/3191/3191/22916/29103/4717/2287/5191/3460/3460/11315/388753/28998/302/6277/84309/51691/11054/51079/23423/4704/59286/51699/6941/6941/6941/6941/6…
IVANOVA_HEMATOPOIESIS_EARLY_PROGENITOR	IVANOVA_HEMATOPOIESIS_EARLY_PROGENITOR	444	0.522657	2.08609	1e-10	2.40885e-08	1.97287e-08	7864	tags=52%, list=22%, signal=42%	865/55819/84456/9840/8530/149951/149951/100996928/5019/2769/56259/58527/205/140707/9647/401397/22858/23550/375387/6103/1635/26022/2653/9306/126792/143458/53354/112616/9761/1465/2135/64949/51060/7873/4249/969/79029/58489/9941/29967/7372/114804/79892/199953/57679/692312/4602/84678/142/118980/56267/26003/200933/223082/23598/80777/6697/64841/79070/51678/11196/6693/55170/84864/80150/57486/79596/84248/…
TARTE_PLASMA_CELL_VS_PLASMABLAST_DN	TARTE_PLASMA_CELL_VS_PLASMABLAST_DN	307	0.539328	2.07526	1e-10	2.40885e-08	1.97287e-08	6170	tags=61%, list=17%, signal=51%	3248/397/10788/5579/2316/1043/4478/1622/1718/9168/8826/2171/2821/2821/3956/7155/5214/6281/2589/309/1192/1192/1192/1192/1192/1192/1192/1192/1192/1192/1192/1192/1192/1192/1192/1192/1192/1192/1192/1192/1192/1192/1192/1192/1192/1192/1192/1192/1192/1192/1192/1192/1192/1192/1192/1192/1192/1192/1192/1192/1192/1192/7416/9844/6566/6566/5696/5696/5696/5696/5696/5696/5696/5696/642/23076/10200/8726/5770/5062…
FOURNIER_ACINAR_DEVELOPMENT_LATE_2	FOURNIER_ACINAR_DEVELOPMENT_LATE_2	279	0.542911	2.07075	1e-10	2.40885e-08	1.97287e-08	8633	tags=54%, list=24%, signal=41%	87/2316/71/2317/23597/5216/2118/7919/7919/7919/7919/7919/7919/7919/7919/3939/3939/60/2653/6611/55612/7184/10419/7004/7873/7919/7919/7919/7919/7919/7919/7919/7919/3241/396/55706/7317/10487/51002/10434/7414/10130/79071/3693/207/10447/801/3654/79833/7334/29883/10113/10253/5230/2782/2004/8061/10055/64943/993/1854/9128/53838/7371/51330/5690/9221/26155/4175/60491/11198/4172/6628/6627/6741/79053/23170/7…
WONG_EMBRYONIC_STEM_CELL_CORE	WONG_EMBRYONIC_STEM_CELL_CORE	335	0.535253	2.06517	1e-10	2.40885e-08	1.97287e-08	8276	tags=55%, list=23%, signal=43%	54948/7358/2023/205/9601/6566/6566/7205/79084/84908/51116/6949/1075/6941/6941/6941/6941/6941/6941/6941/84365/586/10434/60436/79071/142/6632/1871/79833/83879/10072/5496/51805/57486/2739/10007/64943/595/5435/3276/4001/7013/4691/1892/8577/6418/55920/55920/522/55847/10197/1660/4913/3692/2271/3033/7520/3191/3191/22916/7341/5245/4172/6627/6741/51182/51154/27034/10856/10036/4706/1104/28998/7326/10969/55…
RHEIN_ALL_GLUCOCORTICOID_THERAPY_DN	RHEIN_ALL_GLUCOCORTICOID_THERAPY_DN	363	0.526454	2.04651	1e-10	2.40885e-08	1.97287e-08	7823	tags=64%, list=22%, signal=51%	6526/28978/51309/55353/3490/203068/203068/203068/203068/203068/203068/203068/203068/10473/4282/4282/5019/2171/2023/5698/5698/5698/5698/5698/5698/5698/5698/2821/2821/55165/3939/3939/5698/5698/5698/5698/5698/5698/5698/5698/4232/4925/54360/5698/5698/5698/5698/5698/5698/5698/5698/1635/2653/6611/5698/5698/5698/5698/5698/5698/5698/5698/5698/5698/5698/5698/5698/5698/5698/5698/7416/5696/5696/5696/5696/56…
TORCHIA_TARGETS_OF_EWSR1_FLI1_FUSION_DN	TORCHIA_TARGETS_OF_EWSR1_FLI1_FUSION_DN	317	0.529438	2.03926	1e-10	2.40885e-08	1.97287e-08	4962	tags=39%, list=14%, signal=34%	7431/3487/946/9452/822/3936/9535/1794/161742/26228/10788/84456/10659/28951/9168/51162/7456/53346/4282/4282/5019/5899/5698/5698/5698/5698/5698/5698/5698/5698/3340/3956/9057/5788/5788/56935/5788/5788/5698/5698/5698/5698/5698/5698/5698/5698/10095/5698/5698/5698/5698/5698/5698/5698/5698/51809/10555/81539/92241/1266/5698/5698/5698/5698/5698/5698/5698/5698/5698/5698/5698/5698/5698/5698/5698/5698/7163/2…
GARY_CD5_TARGETS_DN	GARY_CD5_TARGETS_DN	430	0.50731	2.0113	1e-10	2.40885e-08	1.97287e-08	7944	tags=37%, list=22%, signal=30%	7358/6646/1429/54809/205/54332/140707/8934/51809/4149/399/23753/5479/7184/7873/79077/79084/6924/8099/259230/7372/79691/5935/23076/10130/10384/7247/56652/27166/84287/80777/55748/3837/79833/29883/64924/221830/11218/11196/23203/25926/9689/121457/57486/1964/4670/55661/993/22929/7332/64983/29101/55276/9774/7019/51726/54931/29777/3308/10492/55161/55915/1660/9373/51808/9841/9221/28991/54865/26135/50628/…
GRADE_COLON_AND_RECTAL_CANCER_UP	GRADE_COLON_AND_RECTAL_CANCER_UP	287	0.523725	2.0002	1e-10	2.40885e-08	1.97287e-08	6705	tags=33%, list=19%, signal=27%	5315/8519/4061/4061/7188/55353/7076/2118/7919/7919/7919/7919/7919/7919/7919/7919/53827/3939/3939/2653/55612/5328/1022/1022/7919/7919/7919/7919/7919/7919/7919/7919/9791/3916/10549/3693/2114/5954/3181/8813/3654/79833/23333/1454/7334/83879/51337/3945/4869/2739/8624/55661/22929/54849/10016/8725/56954/3308/10492/6418/1660/22803/5684/79183/3692/221150/55257/5464/4172/6628/51371/6426/6426/6741/471/8260/…
HOLLMANN_APOPTOSIS_VIA_CD40_DN	HOLLMANN_APOPTOSIS_VIA_CD40_DN	260	0.526962	1.98884	1e-10	2.40885e-08	1.97287e-08	5617	tags=47%, list=16%, signal=40%	7431/9516/29108/8519/9535/6282/7358/837/23597/6711/23424/5698/5698/5698/5698/5698/5698/5698/5698/9647/5698/5698/5698/5698/5698/5698/5698/5698/10069/55081/5698/5698/5698/5698/5698/5698/5698/5698/4258/4065/23258/5092/537/5698/5698/5698/5698/5698/5698/5698/5698/5698/5698/5698/5698/5698/5698/5698/5698/9456/56898/10911/4853/3133/3133/3133/3133/3133/3133/3133/3133/3133/3133/3133/3133/3133/3133/3133/313…
MUELLER_PLURINET	MUELLER_PLURINET	298	0.511303	1.96293	1e-10	2.40885e-08	1.97287e-08	6880	tags=48%, list=19%, signal=39%	6809/1718/5216/5777/112939/1616/1616/1616/1616/1616/1616/25898/1729/1789/3815/1022/1022/10419/79077/943/79084/84908/6949/4145/26227/8673/4602/142/6635/7408/6632/3837/7374/79833/8932/51678/4793/4793/6638/4869/9094/348/6606/6606/6606/6606/6606/22929/10940/595/654364/2806/4691/51010/842/10492/578/6418/7718/10197/5684/4913/9221/26155/5481/5757/7917/7917/7917/7917/7917/7917/7917/7520/596/5829/4175/483…
ZHANG_BREAST_CANCER_PROGENITORS_UP	ZHANG_BREAST_CANCER_PROGENITORS_UP	429	0.485962	1.92811	1e-10	2.40885e-08	1.97287e-08	7585	tags=42%, list=21%, signal=34%	7358/5169/284307/1429/5019/55165/23043/79047/29091/4718/81539/53354/7416/7529/149076/9019/7158/92092/57587/92906/10927/9987/51361/4602/142/23598/3181/7374/79833/3925/51765/83879/51605/9616/11137/993/11171/10440/139231/6629/196/10526/643155/10492/55161/1829/8187/4756/84216/26135/10513/39/171568/2271/7520/3192/596/51690/4717/5191/7561/29922/6741/374879/11315/7398/92140/8883/51377/1787/5431/1478/231…
JAATINEN_HEMATOPOIETIC_STEM_CELL_UP	JAATINEN_HEMATOPOIETIC_STEM_CELL_UP	311	0.499204	1.92542	1e-10	2.40885e-08	1.97287e-08	4084	tags=26%, list=11%, signal=24%	27306/25925/51309/10788/3087/2624/221692/55353/3490/81618/216/85461/11001/51186/2171/2769/84679/4232/54360/84293/51809/79047/2149/2653/23243/9306/1612/57460/1789/3815/10419/56034/8835/7205/285203/8099/84650/154043/79921/10549/5325/2120/586/51232/51232/10451/8936/55179/4602/375449/5954/7552/116966/84937/7374/3925/79070/83879/100505687/286319/8204/8624/64943/6595/6856/54841/1829/7718/4363/4363/2078…
REN_ALVEOLAR_RHABDOMYOSARCOMA_DN	REN_ALVEOLAR_RHABDOMYOSARCOMA_DN	406	0.472643	1.85989	1e-10	2.40885e-08	1.97287e-08	3504	tags=31%, list=10%, signal=29%	301/2200/822/7171/87/284119/4061/4061/4478/2034/7358/7791/7791/23516/3490/10092/4240/837/8826/7076/7048/10365/55013/53827/57175/1174/5480/3340/8459/1471/9638/7132/6281/10095/4925/2589/1192/1192/1192/1192/1192/1192/1192/2771/1192/1192/1192/1192/1192/1192/1192/1192/1192/1192/1192/1192/1192/1192/1192/1192/1192/1192/1192/1192/1192/1192/1192/1192/1192/1192/1192/1192/1192/1192/1192/1192/1192/1192/1192/…
SPIELMAN_LYMPHOBLAST_EUROPEAN_VS_ASIAN_UP	SPIELMAN_LYMPHOBLAST_EUROPEAN_VS_ASIAN_UP	480	0.456129	1.81968	1e-10	2.40885e-08	1.97287e-08	6741	tags=41%, list=19%, signal=34%	397/2200/6282/1622/71/203068/203068/203068/203068/203068/203068/203068/203068/1718/5552/5216/5777/6300/23499/53346/1471/5778/3385/7916/7916/7916/7916/7916/7916/7916/5479/10093/3937/3099/1445/5912/7205/10421/10755/6949/8879/4218/9466/9466/100272147/3157/9987/60436/23463/5037/166/51067/4212/2629/2629/10452/5585/142/10099/801/7408/2794/2794/2794/2794/2794/2794/2794/2794/6632/1796/3181/80777/54535/54…
REACTOME_NEUTROPHIL_DEGRANULATION	REACTOME_NEUTROPHIL_DEGRANULATION	476	0.447522	1.78824	1e-10	2.40885e-08	1.97287e-08	7721	tags=42%, list=22%, signal=34%	29108/4257/5315/1520/6947/9535/1512/1794/8635/10788/6282/1535/55/51411/203068/203068/203068/203068/203068/203068/203068/203068/10092/5836/8826/5777/11001/4282/4282/2171/196527/2760/2821/2821/1471/80301/5788/5788/5788/5788/10555/4718/1675/1675/5269/5553/1729/5328/9761/2950/4033/5912/1265/3071/6836/6836/353376/5223/54918/23526/10321/3916/2992/8907/28988/1075/10549/340061/340061/6709/10487/3163/3163…
REACTOME_HIV_INFECTION	REACTOME_HIV_INFECTION	229	0.539141	2.00288	1.08278e-10	2.45607e-08	2.01155e-08	7806	tags=59%, list=22%, signal=47%	1794/1174/8905/5698/5698/5698/5698/5698/5698/5698/5698/5698/5698/5698/5698/5698/5698/5698/5698/5698/5698/5698/5698/5698/5698/5698/5698/92421/5698/5698/5698/5698/5698/5698/5698/5698/5698/5698/5698/5698/5698/5698/5698/5698/1022/1022/2968/2968/2968/2968/2968/2968/9844/5696/5696/5696/5696/5696/5696/5696/5696/6924/8907/55690/9397/55706/54457/3837/5062/2068/567/567/4869/79720/91782/5696/5696/5696/5696/…
GRYDER_PAX3FOXO1_ENHANCERS_KO_DOWN	GRYDER_PAX3FOXO1_ENHANCERS_KO_DOWN	438	0.450607	1.79753	1.09804e-10	2.45607e-08	2.01155e-08	5466	tags=32%, list=15%, signal=27%	7431/26060/9672/81553/10659/71/3566/4282/4282/58527/8573/2889/4232/60/1635/81539/5092/143458/79180/26037/57134/1612/57460/1465/2139/57190/7416/2137/23433/10109/145773/9844/4853/7325/222223/140766/51315/55690/259230/58492/10487/975/92797/23076/51241/143/166/4212/142/23619/55760/5954/51465/80775/92675/4074/64429/10946/2739/57720/5573/729920/8872/55277/6595/139231/2590/4001/55619/29101/90861/55832/3…
HALLMARK_OXIDATIVE_PHOSPHORYLATION	HALLMARK_OXIDATIVE_PHOSPHORYLATION	200	0.551912	2.02968	1.20394e-10	2.6001e-08	2.12952e-08	9861	tags=68%, list=27%, signal=50%	2821/2821/3939/3939/4718/537/56898/7416/840/8604/56945/3028/23203/3945/10440/5435/2806/1892/4708/2746/51660/522/518/54704/2230/2271/211/2395/4717/498/4706/6832/4712/10128/4707/6390/7388/34/5264/54884/4329/1666/92609/6183/6183/8992/3419/10632/29088/7386/4704/1737/4191/9377/26517/10935/30/1345/56993/9131/64963/1353/27089/65003/1738/7384/4702/9617/4129/9868/4190/3420/7417/26521/4709/506/4552/1337/51…
SHEN_SMARCA2_TARGETS_UP	SHEN_SMARCA2_TARGETS_UP	428	0.456017	1.80456	1.39058e-10	2.90307e-08	2.37765e-08	7806	tags=45%, list=22%, signal=36%	28978/55819/10473/23499/5899/55786/9306/51315/2992/8804/3188/79624/7247/8604/22920/8726/57045/8813/23683/55788/9741/2776/159/10951/23201/64924/64429/11196/8195/8195/8195/27336/5573/6595/22929/3895/51292/51292/4664/4763/7879/5509/55863/9774/55832/56271/114882/27020/51406/5867/51652/23189/7507/9646/10513/55032/7520/9685/26275/26065/26065/79068/3416/7341/6741/63931/167227/7398/27236/10771/5610/7326/…
RAMALHO_STEMNESS_UP	RAMALHO_STEMNESS_UP	196	0.55049	2.01591	1.84297e-10	3.7234e-08	3.04951e-08	7426	tags=53%, list=21%, signal=42%	401251/401251/401251/401251/401251/401251/55353/51186/5480/9057/7525/2149/2653/11328/55352/79077/7529/8835/7205/8099/51116/54700/54700/7372/84365/9202/79071/10484/5954/116064/9741/10040/11196/2739/2782/595/8725/64393/51136/80789/10199/55699/39/7520/51303/8398/55341/23528/84916/84916/5191/5464/5635/29934/9238/81887/34/83743/94039/29078/11102/5717/4086/9196/8491/3796/24148/9439/10190/57157/9100/880…
HSIAO_HOUSEKEEPING_GENES	HSIAO_HOUSEKEEPING_GENES	394	0.4652	1.82552	1.93621e-10	3.78953e-08	3.10367e-08	5696	tags=24%, list=16%, signal=21%	7431/397/8519/2316/4478/7114/377/71/9168/6711/5216/8826/5777/311/7919/7919/7919/7919/7919/7919/7919/7919/2023/3956/3939/3939/1471/2752/6281/60/4258/1192/1192/1192/1192/1192/1192/1192/1192/1192/1192/1192/1192/1192/1192/1192/1192/1192/1192/1192/1192/1192/1192/1192/1192/1192/1192/1192/1192/1192/1192/1192/1192/1192/1192/1192/1192/1192/1192/1192/1192/1192/1192/5269/5355/2950/1072/10109/7529/3133/3133/…
OSMAN_BLADDER_CANCER_UP	OSMAN_BLADDER_CANCER_UP	393	0.465202	1.82201	2.03697e-10	3.86592e-08	3.16623e-08	5645	tags=33%, list=16%, signal=28%	6015/6015/6015/6015/6015/6015/5315/7171/26060/2316/3490/8826/57567/11213/10365/4090/2023/51338/3939/3939/5788/5788/5788/5788/1836/2589/217/6645/6645/57085/2923/143458/6688/55784/9765/121274/25939/83636/10093/157/7184/23433/6645/6645/8835/9749/3071/9926/26191/5937/1075/100131017/5922/719/10434/143/23299/3140/7040/1997/89857/7408/25917/3837/81542/10087/25832/81926/159/11165/54462/2782/8204/6789/100…
MITSIADES_RESPONSE_TO_APLIDIN_DN	MITSIADES_RESPONSE_TO_APLIDIN_DN	250	0.519493	1.94577	2.14518e-10	3.95155e-08	3.23637e-08	6543	tags=52%, list=18%, signal=43%	6526/865/203068/203068/203068/203068/203068/203068/203068/203068/1718/6711/8826/23499/2821/2821/5339/81539/130074/64781/60509/55612/4853/4771/5576/9500/5223/120/55706/10434/23299/4602/142/25832/11165/47/10236/10236/2782/7915/1108/1854/23254/8725/90861/6850/114882/79022/5867/9801/9697/1994/3033/55893/11198/839/167227/1827/55326/55326/10036/10000/10000/55734/5431/11130/5610/9703/8943/8766/3614/5512…
BASSO_B_LYMPHOCYTE_NETWORK	BASSO_B_LYMPHOCYTE_NETWORK	143	0.602566	2.14862	2.67233e-10	4.78195e-08	3.91647e-08	5470	tags=51%, list=15%, signal=43%	9516/9452/8519/79026/1512/5579/3087/7805/3709/7791/7791/23516/5552/837/3956/309/4131/3133/3133/3133/3133/3133/3133/3133/3133/3133/3133/3133/3133/3133/3133/3133/3133/3133/3133/3133/3133/3133/3133/3133/3133/3133/3133/3133/3133/3965/23474/10549/9466/9466/642/10627/10452/51491/54103/10440/5435/7371/7011/5690/3708/6275/5684/26135/4830/6426/6426/1965/10856/10771/4706/6636/1104/2237/10969/6749/23481/674…
SCHLOSSER_MYC_TARGETS_REPRESSED_BY_SERUM	SCHLOSSER_MYC_TARGETS_REPRESSED_BY_SERUM	159	0.584894	2.08715	3.80364e-10	6.61728e-08	5.41963e-08	7887	tags=59%, list=22%, signal=46%	1635/91/10269/3099/25800/6566/6566/5223/642/10434/10130/51491/81542/159/1454/7334/3945/27309/11137/8624/6606/6606/6606/6606/6606/7019/1660/9221/55699/9775/26135/2271/8539/6426/6426/3066/6741/79053/1965/8883/6636/6599/7326/3704/4712/56902/351/5902/27000/11335/6742/6742/6742/6742/3419/23014/22948/9538/9100/22868/1353/7307/10523/86/25983/3336/10213/79572/3838/9868/27230/7295/10694/1615/29889/5901/23…
RODWELL_AGING_KIDNEY_UP	RODWELL_AGING_KIDNEY_UP	486	0.433547	1.72946	4.75374e-10	8.04667e-08	6.59032e-08	4970	tags=23%, list=14%, signal=21%	7431/7177/397/2200/412/401115/8519/9535/123920/87/1794/4061/4061/7805/139818/81553/10659/81618/54843/57580/4240/5552/3059/9168/5216/7076/118429/9277/9277/9277/9277/9277/4067/5777/28638/53827/54809/5698/5698/5698/5698/5698/5698/5698/5698/5294/58527/441168/5788/5788/5788/5788/5698/5698/5698/5698/5698/5698/5698/5698/10095/5698/5698/5698/5698/5698/5698/5698/5698/54863/4065/1192/1192/1192/1192/1192/11…
HOSHIDA_LIVER_CANCER_SUBCLASS_S1	HOSHIDA_LIVER_CANCER_SUBCLASS_S1	232	0.524464	1.94789	7.51134e-10	1.23799e-07	1.01393e-07	2003	tags=10%, list=6%, signal=10%	301/397/9516/2200/1520/3936/865/6809/2316/7805/6282/4478/7114/1535/7188/10659/5552/3059/5216/8826/4067/3561/4681/9641/5899/5480/3956/5788/5788/5788/5788/6281/10095/2771/8682/537/5355/4131/2950/10419/10109/307/25800/2669/7158/8099/3965/2275/1075/4199/1462/719/10200/8525/5585/951/10099/4074/3945/5230/8439/1854/5500/5834
IVANOVA_HEMATOPOIESIS_INTERMEDIATE_PROGENITOR	IVANOVA_HEMATOPOIESIS_INTERMEDIATE_PROGENITOR	133	0.601049	2.10828	1.35007e-09	2.08079e-07	1.70419e-07	7185	tags=62%, list=20%, signal=50%	946/29108/10227/1622/5214/113189/728489/10073/23753/113523636/113523636/113523636/113523636/113523636/113523636/113523636/55486/79084/5223/840/23071/79624/6838/6838/150223/11218/51605/347734/55847/9373/5684/119559/6341/3692/60488/81875/80006/6184/147949/9245/55326/55326/56061/89891/23481/9238/57412/2971/92170/6746/113523636/113523636/113523636/113523636/113523636/113523636/113523636/113523636/113…
WANG_TUMOR_INVASIVENESS_UP	WANG_TUMOR_INVASIVENESS_UP	382	0.451102	1.76954	1.36217e-09	2.08079e-07	1.70419e-07	7823	tags=49%, list=22%, signal=39%	7431/5315/8519/9394/1622/71/203068/203068/203068/203068/203068/203068/203068/203068/10092/9168/6711/118429/10581/2023/27018/2752/4718/3915/11328/7184/4771/1265/6776/8879/11164/3157/7414/51107/692312/967/22920/5351/79575/3181/3837/6046/6046/6046/6046/6046/6046/6046/2597/10072/23203/10236/10236/22800/4869/5573/8624/8540/11171/595/4691/7879/79002/5825/2746/3308/6850/11338/10094/7430/1994/26135/39/31…
REACTOME_RHO_GTPASE_CYCLE	REACTOME_RHO_GTPASE_CYCLE	446	0.441509	1.76178	1.32051e-09	2.08079e-07	1.70419e-07	5958	tags=30%, list=17%, signal=25%	7431/397/347902/4689/4689/7171/87/1794/752/284119/10788/50619/139818/1535/51291/7409/71/57580/6711/8826/7919/7919/7919/7919/7919/7919/7919/7919/7456/84033/23344/4168/1627/2889/5361/57572/60/89846/9826/399/393/29941/537/23616/79180/57473/1729/55843/1445/23433/9138/93663/7919/7919/7919/7919/7919/7919/7919/7919/396/29/29/29/3071/23526/56667/120/23075/10810/6709/613/3163/3163/10451/8936/57679/144402/…
MULLIGHAN_MLL_SIGNATURE_1_UP	MULLIGHAN_MLL_SIGNATURE_1_UP	378	0.451761	1.76652	2.27657e-09	3.3948e-07	2.78038e-07	5901	tags=39%, list=16%, signal=33%	29108/5315/822/412/3936/865/2316/7805/1535/64110/3490/5780/3059/9454/23424/2023/3956/56935/10095/23550/4258/8934/6688/79180/85021/10093/6770/54939/10109/55486/4033/5696/5696/5696/5696/5696/5696/5696/5696/10421/64780/29/29/29/23526/3916/26191/2242/3588/10097/3140/79961/801/5351/3654/81926/4074/10892/80342/2885/64747/54765/1201/1201/9094/8772/5696/5696/5696/5696/5696/5696/5696/5696/5696/5696/5696/5…
ENK_UV_RESPONSE_KERATINOCYTE_DN	ENK_UV_RESPONSE_KERATINOCYTE_DN	480	0.428219	1.70834	3.40469e-09	4.95897e-07	4.06146e-07	7283	tags=42%, list=20%, signal=34%	7358/7048/23499/8459/7155/7525/9638/7132/109/6103/6645/6645/2653/8323/9249/1266/2137/6645/6645/6566/6566/7158/5584/9397/7372/3588/9987/642/1102/9338/10097/51232/51232/23543/23543/3693/8936/10200/22920/9583/142/10484/8454/80777/81542/5770/8932/2776/7334/3703/10951/10892/2597/9375/8202/10236/10236/54765/5573/8872/8624/8540/6595/4277/4277/4277/4277/4277/4277/4277/4277/1854/8570/3895/9128/7013/6856/1…
CHIANG_LIVER_CANCER_SUBCLASS_UNANNOTATED_DN	CHIANG_LIVER_CANCER_SUBCLASS_UNANNOTATED_DN	190	0.541573	1.97773	3.6172e-09	5.11686e-07	4.19077e-07	8650	tags=59%, list=24%, signal=45%	1622/1875/6281/1266/25800/7873/7105/9500/84650/10549/26175/26175/51002/112858/10130/26996/6632/8813/81542/2519/3703/9375/23478/55170/5230/8624/6856/84259/708/1207/1603/22803/9897/7520/51303/65080/51643/471/3608/28998/2237/9532/58505/729967/28985/28985/30968/10067/10067/10067/10067/10949/6183/6183/10459/128/4200/226/7386/5683/8520/51719/64431/51649/3015/5955/4436/7411/29071/29071/22919/2193/387/22…
THEILGAARD_NEUTROPHIL_AT_SKIN_WOUND_DN	THEILGAARD_NEUTROPHIL_AT_SKIN_WOUND_DN	226	0.521102	1.94512	3.6765e-09	5.11686e-07	4.19077e-07	7311	tags=35%, list=20%, signal=28%	7431/397/4689/4689/87/1794/5579/3087/10659/3059/8826/311/155066/8459/3385/10095/2771/91/393/10269/9138/9600/7903/120/1102/4212/7040/207/51347/801/5987/5987/5987/5987/5987/5987/5987/2776/10951/2280/47/6733/5573/473/8772/832/9962/392/6595/6418/3281/1660/3275/10094/317/11151/7520/6426/6426/156/7398/11344/9637/818/11329/7764/5499/678/5595/4200/841/5140/10935/10928/6726/8895/5501/7454/10423/976/2319/1…
MULLIGHAN_MLL_SIGNATURE_2_UP	MULLIGHAN_MLL_SIGNATURE_2_UP	414	0.442301	1.74939	3.89425e-09	5.3021e-07	4.34249e-07	6361	tags=36%, list=18%, signal=30%	29108/5315/822/412/3936/865/2316/7805/1535/64110/3490/5780/5552/3059/8826/23424/8905/2023/3956/56935/9638/23550/4258/5339/8934/6688/79180/85021/10093/54939/10109/55486/5696/5696/5696/5696/5696/5696/5696/5696/10421/64780/29/29/29/23526/3916/26191/2242/26175/26175/3588/10097/3140/79961/10226/5351/3654/81926/4074/10892/80342/2885/64747/54765/1201/1201/9094/8772/5696/5696/5696/5696/5696/5696/5696/569…
PUJANA_BRCA2_PCC_NETWORK	PUJANA_BRCA2_PCC_NETWORK	419	0.431777	1.7032	5.13113e-09	6.7123e-07	5.49745e-07	9437	tags=48%, list=26%, signal=36%	397/9452/7409/10473/28638/7919/7919/7919/7919/7919/7919/7919/7919/2051/2051/2769/27040/399/5588/7919/7919/7919/7919/7919/7919/7919/7919/79084/6776/9791/26191/3157/642/1102/10200/4602/80777/5062/7374/3925/10951/3150/23028/27309/8540/22929/1854/9128/4001/5897/51176/961/79022/79621/4363/4363/6940/5436/39/1138/5889/7520/9685/4175/56242/4172/6628/839/6627/4775/167227/7398/11146/80742/80742/80742/80742…
CHARAFE_BREAST_CANCER_LUMINAL_VS_MESENCHYMAL_DN	CHARAFE_BREAST_CANCER_LUMINAL_VS_MESENCHYMAL_DN	461	0.425495	1.69844	5.14434e-09	6.7123e-07	5.49745e-07	4611	tags=44%, list=13%, signal=40%	301/7431/2200/123920/87/284119/4478/30011/71/3628/3490/203068/203068/203068/203068/203068/203068/203068/203068/81618/6646/4240/5552/231/5836/6711/7076/118429/84034/100506144/4067/7048/7456/53827/5139/51186/8905/5698/5698/5698/5698/5698/5698/5698/5698/5214/5698/5698/5698/5698/5698/5698/5698/5698/23216/5698/5698/5698/5698/5698/5698/5698/5698/23258/7798/3915/23243/84912/5698/5698/5698/5698/5698/5698…
BOYAULT_LIVER_CANCER_SUBCLASS_G3_UP	BOYAULT_LIVER_CANCER_SUBCLASS_G3_UP	188	0.535541	1.95574	5.40525e-09	6.90879e-07	5.65838e-07	7381	tags=52%, list=21%, signal=41%	2023/55165/1192/1192/1192/1192/1192/1192/1192/1192/1192/1192/1192/1192/1192/1192/1192/1192/1192/1192/1192/1192/1192/1192/1192/1192/1192/1192/1192/1192/1192/1192/1192/1192/1192/1192/1192/1192/1192/1192/1192/1192/1192/1192/7163/10093/10419/29967/55706/51002/7247/2717/80777/3837/81542/23095/3925/10236/10236/25926/5230/2782/5573/11137/56270/7371/51192/10197/1192/1192/1192/1192/1192/1192/1192/55131/27…
JOHNSTONE_PARVB_TARGETS_2_UP	JOHNSTONE_PARVB_TARGETS_2_UP	145	0.570036	2.02657	5.78567e-09	7.24712e-07	5.93548e-07	5586	tags=25%, list=16%, signal=21%	3487/5315/8519/284119/2316/4061/4061/6282/7791/7791/71/231/53827/57175/60/23043/8934/2771/10555/220323/9636/1072/396/54918/6709/7423/7040/5585/8237/567/567/2280/55611/10468/64112/64112/1917/55199/3434/4088/9034/256586/22839/58485/4707/3105/3105/3105/3105/3105/3105/3105/3105/2194/6813/6813/7852/113178/5524/3105/3105/3105/3105/3105/3105/3105/3105/253980/3437/334/3105/3105/3105/3105/3105/3105/3105/3…
VALK_AML_CLUSTER_8	VALK_AML_CLUSTER_8	25	-0.883941	-2.2252	6.79842e-09	8.34873e-07	6.83771e-07	3404	tags=88%, list=9%, signal=80%	999/5087/286/9429/6535/10826/4059/66008/2235/6886/4601/10133/80344/80344/56180/6622/23762/2994/2993/7145/10098/6006/8991
VALK_AML_CLUSTER_7	VALK_AML_CLUSTER_7	26	-0.873985	-2.22229	7.77152e-09	9.3602e-07	7.66611e-07	3385	tags=86%, list=9%, signal=78%	10107/10107/10107/10107/10107/10107/10107/10107/10107/10107/10107/10107/10107/10107/10107/10107/286/6535/1182/10826/2035/6710/6886/10107/10107/10107/10107/10107/10107/10107/10107/3792/3792/2996/9518/23762/4635/6536/6513/5909/10107/10107/10107/10107/10107/10107/10107/10107/10107/10107/10107/10107/10107/10107/10107/10107/10107/10107/10107/10107/10107/10107/10107/10107/7145/6006/10107/10107/10107/10…
GRUETZMANN_PANCREATIC_CANCER_UP	GRUETZMANN_PANCREATIC_CANCER_UP	353	0.451188	1.75124	1.248e-08	1.47476e-06	1.20785e-06	6313	tags=47%, list=18%, signal=40%	3248/301/2200/5315/3936/865/1794/7805/6282/4478/10227/10659/3628/203068/203068/203068/203068/203068/203068/203068/203068/3566/5780/5552/837/9168/5836/5216/8826/10473/10581/4681/2171/2023/5899/2760/2821/2821/3939/3939/5788/5788/5788/5788/6281/5339/1192/1192/1192/1192/1192/1192/1192/1192/1192/1192/1192/1192/1192/1192/1192/1192/1192/1192/1192/1192/1192/1192/1192/1192/1192/1192/1192/1192/1192/1192/11…
WANG_SMARCE1_TARGETS_DN	WANG_SMARCE1_TARGETS_DN	377	0.44183	1.72304	1.60288e-08	1.85905e-06	1.52258e-06	6051	tags=48%, list=17%, signal=41%	3976/51083/4061/4061/79623/3576/3566/5552/231/23597/1875/5698/5698/5698/5698/5698/5698/5698/5698/441168/7223/5698/5698/5698/5698/5698/5698/5698/5698/5698/5698/5698/5698/5698/5698/5698/5698/51809/80758/6611/5698/5698/5698/5698/5698/5698/5698/5698/5698/5698/5698/5698/5698/5698/5698/5698/7163/25939/79750/3099/28231/6890/6890/6890/6890/6890/6890/6890/6890/5696/5696/5696/5696/5696/5696/5696/5696/6891/…
WONG_MITOCHONDRIA_GENE_MODULE	WONG_MITOCHONDRIA_GENE_MODULE	216	0.505669	1.88344	1.85943e-08	2.11739e-06	1.73417e-06	11162	tags=75%, list=31%, signal=52%	1429/5019/4718/81034/537/55349/79814/1728/2820/79751/10452/6549/118980/7374/3028/51805/7284/1854/8209/2806/64983/1892/4708/7019/9158/2746/522/518/54704/4285/6341/27349/2271/596/4717/6342/4706/64087/64087/64087/10102/51103/28998/4712/10128/4707/6390/9121/204/4329/1666/10632/7386/4704/9377/80263/26517/150274/30061/475/1345/9131/1353/27089/65003/8192/1738/285521/51651/4702/55967/79572/9868/7417/2652…
MOHANKUMAR_HOXA1_TARGETS_UP	MOHANKUMAR_HOXA1_TARGETS_UP	403	0.436375	1.71337	1.97368e-08	2.20735e-06	1.80785e-06	6825	tags=42%, list=19%, signal=35%	9516/5315/51083/2034/377/203068/203068/203068/203068/203068/203068/203068/203068/9277/9277/9277/9277/9277/79754/57175/54332/3939/3939/4232/10095/10745/7916/7916/7916/7916/7916/7916/7916/537/10269/9456/7184/23433/55486/7078/79084/54898/54918/57669/7324/3776/55706/3705/3705/10959/92906/60436/23463/79624/51361/10452/2717/55726/80777/9797/253782/51765/10072/6185/65108/9375/2885/3945/9277/9277/9277/92…
REACTOME_MITOCHONDRIAL_TRANSLATION	REACTOME_MITOCHONDRIAL_TRANSLATION	93	0.635334	2.11651	2.1137e-08	2.31192e-06	1.89349e-06	11162	tags=86%, list=31%, signal=59%	54948/64949/51116/64975/123263/56945/122704/7284/64983/29093/64968/9801/9553/65080/60488/63931/10102/28998/54516/51258/6183/6183/65008/29088/65993/124995/51649/51073/64963/65003/57129/90480/26589/4528/85476/84545/219927/63875/6182/64969/64432/79590/10884/11222/118487/28973/28973/28973/28973/28973/28973/28973/28957/10573/64979/55168/740/54998/116540/51081/54148/5018/64978/84340/51318/54534/64928/6…
SHEDDEN_LUNG_CANCER_POOR_SURVIVAL_A6	SHEDDEN_LUNG_CANCER_POOR_SURVIVAL_A6	455	0.418136	1.66774	2.141e-08	2.31192e-06	1.89349e-06	7348	tags=40%, list=20%, signal=33%	5315/10874/5836/30001/4282/4282/54520/205/55165/5214/2161/81539/80758/3099/7004/79814/6566/6566/54913/2820/51002/5817/54457/79071/8936/7321/10452/6549/10484/55726/79035/57045/3925/7334/2597/11165/5496/3945/1029/5230/2773/993/22929/3276/4664/4001/5690/8577/10492/10197/970/93081/9221/9801/5481/9775/10767/1138/10652/54442/4175/4830/55257/5898/55110/6628/9391/6627/3066/23788/23788/10856/55326/55326/1…
KEGG_SPLICEOSOME	KEGG_SPLICEOSOME	126	0.592645	2.06326	2.43204e-08	2.58168e-06	2.11442e-06	7426	tags=54%, list=21%, signal=43%	7919/7919/7919/7919/7919/7919/7919/7919/56259/7919/7919/7919/7919/7919/7919/7919/7919/8683/6635/6632/4116/10946/4670/9128/6629/3305/3305/3305/3305/3305/11338/9775/10189/3192/22916/3183/27339/51690/55110/6628/6627/6426/6426/6636/3305/3305/3305/3305/3305/84844/51691/1665/26121/26121/26121/26121/26121/26121/26121/26121/26121/26121/84950/51340/8449/8449/8449/8449/8449/8449/8449/8449/8449/8449/8449/84…
MOOTHA_MITOCHONDRIA	MOOTHA_MITOCHONDRIA	447	0.418033	1.66814	3.07166e-08	3.2063e-06	2.626e-06	7638	tags=42%, list=21%, signal=33%	622/622/1535/54948/7409/23597/79085/27018/205/8659/217/4718/81034/6770/51116/4214/2820/79751/51067/56652/10452/8604/80777/56945/29883/7284/27336/1201/1201/23600/53615/1854/10440/5834/2806/1892/4708/7019/9158/708/2746/29093/578/1890/522/23417/518/4285/9801/9553/317/27349/2230/10953/5580/2271/3033/596/211/64216/65080/60488/84172/2395/4717/5464/638/594/63931/27034/23788/23788/10479/4706/10102/2356/2…
WANG_RESPONSE_TO_GSK3_INHIBITOR_SB216763_DN	WANG_RESPONSE_TO_GSK3_INHIBITOR_SB216763_DN	353	0.443149	1.72003	4.79551e-08	4.92365e-06	4.03253e-06	6825	tags=34%, list=19%, signal=28%	3487/9535/4061/4061/4478/23516/1718/30001/11001/2118/4282/4282/2171/7490/1627/5778/5361/5214/23753/23243/83605/28231/79077/7078/6566/6566/2710/84908/6924/7903/23180/9781/60673/7372/6941/6941/6941/6941/6941/6941/6941/11164/27440/4145/3157/3693/56652/51491/7374/3925/51678/10113/993/2551/90861/84259/7019/54931/26017/93081/139886/7430/10189/55011/27349/39/171568/6533/10682/8208/64216/50628/9002/4175/…
ZHENG_BOUND_BY_FOXP3	ZHENG_BOUND_BY_FOXP3	490	0.409078	1.62963	5.7097e-08	5.76772e-06	4.72383e-06	6699	tags=35%, list=19%, signal=29%	301/22807/3936/84456/30011/9840/7114/64092/3709/10659/28951/6711/7048/10365/23499/7456/5294/51338/7155/5788/5788/5788/5788/55081/23258/399/23329/92241/23243/84912/25939/55612/55843/5588/54331/9844/4249/8835/969/4214/26191/7903/120/9882/54491/259230/2820/81552/3588/1102/10447/1997/84959/1316/5987/5987/5987/5987/5987/5987/5987/200132/84937/159/10892/558/8202/80342/22800/79720/22884/2004/79596/8204/…
WP_MRNA_PROCESSING	WP_MRNA_PROCESSING	126	0.582654	2.02848	6.40182e-08	6.36423e-06	5.21238e-06	8276	tags=76%, list=23%, signal=59%	10659/10421/8683/3188/6635/6632/3181/5496/11218/6638/6733/10236/10236/10946/4670/9128/6629/3276/11338/1660/3275/22803/3192/3191/3191/10978/22916/3183/51692/51690/6628/6627/6426/6426/6829/6636/1478/84844/1665/8449/8449/8449/8449/8449/8449/8449/8449/10972/8449/8449/8449/8449/8449/8449/8449/8449/8449/8449/8449/8449/8449/8449/8449/8449/4809/23450/24148/8106/3184/8449/8449/8449/8449/8449/8449/8449/844…
YAO_TEMPORAL_RESPONSE_TO_PROGESTERONE_CLUSTER_14	YAO_TEMPORAL_RESPONSE_TO_PROGESTERONE_CLUSTER_14	143	0.551109	1.96513	7.76899e-08	7.60268e-06	6.22669e-06	7208	tags=55%, list=20%, signal=44%	5315/56950/130589/2923/9601/7163/9761/79077/396/8099/7414/26003/5954/51491/3654/64841/7334/435/54888/3276/10492/55847/10430/10652/51303/122060/10952/79711/79711/4830/5917/5464/6627/6426/6426/56005/6184/56061/57222/5550/7064/10969/55651/221545/221545/221545/221545/221545/221545/221545/6597/23481/7203/5902/6746/54815/27000/3714/23173/7922/7922/7922/7922/7922/7922/7922/7922/7922/7922/7922/7922/7922/…
NAKAMURA_TUMOR_ZONE_PERIPHERAL_VS_CENTRAL_UP	NAKAMURA_TUMOR_ZONE_PERIPHERAL_VS_CENTRAL_UP	275	0.476971	1.81595	8.00742e-08	7.71546e-06	6.31906e-06	6613	tags=37%, list=18%, signal=30%	4257/4038/347902/401115/123920/23597/132299/10220/55165/4168/54733/8682/55612/112616/4131/55352/79077/440574/51523/27130/4199/6659/51022/11164/1462/51002/7414/26227/51232/51232/3693/23370/3654/79833/7334/558/9590/116496/7332/55969/64146/5690/131076/29093/10492/84516/10197/10468/5684/26579/9801/10962/7430/54865/5889/2271/5721/5721/8677/4830/8091/3416/5245/51371/1965/5685/10969/390/26147/858/5717/3…
KARLSSON_TGFB1_TARGETS_UP	KARLSSON_TGFB1_TARGETS_UP	122	0.575487	1.99504	8.51271e-08	8.07805e-06	6.61602e-06	6799	tags=55%, list=19%, signal=45%	7171/87/4478/7791/7791/7076/58527/2653/51199/79084/4323/586/26227/10200/1316/3837/79833/23333/54888/51330/4691/10492/6418/9221/9188/8091/5464/51154/1965/23560/8883/1984/1984/1104/5550/302/6723/9532/7203/8662/7347/55646/3419/1737/9100/51388/26354/27101/26156/84549/1107/1981/10096/3336/6950/9868/10514/10694/84107/84128/51096/23082/9933/2098/10576/51389/10808/79811/6059
PEREZ_TP63_TARGETS	PEREZ_TP63_TARGETS	345	-0.465965	-1.72038	1.36218e-07	1.27333e-05	1.04287e-05	6434	tags=42%, list=18%, signal=35%	10235/3757/6376/23493/121551/7920/7920/7920/7920/7920/7920/7920/3957/80055/9659/1944/10570/116362/9284/9284/1412/3304/3304/3304/3304/3304/23452/4092/8817/4093/64116/30811/57616/80223/360/57822/25861/10724/3303/3303/3303/3303/3303/23224/6482/7920/7920/7920/7920/7920/7920/7920/9022/56241/22861/6867/11189/5624/9744/9744/116113/5833/1995/2258/5017/9727/9727/1152/2049/5979/9473/54855/79755/3303/3303/3…
MONNIER_POSTRADIATION_TUMOR_ESCAPE_UP	MONNIER_POSTRADIATION_TUMOR_ESCAPE_UP	399	0.424543	1.66666	1.38547e-07	1.27606e-05	1.04511e-05	4805	tags=28%, list=13%, signal=24%	9173/10227/231/6711/9277/9277/9277/9277/9277/311/54520/9057/2889/9647/644815/6645/6645/81034/9306/10269/84912/9761/11021/25800/6645/6645/1728/57099/8099/9791/8645/9397/1462/2120/586/79892/122616/51107/56919/116225/55726/80317/22984/3837/112495/6046/6046/6046/6046/6046/6046/6046/4794/65108/1611/11196/51605/55170/9277/9277/9277/9277/9277/9277/9277/9277/9277/9277/80150/10493/8061/6415/1108/11171/109…
GRYDER_PAX3FOXO1_TOP_ENHANCERS	GRYDER_PAX3FOXO1_TOP_ENHANCERS	441	0.411499	1.64389	1.6162e-07	1.467e-05	1.20149e-05	6920	tags=38%, list=19%, signal=31%	26060/9223/9223/81553/10659/71/3566/57580/4282/4282/79754/56259/54332/2889/4232/60/81539/5092/79180/57134/1612/57460/1465/2139/57190/2137/23433/10109/9844/4853/140766/84908/8099/5937/6659/10487/27440/92797/23076/5037/80854/142/23619/1650/50512/5954/80775/92675/4074/9741/64429/10946/2739/57720/473/8872/27309/56270/90627/55277/2590/29101/842/55832/23328/9221/9697/23189/5889/9685/596/22856/51643/291…
WELCH_GATA1_TARGETS	WELCH_GATA1_TARGETS	25	-0.852834	-2.14689	1.89248e-07	1.69323e-05	1.38677e-05	4033	tags=77%, list=11%, signal=68%	4097/10661/286/23456/7389/2040/571/161882/3046/3145/7390/5498/210/3043/2993/2039/212/3040/3050/6521
MORI_EMU_MYC_LYMPHOMA_BY_ONSET_TIME_UP	MORI_EMU_MYC_LYMPHOMA_BY_ONSET_TIME_UP	110	0.575431	1.96868	3.27472e-07	2.88867e-05	2.36586e-05	6705	tags=52%, list=19%, signal=43%	7188/28951/59339/55333/3965/89958/642/586/400916/400916/79071/126299/4602/219743/10951/9590/22929/11338/55847/64112/64112/55172/10743/84733/2287/6628/10000/10000/25929/10643/1979/6597/6749/5902/283899/2079/91442/51639/11157/11108/9377/54962/58509/6598/6598/3996/3996/4522/494115/6603/6470/6470/55627/9618/55750/55750/55750/55750/79172/23512/55168/51202/9343
MATSUDA_NATURAL_KILLER_DIFFERENTIATION	MATSUDA_NATURAL_KILLER_DIFFERENTIATION	479	0.396935	1.58432	3.58743e-07	3.12056e-05	2.55578e-05	6031	tags=28%, list=17%, signal=24%	301/3487/9516/5315/8519/79026/9223/9223/2316/5169/54843/10581/7456/53346/56259/2821/2821/51338/7525/4925/60/84293/113189/23258/23400/2149/8323/100528030/9249/220323/11328/1465/8835/84303/2669/9049/26191/80774/6659/259230/5325/4145/1102/5817/26227/51232/51232/359845/359845/1992/57679/1316/80777/23095/3925/80014/2280/65108/47/84058/3945/84302/5211/100526664/1108/84102/3276/4691/196/55210/10492/1829…
CHYLA_CBFA2T3_TARGETS_UP	CHYLA_CBFA2T3_TARGETS_UP	385	0.415227	1.63324	3.77928e-07	3.24242e-05	2.65558e-05	3529	tags=14%, list=10%, signal=13%	3248/400668/946/397/9452/4689/4689/3936/7171/9535/7805/6282/8530/10659/6711/288/9454/55013/53346/9641/2171/59339/5899/5480/8573/9057/7132/4258/23400/2149/134265/143458/6688/5553/84912/57134/5588/23433/28231/59338/8835/51523/9926/5223/29967/1075/340061/340061/6709/613/26996/1992/51101/84959/375449/84329/84343/79890/3945/10493/57504/81622/9563/51330/3292/9498/4242/9886/51303/211/9002/143888/3212/21…
PICCALUGA_ANGIOIMMUNOBLASTIC_LYMPHOMA_DN	PICCALUGA_ANGIOIMMUNOBLASTIC_LYMPHOMA_DN	130	-0.56184	-1.89709	5.02809e-07	4.25553e-05	3.48533e-05	7344	tags=52%, list=20%, signal=41%	204851/56255/51696/65117/23387/6651/262/26994/11320/83591/6430/7803/7803/5252/5252/5252/2625/196441/90637/55818/84919/79441/8013/64061/63935/374/133746/55422/3423/7844/3725/10140/1390/595101/29116/7280/55294/2355/1326/1195/7763/9819/4063/58476/57018/10209/51430/23135/4929/5144/57162/51646/5366/8660/28984/51278/923/5187/9314/23645/7071/1647/3475/694/7779/7538/23710/5997/4616/1831/2354
REACTOME_APOPTOSIS	REACTOME_APOPTOSIS	178	0.501672	1.81102	6.08268e-07	5.07945e-05	4.16013e-05	5144	tags=55%, list=14%, signal=48%	7431/26060/5698/5698/5698/5698/5698/5698/5698/5698/5698/5698/5698/5698/5698/5698/5698/5698/5698/5698/5698/5698/5698/5698/5698/5698/5339/5698/5698/5698/5698/5698/5698/5698/5698/5698/5698/5698/5698/5698/5698/5698/5698/1612/5588/7529/57099/5696/5696/5696/5696/5696/5696/5696/5696/9500/353376/28988/840/6709/207/3837/5062/51765/1029/8772/5696/5696/5696/5696/5696/5696/5696/5696/5696/5696/5696/5696/5696/…
WELCSH_BRCA1_TARGETS_UP	WELCSH_BRCA1_TARGETS_UP	197	0.494633	1.81372	6.3144e-07	5.20356e-05	4.26178e-05	7366	tags=41%, list=21%, signal=33%	301/1535/203068/203068/203068/203068/203068/203068/203068/203068/4240/8826/10473/5480/5092/2135/307/120/382/4218/10959/5935/9338/10627/1992/22920/10484/1650/23471/7552/5770/159/567/567/9375/9/2782/10857/5573/8540/4277/4277/4277/4277/4277/4277/4277/4277/10440/8209/7879/3074/5825/3988/961/5867/5604/10548/10548/5090/214/3309/5537/6197/302/3065/1212/9324/10972/901/3987/10574/203068/203068/203068/2030…
REACTOME_PROGRAMMED_CELL_DEATH	REACTOME_PROGRAMMED_CELL_DEATH	207	0.487444	1.80501	6.60781e-07	5.37464e-05	4.40189e-05	4994	tags=44%, list=14%, signal=38%	7431/26060/837/5698/5698/5698/5698/5698/5698/5698/5698/5698/5698/5698/5698/5698/5698/5698/5698/5698/5698/5698/5698/5698/5698/5698/5698/5339/92421/5698/5698/5698/5698/5698/5698/5698/5698/5698/5698/5698/5698/5698/5698/5698/5698/1612/5588/7529/57099/5696/5696/5696/5696/5696/5696/5696/5696/9500/353376/28988/840/6709/207/3837/5062/51765/1029/91782/8772/5696/5696/5696/5696/5696/5696/5696/5696/5696/5696…
QI_PLASMACYTOMA_UP	QI_PLASMACYTOMA_UP	251	0.463004	1.73556	7.88216e-07	6.32897e-05	5.1835e-05	2793	tags=25%, list=8%, signal=24%	397/822/3936/26228/7114/8530/7791/7791/7409/3566/3059/837/9168/5216/5777/3561/311/63940/63940/63940/63940/63940/63940/63940/2769/5698/5698/5698/5698/5698/5698/5698/5698/27040/5698/5698/5698/5698/5698/5698/5698/5698/5698/5698/5698/5698/5698/5698/5698/5698/5339/23616/5698/5698/5698/5698/5698/5698/5698/5698/5698/5698/5698/5698/5698/5698/5698/5698/79874/3815/3732/9948/1265/5696/5696/5696/5696/5696/56…
REACTOME_HOST_INTERACTIONS_OF_HIV_FACTORS	REACTOME_HOST_INTERACTIONS_OF_HIV_FACTORS	130	0.540882	1.88951	8.23649e-07	6.36854e-05	5.21591e-05	5096	tags=52%, list=14%, signal=45%	1794/1174/8905/5698/5698/5698/5698/5698/5698/5698/5698/5698/5698/5698/5698/5698/5698/5698/5698/5698/5698/5698/5698/5698/5698/5698/5698/5698/5698/5698/5698/5698/5698/5698/5698/5698/5698/5698/5698/5698/5698/5698/5698/9844/5696/5696/5696/5696/5696/5696/5696/5696/8907/55690/55706/3837/5062/567/567/4869/5696/5696/5696/5696/5696/5696/5696/5696/5696/5696/5696/5696/5696/5696/5696/5696/5696/5696/5696/5696…
OISHI_CHOLANGIOMA_STEM_CELL_LIKE_UP	OISHI_CHOLANGIOMA_STEM_CELL_LIKE_UP	340	0.424076	1.63814	8.14968e-07	6.36854e-05	5.21591e-05	5576	tags=31%, list=16%, signal=27%	55819/80023/7568/7726/7726/7726/7726/7726/7726/7726/7726/1429/79085/1954/7693/57645/81539/5092/22954/4771/80345/9926/10919/10919/10919/10919/10919/10919/10919/171546/26227/51361/22920/142/6635/25909/23598/10919/10919/10919/10919/10919/10919/10919/10919/10919/10919/10919/10919/10919/10919/8195/8195/8195/55520/6638/6733/7711/7673/10440/5435/11135/54811/4708/5664/1122/1660/5867/55699/23189/5090/7753…
TOYOTA_TARGETS_OF_MIR34B_AND_MIR34C	TOYOTA_TARGETS_OF_MIR34B_AND_MIR34C	439	0.404532	1.61513	8.20946e-07	6.36854e-05	5.21591e-05	5886	tags=33%, list=16%, signal=28%	4061/4061/203068/203068/203068/203068/203068/203068/203068/203068/10473/7919/7919/7919/7919/7919/7919/7919/7919/113540/5019/54520/3939/3939/55711/140707/57645/149175/84912/1729/157/145773/7919/7919/7919/7919/7919/7919/7919/7919/51280/396/55706/6941/6941/6941/6941/6941/6941/6941/81552/26227/79073/54537/51361/10452/51107/4602/54947/116225/3837/7374/4074/83879/4793/4793/4298/51427/283989/10007/19725…
REACTOME_DOWNSTREAM_SIGNALING_EVENTS_OF_B_CELL_RECEPTOR_BCR	REACTOME_DOWNSTREAM_SIGNALING_EVENTS_OF_B_CELL_RECEPTOR_BCR	80	0.615579	1.99107	8.47078e-07	6.46981e-05	5.29886e-05	4991	tags=67%, list=14%, signal=58%	5579/5698/5698/5698/5698/5698/5698/5698/5698/5698/5698/5698/5698/5698/5698/5698/5698/5698/5698/5698/5698/5698/5698/5698/5698/5698/5698/5698/5698/5698/5698/5698/5698/5698/5698/5698/5698/5698/5698/5698/5698/5696/5696/5696/5696/5696/5696/5696/5696/5530/801/8454/4790/4794/10892/2280/4793/4793/5696/5696/5696/5696/5696/5696/5696/5696/5696/5696/5696/5696/5696/5696/5696/5696/5696/5696/5696/5696/5696/5696…
REACTOME_SIGNALING_BY_THE_B_CELL_RECEPTOR_BCR	REACTOME_SIGNALING_BY_THE_B_CELL_RECEPTOR_BCR	160	0.512775	1.82575	8.60466e-07	6.49289e-05	5.31776e-05	5104	tags=53%, list=14%, signal=46%	28797/5579/30011/3709/7409/4067/5777/5698/5698/5698/5698/5698/5698/5698/5698/5698/5698/5698/5698/5698/5698/5698/5698/5698/5698/5698/5698/5698/5698/5698/5698/28815/5698/5698/5698/5698/5698/5698/5698/5698/5698/5698/5698/5698/5698/5698/5698/5698/5696/5696/5696/5696/5696/5696/5696/5696/5530/801/8454/4790/4794/10892/2280/4793/4793/2885/5696/5696/5696/5696/5696/5696/5696/5696/5696/5696/5696/5696/5696/5…
SCHUHMACHER_MYC_TARGETS_UP	SCHUHMACHER_MYC_TARGETS_UP	79	0.62057	1.99762	9.02774e-07	6.73104e-05	5.5128e-05	9374	tags=73%, list=26%, signal=54%	4257/4744/23516/2171/205/3939/3939/4232/2653/25800/6566/6566/1075/10549/23076/5037/7371/23171/8187/9221/9188/4830/2395/2926/1104/6723/10969/56902/5902/2194/7347/23404/10131/3336/10153/4522/10606/5425/10607/11222/23246/23246/5437/7965/10135/9933/23212/5634/7407/7407/7407/7407/7407/7407/7407/7407/7407/7407/7407/7407/7407/7407/483/6059/10244/7407/7407/7407/7407/7407/7407/7407/1595/54205/8165/790/495…
HAHTOLA_MYCOSIS_FUNGOIDES_SKIN_UP	HAHTOLA_MYCOSIS_FUNGOIDES_SKIN_UP	174	0.508333	1.83557	9.40425e-07	6.92927e-05	5.67516e-05	5478	tags=15%, list=15%, signal=13%	27306/9452/6526/28978/9535/1512/2316/1043/5216/311/2821/2821/8573/9638/7132/23258/9601/6611/1266/5479/3916/23474/5584/6659/6709/1102/8683/51232/51232/801/79833/2782/29995/11137/832/51192/30844/2746/3708/2078/1994/3192/11198/65264/29922/6184/7534/30968/90410/6746/2079/64764/3842/81688/6304/9140/10465/1487/7570/3486/4702/9270/10776/6925/54470/5033/10552/58533/403
ELVIDGE_HYPOXIA_DN	ELVIDGE_HYPOXIA_DN	147	0.534409	1.90112	9.94876e-07	7.24524e-05	5.93394e-05	8041	tags=58%, list=22%, signal=46%	6809/3087/57175/8659/9057/23753/10269/10093/11021/55343/8835/79084/396/2992/54913/801/79697/2063/11196/2746/3308/55161/578/5664/84516/10197/56926/11151/1534/3416/55379/6426/6426/64222/9261/1984/1984/9673/6723/54512/56902/63916/81831/6183/6183/3419/51388/51728/25966/56993/1050/80324/79080/9410/8884/57419/9816/55105/2873/29919/10237/10963/80308/6272/6674/23246/23246/25855/79581/79581/54505/246243/1…
BURTON_ADIPOGENESIS_PEAK_AT_2HR	BURTON_ADIPOGENESIS_PEAK_AT_2HR	46	-0.721403	-2.07066	1.09515e-06	7.88384e-05	6.45696e-05	3088	tags=61%, list=9%, signal=56%	8870/8870/8870/8870/8870/8870/11080/7057/3726/54206/4929/5606/3399/3399/388/2353/133/9314/23645/3491/8870/8870/8870/8870/8870/8870/8870/8870/8870/8870/8870/8870/8870/8870/8870/8870/8870/8870/8870/8870/8870/8870/8870/8870/7538/5997/1843/7832/2354/10912
YAGI_AML_WITH_T_8_21_TRANSLOCATION	YAGI_AML_WITH_T_8_21_TRANSLOCATION	367	0.416981	1.62306	1.20658e-06	8.58727e-05	7.03308e-05	7778	tags=18%, list=22%, signal=14%	7177/27306/2206/822/3936/7805/11120/3561/23499/4681/9641/5899/205/3956/7132/109/2589/4065/10555/1675/1675/23243/26037/5355/22883/3815/1445/9844/29/29/29/23075/23474/7317/5325/9466/9466/81552/613/2120/5037/166/10099/11046/11046/5954/4790/253782/10493/2739/7915/10758/51097/595/2590/7110/51100/3708/11338/6275/5867/4363/4363/7436/9553/5580/9685/1652/1652/1652/2744/7353/7360/1312/22978/5335/53/9459/48…
REACTOME_ANTIGEN_PROCESSING_CROSS_PRESENTATION	REACTOME_ANTIGEN_PROCESSING_CROSS_PRESENTATION	105	0.573187	1.94474	1.36157e-06	9.58151e-05	7.84737e-05	6031	tags=50%, list=17%, signal=42%	4689/4689/1520/1535/5698/5698/5698/5698/5698/5698/5698/5698/5698/5698/5698/5698/5698/5698/5698/5698/5698/5698/5698/5698/5698/5698/5698/5698/2923/5698/5698/5698/5698/5698/5698/5698/5698/5698/5698/5698/5698/5698/5698/5698/5698/3133/3133/3133/3133/3133/3133/3133/3133/3133/3133/3133/3133/3133/3133/3133/3133/3133/3133/3133/3133/3133/3133/3133/3133/3133/3133/3133/3133/6890/6890/6890/6890/6890/6890/6890…
MULLIGHAN_MLL_SIGNATURE_2_DN	MULLIGHAN_MLL_SIGNATURE_2_DN	274	0.447073	1.70032	1.53554e-06	0.000106856	8.75167e-05	5565	tags=29%, list=16%, signal=25%	3248/27306/9452/8519/26228/284119/56950/3576/51162/10473/7048/23499/4681/1627/7525/54360/2589/10319/399/7798/55784/9249/6326/26037/7163/1612/5588/7004/57048/57048/9844/4249/56521/51116/6776/7324/613/586/10451/8936/10384/22920/375449/56945/4869/9653/3895/51144/56954/10492/9557/54682/54682/9392/2744/51227/79603/3685/9026/23141/10565/5610/6832/9351/23484/54881/27032/351/10657/10954/8766/6678/29789/5…
ICHIBA_GRAFT_VERSUS_HOST_DISEASE_35D_UP	ICHIBA_GRAFT_VERSUS_HOST_DISEASE_35D_UP	143	0.520447	1.8558	1.69391e-06	0.000116582	9.54819e-05	3602	tags=19%, list=10%, signal=18%	9516/5315/4689/4689/1520/6809/1043/7805/6282/7114/1535/9168/8826/28638/5698/5698/5698/5698/5698/5698/5698/5698/51338/5788/5788/5788/5788/5698/5698/5698/5698/5698/5698/5698/5698/5698/5698/5698/5698/5698/5698/5698/5698/1192/1192/1192/1192/1192/1192/1192/1192/1192/1192/1192/1192/1192/1192/1192/1192/1192/1192/1192/1192/1192/1192/1192/1192/1192/1192/1192/1192/1192/1192/1192/1192/1192/1192/1192/1192/11…
TONKS_TARGETS_OF_RUNX1_RUNX1T1_FUSION_MONOCYTE_UP	TONKS_TARGETS_OF_RUNX1_RUNX1T1_FUSION_MONOCYTE_UP	201	0.475702	1.74955	1.89267e-06	0.000128845	0.000105526	5444	tags=41%, list=15%, signal=35%	27306/6526/4744/284119/4061/4061/1435/55353/2317/9454/5214/2653/9456/9636/28231/6566/6566/7205/84908/3965/6659/6709/24147/51465/79876/7374/2063/10539/3384/4869/8872/11137/348/8570/1892/708/55686/23328/55172/56926/9221/9886/4830/60488/3434/6627/3309/8602/813/23560/4706/10969/55651/6597/23481/204/8662/7138/54815/81892/3987/3842/7922/7922/7922/7922/7922/7922/1737/4191/7922/7922/7922/7922/7922/7922/7…
VECCHI_GASTRIC_CANCER_EARLY_UP	VECCHI_GASTRIC_CANCER_EARLY_UP	417	0.397841	1.57082	1.937e-06	0.000130446	0.000106837	7149	tags=37%, list=20%, signal=30%	3976/10874/389432/1520/8519/6282/3576/126375/55353/10581/2023/55165/55711/5214/6281/2161/286077/286077/5092/10093/55612/9636/79084/5696/5696/5696/5696/5696/5696/5696/5696/56667/10675/6709/4241/4602/27166/6632/51491/136/92799/83879/10072/84883/51605/4869/138428/10857/8061/5696/5696/5696/5696/5696/5696/5696/5696/5696/5696/5696/5696/5696/5696/5696/5696/5696/5696/5696/5696/5696/5696/5696/5696/5696/56…
CHYLA_CBFA2T3_TARGETS_DN	CHYLA_CBFA2T3_TARGETS_DN	239	-0.487728	-1.75517	2.22102e-06	0.000145732	0.000119356	3385	tags=37%, list=9%, signal=34%	10107/10107/10107/10107/10107/10107/10107/10107/10107/10107/10107/10107/10107/10107/10107/10107/9258/9258/7486/50865/2765/123283/54716/1364/286/115557/4774/140685/185/23321/200942/4059/3321/66008/6560/64129/63027/148534/79628/57125/6843/64122/148398/440/220972/220972/388581/64714/3665/3665/3934/440603/4057/677/5414/83667/83667/151176/85462/4259/58472/9796/8974/10422/10107/10107/10107/10107/10107/…
VERHAAK_GLIOBLASTOMA_MESENCHYMAL	VERHAAK_GLIOBLASTOMA_MESENCHYMAL	216	0.466581	1.73786	2.2338e-06	0.000145732	0.000119356	2311	tags=34%, list=6%, signal=32%	301/2650/4689/4689/3936/752/284119/7805/6282/55/3566/837/5836/8826/7076/5777/7048/55013/7456/53827/2769/51338/3956/5788/5788/5788/5788/3385/7132/10095/4258/4065/1192/1192/1192/1192/1192/1192/1192/1192/1192/1192/1192/1192/1192/1192/1192/1192/1192/1192/1192/1192/1192/1192/1192/1192/1192/1192/1192/1192/1192/1192/1192/1192/1192/1192/1192/1192/1192/1192/1192/1192/1192/1192/3937/5328/307/1265/26191/593…
BLANCO_MELO_COVID19_SARS_COV_2_INFECTION_A594_ACE2_EXPRESSING_CELLS_RUXOLITINIB_UP	BLANCO_MELO_COVID19_SARS_COV_2_INFECTION_A594_ACE2_EXPRESSING_CELLS_RUXOLITINIB_UP	416	-0.424133	-1.58593	2.19773e-06	0.000145732	0.000119356	3630	tags=27%, list=10%, signal=25%	23099/84932/3097/3725/60494/5016/200424/10620/2824/83694/4804/55294/905/4050/4050/4050/4050/4050/4050/4050/4050/330/8870/8870/8870/8870/8870/8870/1106/26959/26959/55904/9852/83452/8462/57018/203102/203102/29841/8349/89797/25841/162979/23253/5514/5514/5514/5514/5514/5514/5514/5514/5514/5514/5514/5514/5514/5514/5514/5514/5514/5514/5514/5514/5514/5514/5514/5514/5514/5514/5514/5514/5514/5514/5514/551…
REACTOME_HIV_LIFE_CYCLE	REACTOME_HIV_LIFE_CYCLE	148	0.526923	1.87382	2.28547e-06	0.00014606	0.000119625	7984	tags=56%, list=22%, signal=44%	92421/1022/1022/2968/2968/2968/2968/2968/2968/6924/9397/55706/54457/2068/79720/91782/5435/128866/5436/51652/2958/7520/25978/2965/2965/22916/11198/51534/23636/6829/5431/1104/2237/9883/6749/5902/9150/9150/2547/8178/7852/25920/5478/6827/7175/5434/9631/4686/23279/9525/6877/10762/5903/2961/5433/7518/8480/2968/2968/2968/2968/2968/2968/2968/2968/2968/2968/2968/2968/5432/5901/404672/7469/10015/2968/2968/…
GARCIA_TARGETS_OF_FLI1_AND_DAX1_DN	GARCIA_TARGETS_OF_FLI1_AND_DAX1_DN	161	0.503927	1.79793	2.26598e-06	0.00014606	0.000119625	7196	tags=50%, list=20%, signal=40%	389432/4744/144097/6941/6941/6941/6941/6941/6941/6941/51002/57415/60436/3682/23299/56919/27166/8726/80777/29883/221830/51605/4869/55661/993/1854/4001/10199/9221/51559/5757/8562/8208/84733/2395/84842/9894/25929/11091/1104/11130/2237/91893/83549/5688/10632/51287/114034/3842/6941/6941/6941/6941/6941/6941/6941/6941/6941/6941/6941/6941/6941/6941/54962/5434/3015/9136/26156/23587/23587/79719/65003/22919…
REACTOME_GENE_AND_PROTEIN_EXPRESSION_BY_JAK_STAT_SIGNALING_AFTER_INTERLEUKIN_12_STIMULATION	REACTOME_GENE_AND_PROTEIN_EXPRESSION_BY_JAK_STAT_SIGNALING_AFTER_INTERLEUKIN_12_STIMULATION	38	0.739336	2.11301	2.31967e-06	0.000146749	0.000120189	5191	tags=58%, list=14%, signal=50%	3936/4478/4282/4282/1072/1265/9049/9987/3181/5062/5908/4001/5721/5721/5898/6627/3185/302/552900/552900/654483/5478/4507/6950/829
GERY_CEBP_TARGETS	GERY_CEBP_TARGETS	129	-0.554677	-1.87024	2.42051e-06	0.000151597	0.00012416	5874	tags=55%, list=16%, signal=46%	3337/3304/3304/3304/3304/3304/9592/55076/10544/90637/5329/968/3303/3303/3303/3303/3303/171483/2745/4597/51109/59/7498/3303/3303/3303/3303/3303/3304/3304/3304/3304/3304/2765/2643/6274/3304/3304/3304/3304/3304/4047/4047/3726/3303/3303/3303/3303/3303/1839/5274/6236/218/3304/3304/3304/3304/3304/51099/3934/377630/377630/51706/2069/3303/3303/3303/3303/3303/4189/3399/3399/2872/2353/1649/1191/122622/6599…
HALLMARK_ALLOGRAFT_REJECTION	HALLMARK_ALLOGRAFT_REJECTION	199	0.478285	1.75714	2.45047e-06	0.000151953	0.000124452	6167	tags=21%, list=17%, signal=18%	3976/2650/822/4689/4689/1520/5579/2316/1435/3566/5552/3059/7076/4067/5777/3561/3574/5788/5788/5788/5788/2589/4065/2149/6688/7163/3937/92/1445/3133/3133/3133/3133/3133/3133/3133/3133/3133/3133/3133/3133/3133/3133/3133/3133/3133/3133/3133/3133/3133/3133/3133/3133/3133/3133/3133/3133/6890/6890/6890/6890/6890/6890/6890/6890/6891/6891/6891/6891/6891/6891/6891/6891/7903/9466/9466/586/6891/6891/6891/689…
SANSOM_APC_MYC_TARGETS	SANSOM_APC_MYC_TARGETS	238	0.458058	1.71079	2.58884e-06	0.000157417	0.000128926	7529	tags=47%, list=21%, signal=37%	55/1718/4282/4282/5698/5698/5698/5698/5698/5698/5698/5698/140612/3340/5698/5698/5698/5698/5698/5698/5698/5698/5698/5698/5698/5698/5698/5698/5698/5698/644815/29941/2622/5698/5698/5698/5698/5698/5698/5698/5698/5698/5698/5698/5698/5698/5698/5698/5698/9456/81786/6659/89958/112858/26227/118980/116225/1316/84823/29099/84958/51605/54462/595/347734/55218/51330/55611/64689/54841/4221/84890/6533/200081/582…
BLANCO_MELO_MERS_COV_INFECTION_MCR5_CELLS_UP	BLANCO_MELO_MERS_COV_INFECTION_MCR5_CELLS_UP	270	-0.465847	-1.6918	2.56552e-06	0.000157417	0.000128926	6161	tags=52%, list=17%, signal=44%	55359/118491/3674/57530/55138/7148/7148/7148/7148/7148/7148/7148/7148/2625/3337/3304/3304/3304/3304/3304/1160/5923/753/7148/7148/7148/7148/7148/7148/7148/7148/220359/147798/147798/147798/147798/147798/147798/147798/147798/147798/147798/255488/26137/8909/90637/64783/30811/8913/64772/84614/58499/3303/3303/3303/3303/3303/64577/25791/7288/79365/339883/340152/80737/80737/80737/80737/80737/80737/80737/…
NAKAJIMA_MAST_CELL	NAKAJIMA_MAST_CELL	45	0.703648	2.07061	2.64001e-06	0.000158984	0.00013021	1746	tags=35%, list=5%, signal=34%	3248/946/7177/27306/2206/822/284119/2624/28951/7076/4013/5553/3815/4056/4056/5037/10493
REACTOME_FC_EPSILON_RECEPTOR_FCERI_SIGNALING	REACTOME_FC_EPSILON_RECEPTOR_FCERI_SIGNALING	181	0.488555	1.77663	2.84007e-06	0.000169403	0.000138743	5104	tags=52%, list=14%, signal=45%	2206/28797/3709/7409/4067/5698/5698/5698/5698/5698/5698/5698/5698/27040/5698/5698/5698/5698/5698/5698/5698/5698/5698/5698/5698/5698/5698/5698/5698/5698/28815/5698/5698/5698/5698/5698/5698/5698/5698/5698/5698/5698/5698/5698/5698/5698/5698/3937/5588/5696/5696/5696/5696/5696/5696/5696/5696/4214/5530/10451/7321/801/8454/4790/5062/7334/10892/2885/5696/5696/5696/5696/5696/5696/5696/5696/5696/5696/5696/…
PODAR_RESPONSE_TO_ADAPHOSTIN_UP	PODAR_RESPONSE_TO_ADAPHOSTIN_UP	143	-0.542908	-1.8443	3.11691e-06	0.000184162	0.000150831	5874	tags=63%, list=16%, signal=53%	3337/3304/3304/3304/3304/3304/26750/3687/8644/23022/960/833/833/23515/10499/3303/3303/3303/3303/3303/4779/25842/4750/2745/22861/4097/55281/1193/23099/3725/1054/3303/3303/3303/3303/3303/80232/1390/3304/3304/3304/3304/3304/7280/26959/26959/55108/1195/7763/26136/11080/6520/3304/3304/3304/3304/3304/9821/6935/2801/7422/3303/3303/3303/3303/3303/54676/10150/440/3304/3304/3304/3304/3304/1051/9903/571/545…
CREIGHTON_ENDOCRINE_THERAPY_RESISTANCE_4	CREIGHTON_ENDOCRINE_THERAPY_RESISTANCE_4	293	0.429472	1.64856	3.27277e-06	0.000191564	0.000156893	6172	tags=37%, list=17%, signal=31%	3248/387882/6947/8900/2317/11001/205/441168/1836/89846/2161/50861/83464/55352/10419/23433/7105/3241/54898/10919/10919/10919/10919/10919/10919/10919/7903/120/150678/9466/9466/27440/1462/23076/143/79751/4886/4602/3837/23683/10919/10919/10919/10919/10919/10919/10919/10919/10919/10919/10919/10919/10919/10919/57486/8204/8624/10007/1676/8209/5525/22882/3308/84105/140691/140691/51559/91272/596/84733/109…
BHATTACHARYA_EMBRYONIC_STEM_CELL	BHATTACHARYA_EMBRYONIC_STEM_CELL	83	0.608107	1.98236	3.43006e-06	0.000198912	0.000162911	4370	tags=43%, list=12%, signal=38%	4257/8519/51083/203068/203068/203068/203068/203068/203068/203068/203068/2171/6611/6566/6566/79071/3945/4869/22929/3308/6418/1829/55920/55920/5684/9188/3066/6741/6423/813/6636/7138/10459/203068/203068/203068/203068/203068/203068/203068/203068/203068/203068/203068/203068/203068/203068/203068/203068/203068/203068/203068/203068/203068/203068/203068/203068/203068/203068/203068/203068/203068/203068/203…
REACTOME_RESPIRATORY_ELECTRON_TRANSPORT	REACTOME_RESPIRATORY_ELECTRON_TRANSPORT	102	0.557752	1.88293	3.49463e-06	0.000200797	0.000164455	10172	tags=72%, list=28%, signal=52%	4718/51241/55863/4708/6341/4717/79133/4513/4706/51103/4514/4712/51204/10128/4707/6390/7388/29078/4537/51079/7386/4704/9377/1345/51300/51295/1353/27089/10131/91942/7384/285521/4702/55967/4709/1337/1351/4725/4722/4722/6392/4710/4694/6389/4714/1327/54539/4731/4715/1329/6391/54205/4713/4541/55471/137682/4726/116228/4729/4698/4716/29796/4720/4700/4700/4700/4700/4700/4700/4700/4700/4700/4700/4700/4700/…
PASQUALUCCI_LYMPHOMA_BY_GC_STAGE_DN	PASQUALUCCI_LYMPHOMA_BY_GC_STAGE_DN	170	0.490434	1.76478	3.53215e-06	0.000201108	0.00016471	2518	tags=43%, list=7%, signal=40%	397/64005/3936/865/9535/5579/3087/30011/10659/28951/9168/10365/8303/59339/7155/6281/1192/1192/1192/1192/1192/1192/1192/1192/1192/1192/1192/1192/1192/1192/1192/1192/1192/1192/1192/1192/1192/1192/1192/1192/1192/1192/1192/1192/1192/1192/1192/1192/1192/1192/1192/1192/1192/1192/1192/1192/1192/1192/92241/6611/1266/55843/79874/4033/51523/63901/283349/80774/9987/586/400916/400916/1992/7321/951/23370/7989…
SAKAI_CHRONIC_HEPATITIS_VS_LIVER_CANCER_UP	SAKAI_CHRONIC_HEPATITIS_VS_LIVER_CANCER_UP	82	0.596738	1.94442	3.5687e-06	0.000201358	0.000164915	5862	tags=17%, list=16%, signal=15%	1520/837/5788/5788/5788/5788/51022/100272147/9987/7321/10200/1059/8454/7334/10236/10236/4277/4277/4277/4277/4277/4277/4277/4277/7332/842/3708/3308/317/3192/6426/6426/8883/11335/3842/8520/10935/1434/6950/3716/5903/5534/7337/7295/3091/26271/9488/1388/1388/1388/1388
ONDER_CDH1_TARGETS_1_UP	ONDER_CDH1_TARGETS_1_UP	135	-0.538417	-1.82526	3.61959e-06	0.000202406	0.000165773	3877	tags=27%, list=11%, signal=24%	1952/2049/4051/9473/79755/26471/5652/4050/4050/4050/4050/4050/4050/4050/4050/79095/2673/6405/6919/2817/2052/26036/79875/22995/199731/56997/7784/1466/2801/3963/3963/3963/3963/23351/9924/1491/63874/440/687/4189/1397/9975/55062/54800/23363/81558/5187/3600/467/5742/10957/8269/3963/3963/3963/3963/8971/10628/4485/79094/9518/25840/23710/1831/7832/604
REACTOME_RRNA_PROCESSING	REACTOME_RRNA_PROCESSING	199	0.472775	1.7369	3.664e-06	0.000203076	0.000166322	7330	tags=39%, list=20%, signal=31%	9277/9277/9277/9277/9277/54913/10200/22984/1454/3028/9277/9277/9277/9277/9277/9277/9277/9277/9277/9277/25926/10813/4691/84946/29960/51010/54931/10199/22803/55131/5822/9188/22894/26168/84916/84916/81875/60528/25879/8602/55759/88745/9277/9277/9277/9277/9277/10557/79050/79050/10969/55651/54512/54881/56902/23481/81887/11102/55127/4809/55226/10885/9724/9692/9692/23404/54555/54433/55720/57647/116832/51…
REACTOME_RRNA_MODIFICATION_IN_THE_NUCLEUS_AND_CYTOSOL	REACTOME_RRNA_MODIFICATION_IN_THE_NUCLEUS_AND_CYTOSOL	59	0.659096	2.03091	3.79068e-06	0.000206444	0.00016908	6375	tags=65%, list=18%, signal=54%	9277/9277/9277/9277/9277/22984/9277/9277/9277/9277/9277/9277/9277/9277/9277/9277/25926/10813/10199/5822/84916/84916/25879/8602/88745/9277/9277/9277/9277/9277/79050/79050/55651/56902/55127/4809/55226/10885/9724/54555/54433/57647/51118/4839/55813/9136/9790/51602/55272/10528/23160/115939/55505/92856/134430/27341/84128/51096/10607/114049/55623/2091/2091/84135
MOOTHA_HUMAN_MITODB_6_2002	MOOTHA_HUMAN_MITODB_6_2002	429	0.387678	1.53816	3.77944e-06	0.000206444	0.00016908	7596	tags=38%, list=21%, signal=31%	622/622/1535/54948/3059/23597/5019/27018/205/8659/217/4718/2182/6770/51116/2820/10452/8604/80777/56945/29883/7284/27336/1201/1201/1376/23600/53615/1854/10440/2806/1892/4708/7019/9158/2746/29093/3305/3305/3305/3305/3305/578/522/23417/518/54704/4285/9801/5481/9553/317/2230/10953/2271/3033/596/211/65080/2744/60488/2395/4717/6342/594/63931/27034/23788/23788/10479/4706/10102/2356/28998/587/3305/3305/3…
MOREAUX_MULTIPLE_MYELOMA_BY_TACI_DN	MOREAUX_MULTIPLE_MYELOMA_BY_TACI_DN	175	0.495127	1.78482	3.92267e-06	0.000210389	0.000172311	8212	tags=54%, list=23%, signal=42%	55081/81539/2653/54939/6566/6566/285203/79029/11164/6632/55520/84864/9616/152100/7013/10016/408050/408050/9158/708/5684/56926/9801/10194/84916/84916/10856/25929/84233/10969/55120/6597/114971/114971/79982/92609/6742/6742/6742/6742/6183/6183/10632/51079/22948/64431/64794/23658/9782/9782/10480/2146/86/23592/84545/25804/80218/8666/10146/163081/10254/8697/7979/10992/1615/5527/65057/171586/10605/5901/5…
REACTOME_RAC1_GTPASE_CYCLE	REACTOME_RAC1_GTPASE_CYCLE	182	0.481664	1.75154	3.93031e-06	0.000210389	0.000172311	2925	tags=26%, list=8%, signal=24%	397/347902/4689/4689/1794/752/10788/50619/139818/1535/51291/7409/57580/8826/7456/23344/4168/57572/9826/393/23616/55843/396/29/29/29/3071/23526/23075/10810/613/10451/8936/57679/5585/51347/23370/25894/5062/81704/392/3895/11135/7879/55619/27/94134/10652/7410/23348/9459
RICKMAN_METASTASIS_UP	RICKMAN_METASTASIS_UP	339	0.41376	1.59895	4.00402e-06	0.000212519	0.000174055	7601	tags=35%, list=21%, signal=28%	4038/51309/64110/2118/90843/27018/2686/4232/91/9601/56898/92/55486/7105/2669/7158/79921/285989/199953/51067/3693/57679/84275/9486/10778/7552/80095/91151/100505687/8777/10857/57325/6297/56947/57504/51704/51144/4691/10526/7019/619208/51726/55832/56271/10199/283578/378708/25871/10513/80304/65080/60488/100129361/100129361/100129361/100129361/100129361/100129361/7341/5245/81572/55759/1876/80742/80742/…
ALCALA_APOPTOSIS	ALCALA_APOPTOSIS	87	0.58202	1.91348	4.28284e-06	0.000220529	0.000180616	7362	tags=51%, list=21%, signal=40%	64092/837/100506144/5899/2821/2821/5214/399/83464/7416/2242/4145/2597/3150/80342/91782/51097/56947/10440/79022/4236/5880/23788/23788/587/10067/10067/10067/10067/3105/3105/3105/3105/3105/3105/3105/3105/10632/23173/22948/3105/3105/3105/3105/3105/3105/3105/3105/4436/387/10153/3105/3105/3105/3105/3105/3105/3105/3105/310/972/665/506/11035/11035/3312/8189/9907/2011/23165/581/54926/1327/834/10313/7514/9…
OUELLET_OVARIAN_CANCER_INVASIVE_VS_LMP_UP	OUELLET_OVARIAN_CANCER_INVASIVE_VS_LMP_UP	117	0.544931	1.87432	4.22983e-06	0.000220529	0.000180616	7803	tags=58%, list=22%, signal=45%	822/7171/2821/2821/3939/3939/4232/5584/7317/8683/142/8813/10951/567/567/3150/2739/4670/6629/5690/961/5684/5604/5580/2271/3192/7341/3434/9789/7534/10128/6390/8720/5902/1460/1460/1460/1460/1460/1460/1460/9324/10972/5683/3184/10212/57215/3015/23167/10437/22919/1434/7705/1460/1460/1460/1460/1460/1460/1460/79572/4190/506/1460/1460/1460/1460/1460/1460/1460/1337/22913/10237/9276/9833/11222/6745/509/7336…
YAGI_AML_WITH_11Q23_REARRANGED	YAGI_AML_WITH_11Q23_REARRANGED	342	0.411256	1.59247	4.29579e-06	0.000220529	0.000180616	2123	tags=16%, list=6%, signal=15%	8111/55187/23101/6295/6295/9811/9811/8481/7106/1135/25780/7936/7936/7936/7936/7936/7936/1579/8027/974/10402/24142/481/2995/3718/6001/6886/6899/8131/2678/2678/9374/9374/9374/9374/9374/9374/9374/9374/206358/11156/11156/2823/9374/9374/9374/9374/9374/9374/9374/9374/9374/9374/9374/9374/9374/9374/9374/9374/9374/9374/9374/9374/9374/9374/9374/9374/9374/9374/9374/9374/9374/9374/9374/9374/284439/9374/9374/…
RUTELLA_RESPONSE_TO_HGF_UP	RUTELLA_RESPONSE_TO_HGF_UP	417	0.391929	1.54748	4.26902e-06	0.000220529	0.000180616	5650	tags=28%, list=16%, signal=24%	9516/6526/8611/1718/231/4013/1429/53346/51186/11326/2760/5361/23216/4065/23682/9765/6611/157/93349/1465/3099/23433/1728/9019/51063/6924/9683/3916/23180/8879/9882/4199/259230/2820/26175/26175/54662/53905/4145/975/719/57415/586/5817/51232/51232/8804/48/10384/2629/2629/967/2717/10099/8726/10087/253782/8202/54462/8832/10493/116496/9/8624/348/51097/22929/54502/595/2806/79155/3074/1798/56954/3708/5664/…
SANSOM_APC_TARGETS_REQUIRE_MYC	SANSOM_APC_TARGETS_REQUIRE_MYC	223	0.44857	1.67739	4.41984e-06	0.000225053	0.000184321	7811	tags=49%, list=22%, signal=39%	728489/8323/2622/9456/79874/10755/6659/79691/89958/112858/114804/26227/692312/116225/84823/64841/84958/84058/53615/347734/51330/10585/64689/54841/55920/55920/55915/9221/25885/4830/4172/79663/121642/89891/9894/25929/6837/6837/6636/6599/7064/6723/55651/114112/29844/29844/29844/29844/29844/29844/29844/29844/29844/29844/3995/57176/57176/57176/57176/57176/57176/83743/1819/3104/10574/54555/54433/55695/…
LIU_SOX4_TARGETS_DN	LIU_SOX4_TARGETS_DN	308	0.418227	1.60989	4.60611e-06	0.000232646	0.00019054	7067	tags=45%, list=20%, signal=36%	1622/23061/23061/2023/2821/2821/3939/3939/286077/286077/79047/537/2622/7163/873/79029/116986/55706/3705/3705/10959/89958/2120/4241/23299/8525/5585/6838/6838/51465/80777/150223/81542/81926/81537/81537/4116/23203/23600/8624/5211/6595/1676/51292/51292/3276/6856/1052/7110/9774/10197/1660/10094/51406/4221/9221/340481/26135/7917/7917/7917/7917/7917/7917/7917/3192/1652/1652/1652/22894/6426/6426/6184/857…
DANG_MYC_TARGETS_UP	DANG_MYC_TARGETS_UP	128	0.52653	1.83894	4.73294e-06	0.000237139	0.00019422	5694	tags=44%, list=16%, signal=37%	4257/1622/2023/3939/3939/25800/7015/1075/586/6838/6838/3181/1871/2597/84864/4869/8061/8624/6606/6606/6606/6606/6606/993/4691/3308/65018/5481/5757/4830/2395/5245/6628/6426/6426/51154/1965/1104/5550/6723/2194/11335/4893/22948/5689/5689/5478/8663/10935/26354/5982/9631/3015/4436/3336/10153/4048/4522/7345/7295/6470/6470/5425/3312
PROVENZANI_METASTASIS_UP	PROVENZANI_METASTASIS_UP	201	0.466708	1.71647	4.83133e-06	0.000238257	0.000195135	7210	tags=52%, list=20%, signal=42%	347902/3936/865/8530/7188/203068/203068/203068/203068/203068/203068/203068/203068/231/28638/5019/54360/51809/6645/6645/2653/9601/1266/6645/6645/9500/3916/6320/1075/10959/57415/7414/10200/4602/79070/65108/1029/10253/29995/55277/54502/2806/64146/4242/9189/7520/22879/51690/5464/4172/79009/3185/64222/23169/8883/10771/64087/64087/64087/11130/54458/3704/29100/22903/23450/203068/203068/203068/203068/203…
CHARAFE_BREAST_CANCER_LUMINAL_VS_BASAL_DN	CHARAFE_BREAST_CANCER_LUMINAL_VS_BASAL_DN	446	0.385913	1.53993	4.82942e-06	0.000238257	0.000195135	4962	tags=45%, list=14%, signal=40%	301/87/284119/4478/30011/8900/3628/3490/81618/6646/4240/837/231/6711/100506144/4067/7048/53827/51186/2769/5899/54809/5698/5698/5698/5698/5698/5698/5698/5698/2760/5698/5698/5698/5698/5698/5698/5698/5698/7525/23216/5698/5698/5698/5698/5698/5698/5698/5698/1635/8323/7798/3915/5698/5698/5698/5698/5698/5698/5698/5698/5698/5698/5698/5698/5698/5698/5698/5698/55612/5328/9180/2950/9948/56034/10109/307/873/…
REACTOME_SIGNALING_BY_INTERLEUKINS	REACTOME_SIGNALING_BY_INTERLEUKINS	450	0.380266	1.51796	5.19818e-06	0.000254345	0.000208312	5015	tags=31%, list=14%, signal=27%	301/7431/3976/1439/3936/6809/3581/9173/4478/1435/3576/7409/3566/5780/7076/11213/4067/5777/3561/4282/4282/5698/5698/5698/5698/5698/5698/5698/5698/3574/2889/5778/5698/5698/5698/5698/5698/5698/5698/5698/7525/7132/5698/5698/5698/5698/5698/5698/5698/5698/5698/5698/5698/5698/5698/5698/5698/5698/5698/5698/5698/5698/5698/5698/5698/5698/7184/9180/1072/8835/1265/5696/5696/5696/5696/5696/5696/5696/5696/6776…
DEURIG_T_CELL_PROLYMPHOCYTIC_LEUKEMIA_DN	DEURIG_T_CELL_PROLYMPHOCYTIC_LEUKEMIA_DN	315	0.415062	1.59819	6.44253e-06	0.000312787	0.000256177	6235	tags=23%, list=17%, signal=19%	3248/8519/5579/1043/9840/8611/8530/54843/5552/837/23597/7048/28638/8459/5788/5788/5788/5788/5214/23043/2149/7798/3937/9749/285203/64780/9882/1102/9583/801/10484/8726/7905/23598/29883/54103/10892/80342/54462/8832/91782/116496/22884/1964/2773/22806/51635/27436/9646/10767/10652/596/214/55031/6774/2124/7561/84124/51182/11146/9026/302/23484/51009/6993/10678/7107/57136/1521/1737/9140/8520/253461/57215/…
SARRIO_EPITHELIAL_MESENCHYMAL_TRANSITION_DN	SARRIO_EPITHELIAL_MESENCHYMAL_TRANSITION_DN	142	-0.534707	-1.81886	6.56581e-06	0.000316321	0.00025907	3404	tags=27%, list=9%, signal=24%	999/5364/629/629/629/629/629/629/629/2355/330/900/9231/9231/5349/8349/716/79901/6414/54206/2040/2634/9935/4792/9958/50848/7059/2872/2353/3557/28984/3638/94241/1191/1942/2180/57035/467/10957/694/3913/800/3860/667/1028/1028/5997/1831/59342/10912/604/10158
WP_PROTEASOME_DEGRADATION	WP_PROTEASOME_DEGRADATION	60	0.639748	1.98268	6.84524e-06	0.000327265	0.000268034	5754	tags=45%, list=16%, signal=38%	5698/5698/5698/5698/5698/5698/5698/5698/5698/5698/5698/5698/5698/5698/5698/5698/5698/5698/5698/5698/5698/5698/5698/5698/5698/5698/5698/5698/5698/5698/5698/5698/5698/5698/5698/5698/5698/5698/5698/5698/3133/3133/3133/3133/3133/3133/3133/3133/3133/3133/3133/3133/3133/3133/3133/3133/3133/3133/3133/3133/3133/3133/3133/3133/3133/3133/3133/3133/5696/5696/5696/5696/5696/5696/5696/5696/3134/3134/3134/3134…
REACTOME_SNRNP_ASSEMBLY	REACTOME_SNRNP_ASSEMBLY	54	0.657368	2.00266	7.05707e-06	0.000332319	0.000272173	10762	tags=86%, list=30%, signal=60%	10073/10419/79084/55706/6635/6632/79833/11218/6606/6606/6606/6606/6606/1207/51808/54960/50628/22916/6628/23636/25929/6636/9883/7175/9631/4686/23279/10762/5903/6637/8480/96764/23165/9972/6634/55746/79023/6396/57122/6633/79902/9688/4928/79760/53371/8487/81929/348995/6606/6606/6606/6606/6606/6607/6607/6607
LI_INDUCED_T_TO_NATURAL_KILLER_UP	LI_INDUCED_T_TO_NATURAL_KILLER_UP	310	0.416617	1.60548	7.05591e-06	0.000332319	0.000272173	3242	tags=16%, list=9%, signal=15%	7431/2650/9516/64005/822/4689/4689/8519/79026/10788/1043/3087/6282/10227/54843/84034/10581/53827/8459/441168/3956/80301/56935/6281/8682/2149/23753/5269/80758/5479/5355/3099/3815/54331/51280/969/5937/29967/2242/382/9046/10549/3157/3682/967/84329/4790/55509/26578/1029/84864/58496/58496/58496/58496/58496/58496/58496/832/51097/197259/64855/6856/83892/30844/58496/58496/58496/58496/58496/58496/58496/62…
PUJANA_XPRSS_INT_NETWORK	PUJANA_XPRSS_INT_NETWORK	166	0.482133	1.73432	7.72613e-06	0.00036111	0.000295754	8939	tags=48%, list=25%, signal=37%	10473/7919/7919/7919/7919/7919/7919/7919/7919/399/7919/7919/7919/7919/7919/7919/7919/7919/6776/642/7374/3925/3150/27309/1854/9128/4001/961/79621/5889/4175/6628/6627/167227/7398/10036/8883/9125/5431/11130/11335/23173/1058/11200/10212/81611/84901/5501/4436/2146/835/8914/899/10664/3420/11064/22976/10606/9879/5527/10898/9837/4085/6626/23234/23512/672/5591/22823/1786/6240/5885/4605/7514/6428/4690/7913…
PASINI_SUZ12_TARGETS_DN	PASINI_SUZ12_TARGETS_DN	310	0.415222	1.60011	8.05673e-06	0.000373772	0.000306124	3453	tags=27%, list=10%, signal=25%	301/7431/3487/7171/79026/123920/87/284119/2316/4478/139818/1435/7791/7791/6646/404217/90843/58527/3956/1627/6281/114908/1192/1192/1192/1192/1192/1192/1192/1192/1192/1192/1192/1192/1192/1192/1192/1192/1192/1192/1192/1192/1192/1192/1192/1192/1192/1192/1192/1192/1192/1192/1192/1192/1192/1192/1192/1192/1192/1192/1192/1192/1192/1192/8682/9306/2182/112616/1465/54331/25800/5912/1265/9926/5937/80774/4323…
HOLLMANN_APOPTOSIS_VIA_CD40_UP	HOLLMANN_APOPTOSIS_VIA_CD40_UP	201	0.460406	1.69329	8.86515e-06	0.000408253	0.000334364	5516	tags=38%, list=15%, signal=33%	26228/377/7409/55013/2760/8659/5788/5788/5788/5788/4232/10095/23216/217/26523/22883/10109/28231/4033/26191/23180/10487/4212/2114/142/6632/56945/5062/8932/29883/91782/1854/5908/6856/138050/9711/51176/79022/2339/55909/10430/10767/7520/29887/5880/55326/55326/10102/10980/28986/3065/6390/23640/1212/27257/23139/4809/79709/55658/10212/8504/8895/5218/84790/84549/10437/5202/3149/10376/22870/8914/25804/201…
WEST_ADRENOCORTICAL_TUMOR_UP	WEST_ADRENOCORTICAL_TUMOR_UP	295	0.424224	1.62864	9.15253e-06	0.000418411	0.000342684	7270	tags=33%, list=20%, signal=26%	377/2023/4291/10269/9456/2135/7416/307/6566/6566/79084/79691/51022/54662/3157/10097/23463/23299/79071/23095/2597/10072/6185/47/81873/2739/8872/993/4277/4277/4277/4277/4277/4277/4277/4277/55041/55832/26017/79022/5684/10094/4363/4363/39/10652/9685/10682/7353/5917/6627/54732/58477/1876/8763/10036/23169/51478/11130/10643/908/3065/6597/2000/63916/7024/6678/5717/3842/4893/8634/5701/11108/59286/1717/547…
REACTOME_CLEC7A_DECTIN_1_SIGNALING	REACTOME_CLEC7A_DECTIN_1_SIGNALING	98	0.560098	1.87355	9.77797e-06	0.000443764	0.000363448	4991	tags=62%, list=14%, signal=54%	29108/3709/5698/5698/5698/5698/5698/5698/5698/5698/5698/5698/5698/5698/5698/5698/5698/5698/5698/5698/5698/5698/5698/5698/5698/5698/5698/5698/5698/5698/5698/5698/5698/5698/5698/5698/5698/5698/5698/5698/5698/5698/5696/5696/5696/5696/5696/5696/5696/5696/5530/7321/801/8454/4790/7334/10892/5696/5696/5696/5696/5696/5696/5696/5696/5696/5696/5696/5696/5696/5696/5696/5696/5696/5696/5696/5696/5696/5696/569…
REACTOME_TRNA_PROCESSING	REACTOME_TRNA_PROCESSING	108	0.546699	1.86261	1.01085e-05	0.000455463	0.00037303	9707	tags=48%, list=27%, signal=35%	54913/55706/79691/51002/112858/90353/113179/3028/54888/51605/283989/10775/10940/54931/81605/10978/60528/23636/1787/1478/10557/54802/55644/9883/54517/11102/83480/9692/9692/24140/7175/9631/10248/23279/10799/80324/10556/10762/5903/51493/8480/115708/5901/10898/23165/9972/91801/127253/55746/9692/9692/79023/6396/9836/51095/57122/79902/152992/9688/55687/54901/51504/51367/79897/79897/79897/79897/79897/79…
REACTOME_RNA_POLYMERASE_II_TRANSCRIPTION_TERMINATION	REACTOME_RNA_POLYMERASE_II_TRANSCRIPTION_TERMINATION	66	0.629095	1.97128	1.02794e-05	0.000459856	0.000376628	8550	tags=50%, list=24%, signal=39%	7919/7919/7919/7919/7919/7919/7919/7919/7919/7919/7919/7919/7919/7919/7919/7919/8683/6635/4116/84248/11338/9775/10189/10978/22916/51692/55110/6628/6426/6426/6636/1478/25888/81608/8106/10212/84321/4686/10921/7307/9785/6431/6637/8189/10898/1477/9939/7884/55339/6429/6634/53981/6428/8563/11051/65109/9295/1479/84324/7919/7919/7919/7919/7919/7919/7919/7919
WP_FAS_LIGAND_PATHWAY_AND_STRESS_INDUCTION_OF_HEAT_SHOCK_PROTEINS	WP_FAS_LIGAND_PATHWAY_AND_STRESS_INDUCTION_OF_HEAT_SHOCK_PROTEINS	42	0.708944	2.05014	1.09644e-05	0.000487023	0.000398878	4968	tags=34%, list=14%, signal=29%	397/71/60/1616/1616/1616/1616/1616/1616/4214/840/6709/142/84823/5062/8772/1676/4001/842/317/596/839/9261/8767/1616/1616/1616/1616/1616/1616/1616/1616/1616/1616/1616/1616/841/1616/1616/1616/1616/1616/1616/6885/836
ZHONG_SECRETOME_OF_LUNG_CANCER_AND_FIBROBLAST	ZHONG_SECRETOME_OF_LUNG_CANCER_AND_FIBROBLAST	132	0.517114	1.81206	1.12748e-05	0.00049728	0.000407279	4047	tags=23%, list=11%, signal=20%	5315/822/87/4478/231/2023/5480/2821/2821/3939/3939/1471/60/5269/7184/22883/2950/9948/307/7529/396/4199/975/7414/5037/10447/4869/5230/2739/5690/6418/1917/5684/154881/65979/11315/10036/7148/7148/7148/7148/7148/7148/7148/7148/5685/7534/351/629/629/629/629/629/629/629/629/629/629/629/629/629/629/5688/6678/226/5689/5689/4191
WALLACE_PROSTATE_CANCER_RACE_UP	WALLACE_PROSTATE_CANCER_RACE_UP	295	0.421095	1.61662	1.36298e-05	0.000596949	0.000488908	2577	tags=22%, list=7%, signal=21%	2200/1439/1520/8519/9535/26228/1043/7805/64092/10659/5552/3059/3561/28638/10581/55013/7456/5698/5698/5698/5698/5698/5698/5698/5698/11326/51338/80301/5788/5788/5778/5788/5788/5698/5698/5698/5698/5698/5698/5698/5698/5698/5698/5698/5698/5698/5698/5698/5698/28815/5698/5698/5698/5698/5698/5698/5698/5698/5698/5698/5698/5698/5698/5698/5698/5698/11119/3937/9308/55843/9636/3133/3133/3133/3133/3133/3133/31…
BIDUS_METASTASIS_UP	BIDUS_METASTASIS_UP	216	0.44884	1.67178	1.46022e-05	0.000635093	0.000520149	9152	tags=47%, list=26%, signal=35%	865/6611/84912/7416/57446/8099/54700/54700/9987/8683/10484/6632/3181/5062/23095/10236/10236/4001/4763/7879/55832/55161/90121/55172/9775/1994/10767/3192/9188/22916/6426/6426/92140/2237/4084/6749/22990/10657/5515/4893/55720/1058/3184/3015/6421/7411/219771/3149/1434/55527/10776/10146/5033/129138/8480/8697/137886/4841/10605/990/4085/135295/5876/3832/51729/9555/3190/5591/54915/7485/10728/5594/7531/753…
PEREZ_TP53_AND_TP63_TARGETS	PEREZ_TP53_AND_TP63_TARGETS	204	-0.474302	-1.66831	1.47744e-05	0.00063815	0.000522653	6920	tags=41%, list=19%, signal=33%	114990/114990/3777/8581/80328/55531/399694/55592/3643/6376/121551/80055/10570/116362/9284/9284/4092/8817/4093/30811/80223/360/57822/25861/10724/56241/22861/6867/116113/2258/9727/9727/1152/2049/5979/9473/54855/79755/162989/23119/29116/4804/4091/10018/23117/54897/9547/83716/391267/7477/65055/6414/2035/79778/339665/84440/219654/9935/9903/5795/56924/4880/81606/158158/100506374/115123/7108/3291/151176…
REACTOME_TRANSLATION	REACTOME_TRANSLATION	291	0.413506	1.58617	1.49084e-05	0.00063953	0.000523783	7791	tags=37%, list=22%, signal=29%	54948/64949/51116/64975/25973/51067/1650/23471/123263/56945/90701/122704/6185/7284/23478/1964/64983/29093/64968/1917/9801/55699/9553/10952/65080/60488/5917/5464/63931/58477/1965/6184/9789/10102/28998/54516/51258/57176/57176/57176/57176/57176/57176/8662/23708/6746/6183/6183/8668/65008/57505/29088/116832/65993/124995/8663/6726/51649/79731/51073/1967/8893/64963/200916/65003/10480/1981/2193/57129/605…
LEE_DIFFERENTIATING_T_LYMPHOCYTE	LEE_DIFFERENTIATING_T_LYMPHOCYTE	190	0.463468	1.69251	1.55322e-05	0.000661758	0.000541988	1799	tags=20%, list=5%, signal=19%	397/9452/9535/1794/8635/5579/1043/7805/7409/10659/3059/84636/28638/5698/5698/5698/5698/5698/5698/5698/5698/5294/27040/5788/5788/5788/5788/5698/5698/5698/5698/5698/5698/5698/5698/5698/5698/5698/5698/5698/5698/5698/5698/399/92241/5698/5698/5698/5698/5698/5698/5698/5698/5698/5698/5698/5698/5698/5698/5698/5698/55843/5588/286530/3071/23526/3140/23429/23429/100129792/89857/6046/6046/6046/6046/6046/6046…
REACTOME_PTEN_REGULATION	REACTOME_PTEN_REGULATION	138	0.498652	1.76514	1.56722e-05	0.000663209	0.000543176	6031	tags=54%, list=17%, signal=45%	6015/6015/6015/6015/6015/6015/5698/5698/5698/5698/5698/5698/5698/5698/5698/5698/5698/5698/5698/5698/5698/5698/5698/5698/5698/5698/5698/5698/5698/5698/26523/5698/5698/5698/5698/5698/5698/5698/5698/5698/5698/5698/5698/5698/5698/5698/5698/5696/5696/5696/5696/5696/5696/5696/5696/192670/207/8726/5987/5987/5987/5987/5987/5987/5987/23028/53615/5696/5696/5696/5696/5696/5696/5696/5696/5696/5696/5696/5696/…
ODONNELL_TFRC_TARGETS_UP	ODONNELL_TFRC_TARGETS_UP	373	-0.414375	-1.5405	1.64036e-05	0.000689502	0.000564711	6317	tags=19%, list=18%, signal=16%	79465/54329/3117/3117/3117/3117/3117/3117/3117/3117/3117/3117/3117/3117/3117/3117/140739/56896/2559/90342/26086/327657/924/4897/10608/440503/405753/153478/8470/8848/5265/5265/8764/8764/255488/26137/960/5069/200316/414328/10974/8013/3117/3117/3117/3117/3117/3117/3117/3117/3117/3117/3117/3117/3117/3117/355/79669/79669/2626/2626/57091/32/2232/83999/283585/939/23345/29850/653145/6554/3423/53373/5619/…
HOLLERN_EMT_BREAST_TUMOR_UP	HOLLERN_EMT_BREAST_TUMOR_UP	139	0.497163	1.7609	1.72137e-05	0.000718729	0.000588648	2314	tags=22%, list=6%, signal=21%	7431/3487/3087/1435/6711/7048/100532736/55013/53827/8905/11326/1627/375387/6688/11328/57190/4056/4056/7903/2593/114804/5817/83742/10484/1796/558/121457/5908/53838/51100/6275/4772
MORI_LARGE_PRE_BII_LYMPHOCYTE_DN	MORI_LARGE_PRE_BII_LYMPHOCYTE_DN	57	0.635237	1.94472	1.91658e-05	0.000790562	0.00064748	5940	tags=13%, list=17%, signal=11%	822/1520/3936/1512/1794/51291/3566/6646/5777/3561/23499/7456/5788/5788/5788/5788/217/25939/9308/1992/5863/5863/5863/5863/5863/3685/9026/5863/5863/5863/5863/5863/5863/5863/5863/5863/5863/5863/5863/5863/5863/5863/5863/5863/5863/5863/5863/22821/22821/113/972/2799/202/3109/3109/3109/3109/3109/3109/3109/3109/4170
HORIUCHI_WTAP_TARGETS_DN	HORIUCHI_WTAP_TARGETS_DN	316	0.409532	1.57604	1.91866e-05	0.000790562	0.00064748	8978	tags=42%, list=25%, signal=32%	6526/2316/231/28638/4090/7919/7919/7919/7919/7919/7919/7919/7919/55165/3939/3939/114908/54360/5355/4131/1445/93663/7919/7919/7919/7919/7919/7919/7919/7919/1265/84650/57587/7903/57646/382/9397/56938/3837/84823/2790/7374/23333/221830/51805/51260/3945/5230/57486/2739/22929/4001/253832/5825/708/663/55161/39/64216/221150/2744/8091/3920/5245/58477/55154/64222/3454/23484/9589/50999/27032/57198/2194/1819…
GAZDA_DIAMOND_BLACKFAN_ANEMIA_PROGENITOR_DN	GAZDA_DIAMOND_BLACKFAN_ANEMIA_PROGENITOR_DN	64	0.619554	1.94494	1.96137e-05	0.000802881	0.000657569	5890	tags=45%, list=16%, signal=38%	3709/3490/2171/4925/2653/60509/5827/5325/10434/26227/5867/3920/839/908/6597/318/400/23658/23279/25998/25998/23137/10528/90956/84061/1047/55364/29927/11052/5394
KEGG_ALZHEIMERS_DISEASE	KEGG_ALZHEIMERS_DISEASE	163	0.484729	1.74018	2.00491e-05	0.000815374	0.000667801	9861	tags=47%, list=27%, signal=34%	3709/6263/7132/4718/2903/840/5530/51107/801/2776/3028/2597/8772/348/842/55851/4708/3708/5664/522/518/317/3416/4717/498/5663/4513/8883/4706/4514/9451/4712/4707/6390/4509/7388/351/5595/7386/841/4704/9377/1345/27089/7384/4702/836/5534/4709/506/1337/517/1351/23385/4725/56901/4722/4722/6392/4710/509/4694/6389/4714/513/5594/1327/4731/102/4311/25825/515/4715/1329/6391/54205/4713/539/8851/6868/775/775/10…
REACTOME_C_TYPE_LECTIN_RECEPTORS_CLRS	REACTOME_C_TYPE_LECTIN_RECEPTORS_CLRS	138	0.49582	1.75512	2.11717e-05	0.000855473	0.000700643	4991	tags=45%, list=14%, signal=39%	29108/3709/4067/5698/5698/5698/5698/5698/5698/5698/5698/5698/5698/5698/5698/5698/5698/5698/5698/3385/5698/5698/5698/5698/5698/5698/5698/5698/5698/5698/5698/5698/5698/5698/5698/5698/5698/5698/5698/5698/5698/5698/5698/5698/5696/5696/5696/5696/5696/5696/5696/5696/56667/5530/7321/801/8454/4790/5062/7334/10892/3384/5567/5696/5696/5696/5696/5696/5696/5696/5696/5696/5696/5696/5696/5696/5696/5696/5696/56…
SCHLOSSER_MYC_TARGETS_AND_SERUM_RESPONSE_UP	SCHLOSSER_MYC_TARGETS_AND_SERUM_RESPONSE_UP	48	0.657136	1.97095	2.13341e-05	0.00085651	0.000701492	9432	tags=59%, list=26%, signal=44%	23516/7416/9791/5954/84823/221830/1964/7371/3276/50628/4830/2395/51690/1312/6628/80742/80742/80742/80742/80742/80742/80742/7064/10127/55720/23173/23423/4839/9522/79080/9669/29902/23082/483/1642/2935/3609/4953/8975/55174/25814/80273/10645/80742/80742/80742/80742/80742/80742/80742/80742/80742/80742/80742/80742/80742/80742
RHODES_CANCER_META_SIGNATURE	RHODES_CANCER_META_SIGNATURE	65	0.611839	1.92132	2.2089e-05	0.000875591	0.00071712	6061	tags=74%, list=17%, signal=61%	203068/203068/203068/203068/203068/203068/203068/203068/1875/3939/3939/7184/7873/6659/10549/6635/3181/47/3460/3460/9775/5757/5721/5721/22916/4830/4172/3460/3460/3608/6636/3065/6597/11335/6742/6742/6742/6742/6183/6183/203068/203068/203068/203068/203068/203068/203068/203068/203068/203068/203068/203068/203068/203068/203068/203068/203068/203068/203068/203068/203068/203068/203068/203068/203068/203068/…
SENESE_HDAC1_TARGETS_UP	SENESE_HDAC1_TARGETS_UP	437	0.37169	1.48359	2.19712e-05	0.000875591	0.00071712	7022	tags=33%, list=20%, signal=27%	4257/6947/3936/865/6809/161742/3576/23516/5552/8826/118429/7048/2760/9057/22858/5339/4149/5328/9180/2137/11021/28231/25800/6566/6566/9749/2669/396/92092/54700/54700/10959/10434/10097/51107/9583/375449/25909/81542/25832/23333/116064/253782/81537/81537/51765/2004/8061/8439/197259/1108/4664/51330/79027/55619/1052/55041/90861/9774/7019/3708/64393/3998/84516/1829/1660/7430/221035/6533/5829/11198/5880/…
PID_CASPASE_PATHWAY	PID_CASPASE_PATHWAY	51	0.645182	1.96205	2.36695e-05	0.000912985	0.000747746	5144	tags=22%, list=14%, signal=19%	7431/397/837/7132/4214/840/6709/142/84823/1676/4001/842/317/596/839/8567/351/331/841/6304/835/836/8737/5551/7186
BLANCO_MELO_HUMAN_PARAINFLUENZA_VIRUS_3_INFECTION_A594_CELLS_DN	BLANCO_MELO_HUMAN_PARAINFLUENZA_VIRUS_3_INFECTION_A594_CELLS_DN	108	-0.552733	-1.81081	2.35787e-05	0.000912985	0.000747746	5518	tags=30%, list=15%, signal=26%	90113/220359/10398/10083/66002/113220/5345/5345/360/6755/2306/9514/90288/115703/2049/5625/5625/27237/53947/7923/7923/7923/7923/7923/7923/7923/7923/7923/7923/7923/7923/7923/7923/7923/7923/7923/7923/7923/7923/7923/7923/7923/7923/7923/7923/7923/7923/7923/7923/7923/7923/7923/7923/7923/7923/150244/3960/3960/23546/256329/256329/79444/4059/51171/10382/441150/3026/642475/642475/11094/11094/23263/55806/54…
KIM_MYC_AMPLIFICATION_TARGETS_UP	KIM_MYC_AMPLIFICATION_TARGETS_UP	196	0.446735	1.63596	2.36208e-05	0.000912985	0.000747746	5374	tags=36%, list=15%, signal=31%	9223/9223/231/2023/2821/2821/27040/6566/6566/51116/84650/84365/642/10434/23076/3787/8525/56919/47/3945/55170/84864/10857/8624/8209/2806/51144/4691/55276/54931/54865/9188/4830/84916/84916/6741/11315/9459/375061/28998/23077/10128/28985/28985/54517/55646/6742/6742/6742/6742/3419/4752/10885/224/65993/57181/51762/54962/9771/51388/51728/28987/51649/9136/4733/9131/122830/84549/2526/91942/10528/178/12316…
SHEN_SMARCA2_TARGETS_DN	SHEN_SMARCA2_TARGETS_DN	297	-0.435061	-1.58982	2.36929e-05	0.000912985	0.000747746	8398	tags=19%, list=23%, signal=15%	2491/170680/170680/170680/170680/170680/170680/8521/655/3761/5078/8997/23349/1748/112/54866/5995/4109/6540/6512/10068/815/362/6900/8288/8170/1589/1589/1589/1589/1589/1589/933/269/11154/23120/8812/5452/10333/4130/2525/26093/1576/2797/1136/766/7480/8909/63978/10083/6953/3111/3111/3111/3111/3111/3111/3111/8431/343/1583/1583/27284/57663/771/64591/79012/9032/1874/49/49/1813/23553/79400/64895/250/1302/…
BLUM_RESPONSE_TO_SALIRASIB_DN	BLUM_RESPONSE_TO_SALIRASIB_DN	338	0.396749	1.53056	2.37612e-05	0.000912985	0.000747746	6509	tags=45%, list=18%, signal=37%	5315/865/10788/203068/203068/203068/203068/203068/203068/203068/203068/1718/11001/2023/3939/3939/7155/4232/2589/2149/1266/5827/8099/5223/2593/6659/10451/4884/4212/142/951/6632/57045/3181/3837/81537/81537/3925/7334/10951/47/10236/10236/51427/10224/4670/8204/993/1854/2590/5825/10492/23596/23596/1660/518/4285/4913/5867/5141/10682/8208/4175/2287/4947/4172/6627/6426/6426/51182/7398/10036/64087/64087/6…
WANG_LMO4_TARGETS_DN	WANG_LMO4_TARGETS_DN	351	0.39476	1.53015	2.45045e-05	0.000935802	0.000766433	8507	tags=47%, list=24%, signal=36%	2624/54843/6711/8826/5139/54809/8573/2161/91694/91694/537/25939/10419/87769/59338/8365/54700/54700/57646/80824/80824/3157/10097/126298/25917/5062/567/567/11218/9689/10493/9616/57325/55661/90231/131076/55041/64746/90861/51100/51136/51406/54865/2230/55031/84916/84916/6627/1211/147007/388610/8672/9637/684/256586/353274/353274/8546/331/10564/201931/8992/10574/84108/9320/54487/29035/10471/10471/10471/…
MARTINEZ_RESPONSE_TO_TRABECTEDIN_DN	MARTINEZ_RESPONSE_TO_TRABECTEDIN_DN	270	0.421493	1.59585	2.63497e-05	0.00100017	0.000819152	8156	tags=49%, list=23%, signal=38%	64110/55165/7798/1022/1022/51523/24145/1462/10927/8683/79071/84287/79649/23683/11218/81873/23028/6733/5567/10253/23326/8061/8772/5908/7371/3305/3305/3305/3305/3305/10197/55172/2339/27436/4236/26135/7520/9188/26065/26065/2965/2965/22894/60488/5868/23528/4172/3066/10102/5685/1104/54439/54439/3305/3305/3305/3305/3305/26128/6832/23077/81029/9532/55148/55148/28985/28985/10564/11102/65008/29088/5701/56…
BERTUCCI_MEDULLARY_VS_DUCTAL_BREAST_CANCER_UP	BERTUCCI_MEDULLARY_VS_DUCTAL_BREAST_CANCER_UP	200	0.447897	1.64716	2.77027e-05	0.00104485	0.000855743	6376	tags=45%, list=18%, signal=38%	1520/1535/5552/5777/1875/5698/5698/5698/5698/5698/5698/5698/5698/55165/441168/5698/5698/5698/5698/5698/5698/5698/5698/5698/5698/5698/5698/5698/5698/5698/5698/130589/5698/5698/5698/5698/5698/5698/5698/5698/5698/5698/5698/5698/5698/5698/5698/5698/57473/11119/157/7004/79814/5912/29126/6890/6890/6890/6890/6890/6890/6890/6890/5696/5696/5696/5696/5696/5696/5696/5696/79029/6949/25953/2992/8879/9466/9466…
RUTELLA_RESPONSE_TO_HGF_VS_CSF2RB_AND_IL4_UP	RUTELLA_RESPONSE_TO_HGF_VS_CSF2RB_AND_IL4_UP	408	0.383638	1.51262	2.78604e-05	0.00104485	0.000855743	3163	tags=16%, list=9%, signal=15%	6526/412/8635/10788/5579/1043/221692/55/3490/1718/231/11213/4013/10581/53346/51186/11326/2760/51338/23216/1675/1675/9765/93349/3099/23433/4853/1728/4033/3133/3133/3133/3133/3133/3133/3133/3133/3133/3133/3133/3133/3133/3133/3133/3133/3133/3133/3133/3133/3133/3133/3133/3133/3133/3133/3133/3133/9019/51063/6924/3916/4199/259230/3705/3705/2820/26175/26175/4145/975/719/586/51232/51232/48/10384/2629/262…
REACTOME_RESPIRATORY_ELECTRON_TRANSPORT_ATP_SYNTHESIS_BY_CHEMIOSMOTIC_COUPLING_AND_HEAT_PRODUCTION_BY_UNCOUPLING_PROTEINS	REACTOME_RESPIRATORY_ELECTRON_TRANSPORT_ATP_SYNTHESIS_BY_CHEMIOSMOTIC_COUPLING_AND_HEAT_PRODUCTION_BY_UNCOUPLING_PROTEINS	126	0.509177	1.77267	2.8187e-05	0.0010508	0.000860622	9861	tags=67%, list=27%, signal=49%	4718/51241/55863/4708/522/518/6341/4717/79133/498/4513/4706/51103/4514/4712/51204/10128/4707/6390/4509/7388/29078/10632/4537/51079/7386/4704/9377/1345/51300/51295/1353/27089/10131/91942/7384/285521/4702/55967/4709/506/1337/517/1351/4725/4722/4722/6392/4710/509/4694/6389/4714/513/1327/54539/4731/9551/515/4715/1329/6391/54205/4713/539/4541/55471/137682/4726/4508/116228/4729/4698/4716/29796/4720/470…
ZHANG_RESPONSE_TO_CANTHARIDIN_DN	ZHANG_RESPONSE_TO_CANTHARIDIN_DN	67	0.611387	1.92558	2.83868e-05	0.00105199	0.000861593	6903	tags=60%, list=19%, signal=48%	11001/2171/2968/2968/2968/2968/2968/2968/5223/4602/6632/51491/2068/5211/4708/518/3183/11198/6627/10856/4712/2971/8662/7388/3419/7752/5860/10131/10528/2193/2189/4522/2968/2968/2968/2968/2968/2968/2968/2968/2968/2968/2968/2968/517/5425/4722/4722/11222/6626/2968/2968/2968/2968/2968/2968/5437/9748/6631/1327/6240/24139
HALLMARK_MYC_TARGETS_V2	HALLMARK_MYC_TARGETS_V2	58	0.619895	1.90203	3.0476e-05	0.00112277	0.000919563	7303	tags=72%, list=20%, signal=57%	3099/79077/6949/51491/7374/4869/10199/9221/79711/79711/64216/5245/51154/79050/79050/6723/6832/23481/9238/81887/83743/29078/56342/11335/4839/51388/26354/9136/80324/3336/10528/2193/23160/92856/6573/10514/7965/23082/8886/10244/56915/5347/3177
BRACHAT_RESPONSE_TO_CAMPTOTHECIN_DN	BRACHAT_RESPONSE_TO_CAMPTOTHECIN_DN	42	0.694475	2.0083	3.24842e-05	0.00118976	0.000974426	4464	tags=72%, list=12%, signal=63%	203068/203068/203068/203068/203068/203068/203068/203068/10581/2023/2821/2821/205/23344/307/6776/3157/5954/2597/26578/578/596/2287/6741/203068/203068/203068/203068/203068/203068/203068/203068/203068/203068/203068/203068/203068/203068/203068/203068/203068/203068/203068/203068/203068/203068/203068/203068/203068/203068/203068/203068/203068/203068/203068/203068/203068/203068/203068/203068/203068/20306…
REACTOME_RAC2_GTPASE_CYCLE	REACTOME_RAC2_GTPASE_CYCLE	87	0.552109	1.81514	3.30899e-05	0.00120489	0.000986823	6587	tags=48%, list=18%, signal=40%	4689/4689/1794/50619/1535/7409/57580/8826/23344/4168/396/29/29/29/3071/23075/613/10451/51347/5062/392/11135/7879/55619/3998/1829/7410/5880/51566/23141/28964/55004/2909/23592/55114/55114/10006/5295/9732/10787/998/143872/9815/9341/4580
REACTOME_INTERLEUKIN_12_SIGNALING	REACTOME_INTERLEUKIN_12_SIGNALING	47	0.66089	1.97263	3.38145e-05	0.00122416	0.0010026	5191	tags=50%, list=14%, signal=43%	3936/4478/4282/4282/1072/1265/9049/9987/3181/5062/5908/4001/5721/5721/5898/6627/3185/302/552900/552900/654483/5478/4507/6950/3716/829
WELCSH_BRCA1_TARGETS_DN	WELCSH_BRCA1_TARGETS_DN	140	0.495225	1.75603	3.41626e-05	0.00122966	0.0010071	6139	tags=40%, list=17%, signal=34%	4257/51083/1718/311/9647/10555/2653/7916/7916/7916/7916/7916/7916/7916/7184/9761/7416/7873/6949/6659/23076/5585/22984/84823/6046/6046/6046/6046/6046/6046/6046/23203/10946/8872/1108/595/3265/3265/9221/7430/7520/5822/7916/7916/7916/7916/7916/7916/7916/1652/1652/1652/5917/6627/1211/471/10036/1104/6723/6597/6749/8943/8662/2194/6742/6742/6742/6742/6183/6183/7922/7922/7922/7922/7922/7922/7922/7922/7922…
YAO_TEMPORAL_RESPONSE_TO_PROGESTERONE_CLUSTER_1	YAO_TEMPORAL_RESPONSE_TO_PROGESTERONE_CLUSTER_1	69	-0.610528	-1.88926	3.60146e-05	0.00128891	0.00105563	5990	tags=53%, list=17%, signal=44%	7148/7148/7148/7148/7148/7148/7148/7148/7148/7148/7148/7148/7148/7148/7148/7148/84532/8233/7148/7148/7148/7148/7148/7148/7148/7148/1326/10018/7148/7148/7148/7148/7148/7148/7148/7148/65125/9547/957/56975/56975/56975/56975/54464/1051/687/3078/3399/3399/23371/26993/8660/1649/3816/7148/7148/7148/7148/7148/7148/7148/7148/10628/4052/11185/2309/3855/10397/4616/1843/3306/10912/604
REACTOME_TRANSPORT_OF_MATURE_TRANSCRIPT_TO_CYTOPLASM	REACTOME_TRANSPORT_OF_MATURE_TRANSCRIPT_TO_CYTOPLASM	84	0.561819	1.83121	3.67097e-05	0.00130632	0.00106989	8759	tags=50%, list=24%, signal=38%	7919/7919/7919/7919/7919/7919/7919/7919/7919/7919/7919/7919/7919/7919/7919/7919/55706/8683/4116/84248/11338/9775/10189/22916/51692/55110/29107/6426/6426/23636/9883/2733/81608/7175/10212/84321/9631/4686/23279/10921/7307/9785/10762/6431/5903/8480/8189/10898/9939/23165/7884/9972/55339/6429/53981/6428/8563/55746/79023/6396/65109/9295/57122/84324/7919/7919/7919/7919/7919/7919/7919/7919/79902/80145/9688
YAMAZAKI_TCEB3_TARGETS_UP	YAMAZAKI_TCEB3_TARGETS_UP	166	0.464149	1.66963	3.9252e-05	0.0013889	0.00113753	3200	tags=43%, list=9%, signal=40%	3487/463/2034/59274/7791/7791/5780/4240/5552/1471/2752/1192/1192/1192/1192/1192/1192/1192/1192/1192/1192/1192/1192/1192/1192/1192/1192/1192/1192/1192/1192/1192/1192/1192/1192/1192/1192/1192/1192/1192/1192/1192/1192/1192/1192/1192/1192/1192/1192/1192/1192/1192/1192/81539/2923/3915/537/6690/11328/3815/7078/6566/6566/6836/6836/10959/11015/23071/8673/801/5351/8454/5954/2790/55788/567/567/11135/8797/2…
REACTOME_REGULATION_OF_MRNA_STABILITY_BY_PROTEINS_THAT_BIND_AU_RICH_ELEMENTS	REACTOME_REGULATION_OF_MRNA_STABILITY_BY_PROTEINS_THAT_BIND_AU_RICH_ELEMENTS	86	0.565379	1.85614	3.9886e-05	0.00139621	0.00114351	4991	tags=59%, list=14%, signal=51%	5698/5698/5698/5698/5698/5698/5698/5698/5698/5698/5698/5698/5698/5698/5698/5698/5698/5698/5698/5698/5698/5698/5698/5698/5698/5698/5698/5698/5698/5698/5698/5698/5698/5698/5698/5698/5698/5698/5698/5698/7529/5696/5696/5696/5696/5696/5696/5696/5696/207/5600/5696/5696/5696/5696/5696/5696/5696/5696/5696/5696/5696/5696/5696/5696/5696/5696/5696/5696/5696/5696/5696/5696/5696/5696/5696/5696/5696/5696/5696/…
BLANCO_MELO_COVID19_SARS_COV_2_INFECTION_A594_ACE2_EXPRESSING_CELLS_UP	BLANCO_MELO_COVID19_SARS_COV_2_INFECTION_A594_ACE2_EXPRESSING_CELLS_UP	477	-0.395435	-1.49598	3.99045e-05	0.00139621	0.00114351	5246	tags=28%, list=15%, signal=25%	5514/5514/5514/5514/5514/5514/5514/200316/51585/84919/161253/10974/9586/57664/6498/57396/64577/8013/115361/78994/8840/64761/148523/79365/23036/4194/339883/487/91603/221302/10289/6616/717/717/717/717/717/717/717/84628/4097/148252/7633/55565/64412/9792/9473/23099/3097/60494/9881/5016/200424/8482/8482/10620/2824/55294/905/4050/4050/4050/4050/4050/4050/4050/4050/330/8870/8870/8870/8870/8870/8870/1106…
HALLMARK_MYOGENESIS	HALLMARK_MYOGENESIS	200	-0.468511	-1.65037	4.0406e-05	0.0014059	0.00115145	7174	tags=46%, list=20%, signal=37%	9260/29970/29970/5507/4633/8553/4303/187/89/8038/3757/1292/3679/25803/4208/9659/58498/7135/26287/2548/1160/1384/1293/2934/1158/4656/3983/29895/1346/2273/6016/6840/487/4151/6525/6261/1339/1152/2049/5816/5816/3479/4205/3688/115/208/6442/7140/7140/79629/1837/165/4634/1306/6535/6450/274/948/89797/845/2775/4851/65055/7136/7136/88/2065/23654/8736/7134/6764/1839/4638/9172/9172/1974/6876/7433/2281/1277/2…
MOOTHA_VOXPHOS	MOOTHA_VOXPHOS	87	0.549302	1.80591	4.08495e-05	0.00141348	0.00115766	9861	tags=72%, list=27%, signal=52%	27018/4718/29883/53615/4708/522/518/4717/4706/4712/4707/6390/7388/10632/51079/7386/4704/9377/1345/1353/27089/7384/4702/6835/6835/4709/506/1337/517/1351/4725/56901/4722/4722/6392/4710/509/4694/6389/4714/513/1327/9551/515/1329/6391/54205/4713/539/1352/4726/1355/4698/29796/1347/4720/4700/4700/4700/4700/4700/4700/4700/4700/4700/4700/4700/4700/4700/4700/4700/5188/4696/4696/4696/4696/4696/4696/4696/469…
ENK_UV_RESPONSE_EPIDERMIS_UP	ENK_UV_RESPONSE_EPIDERMIS_UP	291	0.402338	1.54333	4.1286e-05	0.00142074	0.0011636	5250	tags=31%, list=15%, signal=26%	10385/397/87/2316/1435/7791/7791/3566/9168/5836/9454/53827/5899/5214/10069/2161/6611/5479/1612/9180/3099/10419/7004/7873/6566/6566/5223/10919/10919/10919/10919/10919/10919/10919/4199/56938/3682/1992/10384/10200/4074/10072/10919/10919/10919/10919/10919/10919/10919/10919/10919/10919/10919/10919/10919/10919/10113/8195/8195/8195/22800/6286/5690/1798/1829/10197/961/7436/5436/10919/10919/10919/10919/10…
BIOCARTA_AHSP_PATHWAY	BIOCARTA_AHSP_PATHWAY	13	-0.893913	-1.94775	4.2218e-05	0.00144487	0.00118337	2411	tags=85%, list=7%, signal=79%	7389/2235/1371/51327/3145/7390/210/3043/3039/212/3040
SCHLOSSER_MYC_TARGETS_AND_SERUM_RESPONSE_DN	SCHLOSSER_MYC_TARGETS_AND_SERUM_RESPONSE_DN	48	0.645002	1.93456	4.28789e-05	0.00145952	0.00119536	6720	tags=64%, list=19%, signal=52%	2171/3939/3939/109/10549/8454/3654/1964/10440/4691/8725/10492/9801/9188/8602/10969/9532/9830/10954/7347/24140/10799/26156/1434/10153/10606/51096/5901/2091/2091/23212/5612
PAL_PRMT5_TARGETS_UP	PAL_PRMT5_TARGETS_UP	200	0.440317	1.61928	4.50736e-05	0.00152592	0.00124975	8276	tags=52%, list=23%, signal=40%	822/7529/10919/10919/10919/10919/10919/10919/10919/171546/5325/5935/1462/27166/4790/3654/92675/3925/10919/10919/10919/10919/10919/10919/10919/10919/10919/10919/10919/10919/10919/10919/7284/10946/1964/84316/11171/1892/3308/6418/11338/83460/3191/3191/79711/79711/10919/10919/10919/10919/10919/10919/10919/22916/4830/6426/6426/6423/9789/9589/2079/81892/10559/51079/8520/81611/5955/55213/2332/1487/51602…
WP_VEGFAVEGFR2_SIGNALING_PATHWAY	WP_VEGFAVEGFR2_SIGNALING_PATHWAY	431	0.370037	1.46757	4.67372e-05	0.00157374	0.00128891	3969	tags=27%, list=11%, signal=24%	301/51309/5579/2624/7114/3576/71/2317/3490/5780/56907/9168/23597/5216/8826/5777/6300/3939/3939/2889/1192/1192/1192/1192/1192/1192/1192/1192/1192/1192/1192/1192/1192/1192/1192/1192/1192/1192/1192/1192/1192/1192/1192/1192/1192/1192/1192/1192/1192/1192/1192/1192/1192/1192/1192/1192/1192/1192/1192/1192/1192/1192/23753/9564/9564/5328/1465/1072/1445/7004/6924/10755/4323/382/5584/5530/124491/7414/10130/…
YAGI_AML_FAB_MARKERS	YAGI_AML_FAB_MARKERS	191	0.449901	1.64634	5.1061e-05	0.00170104	0.00139317	5314	tags=28%, list=15%, signal=24%	1439/822/3936/79026/2624/6263/55353/1718/28951/216/3561/28638/8905/8459/3956/6281/4149/2149/25939/7078/10755/10321/3588/3157/9508/7414/48/79071/375449/80777/10040/3384/22800/7915/9094/8624/1890/10962/9553/9646/8398/4172/3608/8763/8883/23141/302/9532/7225/1521/5457/3796/10768/11142/871/8476/10437/3459/7644/10762/1475/8836/81855/6310/6309
HALLMARK_KRAS_SIGNALING_DN	HALLMARK_KRAS_SIGNALING_DN	199	-0.467136	-1.64455	5.08739e-05	0.00170104	0.00139317	9117	tags=54%, list=25%, signal=41%	4439/4439/4439/4439/4439/4439/4439/4439/3785/3785/1280/9499/4439/4439/4439/4439/4439/4439/4439/4439/5030/79696/57016/3779/5078/525/5540/6531/6531/2813/51156/51156/4524/3851/3866/152/7356/1360/105375355/105375355/5077/51806/1907/1271/6559/1014/6528/10686/8115/2261/57118/4210/91543/23031/23676/3750/1158/5650/3848/6620/6498/5409/7704/9194/55610/51168/6261/1952/4439/4439/4439/4439/4439/4439/4439/4439…
RUTELLA_RESPONSE_TO_CSF2RB_AND_IL4_UP	RUTELLA_RESPONSE_TO_CSF2RB_AND_IL4_UP	337	0.390953	1.50853	5.33888e-05	0.00176918	0.00144898	3947	tags=24%, list=11%, signal=22%	9516/6526/8611/7188/10659/1718/1429/51186/2760/5361/4065/23682/9765/6611/157/1465/9308/1728/9019/6924/9683/64780/23180/8879/9882/4199/2820/54662/53905/4145/975/57415/5817/51232/51232/8804/48/2629/2629/967/8726/253782/1454/55509/65108/8202/54462/8832/10493/116496/9/8624/348/22929/54502/595/2806/79155/4001/1798/56954/22882/5664/54/1603/961/10134/55686/211/2744/3920/51227/2926/8623/3066/9367/1965/84…
KEGG_PROTEASOME	KEGG_PROTEASOME	44	0.662658	1.94257	5.38575e-05	0.00177531	0.001454	4991	tags=71%, list=14%, signal=62%	5698/5698/5698/5698/5698/5698/5698/5698/5698/5698/5698/5698/5698/5698/5698/5698/5698/5698/5698/5698/5698/5698/5698/5698/5698/5698/5698/5698/5698/5698/5698/5698/5698/5698/5698/5698/5698/5698/5698/5698/5696/5696/5696/5696/5696/5696/5696/5696/5696/5696/5696/5696/5696/5696/5696/5696/5696/5696/5696/5696/5696/5696/5696/5696/5696/5696/5696/5696/5696/5696/5696/5696/5696/5696/5696/5696/5696/5696/5696/5696…
HUANG_DASATINIB_SENSITIVITY_UP	HUANG_DASATINIB_SENSITIVITY_UP	80	0.554417	1.79324	5.71766e-05	0.00186064	0.00152389	2825	tags=49%, list=8%, signal=46%	301/284119/4478/30011/7791/7791/3628/118429/4067/7048/53827/5698/5698/5698/5698/5698/5698/5698/5698/5698/5698/5698/5698/5698/5698/5698/5698/5698/5698/5698/5698/5698/5698/5698/5698/5698/5698/5698/5698/5698/5698/5698/5698/5698/5698/5698/5698/5698/5698/5698/5698/5328/9180/56034/5696/5696/5696/5696/5696/5696/5696/5696/11118/10384/152137/2004/5696/5696/5696/5696/5696/5696/5696/5696/5696/5696/5696/5696…
KEGG_OXIDATIVE_PHOSPHORYLATION	KEGG_OXIDATIVE_PHOSPHORYLATION	129	0.496978	1.73628	5.70823e-05	0.00186064	0.00152389	9861	tags=50%, list=27%, signal=37%	155066/4718/537/4708/522/518/4717/90423/5464/498/245973/4513/4706/4514/4712/4707/6390/4509/7388/8992/10632/4537/7386/4704/9377/1345/1353/27089/7384/4702/4709/506/1337/517/1351/4725/56901/4722/4722/6392/4710/509/4694/6389/51382/27068/4714/513/1327/4731/9551/527/515/4715/1329/6391/4713/539/23545/1352/4541/528/9550/4726/496/496/4508/4729/440567/1355/4698/4716/29796/1347/4720/10312/4700/4700/4700/470…
MEBARKI_HCC_PROGENITOR_FZD8CRD_DN	MEBARKI_HCC_PROGENITOR_FZD8CRD_DN	414	-0.398233	-1.48722	5.73373e-05	0.00186064	0.00152389	7352	tags=32%, list=20%, signal=26%	63924/116071/399948/254439/84179/275/720/720/720/720/440104/2168/4647/643669/643669/9615/127845/721/721/721/721/721/401024/276/721/721/721/721/721/1589/1589/1589/1589/1589/1589/5507/130013/2628/55195/126520/30813/80339/8581/89953/80176/5244/1014/160622/3643/10686/2938/51733/50859/58510/118491/6480/2620/2444/2159/3249/2888/440503/200010/283927/5265/5265/3175/50717/5176/5176/11247/340371/84532/1159…
KAAB_FAILED_HEART_ATRIUM_DN	KAAB_FAILED_HEART_ATRIUM_DN	146	0.470769	1.67471	6.01026e-05	0.00194032	0.00158915	6888	tags=51%, list=19%, signal=41%	8519/87/23516/7048/3939/3939/60/91/1266/11328/9761/9180/2950/171546/10434/7126/9741/11165/2280/2885/5230/10493/10016/55041/2746/27020/5684/5604/10548/10548/10430/3191/3191/5787/9188/51690/7341/6774/4172/9367/10479/7534/2971/351/10175/7107/10972/4809/8992/8668/5689/5689/9538/5376/5501/3459/7570/6388/253725/11047/966/7295/10204/1337/55627/5901/23199/4831/9587/1716/5693/1797/1797/1797/1797/1797/1797…
PILON_KLF1_TARGETS_UP	PILON_KLF1_TARGETS_UP	490	-0.384934	-1.46071	6.10676e-05	0.00196137	0.00160638	4257	tags=28%, list=12%, signal=25%	388931/55937/55937/55937/55937/55937/55937/55937/345611/350/9969/55196/26005/5362/163259/23637/8301/3263/150527/286205/54855/163732/8727/10107/10107/10107/10107/10107/10107/10107/10107/10107/10107/10107/10107/10107/10107/10107/10107/5087/1301/629/629/629/629/629/629/629/56648/51147/55937/55937/55937/55937/55937/55937/55937/55937/55937/55937/55937/55937/55937/55937/55937/55937/55937/55937/55937/55…
REACTOME_ORC1_REMOVAL_FROM_CHROMATIN	REACTOME_ORC1_REMOVAL_FROM_CHROMATIN	70	0.591183	1.86952	6.17802e-05	0.00197413	0.00161684	4991	tags=64%, list=14%, signal=55%	8900/5698/5698/5698/5698/5698/5698/5698/5698/5698/5698/5698/5698/5698/5698/5698/5698/5698/5698/5698/5698/5698/5698/5698/5698/5698/5698/5698/5698/5698/5698/5698/5698/5698/5698/5698/5698/5698/5698/5698/5698/5696/5696/5696/5696/5696/5696/5696/5696/8454/5696/5696/5696/5696/5696/5696/5696/5696/5696/5696/5696/5696/5696/5696/5696/5696/5696/5696/5696/5696/5696/5696/5696/5696/5696/5696/5696/5696/5696/5696…
SATO_SILENCED_BY_DEACETYLATION_IN_PANCREATIC_CANCER	SATO_SILENCED_BY_DEACETYLATION_IN_PANCREATIC_CANCER	47	-0.675829	-1.93776	6.47878e-05	0.00202883	0.00166164	1949	tags=48%, list=5%, signal=45%	8913/284/374/10641/3006/4804/1006/5274/2069/24146/7351/133/5187/3621/10202/726/467/3162/9518/1028/1028/4616/3039
REACTOME_REGULATION_OF_RUNX3_EXPRESSION_AND_ACTIVITY	REACTOME_REGULATION_OF_RUNX3_EXPRESSION_AND_ACTIVITY	54	0.622224	1.8956	6.45833e-05	0.00202883	0.00166164	4991	tags=68%, list=14%, signal=59%	865/5698/5698/5698/5698/5698/5698/5698/5698/5698/5698/5698/5698/5698/5698/5698/5698/5698/5698/5698/5698/5698/5698/5698/5698/5698/5698/5698/5698/5698/5698/5698/5698/5698/5698/5698/5698/5698/5698/5698/5698/5696/5696/5696/5696/5696/5696/5696/5696/7040/1029/5696/5696/5696/5696/5696/5696/5696/5696/5696/5696/5696/5696/5696/5696/5696/5696/5696/5696/5696/5696/5696/5696/5696/5696/5696/5696/5696/5696/5696/…
REACTOME_DEFECTIVE_CFTR_CAUSES_CYSTIC_FIBROSIS	REACTOME_DEFECTIVE_CFTR_CAUSES_CYSTIC_FIBROSIS	60	0.603145	1.86924	6.41275e-05	0.00202883	0.00166164	4991	tags=52%, list=14%, signal=45%	5698/5698/5698/5698/5698/5698/5698/5698/5698/5698/5698/5698/5698/5698/5698/5698/5698/5698/5698/5698/5698/5698/5698/5698/5698/5698/5698/5698/5698/5698/5698/5698/5698/5698/5698/5698/5698/5698/5698/5698/5696/5696/5696/5696/5696/5696/5696/5696/91445/5696/5696/5696/5696/5696/5696/5696/5696/5696/5696/5696/5696/5696/5696/5696/5696/5696/5696/5696/5696/5696/5696/5696/5696/5696/5696/5696/5696/5696/5696/569…
MCLACHLAN_DENTAL_CARIES_UP	MCLACHLAN_DENTAL_CARIES_UP	257	0.416564	1.57234	6.47788e-05	0.00202883	0.00166164	6312	tags=13%, list=18%, signal=11%	1116/3117/3117/3117/3117/3117/3117/3117/3117/3117/3117/3117/3117/3117/3117/4256/3512/7305/23452/3553/5265/5265/10797/960/290/2212/5329/9086/360/1543/3117/3117/3117/3117/3117/3117/3117/3117/3117/3117/3117/3117/3117/3117/64231/51816/2745/771/25816/5450/7133/3394/939/2550/2550/2550/2550/2550/2550/2550/54855/629/629/629/629/629/629/629/4050/4050/4050/4050/4050/4050/4050/4050/330/728/8870/8870/8870/88…
SEIDEN_ONCOGENESIS_BY_MET	SEIDEN_ONCOGENESIS_BY_MET	89	0.542599	1.79141	6.73444e-05	0.0020984	0.00171861	8445	tags=60%, list=24%, signal=46%	8519/7358/114908/307/25800/10434/3188/10484/23471/8813/81542/253782/51765/4869/2773/6606/6606/6606/6606/6606/5500/3308/1917/5151/26135/2744/2926/6342/908/81688/54951/8634/8520/9403/3459/10096/29957/29957/51562/829/5033/27230/10923/220988/10787/8754/8754/6240/58486/10527/60496/7103/27249/54407/23365/10730/2059/54906/10054/2150/10412
WANG_CLIM2_TARGETS_DN	WANG_CLIM2_TARGETS_DN	176	0.458187	1.64854	6.83551e-05	0.00211934	0.00173577	7196	tags=42%, list=20%, signal=34%	92344/2624/6711/1174/54809/2161/51809/1616/1616/1616/1616/1616/1616/25898/9636/10109/440574/6924/3157/10484/8813/7332/51330/6856/842/64746/51136/84105/94134/10767/54442/29103/23528/3434/5917/1211/6102/23560/9673/5201/908/5978/8992/1616/1616/1616/1616/1616/1616/1616/1616/1616/1616/1616/1616/8178/80351/284996/6672/9140/51320/1616/1616/1616/1616/1616/1616/261726/55660/64963/136647/2193/10556/10153/9…
MIKKELSEN_MCV6_HCP_WITH_H3K27ME3	MIKKELSEN_MCV6_HCP_WITH_H3K27ME3	434	-0.394169	-1.47768	7.02277e-05	0.00216668	0.00177454	9594	tags=49%, list=27%, signal=36%	8927/3226/3788/140679/148641/5697/130733/1482/90187/4654/170302/374946/387856/10418/56301/51285/6338/2304/56033/9353/3785/3785/2911/10391/375612/54738/347741/9228/9228/9228/9228/9228/390598/64067/2257/3061/6529/5203/27022/84867/7045/6425/1296/114794/114794/150696/3761/56341/23349/176/64236/84929/10267/8022/10858/7482/64711/64711/2891/3640/83881/152/3786/81033/3645/6331/124842/362/6900/8291/79825/…
GESERICK_TERT_TARGETS_DN	GESERICK_TERT_TARGETS_DN	21	-0.796065	-1.92481	7.14955e-05	0.00219498	0.00179772	3088	tags=73%, list=9%, signal=67%	8870/8870/8870/8870/8870/8870/3726/1839/54206/687/9314/7071/8870/8870/8870/8870/8870/8870/8870/8870/8870/8870/8870/8870/8870/8870/8870/8870/8870/8870/8870/8870/8870/8870/8870/8870/7538/4616/7832/2354/10912
PELLICCIOTTA_HDAC_IN_ANTIGEN_PRESENTATION_DN	PELLICCIOTTA_HDAC_IN_ANTIGEN_PRESENTATION_DN	49	0.649984	1.96188	7.66125e-05	0.00234061	0.00191698	6009	tags=59%, list=17%, signal=50%	5698/5698/5698/5698/5698/5698/5698/5698/5698/5698/5698/5698/5698/5698/5698/5698/5698/5698/5698/5698/5698/5698/5698/5698/2923/5698/5698/5698/5698/5698/5698/5698/5698/5698/5698/5698/5698/5698/5698/5698/5698/6890/6890/6890/6890/6890/6890/6890/6890/5696/5696/5696/5696/5696/5696/5696/5696/6891/6891/6891/6891/6891/6891/6891/6891/3157/10130/6891/6891/6891/6891/6891/6891/6891/6891/6891/6891/6891/6891/689…
KEGG_FC_GAMMA_R_MEDIATED_PHAGOCYTOSIS	KEGG_FC_GAMMA_R_MEDIATED_PHAGOCYTOSIS	93	0.53533	1.78336	7.71001e-05	0.00234407	0.00191982	3027	tags=36%, list=8%, signal=33%	1794/5579/8611/7409/10092/4067/5294/27040/5788/5788/5788/5788/10095/10093/1072/10109/382/10810/10451/56848/8936/207/7408/65108/81873/6850/9846/10094/5604/5580/7410/8398/5880/5335/10000/10000
BENPORATH_ES_1	BENPORATH_ES_1	376	0.379503	1.48187	7.9412e-05	0.00240269	0.00196783	7370	tags=33%, list=21%, signal=26%	4257/10874/8519/51083/8611/4240/2118/2171/81539/6611/9456/51104/1789/7004/6566/6566/1075/55706/10434/79071/84101/142/55726/10157/51491/23683/81542/79647/7374/80775/84343/4074/6638/22800/25926/4869/57486/6297/993/57504/4277/4277/4277/4277/4277/4277/4277/4277/22929/548596/51704/7013/8577/7019/708/3308/1829/55920/55920/4913/9221/26135/9188/4175/7360/4947/4172/6426/6426/6741/23170/6423/55759/10036/22…
FLECHNER_BIOPSY_KIDNEY_TRANSPLANT_REJECTED_VS_OK_UP	FLECHNER_BIOPSY_KIDNEY_TRANSPLANT_REJECTED_VS_OK_UP	89	0.540757	1.78533	8.09408e-05	0.00243718	0.00199608	1899	tags=26%, list=5%, signal=24%	3936/8519/9535/1794/5579/1043/7805/10659/3566/3059/2171/11326/5788/5788/5788/5788/2752/10095/399/1675/1675/5696/5696/5696/5696/5696/5696/5696/5696/3134/3134/3134/3134/3134/3134/3134/3965/5937/3588/5696/5696/5696/5696/5696/5696/5696/5696/5696/5696/5696/5696/5696/5696/5696/5696/5696/5696/5696/5696/5696/5696/5696/5696/5696/5696/5696/5696/5696/5696/5696/5696/5696/5696/5696/5696/5696/5696/5696/5696
NUTT_GBM_VS_AO_GLIOMA_UP	NUTT_GBM_VS_AO_GLIOMA_UP	46	0.642743	1.90639	8.16605e-05	0.00244708	0.00200419	2311	tags=51%, list=6%, signal=48%	7431/2316/7805/4478/8905/2821/2821/3939/3939/1192/1192/1192/1192/1192/1192/1192/1635/1192/1192/1192/1192/1192/1192/1192/1192/1192/1192/1192/1192/1192/1192/1192/1192/1192/1192/1192/1192/1192/1192/1192/1192/1192/1192/1192/1192/1192/1192/1192/1192/1192/1192/1192/3134/3134/3134/3134/3134/3134/3134/11118/10487/79073/1650/81542/832/2590/51100/1192/1192/1192/1192/1192/1192/1192
BLANCO_MELO_COVID19_SARS_COV_2_LOW_MOI_INFECTION_A594_ACE2_EXPRESSING_CELLS_UP	BLANCO_MELO_COVID19_SARS_COV_2_LOW_MOI_INFECTION_A594_ACE2_EXPRESSING_CELLS_UP	142	-0.50348	-1.71264	8.39023e-05	0.00250229	0.0020494	3630	tags=24%, list=10%, signal=22%	23099/3106/3106/3106/3106/3106/3106/4804/4050/4050/4050/4050/4050/4050/4050/4050/6289/8870/8870/8870/8870/8870/8870/1195/3397/9852/57018/29841/8349/1746/3726/7087/128312/128312/23135/54891/54891/3665/3665/4792/2069/80149/9021/153222/2353/23764/51278/1649/1942/5187/3659/467/23645/7071/27113/57561/43/8870/8870/8870/8870/8870/8870/8870/8870/8870/8870/8870/8870/8870/8870/8870/8870/8870/8870/8870/8870…
SCHAEFFER_PROSTATE_DEVELOPMENT_6HR_DN	SCHAEFFER_PROSTATE_DEVELOPMENT_6HR_DN	460	0.359751	1.43734	8.43099e-05	0.00250252	0.0020496	6872	tags=35%, list=19%, signal=29%	9516/5315/463/389432/79026/84456/2624/377/6711/5216/216/5139/5019/728489/2771/23753/26523/9601/9249/7184/1465/57106/7873/1265/9500/396/10421/10755/58489/10675/840/144717/2820/10959/8683/51232/51232/23543/23543/3693/51107/83874/10226/7170/6697/11165/92799/283638/84445/9689/8204/55571/6595/148479/1108/5690/9774/51726/6418/51176/201965/9221/26155/64083/10189/10548/10548/1994/10513/3192/200081/84298/…
REACTOME_PLATELET_ACTIVATION_SIGNALING_AND_AGGREGATION	REACTOME_PLATELET_ACTIVATION_SIGNALING_AND_AGGREGATION	258	0.406033	1.53317	8.73426e-05	0.00258032	0.00211331	3915	tags=19%, list=11%, signal=17%	87/5579/2316/7114/3709/7409/5552/5216/7076/4067/5777/2769/5294/27040/54863/2771/2149/1675/1675/9564/9564/3937/1072/5588/1445/9948/54331/7873/7078/9749/10487/7423/5341/51571/7414/10451/7040/207/8525/967/10447/801/5770/2790/2776/2885/2782/2773/51097/5908/51368/3708/6850/2767/5580/7410/9002/3920/5880/3309/813/7534/351/7225/6678/1521/29789/6813/6813/5595/226
REACTOME_APC_C_MEDIATED_DEGRADATION_OF_CELL_CYCLE_PROTEINS	REACTOME_APC_C_MEDIATED_DEGRADATION_OF_CELL_CYCLE_PROTEINS	87	0.534802	1.75824	8.88875e-05	0.00261363	0.00214059	4991	tags=59%, list=14%, signal=51%	8900/5698/5698/5698/5698/5698/5698/5698/5698/5698/5698/5698/5698/5698/5698/5698/5698/5698/5698/5698/5698/5698/5698/5698/5698/5698/5698/5698/5698/5698/5698/5698/5698/5698/5698/5698/5698/5698/5698/5698/5698/5696/5696/5696/5696/5696/5696/5696/5696/7324/7321/8454/5696/5696/5696/5696/5696/5696/5696/5696/5696/5696/5696/5696/5696/5696/5696/5696/5696/5696/5696/5696/5696/5696/5696/5696/5696/5696/5696/5696…
WP_OXIDATIVE_PHOSPHORYLATION	WP_OXIDATIVE_PHOSPHORYLATION	60	0.597212	1.85085	9.18746e-05	0.00268883	0.00220219	9861	tags=74%, list=27%, signal=54%	4718/537/4708/522/518/4717/498/4706/4712/4707/10632/4537/4704/4702/506/517/10159/4725/56901/4722/4722/4710/4714/513/4731/9551/515/4715/4713/539/4541/4726/4508/4729/4698/4716/4720/4700/4700/4700/4700/4700/4700/4700/4700/4700/4700/4700/4700/4700/4700/4700/4723/4696/4696/4696/4696/4696/4696/4696/4696/4696/4696
REACTOME_INTERFERON_SIGNALING	REACTOME_INTERFERON_SIGNALING	201	0.437013	1.60726	9.41477e-05	0.00274254	0.00224618	1218	tags=6%, list=3%, signal=6%	3134/3134/3134/3134/3134/3134/3134/9021/10107/10107/10107/10107/10107/10107/10107/10107/3659/3134/3134/3134/3134/3134/3134/3134/10379/10379/3669/3134/3134/3134/3134/3134/3134/3134/3134/3134/3134/3134/3134/3134/3134/3134/3134/3134/3134/3134/3134/3134/816/10107/10107/10107/10107/10107/10107/10107/10107/10107/10107/10107/10107/10107/10107/10107/10107/10107/10107/10107/10107/10107/10107/10107/10107/1…
HU_ANGIOGENESIS_DN	HU_ANGIOGENESIS_DN	37	0.683992	1.9475	0.000100462	0.00289952	0.00237474	5685	tags=59%, list=16%, signal=50%	9452/56950/10473/2821/2821/8099/3181/3150/6418/2958/4175/9218/7764/4712/1665/5689/5689/3015/10480/310/4190/1615/23244
BOQUEST_STEM_CELL_CULTURED_VS_FRESH_UP	BOQUEST_STEM_CELL_CULTURED_VS_FRESH_UP	426	-0.387359	-1.45197	0.000100066	0.00289952	0.00237474	6572	tags=35%, list=18%, signal=29%	4857/10221/1645/5166/8639/8038/443/9252/55034/1116/1066/1066/9060/4256/90865/5730/2/2159/3337/5420/3304/3304/3304/3304/3304/23452/5209/1580/9787/65084/7049/3790/5176/5176/26137/10257/3601/960/2934/5069/54558/7474/7704/3303/3303/3303/3303/3303/1832/9022/2328/26585/26585/26585/140609/4600/3376/57730/32/862/1759/5549/55107/8140/10404/23637/8425/3479/6541/1193/81575/3725/2318/4660/3303/3303/3303/3303…
PUJANA_BRCA_CENTERED_NETWORK	PUJANA_BRCA_CENTERED_NETWORK	116	0.499042	1.71459	0.000101709	0.00292204	0.00239319	8650	tags=46%, list=24%, signal=35%	7919/7919/7919/7919/7919/7919/7919/7919/7919/7919/7919/7919/7919/7919/7919/7919/6776/7374/27309/1854/9128/4001/79621/5889/4175/6628/6627/167227/10036/8883/9125/5431/23173/11200/10212/5501/4436/2146/8914/3420/10606/9879/5527/10898/9837/4085/6626/23512/672/5591/1786/6240/5885/4605/7514/4690/7913/4849/4849/4849/4849/4849/4849/4849/4849/4849/4849/10051/7029/790/6117/4678/5111/9295/5422/6502/5965/8438…
BIOCARTA_HIVNEF_PATHWAY	BIOCARTA_HIVNEF_PATHWAY	55	0.61275	1.87408	0.00010567	0.00299824	0.0024556	5144	tags=35%, list=14%, signal=30%	397/71/7132/1616/1616/1616/1616/1616/1616/4214/840/6709/142/4790/84823/5062/8772/1676/4001/842/5664/317/5580/596/839/5663/331/1616/1616/1616/1616/1616/1616/1616/1616/1616/1616/1616/1616/9530/841/1616/1616/1616/1616/1616/1616/835/836/8737/7186
REACTOME_TCR_SIGNALING	REACTOME_TCR_SIGNALING	121	0.489428	1.69494	0.000105683	0.00299824	0.0024556	4991	tags=17%, list=14%, signal=15%	5698/5698/5698/5698/5698/5698/5698/5698/27040/5788/5788/5788/5788/5698/5698/5698/5698/5698/5698/5698/5698/5698/5698/5698/5698/5698/5698/5698/5698/5698/5698/5698/5698/5698/5698/5698/5698/5698/5698/5698/5698/5698/5698/5698/5698/3937/5588/1445/5696/5696/5696/5696/5696/5696/5696/5696/26191/7321/8454/7408/4790/5062/7334/10892/5696/5696/5696/5696/5696/5696/5696/5696/5696/5696/5696/5696/5696/5696/5696/5…
REACTOME_PROTEIN_LOCALIZATION	REACTOME_PROTEIN_LOCALIZATION	164	0.455054	1.63528	0.000105798	0.00299824	0.0024556	7019	tags=51%, list=20%, signal=42%	11001/54332/7416/5827/100272147/400916/400916/7321/10452/8604/122970/219743/23203/23600/8540/10440/5825/23417/7917/7917/7917/7917/7917/7917/7917/10952/10965/3416/2395/5191/9218/6342/498/118424/388753/7917/7917/7917/7917/7917/7917/7917/439/351/5264/92609/819/51287/224/8310/4358/26517/150274/29090/30/8504/56993/131474/390916/8799/6449/100188893/9868/2671/54677/401505/5192/26521/27230/29928/29928/29…
REACTOME_FCGAMMA_RECEPTOR_FCGR_DEPENDENT_PHAGOCYTOSIS	REACTOME_FCGAMMA_RECEPTOR_FCGR_DEPENDENT_PHAGOCYTOSIS	138	0.470839	1.66669	0.000109166	0.00307976	0.00252236	5958	tags=33%, list=17%, signal=28%	28797/3709/7409/71/10092/4067/7456/7525/10095/60/28815/10093/1072/10109/9844/4771/3071/10810/10097/10451/8936/2885/3708/6850/10094/5580/7410/8398/5335/919/63916/5595/84513/10768/7454/10096/28823/695/4627/10552/10006/5295/5336/3326/10787/998
REACTOME_AUF1_HNRNP_D0_BINDS_AND_DESTABILIZES_MRNA	REACTOME_AUF1_HNRNP_D0_BINDS_AND_DESTABILIZES_MRNA	54	0.612028	1.86454	0.000109835	0.00308473	0.00252643	4991	tags=60%, list=14%, signal=52%	5698/5698/5698/5698/5698/5698/5698/5698/5698/5698/5698/5698/5698/5698/5698/5698/5698/5698/5698/5698/5698/5698/5698/5698/5698/5698/5698/5698/5698/5698/5698/5698/5698/5698/5698/5698/5698/5698/5698/5698/5696/5696/5696/5696/5696/5696/5696/5696/5696/5696/5696/5696/5696/5696/5696/5696/5696/5696/5696/5696/5696/5696/5696/5696/5696/5696/5696/5696/5696/5696/5696/5696/5696/5696/5696/5696/5696/5696/5696/5696…
DESERT_EXTRACELLULAR_MATRIX_HEPATOCELLULAR_CARCINOMA_SUBCLASS_UP	DESERT_EXTRACELLULAR_MATRIX_HEPATOCELLULAR_CARCINOMA_SUBCLASS_UP	22	0.774193	1.93516	0.000113731	0.00317991	0.00260439	2834	tags=41%, list=8%, signal=38%	2200/288/5480/2182/56667/51097/51635/2744/3309
WP_EBOLA_VIRUS_INFECTION_IN_HOST	WP_EBOLA_VIRUS_INFECTION_IN_HOST	129	0.488368	1.7062	0.000114728	0.00319353	0.00261554	6163	tags=11%, list=17%, signal=10%	87/2316/71/2317/4240/8826/57617/9641/3385/60/3133/3133/3133/3133/3133/3133/3133/3133/3133/3133/3133/3133/3133/3133/3133/3133/3133/3133/3133/3133/3133/3133/3133/3133/3133/3133/3133/3133/3134/3134/3134/3134/3134/3134/3134/5922/207/4790/558/3384/7879/3107/3107/3107/3107/3107/3107/3107/708/7301/7410/5868/1211/3685/9367/1965/684/5610/3105/3105/3105/3105/3105/3105/3105/3105/1212/3565/858/23586/5595/310…
WANG_TUMOR_INVASIVENESS_DN	WANG_TUMOR_INVASIVENESS_DN	206	0.425683	1.57612	0.000117046	0.00324363	0.00265657	6769	tags=44%, list=19%, signal=36%	9516/1439/3936/4061/4061/4478/7358/10659/8826/2760/23344/2771/144097/9249/23420/23420/9948/307/4214/10927/10097/3188/83874/7170/84326/3654/3028/567/567/2782/8872/7332/5500/4242/9373/9801/9329/5580/64216/84172/81875/9218/3488/84962/27347/7534/50999/1665/3603/4893/9265/5689/5689/4358/57157/51188/88455/27101/6421/1050/10131/7411/334/5826/60560/90806/8666/665/7267/29927/2665/8455/80195/1615/5527/1215…
BURTON_ADIPOGENESIS_8	BURTON_ADIPOGENESIS_8	80	0.539975	1.74653	0.000117606	0.00324479	0.00265752	4418	tags=37%, list=12%, signal=32%	822/123920/4478/9168/53827/51186/2149/1616/1616/1616/1616/1616/1616/5269/7105/10549/6709/10487/11015/7414/2629/2629/2790/2782/23326/83892/3920/3685/9261/54458/351/1616/1616/1616/1616/1616/1616/1616/1616/1616/1616/1616/1616/678/1616/1616/1616/1616/1616/1616/157769
YAO_TEMPORAL_RESPONSE_TO_PROGESTERONE_CLUSTER_11	YAO_TEMPORAL_RESPONSE_TO_PROGESTERONE_CLUSTER_11	100	0.51943	1.74662	0.000120294	0.0033044	0.00270634	7442	tags=54%, list=21%, signal=43%	4925/7184/7873/92906/84365/10130/692312/11171/84946/1184/51726/10197/8678/9188/84916/84916/55379/3309/51154/6723/56902/9455/29078/128/55720/10713/26354/4686/9790/84549/55829/51602/80324/1434/86/10528/3838/8854/29098/3607/3091/10237/51593/10963/10483/23246/23246/5962/117246/9933/64118/23212/6059/10527/6428/2935/54205/10670
UDAYAKUMAR_MED1_TARGETS_DN	UDAYAKUMAR_MED1_TARGETS_DN	237	-0.439139	-1.57951	0.000122852	0.00335993	0.00275182	6118	tags=34%, list=17%, signal=28%	50854/50854/50854/50854/50854/50854/50854/50854/50854/50854/6480/5914/50854/50854/50854/50854/50854/6456/7168/7290/3977/23612/8503/23022/50854/50854/50854/50854/50854/2934/55818/6484/10124/1643/11152/10724/4779/4330/54145/355/2273/7378/6616/6525/55761/6046/6046/6046/6046/6046/6046/6046/3006/115/1390/3783/55890/1368/2355/26959/26959/23117/5116/9231/9231/27129/22863/7389/79970/25841/9821/868/3726/6…
SENESE_HDAC2_TARGETS_UP	SENESE_HDAC2_TARGETS_UP	111	0.502921	1.72217	0.000129805	0.00353463	0.00289491	6760	tags=44%, list=19%, signal=36%	6947/865/3576/23516/8826/118429/7048/5339/5328/9180/6566/6566/51107/23333/2004/54619/10440/4664/9774/3998/1660/5878/5829/8091/5868/11198/8942/8795/79982/201562/51762/7175/6447/6447/6447/56990/10600/5725/4507/79572/9404/9732/4170/444/6830/10135/11325/200734/55681/8773/1314
LINDGREN_BLADDER_CANCER_CLUSTER_2B	LINDGREN_BLADDER_CANCER_CLUSTER_2B	385	0.370323	1.45662	0.000137393	0.00372506	0.00305087	3584	tags=15%, list=10%, signal=14%	9452/3936/8519/1794/9672/284119/10788/375057/1043/3087/7805/4478/30011/8530/64092/10659/3490/57580/5552/3561/10581/8905/5899/51338/3956/5778/309/217/29091/399/50861/64781/1266/25939/3937/83758/83758/1465/55843/91607/10109/3133/3133/3133/3133/3133/3133/3133/3133/3133/3133/3133/3133/3133/3133/3133/3133/3133/3133/3133/3133/3133/3133/3133/3133/3133/3133/3133/3133/8835/2669/55640/9466/9466/719/3157/80…
TAKEDA_TARGETS_OF_NUP98_HOXA9_FUSION_16D_UP	TAKEDA_TARGETS_OF_NUP98_HOXA9_FUSION_16D_UP	172	0.435617	1.5677	0.000144665	0.00390533	0.00319851	2770	tags=13%, list=8%, signal=12%	3248/3976/946/7177/387882/6526/8519/4061/4061/9840/8900/2317/284367/129607/7490/81539/1675/1675/25939/3815/9636/2669/6659/79071/51107/5573/57447/196/23596/23596/27197/3212/3434/85414
MIKKELSEN_IPS_ICP_WITH_H3K4ME3_AND_H327ME3	MIKKELSEN_IPS_ICP_WITH_H3K4ME3_AND_H327ME3	125	-0.499135	-1.67602	0.000151384	0.00406918	0.00333271	861	tags=11%, list=2%, signal=11%	7409/53827/3133/3133/3133/3133/3133/3133/3133/3133/3133/3133/3133/3133/3133/3133/3133/3133/3133/3133/3133/3133/3133/3133/3133/3133/3133/3133/3133/3133/943
ALONSO_METASTASIS_UP	ALONSO_METASTASIS_UP	191	0.43493	1.59156	0.000155077	0.00415063	0.00339942	6861	tags=39%, list=19%, signal=32%	865/9173/5216/7048/10581/51186/2023/196527/205/6281/7416/1462/1102/84275/55179/84520/84520/967/4602/56945/9741/2885/9689/2739/5573/3988/6418/1829/1603/4236/7520/3416/51643/3685/147007/25879/8574/4706/4043/5511/55651/26128/54499/34/6678/8491/29088/22948/59286/56647/5376/51728/267020/7411/22919/334/25923/8854/4190/113444/8836/988/4709/92689/10606/1351/5936/3312/5527/5901/158/6392/5516/4831/118487/3…
THUM_SYSTOLIC_HEART_FAILURE_UP	THUM_SYSTOLIC_HEART_FAILURE_UP	410	0.366231	1.44503	0.000157059	0.00418578	0.0034282	3470	tags=12%, list=10%, signal=11%	397/27306/1520/3936/1794/9672/1043/7805/71/4240/5552/56907/100506144/4067/3561/7048/2023/5899/11326/5294/51338/8659/5788/5788/5788/5788/60/4149/1266/7184/9948/56034/307/4853/4033/6566/6566/8835/396/154043/3916/51313/11118/382/192670/1075/10959/1462/719/586/10097/10130/3140/8673/22920/4074/27336/8436/10857/4664/6856/5825/9774/3308/3998/3275/7430/2271/65080/22916/5868/2124/5880/57507/79184/813/2723…
BIOCARTA_PROTEASOME_PATHWAY	BIOCARTA_PROTEASOME_PATHWAY	18	0.798628	1.91168	0.000158333	0.00420186	0.00344138	6595	tags=95%, list=18%, signal=77%	7317/6185/5690/5684/6184/5685/5688/5689/5689/5683/5687/5695/5694/5686/7337/5693/7319/5682
JOHNSTONE_PARVB_TARGETS_3_UP	JOHNSTONE_PARVB_TARGETS_3_UP	423	0.359841	1.42218	0.000161163	0.00425893	0.00348812	2355	tags=15%, list=7%, signal=14%	301/7431/3976/9516/4257/1520/8519/79026/123920/8635/2316/2034/1435/65061/2317/5836/6711/8826/7076/85461/7048/57617/4681/53827/5698/5698/5698/5698/5698/5698/5698/5698/1471/2889/5698/5698/5698/5698/5698/5698/5698/5698/10095/60/5698/5698/5698/5698/5698/5698/5698/5698/84293/23043/9371/79180/5698/5698/5698/5698/5698/5698/5698/5698/5698/5698/5698/5698/5698/5698/5698/5698/25939/5328/9761/9180/307/4853/3…
REACTOME_FCERI_MEDIATED_CA_2_MOBILIZATION	REACTOME_FCERI_MEDIATED_CA_2_MOBILIZATION	82	0.542947	1.76915	0.000162658	0.00428037	0.00350568	5104	tags=29%, list=14%, signal=25%	2206/28797/3709/7409/4067/27040/28815/3937/5530/10451/801/2885/3708/6850/7294/4772/7410/5335/4775/10768/2207/28823/695/5534
WATANABE_RECTAL_CANCER_RADIOTHERAPY_RESPONSIVE_DN	WATANABE_RECTAL_CANCER_RADIOTHERAPY_RESPONSIVE_DN	92	0.51557	1.71441	0.000163437	0.00428286	0.00350771	5699	tags=30%, list=16%, signal=25%	301/822/87/2316/837/4067/3956/2950/29/29/29/5584/10484/8454/23370/23471/6697/4277/4277/4277/4277/4277/4277/4277/4277/8570/2746/1829/10430/7301/5880/3685/1176/10557/908/5515/9140/4839/5687/5955/3336/8030/5694/22795/4134/8837/5723/5527
REACTOME_REGULATION_OF_PTEN_STABILITY_AND_ACTIVITY	REACTOME_REGULATION_OF_PTEN_STABILITY_AND_ACTIVITY	68	0.570923	1.80433	0.000169651	0.00442718	0.00362592	6031	tags=62%, list=17%, signal=52%	5698/5698/5698/5698/5698/5698/5698/5698/5698/5698/5698/5698/5698/5698/5698/5698/5698/5698/5698/5698/5698/5698/5698/5698/5698/5698/5698/5698/5698/5698/5698/5698/5698/5698/5698/5698/5698/5698/5698/5698/5696/5696/5696/5696/5696/5696/5696/5696/207/5987/5987/5987/5987/5987/5987/5987/5696/5696/5696/5696/5696/5696/5696/5696/5696/5696/5696/5696/5696/5696/5696/5696/5696/5696/5696/5696/5696/5696/5696/5696/…
BIOCARTA_TNFR1_PATHWAY	BIOCARTA_TNFR1_PATHWAY	29	0.716544	1.9218	0.000171128	0.0044472	0.00364231	6665	tags=23%, list=19%, signal=19%	397/7132/4214/6709/142/84823/5062/8772/1676/4001/8567/9530/841/6885/835/836/8737/7186/4000/5591/1677
REACTOME_ANTIVIRAL_MECHANISM_BY_IFN_STIMULATED_GENES	REACTOME_ANTIVIRAL_MECHANISM_BY_IFN_STIMULATED_GENES	81	0.549882	1.78345	0.00017466	0.00452023	0.00370212	7736	tags=49%, list=22%, signal=38%	2316/2317/9636/7324/55706/3837/7334/9775/3434/5335/8672/23636/5610/9883/23586/5595/7175/9631/23279/1981/201626/3716/10762/3838/5903/6041/8480/317649/23165/11274/9972/6059/5495/3840/5300/3661/55746/8638/79023/6396
REACTOME_SYNTHESIS_OF_DNA	REACTOME_SYNTHESIS_OF_DNA	119	0.489459	1.68911	0.000177642	0.00455972	0.00373446	4991	tags=53%, list=14%, signal=46%	8900/5698/5698/5698/5698/5698/5698/5698/5698/5698/5698/5698/5698/5698/5698/5698/5698/5698/5698/5698/5698/5698/5698/5698/5698/5698/5698/5698/5698/5698/5698/5698/5698/5698/5698/5698/5698/5698/5698/5698/5698/5696/5696/5696/5696/5696/5696/5696/5696/7324/7321/8454/5696/5696/5696/5696/5696/5696/5696/5696/5696/5696/5696/5696/5696/5696/5696/5696/5696/5696/5696/5696/5696/5696/5696/5696/5696/5696/5696/5696…
GOLDRATH_HOMEOSTATIC_PROLIFERATION	GOLDRATH_HOMEOSTATIC_PROLIFERATION	148	0.474735	1.68823	0.000176986	0.00455972	0.00373446	7353	tags=48%, list=20%, signal=38%	7456/138151/440574/2710/7324/81552/3588/84365/6635/51491/7374/3654/64841/3703/4116/55969/4708/6418/522/84105/1660/5878/596/4830/4717/5464/11315/4706/55651/9532/351/3652/10505/59286/55536/11200/5860/27101/6421/3336/140735/5887/10360/9270/7417/4709/29928/29928/29928/94081/81555/64432/11333/9555/26355/5705/5578/10728/5134/10618/2876/51075/5634/53981/23741/10527/3267/51321/133015/6093/142679/6391/542…
NGO_MALIGNANT_GLIOMA_1P_LOH	NGO_MALIGNANT_GLIOMA_1P_LOH	15	0.837167	1.92037	0.000178609	0.00456583	0.00373947	3200	tags=73%, list=9%, signal=67%	7431/7171/2023/7170/3925/2597/5230/1892/3309/11315/302
REACTOME_PARASITE_INFECTION	REACTOME_PARASITE_INFECTION	111	0.497419	1.70333	0.000180618	0.00459841	0.00376615	5335	tags=29%, list=15%, signal=25%	28797/7409/71/10092/4067/7456/7525/10095/60/28815/10093/10109/9844/3071/10810/10097/10451/8936/2885/6850/10094/7410/919/63916/5595/7454/10096/28823/695/4627/10552/10006
CONCANNON_APOPTOSIS_BY_EPOXOMICIN_UP	CONCANNON_APOPTOSIS_BY_EPOXOMICIN_UP	234	-0.44035	-1.58661	0.000186515	0.00472932	0.00387337	6555	tags=36%, list=18%, signal=30%	1645/4277/4277/4277/4277/4277/4277/4277/4277/3679/4277/4277/4277/4277/4277/4277/4277/4277/4130/8675/3337/10043/8644/26018/23022/960/55957/79703/9586/360/6498/8233/23313/3303/3303/3303/3303/3303/64061/355/6016/59/7378/1307/8140/7556/4051/6541/4924/5590/23352/3725/2318/1054/3303/3303/3303/3303/3303/1390/905/1837/10018/26580/11080/6520/716/23049/3303/3303/3303/3303/3303/2035/9263/1491/6560/493/8492/…
GRABARCZYK_BCL11B_TARGETS_UP	GRABARCZYK_BCL11B_TARGETS_UP	77	0.552012	1.77224	0.000187288	0.00472977	0.00387374	6172	tags=49%, list=17%, signal=41%	22807/79026/7076/155066/205/3956/1728/340061/340061/23299/84101/54103/51765/100505687/54462/8540/6275/55686/9697/340481/116150/9467/6197/302/8615/84725/1236/1521/10559/5376/7307/3716/5551/55670/5295/202/10015/5962/153339
SWEET_LUNG_CANCER_KRAS_UP	SWEET_LUNG_CANCER_KRAS_UP	474	0.351979	1.40851	0.000191855	0.00482565	0.00395226	2650	tags=13%, list=7%, signal=13%	9516/5315/1439/1520/3936/7171/87/1512/8635/3087/7805/1535/3709/81618/3566/6646/8826/288/51186/2023/2821/2821/8573/3939/3939/4925/84293/1192/1192/1192/1192/1192/1192/1192/1192/1192/1192/1192/1192/1192/1192/1192/1192/1192/1192/1192/1192/1192/1192/1192/1192/1192/1192/1192/1192/1192/1192/1192/1192/1192/1192/1192/1192/1192/1192/1192/1192/1192/1192/5092/2182/5355/9761/3099/307/7873/6566/6566/51280/8835…
REACTOME_THE_CITRIC_ACID_TCA_CYCLE_AND_RESPIRATORY_ELECTRON_TRANSPORT	REACTOME_THE_CITRIC_ACID_TCA_CYCLE_AND_RESPIRATORY_ELECTRON_TRANSPORT	177	0.445621	1.60583	0.000193887	0.00485725	0.00397815	9861	tags=61%, list=27%, signal=44%	3939/3939/4718/7416/6566/6566/4199/51241/3945/2739/55863/4708/51660/522/518/54704/6341/2271/4717/79133/498/4513/4706/51103/4514/4712/51204/10128/4707/6390/4509/7388/29078/3419/10632/4537/4200/51079/7386/4704/1737/4191/9377/8801/1345/51300/51295/1353/27089/10131/91942/1738/7384/285521/4702/55967/3420/4709/506/1337/517/1351/4725/4722/4722/6392/4710/509/4694/6389/4714/513/1327/54539/4731/23539/9551/…
ZHAN_MULTIPLE_MYELOMA_HP_DN	ZHAN_MULTIPLE_MYELOMA_HP_DN	45	0.636576	1.87324	0.000197941	0.00492818	0.00403624	5245	tags=51%, list=15%, signal=44%	1043/139818/7076/8905/1471/5355/51063/56521/5937/8879/9466/9466/10130/2629/2629/23596/23596/6275/55154/123803/123803/1979/23596/23596/10732/54518/8407
CHEN_LVAD_SUPPORT_OF_FAILING_HEART_UP	CHEN_LVAD_SUPPORT_OF_FAILING_HEART_UP	102	-0.520239	-1.68992	0.000198292	0.00492818	0.00403624	3576	tags=35%, list=10%, signal=32%	3725/2318/10272/2355/7504/7763/6450/185/3912/23580/8736/27254/1051/687/54541/4792/3775/4239/8660/28984/51278/1191/5187/467/10628/2309/3491/800/7538/1026/25840/4616/1831/7832/10912/604
NOUZOVA_TRETINOIN_AND_H4_ACETYLATION	NOUZOVA_TRETINOIN_AND_H4_ACETYLATION	133	0.468921	1.64482	0.000200839	0.00495219	0.0040559	8708	tags=42%, list=24%, signal=32%	92344/7919/7919/7919/7919/7919/7919/7919/7919/10269/10093/79594/7919/7919/7919/7919/7919/7919/7919/7919/11164/10487/25917/79720/7673/10775/8872/128866/78996/5684/25871/25978/29922/6832/58485/28985/28985/8546/318/87178/56254/57337/4358/79801/9631/5687/7572/9967/10474/162966/7746/23211/81545/113130/51126/1209/28990/5915/55101/22913/9352/5000/6499/6499/6499/6499/6499/6499/284370/55280/2011/10483/570…
BURTON_ADIPOGENESIS_6	BURTON_ADIPOGENESIS_6	193	0.416863	1.52398	0.00020044	0.00495219	0.0040559	6468	tags=38%, list=18%, signal=31%	4257/100996928/216/84293/1675/1675/2653/873/5827/4056/4056/4199/51571/7905/80777/7284/3945/8436/9094/19/348/5525/51144/55276/4708/5664/3033/26275/8398/211/1652/1652/1652/29103/2395/4717/6342/594/51258/587/221545/221545/221545/221545/221545/221545/221545/33/4712/6390/83549/2194/54884/1666/901/3614/57136/4704/1737/1717/57157/30/5860/221545/221545/221545/221545/221545/221545/221545/221545/221545/221…
HAHTOLA_MYCOSIS_FUNGOIDES_CD4_DN	HAHTOLA_MYCOSIS_FUNGOIDES_CD4_DN	114	0.487056	1.66925	0.000202924	0.00498396	0.00408193	7504	tags=54%, list=21%, signal=43%	87/4925/114908/4065/7163/3937/969/120/975/5037/801/26003/23370/10892/3384/1964/1854/3895/708/10492/114882/3275/471/6642/51439/23484/29789/3796/9140/5955/27101/1353/9270/64710/9669/10606/7267/8697/51019/202/220988/11052/23157/130872/998/11222/6047/9939/26355/64062/8886/5885/58486/6059/10527/27292/54910/3094/6777/2935/23435/64848/23080
RIEGE_DELTANP63_DIRECT_TARGETS_UP	RIEGE_DELTANP63_DIRECT_TARGETS_UP	135	0.471299	1.65608	0.000208532	0.0051017	0.00417836	4632	tags=32%, list=13%, signal=28%	397/3628/3566/4090/2171/2769/2760/3340/205/7525/9638/23682/55612/81786/2950/6949/4323/56882/7040/375449/10892/83879/8061/7371/3265/3265/30844/55686/5889/10953/8091/84916/84916/4172/10036/79812/6749/678/55720/115825/9771/10228/8601/2319/9319
REACTOME_REGULATION_OF_RUNX2_EXPRESSION_AND_ACTIVITY	REACTOME_REGULATION_OF_RUNX2_EXPRESSION_AND_ACTIVITY	72	0.555467	1.76027	0.000211724	0.00515963	0.0042258	4991	tags=63%, list=14%, signal=54%	865/5698/5698/5698/5698/5698/5698/5698/5698/5698/5698/5698/5698/5698/5698/5698/5698/5698/5698/5698/5698/5698/5698/5698/5698/5698/5698/5698/5698/5698/5698/5698/5698/5698/5698/5698/5698/5698/5698/5698/5698/5696/5696/5696/5696/5696/5696/5696/5696/8454/5696/5696/5696/5696/5696/5696/5696/5696/5696/5696/5696/5696/5696/5696/5696/5696/5696/5696/5696/5696/5696/5696/5696/5696/5696/5696/5696/5696/5696/5696/…
REACTOME_DEGRADATION_OF_AXIN	REACTOME_DEGRADATION_OF_AXIN	54	0.598242	1.82254	0.000212727	0.00516399	0.00422937	4991	tags=68%, list=14%, signal=58%	5698/5698/5698/5698/5698/5698/5698/5698/5698/5698/5698/5698/5698/5698/5698/5698/5698/5698/5698/5698/5698/5698/5698/5698/5698/5698/5698/5698/5698/5698/5698/5698/5698/5698/5698/5698/5698/5698/5698/5698/5696/5696/5696/5696/5696/5696/5696/5696/5696/5696/5696/5696/5696/5696/5696/5696/5696/5696/5696/5696/5696/5696/5696/5696/5696/5696/5696/5696/5696/5696/5696/5696/5696/5696/5696/5696/5696/5696/5696/5696…
BRACHAT_RESPONSE_TO_METHOTREXATE_DN	BRACHAT_RESPONSE_TO_METHOTREXATE_DN	26	0.746433	1.91891	0.000216753	0.00523454	0.00428715	4464	tags=61%, list=12%, signal=53%	84034/10581/2023/2821/2821/205/307/6776/3157/2597/26578/596/2287/226/5478/100529144/100529144
TORCHIA_TARGETS_OF_EWSR1_FLI1_FUSION_TOP20_DN	TORCHIA_TARGETS_OF_EWSR1_FLI1_FUSION_TOP20_DN	19	0.783407	1.89761	0.000217807	0.00523454	0.00428715	2053	tags=53%, list=6%, signal=50%	9168/3956/51809/1266/55843/6659/975/26227/23683/55619
REACTOME_CLASS_I_MHC_MEDIATED_ANTIGEN_PROCESSING_PRESENTATION	REACTOME_CLASS_I_MHC_MEDIATED_ANTIGEN_PROCESSING_PRESENTATION	376	0.369915	1.44443	0.000218141	0.00523454	0.00428715	6031	tags=40%, list=17%, signal=35%	4689/4689/1520/55819/1535/79754/5698/5698/5698/5698/5698/5698/5698/5698/64219/5698/5698/5698/5698/5698/5698/5698/5698/5698/5698/5698/5698/5698/5698/5698/5698/91694/91694/2923/22954/25898/5698/5698/5698/5698/5698/5698/5698/5698/5698/5698/5698/5698/5698/5698/5698/5698/7325/3133/3133/3133/3133/3133/3133/3133/3133/3133/3133/3133/3133/3133/3133/3133/3133/3133/3133/3133/3133/3133/3133/3133/3133/3133/31…
REACTOME_CDT1_ASSOCIATION_WITH_THE_CDC6_ORC_ORIGIN_COMPLEX	REACTOME_CDT1_ASSOCIATION_WITH_THE_CDC6_ORC_ORIGIN_COMPLEX	58	0.591516	1.81495	0.000233767	0.00554577	0.00454206	4991	tags=65%, list=14%, signal=57%	5698/5698/5698/5698/5698/5698/5698/5698/5698/5698/5698/5698/5698/5698/5698/5698/5698/5698/5698/5698/5698/5698/5698/5698/5698/5698/5698/5698/5698/5698/5698/5698/5698/5698/5698/5698/5698/5698/5698/5698/5696/5696/5696/5696/5696/5696/5696/5696/5696/5696/5696/5696/5696/5696/5696/5696/5696/5696/5696/5696/5696/5696/5696/5696/5696/5696/5696/5696/5696/5696/5696/5696/5696/5696/5696/5696/5696/5696/5696/5696…
REACTOME_SIGNALING_BY_VEGF	REACTOME_SIGNALING_BY_VEGF	105	0.497935	1.68942	0.000232724	0.00554577	0.00454206	6267	tags=45%, list=17%, signal=38%	4689/4689/5579/1535/3709/7409/71/6300/60/9564/9564/9844/3071/10810/7423/10451/8936/207/801/5600/5062/558/5567/3265/3265/3708/79109/5580/7410/5829/3685/5335/9261/10000/10000/117145/63916/4893/10768/1499/387/4846/14/10006/5295/2475/10787/998/7867/5879
MATTIOLI_MGUS_VS_PCL	MATTIOLI_MGUS_VS_PCL	123	0.468453	1.62159	0.000233293	0.00554577	0.00454206	4888	tags=35%, list=14%, signal=30%	28797/26228/2034/3576/55353/203068/203068/203068/203068/203068/203068/203068/203068/5216/7919/7919/7919/7919/7919/7919/7919/7919/2023/23344/28815/7919/7919/7919/7919/7919/7919/7919/7919/7317/142/567/567/8772/22929/90861/5684/11151/4175/6426/6426/3185/23636/6636/3704/54512/6597/5710/9238/8943/7203/203068/203068/203068/203068/203068/203068/203068/203068/203068/203068/203068/203068/203068/203068/203…
WP_PROSTAGLANDIN_SYNTHESIS_AND_REGULATION	WP_PROSTAGLANDIN_SYNTHESIS_AND_REGULATION	45	0.629406	1.85214	0.000248422	0.00587119	0.00480858	807	tags=17%, list=2%, signal=17%	3248/301/27306/231/6281/309/307/873
REACTOME_STABILIZATION_OF_P53	REACTOME_STABILIZATION_OF_P53	56	0.584139	1.78226	0.000252295	0.00594031	0.00486519	4991	tags=67%, list=14%, signal=58%	5698/5698/5698/5698/5698/5698/5698/5698/5698/5698/5698/5698/5698/5698/5698/5698/5698/5698/5698/5698/5698/5698/5698/5698/5698/5698/5698/5698/5698/5698/5698/5698/5698/5698/5698/5698/5698/5698/5698/5698/5696/5696/5696/5696/5696/5696/5696/5696/1029/5696/5696/5696/5696/5696/5696/5696/5696/5696/5696/5696/5696/5696/5696/5696/5696/5696/5696/5696/5696/5696/5696/5696/5696/5696/5696/5696/5696/5696/5696/5696…
FLECHNER_PBL_KIDNEY_TRANSPLANT_REJECTED_VS_OK_UP	FLECHNER_PBL_KIDNEY_TRANSPLANT_REJECTED_VS_OK_UP	63	0.575767	1.80057	0.000256634	0.00599738	0.00491193	5064	tags=49%, list=14%, signal=42%	9516/9452/4067/1616/1616/1616/1616/1616/1616/5355/1022/1022/307/9138/9781/3705/3705/1059/142/7905/10951/567/567/3384/2806/961/7520/4175/92140/9789/10972/1616/1616/1616/1616/1616/1616/1616/1616/1616/1616/1616/1616/10611/4358/1616/1616/1616/1616/1616/1616/9110/81611/545/9533/10554/10554/10554/10554/10554/10554/10554/10554/10554/10554/10554/10554/10554/10554/10213/3838
GINESTIER_BREAST_CANCER_ZNF217_AMPLIFIED_DN	GINESTIER_BREAST_CANCER_ZNF217_AMPLIFIED_DN	324	0.380969	1.46696	0.000255699	0.00599738	0.00491193	7610	tags=39%, list=21%, signal=31%	29890/7919/7919/7919/7919/7919/7919/7919/7919/54520/92154/23151/23258/9826/7916/7916/7916/7916/7916/7916/7916/23616/55784/7004/2968/2968/2968/2968/2968/2968/7919/7919/7919/7919/7919/7919/7919/7919/7205/7005/6949/8645/10919/10919/10919/10919/10919/10919/10919/80774/56882/100131017/56848/9463/199953/56919/116225/5600/2068/1454/5496/2280/10919/10919/10919/10919/10919/10919/10919/10919/10919/10919/10…
FUJII_YBX1_TARGETS_DN	FUJII_YBX1_TARGETS_DN	192	0.422765	1.54716	0.000259532	0.00604256	0.00494893	6217	tags=34%, list=17%, signal=28%	2316/5019/2171/1627/11270/11270/11270/11270/11270/11270/11270/1836/81034/7078/6941/6941/6941/6941/6941/6941/6941/3682/57045/7374/10951/83879/993/4277/4277/4277/4277/4277/4277/4277/4277/1854/1676/4001/29101/3708/10962/3033/3191/3191/22916/4175/4172/813/80742/80742/80742/80742/80742/80742/80742/10036/23636/11130/2237/1979/9532/6749/5611/26147/10459/7852/22948/5140/9538/6941/6941/6941/6941/6941/6941…
REACTOME_RHOBTB_GTPASE_CYCLE	REACTOME_RHOBTB_GTPASE_CYCLE	35	0.664829	1.8747	0.000265039	0.00614792	0.00503522	880	tags=20%, list=2%, signal=20%	7431/87/71/7919/7919/7919/7919/7919/7919/7919/7919/1627/7919/7919/7919/7919/7919/7919/7919/7919
BLANCO_MELO_RESPIRATORY_SYNCYTIAL_VIRUS_INFECTION_A594_CELLS_DN	BLANCO_MELO_RESPIRATORY_SYNCYTIAL_VIRUS_INFECTION_A594_CELLS_DN	110	-0.512827	-1.68591	0.000275867	0.00637547	0.00522159	8383	tags=28%, list=23%, signal=22%	55715/4703/340390/91409/8537/259/3851/4987/4987/286133/2006/63924/27239/168002/643669/643669/3767/222962/312/2261/1365/54492/55065/90113/147011/10083/66002/113220/5345/5345/360/6519/401262/4151/90288/350/29070/2049/5625/5625/9963/4050/4050/4050/4050/4050/4050/4050/4050/80164/150244/23546/727/4059/57715/3026/11092/56953/23263/55806/1870/1870/4640/2264/85004/79574/122622/727897/1159/5909
REACTOME_ANTIGEN_PRESENTATION_FOLDING_ASSEMBLY_AND_PEPTIDE_LOADING_OF_CLASS_I_MHC	REACTOME_ANTIGEN_PRESENTATION_FOLDING_ASSEMBLY_AND_PEPTIDE_LOADING_OF_CLASS_I_MHC	25	0.733325	1.8777	0.000281756	0.0064763	0.00530417	6009	tags=43%, list=17%, signal=37%	2923/3133/3133/3133/3133/3133/3133/3133/3133/3133/3133/3133/3133/3133/3133/3133/3133/3133/3133/3133/3133/3133/3133/3133/3133/3133/3133/3133/3133/6890/6890/6890/6890/6890/6890/6890/6890/6891/6891/6891/6891/6891/6891/6891/6891/3134/3134/3134/3134/3134/3134/3134/6891/6891/6891/6891/6891/6891/6891/6891/10484/6891/6891/6891/6891/6891/6891/6891/6891/6891/6891/6891/6891/6891/6891/6891/6891/567/567/6891/…
REACTOME_S_PHASE	REACTOME_S_PHASE	161	0.444301	1.5852	0.000282298	0.0064763	0.00530417	6031	tags=53%, list=17%, signal=45%	8900/1875/5698/5698/5698/5698/5698/5698/5698/5698/5698/5698/5698/5698/5698/5698/5698/5698/5698/5698/5698/5698/5698/5698/5698/5698/4149/5698/5698/5698/5698/5698/5698/5698/5698/5698/5698/5698/5698/5698/5698/5698/5698/1022/1022/5696/5696/5696/5696/5696/5696/5696/5696/7324/7321/207/8454/5696/5696/5696/5696/5696/5696/5696/5696/5696/5696/5696/5696/5696/5696/5696/5696/5696/5696/5696/5696/5696/5696/5696/…
TONKS_TARGETS_OF_RUNX1_RUNX1T1_FUSION_HSC_DN	TONKS_TARGETS_OF_RUNX1_RUNX1T1_FUSION_HSC_DN	190	0.427862	1.56248	0.000283815	0.00648735	0.00531322	4649	tags=19%, list=13%, signal=17%	3487/1439/822/4689/4689/4744/87/1043/3581/7805/2624/1435/8611/8530/64110/8900/51411/28638/11001/5026/3574/3956/27040/399/6688/5553/3937/5355/3732/7078/7005/8645/26191/8536/9046/6285/79071/80150/595/9920/9920/126208/6275/5580/9391/3488/55911/54512/1053/54941/9834/9834/1236/678/7852/83442/5376/1050/113/2319/23064/863
REACTOME_DECTIN_1_MEDIATED_NONCANONICAL_NF_KB_SIGNALING	REACTOME_DECTIN_1_MEDIATED_NONCANONICAL_NF_KB_SIGNALING	60	0.580753	1.79985	0.000285697	0.00650662	0.005329	4991	tags=66%, list=14%, signal=57%	5698/5698/5698/5698/5698/5698/5698/5698/5698/5698/5698/5698/5698/5698/5698/5698/5698/5698/5698/5698/5698/5698/5698/5698/5698/5698/5698/5698/5698/5698/5698/5698/5698/5698/5698/5698/5698/5698/5698/5698/5696/5696/5696/5696/5696/5696/5696/5696/8454/5696/5696/5696/5696/5696/5696/5696/5696/5696/5696/5696/5696/5696/5696/5696/5696/5696/5696/5696/5696/5696/5696/5696/5696/5696/5696/5696/5696/5696/5696/5696…
PAPASPYRIDONOS_UNSTABLE_ATEROSCLEROTIC_PLAQUE_UP	PAPASPYRIDONOS_UNSTABLE_ATEROSCLEROTIC_PLAQUE_UP	52	0.614063	1.86988	0.000292251	0.00656046	0.0053731	2225	tags=18%, list=6%, signal=17%	1439/1520/8635/64092/5552/2760/51338/2889/2752/9761/3071/3916/5937/8804/23471/6185/8832/55041/54
REACTOME_INTERLEUKIN_12_FAMILY_SIGNALING	REACTOME_INTERLEUKIN_12_FAMILY_SIGNALING	57	0.590919	1.80905	0.000290614	0.00656046	0.0053731	5191	tags=47%, list=14%, signal=40%	3936/4478/4282/4282/1072/1265/9049/9466/9466/9987/3181/5062/5908/4001/5721/5721/6774/5898/6627/3185/302/9244/552900/552900/654483/5478/4507/6950/3716/829
MANNE_COVID19_COMBINED_COHORT_VS_HEALTHY_DONOR_PLATELETS_UP	MANNE_COVID19_COMBINED_COHORT_VS_HEALTHY_DONOR_PLATELETS_UP	176	-0.454735	-1.59238	0.000290829	0.00656046	0.0053731	4683	tags=22%, list=13%, signal=19%	64761/259173/6892/6892/6892/6892/6892/5533/100527963/2232/83999/5833/10661/339416/128387/1004/348487/3429/3429/6535/54897/27290/84182/8818/51237/7106/26262/55515/147968/3425/3665/3665/1154/203054/203054/149345/149473/2995/92815/92815/3718/3046/90990/51327/63943/63943/63943/63943/63943/63943/63943/63943/55633/3145/1649/3270/1942/3792/3792/80781/51629/3043/388588/57674/6513/10912/2038/125875/3045/5…
REACTOME_MITOTIC_METAPHASE_AND_ANAPHASE	REACTOME_MITOTIC_METAPHASE_AND_ANAPHASE	235	0.407168	1.51728	0.000291976	0.00656046	0.0053731	6355	tags=50%, list=18%, signal=41%	5698/5698/5698/5698/5698/5698/5698/5698/5698/5698/5698/5698/5698/5698/5698/5698/5698/5698/5698/5698/5698/5698/5698/5698/92421/5698/5698/5698/5698/5698/5698/5698/5698/5698/5698/5698/5698/5698/5698/5698/5698/5696/5696/5696/5696/5696/5696/5696/5696/7324/55706/7321/25909/3837/91782/5696/5696/5696/5696/5696/5696/5696/5696/5696/5696/5696/5696/5696/5696/5696/5696/5696/5696/5696/5696/5696/5696/5696/5696/…
REACTOME_ERYTHROCYTES_TAKE_UP_CARBON_DIOXIDE_AND_RELEASE_OXYGEN	REACTOME_ERYTHROCYTES_TAKE_UP_CARBON_DIOXIDE_AND_RELEASE_OXYGEN	13	-0.859624	-1.87303	0.000295935	0.00661942	0.00542139	2166	tags=62%, list=6%, signal=58%	606495/51706/759/3043/3039/358/3040/6521
KOBAYASHI_EGFR_SIGNALING_24HR_DN	KOBAYASHI_EGFR_SIGNALING_24HR_DN	253	0.398103	1.494	0.000297755	0.00663644	0.00543532	4740	tags=31%, list=13%, signal=27%	6947/203068/203068/203068/203068/203068/203068/203068/203068/2171/55165/28231/6949/63901/9987/6632/84823/7374/136/558/8061/993/1854/595/11135/7371/4001/51330/1798/51192/93081/9221/55199/4175/4830/8091/4172/6627/51182/7398/10036/11130/2237/6723/54517/5902/81831/203068/203068/203068/203068/203068/203068/203068/203068/203068/203068/203068/203068/203068/203068/203068/203068/203068/203068/203068/20306…
ZHAN_MULTIPLE_MYELOMA_SUBGROUPS	ZHAN_MULTIPLE_MYELOMA_SUBGROUPS	30	0.711594	1.91951	0.000299028	0.00664119	0.00543922	7610	tags=63%, list=21%, signal=50%	2280/1676/2339/7341/7360/1965/10036/5902/1460/1460/1460/1460/1460/1460/1460/2547/1967/4436/2146/1460/1460/1460/1460/1460/1460/1460/10213/4528/1460/1460/1460/1460/1460/1460/1460/10575/5425/990/7336/5591/6631/6634/1460/1460/1460/1460/1460/1460/1460
REACTOME_RHOBTB2_GTPASE_CYCLE	REACTOME_RHOBTB2_GTPASE_CYCLE	23	0.740087	1.88051	0.000310595	0.0068495	0.00560982	880	tags=22%, list=2%, signal=22%	87/71/7919/7919/7919/7919/7919/7919/7919/7919/1627/7919/7919/7919/7919/7919/7919/7919/7919
LINDGREN_BLADDER_CANCER_CLUSTER_3_UP	LINDGREN_BLADDER_CANCER_CLUSTER_3_UP	322	0.377044	1.45332	0.000310273	0.0068495	0.00560982	7117	tags=33%, list=20%, signal=27%	387882/1622/6646/8905/55165/4925/4291/53354/2182/1612/57335/91607/307/84908/10549/5325/6941/6941/6941/6941/6941/6941/6941/5037/22920/57045/7126/3925/221491/10040/51605/9590/2739/285550/10775/57325/10055/993/7371/8725/3708/9711/79022/93081/5889/10682/9392/211/8208/4175/10965/64395/5184/6184/1827/8574/10036/89891/1478/57026/11130/7775/50999/729967/204/55972/34/81831/201562/5717/6183/6183/10459/2607…
REACTOME_MITOCHONDRIAL_PROTEIN_IMPORT	REACTOME_MITOCHONDRIAL_PROTEIN_IMPORT	65	0.564702	1.7733	0.000312397	0.00686506	0.00562257	6587	tags=45%, list=18%, signal=37%	7416/100272147/400916/400916/10452/8604/23203/10440/2395/498/388753/92609/51287/26517/150274/29090/56993/131474/100188893/9868/2671/401505/26521/29928/29928/29928/506/291/4714/51142/4580
KEGG_PORPHYRIN_AND_CHLOROPHYLL_METABOLISM	KEGG_PORPHYRIN_AND_CHLOROPHYLL_METABOLISM	39	-0.673338	-1.87059	0.000314883	0.00689551	0.0056475	3483	tags=33%, list=10%, signal=29%	7366/7366/54658/7364/7389/2235/1371/3145/7390/5498/645/3162/210/212
REACTOME_SWITCHING_OF_ORIGINS_TO_A_POST_REPLICATIVE_STATE	REACTOME_SWITCHING_OF_ORIGINS_TO_A_POST_REPLICATIVE_STATE	90	0.505394	1.67442	0.00031687	0.00691484	0.00566334	4991	tags=59%, list=14%, signal=51%	8900/5698/5698/5698/5698/5698/5698/5698/5698/5698/5698/5698/5698/5698/5698/5698/5698/5698/5698/5698/5698/5698/5698/5698/5698/5698/5698/5698/5698/5698/5698/5698/5698/5698/5698/5698/5698/5698/5698/5698/5698/5696/5696/5696/5696/5696/5696/5696/5696/7324/7321/8454/5696/5696/5696/5696/5696/5696/5696/5696/5696/5696/5696/5696/5696/5696/5696/5696/5696/5696/5696/5696/5696/5696/5696/5696/5696/5696/5696/5696…
ACOSTA_PROLIFERATION_INDEPENDENT_MYC_TARGETS_UP	ACOSTA_PROLIFERATION_INDEPENDENT_MYC_TARGETS_UP	83	0.533593	1.73945	0.000323832	0.00704223	0.00576767	4724	tags=48%, list=13%, signal=42%	6526/11001/5019/2653/25898/25800/1728/9019/27440/4145/642/10434/23076/5037/142/22984/84864/11137/8624/10007/7371/8725/150726/23596/23596/9221/9775/23277/55893/2744/27339/81887/23139/3714/29803/10273/1717/9110/51073/23596/23596/1434
BIOCARTA_CHEMICAL_PATHWAY	BIOCARTA_CHEMICAL_PATHWAY	18	0.784758	1.87848	0.000333031	0.00716951	0.00587192	6508	tags=67%, list=18%, signal=55%	5579/840/207/142/842/317/596/839/1965/836/581/5578
JAIN_NFKB_SIGNALING	JAIN_NFKB_SIGNALING	74	0.550173	1.75795	0.000331661	0.00716951	0.00587192	3708	tags=41%, list=10%, signal=37%	55786/5778/5328/3099/6891/6891/6891/6891/6891/6891/6891/6891/1075/10654/56848/6891/6891/6891/6891/6891/6891/6891/6891/2629/2629/6891/6891/6891/6891/6891/6891/6891/6891/6891/6891/6891/6891/6891/6891/6891/6891/6891/6891/6891/6891/6891/6891/6891/6891/6891/6891/6891/6891/6891/6891/6891/6891/6789/8624/9962/1639/7773/10526/1207/6891/6891/6891/6891/6891/6891/6891/6891/26155/23277/6891/6891/6891/6891/689…
REACTOME_RAC3_GTPASE_CYCLE	REACTOME_RAC3_GTPASE_CYCLE	93	0.512128	1.70607	0.00033312	0.00716951	0.00587192	6850	tags=47%, list=19%, signal=39%	397/347902/4689/4689/1535/57580/23344/4168/2889/55843/29/29/29/3071/23075/613/8936/51347/5062/392/11135/7879/55619/3998/1829/27/10652/7410/28964/55004/2909/23592/395/55114/55114/10006/5295/10787/998/143872/9815/10979/9341/8773/27035/80728/124056
REACTOME_TRNA_PROCESSING_IN_THE_NUCLEUS	REACTOME_TRNA_PROCESSING_IN_THE_NUCLEUS	58	0.584017	1.79194	0.000337959	0.00724876	0.00593682	9624	tags=44%, list=27%, signal=32%	54913/55706/283989/10775/10940/10978/60528/23636/1478/10557/9883/11102/7175/9631/10248/23279/10799/10556/10762/5903/51493/8480/5901/10898/23165/9972/55746/79023/6396/51095/57122/79902/9688/51367/79897/79897/79897/79897/79897/79897/79897/51637/4928/79897/79897/79897/79897/79897/79897/79897/53371
BIOCARTA_FAS_PATHWAY	BIOCARTA_FAS_PATHWAY	30	0.708636	1.91153	0.000345032	0.0073752	0.00604038	4968	tags=66%, list=14%, signal=57%	397/1616/1616/1616/1616/1616/1616/4214/840/6709/142/84823/5062/8772/1676/4001/839/8767/1616/1616/1616/1616/1616/1616/1616/1616/1616/1616/1616/1616/841/1616/1616/1616/1616/1616/1616/6885/836
HALLMARK_E2F_TARGETS	HALLMARK_E2F_TARGETS	200	0.415504	1.52804	0.000347506	0.00740282	0.006063	7823	tags=55%, list=22%, signal=44%	203068/203068/203068/203068/203068/203068/203068/203068/79077/10549/6941/6941/6941/6941/6941/6941/6941/8726/7374/3925/1029/84316/993/1854/4001/10492/9221/9183/5889/4175/4830/4172/6628/6426/6426/1965/7398/9125/5511/84844/55148/55148/6749/9238/204/5902/2547/6839/55646/203068/203068/203068/203068/203068/203068/203068/203068/203068/203068/203068/203068/203068/203068/203068/203068/203068/203068/203068…
REACTOME_RHOA_GTPASE_CYCLE	REACTOME_RHOA_GTPASE_CYCLE	147	0.459731	1.63546	0.000352071	0.00747464	0.00612182	3031	tags=20%, list=8%, signal=19%	54443/57449/115557/55200/10144/10160/10395/10395/2040/23002/23092/84986/64411/10211/10211/10211/10211/10211/10211/10211/10211/55219/4649/11113/23263/9828/23779/58504/10211/10211/10211/10211/10211/10211/10211/10211/10211/10211/10211/10211/10211/10211/10211/10211
REACTOME_CDC42_GTPASE_CYCLE	REACTOME_CDC42_GTPASE_CYCLE	154	0.435988	1.55455	0.000353503	0.00747969	0.00612596	4710	tags=27%, list=13%, signal=24%	397/752/10788/50619/139818/51291/57580/8826/7456/4168/57572/89846/9826/393/396/29/29/29/23526/613/10451/144402/25894/5062/92799/81704/90627/392/3895/11135/7879/55619/10652/7410/23348/9459/51133/116985/9578/28964/55004/2909/10928/7454/8476/56990/64857
VERHAAK_AML_WITH_NPM1_MUTATED_DN	VERHAAK_AML_WITH_NPM1_MUTATED_DN	246	0.401588	1.50899	0.000373034	0.00786636	0.00644265	2435	tags=8%, list=7%, signal=7%	3248/7177/27306/9452/6947/8519/26228/284119/8530/7188/2317/3490/81618/28951/6711/51162/28638/4681/53346/5026/205/4232/109/54360/217/81539/8323/3915/9249/2182/3815/969/54491/8936/4037/23683/6638/116496/51097/6286/22882/55686/2078/7436/7430
VALK_AML_CLUSTER_4	VALK_AML_CLUSTER_4	27	0.716452	1.87148	0.000381672	0.00790153	0.00647145	1154	tags=32%, list=3%, signal=31%	22807/27306/3566/10365/5026/1675/1675/8323/79899
REACTOME_BUTYROPHILIN_BTN_FAMILY_INTERACTIONS	REACTOME_BUTYROPHILIN_BTN_FAMILY_INTERACTIONS	12	0.851102	1.85995	0.00038062	0.00790153	0.00647145	1261	tags=6%, list=4%, signal=6%	10385/11120/11119/11118/10384
HERNANDEZ_MITOTIC_ARREST_BY_DOCETAXEL_2_UP	HERNANDEZ_MITOTIC_ARREST_BY_DOCETAXEL_2_UP	60	0.572773	1.77512	0.000376477	0.00790153	0.00647145	6313	tags=43%, list=18%, signal=35%	4257/9452/3936/3087/9173/1435/2118/10095/5328/9844/969/23683/65108/19/57504/961/90550/7175/1762/4501/79143/79143/79143/79143/79143/79143/79143/79143/79143/79143
MIKKELSEN_MEF_LCP_WITH_H3K27ME3	MIKKELSEN_MEF_LCP_WITH_H3K27ME3	69	-0.572993	-1.77311	0.000381483	0.00790153	0.00647145	8300	tags=44%, list=23%, signal=34%	84812/2538/5078/64241/57695/153579/138307/3067/80320/146556/4633/7226/60484/643596/140706/477/79092/8431/57030/84628/201181/64220/64220/30818/9719/377841/132014/10636/54825/121340/79258/79258/8074/10158/6521
ONDER_CDH1_TARGETS_1_DN	ONDER_CDH1_TARGETS_1_DN	168	0.432016	1.55541	0.000382271	0.00790153	0.00647145	7944	tags=43%, list=22%, signal=34%	865/3576/4232/4149/10269/9180/6566/6566/7372/3157/1992/801/81542/79697/10813/8061/4670/90627/10940/9774/51136/10492/10468/1660/27436/1138/3192/6599/2237/24138/9589/56902/10678/8626/114034/9724/23404/841/6672/57157/54962/4686/6421/1981/55272/3486/79572/10762/4134/10146/3799/10923/3964/3312/990/6674/55681/1848/3301/23212/8886/10808/29015/6428/56983/3609/821/821/9938/55752/26268/23670/9836/9052/6502
MIKKELSEN_NPC_HCP_WITH_H3K27ME3	MIKKELSEN_NPC_HCP_WITH_H3K27ME3	342	-0.392996	-1.45125	0.000378452	0.00790153	0.00647145	9104	tags=40%, list=25%, signal=30%	5522/9353/59307/3785/3785/54738/9228/9228/9228/9228/9228/390598/29785/3061/81035/27022/6425/120237/23349/6926/9619/79605/6531/6531/84929/64711/64711/83881/152/56934/54101/6331/6692/124842/6900/7022/140628/127281/127281/168002/5077/3777/53335/126520/30813/30009/83741/388662/9607/171389/6862/9620/2899/6492/758/6330/1412/57687/57699/575/1103/6493/3790/766/6340/338557/5307/104909134/104909134/1049091…
UDAYAKUMAR_MED1_TARGETS_UP	UDAYAKUMAR_MED1_TARGETS_UP	134	0.458514	1.61632	0.00039025	0.00803993	0.0065848	7542	tags=48%, list=21%, signal=38%	5552/8905/23753/23433/6566/6566/4199/79070/10892/8439/5211/54619/54502/8209/4763/56954/114882/961/27436/5757/2230/5245/2926/167227/92140/10036/10771/10102/5610/7064/80233/1665/858/4200/10328/9317/81611/10228/23405/1841/6573/65990/23554/10923/6182/55684/5723/1615/4669/220988/990/23157/23246/23246/7965/444/9933/9748/64118/10527/10327/65980/9684/5469/51433/151230
REACTOME_ERYTHROCYTES_TAKE_UP_OXYGEN_AND_RELEASE_CARBON_DIOXIDE	REACTOME_ERYTHROCYTES_TAKE_UP_OXYGEN_AND_RELEASE_CARBON_DIOXIDE	9	-0.908764	-1.83074	0.00039696	0.00815135	0.00667606	1392	tags=67%, list=4%, signal=64%	759/3043/3039/358/3040/6521
REACTOME_APOPTOTIC_CLEAVAGE_OF_CELLULAR_PROTEINS	REACTOME_APOPTOTIC_CLEAVAGE_OF_CELLULAR_PROTEINS	38	0.650415	1.85887	0.000401897	0.00822576	0.006737	4968	tags=43%, list=14%, signal=37%	7431/5339/5588/28988/840/6709/51765/4001/1829/10134/2339/5580/839/63967/841/6304/1499/836
REACTOME_BETA_CATENIN_INDEPENDENT_WNT_SIGNALING	REACTOME_BETA_CATENIN_INDEPENDENT_WNT_SIGNALING	145	0.438897	1.56035	0.000404444	0.00825092	0.0067576	5104	tags=53%, list=14%, signal=46%	5579/3709/5216/5698/5698/5698/5698/5698/5698/5698/5698/5698/5698/5698/5698/5698/5698/5698/5698/5698/5698/5698/5698/5698/5698/5698/5698/26523/8323/5698/5698/5698/5698/5698/5698/5698/5698/5698/5698/5698/5698/5698/5698/5698/5698/54331/5696/5696/5696/5696/5696/5696/5696/5696/192670/5530/801/2790/2782/5696/5696/5696/5696/5696/5696/5696/5696/5696/5696/5696/5696/5696/5696/5696/5696/5696/5696/5696/5696/5…
WP_IL3_SIGNALING_PATHWAY	WP_IL3_SIGNALING_PATHWAY	49	0.610037	1.8413	0.000409998	0.00833707	0.00682816	2743	tags=38%, list=8%, signal=36%	1439/3576/5169/7409/4067/5777/2889/7529/6776/969/7040/207/2885/3265/3265/6850/9846/5604/596/6774
SANA_TNF_SIGNALING_DN	SANA_TNF_SIGNALING_DN	83	0.52908	1.72474	0.000416354	0.00843892	0.00691158	1744	tags=11%, list=5%, signal=10%	301/3487/397/25925/2034/7114/56950/8900/216/1728/8099/51313/5567/8436
XU_RESPONSE_TO_TRETINOIN_AND_NSC682994_UP	XU_RESPONSE_TO_TRETINOIN_AND_NSC682994_UP	15	0.818033	1.87648	0.00043126	0.00871283	0.00713592	3271	tags=47%, list=9%, signal=42%	301/8519/3576/3385/2950/3920/3065
DER_IFN_BETA_RESPONSE_UP	DER_IFN_BETA_RESPONSE_UP	103	0.504653	1.70493	0.000432681	0.00871345	0.00713643	6038	tags=58%, list=17%, signal=49%	8519/8826/7726/7726/7726/7726/7726/7726/7726/7726/5698/5698/5698/5698/5698/5698/5698/5698/5698/5698/5698/5698/5698/5698/5698/5698/5698/5698/5698/5698/5698/5698/5698/5698/5698/5698/5698/5698/5698/5698/5698/5698/5698/5698/5698/5698/5698/5698/5698/5698/9636/4131/3133/3133/3133/3133/3133/3133/3133/3133/3133/3133/3133/3133/3133/3133/3133/3133/3133/3133/3133/3133/3133/3133/3133/3133/3133/3133/3133/3133…
HALLMARK_P53_PATHWAY	HALLMARK_P53_PATHWAY	199	-0.439727	-1.54806	0.000448967	0.00899215	0.00736468	3576	tags=32%, list=10%, signal=29%	3725/57763/29948/5564/3006/10140/26471/100/18/55294/6667/81566/900/8870/8870/8870/8870/8870/8870/8651/2052/2810/79651/55332/56997/6520/4851/3872/6004/51181/23654/1606/1839/2040/63874/64787/6236/54541/8744/11202/677/92815/92815/10057/2872/1969/2353/5372/23657/203/8722/51278/1649/1030/467/9314/23645/10628/1647/10614/3162/694/2309/896/5154/30851/8870/8870/8870/8870/8870/8870/8870/8870/8870/8870/8870…
CHARAFE_BREAST_CANCER_LUMINAL_VS_MESENCHYMAL_UP	CHARAFE_BREAST_CANCER_LUMINAL_VS_MESENCHYMAL_UP	440	-0.368866	-1.38141	0.000449392	0.00899215	0.00736468	5498	tags=28%, list=15%, signal=24%	80237/147798/147798/147798/147798/147798/147798/147798/147798/147798/147798/255488/168544/3728/10116/57535/79703/1501/124975/10974/54795/114783/1040/161145/148327/84283/91862/771/64762/3985/10529/54020/2064/4151/55107/56654/5017/85320/55766/3880/2049/4832/23635/51463/7844/2886/7033/400451/91966/54855/10140/64284/5625/5625/999/120224/222/18/5364/29116/5652/54847/1364/55286/84988/57153/6821/6405/79…
HALLMARK_PROTEIN_SECRETION	HALLMARK_PROTEIN_SECRETION	96	0.486753	1.63089	0.000458794	0.00915103	0.00749481	7295	tags=55%, list=20%, signal=44%	7163/1075/259230/10959/967/2717/81542/23095/4074/10040/19/3998/9183/10652/5868/3920/1211/9367/1176/27236/10565/6197/8615/8546/10067/10067/10067/10067/10564/10972/858/11311/9522/81611/9525/3482/1315/51552/9276/372/9341/8773/5538/3382/5594/6643/3875/102/22796/11316/10282/8082/7103/11079
DING_LUNG_CANCER_EXPRESSION_BY_COPY_NUMBER	DING_LUNG_CANCER_EXPRESSION_BY_COPY_NUMBER	100	0.495033	1.66458	0.000464223	0.00922993	0.00755943	7590	tags=48%, list=21%, signal=38%	1635/7163/83636/4214/5584/5062/1871/11196/2551/7013/10016/10526/8725/9920/9920/4285/9897/9896/5184/25879/2971/55636/27257/27000/4752/87178/9530/157769/64963/56990/9107/57129/55900/9868/84312/151987/8480/9352/55623/28957/9555/4659/9972/83548/2017/2017/3840/6391/26260/55608
NAGASHIMA_NRG1_SIGNALING_UP	NAGASHIMA_NRG1_SIGNALING_UP	170	-0.455804	-1.58571	0.0004735	0.00938459	0.00768609	3319	tags=40%, list=9%, signal=37%	23119/7280/1364/1326/8870/8870/8870/8870/8870/8870/1591/4864/23529/3397/7763/8651/26136/57018/2810/4982/1746/7422/3726/1491/1839/23135/4929/1051/5606/3399/3399/1969/5366/8660/2353/7262/7262/23764/51278/1649/133/5187/467/23645/7071/27076/1647/3669/3475/3491/112399/8870/8870/8870/8870/8870/8870/8870/8870/8870/8870/8870/8870/8870/8870/8870/8870/8870/8870/8870/8870/8870/8870/8870/8870/7538/9518/7286/…
DARWICHE_PAPILLOMA_RISK_LOW_UP	DARWICHE_PAPILLOMA_RISK_LOW_UP	162	0.434507	1.55429	0.00048804	0.00964226	0.00789713	5380	tags=32%, list=15%, signal=28%	3976/946/4061/4061/6282/129607/23597/9454/2023/5480/3939/3939/399/7529/5223/2242/2629/2629/116064/558/9689/5230/5211/7371/55969/4691/29101/9711/9801/1994/10767/3416/6426/6426/1984/1984/6723/55651/54065/351/7225/23042/23042/3073/8801/5860/3015/27101/6421/2132/56681/6950/51714/1475/7186/7295/23047
REACTOME_REGULATION_OF_RAS_BY_GAPS	REACTOME_REGULATION_OF_RAS_BY_GAPS	67	0.559673	1.7627	0.000496118	0.00977102	0.00800259	4991	tags=65%, list=14%, signal=56%	161742/5698/5698/5698/5698/5698/5698/5698/5698/5698/5698/5698/5698/5698/5698/5698/5698/5698/5698/5698/5698/5698/5698/5698/5698/5698/5698/5698/5698/5698/5698/5698/5698/5698/5698/5698/5698/5698/5698/5698/5698/5696/5696/5696/5696/5696/5696/5696/5696/5922/5696/5696/5696/5696/5696/5696/5696/5696/5696/5696/5696/5696/5696/5696/5696/5696/5696/5696/5696/5696/5696/5696/5696/5696/5696/5696/5696/5696/5696/56…
ELVIDGE_HIF1A_TARGETS_UP	ELVIDGE_HIF1A_TARGETS_UP	67	0.558682	1.75958	0.0005016	0.00984802	0.00806565	8041	tags=68%, list=22%, signal=53%	6809/3087/9057/11021/55343/8835/79084/2992/54913/79697/11196/3308/55161/5664/10197/11151/55341/3416/64222/9673/6723/56902/6183/6183/3419/51728/10799/79080/8884/57419/9816/55105/29919/10237/6674/1119/55681/3301/23212/10808/51018/23395/23545/51616/1147/10061
ROSS_AML_WITH_MLL_FUSIONS	ROSS_AML_WITH_MLL_FUSIONS	77	0.534695	1.71664	0.000508309	0.00991758	0.00812262	3942	tags=32%, list=11%, signal=29%	29108/822/64110/5552/23424/3956/9638/2182/83464/4033/8835/64780/5223/2242/2629/2629/8454/1298/10113/64747/3074/9553/5090/29887/8574/10479/204/629/629/629/629/629/629/629/629/629/629/629/629/629/629/6813/6813/224
RUIZ_TNC_TARGETS_DN	RUIZ_TNC_TARGETS_DN	143	0.44005	1.56912	0.000507808	0.00991758	0.00812262	6355	tags=33%, list=18%, signal=27%	347902/3576/5214/4232/8682/81539/5328/79077/63901/23180/9397/51232/51232/22800/8061/993/51330/10468/4175/4172/51154/1965/7398/11130/2237/858/3842/64425/8614/79075/54962/51728/79801/10248/8601/9319/79080/9404/23590/54908/4501/27341/990/9833/9837/79627/4085/23234/10383
ZHU_CMV_24_HR_UP	ZHU_CMV_24_HR_UP	82	0.519211	1.69181	0.000510645	0.0099322	0.00813459	8385	tags=71%, list=23%, signal=55%	8519/51083/23516/2023/5214/9636/7873/3133/3133/3133/3133/3133/3133/3133/3133/3133/3133/3133/3133/3133/3133/3133/3133/3133/3133/3133/3133/3133/3133/3133/3133/3133/3133/3133/3133/6890/6890/6890/6890/6890/6890/6890/6890/26003/4790/4869/1964/6629/5690/5684/54704/10962/211/6627/1958/5902/6890/6890/6890/6890/6890/6890/6890/6890/6890/6890/6890/6890/6890/6890/6890/6890/3419/5683/5687/56681/122830/6890/68…
REACTOME_SPHINGOLIPID_METABOLISM	REACTOME_SPHINGOLIPID_METABOLISM	90	0.495709	1.64234	0.000522697	0.0101351	0.0083008	7221	tags=37%, list=20%, signal=29%	412/8611/2760/23344/64781/8879/171546/259230/51228/56848/2629/2629/2717/23683/10087/253782/81537/81537/3074/79603/9218/414/410/142891/83850/6610/224/5007/3073/1455/80772/10715/94101/55627/124976/8560/415/57704/25865/4758/4758/4758/4758/4758/4758/4758/4758/4758/4758/4758/4758/4758/4758/4758/4758/94103/7368/166929
SATOH_COLORECTAL_CANCER_MYC_UP	SATOH_COLORECTAL_CANCER_MYC_UP	82	0.518722	1.69022	0.000526856	0.0101842	0.00834102	7708	tags=71%, list=21%, signal=56%	2023/2821/2821/9057/109/81034/28231/25800/7372/11164/56996/64841/3945/2739/10007/1854/171568/4830/84172/471/219/6723/3614/87178/2618/2618/64425/51728/2618/2618/545/1841/5433/6573/10606/30834/30834/30834/30834/30834/30834/30834/30834/30834/30834/30834/30834/30834/30834/30834/30834/30834/30834/30834/30834/30834/30834/30834/30834/30834/30834/30834/30834/30834/30834/30834/30834/5425/158/5198/55750/55…
KOBAYASHI_EGFR_SIGNALING_24HR_UP	KOBAYASHI_EGFR_SIGNALING_24HR_UP	98	-0.511177	-1.65567	0.000531399	0.0101989	0.008353	4943	tags=26%, list=14%, signal=22%	360/11152/23224/54145/10529/653145/23097/3006/115/26471/5087/5675/1806/2052/5669/5349/8349/6337/64798/55332/23321/868/4059/63874/3665/3665/3399/3399/57162/57658/51646/7855/54800/4601/2180/3162/113146/25840/1831/604/113791/8991
HUANG_GATA2_TARGETS_UP	HUANG_GATA2_TARGETS_UP	151	0.442714	1.58051	0.000532106	0.0101989	0.008353	2867	tags=53%, list=8%, signal=49%	8519/9535/55819/10788/3087/30011/9840/64092/5552/11213/7048/5698/5698/5698/5698/5698/5698/5698/5698/5294/3956/1471/5698/5698/5698/5698/5698/5698/5698/5698/5698/5698/5698/5698/5698/5698/5698/5698/4258/5339/23682/64781/6688/26037/5698/5698/5698/5698/5698/5698/5698/5698/5698/5698/5698/5698/5698/5698/5698/5698/112616/3815/3133/3133/3133/3133/3133/3133/3133/3133/3133/3133/3133/3133/3133/3133/3133/3133…
SMID_BREAST_CANCER_NORMAL_LIKE_UP	SMID_BREAST_CANCER_NORMAL_LIKE_UP	474	0.342129	1.36909	0.000532497	0.0101989	0.008353	1726	tags=7%, list=5%, signal=7%	9452/4689/4689/9535/1794/752/26228/5579/50619/1043/3087/9840/81553/51291/10659/51411/81618/5552/216/4067/3561/28638/7456/5026/3574/27040/5788/5788/5788/5788/54360/4065/10319/393/28815/3937/55843/3815/5588/9844/4033/2669/3071/23526/969/26191/120/54700/54700/5937/11118/1075/9046/9466/9466/4145/6285/10384/951/79649/10157/23228/23228/10580/80342/3384/3945/10253
REACTOME_DISEASES_OF_SIGNAL_TRANSDUCTION_BY_GROWTH_FACTOR_RECEPTORS_AND_SECOND_MESSENGERS	REACTOME_DISEASES_OF_SIGNAL_TRANSDUCTION_BY_GROWTH_FACTOR_RECEPTORS_AND_SECOND_MESSENGERS	431	0.34999	1.38806	0.000538473	0.0102819	0.00842099	6092	tags=44%, list=17%, signal=37%	7171/161742/4478/7409/71/51411/6711/8826/4067/7048/5698/5698/5698/5698/5698/5698/5698/5698/5698/5698/5698/5698/5698/5698/5698/5698/7525/60/5698/5698/5698/5698/5698/5698/5698/5698/57085/8323/5698/5698/5698/5698/5698/5698/5698/5698/5698/5698/5698/5698/5698/5698/5698/5698/83464/3815/1445/7529/5696/5696/5696/5696/5696/5696/5696/5696/6776/80824/80824/613/2120/7414/5037/7040/207/51107/801/7170/8454/228…
LEE_LIVER_CANCER_SURVIVAL_DN	LEE_LIVER_CANCER_SURVIVAL_DN	178	0.421935	1.52317	0.00054258	0.0103288	0.00845942	3717	tags=30%, list=10%, signal=27%	7114/10227/2171/1192/1192/1192/1192/1192/1192/1192/1192/1192/1192/1192/1192/1192/1192/1192/1192/1192/1192/1192/1192/1192/1192/1192/1192/1192/1192/1192/1192/1192/1192/1192/1192/1192/1192/1192/1192/1192/1192/1192/1192/1192/1192/5355/307/79077/7529/93663/55706/51002/586/7414/7321/51101/10099/3150/4869/6629/3276/8725/6418/1829/55920/55920/1192/1192/1192/1192/1192/1192/1192/3275/9775/5757/10981/22916/…
ZHAN_VARIABLE_EARLY_DIFFERENTIATION_GENES_DN	ZHAN_VARIABLE_EARLY_DIFFERENTIATION_GENES_DN	30	0.698831	1.88508	0.000549643	0.0104316	0.00854358	7672	tags=58%, list=21%, signal=46%	2771/7416/1265/10946/8209/471/6642/2000/5710/22948/23279/79572/2011/2091/2091/5705/891/5859
SABATES_COLORECTAL_ADENOMA_DN	SABATES_COLORECTAL_ADENOMA_DN	287	-0.406475	-1.47977	0.000554969	0.0105008	0.0086003	7739	tags=31%, list=22%, signal=25%	29767/6564/7482/2042/222008/286133/2980/91851/284217/1360/342035/5801/4211/9214/8639/6332/443/3957/248/23768/5865/3899/84417/1101/477/1412/2202/1114/3977/54805/760/1576/11223/766/6340/10004/8076/7276/290/643236/7366/7366/343/7704/4225/220965/3897/9099/55281/3479/115650/5174/5408/7068/2192/2824/58494/25890/1368/9745/4760/108/9429/2690/58476/1087/1087/948/6689/148808/23302/653361/284723/10446/8814/…
KRIEG_KDM3A_TARGETS_NOT_HYPOXIA	KRIEG_KDM3A_TARGETS_NOT_HYPOXIA	195	0.412475	1.5086	0.000558133	0.0105019	0.00860116	7024	tags=42%, list=20%, signal=34%	87/54948/1174/3574/2589/143458/51259/9749/3965/79020/7372/8673/8604/7170/221491/90701/11165/567/567/51805/116496/2739/10857/10775/84926/65260/1207/961/84833/54704/26275/5721/5721/51643/55110/219854/11146/57470/2289/5685/1478/84233/79812/55120/54680/84950/114769/22827/22827/8634/388272/64431/10471/10471/10471/10471/10471/10471/10471/10471/10471/10471/84306/7411/3437/10471/10471/10471/10471/10471/7…
BAELDE_DIABETIC_NEPHROPATHY_DN	BAELDE_DIABETIC_NEPHROPATHY_DN	429	0.345423	1.37051	0.000558378	0.0105019	0.00860116	6016	tags=34%, list=17%, signal=29%	3248/301/7431/9516/8519/10788/2316/71/3490/28951/7076/23061/23061/7490/5698/5698/5698/5698/5698/5698/5698/5698/7155/5778/5698/5698/5698/5698/5698/5698/5698/5698/2752/114908/5698/5698/5698/5698/5698/5698/5698/5698/1635/2149/2923/5698/5698/5698/5698/5698/5698/5698/5698/5698/5698/5698/5698/5698/5698/5698/5698/7184/9180/9636/7004/4249/6890/6890/6890/6890/6890/6890/6890/6890/9683/2992/120/5937/5584/25…
BROWN_MYELOID_CELL_DEVELOPMENT_DN	BROWN_MYELOID_CELL_DEVELOPMENT_DN	128	0.459448	1.60465	0.00056048	0.0105098	0.00860769	5565	tags=12%, list=16%, signal=11%	22807/2624/9840/5780/2149/115024/6566/6566/4249/8645/6659/692312/51491/54888/3150/4869/10857/8204/4691/708/7294/4242/26031/9221/9002/22894/4830/84172/3416/84916/84916/10856/23560/6599/908/2079/10954/23450/2618/2618/8614/2618/2618/4436/51602/863/10528/23160/79668/10204/811/58516/58516
REACTOME_RHO_GTPASES_ACTIVATE_WASPS_AND_WAVES	REACTOME_RHO_GTPASES_ACTIVATE_WASPS_AND_WAVES	35	0.644556	1.81753	0.000563726	0.0105391	0.00863169	6633	tags=69%, list=18%, signal=56%	71/10092/7456/10095/60/10093/10109/3071/10810/10097/8936/2885/10094/5595/7454/10096/695/10552/10006/10787/998/5879/51517/5594
WP_MITOCHONDRIAL_COMPLEX_I_ASSEMBLY_MODEL_OXPHOS_SYSTEM	WP_MITOCHONDRIAL_COMPLEX_I_ASSEMBLY_MODEL_OXPHOS_SYSTEM	56	0.566038	1.72703	0.000567437	0.010577	0.00866265	9861	tags=78%, list=27%, signal=57%	4718/90871/55863/4708/4717/4706/51103/4712/4707/29078/51079/54968/51300/51295/91942/4702/55967/4709/55101/4725/4722/4722/4710/4694/4714/54539/4731/4715/4713/4541/55471/137682/4726/4729/4698/4716/4720/4700/4700/4700/4700/4700/4700/4700/4700/4700/4700/4700/4700/4700/4700/4700/4723/4696/4696/4696/4696/4696/4696/4696/4696/4696/4696
XU_GH1_EXOGENOUS_TARGETS_UP	XU_GH1_EXOGENOUS_TARGETS_UP	51	-0.609334	-1.77594	0.000574146	0.0106703	0.00873908	2921	tags=60%, list=8%, signal=55%	80863/80863/80863/80863/80863/80863/80863/80863/80863/80863/80863/80863/80863/80863/80863/80863/94097/845/997/79570/2057/80863/80863/80863/80863/80863/80863/80863/80863/80863/80863/80863/80863/80863/80863/80863/80863/80863/80863/80863/80863/80863/80863/80863/80863/80863/80863/80863/80863/80863/80863/80863/80863/80863/80863/80863/80863/80863/80863/80863/80863/80863/80863/80863/80863/80863/80863/80…
BENPORATH_PROLIFERATION	BENPORATH_PROLIFERATION	147	0.452207	1.60869	0.000579021	0.010729	0.00878721	7934	tags=43%, list=22%, signal=33%	28978/6282/9168/11164/51571/10447/142/6632/3925/83879/8872/84259/5684/8208/55110/4172/3066/51182/3608/23560/5902/2618/2618/113115/10328/1058/9377/3015/2618/2618/4436/84319/79017/5202/58528/2146/1434/1841/113130/3838/23590/6637/9582/7979/55732/2665/3964/59345/4085/5962/9939/4087/51029/4605/79723/3267/27042/7913/23080/9088/9141/5111/84057/699
REACTOME_RHOG_GTPASE_CYCLE	REACTOME_RHOG_GTPASE_CYCLE	73	0.530656	1.69407	0.000585232	0.0107728	0.00882301	5958	tags=38%, list=17%, signal=32%	397/1794/10788/7409/57580/23344/4168/396/10451/5062/392/3895/11135/7879/3998/1829/10652/7410/3954/23141/63916/55004/2909/3336/23592/5295/9732/4722/4722/998
WP_CYTOSOLIC_DNASENSING_PATHWAY	WP_CYTOSOLIC_DNASENSING_PATHWAY	71	0.532798	1.68632	0.000585526	0.0107728	0.00882301	7344	tags=42%, list=20%, signal=33%	29108/9641/79671/9636/340061/340061/4790/4793/4793/8772/5435/171568/54941/23586/841/9140/55703/51728/5434/9533/8737/115004/11035/11035/5437/661/9474/29110/11128/834/10623/3661
HALLMARK_DNA_REPAIR	HALLMARK_DNA_REPAIR	149	0.445078	1.58293	0.000586541	0.0107728	0.00882301	7995	tags=63%, list=22%, signal=49%	6809/129607/3059/4090/6924/192670/7372/10959/8237/2068/79720/10946/1854/5435/51292/51292/1603/10134/5436/10189/2958/10978/2965/2965/22916/4830/5898/6829/11130/2237/3704/9883/6749/8178/552900/552900/25920/54487/6827/5982/5434/4350/9533/10309/6431/5433/11047/1069/8480/29927/30834/30834/30834/30834/30834/30834/30834/30834/30834/30834/30834/30834/30834/30834/30834/30834/30834/30834/30834/30834/30834/…
BOYAULT_LIVER_CANCER_SUBCLASS_G5_DN	BOYAULT_LIVER_CANCER_SUBCLASS_G5_DN	28	0.699239	1.84257	0.00059341	0.010867	0.00890023	277	tags=4%, list=1%, signal=4%	397/7805/6282/1535/10659/7456
REACTOME_COMPLEX_I_BIOGENESIS	REACTOME_COMPLEX_I_BIOGENESIS	57	0.573307	1.75513	0.000595223	0.0108685	0.00890141	9861	tags=77%, list=27%, signal=56%	4718/55863/4708/4717/79133/4706/51103/4712/4707/29078/4537/51079/4704/51300/51295/91942/4702/55967/4709/4725/4722/4722/4710/4694/4714/54539/4731/4715/4713/4541/55471/137682/4726/4729/4698/4716/4720/4700/4700/4700/4700/4700/4700/4700/4700/4700/4700/4700/4700/4700/4700/4700/4723/4696/4696/4696/4696/4696/4696/4696/4696/4696/4696
WP_TNFALPHA_SIGNALING_PATHWAY	WP_TNFALPHA_SIGNALING_PATHWAY	91	0.503405	1.66779	0.000607109	0.0110212	0.00902652	6850	tags=29%, list=19%, signal=24%	1535/5836/2752/7132/4214/840/207/8454/4790/4794/4793/4793/2885/8439/8772/3265/3265/842/317/5871/8567/6610/5515/5595/4893/841/8844/10131/6885/836/8737/7186/4791/11140/7295/8837/11035/11035/5601/4215/5879/581/5594/29110/27035/124056
BLANCO_MELO_COVID19_SARS_COV_2_INFECTION_CALU3_CELLS_UP	BLANCO_MELO_COVID19_SARS_COV_2_INFECTION_CALU3_CELLS_UP	326	-0.398022	-1.4682	0.000605716	0.0110212	0.00902652	3838	tags=14%, list=11%, signal=12%	55281/9473/10964/6373/3097/3725/9881/352999/26471/4734/8482/8482/4804/4050/4050/4050/4050/4050/4050/4050/4050/1326/330/84875/4585/4585/4585/4585/4585/4585/4585/4585/4982/89797/7057/114897/80329/88/221458/51171/89795/1491/1839/54674/256236/25780/54464/440/687/80830/3665/3665/4792/7439/23037/57597/2323/79132/91947/220213/153020/5105/80832/199920/5366/8660/84166/5187/727758/3659/3656/467/9314/154/23…
ONO_AML1_TARGETS_DN	ONO_AML1_TARGETS_DN	41	0.624335	1.79739	0.000614256	0.0110907	0.0090834	4678	tags=35%, list=13%, signal=30%	3487/3566/837/8835/975/3682/142/8832/3565/1236/1021/860/7852/976/2833
KEGG_PARKINSONS_DISEASE	KEGG_PARKINSONS_DISEASE	126	0.465905	1.62202	0.000614477	0.0110907	0.0090834	9861	tags=65%, list=27%, signal=48%	4718/7416/7317/51465/7332/842/4708/522/65018/518/5481/317/4717/498/11315/118424/4513/4706/4514/7326/4712/4707/6390/4509/7388/4537/7386/4704/9377/1345/27089/7384/4702/836/7417/7345/4709/506/1337/517/1351/4725/56901/4722/4722/6392/291/4710/509/4694/6389/9627/4714/513/1327/4731/515/4715/1329/6391/54205/4713/539/4541/4726/4508/4729/440567/4698/4716/29796/1347/4720/4700/4700/4700/4700/4700/4700/4700/4…
IRITANI_MAD1_TARGETS_DN	IRITANI_MAD1_TARGETS_DN	45	0.605333	1.7813	0.000617146	0.0111069	0.00909665	11162	tags=84%, list=31%, signal=58%	2821/2821/79077/6566/6566/3188/84326/92675/4869/1854/654364/708/4175/51692/5917/5464/6723/445/7384/5887/8884/10514/28973/28973/28973/28973/28973/28973/28973/2091/2091/790/1938/23062/5424/29086/191/3313/3843/28973/28973/28973/28973/28973/28973/28973/28973/28973/28973/28973/28973/28973/28973/28973/28973/28973/28973/28973/28973/28973/28973/28973/28973/28973/28973/28973/28973/28973/28973/28973/28973/…
DESERT_STEM_CELL_HEPATOCELLULAR_CARCINOMA_SUBCLASS_UP	DESERT_STEM_CELL_HEPATOCELLULAR_CARCINOMA_SUBCLASS_UP	241	0.398031	1.48807	0.000631494	0.0113325	0.00928147	4976	tags=42%, list=14%, signal=36%	5315/822/6282/7188/3576/55353/2023/55165/1192/1192/1192/1192/1192/1192/1192/1192/1192/1192/1192/1192/1192/1192/1192/1192/1192/1192/1192/1192/1192/1192/1192/1192/1192/1192/1192/1192/1192/1192/1192/1192/1192/1192/1192/1192/1192/1192/1192/1192/1192/1192/3915/6690/9456/5355/3099/10109/25829/1075/6659/11015/1462/642/3682/10099/84823/51765/65108/80150/8439/10007/6297/64943/993/7371/3276/4691/23171/3460…
GARGALOVIC_RESPONSE_TO_OXIDIZED_PHOSPHOLIPIDS_GREY_UP	GARGALOVIC_RESPONSE_TO_OXIDIZED_PHOSPHOLIPIDS_GREY_UP	17	-0.793586	-1.83245	0.000652251	0.0116073	0.00950656	1974	tags=41%, list=6%, signal=39%	6654/89795/81606/91947/153222/3656/6095
ELVIDGE_HYPOXIA_UP	ELVIDGE_HYPOXIA_UP	170	-0.44953	-1.56389	0.000654222	0.0116073	0.00950656	2618	tags=18%, list=7%, signal=17%	2908/22863/6695/10144/23705/5163/1466/230/7422/55139/23002/1528/26118/54541/4016/8996/54800/23363/8974/2353/11045/4601/1999/23764/133/467/10628/3669/51129/3491/113146/5155/3855/112399/9518/667/780/780/780/780/780/780/780/10397/4616/1843/6513
KEGG_REGULATION_OF_ACTIN_CYTOSKELETON	KEGG_REGULATION_OF_ACTIN_CYTOSKELETON	210	0.409334	1.52297	0.000652518	0.0116073	0.00950656	6267	tags=34%, list=17%, signal=28%	87/10788/4478/7114/7409/71/10092/5216/8826/5294/10095/60/89846/2149/9564/9564/1729/10093/1072/1445/56034/10109/9138/3071/54961/3682/7414/10627/10451/3693/8936/5062/81873/22800/5500/3265/3265/10094/5604/7430/7410/93408/5829/5880/10297/3685/9459/5499/28964/5595/4893/1730/2909/23396/5501/7454/623/387/4636/103910/3678/4627/2259/10552/5295/2253/10787/81/81/998/5962/22808/5879
HALLMARK_TNFA_SIGNALING_VIA_NFKB	HALLMARK_TNFA_SIGNALING_VIA_NFKB	198	-0.431976	-1.51836	0.000653187	0.0116073	0.00950656	3291	tags=23%, list=9%, signal=21%	7280/2355/1326/330/1880/8870/8870/8870/8870/8870/8870/2643/23529/57018/10209/941/55332/11080/7422/3726/1839/23135/4929/1051/687/4792/8744/10938/5606/80149/388/9021/8660/6385/2353/7262/7262/23764/51278/1942/5187/3659/3572/467/9314/23645/10957/7071/1647/694/3491/8870/8870/8870/8870/8870/8870/8870/8870/8870/8870/8870/8870/8870/8870/8870/8870/8870/8870/8870/8870/8870/8870/8870/8870/7538/10769/1026/64…
REACTOME_DEATH_RECEPTOR_SIGNALLING	REACTOME_DEATH_RECEPTOR_SIGNALLING	139	0.436928	1.54755	0.000671807	0.0118857	0.00973451	5689	tags=25%, list=16%, signal=21%	7409/57580/27018/84033/4168/7132/89846/9826/100271715/83464/9138/9500/396/29/29/29/5584/10451/51107/23370/4790/3654/8439/8772/8797/4974/55851/5664/7410/3066/9459/5663/8567/3065/8795/331/6610/8767/9530/11108/841/8841/6885/64857/387/835/836/8737/7186/25999/8837/23385
BASAKI_YBX1_TARGETS_UP	BASAKI_YBX1_TARGETS_UP	282	0.382713	1.45619	0.000696367	0.0122855	0.010062	6647	tags=30%, list=19%, signal=25%	2200/10874/7171/284119/2316/2317/55165/58491/254427/134265/9180/83605/4131/2950/9948/54939/79084/51022/11164/51002/57415/359845/359845/27166/84823/7374/3654/558/81873/192111/10055/53838/2590/51330/84259/30844/65018/1660/6341/10189/2744/4172/6627/3608/10036/9125/11130/84962/2237/124565/390/6591/3858/26147/2618/2618/9265/1058/8520/54069/9904/10212/5982/79801/148103/27101/2618/2618/23623/9319/79866/…
REACTOME_RNA_POLYMERASE_I_TRANSCRIPTION_INITIATION	REACTOME_RNA_POLYMERASE_I_TRANSCRIPTION_INITIATION	47	0.603108	1.80017	0.00070945	0.0124462	0.0101936	7663	tags=69%, list=21%, signal=55%	1022/1022/2968/2968/2968/2968/2968/2968/10919/10919/10919/10919/10919/10919/10919/54700/54700/2068/221830/10919/10919/10919/10919/10919/10919/10919/10919/10919/10919/10919/10919/10919/10919/53615/57504/1108/5435/25885/10919/10919/10919/10919/10919/10919/10919/2965/2965/84172/3066/3065/54815/9112/64425/5434/1107/5931/9533/9219/2968/2968/2968/2968/2968/2968/2968/2968/2968/2968/2968/2968/30834/30834…
REACTOME_RESPONSE_OF_EIF2AK4_GCN2_TO_AMINO_ACID_DEFICIENCY	REACTOME_RESPONSE_OF_EIF2AK4_GCN2_TO_AMINO_ACID_DEFICIENCY	101	-0.50146	-1.62848	0.000708086	0.0124462	0.0101936	9213	tags=65%, list=26%, signal=48%	6235/6208/11224/6194/6171/6142/6209/6230/6230/6167/6168/3921/6122/6141/6231/6210/6202/6130/6130/6228/6175/6169/6173/6159/6170/6136/2197/57761/6222/6222/6222/6222/6222/6222/468/6222/6222/6222/6222/6222/6222/6222/6222/6222/6222/6222/6222/6222/6222/6222/6222/6222/6222/6222/6222/6222/6222/6222/6222/6193/23521/6133/9045/6187/6161/51065/6156/25873/6181/6206/6189/6205/6223/6160/6134/6234/6218/6218/6232/…
REACTOME_MAPK6_MAPK4_SIGNALING	REACTOME_MAPK6_MAPK4_SIGNALING	90	0.491502	1.6284	0.000713075	0.0124748	0.010217	4991	tags=58%, list=14%, signal=50%	2118/5698/5698/5698/5698/5698/5698/5698/5698/5698/5698/5698/5698/5698/5698/5698/5698/5698/5698/5698/5698/5698/5698/5698/5698/26523/5698/5698/5698/5698/5698/5698/5698/5698/5698/5698/5698/5698/5698/5698/5698/5698/5696/5696/5696/5696/5696/5696/5696/5696/192670/8555/5062/8202/5567/5696/5696/5696/5696/5696/5696/5696/5696/5696/5696/5696/5696/5696/5696/5696/5696/5696/5696/5696/5696/5696/5696/5696/5696/5…
REACTOME_APC_C_CDH1_MEDIATED_DEGRADATION_OF_CDC20_AND_OTHER_APC_C_CDH1_TARGETED_PROTEINS_IN_LATE_MITOSIS_EARLY_G1	REACTOME_APC_C_CDH1_MEDIATED_DEGRADATION_OF_CDC20_AND_OTHER_APC_C_CDH1_TARGETED_PROTEINS_IN_LATE_MITOSIS_EARLY_G1	73	0.527938	1.68539	0.000727434	0.0126553	0.0103649	4991	tags=62%, list=14%, signal=54%	5698/5698/5698/5698/5698/5698/5698/5698/5698/5698/5698/5698/5698/5698/5698/5698/5698/5698/5698/5698/5698/5698/5698/5698/5698/5698/5698/5698/5698/5698/5698/5698/5698/5698/5698/5698/5698/5698/5698/5698/5696/5696/5696/5696/5696/5696/5696/5696/7324/7321/5696/5696/5696/5696/5696/5696/5696/5696/5696/5696/5696/5696/5696/5696/5696/5696/5696/5696/5696/5696/5696/5696/5696/5696/5696/5696/5696/5696/5696/5696…
COLINA_TARGETS_OF_4EBP1_AND_4EBP2	COLINA_TARGETS_OF_4EBP1_AND_4EBP2	358	0.353846	1.37642	0.00072668	0.0126553	0.0103649	5624	tags=39%, list=16%, signal=34%	4257/1512/4061/4061/10659/1429/53827/5698/5698/5698/5698/5698/5698/5698/5698/5698/5698/5698/5698/5698/5698/5698/5698/5698/5698/5698/5698/5698/5698/5698/5698/217/112939/130589/22954/5698/5698/5698/5698/5698/5698/5698/5698/5698/5698/5698/5698/5698/5698/5698/5698/9636/10419/3133/3133/3133/3133/3133/3133/3133/3133/3133/3133/3133/3133/3133/3133/3133/3133/3133/3133/3133/3133/3133/3133/3133/3133/3133/31…
LANG_MYB_FAMILY_TARGETS	LANG_MYB_FAMILY_TARGETS	29	0.688607	1.84687	0.000741747	0.0128686	0.0105395	2830	tags=41%, list=8%, signal=38%	87/4478/8826/84034/23550/5530/54888/6418/340481/8539/839/1211
REACTOME_PROCESSING_OF_CAPPED_INTRONLESS_PRE_MRNA	REACTOME_PROCESSING_OF_CAPPED_INTRONLESS_PRE_MRNA	28	0.692733	1.82543	0.000748209	0.0129282	0.0105883	7995	tags=72%, list=22%, signal=56%	6635/10978/22916/51692/6628/6636/1478/25888/81608/8106/4686/6637/8189/10898/1477/7884/55339/6634/53981/11051/1479
REACTOME_PCP_CE_PATHWAY	REACTOME_PCP_CE_PATHWAY	91	0.498663	1.65208	0.000749311	0.0129282	0.0105883	4991	tags=59%, list=14%, signal=51%	5579/5216/5698/5698/5698/5698/5698/5698/5698/5698/5698/5698/5698/5698/5698/5698/5698/5698/5698/5698/5698/5698/5698/5698/5698/5698/8323/5698/5698/5698/5698/5698/5698/5698/5698/5698/5698/5698/5698/5698/5698/5698/5698/5696/5696/5696/5696/5696/5696/5696/5696/5696/5696/5696/5696/5696/5696/5696/5696/5696/5696/5696/5696/5696/5696/5696/5696/5696/5696/5696/5696/5696/5696/5696/5696/5696/5696/5696/5696/5696…
PID_FCER1_PATHWAY	PID_FCER1_PATHWAY	60	0.558076	1.72957	0.000756672	0.0130193	0.010663	2856	tags=36%, list=8%, signal=33%	2206/5579/8611/7409/3059/4067/7456/27040/3937/4214/207/1796/4790/5062/2885/3265/3265/6850/9846/5604/5829/5335
RAHMAN_TP53_TARGETS_PHOSPHORYLATED	RAHMAN_TP53_TARGETS_PHOSPHORYLATED	20	0.755719	1.8364	0.000772022	0.0132109	0.0108199	4967	tags=90%, list=14%, signal=78%	301/60/2950/5223/26227/7170/3191/3191/4830/55110/5464/11315/10856/908/3419/51699/10935/1738/5694
BIOCARTA_CASPASE_PATHWAY	BIOCARTA_CASPASE_PATHWAY	22	0.733885	1.83441	0.000772022	0.0132109	0.0108199	6993	tags=82%, list=19%, signal=66%	397/837/840/142/84823/1676/4001/842/317/839/331/841/835/836/5551/4000/1677/834
WP_CILIARY_LANDSCAPE	WP_CILIARY_LANDSCAPE	215	0.401699	1.4947	0.000784974	0.0133959	0.0109714	8785	tags=48%, list=24%, signal=36%	7431/10788/8826/5899/55081/6103/10555/203286/79874/123016/396/10421/9882/4218/2717/116225/801/4790/6629/1892/51668/64792/26146/4236/4175/4172/3066/7260/89891/9125/10980/140465/11020/54512/3065/9883/10128/6993/90410/246175/10726/55207/124401/57136/23404/25980/4704/261726/57560/1345/4436/129880/1499/140735/57414/25804/23265/9669/51552/79699/79989/10296/5713/5704/5704/51138/5879/8732/2077/27183/5521…
CHOI_ATL_STAGE_PREDICTOR	CHOI_ATL_STAGE_PREDICTOR	44	0.607692	1.78144	0.000803383	0.0136728	0.0111982	7709	tags=59%, list=21%, signal=46%	1043/54918/7324/26003/23478/1854/55969/3308/114926/5898/58477/498/54516/7203/9868/55111/58516/58516/10483/91137/51029/23765/23435/54477/27300/27300/29105
REACTOME_INTERLEUKIN_1_FAMILY_SIGNALING	REACTOME_INTERLEUKIN_1_FAMILY_SIGNALING	139	0.434286	1.5382	0.000807294	0.0137021	0.0112222	4991	tags=45%, list=14%, signal=39%	9173/5780/11213/5777/5698/5698/5698/5698/5698/5698/5698/5698/5778/5698/5698/5698/5698/5698/5698/5698/5698/5698/5698/5698/5698/5698/5698/5698/5698/5698/5698/5698/5698/5698/5698/5698/5698/5698/5698/5698/5698/5698/5698/5698/5698/5696/5696/5696/5696/5696/5696/5696/5696/6285/8454/4790/3654/7334/4793/4793/26469/5696/5696/5696/5696/5696/5696/5696/5696/5696/5696/5696/5696/5696/5696/5696/5696/5696/5696/56…
REACTOME_EPH_EPHRIN_SIGNALING	REACTOME_EPH_EPHRIN_SIGNALING	92	0.485147	1.61324	0.000823906	0.0139463	0.0114222	5387	tags=35%, list=15%, signal=30%	71/10092/4067/2051/2051/7525/10095/60/10093/83464/1072/10109/10097/10627/10451/51107/5062/3265/3265/55851/5664/10094/7410/1211/5663/1212/28964/10096/2043/387/103910/4627/10552/1945
REACTOME_ASYMMETRIC_LOCALIZATION_OF_PCP_PROTEINS	REACTOME_ASYMMETRIC_LOCALIZATION_OF_PCP_PROTEINS	63	0.55133	1.72414	0.000834678	0.0140905	0.0115403	4991	tags=64%, list=14%, signal=55%	5698/5698/5698/5698/5698/5698/5698/5698/5698/5698/5698/5698/5698/5698/5698/5698/5698/5698/5698/5698/5698/5698/5698/5698/5698/5698/5698/5698/5698/5698/5698/5698/5698/5698/5698/5698/5698/5698/5698/5698/5696/5696/5696/5696/5696/5696/5696/5696/5696/5696/5696/5696/5696/5696/5696/5696/5696/5696/5696/5696/5696/5696/5696/5696/5696/5696/5696/5696/5696/5696/5696/5696/5696/5696/5696/5696/5696/5696/5696/5696…
WP_CYTOPLASMIC_RIBOSOMAL_PROTEINS	WP_CYTOPLASMIC_RIBOSOMAL_PROTEINS	88	-0.508407	-1.61659	0.00084118	0.0141621	0.011599	9213	tags=65%, list=26%, signal=49%	6235/6208/11224/6194/6171/6142/6209/6230/6230/6167/6168/3921/6122/6141/6231/6210/6202/6130/6130/6228/6175/6169/6173/6159/6170/6136/2197/6222/6222/6222/6222/6222/6222/6222/6222/6222/6222/6222/6222/6222/6222/6222/6222/6222/6222/6222/6222/6222/6222/6222/6222/6222/6222/6222/6222/6222/6222/6193/23521/6133/9045/6187/6161/6156/25873/6181/6206/6189/6205/6223/6160/6134/6234/6218/6218/6232/6158/6196/6203/6…
REACTOME_POSTMITOTIC_NUCLEAR_PORE_COMPLEX_NPC_REFORMATION	REACTOME_POSTMITOTIC_NUCLEAR_PORE_COMPLEX_NPC_REFORMATION	27	0.698796	1.82536	0.000849487	0.0142636	0.0116821	9624	tags=81%, list=27%, signal=60%	55706/25909/3837/7341/23636/1104/9883/3842/9631/23279/5901/23165/7329/55746/79023/6396/5905/57122/79902/9688/4928/53371
JOHNSTONE_PARVB_TARGETS_2_DN	JOHNSTONE_PARVB_TARGETS_2_DN	334	0.365682	1.4113	0.000857054	0.0143522	0.0117546	7092	tags=30%, list=20%, signal=25%	6526/28978/50619/92344/8530/6646/5552/28951/1429/30001/7456/7155/22858/51809/2149/25898/10269/56034/55333/5912/8879/5530/92906/5922/23543/23543/144402/79647/1871/64924/100505687/10236/10236/22929/5690/2746/3308/10492/55161/1122/114882/51406/84890/28991/9697/3033/56897/214/2744/4172/23348/6426/6426/167227/88745/64854/23636/51377/7326/23077/3065/204/55972/27032/1665/10175/26121/26121/26121/26121/26…
NABA_COLLAGENS	NABA_COLLAGENS	44	-0.632836	-1.80667	0.000862973	0.0143745	0.0117729	4221	tags=25%, list=12%, signal=22%	1289/1307/1302/1302/1302/1302/1302/1302/1302/1300/1301/1306/136227/1294/1291/57642/340267/1288/1295/1277/1310/80781/1299
REACTOME_COLLAGEN_CHAIN_TRIMERIZATION	REACTOME_COLLAGEN_CHAIN_TRIMERIZATION	44	-0.632836	-1.80667	0.000862973	0.0143745	0.0117729	4221	tags=25%, list=12%, signal=22%	1289/1307/1302/1302/1302/1302/1302/1302/1302/1300/1301/1306/136227/1294/1291/57642/340267/1288/1295/1277/1310/80781/1299
HESS_TARGETS_OF_HOXA9_AND_MEIS1_UP	HESS_TARGETS_OF_HOXA9_AND_MEIS1_UP	67	0.5457	1.71869	0.000886956	0.0147348	0.0120679	8534	tags=65%, list=24%, signal=50%	2171/4925/7158/56667/586/26227/692312/9583/4602/3384/1854/3276/4691/708/2746/9221/5481/3416/4172/6627/3066/10856/29088/1050/4436/51602/9319/8607/8607/1841/27037/5150/54984/54984/54984/56984/23212/6240/4605/10282/7465/10989/4953/4176/7023/3205/54984/54984/54984
MITSIADES_RESPONSE_TO_APLIDIN_UP	MITSIADES_RESPONSE_TO_APLIDIN_UP	428	-0.37258	-1.39652	0.000892992	0.0147958	0.0121179	6118	tags=34%, list=17%, signal=28%	50854/50854/50854/50854/50854/50854/50854/50854/50854/50854/5252/5252/5252/50854/50854/50854/50854/50854/5209/8470/51093/51276/753/64091/50854/50854/50854/50854/50854/23515/55818/5514/5514/5514/5514/5514/5514/5514/3111/3111/3111/3111/3111/3111/3111/54997/5407/54454/6498/25861/57396/8013/64061/4779/4750/7080/55729/7320/23608/10579/79669/79669/79365/2571/9400/22861/374/2131/9842/9842/9842/3630/5493…
REACTOME_HEDGEHOG_LIGAND_BIOGENESIS	REACTOME_HEDGEHOG_LIGAND_BIOGENESIS	64	0.548201	1.72095	0.00091974	0.0151988	0.012448	4991	tags=64%, list=14%, signal=55%	5698/5698/5698/5698/5698/5698/5698/5698/5698/5698/5698/5698/5698/5698/5698/5698/5698/5698/5698/5698/5698/5698/5698/5698/5698/5698/5698/5698/5698/5698/5698/5698/5698/5698/5698/5698/5698/5698/5698/5698/2262/5696/5696/5696/5696/5696/5696/5696/5696/5696/5696/5696/5696/5696/5696/5696/5696/5696/5696/5696/5696/5696/5696/5696/5696/5696/5696/5696/5696/5696/5696/5696/5696/5696/5696/5696/5696/5696/5696/5696…
MORI_MATURE_B_LYMPHOCYTE_UP	MORI_MATURE_B_LYMPHOCYTE_UP	91	0.494458	1.63815	0.00092433	0.0152344	0.0124772	6235	tags=10%, list=17%, signal=9%	4689/4689/1520/3936/1512/5777/3561/23499/5788/5788/5788/5788/8682/25939/9308/54918/4218/3588/81537/81537/64841/19/348/5604/5463/23077/84641/246175/632/22821/22821/57157/113/3459/6388/23160/9497/972/202/3109/3109/3109/3109/3109/3109/3109/3109/4170/85359/3112/3112/3112/3112/3112/3112/8477
PHESSE_TARGETS_OF_APC_AND_MBD2_UP	PHESSE_TARGETS_OF_APC_AND_MBD2_UP	19	0.749371	1.81517	0.000929008	0.0152713	0.0125074	1171	tags=25%, list=3%, signal=24%	29108/3709/3133/3133/3133/3133/3133/3133/3133/3133/3133/3133/3133/3133/3133/3133/3133/3133/3133/3133/3133/3133/3133/3133/3133/3133/3133/3133/3133/3133/10927
SHIPP_DLBCL_VS_FOLLICULAR_LYMPHOMA_UP	SHIPP_DLBCL_VS_FOLLICULAR_LYMPHOMA_UP	45	0.596503	1.75532	0.000949862	0.0155733	0.0127547	5886	tags=54%, list=16%, signal=45%	5315/4282/4282/2023/2760/3939/3939/5214/5223/5351/5721/5721/4830/6628/1211/471/7064/7203/226/22948/1058/10437/10131/3838/3326/9833
JINESH_BLEBBISHIELD_VS_LIVE_CONTROL_UP	JINESH_BLEBBISHIELD_VS_LIVE_CONTROL_UP	387	-0.381509	-1.42173	0.00099276	0.0162341	0.0132959	6778	tags=30%, list=19%, signal=24%	3952/118738/57761/283008/4141/468/29123/374860/11144/7450/27165/22848/23521/147372/84225/57835/2905/84914/2888/2621/440503/6752/126961/54813/4758/4758/4758/4758/4758/4758/4758/4758/91120/613037/613037/57596/389072/389072/64782/64783/833/833/10124/399761/326/23162/1643/126626/8412/1515/968/116115/57477/6904/6904/157777/57582/440353/145482/145482/55367/400713/8140/2218/54922/250/729739/729739/6301/…
HOSHIDA_LIVER_CANCER_SURVIVAL_UP	HOSHIDA_LIVER_CANCER_SURVIVAL_UP	73	0.517783	1.65297	0.0010009	0.0162822	0.0133353	1293	tags=23%, list=4%, signal=22%	301/2200/8826/7456/5698/5698/5698/5698/5698/5698/5698/5698/5698/5698/5698/5698/5698/5698/5698/5698/22858/5698/5698/5698/5698/5698/5698/5698/5698/5698/5698/5698/5698/5698/5698/5698/5698/5698/5698/5698/5698/5698/5698/5698/5698/7004/54898/120/10097/2629/2629
CAIRO_LIVER_DEVELOPMENT_UP	CAIRO_LIVER_DEVELOPMENT_UP	166	0.416768	1.49919	0.000999696	0.0162822	0.0133353	4506	tags=29%, list=13%, signal=25%	5315/865/51309/56950/399664/8303/7490/5480/4232/79047/57645/9306/56034/25800/4249/7105/84908/29967/8936/22920/5954/56995/3150/65108/79596/6595/22859/22859/4756/8091/2287/3066/3488/10000/10000/6723/56902/6558/9324/83743/1741/7347/4826/6304/64425/5218/871/23266/5955/84549
CROMER_METASTASIS_UP	CROMER_METASTASIS_UP	70	0.537208	1.69883	0.00101917	0.0164821	0.013499	1922	tags=19%, list=5%, signal=18%	397/3576/4240/5698/5698/5698/5698/5698/5698/5698/5698/5698/5698/5698/5698/5698/5698/5698/5698/114908/5698/5698/5698/5698/5698/5698/5698/5698/91/1266/5698/5698/5698/5698/5698/5698/5698/5698/5698/5698/5698/5698/5698/5698/5698/5698/9500/79073/22920/142/10857/57720/4277/4277/4277/4277/4277/4277/4277/4277
KEGG_RIG_I_LIKE_RECEPTOR_SIGNALING_PATHWAY	KEGG_RIG_I_LIKE_RECEPTOR_SIGNALING_PATHWAY	71	0.518209	1.64014	0.00102048	0.0164821	0.013499	5144	tags=16%, list=14%, signal=14%	3576/6300/9641/9755/79671/9636/4214/340061/340061/4790/5600/4793/4793/8772/54941/7187/23586/841/9140/6885/8737/7186
CHIANG_LIVER_CANCER_SUBCLASS_PROLIFERATION_DN	CHIANG_LIVER_CANCER_SUBCLASS_PROLIFERATION_DN	175	-0.4342	-1.51823	0.00102109	0.0164821	0.013499	5784	tags=30%, list=16%, signal=26%	3172/8470/283927/2110/284541/1361/5447/1555/27284/7036/5340/2328/94121/635/54988/8608/11162/10747/6554/4051/18/10840/1559/2052/4547/1842/4143/51181/10171/3950/1491/285386/51268/55224/1579/687/10402/5105/3029/388/144193/8630/23562/79777/847/189/154/80781/27141/27141/3242/55638/2875/763/8991
KANNAN_TP53_TARGETS_UP	KANNAN_TP53_TARGETS_UP	57	-0.576078	-1.72239	0.00102986	0.016581	0.01358	6683	tags=45%, list=19%, signal=37%	9607/6834/6834/8572/4092/1263/1643/355/59/6525/3931/5564/6520/7784/1606/220972/220972/4016/5366/7433/467/1647/27113/30851/9518/1026/7832/604
BIOCARTA_FCER1_PATHWAY	BIOCARTA_FCER1_PATHWAY	39	0.63405	1.82194	0.00105797	0.0169325	0.0138679	2895	tags=41%, list=8%, signal=38%	2206/5579/7409/4067/5294/4214/5530/801/5062/2885/3265/3265/6850/4772/5604/5335/4775
YAMAZAKI_TCEB3_TARGETS_DN	YAMAZAKI_TCEB3_TARGETS_DN	195	0.402566	1.47236	0.0010598	0.0169325	0.0138679	4757	tags=43%, list=13%, signal=37%	301/9452/161742/7805/1535/203068/203068/203068/203068/203068/203068/203068/203068/1718/231/10365/4282/4282/217/57085/1729/7163/4131/7416/54331/10810/5935/3157/8726/47/3945/10007/348/1829/26135/7520/2287/79603/5245/6627/11315/10856/64087/64087/64087/1993/10969/6277/1001/56902/30968/7203/55972/5264/203068/203068/203068/203068/203068/203068/203068/203068/203068/203068/203068/203068/203068/203068/203…
AGUIRRE_PANCREATIC_CANCER_COPY_NUMBER_DN	AGUIRRE_PANCREATIC_CANCER_COPY_NUMBER_DN	233	0.386896	1.43941	0.00105614	0.0169325	0.0138679	7561	tags=39%, list=21%, signal=31%	377/51809/1635/91/9306/23616/2137/7078/64780/1413/613/11015/23543/23543/8936/967/23598/23593/3925/1454/23028/9/6595/5908/5435/23541/51441/55832/4242/4772/3275/9841/7436/10767/54471/54471/51303/5536/9896/51643/3066/498/57228/8763/51054/23484/204/5289/7421/7024/9150/9150/26121/26121/26121/26121/26121/26121/26121/26121/26121/26121/6610/2582/55650/11313/79188/11200/56993/10907/84549/4507/26088/6195/6…
GAVIN_FOXP3_TARGETS_CLUSTER_T7	GAVIN_FOXP3_TARGETS_CLUSTER_T7	99	0.476794	1.60128	0.00106653	0.0169967	0.0139205	5578	tags=60%, list=16%, signal=51%	7431/1535/64092/3059/231/2023/3956/309/5696/5696/5696/5696/5696/5696/5696/5696/7905/5696/5696/5696/5696/5696/5696/5696/5696/5696/5696/5696/5696/5696/5696/5696/5696/5696/5696/5696/5696/5696/5696/5696/5696/5696/5696/5696/5696/5696/5696/5696/5696/5696/5696/5696/5696/5696/5696/5696/5696/11171/7371/961/4175/7360/6628/5880/81572/3185/4043/8662/29880/79039/4704/26517/6827/5696/5696/5696/5696/5696/5696/5…
ZHONG_SECRETOME_OF_LUNG_CANCER_AND_ENDOTHELIUM	ZHONG_SECRETOME_OF_LUNG_CANCER_AND_ENDOTHELIUM	68	0.531146	1.67862	0.00108006	0.0171686	0.0140613	4297	tags=34%, list=12%, signal=30%	7431/3487/3490/203068/203068/203068/203068/203068/203068/203068/203068/2023/3939/3939/60/5269/5479/22883/396/7414/5037/7170/2597/2739/1917/154881/65979/7148/7148/7148/7148/7148/7148/7148/7148/7534/629/629/629/629/629/629/629/629/629/629/629/629/629/629/203068/203068/203068/203068/203068/203068/203068/203068/203068/203068/203068/203068/203068/203068/203068/203068/203068/203068/203068/203068/203068…
MOREAUX_B_LYMPHOCYTE_MATURATION_BY_TACI_DN	MOREAUX_B_LYMPHOCYTE_MATURATION_BY_TACI_DN	76	0.524343	1.67873	0.00111	0.0175553	0.014378	8212	tags=59%, list=23%, signal=46%	81539/6566/6566/11164/9616/152100/408050/408050/9158/708/84916/84916/84233/10969/114971/114971/92609/6742/6742/6742/6742/6183/6183/51079/22948/23658/2146/84545/25804/8666/10146/8697/5901/118487/120227/7965/29087/9817/5591/10576/4659/9343/60496/3658/51121/5714/55871/4678/4836/1111/51234/115106
SCHUETZ_BREAST_CANCER_DUCTAL_INVASIVE_UP	SCHUETZ_BREAST_CANCER_DUCTAL_INVASIVE_UP	351	0.360476	1.39726	0.00110779	0.0175553	0.014378	1844	tags=8%, list=5%, signal=8%	301/27306/2200/1439/1520/284119/7805/4478/64092/10659/3490/5552/3059/231/11213/4067/7048/4681/7456/53346/53827/5698/5698/5698/5698/5698/5698/5698/5698/5480/51338/3956/5788/5788/56935/5788/5788/5698/5698/5698/5698/5698/5698/5698/5698/5698/5698/5698/5698/5698/5698/5698/5698/2149/3915/2182/5698/5698/5698/5698/5698/5698/5698/5698/5698/5698/5698/5698/5698/5698/5698/5698/3937/5328/4131/7078/2669/6320/1…
REACTOME_CROSS_PRESENTATION_OF_SOLUBLE_EXOGENOUS_ANTIGENS_ENDOSOMES	REACTOME_CROSS_PRESENTATION_OF_SOLUBLE_EXOGENOUS_ANTIGENS_ENDOSOMES	49	0.587332	1.77277	0.00112197	0.0176555	0.0144601	4991	tags=69%, list=14%, signal=59%	5698/5698/5698/5698/5698/5698/5698/5698/5698/5698/5698/5698/5698/5698/5698/5698/5698/5698/5698/5698/5698/5698/5698/5698/5698/5698/5698/5698/5698/5698/5698/5698/5698/5698/5698/5698/5698/5698/5698/5698/5696/5696/5696/5696/5696/5696/5696/5696/5696/5696/5696/5696/5696/5696/5696/5696/5696/5696/5696/5696/5696/5696/5696/5696/5696/5696/5696/5696/5696/5696/5696/5696/5696/5696/5696/5696/5696/5696/5696/5696…
NAKAMURA_METASTASIS	NAKAMURA_METASTASIS	46	0.585818	1.73755	0.00111936	0.0176555	0.0144601	3719	tags=29%, list=10%, signal=26%	123920/5579/7805/3059/2752/54863/25894/558/5230/8061/64968/84842/6558/23450
REACTOME_P75_NTR_RECEPTOR_MEDIATED_SIGNALLING	REACTOME_P75_NTR_RECEPTOR_MEDIATED_SIGNALLING	96	0.469342	1.57255	0.00112956	0.0177305	0.0145215	4968	tags=36%, list=14%, signal=31%	7409/57580/27018/84033/4168/89846/9826/100271715/83464/9138/9500/396/29/29/29/5584/10451/51107/23370/4790/3654/4974/55851/5664/7410/3066/9459/5663/3065/6610/8767/11108/8841/64857/387/835/836
WP_MAMMARY_GLAND_DEVELOPMENT_PATHWAY_PUBERTY_STAGE_2_OF_4	WP_MAMMARY_GLAND_DEVELOPMENT_PATHWAY_PUBERTY_STAGE_2_OF_4	13	0.823686	1.83193	0.00114357	0.0178989	0.0146594	1980	tags=46%, list=6%, signal=44%	7431/7076/6776/8061/8204/595
BIOCARTA_RAS_PATHWAY	BIOCARTA_RAS_PATHWAY	22	0.723992	1.80968	0.00114601	0.0178989	0.0146594	6267	tags=65%, list=17%, signal=54%	5294/207/4790/3265/3265/842/5604/5898/5595/10928/387/5295/998/2002/5879
ZHU_CMV_ALL_UP	ZHU_CMV_ALL_UP	106	0.469533	1.59762	0.00117343	0.0182816	0.0149728	8385	tags=73%, list=23%, signal=56%	8519/51083/23516/2023/5214/9636/7873/3133/3133/3133/3133/3133/3133/3133/3133/3133/3133/3133/3133/3133/3133/3133/3133/3133/3133/3133/3133/3133/3133/3133/3133/3133/3133/3133/3133/6890/6890/6890/6890/6890/6890/6890/6890/5696/5696/5696/5696/5696/5696/5696/5696/26003/4790/4869/1964/5696/5696/5696/5696/5696/5696/5696/5696/5696/5696/5696/5696/5696/5696/5696/5696/5696/5696/5696/5696/5696/5696/5696/5696/5…
TAKAO_RESPONSE_TO_UVB_RADIATION_DN	TAKAO_RESPONSE_TO_UVB_RADIATION_DN	97	0.480938	1.61111	0.00118191	0.018368	0.0150436	7081	tags=53%, list=20%, signal=43%	865/23516/1718/7132/10095/10093/1022/1022/10419/6924/7158/23180/8813/9689/2004/4670/11137/1052/1892/5664/9711/5684/9221/23189/9685/2965/2965/471/8602/8763/5685/302/9589/8766/4826/9100/3749/5887/123/4791/7458/10694/9643/5394/10488/4170/6047/9933/2098/9802/23212/1775/2308/6428/90362
KEGG_RIBOSOME	KEGG_RIBOSOME	87	-0.509078	-1.61379	0.00119278	0.018491	0.0151444	9213	tags=66%, list=26%, signal=49%	6235/11224/6194/6171/6142/6209/6230/6230/6167/6168/3921/6122/6141/6231/6210/6202/6130/6130/6228/6175/6169/6173/6159/6170/6136/2197/6222/6222/6222/6222/6222/6222/6222/6222/6222/6222/6222/6222/6222/6222/6222/6222/6222/6222/6222/6222/6222/6222/6222/6222/6222/6222/6222/6222/6222/6222/6193/23521/6133/9045/6187/6161/51065/6156/25873/6181/6206/6189/6205/6223/6160/6134/6234/6218/6218/6232/6158/6203/6203/…
REACTOME_MRNA_SPLICING_MINOR_PATHWAY	REACTOME_MRNA_SPLICING_MINOR_PATHWAY	52	0.585022	1.78145	0.00122312	0.0189119	0.015489	9133	tags=79%, list=25%, signal=59%	6635/6632/10081/5435/5436/22916/6628/6426/6426/6636/5431/79622/4809/51639/23450/24148/5434/4686/10907/9410/6431/5433/6637/10992/5432/5437/10262/11325/57819/57819/57819/57819/57819/57819/57819/57819/57819/57819/57819/57819/57819/57819/57819/57819/57819/57819/57819/57819/57819/57819/57819/57819/9343/6634/9416/57819/57819/57819/57819/57819/57819/4904/57819/57819/57819/57819/57819/57819/55954/6633/10…
REACTOME_SUMOYLATION_OF_RNA_BINDING_PROTEINS	REACTOME_SUMOYLATION_OF_RNA_BINDING_PROTEINS	46	0.583216	1.72983	0.00122596	0.0189119	0.015489	692	tags=22%, list=2%, signal=22%	6015/6015/6015/6015/6015/6015/6015/6015/6015/6015/6015/6015/6015/6015/6015/6015/6015/6015
CHIARADONNA_NEOPLASTIC_TRANSFORMATION_KRAS_UP	CHIARADONNA_NEOPLASTIC_TRANSFORMATION_KRAS_UP	131	0.442634	1.54284	0.0012355	0.0190121	0.0155712	4912	tags=28%, list=14%, signal=25%	5579/9173/7114/837/7076/2118/8573/6611/10321/171546/5935/7040/10447/65108/595/6418/1660/5684/5481/2958/2230/8091/3608/11130/51691/6749/6558/2079/4809/22928/1058/3184/81611/25819/3149/54518/60559/3482
NAM_FXYD5_TARGETS_DN	NAM_FXYD5_TARGETS_DN	18	0.754875	1.80695	0.00124566	0.0190748	0.0156225	6024	tags=70%, list=17%, signal=58%	53827/4291/55612/6632/558/10513/1965/64087/64087/64087/400/3336/55750/55750/55750/55750
REACTOME_NEGATIVE_REGULATION_OF_NOTCH4_SIGNALING	REACTOME_NEGATIVE_REGULATION_OF_NOTCH4_SIGNALING	53	0.571308	1.74406	0.00124439	0.0190748	0.0156225	4991	tags=55%, list=14%, signal=47%	5698/5698/5698/5698/5698/5698/5698/5698/5698/5698/5698/5698/5698/5698/5698/5698/5698/5698/5698/5698/5698/5698/5698/5698/5698/5698/5698/5698/5698/5698/5698/5698/5698/5698/5698/5698/5698/5698/5698/5698/5696/5696/5696/5696/5696/5696/5696/5696/207/8454/5696/5696/5696/5696/5696/5696/5696/5696/5696/5696/5696/5696/5696/5696/5696/5696/5696/5696/5696/5696/5696/5696/5696/5696/5696/5696/5696/5696/5696/5696/…
MAGRANGEAS_MULTIPLE_MYELOMA_IGG_VS_IGA_UP	MAGRANGEAS_MULTIPLE_MYELOMA_IGG_VS_IGA_UP	19	0.736425	1.78381	0.00125468	0.019166	0.0156972	3667	tags=58%, list=10%, signal=52%	301/2624/3628/27018/1471/1639/3991/85365/8260/5499/3714
CREIGHTON_AKT1_SIGNALING_VIA_MTOR_DN	CREIGHTON_AKT1_SIGNALING_VIA_MTOR_DN	23	0.707785	1.79843	0.00127444	0.0194205	0.0159056	4722	tags=76%, list=13%, signal=66%	4282/4282/2821/2821/537/7529/5863/5863/5863/5863/5863/5211/51330/5863/5863/5863/5863/5863/5863/5863/5863/5863/5863/5863/5863/5863/5863/5863/226/5863/5863/5863/5863/5863/1717/5518/5531
REACTOME_ANTIMICROBIAL_PEPTIDES	REACTOME_ANTIMICROBIAL_PEPTIDES	96	-0.48619	-1.56502	0.00129514	0.019688	0.0161247	11241	tags=40%, list=31%, signal=28%	245910/245910/245910/245910/245910/245910/245910/245910/245910/245910/503614/503614/503614/503614/503614/503614/503614/503614/503614/503614/1672/1672/245938/92747/114770/6279/5320/80341/1511/6037/84659/920/729230/140596/140596/503618/503618/503618/55600/57119/1991/1991/149954/245915/245930/6556/5657/5657/245908/245908/245908/245908/245929/245939/117159/114771/3346/3346/1667/1667/81623/6278/1668/1…
BYSTROEM_CORRELATED_WITH_IL5_UP	BYSTROEM_CORRELATED_WITH_IL5_UP	42	0.624806	1.80683	0.00130204	0.0197387	0.0161662	7887	tags=59%, list=22%, signal=46%	1512/6809/2624/4925/5553/9046/8673/967/26003/4790/6418/3066/9026/2975/5705/7936/7936/7936/7936/7936/7936/7936/7936/7936/7936/7936/7936/7936/7936/7936/7936/7936/7936/7936/7936/7936/7936/7936/7936/7936/7936/7936/7936/7936/7936/2107
REACTOME_FCERI_MEDIATED_NF_KB_ACTIVATION	REACTOME_FCERI_MEDIATED_NF_KB_ACTIVATION	131	0.440935	1.53692	0.00130478	0.0197387	0.0161662	4991	tags=52%, list=14%, signal=45%	2206/28797/4067/5698/5698/5698/5698/5698/5698/5698/5698/5698/5698/5698/5698/5698/5698/5698/5698/5698/5698/5698/5698/5698/5698/5698/5698/28815/5698/5698/5698/5698/5698/5698/5698/5698/5698/5698/5698/5698/5698/5698/5698/5698/5588/5696/5696/5696/5696/5696/5696/5696/5696/7321/8454/4790/7334/10892/5696/5696/5696/5696/5696/5696/5696/5696/5696/5696/5696/5696/5696/5696/5696/5696/5696/5696/5696/5696/5696/5…
REACTOME_MITOCHONDRIAL_CALCIUM_ION_TRANSPORT	REACTOME_MITOCHONDRIAL_CALCIUM_ION_TRANSPORT	23	0.706862	1.79609	0.00131396	0.0198107	0.0162252	8060	tags=44%, list=22%, signal=34%	55013/7416/55486/23203/3954/5245/30968/79568/90550/7417/221154/10367/6687/8165/10730
REACTOME_HEME_BIOSYNTHESIS	REACTOME_HEME_BIOSYNTHESIS	14	-0.804219	-1.79164	0.00131586	0.0198107	0.0162252	2962	tags=64%, list=8%, signal=59%	9429/7389/2235/1371/3145/7390/5498/210/212
LANDIS_ERBB2_BREAST_TUMORS_324_UP	LANDIS_ERBB2_BREAST_TUMORS_324_UP	150	0.427095	1.52727	0.00132142	0.0198467	0.0162547	3512	tags=39%, list=10%, signal=35%	9516/3709/2317/288/51186/3340/58527/4925/1192/1192/1192/1192/1192/1192/1192/1192/1192/1192/1192/1192/1192/1192/1192/1192/1192/1192/1192/1192/1192/1192/1192/1192/1192/1192/1192/1192/1192/1192/1192/1192/1192/1192/1192/1192/1192/1192/1192/1192/1192/1192/9601/2182/7163/1465/3732/8835/55640/1075/6659/5530/6709/1796/10040/1611/9590/595/5500/3998/1829/1192/1192/1192/1192/1192/1192/1192/64083/7430/10682/…
YAO_TEMPORAL_RESPONSE_TO_PROGESTERONE_CLUSTER_10	YAO_TEMPORAL_RESPONSE_TO_PROGESTERONE_CLUSTER_10	70	0.53207	1.68259	0.00133978	0.0200742	0.016441	7308	tags=65%, list=20%, signal=52%	51186/3939/3939/2653/10959/64924/6185/54888/10236/10236/10946/5435/79002/29101/1603/7341/5898/6741/594/5685/6749/58505/8615/83743/84267/57136/10574/2286/654483/27101/6238/3336/8666/7417/27230/81555/29927/26985/220988/372/466/5828/5194/51569/116540/132/821/821
REACTOME_EPHB_MEDIATED_FORWARD_SIGNALING	REACTOME_EPHB_MEDIATED_FORWARD_SIGNALING	42	0.623273	1.80239	0.0013666	0.0203786	0.0166903	2339	tags=34%, list=7%, signal=32%	71/10092/4067/2051/2051/7525/10095/60/10093/1072/10109/10097/3265/3265/10094
WP_GALANIN_RECEPTOR_PATHWAY	WP_GALANIN_RECEPTOR_PATHWAY	21	-0.733017	-1.77236	0.00136527	0.0203786	0.0166903	4695	tags=57%, list=13%, signal=49%	7020/3630/3880/10018/1385/7422/6844/2353/6517/6517/1026/1028/1028
PID_TCR_PATHWAY	PID_TCR_PATHWAY	62	0.554984	1.729	0.00137955	0.0205229	0.0168085	4495	tags=21%, list=13%, signal=18%	5579/2316/7409/5777/27040/5788/5788/5788/5788/3937/5588/1445/28988/207/10892/2885/3265/3265/9846/5335/919/27347/867/4893/8915/7454
BURTON_ADIPOGENESIS_PEAK_AT_16HR	BURTON_ADIPOGENESIS_PEAK_AT_16HR	41	0.603602	1.7377	0.00138487	0.0205532	0.0168333	5126	tags=54%, list=14%, signal=46%	63901/1462/83879/1854/8208/9188/4175/4172/23/23/23/23/23/23/23/2237/23/23/23/23/23/23/23/23/23/23/23/23/23/23/23/23/23/23/23/23/23/83743/8520/2956/23/23/23/23/23/23/23/445/283871/27131
SERVITJA_ISLET_HNF1A_TARGETS_UP	SERVITJA_ISLET_HNF1A_TARGETS_UP	167	0.418618	1.507	0.00139094	0.0205944	0.0168671	2003	tags=7%, list=6%, signal=7%	301/7431/397/2200/25925/822/8519/7805/4478/1435/1535/51338/3956/23682/6690/4853/6566/6566/1265/64780/4323/1075/1992/4212/9590/348/57447/5834
HALLMARK_MTORC1_SIGNALING	HALLMARK_MTORC1_SIGNALING	199	0.39174	1.43919	0.00141144	0.0208486	0.0170753	7310	tags=51%, list=20%, signal=41%	54843/1718/30001/2023/2821/2821/205/3939/3939/23753/7184/3099/120/1075/4199/3157/586/10097/26227/79071/10452/2717/80777/7374/4074/2597/4793/4793/47/81873/23478/5230/116496/8624/5211/993/3308/10197/5684/10962/7436/11151/10652/6533/10682/2965/2965/5464/3309/3488/6184/51377/5685/908/56902/8615/4783/2286/226/7852/5701/1717/5478/10212/871/5860/9136/27101/2542/2542/10437/10096/3336/10213/4048/9695/899/…
REACTOME_HIV_TRANSCRIPTION_ELONGATION	REACTOME_HIV_TRANSCRIPTION_ELONGATION	43	0.596915	1.74053	0.001423	0.0209627	0.0171687	7921	tags=69%, list=22%, signal=54%	1022/1022/2968/2968/2968/2968/2968/2968/6924/2068/5435/5436/2965/2965/22916/11198/6829/5431/6749/9150/9150/8178/25920/6827/5434/4686/5433/2968/2968/2968/2968/2968/2968/2968/2968/2968/2968/2968/2968/5432/404672/7469/2968/2968/2968/2968/2968/2968/5437/51497/4331/7936/7936/7936/7936/7936/7936/7936/7936/7936/7936/7936/7936/7936/7936/7936/7936/7936/7936/7936/7936/7936/7936/7936/7936/7936/7936/7936/793…
REACTOME_DNA_REPAIR	REACTOME_DNA_REPAIR	310	0.35995	1.38711	0.00142585	0.0209627	0.0171687	6954	tags=34%, list=19%, signal=28%	8900/60/25898/121504/2139/9636/1022/1022/2968/2968/2968/2968/2968/2968/7158/8365/142/7374/2068/7334/3150/5435/7013/221120/9557/4913/5436/378708/7507/9025/5889/7520/55775/5536/54936/2965/2965/27339/79068/7353/7341/7156/7156/79184/121642/7398/252969/5431/10980/63967/2237/80233/55120/29844/29844/29844/29844/29844/29844/29844/29844/29844/29844/9031/283899/2547/91442/4255/10459/8178/199990/165918/1120…
WP_APOPTOSIS_MODULATION_BY_HSP70	WP_APOPTOSIS_MODULATION_BY_HSP70	19	0.733548	1.77684	0.00143251	0.0210112	0.0172084	4886	tags=51%, list=14%, signal=44%	3303/3303/3303/3303/3303/355/5602/3303/3303/3303/3303/3303/3303/3303/3303/3303/3303/3303/3303/3303/3303/3303
LY_AGING_OLD_DN	LY_AGING_OLD_DN	56	0.54098	1.65058	0.0014505	0.0211985	0.0173618	7823	tags=49%, list=22%, signal=38%	3576/7048/1075/142/3028/5684/8883/5902/5717/5701/5683/1058/10212/3015/5501/994/545/1434/899/3832/2091/2091/4605/5347/891/9088/4678/5111
GLASS_IGF2BP1_CLIP_TARGETS_KNOCKDOWN_DN	GLASS_IGF2BP1_CLIP_TARGETS_KNOCKDOWN_DN	117	0.450618	1.54993	0.00145292	0.0211985	0.0173618	7486	tags=47%, list=21%, signal=37%	23516/5780/22858/26523/84912/81614/89958/81552/642/200933/2519/79647/9689/79720/55161/84516/79794/3185/11130/7534/867/55636/84725/10564/2079/80351/1737/55536/10928/9631/81611/54468/390916/10376/123606/123606/2961/25921/57534/51360/3832/79172/90407/23234/6747/8079/10728/5594/51029/10642/53981/11100/5347/6472/5469/128239
IGLESIAS_E2F_TARGETS_UP	IGLESIAS_E2F_TARGETS_UP	143	0.422245	1.50563	0.00145543	0.0211985	0.0173618	4757	tags=57%, list=13%, signal=50%	3487/9452/1520/3936/7805/6282/7358/71/203068/203068/203068/203068/203068/203068/203068/203068/3956/6281/1192/1192/1192/1192/1192/1192/1192/2771/1192/1192/1192/1192/1192/1192/1192/1192/1192/1192/1192/1192/1192/1192/1192/1192/1192/1192/1192/1192/1192/1192/1192/1192/1192/1192/1192/1192/1192/1192/1192/1192/1192/1192/1192/1675/1675/5269/1266/1465/8726/3181/9741/567/567/9689/2782/348/961/27020/1192/119…
KEGG_FC_EPSILON_RI_SIGNALING_PATHWAY	KEGG_FC_EPSILON_RI_SIGNALING_PATHWAY	79	0.505026	1.62569	0.0014834	0.0215557	0.0176544	3935	tags=18%, list=11%, signal=17%	2206/5579/7409/4067/6300/5294/27040/3937/10451/207/5600/2885/3265/3265/6850/9846/5604/5580/7410/8398/5880/5335/10000/10000/3565/5595/4893
TOMLINS_PROSTATE_CANCER_UP	TOMLINS_PROSTATE_CANCER_UP	40	0.607281	1.75335	0.00149965	0.0217414	0.0178065	8237	tags=68%, list=23%, signal=53%	622/622/7358/2149/5479/1612/7873/6659/5987/5987/5987/5987/5987/5987/5987/23600/2078/64087/64087/64087/7764/8766/10611/8505/10330/10606/5987/5987/5987/5987/5987/5987/5987/5987/5987/5987/5987/5987/5987/5987/4646/2990/5987/5987/5987/5987/5987/5987/5987/1525/3875/821/821/1938/27044/9550/5987/5987/5987/5987/5987/5987/5987
ZWANG_DOWN_BY_2ND_EGF_PULSE	ZWANG_DOWN_BY_2ND_EGF_PULSE	260	-0.398133	-1.4389	0.00152842	0.0221074	0.0181062	6476	tags=25%, list=18%, signal=20%	5166/81932/1816/10902/443/134359/200765/25988/80055/79800/79842/118812/84914/157313/9132/8434/55758/284992/554282/10124/55070/55070/219844/1543/349152/349152/116115/148523/55635/136242/57730/163050/149420/51326/51326/51326/51326/206412/7633/119016/63908/5429/7581/10024/57452/23491/55294/151258/8341/9852/245/65125/100133315/100133315/100288742/79970/374877/57336/51380/390980/55139/6843/55840/28343…
SENGUPTA_NASOPHARYNGEAL_CARCINOMA_DN	SENGUPTA_NASOPHARYNGEAL_CARCINOMA_DN	349	-0.372743	-1.37803	0.00154002	0.0222239	0.0182016	6614	tags=38%, list=18%, signal=31%	80736/80736/80736/80736/80736/80736/80736/80736/80736/80736/80736/80736/80736/80736/80736/80736/80736/80736/80736/80736/80736/80736/80736/80736/119710/144406/83894/23120/8115/2938/1066/1066/7846/4477/56171/26160/59271/254956/90557/57530/84417/7802/9071/64446/1580/8470/4166/25854/8644/80237/55259/147798/147798/147798/147798/147798/147798/147798/147798/147798/147798/116844/374618/80736/80736/80736/…
ONO_AML1_TARGETS_UP	ONO_AML1_TARGETS_UP	24	-0.707184	-1.75635	0.0015447	0.0222401	0.018215	3950	tags=40%, list=11%, signal=36%	4818/84868/3725/1655/5133/5133/8788/2353/5997/4616
ACEVEDO_LIVER_TUMOR_VS_NORMAL_ADJACENT_TISSUE_DN	ACEVEDO_LIVER_TUMOR_VS_NORMAL_ADJACENT_TISSUE_DN	273	-0.399366	-1.44755	0.00156183	0.0224352	0.0183747	4415	tags=34%, list=12%, signal=30%	2819/51109/5624/10299/6397/3394/10013/8140/256764/3931/8425/8702/5104/7994/9719/64284/3483/5364/79054/1559/5745/8870/8870/8870/8870/8870/8870/83452/2690/4547/389084/55876/957/22863/28992/54386/5256/1577/9388/23166/3083/22809/2642/2642/3950/84680/51085/341405/4929/54825/388886/9172/9172/26512/35/2166/3699/8631/4239/1969/7433/8858/2353/79777/1571/554235/23645/375775/718/11185/54436/25837/10841/1084…
KEGG_APOPTOSIS	KEGG_APOPTOSIS	86	0.493556	1.62034	0.00156765	0.0224672	0.0184009	5527	tags=22%, list=15%, signal=19%	1439/11213/5294/7132/5576/9941/840/5530/207/4790/3654/5567/5573/8772/1676/8797/842/317/596/839/10000/10000/8795/331/841/9131/2021/836/8737/5534/7186/5613/8837/5295
RAY_ALZHEIMERS_DISEASE	RAY_ALZHEIMERS_DISEASE	11	0.847422	1.77982	0.00157421	0.0225097	0.0184357	138	tags=3%, list=0%, signal=3%	1435/3576
REACTOME_RNA_POLYMERASE_I_TRANSCRIPTION_TERMINATION	REACTOME_RNA_POLYMERASE_I_TRANSCRIPTION_TERMINATION	31	0.650431	1.77269	0.0015931	0.0226763	0.0185722	7663	tags=75%, list=21%, signal=59%	284119/1022/1022/2968/2968/2968/2968/2968/2968/2068/221830/5435/25885/2965/2965/84172/64425/5434/9533/2968/2968/2968/2968/2968/2968/2968/2968/2968/2968/2968/2968/30834/30834/30834/30834/30834/30834/30834/30834/30834/30834/30834/30834/30834/30834/30834/30834/30834/30834/30834/30834/30834/30834/30834/30834/30834/30834/30834/30834/30834/30834/30834/30834/404672/2968/2968/2968/2968/2968/2968/5437/901…
LINDGREN_BLADDER_CANCER_WITH_LOH_IN_CHR9Q	LINDGREN_BLADDER_CANCER_WITH_LOH_IN_CHR9Q	116	0.456913	1.56984	0.00159199	0.0226763	0.0185722	5524	tags=40%, list=15%, signal=34%	3709/7464/22954/5588/23071/48/11046/11046/2790/2776/81873/81704/57720/6595/9128/6418/138639/7507/92400/55032/10952/85365/51490/5537/1861/64768/91283/2733/54187/84641/3796/203197/7046/5683/157695/5695/23137/403341/23064/4507/445/124936/2021/5887/11064/5711/51552
REACTOME_TRANSCRIPTIONAL_REGULATION_BY_RUNX2	REACTOME_TRANSCRIPTIONAL_REGULATION_BY_RUNX2	119	0.442357	1.52656	0.00162118	0.0230237	0.0188567	4991	tags=55%, list=14%, signal=47%	25925/865/5698/5698/5698/5698/5698/5698/5698/5698/5698/5698/5698/5698/5698/5698/5698/5698/7525/5698/5698/5698/5698/5698/5698/5698/5698/5698/5698/5698/5698/5698/5698/5698/5698/5698/5698/5698/5698/5698/5698/5698/5698/5696/5696/5696/5696/5696/5696/5696/5696/207/8454/5696/5696/5696/5696/5696/5696/5696/5696/5696/5696/5696/5696/5696/5696/5696/5696/5696/5696/5696/5696/5696/5696/5696/5696/5696/5696/5696/…
BIOCARTA_MHC_PATHWAY	BIOCARTA_MHC_PATHWAY	14	0.78764	1.77988	0.00163226	0.0231286	0.0189426	6009	tags=56%, list=17%, signal=47%	5698/5698/5698/5698/5698/5698/5698/5698/5698/5698/5698/5698/5698/5698/5698/5698/5698/5698/5698/5698/5698/5698/5698/5698/5698/5698/5698/5698/5698/5698/5698/5698/5698/5698/5698/5698/5698/5698/5698/5698/6890/6890/6890/6890/6890/6890/6890/6890/5696/5696/5696/5696/5696/5696/5696/5696/6891/6891/6891/6891/6891/6891/6891/6891/6891/6891/6891/6891/6891/6891/6891/6891/6891/6891/6891/6891/6891/6891/6891/6891…
WP_HEPATITIS_B_INFECTION	WP_HEPATITIS_B_INFECTION	152	0.419851	1.49916	0.00164401	0.0231978	0.0189993	7478	tags=29%, list=21%, signal=23%	5579/3576/6300/7048/9641/537/7529/353376/6776/4214/7040/207/4790/5600/3654/2885/8772/3265/3265/842/4772/5604/317/596/6774/4088/4775/10000/10000/3454/7534/148022/114609/64764/7187/23586/5595/4893/7046/841/6773/6885/836/3716/5295/5601/1388/1388/1388/1388/10488/3339/2002/4087/581/5578/5594/10971/29110/7297/51135/1642/6777/3661/54205/369/1959
MULLIGHAN_MLL_SIGNATURE_1_DN	MULLIGHAN_MLL_SIGNATURE_1_DN	236	0.384169	1.43313	0.00164455	0.0231978	0.0189993	4297	tags=37%, list=12%, signal=33%	6160/1936/1936/5746/5024/6915/5089/5089/5089/5089/5089/5089/5089/374/9736/862/10633/5089/5089/5089/5089/5089/5089/5089/8938/5089/5089/5089/5089/5089/5089/5089/5831/1152/6541/79712/54847/10301/900/55616/55616/9541/55876/274/4585/4585/4585/4585/4585/4585/4585/4585/64798/2524/5089/5089/5089/5089/5089/5089/5089/51380/10395/10395/6560/7041/2040/861/8027/481/4016/23142/23263/5366/6886/388/81558/9374/93…
NADLER_OBESITY_UP	NADLER_OBESITY_UP	59	0.548333	1.68961	0.00165595	0.0233061	0.019088	759	tags=22%, list=2%, signal=21%	822/1520/7171/2316/7805/4240/3059/5216/4282/4282/53827/8682/7163/1072
SIG_BCR_SIGNALING_PATHWAY	SIG_BCR_SIGNALING_PATHWAY	46	0.575122	1.70582	0.00169502	0.0238025	0.0194945	1429	tags=21%, list=4%, signal=20%	10211/10211/10211/10211/10211/10211/10211/10211/10211/10211/10211/10211/10211/10211/10211/10211/10211/10211/10211/10211/10211/10211/10211/10211
WP_MITOCHONDRIAL_COMPLEX_IV_ASSEMBLY	WP_MITOCHONDRIAL_COMPLEX_IV_ASSEMBLY	34	0.628514	1.75885	0.00169969	0.0238147	0.0195045	8967	tags=60%, list=25%, signal=45%	25953/51241/80775/152100/388753/4513/4514/51204/9377/1345/1353/285521/1337/1351/1327/1329/28958/1352/116228/1355/1347
HELLER_HDAC_TARGETS_SILENCED_BY_METHYLATION_UP	HELLER_HDAC_TARGETS_SILENCED_BY_METHYLATION_UP	444	-0.360407	-1.3521	0.00171568	0.023985	0.019644	6352	tags=25%, list=18%, signal=21%	5441/3679/84162/3117/3117/3117/3117/3117/3117/3117/3117/3117/3117/3117/3117/3117/3117/2261/7846/9479/4208/2625/7168/5217/5209/3977/9787/10472/2896/8444/4758/4758/4758/4758/4758/4758/4758/4758/8290/8290/55512/8644/5176/5176/5467/2934/3728/8913/2537/23208/28971/5447/7091/6490/1515/55740/2512/3303/3303/3303/3303/3303/220/8347/1543/3117/3117/3117/3117/3117/3117/3117/3117/3117/3117/3117/3117/3117/3117…
WP_EUKARYOTIC_TRANSCRIPTION_INITIATION	WP_EUKARYOTIC_TRANSCRIPTION_INITIATION	41	0.597909	1.72131	0.0017284	0.0240555	0.0197017	6175	tags=56%, list=17%, signal=47%	1022/1022/2968/2968/2968/2968/2968/2968/2068/5435/5436/171568/2958/25885/2965/2965/84172/5431/55703/64425/51728/728340/728340/728340/728340/5434/6877/2961/2968/2968/2968/2968/2968/2968/2968/2968/2968/2968/2968/2968/5432/2968/2968/2968/2968/2968/2968/5437/661/6884
WAMUNYOKOLI_OVARIAN_CANCER_LMP_UP	WAMUNYOKOLI_OVARIAN_CANCER_LMP_UP	267	0.373327	1.41301	0.00172713	0.0240555	0.0197017	3119	tags=18%, list=9%, signal=16%	55286/8870/8870/8870/8870/8870/8870/2673/3429/3429/79152/2810/100133941/5349/2524/54836/7335/2065/2801/63027/64787/158158/79838/79144/50848/56913/481/11094/11094/2872/7264/7264/2122/1999/55466/688/80004/23582/7277/64073/3613/27106/122416/8870/8870/8870/8870/8870/8870/8870/8870/8870/8870/8870/8870/8870/8870/8870/8870/8870/8870/8870/8870/8870/8870/8870/8870/3300
PUIFFE_INVASION_INHIBITED_BY_ASCITES_DN	PUIFFE_INVASION_INHIBITED_BY_ASCITES_DN	146	0.42136	1.49894	0.00176129	0.0244165	0.0199974	7303	tags=43%, list=20%, signal=34%	2650/6526/3576/5480/138151/1022/1022/56034/9683/79921/2593/6659/9987/60436/9202/54537/23429/23429/22876/1316/22800/25926/27309/56947/55862/64746/51100/93081/25978/8883/54680/51691/22928/9140/1717/8520/64431/10190/120526/25843/2526/9107/10153/57862/4528/10286/64778/1069/29083/29982/5000/5876/10671/7336/444/7769/5796/5796/9474/58486/23029/60481/64318/57826/3177
HELLER_HDAC_TARGETS_DN	HELLER_HDAC_TARGETS_DN	292	0.363842	1.39688	0.00176214	0.0244165	0.0199974	3474	tags=16%, list=10%, signal=15%	397/10874/1512/752/10788/1043/7805/79623/6282/10659/3561/288/9454/7456/2171/5026/5788/5788/5788/5788/5214/399/81539/2923/9601/55612/7184/2139/4033/9749/57099/80774/7324/1075/65999/79071/3693/55179/2629/2629/1997/4602/8454/23598/51465/51491/3654/80342/8439/595/7371/55619/22882/6418/4242/23189/596/29103/55110/60528/3309/51154/471/8602/1984/1984/28986/81029/25864/56902/2971/55256/55256
REACTOME_FOXO_MEDIATED_TRANSCRIPTION	REACTOME_FOXO_MEDIATED_TRANSCRIPTION	66	-0.544425	-1.66732	0.00180193	0.0249128	0.0204039	3936	tags=28%, list=11%, signal=25%	3630/208/10018/2810/2908/23410/5105/8850/1649/6794/847/9314/10628/1647/27113/694/2309/1026/604
KEGG_RNA_DEGRADATION	KEGG_RNA_DEGRADATION	57	0.540623	1.65507	0.00182242	0.0251406	0.0205905	8276	tags=59%, list=23%, signal=45%	2023/10200/29883/51010/22803/22894/51690/167227/9125/54512/51691/246175/27257/11157/87178/23404/23658/25804/27258/23517/6499/6499/6499/6499/6499/6499/5394/4850/118460/57819/57819/57819/57819/57819/57819/57819/57819/57819/57819/57819/57819/57819/57819/57819/57819/57819/57819/57819/57819/57819/57819/57819/57819/28960/23019/56915/55802/57819/57819/57819/57819/57819/57819/4849/4849/4849/4849/4849/484…
BONOME_OVARIAN_CANCER_SURVIVAL_OPTIMAL_DEBULKING	BONOME_OVARIAN_CANCER_SURVIVAL_OPTIMAL_DEBULKING	234	0.379747	1.41312	0.00184144	0.0253472	0.0207597	3653	tags=23%, list=10%, signal=21%	301/7177/4038/10788/4061/4061/11120/8826/55013/8859/8859/8859/8859/8859/8859/3385/1192/1192/1192/1192/1192/1192/1192/1192/1192/1192/1192/1192/1192/1192/1192/1192/1192/1192/1192/1192/1192/1192/1192/1192/1192/1192/1192/1192/1192/1192/1192/1192/1192/1192/1192/1192/1192/1192/1192/1192/1192/1192/10109/55333/9749/57446/54918/8645/5325/54662/126298/8673/8936/84220/10157/6697/163131/163131/80022/9889/552…
VARELA_ZMPSTE24_TARGETS_UP	VARELA_ZMPSTE24_TARGETS_UP	42	-0.618151	-1.74537	0.00187146	0.0257039	0.0210518	2295	tags=28%, list=6%, signal=26%	6004/51274/54541/2872/467/10628/1647/1026/4616/7832/10912/10458
ZHAN_MULTIPLE_MYELOMA_CD1_AND_CD2_DN	ZHAN_MULTIPLE_MYELOMA_CD1_AND_CD2_DN	53	0.558217	1.7041	0.00188253	0.0257352	0.0210774	2577	tags=62%, list=7%, signal=58%	1439/4689/4689/26060/55819/81618/5026/83636/1445/6891/6891/6891/6891/6891/6891/6891/6891/6891/6891/6891/6891/6891/6891/6891/6891/6891/6891/6891/6891/6891/6891/6891/6891/6891/6891/6891/6891/6891/6891/6891/6891/6891/6891/6891/6891/6891/6891/6891/6891/6891/6891/6891/6891/6891/6891/6891/6891/6891/6891/6891/6891/6891/6891/6891/6891/6891/6891/6891/6891/6891/6891/6891/6891
ZWANG_CLASS_3_TRANSIENTLY_INDUCED_BY_EGF	ZWANG_CLASS_3_TRANSIENTLY_INDUCED_BY_EGF	217	-0.416607	-1.47912	0.00188355	0.0257352	0.0210774	3592	tags=31%, list=10%, signal=28%	3097/79660/79660/10140/2355/1364/1326/330/8870/8870/8870/8870/8870/8870/2113/57494/57132/57018/168455/3726/132864/10395/10395/1839/10150/23135/4929/861/51274/51621/51621/677/220213/1397/57162/80149/85450/1969/9021/2353/3557/1999/23764/133/22936/5187/467/9314/23645/56261/8870/8870/8870/8870/8870/8870/8870/8870/8870/8870/8870/8870/8870/8870/8870/8870/8870/8870/8870/8870/8870/8870/8870/8870/10769/57…
GINESTIER_BREAST_CANCER_20Q13_AMPLIFICATION_DN	GINESTIER_BREAST_CANCER_20Q13_AMPLIFICATION_DN	172	0.396771	1.4279	0.00188607	0.0257352	0.0210774	6880	tags=39%, list=19%, signal=32%	11120/837/7919/7919/7919/7919/7919/7919/7919/7919/54520/23151/2889/7916/7916/7916/7916/7916/7916/7916/11021/7919/7919/7919/7919/7919/7919/7919/7919/6949/10919/10919/10919/10919/10919/10919/10919/80774/56882/192670/79691/100131017/8525/6046/6046/6046/6046/6046/6046/6046/10919/10919/10919/10919/10919/10919/10919/10919/10919/10919/10919/10919/10919/10919/9962/54619/55862/155400/6418/9711/7917/7917/7…
PID_CD8_TCR_PATHWAY	PID_CD8_TCR_PATHWAY	51	0.556466	1.69226	0.00190462	0.0259059	0.0212172	5139	tags=40%, list=14%, signal=34%	5579/7409/5777/27040/5788/5788/5788/5788/3937/5588/1445/207/10892/567/567/2885/3265/3265/5335/919/867/3105/3105/3105/3105/3105/3105/3105/3105/4893/3105/3105/3105/3105/3105/3105/3105/3105/8915/3105/3105/3105/3105/3105/3105/3105/3105/5551
POOLA_INVASIVE_BREAST_CANCER_UP	POOLA_INVASIVE_BREAST_CANCER_UP	284	0.355061	1.35458	0.00190685	0.0259059	0.0212172	1178	tags=4%, list=3%, signal=4%	1439/1520/28797/1794/5579/1043/7805/8530/64092/6646/5552/3059/3561/28638/55165/5788/5788/5788/5788/3937/55843/10911/4033/969/3965/1075/27132/11015/1462/5341/586
KUWANO_RNA_STABILIZED_BY_NO	KUWANO_RNA_STABILIZED_BY_NO	7	-0.915066	-1.72146	0.00191873	0.0259547	0.0212572	1238	tags=75%, list=3%, signal=72%	3399/3399/7071/3162/5997/4616
HALLMARK_FATTY_ACID_METABOLISM	HALLMARK_FATTY_ACID_METABOLISM	157	0.41438	1.48509	0.00191588	0.0259547	0.0212572	5204	tags=32%, list=15%, signal=27%	3248/7358/1718/216/1429/4282/4282/3956/3939/3939/2752/6281/5092/6611/2182/873/4056/4056/4199/2820/3157/3028/1376/1892/131076/23417/4913/39/2271/3033/26275/51166/10965/594/51478/33/58505/34/2194/54884/1666/226/224/23173/4191/8801/30/3015/1056/1738/9380/4190/3420
WP_REGUCALCIN_IN_PROXIMAL_TUBULE_EPITHELIAL_KIDNEY_CELLS	WP_REGUCALCIN_IN_PROXIMAL_TUBULE_EPITHELIAL_KIDNEY_CELLS	33	0.63799	1.77102	0.001923	0.0259563	0.0212585	6633	tags=51%, list=18%, signal=42%	7132/5588/7040/207/842/578/317/90550/7046/841/2865/836/5534/10146/2475/4087/581/5594
PARK_APL_PATHOGENESIS_UP	PARK_APL_PATHOGENESIS_UP	14	0.783397	1.77029	0.00194502	0.026085	0.0213639	1096	tags=55%, list=3%, signal=54%	301/9168/5698/5698/5698/5698/5698/5698/5698/5698/5698/5698/5698/5698/5698/5698/5698/5698/5698/5698/5698/5698/5698/5698/5698/5698/5698/5698/5698/5698/5698/5698/5698/5698/5698/5698/5698/5698/5698/5698/5698/5698/6659
ZHONG_SECRETOME_OF_LUNG_CANCER_AND_MACROPHAGE	ZHONG_SECRETOME_OF_LUNG_CANCER_AND_MACROPHAGE	76	0.511752	1.63842	0.00194238	0.026085	0.0213639	5895	tags=28%, list=16%, signal=23%	3487/1512/2023/3939/3939/1471/60/5479/22883/975/5037/8804/5230/1854/2806/154881/65979/10036/5685/302/7534/351/629/629/629/629/629/629/629/629/629/629/629/629/629/629/5688/226/4191/5687/5695/994/3959/5694/4190/3326/5901/64852/64852
BLANCO_MELO_COVID19_BRONCHIAL_EPITHELIAL_CELLS_SARS_COV_2_INFECTION_UP	BLANCO_MELO_COVID19_BRONCHIAL_EPITHELIAL_CELLS_SARS_COV_2_INFECTION_UP	143	-0.450149	-1.52919	0.00194368	0.026085	0.0213639	3268	tags=20%, list=9%, signal=19%	629/629/629/629/629/629/629/4050/4050/4050/4050/4050/4050/4050/4050/1326/330/6289/8870/8870/8870/8870/8870/8870/6278/171177/55332/114897/7784/54509/716/101/1839/221416/3665/3665/4792/10938/91107/80149/57115/9021/10381/1295/9435/23764/1942/3656/154/718/10379/10379/5155/8870/8870/8870/8870/8870/8870/8870/8870/8870/8870/8870/8870/8870/8870/8870/8870/8870/8870/8870/8870/8870/8870/8870/8870/27289/2376…
LIN_NPAS4_TARGETS_UP	LIN_NPAS4_TARGETS_UP	169	0.41058	1.48079	0.00195601	0.0261762	0.0214386	7969	tags=57%, list=22%, signal=45%	440730/2034/1718/6646/205/23151/9371/145773/3133/3133/3133/3133/3133/3133/3133/3133/3133/3133/3133/3133/3133/3133/3133/3133/3133/3133/3133/3133/3133/3133/3133/3133/3133/3133/3133/3133/9926/57587/54700/54700/24145/3705/3705/57415/134957/4298/91782/10007/9653/128866/26017/283578/26135/25978/286046/64395/125228/6992/6992/6992/6992/6992/6992/6992/6992/1827/10000/10000/51439/6197/23/23/23/23/23/23/23/…
YAO_TEMPORAL_RESPONSE_TO_PROGESTERONE_CLUSTER_5	YAO_TEMPORAL_RESPONSE_TO_PROGESTERONE_CLUSTER_5	30	-0.680488	-1.77981	0.00196485	0.0261827	0.021444	3471	tags=73%, list=10%, signal=66%	3303/3303/3303/3303/3303/7498/9099/3303/3303/3303/3303/3303/8870/8870/8870/8870/8870/8870/1306/84707/7422/3303/3303/3303/3303/3303/3934/3303/3303/3303/3303/3303/5105/133/1571/5187/467/9314/7071/3784/3784/3669/8870/8870/8870/8870/8870/8870/8870/8870/8870/8870/8870/8870/8870/8870/8870/8870/8870/8870/8870/8870/8870/8870/8870/8870
GALE_APL_WITH_FLT3_MUTATED_UP	GALE_APL_WITH_FLT3_MUTATED_UP	59	0.546022	1.68248	0.00196301	0.0261827	0.021444	7504	tags=48%, list=21%, signal=38%	7456/8835/23526/23180/9781/5325/10434/22876/3837/22800/9221/4363/4363/50628/9894/9812/8776/1665/55127/81688/55695/545/9582/9488/84934/51542/3187/3187/23395/23080
OKUMURA_INFLAMMATORY_RESPONSE_LPS	OKUMURA_INFLAMMATORY_RESPONSE_LPS	175	0.411587	1.48368	0.00197523	0.026265	0.0215114	6690	tags=43%, list=19%, signal=35%	9173/3576/10220/11001/7490/114908/8323/25898/23682/943/6776/8879/4199/6659/9466/9466/51101/7247/375449/51491/54535/54535/54535/54535/54535/54535/54535/54535/54535/54535/54535/54535/54103/80014/221830/2280/65108/8202/116496/84302/10407/10407/10407/1964/23600/79155/55619/1052/378708/214/54535/54535/54535/54535/54535/54535/3954/9367/4088/3488/9467/10000/10000/10102/51133/55027/7421/29990/1236/860/45…
PID_RAC1_REG_PATHWAY	PID_RAC1_REG_PATHWAY	38	0.611627	1.74802	0.00198428	0.0263295	0.0215642	6267	tags=51%, list=17%, signal=42%	1794/50619/7409/57580/4168/57572/9844/396/29/29/29/613/10451/392/7410/9459/10928/55114/55114/10006/221178/221178/221178/5879
REACTOME_SIGNALING_BY_NOTCH4	REACTOME_SIGNALING_BY_NOTCH4	81	0.490349	1.59037	0.0019897	0.0263457	0.0215774	4991	tags=51%, list=14%, signal=45%	5698/5698/5698/5698/5698/5698/5698/5698/5698/5698/5698/5698/5698/5698/5698/5698/5698/5698/5698/5698/5698/5698/5698/5698/5698/5698/5698/5698/5698/5698/5698/5698/5698/5698/5698/5698/5698/5698/5698/5698/83464/4853/5696/5696/5696/5696/5696/5696/5696/5696/207/51107/8454/5696/5696/5696/5696/5696/5696/5696/5696/5696/5696/5696/5696/5696/5696/5696/5696/5696/5696/5696/5696/5696/5696/5696/5696/5696/5696/569…
BILANGES_RAPAMYCIN_SENSITIVE_VIA_TSC1_AND_TSC2	BILANGES_RAPAMYCIN_SENSITIVE_VIA_TSC1_AND_TSC2	69	0.516329	1.63553	0.00201652	0.0266445	0.0218221	4297	tags=39%, list=12%, signal=34%	7431/203068/203068/203068/203068/203068/203068/203068/203068/1429/140707/5269/5479/7416/2992/5496/654364/498/8260/10175/84838/203068/203068/203068/203068/203068/203068/203068/203068/203068/203068/203068/203068/203068/203068/203068/203068/203068/203068/203068/203068/203068/203068/203068/203068/203068/203068/203068/203068/203068/203068/203068/203068/203068/203068/203068/203068/203068/203068/203068/…
KRIGE_AMINO_ACID_DEPRIVATION	KRIGE_AMINO_ACID_DEPRIVATION	29	-0.670235	-1.74246	0.00202694	0.0267257	0.0218887	2281	tags=48%, list=6%, signal=45%	22809/7422/1491/440/1051/54541/83667/83667/23657/1649/467/23645/1647/79094/1026
WP_HEME_BIOSYNTHESIS	WP_HEME_BIOSYNTHESIS	9	-0.877259	-1.76728	0.00204179	0.0268649	0.0220027	2411	tags=89%, list=7%, signal=83%	7389/2235/1371/3145/7390/5498/210/212
ONDER_CDH1_TARGETS_2_DN	ONDER_CDH1_TARGETS_2_DN	466	-0.357288	-1.34703	0.00207233	0.0272097	0.0222851	5026	tags=27%, list=14%, signal=24%	3983/10974/360/55117/3853/1515/1272/1040/220/1832/1543/2729/64761/259173/1437/79365/10512/55287/771/3914/374/3985/7378/3897/5803/55214/55107/54972/3909/7498/8140/653145/2774/1952/6382/8702/5590/2196/50649/64284/3783/999/2824/5364/5652/9536/4050/4050/4050/4050/4050/4050/4050/4050/1364/330/8870/8870/8870/8870/8870/8870/2643/6405/9429/83439/6278/6535/84830/3772/2810/100133941/1474/5349/6337/79651/56…
NIKOLSKY_BREAST_CANCER_21Q22_AMPLICON	NIKOLSKY_BREAST_CANCER_21Q22_AMPLICON	15	-0.782692	-1.76163	0.00213416	0.0277885	0.0227591	2680	tags=61%, list=7%, signal=57%	5116/4047/4047/23181/1291/54058/80781/10841/10841/84221/84221
WP_PROXIMAL_TUBULE_TRANSPORT	WP_PROXIMAL_TUBULE_TRANSPORT	57	-0.56017	-1.67483	0.00213214	0.0277885	0.0227591	8930	tags=48%, list=25%, signal=36%	486/11136/762/525/64849/6582/6505/6524/55244/6528/760/10257/146802/142680/10864/6519/9376/55867/54716/6569/9429/348932/6520/6560/481/23428/340024/6513/358
WP_ELECTRON_TRANSPORT_CHAIN_OXPHOS_SYSTEM_IN_MITOCHONDRIA	WP_ELECTRON_TRANSPORT_CHAIN_OXPHOS_SYSTEM_IN_MITOCHONDRIA	103	0.477381	1.6128	0.00212161	0.0277885	0.0227591	9861	tags=67%, list=27%, signal=49%	4718/4708/522/518/6341/4717/498/4513/4706/4514/4712/4707/6390/4509/7388/10632/4537/7386/4704/9377/1345/1353/27089/7384/4702/55967/4709/506/1337/517/1351/4725/4722/4722/6392/291/4710/509/4694/6389/4714/513/1327/4731/9551/515/4715/1329/6391/4713/539/4541/4726/4508/4729/1355/4698/4716/29796/1347/4720/4700/4700/4700/4700/4700/4700/4700/4700/4700/4700/4700/4700/4700/4700/4700/4723/4696/4696/4696/4696/…
HALLMARK_INTERFERON_ALPHA_RESPONSE	HALLMARK_INTERFERON_ALPHA_RESPONSE	97	0.469956	1.57432	0.00213184	0.0277885	0.0227591	6009	tags=60%, list=17%, signal=50%	8519/4061/4061/1435/3566/129607/7726/7726/7726/7726/7726/7726/7726/7726/10581/23424/54809/5698/5698/5698/5698/5698/5698/5698/5698/3574/5698/5698/5698/5698/5698/5698/5698/5698/5698/5698/5698/5698/5698/5698/5698/5698/5698/5698/5698/5698/5698/5698/5698/5698/5698/5698/5698/5698/5698/5698/5698/5698/9636/6890/6890/6890/6890/6890/6890/6890/6890/5696/5696/5696/5696/5696/5696/5696/5696/1997/567/567/5696/5…
DESERT_PERIPORTAL_HEPATOCELLULAR_CARCINOMA_SUBCLASS_UP	DESERT_PERIPORTAL_HEPATOCELLULAR_CARCINOMA_SUBCLASS_UP	158	-0.440536	-1.51779	0.00215631	0.0280186	0.0229476	8737	tags=43%, list=24%, signal=32%	6718/64850/715/715/1776/55222/1807/1373/929/2538/26999/5106/5106/6505/2158/9848/10020/1407/6580/5244/27165/8856/1556/443/2938/51733/57817/2110/25854/64081/290/10864/335/64577/5340/2819/635/32/8608/10747/55107/3273/56605/6554/3931/3479/3263/18/3483/3700/1559/2643/83439/3781/2690/3960/3960/1491/1579/24146/5105/319/7433/116285/189/2180/1647/10841/10841/6694/383
KEGG_B_CELL_RECEPTOR_SIGNALING_PATHWAY	KEGG_B_CELL_RECEPTOR_SIGNALING_PATHWAY	75	0.508817	1.62405	0.00224181	0.0290693	0.0238081	5538	tags=40%, list=15%, signal=34%	8519/5579/7409/4067/5777/5294/5530/975/10451/207/4790/4794/10892/4793/4793/2885/3265/3265/6850/4772/5604/7410/5880/4775/10000/10000/5595/4893/8915/695/5534/5295/5336
LEE_EARLY_T_LYMPHOCYTE_DN	LEE_EARLY_T_LYMPHOCYTE_DN	56	0.531249	1.62089	0.00224771	0.0290856	0.0238214	1304	tags=20%, list=4%, signal=20%	347902/8519/87/8635/3566/288/10365/10581/57134/25939/79814/3133/3133/3133/3133/3133/3133/3133/3133/3133/3133/3133/3133/3133/3133/3133/3133/3133/3133/3133/3133/3133/3133/3133/3133/3133/3133/3133/3133/4214/3134/3134/3134/3134/3134/3134/3134/9882/9466/9466/79961
SMIRNOV_RESPONSE_TO_IR_2HR_UP	SMIRNOV_RESPONSE_TO_IR_2HR_UP	51	-0.576743	-1.68095	0.00225534	0.0291242	0.023853	3088	tags=32%, list=9%, signal=29%	8870/8870/8870/8870/8870/8870/1195/6004/6236/8744/5366/23657/51278/688/467/23645/1647/27113/7779/8870/8870/8870/8870/8870/8870/8870/8870/8870/8870/8870/8870/8870/8870/8870/8870/8870/8870/8870/8870/8870/8870/8870/8870/9518/10769/1026/6446
REACTOME_APOPTOTIC_EXECUTION_PHASE	REACTOME_APOPTOTIC_EXECUTION_PHASE	52	0.568103	1.72992	0.00228731	0.0294762	0.0241414	4968	tags=38%, list=14%, signal=32%	7431/5339/5588/28988/840/6709/3837/5062/51765/1676/4001/1829/10134/2339/5580/839/63967/841/6304/1499/836
REACTOME_FORMATION_OF_RNA_POL_II_ELONGATION_COMPLEX	REACTOME_FORMATION_OF_RNA_POL_II_ELONGATION_COMPLEX	58	0.536852	1.64722	0.00229777	0.0295502	0.0242019	7921	tags=66%, list=22%, signal=52%	1022/1022/2968/2968/2968/2968/2968/2968/6924/2068/4298/5435/5436/9646/2965/2965/22916/11198/6829/5431/6749/9150/9150/23168/8178/25920/6827/5434/4686/5433/123169/79577/2968/2968/2968/2968/2968/2968/2968/2968/2968/2968/2968/2968/85403/5432/404672/7469/2968/2968/2968/2968/2968/2968/5437/51497/6830/4331/7936/7936/7936/7936/7936/7936/7936/7936/7936/7936/7936/7936/7936/7936/7936/7936/7936/7936/7936/793…
COLDREN_GEFITINIB_RESISTANCE_UP	COLDREN_GEFITINIB_RESISTANCE_UP	85	0.498732	1.62711	0.00230335	0.0295612	0.024211	5782	tags=39%, list=16%, signal=33%	7188/23516/216/79047/4131/55352/23433/359845/359845/56652/27166/22984/121457/8439/10962/3416/8260/219/89927/89927/6832/22873/92609/84108/126321/9790/119032/9040/7345/83700/403/51593/83608/5442/79591
KAYO_AGING_MUSCLE_DN	KAYO_AGING_MUSCLE_DN	124	0.430693	1.4955	0.00232549	0.0297844	0.0243938	7055	tags=33%, list=20%, signal=27%	1512/7114/837/9168/10473/7490/3915/81614/4790/2782/5435/4351/522/518/7436/5436/2271/3033/5536/7360/5917/1312/498/3488/7156/7156/1965/6642/6390/6993/7388/6678/3614/23168/4012/9968/5687/8505/4190/7417/6515/1337/1351/5527/1012/509/223/2077/30836/5597/5919/91137/3382/6634/8761/6222/6222/6222/6222/6222/6222/4758/4758/4758/4758/4758/4758/4758/4758/4758/4758/4758/4758/4758/4758/4758/4758
MIKKELSEN_MEF_ICP_WITH_H3K27ME3	MIKKELSEN_MEF_ICP_WITH_H3K27ME3	203	-0.41682	-1.46879	0.00234706	0.0299992	0.0245697	861	tags=6%, list=2%, signal=6%	221692/80023/55349/9844/3133/3133/3133/3133/3133/3133/3133/3133/3133/3133/3133/3133/3133/3133/3133/3133/3133/3133/3133/3133/3133/3133/3133/3133/3133/3133/3133/3133/943
LAIHO_COLORECTAL_CANCER_SERRATED_UP	LAIHO_COLORECTAL_CANCER_SERRATED_UP	115	0.449607	1.53961	0.00235479	0.0300367	0.0246004	6866	tags=36%, list=19%, signal=29%	8826/23499/5480/3956/3915/3937/56034/10109/10130/6635/567/567/2004/5573/55041/1603/27020/4236/9685/25978/3183/9218/63931/9245/302/5710/55207/6678/8992/10611/5376/81611/4738/4738/54861/103910/2014/55505/51714/27258/56851/829/10776/8407/6925/665/6309/3091/2665/3312/9643/509/51324/2633/102/5321/23029
BROWNE_HCMV_INFECTION_30MIN_UP	BROWNE_HCMV_INFECTION_30MIN_UP	53	-0.556349	-1.63209	0.00243644	0.0308896	0.0252989	4437	tags=61%, list=12%, signal=54%	64591/10485/55937/55937/55937/55937/55937/55937/55937/2070/321/321/55937/55937/55937/55937/55937/55937/55937/55937/55937/55937/55937/55937/55937/55937/55937/55937/55937/55937/55937/55937/55937/55937/55937/55937/55937/55937/55937/55937/55937/55937/55937/55937/55937/55937/55937/3429/3429/23117/3455/3455/10144/7057/3726/1291/10444/57125/2185/5754/3934/388/9021/2353/9628/7538/1843
ZHOU_CELL_CYCLE_GENES_IN_IR_RESPONSE_6HR	ZHOU_CELL_CYCLE_GENES_IN_IR_RESPONSE_6HR	82	0.485076	1.58058	0.00243496	0.0308896	0.0252989	6825	tags=34%, list=19%, signal=28%	2171/55165/79077/51313/51002/4001/8208/4175/55110/4172/7398/5902/113115/1058/79832/9937/9319/2146/3149/8914/1841/113130/10606/26271/51184/4085/3832/6118/23234/672/4605/1017
WINNEPENNINCKX_MELANOMA_METASTASIS_UP	WINNEPENNINCKX_MELANOMA_METASTASIS_UP	159	0.409128	1.45994	0.00243109	0.0308896	0.0252989	8650	tags=46%, list=24%, signal=35%	55165/1266/6836/6836/6949/51022/79833/11137/203547/64983/3308/4175/4830/3309/56061/91283/11130/54187/5902/10574/29789/22948/84955/1058/79075/79801/4686/2956/27101/84319/64857/348235/8914/1841/113130/3838/9678/6637/10606/64969/25940/6728/26973/26973/29902/55119/10575/8467/990/51184/9833/219902/3832/26995/6747/10979/9015/3301/8886/56943/10527/7514/891/10989/4678/5111/699/1111/8833/8438/94239/51659/…
REACTOME_TRANSLATION_OF_REPLICASE_AND_ASSEMBLY_OF_THE_REPLICATION_TRANSCRIPTION_COMPLEX	REACTOME_TRANSLATION_OF_REPLICASE_AND_ASSEMBLY_OF_THE_REPLICATION_TRANSCRIPTION_COMPLEX	13	0.804298	1.78881	0.00245558	0.0310067	0.0253948	3417	tags=50%, list=10%, signal=45%	92421/91782/128866/8678/51652/25978/5289
GENTILE_UV_RESPONSE_CLUSTER_D7	GENTILE_UV_RESPONSE_CLUSTER_D7	37	0.611107	1.73997	0.00245549	0.0310067	0.0253948	8489	tags=75%, list=24%, signal=58%	3566/7132/5937/8454/5770/22800/1052/5580/5917/8226/8766/841/5376/5218/9813/57819/57819/57819/57819/57819/57819/57819/57819/57819/57819/57819/57819/57819/57819/57819/57819/57819/57819/57819/57819/57819/57819/57819/57819/57819/57819/57819/57819/57819/57819/4678/8405/57819/57819/57819/57819/57819/57819/4729/55837
CHO_NR4A1_TARGETS	CHO_NR4A1_TARGETS	32	-0.632478	-1.67715	0.0024646	0.0310579	0.0254368	3194	tags=38%, list=9%, signal=35%	330/5133/5133/6520/1491/2134/440/9709/3638/1649/467/23645/3162
REACTOME_NS1_MEDIATED_EFFECTS_ON_HOST_PATHWAYS	REACTOME_NS1_MEDIATED_EFFECTS_ON_HOST_PATHWAYS	41	0.589047	1.6958	0.00248135	0.0312062	0.0255583	8759	tags=57%, list=24%, signal=43%	9636/55706/3837/23636/5610/9883/8106/7175/9631/23279/10762/3838/5903/8480/10898/23165/9972/3840/55746/79023/6396/57122/79902/9688
SAKAI_TUMOR_INFILTRATING_MONOCYTES_DN	SAKAI_TUMOR_INFILTRATING_MONOCYTES_DN	81	0.48336	1.5677	0.00249667	0.0312711	0.0256114	6626	tags=50%, list=18%, signal=41%	30001/23499/5480/4258/5479/1022/1022/51022/967/3181/11218/5573/6629/5889/50628/2287/6426/6426/3309/5537/6636/1478/901/11157/5478/10935/10437/5686/79577/10923/7295/10694/2969/10575/11052/5901/998/51282/5693/9939/54926/10728/3301
CHIARADONNA_NEOPLASTIC_TRANSFORMATION_CDC25_UP	CHIARADONNA_NEOPLASTIC_TRANSFORMATION_CDC25_UP	123	0.434724	1.50483	0.00250045	0.0312711	0.0256114	5087	tags=28%, list=14%, signal=24%	9173/1435/837/288/8573/84293/2149/7184/9180/6566/6566/9500/5935/1462/10627/10447/27336/10813/10857/1052/5481/2958/3192/8091/3920/79050/79050/6558/8766/22928/81611/25819/54518/60559/79572/6431
LINDGREN_BLADDER_CANCER_CLUSTER_3_DN	LINDGREN_BLADDER_CANCER_CLUSTER_3_DN	224	0.37335	1.39615	0.00250148	0.0312711	0.0256114	5770	tags=28%, list=16%, signal=24%	9535/79026/1512/6809/81618/54843/837/4013/63940/63940/63940/63940/63940/63940/63940/2051/2051/2171/84293/51259/1022/1022/2137/7205/1265/285203/64780/975/4602/54947/375449/10087/64760/6638/3384/25943/84445/4869/10253/6297/392/595/79027/3265/3265/2746/9658/26275/5829/4088/388610/414/84962/8567/55644/81029/51078/390/6591/55127/4809/3987/9320/8106/29035/7582/5993/9790/9187/5826/140801/11047/80306/631…
GUILLAUMOND_KLF10_TARGETS_UP	GUILLAUMOND_KLF10_TARGETS_UP	49	-0.581857	-1.68264	0.00258873	0.0320419	0.0262427	5209	tags=33%, list=15%, signal=28%	23208/3560/1605/10864/1307/1952/7033/5832/6289/887/2040/440/3934/5105/90990/57035/10397
REACTOME_CYTOCHROME_P450_ARRANGED_BY_SUBSTRATE_TYPE	REACTOME_CYTOCHROME_P450_ARRANGED_BY_SUBSTRATE_TYPE	64	-0.5376	-1.62904	0.00258873	0.0320419	0.0262427	6933	tags=34%, list=19%, signal=28%	1589/1589/1589/1589/1589/1589/1580/1576/284541/126410/66002/5447/10499/1555/1583/1583/1543/6256/2232/4051/112812/1589/1589/1589/1589/1589/1589/1559/1591/54905/1577/1548/1579/57491/1572/9915/1549/1571
WP_NOVEL_INTRACELLULAR_COMPONENTS_OF_RIGILIKE_RECEPTOR_RLR_PATHWAY	WP_NOVEL_INTRACELLULAR_COMPONENTS_OF_RIGILIKE_RECEPTOR_RLR_PATHWAY	60	0.524718	1.62618	0.00257974	0.0320419	0.0262427	5144	tags=17%, list=14%, signal=15%	3576/6300/9641/9755/79671/9636/4214/340061/340061/4790/5600/4793/4793/8772/54941/7187/23586/841/9140/6885/8737/7186
CHAUHAN_RESPONSE_TO_METHOXYESTRADIOL_DN	CHAUHAN_RESPONSE_TO_METHOXYESTRADIOL_DN	103	0.473554	1.59987	0.00258504	0.0320419	0.0262427	1730	tags=12%, list=5%, signal=12%	7431/397/9516/5315/7114/10092/3059/9168/5777/3561/28638/8905/3956/6281/7184/7529/7317/1650/51465/1454/567/567/5230
REACTOME_EUKARYOTIC_TRANSLATION_ELONGATION	REACTOME_EUKARYOTIC_TRANSLATION_ELONGATION	93	-0.489586	-1.56851	0.00257593	0.0320419	0.0262427	9213	tags=66%, list=26%, signal=49%	6235/6208/11224/6194/1933/1933/6171/6142/6209/6230/6230/6167/6168/3921/6122/1915/6141/6231/6210/6202/6130/6130/6228/6175/6169/6173/6159/6170/6136/2197/6222/6222/6222/6222/6222/6222/6222/6222/6222/6222/6222/6222/6222/6222/6222/6222/6222/6222/6222/6222/6222/6222/6222/6222/6222/6222/6222/6222/6222/6222/6193/23521/6133/9045/6187/6161/51065/6156/25873/6181/6206/6189/6205/6223/6160/1936/1936/6134/6234/…
PID_ECADHERIN_NASCENT_AJ_PATHWAY	PID_ECADHERIN_NASCENT_AJ_PATHWAY	39	0.606321	1.74226	0.00264159	0.0326096	0.0267077	7610	tags=57%, list=21%, signal=45%	8826/2889/8907/382/3682/207/5908/595/7410/4830/1460/1460/1460/1460/1460/1460/1460/23396/4301/1499/387/1460/1460/1460/1460/1460/1460/1460/10006/1460/1460/1460/1460/1460/1460/1460/5295/10787/998/5879/1459/2017/2017/1398/1460/1460/1460/1460/1460/1460/1460
LEE_LIVER_CANCER_CIPROFIBRATE_DN	LEE_LIVER_CANCER_CIPROFIBRATE_DN	66	-0.535735	-1.64071	0.00264804	0.0326096	0.0267077	4997	tags=34%, list=14%, signal=29%	5407/27284/635/4942/5625/5625/18/7140/7140/26959/26959/7136/7136/3950/8418/51268/55224/5105/1572/1571/3242/763/3860/604/8991
CAIRO_LIVER_DEVELOPMENT_DN	CAIRO_LIVER_DEVELOPMENT_DN	223	-0.395811	-1.40792	0.00265542	0.0326096	0.0267077	6752	tags=29%, list=19%, signal=24%	2901/7629/5893/80736/80736/80736/80736/80736/80736/80736/80736/80736/80736/80736/80736/80736/80736/80736/80736/80736/80736/80736/80736/80736/80736/80736/80736/3117/3117/3117/3117/3117/3117/3117/3117/3117/3117/3117/3117/3117/3117/1066/1066/23506/3697/6480/2947/4124/2/2159/3249/6752/5265/5265/5176/5176/1361/2934/80736/80736/80736/80736/80736/80736/80736/80736/80736/80736/80736/80736/80736/80736/807…
WP_ALZHEIMERS_DISEASE	WP_ALZHEIMERS_DISEASE	262	0.359421	1.35731	0.00265078	0.0326096	0.0267077	5769	tags=32%, list=16%, signal=27%	1435/3709/6263/203068/203068/203068/203068/203068/203068/203068/203068/7132/8323/83464/2903/7416/840/60673/5530/207/51107/801/4790/2776/1454/3028/2597/8772/348/3265/3265/5690/842/55851/3708/5664/5684/8678/5604/5481/317/3416/10297/1965/5663/8883/5709/10000/10000/5685/5610/9451/81029/5710/5289/351/1460/1460/1460/1460/1460/1460/1460/5688/90550/203068/203068/203068/203068/203068/203068/203068/203068/…
REACTOME_TRANSCRIPTIONAL_REGULATION_BY_E2F6	REACTOME_TRANSCRIPTIONAL_REGULATION_BY_E2F6	33	0.629404	1.74718	0.00273684	0.0335437	0.0274727	2650	tags=33%, list=7%, signal=31%	6015/6015/6015/6015/6015/6015/4149/10919/10919/10919/10919/10919/10919/10919/23429/23429/8726/10919/10919/10919/10919/10919/10919/10919/10919/10919/10919/10919/10919/10919/10919/317/10919/10919/10919/10919/10919/10919/10919
FUNG_IL2_TARGETS_WITH_STAT5_BINDING_SITES	FUNG_IL2_TARGETS_WITH_STAT5_BINDING_SITES	7	0.90039	1.6964	0.00276989	0.0338824	0.0277501	1457	tags=5%, list=4%, signal=5%	3976/8835/51491
PID_TXA2PATHWAY	PID_TXA2PATHWAY	55	0.537816	1.64489	0.00277692	0.0339022	0.0277663	2962	tags=33%, list=8%, signal=31%	5579/4067/2769/5294/7525/2771/157/5588/54331/9138/207/5600/2776/2782/6850/2767/5580/156/407
FLECHNER_PBL_KIDNEY_TRANSPLANT_OK_VS_DONOR_UP	FLECHNER_PBL_KIDNEY_TRANSPLANT_OK_VS_DONOR_UP	153	0.409652	1.463	0.00280719	0.0342052	0.0280144	9140	tags=44%, list=25%, signal=33%	79026/7409/3561/9641/8859/8859/8859/8859/8859/8859/7155/60/1635/7416/9500/3965/23023/11118/6320/10959/23299/10226/1316/80342/5573/832/392/10440/3276/8725/10492/1660/5604/3920/498/6184/10102/5685/11329/8776/7534/10574/25920/6304/5683/9790/10423/10907/1107/5253/4682/5686/10525/10525/178/7295/5295/1082/10262/10865/79143/79143/79143/79143/79143/79143/79143/79143/79143/79143/57819/57819/57819/57819/57…
REACTOME_RHOD_GTPASE_CYCLE	REACTOME_RHOD_GTPASE_CYCLE	53	0.545025	1.66383	0.00284309	0.0345753	0.0283176	5527	tags=41%, list=15%, signal=35%	87/23344/1627/5361/79180/1729/120/144402/9590/832/392/4001/7879/3998/94134/1730/2909/9497/23592/55114/55114/5295
KEGG_VALINE_LEUCINE_AND_ISOLEUCINE_DEGRADATION	KEGG_VALINE_LEUCINE_AND_ISOLEUCINE_DEGRADATION	44	0.580245	1.70098	0.0028533	0.0346232	0.0283568	4751	tags=48%, list=13%, signal=42%	5019/217/3157/586/3028/1892/39/3033/26275/64064/594/27034/219/64087/64087/64087/587/34/4329/224/30/1738
HONMA_DOCETAXEL_RESISTANCE	HONMA_DOCETAXEL_RESISTANCE	35	0.593572	1.67377	0.00286219	0.0346232	0.0283568	5864	tags=76%, list=16%, signal=64%	203068/203068/203068/203068/203068/203068/203068/203068/2023/6281/2950/1072/2597/6185/64968/3309/56005/201562/10459/203068/203068/203068/203068/203068/203068/203068/203068/203068/203068/203068/203068/203068/203068/203068/203068/203068/203068/203068/203068/203068/203068/203068/203068/203068/203068/203068/203068/203068/203068/203068/203068/203068/203068/203068/203068/203068/203068/203068/203068/203…
HALLMARK_G2M_CHECKPOINT	HALLMARK_G2M_CHECKPOINT	198	0.380847	1.40036	0.00286361	0.0346232	0.0283568	9264	tags=44%, list=26%, signal=33%	81539/10419/4853/4212/7040/8454/6632/3837/1871/3925/10951/993/595/7371/4001/4691/10492/9221/3192/4175/4172/6426/6426/4088/10036/6599/6558/6839/1058/3184/10212/3015/6421/994/5119/2146/3149/5887/51155/1841/10762/3838/1810/899/10664/10146/3799/23047/3091/26271/3312/990/4085/3832/6118/22823/5885/4331/4605/7514/5347/2935/3609/5976/23649/23649/10051/3619/4953/4678/699/1111/4502/10460/8438/22974/26255/9…
YAGI_AML_WITH_INV_16_TRANSLOCATION	YAGI_AML_WITH_INV_16_TRANSLOCATION	406	0.334744	1.31725	0.00288514	0.0348162	0.0285149	6668	tags=30%, list=19%, signal=25%	6222/6222/6222/6222/6222/6222/3142/1014/6222/6222/6222/6222/6222/6222/6222/6222/6222/6222/6222/6222/6222/6222/6222/6222/6222/6222/6222/6222/6222/6222/6222/6222/6570/1033/7316/23521/5411/6161/2066/5452/51304/6456/3667/6538/8848/6181/23274/8076/51/290/6872/6160/5607/5407/26575/3303/3303/3303/3303/3303/8013/57213/23041/4330/1346/11176/22861/6867/364/5554/5554/5554/5554/5554/6218/6218/6232/9727/9727/…
DARWICHE_SKIN_TUMOR_PROMOTER_UP	DARWICHE_SKIN_TUMOR_PROMOTER_UP	139	0.410283	1.45318	0.00289627	0.0348834	0.0285699	3365	tags=25%, list=9%, signal=22%	3976/4061/4061/129607/23597/9454/2023/5480/3939/3939/399/393/7529/5223/2629/2629/3654/558/84557/55509/9689/5230/5211/55969/4691/29101/9711/27436/1994/10767/3416/6426/6426/6723/55651/55234/116985
SOTIRIOU_BREAST_CANCER_GRADE_1_VS_3_UP	SOTIRIOU_BREAST_CANCER_GRADE_1_VS_3_UP	153	0.408841	1.46011	0.00290316	0.0348993	0.0285829	8904	tags=45%, list=25%, signal=34%	55165/3925/7334/993/55969/4001/4175/4830/4172/23560/6636/11130/2237/5688/29088/552900/552900/22948/1058/10471/10471/10471/10471/10471/10471/10471/10471/10471/10471/54069/79075/10212/3015/84790/9319/2146/3149/10471/10471/10471/10471/10471/10376/51155/8914/3838/23590/9868/6637/9582/7295/6182/10204/26271/10963/9833/9837/4085/79581/79581/3832/23234/6631/4605/1017/11339/5347/891/56941/6472/9088/699/11…
MALONEY_RESPONSE_TO_17AAG_DN	MALONEY_RESPONSE_TO_17AAG_DN	77	0.496233	1.59316	0.00292239	0.0350631	0.0287171	7572	tags=51%, list=21%, signal=40%	7114/4090/2760/3939/3939/10549/6635/2790/4670/5825/6850/5757/2958/7520/6628/1211/6741/3608/6636/908/1212/5688/8520/10935/5686/3838/4190/6637/10923/4085/509/8443/10728/7531/7531/6059/6428/5347/7167/54205/8655
REACTOME_TRANSCRIPTION_OF_THE_HIV_GENOME	REACTOME_TRANSCRIPTION_OF_THE_HIV_GENOME	69	0.506706	1.60505	0.00294561	0.0352067	0.0288348	7921	tags=61%, list=22%, signal=47%	1022/1022/2968/2968/2968/2968/2968/2968/6924/54457/2068/5435/5436/2958/2965/2965/22916/11198/6829/5431/6749/9150/9150/8178/25920/6827/5434/4686/6877/2961/5433/2968/2968/2968/2968/2968/2968/2968/2968/2968/2968/2968/2968/5432/404672/7469/2968/2968/2968/2968/2968/2968/5437/6884/51497/8732/4331/7936/7936/7936/7936/7936/7936/7936/7936/7936/7936/7936/7936/7936/7936/7936/7936/7936/7936/7936/7936/7936/79…
SARRIO_EPITHELIAL_MESENCHYMAL_TRANSITION_UP	SARRIO_EPITHELIAL_MESENCHYMAL_TRANSITION_UP	163	0.411701	1.47801	0.00294348	0.0352067	0.0288348	6826	tags=51%, list=19%, signal=42%	203068/203068/203068/203068/203068/203068/203068/203068/2171/2023/55165/10095/23753/8099/4323/89958/1462/24147/3925/83879/81873/5230/8061/595/7371/51330/150726/4175/221150/100129361/100129361/100129361/100129361/100129361/100129361/4172/91283/11130/26147/203068/203068/203068/203068/203068/203068/203068/203068/203068/203068/203068/203068/203068/203068/203068/203068/203068/203068/203068/203068/2030…
BONOME_OVARIAN_CANCER_SURVIVAL_SUBOPTIMAL_DEBULKING	BONOME_OVARIAN_CANCER_SURVIVAL_SUBOPTIMAL_DEBULKING	494	0.318922	1.27424	0.00296795	0.0354062	0.0289981	5292	tags=23%, list=15%, signal=20%	3487/9452/347902/284119/50619/1435/81553/51291/7409/11213/9454/4681/9641/2889/9638/23550/309/2149/64781/6688/9765/9138/55343/8835/9749/79084/285203/10919/10919/10919/10919/10919/10919/10919/57109/57109/9397/5530/11015/4145/23463/48/56652/7905/23683/64924/10919/10919/10919/10919/10919/10919/10919/10919/10919/10919/10919/10919/10919/10919/11196/54462/5573/6789/4277/4277/4277/4277/4277/4277/4277/427…
KAUFFMANN_DNA_REPAIR_GENES	KAUFFMANN_DNA_REPAIR_GENES	226	0.381022	1.42224	0.0029956	0.0356681	0.0292126	9386	tags=44%, list=26%, signal=33%	7155/1022/1022/2968/2968/2968/2968/2968/2968/7158/7015/7317/143/142/7374/8932/2068/1454/7334/11165/53615/1854/7332/7011/7013/221120/4913/7507/5889/7520/56897/55775/8208/2965/2965/11198/7341/7156/7156/121642/10856/252969/10036/2237/55120/6749/8626/2547/4255/10459/11200/91419/91419/91419/91419/5982/9937/4350/2956/4436/545/5887/2189/1069/11284/7518/2968/2968/2968/2968/2968/2968/2968/2968/2968/2968/2…
LEE_NEURAL_CREST_STEM_CELL_UP	LEE_NEURAL_CREST_STEM_CELL_UP	144	0.408054	1.45321	0.00300131	0.0356684	0.0292128	4193	tags=21%, list=12%, signal=19%	301/9516/6282/3490/1429/8905/3956/6281/396/8645/9118/55223/29099/10580/2004/8204/1113/1113/1052/10468/1917/6663/214/3212/3488/11075/6591/64215/5457/83442/4826/5376
AMIT_SERUM_RESPONSE_60_MCF10A	AMIT_SERUM_RESPONSE_60_MCF10A	58	-0.549301	-1.64863	0.00301895	0.03581	0.0293289	2172	tags=29%, list=6%, signal=28%	79901/1839/10150/4929/9935/2069/80149/5366/388/8660/22936/10957/3491/800/10769/7286/6446
MARKEY_RB1_ACUTE_LOF_DN	MARKEY_RB1_ACUTE_LOF_DN	226	0.380942	1.42194	0.00304594	0.0360619	0.0295351	6009	tags=40%, list=17%, signal=34%	4689/4689/3936/9535/1512/1043/7409/129607/5552/3059/837/8826/5777/30001/5698/5698/5698/5698/5698/5698/5698/5698/205/5788/5788/5788/5788/5214/5698/5698/5698/5698/5698/5698/5698/5698/5698/5698/5698/5698/5698/5698/5698/5698/1616/1616/1616/1616/1616/1616/2182/5698/5698/5698/5698/5698/5698/5698/5698/5698/5698/5698/5698/5698/5698/5698/5698/9636/307/3133/3133/3133/3133/3133/3133/3133/3133/3133/3133/3133…
MASSARWEH_TAMOXIFEN_RESISTANCE_DN	MASSARWEH_TAMOXIFEN_RESISTANCE_DN	240	0.372058	1.3907	0.00307974	0.0363933	0.0298065	3546	tags=19%, list=10%, signal=18%	3248/3487/29108/347902/6947/8900/2317/4665/8905/1836/309/25800/3241/54898/7903/120/150678/6659/9466/9466/143/79624/8936/4886/4602/2717/118980/223082/8204/8624/55672/90627/23254/4001/155400/22882/55686/91272/9886/596/84733/3920/84187/9467/252969/2289/3995/80336/10949/7138
REACTOME_SUMOYLATION_OF_DNA_DAMAGE_RESPONSE_AND_REPAIR_PROTEINS	REACTOME_SUMOYLATION_OF_DNA_DAMAGE_RESPONSE_AND_REPAIR_PROTEINS	76	0.500993	1.60397	0.00310085	0.0365737	0.0299543	6808	tags=40%, list=19%, signal=32%	9656/9656/9656/9656/9656/9656/9656/9656/5893/10274/8021/22955/286053/9656/9656/9656/9656/9656/9656/9656/9656/9656/9656/9656/9656/9656/9656/9656/9656/9656/9656/9656/9656/9656/9656/9656/9656/80012/9656/9656/9656/9656/9656/9656/9656/9656/7486/8924/8924/8924/10735/100101267/6015/6015/6015/6015/6015/6015/6015/6015/6015/6015/6015/6015/6015/6015/6015/6015/6015/6015
KEGG_NATURAL_KILLER_CELL_MEDIATED_CYTOTOXICITY	KEGG_NATURAL_KILLER_CELL_MEDIATED_CYTOTOXICITY	132	0.429428	1.5048	0.00313986	0.0369642	0.0302741	8621	tags=21%, list=24%, signal=17%	5579/7409/5777/5294/27040/3937/3133/3133/3133/3133/3133/3133/3133/3133/3133/3133/3133/3133/3133/3133/3133/3133/3133/3133/3133/3133/3133/3133/3133/3133/3133/3133/3133/3133/5530/10451/2885/3384/4277/4277/4277/4277/4277/4277/4277/4277/8797/3265/3265/3107/3107/3107/3107/3107/3107/3107/3460/3460/6850/4772/5604/7410/5880/3460/3460/5335/919/4775/3454/8795/3105/3105/3105/3105/3105/3105/3105/3105/5595/489…
REACTOME_CD209_DC_SIGN_SIGNALING	REACTOME_CD209_DC_SIGN_SIGNALING	21	0.699711	1.73062	0.00314651	0.0369729	0.0302813	2049	tags=35%, list=6%, signal=33%	4067/3385/4790/5062/3384/5567/3265/3265
PID_THROMBIN_PAR1_PATHWAY	PID_THROMBIN_PAR1_PATHWAY	43	0.577737	1.68461	0.00316571	0.0370063	0.0303087	3544	tags=43%, list=10%, signal=39%	5579/7791/7791/2769/2771/2149/157/54331/9138/396/5585/7408/2776/2782/2773/2767/5580/6642/7225
PELLICCIOTTA_HDAC_IN_ANTIGEN_PRESENTATION_UP	PELLICCIOTTA_HDAC_IN_ANTIGEN_PRESENTATION_UP	63	0.512988	1.60424	0.00315701	0.0370063	0.0303087	7126	tags=54%, list=20%, signal=44%	109/2923/9601/7184/51060/51280/567/567/10134/51371/54732/3309/5709/57222/58485/5710/10972/5689/5689/5695/56681/55829/57120/5686/55204/1315/81555/811/9276/54432/5704/5704/51399/51399/1314/11316/27095
DANG_REGULATED_BY_MYC_UP	DANG_REGULATED_BY_MYC_UP	68	0.503778	1.59213	0.00316708	0.0370063	0.0303087	7163	tags=49%, list=20%, signal=40%	9456/7416/6566/6566/7015/7372/6838/6838/9094/27309/6606/6606/6606/6606/6606/7371/8187/55775/6628/6426/6426/55759/10856/9637/7064/6723/10885/22928/9136/10907/7186/7345/7295/94081/6470/6470/10607/291/7531/7531/9343/7407/7407/7407/7407/7407/7407/7407/7407/7407/7407/7407/7407/7407/7407/6634/5054/7407/7407/7407/7407/7407/7407/7407/6777
BIOCARTA_MITOCHONDRIA_PATHWAY	BIOCARTA_MITOCHONDRIA_PATHWAY	19	0.707643	1.71409	0.00319686	0.0372154	0.0304799	6665	tags=79%, list=19%, signal=64%	840/1676/842/578/317/596/638/839/331/841/9131/2021/836/581/1677
EPPERT_PROGENITOR	EPPERT_PROGENITOR	137	0.420564	1.48445	0.00319364	0.0372154	0.0304799	5374	tags=35%, list=15%, signal=30%	6263/11001/56259/23043/1022/1022/23420/23420/56479/55706/7372/48/8936/22920/10236/10236/3945/80150/9653/54619/1854/25927/55915/4285/10767/3416/11198/1965/813/11130/54802/10128/7768/1021/3419/1737/10768/11200/5376/54962/7175/4686/9790/84295/9319/695/23517/9669/123/10606
HALLMARK_PI3K_AKT_MTOR_SIGNALING	HALLMARK_PI3K_AKT_MTOR_SIGNALING	104	0.461392	1.56493	0.00321911	0.037405	0.0306351	7610	tags=50%, list=21%, signal=40%	5579/3709/5216/3561/5899/7132/7184/1072/7529/5576/396/10097/10451/207/7334/4793/4793/2885/3265/3265/10094/79109/5335/156/117145/6197/5499/1460/1460/1460/1460/1460/1460/1460/3565/7852/51719/6773/51295/6885/10096/1460/1460/1460/1460/1460/1460/1460/6195/6195/8737/7186/1460/1460/1460/1460/1460/1460/1460/81617/811/5601/5879/466/4087/5594/29110/1017/51135/5300/4690/3932/1460/1460/1460/1460/1460/1460/14…
REACTOME_SMOOTH_MUSCLE_CONTRACTION	REACTOME_SMOOTH_MUSCLE_CONTRACTION	38	0.598899	1.71164	0.00326305	0.0377056	0.0308814	3200	tags=36%, list=9%, signal=33%	301/7171/309/7414/10627/3693/801/7170/5062/10580/93408/5829/140465/302
YAGI_AML_SURVIVAL	YAGI_AML_SURVIVAL	119	0.429339	1.48164	0.00325837	0.0377056	0.0308814	6079	tags=36%, list=17%, signal=30%	7791/7791/1429/9454/84679/23151/138151/23258/7464/7798/7416/3157/586/7321/22876/51347/8726/7408/10778/10493/9128/7371/1890/10513/10981/3033/4830/65979/8260/1053/410/1021/3796/3184/81611/334/3336/2827/56623/7186/9582/5915/58495/5190/1388/1388/1388/1388/291/5437
SENESE_HDAC3_TARGETS_UP	SENESE_HDAC3_TARGETS_UP	481	0.321401	1.283	0.00325726	0.0377056	0.0308814	4022	tags=16%, list=11%, signal=14%	130271/257397/950/4179/3423/11272/11272/11272/6541/1809/3097/7994/1390/84335/79712/79054/54538/330/27161/2643/26036/4982/9645/100134259/6004/84668/23049/55344/132864/57707/4053/89795/6560/54206/10150/55870/4929/793/439921/26118/51274/571/4792/65009/10211/10211/10211/10211/10211/10211/10211/10211/25897/115548/79937/54800/5366/388/11245/153222/23657/1942/144455/3572/467/10211/10211/10211/10211/1021…
ABE_INNER_EAR	ABE_INNER_EAR	43	-0.583636	-1.65451	0.0032885	0.0379298	0.031065	6991	tags=49%, list=19%, signal=39%	23632/6193/3671/3671/6161/4256/477/6205/10083/5947/58473/6158/65268/10791/8190/7404/81888/1428/4035/1191/1299/9973
WP_ALZHEIMERS_DISEASE_AND_MIRNA_EFFECTS	WP_ALZHEIMERS_DISEASE_AND_MIRNA_EFFECTS	265	0.365836	1.38097	0.00330535	0.038054	0.0311667	5769	tags=32%, list=16%, signal=28%	1435/3709/6263/203068/203068/203068/203068/203068/203068/203068/203068/7132/8323/83464/2903/7416/840/60673/5530/207/51107/801/4790/2776/1454/3028/2597/8772/348/3265/3265/5690/842/55851/3708/5664/84833/5684/8678/5604/5481/317/81671/3416/10297/1965/5663/8883/5709/10000/10000/5685/5610/9451/81029/5710/5289/351/1460/1460/1460/1460/1460/1460/1460/5688/90550/203068/203068/203068/203068/203068/203068/20…
NEBEN_AML_WITH_FLT3_OR_NRAS_UP	NEBEN_AML_WITH_FLT3_OR_NRAS_UP	8	-0.869351	-1.68413	0.00332087	0.0381626	0.0312556	2163	tags=38%, list=6%, signal=35%	23049/3955/3040
KIM_RESPONSE_TO_TSA_AND_DECITABINE_UP	KIM_RESPONSE_TO_TSA_AND_DECITABINE_UP	131	-0.444339	-1.50087	0.00333625	0.0382691	0.0313429	3041	tags=34%, list=8%, signal=31%	55512/5176/5176/10974/360/8347/9022/4741/3914/3880/10140/1591/4815/3429/3429/5641/6535/26136/6274/2810/1474/1577/55785/3872/54509/5274/3665/3665/3373/25893/4189/7108/2166/2644/2281/11145/8630/1191/467/3669/3855/1366/1366/9518/1026/113177/3306
REACTOME_SUMOYLATION	REACTOME_SUMOYLATION	178	0.394637	1.42463	0.00334801	0.0383338	0.0313959	6529	tags=32%, list=18%, signal=27%	6015/6015/6015/6015/6015/6015/9641/7155/1616/1616/1616/1616/1616/1616/121504/1789/7158/8365/55706/142/5987/5987/5987/5987/5987/5987/5987/1029/4869/8204/10055/57332/9189/51564/84733/3183/7341/3066/11315/23636/3065/9883/7421/1616/1616/1616/1616/1616/1616/1616/1616/1616/1616/1616/1616/9112/6672/6304/165918/7175/1616/1616/1616/1616/1616/1616/9631/23279/1487/1107/23137/51602/10762/5903/57591/1069/4791…
ALFANO_MYC_TARGETS	ALFANO_MYC_TARGETS	236	0.370095	1.38063	0.0033574	0.0383712	0.0314265	5374	tags=30%, list=15%, signal=26%	301/4061/4061/8900/10092/4681/1875/79754/5019/205/6281/109/5339/2771/5328/1465/4131/25800/6566/6566/7205/6949/120/6941/6941/6941/6941/6941/6941/6941/642/7414/10627/166/3693/10452/22984/6632/9797/9741/3925/7284/9590/8624/10007/5834/7371/23171/54838/3305/3305/3305/3305/3305/9188/5829/23170/4861/5537/1104/10969/3305/3305/3305/3305/3305/23481/10954/6678/3614/4809/23173/1717/6941/6941/6941/6941/6941/6…
REACTOME_REGULATION_OF_HMOX1_EXPRESSION_AND_ACTIVITY	REACTOME_REGULATION_OF_HMOX1_EXPRESSION_AND_ACTIVITY	64	0.517286	1.62389	0.00337177	0.0384017	0.0314515	5470	tags=62%, list=15%, signal=53%	5698/5698/5698/5698/5698/5698/5698/5698/5698/5698/5698/5698/5698/5698/5698/5698/5698/5698/5698/5698/5698/5698/5698/5698/5698/5698/5698/5698/5698/5698/5698/5698/5698/5698/5698/5698/5698/5698/5698/5698/5696/5696/5696/5696/5696/5696/5696/5696/8454/5696/5696/5696/5696/5696/5696/5696/5696/5696/5696/5696/5696/5696/5696/5696/5696/5696/5696/5696/5696/5696/5696/5696/5696/5696/5696/5696/5696/5696/5696/5696…
TARTE_PLASMA_CELL_VS_B_LYMPHOCYTE_UP	TARTE_PLASMA_CELL_VS_B_LYMPHOCYTE_UP	80	0.460908	1.49079	0.00337233	0.0384017	0.0314515	5896	tags=32%, list=16%, signal=27%	952/2621/4758/4758/4758/4758/4758/4758/4758/4758/3601/360/5831/939/6541/16/7923/7923/7923/7923/7923/7923/7923/7923/7923/7923/7923/7923/7923/7923/7923/7923/7923/7923/7923/7923/7923/7923/7923/7923/7923/7923/7923/7923/7923/7923/7923/7923/7923/7923/7923/7923/1820/5163/5274/10970/3029/22936
TIEN_INTESTINE_PROBIOTICS_6HR_DN	TIEN_INTESTINE_PROBIOTICS_6HR_DN	169	0.402091	1.45018	0.00340073	0.0386547	0.0316587	7887	tags=44%, list=22%, signal=35%	87/6809/10788/56950/9057/1627/5361/309/376267/25898/79874/7004/9683/5937/259230/51232/51232/23543/23543/54537/7321/23429/23429/22876/55726/80014/64747/9616/5525/1052/3074/9846/9646/51303/55893/55313/100129361/100129361/100129361/100129361/100129361/100129361/23348/63931/9367/123803/123803/8226/7265/10128/27032/57136/26073/4704/1058/80196/81611/64778/6925/54470/4552/4338/58533/6728/51593/158/9833/…
CHARAFE_BREAST_CANCER_BASAL_VS_MESENCHYMAL_UP	CHARAFE_BREAST_CANCER_BASAL_VS_MESENCHYMAL_UP	120	-0.450855	-1.5037	0.00342688	0.0388814	0.0318444	4558	tags=18%, list=13%, signal=16%	116238/64762/3985/5017/4891/999/5652/196996/57018/100133941/5349/6337/143098/954/80194/54836/64097/55040/11187/3934/50848/29911/79767/3775/1999/93099/80004/2180/57402/1159/7538/1831/2354/10158
REACTOME_EXTENSION_OF_TELOMERES	REACTOME_EXTENSION_OF_TELOMERES	51	0.54052	1.64377	0.00343877	0.0389457	0.031897	9264	tags=67%, list=26%, signal=50%	8900/23243/7015/7013/10856/5537/2237/54921/55651/54433/79075/5982/8607/8607/55505/5425/65057/6118/55164/1017/51750/55135/23649/23649/6117/5111/5422/5983/5984/5424/641/80169/10714/26277/26277/5558
XIE_ST_HSC_S1PR3_OE_DN	XIE_ST_HSC_S1PR3_OE_DN	23	-0.692726	-1.69904	0.00347639	0.0393007	0.0321878	4930	tags=65%, list=14%, signal=56%	5409/7036/5362/51252/4774/119/759/51327/2264/9435/2996/23762/2994/2993/3047/3048/8991
WP_B_CELL_RECEPTOR_SIGNALING_PATHWAY	WP_B_CELL_RECEPTOR_SIGNALING_PATHWAY	97	0.459883	1.54057	0.00348551	0.0393329	0.0322141	6633	tags=43%, list=18%, signal=35%	5579/7409/3059/4067/5777/5294/5788/5788/2889/5788/5788/4149/975/207/4790/1871/10892/2885/26469/3265/3265/6850/9846/5604/5580/7410/5880/5335/4775/3608/867/23396/8915/6885/6195/6195/695/2969/5295/5336/5601/998/2002/5879/1380/5594
MIZUKAMI_HYPOXIA_UP	MIZUKAMI_HYPOXIA_UP	12	-0.799491	-1.69071	0.00351234	0.0394226	0.0322876	2102	tags=33%, list=6%, signal=31%	7422/133/1942/5154
PUIFFE_INVASION_INHIBITED_BY_ASCITES_UP	PUIFFE_INVASION_INHIBITED_BY_ASCITES_UP	77	0.489662	1.57206	0.00350239	0.0394226	0.0322876	6854	tags=34%, list=19%, signal=28%	3487/4067/2023/5339/9180/2114/801/10226/3837/2280/5230/4277/4277/4277/4277/4277/4277/4277/4277/1108/51192/5867/4172/6627/55379/56061/9812/7326/23484/63916/2618/2618/1058/2618/2618/1981/5725/3149/1244/3838/54928/10963/283459/10576/5578/2539/55113/10518/22985
HELLER_HDAC_TARGETS_UP	HELLER_HDAC_TARGETS_UP	303	-0.375853	-1.37558	0.00350951	0.0394226	0.0322876	5902	tags=19%, list=16%, signal=16%	57728/4902/5217/1062/9787/2896/4758/4758/4758/4758/4758/4758/4758/4758/8644/26137/5467/5883/10233/2934/3728/8913/2537/23208/4494/5447/10499/6490/55740/2512/1543/991/57030/2273/2626/2626/4900/2232/3897/8938/55766/4439/4439/4439/4439/4439/4439/4439/4439/23099/115/10162/18/7280/330/5630/79095/4439/4439/4439/4439/4439/4439/4439/4439/1785/6535/4439/4439/4439/4439/4439/4439/4439/4439/55876/8969/8349/19…
SENGUPTA_NASOPHARYNGEAL_CARCINOMA_WITH_LMP1_DN	SENGUPTA_NASOPHARYNGEAL_CARCINOMA_WITH_LMP1_DN	168	-0.417407	-1.44956	0.00352577	0.0395025	0.032353	9867	tags=46%, list=28%, signal=33%	3861/629/629/629/629/629/629/629/629/629/629/629/629/629/629/4103/6707/6279/643733/157506/55283/388115/1382/339512/2001/9635/636/128602/1776/115352/729522/4102/80298/12/10630/3854/83657/153579/6540/9687/3851/153643/9848/341640/284217/25984/25984/25984/25984/9615/222389/56256/56256/5166/143884/8115/2938/118491/284340/7049/5265/5265/2568/8076/290/646962/55117/56241/5554/5554/5554/5554/5554/11272/11…
REACTOME_SUMOYLATION_OF_CHROMATIN_ORGANIZATION_PROTEINS	REACTOME_SUMOYLATION_OF_CHROMATIN_ORGANIZATION_PROTEINS	62	0.527214	1.64249	0.00355869	0.0395179	0.0323656	692	tags=19%, list=2%, signal=18%	6015/6015/6015/6015/6015/6015/6015/6015/6015/6015/6015/6015/6015/6015/6015/6015/6015/6015
GROSS_HYPOXIA_VIA_HIF1A_UP	GROSS_HYPOXIA_VIA_HIF1A_UP	77	0.488619	1.56872	0.00354701	0.0395179	0.0323656	6359	tags=38%, list=18%, signal=31%	1435/7919/7919/7919/7919/7919/7919/7919/7919/5361/2149/7919/7919/7919/7919/7919/7919/7919/7919/11165/3265/3265/8216/55920/55920/5481/9188/6426/6426/64854/6723/7203/2618/2618/55720/113178/4839/27101/2618/2618/7841/51602/11282/11282/10528/3838/6573/6737/10146/55364/8697/51495/51703/23082/5693/4714/10270
REACTOME_TNFR2_NON_CANONICAL_NF_KB_PATHWAY	REACTOME_TNFR2_NON_CANONICAL_NF_KB_PATHWAY	99	0.449343	1.50909	0.00355717	0.0395179	0.0323656	5304	tags=34%, list=15%, signal=29%	5698/5698/5698/5698/5698/5698/5698/5698/5698/5698/5698/5698/5698/5698/5698/5698/7132/5698/5698/5698/5698/5698/5698/5698/5698/4055/5698/5698/5698/5698/5698/5698/5698/5698/5698/5698/5698/5698/5698/5698/5698/5698/943/5696/5696/5696/5696/5696/5696/5696/5696/8454/5696/5696/5696/5696/5696/5696/5696/5696/5696/5696/5696/5696/5696/5696/5696/5696/5696/5696/5696/5696/5696/5696/5696/5696/5696/5696/5696/5696/…
SENESE_HDAC1_AND_HDAC2_TARGETS_DN	SENESE_HDAC1_AND_HDAC2_TARGETS_DN	221	-0.394447	-1.40306	0.00355657	0.0395179	0.0323656	8284	tags=41%, list=23%, signal=32%	51316/240/240/4015/3887/8334/55227/119391/493869/80173/6696/51435/219790/157869/5137/3866/285368/100506658/100506658/4781/2222/2222/3422/2260/114990/114990/1907/4211/7846/1879/7168/7290/146664/65084/55076/10398/8076/57535/149603/149603/3983/57338/7474/4330/5118/55346/55635/1307/653145/6382/64759/23635/283373/57452/26471/1837/4091/340719/2817/9547/4054/84056/23052/3872/4047/4047/7134/4638/11167/27…
ACEVEDO_NORMAL_TISSUE_ADJACENT_TO_LIVER_TUMOR_DN	ACEVEDO_NORMAL_TISSUE_ADJACENT_TO_LIVER_TUMOR_DN	352	0.342273	1.32717	0.00353909	0.0395179	0.0323656	6642	tags=36%, list=19%, signal=29%	3487/8912/71/155066/9647/3385/7132/57645/10555/130589/4055/79180/1729/220323/54958/64949/1445/7873/79814/6051/8536/171546/6709/11164/3157/400916/400916/26227/79751/51107/51465/4790/80777/55748/253782/11165/4116/23478/79720/27309/84316/55277/5435/2806/79155/29101/55276/51726/2746/29093/51635/10468/5684/27436/5090/26135/39/9189/54471/54471/3033/7410/54442/5868/23528/54602/3309/79803/56005/58477/726…
CHIANG_LIVER_CANCER_SUBCLASS_POLYSOMY7_UP	CHIANG_LIVER_CANCER_SUBCLASS_POLYSOMY7_UP	77	-0.505679	-1.58154	0.00361551	0.040007	0.0327662	6881	tags=45%, list=19%, signal=36%	283600/6580/5244/399694/1365/758/25913/5753/404037/252995/5447/2217/94121/3914/55107/3483/5652/51175/135932/222256/1548/1409/2642/2642/401393/2346/84253/24146/23562/1549/122622/1124/1124/7089/79094/27141/27141
WU_CELL_MIGRATION	WU_CELL_MIGRATION	183	0.385535	1.40454	0.00361259	0.040007	0.0327662	3407	tags=20%, list=9%, signal=18%	7431/397/10874/822/1512/79623/4478/2034/3490/5552/11001/2171/4232/2752/2589/1612/4131/56034/7078/5325/1462/558/9590/8061/6286/6275/1917/64167/51303/8091/5880/8942/684/64065/6277/1001/6591
JAEGER_METASTASIS_DN	JAEGER_METASTASIS_DN	255	-0.387363	-1.40226	0.00365816	0.0404075	0.0330942	5254	tags=29%, list=15%, signal=25%	3728/5650/3848/3983/360/25833/7474/3853/1040/1832/9022/771/3914/374/10529/5803/5549/3909/653145/3880/6382/2196/79755/50649/999/222/5652/3710/108/6278/2810/100133941/1474/5349/9547/6337/55765/3872/3963/3963/3963/3963/1294/1606/5655/11187/4147/56924/11202/4486/4057/1288/79767/55620/4118/688/5727/80004/9314/5742/7277/57402/1124/1124/3963/3963/3963/3963/27076/10628/3613/694/7001/1159/7286/667/6095/65…
KEGG_CHEMOKINE_SIGNALING_PATHWAY	KEGG_CHEMOKINE_SIGNALING_PATHWAY	178	0.393044	1.41888	0.00370043	0.0408024	0.0334177	4772	tags=26%, list=13%, signal=22%	1794/5579/3576/7409/57580/4067/5294/109/2771/9564/9564/157/1445/2829/54331/9844/10451/207/4790/2790/4793/4793/2885/5567/2782/2773/5908/3265/3265/5604/5580/7410/5829/6774/5880/156/10000/10000/1236/5595/4893/7852/6773/113/7454/1233/2833/387
NABA_CORE_MATRISOME	NABA_CORE_MATRISOME	273	-0.387604	-1.40492	0.00371505	0.0408917	0.0334908	7737	tags=46%, list=22%, signal=36%	633/6696/7148/7148/7148/7148/7148/7148/7148/7148/340990/157869/30008/2006/284217/146177/3910/2199/342035/5212/4917/133584/7450/1292/168667/10516/60484/50859/91522/4256/60506/7148/7148/7148/7148/7148/7148/7148/7148/1101/255743/2202/2621/404037/7148/7148/7148/7148/7148/7148/7148/7148/4148/1293/90113/116844/8076/8292/2331/5118/8840/127435/7058/84467/80737/80737/80737/80737/80737/80737/80737/80737/80…
FRASOR_RESPONSE_TO_ESTRADIOL_DN	FRASOR_RESPONSE_TO_ESTRADIOL_DN	75	-0.51907	-1.61932	0.0037286	0.0409305	0.0335226	3088	tags=49%, list=9%, signal=45%	8870/8870/8870/8870/8870/8870/100133941/3912/2065/140462/6609/27124/2346/4147/54541/10057/9915/4753/2057/6623/1191/1942/23531/3913/3855/8870/8870/8870/8870/8870/8870/8870/8870/8870/8870/8870/8870/8870/8870/8870/8870/8870/8870/8870/8870/8870/8870/8870/8870/10769/10397/1843/5909/8991
RICKMAN_TUMOR_DIFFERENTIATED_WELL_VS_POORLY_UP	RICKMAN_TUMOR_DIFFERENTIATED_WELL_VS_POORLY_UP	239	0.370067	1.38417	0.00373165	0.0409305	0.0335226	7803	tags=34%, list=22%, signal=27%	10385/7188/149951/149951/216/155066/1875/217/60509/84303/92906/60436/4602/142/118980/6635/25909/80342/10253/22929/57727/7371/7013/55268/9557/84629/27436/4756/55699/378708/25871/3192/90987/90987/22916/79692/4172/6426/6426/64395/498/1876/5431/80063/8776/8125/7203/57176/57176/57176/57176/57176/57176/2971/27032/92312/129080/84838/10574/65988/54968/9968/2119/2956/27101/6421/56910/79140/4040/4040/6431/…
KEGG_VIBRIO_CHOLERAE_INFECTION	KEGG_VIBRIO_CHOLERAE_INFECTION	54	0.524936	1.59921	0.00377701	0.0413556	0.0338708	3761	tags=15%, list=10%, signal=13%	5579/71/30001/155066/109/60/9601/537/11015/5567/10952/90423/5335/245973/6558/8992
LI_WILMS_TUMOR_VS_FETAL_KIDNEY_1_UP	LI_WILMS_TUMOR_VS_FETAL_KIDNEY_1_UP	183	0.383992	1.39892	0.00380655	0.0416063	0.0340761	2827	tags=22%, list=8%, signal=20%	79026/1512/10788/8611/3490/8826/216/4067/288/1429/7048/5019/8659/6281/55937/55937/55937/55937/55937/55937/55937/23303/5328/307/9466/9466/3588/51232/51232/10447/1997/2114/7905/23598/558/10040/8202/348/23254/5525/51704/1052/2078/7436/9697/5151/214/3920/10965/3434/5191/6342
REACTOME_SPHINGOLIPID_DE_NOVO_BIOSYNTHESIS	REACTOME_SPHINGOLIPID_DE_NOVO_BIOSYNTHESIS	45	0.557816	1.64148	0.00383706	0.0418668	0.0342894	7619	tags=54%, list=21%, signal=43%	8611/8879/171546/259230/56848/23683/10087/253782/81537/81537/79603/9218/142891/224/5007/1455/10715/94101/124976/8560/25865/94103/166929/204219/91012
DELACROIX_RARG_BOUND_MEF	DELACROIX_RARG_BOUND_MEF	363	-0.366549	-1.36106	0.0038523	0.0419599	0.0343657	5663	tags=31%, list=16%, signal=26%	6048/6048/6048/6048/6048/6048/6048/6048/6048/6048/6048/6048/6048/6048/6048/6048/6048/6048/6048/6048/6048/6048/6048/6048/6048/6048/6048/6048/6048/6048/6048/6048/6048/6048/6048/4148/8817/7480/6048/6048/6048/6048/6048/6048/6048/5307/83641/169355/5607/100527943/83547/83547/84266/6498/2512/6487/5118/259173/771/58473/55367/5296/11162/1759/8694/8694/55196/9885/1152/653677/55593/1809/5989/5989/57152/3006…
REACTOME_SUMOYLATION_OF_DNA_REPLICATION_PROTEINS	REACTOME_SUMOYLATION_OF_DNA_REPLICATION_PROTEINS	46	0.551507	1.63578	0.00387815	0.0421682	0.0345362	9624	tags=63%, list=27%, signal=46%	7155/55706/7341/23636/9883/7175/9631/23279/10762/5903/8480/23165/9972/7329/51588/55746/3619/79023/6396/6613/5111/10401/5905/57122/79902/9688/4928/9212/53371
PID_SYNDECAN_3_PATHWAY	PID_SYNDECAN_3_PATHWAY	17	0.739751	1.75618	0.003926	0.0426145	0.0349018	2977	tags=39%, list=8%, signal=36%	9672/3576/8573/83464/51107/55851/5663
SASAKI_ADULT_T_CELL_LEUKEMIA	SASAKI_ADULT_T_CELL_LEUKEMIA	163	0.405468	1.45563	0.00394856	0.0427112	0.034981	7678	tags=56%, list=21%, signal=44%	27306/203068/203068/203068/203068/203068/203068/203068/203068/1718/28951/10473/10095/309/8323/5479/2135/9636/23420/23420/1265/10549/23463/4602/142/51097/6595/5690/961/518/5481/11151/4830/4172/1176/498/51103/11130/140465/302/3065/27032/5499/7024/1741/6183/6183/203068/203068/203068/203068/203068/203068/203068/203068/203068/203068/203068/203068/203068/203068/203068/203068/203068/203068/203068/203068…
WP_DNA_REPAIR_PATHWAYS_FULL_NETWORK	WP_DNA_REPAIR_PATHWAYS_FULL_NETWORK	120	0.417514	1.44639	0.00394855	0.0427112	0.034981	10286	tags=65%, list=29%, signal=46%	1022/1022/2968/2968/2968/2968/2968/2968/142/7374/2068/4913/378708/7507/5889/7520/2965/2965/7398/252969/2237/80233/55120/2547/91442/4255/728340/728340/728340/728340/5982/4350/2956/4436/545/5887/2189/79728/1069/11284/7518/2968/2968/2968/2968/2968/2968/2968/2968/2968/2968/2968/2968/5425/404672/56655/2968/2968/2968/2968/2968/2968/6118/672/5591/4331/6996/1642/54107/2073/6117/23583/5111/2071/201254/111…
WINTER_HYPOXIA_DN	WINTER_HYPOXIA_DN	49	0.556202	1.67881	0.00397309	0.0428866	0.0351247	3492	tags=18%, list=10%, signal=16%	9452/1794/10659/5788/5788/5788/5788/55843/4033/3071/23526/3384/596/2124/9459/3603
BROWNE_HCMV_INFECTION_24HR_UP	BROWNE_HCMV_INFECTION_24HR_UP	144	0.402796	1.43448	0.00397847	0.0428866	0.0351247	6476	tags=43%, list=18%, signal=35%	51083/3576/1875/205/9601/9308/9683/10675/5341/642/60436/79073/10452/5062/1871/6697/5496/2280/7013/64689/22859/22859/22882/9920/9920/5878/1917/4756/26146/1138/6628/6627/5709/10102/6837/6837/818/1212/9150/9150/27097/4200/2119/84901/5534/178/988/1209/8161/85453/10497/7469/291/7748/1525/10483/25855/9817/3383/1119/4072/22823/9143
PID_IL8_CXCR2_PATHWAY	PID_IL8_CXCR2_PATHWAY	33	0.616676	1.71185	0.00399033	0.0429406	0.0351689	3659	tags=55%, list=10%, signal=49%	1794/5579/3576/4067/2769/5294/2771/54331/9844/207/7408/2782/7879/5868/5880/867/8766/5515
REACTOME_CYCLIN_A_CDK2_ASSOCIATED_EVENTS_AT_S_PHASE_ENTRY	REACTOME_CYCLIN_A_CDK2_ASSOCIATED_EVENTS_AT_S_PHASE_ENTRY	84	0.479751	1.56372	0.00401832	0.0431677	0.0353549	4991	tags=62%, list=14%, signal=54%	8900/1875/5698/5698/5698/5698/5698/5698/5698/5698/5698/5698/5698/5698/5698/5698/5698/5698/5698/5698/5698/5698/5698/5698/5698/5698/4149/5698/5698/5698/5698/5698/5698/5698/5698/5698/5698/5698/5698/5698/5698/5698/5698/1022/1022/5696/5696/5696/5696/5696/5696/5696/5696/207/8454/5696/5696/5696/5696/5696/5696/5696/5696/5696/5696/5696/5696/5696/5696/5696/5696/5696/5696/5696/5696/5696/5696/5696/5696/5696/…
SWEET_LUNG_CANCER_KRAS_DN	SWEET_LUNG_CANCER_KRAS_DN	420	-0.356009	-1.333	0.00402792	0.0431967	0.0353786	6500	tags=41%, list=18%, signal=34%	6477/1066/1066/4855/4855/4855/4855/4855/4855/4855/7148/7148/7148/7148/7148/7148/7148/7148/23462/3851/7356/4855/4855/4855/4855/4855/4855/4855/63924/4781/28232/105375355/105375355/4254/4211/3202/7450/4855/4855/4855/4855/4855/4855/4855/6332/1292/761/1066/1066/7846/9060/4208/58498/9588/4256/7148/7148/7148/7148/7148/7148/7148/7148/57835/4855/4855/4855/4855/4855/4855/4855/477/255743/23452/1580/3977/116…
BIOCARTA_TEL_PATHWAY	BIOCARTA_TEL_PATHWAY	17	0.737357	1.7505	0.00408422	0.0437256	0.0358118	3659	tags=44%, list=10%, signal=40%	7015/207/7011/7013/7520/596/2547/5515
WP_OXIDATION_BY_CYTOCHROME_P450	WP_OXIDATION_BY_CYTOCHROME_P450	61	-0.536573	-1.61555	0.00409711	0.0437888	0.0358635	5771	tags=32%, list=16%, signal=26%	1580/1576/284541/126410/66002/5447/1555/1583/1583/1543/4051/1559/1591/54905/1577/1548/1528/1579/51706/1572/1549/1571/1586
REACTOME_BLOOD_GROUP_SYSTEMS_BIOSYNTHESIS	REACTOME_BLOOD_GROUP_SYSTEMS_BIOSYNTHESIS	21	-0.704927	-1.70444	0.00411133	0.0438658	0.0359266	7413	tags=70%, list=21%, signal=55%	8705/8705/8705/8705/8705/8705/8705/8705/8705/8705/8705/8705/8705/8705/8705/2525/6484/6487/8705/8705/8705/8705/8705/8707/2527/2524/30815/30815/10402/2523/6007/6006
WP_EFFECT_OF_PROGERIN_ON_GENES_INVOLVED_IN_HUTCHINSONGILFORD_PROGERIA_SYNDROME	WP_EFFECT_OF_PROGERIN_ON_GENES_INVOLVED_IN_HUTCHINSONGILFORD_PROGERIA_SYNDROME	29	0.638859	1.71345	0.00413782	0.0440734	0.0360967	4879	tags=55%, list=14%, signal=48%	8932/10951/23028/53615/57504/1108/51176/3066/3065/6839/11335/9112/1107/3021/5931/9219
HALLMARK_IL2_STAT5_SIGNALING	HALLMARK_IL2_STAT5_SIGNALING	198	0.374751	1.37795	0.00415843	0.0442178	0.0362149	5506	tags=32%, list=15%, signal=27%	4643/26018/64116/598/960/6484/10124/23208/3560/115361/1437/3563/177/177/177/177/177/177/177/177/177/177/177/177/177/177/6510/7133/3394/4050/4050/4050/4050/4050/4050/4050/4050/1326/5745/8651/177/177/177/177/177/177/177/254013/64375/177/177/177/177/177/177/177/6004/177/177/177/177/177/177/177/177/177/177/177/177/177/177/177/177/177/177/177/177/177/4860/1291/9910/1154/974/898/7293/2323/5179/10970/38…
DEN_INTERACT_WITH_LCA5	DEN_INTERACT_WITH_LCA5	26	0.67141	1.72604	0.00421481	0.0446605	0.0365775	6360	tags=42%, list=18%, signal=35%	1460/1460/1460/1460/1460/1460/1460/3304/3304/3304/3304/3304/3303/3303/3303/3303/3303/3305/3305/3305/3305/3305/3305/3305/3305/3305/3305/3303/3303/3303/3303/3303/3304/3304/3304/3304/3304/3304/3304/3304/3304/3304/3303/3303/3303/3303/3303/3304/3304/3304/3304/3304/3303/3303/3303/3303/3303/3304/3304/3304/3304/3304
DAVIES_MULTIPLE_MYELOMA_VS_MGUS_DN	DAVIES_MULTIPLE_MYELOMA_VS_MGUS_DN	25	0.658652	1.6865	0.00421838	0.0446605	0.0365775	1906	tags=31%, list=5%, signal=29%	9516/87/7114/2752/10487/7414/1796/392
AMIT_EGF_RESPONSE_20_HELA	AMIT_EGF_RESPONSE_20_HELA	12	-0.796687	-1.68478	0.00422147	0.0446605	0.0365775	6001	tags=77%, list=17%, signal=64%	9284/9284/6616/3725/80149/2353/23645/10628/4616/7832
REACTOME_INTERACTIONS_OF_REV_WITH_HOST_CELLULAR_PROTEINS	REACTOME_INTERACTIONS_OF_REV_WITH_HOST_CELLULAR_PROTEINS	37	0.598195	1.70321	0.00426035	0.0449646	0.0368265	8759	tags=65%, list=24%, signal=49%	55706/3837/4869/23636/1104/9883/5902/7175/9631/23279/10762/5903/8480/5901/23165/9972/7514/55746/79023/6396/5905/57122/79902/9688
ROSTY_CERVICAL_CANCER_PROLIFERATION_CLUSTER	ROSTY_CERVICAL_CANCER_PROLIFERATION_CLUSTER	139	0.404894	1.43409	0.00426456	0.0449646	0.0368265	8717	tags=37%, list=24%, signal=28%	9168/55013/55165/81539/1789/10072/1029/4001/51668/1829/10682/8208/124222/11130/2237/81831/54951/1058/79801/81611/3015/9319/2146/51155/25804/1841/3838/899/8836/54908/9582/26271/990/9833/26499/9837/4085/3832/672/4605/11339/5347/891/23649/23649/10051/5111/699/1111/1951/10460/29901/3070/22974/51512/4173/10166
RIGGI_EWING_SARCOMA_PROGENITOR_UP	RIGGI_EWING_SARCOMA_PROGENITOR_UP	426	0.326599	1.29128	0.00427761	0.0450263	0.0368771	3315	tags=19%, list=9%, signal=18%	22807/397/9452/389432/8519/9394/1512/8635/5579/7805/84456/2624/57580/28951/53346/7490/54733/1836/54360/84293/2149/50861/79180/1612/6770/3815/91607/10911/3133/3133/3133/3133/3133/3133/3133/3133/3133/3133/3133/3133/3133/3133/3133/3133/3133/3133/3133/3133/3133/3133/3133/3133/3133/3133/3133/3133/29126/56521/8365/26191/10675/2820/340061/340061/79899/719/9508/400916/400916/5817/7040/4886/84329/7552/651…
MULLIGHAN_NPM1_SIGNATURE_3_DN	MULLIGHAN_NPM1_SIGNATURE_3_DN	161	0.399694	1.42604	0.00431416	0.0453349	0.0371298	2442	tags=9%, list=7%, signal=8%	10385/4038/8519/55819/7048/4681/53827/2821/2821/23344/3939/3939/9647/2182/26037/1265/3241/6709/586/10200/6549/2776/47/7284/473/7332/5834/79161/56954/5867/51177/3692
BIOCARTA_TCR_PATHWAY	BIOCARTA_TCR_PATHWAY	44	0.568411	1.66628	0.00433438	0.045471	0.0372413	2895	tags=37%, list=8%, signal=34%	5579/7409/5294/27040/5778/4214/5530/801/4790/2885/3265/3265/4772/5604/5335/919/4775
WP_PYRIMIDINE_METABOLISM	WP_PYRIMIDINE_METABOLISM	83	0.48234	1.57237	0.00435256	0.0455854	0.037335	7663	tags=65%, list=21%, signal=51%	5169/129607/1635/79077/7372/221830/1854/654364/7371/1890/5436/171568/25885/4830/84172/29922/5431/83549/87178/55703/64425/51728/5434/10201/56474/9533/1841/5433/30834/30834/30834/30834/30834/30834/30834/30834/30834/30834/30834/30834/30834/30834/30834/30834/30834/30834/30834/30834/30834/30834/30834/30834/30834/30834/30834/30834/30834/30834/30834/30834/5425/5432/56655/4831/5437/661/6240/11128/10623/5…
HAEGERSTRAND_RESPONSE_TO_IMATINIB	HAEGERSTRAND_RESPONSE_TO_IMATINIB	9	-0.852959	-1.71832	0.00437505	0.0456527	0.0373901	4791	tags=67%, list=13%, signal=58%	8516/165/1306/5159/1385/1277
PID_HIV_NEF_PATHWAY	PID_HIV_NEF_PATHWAY	34	0.602023	1.68472	0.00436936	0.0456527	0.0373901	5520	tags=33%, list=15%, signal=28%	7132/1616/1616/1616/1616/1616/1616/840/4790/8772/1676/842/317/596/839/919/1616/1616/1616/1616/1616/1616/1616/1616/1616/1616/1616/1616/9530/841/1616/1616/1616/1616/1616/1616/835/836/8737/7186/8837
SENESE_HDAC2_TARGETS_DN	SENESE_HDAC2_TARGETS_DN	116	-0.460992	-1.53451	0.00438085	0.0456527	0.0373901	5496	tags=45%, list=15%, signal=38%	9369/8972/8972/51316/4015/3887/6696/51435/219790/5137/30008/100506658/100506658/4781/4633/1907/7168/10398/26137/8076/3728/23208/57338/7474/55635/64759/23635/1301/1837/340719/6919/9547/143098/3872/23321/4059/7134/219654/4147/388581/64718/81606/221/5570/4016/1009/6876/1277/3638/5727/1191/10232/55859/358
REACTOME_ABC_TRANSPORTER_DISORDERS	REACTOME_ABC_TRANSPORTER_DISORDERS	77	0.483781	1.55318	0.00439471	0.0457211	0.0374461	4991	tags=50%, list=14%, signal=43%	5698/5698/5698/5698/5698/5698/5698/5698/5698/5698/5698/5698/5698/5698/5698/5698/5698/5698/5698/5698/5698/5698/5698/5698/5698/5698/5698/5698/5698/5698/5698/5698/5698/5698/5698/5698/5698/5698/5698/5698/5696/5696/5696/5696/5696/5696/5696/5696/91445/55788/19/5696/5696/5696/5696/5696/5696/5696/5696/5696/5696/5696/5696/5696/5696/5696/5696/5696/5696/5696/5696/5696/5696/5696/5696/5696/5696/5696/5696/5696…
WP_PROGERIAASSOCIATED_LIPODYSTROPHY	WP_PROGERIAASSOCIATED_LIPODYSTROPHY	22	0.685151	1.71259	0.00446556	0.0463811	0.0379867	4117	tags=22%, list=11%, signal=19%	2200/10269/23463/7040/142/84823/4001/2339/4088/2865
HALMOS_CEBPA_TARGETS_DN	HALMOS_CEBPA_TARGETS_DN	44	-0.585862	-1.67256	0.00450947	0.0466053	0.0381703	7243	tags=57%, list=20%, signal=45%	7022/7204/10123/7369/11030/9411/4092/8412/7080/9032/10485/2886/10140/1364/4091/6337/7054/2065/388/10634/4118/1999/1647/3491/1831
REACTOME_SYNTHESIS_OF_LIPOXINS_LX	REACTOME_SYNTHESIS_OF_LIPOXINS_LX	6	0.916389	1.65188	0.00449715	0.0466053	0.0381703	1011	tags=38%, list=3%, signal=36%	3248/4056/4056
PID_PDGFRB_PATHWAY	PID_PDGFRB_PATHWAY	128	0.421473	1.47202	0.00450576	0.0466053	0.0381703	7333	tags=51%, list=20%, signal=41%	10092/8826/4067/5294/2889/7525/10095/9564/9564/10093/1445/10109/7529/396/6776/10097/1796/5770/2885/5908/3265/3265/10094/5867/5604/5580/7410/5868/6774/3685/5335/5610/6197/9351/7534/116985/867/5515/5595/4893/2909/8844/4301/5518/10096/387/10006/5295/9732/5601/10787/81/81/7532/2002/5879/5578/5594/7531/7531/10971/5321/2017/2017/5300/1398/6777/4690/3932
ZHENG_FOXP3_TARGETS_IN_THYMUS_UP	ZHENG_FOXP3_TARGETS_IN_THYMUS_UP	195	0.37575	1.37428	0.00453153	0.0467562	0.0382939	7019	tags=35%, list=20%, signal=28%	84456/9840/10659/7155/23258/23329/9371/100528030/25939/55843/55486/8835/969/4214/120/259230/81552/79624/10447/1997/80317/1316/10892/8202/8832/22884/2004/23143/55619/29777/221035/10767/51439/7764/54941/10678/55972/246175/678/7852/57157/51762/9991/157769/122830/25998/25998/23137/4048/27244/10905/5295/3091/2665/79699/5527/7174/3455/3455/10671/7096/169200/10383/2098/5682/9972/51542/1017/84159/163351/…
RASHI_RESPONSE_TO_IONIZING_RADIATION_1	RASHI_RESPONSE_TO_IONIZING_RADIATION_1	39	-0.612043	-1.70031	0.00462133	0.0476042	0.0389884	3621	tags=61%, list=10%, signal=55%	151295/3725/8870/8870/8870/8870/8870/8870/1306/7535/7422/51503/54663/2353/467/154/1647/8870/8870/8870/8870/8870/8870/8870/8870/8870/8870/8870/8870/8870/8870/8870/8870/8870/8870/8870/8870/8870/8870/8870/8870/7538/6446/1843/6513
MEISSNER_NPC_HCP_WITH_H3K4ME3_AND_H3K27ME3	MEISSNER_NPC_HCP_WITH_H3K4ME3_AND_H3K27ME3	141	-0.435106	-1.47558	0.00463708	0.0476881	0.0390571	6642	tags=34%, list=19%, signal=28%	55531/220441/2250/540/90249/3110/26030/64405/11247/2918/1040/4741/26585/26585/26585/2571/84803/283358/2774/64377/55890/4091/84465/84465/65268/2643/84978/64478/869/57540/388531/2065/10644/10076/84448/5360/55224/4880/153020/26289/1969/5324/85442/284656/7277/441478/90427/1026/10397/55220/384
OHGUCHI_LIVER_HNF4A_TARGETS_UP	OHGUCHI_LIVER_HNF4A_TARGETS_UP	50	-0.555943	-1.6157	0.00465347	0.0477782	0.0391309	2677	tags=36%, list=7%, signal=33%	780/780/780/780/780/780/780/376497/114571/312/5166/761/23676/2934/57535/1555/9194/2328/5890/948/55332/2944/3557/10628/145957/6517/6517/780/780/780/780/780/780/780/4616/3306
SHETH_LIVER_CANCER_VS_TXNIP_LOSS_PAM1	SHETH_LIVER_CANCER_VS_TXNIP_LOSS_PAM1	257	0.360318	1.36004	0.00468428	0.0479464	0.0392687	5343	tags=29%, list=15%, signal=25%	377/81618/4240/28951/23597/9641/55165/85012/644815/8682/7163/5328/83605/307/9600/56521/11099/10321/10919/10919/10919/10919/10919/10919/10919/382/6659/112858/5817/26227/359845/359845/10447/10226/7905/7408/1316/79575/1871/3925/10919/10919/10919/10919/10919/10919/10919/10919/10919/10919/10919/10919/10919/10919/25926/57504/7172/51390/51192/10468/1660/119559/54682/54682/3280/214/10919/10919/10919/1091…
LEE_RECENT_THYMIC_EMIGRANT	LEE_RECENT_THYMIC_EMIGRANT	229	0.364475	1.35401	0.00468517	0.0479464	0.0392687	6655	tags=31%, list=19%, signal=25%	3248/9452/54843/129607/4282/4282/5026/441168/23258/1612/51104/9636/8099/6659/5922/10434/10451/10447/84959/10778/7552/83879/10253/3276/5690/57600/55276/1829/1122/10743/54960/27339/286148/3066/147947/9034/10643/10128/867/10678/57176/57176/57176/57176/57176/57176/157697/157697/331/22903/901/1236/57337/148203/10471/10471/10471/10471/10471/10471/10471/10471/10471/10471/55536/57560/84901/9967/57563/898…
TONKS_TARGETS_OF_RUNX1_RUNX1T1_FUSION_GRANULOCYTE_UP	TONKS_TARGETS_OF_RUNX1_RUNX1T1_FUSION_GRANULOCYTE_UP	54	0.518752	1.58037	0.00469526	0.0479713	0.0392891	2351	tags=26%, list=7%, signal=25%	4744/4061/4061/216/23499/8303/7919/7919/7919/7919/7919/7919/7919/7919/2149/7919/7919/7919/7919/7919/7919/7919/7919/8835/2710/7015/6659/586/7915/7019/55172
KIM_LRRC3B_TARGETS	KIM_LRRC3B_TARGETS	30	0.640585	1.72797	0.00471284	0.0480725	0.039372	8436	tags=41%, list=24%, signal=32%	10581/2760/9636/3133/3133/3133/3133/3133/3133/3133/3133/3133/3133/3133/3133/3133/3133/3133/3133/3133/3133/3133/3133/3133/3133/3133/3133/3133/3133/3133/3133/6890/6890/6890/6890/6890/6890/6890/6890/567/567/3107/3107/3107/3107/3107/3107/3107/5721/5721/3434/3105/3105/3105/3105/3105/3105/3105/3105/6890/6890/6890/6890/6890/6890/6890/6890/6890/6890/6890/6890/6890/6890/6890/6890/3105/3105/3105/3105/3105/…
REACTOME_FORMATION_OF_THE_EARLY_ELONGATION_COMPLEX	REACTOME_FORMATION_OF_THE_EARLY_ELONGATION_COMPLEX	33	0.611107	1.69639	0.0047449	0.0483208	0.0395754	7921	tags=72%, list=22%, signal=56%	1022/1022/2968/2968/2968/2968/2968/2968/2068/5435/5436/2965/2965/22916/6829/5431/9150/9150/25920/6827/5434/4686/5433/2968/2968/2968/2968/2968/2968/2968/2968/2968/2968/2968/2968/5432/404672/7469/2968/2968/2968/2968/2968/2968/5437/51497/4331/7936/7936/7936/7936/7936/7936/7936/7936/7936/7936/7936/7936/7936/7936/7936/7936/7936/7936/7936/7936/7936/7936/7936/7936/7936/7936/7936/7936/7936/7936/2071
PURBEY_TARGETS_OF_CTBP1_AND_SATB1_DN	PURBEY_TARGETS_OF_CTBP1_AND_SATB1_DN	158	0.407644	1.46105	0.00478336	0.0486335	0.0398314	7240	tags=44%, list=20%, signal=35%	129607/9277/9277/9277/9277/9277/3561/6690/10269/9019/10654/147912/83985/84883/1029/9277/9277/9277/9277/9277/9277/9277/9277/9277/9277/8427/392/8570/10016/257144/257144/23466/3191/3191/2744/4717/5335/58477/55154/55704/9277/9277/9277/9277/9277/219/84844/439/9830/29990/65008/2630/113178/6827/9522/53347/2193/2972/9497/23265/9410/899/27258/65121/10291/84947/11215/283459/7965/84065/125950/2029/5134/1582…
REACTOME_METABOLISM_OF_POLYAMINES	REACTOME_METABOLISM_OF_POLYAMINES	58	0.516385	1.58443	0.00479757	0.0486989	0.039885	4991	tags=68%, list=14%, signal=59%	5698/5698/5698/5698/5698/5698/5698/5698/5698/5698/5698/5698/5698/5698/5698/5698/5698/5698/5698/5698/5698/5698/5698/5698/6611/5698/5698/5698/5698/5698/5698/5698/5698/5698/5698/5698/5698/5698/5698/5698/5698/79814/1728/5696/5696/5696/5696/5696/5696/5696/5696/5696/5696/5696/5696/5696/5696/5696/5696/5696/5696/5696/5696/5696/5696/5696/5696/5696/5696/5696/5696/5696/5696/5696/5696/5696/5696/5696/5696/569…
MAYBURD_RESPONSE_TO_L663536_DN	MAYBURD_RESPONSE_TO_L663536_DN	54	0.518086	1.57834	0.00487078	0.0493619	0.040428	8157	tags=46%, list=23%, signal=35%	55353/60/25800/55706/83440/1650/64924/401152/10197/9221/7430/29887/9125/3454/901/4436/51714/27131/27068/10971/54205/84899/199704/23089/1479/51622
MEISSNER_BRAIN_HCP_WITH_H3K4ME2	MEISSNER_BRAIN_HCP_WITH_H3K4ME2	18	-0.722779	-1.68112	0.00488565	0.0494326	0.0404859	8185	tags=79%, list=23%, signal=61%	10023/79000/10409/145873/91522/100527943/9379/51087/51087/347404/286/9229/729956/3291/374907
GRAHAM_CML_QUIESCENT_VS_NORMAL_DIVIDING_UP	GRAHAM_CML_QUIESCENT_VS_NORMAL_DIVIDING_UP	57	-0.536862	-1.60515	0.00491092	0.0496082	0.0406297	3780	tags=32%, list=11%, signal=29%	6934/6373/3725/3006/7280/4929/3386/51032/26512/54541/759/5366/3557/28984/23764/3043/4616/3047/3039
WP_PROTEOGLYCAN_BIOSYNTHESIS	WP_PROTEOGLYCAN_BIOSYNTHESIS	18	0.705939	1.68981	0.00495147	0.0496972	0.0407026	5288	tags=58%, list=15%, signal=49%	1836/113189/126792/2137/9469/347734/22856/11285/26229/2132/54928
MENSE_HYPOXIA_UP	MENSE_HYPOXIA_UP	98	-0.469947	-1.52213	0.00494432	0.0496972	0.0407026	2521	tags=25%, list=7%, signal=24%	10144/5163/230/7422/1051/154761/154761/8996/54800/8974/4601/23764/8780/3638/133/23081/22936/467/9314/23645/1647/51129/10058/1198/10397/6095
PLASARI_TGFB1_TARGETS_10HR_UP	PLASARI_TGFB1_TARGETS_10HR_UP	193	-0.395901	-1.39243	0.00494387	0.0496972	0.0407026	3457	tags=30%, list=10%, signal=27%	152519/10272/8482/8482/8870/8870/8870/8870/8870/8870/1004/2643/1240/3055/2810/9547/4982/83716/9645/23052/6004/7422/3726/1491/1839/861/2185/2069/51621/51621/3775/54438/5366/23764/65997/23645/441478/5155/56172/5154/8870/8870/8870/8870/8870/8870/8870/8870/8870/8870/8870/8870/8870/8870/8870/8870/8870/8870/8870/8870/8870/8870/8870/8870/4616/6615/55220/3306/6513/383
KIM_WT1_TARGETS_UP	KIM_WT1_TARGETS_UP	216	0.367006	1.36697	0.00492861	0.0496972	0.0407026	3223	tags=26%, list=9%, signal=24%	2355/81566/8870/8870/8870/8870/8870/8870/4864/2113/2810/2908/7057/3872/6935/3726/1839/23135/6461/27254/687/55615/4792/81606/2069/5606/481/677/3775/1969/9134/6385/7351/7262/7262/23764/7071/65981/3491/5154/800/8870/8870/8870/8870/8870/8870/8870/8870/8870/8870/8870/8870/8870/8870/8870/8870/8870/8870/8870/8870/8870/8870/8870/8870/6446/10458/7145
REACTOME_SIGNALING_BY_ALK_IN_CANCER	REACTOME_SIGNALING_BY_ALK_IN_CANCER	55	0.52168	1.59554	0.00497555	0.049859	0.0408351	6811	tags=51%, list=19%, signal=41%	7171/4478/6776/7414/7170/8454/2885/4869/5573/1639/27436/80304/6774/5335/471/9451/51530/5595/7175/6238/5903/4627/3799/10342/5295/57448/5594/4204/5495

## Sheet: CHEA_down_D0
Supplemental Table 3: Gene Ontology analysis and Transcription factors occupancy analysis for the de-regulated genes between wild type and KMT2D-sgRNA2 mediated knockout (KMT2D KO) HUDEP-2 cells.
Term	Overlap	P-value	Adjusted P-value	Old P-value	Old Adjusted P-value	Odds Ratio	Combined Score	Genes
GATA1 CHEA	50/807	5.81306e-19	5.40615e-17	0	0	5.42183	227.657	ACHE;COL18A1;SLC2A1;CPOX;SLC4A1;AQP1;SH3PXD2A;ZMIZ1;TUBB1;MYO18A;DPF3;JUNB;RGS6;SLC6A19;CISH;RAB3IL1;FRMD4A;RUNX3;SLFN14;BLVRB;SLC29A1;ZFPM1;SLC22A4;HEMGN;KCNE3;LTBP1;TSPAN32;ART4;FAM117A;ASIC4;HRH2;PLXNA2;TSPAN5;KCNN4;GAS2L1;RAB6B;TNK2;MICAL2;PDZK1IP1;UBAC1;EPOR;CCDC88B;SLC25A37;KRT19;SLC6A9;KIF26A;DLC1;CASS4;YPEL4;GPR146
GATA2 CHEA	31/772	1.58938e-07	7.39063e-06	0	0	3.17581	49.7164	CRB2;ACHE;COL18A1;DYSF;CPOX;SLC4A1;SPATC1L;FAM214B;TSPAN32;ART4;FAM117A;PTGS1;DNAJB2;ASIC4;SH3PXD2A;ZMIZ1;IMPA2;CREB3L1;MYO18A;TSPAN5;KCNN4;DUSP5;DUSP2;EGLN3;MICAL2;FRMD4A;PDZK1IP1;ARHGAP23;MYL4;DLC1;ZFPM1
SMAD4 CHEA	15/584	0.018595	0.460888	0	0	1.89787	7.56275	SMOX;KRT13;MICAL2;FRMD4A;LTBP2;JAKMIP1;NDRG1;SYNE3;DNAJB2;SH3PXD2A;DLC1;ID1;PLXNA2;LPIN1;PPFIA4
PPARD CHEA	9/285	0.0198231	0.460888	0	0	2.33092	9.13933	SPTBN4;CLIP2;LXN;IMPA2;IRS1;SMOX;PCOLCE;ITPR3;ANGPTL4
CTCF ENCODE	35/1790	0.0287047	0.466364	0	0	1.45633	5.17097	CRB2;ACHE;LAMA5;SMIM5;PHLDB1;LRP1;IRS1;NDUFA4L2;LTBP2;SLC2A4;FAM214B;ESPN;LTBP1;CLCN2;DNAJB2;PLXNA2;FAM65C;MAP3K6;GAS2L1;NTRK1;EGR1;EGR2;DMTN;SLC30A1;OTOP2;EHD2;NR4A1;SLC25A37;NCEH1;SLC6A8;RGCC;KIFC2;KIF26A;RGS10;BLVRB
MYOD1 ENCODE	6/166	0.030088	0.466364	0	0	2.66714	9.34466	SMIM5;SLC37A2;EGLN3;SDC4;SLC2A4;PPFIA4
RUNX1 CHEA	26/1294	0.0422388	0.520316	0	0	1.48366	4.69491	PRR5;ITGB2;SLC2A1;SLC4A1;TSPAN32;FAM117A;MKNK2;MYO18A;ITGB7;GGT1;MAP3K6;JUNB;EGR1;TMEM86B;DMTN;TNK2;FRMD4A;BAIAP2;UBAC1;EHD2;ESRP2;TREML2;CASS4;RGS10;CD69;ZFPM1
SMC3 ENCODE	24/1181	0.0447584	0.520316	0	0	1.4982	4.65412	CRB2;EGR1;ACHE;SMIM5;EGR2;PHLDB1;DMTN;CISH;LRP1;NDUFA4L2;SLC30A1;LTBP2;SLC2A4;FAM214B;LTBP1;DNAJB2;EHD2;NCEH1;KIFC2;ZMIZ1;KIF26A;PLXNA2;FAM65C;BLVRB
TP63 CHEA	27/1399	0.0583898	0.603361	0	0	1.42148	4.03788	IL1RN;PFKFB4;EPB42;AQP10;NDRG1;KIAA0930;SCPEP1;BAIAP2L2;SH3PXD2A;TRIM29;TSPAN5;GAS2L2;IER3;SEMA6B;EGR1;SLC37A2;DMTN;ARHGEF37;UBAC1;SHISA7;EPN3;CLIP2;SLC7A8;EPPK1;SLC29A1;ZFPM1;PTGES
ESR1 CHEA	5/154	0.0665201	0.618637	0	0	2.37939	6.44874	SH3PXD2A;LRP1;CAPN5;KIFC3;SLC29A1
TP53 CHEA	8/319	0.0820044	0.69331	0	0	1.82872	4.5736	AXL;RORA;FRMD4A;SLC30A1;KCNN4;ESPN;COX6B2;LTBP1
EZH2 ENCODE	8/338	0.105195	0.75684	0	0	1.72174	3.87726	KIF5A;BLVRB;HBA1;SLC2A4;OTOP2;COX6B2;EPOR;OSBP2
SUZ12 CHEA	30/1684	0.105795	0.75684	0	0	1.30542	2.9323	SLC22A4;ACHE;PHLDB1;TNXB;KCNE3;IRS1;DYSF;RORA;LTBP2;NDRG1;ZMIZ1;HRH2;PLXNA2;DPF3;PITX1;RAB6B;RGS6;HES5;EGR2;DUSP2;OLIG1;SNX22;EPOR;SLC7A8;MYO5B;RGS10;MAL;ZFPM1;CHST2;OSBP2
NFE2L2 CHEA	18/1022	0.19252	0.999996	0	0	1.27577	2.10191	PRRT1;EGLN3;ABCB6;IRS1;ITGB2;SLC30A1;TMC6;SNX22;TSKU;ARHGAP23;SCPEP1;PHOSPHO1;ZMIZ1;ADAMTSL4;PLXNA2;RGS10;HMOX1;BLVRB
UBTF ENCODE	27/1631	0.212265	0.999996	0	0	1.20051	1.86069	PHLDB1;SLC2A1;ESPN;CLCN2;FGFRL1;DNAJB2;ZMIZ1;IMPA2;DPF3;TSPAN5;N4BP3;GAS2L1;EGR1;DUSP5;EGR2;LRRC75A;SMOX;PTCH1;TNK2;SLC30A1;CLIP2;SLC25A37;SLC6A8;RGCC;SLC6A9;RGS10;LPIN1
ZBTB7A ENCODE	35/2184	0.227779	0.999996	0	0	1.16324	1.72087	SLC22A4;ACHE;LAMA5;LRP1;IRS1;CPOX;TMEM52;SLC2A4;NDRG1;CLCN2;TSKU;FAM117A;SCPEP1;ZMIZ1;ADAMTSL4;MKNK2;FAM65C;JUNB;IER3;EGR1;SMOX;MAFG-AS1;SLC30A1;BAIAP2;TUBA4A;EPOR;NR4A1;SLC25A37;KIFC2;ID1;REEP6;SLC29A1;AGRN;MIR210HG;ZFPM1
STAT5A ENCODE	5/233	0.230888	0.999996	0	0	1.54867	2.27008	DNAJB2;EGR1;SLC25A37;MST1;BLVRB
VDR CHEA	2/76	0.289373	0.999996	0	0	1.90303	2.35984	SLC37A2;CD69
TCF7L2 ENCODE	10/583	0.305054	0.999996	0	0	1.23297	1.46387	TMOD1;PHOSPHO1;LRP1;ZMIZ1;ID1;NATD1;DPF3;SLC30A1;SLC2A4;TSKU
RELA ENCODE	8/484	0.370928	0.999996	0	0	1.18466	1.17488	DNAJB2;DUSP2;ANGPTL6;ITGB2;MKNK2;CD69;JUNB;IER3
TCF3 ENCODE	13/840	0.400692	0.999996	0	0	1.10811	1.01343	EGR1;DUSP5;EGR2;DUSP2;EGLN3;SLC37A2;NHLRC4;TUBA4A;SLC25A39;ZMIZ1;ANGPTL6;SLC29A1;JUNB
RAD21 ENCODE	19/1265	0.415602	0.999996	0	0	1.07516	0.944015	CRB2;ACHE;DUSP5;SMIM5;EGR2;DMTN;NDUFA4L2;SLC2A4;FAM214B;LTBP1;DNAJB2;EHD2;NR4A1;NCEH1;KIFC2;KIF26A;PLXNA2;FAM65C;BLVRB
EZH2 CHEA	4/237	0.427175	0.999996	0	0	1.20767	1.0272	TNXB;DPF3;ZFPM1;PITX1
HNF4A ENCODE	19/1276	0.43064	0.999996	0	0	1.06511	0.897339	LAMA5;TMEM86B;ABCB6;IRS1;MST1;MAFG-AS1;GPT;SLC30A1;OTOP2;CYP4F12;CLCN2;TSPO2;SH3PXD2A;IMPA2;ESRP2;MYO5B;CLDN7;ID1;JUNB
REST CHEA	19/1280	0.436115	0.999996	0	0	1.0615	0.88089	SPTBN4;DUSP2;TMEM86B;LRP1;DYSF;CRIP2;RORA;JAKMIP1;SLC8A2;NR4A1;RIMS3;ZMIZ1;ANGPTL6;HRH2;MYO5B;EFHB;N4BP3;ZFPM1;OSBP2
STAT3 CHEA	3/177	0.454238	0.999996	0	0	1.21217	0.956564	ESRP2;DLC1;RUNX3
EGR1 CHEA	5/315	0.45495	0.999996	0	0	1.13423	0.893286	SELENBP1;EGR1;EGR2;TANGO2;TNK2
POU5F1 CHEA	4/261	0.500845	0.999996	0	0	1.09354	0.756136	RARG;ZMIZ1;PTCH1;MYO18A
FOSL2 ENCODE	3/196	0.521635	0.999996	0	0	1.09177	0.710513	SLC22A4;KRT19;PTPRH
ZMIZ1 ENCODE	13/914	0.522224	0.999996	0	0	1.01311	0.658177	EGR1;DUSP2;PIGQ;NDUFA4L2;SLC2A1;BAIAP2;NDRG1;TUBA4A;TSPAN32;SLC25A39;TBC1D10C;JUNB;IER3

## Sheet: CHEA_down_D3
Supplemental Table 3: Gene Ontology analysis and Transcription factors occupancy analysis for the de-regulated genes between wild type and KMT2D-sgRNA2 mediated knockout (KMT2D KO) HUDEP-2 cells.
Term	Overlap	P-value	Adjusted P-value	Old P-value	Old Adjusted P-value	Odds Ratio	Combined Score	Genes
GATA1 CHEA	89/807	3.66771e-16	3.81442e-14	0	0	2.93398	104.279	BCAR3;ACHE;COL18A1;BTG2;ATP8A2;ATP8A1;SLC2A1;PTPRJ;SLC4A1;PTPRF;AQP1;ANKRD9;STK11;CCND3;CA1;ZFP36;CREB3L3;ZMIZ1;BSG;TUBB1;DPF3;IER5;TBC1D22B;RGS6;SLC6A19;CISH;C21ORF58;NCOA4;RAB3IL1;FRMD4A;FOS;GCHFR;KAT2B;KEL;GFOD1;SLFN14;EHBP1L1;HMBS;TRIM58;BLVRB;UBE2V1;SLC29A1;ATG4D;PPP1R15A;SLC22A4;HEMGN;ASAH1;GYPC;FAXDC2;INSIG1;NPRL3;ENDOD1;ASAP1;SLC30A10;FOXO3;PPOX;ADIPOR1;LTBP1;RAP1GAP;FAM117A;ART4;AGPAT4;H…
GATA2 CHEA	67/772	4.99177e-08	2.59572e-06	0	0	2.18914	36.8058	BCAR3;ACHE;COL18A1;BTG2;CDKN1A;NARF;ATP8A2;SPATC1L;SLC4A1;FNBP1L;PTPRF;STK11;CCND3;ZMIZ1;IMPA2;IER5;TBC1D22B;CMKLR1;SLC36A1;SH3GLB2;SH2D3C;NCOA4;ATPIF1;ACSL6;FRMD4A;FOS;PISD;MYL4;GFOD1;TAL1;TXNIP;STX1A;PLIN5;CRB2;PPP1R15A;CEBPB;IGSF3;INSIG1;SLC30A10;FAM214B;ADIPOR1;PTGS1;FAM117A;SLC9A1;ART4;DNAJB2;KIAA0513;RNF213;MXI1;GCNT2;E2F2;TSPAN5;EGLN3;GADD45A;UROS;PDZK1IP1;ELL2;GADD45G;ARHGAP23;MOB1B;MLXIP…
TP53 CHEA	29/319	0.000146606	0.00494081	0	0	2.24857	19.8498	BTG2;CDKN1A;BTG1;RRAD;RORA;ADRB2;ESPN;LTBP1;BBC3;ALAD;TPO;PRX;SESN2;TP53INP1;GCNT2;PMAIP1;IER5;HES2;E2F7;GADD45A;GDF15;PLK2;SLC30A1;FRMD4A;COX6B2;KAT2B;ATG4A;ATF3;VAMP2
NELFE ENCODE	23/234	0.000226127	0.00494081	0	0	2.44382	20.5145	HEXIM1;BTG1;GADD45B;GADD45A;DUSP1;GDF15;WDR74;SNHG9;FOS;BAIAP2;ZBTB4;SNHG3;SLC9A1;HIST3H2A;SNHG12;DDIT3;KCNQ1OT1;BSG;SESN2;TNFSF9;PMAIP1;MALAT1;IER5
FOXA1 ENCODE	21/205	0.000237539	0.00494081	0	0	2.55633	21.3331	HEXIM1;PPP1R15A;ASAH1;BTG1;PNPLA7;ARRDC2;C21ORF58;WDR74;TPRG1L;FOS;ARRB2;FOXO3;SELENBP1;RNF213;BCL6;PPDPF;KLF9;TCP11L2;ULK1;TBC1D17;EZH1
CEBPB ENCODE	14/144	0.00398178	0.0690175	0	0	2.39915	13.2578	EIF4A1;CEBPB;PLEKHH3;GADD45A;WDR74;KLHL24;SLC7A11;SMAD6;ISG20;BCL6;DDIT3;E2F2;MAP3K8;CHAC1
CEBPD ENCODE	47/734	0.00502702	0.0746872	0	0	1.53897	8.14564	PPP1R15A;KLLN;HDAC5;EIF4A1;BTG2;CEBPB;BTG1;ABCB6;ZC3H6;SLC7A11;FOXO3;ZBTB4;PCSK4;FAM117A;SLC9A1;METTL12;DNAJB2;RPPH1;BSG;E2F2;MAP3K8;H1FX;IER5;KLF10;GADD45B;DUSP1;GADD45A;C21ORF58;ARRDC3;WDR74;SLC30A1;FOS;KLHL24;SMAD6;SNHG3;ISG20;H1F0;BCL6;DDIT3;HMBS;CAT;RSRP1;TXNIP;TNFSF9;MALAT1;REEP6;EZH1
STAT5A ENCODE	19/233	0.00634834	0.0825285	0	0	1.98081	10.022	CCDC71L;PPP1R15A;GADD45A;ATPIF1;MST1;WDR74;GPCPD1;PPOX;SNHG3;DNAJB2;RNF123;SOCS3;SLC25A37;BCL6;HMBS;EHBP1L1;THAP7-AS1;HYI;BLVRB
SMC3 ENCODE	67/1181	0.0144943	0.167489	0	0	1.35466	5.73563	BCAR3;CCDC71L;ACHE;BTG1;ATN1;HEPACAM2;PTPRJ;ARRB2;SLC2A4;CLU;PTPRF;PTMS;ZMIZ1;ADAMTSL2;FAM65C;PDK2;SLC36A1;CISH;DUSP1;CCDC114;TSC22D3;ARRDC3;SLC30A1;KIFC2;CATSPERG;EHBP1L1;BLVRB;OPTN;IRF9;KDM7A;CRB2;CEBPB;SMIM5;LRP1;RRAD;TPRG1L;LTBP2;FAM214B;LTBP1;THBS3;DNAJB2;SOCS3;RASD1;MICALCL;HBQ1;NDUFV2;CCR10;HEXIM1;DMTN;ACBD4;FZD5;GADD45B;NEK5;GADD45A;GDF15;PLK2;KLHL24;MAFA;ELL2;GADD45G;MAFB;NCEH1;KIF26A;SN…
MYOD1 ENCODE	13/166	0.0288215	0.299744	0	0	1.88838	6.69741	KLF10;TMEM120B;SMIM5;SLC37A2;CALCOCO1;EGLN3;SDC4;ATP2A1;MRGPRE;SLC2A4;MAFA;RUNDC3A;ELMO3
ZMIZ1 ENCODE	51/914	0.0389451	0.368208	0	0	1.32315	4.29441	EIF4A1;BTG2;BTG1;PIGQ;ATN1;SLC2A1;IRS2;ANKRD9;ZFP36;DDI2;SESN2;CHAC1;IER5;IER3;ELOVL1;DUSP1;ARRDC2;ARRDC3;TUBA4A;SNHG12;CAT;ULK1;TCTA;HAGH;ATG4D;CEBPB;INSIG1;NPRL3;MOSPD1;FOXO3;NDRG1;RASD1;HECTD4;HEXIM1;RBM38;TMEM120B;PNPLA7;GADD45B;GADD45A;TCEANC;SNHG9;BAIAP2;PNRC1;SNHG3;H1F0;SLC25A39;HIST3H2A;CR1L;FAM131A;CAPRIN2;CBLN3
BCL3 ENCODE	18/273	0.0515731	0.446967	0	0	1.56957	4.65339	HEXIM1;NANOS1;CDK11A;ROGDI;WDR74;ABCA7;NR1D2;HYPK;BBC3;SLC9A1;ISG20;EHBP1L1;FAM131A;MALAT1;HBQ1;LINC01465;IRF9;IER3
KLF4 CHEA	52/987	0.0840195	0.602574	0	0	1.24182	3.07562	CDKN1C;EIF4A1;ZNF296;CDKN1A;RARG;PTPRJ;OPLAH;LFNG;ZFP36;ZMIZ1;TUBB3;ACADS;DST;IFRD1;PPP2R5B;FOS;TXNIP;BLVRB;HAGH;IL6ST;SGK1;ATF3;IRF9;ATG4D;SLC22A4;PLEKHH3;STOML1;TMEM63C;NOTCH4;ITPR3;NDRG1;SOCS3;UCP2;HAS3;TDH;BMF;TBC1D17;HEXIM1;RBM38;CYB5A;CBX7;ACBD4;TCEANC;HSPA2;BAIAP2;KLF4;HYPK;SLC25A39;MAFB;CYP2S1;KLF9;SNAI1
FOSL2 ENCODE	13/196	0.0849984	0.602574	0	0	1.57632	3.88582	SLC22A4;KLF10;LINC01011;CCDC121;FAM46B;GADD45A;IFRD1;TCEANC;PPP2R5B;KIAA1683;ISG20;TUBB3;DDIT3
FOXP2 ENCODE	12/178	0.0869098	0.602574	0	0	1.60364	3.9175	ISG20;CDKN2D;BTG1;PIK3IP1;WDR74;TPRG1L;IRS2;TBC1D17;CSAD;PPOX;NDRG1;ZBTB4
RFX5 ENCODE	31/559	0.0965252	0.609112	0	0	1.30663	3.05483	PPP1R15A;CEBPB;BTG1;PLEKHH3;NRARP;PTMS;KCNQ1OT1;UCP2;TP53INP1;HSF4;MIR22HG;H1FX;DCAF11;CDKN2D;FAM46B;GADD45A;ARRDC3;SLC30A1;KCNAB2;KLHL24;GPCPD1;PNRC1;GADD45G;PER1;PIK3IP1;RBM14-RBM4;KLF9;FOSB;HAGH;LINC00167;CAPS2
EZH2 ENCODE	20/338	0.0995664	0.609112	0	0	1.39709	3.22298	ATP8A2;IGSF3;WDR74;SNX32;HBA1;SLC2A4;COX6B2;EPOR;MLXIPL;H1F0;KIF5A;CPAMD8;HAS3;TNFSF9;BLVRB;C14ORF37;DCAF11;MCF2L2;OSBP2;HES4
ZC3H11A ENCODE	9/129	0.108191	0.625104	0	0	1.66198	3.696	ACHE;ACBD4;GADD45B;TANGO2;PPDPF;ARRDC3;CLU;PTPRF;BEST1
TCF3 ENCODE	43/840	0.146415	0.773425	0	0	1.20057	2.30667	ASAH1;CEBPB;BTG1;INSIG1;ZC3H6;FOXO3;NOL3;NUDT4;RGS2;SHARPIN;ZMIZ1;TP53INP1;BSG;E2F2;MIR22HG;DNAJB9;CHAC1;E2F7;NANOS1;KLF10;TMEM120B;EGLN3;SLC37A2;GADD45B;DUSP1;IQSEC1;NHLRC4;ACSL1;GADD45A;PPP2R5B;NR1D2;MAFA;ELL2;TUBA4A;SLC25A39;ANGPTL6;SNAI1;MALAT1;SLC29A1;YPEL5;IL6ST;ATF3;YPEL3
RELA ENCODE	26/484	0.15355	0.773425	0	0	1.26059	2.36199	KLLN;C17ORF99;CCDC121;BTG1;ITGB2;ZBTB4;RND1;DNAJB2;MKNK2;PMAIP1;MAP3K8;LINC01465;IER5;IER3;KLF10;USP49;GADD45B;SYTL3;PNRC1;SNHG3;PAN2;ANGPTL6;IRF1;MALAT1;IL6ST;PFKM
NFIC ENCODE	16/279	0.156172	0.773425	0	0	1.34898	2.50478	KLF10;GADD45B;GADD45A;DUSP1;WDR74;FOS;PNRC1;SLC9A1;GCHFR;HSBP1L1;KLF9;MIR22HG;BMF;METTL7A;LINC00167;IRF9
NFE2L2 CHEA	51/1022	0.163871	0.774662	0	0	1.16903	2.11439	BCAR3;CDKN1A;BTG1;RASL11B;ITGB2;IRS2;SQRDL;SLC7A11;TSKU;SCPEP1;ZMIZ1;ADAMTSL4;TUBB3;ARRDC4;GABARAPL1;FKBPL;DUSP1;MMD;SLC30A1;GPCPD1;PHOSPHO1;PPDPF;CAT;BLVRB;SGK1;CEBPB;ABCB6;SLC30A10;SOCS3;APOL6;CHN2;TP53INP1;HMOX1;PRRT1;EGLN3;CDKN2B;NR1D2;SNX22;KLF4;PBX1;GADD45G;ARHGAP23;BCL6;KLHDC8A;CR1L;MAFF;KLF9;RGS10;YPEL5;GCLM;ZNF652
EGR1 CHEA	17/315	0.20913	0.937651	0	0	1.26409	1.97806	GADD45B;TANGO2;TNK2;MRGPRE;SLC30A10;BBC3;ALAD;SELENBP1;ZFP36;RASGEF1B;KLF9;HSF4;ALPL;BMF;CRYM;VAMP2;ZNF652
RUNX1 CHEA	62/1294	0.220392	0.937651	0	0	1.11908	1.69244	BTG2;ITPRIP;GPR68;ITGB2;SLC2A1;SLC4A1;CSAD;PTPRF;BBC3;ALAD;CCND3;GUK1;MAP3K8;FAM65A;GGT1;IER5;IZUMO4;DUSP1;ACSL1;ARRDC2;SH2D3C;NCOA4;FRMD4A;FOS;KCNAB2;KAT2B;TCTA;IL6ST;IRF9;STOML1;SCARNA10;INSIG1;NPRL3;ADIPOR1;FAM117A;SOCS3;APOL6;MKNK2;GCNT2;E2F2;NT5M;HEXIM1;CDKN2D;TMEM86B;DMTN;RIOK3;GADD45A;TNK2;BAIAP2;CLK3;UBAC1;MOB1B;HIST3H2A;TREML2;RGS10;ID3;MAGIX;YPEL5;EZH1;YPEL3;ZNF652;CPEB4
ESR1 CHEA	9/154	0.225397	0.937651	0	0	1.37362	2.04655	IGSF3;BCL6;LRP1;GDF15;CAPN5;ID3;BMF;FOS;SLC29A1
BHLHE40 ENCODE	18/348	0.253269	0.999995	0	0	1.20803	1.65899	KLF10;SLC36A1;EIF4A1;ZNF296;USP49;FAM46B;NR1D2;ZC3H6;FAM214B;FOXO3;BBC3;PER1;PIK3IP1;IMPA2;BSG;CREBRF;YPEL5;EZH1
RCOR1 ENCODE	33/702	0.339894	0.999995	0	0	1.09206	1.17847	PLEKHH3;NRARP;ARRB2;CCNDBP1;DNAJB2;ZMIZ1;UCP2;TBC1D22B;CCR10;IER3;HEXIM1;SH3GLB2;IZUMO4;FZD5;DUSP1;GADD45A;MMD;ABCA7;FOS;GPCPD1;GCHFR;ISG20;KAT2B;GFOD1;EHBP1L1;SNAI1;ULK1;HAGH;IL6ST;ST6GALNAC4;CBLN3;YPEL3;STX1A
NANOG CHEA	28/595	0.354059	0.999995	0	0	1.09278	1.13462	COL18A1;ZNF296;RARG;TTC23;NOTCH4;CYR61;RHD;SOCS3;FLCN;SALL4;HAS3;TDH;HEXIM1;CBX7;EGLN3;DST;LRRN2;NCOA4;BAIAP2;GADD45G;KAT2B;TMEM57;KLF9;SNAI1;ULK1;IL6ST;SGK1;MZF1
PPARD CHEA	14/285	0.354271	0.999995	0	0	1.14235	1.1854	KLF10;GADD45A;MMD;SMOX;ITPR3;ASAP1;PGF;CLIP2;IMPA2;COL6A2;CAT;TXNIP;MALAT1;ANGPTL4
PBX3 ENCODE	58/1269	0.355325	0.999995	0	0	1.06102	1.09786	KLLN;EIF4A1;NARF;BTG1;HIP1;ROGDI;IRS2;ZC3H6;RND1;METTL12;STK11;RPPH1;PODNL1;CREB3L3;GUK1;MIR22HG;SLC25A42;IER5;IER3;STARD5;IZUMO4;TANGO2;ANO8;WDR74;ZFYVE21;BPGM;KCNAB2;RHOB;SNHG12;MALAT1;HAGH;IL6ST;MZF1;KDM7A;PPP1R15A;NATD1;FOXO3;ZBTB4;FAM117A;DNAJB2;KIAA0513;SHARPIN;FLJ21408;BMF;DCAF11;HES4;HEXIM1;CYB5A;GADD45B;ABCA7;HSPA2;BAIAP2;MAFA;PBX1;PAN2;TMEM57;CREBRF;TMCC2

## Sheet: GO_down_D0
Supplemental Table 3: Gene Ontology analysis and Transcription factors occupancy analysis for the de-regulated genes between wild type and KMT2D-sgRNA2 mediated knockout (KMT2D KO) HUDEP-2 cells.
Term	Overlap	P-value	Adjusted P-value	Old P-value	Old Adjusted P-value	Odds Ratio	Combined Score	Genes
Positive Regulation Of Cell Death (GO:0010942)	12/50	3.53191e-12	5.62987e-09	0	0	23.1043	609.241	NTRK1;HBZ;RARG;HBG2;HBG1;BNIP3;ITGB2;HBB;CIDEB;HBD;HBA1;SNCA
Hydrogen Peroxide Catabolic Process (GO:0042744)	8/20	1.49591e-10	1.19224e-07	0	0	48.1245	1088.73	HBZ;PRDX2;HBM;HBG2;HBG1;HBB;HBA1;HBD
Oxygen Transport (GO:0015671)	6/10	1.46078e-09	7.76163e-07	0	0	107.536	2187.75	HBZ;HBG2;HBG1;HBB;HBA1;HBD
Carbon Dioxide Transport (GO:0015670)	6/11	3.17591e-09	1.2656e-06	0	0	86.0247	1683.3	HBZ;HBG2;HBG1;HBB;HBA1;HBD
Gas Transport (GO:0015669)	6/15	3.28152e-08	1.04615e-05	0	0	47.7818	823.394	HBZ;HBG2;HBG1;HBB;HBA1;HBD
One-Carbon Compound Transport (GO:0019755)	7/35	4.81612e-07	0.000127948	0	0	17.9662	261.339	HBZ;HBG2;HBG1;HBB;SLC4A1;HBD;HBA1
Cellular Response To Hypoxia (GO:0071456)	9/72	7.3688e-07	0.000165431	0	0	10.3235	145.777	EGLN3;RGCC;BNIP3;HMOX1;RORA;ADAM8;AQP3;NDRG1;AQP1
Cellular Response To Decreased Oxygen Levels (GO:0036294)	9/73	8.30269e-07	0.000165431	0	0	10.1617	142.279	EGLN3;RGCC;BNIP3;HMOX1;RORA;ADAM8;AQP3;NDRG1;AQP1
Regulation Of Cell Death (GO:0010941)	8/59	1.63854e-06	0.000290203	0	0	11.301	150.549	HBZ;HBG2;HBG1;HBB;CIDEB;HBD;HBA1;SNCA
Actin Crosslink Formation (GO:0051764)	4/11	1.1646e-05	0.00185637	0	0	40.6643	461.968	BAIAP2L2;BAIAP2;GAS2L1;GAS2L2
Vascular Transport (GO:0010232)	8/83	2.17896e-05	0.00315751	0	0	7.67531	82.3874	SLC7A8;LRP1;SLC6A9;SLC2A1;SLC2A4;ATP1B2;SLC29A1;SLC8A2
Transport Across Blood-Brain Barrier (GO:0150104)	8/85	2.59498e-05	0.003447	0	0	7.47519	78.9331	SLC7A8;LRP1;SLC6A9;SLC2A1;SLC2A4;ATP1B2;SLC29A1;SLC8A2
Renal Water Homeostasis (GO:0003091)	4/14	3.41689e-05	0.00418963	0	0	28.4606	292.695	MYO5B;AQP3;CYP4F12;AQP1
Nitrogen Compound Transport (GO:0071705)	10/163	0.000106549	0.0121314	0	0	4.71891	43.1634	SLC22A4;SLC6A19;SLC6A8;SLC7A8;HBB;HBA1;SLC29A1;RHCE;AQP1;RHD
Multicellular Organismal-Level Water Homeostasis (GO:0050891)	4/19	0.000125174	0.0133018	0	0	18.969	170.451	MYO5B;AQP3;CYP4F12;AQP1
Positive Regulation Of Cholesterol Efflux (GO:0010875)	4/22	0.000228522	0.0227665	0	0	15.8051	132.508	LRP1;PTCH1;ABCA7;PLTP
Protein Localization To Membrane (GO:0072657)	10/192	0.000401167	0.0368808	0	0	3.96111	30.9804	SPTBN4;EHD2;PTCH1;ITGB2;LRRC4;TSPAN5;ITGB7;AGRN;RAB6B;SYNE3
Negative Regulation Of Platelet-Derived Growth Factor Receptor Signaling Pathway (GO:0010642)	3/11	0.00041647	0.0368808	0	0	26.5886	206.957	NDRG4;LRP1;SNCA
Amino Acid Import Across Plasma Membrane (GO:0089718)	4/27	0.000518808	0.0435253	0	0	12.366	93.5364	SLC22A4;TSPO2;SLC6A9;SLC7A8
Positive Regulation Of Secretion By Cell (GO:1903532)	6/73	0.000564281	0.0449732	0	0	6.39957	47.8685	ACHE;RGCC;MYO18A;FRMD4A;ADAM8;SNCA
Positive Regulation Of Cholesterol Transport (GO:0032376)	4/31	0.00089004	0.0675582	0	0	10.5319	73.9786	LRP1;PTCH1;ABCA7;PLTP
Regulation Of Cholesterol Efflux (GO:0010874)	4/32	0.00100605	0.0721946	0	0	10.1552	70.0886	LRP1;PTCH1;ABCA7;PLTP
Sodium Ion Transmembrane Transport (GO:0035725)	6/82	0.00104502	0.0721946	0	0	5.63914	38.7054	SLC6A19;ASIC4;SLC6A8;SLC6A9;ATP1B2;SLC8A2
Actin Filament Bundle Assembly (GO:0051017)	4/33	0.00113229	0.0721946	0	0	9.80456	66.5094	BAIAP2L2;DMTN;ESPN;BAIAP2
Actin Filament Bundle Organization (GO:0061572)	4/33	0.00113229	0.0721946	0	0	9.80456	66.5094	BAIAP2L2;DMTN;ESPN;BAIAP2
Ammonium Homeostasis (GO:0097272)	2/5	0.00191274	0.112923	0	0	47.1111	294.879	RHCE;RHD
Positive Regulation Of Hemoglobin Biosynthetic Process (GO:0046985)	2/5	0.00191274	0.112923	0	0	47.1111	294.879	SLC25A37;SLC6A9
Response To Metal Ion (GO:0010038)	5/64	0.00204861	0.116625	0	0	6.0366	37.3701	IMPA2;ITPR3;AQP3;NDRG1;SNCA
Odontogenesis (GO:0042476)	4/39	0.00213075	0.117118	0	0	8.1213	49.9564	TUFT1;ROGDI;AQP3;AQP1
Heme Biosynthetic Process (GO:0006783)	3/19	0.00225059	0.119581	0	0	13.2889	81.0166	ALAS2;ABCB6;CPOX

## Sheet: GO_down_D3
Supplemental Table 3: Gene Ontology analysis and Transcription factors occupancy analysis for the de-regulated genes between wild type and KMT2D-sgRNA2 mediated knockout (KMT2D KO) HUDEP-2 cells.
Term	Overlap	P-value	Adjusted P-value	Old P-value	Old Adjusted P-value	Odds Ratio	Combined Score	Genes
Hydrogen Peroxide Catabolic Process (GO:0042744)	10/20	2.76916e-09	6.6626e-06	0	0	22.3139	439.689	HBZ;PRDX2;HBM;HBG2;HBG1;CAT;HBB;HBA1;HBD;HBQ1
Oxygen Transport (GO:0015671)	6/10	1.17938e-06	0.00141879	0	0	33.3258	454.914	HBZ;HBG2;HBG1;HBB;HBA1;HBD
Carbon Dioxide Transport (GO:0015670)	6/11	2.49917e-06	0.00200433	0	0	26.6592	343.892	HBZ;HBG2;HBG1;HBB;HBA1;HBD
Positive Regulation Of Cell Death (GO:0010942)	11/50	7.54845e-06	0.00454039	0	0	6.29146	74.2025	HBZ;RARG;HBG2;HBG1;ITGB2;HBB;CIDEB;HBD;HBA1;CLU;SNCA
Gas Transport (GO:0015669)	6/15	2.33114e-05	0.0112174	0	0	14.8076	157.946	HBZ;HBG2;HBG1;HBB;HBA1;HBD
Nonribosomal Peptide Biosynthetic Process (GO:0019184)	4/7	0.000110514	0.0443159	0	0	29.5558	269.264	CHAC1;HAGH;GCLM;GGT1
One-Carbon Compound Transport (GO:0019755)	7/35	0.00065149	0.223926	0	0	5.55378	40.7439	HBZ;HBG2;HBG1;HBB;SLC4A1;HBD;HBA1
Positive Regulation Of Hemoglobin Biosynthetic Process (GO:0046985)	3/5	0.000760215	0.228635	0	0	33.2135	238.537	SLC25A37;SLC6A9;KLF4
Regulation Of Cell Death (GO:0010941)	9/59	0.000928942	0.248337	0	0	4.00343	27.9498	HBZ;HBG2;HBG1;HBB;CIDEB;HBD;HBA1;CLU;SNCA
Heme Biosynthetic Process (GO:0006783)	5/19	0.00105862	0.254704	0	0	7.92136	54.2676	ALAD;ALAS2;ABCB6;UROS;HMBS
Regulation Of Hemoglobin Biosynthetic Process (GO:0046984)	3/6	0.00147138	0.293331	0	0	22.1412	144.395	SLC25A37;SLC6A9;KLF4
Glutathione Biosynthetic Process (GO:0006750)	3/6	0.00147138	0.293331	0	0	22.1412	144.395	HAGH;GCLM;GGT1
Intrinsic Apoptotic Signaling Pathway In Response To Endoplasmic Reticulum Stress (GO:0070059)	6/30	0.00158491	0.293331	0	0	5.54849	35.7724	PPP1R15A;CEBPB;DDIT3;ATP2A1;CHAC1;BBC3
Porphyrin-Containing Compound Biosynthetic Process (GO:0006779)	5/21	0.00172388	0.296261	0	0	6.93047	44.0998	ALAD;ALAS2;ABCB6;UROS;HMBS
Regulation Of Lipid Metabolic Process (GO:0019216)	8/54	0.00214136	0.343474	0	0	3.86435	23.7515	RNF213;CIDEB;IRS2;RORA;ABCA7;NR1D2;ADIPOR1;PCK1
Signal Transduction By P53 Class Mediator (GO:0072331)	6/33	0.00264721	0.398074	0	0	4.93122	29.2631	STK11;SESN2;PMAIP1;NDRG1;E2F7;PDK2
Response To Hydrogen Peroxide (GO:0042542)	7/46	0.00343194	0.485721	0	0	3.98503	22.6136	CAT;HBB;HMOX1;HBA1;CLU;AQP1;RHOB
Negative Regulation Of Lipase Activity (GO:0060192)	3/8	0.00385922	0.515848	0	0	13.2833	73.8194	RGS2;ANGPTL4;PLIN5
Cellular Response To Decreased Oxygen Levels (GO:0036294)	9/73	0.00419278	0.530939	0	0	3.12538	17.1096	EGLN3;RGCC;HMOX1;PMAIP1;RORA;ADAM8;NDRG1;AQP1;CPEB4
Positive Regulation Of Cellular Catabolic Process (GO:0031331)	14/146	0.00450453	0.541895	0	0	2.36255	12.7641	PLK2;NPRL3;IRS2;FOXO3;MLXIPL;FLCN;STK11;TP53INP1;TRIM58;ADAM8;ULK1;OPTN;PLIN5;SNCA
Nitrogen Compound Transport (GO:0071705)	15/163	0.00492257	0.563985	0	0	2.2584	12.001	ARRDC4;SLC22A4;SLC36A1;SLC6A19;ARRDC2;ARRDC3;HBB;HBA1;AQP1;RHD;TXNIP;SLC29A1;RHCE;VAMP2;ABCG2
Cellular Response To Glucocorticoid Stimulus (GO:0071385)	4/17	0.00530978	0.580697	0	0	6.81701	35.7089	ZFP36;KLF9;PCK1;AQP1
Intrinsic Apoptotic Signaling Pathway (GO:0097193)	11/105	0.00582117	0.608945	0	0	2.60277	13.3945	PPP1R15A;STK11;CDKN1A;CEBPB;DDIT3;PMAIP1;CIDEB;ATP2A1;CHAC1;PDK2;BBC3
Regulation Of Glucose Metabolic Process (GO:0010906)	5/28	0.0064799	0.64961	0	0	4.81943	24.2853	PMAIP1;IRS2;RORA;ADIPOR1;PDK2
Negative Regulation Of Growth (GO:0045926)	12/124	0.00763674	0.651625	0	0	2.38358	11.6195	DNAJB2;CDKN2D;FLCN;STK11;CDKN1A;BTG1;BCL6;SESN2;CAPRIN2;MT1X;PTPRJ;PRDM11
Regulation Of Inclusion Body Assembly (GO:0090083)	3/10	0.00774886	0.651625	0	0	9.4871	46.1093	DNAJB2;DNAJA4;HSPA2
Regulation Of Phospholipase Activity (GO:0010517)	3/10	0.00774886	0.651625	0	0	9.4871	46.1093	RGS2;LRP1;SNCA
Positive Regulation Of Transcription From RNA Polymerase II Promoter In Response To Endoplasmic Reticulum Stress (GO:1990440)	3/10	0.00774886	0.651625	0	0	9.4871	46.1093	CEBPB;CREB3L3;DDIT3
Regulation Of Release Of Cytochrome C From Mitochondria (GO:0090199)	6/41	0.00801777	0.651625	0	0	3.80249	18.3512	PMAIP1;CIDEB;BMF;NOL3;CLU;BBC3
Negative Regulation Of Cell Growth (GO:0030308)	12/125	0.00812499	0.651625	0	0	2.36237	11.3696	DNAJB2;CDKN2D;FLCN;STK11;CDKN1A;BTG1;BCL6;SESN2;CAPRIN2;ULK1;PTPRJ;PRDM11

[truncated: 2 more sheets: GO_K2D_dependent, CHEA_K2D_dependent]
