# Supplementary material for: The H3K4 methyltransferase KMT2D is an essential cofactor for GATA1 at erythroid gene enhancers
Source: Research Square preprint supplement (doi:10.21203/rs.3.rs-7853319/v1), 2025-10-22
Supplement: Supplementary file 9 [file b651f6dfd6e7ef8a64863c12.xlsx]

## Sheet: KMT2D_dependent_AE
Supplemental Table 9: Table S9, Integration analysis of all ChIP-seq data for KMT2D, GATA1, H3K4me1, H3K27ac.
seqnames	start	end	width	strand	annotation	geneChr	geneStart	geneEnd	geneLength	geneStrand	geneId	transcriptId	distanceToTSS	ENSEMBL	SYMBOL	GENENAME	flank_txIds	flank_geneIds	flank_gene_distances
chr1	32180	33174	995	*	Distal Intergenic	1	16858	29961	13104	2	653635	uc009vjb.1	-2219	NA	WASH7P	WASP family homolog 7, pseudogene	uc001aaa.3;uc010nxq.1;uc010nxr.1;uc001aak.3;uc009vis.3;uc001aae.4;uc009vit.3;uc009viu.3;uc001aac.4;uc001aah.4;uc009viq.3;uc009vir.3;uc009viv.2;uc009viw.2;uc009vix.2;uc009vjd.2;uc009viy.2;uc009viz.2;uc009vjc.1;uc001aai.1;uc010nxs.1;uc009vjb.1;uc009vje.2;uc009vjf.2;uc001aal.1	100287102;100287102;100287102;641702;653635;653635;653635;653635;653635;653635;653635;653635;653635;653635;653635;653635;653635;653635;653635;653635;653635;653635;653635;653635;79501	20306;20306;20306;2907;-15415;-12421;-12421;-12421;-2810;-2810;-2810;-2810;-2810;-2810;-2810;-14119;-2810;-2810;-14429;-12421;-2810;-2219;-2810;-2810;-35917
chr1	115400	116030	631	*	Distal Intergenic	1	134773	140566	5794	2	729737	uc021oeg.2	24536	NA	LOC729737	uncharacterized LOC729737	uc021oeg.2;uc001aal.1	729737;79501	24536;46309
chr1	228111	228802	692	*	Distal Intergenic	1	134773	140566	5794	2	729737	uc021oeg.2	-87545	NA	LOC729737	uncharacterized LOC729737	NA	NA	NA
chr1	1196474	1197001	528	*	Intron (uc001adm.4/118424, intron 3 of 6)	1	1189292	1203372	14081	2	118424	uc001adm.4	6371	ENSG00000160087	UBE2J2	ubiquitin conjugating enzyme E2 J2	uc001ady.2;uc001aea.2;uc001aeb.2;uc001aec.1;uc001adm.4;uc001ado.3;uc001adp.3;uc001adq.3;uc001adr.3;uc001aed.3;uc010nyi.2;uc009vjx.3;uc001adk.3;uc001adl.2;uc001adg.3;uc001adh.4;uc001adi.4;uc009vjw.3;uc001adj.1;uc009vjy.1;uc001aee.2;uc001aef.2;uc001aeg.2;uc001aeh.2;uc001aei.2;uc001aek.2;uc009vjz.2;uc010nyj.2;uc001adt.1;uc001adu.1;uc001adv.2;uc001adw.2;uc001adx.2;uc001ade.3;uc001adf.3	116983;116983;116983;116983;118424;118424;118424;118424;118424;126789;126789;126789;126792;388581;51150;51150;51150;51150;51150;54973;54973;54973;54973;54973;54973;54973;54973;54973;6339;6339;6339;6339;6339;7293;7293	37334;44308;46268;47988;0;0;0;0;0;-46993;-46993;-47465;28845;-14372;-39743;-29027;-29027;-29027;-37126;55829;63066;63066;63066;63066;63066;63066;63066;63066;-18815;-18815;-20488;-20488;-20536;-46926;-46926
chr1	1583022	1583962	941	*	Intron (uc001ags.1/984, intron 2 of 15)	1	1577747	1580625	2879	2	984	uc010nyr.1	-2397	ENSG00000248333	CDK11B	cyclin dependent kinase 11B	uc021oet.1;uc001agg.3;uc001agh.3;uc001agi.3;uc001agj.3;uc001agk.3;uc001agl.2;uc001agm.3;uc010nyq.2;uc009vkh.3;uc001agn.3;uc001ago.3;uc021oes.1;uc009vkl.2;uc001ahe.4;uc001ahf.4;uc001ahg.4;uc001ahh.4;uc021oeu.1;uc009vkn.2;uc001agp.3;uc001agq.3;uc001agr.3;uc009vki.3;uc001ahi.1;uc009vko.1;uc009vkj.2;uc001ags.1;uc001agt.1;uc001agv.1;uc001agw.1;uc001agx.1;uc001agy.1;uc001agz.1;uc001aha.1;uc010nyr.1	142678;142678;142678;142678;142678;142678;142678;142678;142678;142678;142678;142678;643988;728661;728661;728661;728661;728661;728661;728661;8510;8510;8510;8510;8511;8511;984;984;984;984;984;984;984;984;984;984	32227;32227;32227;32227;32227;32227;31777;31777;31332;23868;22651;18536;-47546;40281;17616;40281;40281;93476;24323;40281;15462;15462;14860;14455;-47416;-47824;-6285;0;0;0;0;0;0;0;0;-2397
chr1	2516970	2518019	1050	*	Promoter (<=1kb)	1	2517899	2522908	5010	1	127281	uc021oew.1	0	ENSG00000157870	PRXL2B	peroxiredoxin like 2B	uc021oev.1;uc001ajo.2;uc001ajp.2;uc001ajq.2;uc021oew.1;uc021oex.1;uc001aju.3;uc001ajv.2;uc001ajw.2;uc010nzd.2;uc010nze.2;uc010nzf.2;uc001ajx.2;uc009vlg.1;uc001ajy.2;uc010nzc.1;uc009vlf.1;uc001ajt.1;uc001ajr.3	100133445;115110;115110;115110;127281;127281;127281;127281;127281;127281;127281;127281;127281;79258;79258;8764;8764;8764;8764	-28520;-32686;-32686;-32686;0;0;-170;-170;-170;-170;-170;-170;-498;42941;46462;29165;29165;29165;29165
chr1	3690893	3692662	1770	*	Promoter (1-2kb)	1	3689352	3692546	3195	1	388588	uc001akw.4	1541	ENSG00000235169	SMIM1	small integral membrane protein 1 (Vel blood group)	uc001akv.2;uc031pkx.1;uc001akw.4;uc001akt.4;uc009vlm.3;uc021ofj.1;uc021ofk.1;uc021ofl.1;uc001akx.1;uc001akp.3;uc021ofb.1;uc021ofc.1;uc021ofd.1;uc021ofe.1;uc021off.1;uc010nzj.2;uc001akr.3;uc001aks.3;uc009vlk.2;uc021ofg.1;uc021ofh.1;uc021ofi.1;uc010nzk.2;uc010nzl.2;uc001aky.2;uc010nzm.1;uc031pky.1	148870;388588;388588;57212;57212;57212;57212;57212;57470;7161;7161;7161;7161;7161;7161;7161;7161;7161;7161;7161;7161;7161;7161;7161;9731;9731;9731	21928;0;0;-27558;-26956;-26956;-26956;-26956;20406;121764;121764;121764;121764;121764;121764;83657;83657;83657;83657;83657;83657;83657;76283;46851;81135;81135;61054
chr1	6732307	6733165	859	*	Intron (uc001aof.2/55735, intron 3 of 15)	1	6694228	6761966	67739	2	55735	uc001aof.2	28801	ENSG00000007923	DNAJC11	DnaJ heat shock protein family (Hsp40) member C11	uc001aob.4;uc001aof.2;uc001aog.2;uc010nzu.1;uc001aoc.3;uc001aod.3;uc001aoe.2	148479;55735;55735;55735;90326;90326;90326	58551;0;0;0;47382;47097;47097
chr1	8064541	8065555	1015	*	Distal Intergenic	1	8073487	8075752	2266	2	54206	uc001apa.1	10197	ENSG00000116285	ERRFI1	ERBB receptor feedback inhibitor 1	uc001aou.4;uc001aov.4;uc001aox.4;uc001aoz.3;uc001apa.1	11315;11315;11315;54206;54206	42827;42827;42827;20838;10197
chr1	8257428	8258363	936	*	Distal Intergenic	1	8384390	8404227	19838	1	50651	uc001apb.3	-126027	ENSG00000162426	SLC45A1	solute carrier family 45 member 1	NA	NA	NA
chr1	8601992	8602729	738	*	Intron (uc001ape.3/473, intron 7 of 23)	1	8420172	8585844	165673	2	473	uc010nzx.1	-16148	ENSG00000142599	RERE	arginine-glutamic acid dipeptide repeats	uc001ape.3;uc001apf.3;uc010nzx.1;uc001aph.1	473;473;473;473	0;0;-16148;0
chr1	12065415	12066162	748	*	Exon (uc001atn.4/9927, exon 15 of 19)	1	12079299	12092106	12808	1	60672	uc001ato.2	-13137	ENSG00000116691	MIIP	migration and invasion inhibitory protein	uc001atm.3;uc010obb.2;uc001ato.2;uc001atn.4;uc009vni.3	5351;5351;60672;9927;9927	70691;70691;-13137;0;0
chr1	12508573	12509619	1047	*	Intron (uc001atv.3/55187, intron 65 of 69)	1	12469884	12572098	102215	1	55187	uc010obd.2	38689	ENSG00000048707	VPS13D	vacuolar protein sorting 13 homolog D	uc001atv.3;uc001atw.3;uc001atx.3;uc009vnl.3;uc010obd.2	55187;55187;55187;55187;55187	0;0;0;0;0
chr1	15109178	15111733	2556	*	Intron (uc009vog.1/23254, intron 1 of 7)	1	15250625	15394651	144027	1	23254	uc001avo.2	-138892	ENSG00000189337	KAZN	kazrin, periplakin interacting protein	uc009vog.1;uc001avm.4	23254;23254	0;0
chr1	15109178	15111733	2556	*	Intron (uc009vog.1/23254, intron 1 of 7)	1	15250625	15394651	144027	1	23254	uc001avo.2	-138892	ENSG00000189337	KAZN	kazrin, periplakin interacting protein	uc009vog.1;uc001avm.4	23254;23254	0;0
chr1	15750452	15751245	794	*	Intron (uc001awh.2/79180, intron 1 of 3)	1	15764938	15773153	8216	1	11330	uc001awi.1	-13693	ENSG00000162438	CTRC	chymotrypsin C	uc001awi.1;uc001awj.1;uc001awb.2;uc001awd.1;uc010obl.1;uc001awe.1;uc001awg.3;uc001awk.3;uc001awh.2	11330;11330;114827;114827;114827;114827;114827;63036;79180	-13693;-13693;176684;82220;78873;78540;43255;-31978;0
chr1	16970270	16972100	1831	*	Promoter (<=1kb)	1	16972069	16974587	2519	1	11209	uc009vow.2	0	NA	MST1P2	macrophage stimulating 1 pseudogene 2	uc021ogy.1;uc009vow.2;uc010ocg.1;uc010och.2;uc010oci.1;uc001azk.2;uc001azm.4;uc009vox.3;uc001azn.1;uc001ayw.4;uc001aza.5;uc001azb.1;uc001azc.2;uc010ocf.2;uc001aze.3;uc009vov.2;uc001azf.3;uc001azg.1	100500876;11209;11209;11209;11209;11209;11209;11209;284729;55672;55672;55672;55672;84809;84809;84809;84809;84809	-35650;0;0;0;-764;-764;-1808;-1808;74552;-30170;-30170;-30518;-30170;-17276;-12666;-12666;-10429;0
chr1	19229067	19230137	1071	*	Promoter (<=1kb)	1	19197924	19229293	31370	2	8659	uc001bbb.3	0	ENSG00000159423	ALDH4A1	aldehyde dehydrogenase 4 family member A1	uc021ohm.2;uc001bbd.2;uc001bba.1;uc010ocu.2;uc001bbb.3;uc001bbc.3;uc021ohl.1	100616120;126917;80834;8659;8659;8659;8659	-19298;0;-42912;-11682;0;0;0
chr1	19235117	19236440	1324	*	Exon (uc001bbd.2/126917, exon 9 of 9)	1	19197924	19229293	31370	2	8659	uc021ohl.1	-5824	ENSG00000159423	ALDH4A1	aldehyde dehydrogenase 4 family member A1	uc021ohm.2;uc001bbd.2;uc001bba.1;uc010ocu.2;uc001bbb.3;uc001bbc.3;uc021ohl.1	100616120;126917;80834;8659;8659;8659;8659	-25348;0;-48962;-17732;0;0;0
chr1	19811822	19812843	1022	*	Promoter (<=1kb)	1	19665267	19812066	146800	2	832	uc001bce.3	0	ENSG00000077549	CAPZB	capping actin protein of muscle Z-line subunit beta	uc010ocz.2;uc001bce.3;uc009vpk.3;uc021ohr.1	832;832;832;832	-621;0;0;0
chr1	19939243	19940518	1276	*	Intron (uc001bch.2/440574, intron 1 of 4)	1	19934301	19935138	838	1	644068	uc021ohx.2	4942	NA	RPS14P3	ribosomal protein S14 pseudogene 3	uc009vpl.2;uc021ohw.1;uc001bch.2;uc001bci.2;uc021oht.1;uc021ohu.1;uc021ohv.1;uc001bcj.2;uc031plj.1;uc031plk.1;uc009vpm.2;uc001bck.3;uc021ohy.2;uc021ohz.1;uc031pll.1;uc021ohx.2	100532736;100532736;440574;440574;440574;440574;440574;4681;4681;4681;4681;4681;4681;4681;4681;644068	0;0;0;0;0;0;0;-29205;-29205;-29385;-29690;-30149;-31348;-31742;-33586;4942
chr1	20523934	20524404	471	*	Distal Intergenic	1	20512578	20519942	7365	1	127733	uc001bdb.3	11356	ENSG00000162543	UBXN10	UBX domain protein 10	uc001bdb.3;uc009vpq.1;uc009vpp.1	127733;391013;64600	11356;-22247;58111
chr1	21958376	21959619	1244	*	Intron (uc001bew.3/5909, intron 2 of 24)	1	21943799	21949011	5213	2	5909	uc001bez.1	-9365	ENSG00000076864	RAP1GAP	RAP1 GTPase activating protein	uc001bev.3;uc001bew.3;uc001bex.3;uc001bey.3;uc001bez.1;uc001bfa.3;uc001bfb.3;uc001bfc.3;uc009vqc.3;uc010odq.2	5909;5909;5909;5909;5909;84196;84196;84196;84196;84196	-11833;0;0;0;-9365;91993;150069;150069;150069;150069
chr1	22002291	22002957	667	*	Distal Intergenic	1	21922708	21995856	73149	2	5909	uc001bey.3	-6435	ENSG00000076864	RAP1GAP	RAP1 GTPase activating protein	uc001bew.3;uc001bex.3;uc001bey.3;uc001bfa.3;uc001bfb.3;uc001bfc.3;uc009vqc.3;uc010odq.2;uc001bfd.1;uc001bfe.1	5909;5909;5909;84196;84196;84196;84196;84196;84196;84196	0;0;0;48655;106731;106731;106731;106731;28151;106731
chr1	22231161	22232115	955	*	Intron (uc001bfj.3/3339, intron 1 of 96)	1	22213708	22222803	9096	2	3339	uc009vqe.1	-8358	ENSG00000142798	HSPG2	heparan sulfate proteoglycan 2	uc001bfj.3;uc009vqd.3;uc009vqe.1	3339;3339;3339	0;0;-8358
chr1	23851043	23851847	805	*	Intron (uc001bhe.2/1870, intron 1 of 6)	1	23832920	23857712	24793	2	1870	uc001bhe.2	5865	ENSG00000007968	E2F2	E2F transcription factor 2	uc001bhe.2;uc001bhh.4;uc010odz.1;uc001bha.2;uc010oea.1;uc001bhc.1	1870;3399;55616;55616;55616;55616	0;34438;-40366;-40293;-40293;-39986
chr1	24246392	24247807	1416	*	Distal Intergenic	1	24200460	24239817	39358	2	1269	uc001bif.3	-6575	ENSG00000188822	CNR2	cannabinoid receptor 2	uc021oik.1;uc001bij.2;uc021oin.1;uc021oio.1;uc021oip.1;uc021oiq.1;uc021oir.1;uc021ois.1;uc001bif.3;uc001big.3	100616492;10772;10772;10772;10772;10772;10772;10772;1269;55629	-7753;59146;59146;59146;59146;59146;59146;59146;-6575;-38494
chr1	25558941	25560244	1304	*	Promoter (<=1kb)	1	25548767	25559013	10247	2	25949	uc001bjt.1	0	ENSG00000117614	SYF2	SYF2 pre-mRNA splicing factor	uc001bjt.1;uc001bju.1;uc010oeo.1;uc001bjv.1;uc001bjw.3;uc021oji.1;uc021ojj.1;uc010oep.2;uc001bjz.3;uc001bka.3;uc001bkb.3;uc001bkc.3;uc009vrm.3;uc009vrn.3;uc009vro.3;uc009vrp.3	25949;25949;25949;25949;57035;57035;57035;6007;6007;6007;6007;6007;6007;6007;6007;6007	0;0;0;0;13741;13741;0;0;0;0;0;0;0;0;0;0
chr1	25605412	25606895	1484	*	Intron (uc010oep.2/6007, intron 1 of 6)	1	25598981	25656936	57956	1	6007	uc009vrp.3	6431	ENSG00000187010	RHD	Rh blood group D antigen	uc001bjt.1;uc001bju.1;uc010oeo.1;uc001bjv.1;uc001bjw.3;uc021oji.1;uc021ojj.1;uc010oep.2;uc001bjz.3;uc001bka.3;uc001bkb.3;uc001bkc.3;uc009vrm.3;uc009vrn.3;uc009vro.3;uc009vrp.3	25949;25949;25949;25949;57035;57035;57035;6007;6007;6007;6007;6007;6007;6007;6007;6007	0;0;0;0;-31427;-31427;0;0;0;0;0;0;0;0;0;0
chr1	25611218	25612259	1042	*	5' UTR	1	25598981	25656936	57956	1	6007	uc009vrp.3	12237	ENSG00000187010	RHD	Rh blood group D antigen	uc001bjw.3;uc021oji.1;uc021ojj.1;uc010oep.2;uc001bjz.3;uc001bka.3;uc001bkb.3;uc001bkc.3;uc009vrm.3;uc009vrn.3;uc009vro.3;uc009vrp.3	57035;57035;57035;6007;6007;6007;6007;6007;6007;6007;6007;6007	-37233;-37233;0;0;0;0;0;0;0;0;0;0
chr1	25649178	25649832	655	*	Intron (uc001bjz.3/6007, intron 9 of 9)	1	25568740	25664656	95917	2	57035	uc021ojj.1	14824	ENSG00000117616	RSRP1	arginine and serine rich protein 1	uc001bke.3;uc009vrr.3;uc009vrs.3;uc010oeq.2;uc021ojj.1;uc001bkf.3;uc001bkg.3;uc001bkh.3;uc001bki.3;uc031pln.1;uc031plo.1;uc001bkj.3;uc010oep.2;uc001bjz.3;uc001bka.3;uc001bkb.3;uc001bkc.3;uc009vrm.3;uc009vrn.3;uc009vro.3;uc009vrp.3	23585;23585;23585;23585;57035;6006;6006;6006;6006;6006;6006;6006;6007;6007;6007;6007;6007;6007;6007;6007;6007	-14957;-14957;-14957;-14957;0;0;0;0;0;0;0;0;0;0;0;0;0;0;0;0;0
chr1	25694592	25695332	741	*	Intron (uc001bkf.3/6006, intron 9 of 9)	1	25664789	25688852	24064	1	23585	uc010oeq.2	29803	ENSG00000183726	TMEM50A	transmembrane protein 50A	uc001bke.3;uc009vrr.3;uc009vrs.3;uc010oeq.2;uc021ojj.1;uc001bkf.3;uc001bkg.3;uc001bkh.3;uc001bki.3;uc031pln.1;uc031plo.1;uc001bkj.3;uc001bjz.3;uc001bka.3;uc001bkb.3;uc001bkc.3;uc009vrm.3;uc009vrn.3;uc009vro.3;uc009vrp.3	23585;23585;23585;23585;57035;6006;6006;6006;6006;6006;6006;6006;6007;6007;6007;6007;6007;6007;6007;6007	29803;29803;29803;29803;0;0;0;0;0;0;0;0;0;0;0;0;0;0;0;0
chr1	25739400	25740725	1326	*	Intron (uc001bkf.3/6006, intron 1 of 9)	1	25688740	25747363	58624	2	6006	uc001bkf.3	6638	ENSG00000188672	RHCE	Rh blood group CcEe antigens	uc009vrt.2;uc001bkk.3;uc009vru.3;uc009vrv.3;uc001bkf.3;uc001bkg.3;uc001bkh.3;uc001bki.3;uc031pln.1;uc031plo.1;uc001bkj.3	55219;55219;55219;55219;6006;6006;6006;6006;6006;6006;6006	-16663;-16663;-16663;-16663;0;0;0;0;0;0;0
chr1	26180669	26181393	725	*	Intron (uc001bkw.1/79000, intron 1 of 2)	1	26160497	26185848	25352	2	79000	uc001bkw.1	4455	ENSG00000127423	AUNIP	aurora kinase A and ninein interacting protein	uc001bkx.3;uc001bky.3;uc010oev.2;uc001bkz.3;uc001bla.3;uc001blb.3;uc001blc.3;uc001bkq.4;uc001bkr.4;uc009vrz.3;uc010oet.2;uc001bks.4;uc001bkt.4;uc001bku.4;uc001bkv.4;uc021ojk.1;uc021ojl.1;uc010oeu.1;uc001bkw.1	164091;3925;3925;3925;3925;3925;3925;56181;56181;56181;56181;56181;56181;56181;56181;57190;57190;646471;79000	16351;37705;51600;51251;51600;51600;51975;34272;34272;34272;34272;33985;33350;31648;28546;54002;54002;-30572;0
chr1	26704663	26705571	909	*	Distal Intergenic	1	26688125	26699266	11142	2	257101	uc009vsj.1	-5397	ENSG00000176083	ZNF683	zinc finger protein 683	uc001bmg.1;uc001bmh.1;uc009vsj.1;uc001bmd.4;uc001bmf.3;uc001bmi.1;uc001bmj.3	257101;257101;257101;55057;55057;79727;79727	-5397;-5397;-5397;-24042;-39695;-31698;-31698
chr1	27018723	27019968	1246	*	Distal Intergenic	1	27022522	27102198	79677	1	8289	uc001bmt.1	-2554	ENSG00000117713	ARID1A	AT-rich interaction domain 1A	uc001bmt.1;uc001bmu.1;uc001bmv.1;uc001bmw.1	8289;8289;8289;8289	-2554;-2554;-2554;-35903
chr1	27113253	27113953	701	*	Promoter (<=1kb)	1	27114454	27124894	10441	1	55650	uc001bmz.3	-501	ENSG00000060642	PIGV	phosphatidylinositol glycan anchor biosynthesis class V	uc001bmz.3;uc001bna.3;uc010ofg.2;uc001bmt.1;uc001bmu.1;uc001bmv.1;uc001bmw.1;uc001bmx.1;uc009vsm.1;uc009vsn.1;uc001bnb.3;uc010ofh.1	55650;55650;55650;8289;8289;8289;8289;8289;8289;8289;84243;84243	-501;-726;-726;90731;90731;90731;57382;15643;13947;12433;-39248;-44556
chr1	27868659	27869816	1158	*	Intron (uc009vsy.3/27245, intron 6 of 6)	1	27730734	27816678	85945	2	10163	uc010ofl.2	-51981	ENSG00000158195	WASF2	WASP family member 2	uc009vsy.3;uc009vsz.1;uc001boh.1	27245;27245;27245	0;60327;60545
chr1	29210126	29211922	1797	*	Promoter (1-2kb)	1	29213603	29446558	232956	1	2035	uc001brg.2	-1681	ENSG00000159023	EPB41	erythrocyte membrane protein band 4.1	uc001brg.2;uc001brh.2;uc001bri.2;uc001brj.2;uc001brm.2;uc009vtk.2;uc001brk.3;uc001brl.2;uc001brf.1	2035;2035;2035;2035;2035;2035;2035;2035;4985	-1681;-1681;-1681;-1681;-1681;-29166;-29166;-29166;71472
chr1	29483129	29484051	923	*	Intron (uc001bro.3/6429, intron 3 of 5)	1	29474250	29508637	34388	2	6429	uc001bro.3	24586	ENSG00000116350	SRSF4	serine and arginine rich splicing factor 4	uc001brg.2;uc001brh.2;uc001bri.2;uc001brj.2;uc001brm.2;uc001brl.2;uc021okg.1;uc009vtl.2;uc009vtm.2;uc009vtn.2;uc021okh.1;uc001brn.2;uc001brp.1;uc001brq.1;uc001brt.1;uc010ofz.1;uc001bro.3;uc010ofy.2;uc009vtp.2	2035;2035;2035;2035;2035;2035;2035;2035;2035;2035;399474;399474;51102;51102;51102;51102;6429;6429;6429	269526;269526;269526;269526;269526;242041;169186;169169;169169;72720;-34116;-32708;73403;73403;73403;73403;0;0;0
chr1	31241474	31242457	984	*	Distal Intergenic	1	31205315	31230683	25369	2	7805	uc001bsc.2	-10791	ENSG00000162511	LAPTM5	lysosomal protein transmembrane 5	uc001bsb.1;uc021okj.1;uc001brz.3;uc001bsc.2	100129196;100616164;4146;7805	49855;-29395;-45042;-10791
chr1	32292298	32293205	908	*	Distal Intergenic	1	32256031	32281580	25550	2	90853	uc001btv.3	-10718	ENSG00000134668	SPOCD1	SPOC domain containing 1	uc001bts.1;uc001btu.3;uc001btv.3;uc021oks.1;uc001btw.1	90853;90853;90853;90853;90853	-10718;-10718;-10718;-27926;-28066
chr1	32403884	32404398	515	*	Promoter (<=1kb)	1	32372022	32403988	31967	2	8073	uc001bty.2	0	ENSG00000184007	PTP4A2	protein tyrosine phosphatase 4A2	uc001btx.2;uc010ogs.2;uc001bty.2	8073;8073;8073	-18625;-18625;0
chr1	32598977	32599540	564	*	Intron (uc001bug.3/23633, intron 1 of 13)	1	32608580	32642168	33589	1	23633	uc010ogy.2	-9040	ENSG00000025800	KPNA6	karyopherin subunit alpha 6	uc001bui.3;uc001buj.3;uc001bug.3;uc001buh.3;uc010ogx.2;uc010ogy.2;uc010ogt.1;uc010ogu.1;uc001buf.4;uc010ogv.2;uc010ogw.2	200081;200081;23633;23633;23633;23633;55116;55116;55116;55116;55116	-45805;-46126;0;0;0;-9040;60474;60474;60474;60474;60474
chr1	33222702	33223662	961	*	Intron (uc001bvu.1/57648, intron 1 of 6)	1	33219687	33240571	20885	1	57648	uc010ohm.1	3015	ENSG00000162522	NHSL3	NHS like 3	uc001bvu.1;uc010ohm.1;uc001bvv.2;uc010ohn.1;uc001bvw.1;uc001bvx.1;uc001bvy.1	57648;57648;57648;57648;8565;8565;8565	0;0;-7573;-7573;24042;25694;59971
chr1	35128264	35129351	1088	*	Distal Intergenic	1	35220648	35224113	3466	1	2709	uc001bxu.4	-91297	ENSG00000189280	GJB5	gap junction protein beta 5	NA	NA	NA
chr1	39281332	39282107	776	*	Distal Intergenic	1	39303869	39325495	21627	2	64121	uc001ccq.3	43388	ENSG00000116954	RRAGC	Ras related GTP binding C	uc021olq.1;uc001ccs.3;uc001ccq.3;uc010oim.2;uc001ccr.3	100527950;26292;64121;64121;64121	65191;56943;43388;43388;58059
chr1	39380657	39381704	1048	*	3' UTR	1	39351479	39385009	33531	2	54933	uc010oin.1	3305	ENSG00000158315	RHBDL2	rhomboid like 2	uc021olq.1;uc001ccs.3;uc010oin.1;uc010oio.1;uc001ccu.1;uc001ccv.3;uc001ccr.3	100527950;26292;54933;54933;54933;54933;64121	-33359;-41607;0;0;0;0;-40491
chr1	40222852	40223864	1013	*	Exon (uc021oly.1/uc021oly.1, exon 1 of 1)	1	40235197	40237020	1824	2	64064	uc001ceb.1	13156	ENSG00000198754	OXCT2	3-oxoacid CoA-transferase 2	uc001cds.2;uc001cdt.2;uc001cdu.2;uc010oiy.2;uc001cdv.3;uc001cdw.3;uc001cdx.2;uc001ceb.1;uc001cdz.1;uc001cea.1	10450;10450;10450;10450;10450;10450;10450;64064;656;656	18335;18335;18335;18335;0;0;14675;13156;30669;30669
chr1	41099290	41100237	948	*	Intron (uc001cfu.1/9783, intron 4 of 7)	1	41086352	41131324	44973	2	9783	uc001cfu.1	31087	ENSG00000117016	RIMS3	regulating synaptic membrane exocytosis 3	uc001cfu.1;uc001cfv.1	9783;9783	0;0
chr1	43290309	43291551	1243	*	Promoter (<=1kb)	1	43291249	43310660	19412	1	114625	uc001cie.1	0	ENSG00000164010	ERMAP	erythroblast membrane associated protein (Scianna blood group)	uc021omg.1;uc010ojw.1;uc001cic.1;uc001cid.1;uc001cie.1;uc001cif.1;uc001cib.2;uc001cig.3;uc009vwm.3;uc021omh.1;uc001cih.3;uc001cia.4	100129924;114625;114625;114625;114625;114625;374969;51058;51058;51058;51058;79078	36648;0;0;0;0;-4035;-7250;-20693;-20693;-20693;-23411;57393
chr1	43401750	43402786	1037	*	Intron (uc001cik.2/6513, intron 2 of 9)	1	43424720	43449029	24310	1	440584	uc001cil.3	-21934	ENSG00000227533	SLC2A1-DT	SLC2A1 divergent transcript	uc001cil.3;uc001cik.2	440584;6513	0;0
chr1	43428475	43430030	1556	*	Intron (uc001cil.3/440584, intron 1 of 3)	1	43391046	43424847	33802	2	6513	uc001cik.2	-3628	ENSG00000117394	SLC2A1	solute carrier family 2 member 1	uc001cil.3;uc001cik.2	440584;6513	0;0
chr1	43535164	43535719	556	*	Distal Intergenic	1	43613594	43622067	8474	1	440585	uc009vwo.3	-77875	ENSG00000186973	CFAP144	cilia and flagella associated protein 144	NA	NA	NA
chr1	44501312	44503191	1880	*	Distal Intergenic	1	44466439	44497164	30726	2	6536	uc010okp.2	-4148	ENSG00000196517	SLC6A9	solute carrier family 6 member 9	uc009vxf.1;uc001clj.3;uc009vxc.3;uc009vxe.2;uc010okm.2;uc001cll.4;uc001clm.4;uc009vxd.4;uc010okn.3;uc001cln.4;uc010oko.3;uc010okp.2;uc001clg.3;uc001clh.3;uc010okl.2;uc001cli.3	128209;149473;149473;6536;6536;6536;6536;6536;6536;6536;6536;6536;8704;8704;8704;8704	-10839;44032;43793;-19084;-4148;-18300;-18300;-18300;-18300;-4148;-4148;-4148;56438;56438;55704;55135
chr1	44756094	44757104	1011	*	Intron (uc010okv.2/79033, intron 4 of 6)	1	44686742	44818597	131856	2	79033	uc010okv.2	61493	ENSG00000117419	ERI3	ERI1 exoribonuclease family member 3	uc010okv.2;uc001clt.3;uc010okw.2	79033;79033;79033	0;0;0
chr1	45103335	45104437	1103	*	Intron (uc001clv.1/55182, intron 8 of 14)	1	45098015	45117395	19381	1	55182	uc001cma.1	5320	ENSG00000187147	RNF220	ring finger protein 220	uc001cmf.2;uc001clv.1;uc001clw.1;uc010okx.1;uc010oky.1;uc010okz.2;uc001clx.2;uc001cma.1;uc001cmc.3;uc001cmd.3;uc009vxh.1;uc010ola.1	339541;55182;55182;55182;55182;55182;55182;55182;79639;79639;79639;79639	-35957;0;0;0;0;0;0;0;35662;35662;35313;21530
chr1	45476810	45478919	2110	*	Promoter (<=1kb)	1	45477805	45479663	1859	1	7389	uc010oli.2	0	ENSG00000126088	UROD	uroporphyrinogen decarboxylase	uc001cnd.2;uc010oli.2;uc031pmi.1;uc031pmj.1;uc001cna.2;uc001cnb.2;uc010olj.1;uc001cmx.4;uc001cmy.4;uc009vxk.3;uc010olh.2;uc001cmt.3;uc001cmu.3;uc001cmw.4	57643;7389;7389;7389;7389;7389;7389;79654;79654;79654;79654;8891;8891;8891	193331;0;0;0;0;0;0;-5550;-2587;0;0;-24416;-24416;-24416
chr1	45476810	45478919	2110	*	Promoter (<=1kb)	1	45477805	45479663	1859	1	7389	uc010oli.2	0	ENSG00000126088	UROD	uroporphyrinogen decarboxylase	uc001cnd.2;uc010oli.2;uc031pmi.1;uc031pmj.1;uc001cna.2;uc001cnb.2;uc010olj.1;uc001cmx.4;uc001cmy.4;uc009vxk.3;uc010olh.2;uc001cmt.3;uc001cmu.3;uc001cmw.4	57643;7389;7389;7389;7389;7389;7389;79654;79654;79654;79654;8891;8891;8891	193331;0;0;0;0;0;0;-5550;-2587;0;0;-24416;-24416;-24416
chr1	46987868	46988682	815	*	Distal Intergenic	1	46972668	46979886	7219	1	127343	uc001cpx.3	15200	ENSG00000197587	DMBX1	diencephalon/mesencephalon homeobox 1	uc021onb.1;uc001cpw.3;uc001cpx.3;uc001cpy.2;uc009vyh.1;uc001cqb.4;uc001cqc.4;uc009vyi.4;uc010omd.3;uc010ome.3;uc009vyj.3;uc001cqd.2	100507423;127343;127343;148930;148930;8569;8569;8569;8569;8569;8569;8569	-15686;15200;15200;26996;28205;81284;81284;81284;81284;81284;81284;81284
chr1	47645905	47647896	1992	*	Promoter (<=1kb)	1	47644922	47646011	1090	1	100874253	uc031pmn.1	983	ENSG00000224805	LINC00853	long intergenic non-protein coding RNA 853	uc031pmn.1;uc001cqw.3;uc009vyo.3;uc009vyp.3;uc001cqv.1;uc001crb.1;uc009vyq.2;uc001cqx.2;uc001cqy.2;uc001cqz.1;uc001cra.1	100874253;10158;284541;284541;284541;6491;6886;6886;6886;6886;6886	0;7875;42798;42798;42798;0;41874;47547;0;0;0
chr1	47697258	47698574	1317	*	Promoter (<=1kb)	1	47681963	47697387	15425	2	6886	uc001cqy.2	0	ENSG00000162367	TAL1	TAL bHLH transcription factor 1, erythroid differentiation factor	uc001cqw.3;uc001crb.1;uc010omn.1;uc010omo.1;uc001crc.1;uc001crd.1;uc001cre.1;uc001crf.1;uc001crg.1;uc009vyq.2;uc001cqx.2;uc001cqy.2;uc001cqz.1;uc001cra.1	10158;6491;6491;6491;6491;6491;6491;6491;6491;6886;6886;6886;6886;6886	-41487;0;80254;80254;81245;81245;81245;51171;81245;-7488;-1815;0;0;0
chr1	51086406	51086870	465	*	Intron (uc009vyw.1/11124, intron 7 of 15)	1	50906935	51078170	171236	2	11124	uc010onc.1	-8236	ENSG00000185104	FAF1	Fas associated factor 1	uc010onc.1;uc009vyw.1;uc001cse.1	11124;11124;11124	-8236;0;0
chr1	51985746	51986848	1103	*	Promoter (<=1kb)	1	51819935	51984995	165061	2	2060	uc009vyz.1	-751	ENSG00000085832	EPS15	epidermal growth factor receptor pathway substrate 15	uc001csq.1;uc009vyz.1	2060;2060	-751;-751
chr1	54837059	54837986	928	*	Intron (uc001cxe.4/23648, intron 4 of 17)	1	54691104	54872068	180965	2	23648	uc001cxe.4	34082	ENSG00000157216	SSBP3	single stranded DNA binding protein 3	uc001cxe.4;uc001cxf.4;uc001cxg.4	23648;23648;23648	0;0;0
chr1	54861745	54863456	1712	*	Intron (uc001cxe.4/23648, intron 4 of 17)	1	54691104	54872068	180965	2	23648	uc001cxe.4	8612	ENSG00000157216	SSBP3	single stranded DNA binding protein 3	uc001cxe.4;uc001cxf.4;uc001cxg.4	23648;23648;23648	0;0;0
chr1	59364494	59365451	958	*	3' UTR	1	59250823	59365384	114562	1	100131060	uc010oop.1	113671	NA	JUN-DT	JUN divergent transcript	uc001czf.2;uc010oop.1	100131060;100131060	0;0
chr1	61581644	61582650	1007	*	Intron (uc001czy.3/4774, intron 2 of 10)	1	61547980	61928460	380481	1	4774	uc001czw.3	33664	ENSG00000162599	NFIA	nuclear factor I A	uc001czy.3;uc010oos.2;uc001czv.3;uc001czw.3	4774;4774;4774;4774	0;0;0;0
chr1	68199124	68200393	1270	*	Intron (uc001dea.2/55970, intron 2 of 3)	1	68150860	68154021	3162	1	1647	uc009wbd.2	48264	ENSG00000116717	GADD45A	growth arrest and DNA damage inducible alpha	uc001ddz.2;uc009wbb.2;uc009wbc.2;uc009wbd.2;uc001dea.2	1647;1647;1647;1647;55970	48264;48264;48264;48264;0
chr1	70005456	70006401	946	*	Distal Intergenic	1	70032868	70340687	307820	1	57554	uc001deo.1	-26467	ENSG00000033122	LRRC7	leucine rich repeat containing 7	uc001deo.1	57554	-26467
chr1	71217098	71218134	1037	*	Intron (uc001dff.3/uc001dff.3, intron 5 of 6)	1	71512189	71532865	20677	1	100132618	uc001dfr.3	-294055	NA	ZRANB2-AS1	ZRANB2 antisense RNA 1	NA	NA	NA
chr1	90011015	90012060	1046	*	Intron (uc001dnh.3/23507, intron 1 of 7)	1	90024270	90063420	39151	1	23507	uc001dnj.3	-12210	ENSG00000197147	LRRC8B	leucine rich repeat containing 8 VRAC subunit B	uc001dnh.3;uc001dni.3;uc001dnj.3	23507;23507;23507	0;0;-12210
chr1	94129498	94130866	1369	*	Intron (uc001dpz.4/8412, intron 2 of 11)	1	94027343	94146926	119584	2	8412	uc001dpz.4	16060	ENSG00000137936	BCAR3	BCAR3 adaptor protein, NSP family member	uc001dpy.4;uc001dpz.4;uc001dqa.4;uc001dqb.4	8412;8412;8412;8412	-49796;0;0;0
chr1	94489388	94490517	1130	*	Exon (uc001dqh.3/24, exon 31 of 50)	1	94475933	94484228	8296	2	24	uc009wdp.1	-5160	ENSG00000198691	ABCA4	ATP binding cassette subfamily A member 4	uc001dqh.3;uc001dqi.1;uc009wdp.1;uc010otn.1	24;24;24;24	0;-12903;-5160;96188
chr1	109076059	109076954	896	*	Distal Intergenic	1	109102971	109181949	78979	1	284611	uc010ouy.2	-26017	ENSG00000162636	EEIG2	EEIG family member 2	uc010ouy.2	284611	-26017
chr1	109676803	109677685	883	*	Intron (uc009wex.2/57535, intron 1 of 19)	1	109656585	109749403	92819	1	57535	uc021orb.1	20218	ENSG00000116299	ELAPOR1	endosome-lysosome associated apoptosis and autophagy regulator 1	uc001dwp.4;uc009wev.3;uc009wew.3;uc001dwn.3;uc009weu.3;uc009wex.2;uc009wey.3;uc010ovg.3;uc021orb.1;uc001dwo.1	127003;127003;127003;56900;56900;57535;57535;57535;57535;677766	-21434;-21434;-20324;43400;43400;0;0;0;0;33988
chr1	110309520	110310037	518	*	Distal Intergenic	1	110295308	110306644	11337	2	79574	uc009wfo.2	-2876	ENSG00000198758	EPS8L3	EPS8 signaling adaptor L3	uc001dyo.2;uc001dyp.2;uc010ovv.2;uc010ovu.1;uc001dyn.3;uc001dyq.2;uc001dyr.2;uc001dys.2;uc009wfm.2;uc009wfn.2;uc009wfo.2	2947;2947;2947;2949;2949;79574;79574;79574;79574;79574;79574	-25860;-25860;-26387;54656;54656;-2876;-2876;-2876;-2876;-2876;-2876
chr1	110360782	110361559	778	*	Distal Intergenic	1	110295308	110306644	11337	2	79574	uc009wfo.2	-54138	ENSG00000198758	EPS8L3	EPS8 signaling adaptor L3	NA	NA	NA
chr1	113435824	113437246	1423	*	Distal Intergenic	1	113465972	113467295	1324	1	246182	uc001eda.1	-28726	NA	AKR7A2P1	AKR7A2 pseudogene 1	uc001eda.1;uc001ecx.3;uc001ecy.3;uc001ecz.3	246182;6566;6566;6566	-28726;61439;61729;61439
chr1	114922297	114923215	919	*	Distal Intergenic	1	114946948	114949722	2775	2	51592	uc001eey.1	26507	ENSG00000197323	TRIM33	tripartite motif containing 33	uc010owr.2;uc010ows.2;uc001eew.3;uc001eex.3;uc001eey.1	51592;51592;51592;51592;51592	47301;82963;130566;130566;26507
chr1	116951706	116952387	682	*	Intron (uc009whb.2/84852, intron 1 of 2)	1	116935487	116961244	25758	2	84852	uc009whb.2	8857	ENSG00000203865	ATP1A1-AS1	ATP1A1 antisense RNA 1	uc010owv.1;uc001egd.2;uc001ege.3;uc010oww.2;uc010owx.2;uc009whb.2;uc001egg.3;uc001egi.3;uc001egj.3;uc001egk.3	476;476;476;476;476;84852;84852;84852;84852;84852	36702;35911;35911;35217;25714;0;0;0;0;0
chr1	116958230	116959093	864	*	Intron (uc009whb.2/84852, intron 1 of 2)	1	116935487	116961244	25758	2	84852	uc009whb.2	2151	ENSG00000203865	ATP1A1-AS1	ATP1A1 antisense RNA 1	uc010owv.1;uc001egd.2;uc001ege.3;uc010oww.2;uc010owx.2;uc009whb.2;uc001egg.3;uc001egi.3;uc001egj.3;uc001egk.3	476;476;476;476;476;84852;84852;84852;84852;84852	43226;42435;42435;41741;32238;0;0;0;0;0
chr1	117046383	117047413	1031	*	Distal Intergenic	1	117061853	117087226	25374	2	965	uc001ego.1	39813	ENSG00000116815	CD58	CD58 molecule	uc001egm.3;uc001egn.3;uc010owy.2;uc001ego.1;uc001egp.4	965;965;965;965;965	66302;66302;66302;39813;66302
chr1	145009311	145010027	717	*	Intron (uc021ott.2/100288142, intron 53 of 131)	1	144951761	144997111	45351	2	9659	uc021ouj.1	-12200	ENSG00000178104	PDE4DIP	phosphodiesterase 4D interacting protein	uc021ott.2;uc021ots.1;uc010oye.3;uc031pnx.1;uc001elk.2;uc001ell.2;uc001elm.4;uc001eln.4;uc001elo.3;uc001elw.4;uc021ouh.1;uc001elx.4;uc001emc.2;uc001emd.2;uc001emg.2;uc021oui.1;uc021ouj.1;uc001emh.3	100288142;100288142;400818;400818;653513;653513;653513;653513;9659;9659;9659;9659;9659;9659;9659;9659;9659;9659	0;0;0;0;-14278;-14229;0;0;0;-14278;-14278;0;-14278;-14278;-14278;-14229;-12200;0
chr1	145029907	145030537	631	*	Intron (uc021ott.2/100288142, intron 53 of 131)	1	144676437	145039992	363556	2	653513	uc001elm.4	9455	NA	LOC653513	phosphodiesterase 4D interacting protein-like	uc021ott.2;uc021ots.1;uc010oye.3;uc031pnx.1;uc001elk.2;uc001ell.2;uc001elm.4;uc001eln.4;uc001elo.3;uc001elw.4;uc021ouh.1;uc001elx.4;uc001emc.2;uc001emd.2;uc001emg.2;uc021oui.1;uc021ouj.1;uc001emh.3;uc001emk.4	100288142;100288142;400818;400818;653513;653513;653513;653513;9659;9659;9659;9659;9659;9659;9659;9659;9659;9659;9659	0;0;0;0;-34874;-34825;0;0;0;-34874;-34874;0;-34874;-34874;-34874;-34825;-32796;0;45649
chr1	147769796	147770651	856	*	Intron (uc001eqe.3/728841, intron 12 of 13)	1	147806603	147806678	76	2	100847044	uc031pom.1	36027	ENSG00000283676	MIR5087	microRNA 5087	uc031pom.1;uc001eqe.3;uc001eqf.4;uc001eqg.3	100847044;728841;728841;728841	36027;0;0;0
chr1	151342542	151343481	940	*	Promoter (1-2kb)	1	151336778	151345210	8433	2	8991	uc001exx.4	1729	ENSG00000143416	SELENBP1	selenium binding protein 1	uc021oyq.1;uc001eyd.2;uc001eyf.2;uc009wmv.2;uc010pdb.2;uc010pdc.2;uc010pdd.2;uc001exr.3;uc001exs.3;uc001ext.3;uc001exu.3;uc010pcw.2;uc010pda.2;uc001eyc.1;uc001exv.1;uc001exw.1;uc010pcx.1;uc001exx.4;uc001eya.4;uc010pcy.3;uc010pcz.3	23126;23126;23126;23126;23126;23126;23126;5298;5298;5298;5298;5298;5692;5692;5993;5993;5993;8991;8991;8991;8991	71200;88460;88460;88460;88460;88460;88460;-42351;-42351;-42351;-42351;-42351;-28560;-28560;-22773;-22773;-22773;0;0;0;0
chr1	153031227	153032517	1291	*	Promoter (1-2kb)	1	153028596	153029988	1393	2	6700	uc001fbd.3	-1239	ENSG00000241794	SPRR2A	small proline rich protein 2A	uc001fba.3;uc001fbd.3;uc001fbf.3;uc001fbg.3;uc001fbb.2;uc001fbh.3	6699;6700;6700;6701;6703;6704	27548;-1239;0;11567;-17633;34484
chr1	153315935	153317032	1098	*	Intron (uc001fbo.3/57115, intron 4 of 8)	1	153302597	153321022	18426	2	57115	uc001fbo.3	3990	ENSG00000163218	PGLYRP4	peptidoglycan recognition protein 4	uc001fbn.1;uc001fbo.3;uc001fbp.3;uc001fbs.3;uc001fbq.3;uc001fbr.1	114771;57115;57115;6279;6280;6283	-32741;0;0;46632;-13298;31043
chr1	154129949	154130749	801	*	3' UTR	1	153965168	154127592	162425	2	91181	uc010peh.2	-2357	ENSG00000143552	NUP210L	nucleoporin 210 like	uc021pac.1;uc001feg.2;uc001feh.2;uc001fei.2;uc009wos.1;uc001fee.2;uc001fdx.1;uc031ppm.1;uc010pei.1;uc001fdy.1;uc001fdz.1;uc001fea.1;uc001feb.1;uc001fed.2;uc010pej.2;uc031ppn.1;uc031ppo.1;uc001fec.2;uc031ppp.1;uc009woq.3;uc001fdw.3;uc010peh.2	100126346;25912;25912;25912;25912;388701;7170;7170;7170;7170;7170;7170;7170;7170;7170;7170;7170;7170;7170;91181;91181;91181	35470;62524;62524;62524;62524;48092;0;0;0;0;0;0;0;0;0;0;0;33862;33862;-21501;-2357;-2357
chr1	154326651	154327554	904	*	Distal Intergenic	1	154301275	154310020	8746	1	57198	uc001fey.1	25376	ENSG00000143515	ATP8B2	ATPase phospholipid transporting 8B2	uc001few.3;uc001fex.3;uc001fey.1;uc001feu.3	57198;57198;57198;89872	28615;26375;25376;33059
chr1	155583540	155584018	479	*	3' UTR	1	155580411	155584758	4348	1	55154	uc001flc.4	3129	ENSG00000125459	MSTO1	misato mitochondrial distribution and morphology regulator 1	uc001fkw.4;uc001fkx.4;uc001fky.4;uc001fla.4;uc001flb.4;uc001fld.5;uc009wqs.4;uc010pgf.3;uc031ppy.1;uc001flc.4;uc010pgg.2;uc010pgh.2;uc001flh.3;uc009wqt.3;uc010pgi.2;uc001fli.3;uc001flj.3;uc001flk.3;uc001fll.3;uc001flm.3;uc009wqu.3;uc009wqv.3;uc009wqw.3;uc001fln.3;uc001flo.3;uc001flp.3;uc010pgj.2;uc021paz.1;uc009wqx.3;uc010pge.2	55154;55154;55154;55154;55154;55154;55154;55154;55154;55154;55249;55249;55249;55249;55249;55249;55249;55249;55249;55249;55249;55249;55249;55249;55249;55249;55249;55249;55249;645676	0;0;0;0;0;0;0;0;0;0;62519;65602;74429;74429;74429;74550;74550;74550;74550;74550;74550;74550;74550;74805;74805;74805;74805;171147;74429;51768
chr1	156073299	156073846	548	*	Intron (uc001fnf.1/4000, intron 3 of 12)	1	156084461	156108548	24088	1	4000	uc001fng.2	-10615	ENSG00000160789	LMNA	lamin A/C	uc001fnb.3;uc010pgy.1;uc001fnf.1;uc001fng.2;uc001fnh.3;uc001fni.3;uc009wro.2;uc001fnj.3;uc010pgz.2;uc001fnk.3;uc009wrp.3;uc010pha.1;uc001fna.3;uc010pgx.2;uc001fnc.3;uc001fnl.3;uc001fnm.3;uc001fnn.3;uc009wrq.3;uc001fnd.4	28956;28956;4000;4000;4000;4000;4000;4000;4000;4000;4000;4000;56893;56893;57111;64218;64218;64218;64218;92312	48782;48782;0;0;0;0;0;0;0;0;-31058;-31678;-49783;-49783;42333;-45889;-49476;-49476;-49476;-21510
chr1	156096059	156096624	566	*	Promoter (<=1kb)	1	156096346	156109880	13535	1	4000	uc001fnk.3	0	ENSG00000160789	LMNA	lamin A/C	uc001fnf.1;uc001fng.2;uc001fnh.3;uc001fni.3;uc009wro.2;uc001fnj.3;uc010pgz.2;uc001fnk.3;uc009wrp.3;uc010pha.1;uc001fnl.3;uc001fnm.3;uc001fnn.3;uc009wrq.3;uc001fno.3;uc001fnd.4	4000;4000;4000;4000;4000;4000;4000;4000;4000;4000;64218;64218;64218;64218;64218;92312	0;0;0;0;0;0;0;0;-8280;-8900;-23111;-26698;-26698;-26698;-27538;-44270
chr1	159879959	159880664	706	*	Distal Intergenic	1	159846346	159869906	23561	2	25790	uc009wtc.1	-10053	ENSG00000213085	CFAP45	cilia and flagella associated protein 45	uc009wtb.3;uc001fui.3;uc001fuj.3;uc001fuk.3;uc009wtc.1;uc001fuh.3;uc001fup.2;uc001fuq.2;uc001fur.2;uc031pqt.1;uc031pqu.1;uc001fun.2;uc010piy.2;uc001fus.3;uc001fut.3;uc009wtd.3	25790;25790;25790;25790;25790;391123;57549;57549;57549;8407;8407;8407;8407;89886;89886;89886	-16864;-10053;-10053;-10053;-10053;-47512;21595;34722;34722;12843;13677;14668;14668;43380;43380;43380
chr1	160509418	160510743	1326	*	Distal Intergenic	1	160460431	160493052	32622	2	114836	uc009wtm.2	-16366	ENSG00000162739	SLAMF6	SLAM family member 6	uc001fwd.2;uc001fwe.2;uc010pjh.2;uc010pji.2;uc010pjj.2;uc009wtm.2;uc001fwf.4;uc001fwg.4;uc001fwh.4;uc001fwi.4;uc009wtn.3;uc001fwj.3;uc001fwk.3	114836;114836;114836;114836;114836;114836;8832;8832;8832;8832;8832;8832;8832	-16366;-16366;-16366;-16366;-16366;-16366;38563;38563;38563;38563;38563;38563;38563
chr1	160979151	160979940	790	*	Intron (uc010pjv.2/50848, intron 1 of 8)	1	160965001	160990902	25902	2	50848	uc010pjv.2	10962	ENSG00000158769	F11R	F11 receptor	uc001fxh.4;uc009wtw.3;uc010pjx.2;uc001fxk.3;uc001fxl.3;uc001fxm.3;uc009wtx.3;uc001fxn.1;uc010pjv.2;uc009wtt.3;uc001fxf.4;uc010pjw.2;uc031pqv.1;uc001fxi.4;uc001fxj.4	100131187;100131187;100131187;257106;257106;257106;257106;257106;50848;50848;50848;50848;7391;7391;7391	28834;28834;28834;59820;59820;59820;59820;59820;0;0;0;0;34787;35829;35829
chr1	161509635	161510393	759	*	Exon (uc021pdg.1/uc021pdg.1, exon 1 of 1)	1	161511551	161519818	8268	2	2214	uc001gar.3	9425	ENSG00000203747	FCGR3A	Fc gamma receptor IIIa	uc001gam.3;uc001gan.3;uc021pcz.2;uc021pda.2;uc001gar.3;uc001gas.3;uc001gat.4;uc009wuh.3;uc009wui.3;uc001gaq.3;uc009wuj.2;uc009wuk.2;uc021pdh.1;uc021pdi.2	2212;2212;2212;2212;2214;2214;2214;2214;2214;3310;9103;9103;9103;9103	34430;34430;34430;34430;9425;9425;10020;10020;10020;15599;-40736;-40736;-40736;-40736
chr1	167596694	167597913	1220	*	Promoter (1-2kb)	1	167599474	167675486	76013	1	92241	uc001gem.3	-1561	ENSG00000198771	RCSD1	RCSD domain containing 1	uc001gem.3;uc010pli.2	92241;92241	-1561;-1561
chr1	178994588	178996572	1985	*	Promoter (<=1kb)	1	178995074	179045702	50629	1	9917	uc001gmc.3	0	ENSG00000116199	FAM20B	FAM20B glycosaminoglycan xylosylkinase	uc001gmc.3	9917	0
chr1	182268964	182269717	754	*	Distal Intergenic	1	182350839	182354717	3879	2	2752	uc010pnt.2	85000	ENSG00000135821	GLUL	glutamate-ammonia ligase	NA	NA	NA
chr1	185253387	185254589	1203	*	Intron (uc001grg.4/54823, intron 18 of 18)	1	185265522	185270846	5325	2	10625	uc001gri.3	16257	ENSG00000116679	IVNS1ABP	influenza virus NS1A binding protein	uc001grn.4;uc001gri.3;uc001grj.3;uc009wyj.3;uc001grl.3;uc009wyk.3;uc001grm.3;uc001grg.4;uc001grh.4	100288079;10625;10625;10625;10625;10625;10625;54823;54823	49582;16257;21043;25865;31872;31872;16257;0;0
chr1	198048343	198049372	1030	*	Distal Intergenic	1	198126108	198291548	165441	1	140609	uc001gun.4	-76736	ENSG00000151414	NEK7	NIMA related kinase 7	NA	NA	NA
chr1	202044745	202046610	1866	*	Distal Intergenic	1	202092029	202098634	6606	1	9283	uc001gxj.3	-45419	ENSG00000170075	GPR37L1	G protein-coupled receptor 37 like 1	uc001gxj.3	9283	-45419
chr1	203274980	203276043	1064	*	Promoter (<=1kb)	1	203274664	203278729	4066	1	7832	uc001gzq.3	316	ENSG00000159388	BTG2	BTG anti-proliferation factor 2	uc001gzm.1;uc001gzr.3;uc001gzp.2;uc009xao.2;uc001gzq.3	1118;2331;730227;730227;7832	-33043;44246;-527;-527;0
chr1	203650349	203652170	1822	*	Promoter (<=1kb)	1	203651870	203702757	50888	1	493	uc009xaq.3	0	ENSG00000058668	ATP2B4	ATPase plasma membrane Ca2+ transporting 4	uc001gzv.3;uc001gzw.3;uc009xaq.3;uc001gzx.3;uc009xar.3;uc001gzy.1;uc031prr.1	493;493;493;493;493;677843;84719	0;0;0;-39436;-39436;-46539;-47535
chr1	205125898	205127305	1408	*	Exon (uc001hbw.3/25778, exon 10 of 13)	1	205129134	205143643	14510	2	25778	uc001hby.1	16338	ENSG00000133059	DSTYK	dual serine/threonine and tyrosine protein kinase	uc001hbw.3;uc001hbx.3;uc001hby.1;uc010prd.2;uc001hbu.2;uc001hbv.2;uc010pre.2	25778;25778;25778;5929;5929;5929;5929	0;0;16338;-40482;-34748;-34748;-34748
chr1	207197297	207198867	1571	*	5' UTR	1	207191866	207206101	14236	2	79098	uc001hfd.2	7234	ENSG00000182795	C1orf116	chromosome 1 open reading frame 116	uc010psc.2;uc001hfg.3;uc001hfh.3;uc009xcc.3;uc010psd.2;uc001hfe.1;uc001hff.1;uc001hfd.2;uc009xcb.1	5208;5208;5208;5208;5208;55432;55432;79098;79098	-8894;-27753;-27753;-29179;-39482;25555;27458;0;0
chr1	207536385	207537327	943	*	Distal Intergenic	1	207497904	207511004	13101	1	1604	uc031prz.1	38481	ENSG00000196352	CD55	CD55 molecule (Cromer blood group)	uc001hfq.4;uc001hfr.4;uc009xce.3;uc009xcf.3;uc010psf.2;uc031prz.1	1604;1604;1604;1604;1604;1604	41568;41568;41568;41568;41568;38481
chr1	207693230	207694573	1344	*	Intron (uc009xcj.1/1378, intron 4 of 12)	1	207669473	207815110	145638	1	1378	uc021pij.1	23757	ENSG00000203710	CR1	complement C3b/C4b receptor 1 (Knops blood group)	uc010psg.1;uc009xcj.1;uc009xck.1;uc009xcl.1;uc001hfx.3;uc001hfy.3;uc021pij.1;uc001hfv.3;uc001hfw.3;uc009xch.3;uc009xci.1	1378;1378;1378;1378;1378;1378;1378;1380;1380;1380;1380	23757;0;0;0;0;0;0;65585;65585;65585;48888
chr1	208045873	208047699	1827	*	Distal Intergenic	1	208059883	208063837	3955	2	947	uc001hgv.1	16138	ENSG00000174059	CD34	CD34 molecule	uc010psi.2;uc001hgv.1;uc001hgw.1;uc001hgx.1;uc010psj.1	148696;947;947;947;947	54149;16138;36984;36984;36984
chr1	208137377	208138079	703	*	Distal Intergenic	1	208059883	208084683	24801	2	947	uc010psj.1	-52694	ENSG00000174059	CD34	CD34 molecule	NA	NA	NA
chr1	209974777	209976236	1460	*	5' UTR	1	209958968	209979520	20553	2	3664	uc001hhq.2	3284	ENSG00000117595	IRF6	interferon regulatory factor 6	uc001hhp.1;uc001hhr.2;uc009xcu.2;uc001hhq.2;uc010psm.2;uc001hhm.2;uc001hhn.3;uc001hho.3;uc009xcr.3	148304;27042;27042;3664;3664;80342;80342;80342;80342	-16887;-25076;-25076;0;0;45383;45383;45383;42934
chr1	209974777	209976236	1460	*	5' UTR	1	209958968	209979520	20553	2	3664	uc001hhq.2	3284	ENSG00000117595	IRF6	interferon regulatory factor 6	uc001hhp.1;uc001hhr.2;uc009xcu.2;uc001hhq.2;uc010psm.2;uc001hhm.2;uc001hhn.3;uc001hho.3;uc009xcr.3	148304;27042;27042;3664;3664;80342;80342;80342;80342	-16887;-25076;-25076;0;0;45383;45383;45383;42934
chr1	216886621	216888063	1443	*	5' UTR	1	216676588	216896814	220227	2	2104	uc001hkw.2	8751	ENSG00000196482	ESRRG	estrogen related receptor gamma	uc001hkw.2;uc001hkx.2;uc001hle.2;uc009xdo.2;uc021piz.1;uc001hky.1;uc009xdp.1;uc001hkz.2;uc010puc.2;uc001hla.2;uc001hlb.2;uc010pud.2;uc021pja.1;uc001hlc.1;uc001hld.1	2104;2104;2104;2104;2104;2104;2104;2104;2104;2104;2104;2104;2104;2104;2104	0;0;0;0;0;0;0;0;0;0;0;0;0;0;0
chr1	220079904	220081293	1390	*	Intron (uc021pjd.1/26828, intron 1 of 1)	1	220087606	220092372	4767	2	55532	uc001hlv.3	11079	ENSG00000196660	SLC30A10	solute carrier family 30 member 10	uc021pjd.1;uc001hlu.1;uc001hlv.3;uc001hlw.3;uc001hlx.4	26828;55532;55532;55532;55532	0;0;11079;20700;20700
chr1	224057844	224059070	1227	*	Distal Intergenic	1	223967595	224033674	66080	2	7159	uc010pvb.2	-24170	ENSG00000143514	TP53BP2	tumor protein p53 binding protein 2	uc001hod.3;uc010pvb.2	7159;7159	-24170;-24170
chr1	224690930	224691768	839	*	Distal Intergenic	1	224616999	224622001	5003	2	80232	uc021pjt.1	-68929	ENSG00000162923	WDR26	WD repeat domain 26	NA	NA	NA
chr1	226115888	226116751	864	*	Distal Intergenic	1	226107577	226112040	4464	2	29920	uc031psk.1	-3848	ENSG00000143811	PYCR2	pyrroline-5-carboxylate reductase 2	uc001hpo.3;uc010pvj.3;uc009xej.2;uc001hpq.4;uc031psk.1;uc001hps.1;uc001hpt.2;uc009xek.2;uc010pvk.2;uc001hpm.2	10637;10637;10637;29920;29920;29920;7044;7044;7044;9725	-39042;-3848;-39042;-3848;-3848;-5440;12332;12332;12332;-45468
chr1	226186800	226187955	1156	*	Promoter (<=1kb)	1	226170403	226187066	16664	2	163859	uc001hpu.4	0	ENSG00000143751	SDE2	SDE2 telomere maintenance homolog	uc001hpu.4	163859	0
chr1	226190469	226191313	845	*	Distal Intergenic	1	226170403	226187066	16664	2	163859	uc001hpu.4	-3403	ENSG00000143751	SDE2	SDE2 telomere maintenance homolog	uc001hpu.4	163859	0
chr1	227583988	227585311	1324	*	Intron (uc001hqv.3/uc001hqv.3, intron 2 of 3)	1	227177566	227505826	328261	2	8476	uc010pvs.2	-78162	ENSG00000143776	CDC42BPA	CDC42 binding protein kinase alpha	NA	NA	NA
chr1	228700675	228702557	1883	*	Distal Intergenic	1	228675068	228683889	8822	1	149603	uc001htb.3	25607	ENSG00000168159	RNF187	ring finger protein 187	uc001htb.3	149603	25607
chr1	228700675	228702557	1883	*	Distal Intergenic	1	228675068	228683889	8822	1	149603	uc001htb.3	25607	ENSG00000168159	RNF187	ring finger protein 187	uc001htb.3	149603	25607
chr1	229690362	229691577	1216	*	Intron (uc001htp.4/23456, intron 1 of 12)	1	229652329	229694442	42114	2	23456	uc001htp.4	2865	ENSG00000135776	ABCB10	ATP binding cassette subfamily B member 10	uc001htp.4;uc001htq.3;uc001htr.3;uc001htn.3	23456;27097;27097;55746	0;70217;70217;-46274
chr1	230262596	230263415	820	*	Intron (uc010pvy.1/2590, intron 1 of 15)	1	230202956	230417875	214920	1	2590	uc010pwa.1	59640	ENSG00000143641	GALNT2	polypeptide N-acetylgalactosaminyltransferase 2	uc010pvy.1;uc010pvz.1;uc010pwa.1	2590;2590;2590	0;0;0
chr1	230278859	230280073	1215	*	Intron (uc010pvy.1/2590, intron 1 of 15)	1	230202956	230417875	214920	1	2590	uc010pwa.1	75903	ENSG00000143641	GALNT2	polypeptide N-acetylgalactosaminyltransferase 2	uc010pvy.1;uc010pvz.1;uc010pwa.1	2590;2590;2590	0;0;0
chr1	231181791	231182983	1193	*	Distal Intergenic	1	231154704	231175995	21292	2	375061	uc001hui.2	-5796	ENSG00000182118	FAM89A	family with sequence similarity 89 member A	uc021pkk.1;uc001hui.2;uc009xfl.1;uc001huh.3	100302132;375061;64801;64801	-26121;-5796;66968;66968
chr1	234626521	234627479	959	*	Distal Intergenic	1	234527059	234614849	87791	2	6894	uc001hwd.3	-11672	ENSG00000059588	TARBP1	TAR (HIV-1) RNA binding protein 1	uc001hwe.3;uc001hwd.3	100506795;6894	40046;-11672
chr1	234693819	234695088	1270	*	Distal Intergenic	1	234663637	234667525	3889	2	100506795	uc001hwe.3	-26294	ENSG00000231768	LINC01354	long intergenic non-protein coding RNA 1354	uc001hwe.3;uc009xfw.3;uc001hwf.3;uc001hwg.3	100506795;359948;359948;359948	-26294;48772;50183;50183
chr1	234859333	234860540	1208	*	Promoter (<=1kb)	1	234859789	234867390	7602	1	100506810	uc001hwj.2	0	ENSG00000227630	LINC01132	long intergenic non-protein coding RNA 1132	uc001hwj.2	100506810	0
chr1	235011617	235012853	1237	*	Distal Intergenic	1	234859789	234867390	7602	1	100506810	uc001hwj.2	151828	ENSG00000227630	LINC01132	long intergenic non-protein coding RNA 1132	NA	NA	NA
chr1	249176202	249177211	1010	*	Distal Intergenic	1	249144203	249153315	9113	2	55657	uc001iff.2	-22887	ENSG00000171163	ZNF692	zinc finger protein 692	uc001ifg.3;uc001ifh.3;uc009xhd.3;uc001iez.2;uc031pta.1;uc001ifb.2;uc010pzr.2;uc001ifc.2;uc001iff.2;uc001iex.3	267002;267002;267002;55657;55657;55657;55657;55657;55657;79894	-23231;-23231;-23231;-25968;-23938;-23290;-23077;-22887;-22887;43672
chr1	249231832	249233367	1536	*	Distal Intergenic	1	249200442	249213345	12904	1	267002	uc009xhd.3	31390	ENSG00000185220	PGBD2	piggyBac transposable element derived 2	uc001ifg.3;uc001ifh.3;uc009xhd.3	267002;267002;267002	31390;31390;31390
chr10	3845809	3846961	1153	*	Distal Intergenic	10	3822519	3827473	4955	2	1316	uc001ihb.2	-18336	ENSG00000067082	KLF6	KLF transcription factor 6	uc001iha.3;uc010qaj.2;uc010qak.2;uc010qal.2;uc001ihb.2	1316;1316;1316;1316;1316	-18336;-18336;-18336;-18336;-18336
chr10	9867011	9868008	998	*	Distal Intergenic	10	10826402	10836877	10476	2	207107	uc001ikf.1	968869	ENSG00000225383	SFTA1P	surfactant associated 1, lncRNA	NA	NA	NA
chr10	11220209	11221212	1004	*	Intron (uc010qbi.2/10659, intron 2 of 7)	10	11207449	11374605	167157	1	10659	uc010qbp.1	12760	ENSG00000048740	CELF2	CUGBP Elav-like family member 2	uc010qbi.2;uc010qbj.1;uc001iki.4;uc001ikk.2;uc001ikl.4;uc010qbk.1;uc010qbl.1;uc010qbm.1;uc001iko.4;uc001ikp.4;uc009xiw.1;uc010qbo.1;uc010qbp.1	10659;10659;10659;10659;10659;10659;10659;10659;10659;10659;10659;10659;10659	0;0;0;0;0;0;0;0;0;0;0;0;0
chr10	11654244	11654937	694	*	Promoter (<=1kb)	10	11606126	11653679	47554	2	9712	uc001iku.3	-565	ENSG00000148429	USP6NL	USP6 N-terminal like	uc001ikt.3;uc001iku.3	9712;9712	-565;-565
chr10	11940081	11941192	1112	*	Distal Intergenic	10	11891607	11936709	45103	2	219731	uc001iky.2	-3372	ENSG00000225778	PROSER2-AS1	PROSER2 antisense RNA 1	uc001iky.2;uc001ikx.3;uc001ila.3;uc001ilb.3;uc001ilc.3	219731;254427;26019;26019;26019	-3372;74684;136704;143648;143977
chr10	12104976	12106006	1031	*	Distal Intergenic	10	12110916	12165227	54312	1	55526	uc001ild.5	-4910	ENSG00000181192	DHTKD1	dehydrogenase E1 and transketolase domain containing 1	uc001ila.3;uc001ilb.3;uc001ilc.3;uc009xiz.2;uc001ild.5	26019;26019;26019;26019;55526	-27080;-20136;-19807;-20136;-4910
chr10	12250213	12251168	956	*	Intron (uc009xja.2/8872, intron 2 of 4)	10	12209573	12238143	28571	2	11164	uc001ilj.3	-12070	ENSG00000165609	NUDT5	nudix hydrolase 5	uc001ilj.3;uc001ile.2;uc010qbq.1;uc001ilf.4;uc001ilg.4;uc001ilh.4;uc009xja.2;uc001ill.3	11164;55176;55176;55176;55176;55176;8872;8872	-12070;78573;78573;78573;78573;78573;0;0
chr10	17467536	17468640	1105	*	Intron (uc001ipd.3/338596, intron 2 of 7)	10	17362676	17496254	133579	2	338596	uc001ipd.3	27614	ENSG00000148488	ST8SIA6	ST8 alpha-N-acetyl-neuraminide alpha-2,8-sialyltransferase 6	uc001ipe.3;uc001ipf.1;uc001ipd.3;uc010qce.2	100128098;100128098;338596;338596	38601;38601;0;0
chr10	17469674	17471221	1548	*	Intron (uc001ipd.3/338596, intron 2 of 7)	10	17362676	17496254	133579	2	338596	uc001ipd.3	25033	ENSG00000148488	ST8SIA6	ST8 alpha-N-acetyl-neuraminide alpha-2,8-sialyltransferase 6	uc001ipe.3;uc001ipf.1;uc001ipd.3;uc010qce.2	100128098;100128098;338596;338596	40739;40739;0;0
chr10	17469674	17471221	1548	*	Intron (uc001ipd.3/338596, intron 2 of 7)	10	17362676	17496254	133579	2	338596	uc001ipd.3	25033	ENSG00000148488	ST8SIA6	ST8 alpha-N-acetyl-neuraminide alpha-2,8-sialyltransferase 6	uc001ipe.3;uc001ipf.1;uc001ipd.3;uc010qce.2	100128098;100128098;338596;338596	40739;40739;0;0
chr10	17704223	17705615	1393	*	Intron (uc001ipj.2/8027, intron 2 of 13)	10	17686124	17758821	72698	1	8027	uc010qcf.2	18099	ENSG00000136738	STAM	signal transducing adaptor molecule	uc001ipj.2;uc010qcf.2;uc009xjw.2;uc001ipg.3;uc001iph.1;uc001ipi.3	8027;8027;8027;9200;9200;9200	0;0;-31433;-44850;-44850;-44850
chr10	26637454	26638492	1039	*	Distal Intergenic	10	26727266	26790867	63602	1	54518	uc001isr.3	-88774	ENSG00000077420	APBB1IP	amyloid beta precursor protein binding family B member 1 interacting protein	uc001isp.2;uc001isq.2	2572;2572	132218;132218
chr10	26665792	26667150	1359	*	Distal Intergenic	10	26727266	26790867	63602	1	54518	uc001isr.3	-60116	ENSG00000077420	APBB1IP	amyloid beta precursor protein binding family B member 1 interacting protein	NA	NA	NA
chr10	35053330	35054290	961	*	Intron (uc010qej.2/56288, intron 1 of 24)	10	34398488	35104253	705766	2	56288	uc010qej.2	49963	ENSG00000148498	PARD3	par-3 family cell polarity regulator	uc010qej.2;uc010qek.2;uc010qel.2;uc010qem.2;uc010qen.2;uc010qeo.2;uc010qep.2;uc010qeq.2;uc001ixp.2;uc001ixq.2;uc001ixr.2;uc001ixu.2	56288;56288;56288;56288;56288;56288;56288;56288;56288;56288;56288;56288	0;0;0;0;0;0;0;0;0;0;0;0
chr10	43913278	43914108	831	*	Distal Intergenic	10	43881065	43904696	23632	2	3185	uc001jau.2	-8582	ENSG00000169813	HNRNPF	heterogeneous nuclear ribonucleoprotein F	uc009xmh.1;uc001jar.2;uc001jas.2;uc001jat.2;uc001jav.2;uc001jau.2;uc001jaq.1;uc010qfb.1	3185;3185;3185;3185;3185;3185;53828;642819	-20999;-20484;-9979;-8946;-8622;-8582;46186;-18466
chr10	45965682	45966927	1246	*	Intron (uc001jch.2/220972, intron 3 of 7)	10	45952817	45957652	4836	2	220972	uc001jcg.1	-8030	ENSG00000165406	MARCHF8	membrane associated ring-CH-type finger 8	uc001jcg.1;uc001jch.2;uc001jci.1;uc001jcj.1;uc001jck.1;uc001jce.4;uc009xmt.4;uc010qfg.3;uc021ppr.2	220972;220972;220972;220972;220972;240;240;240;240	-8030;0;0;0;0;96058;96058;96058;96058
chr10	47139544	47141044	1501	*	Intron (uc001jed.5/653145, intron 2 of 3)	10	47133295	47133836	542	2	728643	uc001jeg.3	-5708	ENSG00000213412	HNRNPA1P33	heterogeneous nuclear ribonucleoprotein A1 pseudogene 33	uc001jef.3;uc010qfw.2;uc001jed.5;uc001jeh.4;uc010qfr.3;uc010qfs.3;uc010qft.3;uc010qfu.1;uc010qfv.2;uc001jeg.3	643650;644054;653145;653145;653145;653145;653145;653145;653145;728643	0;40644;0;33099;33099;33099;33099;27686;33099;-5708
chr10	51593947	51594963	1017	*	Intron (uc001jin.3/uc001jin.3, intron 7 of 7)	10	51576285	51590734	14450	1	8031	uc009xoo.3	17662	ENSG00000266412	NCOA4	nuclear receptor coactivator 4	uc001jiu.4;uc010qhg.3;uc031pvb.1;uc031pvc.1;uc001jiq.3;uc001jir.3;uc001jis.4;uc009xon.3;uc010qhd.2;uc010qhe.2;uc010qhf.2;uc001jit.3;uc009xoo.3;uc001jih.3	100287932;100287932;100287932;100287932;4477;4477;8031;8031;8031;8031;8031;8031;8031;8505	0;0;0;0;44394;44394;28839;28839;28839;28839;28839;21583;17662;0
chr10	63524895	63526090	1196	*	3' UTR	10	63422719	63526091	103373	1	219621	uc010qik.2	102176	ENSG00000183346	CABCOCO1	ciliary associated calcium binding coiled-coil 1	uc010qik.2	219621	0
chr10	63539788	63540647	860	*	Distal Intergenic	10	63422719	63526091	103373	1	219621	uc010qik.2	117069	ENSG00000183346	CABCOCO1	ciliary associated calcium binding coiled-coil 1	uc010qik.2	219621	0
chr10	64578404	64579433	1030	*	Promoter (<=1kb)	10	64571756	64578419	6664	2	1959	uc010qio.2	0	ENSG00000122877	EGR2	early growth response 2	uc001jmi.3;uc010qim.2;uc010qin.2;uc010qio.2;uc009xph.3;uc001jmg.3	1959;1959;1959;1959;1959;84890	-2278;-2278;-2278;0;0;13888
chr10	71001623	71002304	682	*	Intron (uc001jpf.4/80201, intron 6 of 17)	10	70992759	71027315	34557	1	80201	uc010qje.2	8864	ENSG00000156510	HKDC1	hexokinase domain containing 1	uc009xqc.2;uc001jpg.4;uc001jph.4;uc001jpi.4;uc001jpj.4;uc001jpe.1;uc010qjd.1;uc001jpf.4;uc010qje.2;uc009xqb.3	3098;3098;3098;3098;3098;6832;6832;80201;80201;80201	0;0;0;0;0;61630;61630;0;0;-14779
chr10	71074768	71076194	1427	*	Promoter (<=1kb)	10	71075610	71161637	86028	1	3098	uc001jpk.4	0	ENSG00000156515	HK1	hexokinase 1	uc009xqc.2;uc001jpg.4;uc001jph.4;uc001jpi.4;uc001jpj.4;uc001jpk.4;uc009xqd.3;uc001jpl.4;uc001jpf.4;uc010qje.2;uc009xqb.3	3098;3098;3098;3098;3098;3098;3098;3098;80201;80201;80201	0;0;0;0;0;0;-2409;-2409;0;0;57685
chr10	73506157	73507323	1167	*	3' UTR	10	73471458	73497581	26124	2	414152	uc001jsb.2	-8576	ENSG00000214688	C10orf105	chromosome 10 open reading frame 105	uc001jsa.2;uc001jsb.2;uc001jry.3;uc001jrz.3;uc001jrx.4;uc001jsc.1;uc001jsg.4;uc001jsh.4;uc001jsi.4;uc001jsd.3;uc001jse.3	414152;414152;64072;64072;64072;64072;64072;64072;64072;64115;64115	-26579;-8576;349466;349466;0;33796;-48205;-48205;-49290;0;0
chr10	74056682	74057579	898	*	Distal Intergenic	10	74033677	74035797	2121	1	54541	uc001jsx.1	23005	ENSG00000168209	DDIT4	DNA damage inducible transcript 4	uc001jsx.1;uc001jsz.2;uc001jta.2;uc010qjv.1	54541;54788;54788;54788	23005;57328;57328;57328
chr10	74079359	74080990	1632	*	Distal Intergenic	10	74092588	74114907	22320	2	54788	uc001jsz.2	33917	ENSG00000148719	DNAJB12	DnaJ heat shock protein family (Hsp40) member B12	uc021pth.1;uc010qjw.2;uc010qjx.2;uc009xqo.2;uc001jtb.2;uc001jsx.1;uc001jsz.2;uc001jta.2;uc010qjv.1	100302155;10367;10367;10367;10367;54541;54788;54788;54788	255551;202754;202754;230109;304959;45682;33917;33917;33917
chr10	75716137	75716772	636	*	Distal Intergenic	10	75669727	75682535	12809	2	414236	uc001jvz.2	-33602	ENSG00000222047	C10orf55	chromosome 10 putative open reading frame 55	uc001jvz.2;uc001jwa.3;uc010qkw.2;uc010qkx.2;uc001jwb.3;uc001jwc.3;uc009xrq.1;uc009xrr.3;uc010qky.1;uc001jwd.3;uc001jwe.3;uc010qkz.2	414236;5328;5328;5328;5328;5328;5328;7414;7414;7414;7414;7414	-33602;45275;45275;45275;45219;45219;44854;-38179;-41100;-41100;-41100;-41100
chr10	76348922	76350048	1127	*	Exon (uc001jwi.3/132, exon 8 of 11)	10	76586171	76792380	206210	1	23522	uc001jwm.2	-236123	ENSG00000156650	KAT6B	lysine acetyltransferase 6B	uc001jwi.3;uc010qlb.2;uc001jwj.3;uc010qlc.2	132;132;132;132	0;0;0;0
chr10	80786893	80787948	1056	*	Intron (uc001jzx.3/283050, intron 4 of 7)	10	80703083	80827205	124123	2	283050	uc001jzx.3	39257	ENSG00000224596	ZMIZ1-AS1	ZMIZ1 antisense RNA 1	uc001jzx.3;uc001jzy.3;uc001jzz.3;uc001kab.1;uc001kaf.2	283050;283050;283050;283050;57178	0;0;0;0;0
chr10	80853326	80854037	712	*	Intron (uc001kaf.2/57178, intron 1 of 24)	10	80828792	81076285	247494	1	57178	uc001kaf.2	24534	ENSG00000108175	ZMIZ1	zinc finger MIZ-type containing 1	uc001jzx.3;uc001jzy.3;uc001jzz.3;uc001kab.1;uc001kaf.2;uc001kae.3	283050;283050;283050;283050;57178;57178	0;0;0;0;0;-45402
chr10	82256860	82258003	1144	*	Intron (uc001kci.4/81619, intron 2 of 7)	10	82297658	82406316	108659	1	387694	uc001kck.1	-39655	ENSG00000178217	SH2D4B	SH2 domain containing 4B	uc001kck.1;uc001kcl.1;uc001kci.4;uc001kcj.4;uc009xss.3	387694;387694;81619;81619;81619	-39655;-42572;0;0;0
chr10	94515666	94516901	1236	*	Distal Intergenic	10	94449681	94455408	5728	1	3087	uc001kid.3	65985	ENSG00000152804	HHEX	hematopoietically expressed homeobox	NA	NA	NA
chr10	97290882	97292427	1546	*	Intron (uc001kku.3/10580, intron 1 of 25)	10	97071530	97321171	249642	2	10580	uc001kku.3	28744	ENSG00000095637	SORBS1	sorbin and SH3 domain containing 1	uc001kkt.3;uc001kku.3;uc001kkv.3;uc001kkw.3;uc010qoe.2;uc010qof.1;uc001kkx.1	10580;10580;10580;10580;10580;10580;10580	-48454;0;0;0;0;0;0
chr10	99057313	99058171	859	*	Distal Intergenic	10	98981930	99052430	70501	2	84986	uc009xvk.3	-4883	ENSG00000213390	ARHGAP19	Rho GTPase activating protein 19	uc001knc.1;uc001kmy.3;uc001knd.1;uc001kna.4;uc001knb.3;uc009xvi.3;uc009xvj.3;uc009xvk.3	10023;100533184;23401;84986;84986;84986;84986;84986	-20851;-4883;36287;-26866;-4883;-4883;-4883;-4883
chr10	99548345	99549492	1148	*	Distal Intergenic	10	99526508	99531756	5249	2	6425	uc001kor.4	-16589	ENSG00000120057	SFRP5	secreted frizzled related protein 5	uc001kok.2;uc001kol.2;uc001kom.2;uc001koq.3;uc010qpa.2;uc010qpb.2;uc010qpc.2;uc010qpd.2;uc021pwq.1;uc001kor.4	118813;118813;118813;118813;118813;118813;118813;118813;118813;6425	51467;51467;51467;51467;51467;51467;51467;51467;50111;-16589
chr10	100220386	100221641	1256	*	3' UTR	10	100188903	100206704	17802	2	3257	uc001kpl.3	-13682	ENSG00000107521	HPS1	HPS1 biogenesis of lysosomal organelles complex 3 subunit 1	uc021pww.2;uc021pwv.1;uc010qpg.2;uc009xwb.3;uc010qph.1;uc001kpl.3;uc001kpn.2;uc001kpo.2;uc009xwc.2;uc009xwd.2;uc001kpb.3;uc001kpc.3;uc010qpe.2	100616482;3257;3257;3257;3257;3257;60495;60495;60495;60495;84795;84795;84795	-29269;-13682;-34644;-13682;-13682;-13682;0;0;0;0;-48752;-45408;-45408
chr10	102130121	102131096	976	*	Distal Intergenic	10	102133333	102148111	14779	1	90271	uc001kqz.4	-2237	ENSG00000235823	OLMALINC	oligodendrocyte maturation-associated long intergenic non-coding RNA	uc001kqy.3;uc001kqz.4;uc001kra.4;uc001kqx.1;uc009xwm.1	6319;90271;90271;9033;9033	23349;-2237;-2237;-39878;-39878
chr10	102821854	102823196	1343	*	Promoter (<=1kb)	10	102822260	102824178	1919	1	81621	uc001kst.1	0	ENSG00000107821	KAZALD1	Kazal type serine peptidase inhibitor domain 1	uc001ksv.3;uc021pxc.1;uc001ksn.3;uc001kso.2;uc001ksr.3;uc001kss.4;uc001kst.1;uc001ksp.3;uc010qpx.2	100038246;79955;79955;79955;81621;81621;81621;81855;81855	67707;-30940;-30940;-30940;0;0;0;30858;29783
chr10	102821854	102823196	1343	*	Promoter (<=1kb)	10	102822260	102824178	1919	1	81621	uc001kst.1	0	ENSG00000107821	KAZALD1	Kazal type serine peptidase inhibitor domain 1	uc001ksv.3;uc021pxc.1;uc001ksn.3;uc001kso.2;uc001ksr.3;uc001kss.4;uc001kst.1;uc001ksp.3;uc010qpx.2	100038246;79955;79955;79955;81621;81621;81621;81855;81855	67707;-30940;-30940;-30940;0;0;0;30858;29783
chr10	103871890	103872680	791	*	Intron (uc001kuk.4/8861, intron 1 of 10)	10	103867325	103874723	7399	2	8861	uc001kuk.4	2043	ENSG00000198728	LDB1	LIM domain binding 1	uc001kum.3;uc001kun.3;uc010qqj.2;uc009xxa.3;uc001kuj.3;uc001kuk.4;uc009xwz.3;uc001kul.3;uc001kuo.2;uc001kup.2;uc001kuq.2;uc001kur.2;uc009xxb.1	23082;23082;23082;23082;79803;8861;8861;8861;9221;9221;9221;9221;9221	-20107;-20107;-20107;-26177;46766;0;0;0;-39253;-39253;-39253;-39253;-39253
chr10	104359383	104359998	616	*	Intron (uc001kvw.2/51684, intron 8 of 9)	10	104356448	104393214	36767	1	51684	uc009xxf.2	2935	ENSG00000107882	SUFU	SUFU negative regulator of hedgehog signaling	uc001kvw.2;uc001kvx.3;uc001kvy.2;uc009xxe.2;uc009xxf.2;uc001kvz.2	51684;51684;51684;51684;51684;81603	0;0;0;0;0;-44254
chr10	104430555	104431320	766	*	Distal Intergenic	10	104404252	104418076	13825	1	81603	uc001kvz.2	26303	ENSG00000171206	TRIM8	tripartite motif containing 8	uc001kwb.2;uc001kwc.2;uc001kwa.3;uc001kvy.2;uc009xxe.2;uc009xxf.2;uc001kvz.2	118980;118980;403;51684;51684;51684;81603	-42978;-42978;0;0;0;0;26303
chr10	104433645	104434794	1150	*	3' UTR	10	104404252	104418076	13825	1	81603	uc001kvz.2	29393	ENSG00000171206	TRIM8	tripartite motif containing 8	uc001kwb.2;uc001kwc.2;uc001kwa.3;uc001kvy.2;uc009xxe.2;uc009xxf.2;uc001kvz.2	118980;118980;403;51684;51684;51684;81603	-39504;-39504;0;0;0;0;29393
chr10	105378178	105379163	986	*	Intron (uc010qqr.2/9644, intron 4 of 7)	10	105353784	105428432	74649	2	9644	uc010qqs.1	49269	ENSG00000107957	SH3PXD2A	SH3 and PX domains 2A	uc001kxh.3;uc021pxn.1;uc010qqr.2;uc010qqs.1;uc010qqt.1;uc009xxn.1;uc010qqu.1;uc001kxj.1	9148;9148;9644;9644;9644;9644;9644;9644	124443;63041;0;0;0;0;0;0
chr10	106006272	106007850	1579	*	Distal Intergenic	10	106013952	106027222	13271	1	9446	uc021pxr.1	-6102	ENSG00000148834	GSTO1	glutathione S-transferase omega 1	uc021pxt.1;uc001kyb.3;uc010qqx.2;uc010qqw.1;uc001kyc.3;uc010qqy.2;uc021pxu.1;uc021pxq.1;uc001kxw.3;uc001kxx.4;uc001kxy.1;uc001kxz.3;uc021pxr.1;uc001kya.3;uc021pxs.1	100616323;119391;119391;119391;119391;119391;119391;693194;80217;80217;80217;80217;9446;9446;9446	20313;-20781;-20781;-26593;-27037;-27037;-27037;-27631;-14152;-14152;-14152;-14152;-6102;-6618;-6618
chr10	106012667	106013827	1161	*	Promoter (<=1kb)	10	106013952	106027222	13271	1	9446	uc021pxr.1	-125	ENSG00000148834	GSTO1	glutathione S-transferase omega 1	uc021pxt.1;uc001kyb.3;uc010qqx.2;uc010qqw.1;uc001kyc.3;uc010qqy.2;uc021pxu.1;uc021pxq.1;uc001kxw.3;uc001kxx.4;uc001kxy.1;uc001kxz.3;uc021pxr.1;uc001kya.3;uc021pxs.1	100616323;119391;119391;119391;119391;119391;119391;693194;80217;80217;80217;80217;9446;9446;9446	14336;-14804;-14804;-20616;-21060;-21060;-21060;-34026;-20547;-20547;-20547;-20547;-125;-641;-641
chr10	106099276	106100425	1150	*	Promoter (1-2kb)	10	106069454	106098251	28798	2	85450	uc001kyg.4	-1025	ENSG00000148841	ITPRIP	inositol 1,4,5-trisphosphate receptor interacting protein	uc001kyb.3;uc010qqx.2;uc001kyc.3;uc010qqy.2;uc021pxu.1;uc001kyh.3;uc001kye.4;uc001kyf.4;uc001kyg.4	119391;119391;119391;119391;119391;159686;85450;85450;85450	70645;70645;64389;64389;64389;-13097;-10526;-5613;-1025
chr10	112533712	112534628	917	*	Intron (uc001kzf.2/282996, intron 1 of 13)	10	112628648	112630662	2015	2	282997	uc010qrd.1	96034	NA	PDCD4-AS1	PDCD4 antisense RNA 1	uc001kzf.2	282996	0
chr10	112616963	112618693	1731	*	Distal Intergenic	10	112628648	112630662	2015	2	282997	uc010qrd.1	11969	NA	PDCD4-AS1	PDCD4 antisense RNA 1	uc021pye.2;uc001kzg.3;uc001kzh.3;uc010qre.2;uc001kzf.2;uc010qrd.1;uc009xxw.2;uc001kzi.3;uc001kzj.3;uc001kzk.3;uc010qrf.1	100616113;27250;27250;27250;282996;282997;92482;92482;92482;92482;92482	-39155;-12860;-12860;-12860;0;11969;60001;60431;60431;60431;60431
chr10	119170030	119171901	1872	*	Distal Intergenic	10	119042606	119134937	92332	2	118987	uc001lde.1	-35093	ENSG00000165650	PDZD8	PDZ domain containing 8	uc001lde.1	118987	-35093
chr10	120851580	120852428	849	*	Distal Intergenic	10	120863611	120897376	33766	1	55855	uc001ldw.3	-11183	NA	DENND10P1	DENND10 pseudogene 1	uc001ldy.3;uc001lea.3;uc001leb.3;uc001ldw.3;uc010qsv.2;uc010qsw.2;uc010qsx.2;uc010qsy.2;uc001ldv.3;uc010qsu.2;uc001ldu.3;uc009xzg.1	119559;119559;119559;55855;55855;55855;55855;55855;641451;8661;8661;8661	68229;72776;72776;-11183;-11183;-11183;-11183;-11183;-31930;-11549;-11246;-42083
chr10	121416048	121416915	868	*	Intron (uc001lel.3/9531, intron 1 of 3)	10	121410882	121437329	26448	1	9531	uc001lem.3	5166	ENSG00000151929	BAG3	BAG cochaperone 3	uc001lel.3;uc001lem.3	9531;9531	0;0
chr10	126329767	126330596	830	*	Intron (uc001lhu.1/9679, intron 8 of 8)	10	126293770	126302710	8941	1	64077	uc009yaj.2	35997	ENSG00000107902	LHPP	phospholysine phosphohistidine inorganic pyrophosphate phosphatase	uc001lhs.2;uc001lht.2;uc009yai.2;uc009yaj.2;uc001lhu.1;uc001lhv.1;uc001lhw.3	64077;64077;64077;64077;9679;9679;9679	179426;179426;179426;35997;0;0;0
chr10	126406264	126407426	1163	*	Intron (uc001lhu.1/9679, intron 5 of 8)	10	126307863	126432930	125068	2	9679	uc001lhv.1	25504	ENSG00000189319	FAM53B	family with sequence similarity 53 member B	uc001lhy.1;uc001lhz.1;uc001lia.1;uc001lhu.1;uc001lhv.1;uc001lhw.3	399818;399818;399818;9679;9679;9679	73013;73013;73013;0;0;0
chr10	126830298	126830986	689	*	Intron (uc009yak.3/1488, intron 1 of 10)	10	126676418	126847285	170868	2	1488	uc009yak.3	16299	ENSG00000175029	CTBP2	C-terminal binding protein 2	uc009yak.3;uc001lif.4;uc009yal.3;uc001lih.4	1488;1488;1488;1488	0;0;0;0
chr10	126833678	126834433	756	*	Intron (uc009yak.3/1488, intron 1 of 10)	10	126676418	126847285	170868	2	1488	uc009yak.3	12852	ENSG00000175029	CTBP2	C-terminal binding protein 2	uc009yak.3;uc001lif.4;uc009yal.3;uc001lih.4	1488;1488;1488;1488	0;0;0;0
chr10	127487864	127488477	614	*	Intron (uc001liw.4/7390, intron 5 of 8)	10	127490626	127496056	5431	2	7390	uc021qap.1	7579	ENSG00000188690	UROS	uroporphyrinogen III synthase	uc021qaq.1;uc001liu.3;uc001lio.1;uc001lip.1;uc001liq.1;uc001lis.1;uc001lit.1;uc001lje.1;uc001ljf.1;uc001ljg.1;uc021qar.1;uc001ljb.4;uc001ljc.4;uc010quj.2;uc001ljd.4;uc001liw.4;uc001lix.4;uc021qap.1	100616327;118856;26098;26098;26098;26098;26098;55760;55760;55760;56647;56647;56647;56647;56647;7390;7390;7390	-19832;-23474;79780;79780;79780;58839;49998;54951;81407;96550;-23627;-23627;-23627;-23627;-23627;0;0;7579
chr10	135058856	135059786	931	*	Promoter (1-2kb)	10	135061015	135061124	110	2	574448	uc009ybh.2	1338	ENSG00000284219	MIR202	microRNA 202	uc009ybi.3;uc010qva.2;uc021qbe.1;uc010qvb.1;uc009ybj.2;uc001lmf.2;uc001lmg.2;uc009ybk.2;uc010qvc.2;uc010qvd.2;uc001lmh.2;uc010quy.1;uc009ybh.2;uc001lmc.3;uc001llz.1;uc001lma.1;uc001lmb.1	101;101;101;101;101;10844;10844;10844;10844;10844;10844;27287;574448;8433;85442;85442;85442	30621;30621;30621;29712;30621;0;0;0;0;0;0;7448;1338;15078;84885;78168;48294
chr10	135091901	135092399	499	*	Promoter (1-2kb)	10	135085697	135090407	4711	2	101	uc009ybj.2	-1494	ENSG00000151651	ADAM8	ADAM metallopeptidase domain 8	uc009ybi.3;uc010qva.2;uc021qbe.1;uc010qvb.1;uc009ybj.2;uc001lmf.2;uc001lmg.2;uc009ybk.2;uc010qvc.2;uc010qvd.2;uc001lmh.2;uc031pxr.1;uc021qbf.1;uc001lmj.1;uc001lml.1;uc010quy.1;uc001lmo.2;uc009ybh.2;uc001lmc.3	101;101;101;101;101;10844;10844;10844;10844;10844;10844;10844;118471;118472;118472;27287;50632;574448;8433	-1494;-1494;-1494;-2403;-1494;0;0;0;0;0;0;30261;-30495;-30024;-30024;40493;58076;-30777;48123
chr10	135516559	135518390	1832	*	Distal Intergenic	10	135493786	135498458	4673	1	653548	uc031pxx.1	22773	ENSG00000281627	DUX4L3	double homeobox 4 like 3 (pseudogene)	uc031pxv.1;uc031pxw.1;uc031pxx.1	22947;653548;653548	36001;29382;22773
chr11	220375	221693	1319	*	Intron (uc001loj.4/23410, intron 5 of 6)	11	209069	215110	6042	1	60626	uc001loh.3	11306	ENSG00000177963	RIC8A	RIC8 guanine nucleotide exchange factor A	uc001lob.3;uc010qvk.2;uc001loc.3;uc001loa.1;uc001loj.4;uc001lok.4;uc010qvm.2;uc010qvn.2;uc010qvo.2;uc010qvp.2;uc010qvq.2;uc009ybt.1;uc001lod.2;uc001loe.2;uc010qvr.1;uc001lol.2;uc001lon.2;uc001loo.2;uc001lof.3;uc001log.3;uc001loh.3	113746;113746;113746;147199;23410;23410;23410;23410;23410;23410;23410;23410;51272;51272;5719;5719;5719;5719;60626;60626;60626	23614;23614;23580;27295;0;0;0;0;0;0;0;15238;-12953;-12953;-15115;-15115;-15115;-15115;11845;11845;11306
chr11	914972	915686	715	*	Promoter (<=1kb)	11	867859	915058	47200	2	66005	uc010qww.2	0	ENSG00000177830	CHID1	chitinase domain containing 1	uc009yco.2;uc001lss.3;uc001lst.2;uc010qwu.1;uc010qwv.2;uc001lsm.3;uc001lsn.3;uc001lso.3;uc001lsp.3;uc010qww.2;uc001lsd.1;uc001lse.1;uc001lsf.1;uc001lsg.1;uc001lsh.1;uc001lsi.1;uc001lsj.1	161;161;161;66005;66005;66005;66005;66005;66005;66005;7106;7106;7106;7106;7106;7106;7106	-10123;-10123;-10123;-290;-4151;-4098;-4098;-4098;-4098;0;72148;72148;72148;72031;72031;70891;70526
chr11	2324594	2325555	962	*	Promoter (<=1kb)	11	2324074	2339430	15357	1	10077	uc001lwc.1	520	ENSG00000064201	TSPAN32	tetraspanin 32	uc001lvx.1;uc009ydk.1;uc010qxk.2;uc001lvy.1;uc009ydl.1;uc001lvz.1;uc001lwb.1;uc001lwc.1;uc001lwd.1;uc001lvv.2;uc009ydj.2;uc001lvu.3	10077;10077;10077;10077;10077;10077;10077;10077;10077;29125;29125;430	0;0;0;0;0;0;0;0;-10711;-1451;-1451;-32412
chr11	2799308	2800693	1386	*	Intron (uc001lwn.3/3784, intron 15 of 15)	11	2629558	2721228	91671	2	10984	uc001lwp.3	-78080	ENSG00000269821	KCNQ1OT1	KCNQ1 opposite strand/antisense transcript 1	uc001lwn.3;uc009ydp.2;uc001lwo.4	3784;3784;3784	0;316642;0
chr11	3190158	3191017	860	*	Distal Intergenic	11	3114615	3187969	73355	2	114879	uc009ydx.3	-2189	ENSG00000021762	OSBPL5	oxysterol binding protein like 5	uc010qxq.1;uc001lxk.2;uc001lxl.2;uc009ydw.2;uc009ydx.3;uc001lxm.1;uc001lxn.2;uc001lxo.2;uc001lxp.2	114879;114879;114879;114879;114879;114879;283303;283303;386746	-42320;-3576;-3576;-3576;-2189;-39668;-48545;-48545;49026
chr11	3252875	3253672	798	*	Promoter (<=1kb)	11	3249041	3253616	4576	2	116534	uc001lxq.5	0	ENSG00000184350	MRGPRE	MAS related GPR family member E	uc001lxq.5;uc001lxn.2;uc001lxo.2;uc001lxp.2	116534;283303;283303;386746	0;13313;13313;-12832
chr11	3328226	3329937	1712	*	Distal Intergenic	11	3379157	3400452	21296	2	7748	uc001lxs.3	70515	ENSG00000005801	ZNF195	zinc finger protein 195	uc001lxs.3;uc001lxt.3;uc001lxu.3;uc001lxv.3;uc009ydz.3;uc010qxr.2;uc021qck.1;uc031pye.1;uc031pyf.1;uc031pyg.1;uc031pyh.1;uc031pyi.1	7748;7748;7748;7748;7748;7748;7748;7748;7748;7748;7748;7748	70515;70515;70515;70515;70515;70515;70515;70515;70515;70515;70515;70515
chr11	3855523	3856475	953	*	Intron (uc001lyu.2/391, intron 1 of 1)	11	3848208	3862213	14006	2	391	uc001lyu.2	5738	ENSG00000177105	RHOG	ras homolog family member G	uc021qcp.1;uc001lyl.4;uc001lyn.5;uc010qxw.3;uc010qxy.3;uc031pyj.1;uc031pyk.1;uc031pyl.1;uc031pym.1;uc010qya.3;uc010qyb.3;uc031pyn.1;uc001lys.4;uc001lyt.4;uc021qcm.2;uc031pyo.1;uc031pyp.1;uc001lyu.2;uc001lyh.3;uc001lyi.3;uc001lyj.2;uc001lyk.2;uc010qxv.2;uc001lyv.2;uc009yef.2;uc021qco.1	100616453;27315;27315;27315;27315;27315;27315;27315;27315;27315;27315;27315;27315;27315;27315;27315;27315;391;4928;4928;4928;4928;4928;6786;6786;6786	-20817;36569;36474;36474;36474;36474;36474;36474;36474;36334;26283;26283;25757;25757;25757;25757;25757;0;-36501;-36501;-36501;-36501;-36501;-20458;-20458;-20458
chr11	5172695	5173602	908	*	Promoter (<=1kb)	11	5172661	5173599	939	2	23538	uc010qyy.2	0	ENSG00000182070	OR52A1	olfactory receptor family 52 subfamily A member 1	uc010qyy.2;uc010qyz.2;uc010qyx.2	23538;283111;390054	0;48328;-18823
chr11	5305433	5306706	1274	*	Intron (uc001mak.1/3048, intron 5 of 6)	11	5289580	5291386	1807	2	3046	uc001mal.1	-14047	ENSG00000213931	HBE1	hemoglobin subunit epsilon 1	uc001mag.3;uc001maf.1;uc001mal.1;uc001mam.1;uc001mah.1;uc001mai.1;uc001maj.1;uc001mak.1;uc010qza.2;uc001mao.1	3044;3045;3046;3046;3047;3048;3048;3048;79339;79345	-40611;-49575;-14047;0;-34346;-29038;-29038;0;16470;38876
chr11	8227409	8228741	1333	*	Distal Intergenic	11	8161208	8190590	29383	2	79608	uc001mgf.4	-36819	ENSG00000166405	RIC3	RIC3 acetylcholine receptor chaperone	uc001mgg.2;uc009yfo.2;uc001mgh.2;uc001mgc.2;uc001mgd.2;uc001mge.2;uc009yfm.2;uc009yfn.2;uc010rbl.1;uc010rbm.1;uc001mgf.4	4004;4004;4004;79608;79608;79608;79608;79608;79608;79608;79608	56684;56684;61441;-36819;-36819;-36819;-36819;-36819;-36819;-36819;-36819
chr11	8984165	8984916	752	*	Promoter (1-2kb)	11	8968840	8985989	17150	2	56674	uc001mhe.1	1073	ENSG00000175348	TMEM9B	TMEM9 domain family member B	uc031pyy.1;uc001mgx.3;uc001mgy.3;uc001mgz.3;uc021qdh.1;uc010rbr.2;uc010rbs.2;uc001mha.3;uc021qdi.1;uc001mhb.4;uc001mhc.4;uc001mhe.1;uc001mhf.2;uc010rbt.1;uc001mhg.2;uc010rbu.1;uc001mhd.1	493900;56672;56672;56672;56672;56672;56672;56672;56672;56673;56673;56674;56674;56674;56675;56675;56676	-1306;51464;51464;51464;51464;51426;51426;51426;51426;-29612;-29612;0;0;0;40680;40680;-19585
chr11	9573325	9573920	596	*	Distal Intergenic	11	9595228	9611313	16086	1	7465	uc001mhs.3	-21308	ENSG00000166483	WEE1	WEE1 G2 checkpoint kinase	uc001mhs.3;uc001mht.3;uc001mhu.3;uc001mhr.3;uc009yfu.3;uc010rby.2	7465;7465;7465;7702;7702;7702	-21308;-22314;-23168;90813;90813;90813
chr11	9587219	9588018	800	*	Distal Intergenic	11	9595228	9611313	16086	1	7465	uc001mhs.3	-7210	ENSG00000166483	WEE1	WEE1 G2 checkpoint kinase	uc001mhs.3;uc001mht.3;uc001mhu.3;uc001mhr.3;uc009yfu.3;uc010rby.2	7465;7465;7465;7702;7702;7702	-7210;-8216;-9070;104707;104707;104707
chr11	10920857	10922015	1159	*	Distal Intergenic	11	10879810	10900823	21014	1	729013	uc001mjm.2	41047	ENSG00000247271	ZBED5-AS1	ZBED5 antisense RNA 1	uc001mjg.1;uc009ygg.3;uc001mji.4;uc009ygh.3;uc001mjk.4;uc001mjl.2;uc001mjm.2	58486;58486;58486;58486;58486;729013;729013	-43053;-41491;-41237;-41237;-41237;41093;41047
chr11	12116285	12116880	596	*	Promoter (<=1kb)	11	12115543	12285329	169787	1	9645	uc010rch.1	742	ENSG00000133816	MICAL2	microtubule associated monooxygenase, calponin and LIM domain containing 2	uc010rch.1;uc001mjy.3;uc001mjz.3;uc001mka.3;uc010rci.2	9645;9645;9645;9645;9645	0;0;0;0;0
chr11	12221859	12223279	1421	*	Intron (uc010rch.1/9645, intron 3 of 22)	11	12229272	12285331	56060	1	9645	uc001mkd.3	-5993	ENSG00000133816	MICAL2	microtubule associated monooxygenase, calponin and LIM domain containing 2	uc010rch.1;uc001mjy.3;uc001mjz.3;uc001mka.3;uc010rci.2;uc001mkb.3;uc001mkc.3;uc001mkd.3;uc010rcj.2;uc001mkf.3	9645;9645;9645;9645;9645;9645;9645;9645;9645;9645	0;0;0;0;0;0;0;-5993;-20885;-37704
chr11	12221859	12223279	1421	*	Intron (uc010rch.1/9645, intron 3 of 22)	11	12229272	12285331	56060	1	9645	uc001mkd.3	-5993	ENSG00000133816	MICAL2	microtubule associated monooxygenase, calponin and LIM domain containing 2	uc010rch.1;uc001mjy.3;uc001mjz.3;uc001mka.3;uc010rci.2;uc001mkb.3;uc001mkc.3;uc001mkd.3;uc010rcj.2;uc001mkf.3	9645;9645;9645;9645;9645;9645;9645;9645;9645;9645	0;0;0;0;0;0;0;-5993;-20885;-37704
chr11	12874955	12876189	1235	*	Intron (uc021qdx.1/7003, intron 3 of 12)	11	12900990	12966284	65295	1	7003	uc001mkk.4	-24801	ENSG00000187079	TEAD1	TEA domain transcription factor 1	uc021qdx.1;uc009ygk.3;uc001mkk.4;uc009ygl.3	7003;7003;7003;7003	0;0;-24801;-25066
chr11	20480382	20481928	1547	*	Intron (uc001mqb.3/10196, intron 11 of 15)	11	20409076	20530879	121804	1	10196	uc010rdn.2	71306	ENSG00000185238	PRMT3	protein arginine methyltransferase 3	uc001mqb.3;uc001mqc.3;uc010rdn.2	10196;10196;10196	0;0;0
chr11	33758490	33759576	1087	*	Promoter (<=1kb)	11	33724556	33758025	33470	2	966	uc009yka.3	-465	ENSG00000085063	CD59	CD59 molecule (CD59 blood group)	uc001muq.2;uc001mur.2;uc010rej.2;uc001muy.3;uc001muz.3;uc009ykb.3;uc001mva.1;uc001mvb.1;uc010rek.1;uc001mus.4;uc009yjx.3;uc009yjy.3;uc009yjz.3;uc001mut.4;uc001muu.4;uc001muv.4;uc009yka.3	100131378;100131378;26273;26273;26273;26273;26273;26273;26273;966;966;966;966;966;966;966;966	-36204;-36204;15369;36317;36495;36495;36495;36495;36495;-14217;-14217;-14217;-13992;-465;-465;-465;-465
chr11	33902771	33904117	1347	*	5' UTR	11	33880123	33913836	33714	2	4005	uc010rem.2	9719	ENSG00000135363	LMO2	LIM domain only 2	uc001mvc.3;uc001mvd.3;uc001mve.3;uc010rel.2;uc010rem.2	4005;4005;4005;4005;4005	-16074;-11639;-11400;-11262;0
chr11	33906157	33907419	1263	*	Intron (uc010rem.2/4005, intron 1 of 5)	11	33880123	33913836	33714	2	4005	uc010rem.2	6417	ENSG00000135363	LMO2	LIM domain only 2	uc001mvc.3;uc001mvd.3;uc001mve.3;uc010rel.2;uc010rem.2	4005;4005;4005;4005;4005	-19460;-15025;-14786;-14648;0
chr11	33965986	33966995	1010	*	Distal Intergenic	11	33880123	33913836	33714	2	4005	uc010rem.2	-52150	ENSG00000135363	LMO2	LIM domain only 2	NA	NA	NA
chr11	34459161	34460996	1836	*	Promoter (<=1kb)	11	34460472	34493607	33136	1	847	uc001mvm.3	0	ENSG00000121691	CAT	catalase	uc001mvo.1;uc021qft.1;uc001mvp.2;uc009ykd.2;uc001mvm.3;uc009ykc.1	2001;2001;2001;2001;847;847	72350;72350;74351;74351;0;-9743
chr11	44802191	44803209	1019	*	Intron (uc001mye.4/90139, intron 1 of 8)	11	44785976	44953977	168002	1	90139	uc001mye.4	16215	ENSG00000157570	TSPAN18	tetraspanin 18	uc001mye.4	90139	0
chr11	47198442	47199166	725	*	Promoter (<=1kb)	11	47185849	47198676	12828	2	84364	uc001ndt.3	0	ENSG00000149182	ARFGAP2	ARF GTPase activating protein 2	uc001neb.2;uc001nec.2;uc001ned.2;uc001nee.2;uc009yli.1;uc001nef.2;uc001ndw.3;uc001ndx.3;uc001ndy.3;uc001ndp.4;uc001ndq.4;uc001ndr.4;uc010rgx.3;uc010rgy.3;uc010rgz.3;uc001nds.4;uc010rha.2;uc001ndt.3;uc001ndu.3;uc010rhb.2;uc010rhc.2;uc010rhd.2	1643;1643;1643;1643;1643;1643;29763;29763;29763;79096;79096;79096;79096;79096;79096;79096;84364;84364;84364;84364;84364;84364	-37327;-37327;-37327;-37327;-37327;-37480;0;0;0;240202;240202;240202;240202;240202;240202;240202;-3051;0;0;0;0;0
chr11	57163079	57164407	1329	*	Intron (uc001nke.3/5553, intron 8 of 12)	11	57154834	57158130	3297	2	5553	uc001nkd.3	-4949	ENSG00000186652	PRG2	proteoglycan 2, pro eosinophil major basic protein	uc001njv.2;uc001nkg.4;uc001nkh.4;uc009yme.4;uc010rjr.3;uc001nki.3;uc009ymf.2;uc010rjs.1;uc009ymg.2;uc001nju.3;uc001nkc.3;uc001nkd.3;uc001nke.3	10394;29015;29015;29015;29015;29015;29015;29015;29015;5024;5553;5553;5553	-14456;30153;30214;30214;30214;30646;30153;29545;30214;57238;-4949;-4949;0
chr11	57298271	57299509	1239	*	Promoter (<=1kb)	11	57295936	57298232	2297	2	26519	uc001nkm.1	-39	ENSG00000134809	TIMM10	translocase of inner mitochondrial membrane 10	uc021qjh.1;uc001nkm.1;uc001nkk.3;uc001nkl.3;uc001nkn.2;uc001nko.2	219537;26519;8501;8501;9246;9246	-10605;-39;-15913;-15079;35671;36294
chr11	57415438	57416732	1295	*	Promoter (<=1kb)	11	57412560	57417417	4858	2	219539	uc001nkv.4	685	ENSG00000166793	YPEL4	yippee like 4	uc001nkw.3;uc009yml.3;uc010rjw.2;uc001nkv.4;uc009ymk.3;uc001nkx.1;uc001nky.1;uc001nkz.1;uc001nku.1;uc001nkp.1;uc010rju.1;uc010rjv.1;uc001nkr.1;uc001nks.1	10978;10978;10978;219539;219539;25921;25921;25921;406919;710;710;710;710;710	-8484;-8484;-8484;0;0;-18742;-18742;-32219;6767;50411;50411;50411;49733;49716
chr11	57503093	57503796	704	*	Intron (uc001nlc.2/51075, intron 1 of 7)	11	57508722	57510883	2162	1	280636	uc021qjj.1	-4926	ENSG00000211450	SELENOH	selenoprotein H	uc001nlf.2;uc001nlh.1;uc021qjk.1;uc001nli.4;uc001nlj.4;uc001nlk.4;uc001nll.4;uc001nlm.4;uc001nln.4;uc001nlo.4;uc001nlp.4;uc001nlq.4;uc001nlr.4;uc001nls.4;uc001nlt.4;uc001nlu.4;uc001nlv.4;uc001nlw.4;uc001nlx.4;uc001nly.4;uc001nlz.4;uc001nma.4;uc001nmb.4;uc001nmc.4;uc001nmd.4;uc001nme.4;uc001nmf.4;uc001nmg.4;uc001nmh.4;uc001nmi.4;uc009ymn.3;uc001nla.1;uc001nlb.3;uc031qba.1;uc001nkx.1;uc001nky.1;uc0…	100528016;100528016;1500;1500;1500;1500;1500;1500;1500;1500;1500;1500;1500;1500;1500;1500;1500;1500;1500;1500;1500;1500;1500;1500;1500;1500;1500;1500;1500;1500;1500;219541;219541;219541;25921;25921;25921;280636;51075;51075;51075;51075;643376;643376	0;-16966;-16919;-25438;-25438;-25438;-25438;-25438;-25438;-25438;-25438;-25438;-25438;-25438;-25438;-25438;-25438;-25438;-25438;-25438;-25438;-25438;-25438;-25438;-25438;-25438;-25438;-25438;-25438;-25438;-25438;-23420;-23420;-23420;67619;67619;54142;-4926;0;0;0;0;15050;15457
chr11	59473718	59475051	1334	*	Distal Intergenic	11	59480389	59481318	930	2	390201	uc001nof.1	6267	ENSG00000172289	OR10V1	olfactory receptor family 10 subfamily V member 1	uc001noe.4;uc009yms.1;uc010rkw.2;uc001nof.1;uc001nog.3;uc010rkx.2;uc010rky.2;uc021qjz.1	219988;219988;219988;390201;6809;6809;6809;81343	-37207;-37207;-47299;6267;-47481;-47481;-47481;-41234
chr11	60917222	60917700	479	*	Intron (uc001nqv.1/55048, intron 1 of 4)	11	60897728	60928916	31189	2	55048	uc001nqv.1	11216	ENSG00000167987	VPS37C	VPS37C subunit of ESCRT-I	uc001nqv.1;uc001nqw.1;uc009ynk.3	55048;55048;921	0;0;47292
chr11	61054684	61055764	1081	*	Intron (uc001nra.3/220001, intron 4 of 19)	11	61025758	61062788	37031	2	220001	uc001nra.3	7024	ENSG00000167992	VWCE	von Willebrand factor C and EGF domains	uc001nrc.5;uc010rle.2;uc010rlf.1;uc010rlg.1;uc001nrd.3;uc009ynl.2;uc001nra.3;uc001nrb.3;uc001nre.3;uc009ynm.1;uc001nqz.3	1642;1642;1642;1642;1642;1642;220001;220001;26007;26007;5222	44920;44920;54283;39259;44920;44920;0;0;-44890;-49649;46040
chr11	61601781	61602536	756	*	Intron (uc001nsj.2/9415, intron 1 of 11)	11	61595713	61634825	39113	1	9415	uc001nsl.1	6068	ENSG00000134824	FADS2	fatty acid desaturase 2	uc021qkk.1;uc001nsg.3;uc001nsh.3;uc010rlm.2;uc010rln.1;uc001nsm.3;uc021qki.1;uc001nsc.1;uc001nse.1;uc010rll.1;uc001nsf.3;uc001nsj.2;uc010rlo.1;uc001nsk.3;uc001nsl.1	100302263;2237;3992;3992;3992;3995;693196;745;745;745;746;9415;9415;9415;9415	-19069;41672;-20775;-17252;-19192;56470;-41748;81660;78920;56703;-41696;0;0;0;0
chr11	61636711	61637926	1216	*	Distal Intergenic	11	61640998	61659006	18009	2	3995	uc001nsm.3	21080	ENSG00000221968	FADS3	fatty acid desaturase 3	uc001nsm.3;uc001nso.4;uc001nsp.4;uc001nsj.2;uc010rlo.1;uc001nsk.3;uc001nsl.1	3995;5866;5866;9415;9415;9415;9415	21080;47155;49815;0;0;0;0
chr11	61792880	61793554	675	*	Distal Intergenic	11	61731757	61735132	3376	2	2495	uc001nsu.3	-57748	ENSG00000167996	FTH1	ferritin heavy chain 1	NA	NA	NA
chr11	61809167	61810449	1283	*	Distal Intergenic	11	61731757	61735132	3376	2	2495	uc001nsu.3	-74035	ENSG00000167996	FTH1	ferritin heavy chain 1	NA	NA	NA
chr11	64102261	64103241	981	*	Distal Intergenic	11	64107690	64121642	13953	1	283234	uc009ypo.2	-4449	ENSG00000168071	CCDC88B	coiled-coil domain containing 88B	uc021qkv.1;uc001nzq.1;uc001nzr.1;uc001nzs.1;uc009ypn.1;uc001nzu.3;uc001nzv.3;uc001nzw.3;uc009ypm.3;uc009ypo.2;uc001nzy.3;uc001nzz.1;uc001oaa.3;uc001oab.1;uc001oac.3;uc009ypl.1;uc001nzj.1;uc001nzk.1;uc010rnk.1;uc001nzl.1;uc001nzm.4;uc001nzn.1;uc001nzo.2;uc001nzt.3;uc010rni.2;uc010rnj.2;uc001nze.2;uc001nzf.3;uc001nzh.2;uc001nzi.3;uc021qkt.1;uc001oad.3;uc001oae.3;uc001oaf.3;uc009ypp.3;uc010rnl.2	100302280;2101;2101;2101;2101;25824;25824;25824;25858;283234;283234;283234;283234;283234;283234;50801;50801;50801;50801;50801;50801;50801;50801;51504;56834;56834;56834;56834;56834;56834;56834;8986;8986;8986;8986;8986	-32833;29217;29217;28562;20550;16701;16701;16701;35443;-4449;-4449;-6962;-13062;-17117;-17582;43468;43468;43468;43468;43067;43067;42779;42162;-17228;50450;49978;49976;49976;48679;48679;48679;-23384;-23384;-23384;-23384;-23384
chr11	64656042	64657067	1026	*	Promoter (1-2kb)	11	64658609	64658718	110	2	406967	uc010rnr.1	1651	ENSG00000283926	MIR192	microRNA 192	uc021qkz.1;uc001obu.1;uc001obv.1;uc010rnq.1;uc001oca.3;uc001obw.3;uc001obx.3;uc010rnt.1;uc001ocb.1;uc001occ.1;uc001ocd.1;uc010rnr.1;uc010rns.1;uc001oby.3;uc001obz.3;uc001obs.4	10938;10938;10938;10938;170589;23130;23130;23130;283129;283129;283129;406967;406970;5526;5526;55561	-32710;-9851;-8893;-8893;46293;13769;27655;27655;70540;82490;82490;1651;1844;-35076;-35847;-44001
chr11	65149830	65150253	424	*	Promoter (<=1kb)	11	65142663	65149857	7195	2	283130	uc001odq.2	0	ENSG00000162241	SLC25A45	solute carrier family 25 member 45	uc001odo.4;uc009yqi.1;uc001odq.2;uc001odr.1;uc001ods.1;uc001odt.1;uc010rog.2;uc001odm.3;uc010roe.2;uc001odu.4;uc009yqj.3;uc010rof.2	220359;283130;283130;283130;283130;283130;283131;5977;5977;83786;83786;83786	27548;-390;0;0;0;0;0;48605;48605;-3788;-3788;-3788
chr11	65188240	65189128	889	*	Promoter (1-2kb)	11	65190269	65212028	21760	1	283131	uc010rog.2	-1141	ENSG00000245532	NEAT1	nuclear paraspeckle assembly transcript 1	uc009yqi.1;uc001odq.2;uc001odr.1;uc001ods.1;uc001odt.1;uc010rog.2;uc001odu.4;uc009yqj.3;uc010rof.2	283130;283130;283130;283130;283130;283131;83786;83786;83786	-38800;0;0;0;0;0;34199;34199;34199
chr11	65189365	65190370	1006	*	Promoter (<=1kb)	11	65190269	65212028	21760	1	283131	uc010rog.2	0	ENSG00000245532	NEAT1	nuclear paraspeckle assembly transcript 1	uc009yqi.1;uc001odq.2;uc001odr.1;uc001ods.1;uc001odt.1;uc010rog.2;uc001odu.4;uc009yqj.3;uc010rof.2	283130;283130;283130;283130;283130;283131;83786;83786;83786	-39925;0;0;0;0;0;35324;35324;35324
chr11	65189365	65190370	1006	*	Promoter (<=1kb)	11	65190269	65212028	21760	1	283131	uc010rog.2	0	ENSG00000245532	NEAT1	nuclear paraspeckle assembly transcript 1	uc009yqi.1;uc001odq.2;uc001odr.1;uc001ods.1;uc001odt.1;uc010rog.2;uc001odu.4;uc009yqj.3;uc010rof.2	283130;283130;283130;283130;283130;283131;83786;83786;83786	-39925;0;0;0;0;0;35324;35324;35324
chr11	65403539	65404196	658	*	Promoter (<=1kb)	11	65403781	65403840	60	1	100616292	uc021qln.1	0	ENSG00000266041	MIR4690	microRNA 4690	uc021qlo.1;uc021qln.1;uc001oeq.3;uc001oer.3;uc001oes.3;uc001oeu.3;uc001oeo.4;uc001oey.2;uc009yqn.3;uc001oez.2;uc001oev.3;uc010rol.2;uc001oew.3;uc001oex.1;uc001off.3;uc001ofg.3;uc001ofh.3;uc009yqr.3;uc010ron.2;uc021qlq.1;uc001ofe.2;uc009yqs.1;uc001ofb.2;uc010rom.1;uc001ofd.2	100616284;100616292;10089;10089;10089;10089;254102;399909;399909;399909;4296;4296;4296;4296;5970;5970;5970;5970;5970;5970;5970;5970;6494;6494;6494	-12467;0;-40072;-40072;-40072;-40072;60030;0;10941;0;-29045;-24996;-21819;-27620;26247;26247;26247;26247;26247;26247;26247;23063;-1382;-3147;-3396
chr11	69794487	69795309	823	*	Distal Intergenic	11	69924408	70035652	111245	1	55107	uc001opj.3	-129099	ENSG00000131620	ANO1	anoctamin 1	NA	NA	NA
chr11	71416283	71417543	1261	*	Distal Intergenic	11	71498557	71512280	13724	1	55199	uc001oqv.4	-81014	ENSG00000158483	FAM86C1P	family with sequence similarity 86, member C	NA	NA	NA
chr11	71706310	71707303	994	*	3' UTR	11	71709958	71713850	3893	1	10068	uc001ore.1	-2655	ENSG00000137496	IL18BP	interleukin 18 binding protein	uc001ore.1;uc001orf.1;uc021qmv.1;uc001org.1;uc001orh.2;uc001ori.2;uc009ysv.1;uc001orj.2;uc009ysw.1;uc001ork.1;uc001orl.1;uc001orm.1;uc001orn.2;uc009ysx.1;uc001oro.1;uc009ysy.2;uc001orp.3;uc001orq.3;uc021qmw.1;uc001ora.3;uc001orb.3;uc001ord.3;uc009yst.3	10068;10068;10068;10068;10068;10068;10068;4926;4926;4926;4926;4926;4926;4926;4926;4926;4926;4926;4926;55298;55298;55298;55298	-2655;-2655;-2655;-2806;-2806;-3360;-3670;12588;20003;84217;84270;84270;20003;44829;84217;44829;73806;84270;84270;0;0;0;0
chr11	72853449	72854864	1416	*	Promoter (<=1kb)	11	72547790	72853143	305354	2	9873	uc010rrg.2	-306	ENSG00000137478	FCHSD2	FCH and double SH3 domains 2	uc001oth.4;uc009ytl.3;uc010rrg.2;uc001oti.2	9873;9873;9873;9873	-306;-306;-306;-2276
chr11	73086844	73087502	659	*	Promoter (<=1kb)	11	73087405	73108519	21115	1	84957	uc001otv.3	0	ENSG00000054967	RELT	RELT TNF receptor	uc001oty.1;uc001otz.1;uc009ytp.1;uc001otv.3;uc001otw.3;uc009yto.1;uc001otx.3;uc001otu.3	23201;23201;23201;84957;84957;84957;84957;9828	221726;221726;221726;0;-211;-14298;-16787;67181
chr11	73721861	73723192	1332	*	Promoter (1-2kb)	11	73713812	73720282	6471	2	7352	uc001ous.2	-1579	ENSG00000175564	UCP3	uncoupling protein 3	uc001out.3;uc001ouu.2;uc001ouo.3;uc001oup.1;uc001our.3;uc001ous.2	26005;26005;374407;7351;7352;7352	73739;158872;60497;-27972;-1579;-1579
chr11	75245306	75246610	1305	*	Distal Intergenic	11	75196350	75236599	40250	2	81544	uc001owq.4	-8707	ENSG00000158555	GDPD5	glycerophosphodiester phosphodiesterase domain containing 5	uc009yud.3;uc001owo.4;uc001owp.4;uc001owq.4;uc009yuf.3;uc001owr.3;uc009yug.3;uc001ows.3;uc001owt.3	81544;81544;81544;81544;871;871;871;871;871	-43941;-43510;-8707;-8707;-26491;-26491;-26491;-26805;-32217
chr11	75300717	75301601	885	*	Intron (uc001owu.3/4135, intron 3 of 3)	11	75278827	75283849	5023	1	871	uc001owt.3	21890	ENSG00000149257	SERPINH1	serpin family H member 1	uc001owu.3;uc001owv.3;uc009yuf.3;uc001owr.3;uc009yug.3;uc001ows.3;uc001owt.3	4135;4135;871;871;871;871;871	0;77878;27616;27616;27616;27302;21890
chr11	75479226	75480096	871	*	Promoter (<=1kb)	11	75469500	75479692	10193	2	283214	uc001owz.3	0	ENSG00000247867	DGAT2-DT	DGAT2 divergent transcript	uc001owz.3;uc001oxc.3;uc001oww.1;uc010rru.2;uc010rrv.2;uc001oxa.3;uc001oxb.3	283214;7405;80168;80168;80168;84649;84649	0;-46116;50292;50292;48807;0;0
chr11	76455850	76457558	1709	*	Distal Intergenic	11	76391210	76432833	41624	2	390226	uc001oxs.4	-23017	NA	GUCY2EP	guanylate cyclase 2E, pseudogene	uc031qcw.1;uc001oxt.3;uc001oxs.4	25987;25987;390226	-35799;-36727;-23017
chr11	97833947	97835553	1607	*	Distal Intergenic	11	98891706	100096179	1204474	1	53942	uc009ywv.2	-1056153	ENSG00000149972	CNTN5	contactin 5	NA	NA	NA
chr11	113953045	113954180	1136	*	Intron (uc001poo.1/7704, intron 2 of 3)	11	113931288	114121397	190110	1	7704	uc001poq.3	21757	ENSG00000109906	ZBTB16	zinc finger and BTB domain containing 16	uc001poo.1;uc001pop.3;uc001poq.3	7704;7704;7704	0;0;0
chr11	114086136	114088001	1866	*	Intron (uc001pop.3/7704, intron 4 of 6)	11	114128553	114183238	54686	1	4837	uc001por.1	-40552	ENSG00000166741	NNMT	nicotinamide N-methyltransferase	uc001por.1;uc001poo.1;uc001pop.3;uc001poq.3	4837;7704;7704;7704	-40552;0;0;0
chr11	118958048	118959306	1259	*	Promoter (<=1kb)	11	118958697	118964259	5563	1	3145	uc001pvf.1	0	ENSG00000256269	HMBS	hydroxymethylbilane synthase	uc001put.2;uc001puu.2;uc010ryu.1;uc010ryv.1;uc001pux.3;uc010ryw.2;uc001puw.1;uc001pvi.3;uc001pvj.3;uc001pvk.3;uc001pvm.1;uc010rza.2;uc010rzb.2;uc001pvp.3;uc001pvq.3;uc021qrj.1;uc001pvr.3;uc001pvg.3;uc009zao.2;uc001puz.1;uc001pva.1;uc001pve.2;uc001pvf.1;uc010ryx.2;uc010ryy.2;uc001pvn.3;uc001pvo.3	10525;10525;10525;10525;10525;10525;10525;1798;1798;1798;1798;1798;25988;25988;25988;25988;25988;3014;3145;3145;3145;3145;3145;55823;55823;9854;9854	-31493;-30132;-30132;-30132;-30123;-30132;-30266;13479;13479;13546;12247;13479;-32927;-32927;-32927;-32927;-42843;6871;0;0;0;0;0;19555;19516;0;0
chr11	118977589	118978113	525	*	Promoter (<=1kb)	11	118978093	118987827	9735	1	9854	uc001pvn.3	0	ENSG00000172375	C2CD2L	C2CD2 like	uc001puu.2;uc010ryu.1;uc010ryv.1;uc001pux.3;uc010ryw.2;uc001puw.1;uc001pvi.3;uc001pvj.3;uc001pvk.3;uc001pvm.1;uc010rza.2;uc010rzb.2;uc001pvp.3;uc001pvq.3;uc021qrj.1;uc001pvr.3;uc001pvg.3;uc009zao.2;uc001puz.1;uc001pva.1;uc001pve.2;uc001pvf.1;uc010ryx.2;uc010ryy.2;uc001pvs.3;uc009zar.3;uc001pvn.3;uc001pvo.3	10525;10525;10525;10525;10525;10525;1798;1798;1798;1798;1798;25988;25988;25988;25988;25988;3014;3145;3145;3145;3145;3145;55823;55823;64137;64137;9854;9854	-49673;-49673;-49673;-49664;-49673;-49807;-4804;-4804;-4737;-6036;-4804;-14120;-14120;-14120;-14120;-24036;-11412;0;0;0;0;0;39096;39057;-41637;-42186;0;0
chr11	119613094	119614049	956	*	Distal Intergenic	11	119545099	119599435	54337	2	5818	uc001pww.3	-13659	ENSG00000110400	NECTIN1	nectin cell adhesion molecule 1	uc001pwu.1;uc001pwv.3;uc001pww.3	5818;5818;5818	-13659;-13659;-13659
chr11	119992620	119993207	588	*	Promoter (<=1kb)	11	119981994	119992701	10708	2	23650	uc001pwx.3	0	ENSG00000137699	TRIM29	tripartite motif containing 29	uc001pwx.3;uc010rzi.2;uc010rzj.2;uc001pwz.3;uc001pxa.3	23650;23650;23650;23650;23650	0;0;0;0;0
chr11	120210001	120210849	849	*	Intron (uc021qrm.1/23365, intron 1 of 18)	11	120207618	120360645	153028	1	23365	uc009zat.3	2383	ENSG00000196914	ARHGEF12	Rho guanine nucleotide exchange factor 12	uc001pxg.3;uc001pxh.2;uc001pxi.2;uc001pxj.3;uc009zas.2;uc010rzm.2;uc021qrl.1;uc021qrm.1;uc001pxl.2;uc009zat.3;uc010rzn.1;uc009zau.1;uc021qrk.1;uc001pxc.3;uc010rzk.2;uc010rzl.2;uc001pxe.1	219902;219902;219902;219902;219902;219902;219902;23365;23365;23365;23365;23365;25833;25833;25833;25833;25833	14163;14163;14163;14163;14163;14163;14163;0;0;0;-45178;-45178;102652;99098;99098;99098;33804
chr12	64633	65339	707	*	Distal Intergenic	12	73880	90369	16490	1	100288778	uc031qfi.1	-8541	ENSG00000226210	WASH8P	WAS protein family homolog 8, pseudogene	uc031qfi.1;uc010scy.2;uc010scz.2;uc010sdb.1;uc010sdc.1;uc010sdd.2;uc010sde.2;uc010sdf.2;uc010sdg.2;uc010sdh.2	100288778;100288778;100288778;100288778;100288778;100288778;100288778;100288778;100288778;100288778	-8541;-8933;-8933;-13447;-22533;-22533;-22533;-22533;-22542;-22918
chr12	70483	71482	1000	*	Distal Intergenic	12	73880	90369	16490	1	100288778	uc031qfi.1	-2398	ENSG00000226210	WASH8P	WAS protein family homolog 8, pseudogene	uc031qfi.1;uc010scy.2;uc010scz.2;uc010sdb.1;uc010sdc.1;uc010sdd.2;uc010sde.2;uc010sdf.2;uc010sdg.2;uc010sdh.2	100288778;100288778;100288778;100288778;100288778;100288778;100288778;100288778;100288778;100288778	-2398;-2790;-2790;-7304;-16390;-16390;-16390;-16390;-16399;-16775
chr12	280710	282046	1337	*	Intron (uc001qhw.2/440073, intron 13 of 13)	12	246577	258332	11756	2	574538	uc001qhv.1	-22378	ENSG00000249695	LOC574538	uncharacterized LOC574538	uc001qhw.2;uc001qhu.1;uc001qhv.1;uc001qhy.3;uc001qhz.3;uc001qia.3;uc001qib.3;uc009zdh.2;uc009zdi.1;uc009zdj.2;uc001qic.2;uc010sdl.2	440073;440073;574538;6539;6539;6539;6539;6539;6539;6540;6540;6540	0;94168;-22378;26178;40567;40817;41325;41325;41325;87177;89993;89993
chr12	700238	701788	1551	*	Intron (uc001qil.3/4815, intron 1 of 3)	12	661699	671058	9360	1	283358	uc001qik.1	38539	ENSG00000139044	B4GALNT3	beta-1,4-N-acetyl-galactosaminyltransferase 3	uc001qii.1;uc001qij.1;uc001qik.1;uc001qil.3;uc010sdr.2;uc010sds.2	283358;283358;283358;4815;4815;4815	130695;47939;38539;0;0;0
chr12	1413171	1414132	962	*	Intron (uc001qiz.2/23085, intron 15 of 19)	12	1299025	1605099	306075	1	23085	uc001qje.2	114146	ENSG00000082805	ERC1	ELKS/RAB6-interacting/CAST family member 1	uc001qiz.2;uc001qja.2;uc001qjb.2;uc001qjc.2;uc001qjd.2;uc001qjf.2;uc010sdv.1;uc001qje.2	23085;23085;23085;23085;23085;23085;23085;23085	0;0;0;0;0;0;0;0
chr12	1771085	1771632	548	*	Promoter (1-2kb)	12	1769481	1769546	66	2	100500816	uc021qsw.1	-1539	ENSG00000266043	MIR3649	microRNA 3649	uc021qsw.1;uc001qjm.3;uc001qjn.3;uc009zdq.3;uc001qjj.3;uc001qjk.3;uc001qjl.3	100500816;79602;79602;81029;81029;81029;81029	-1539;-28615;-28629;87262;44863;32673;31107
chr12	2024659	2027407	2749	*	Promoter (<=1kb)	12	1901123	2027870	126748	2	93589	uc021qsx.1	463	ENSG00000151062	CACNA2D4	calcium voltage-gated channel auxiliary subunit alpha2delta 4	uc001qjw.3;uc010sdy.1;uc001qjx.1;uc021qsx.1;uc009zds.2;uc009zdt.1	100271702;196513;196513;93589;93589;93589	18335;86270;86270;0;0;0
chr12	2024659	2027407	2749	*	Promoter (<=1kb)	12	1901123	2027870	126748	2	93589	uc021qsx.1	463	ENSG00000151062	CACNA2D4	calcium voltage-gated channel auxiliary subunit alpha2delta 4	uc001qjw.3;uc010sdy.1;uc001qjx.1;uc021qsx.1;uc009zds.2;uc009zdt.1	100271702;196513;196513;93589;93589;93589	18335;86270;86270;0;0;0
chr12	2024659	2027407	2749	*	Promoter (<=1kb)	12	1901123	2027870	126748	2	93589	uc021qsx.1	463	ENSG00000151062	CACNA2D4	calcium voltage-gated channel auxiliary subunit alpha2delta 4	uc001qjw.3;uc010sdy.1;uc001qjx.1;uc021qsx.1;uc009zds.2;uc009zdt.1	100271702;196513;196513;93589;93589;93589	18335;86270;86270;0;0;0
chr12	2024659	2027407	2749	*	Promoter (<=1kb)	12	1901123	2027870	126748	2	93589	uc021qsx.1	463	ENSG00000151062	CACNA2D4	calcium voltage-gated channel auxiliary subunit alpha2delta 4	uc001qjw.3;uc010sdy.1;uc001qjx.1;uc021qsx.1;uc009zds.2;uc009zdt.1	100271702;196513;196513;93589;93589;93589	18335;86270;86270;0;0;0
chr12	6744383	6745089	707	*	Promoter (<=1kb)	12	6728001	6745297	17297	2	57121	uc001qps.2	208	ENSG00000184574	LPAR5	lysophosphatidic acid receptor 5	uc001qpn.3;uc001qpo.3;uc001qpp.3;uc001qqa.3;uc001qqd.3;uc010sfh.2;uc009zew.1;uc001qpv.4;uc001qpw.4;uc001qpx.4;uc001qpy.4;uc009zes.3;uc009zet.3;uc009zeu.3;uc009zev.3;uc009zer.2;uc001qps.2;uc010sff.1;uc001qpt.1;uc001qpu.1;uc010sfg.1	1108;1108;1108;171017;171017;171017;171017;51147;51147;51147;51147;51147;51147;51147;51147;57121;57121;57121;84519;84519;84519	-28766;-27832;-27832;53452;53649;53649;42537;27219;27219;27219;27219;27219;27219;27219;27219;-3568;0;0;2928;11491;11491
chr12	12910407	12911027	621	*	Intron (uc001rau.4/81575, intron 1 of 1)	12	12917583	12917677	95	1	693198	uc021qvl.1	-6556	ENSG00000207983	MIR613	microRNA 613	uc001rat.2;uc001rav.3;uc021qvl.1;uc001rau.4;uc001raw.4	1027;51202;693198;81575;81575	40105;0;-6556;0;-27514
chr12	18976916	18977753	838	*	Distal Intergenic	12	18891045	18892122	1078	1	93661	uc001rdy.3	85871	ENSG00000177938	CAPZA3	capping actin protein of muscle Z-line subunit alpha 3	NA	NA	NA
chr12	31218876	31219867	992	*	Intron (uc001rjq.2/100506660, intron 1 of 2)	12	31226779	31243028	16250	1	1663	uc010sjw.1	-6912	ENSG00000013573	DDX11	DEAD/H-box helicase 11	uc001rjq.2;uc010sjw.1;uc010sjx.1;uc001rjr.1;uc001rjs.1;uc001rjt.1;uc001rju.1;uc001rjv.2;uc001rjw.2;uc001rjx.1;uc009zjn.1;uc009zjo.1	100506660;1663;1663;1663;1663;1663;1663;1663;1663;1663;1663;1663	0;-6912;-6912;-6912;-6912;-6912;-6912;-6912;-6912;-20952;-22111;-35494
chr12	32158286	32159598	1313	*	Distal Intergenic	12	32146773	32146802	30	2	100873778	uc031qgy.1	-11484	ENSG00000199767	RNU6-78P	RNA, U6 small nuclear 78, pseudogene	uc031qgy.1;uc001rks.3	100873778;55196	-11484;45933
chr12	32158286	32159598	1313	*	Distal Intergenic	12	32146773	32146802	30	2	100873778	uc031qgy.1	-11484	ENSG00000199767	RNU6-78P	RNA, U6 small nuclear 78, pseudogene	uc031qgy.1;uc001rks.3	100873778;55196	-11484;45933
chr12	33740717	33742108	1392	*	Distal Intergenic	12	33528348	33592754	64407	2	341359	uc009zju.1	-147963	ENSG00000110975	SYT10	synaptotagmin 10	NA	NA	NA
chr12	34280220	34280890	671	*	Distal Intergenic	12	34175216	34181236	6021	1	84920	uc001rlm.3	105004	ENSG00000139133	ALG10	ALG10 alpha-1,2-glucosyltransferase	NA	NA	NA
chr12	39063158	39063819	662	*	Intron (uc001rlr.1/144402, intron 7 of 7)	12	39046002	39115024	69023	2	144402	uc001rlr.1	51205	ENSG00000139117	CPNE8	copine 8	uc001rlr.1;uc001rls.1	144402;144402	0;0
chr12	42470286	42471460	1175	*	Distal Intergenic	12	42475648	42538673	63026	2	283464	uc001rms.4	67213	ENSG00000151233	GXYLT1	glucoside xylosyltransferase 1	uc001rms.4;uc001rmt.4	283464;283464	67213;67213
chr12	47600684	47601546	863	*	Exon (uc001rpo.1/uc001rpo.1, exon 1 of 1)	12	47610005	47630443	20439	1	91523	uc001rpq.3	-8459	ENSG00000179715	PCED1B	PC-esterase domain containing 1B	uc001rpp.2;uc021qxh.1;uc001rpn.3;uc001rpq.3	100233209;100616486;91523;91523	8680;19089;0;-8459
chr12	49086891	49087996	1106	*	3' UTR	12	49046995	49076035	29041	2	54934	uc001rry.2	-10856	ENSG00000139620	KANSL2	KAT8 regulatory NSL complex subunit 2	uc001rsg.4;uc010slv.3;uc001rrw.2;uc001rrz.2;uc001rrx.2;uc001rry.2;uc001rsb.1;uc001rsc.1;uc001rsa.2;uc001rsd.4;uc009zkz.3	255411;255411;54934;54934;54934;54934;677793;677794;677815;904;904	-33222;-33222;-13275;-10883;-10856;-10856;-36326;-25515;-38578;0;0
chr12	51415230	51416000	771	*	Intron (uc001rxc.4/4891, intron 1 of 16)	12	51379775	51419924	40150	2	4891	uc001rxh.2	3924	ENSG00000110911	SLC11A2	solute carrier family 11 member 2	uc010smz.2;uc010sna.2;uc001rxm.3;uc001rxn.3;uc001rxo.3;uc001rxr.3;uc009zlw.3;uc001rxl.3;uc001rxt.3;uc001rxc.4;uc001rxd.4;uc001rxe.4;uc001rxf.3;uc001rxg.2;uc010smx.2;uc001rxh.2;uc001rxi.3;uc001rxj.2;uc010smy.2;uc001rxk.2;uc021qxx.1;uc001rxu.2	25875;25875;25875;25875;25875;25875;25875;25875;25875;4891;4891;4891;4891;4891;4891;4891;4891;4891;4891;4891;81566;81566	-26082;-26082;-26082;-26082;-26082;-26082;-26082;-26100;-26657;0;0;0;0;-26355;-12177;0;0;0;0;0;61437;61454
chr12	53055829	53056704	876	*	Distal Intergenic	12	53038342	53045959	7618	2	3849	uc001sat.3	-9870	ENSG00000172867	KRT2	keratin 2	uc001sas.3;uc001saw.3;uc009zmi.3;uc001sau.1;uc001sav.1;uc001sat.3	319101;374454;374454;3848;3848;3849	-43486;40543;40543;17487;17487;-9870
chr12	54689208	54690354	1147	*	Promoter (<=1kb)	12	54685891	54689542	3652	2	4778	uc009znk.4	0	ENSG00000123405	NFE2	nuclear factor, erythroid 2	uc001sfs.2;uc001sft.3;uc009znm.2;uc010sot.2;uc031qhp.1;uc001sfh.4;uc001sfj.4;uc001sfk.4;uc001sfl.3;uc001sfm.3;uc001sfn.3;uc001sfo.3;uc009znj.1;uc010sou.2;uc009znk.4;uc001sfq.4;uc001sfr.5;uc009znl.4	22818;22818;22818;22818;22818;23468;23468;23468;3178;3178;3178;3178;3178;442892;4778;4778;4778;4778	-28520;-28520;-28520;-28520;-28520;-35879;-35838;-15293;14720;14720;14720;14720;13629;-40646;0;0;0;0
chr12	54697937	54699139	1203	*	Distal Intergenic	12	54685891	54694821	8931	2	4778	uc009znl.4	-3116	ENSG00000123405	NFE2	nuclear factor, erythroid 2	uc001sfs.2;uc001sft.3;uc009znm.2;uc010sot.2;uc031qhp.1;uc001sfh.4;uc001sfj.4;uc001sfk.4;uc001sfl.3;uc001sfm.3;uc001sfn.3;uc001sfo.3;uc009znj.1;uc010sou.2;uc009znk.4;uc001sfq.4;uc001sfr.5;uc009znl.4	22818;22818;22818;22818;22818;23468;23468;23468;3178;3178;3178;3178;3178;442892;4778;4778;4778;4778	-19735;-19735;-19735;-19735;-19735;-44608;-44567;-24022;23449;23449;23449;23449;22358;-31861;0;0;0;0
chr12	56637397	56638165	769	*	Exon (uc001skm.4/283373, exon 25 of 28)	12	56647851	56650931	3081	2	283373	uc001skn.1	12766	ENSG00000139645	ANKRD52	ankyrin repeat domain 52	uc021qyz.1;uc001ske.2;uc001skf.2;uc001skg.2;uc010sqg.2;uc010sqh.2;uc001skr.1;uc001sks.1;uc001skt.1;uc010sql.1;uc010sqm.1;uc001skm.4;uc001skn.1;uc010sqi.2;uc010sqj.2;uc010sqk.2;uc001ski.3;uc001skk.3;uc001sko.4;uc001skp.4;uc001skq.4	10193;10193;10193;10193;10193;10193;1431;1431;1431;1431;1431;283373;283373;283375;283375;283375;79035;79035;93058;93058;93058	-21912;-21682;-21682;-21644;-21644;-21644;56010;56010;56010;56010;41710;0;12766;13577;13577;12896;19272;18890;-22477;-22902;-23301
chr12	57271626	57272465	840	*	Distal Intergenic	12	57316938	57328189	11252	2	121214	uc010sqw.2	55724	ENSG00000170426	SDR9C7	short chain dehydrogenase/reductase family 9C member 7	uc010sqw.2	121214	0
chr12	57325116	57325733	618	*	Intron (uc010sqw.2/121214, intron 1 of 3)	12	57316938	57328189	11252	2	121214	uc010sqw.2	2456	ENSG00000170426	SDR9C7	short chain dehydrogenase/reductase family 9C member 7	uc010sqw.2;uc001smi.4;uc009zpa.3	121214;8608;8608	0;25685;25685
chr12	93709433	93710843	1411	*	Intron (uc021rbu.1/643339, intron 2 of 4)	12	93397534	93771512	373979	2	643339	uc021rbu.1	60669	NA	LOC643339	uncharacterized LOC643339	uc021rbu.1	643339	0
chr12	101006207	101007164	958	*	Intron (uc001thu.3/283431, intron 6 of 9)	12	100987396	101018685	31290	1	283431	uc001thv.3	18811	ENSG00000139354	GAS2L3	growth arrest specific 2 like 3	uc001thu.3;uc009zty.3;uc001thv.3;uc001thp.2;uc001thq.2;uc001thr.2;uc010svj.2;uc010svk.2;uc001ths.2;uc001tht.2	283431;283431;283431;9971;9971;9971;9971;9971;9971;9971	0;0;0;138656;138656;138656;138656;138656;109069;109069
chr12	104860086	104862601	2516	*	Intron (uc001tky.3/50515, intron 1 of 2)	12	104850692	105155792	305101	1	50515	uc001tkz.3	9394	ENSG00000171310	CHST11	carbohydrate sulfotransferase 11	uc001tky.3;uc001tkz.3	50515;50515	0;0
chr12	104860086	104862601	2516	*	Intron (uc001tky.3/50515, intron 1 of 2)	12	104850692	105155792	305101	1	50515	uc001tkz.3	9394	ENSG00000171310	CHST11	carbohydrate sulfotransferase 11	uc001tky.3;uc001tkz.3	50515;50515	0;0
chr12	108512868	108513454	587	*	Distal Intergenic	12	108523511	108644313	120803	1	9671	uc001tms.3	-10057	ENSG00000075035	WSCD2	WSC domain containing 2	uc001tms.3;uc001tmt.3	9671;9671	-10057;-12103
chr12	109027504	109028850	1347	*	Promoter (<=1kb)	12	109015680	109027670	11991	2	6404	uc001tni.3	0	ENSG00000110876	SELPLG	selectin P ligand	uc009zva.4;uc031qjk.1;uc001tnj.4;uc010sxf.3;uc001tng.3;uc010sxe.2;uc001tni.3;uc001tnh.4	23603;23603;23603;23603;338773;6404;6404;6404	0;0;0;0;-35610;-1650;0;0
chr12	109085151	109086572	1422	*	Intron (uc009zva.4/23603, intron 2 of 10)	12	109038885	109096774	57890	2	23603	uc009zva.4	10202	ENSG00000110880	CORO1C	coronin 1C	uc009zva.4;uc031qjk.1;uc001tnj.4;uc010sxf.3	23603;23603;23603;23603	0;0;0;0
chr12	109085151	109086572	1422	*	Intron (uc009zva.4/23603, intron 2 of 10)	12	109038885	109096774	57890	2	23603	uc009zva.4	10202	ENSG00000110880	CORO1C	coronin 1C	uc009zva.4;uc031qjk.1;uc001tnj.4;uc010sxf.3	23603;23603;23603;23603	0;0;0;0
chr12	111842664	111843683	1020	*	Promoter (<=1kb)	12	111843752	111889427	45676	1	10019	uc001tse.3	-69	ENSG00000111252	SH2B3	SH2B adaptor protein 3	uc001tse.3;uc010syf.2;uc001tsf.3;uc010syg.2;uc001tsc.3;uc001tsd.4;uc009zvu.3;uc021rdy.1;uc001tsh.3;uc001tsi.3;uc001tsj.3;uc001tsk.3;uc001tsl.1	10019;10019;10019;10019;144717;144717;144717;144717;6311;6311;6311;6311;6311	-69;-12230;-12240;-28983;-41148;-35739;-35739;-35739;193794;193794;193797;193797;64962
chr12	112430899	112433107	2209	*	Intron (uc001ttc.2/89894, intron 3 of 12)	12	112369087	112451023	81937	2	89894	uc001ttc.2	17916	ENSG00000198270	TMEM116	transmembrane protein 116	uc001ttk.1;uc001ttl.1;uc001ttm.3;uc001ttn.4;uc009zvz.2;uc009zwa.2;uc001ttc.2;uc001ttd.2;uc001tte.2;uc001ttf.2;uc001tti.2	10961;10961;80018;80018;80018;80018;89894;89894;89894;89894;89894	-18045;-18045;113528;113528;113528;113528;0;0;0;0;0
chr12	112430899	112433107	2209	*	Intron (uc001ttc.2/89894, intron 3 of 12)	12	112369087	112451023	81937	2	89894	uc001ttc.2	17916	ENSG00000198270	TMEM116	transmembrane protein 116	uc001ttk.1;uc001ttl.1;uc001ttm.3;uc001ttn.4;uc009zvz.2;uc009zwa.2;uc001ttc.2;uc001ttd.2;uc001tte.2;uc001ttf.2;uc001tti.2	10961;10961;80018;80018;80018;80018;89894;89894;89894;89894;89894	-18045;-18045;113528;113528;113528;113528;0;0;0;0;0
chr12	116996951	116997845	895	*	Promoter (<=1kb)	12	116997186	117014425	17240	1	643246	uc009zwk.1	0	ENSG00000258102	MAP1LC3B2	microtubule associated protein 1 light chain 3 beta 2	uc001tvx.1;uc001tvy.3;uc009zwk.1	100287569;100287569;643246	25724;25711;0
chr12	117479764	117481170	1407	*	Exon (uc001twh.3/54997, exon 7 of 8)	12	117476728	117537251	60524	2	54997	uc001twh.3	56081	ENSG00000088992	TESC	tescalcin	uc001twf.1;uc001twg.1;uc001twh.3;uc001twi.3;uc021rem.1	26259;26259;54997;54997;54997	131003;131003;0;0;0
chr12	120977893	120978825	933	*	Intron (uc001typ.4/9921, intron 1 of 16)	12	120984208	121015397	31190	1	9921	uc001tyq.4	-5383	ENSG00000022840	RNF10	ring finger protein 10	uc001tyk.2;uc001tys.3;uc001tyt.3;uc001tyn.3;uc010szj.2;uc001tyj.3;uc001tyl.3;uc001tym.3;uc001typ.4;uc010szk.2;uc001tyq.4	100506668;51367;51367;84274;84274;8655;8655;8655;9921;9921;9921	-44144;40376;40376;-10929;-10929;70233;44034;44034;0;0;-5383
chr12	122308901	122309909	1009	*	Intron (uc001ubk.3/3242, intron 1 of 15)	12	122277433	122296769	19337	2	3242	uc001ubj.3	-12132	ENSG00000158104	HPD	4-hydroxyphenylpyruvate dioxygenase	uc021rfh.1;uc009zxk.3;uc021rfg.1;uc001ubi.3;uc001ubj.3;uc001ubk.3;uc001ubl.4;uc009zxj.4;uc031qjw.1;uc031qjx.1	144406;144406;23067;23067;3242;3242;5715;5715;5715;5715	-46554;0;66263;66263;-12132;0;-16728;-16728;-16728;-16728
chr12	122441788	122442708	921	*	3' UTR	12	122459861	122499950	40090	1	605	uc001ubo.3	-17153	ENSG00000110987	BCL7A	BAF chromatin remodeling complex subunit BCL7A	uc021rfh.1;uc009zxk.3;uc001ubo.3;uc001ubp.3	144406;144406;605;605	85325;0;-17153;-17153
chr12	122581952	122583132	1181	*	Intron (uc001ubq.3/22877, intron 1 of 16)	12	122612430	122618711	6282	1	22877	uc001ubr.3	-29298	ENSG00000175727	MLXIP	MLX interacting protein	uc001ubq.3;uc001ubr.3;uc001ubs.1;uc001ubt.3	22877;22877;22877;22877	0;-29298;-32259;-34698
chr12	122973432	122974187	756	*	5' UTR	12	122956146	122967249	11104	2	55596	uc001ucm.3	-6183	ENSG00000033030	ZCCHC8	zinc finger CCHC-type containing 8	uc001ucl.3;uc001ucm.3;uc009zxp.3;uc009zxq.3;uc001ucn.3;uc001uco.3;uc001ucp.3;uc001ucr.3;uc001ucs.4;uc001uct.3;uc021rfm.1;uc001ucv.3;uc010taf.2	55596;55596;55596;55596;55596;65117;65117;65117;65117;65117;65117;9735;9735	-10352;-6183;0;0;0;33192;37373;37373;37373;37373;37373;-37622;-37622
chr12	124203483	124204796	1314	*	Intron (uc001ufq.1/23545, intron 2 of 8)	12	124196865	124246301	49437	1	23545	uc001ufr.3	6618	ENSG00000185344	ATP6V0A2	ATPase H+ transporting V0 subunit a2	uc001uft.4;uc001ufq.1;uc001ufr.3;uc001ufp.3;uc009zya.3	196385;23545;23545;79867;79867	-42246;0;0;47823;47823
chr12	125320287	125320601	315	*	Intron (uc001ugm.4/949, intron 1 of 12)	12	125262174	125348519	86346	2	949	uc001ugm.4	27918	ENSG00000073060	SCARB1	scavenger receptor class B member 1	uc001ugm.4;uc001ugn.4;uc001ugo.4;uc010tbd.2;uc031qke.1;uc001ugp.3	949;949;949;949;949;949	0;0;0;0;0;0
chr12	131317189	131318018	830	*	Intron (uc001uio.4/2054, intron 1 of 10)	12	131274145	131323819	49675	2	2054	uc001uio.4	5801	ENSG00000111450	STX2	syntaxin 2	uc001uio.4;uc001uip.4;uc010tbj.3;uc001uir.3;uc010tbk.2;uc010tbl.2;uc001uis.3	2054;2054;2054;5901;5901;5901;5901	0;0;0;-38599;-38599;-38599;-38765
chr12	133047359	133048503	1145	*	Distal Intergenic	12	133067157	133161773	94617	1	57666	uc001ukf.3	-18654	ENSG00000112787	FBRSL1	fibrosin like 1	uc001ukf.3	57666	-18654
chr13	22096203	22097779	1577	*	Exon (uc001uof.3/221154, exon 5 of 12)	13	22066828	22088568	21741	2	221154	uc010tct.2	-7635	ENSG00000165487	MICU2	mitochondrial calcium uptake 2	uc010tct.2;uc001uof.3	221154;221154	-7635;0
chr13	25616557	25617092	536	*	Distal Intergenic	13	25670276	25672704	2429	1	5042	uc001upy.3	-53184	ENSG00000151846	PABPC3	poly(A) binding protein cytoplasmic 3	NA	NA	NA
chr13	28982154	28983266	1113	*	Intron (uc001usb.3/2321, intron 10 of 29)	13	28963933	28980031	16099	2	2321	uc010aat.1	-2123	ENSG00000102755	FLT1	fms related receptor tyrosine kinase 1	uc001usb.3;uc010aar.1;uc001usc.3;uc010aas.1;uc010aat.1;uc010tdp.1	2321;2321;2321;2321;2321;2321	0;0;0;-2123;-2123;0
chr13	52495766	52497175	1410	*	Distal Intergenic	13	52506806	52534146	27341	2	540	uc001vfv.2	36971	ENSG00000123191	ATP7B	ATPase copper transporting beta	uc001vfv.2;uc010tgs.1;uc001vfw.2;uc001vfx.2;uc001vfy.2;uc010adv.2;uc010tgt.1;uc010tgu.1;uc010tgv.1;uc010tgw.1	540;540;540;540;540;540;540;540;540;540	36971;38874;88455;88455;88455;88455;88455;88455;88455;55952
chr13	91243781	91244642	862	*	Distal Intergenic	13	91543208	91578851	35644	2	144776	uc010tid.1	334209	ENSG00000231674	LINC00410	long intergenic non-protein coding RNA 410	NA	NA	NA
chr13	92063312	92064670	1359	*	Intron (uc010tif.2/2262, intron 1 of 7)	13	92050935	93519487	1468553	1	2262	uc010tif.2	12377	ENSG00000179399	GPC5	glypican 5	uc010tif.2	2262	0
chr13	95937780	95938483	704	*	Intron (uc001vmd.4/10257, intron 1 of 30)	13	95672083	95953687	281605	2	10257	uc001vmd.4	15204	ENSG00000125257	ABCC4	ATP binding cassette subfamily C member 4 (PEL blood group)	uc001vmd.4;uc010afk.3;uc001vme.2;uc010tih.1;uc001vmf.2;uc010afl.1;uc010afm.1	10257;10257;10257;10257;10257;10257;10257	0;0;0;0;0;0;0
chr13	98757956	98758883	928	*	Distal Intergenic	13	98794816	99102023	307208	1	10160	uc001vnh.3	-35933	ENSG00000152767	FARP1	FERM, ARH/RhoGEF and pleckstrin domain protein 1	uc001vnh.3;uc001vni.3;uc001vnj.3	10160;10160;10160	-35933;-36551;-36551
chr13	99705265	99706506	1242	*	Intron (uc001vnt.2/23348, intron 1 of 55)	13	99445741	99738660	292920	2	23348	uc001vnt.2	32154	ENSG00000088387	DOCK9	dedicator of cytokinesis 9	uc001vnt.2;uc001vnv.1;uc010tir.1;uc010tit.1	23348;23348;23348;23348	0;-37292;0;0
chr13	101946938	101947851	914	*	Intron (uc001vox.1/259232, intron 7 of 43)	13	101706130	102068813	362684	2	259232	uc001vox.1	120962	ENSG00000102452	NALCN	sodium leak channel, non-selective	uc001vox.1;uc001voy.3;uc001voz.2;uc001vpa.2	259232;259232;259232;259232	0;0;0;0
chr13	102264961	102265707	747	*	Intron (uc001vpb.4/9358, intron 7 of 10)	13	102142303	102368796	226494	1	9358	uc031qnc.1	122658	ENSG00000198542	ITGBL1	integrin subunit beta like 1	uc001vpb.4;uc010agb.4;uc001vpc.5;uc031qnc.1	9358;9358;9358;9358	0;0;0;0
chr13	105764670	105765772	1103	*	Distal Intergenic	13	106118216	106143383	25168	1	267012	uc001vpz.3	-352444	ENSG00000182346	DAOA	D-amino acid oxidase activator	NA	NA	NA
chr14	20944889	20946186	1298	*	Promoter (1-2kb)	14	20942920	20946165	3246	1	4860	uc021rns.1	1969	ENSG00000198805	PNP	purine nucleoside phosphorylase	uc010tli.2;uc001vxg.3;uc001vxh.3;uc001vxi.3;uc021rnr.1;uc010tlj.2;uc010ahm.2;uc010ahn.3;uc001vxo.4;uc021rns.1;uc001vxf.3;uc001vxk.2;uc001vxl.2	123103;328;328;328;328;338879;4860;4860;4860;4860;55644;90809;90809	-41088;21599;21599;21599;21599;-32445;7351;7351;0;0;-21622;-15252;-15252
chr14	21267140	21268434	1295	*	Distal Intergenic	14	21269515	21270558	1044	2	6035	uc001vyf.3	2124	ENSG00000129538	RNASE1	ribonuclease A family member 1, pancreatic	uc001vyf.3;uc001vyg.3;uc001vyh.3;uc001vyi.3;uc001vye.4;uc001vyd.3	6035;6035;6035;6035;6039;64184	2124;2602;2602;2602;17930;30554
chr14	23623498	23624129	632	*	Promoter (<=1kb)	14	23594504	23623659	29156	2	23428	uc001wix.4	0	ENSG00000092068	SLC7A8	solute carrier family 7 member 8	uc001wiv.2;uc001wiw.3;uc001wix.4;uc010tnk.3;uc001wiy.4;uc010tnl.3;uc001wiz.4;uc010akj.4	1053;23428;23428;23428;23428;23428;23428;23428	-34678;-24146;0;0;0;0;0;0
chr14	24591676	24593060	1385	*	3' UTR	14	24584494	24594451	9958	1	80344	uc001wmb.4	7182	ENSG00000100897	DCAF11	DDB1 and CUL4 associated factor 11	uc001wmq.3;uc010alj.3;uc001wmf.2;uc021rrk.1;uc001wlo.3;uc001wlp.3;uc001wlq.3;uc001wmi.3;uc001wls.3;uc001wlt.3;uc010tnw.2;uc010ald.2;uc010ale.2;uc001wlu.4;uc010tnx.2;uc001wml.1;uc001wmm.1;uc001wmn.1;uc010alg.1;uc001wmo.1;uc001wmp.3;uc010alh.1;uc001wmg.3;uc001wmh.3;uc001wmj.3;uc001wlv.3;uc001wlw.3;uc001wly.3;uc001wlz.3;uc001wmc.3;uc010tny.2;uc001wma.4;uc001wmb.4;uc010tnv.2;uc001wlm.3;uc001wll.3;uc0…	10379;10379;161247;4901;4901;4901;4901;51016;5106;5106;5106;5106;5106;5106;5106;55072;55072;55072;55072;55072;55072;55072;5720;5720;5721;80344;80344;80344;80344;80344;80344;80344;80344;9362;9362;9362;9985;9985	-36669;-39115;-7615;-40521;-37844;-27337;-7453;17737;28193;28193;28193;28154;28154;28154;28154;-23036;-23599;-23599;-24125;-27150;-27280;-31752;-12318;-12318;22795;0;0;0;0;0;0;0;0;51630;51518;50940;-48174;-48174
chr14	24591676	24593060	1385	*	3' UTR	14	24584494	24594451	9958	1	80344	uc001wmb.4	7182	ENSG00000100897	DCAF11	DDB1 and CUL4 associated factor 11	uc001wmq.3;uc010alj.3;uc001wmf.2;uc021rrk.1;uc001wlo.3;uc001wlp.3;uc001wlq.3;uc001wmi.3;uc001wls.3;uc001wlt.3;uc010tnw.2;uc010ald.2;uc010ale.2;uc001wlu.4;uc010tnx.2;uc001wml.1;uc001wmm.1;uc001wmn.1;uc010alg.1;uc001wmo.1;uc001wmp.3;uc010alh.1;uc001wmg.3;uc001wmh.3;uc001wmj.3;uc001wlv.3;uc001wlw.3;uc001wly.3;uc001wlz.3;uc001wmc.3;uc010tny.2;uc001wma.4;uc001wmb.4;uc010tnv.2;uc001wlm.3;uc001wll.3;uc0…	10379;10379;161247;4901;4901;4901;4901;51016;5106;5106;5106;5106;5106;5106;5106;55072;55072;55072;55072;55072;55072;55072;5720;5720;5721;80344;80344;80344;80344;80344;80344;80344;80344;9362;9362;9362;9985;9985	-36669;-39115;-7615;-40521;-37844;-27337;-7453;17737;28193;28193;28193;28154;28154;28154;28154;-23036;-23599;-23599;-24125;-27150;-27280;-31752;-12318;-12318;22795;0;0;0;0;0;0;0;0;51630;51518;50940;-48174;-48174
chr14	24591676	24593060	1385	*	3' UTR	14	24584494	24594451	9958	1	80344	uc001wmb.4	7182	ENSG00000100897	DCAF11	DDB1 and CUL4 associated factor 11	uc001wmq.3;uc010alj.3;uc001wmf.2;uc021rrk.1;uc001wlo.3;uc001wlp.3;uc001wlq.3;uc001wmi.3;uc001wls.3;uc001wlt.3;uc010tnw.2;uc010ald.2;uc010ale.2;uc001wlu.4;uc010tnx.2;uc001wml.1;uc001wmm.1;uc001wmn.1;uc010alg.1;uc001wmo.1;uc001wmp.3;uc010alh.1;uc001wmg.3;uc001wmh.3;uc001wmj.3;uc001wlv.3;uc001wlw.3;uc001wly.3;uc001wlz.3;uc001wmc.3;uc010tny.2;uc001wma.4;uc001wmb.4;uc010tnv.2;uc001wlm.3;uc001wll.3;uc0…	10379;10379;161247;4901;4901;4901;4901;51016;5106;5106;5106;5106;5106;5106;5106;55072;55072;55072;55072;55072;55072;55072;5720;5720;5721;80344;80344;80344;80344;80344;80344;80344;80344;9362;9362;9362;9985;9985	-36669;-39115;-7615;-40521;-37844;-27337;-7453;17737;28193;28193;28193;28154;28154;28154;28154;-23036;-23599;-23599;-24125;-27150;-27280;-31752;-12318;-12318;22795;0;0;0;0;0;0;0;0;51630;51518;50940;-48174;-48174
chr14	24591676	24593060	1385	*	3' UTR	14	24584494	24594451	9958	1	80344	uc001wmb.4	7182	ENSG00000100897	DCAF11	DDB1 and CUL4 associated factor 11	uc001wmq.3;uc010alj.3;uc001wmf.2;uc021rrk.1;uc001wlo.3;uc001wlp.3;uc001wlq.3;uc001wmi.3;uc001wls.3;uc001wlt.3;uc010tnw.2;uc010ald.2;uc010ale.2;uc001wlu.4;uc010tnx.2;uc001wml.1;uc001wmm.1;uc001wmn.1;uc010alg.1;uc001wmo.1;uc001wmp.3;uc010alh.1;uc001wmg.3;uc001wmh.3;uc001wmj.3;uc001wlv.3;uc001wlw.3;uc001wly.3;uc001wlz.3;uc001wmc.3;uc010tny.2;uc001wma.4;uc001wmb.4;uc010tnv.2;uc001wlm.3;uc001wll.3;uc0…	10379;10379;161247;4901;4901;4901;4901;51016;5106;5106;5106;5106;5106;5106;5106;55072;55072;55072;55072;55072;55072;55072;5720;5720;5721;80344;80344;80344;80344;80344;80344;80344;80344;9362;9362;9362;9985;9985	-36669;-39115;-7615;-40521;-37844;-27337;-7453;17737;28193;28193;28193;28154;28154;28154;28154;-23036;-23599;-23599;-24125;-27150;-27280;-31752;-12318;-12318;22795;0;0;0;0;0;0;0;0;51630;51518;50940;-48174;-48174
chr14	37641293	37642970	1678	*	Promoter (<=1kb)	14	37147126	37641865	494740	2	89874	uc001wtz.2	0	ENSG00000183032	SLC25A21	solute carrier family 25 member 21	uc021rsh.2;uc010amr.2;uc001wub.4;uc001wuc.3;uc001wud.3;uc001wue.3;uc010ams.3;uc010amt.3;uc001wtz.2;uc021rsf.1	100129794;145282;145282;145282;145282;145282;145282;145282;89874;89874	0;-24148;-24148;-24148;-24148;-24148;-24148;-24148;0;0
chr14	37641293	37642970	1678	*	Promoter (<=1kb)	14	37147126	37641865	494740	2	89874	uc001wtz.2	0	ENSG00000183032	SLC25A21	solute carrier family 25 member 21	uc021rsh.2;uc010amr.2;uc001wub.4;uc001wuc.3;uc001wud.3;uc001wue.3;uc010ams.3;uc010amt.3;uc001wtz.2;uc021rsf.1	100129794;145282;145282;145282;145282;145282;145282;145282;89874;89874	0;-24148;-24148;-24148;-24148;-24148;-24148;-24148;0;0
chr14	46254137	46255161	1025	*	Distal Intergenic	14	46533362	46971104	437743	1	100506412	uc031qoi.1	-278201	ENSG00000258700	LINC00871	long intergenic non-protein coding RNA 871	NA	NA	NA
chr14	50469836	50470704	869	*	Intron (uc001wxi.1/283551, intron 1 of 3)	14	50448430	50474238	25809	2	283551	uc001wxi.1	3534	ENSG00000214900	LINC01588	long intergenic non-protein coding RNA 1588	uc031qom.1;uc001wxl.3;uc001wxi.1	100506499;100506499;283551	35898;37243;0
chr14	55850280	55851133	854	*	Intron (uc001xbv.3/uc001xbv.3, intron 4 of 5)	14	55833109	55858020	24912	2	22863	uc001xbw.2	6887	ENSG00000126775	ATG14	autophagy related 14	uc001xbw.2;uc001xbx.2;uc001xby.3;uc001xbu.3;uc010aoo.3	22863;22863;387332;55030;55030	0;0;56130;112259;111408
chr14	65311351	65312533	1183	*	Intron (uc001xhs.3/6710, intron 1 of 35)	14	65233117	65289863	56747	2	6710	uc001xht.3	-21488	ENSG00000070182	SPTB	spectrin beta, erythrocytic	uc001xhr.3;uc001xhs.3;uc001xht.3;uc001xhu.3	6710;6710;6710;6710	-21488;0;-21488;0
chr14	67885134	67886227	1094	*	Distal Intergenic	14	67853700	67878828	25129	2	26499	uc001xjh.1	-6306	ENSG00000100558	PLEK2	pleckstrin 2	uc001xjj.1;uc001xjg.3;uc001xjh.1	161145;1965;26499	95975;58100;-6306
chr14	68761808	68762788	981	*	Intron (uc001xkd.3/5890, intron 8 of 10)	14	68286496	69196935	910440	1	5890	uc001xkg.2	475312	ENSG00000182185	RAD51B	RAD51 paralog B	uc001xkd.3;uc010aqr.3;uc001xke.3;uc001xkf.2;uc001xkg.2	5890;5890;5890;5890;5890	0;0;0;0;0
chr14	70168257	70169243	987	*	Intron (uc001xlk.3/9766, intron 2 of 5)	14	70193619	70238722	45104	1	6430	uc001xll.3	-24376	ENSG00000100650	SRSF5	serine and arginine rich splicing factor 5	uc001xll.3;uc001xlk.3;uc010aqz.3	6430;9766;9766	-24376;0;0
chr14	70703883	70705216	1334	*	Distal Intergenic	14	70712470	70714518	2049	2	145241	uc010ttg.2	9302	ENSG00000293335	ADAM21P1	ADAM metallopeptidase domain 21 pseudogene 1	uc010ttg.2;uc001xlw.3;uc001xlx.3;uc001xly.3;uc001xlz.3;uc010ara.3	145241;6547;6547;6547;6547;6547	9302;-48096;-48096;-48096;-48096;-48096
chr14	74207990	74208780	791	*	Promoter (1-2kb)	14	74186008	74206958	20951	2	91748	uc010arw.2	-1032	ENSG00000156030	MIDEAS	mitotic deacetylase associated SANT domain protein	uc021rwi.1;uc001xoq.4;uc010aru.3;uc010arv.3;uc001xos.3;uc001xot.3;uc001xou.3;uc010tud.1;uc010arw.2;uc001xor.1	100616158;83544;83544;83544;91748;91748;91748;91748;91748;9240	-16670;96412;96412;96412;-12111;0;0;-1032;-1032;-26862
chr14	77506378	77507272	895	*	Distal Intergenic	14	77490886	77495042	4157	2	64207	uc001xsy.4	-11336	ENSG00000119669	IRF2BPL	interferon regulatory factor 2 binding protein like	uc001xsy.4	64207	-11336
chr14	77646970	77648124	1155	*	Promoter (<=1kb)	14	77648102	77725838	77737	1	57156	uc001xtf.2	0	ENSG00000165548	TMEM63C	transmembrane protein 63C	uc010asp.3;uc001xtf.2;uc010asq.1	283576;57156;57156	-38836;0;0
chr14	78292095	78293021	927	*	Intron (uc010tvo.1/57143, intron 3 of 8)	14	78266426	78400297	133872	1	57143	uc001xuj.3	25669	ENSG00000063761	ADCK1	aarF domain containing kinase 1	uc010tvo.1;uc001xui.3;uc001xuj.3;uc001xuk.1	57143;57143;57143;57143	0;0;0;-32377
chr14	78785614	78787161	1548	*	Intron (uc001xum.2/9369, intron 4 of 20)	14	78870074	80334633	1464560	1	9369	uc001xun.4	-82913	ENSG00000021645	NRXN3	neurexin 3	uc001xum.2	9369	0
chr14	81889765	81890314	550	*	Intron (uc010tvu.3/85439, intron 1 of 5)	14	81726994	81893556	166563	2	85439	uc010tvu.3	3242	ENSG00000140022	STON2	stonin 2	uc010tvv.2;uc010tvu.3;uc001xvk.2;uc010atc.1	6400;85439;85439;85439	109891;0;0;-5168
chr14	93016088	93016709	622	*	Intron (uc001yap.3/79890, intron 1 of 9)	14	93042579	93155334	112756	1	79890	uc001yaq.3	-25870	ENSG00000100599	RIN3	Ras and Rab interactor 3	uc001yai.3;uc010twm.2;uc001yak.3;uc010auj.3;uc010twn.2;uc001yan.3;uc001yap.3;uc010auk.3;uc001yaq.3	123041;123041;123041;123041;123041;123041;79890;79890;79890	227163;226551;225936;110409;106379;96978;0;0;-25870
chr14	96010878	96011838	961	*	3' UTR	14	96001323	96011055	9733	1	51218	uc001yem.1	9555	ENSG00000182512	GLRX5	glutaredoxin 5	uc001yek.3;uc001yel.3;uc001yem.1	283596;283596;51218	-9669;-9669;0
chr14	97383270	97384760	1491	*	Distal Intergenic	14	97263684	97347951	84268	1	7443	uc001yft.3	119586	ENSG00000100749	VRK1	VRK serine/threonine kinase 1	uc001yft.3	7443	119586
chr14	100608388	100609726	1339	*	Exon (uc001ygw.1/uc001ygw.1, exon 1 of 1)	14	100612753	100626012	13260	2	123099	uc001ygx.2	16286	ENSG00000168350	DEGS2	delta 4-desaturase, sphingolipid 2	uc001ygx.2;uc001ygt.3;uc001ygv.2;uc001ygu.3	123099;51466;51466;51466	16286;0;122669;0
chr14	100680940	100681533	594	*	Distal Intergenic	14	100705102	100745371	40270	1	7528	uc001ygy.2	-23569	ENSG00000100811	YY1	YY1 transcription factor	uc001ygy.2	7528	-23569
chr14	102970170	102971421	1252	*	Distal Intergenic	14	102973198	102975154	1957	2	122416	uc001ylx.1	3733	ENSG00000156381	ANKRD9	ankyrin repeat domain 9	uc021sed.1;uc001ylx.1;uc001ylz.1;uc001yma.1;uc010awl.3;uc001ylw.2;uc010txx.2	100422954;122416;122416;122416;9895;9895;9895	-34560;3733;4707;4707;140870;140870;140870
chr14	103844127	103844966	840	*	Distal Intergenic	14	103851701	103970166	118466	1	4140	uc001ymw.4	-6735	ENSG00000075413	MARK3	microtubule affinity regulating kinase 3	uc001ymq.4;uc001ymr.4;uc001ymt.4;uc001ymu.3;uc001ymw.4;uc001ymx.4;uc001ymy.4;uc001ymz.4;uc001yna.4;uc010awp.3;uc001ymv.1	1983;1983;1983;1983;4140;4140;4140;4140;4140;4140;677811	43788;43788;42929;42841;-6735;-6735;-6735;-6735;-6735;-6735;39941
chr14	104196805	104197480	676	*	Promoter (<=1kb)	14	104197768	104200005	2238	1	79038	uc001yoe.3	-288	ENSG00000100711	ZFYVE21	zinc finger FYVE-type containing 21	uc010awv.1;uc001yof.1;uc001yog.1;uc010tyd.1;uc010tye.1;uc001ynm.1;uc001yno.3;uc010tyf.2;uc021seh.1;uc001ynp.1;uc001ynq.1;uc001ynr.1;uc010awu.1;uc001yns.3;uc001ynx.4;uc001yny.4;uc001ynz.4;uc001yoa.4;uc001yoc.3;uc001yod.3;uc001yoe.3	23368;23368;23368;3831;3831;3831;3831;3831;3831;3831;3831;3831;3831;3831;7517;7517;7517;7517;79038;79038;79038	15410;116447;115742;167506;101280;101280;101280;101280;54779;54779;54779;54779;54779;54779;-14982;-14982;-14982;-14982;0;0;-288
chr14	104624784	104625971	1188	*	Intron (uc001yos.4/26153, intron 4 of 14)	14	104605060	104647235	42176	1	26153	uc001yos.4	19724	ENSG00000066735	KIF26A	kinesin family member 26A	uc021sej.1;uc001yos.4;uc001yoq.2;uc001yor.2;uc010tyg.2	100616173;26153;374569;374569;406986	-40944;0;72761;72761;41042
chr14	105048795	105049424	630	*	Intron (uc010tyh.1/400258, intron 1 of 4)	14	105046056	105056183	10128	1	400258	uc001yow.1	2739	ENSG00000184601	C14orf180	chromosome 14 open reading frame 180	uc001yox.1;uc010tyh.1;uc001yow.1;uc010awy.1	388021;400258;400258;400258	21673;0;0;-3328
chr14	105161213	105161788	576	*	Intron (uc001yoy.4/64423, intron 1 of 4)	14	105155943	105185947	30005	1	64423	uc001ypc.2	5270	ENSG00000203485	INF2	inverted formin 2	uc021sek.1;uc001ypd.3;uc001ype.3;uc001ypf.3;uc001yoy.4;uc001ypb.2;uc001ypc.2;uc010awz.1	100616300;122622;122622;122622;64423;64423;64423;64423	-17127;-28746;-34440;-34440;0;0;0;-11802
chr14	105166811	105167560	750	*	Intron (uc001yoy.4/64423, intron 1 of 4)	14	105173590	105185947	12358	1	64423	uc010awz.1	-6030	ENSG00000203485	INF2	inverted formin 2	uc021sek.1;uc001ypd.3;uc001ype.3;uc001ypf.3;uc001yoy.4;uc001ypb.2;uc001ypc.2;uc010awz.1	100616300;122622;122622;122622;64423;64423;64423;64423	-22725;-22974;-28668;-28668;0;0;0;-6030
chr14	105541605	105542112	508	*	Distal Intergenic	14	105521724	105531754	10031	2	29933	uc010axe.1	-9851	ENSG00000183484	GPR132	G protein-coupled receptor 132	uc001yqc.3;uc001yqd.3;uc001yqe.3;uc010axe.1	29933;29933;29933;29933	-19102;-9851;-9851;-9851
chr15	22698053	22698328	276	*	Intron (uc001yuj.2/uc001yuj.2, intron 4 of 12)	15	22702285	22714634	12350	2	100132979	uc010axw.2	16306	ENSG00000290359	GOLGA8DP	golgin A8 family member D, pseudogene	uc010axw.2;uc010axx.2;uc021sfh.1;uc010tzx.1	100132979;100132979;100616223;283767	16306;17400;-22812;-37918
chr15	28861801	28862421	621	*	Distal Intergenic	15	28896567	28902471	5905	1	440248	uc010uan.1	-34146	ENSG00000291082	HERC2P9	HERC2 pseudogene 9	uc010uan.1;uc010azc.3;uc010uao.1	440248;440248;440248	-34146;-36999;-37998
chr15	31548477	31549811	1335	*	Distal Intergenic	15	31514971	31523050	8080	2	283710	uc021sib.1	-25427	ENSG00000259772	LINC03034	long intergenic non-protein coding RNA 3034	uc021sib.1	283710	-25427
chr15	31558136	31558825	690	*	Distal Intergenic	15	31514971	31523050	8080	2	283710	uc021sib.1	-35086	ENSG00000259772	LINC03034	long intergenic non-protein coding RNA 3034	uc021sib.1	283710	-35086
chr15	31656316	31657290	975	*	Intron (uc001zfo.3/51621, intron 1 of 1)	15	31619083	31670102	51020	1	51621	uc001zfo.3	37233	ENSG00000169926	KLF13	KLF transcription factor 13	uc001zfo.3	51621	0
chr15	31657530	31658455	926	*	Intron (uc001zfo.3/51621, intron 1 of 1)	15	31619083	31670102	51020	1	51621	uc001zfo.3	38447	ENSG00000169926	KLF13	KLF transcription factor 13	uc001zfo.3	51621	0
chr15	41037689	41038799	1111	*	Intron (uc001zmo.1/55177, intron 4 of 12)	15	41028086	41047447	19362	2	55177	uc001zmo.1	8648	ENSG00000137824	RMDN3	regulator of microtubule dynamics 3	uc001zmr.1;uc010ucr.1;uc001zmo.1;uc001zmp.1;uc001zmq.1;uc001zms.2;uc010bbz.2;uc010bca.2;uc010bcb.2;uc001zmi.4;uc010bbw.3;uc010bbx.3;uc001zml.4;uc001zmm.1;uc001zmn.1;uc010bby.3	2644;2644;55177;55177;55177;55192;55192;55192;55192;5888;5888;5888;5888;5888;5888;643338	-17486;-17486;0;0;0;60877;60877;60877;60877;50362;50362;50362;50311;44427;44427;-23360
chr15	43512616	43514136	1521	*	Promoter (<=1kb)	15	43489426	43513323	23898	2	2038	uc001zra.4	0	ENSG00000166947	EPB42	erythrocyte membrane protein band 4.2	uc001zqz.4;uc001zra.4;uc001zrb.4;uc010udm.2;uc021sjs.1;uc001zqv.3;uc010bdb.3;uc010udl.2;uc021sjt.1;uc021sju.1;uc031qrn.1;uc001zqy.3;uc001zqr.3;uc010bda.3;uc001zrc.2;uc001zrd.2;uc001zre.2	2038;2038;2038;2038;23582;23582;23582;23582;23582;23582;23582;23582;80021;80021;9333;9333;9333	-10819;0;0;0;35150;35150;35150;35150;35150;35150;35150;34598;86894;86161;17805;44919;44919
chr15	45340481	45342052	1572	*	Intron (uc010uel.2/6652, intron 3 of 6)	15	45315302	45367287	51986	1	6652	uc010bdz.3	25179	ENSG00000140263	SORD	sorbitol dehydrogenase	uc001zun.3;uc010bea.3;uc010uel.2;uc001zul.4;uc010bdz.3	50506;50506;6652;6652;6652	64307;64307;0;0;0
chr15	50552499	50553942	1444	*	Intron (uc001zxz.3/3067, intron 2 of 11)	15	50534146	50558162	24017	2	3067	uc001zxz.3	4220	ENSG00000140287	HDC	histidine decarboxylase	uc001zxw.3;uc010bes.3;uc001zxx.3;uc001zya.3;uc001zyb.3;uc010ufg.2;uc001zyc.3;uc001zyd.3;uc001zye.3;uc001zyf.3;uc001zxy.3;uc001zxz.3;uc010uff.2;uc010bet.2;uc010beu.2	11001;11001;11001;2553;2553;2553;2553;2553;2553;2553;3067;3067;3067;3067;3067	78106;78106;69301;93663;93663;93663;93663;93663;93663;93663;-6997;0;0;0;0
chr15	51477213	51478088	876	*	Distal Intergenic	15	51507900	51510745	2846	2	1588	uc001zzc.1	32657	ENSG00000137869	CYP19A1	cytochrome P450 family 19 subfamily A member 1	uc001zyz.4;uc001zza.4;uc001zzb.2;uc001zzc.1;uc001zzd.3;uc010bey.1	1588;1588;1588;1588;1588;1588	152707;152707;152707;32657;57120;152707
chr15	51943984	51944910	927	*	Distal Intergenic	15	51973550	52013223	39674	1	29106	uc002abh.3	-28640	ENSG00000104112	SCG3	secretogranin III	uc002abf.3;uc010bfa.3;uc010ufy.2;uc002abg.3;uc002abh.3;uc010ufz.2	23312;23312;23312;23312;29106;29106	-29017;-29017;-29017;-29017;-28640;-28640
chr15	55807713	55808228	516	*	Distal Intergenic	15	55722506	55800432	77927	2	161582	uc002add.3	-7281	ENSG00000256061	DNAAF4	dynein axonemal assembly factor 4	uc002acy.3;uc010ugh.1;uc010ugi.2;uc002adb.3;uc002adc.3;uc002add.3;uc010bfl.1;uc002adf.1	100533483;100533483;161582;161582;161582;161582;26108;26108	-16931;-16931;-16931;-7281;-7281;-7281;71909;72822
chr15	67390390	67391250	861	*	Intron (uc002aqj.3/4088, intron 1 of 8)	15	67418054	67487533	69480	1	4088	uc010ujr.2	-26804	ENSG00000166949	SMAD3	SMAD family member 3	uc002aqj.3;uc010ujr.2;uc010ujs.2	4088;4088;4088	0;-26804;-39109
chr15	68996481	68997537	1057	*	Intron (uc002arj.4/10391, intron 3 of 11)	15	69005102	69020144	15043	1	10391	uc002ark.3	-7565	ENSG00000103647	CORO2B	coronin 2B	uc002arj.4;uc021spj.1;uc010bic.3;uc002ark.3	10391;10391;10391;10391	0;0;0;-7565
chr15	69276079	69277166	1088	*	Intron (uc021spl.1/100313884, intron 1 of 1)	15	69307034	69349501	42468	1	79400	uc002arr.2	-29868	ENSG00000290203	NOX5	NADPH oxidase 5	uc021spl.1;uc002arn.2;uc002arp.2;uc002arq.2;uc010bid.2;uc002arr.2;uc002ars.2;uc010bie.2;uc010bif.2	100313884;246777;79400;79400;79400;79400;79400;79400;79400	0;53240;0;0;0;-29868;-29868;-29868;-46776
chr15	69283482	69284843	1362	*	Intron (uc021spl.1/100313884, intron 1 of 1)	15	69307034	69349501	42468	1	79400	uc002arr.2	-22191	ENSG00000290203	NOX5	NADPH oxidase 5	uc021spl.1;uc002arn.2;uc002arp.2;uc002arq.2;uc010bid.2;uc002arr.2;uc002ars.2;uc010bie.2;uc010bif.2	100313884;246777;79400;79400;79400;79400;79400;79400;79400	0;60643;0;0;0;-22191;-22191;-22191;-39099
chr15	69406716	69407518	803	*	Intron (uc021spl.1/100313884, intron 1 of 1)	15	69373226	69388163	14938	1	283673	uc010big.3	33490	ENSG00000212766	EWSAT1	Ewing sarcoma associated transcript 1	uc021spl.1;uc002arw.2;uc002arx.2;uc002ary.1;uc002art.3;uc002arv.3;uc010big.3	100313884;26035;26035;26035;283673;283673;283673	0;-45455;-45455;-45455;41450;33526;33490
chr15	69802768	69803586	819	*	Intron (uc002asf.1/145837, intron 3 of 5)	15	69760512	69863779	103268	1	145837	uc002asg.1	42256	ENSG00000245750	DRAIC	downregulated RNA in cancer, inhibitor of cell invasion and migration	uc002asf.1;uc002asg.1	145837;145837	0;0
chr15	70739974	70740993	1020	*	Distal Intergenic	15	70946893	70994620	47728	2	55075	uc002asq.3	253627	ENSG00000137831	UACA	uveal autoantigen with coiled-coil domains and ankyrin repeats	NA	NA	NA
chr15	74902357	74903462	1106	*	Promoter (1-2kb)	15	74900713	74922542	21830	1	1198	uc002ayh.4	1644	ENSG00000179335	CLK3	CDC like kinase 3	uc002ayc.3;uc002ayd.3;uc002aye.3;uc010bjs.1;uc002ayg.4;uc002ayh.4;uc010ulm.1;uc010uln.2;uc002ayj.4;uc002ayk.4;uc002ayl.4;uc002aym.3;uc002ayn.3;uc002ayo.3	10620;10620;10620;10620;1198;1198;1198;1198;1198;1198;1198;80153;80153;80153	68809;68809;68809;18865;0;0;-3873;-3873;-4784;-8076;-12499;84924;84924;84924
chr15	75986487	75987522	1036	*	Intron (uc002baw.3/1464, intron 1 of 9)	15	75966663	76005189	38527	2	1464	uc002baw.3	17667	ENSG00000173546	CSPG4	chondroitin sulfate proteoglycan 4	uc002bay.1;uc031qsu.1;uc002baw.3;uc002bax.1;uc002bau.3;uc002bav.3	100128285;100128285;1464;161753;257364;257364	43442;44896;0;-28797;45139;44390
chr15	78539780	78540895	1116	*	Distal Intergenic	15	78473097	78527049	53953	2	23205	uc010umy.2	-12731	ENSG00000103740	ACSBG1	acyl-CoA synthetase bubblegum family member 1	uc002bdh.3;uc010umw.2;uc010umx.2;uc010umy.2;uc002bdi.3;uc002bdj.2;uc002bdk.3;uc002bdl.3;uc002bdm.2;uc002bdn.3;uc002bdo.3;uc010umz.1;uc010una.1;uc010blc.1	23205;23205;23205;23205;55466;55466;55466;55466;55466;80349;80349;80349;80349;80349	-12731;-12731;-12731;-12731;-15592;-16094;-17665;-21464;-26444;51045;51045;51045;51045;51045
chr15	80447067	80448540	1474	*	Promoter (<=1kb)	15	80448293	80478924	30632	1	2184	uc002bfn.2	0	ENSG00000103876	FAH	fumarylacetoacetate hydrolase	uc010unl.2;uc002bfm.2;uc002bfn.2;uc010bln.1;uc010blo.1;uc002bfe.2;uc002bff.2;uc002bfg.2;uc021srv.1;uc021srw.1;uc021srx.1;uc021sry.1;uc002bfh.2;uc002bfi.2	2184;2184;2184;2184;2184;54469;54469;54469;54469;54469;54469;54469;54469;54469	0;0;0;-21339;-21339;95157;95157;95157;95157;95157;94795;94565;82164;82164
chr15	82237149	82237813	665	*	Distal Intergenic	15	82334119	82338484	4366	2	84206	uc002bgq.2	100671	ENSG00000183496	MEX3B	mex-3 RNA binding family member B	NA	NA	NA
chr15	89171067	89172138	1072	*	Promoter (1-2kb)	15	89169377	89175512	6136	1	64782	uc010bnm.1	1690	ENSG00000181026	AEN	apoptosis enhancing nuclease	uc021suc.1;uc021sud.1;uc002bmu.1;uc002bmv.1;uc010upn.1;uc010upm.2;uc010bnl.2;uc002bmt.2;uc010bnm.1	100302235;100616238;3669;3669;3669;407044;64782;64782;64782	19729;-15912;-6766;-9901;-10139;16011;6540;0;0
chr15	89921042	89921475	434	*	Promoter (<=1kb)	15	89921273	89941718	20446	1	254559	uc002bnw.2	0	ENSG00000255571	MIR9-3HG	MIR9-3 host gene	uc002bnv.2;uc002bnw.2;uc002bnu.3;uc002bnr.4;uc002bns.4	254559;254559;407051;5428;5428	0;0;9794;-43016;-43016
chr15	90686089	90687096	1008	*	Distal Intergenic	15	90627212	90645708	18497	2	3418	uc010uqc.2	-40381	ENSG00000182054	IDH2	isocitrate dehydrogenase (NADP(+)) 2	uc002boy.3;uc010uqb.2;uc002box.3;uc010uqc.2	10509;3418;3418;3418	-41056;-42162;-40381;-40381
chr15	91444510	91445772	1263	*	Promoter (<=1kb)	15	91446566	91463095	16530	1	4122	uc010bnz.2	-794	ENSG00000196547	MAN2A2	mannosidase alpha class 2A member 2	uc002bpv.3;uc010uqj.2;uc010uqk.2;uc002bpx.3;uc002bpy.3;uc010bny.3;uc002bqe.4;uc010bnz.2;uc010boa.3;uc002bqc.3;uc010uql.2;uc010uqm.2;uc010uqn.1;uc002bpu.1;uc002bqd.3;uc010uqo.1;uc010uqp.1;uc010uqq.1;uc002bqg.3;uc021suj.1	2242;2242;2242;2242;2242;2242;374659;4122;4122;4122;4122;4122;4122;5045;55898;55898;55898;55898;55898;55898	16845;16845;16845;16243;16243;16243;30002;-794;-1304;-1648;-4198;-4767;-9501;32625;-27638;-32402;-32443;-32443;-32443;-47273
chr15	99319708	99320617	910	*	Intron (uc010urq.2/3480, intron 2 of 10)	15	99327655	99327731	77	1	100616432	uc021sxh.1	-7038	ENSG00000264480	MIR4714	microRNA 4714	uc021sxh.1;uc010urq.2;uc002bul.3;uc010bon.3	100616432;3480;3480;3480	-7038;0;0;0
chr15	101647441	101648911	1471	*	Distal Intergenic	15	101593428	101610317	16890	1	79705	uc002bws.3	54013	ENSG00000154237	LRRK1	leucine rich repeat kinase 1	uc002bwr.3;uc010usb.2;uc010usc.2;uc002bws.3	79705;79705;79705;79705	187981;182725;182725;54013
chr15	101991381	101992054	674	*	Intron (uc002bwy.3/5046, intron 2 of 22)	15	101844133	101983865	139733	2	5046	uc010bpd.3	-7516	ENSG00000140479	PCSK6	proprotein convertase subtilisin/kexin type 6	uc010bpd.3;uc002bwy.3;uc010bpe.3;uc002bxa.2;uc002bxb.2;uc002bxc.1;uc002bxd.1;uc002bxe.3;uc002bxg.1	5046;5046;5046;5046;5046;5046;5046;5046;5046	-7516;0;0;0;0;0;0;0;0
chr15	102496476	102496853	378	*	Promoter (1-2kb)	15	102495088	102496558	1471	1	100124412	uc010bpi.3	1388	ENSG00000248893	FAM138E	family with sequence similarity 138 member E	uc010bpi.3;uc002cds.2;uc010utv.1;uc010utw.1;uc002cdf.1;uc010bpk.1;uc010bpl.1;uc010utt.1;uc021szk.1;uc010utu.2;uc002cdi.3;uc002cdj.3;uc031qum.1;uc002cdq.3;uc010bpo.3;uc002cdr.3	100124412;100288486;100288486;100288486;26682;374666;374666;374666;374666;374666;374666;374666;374666;374666;374666;374666	0;22443;22443;22443;-33214;-4163;-4163;-4163;-4163;-4163;-4163;-9420;-14548;-16570;-16570;-17545
chr15	102498050	102498907	858	*	Distal Intergenic	15	102501016	102513250	12235	1	374666	uc010bpk.1	-2109	NA	WASH3P	WASP family homolog 3, pseudogene	uc010bpi.3;uc002cds.2;uc010utv.1;uc010utw.1;uc002cdf.1;uc010bpk.1;uc010bpl.1;uc010utt.1;uc021szk.1;uc010utu.2;uc002cdi.3;uc002cdj.3;uc031qum.1;uc002cdq.3;uc010bpo.3;uc002cdr.3	100124412;100288486;100288486;100288486;26682;374666;374666;374666;374666;374666;374666;374666;374666;374666;374666;374666	0;20389;20389;20389;-34788;-2109;-2109;-2109;-2109;-2109;-2109;-7366;-12494;-14516;-14516;-15491
chr16	163179	164095	917	*	Intron (uc010uua.1/8131, intron 3 of 12)	16	134273	188333	54061	2	8131	uc010uua.1	24238	ENSG00000103148	NPRL3	NPR3 like, GATOR1 complex subunit	uc002cft.1;uc002cfm.4;uc010bqp.3;uc002cfn.4;uc002cfo.4;uc002cfl.4;uc010uty.2;uc010utz.2;uc010bqo.1;uc010uua.1;uc002cfp.2;uc002cfq.3;uc002cfr.3;uc021szl.1;uc021szm.1;uc021szn.1	3050;4350;4350;4350;4350;64285;64285;64285;64285;8131;8131;8131;8131;8131;8131;8131	-38759;36161;35010;35010;35010;-40550;-40550;-36828;-39213;0;0;0;0;0;0;0
chr16	192730	193830	1101	*	Distal Intergenic	16	135804	188697	52894	2	8131	uc021szn.1	-4033	ENSG00000103148	NPRL3	NPR3 like, GATOR1 complex subunit	uc002cfx.1;uc002cfv.4;uc002cfu.1;uc002cfz.3;uc002cft.1;uc002cga.1;uc002cgb.1;uc002cgc.1;uc002cgd.1;uc002cge.1;uc021szo.1;uc010uua.1;uc002cfp.2;uc002cfq.3;uc002cfr.3;uc021szl.1;uc021szm.1;uc021szn.1	3039;3040;3042;3049;3050;55692;55692;55692;55692;55692;55692;8131;8131;8131;8131;8131;8131;8131	-32849;-29016;-22143;-36503;-9024;85619;65942;85619;85619;85619;0;0;0;0;0;0;0;0
chr16	374282	374893	612	*	Intron (uc021szo.1/55692, intron 1 of 9)	16	238974	385566	146593	2	55692	uc021szo.1	10673	ENSG00000007392	LUC7L	LUC7 like	uc002cgs.2;uc002cgm.1;uc021szo.1;uc002cgu.4;uc002cgv.4;uc002cgn.1;uc002cgo.1;uc010bqt.1;uc002cgp.2;uc002cgq.2;uc002cgi.1;uc002cgj.1;uc002cgk.1;uc010bqs.1;uc010uue.2	10573;398;55692;58986;58986;64714;64714;64714;8312;8312;8786;8786;8786;8786;8786	45676;43676;0;57057;57085;43676;41667;41667;0;0;-48368;-48368;-48368;-48368;-48368
chr16	618491	619117	627	*	Promoter (<=1kb)	16	619968	627214	7247	1	9091	uc002chm.3	-851	ENSG00000007541	PIGQ	phosphatidylinositol glycan anchor biosynthesis class Q	uc021szr.1;uc031qun.1;uc002chk.3;uc002chl.3;uc021szt.1;uc021szu.1;uc002chq.3;uc021szv.1;uc002chr.3;uc010uuh.1;uc002chg.3;uc002chh.1;uc002chi.3;uc002chj.3;uc010bqw.3;uc002chm.3;uc002chn.3;uc002cho.3;uc010uui.2;uc002chp.3;uc002chf.3;uc010uuf.2;uc010uug.2	100423037;100847028;146325;283948;57799;57799;57799;57799;57799;64493;6650;6650;6650;6650;9091;9091;9091;9091;9091;9091;9727;9727;9727	25214;33175;8069;0;-20240;-20552;-20960;-20960;-21056;-41084;40635;40635;40635;16190;0;-851;-851;-851;-3389;-12644;142823;93641;85966
chr16	1294676	1295409	734	*	Distal Intergenic	16	1291154	1292555	1402	1	7177	uc010uux.2	3522	ENSG00000172236	TPSAB1	tryptase alpha/beta 1	uc002clb.1;uc010brm.1;uc002ckw.2;uc010brk.1;uc002ckx.3;uc002cky.3;uc002ckz.3;uc010uux.2;uc002cks.3;uc002ckt.3;uc002cku.3;uc002ckv.3;uc010brj.3	23430;23430;25823;64499;64499;64499;7177;7177;8912;8912;8912;8912;8912	-10864;-11108;-19422;-14491;-14724;-14491;3998;3522;91435;91435;34641;34641;34641
chr16	1870368	1871113	746	*	Intron (uc002cmz.3/3029, intron 4 of 9)	16	1859104	1877195	18092	2	3029	uc002cmz.3	6082	ENSG00000063854	HAGH	hydroxyacylglutathione hydrolase	uc002cmw.4;uc002cmx.4;uc002cmq.1;uc010brw.1;uc002cne.2;uc010uvq.1;uc010uvr.2;uc002cmz.3;uc002cna.3;uc010uvp.2;uc010bry.1;uc002cmy.3;uc010uvn.2;uc010uvo.2;uc002cmm.3;uc010brv.3;uc002cmo.3;uc021taj.1;uc002cnc.1;uc002cnd.3;uc010brz.3;uc002cmt.3;uc002cmu.3;uc031quq.1;uc010uvm.2	10101;10101;197342;197342;254528;254528;254528;3029;3029;3029;3029;3483;3483;3483;4832;4832;65993;65993;81889;81889;81889;90864;90864;90864;90864	37435;37435;47139;47139;51066;51066;63119;0;0;0;0;-26634;-26634;-25459;-48658;-48658;-47228;-47228;-6112;0;0;-37862;-37787;-37787;-37787
chr16	1882450	1883445	996	*	Intron (uc002cnd.3/81889, intron 1 of 2)	16	1877225	1890203	12979	1	81889	uc010brz.3	5225	ENSG00000180185	FAHD1	fumarylacetoacetate hydrolase domain containing 1	uc002cmw.4;uc002cmx.4;uc002cne.2;uc010uvq.1;uc010uvr.2;uc002cmz.3;uc002cna.3;uc010uvp.2;uc010bry.1;uc002cmy.3;uc010uvn.2;uc010uvo.2;uc021tal.1;uc002cnc.1;uc002cnd.3;uc010brz.3;uc002cmt.3;uc002cmu.3;uc031quq.1;uc010uvm.2	10101;10101;254528;254528;254528;3029;3029;3029;3029;3483;3483;3483;64735;81889;81889;81889;90864;90864;90864;90864	49517;49517;38734;38734;50787;0;0;0;0;-38716;-38716;-37541;50787;5225;0;0;-49944;-49869;-49869;-49869
chr16	3271643	3272061	419	*	Distal Intergenic	16	3265562	3266546	985	1	26184	uc010uwv.2	6081	ENSG00000203581	OR1F2P	olfactory receptor family 1 subfamily F member 2 pseudogene	uc010uww.2;uc010uwv.2;uc002cuo.2;uc002cun.1;uc021tbw.1;uc021tbx.1;uc021tby.1;uc021tbz.1;uc021tca.1;uc021tcb.1;uc010uwu.2;uc002cuj.2;uc002cum.3;uc002cuk.2;uc010bti.2;uc002cui.2;uc002cul.3	10127;26184;283876;4210;4210;4210;4210;4210;4210;4210;4992;7752;7752;7752;7752;7752;7752	-41739;6081;-41707;34566;34566;34566;34566;34566;34566;34566;17396;13125;13125;13395;13395;13396;13396
chr16	4296537	4297917	1381	*	Exon (uc002cwa.1/100507501, exon 3 of 3)	16	4239375	4292081	52707	2	6345	uc002cvz.4	-4456	ENSG00000185739	SRL	sarcalumenin	uc002cwa.1;uc002cvy.4;uc002cvz.4;uc010uxg.2	100507501;6345;6345;7023	0;-4456;-4456;25084
chr16	4874711	4875787	1077	*	Intron (uc002cxx.4/84656, intron 5 of 15)	16	4854523	4896211	41689	2	84656	uc002cxz.1	20424	ENSG00000140632	GLYR1	glyoxylate reductase 1 homolog	uc002cxq.3;uc002cxr.3;uc010bty.3;uc010uxw.2;uc002cyb.3;uc002cyc.3;uc021tcl.1;uc002cxt.3;uc021tcm.1;uc021tcn.1;uc010btz.1;uc002cxu.4;uc002cxv.4;uc002cxw.4;uc010bub.1;uc010uxu.3;uc002cxx.4;uc002cxy.3;uc002cxz.1;uc002cya.2;uc010uxv.1	124404;124404;124404;29855;29855;29855;440335;440335;440335;440335;440335;79641;79641;79641;79641;79641;84656;84656;84656;84656;84656	-36189;-36189;-36189;-20879;-22125;-26290;36313;36254;29332;29332;29007;-22548;-21760;-21760;-22257;-21760;0;0;0;0;0
chr16	10450797	10452116	1320	*	Distal Intergenic	16	10479912	10577495	97584	1	80063	uc002czu.3	-27796	ENSG00000166669	ATF7IP2	activating transcription factor 7 interacting protein 2	uc002czu.3;uc002czv.3;uc010uyo.2;uc010uyp.2	80063;80063;80063;80063	-27796;-27796;-27796;-27796
chr16	10594790	10595389	600	*	Distal Intergenic	16	10522725	10577495	54771	1	80063	uc010uyq.2	72065	ENSG00000166669	ATF7IP2	activating transcription factor 7 interacting protein 2	uc002czx.3;uc002czu.3;uc002czv.3;uc010uyo.2;uc010uyp.2;uc010uyq.2	2013;80063;80063;80063;80063;80063	79150;114878;114878;114878;114878;72065
chr16	11065535	11066842	1308	*	Exon (uc002dan.4/23274, exon 6 of 21)	16	11038345	11276046	237702	1	23274	uc021tcy.1	27190	ENSG00000038532	CLEC16A	C-type lectin domain containing 16A	uc002dan.4;uc002dao.3;uc021tcy.1;uc002dal.3;uc002dai.4;uc002daj.4;uc002dak.4	23274;23274;23274;28955;4261;4261;4261	0;0;0;-29278;94480;94480;94480
chr16	11707363	11708083	721	*	Distal Intergenic	16	11641578	11681322	39745	2	9516	uc002dbd.3	-26041	ENSG00000189067	LITAF	lipopolysaccharide induced TNF factor	uc002daz.3;uc002dba.3;uc002dbb.3;uc002dbd.3;uc002dbe.3	9516;9516;9516;9516;9516	-27134;-26557;-26557;-26041;-26557
chr16	15615204	15616752	1549	*	Intron (uc002ddo.3/89927, intron 2 of 5)	16	15596123	15682116	85994	1	89927	uc002ddp.3	19081	ENSG00000166780	BMERB1	bMERB domain containing 1	uc002ddo.3;uc002ddp.3	89927;89927	0;0
chr16	16213959	16215571	1613	*	Intron (uc010bvi.3/4363, intron 23 of 30)	16	16208623	16225792	17170	1	4363	uc021tdt.1	5336	ENSG00000103222	ABCC1	ATP binding cassette subfamily C member 1 (ABCC1 blood group)	uc002den.4;uc010bvo.3;uc010bvi.3;uc002del.4;uc021tdq.1;uc021tdr.1;uc021tds.1;uc021tdt.1	368;368;4363;4363;4363;4363;4363;4363	101757;101757;0;0;67378;64010;0;0
chr16	19499045	19499970	926	*	Intron (uc010vaq.2/79838, intron 16 of 20)	16	19467806	19510434	42629	1	79838	uc002dgg.4	31239	ENSG00000103534	TMC5	transmembrane channel like 5	uc002dgh.3;uc002dgi.3;uc010vaq.2;uc002dgb.4;uc002dgc.4;uc010var.2;uc002dgd.1;uc002dge.4;uc002dgf.4;uc002dgg.4;uc002dgj.3;uc002dgk.4;uc002dgl.4	51573;51573;79838;79838;79838;79838;79838;79838;79838;79838;9738;9738;9738	33480;33480;0;0;0;0;0;0;0;0;-35209;-35209;-35209
chr16	20684353	20686132	1780	*	Exon (uc002dhn.1/116285, exon 4 of 11)	16	20634559	20702578	68020	2	116285	uc002dhm.1	16446	ENSG00000166743	ACSM1	acyl-CoA synthetase medium chain family member 1	uc002dhm.1;uc002dhn.1;uc010bwg.1	116285;116285;116285	0;0;0
chr16	20757857	20759064	1208	*	Distal Intergenic	16	20744989	20753199	8211	2	55623	uc002dho.3	-4658	ENSG00000066654	THUMPD1	THUMP domain containing 1	uc002dhs.3;uc010bwh.2;uc010vbb.1;uc010vbc.1;uc002dht.3;uc002dhu.1;uc010bwg.1;uc002dhp.3;uc010vaz.2;uc002dho.3;uc002dhq.3;uc002dhr.3;uc010vba.2	112479;112479;112479;112479;112479;112479;116285;55623;55623;55623;6296;6296;6296	58731;58731;58731;58731;152497;58731;0;-4658;-8515;-4658;-16248;-16248;-22242
chr16	21272417	21273507	1091	*	Exon (uc010bwq.1/1428, exon 7 of 10)	16	21250195	21289657	39463	2	1428	uc010bwq.1	16150	ENSG00000103316	CRYM	crystallin mu	uc010bwq.1;uc002dil.3;uc002dim.3;uc010bwp.1;uc010bwr.1;uc002dii.2;uc010bwn.1;uc010bwo.3	1428;1428;1428;257629;400508;7783;7783;7783	0;0;0;27401;-38663;-49350;-49350;-49350
chr16	21525224	21525991	768	*	Intron (uc021tel.1/uc021tel.1, intron 2 of 3)	16	21475024	21531765	56742	2	100271836	uc002dja.3	5774	ENSG00000180747	SMG1P3	SMG1 pseudogene 3	uc002dja.3;uc002djc.3;uc002djd.3	100271836;100271836;387254	0;-26234;0
chr16	21531248	21532024	777	*	Promoter (<=1kb)	16	21475024	21531765	56742	2	100271836	uc002dja.3	0	ENSG00000180747	SMG1P3	SMG1 pseudogene 3	uc002dja.3;uc002djc.3;uc002djd.3	100271836;100271836;387254	0;-32258;0
chr16	21547409	21548759	1351	*	Intron (uc021tel.1/uc021tel.1, intron 2 of 3)	16	21529230	21531765	2536	2	387254	uc002djd.3	-15644	NA	SLC7A5P2	solute carrier family 7 member 5 pseudogene 2	uc002dja.3;uc002djc.3;uc002djd.3	100271836;100271836;387254	0;-48419;0
chr16	22293361	22294309	949	*	Intron (uc002dkh.3/29904, intron 17 of 18)	16	22308696	22340412	31717	1	55718	uc002dkj.2	-14387	ENSG00000058600	POLR3E	RNA polymerase III subunit E	uc002dkh.3;uc002dki.3;uc002dkj.2;uc002dkk.4;uc002dkl.4;uc002dkm.4;uc010vbr.3;uc010vbs.3;uc010vbt.3	29904;29904;55718;55718;55718;55718;55718;55718;55718	0;0;-14387;-14387;-14387;-14387;-14387;-14387;-14387
chr16	23918604	23919369	766	*	Intron (uc002dmd.3/5579, intron 2 of 16)	16	23847300	24231932	384633	1	5579	uc002dme.3	71304	ENSG00000166501	PRKCB	protein kinase C beta	uc002dmd.3;uc002dme.3	5579;5579	0;0
chr16	27246258	27247218	961	*	Exon (uc002doi.1/197370, exon 3 of 8)	16	27225933	27233089	7157	1	79831	uc010bxx.2	20325	ENSG00000155666	KDM8	lysine demethylase 8	uc002doi.1;uc002doj.1;uc002dok.3;uc010bxv.2;uc002doh.2;uc010vcn.1;uc010bxw.2;uc010bxx.2	197370;197370;400512;79831;79831;79831;79831;79831	0;0;-32308;31451;31451;30962;24844;20325
chr16	29020327	29021371	1045	*	Intron (uc010vct.2/uc010vct.2, intron 2 of 7)	16	28996697	29001340	4644	1	27040	uc010vdl.1	23630	ENSG00000213658	LAT	linker for activation of T cells	uc002dsb.3;uc002dsc.3;uc002dsd.3;uc010vdj.2;uc010vdk.1;uc010vdl.1;uc002dry.2;uc002drx.2;uc002drz.2;uc002dsa.2;uc010byp.2;uc010vdi.1;uc002drt.3;uc002dru.3;uc002drv.3;uc010vdh.2	27040;27040;27040;27040;27040;27040;83985;83985;83985;83985;83985;83985;84901;84901;84901;84901	24801;24801;24801;24180;23630;23630;34231;34231;34231;34231;34231;34231;58199;58009;53036;50556
chr16	29467794	29468470	677	*	Promoter (<=1kb)	16	29467769	29476301	8533	1	100526831	uc002dta.3	25	ENSG00000260280	SLX1B-SULT1A4	SLX1B-SULT1A4 readthrough (NMD candidate)	uc002dsw.3;uc002dsz.3;uc002dta.3;uc010bys.1;uc002dsp.3;uc002dsx.3;uc002dsy.3;uc002dso.3;uc002dsr.3;uc002dss.3;uc002dsq.1;uc002dtc.1;uc010vdp.2;uc002dtb.3;uc010byw.3	100526831;100526831;100526831;440352;440354;548593;548593;552900;552900;552900;606724;613038;6818;6818;6818	0;0;0;127920;0;0;0;-1509;-1509;-1509;7128;10429;-2737;-2737;-4233
chr16	29665987	29666738	752	*	Intron (uc010bzb.2/552900, intron 2 of 4)	16	29674271	29681823	7553	1	6693	uc002dtm.4	-7533	ENSG00000197471	SPN	sialophorin	uc002dto.3;uc010vdu.2;uc002dsp.3;uc010bzb.2;uc002dtm.4;uc002dtn.4;uc002dtl.1	23475;23475;440354;552900;6693;6693;81893	-23703;-23703;0;0;-7533;-7802;-40949
chr16	29953971	29955498	1528	*	Promoter (1-2kb)	16	29952206	29984373	32168	1	124446	uc002duw.2	1765	ENSG00000149932	TMEM219	transmembrane protein 219	uc002duw.2;uc002duy.2;uc010bzk.1;uc010bzl.1;uc002duv.4;uc021tge.2;uc002dut.3;uc002duu.3;uc010bzi.2;uc002dup.4;uc002duq.4;uc002dur.4;uc002dus.4;uc010vec.2;uc010ved.2;uc010bzb.2;uc031qvp.1;uc002dve.3;uc002dvf.3;uc002dvb.2;uc002dva.2;uc021tgf.1;uc002dvc.2;uc010bzm.2;uc002dvd.2	124446;124446;124446;124446;253980;253980;253982;253982;253982;26470;26470;26470;26470;26470;26470;552900;8479;8479;8479;9344;9344;9344;9344;9344;9344	0;-17853;-17853;-18933;-16426;-16426;41824;41824;41824;-43386;-43386;-43386;-43386;-43386;-43386;0;51897;51919;51919;-29690;-29690;-29690;-29690;-33561;-36175
chr16	30207173	30207860	688	*	Promoter (<=1kb)	16	30207111	30215650	8540	1	100526831	uc002dxj.3	62	ENSG00000260280	SLX1B-SULT1A4	SLX1B-SULT1A4 readthrough (NMD candidate)	uc002dxf.3;uc002dxi.3;uc002dxj.3;uc010vej.2;uc002dww.3;uc010bzq.3;uc002dwy.1;uc010vek.2;uc002dxk.3;uc010bzt.3;uc002dxg.3;uc002dxh.3;uc010bzb.2;uc002dxa.3;uc002dxb.3;uc002dwz.1;uc010vel.2;uc010vem.2;uc002dxl.3	100526831;100526831;100526831;11151;11151;11151;11151;445329;445329;445329;548593;548593;552900;552900;552900;606724;613037;613037;613038	0;0;0;12442;12442;12442;9170;-2689;-2689;-4186;0;0;0;-1546;-1546;7168;49072;49262;10388
chr16	30271971	30272350	380	*	Distal Intergenic	16	30275908	30282198	6291	2	440354	uc010vep.2	9848	NA	SMG1P2	SMG1 pseudogene 2	uc010vep.2;uc002dxp.1;uc010vel.2;uc010vem.2	440354;595101;613037;613037	9848;74345;-15039;-14849
chr16	30537889	30539022	1134	*	Promoter (<=1kb)	16	30535322	30537910	2589	2	79724	uc002dyk.4	0	ENSG00000169957	ZNF768	zinc finger protein 768	uc021tgm.1;uc002dys.2;uc002dyt.2;uc010veu.1;uc002dyi.4;uc002dyj.4;uc010vev.2;uc002dyn.3;uc002dyo.1;uc010vey.1;uc002dyk.4;uc010vew.2;uc010vex.2;uc002dyq.3;uc002dyr.2	100616405;146542;146542;3683;3683;3683;3683;65988;65988;65988;79724;79724;79724;92595;92595	22649;44706;44706;53906;53906;53906;53906;7172;7172;7172;0;0;0;30620;30620
chr16	30777690	30778660	971	*	Promoter (<=1kb)	16	30779572	30784104	4533	1	9810	uc010vfc.1	-912	ENSG00000103549	RNF40	ring finger protein 40	uc031qvt.1;uc021tgn.1;uc002dze.1;uc002dzf.4;uc002dzg.1;uc002dzs.1;uc002dzk.2;uc021tgo.1;uc002dzl.1;uc002dzo.4;uc021tgp.2;uc002dzm.3;uc002dzp.3;uc002dzq.3;uc010caa.3;uc010cab.3;uc010vfa.2;uc002dzr.3;uc010vfb.2;uc010vfc.1	100862671;10847;10847;10847;10847;23361;5261;5261;5261;90835;90835;90835;90835;9810;9810;9810;9810;9810;9810;9810	29320;67776;67228;62305;59186;19863;18070;18070;17566;-4171;-4171;-4125;-4125;0;0;0;0;0;0;-912
chr16	30960928	30961746	819	*	Promoter (<=1kb)	16	30960405	30966259	5855	1	93129	uc002eac.3	523	ENSG00000175938	ORAI3	ORAI calcium release-activated calcium modulator 3	uc010cad.2;uc010vfd.2;uc002dzw.3;uc002dzx.3;uc002dzy.3;uc002dzz.1;uc002eaa.2;uc002eab.2;uc002eaf.2;uc002eag.2;uc010cac.2;uc002eah.2;uc002eac.3;uc002ead.1;uc002eae.1	112755;112755;1489;1489;283932;54620;54620;54620;80270;80270;80270;80270;93129;9739;9739	60083;60083;53000;53000;-26338;26536;25032;25032;-34773;-34773;-34773;-35035;0;-6869;-7340
chr16	46558113	46559174	1062	*	Intron (uc002eeb.3/124149, intron 8 of 16)	16	46503249	46552312	49064	2	124149	uc010cbd.2	-5801	NA	ANKRD26P1	ankyrin repeat domain 26 pseudogene 1	uc010cbd.2;uc002eeb.3	124149;124149	-5801;0
chr16	50296824	50298059	1236	*	Distal Intergenic	16	50300462	50338870	38409	1	113	uc002egb.1	-2403	ENSG00000121281	ADCY7	adenylate cyclase 7	uc002egb.1;uc002egc.2;uc002egd.1;uc002efz.3;uc010vgo.2;uc010cbi.2	113;113;113;64282;64282;64282	-2403;-2403;-23764;109995;109995;109166
chr16	57302444	57303529	1086	*	Intron (uc002elg.2/51090, intron 1 of 3)	16	57290009	57318584	28576	2	51090	uc002elg.2	15055	ENSG00000102934	PLLP	plasmolipin	uc010ccy.1;uc010vhl.2;uc002elf.1;uc002elg.2;uc002elb.3;uc002elc.3;uc002eld.3	23568;23568;23568;51090;89970;89970;89970	23406;23406;23406;0;82203;82199;82190
chr16	57723338	57724519	1182	*	Downstream (<=300bp)	16	57728713	57765367	36655	1	84229	uc002emi.3	-4194	ENSG00000159625	DRC7	dynein regulatory complex subunit 7	uc002eml.1;uc010cdc.3;uc002emh.3;uc010cdd.3;uc010vhv.2;uc010cde.3;uc002emi.3;uc002emj.3;uc002emk.3;uc002elz.1;uc002ema.1;uc002emb.2;uc002emc.2;uc002emd.2;uc002eme.2;uc002emf.2;uc010vhs.1;uc010vht.1;uc002emg.3;uc010vhu.1	10300;222487;222487;222487;222487;222487;84229;84229;84229;9289;9289;9289;9289;9289;9289;9289;9289;9289;9289;9289	-45141;21181;21181;21181;21181;9628;-4194;-4194;-4194;69688;69688;69428;69428;60919;60919;60919;60919;60919;50131;50131
chr16	58298989	58300078	1090	*	Intron (uc002ene.3/29070, intron 6 of 8)	16	58283840	58317734	33895	1	29070	uc010vid.2	15149	ENSG00000103021	CFAP263	cilia and flagella associated protein 263	uc002enf.3;uc002eng.3;uc010vie.2;uc002ene.3;uc010vid.2	221191;221191;221191;29070;29070	28873;28873;28873;0;0
chr16	58451295	58451956	662	*	Distal Intergenic	16	58426298	58440048	13751	1	64785	uc010cdj.3	24997	ENSG00000181938	GINS3	GINS complex subunit 3	uc002enh.4;uc002enj.4;uc010cdj.3;uc002enk.3;uc002enm.3;uc010vif.2	64785;64785;64785;65009;65009;65009	24997;24997;24997;-45593;-46038;-46770
chr16	58467449	58468790	1342	*	Distal Intergenic	16	58497549	58547523	49975	1	65009	uc002enk.3	-28759	ENSG00000103034	NDRG4	NDRG family member 4	uc002enh.4;uc002enj.4;uc010cdj.3;uc002enk.3;uc002enm.3;uc010vif.2	64785;64785;64785;65009;65009;65009	41151;41151;41151;-28759;-29204;-29936
chr16	65802594	65804864	2271	*	Distal Intergenic	16	65318402	65610203	291802	2	283867	uc002eol.1	-192391	ENSG00000261742	LINC00922	long intergenic non-protein coding RNA 922	NA	NA	NA
chr16	66651461	66652283	823	*	3' UTR	16	66638634	66647795	9162	1	123920	uc002epy.3	12827	ENSG00000140931	CMTM3	CKLF like MARVEL transmembrane domain containing 3	uc021tjs.1;uc021tjt.1;uc021tju.1;uc002epa.4;uc002epb.4;uc002epc.4;uc002epd.4;uc002epe.4;uc002epf.4;uc002epg.4;uc002eph.4;uc002epi.4;uc002epj.4;uc002epk.4;uc002epl.4;uc002epm.4;uc002epn.4;uc002epo.4;uc002epp.4;uc002epq.4;uc002epr.4;uc010cds.3;uc002eps.4;uc002epu.3;uc002epv.3;uc002epx.3;uc002epy.3;uc002epz.3;uc002eqa.3;uc002ept.3;uc010cdu.3	100529251;100529251;100529251;113540;113540;113540;113540;113540;113540;113540;113540;113540;113540;113540;113540;113540;113540;113540;113540;113540;113540;113540;113540;123920;123920;123920;123920;146223;146223;146225;146225	64995;64995;64995;51167;51167;51167;51167;51167;51167;51167;51167;51167;51167;51167;51167;51111;51111;51111;51111;51111;51111;51111;47622;13526;13233;12894;12827;0;0;38110;38110
chr16	67227998	67228873	876	*	Promoter (1-2kb)	16	67226068	67232821	6754	1	1874	uc002erz.3	1930	ENSG00000205250	E2F4	E2F transcription factor 4	uc002erz.3;uc002esd.3;uc002ese.3;uc002esf.3;uc002esg.3;uc010vjg.2;uc002erv.1;uc002erw.1;uc002erx.1;uc002ery.1;uc010vje.1;uc002esi.2;uc002esj.2;uc002esl.3;uc010ced.3;uc010vjh.1;uc002erl.2;uc002erm.2;uc002ern.1;uc010cec.1;uc010vjf.1;uc002erk.1;uc002err.3;uc002ers.3;uc002ert.3;uc002eru.3;uc002esa.3;uc002esb.3;uc002esc.3;uc002erc.3;uc002erd.3;uc002erf.3;uc002erh.1;uc002eri.1;uc010vjb.1;uc031qwm.1;uc0…	1874;26231;26231;26231;26231;26231;283849;283849;283849;283849;283849;29100;29100;29109;29109;29109;3299;3299;3299;3299;442901;55336;653319;653319;653319;653319;79767;79767;79767;80262;80262;84752;8717;8717;8717;8996;8996;8996;8996;8996;8996	0;16115;31848;32028;32028;32028;-3891;-3996;-3891;-3891;-3891;-32143;-32143;52552;52552;52552;30710;30710;29654;29654;7425;34107;-15591;-14543;-10055;-10055;-4155;-4155;-4539;84132;84083;-43096;-37846;-34186;-34186;23598;23598;23598;20242;20242;20242
chr16	68027435	68027938	504	*	Promoter (<=1kb)	16	68021293	68027279	5987	2	64174	uc010cey.3	-156	ENSG00000167261	DPEP2	dipeptidase 2	uc002euy.1;uc002evi.4;uc002evj.4;uc010vkk.3;uc002evh.2;uc010cey.3;uc002eve.4;uc002evf.3;uc002evg.3;uc002evc.4;uc010cex.3;uc010ceu.2;uc010vkh.1;uc002euz.2;uc010vki.1;uc010vkj.1;uc002eva.2;uc010cev.1;uc002evb.2;uc010cew.1	3931;54920;54920;54920;55794;64174;64174;64174;64174;64180;64180;6560;6560;6560;6560;6560;6560;6560;6560;6560	-49420;-28909;-28909;-28909;29832;-156;0;0;0;-12983;-12983;-29467;-26654;-24838;-24838;-24838;-24838;-46097;-29467;-24340
chr16	68113388	68114727	1340	*	Downstream (<=300bp)	16	68118654	68226115	107462	1	4775	uc010vkl.2	-3927	ENSG00000072736	NFATC3	nuclear factor of activated T cells 3	uc010vkl.2;uc010vkm.2;uc010vkn.2;uc010vko.2;uc010vkp.2;uc010vkq.2;uc002evk.3;uc002evl.3;uc002evm.2;uc002evn.2;uc002evo.2;uc010vkr.2;uc010vks.2;uc010vkt.2;uc010vku.2;uc010vkv.2;uc010vkw.2;uc010vkx.2;uc010vky.2;uc010vkz.2;uc010vla.2;uc010vlb.2;uc010vlc.2;uc002evi.4;uc002evj.4;uc010vkk.3	4775;4775;4775;4775;4775;4775;4775;4775;4775;4775;4775;4775;4775;4775;4775;4775;4775;4775;4775;4775;4775;4775;4775;54920;54920;54920	-3927;-3927;-3927;-3954;-3954;-3954;-4542;-4542;-4542;-4542;-4542;-5037;-5037;-5037;-5814;-5814;-5814;-5877;-5877;-5877;-7877;-7877;-7877;56541;56541;56541
chr16	68805474	68806759	1286	*	Intron (uc002ewg.1/999, intron 2 of 15)	16	68771195	68869444	98250	1	999	uc010vlj.1	34279	ENSG00000039068	CDH1	cadherin 1	uc002ewg.1;uc010cfg.1;uc010vlj.1	999;999;999	0;0;0
chr16	70448506	70449630	1125	*	Intron (uc002eyx.2/6483, intron 1 of 6)	16	70413338	70434541	21204	2	6483	uc002eyw.2	-13965	ENSG00000157350	ST3GAL2	ST3 beta-galactoside alpha-2,3-sialyltransferase 2	uc010vmb.1;uc002eyy.3;uc002eyz.3;uc010cft.3;uc002eys.4;uc010cfq.1;uc002eyv.3;uc010cfr.3;uc010cfs.3;uc010vlz.2;uc010vma.3;uc002eyw.2;uc002eyx.2	197258;197258;197258;197258;55308;55308;55308;55308;55308;55308;55308;6483;6483	-38868;-38868;-38868;-38868;115444;67682;67682;67682;67682;67682;57742;-13965;0
chr16	70448506	70449630	1125	*	Intron (uc002eyx.2/6483, intron 1 of 6)	16	70413338	70434541	21204	2	6483	uc002eyw.2	-13965	ENSG00000157350	ST3GAL2	ST3 beta-galactoside alpha-2,3-sialyltransferase 2	uc010vmb.1;uc002eyy.3;uc002eyz.3;uc010cft.3;uc002eys.4;uc010cfq.1;uc002eyv.3;uc010cfr.3;uc010cfs.3;uc010vlz.2;uc010vma.3;uc002eyw.2;uc002eyx.2	197258;197258;197258;197258;55308;55308;55308;55308;55308;55308;55308;6483;6483	-38868;-38868;-38868;-38868;115444;67682;67682;67682;67682;67682;57742;-13965;0
chr16	70461779	70462901	1123	*	Intron (uc002eyx.2/6483, intron 1 of 6)	16	70413338	70472991	59654	2	6483	uc002eyx.2	10090	ENSG00000157350	ST3GAL2	ST3 beta-galactoside alpha-2,3-sialyltransferase 2	uc010vmb.1;uc002eyy.3;uc002eyz.3;uc010cft.3;uc002eyw.2;uc002eyx.2	197258;197258;197258;197258;6483;6483	-25597;-25597;-25597;-25597;-27238;0
chr16	70729244	70730109	866	*	Exon (uc002ezl.3/55697, exon 4 of 6)	16	70695107	70719954	24848	2	92154	uc002ezj.3	-9290	ENSG00000132613	MTSS2	MTSS I-BAR domain containing 2	uc002ezh.2;uc002ezi.2;uc021tkk.1;uc002ezl.3;uc002ezm.3;uc002ezn.3;uc010cfw.3;uc010cfx.1;uc002ezj.3;uc002ezk.1	146433;146433;146433;55697;55697;55697;55697;55697;92154;92154	115446;115446;71349;0;0;0;0;48432;-9290;-15286
chr16	74976605	74977601	997	*	Exon (uc002fdh.1/79726, exon 7 of 26)	16	74945903	74999720	53818	2	79726	uc021tli.1	22119	ENSG00000103091	WDR59	WD repeat domain 59	uc002fdf.1;uc002fdg.1;uc002fdh.1;uc002fdi.3;uc021tli.1	79726;79726;79726;79726;79726	-38361;-26580;0;0;0
chr16	75108563	75109692	1130	*	Intron (uc010vmz.1/84937, intron 1 of 2)	16	75145758	75150670	4913	2	197257	uc002fdm.3	40978	ENSG00000166816	LDHD	lactate dehydrogenase D	uc002fdm.3;uc002fdn.3;uc010vmz.1;uc002fdk.3;uc002fdl.1;uc010cgr.1	197257;197257;84937;84937;84937;84937	40978;40978;0;0;0;0
chr16	75121441	75121887	447	*	Intron (uc010vmz.1/84937, intron 1 of 2)	16	75145758	75150670	4913	2	197257	uc002fdm.3	28783	ENSG00000166816	LDHD	lactate dehydrogenase D	uc002fdm.3;uc002fdn.3;uc010vmz.1;uc002fdk.3;uc002fdl.1;uc010cgr.1	197257;197257;84937;84937;84937;84937	28783;28783;0;0;0;0
chr16	81528683	81530040	1358	*	Promoter (<=1kb)	16	81528954	81745367	216414	1	80790	uc002fgq.2	0	ENSG00000153815	CMIP	c-Maf inducing protein	uc002fgp.3;uc002fgq.2	80790;80790	0;0
chr16	85411061	85412207	1147	*	Distal Intergenic	16	85339832	85339931	100	2	100847022	uc031qxb.1	-71130	ENSG00000266307	MIR5093	microRNA 5093	NA	NA	NA
chr16	85415308	85416302	995	*	Distal Intergenic	16	85339832	85339931	100	2	100847022	uc031qxb.1	-75377	ENSG00000266307	MIR5093	microRNA 5093	NA	NA	NA
chr16	85568528	85569698	1171	*	Distal Intergenic	16	85645029	85709812	64784	1	23199	uc002fiw.3	-75331	ENSG00000131149	GSE1	Gse1 coiled-coil protein	NA	NA	NA
chr16	85600251	85601147	897	*	Distal Intergenic	16	85645029	85709812	64784	1	23199	uc002fiw.3	-43882	ENSG00000131149	GSE1	Gse1 coiled-coil protein	uc002fiw.3;uc002fix.4;uc002fiy.4	23199;23199;23199	-43882;-45695;-45695
chr16	87887157	87888788	1632	*	Intron (uc002fkm.3/8140, intron 1 of 9)	16	87863629	87903100	39472	2	8140	uc002fkm.3	14312	ENSG00000103257	SLC7A5	solute carrier family 7 member 5	uc002fkn.1;uc002fkm.3	763;8140	81324;0
chr16	87891232	87892483	1252	*	Intron (uc002fkm.3/8140, intron 1 of 9)	16	87863629	87903100	39472	2	8140	uc002fkm.3	10617	ENSG00000103257	SLC7A5	solute carrier family 7 member 5	uc002fkn.1;uc002fkm.3	763;8140	77629;0
chr16	88520026	88522897	2872	*	Promoter (<=1kb)	16	88520014	88601574	81561	1	161882	uc002fkv.3	12	ENSG00000179588	ZFPM1	zinc finger protein, FOG family member 1	uc031qxh.1;uc002fkv.3;uc002fku.2	100847057;161882;84627	-12429;0;26147
chr16	88524430	88525726	1297	*	Intron (uc002fkv.3/161882, intron 1 of 9)	16	88520014	88601574	81561	1	161882	uc002fkv.3	4416	ENSG00000179588	ZFPM1	zinc finger protein, FOG family member 1	uc031qxh.1;uc002fkv.3;uc002fku.2	100847057;161882;84627	-9600;0;30551
chr16	88557695	88559019	1325	*	Intron (uc002fkv.3/161882, intron 3 of 9)	16	88535326	88535439	114	1	100847057	uc031qxh.1	22369	ENSG00000263456	MIR5189	microRNA 5189	uc031qxh.1;uc002fkv.3	100847057;161882	22369;0
chr16	89045154	89046031	878	*	Promoter (1-2kb)	16	88951454	89043504	92051	2	863	uc002fmn.2	-1650	ENSG00000129993	CBFA2T3	CBFA2/RUNX1 partner transcriptional co-repressor 3	uc002fml.2;uc002fmm.2;uc010cif.1;uc002fmn.2	863;863;863;863	-37546;-1650;-36937;-1650
chr16	89058600	89059706	1107	*	Distal Intergenic	16	88951454	89043504	92051	2	863	uc002fmn.2	-15096	ENSG00000129993	CBFA2T3	CBFA2/RUNX1 partner transcriptional co-repressor 3	uc002fmm.2;uc002fmn.2	863;863	-15096;-15096
chr16	89069784	89071256	1473	*	Distal Intergenic	16	88951454	89043504	92051	2	863	uc002fmn.2	-26280	ENSG00000129993	CBFA2T3	CBFA2/RUNX1 partner transcriptional co-repressor 3	uc002fmm.2;uc002fmn.2	863;863	-26280;-26280
chr17	504528	505526	999	*	5' UTR	17	411908	579647	167740	2	55275	uc002frk.3	74121	ENSG00000141252	VPS53	VPS53 subunit of GARP complex	uc002frk.3;uc010cjo.2;uc002frl.2;uc002frm.2;uc002frn.2;uc002fro.2;uc010cjp.1	55275;55275;55275;55275;55275;55275;55275	0;0;0;0;0;0;0
chr17	1552291	1553595	1305	*	Promoter (<=1kb)	17	1549445	1553392	3948	2	83547	uc002ftd.3	0	ENSG00000167705	RILP	Rab interacting lysosomal protein	uc002fte.3;uc002fsu.3;uc002fsv.3;uc002fsw.3;uc002fsx.3;uc010vqo.1;uc002ftd.3;uc002fsy.2;uc002fsz.2;uc002fta.2;uc031qxu.1	10594;124935;124935;124935;124935;124935;83547;8578;8578;8578;8578	34581;-20656;-20161;-20747;-20161;-44080;0;-3208;-3208;-3208;-3208
chr17	1633322	1634054	733	*	Promoter (<=1kb)	17	1633674	1641893	8220	1	124997	uc010vqq.1	0	ENSG00000167716	WDR81	WD repeat domain 81	uc002fte.3;uc002ftm.4;uc002fth.2;uc010vqp.1;uc002fti.2;uc002ftj.2;uc010vqq.1;uc021tnl.1;uc002ftl.3;uc002ftk.1;uc010vqr.1;uc021tnm.1;uc021tnh.1;uc002ftf.3;uc002ftg.3;uc021tni.1;uc021tnj.1	10594;114826;124997;124997;124997;124997;124997;407004;5176;5345;5345;5345;727910;84981;84981;84981;84981	-45146;99121;0;0;0;0;0;-16041;-31205;-12076;-12076;-12266;-19660;-13756;-13756;-13756;-13756
chr17	2296652	2297210	559	*	Intron (uc002fur.3/4335, intron 4 of 5)	17	2287354	2304258	16905	2	4335	uc002fur.3	7048	ENSG00000070444	MNT	MAX network transcriptional repressor	uc002fus.3;uc002fur.3;uc002fut.3;uc002fuu.4;uc010cka.3;uc002fuv.3;uc010vqx.1;uc010vqy.1;uc002fum.4;uc002fun.4;uc010vqw.2;uc002fuq.3	284009;4335;79066;79066;79066;79066;79066;79066;9905;9905;9905;9905	21520;0;117990;117990;117990;117990;117990;117990;55846;55846;55846;16998
chr17	3615810	3616642	833	*	Distal Intergenic	17	3617919	3627131	9213	2	3682	uc002fwn.4	10489	ENSG00000083457	ITGAE	integrin subunit alpha E	uc002fwd.3;uc002fwa.3;uc002fwb.3;uc010ckj.3;uc010vrv.2;uc010vrw.2;uc002fwc.3;uc021tnt.1;uc002fwe.1;uc002fwn.4;uc002fwo.4;uc010vrx.2;uc002fwi.3;uc002fwj.3;uc002fwk.3;uc002fwl.3;uc002fwm.2;uc002fwf.1;uc002fwg.1;uc002fwp.3	100533970;1497;1497;1497;1497;1497;30851;30851;30851;3682;3682;5026;5026;5026;5026;5026;5026;83460;83460;83903	-16112;76048;76048;76048;76048;76048;-43837;-43837;-43837;10489;87895;-20514;-16112;-16112;-16112;-16112;-16112;43720;43720;-10555
chr17	4794783	4795158	376	*	Exon (uc010vsk.2/50488, exon 16 of 32)	17	4788207	4801356	13150	1	50488	uc010vsp.2	6576	ENSG00000141503	MINK1	misshapen like kinase 1	uc010ckr.3;uc002fzl.3;uc002fzk.1;uc002fzs.3;uc002fzw.2;uc002fzu.3;uc021tnz.1;uc010vsk.2;uc010vsl.2;uc010vsm.2;uc010vsn.2;uc010vso.2;uc031qyf.1;uc010vsp.2;uc002fzp.2;uc002fzo.2;uc021tod.1;uc021toe.1	100130311;100130311;1145;26001;26001;26001;2811;50488;50488;50488;50488;50488;50488;50488;8402;8402;8402;8402	-7790;-7790;11211;-48472;-48624;-48624;-40434;0;0;0;0;0;0;0;48167;48304;48304;48304
chr17	7488776	7489433	658	*	Promoter (<=1kb)	17	7489787	7491527	1741	1	9526	uc031qyo.1	-354	ENSG00000129255	MPDU1	mannose-P-dolichol utilization defect 1	uc002gho.2;uc031qyn.1;uc002ghr.1;uc002gib.1;uc002gic.2;uc002ghm.3;uc002ghn.2;uc010cml.1;uc002ghi.1;uc010cmo.2;uc010cmp.2;uc010cmq.2;uc010cmr.2;uc010cms.2;uc010cmt.2;uc010cmu.2;uc002gid.3;uc010cmv.2;uc010cmw.2;uc010cmx.2;uc010cmy.2;uc010cmz.2;uc002gie.2;uc010cna.2;uc010cnb.2;uc010cnc.2;uc010cnd.2;uc010vue.1;uc010vuf.1;uc002ghs.1;uc002ght.3;uc002ghy.1;uc002ghz.1;uc002ghj.2;uc002ghk.2;uc002ghl.2;uc0…	100533955;100533955;100533955;112483;112483;26168;26168;26781;407977;6462;6462;6462;6462;6462;6462;6462;6462;6462;6462;6462;6462;6462;6462;6462;6462;6462;6462;6462;6462;652965;652966;6665;6665;8741;8741;8741;8741;8741;8741;8742;8742;9513;9526;9526;9526;9526;9526;968;968	23467;13174;13174;41699;41761;23467;21097;7503;36401;-27949;-27949;-27949;-27949;-27949;-27949;-27949;-41854;-41854;-41854;-41854;-41854;-41854;-44020;-44020;-44020;-44020;-44020;-44020;-44020;10745;8647;3957;4055;27167;27167;27167;27167;27167;27167;36401;36401;28782;0;0;0;0;-354;5971;5971
chr17	7553655	7554308	654	*	Promoter (<=1kb)	17	7554254	7561089	6836	1	482	uc002gif.1	0	ENSG00000129244	ATP1B2	ATPase Na+/K+ transporting subunit beta 2	uc002gib.1;uc002gic.2;uc002gif.1;uc010vuh.2;uc010vui.2;uc002gip.3;uc002giq.3;uc002gir.3;uc010cnl.3;uc010vuj.2;uc010cmo.2;uc010cmp.2;uc010cmq.2;uc010cmr.2;uc010cms.2;uc010cmt.2;uc010cmu.2;uc002gid.3;uc010cmv.2;uc010cmw.2;uc010cmx.2;uc010cmy.2;uc010cmz.2;uc002gie.2;uc010cna.2;uc010cnb.2;uc010cnc.2;uc010cnd.2;uc010vue.1;uc010vuf.1;uc002gig.1;uc002gih.3;uc010cne.1;uc002gii.2;uc010cnf.2;uc010cng.2;uc0…	112483;112483;482;55135;55135;55135;55135;55135;55135;55135;6462;6462;6462;6462;6462;6462;6462;6462;6462;6462;6462;6462;6462;6462;6462;6462;6462;6462;6462;6462;7157;7157;7157;7157;7157;7157;7157;7157;7157;7157;7157;7157;7157;7157;7157;7157;7157;9513	-22523;-22461;0;-35081;-36450;-37359;-37359;-37359;-37359;-49751;36273;36273;36273;36273;36273;36273;36273;22368;22368;22368;22368;22368;22368;20202;20202;20202;20202;20202;20202;20202;25629;25629;22618;24503;24503;24503;25629;36560;36560;36560;36560;36560;24246;36560;36560;36560;36560;-35440
chr17	7739857	7740312	456	*	Distal Intergenic	17	7743235	7758118	14884	1	23135	uc002giw.1	-2923	ENSG00000132510	KDM6B	lysine demethylase 6B	uc002gjd.2;uc002gjb.4;uc002giu.1;uc010cnm.1;uc002giw.1;uc002gix.3;uc002giz.3;uc002gja.3;uc002giy.3	1107;124637;146754;146754;23135;23135;84316;84316;92162	-47811;-20752;116818;32283;-2923;-10552;20568;20860;-18072
chr17	8057312	8057794	483	*	Promoter (1-2kb)	17	8043788	8055753	11966	2	5187	uc002gkd.3	-1559	ENSG00000179094	PER1	period circadian regulator 1	uc021tpw.1;uc021tpv.1;uc010cns.3;uc010vuq.2;uc002gkd.3;uc010vur.1;uc010vus.1;uc010vut.2;uc002gka.3;uc010cnr.3;uc010vuo.2;uc010vup.2;uc010cnt.1;uc002gkg.4;uc002gkh.4;uc002gki.4;uc002gkj.4;uc002gkk.2;uc002gkb.2;uc002gkc.3	100500892;100616406;5187;5187;5187;5187;5187;54785;59344;59344;59344;59344;6844;84314;84314;84314;84314;84314;84667;84667	-32699;-32469;-11803;-3149;-1559;0;-3149;35770;-35505;-35452;-35078;-35078;8499;21920;21920;21920;21920;21920;-29902;-29902
chr17	8531799	8533057	1259	*	Promoter (1-2kb)	17	8377523	8534079	156557	2	4628	uc002gll.4	1022	ENSG00000133026	MYH10	myosin heavy chain 10	uc002gll.4;uc002glm.4;uc010cnx.4	4628;4628;4628	0;0;0
chr17	16097355	16098184	830	*	Promoter (<=1kb)	17	15933408	16097953	164546	2	9611	uc002gpn.3	0	ENSG00000141027	NCOR1	nuclear receptor corepressor 1	uc010vwd.2;uc002gpv.3;uc002gpn.3;uc002gpo.3;uc002gpp.1;uc002gpr.3;uc002gps.2;uc010coz.2;uc010cpa.2;uc010cpb.2;uc002gpu.3	9487;9487;9611;9611;9611;9611;9611;9611;9611;9611;9611	0;0;0;0;0;0;0;0;0;0;0
chr17	16189254	16190050	797	*	Intron (uc010vwd.2/9487, intron 2 of 4)	17	16185328	16185402	75	1	100302124	uc021tqr.1	3926	ENSG00000221355	MIR1288	microRNA 1288	uc021tqr.1;uc010vwd.2;uc002gpv.3	100302124;9487;9487	3926;0;0
chr17	17155048	17156278	1231	*	Intron (uc010vwv.2/8533, intron 9 of 11)	17	17104309	17140502	36194	2	201164	uc010cpn.3	-14546	ENSG00000179598	PLD6	phospholipase D family member 6	uc002gra.4;uc002grb.4;uc002grc.2;uc002gqz.3;uc010cpn.3;uc010vwv.2;uc002grd.3;uc010vww.2	201163;201163;201163;201164;201164;8533;8533;8533	-14546;-14546;-14546;-45402;-14546;0;0;0
chr17	17726957	17727808	852	*	Promoter (<=1kb)	17	17714663	17726944	12282	2	6720	uc002grs.2	-13	ENSG00000072310	SREBF1	sterol regulatory element binding transcription factor 1	uc002grm.3;uc002grn.1;uc010cpo.1;uc002gry.4;uc002grz.4;uc010cpr.3;uc010vwy.2;uc010vwz.2;uc010vxa.2;uc010vxb.2;uc002grp.2;uc002grq.2;uc002grr.2;uc002grs.2;uc002grt.2;uc002gru.2;uc010cpp.1;uc010cpq.1;uc021trh.1	10743;10743;140771;146691;146691;146691;146691;146691;146691;146691;6720;6720;6720;6720;6720;6720;6720;6720;693120	142170;41511;-44114;147976;147976;147976;147976;147976;147976;147976;-5269;-2779;-2779;-13;0;0;-36;0;-9712
chr17	18066874	18067375	502	*	5' UTR	17	18064631	18082536	17906	1	51168	uc010cpv.3	2243	ENSG00000091536	MYO15A	myosin XVA	uc021trl.1;uc021trm.1;uc010vxi.2;uc010vxj.1;uc010vxk.1;uc010vxl.1;uc002gsl.3;uc010vxm.2;uc002gsm.1;uc010cpv.3;uc010cpw.3	51168;51168;51168;51168;51168;51168;51168;51168;51168;51168;54890	0;0;0;9506;0;0;0;0;0;0;-19492
chr17	19173959	19175019	1061	*	Promoter (<=1kb)	17	19174706	19177701	2996	1	100874309	uc031qzf.1	0	NA	EPN2-IT1	EPN2 intronic transcript 1	uc031qzg.1;uc031qzf.1;uc002gvc.2;uc010vyn.1;uc010cql.1;uc002gvd.4;uc002gve.4;uc002gvf.4;uc010vyo.2;uc002gvh.1;uc010vyp.2;uc010vyq.2;uc002gvj.3	100874018;100874309;22905;22905;22905;22905;22905;22905;22905;22905;22905;22905;22905	34555;0;0;0;0;0;0;0;0;-11244;-11244;-11244;-41420
chr17	21197559	21199152	1594	*	Promoter (<=1kb)	17	21198987	21218551	19565	1	5606	uc021tsr.1	0	ENSG00000034152	MAP2K3	mitogen-activated protein kinase kinase 3	uc010vzx.2;uc002gys.3;uc002gyt.3;uc021tsq.1;uc021tsr.1	256302;5606;5606;5606;5606	-40981;0;0;0;0
chr17	25620959	25621311	353	*	Promoter (<=1kb)	17	25620936	25621022	87	2	100616277	uc021ttf.1	0	ENSG00000263583	MIR4522	microRNA 4522	uc021ttf.1;uc010vzy.1;uc010crf.1;uc010vzz.1;uc002gzd.1;uc002gze.1;uc002gzf.1	100616277;26118;26118;26118;26118;26118;26118	0;0;0;0;0;0;0
chr17	25900783	25901696	914	*	Intron (uc002gzj.1/8844, intron 2 of 15)	17	25904518	25950718	46201	1	8844	uc031qzj.1	-2822	ENSG00000141068	KSR1	kinase suppressor of ras 1	uc002gzj.1;uc031qzi.1;uc002gzl.1;uc031qzj.1;uc002gzm.3;uc002gzn.3	8844;8844;8844;8844;8844;8844	0;0;0;-2822;-13805;-35244
chr17	26294809	26295911	1103	*	Distal Intergenic	17	26369688	26523404	153717	1	51701	uc010crj.3	-73777	ENSG00000087095	NLK	nemo like kinase	NA	NA	NA
chr17	27191916	27193089	1174	*	Distal Intergenic	17	27188673	27188748	76	2	100616385	uc021ttx.1	-3168	ENSG00000284085	MIR4732	microRNA 4732	uc021ttw.1;uc021ttx.1;uc002hdd.4;uc002hde.4;uc010wba.2;uc002hdc.3;uc002hcx.1;uc002hcy.1;uc002hcz.1;uc002hda.1;uc010waz.1;uc010wax.1;uc010way.1;uc002hcw.3;uc021ttv.1;uc010wbb.1;uc002hdg.1;uc002hdh.1;uc002hdi.1;uc002hdj.1;uc010crw.1	100616273;100616385;147015;147015;147015;2319;26284;26284;26284;26284;406936;55731;55731;55731;574411;57649;57649;57649;57649;57649;57649	3527;-3168;36886;37000;37000;31626;9873;9873;9873;7159;-3280;-22075;-22075;-22075;-3458;84200;85419;59601;85419;85419;85419
chr17	27506007	27506766	760	*	Promoter (<=1kb)	17	27400528	27507407	106880	2	399687	uc002hdt.1	641	ENSG00000196535	MYO18A	myosin XVIIIA	uc002hds.2;uc010csa.1;uc002hdt.1;uc002hdu.1;uc010wbd.1	399687;399687;399687;399687;399687	-38603;-2237;0;0;-38603
chr17	31224185	31225503	1319	*	Distal Intergenic	17	31086830	31203902	117073	2	4642	uc010wcb.2	-20283	ENSG00000176658	MYO1D	myosin ID	uc002hhq.3;uc002hhr.3;uc002hho.1;uc002hhp.1;uc010wcb.2	26022;26022;4642;4642;4642	-29425;-29425;-20283;-20283;-20283
chr17	31224185	31225503	1319	*	Distal Intergenic	17	31086830	31203902	117073	2	4642	uc010wcb.2	-20283	ENSG00000176658	MYO1D	myosin ID	uc002hhq.3;uc002hhr.3;uc002hho.1;uc002hhp.1;uc010wcb.2	26022;26022;4642;4642;4642	-29425;-29425;-20283;-20283;-20283
chr17	33887477	33888398	922	*	Distal Intergenic	17	33875144	33885110	9967	2	342618	uc010ctu.1	-2367	ENSG00000236320	SLFN14	schlafen family member 14	uc002hjn.3;uc002hjq.3;uc002hjr.3;uc002hjs.3;uc010wci.2;uc002hjt.3;uc010ctv.3;uc010ctu.1;uc002hjp.3;uc002hjo.1	100506736;163;163;163;163;163;163;342618;5193;692076	-22762;-25884;-25884;-25884;-25884;-26136;-26175;-2367;17258;-12278
chr17	35083953	35085544	1592	*	Distal Intergenic	17	34958391	34965407	7017	1	79922	uc002hnf.3	125562	ENSG00000278619	MRM1	mitochondrial rRNA methyltransferase 1	NA	NA	NA
chr17	37823429	37824567	1139	*	Promoter (<=1kb)	17	37824234	37826728	2495	1	5409	uc031qzz.1	0	ENSG00000141744	PNMT	phenylethanolamine N-methyltransferase	uc010weg.2;uc002hsd.3;uc002hse.3;uc010weh.2;uc010wei.2;uc002hsf.3;uc031raa.1;uc002hsl.3;uc002hsm.3;uc010cwa.3;uc002hsn.1;uc002hso.3;uc002hsp.3;uc010cwb.3;uc010wek.2;uc031qzz.1;uc002hsi.2;uc002hrz.3;uc010cvx.3;uc002hsb.3;uc002hsc.3;uc002hsh.3;uc010cvy.3;uc002hsj.3;uc002hsk.3;uc010cvz.3;uc010wej.2	10948;10948;10948;10948;10948;10948;2064;2064;2064;2064;2064;2064;2064;2064;2064;5409;5409;84152;84152;84152;84152;8557;93210;93210;93210;93210;93210	30096;30096;30096;30096;30096;14078;-19826;-19826;-19826;-19826;-31687;-31687;-31687;-31687;-31687;0;-139;40252;40252;38678;38678;1830;16435;19743;19743;19743;19743
chr17	40094173	40095289	1117	*	Exon (uc002hyj.4/83538, exon 6 of 11)	17	40086888	40117668	30781	1	83538	uc002hyj.4	7285	ENSG00000204815	ODAD4	outer dynein arm docking complex subunit 4	uc002hyl.1;uc002hym.1;uc010wfz.1;uc010wga.1;uc002hyg.3;uc002hyh.3;uc002hyi.3;uc010wfx.2;uc010wfy.2;uc010wgb.2;uc002hyo.3;uc002hyp.3;uc010wgc.2;uc010cxw.3;uc021txp.1;uc002hyj.4	1267;1267;1267;1267;47;47;47;47;47;7266;7266;7266;7266;7266;83538;83538	-23470;-23470;-23470;-23470;-18901;-18901;-18901;-18901;-18901;73894;74426;74426;74426;73894;0;0
chr17	40464330	40465468	1139	*	3' UTR	17	40458134	40461704	3571	1	6776	uc010cye.1	6196	ENSG00000126561	STAT5A	signal transducer and activator of transcription 5A	uc002hzk.1;uc002hzl.1;uc002hzm.1;uc002hzn.1;uc010wgh.1;uc002hzj.2;uc010cya.2;uc010cyb.2;uc010cyc.2;uc010cyd.1;uc010cye.1;uc002hzh.3;uc002hzi.3	6774;6774;6774;6774;6774;6776;6776;6776;6776;6776;6776;6777;6777	0;0;0;0;0;24765;24445;24256;24256;6196;6196;-35906;-35906
chr17	40471632	40472635	1004	*	Intron (uc002hzk.1/6774, intron 21 of 23)	17	40458134	40461704	3571	1	6776	uc010cye.1	13498	ENSG00000126561	STAT5A	signal transducer and activator of transcription 5A	uc002hzk.1;uc002hzl.1;uc002hzm.1;uc002hzn.1;uc010wgh.1;uc002hzj.2;uc010cya.2;uc010cyb.2;uc010cyc.2;uc010cyd.1;uc010cye.1;uc002hzh.3;uc002hzi.3	6774;6774;6774;6774;6774;6776;6776;6776;6776;6776;6776;6777;6777	0;0;0;0;0;32067;31747;31558;31558;13498;13498;-43208;-43208
chr17	40850721	40851691	971	*	3' UTR	17	40834632	40852011	17380	1	8506	uc010wgs.2	16089	ENSG00000108797	CNTNAP1	contactin associated protein 1	uc002iaz.3;uc002iba.3;uc010wgt.2;uc010wgu.2;uc010wgv.2;uc010wgw.2;uc010cyo.1;uc010cyp.2;uc010cyq.2;uc010cyr.1;uc010cys.2;uc010wgr.2;uc002iap.3;uc002iax.4;uc002iat.2;uc002iau.3;uc002iav.3;uc002iaw.2;uc002iay.3;uc010wgs.2	2145;2145;2145;2145;2145;2145;2145;2145;2145;2145;2145;27175;27175;2826;79990;79990;79990;79990;8506;8506	45380;45380;45380;45380;45380;45380;23242;45380;45380;20776;45380;39455;39396;-16876;-22613;-21673;-21673;-21673;0;0
chr17	41428077	41428886	810	*	Distal Intergenic	17	41447213	41466266	19054	2	100130581	uc010wib.1	37380	ENSG00000188825	LINC00910	long intergenic non-protein coding RNA 910	uc010wib.1;uc010czf.3;uc010wid.2;uc010wie.2;uc031ras.1;uc002idt.3	100130581;100130581;100130581;100130581;100874261;379	37380;37380;37380;37380;-47015;-47467
chr17	42322666	42324095	1430	*	Distal Intergenic	17	42325758	42340302	14545	2	6521	uc021tyc.1	16207	ENSG00000004939	SLC4A1	solute carrier family 4 member 1 (Diego blood group)	uc010wiv.2;uc002ifz.3;uc002iga.3;uc021tyc.1;uc002igf.4;uc002igc.3;uc010czs.3;uc002igd.3;uc010czt.3;uc002ige.2	56970;56970;56970;6521;6521;7343;7343;7343;7343;7343	-49811;-47137;-47137;16207;0;-25625;-25625;-24416;-23672;-26796
chr17	42343574	42344841	1268	*	Promoter (<=1kb)	17	42325758	42345502	19745	2	6521	uc002igf.4	661	ENSG00000004939	SLC4A1	solute carrier family 4 member 1 (Diego blood group)	uc002igi.3;uc002igj.3;uc002igl.4;uc021tyc.1;uc002igf.4;uc002igc.3;uc010czs.3;uc002igd.3;uc010czt.3;uc002ige.2	10900;10900;10900;6521;6521;7343;7343;7343;7343;7343	-41086;-41086;-41086;-3272;0;-46533;-46533;-45324;-44580;-47704
chr17	42358702	42359582	881	*	Distal Intergenic	17	42325758	42345502	19745	2	6521	uc002igf.4	-13200	ENSG00000004939	SLC4A1	solute carrier family 4 member 1 (Diego blood group)	uc002igi.3;uc002igj.3;uc002igl.4;uc002igm.2;uc002ign.2;uc010wiw.1;uc010wix.1;uc010wiy.1;uc021tyc.1;uc002igf.4	10900;10900;10900;51629;51629;51629;51629;51629;6521;6521	-26345;-26345;-26345;42635;42635;42635;42635;42635;-18400;0
chr17	42360661	42361909	1249	*	Distal Intergenic	17	42325758	42345502	19745	2	6521	uc002igf.4	-15159	ENSG00000004939	SLC4A1	solute carrier family 4 member 1 (Diego blood group)	uc002igi.3;uc002igj.3;uc002igl.4;uc002igm.2;uc002ign.2;uc010wiw.1;uc010wix.1;uc010wiy.1;uc021tyc.1;uc002igf.4	10900;10900;10900;51629;51629;51629;51629;51629;6521;6521	-24018;-24018;-24018;40308;40308;40308;40308;40308;-20359;0
chr17	42365436	42366564	1129	*	Distal Intergenic	17	42385927	42395238	9312	1	10900	uc002igi.3	-19363	ENSG00000108309	RUNDC3A	RUN domain containing 3A	uc002igi.3;uc002igj.3;uc002igl.4;uc002igm.2;uc002ign.2;uc010wiw.1;uc010wix.1;uc010wiy.1;uc021tyc.1;uc002igf.4	10900;10900;10900;51629;51629;51629;51629;51629;6521;6521	-19363;-19363;-19363;35653;35653;35653;35653;35653;-25134;0
chr17	45266214	45267456	1243	*	Promoter (<=1kb)	17	45195311	45266665	71355	2	996	uc002ild.4	0	ENSG00000004897	CDC27	cell division cycle 27	uc002ilg.3;uc002ilh.3;uc002ild.4;uc002ile.4;uc002ilf.4;uc010wkp.2;uc010wkq.1	4635;4635;996;996;996;996;996	-18972;-19258;0;0;0;0;0
chr17	46013081	46013828	748	*	Distal Intergenic	17	46018889	46026674	7786	1	55163	uc002imo.3	-5061	ENSG00000108439	PNPO	pyridoxamine 5'-phosphate oxidase	uc002imo.3;uc010wkz.2;uc010wla.2;uc010wlb.2;uc002imk.3;uc002iml.3;uc002imp.4;uc010wlc.3;uc002imq.2;uc002imr.4;uc002ims.4;uc031rda.1	55163;55163;55163;55163;6668;6668;79170;80279;80279;80279;80279;80279	-5061;-5061;-5061;-5061;39565;38107;21415;-34066;-34494;-34494;-34494;-34494
chr17	46624055	46625186	1132	*	Promoter (1-2kb)	17	46620019	46622393	2375	2	3212	uc002inm.3	-1662	ENSG00000173917	HOXB2	homeobox B2	uc031rdb.1;uc002ink.1;uc002inm.3;uc002inn.3;uc002ino.3;uc010wlk.2;uc010wll.2;uc010dbf.3;uc010dbg.3;uc010wlm.2;uc002inp.3;uc002inr.3;uc002ins.1;uc010dbh.1;uc021tzg.2;uc021tzh.1;uc021tzi.1;uc021tzj.1;uc021tzk.1;uc002inq.3	100874362;3211;3212;3213;3213;3213;3213;3213;3213;3213;3214;3215;3216;3216;404266;404266;404266;404266;404266;406902	0;-15783;-1662;5050;26624;27252;34630;42445;42445;42445;30557;45917;57148;57168;-42637;-42637;-44468;-44468;-48134;32123
chr17	47318995	47319559	565	*	Distal Intergenic	17	47325605	47333811	8207	1	124871	uc002iot.2	-6046	ENSG00000177369	FLJ40194	uncharacterized FLJ40194	uc002iot.2;uc021tzs.1;uc002ios.2;uc010wlv.1;uc002iov.4;uc002iow.3;uc002iou.4;uc002ioo.2;uc021tzo.1;uc021tzp.1;uc021tzq.1;uc002iop.1;uc002ioq.1	124871;124871;162466;162466;22834;22834;22834;2793;2793;2793;2793;51225;51225	0;0;-10867;-10867;119917;120276;119917;-32252;-32233;-32233;-31059;31406;31406
chr17	47326269	47327297	1029	*	Promoter (<=1kb)	17	47325605	47336027	10423	1	124871	uc021tzs.1	664	ENSG00000177369	FLJ40194	uncharacterized FLJ40194	uc002iot.2;uc021tzs.1;uc002ios.2;uc010wlv.1;uc002iov.4;uc002iow.3;uc002iou.4;uc002ioo.2;uc021tzo.1;uc021tzp.1;uc021tzq.1;uc002iop.1;uc002ioq.1	124871;124871;162466;162466;22834;22834;22834;2793;2793;2793;2793;51225;51225	0;0;-18141;-18141;112179;112538;112179;-39526;-39507;-39507;-38333;38680;38680
chr17	47816661	47818121	1461	*	Intron (uc002ipk.3/81558, intron 1 of 7)	17	47787687	47841518	53832	2	81558	uc002ipk.3	23397	ENSG00000121104	FAM117A	family with sequence similarity 117 member A	uc002iph.1;uc002ipj.1;uc010wly.1;uc002ipl.2;uc002ipm.3;uc010wma.2;uc010wmb.2;uc010wmc.2;uc010wmd.2;uc010wme.2;uc002ipk.3;uc010wlz.2	10237;10237;10237;11143;11143;11143;11143;11143;11143;11143;81558;81558	-31379;-31133;-31379;-47860;-47860;-47860;-47860;-47860;-48688;-48688;0;0
chr17	48230864	48231711	848	*	Distal Intergenic	17	48211101	48227877	16777	2	84687	uc002iqh.4	-2987	ENSG00000108819	PPP1R9B	protein phosphatase 1 regulatory subunit 9B	uc002iqm.3;uc031rdc.1;uc002iqe.4;uc002iqf.4;uc002iqg.4;uc010wmj.2;uc002iqb.3;uc021tzw.1;uc002iqc.3;uc021tzx.1;uc010wmh.1;uc002iqi.3;uc002iqj.3;uc010wmi.2;uc002iqh.4	1277;1277;201191;201191;201191;373861;5164;5164;5164;5164;6442;6442;6442;6442;84687	47289;47289;-29342;-23618;-23618;18126;58763;58225;58225;57805;-11655;-11655;-11655;-11655;-2987
chr17	49021678	49022359	682	*	Distal Intergenic	17	48939587	48945339	5753	2	10140	uc010wmz.2	-76339	ENSG00000141232	TOB1	transducer of ERBB2, 1	uc002ita.3;uc002itb.3;uc002itc.3;uc002itd.3;uc002ite.3;uc002itf.3	9043;9043;9043;9043;9043;9043	101970;175867;175867;175867;102471;134706
chr17	53528533	53529212	680	*	Distal Intergenic	17	53469974	53499341	29368	2	23531	uc002iui.3	-29192	ENSG00000108960	MMD	monocyte to macrophage differentiation associated	uc002iui.3	23531	-29192
chr17	57367025	57368374	1350	*	Distal Intergenic	17	57409053	57433664	24612	1	388403	uc002ixl.1	-40679	ENSG00000175155	YPEL2	yippee like 2	uc002ixj.3;uc002ixk.2;uc021uas.1;uc002ixl.1;uc002ixm.1	284161;284161;284161;388403;388403	69197;69197;69197;-40679;-40679
chr17	60220632	60221675	1044	*	Distal Intergenic	17	60019966	60142643	122678	2	9969	uc002izo.3	-77989	ENSG00000108510	MED13	mediator complex subunit 13	NA	NA	NA
chr17	63169412	63170580	1169	*	Intron (uc021ubw.1/8787, intron 8 of 16)	17	63184822	63223821	39000	1	8787	uc002jfg.3	-14242	ENSG00000108370	RGS9	regulator of G protein signaling 9	uc021ubw.1;uc010dem.3;uc002jfd.3;uc002jfe.3;uc002jfg.3	8787;8787;8787;8787;8787	0;0;0;0;-14242
chr17	73631456	73632362	907	*	Promoter (1-2kb)	17	73629514	73637486	7973	1	643008	uc002jow.2	1942	ENSG00000204323	SMIM5	small integral membrane protein 5	uc002joy.3;uc010dgm.1;uc010wsf.1;uc002jpe.3;uc002jpf.3;uc021udb.1;uc002jow.2;uc002jom.1;uc002jon.1;uc002joo.1;uc010dgh.3;uc010wse.2;uc002joq.4;uc010dgi.1;uc002jor.1;uc010dgj.1;uc002jos.4;uc002jot.4;uc010dgk.3;uc010dgl.3;uc002joz.4;uc002jpa.4;uc002jpb.2	100130933;29115;29115;29115;29115;29115;643008;80022;80022;80022;80022;80022;80022;80022;80022;80022;80022;9400;9400;9400;9400;9400;9400	-10284;-31037;0;0;0;0;0;47317;47317;47317;47317;47317;33172;32545;22401;15738;14909;-6502;0;0;30891;30907;30907
chr17	73703118	73703758	641	*	3' UTR	17	73717516	73753899	36384	1	3691	uc002jpg.3	-13758	ENSG00000132470	ITGB4	integrin subunit beta 4	uc010dgm.1;uc010wsf.1;uc002jpe.3;uc002jpf.3;uc021udb.1;uc002jpg.3;uc002jph.3;uc010dgo.3;uc002jpi.4;uc010dgp.1;uc002jpj.3;uc010wsh.1;uc010dgk.3;uc010dgl.3;uc002joz.4;uc002jpa.4;uc002jpb.2	29115;29115;29115;29115;29115;3691;3691;3691;3691;3691;3691;3691;9400;9400;9400;9400;9400	39719;0;0;0;0;-13758;-13758;-13831;-13831;-17016;-17016;-24135;0;0;-39865;-39849;-39849
chr17	74712022	74713203	1182	*	3' UTR	17	74675651	74707056	31406	2	439921	uc002jsm.3	-4966	ENSG00000182534	MXRA7	matrix remodeling associated 7	uc002jsr.3;uc002jst.3;uc002jsu.3;uc021udk.1;uc021udl.1;uc021udm.1;uc021udn.1;uc002jsn.1;uc002jso.3;uc002jsk.1;uc031rel.1;uc002jsl.3;uc002jsm.3;uc010wtg.2;uc002jsv.3;uc002jsy.4;uc002jsw.2;uc021udo.1;uc002jsz.1;uc002jta.2;uc002jtb.3;uc002jtc.3;uc002jtd.4;uc002jte.3;uc010dha.3;uc010dhb.3	124512;124512;124512;124512;124512;124512;124512;23210;23210;439921;439921;439921;439921;6427;6427;6427;6427;693221;79157;79157;79157;79157;79157;79157;79157;79157	-9709;-9709;-9709;-9709;-9709;-9709;-9709;0;9678;-4966;-25721;-4966;-4966;20210;20290;20290;19343;19427;-19069;-19069;-20380;-20380;-20380;-20380;-20380;-20380
chr17	75066348	75067248	901	*	Distal Intergenic	17	75082798	75095278	12481	1	654434	uc021udp.1	-15550	ENSG00000234912	SNHG20	small nucleolar RNA host gene 20	uc021udv.1;uc021udw.1;uc021udx.1;uc021udp.1;uc021udq.1;uc021udr.1;uc021uds.1;uc021udt.1;uc021udu.1;uc002jtl.3	6397;6397;6397;654434;654434;654434;654434;654434;654434;677781	-17477;-17477;-17987;-15550;-15550;-17477;-17477;-17477;-17477;-18141
chr17	76124848	76125746	899	*	Promoter (<=1kb)	17	76108999	76124853	15855	2	11322	uc010dhf.1	0	ENSG00000141524	TMC6	transmembrane channel like 6	uc002juh.3;uc002jus.4;uc010wts.1;uc002jui.1;uc002juj.1;uc010dhf.1;uc002juk.2;uc010dhg.1;uc002jul.1;uc002jum.4;uc002jun.4;uc002juo.2;uc010wtp.1;uc010wtq.1;uc010dhh.1;uc002jup.2;uc002juq.2;uc010wtr.1;uc002jur.1;uc002jud.2;uc002juf.2;uc002juw.2;uc002jut.3;uc002juu.1	100131096;100141515;100141515;11322;11322;11322;11322;11322;11322;11322;11322;11322;11322;11322;147138;147138;147138;147138;147138;57690;57690;7083;9144;9144	-16968;-16688;-30399;-6018;-1809;0;0;0;0;-2883;0;0;-2883;0;-1113;-1113;-1113;-4729;-8173;124530;124530;57539;-38925;-38925
chr17	77899823	77900496	674	*	Distal Intergenic	17	77906142	77924656	18515	2	125058	uc002jxg.2	24160	ENSG00000167291	TBC1D16	TBC1 domain family member 16	uc002jxg.2;uc002jxi.4;uc002jxj.4;uc002jxk.2	125058;125058;125058;125058	24160;24160;109161;24160
chr17	79030746	79031553	808	*	Intron (uc002jyz.4/10458, intron 2 of 12)	17	79008947	79091232	82286	1	10458	uc010wuh.1	21799	ENSG00000175866	BAIAP2	BAR/IMD domain containing adaptor protein 2	uc002jyz.4;uc002jza.2;uc002jzb.2;uc002jzc.2;uc002jzd.2;uc002jze.2;uc002jzf.2;uc002jzg.2;uc010wuh.1;uc002jzh.2;uc010wui.2;uc002jyy.2	10458;10458;10458;10458;10458;10458;10458;10458;10458;10458;10458;440465	0;0;0;0;0;0;0;0;0;-27342;-40365;-22227
chr17	79889734	79890705	972	*	3' UTR	17	79891482	79893392	1911	2	5831	uc010wve.1	2687	ENSG00000183010	PYCR1	pyrroline-5-carboxylate reductase 1	uc002kbu.2;uc010wvg.2;uc010wvf.1;uc002kcd.3;uc002kcm.3;uc002kcn.3;uc002kbv.1;uc002kbw.1;uc002kbx.1;uc002kby.1;uc002kbz.1;uc002kca.1;uc002kcb.1;uc002kcc.1;uc010dih.1;uc002kcj.2;uc002kcp.3;uc002kcr.1;uc010wvd.1;uc002kct.1;uc002kcu.1;uc010wve.1;uc002kce.2;uc010wvb.2;uc002kcf.2;uc002kch.2;uc002kci.2;uc010wvc.2;uc031rex.1;uc002kcx.3;uc002kcy.3;uc002kda.3;uc021ufj.1;uc002kdb.1;uc021ufh.1;uc002kco.4	10189;147111;255275;256933;4097;4097;51529;51529;51529;51529;51529;51529;51529;51529;51529;51547;5831;5831;5831;5831;5831;5831;5833;5833;5833;5833;5833;5833;5833;79058;79058;79058;79058;79058;92659;92659	-40272;28352;14404;29662;-8290;-4147;40135;40135;40135;40135;40135;40135;40135;39916;37426;-13676;0;0;0;0;0;2687;-20657;-20657;-20394;-20394;-20394;-20394;-20394;-44721;-44721;-44721;-44721;-45357;4029;4029
chr17	80419156	80420538	1383	*	Intron (uc002kff.4/26502, intron 2 of 10)	17	80416540	80446143	29604	1	26502	uc010dit.3	2616	ENSG00000141562	NARF	nuclear prelamin A recognition factor	uc002kff.4;uc010wvo.1;uc010wvp.1;uc002kfg.4;uc002kfj.4;uc010dit.3;uc002kev.4;uc002kew.3;uc010wvm.2;uc010wvn.1;uc002kex.3;uc031rez.1;uc002key.3;uc021ufq.1;uc002kfa.3;uc002kfb.4;uc002kfc.4;uc002kfd.4;uc002kfe.4;uc010dir.3;uc021ufr.1;uc021ufs.1;uc021uft.1;uc021ufu.1;uc010dis.2;uc021ufv.1;uc002ket.2;uc002keu.2;uc010dip.2	26502;26502;26502;26502;26502;26502;284004;284004;284004;284004;79415;79415;79415;79415;79415;79415;79415;79415;79415;79415;79415;79415;79415;79415;79415;79415;79701;79701;79701	0;0;0;0;0;0;42904;41531;27622;24153;-16094;-13227;-13019;-11554;-10449;-10449;-10449;-10449;-10449;-10449;-10449;-10449;-10449;-10449;-10449;-10449;-42643;-42643;-42643
chr17	80696002	80697245	1244	*	Promoter (<=1kb)	17	80695577	80707771	12195	1	64122	uc002kfw.1	425	ENSG00000167363	FN3K	fructosamine 3 kinase	uc002kfs.3;uc002kft.3;uc010wvq.1;uc010wvs.1;uc002kfw.1;uc002kfx.1;uc002kfy.1;uc002kfz.3;uc002kfu.3;uc010wvr.2	10966;10966;10966;64122;64122;6904;6904;6904;79672;79672	-41568;-39404;-39404;0;0;-12695;-12695;-12695;21420;21420
chr17	81188727	81191157	2431	*	Downstream (<=300bp)	17	81174666	81188573	13908	1	388574	uc021ufy.1	14061	ENSG00000293087	RPL23AP87	ribosomal protein L23a pseudogene 87	uc021ufy.1	388574	14061
chr18	3652404	3654223	1820	*	Intron (uc002kme.2/9229, intron 4 of 9)	18	3594112	3597377	3266	1	649446	uc010wza.3	58292	NA	DLGAP1-AS1	DLGAP1 antisense RNA 1	uc002kme.2;uc010dkn.3;uc010wyw.2;uc010wyx.2;uc010wyy.2;uc002kmf.3;uc002kmg.3;uc010wyz.2	9229;9229;9229;9229;9229;9229;9229;9229	0;0;0;0;0;0;0;0
chr18	3652404	3654223	1820	*	Intron (uc002kme.2/9229, intron 4 of 9)	18	3594112	3597377	3266	1	649446	uc010wza.3	58292	NA	DLGAP1-AS1	DLGAP1 antisense RNA 1	uc002kme.2;uc010dkn.3;uc010wyw.2;uc010wyx.2;uc010wyy.2;uc002kmf.3;uc002kmg.3;uc010wyz.2	9229;9229;9229;9229;9229;9229;9229;9229	0;0;0;0;0;0;0;0
chr18	12302295	12303102	808	*	Distal Intergenic	18	12308240	12326568	18329	1	84617	uc002kqv.3	-5138	ENSG00000176014	TUBB6	tubulin beta 6 class V	uc002kqz.2;uc002kqt.4;uc002kqu.4;uc010dlc.3;uc002kqv.3;uc010dld.3;uc002kqw.3;uc002kqy.3	10939;1149;1149;1149;84617;84617;84617;84617	74173;47977;47935;47935;-5138;-5155;-5155;-5155
chr18	33077701	33078233	533	*	Promoter (<=1kb)	18	33033290	33077955	44666	2	125476	uc002kyw.1	0	ENSG00000153391	INO80C	INO80 complex subunit C	uc002kyw.1;uc002kyx.4;uc002kyy.4;uc010dmt.3	125476;125476;125476;125476	0;-139;0;0
chr18	43732454	43733962	1509	*	Distal Intergenic	18	43753988	43846955	92968	1	147339	uc002lbw.3	-20026	ENSG00000152242	ARK2N	arkadia (RNF111) N-terminal like PKA signaling regulator 2N	uc002lbu.3;uc002lbv.3;uc002lbw.3;uc002lbx.3;uc002lbt.1	115106;115106;147339;147339;498	48156;48156;-20026;-20026;-48255
chr18	43732454	43733962	1509	*	Distal Intergenic	18	43753988	43846955	92968	1	147339	uc002lbw.3	-20026	ENSG00000152242	ARK2N	arkadia (RNF111) N-terminal like PKA signaling regulator 2N	uc002lbu.3;uc002lbv.3;uc002lbw.3;uc002lbx.3;uc002lbt.1	115106;115106;147339;147339;498	48156;48156;-20026;-20026;-48255
chr18	52613171	52614275	1105	*	Intron (uc002lfs.3/80323, intron 1 of 11)	18	52568740	52625279	56540	2	80323	uc002lfs.3	11004	ENSG00000166510	CCDC68	coiled-coil domain containing 68	uc002lfs.3;uc002lft.3	80323;80323	0;0
chr18	55333328	55334653	1326	*	Exon (uc002lgw.3/5205, exon 20 of 28)	18	55306687	55405276	98590	1	100505549	uc002lgv.1	26641	ENSG00000267040	ATP8B1-AS1	ATP8B1 antisense RNA 1	uc002lgu.2;uc002lgv.1;uc002lgs.2;uc010xea.1;uc010xeb.1;uc010xec.2;uc010xed.2;uc002lgw.3	100505549;100505549;4677;4677;4677;4677;4677;5205	0;0;-44151;-44151;-44151;-44151;-44151;0
chr18	55745914	55746758	845	*	Intron (uc002lgx.3/23327, intron 1 of 29)	18	55714458	56068772	354315	1	23327	uc010xee.1	31456	ENSG00000049759	NEDD4L	NEDD4 like E3 ubiquitin protein ligase	uc002lgx.3;uc002lgy.3;uc002lgz.3;uc002lha.1;uc010xee.1	23327;23327;23327;23327;23327	0;0;0;0;0
chr18	57585438	57586185	748	*	Distal Intergenic	18	57567192	57571538	4347	1	5366	uc002lid.2	18246	ENSG00000141682	PMAIP1	phorbol-12-myristate-13-acetate-induced protein 1	uc002lic.2;uc002lid.2	5366;5366	18246;18246
chr18	57624580	57625742	1163	*	Distal Intergenic	18	57567192	57571538	4347	1	5366	uc002lid.2	57388	ENSG00000141682	PMAIP1	phorbol-12-myristate-13-acetate-induced protein 1	NA	NA	NA
chr18	60117554	60118674	1121	*	Distal Intergenic	18	60190658	60245818	55161	1	54877	uc002lip.4	-71984	ENSG00000141664	ZCCHC2	zinc finger CCHC-type containing 2	NA	NA	NA
chr18	71909195	71910908	1714	*	Distal Intergenic	18	71920527	71959251	38725	2	1528	uc002llh.3	48343	ENSG00000166347	CYB5A	cytochrome b5 type A	uc002llh.3;uc002lli.3;uc021ull.1	1528;1528;1528	48343;48343;48343
chr18	74818164	74818919	756	*	Intron (uc010xfd.2/4155, intron 1 of 8)	18	74690789	74844774	153986	2	4155	uc010xfd.2	25855	ENSG00000197971	MBP	myelin basic protein	uc010xfd.2;uc002lmr.3	4155;4155	0;0
chr18	77263916	77265822	1907	*	Intron (uc002lnd.3/4772, intron 9 of 9)	18	77287119	77289323	2205	1	4772	uc010drc.3	-21297	ENSG00000131196	NFATC1	nuclear factor of activated T cells 1	uc002lnc.1;uc010xff.1;uc002lnd.3;uc002lne.3;uc010xfg.2;uc010xfh.2;uc010xfi.1;uc002lnf.3;uc002lng.3;uc010xfj.2;uc010xfk.2;uc010drc.3	4772;4772;4772;4772;4772;4772;4772;4772;4772;4772;4772;4772	108144;108144;0;0;0;0;103590;0;0;0;0;0
chr18	77266765	77267667	903	*	Intron (uc002lnd.3/4772, intron 9 of 9)	18	77287119	77289323	2205	1	4772	uc010drc.3	-19452	ENSG00000131196	NFATC1	nuclear factor of activated T cells 1	uc002lnc.1;uc010xff.1;uc002lnd.3;uc002lne.3;uc010xfg.2;uc010xfh.2;uc010xfi.1;uc002lnf.3;uc002lng.3;uc010xfj.2;uc010xfk.2;uc010drc.3	4772;4772;4772;4772;4772;4772;4772;4772;4772;4772;4772;4772	110993;110993;0;0;0;0;106439;0;0;0;0;0
chr18	77286176	77287532	1357	*	Promoter (<=1kb)	18	77287119	77289323	2205	1	4772	uc010drc.3	0	ENSG00000131196	NFATC1	nuclear factor of activated T cells 1	uc002lnd.3;uc002lne.3;uc010xfg.2;uc010xfh.2;uc002lnf.3;uc002lng.3;uc010xfj.2;uc010xfk.2;uc010drc.3	4772;4772;4772;4772;4772;4772;4772;4772;4772	0;0;0;0;0;0;0;0;0
chr18	77702723	77703773	1051	*	5' UTR	18	77662420	77711025	48606	2	80148	uc010dre.2	7252	ENSG00000122490	SLC66A2	solute carrier family 66 member 2	uc002lnp.3;uc002lnr.3;uc010drf.3;uc010drg.3;uc010xfl.2;uc002lno.4;uc010dre.2;uc002lnk.2;uc002lnl.2;uc010xfm.1	10907;10907;10907;10907;26251;440498;80148;80148;80148;80148	44759;44759;44759;90142;79055;-20809;0;0;0;0
chr19	73878	74784	907	*	Distal Intergenic	19	76220	77690	1471	2	641702	uc002loa.3	2906	ENSG00000282591	FAM138F	family with sequence similarity 138 member F	uc010drk.1;uc002loa.3;uc002loc.1	375690;641702;81099	-2912;2906;-35895
chr19	516456	517240	785	*	Intron (uc002lou.3/91978, intron 1 of 1)	19	507497	519654	12158	1	91978	uc002lou.3	8959	ENSG00000141933	TPGS1	tubulin polyglutamylase complex subunit 1	uc002lor.3;uc010drp.3;uc002low.2;uc031rit.1;uc002los.3;uc002lot.3;uc010drq.3;uc002lou.3;uc002lov.3	284451;284451;3004;3004;8174;8174;8174;91978;997	-41473;-41473;-26794;-26794;19966;19966;19966;0;-14493
chr19	555876	556515	640	*	Distal Intergenic	19	544034	549920	5887	1	3004	uc031rit.1	11842	ENSG00000197540	GZMM	granzyme M	uc002low.2;uc031rit.1;uc002lpe.3;uc002loy.4;uc021ulx.2;uc002loz.4;uc002lpa.4;uc002lpc.3;uc002lou.3;uc002lov.3	3004;3004;610;682;682;682;682;682;91978;997	11842;11842;-33378;0;0;0;0;-22335;0;24143
chr19	574096	575946	1851	*	Promoter (1-2kb)	19	572454	583493	11040	1	682	uc002lpa.4	1642	ENSG00000172270	BSG	basigin (Ok blood group)	uc002low.2;uc031rit.1;uc002lpf.1;uc002lpe.3;uc002loy.4;uc021ulx.2;uc002loz.4;uc002lpa.4;uc002lpc.3;uc002lov.3	3004;3004;5442;610;682;682;682;682;682;997	30062;30062;57622;-13947;0;0;0;0;-2904;42363
chr19	791558	792372	815	*	Distal Intergenic	19	797392	812327	14936	1	5725	uc002lpp.2	-5020	ENSG00000011304	PTBP1	polypyrimidine tract binding protein 1	uc021uma.1;uc021uly.2;uc002lpo.3;uc002lpm.1;uc002lpn.1;uc010xfu.1;uc002lqa.1;uc002lpz.1;uc002lpp.2;uc002lpq.2;uc002lpr.2;uc002lpw.2;uc002lpx.2;uc002lpy.2	100422854;100616459;126353;5064;5064;5064;5657;566;5725;5725;5725;79948;79948;79948	-21212;-12568;40412;82605;82605;63772;-48613;-35459;-5020;-5020;-5020;29580;29580;29595
chr19	907015	907776	762	*	Intron (uc002lqg.2/91300, intron 1 of 7)	19	896503	913225	16723	2	91300	uc002lqg.2	5449	ENSG00000198858	R3HDM4	R3H domain containing 4	uc002lqd.1;uc010drw.2;uc002lqe.3;uc002lqf.3;uc010xfv.1;uc010xfw.1;uc010xfx.1;uc010xfy.1;uc010xga.1;uc002lqc.3;uc002lql.3;uc002lqk.4;uc002lqg.2	10025;10025;10025;10025;10025;10025;10025;10025;10025;1675;1820;84634;91300	-13797;-20814;-13797;-13797;-15867;-15866;-15866;-15866;-14393;47350;-18261;-9566;0
chr19	1203263	1203940	678	*	Promoter (1-2kb)	19	1205798	1228434	22637	1	6794	uc002lrl.1	-1858	ENSG00000118046	STK11	serine/threonine kinase 11	uc002lrk.4;uc010dse.3;uc002lrm.3;uc002lrn.3;uc002lro.3;uc002lrl.1;uc002lrp.3	22904;22904;255057;513;513;6794;90007	-28981;-28981;34050;-37809;-37809;-1858;0
chr19	1253276	1253873	598	*	Intron (uc002lrp.3/90007, intron 4 of 7)	19	1248552	1259142	10591	1	90007	uc002lrp.3	4724	ENSG00000167470	MIDN	midnolin	uc010dsg.1;uc002lrr.4;uc010xgl.1;uc010xgk.3;uc002lry.2;uc002lrm.3;uc002lrn.3;uc002lro.3;uc002lrw.4;uc002lrx.5;uc002lrl.1;uc002lrp.3	1153;1153;1153;148046;1943;255057;513;513;55009;55009;6794;90007	-15394;-15394;-15394;16386;-32280;-15286;11527;11527;-21647;-22147;47478;0
chr19	1632666	1633620	955	*	Promoter (<=1kb)	19	1609549	1632040	22492	2	6929	uc002lts.1	-626	ENSG00000071564	TCF3	transcription factor 3	uc002ltm.3;uc002ltj.3;uc002ltk.3;uc002ltl.1;uc002ltn.3;uc002lto.3;uc002ltq.3;uc002ltt.4;uc002ltr.3;uc002lts.1;uc010dso.1	10975;53615;53615;53615;6929;6929;6929;6929;6929;6929;6929	-27183;-40014;-39956;-40014;-16846;-10444;0;0;0;-626;-12814
chr19	1835914	1837991	2078	*	Intron (uc002lua.4/57455, intron 1 of 15)	19	1815245	1848452	33208	2	57455	uc002lua.4	10461	ENSG00000079313	REXO1	RNA exonuclease 1 homolog	uc002lub.1;uc021umm.1;uc002ltv.4;uc002ltw.4;uc002ltx.4;uc002lty.1;uc002ltz.2;uc010dsq.3;uc002lua.4;uc010xgs.1;uc010dsp.1;uc010dsr.1;uc002lud.3;uc002lue.3;uc002luf.3;uc002lug.3;uc002luc.3	100288123;100302210;148229;148229;148229;148229;148229;57455;57455;57455;57455;57455;81926;81926;81926;81926;83855	13826;-19677;-23678;-23639;-23639;-29755;-23639;-13871;0;-14233;-15858;0;43812;43812;47527;47527;0
chr19	1835914	1837991	2078	*	Intron (uc002lua.4/57455, intron 1 of 15)	19	1815245	1848452	33208	2	57455	uc002lua.4	10461	ENSG00000079313	REXO1	RNA exonuclease 1 homolog	uc002lub.1;uc021umm.1;uc002ltv.4;uc002ltw.4;uc002ltx.4;uc002lty.1;uc002ltz.2;uc010dsq.3;uc002lua.4;uc010xgs.1;uc010dsp.1;uc010dsr.1;uc002lud.3;uc002lue.3;uc002luf.3;uc002lug.3;uc002luc.3	100288123;100302210;148229;148229;148229;148229;148229;57455;57455;57455;57455;57455;81926;81926;81926;81926;83855	13826;-19677;-23678;-23639;-23639;-29755;-23639;-13871;0;-14233;-15858;0;43812;43812;47527;47527;0
chr19	1858612	1859358	747	*	Intron (uc002luc.3/83855, intron 1 of 1)	19	1852398	1863564	11167	2	83855	uc002luc.3	4206	ENSG00000129911	KLF16	KLF transcription factor 16	uc002lub.1;uc021umm.1;uc002lui.2;uc002luj.4;uc002luk.4;uc010dss.4;uc002luh.4;uc002ltv.4;uc002ltw.4;uc002ltx.4;uc002ltz.2;uc010dsq.3;uc002lua.4;uc010xgs.1;uc010dsp.1;uc010dsr.1;uc002lud.3;uc002lue.3;uc002luf.3;uc002lug.3;uc002luc.3	100288123;100302210;113178;113178;113178;113178;113179;148229;148229;148229;148229;57455;57455;57455;57455;57455;81926;81926;81926;81926;83855	36524;-42375;-46013;-46013;-46013;-46013;-46013;-46376;-46337;-46337;-46337;-36569;0;-36931;-38556;0;22445;22445;26160;26160;0
chr19	1872402	1872826	425	*	Distal Intergenic	19	1852398	1863564	11167	2	83855	uc002luc.3	-8838	ENSG00000129911	KLF16	KLF transcription factor 16	uc002lub.1;uc002lui.2;uc002luj.4;uc002luk.4;uc010dss.4;uc002luh.4;uc002lua.4;uc010dsr.1;uc002lud.3;uc002lue.3;uc002luf.3;uc002lug.3;uc002luc.3	100288123;113178;113178;113178;113178;113179;57455;57455;81926;81926;81926;81926;83855	50314;-32545;-32545;-32545;-32545;-32545;0;0;8977;8977;12692;12692;0
chr19	2263419	2264078	660	*	Distal Intergenic	19	2269520	2273487	3968	1	4946	uc002lvk.3	-5442	ENSG00000104904	OAZ1	ornithine decarboxylase antizyme 1	uc021umq.1;uc021umr.1;uc002lvj.2;uc002lvh.2;uc002lvn.2;uc002lvk.3;uc031rix.1;uc002lvf.1;uc010dsw.1;uc010dsx.1;uc002lvg.3;uc002lvb.4;uc002lvc.1;uc002lve.1	100302283;100423031;126306;268;374872;4946;55111;55111;56928;645191;8175;84444;84444;84444	-29271;12781;-6997;14306;18103;-5442;-26755;-26468;-5442;44078;26603;99271;52321;47254
chr19	2421693	2422435	743	*	Exon (uc010xgx.2/360200, exon 13 of 17)	19	2425622	2427875	2254	2	26517	uc002lvx.1	5440	ENSG00000099800	TIMM13	translocase of inner mitochondrial membrane 13	uc002lvx.1;uc002lvv.1;uc010xgx.2;uc002lvy.4	26517;360200;360200;84823	5440;31909;0;34531
chr19	3133084	3134046	963	*	Distal Intergenic	19	3136191	3150538	14348	1	2769	uc010xhf.1	-2145	ENSG00000060558	GNA15	G protein subunit alpha 15	uc002lxd.3;uc010xhf.1;uc002lxf.2;uc002lxg.3	2767;2769;2769;8698	38676;-2145;-2145;-44690
chr19	3183641	3184388	748	*	Promoter (1-2kb)	19	3185875	3209569	23695	1	56926	uc002lxh.1	-1487	ENSG00000125912	NCLN	nicalin	uc010xhf.1;uc002lxf.2;uc002lxh.1;uc002lxi.3;uc002lxj.1;uc002lxk.3;uc002lxl.2;uc002lxm.3;uc010dtj.2;uc010xhg.2;uc002lxg.3	2769;2769;56926;56926;56926;56926;60680;60680;60680;60680;8698	47450;47450;0;0;-14427;-20183;-40313;-40313;-40313;-41095;4905
chr19	3194034	3194873	840	*	Intron (uc002lxh.1/56926, intron 3 of 15)	19	3198815	3209569	10755	1	56926	uc002lxj.1	-3942	ENSG00000125912	NCLN	nicalin	uc010xhf.1;uc002lxf.2;uc002lxh.1;uc002lxi.3;uc002lxj.1;uc002lxk.3;uc002lxl.2;uc002lxm.3;uc010dtj.2;uc010xhg.2;uc002lxg.3	2769;2769;56926;56926;56926;56926;60680;60680;60680;60680;8698	57843;57843;0;0;-3942;-9698;-29828;-29828;-29828;-30610;15298
chr19	3374232	3375437	1206	*	Intron (uc002lxo.3/4782, intron 1 of 10)	19	3366565	3469215	102651	1	4782	uc010xhj.2	7667	ENSG00000141905	NFIC	nuclear factor I C	uc002lxo.3;uc010xhh.2;uc002lxp.3;uc010xhi.2;uc010xhj.2	4782;4782;4782;4782;4782	0;0;0;0;0
chr19	4130498	4131537	1040	*	Distal Intergenic	19	4090320	4124126	33807	2	5605	uc002lzk.3	-6372	ENSG00000126934	MAP2K2	mitogen-activated protein kinase kinase 2	uc002lzo.3;uc002lzp.3;uc002lzq.3;uc002lzr.3;uc010xid.2;uc002lzj.3;uc002lzk.3;uc002lzl.4;uc002lzm.4;uc010xib.3;uc010xic.3	51548;51548;51548;51548;51548;5605;5605;84699;84699;84699;84699	51059;51059;51059;51059;51059;-27296;-6372;-22061;-22061;-22061;-22061
chr19	4374564	4376452	1889	*	Intron (uc002maj.3/6455, intron 1 of 9)	19	4360364	4400565	40202	2	6455	uc002maj.3	24113	ENSG00000141985	SH3GL1	SH3 domain containing GRB2 like 1, endophilin A2	uc002mal.3;uc002mab.3;uc002mac.3;uc021unb.1;uc021unc.1;uc002mad.4;uc002maj.3;uc002mak.3;uc010xig.2;uc010dtx.2;uc002mae.3;uc002mag.3	10036;55620;55620;55620;55620;55620;6455;6455;6455;84954;84954;84954	-26208;-35623;-35623;-35623;-35623;-31781;0;0;0;31040;31040;31040
chr19	4556245	4556650	406	*	Intron (uc010dud.2/10501, intron 5 of 16)	19	4542600	4559771	17172	2	10501	uc010dud.2	3121	ENSG00000167680	SEMA6B	semaphorin 6B	uc010dud.2;uc010xih.1;uc002mau.3;uc002mas.3;uc002mat.1;uc010dub.1;uc002mar.1	10501;10501;116844;440503;440503;729359;729359	0;0;-16209;-21037;-16209;-44769;-38529
chr19	4638883	4639564	682	*	Promoter (<=1kb)	19	4639527	4655580	16054	1	126282	uc002max.3	0	ENSG00000185361	TNFAIP8L1	TNF alpha induced protein 8 like 1	uc021ung.1;uc002max.3;uc021une.1;uc002may.3;uc002mba.3	100131094;126282;126282;56005;91039	-39730;0;-465;30851;84291
chr19	5585748	5586416	669	*	Distal Intergenic	19	5558178	5568005	9828	2	257000	uc002mcc.5	-17743	ENSG00000223573	TINCR	TINCR ubiquitin domain containing	uc002mcc.5;uc010xiq.2;uc002mce.4;uc002mcf.3;uc002mcg.3;uc010xir.2;uc010xis.2;uc010xit.2;uc010xiu.2;uc002mcd.3;uc010xio.1;uc010xip.1	257000;6294;6294;6294;6294;6294;6294;6294;6294;9667;9667;9667	-17743;-36630;-36630;-36630;-36630;-36630;-36630;-36630;-36630;36522;36522;36522
chr19	5798730	5799952	1223	*	Distal Intergenic	19	5788035	5791249	3215	2	56931	uc010xiw.1	-7481	ENSG00000141994	DUS3L	dihydrouridine synthase 3 like	uc010xiv.1;uc002mdj.2;uc002mdk.2;uc002mdl.2;uc002mdm.2;uc002mdf.1;uc021unl.1;uc002mdg.1;uc002mdh.1;uc010duj.1;uc002mda.3;uc002mde.3;uc002mdc.3;uc002mdd.3;uc010xiw.1	163154;2525;2525;2525;2525;2528;2528;2528;2528;257062;257062;4902;56931;56931;56931	-13954;51533;51533;51533;51533;39076;39751;39790;39790;78042;78042;-23866;-7481;-7481;-7481
chr19	6576675	6577823	1149	*	Distal Intergenic	19	6583135	6591163	8029	2	970	uc010xjf.1	13340	ENSG00000125726	CD70	CD70 molecule	uc002mfh.2;uc010xjf.1;uc002mfi.3	8744;970;970	45665;13340;13340
chr19	7569519	7570007	489	*	Promoter (<=1kb)	19	7570403	7571586	1184	1	374877	uc010xjo.1	-396	ENSG00000198723	SAXO5	stabilizer of axonemal microtubules 5	uc010xjn.2;uc002mgq.2;uc010xjp.2;uc010xjq.2;uc002mgr.2;uc002mgs.3;uc002mgn.2;uc010xjm.1;uc002mgh.3;uc002mgi.3;uc002mgj.1;uc002mgm.2;uc010xjo.1;uc010dvh.2;uc002mgo.3;uc002mgp.3;uc002mgk.2;uc031rjc.1;uc002mgl.2	100128573;10908;10908;10908;10908;10908;140467;23370;23370;23370;23370;374877;374877;57192;57192;57192;92960;92960;92960	-31272;-29031;-29121;-29584;-29629;-30582;-10997;121799;109520;64945;57590;0;0;-17489;-17489;-17489;-15595;-15595;-15233
chr19	7570394	7571229	836	*	Promoter (<=1kb)	19	7570403	7571586	1184	1	374877	uc010xjo.1	0	ENSG00000198723	SAXO5	stabilizer of axonemal microtubules 5	uc010xjn.2;uc002mgq.2;uc010xjp.2;uc010xjq.2;uc002mgr.2;uc002mgs.3;uc002mgn.2;uc010xjm.1;uc002mgh.3;uc002mgi.3;uc002mgj.1;uc002mgm.2;uc010xjo.1;uc010dvh.2;uc002mgo.3;uc002mgp.3;uc002mgk.2;uc031rjc.1;uc002mgl.2	100128573;10908;10908;10908;10908;10908;140467;23370;23370;23370;23370;374877;374877;57192;57192;57192;92960;92960;92960	-32147;-27809;-27899;-28362;-28407;-29360;-9775;122674;110395;65820;58465;0;0;-16267;-16267;-16267;-16470;-16470;-16108
chr19	8482799	8483615	817	*	5' UTR	19	8478187	8503899	25713	1	51257	uc002mjx.3	4612	ENSG00000099785	MARCHF2	membrane associated ring-CH-type finger 2	uc002mjt.4;uc021uoc.2;uc010dwc.1;uc010xke.1;uc010dwd.3;uc010dwe.3;uc002mka.3;uc002mjq.1;uc002mjr.1;uc010xkc.1;uc002mjv.3;uc002mjw.3;uc002mjx.3;uc002mju.4	100507567;100847049;4670;4670;4670;4670;4670;51129;51129;51129;51257;51257;51257;9230	-27224;-28535;-26188;-26188;-26188;-26188;-44862;53788;53788;53759;0;0;0;27594
chr19	10397179	10398464	1286	*	Promoter (<=1kb)	19	10397643	10399260	1618	1	3386	uc002mnr.2	0	ENSG00000105371	ICAM4	intercellular adhesion molecule 4 (Landsteiner-Wiener blood group)	uc002mnw.4;uc002mnx.1;uc002mny.1;uc002mnz.3;uc002moa.3;uc002mnq.2;uc010xle.1;uc002mob.2;uc010dxd.1;uc010xlf.1;uc002mnr.2;uc002mns.2;uc002mnt.2;uc002mnm.3;uc002mnn.3;uc002mno.3;uc002mnu.4;uc002mnv.4	100125288;112812;112812;125950;125950;3383;3383;3385;3385;3385;3386;3386;3386;51073;51073;51073;7087;7087	21769;28227;28227;30584;45850;0;0;51881;51881;51881;0;0;0;34539;34539;34539;-2191;-3685
chr19	10409995	10410728	734	*	Distal Intergenic	19	10402149	10407454	5306	1	7087	uc002mnv.4	7846	ENSG00000105376	ICAM5	intercellular adhesion molecule 5	uc002mnw.4;uc002mnx.1;uc002mny.1;uc002mnz.3;uc002moa.3;uc002mnq.2;uc010xle.1;uc002mob.2;uc010dxd.1;uc010xlf.1;uc002mnr.2;uc002mns.2;uc002mnt.2;uc002mnm.3;uc002mnn.3;uc002mno.3;uc002mnu.4;uc002mnv.4	100125288;112812;112812;125950;125950;3383;3383;3385;3385;3385;3386;3386;3386;51073;51073;51073;7087;7087	9505;15963;15963;18320;33586;0;0;39617;39617;39617;0;0;0;47355;47355;47355;9340;7846
chr19	10653864	10654984	1121	*	Promoter (<=1kb)	19	10654593	10657829	3237	1	84971	uc010xlg.2	0	ENSG00000130734	ATG4D	autophagy related 4D cysteine peptidase	uc021uoy.1;uc002mpc.3;uc002mpd.3;uc002mpa.3;uc002mpb.3;uc002mot.2;uc002mou.2;uc002mow.1;uc002mox.1;uc002moy.1;uc010xlg.2;uc002mov.3;uc010dxh.3;uc010dxi.3;uc010xlh.2;uc010dxj.3;uc002moq.1;uc002mor.1	100302226;10053;10053;1032;1032;53637;53637;65095;65095;65095;84971;84971;84971;84971;84971;84971;9817;9817	-7814;43007;43007;24647;24671;-25738;-25196;16140;21712;21718;0;0;0;0;0;-649;-40383;-39810
chr19	10723102	10723770	669	*	Intron (uc002mpe.4/57153, intron 1 of 21)	19	10713121	10755235	42115	1	57153	uc002mpe.4	9981	ENSG00000129353	SLC44A2	solute carrier family 44 member 2 (CTL2 blood group)	uc002mpc.3;uc002mpd.3;uc002mpa.3;uc002mpb.3;uc002mpj.3;uc002mpk.2;uc002mpl.2;uc002mpm.2;uc010xli.1;uc002mpn.3;uc002mpo.3;uc002mpe.4;uc002mpf.3;uc002mpg.1;uc002mph.3;uc002mpi.3;uc002mox.1;uc002moy.1	10053;10053;1032;1032;147727;3609;3609;3609;3609;3609;3609;57153;57153;57153;57153;57153;65095;65095	-25111;-25111;-43471;-43447;40778;0;0;0;0;0;0;0;-12401;-21662;-22710;-24762;-46406;-46400
chr19	10727045	10728763	1719	*	Intron (uc002mpe.4/57153, intron 1 of 21)	19	10736171	10755235	19065	1	57153	uc002mpf.3	-7408	ENSG00000129353	SLC44A2	solute carrier family 44 member 2 (CTL2 blood group)	uc002mpc.3;uc002mpd.3;uc002mpa.3;uc002mpb.3;uc002mpj.3;uc002mpk.2;uc002mpl.2;uc002mpm.2;uc010xli.1;uc002mpn.3;uc002mpo.3;uc002mpe.4;uc002mpf.3;uc002mpg.1;uc002mph.3;uc002mpi.3	10053;10053;1032;1032;147727;3609;3609;3609;3609;3609;3609;57153;57153;57153;57153;57153	-29054;-29054;-47414;-47390;35785;0;0;0;0;0;0;0;-7408;-16669;-17717;-19769
chr19	10788139	10789055	917	*	Promoter (<=1kb)	19	10787839	10796441	8603	1	3609	uc002mpp.3	300	ENSG00000129351	ILF3	interleukin enhancer binding factor 3	uc002mpj.3;uc010dxk.2;uc002mps.2;uc002mpt.2;uc002mpu.2;uc002mpv.2;uc010dxl.2;uc002mpk.2;uc002mpl.2;uc002mpm.2;uc010xli.1;uc002mpn.3;uc002mpo.3;uc002mpp.3;uc002mpq.3;uc002mpe.4;uc002mpf.3;uc002mpg.1;uc002mph.3;uc002mpi.3;uc021uoz.1;uc002mpr.3	147727;1785;1785;1785;1785;1785;1785;3609;3609;3609;3609;3609;3609;3609;3609;57153;57153;57153;57153;57153;693223;81890	-23591;0;0;0;0;0;0;0;0;0;0;0;0;0;-7549;0;51968;42707;41659;39607;-40025;-23057
chr19	10829964	10830661	698	*	Promoter (<=1kb)	19	10829080	10829179	100	1	693223	uc021uoz.1	884	ENSG00000207972	MIR638	microRNA 638	uc010dxk.2;uc002mps.2;uc002mpt.2;uc002mpu.2;uc002mpv.2;uc010dxl.2;uc002mpk.2;uc002mpl.2;uc002mpm.2;uc010xli.1;uc002mpn.3;uc002mpo.3;uc002mpp.3;uc002mpq.3;uc021uoz.1;uc002mpr.3	1785;1785;1785;1785;1785;1785;3609;3609;3609;3609;3609;3609;3609;3609;693223;81890	0;0;0;0;0;0;0;0;0;0;0;0;0;33360;884;17852
chr19	10919465	10920821	1357	*	Promoter (<=1kb)	19	10919884	10942586	22703	1	1785	uc031rji.1	0	ENSG00000079805	DNM2	dynamin 2	uc021upa.1;uc002mpy.3;uc010dxk.2;uc002mps.2;uc002mpt.2;uc002mpu.2;uc002mpv.2;uc010dxl.2;uc002mpw.3;uc031rji.1;uc031rjj.1;uc002mpx.1;uc010dxm.1;uc010xlj.1	100616425;11018;1785;1785;1785;1785;1785;1785;1785;1785;1785;1785;255809;406976	28535;26162;0;0;0;0;0;0;0;0;0;-13079;-38285;7351
chr19	10922355	10923076	722	*	5' UTR	19	10919884	10942586	22703	1	1785	uc031rjj.1	2471	ENSG00000079805	DNM2	dynamin 2	uc021upa.1;uc002mpy.3;uc010dxk.2;uc002mps.2;uc002mpt.2;uc002mpu.2;uc002mpv.2;uc010dxl.2;uc002mpw.3;uc031rji.1;uc031rjj.1;uc002mpx.1;uc010dxm.1;uc010xlj.1	100616425;11018;1785;1785;1785;1785;1785;1785;1785;1785;1785;1785;255809;406976	31425;23907;0;0;0;0;0;0;0;0;0;-10824;-36030;5096
chr19	11009691	11010455	765	*	Intron (uc002mpz.3/10498, intron 1 of 15)	19	11022860	11033448	10589	1	10498	uc002mqa.3	-12405	ENSG00000142453	CARM1	coactivator associated arginine methyltransferase 1	uc002mpz.3;uc010dxn.3;uc002mqa.3;uc010dxm.1;uc002mqb.3;uc002mqc.3;uc002mqd.2	10498;10498;10498;255809;78992;78992;90580	0;0;-12405;50585;28807;28902;-28969
chr19	11253358	11254259	902	*	Distal Intergenic	19	11257831	11266484	8654	2	147841	uc002mql.2	12225	ENSG00000161888	SPC24	SPC24 component of NDC80 kinetochore complex	uc002mql.2;uc002mqm.3;uc021upe.1;uc002mqo.4;uc002mqp.1;uc002mqq.3;uc002mqk.4;uc010xlk.2;uc010xll.2;uc010xlm.2;uc010xln.2;uc010xlo.2;uc021upc.1;uc021upd.1;uc010dxu.3	147841;25959;25959;25959;25959;25959;3949;3949;3949;3949;3949;3949;3949;3949;3949	12225;0;0;0;0;54208;53320;53320;53320;53320;53320;53320;53320;52083;14674
chr19	11294702	11295489	788	*	Intron (uc002mqm.3/25959, intron 2 of 10)	19	11280352	11304718	24367	2	25959	uc002mqp.1	9229	ENSG00000197256	KANK2	KN motif and ankyrin repeat domains 2	uc002mql.2;uc002mqm.3;uc021upe.1;uc002mqo.4;uc002mqp.1;uc002mqq.3;uc002mqr.5;uc010xlq.3;uc002mqs.5	147841;25959;25959;25959;25959;25959;57572;57572;57572	-28218;0;0;0;0;12978;24290;53302;77679
chr19	11493527	11495487	1961	*	Promoter (<=1kb)	19	11487881	11495018	7138	2	2057	uc002mrj.2	0	ENSG00000187266	EPOR	erythropoietin receptor	uc002mrr.3;uc002mrs.3;uc010dxz.3;uc002mrg.1;uc010xlr.2;uc010xls.2;uc010xlt.2;uc010xlu.2;uc010xlv.2;uc010xlw.1;uc002mrj.2;uc002mrk.2;uc010xlx.2;uc010xly.2;uc002mqz.2;uc002mra.2;uc002mrb.2;uc002mrm.2;uc002mrn.2;uc002mro.2;uc002mrp.2;uc002mrq.2;uc002mre.2;uc002mrf.2;uc010dxy.3;uc002mqx.3	115948;115948;115948;126074;126075;126075;126075;126075;126075;126075;2057;2057;2057;2057;374882;374882;374882;57139;57139;57139;57139;57139;64748;64748;64748;9545	46554;50493;50493;8144;36346;36346;36346;36320;36320;34101;0;0;0;0;-36546;-36546;-36546;0;0;34531;34531;34531;27465;27465;23030;-43183
chr19	11607564	11608121	558	*	Intron (uc002mrz.2/115950, intron 2 of 8)	19	11594242	11616738	22497	2	115950	uc002mrz.2	8617	ENSG00000161914	ZNF653	zinc finger protein 653	uc002mrz.2;uc002msc.1;uc010xmb.1;uc010xmc.1;uc002mrx.1;uc002mry.1;uc010dyc.2;uc002msb.3;uc010dyd.3;uc010xma.2;uc002mrt.3;uc002mru.3;uc010xlz.2;uc002mrv.1;uc010dyb.3	115950;1264;1264;1264;1995;1995;51295;51295;51295;51295;5589;5589;5589;5589;5589	0;-41458;-41458;-41458;-15761;-15761;31559;31866;31866;31866;61295;61295;61295;61108;60998
chr19	11671033	11671864	832	*	Promoter (<=1kb)	19	11663858	11670051	6194	2	84337	uc002mse.1	-982	ENSG00000130165	ELOF1	elongation factor 1	uc002msc.1;uc010xmb.1;uc010xmc.1;uc002msk.2;uc010dyc.2;uc002msb.3;uc010dyd.3;uc010xma.2;uc002msg.4;uc002msh.4;uc002msi.4;uc002msj.4;uc010dye.1;uc002msd.1;uc002mse.1	1264;1264;1264;199692;51295;51295;51295;51295;54;54;54;54;54;84337;84337	21454;21454;21454;-36371;-31353;-31046;-31046;-31046;16689;17728;17937;17937;17937;-4751;-982
chr19	11674436	11674977	542	*	Exon (uc002msf.3/uc002msf.3, exon 3 of 5)	19	11663858	11670051	6194	2	84337	uc002mse.1	-4385	ENSG00000130165	ELOF1	elongation factor 1	uc002msc.1;uc010xmb.1;uc010xmc.1;uc002msk.2;uc010dyc.2;uc002msb.3;uc010dyd.3;uc010xma.2;uc002msg.4;uc002msh.4;uc002msi.4;uc002msj.4;uc010dye.1;uc002msd.1;uc002mse.1	1264;1264;1264;199692;51295;51295;51295;51295;54;54;54;54;54;84337;84337	24857;24857;24857;-33258;-34756;-34449;-34449;-34449;13576;14615;14824;14824;14824;-8154;-4385
chr19	12847521	12848369	849	*	Promoter (<=1kb)	19	12848306	12859137	10832	1	439	uc002muv.3	0	ENSG00000198356	GET3	guided entry of tail-anchored proteins factor 3, ATPase	uc002mut.1;uc002muy.2;uc002muz.2;uc002mup.3;uc002muq.3;uc002muo.3;uc002mur.3;uc002muv.3;uc002mux.3;uc002muu.3;uc010xmp.2;uc002mum.1;uc010dyx.2	26810;29911;29911;30000;30000;30000;30000;439;54831;79002;84261;84261;84261	-30189;38065;38065;-14992;-14416;-14059;-12711;0;-15038;-1992;-40066;-40066;-40126
chr19	12847521	12848369	849	*	Promoter (<=1kb)	19	12848306	12859137	10832	1	439	uc002muv.3	0	ENSG00000198356	GET3	guided entry of tail-anchored proteins factor 3, ATPase	uc002mut.1;uc002muy.2;uc002muz.2;uc002mup.3;uc002muq.3;uc002muo.3;uc002mur.3;uc002muv.3;uc002mux.3;uc002muu.3;uc010xmp.2;uc002mum.1;uc010dyx.2	26810;29911;29911;30000;30000;30000;30000;439;54831;79002;84261;84261;84261	-30189;38065;38065;-14992;-14416;-14059;-12711;0;-15038;-1992;-40066;-40066;-40126
chr19	12895038	12896674	1637	*	Distal Intergenic	19	12902310	12904125	1816	1	3726	uc002mvc.3	-5636	ENSG00000171223	JUNB	JunB proto-oncogene, AP-1 transcription factor subunit	uc002mvg.1;uc002muy.2;uc002muz.2;uc002mvc.3;uc002muv.3;uc002mux.3;uc002mvd.4;uc002muu.3;uc002mvi.4;uc031rjl.1;uc031rjm.1;uc031rjn.1;uc021upo.2;uc031rjo.1;uc002mvh.2;uc002mvj.4	10535;29911;29911;3726;439;54831;7001;79002;83546;83546;83546;83546;83546;83546;83546;83546	-20754;-8604;-8604;-5636;0;31631;0;-49509;44556;44815;44815;44815;48716;48716;49568;49568
chr19	12900488	12900978	491	*	Promoter (1-2kb)	19	12902310	12904125	1816	1	3726	uc002mvc.3	-1332	ENSG00000171223	JUNB	JunB proto-oncogene, AP-1 transcription factor subunit	uc002mvg.1;uc002mvm.3;uc002muy.2;uc002muz.2;uc002mvc.3;uc002muv.3;uc002mux.3;uc002mvd.4;uc002mvi.4;uc031rjl.1;uc031rjm.1;uc031rjn.1;uc021upo.2;uc031rjo.1;uc002mvh.2;uc002mvj.4	10535;22983;29911;29911;3726;439;54831;7001;83546;83546;83546;83546;83546;83546;83546;83546	-16450;-48281;-14054;-14054;-1332;0;37081;0;40252;40511;40511;40511;44412;44412;45264;45264
chr19	12910576	12911520	945	*	Promoter (1-2kb)	19	12907634	12912724	5091	2	7001	uc002mvd.4	1204	ENSG00000167815	PRDX2	peroxiredoxin 2	uc002mvg.1;uc002mvm.3;uc021upp.1;uc002muy.2;uc002muz.2;uc002mvc.3;uc002mux.3;uc002mvd.4;uc002mvi.4;uc031rjl.1;uc031rjm.1;uc031rjn.1;uc021upo.2;uc031rjo.1;uc002mvh.2;uc002mvj.4	10535;22983;22983;29911;29911;3726;54831;7001;83546;83546;83546;83546;83546;83546;83546;83546	-5908;-37739;-39740;-24142;-24142;8266;47169;0;29710;29969;29969;29969;33870;33870;34722;34722
chr19	12996466	12999050	2585	*	Promoter (<=1kb)	19	12995237	12998017	2781	2	10661	uc002mvo.3	0	ENSG00000105610	KLF1	KLF transcription factor 1	uc002mvo.3;uc002mvn.1;uc010xmr.1;uc002mvs.2;uc010xmv.1;uc002mvm.3;uc021upp.1;uc002mvr.2;uc010xms.3;uc002mvp.4;uc002mvq.4;uc010xmt.3;uc010xmu.3	10661;1777;1777;2193;2193;22983;22983;256126;2639;2639;2639;2639;2639	0;-4131;-4131;45508;45508;47207;45206;31036;-2893;-2893;-2893;-2893;-2893
chr19	13048114	13049311	1198	*	Promoter (<=1kb)	19	13049414	13055304	5891	1	811	uc002mvu.2	-103	ENSG00000179218	CALR	calreticulin	uc010dyz.1;uc002mwc.1;uc002mvs.2;uc010xmv.1;uc002mvr.2;uc010xms.3;uc002mvp.4;uc002mvq.4;uc010xmt.3;uc010xmu.3;uc002mvw.2;uc002mvz.2;uc010xmw.2;uc031rjp.1;uc002mvu.2;uc002mwb.4	199699;199699;2193;2193;256126;2639;2639;2639;2639;2639;5886;5886;5886;5886;811;90480	-26662;-31013;-3556;-3556;-18028;46171;46171;46171;46171;46171;0;0;0;0;-103;18757
chr19	13056118	13057012	895	*	Promoter (<=1kb)	19	13056628	13064457	7830	1	5886	uc002mvw.2	0	ENSG00000179262	RAD23A	RAD23 homolog A, nucleotide excision repair protein	uc010dyz.1;uc002mwc.1;uc002mvs.2;uc010xmv.1;uc002mvr.2;uc010xms.3;uc002mvp.4;uc002mvq.4;uc010xmt.3;uc010xmu.3;uc002mwd.3;uc002mvw.2;uc002mvz.2;uc010xmw.2;uc031rjp.1;uc002mvu.2;uc002mwb.4	199699;199699;2193;2193;256126;2639;2639;2639;2639;2639;4784;5886;5886;5886;5886;811;90480	-18961;-23312;-11560;-11560;-26032;54175;54175;54175;54175;54175;0;0;0;0;0;6704;11056
chr19	13058438	13059575	1138	*	Promoter (1-2kb)	19	13056628	13064457	7830	1	5886	uc031rjp.1	1810	ENSG00000179262	RAD23A	RAD23 homolog A, nucleotide excision repair protein	uc010dyz.1;uc002mwc.1;uc002mvs.2;uc010xmv.1;uc002mvr.2;uc002mvp.4;uc002mvq.4;uc010xmt.3;uc010xmu.3;uc002mwd.3;uc002mvw.2;uc002mvz.2;uc010xmw.2;uc031rjp.1;uc002mvu.2;uc002mwb.4	199699;199699;2193;2193;256126;2639;2639;2639;2639;4784;5886;5886;5886;5886;811;90480	-16398;-20749;-13880;-13880;-28352;56495;56495;56495;56495;0;0;0;0;0;9024;8493
chr19	13180079	13181301	1223	*	Intron (uc002mwd.3/4784, intron 2 of 9)	19	13209842	13213974	4133	2	4066	uc002mwi.3	32673	ENSG00000104903	LYL1	LYL1 basic helix-loop-helix family member	uc002mwm.4;uc002mwi.3;uc002mwd.3;uc002mwe.4;uc002mwf.3;uc010xmx.2;uc002mwg.2;uc010xmy.1;uc002mwj.2;uc002mwk.2;uc002mwl.3;uc010xmz.1	112939;4066;4784;4784;4784;4784;4784;55621;55621;55621;55621;55621	-47801;0;0;0;0;0;0;39204;46162;46162;46262;46262
chr19	13189890	13190633	744	*	Intron (uc002mwd.3/4784, intron 7 of 9)	19	13209842	13213974	4133	2	4066	uc002mwi.3	23341	ENSG00000104903	LYL1	LYL1 basic helix-loop-helix family member	uc002mwm.4;uc002mwi.3;uc002mwd.3;uc002mwe.4;uc002mwf.3;uc010xmx.2;uc002mwg.2;uc010xmy.1;uc002mwj.2;uc002mwk.2;uc002mwl.3;uc010xmz.1	112939;4066;4784;4784;4784;4784;4784;55621;55621;55621;55621;55621	-38469;0;0;0;0;0;0;29872;36830;36830;36930;36930
chr19	13212976	13214293	1318	*	Promoter (<=1kb)	19	13209842	13213974	4133	2	4066	uc002mwi.3	0	ENSG00000104903	LYL1	LYL1 basic helix-loop-helix family member	uc002mwm.4;uc002mwi.3;uc002mwd.3;uc002mwe.4;uc002mwf.3;uc010xmx.2;uc002mwg.2;uc010xmy.1;uc002mwj.2;uc002mwk.2;uc002mwl.3;uc010xmz.1;uc002mwn.4;uc002mwo.4;uc021upq.2;uc031rjq.1;uc002mwr.3	112939;4066;4784;4784;4784;4784;4784;55621;55621;55621;55621;55621;8677;8677;8677;8677;9592	-14809;0;0;0;0;0;0;6212;13170;13170;13270;13270;46895;46895;46895;46895;-46989
chr19	14007955	14008652	698	*	Intron (uc002mxl.1/79173, intron 2 of 7)	19	13993168	14003703	10536	2	79173	uc002mxk.1	-4252	ENSG00000132016	BRME1	break repair meiotic recombinase recruitment factor 1	uc002mxj.4;uc010xnh.2;uc002mxn.2;uc002mxo.2;uc002mxp.2;uc010dzh.2;uc002mxq.1;uc010dzg.2;uc002mxk.1;uc002mxl.1;uc010xni.2;uc002mxr.3;uc002mxs.3;uc010xnj.2	342977;406957;54862;54862;54862;54862;54862;574457;79173;79173;79883;79883;79883;79883	19892;22442;-8304;-8304;-8304;-15329;-20665;22266;-4252;0;40226;40637;55552;55552
chr19	14068756	14069360	605	*	Promoter (1-2kb)	19	14070561	14072256	1696	1	90379	uc002mxu.3	-1201	ENSG00000132017	DCAF15	DDB1 and CUL4 associated factor 15	uc002mxn.2;uc002mxo.2;uc002mxp.2;uc010dzh.2;uc002mxq.1;uc002mxv.3;uc010dzi.2;uc010xni.2;uc002mxr.3;uc002mxs.3;uc010xnj.2;uc002mxt.3;uc002mxu.3	54862;54862;54862;54862;54862;5989;5989;79883;79883;79883;79883;90379;90379	51800;51800;51800;44775;39439;0;0;-19878;-19467;-4552;-4552;0;-1201
chr19	14117118	14118354	1237	*	Promoter (<=1kb)	19	14072342	14117134	44793	2	5989	uc002mxv.3	0	ENSG00000132005	RFX1	regulatory factor X1	uc002mxw.1;uc010dzj.1;uc010xnk.1;uc002mxv.3;uc010dzi.2;uc002mxt.3;uc002mxu.3;uc002mxx.4	117579;117579;342979;5989;5989;90379;90379;9466	-20663;-20663;51617;0;0;0;46557;-24198
chr19	14253022	14254379	1358	*	Intron (uc002myf.3/100507373, intron 1 of 2)	19	14247964	14282075	34112	1	100507373	uc002myf.3	5058	ENSG00000267169	ADGRL1-AS1	ADGRL1 antisense RNA 1	uc002myf.3;uc010xnn.2;uc010xno.2;uc002myb.3;uc002myc.3;uc010xnm.1;uc002myd.3;uc002mye.3	100507373;22859;22859;5566;5566;5566;5566;55723	0;62618;62618;-28030;-24463;-29563;-34801;-5582
chr19	14466592	14467432	841	*	Distal Intergenic	19	14491956	14519537	27582	1	976	uc002myl.3	-24524	ENSG00000123146	ADGRE5	adhesion G protein-coupled receptor E5	uc002myl.3;uc002mym.3;uc002myn.3	976;976;976	-24524;-24524;-24524
chr19	14647968	14648625	658	*	Intron (uc002mza.3/9524, intron 1 of 12)	19	14640379	14676792	36414	1	9524	uc010xns.2	7589	ENSG00000099797	TECR	trans-2,3-enoyl-CoA reductase	uc002myt.4;uc002myu.4;uc002myw.4;uc002myx.4;uc002myy.4;uc002myz.1;uc010xnr.1;uc010dzn.2;uc010dzo.2;uc010xnt.2;uc010xnu.2;uc002mzg.3;uc021upw.1;uc002mza.3;uc002mzb.3;uc002mzc.3;uc010xns.2;uc002mze.3	10755;10755;10755;10755;10755;3337;3337;388512;388512;388512;388512;4713;693224;9524;9524;9524;9524;9524	-41007;-41007;-41007;-41007;-41007;-18767;-7919;-45271;-45271;-45271;-45271;34264;7613;0;0;0;0;-26966
chr19	14893798	14895095	1298	*	Distal Intergenic	19	14843509	14889353	45845	2	30817	uc002mzp.2	-4445	ENSG00000127507	ADGRE2	adhesion G protein-coupled receptor E2	uc002mzw.3;uc010xnz.2;uc010dzs.2;uc031rjs.1;uc010xnw.2;uc031rjt.1;uc002mzp.2;uc031rju.1;uc010xnx.2;uc010xny.1	26659;26664;30817;30817;30817;30817;30817;30817;30817;30817	44181;15853;-17416;-16605;-6059;-6028;-4445;-6059;-10489;-6059
chr19	14893798	14895095	1298	*	Distal Intergenic	19	14843509	14889353	45845	2	30817	uc002mzp.2	-4445	ENSG00000127507	ADGRE2	adhesion G protein-coupled receptor E2	uc002mzw.3;uc010xnz.2;uc010dzs.2;uc031rjs.1;uc010xnw.2;uc031rjt.1;uc002mzp.2;uc031rju.1;uc010xnx.2;uc010xny.1	26659;26664;30817;30817;30817;30817;30817;30817;30817;30817	44181;15853;-17416;-16605;-6059;-6028;-4445;-6059;-10489;-6059
chr19	14941268	14942151	884	*	Promoter (1-2kb)	19	14937139	14939276	2138	2	26659	uc002mzw.3	-1992	ENSG00000188269	OR7A5	olfactory receptor family 7 subfamily A member 5	uc010xob.2;uc002mzw.3;uc010xnz.2;uc002mzx.1	26333;26659;26664;390892	50016;-1992;-30320;10538
chr19	15403760	15404576	817	*	Intron (uc002nat.3/23476, intron 1 of 11)	19	15357847	15391262	33416	2	23476	uc002nas.3	-12498	ENSG00000141867	BRD4	bromodomain containing 4	uc002nar.3;uc002nas.3;uc002nat.3;uc002nau.4	23476;23476;23476;23476	-12498;-12498;0;0
chr19	15513238	15513790	553	*	Promoter (<=1kb)	19	15511219	15512414	1196	2	26993	uc002naz.3	-824	ENSG00000011243	AKAP8L	A-kinase anchoring protein 8 like	uc021upx.1;uc010dzy.3;uc002nav.3;uc010dzz.1;uc010xog.2;uc002naw.1;uc002nax.1;uc010xoh.1;uc002nay.1;uc002naz.3;uc002nbc.3;uc002nba.4;uc002nbb.4;uc002nbd.3;uc002nbe.2	100302127;10270;10270;10270;10270;26993;26993;26993;26993;26993;58525;58525;58525;64926;64926	-46569;-29087;-22626;-28362;-22626;0;0;0;0;-824;28203;29552;46972;51583;61592
chr19	15938867	15940293	1427	*	Promoter (<=1kb)	19	15939757	15947131	7375	1	652995	uc002nbr.4	0	ENSG00000214049	UCA1	urothelial cancer associated 1	uc002nbq.2;uc010xos.2;uc002nbo.3;uc002nbr.4;uc002nbs.1;uc010xot.1	26539;284433;388514;652995;8529;8529	-19931;34008;-48069;0;68591;68591
chr19	16186572	16187041	470	*	Promoter (<=1kb)	19	16187135	16213813	26679	1	7171	uc002ndj.2	-94	ENSG00000167460	TPM4	tropomyosin 4	uc002nbw.2;uc002nca.3;uc010xow.2;uc002ncb.1;uc002ncc.3;uc010eac.3;uc002nce.3;uc002ndm.1;uc002ndn.4;uc010xpc.2;uc002ndi.2;uc002ndj.2;uc002ndk.1	126536;126536;126536;126536;148231;148231;148231;4218;4218;4218;7171;7171;7171	60128;53874;53874;53134;42554;42049;41642;-35449;-35449;-35449;0;-94;-4782
chr19	16319670	16320677	1008	*	Exon (uc002ndu.2/8907, exon 5 of 12)	19	16308665	16346156	37492	1	8907	uc010xpd.1	11005	ENSG00000072958	AP1M1	adaptor related protein complex 1 subunit mu 1	uc002nds.3;uc010eae.3;uc010eaf.3;uc010eag.3;uc002ndt.3;uc002ndu.2;uc002ndv.2;uc010xpd.1	117286;117286;117286;117286;26017;8907;8907;8907	-35384;-35384;-35384;-35384;23435;0;0;0
chr19	16557647	16558196	550	*	Intron (uc002ndx.4/58513, intron 1 of 23)	19	16472389	16547824	75436	2	58513	uc010xpe.2	-9823	ENSG00000127527	EPS15L1	epidermal growth factor receptor pathway substrate 15 like 1	uc002ned.3;uc002ndx.4;uc002ndy.4;uc010xpe.2;uc002ndz.2;uc002nea.2;uc010xpf.2;uc010eah.2;uc002neb.1;uc002nec.2;uc002nef.1;uc002neg.3;uc002neh.1;uc010eai.1;uc002nee.3	125972;58513;58513;58513;58513;58513;58513;58513;58513;58513;84167;84167;84167;84167;9441	48807;0;0;-9823;0;0;0;0;-11540;0;-49009;-49009;-49009;-49009;180819
chr19	17001267	17001997	731	*	Promoter (1-2kb)	19	16999826	17002830	3005	1	9002	uc002nfa.3	1441	ENSG00000127533	F2RL3	F2R like thrombin or trypsin receptor 3	uc002new.3;uc002ney.2;uc002nez.2;uc010xpi.1;uc010eaj.1;uc002nfb.3;uc002nfd.1;uc002nfa.3	23309;23309;23309;23309;23309;27151;27151;9002	61058;61058;61058;27121;13294;135628;12436;0
chr19	17392038	17392989	952	*	Promoter (<=1kb)	19	17392454	17398454	6001	1	126549	uc002nga.2	0	ENSG00000160117	ANKLE1	ankyrin repeat and LEM domain containing 1	uc002nga.2;uc010eao.1;uc010xpm.1;uc010xpn.1;uc002nfy.2;uc002nfz.2;uc002nfq.3;uc010xpl.1;uc002nfu.3;uc002nfv.3;uc010ean.2;uc002nfw.3;uc002ngf.2;uc010eap.2;uc002ngc.1;uc002ngd.3;uc002ngb.4;uc002nfr.1;uc002nfs.1;uc002nft.1;uc010xpk.1;uc010eam.1	126549;126549;126549;126549;126549;126549;2063;29086;29086;29086;29086;29086;57719;57719;64981;79016;79575;83878;83878;83878;83878;83878	0;0;0;0;0;0;-35887;13806;13806;13806;0;13771;52649;52649;-23488;-27348;21293;-22757;-16494;-16494;-16494;-16494
chr19	17509738	17510325	588	*	Distal Intergenic	19	17513755	17516384	2630	2	684	uc002ngl.3	6059	ENSG00000130303	BST2	bone marrow stromal cell antigen 2	uc021uqh.1;uc002ngr.3;uc002ngl.3;uc002ngk.1;uc002ngn.1;uc002ngo.1	100130519;100130519;684;83483;93343;93343	49051;49051;6059;-21601;-20587;-20587
chr19	18053522	18054424	903	*	Exon (uc010xpz.2/115098, exon 3 of 5)	19	18045905	18054794	8890	1	115098	uc002nhs.3	7617	ENSG00000007080	CCDC124	coiled-coil domain containing 124	uc010xpz.2;uc002nhs.3;uc002nht.3;uc010xqa.1;uc002nhr.4	115098;115098;3780;3780;6528	0;0;-7687;-8670;70740
chr19	18110056	18111221	1166	*	Promoter (<=1kb)	19	18111944	18124911	12968	1	27106	uc002nhu.3	-723	ENSG00000105643	ARRDC2	arrestin domain containing 2	uc002nhu.3;uc002nhv.3;uc002nht.3;uc010xqa.1	27106;27106;3780;3780	-723;-7756;47945;46962
chr19	18201834	18202367	534	*	Intron (uc002nhx.1/3594, intron 1 of 17)	19	18181372	18197742	16371	2	3594	uc002nhy.3	-4092	ENSG00000096996	IL12RB1	interleukin 12 receptor subunit beta 1	uc002nhz.4;uc002nhw.1;uc010xqb.1;uc002nhx.1;uc002nhy.3	23031;3594;3594;3594;3594	-6236;-4092;-4092;0;-4092
chr19	18267750	18268366	617	*	Intron (uc002nia.2/5296, intron 2 of 15)	19	18263988	18288927	24940	1	5296	uc002nib.2	3762	ENSG00000105647	PIK3R2	phosphoinositide-3-kinase regulatory subunit 2	uc002nic.1;uc002nhz.4;uc002nia.2;uc010ebi.2;uc002nib.2;uc002nie.2;uc002nid.3;uc010ebj.3	10437;23031;5296;5296;5296;5864;84769;84769	-16213;59147;0;0;0;46508;-35674;-35694
chr19	18271359	18272251	893	*	Exon (uc002nia.2/5296, exon 3 of 16)	19	18263988	18288927	24940	1	5296	uc002nib.2	7371	ENSG00000105647	PIK3R2	phosphoinositide-3-kinase regulatory subunit 2	uc002nic.1;uc002nhz.4;uc002nig.4;uc002nih.4;uc010ebk.3;uc002nif.4;uc002nii.4;uc010ebl.3;uc010xqc.2;uc002nik.4;uc002nil.4;uc002nia.2;uc010ebi.2;uc002nib.2;uc002nie.2;uc002nid.3;uc010ebj.3	10437;23031;5143;5143;5143;5143;5143;5143;5143;5143;5143;5296;5296;5296;5864;84769;84769	-12328;62756;59737;59791;63052;65034;65034;71959;72230;86759;93978;0;0;0;42623;-31789;-31809
chr19	18403698	18404415	718	*	Distal Intergenic	19	18392887	18392971	85	1	100422833	uc021uqm.1	10811	ENSG00000267959	MIR3188	microRNA 3188	uc021uqm.1;uc002niq.3;uc021uqn.1;uc002nip.2;uc002nik.4;uc002nil.4;uc002nir.1;uc002nis.1;uc002nit.1;uc010xqg.1;uc021uql.1;uc002nin.2;uc010ebn.2;uc010xqe.1	100422833;25804;25804;3727;5143;5143;54858;54858;54858;54858;729966;80726;80726;80726	10811;29586;29586;-11266;-44688;-37469;-46993;-46993;-46993;-46993;-37469;-18379;-18379;-18379
chr19	18484382	18485473	1092	*	Distal Intergenic	19	18496968	18499986	3019	1	9518	uc002niv.2	-11495	ENSG00000130513	GDF15	growth differentiation factor 15	uc021uqo.1;uc002niw.3;uc002nix.3;uc010ebp.3;uc002niy.3;uc002niz.3;uc002nir.1;uc002nis.1;uc002nit.1;uc010xqg.1;uc002niv.2	100422943;126364;126364;170463;170463;170463;54858;54858;54858;54858;9518	-11899;22942;22948;-44673;-44673;-44673;32974;32974;32974;32974;-11495
chr19	18549320	18550409	1090	*	Promoter (<=1kb)	19	18545198	18549111	3914	2	51477	uc010xqh.2	-209	ENSG00000105655	ISYNA1	inositol-3-phosphate synthase 1	uc002niw.3;uc002nix.3;uc010ebp.3;uc002niy.3;uc002niz.3;uc002nja.2;uc002njb.2;uc002njc.2;uc002njd.2;uc002nje.2;uc010xqh.2;uc002njg.3;uc002njh.3;uc010ebq.3;uc002niv.2	126364;126364;170463;170463;170463;51477;51477;51477;51477;51477;51477;8178;8178;8178;9518	-40905;-40899;19174;19174;19174;-1201;-750;-348;-209;-209;-209;36336;0;0;52352
chr19	18552489	18552871	383	*	Distal Intergenic	19	18545198	18549111	3914	2	51477	uc010xqh.2	-3378	ENSG00000105655	ISYNA1	inositol-3-phosphate synthase 1	uc002niw.3;uc002nix.3;uc010ebp.3;uc002niy.3;uc002niz.3;uc002nja.2;uc002njb.2;uc002njc.2;uc002njd.2;uc002nje.2;uc010xqh.2;uc002njg.3;uc002njh.3;uc010ebq.3	126364;126364;170463;170463;170463;51477;51477;51477;51477;51477;51477;8178;8178;8178	-44074;-44068;22343;22343;22343;-4370;-3919;-3517;-3378;-3378;-3378;33874;0;0
chr19	18617575	18618910	1336	*	Intron (uc002njh.3/8178, intron 1 of 11)	19	18553473	18632937	79465	2	8178	uc002njh.3	14027	ENSG00000105656	ELL	elongation factor for RNA polymerase II	uc010xqi.1;uc002njj.1;uc002njk.1;uc021uqp.1;uc002njo.3;uc021uqq.1;uc021uqr.1;uc002njg.3;uc002njh.3;uc010ebq.3	23770;23770;23770;23770;79036;79036;79036;8178;8178;8178	34872;35473;35473;35473;-49662;-49662;-49662;-30830;0;0
chr19	18654499	18655467	969	*	Promoter (<=1kb)	19	18642568	18654383	11816	2	23770	uc021uqp.1	-116	ENSG00000105701	FKBP8	FKBP prolyl isomerase 8	uc010xqi.1;uc002njj.1;uc002njk.1;uc021uqp.1;uc002nju.2;uc002njv.4;uc010ebs.3;uc002njr.3;uc002njs.3;uc002njo.3;uc021uqq.1;uc021uqr.1;uc002njq.3;uc002njh.3;uc010ebq.3;uc010ebt.2	23770;23770;23770;23770;55049;55049;55049;7311;7311;79036;79036;79036;79036;8178;8178;9244	-717;-116;-116;-116;-44028;-44028;-44028;-27147;-27147;-13105;-13105;-13105;-16865;0;0;62193
chr19	19170685	19171449	765	*	Distal Intergenic	19	19174803	19223841	49039	1	284439	uc002nlf.3	-3354	ENSG00000181035	SLC25A42	solute carrier family 25 member 42	uc002nkx.2;uc002nkz.1;uc002nla.1;uc002nlb.2;uc010xqk.1;uc002nlf.3;uc010xqn.1;uc002nlc.3;uc002nld.3;uc010xql.2;uc010xqm.2	10147;10147;10147;10147;10147;284439;284439;93436;93436;93436;93436	-26305;-26337;-25853;-26305;-28794;-3354;-35303;26298;26298;26298;25764
chr19	21785357	21786501	1145	*	Distal Intergenic	19	21688437	21739070	50634	1	353088	uc010ecu.2	96920	ENSG00000197013	ZNF429	zinc finger protein 429	uc010ecu.2	353088	96920
chr19	21809811	21810830	1020	*	Distal Intergenic	19	21688437	21739070	50634	1	353088	uc010ecu.2	121374	ENSG00000197013	ZNF429	zinc finger protein 429	NA	NA	NA
chr19	29097197	29097805	609	*	Intron (uc002nsa.2/uc002nsa.2, intron 5 of 9)	19	29456038	29460055	4018	1	148145	uc002nsb.4	-358233	ENSG00000267339	LINC00906	long intergenic non-protein coding RNA 906	NA	NA	NA
chr19	33119086	33120023	938	*	Exon (uc002ntn.1/84079, exon 14 of 29)	19	33087907	33166102	78196	2	84079	uc002ntn.1	46079	ENSG00000105186	ANKRD27	ankyrin repeat domain 27	uc002ntp.1;uc002ntn.1;uc002nto.1;uc002ntl.3;uc002ntm.3;uc010ede.3	388531;84079;84079;9141;9141;9141	-46290;0;0;46992;46992;46992
chr19	33162593	33163218	626	*	Intron (uc002ntn.1/84079, intron 1 of 28)	19	33087907	33166102	78196	2	84079	uc002ntn.1	2884	ENSG00000105186	ANKRD27	ankyrin repeat domain 27	uc002ntp.1;uc010edf.3;uc002ntn.1;uc002nto.1;uc002ntr.4;uc002ntq.2	388531;390916;84079;84079;91646;91646	-3095;-19649;0;0;-47461;-47461
chr19	36294274	36295089	816	*	Intron (uc002obx.1/58510, intron 8 of 10)	19	36290892	36304201	13310	2	58510	uc002obx.1	9112	ENSG00000250799	PRODH2	proline dehydrogenase 2	uc002obr.2;uc002obs.2;uc002obt.2;uc010eek.2;uc002obv.1;uc002obn.2;uc002obo.1;uc002obp.3;uc021usz.1;uc002oby.3;uc010eem.1;uc021usw.1;uc021usx.1;uc002obx.1	115703;115703;115703;115703;115703;126393;148137;148137;148137;4868;4868;55957;55957;58510	27857;27857;27857;25787;20775;-46344;45230;45230;45230;47806;35231;55012;50459;0
chr19	36591183	36591815	633	*	Exon (uc002odc.2/284403, exon 23 of 32)	19	36602105	36604613	2509	1	728361	uc031rkj.1	-10290	ENSG00000105261	OVOL3	ovo like zinc finger 3	uc002odg.1;uc010xtb.1;uc002oda.1;uc010xtc.1;uc031rki.1;uc010eer.3;uc002odb.2;uc002odc.2;uc002odd.2;uc002ode.3;uc002odf.3;uc031rkj.1;uc002odi.1;uc002odj.3;uc002odk.3;uc002odl.3	1155;199745;199745;199745;199745;284403;284403;284403;284403;5438;5438;728361;826;826;826;826	-14073;-46011;-45519;-45519;-45519;45400;45400;0;0;14391;14391;-10290;-39103;-39103;-39103;-39214
chr19	36594875	36595591	717	*	Exon (uc002odc.2/284403, exon 30 of 32)	19	36602105	36604613	2509	1	728361	uc031rkj.1	-6514	ENSG00000105261	OVOL3	ovo like zinc finger 3	uc002odg.1;uc002odm.1;uc010xtb.1;uc002oda.1;uc010xtc.1;uc031rki.1;uc010eer.3;uc002odb.2;uc002odc.2;uc002odd.2;uc002ode.3;uc002odf.3;uc031rkj.1;uc002odi.1;uc002odj.3;uc002odk.3;uc002odl.3	1155;1346;199745;199745;199745;199745;284403;284403;284403;284403;5438;5438;728361;826;826;826;826	-10297;48180;-49703;-49211;-49211;-49211;49092;49092;0;0;10615;10615;-6514;-35327;-35327;-35327;-35438
chr19	38611103	38611895	793	*	Intron (uc002ohk.3/23094, intron 9 of 21)	19	38701649	38714890	13242	2	8193	uc002ohl.3	102995	ENSG00000011332	DPF1	double PHD fingers 1	uc002ohk.3	23094	0
chr19	38613119	38613916	798	*	Intron (uc002ohk.3/23094, intron 9 of 21)	19	38701649	38714890	13242	2	8193	uc002ohl.3	100974	ENSG00000011332	DPF1	double PHD fingers 1	uc002ohk.3	23094	0
chr19	38643147	38644224	1078	*	Exon (uc002ohk.3/23094, exon 13 of 22)	19	38701649	38714890	13242	2	8193	uc002ohl.3	70666	ENSG00000011332	DPF1	double PHD fingers 1	uc002ohk.3	23094	0
chr19	38760559	38761652	1094	*	Intron (uc002ohr.2/10653, intron 1 of 6)	19	38755098	38783254	28157	1	10653	uc002ohs.2	5461	ENSG00000167642	SPINT2	serine peptidase inhibitor, Kunitz type 2	uc002ohr.2;uc002ohs.2;uc002ohu.1;uc002ohv.1;uc002ohl.3;uc002ohm.3;uc021uty.1;uc002ohn.3;uc010xtw.1;uc002ohw.2;uc002ohx.2;uc010xtx.1;uc010xty.1;uc002ohy.2;uc002ohz.2;uc002oia.2;uc002oib.3;uc002oic.3;uc002ohq.3;uc010efv.3	10653;10653;64073;64073;8193;8193;8193;8193;8193;90522;90522;90522;90522;90522;90522;90522;90522;9424;94274;94274	0;0;-33152;-33152;-45669;-45669;-45669;-40242;-40242;38857;44793;44793;44793;44954;44954;44954;44954;-48832;-13328;-13328
chr19	38807374	38808315	942	*	Promoter (<=1kb)	19	38797501	38806606	9106	2	90522	uc002oib.3	-768	ENSG00000167645	YIF1B	Yip1 interacting factor homolog B, membrane trafficking protein	uc002ohr.2;uc002ohs.2;uc002oif.4;uc002oig.4;uc002oih.4;uc010efw.3;uc002ohu.1;uc002ohv.1;uc002ohw.2;uc002ohx.2;uc010xtx.1;uc010xty.1;uc002ohy.2;uc002ohz.2;uc002oia.2;uc002oib.3;uc002oic.3;uc002oid.3	10653;10653;57828;57828;57828;57828;64073;64073;90522;90522;90522;90522;90522;90522;90522;90522;9424;9424	0;0;-18128;-18128;-18128;-25974;12570;12570;-6865;-929;-929;-929;-768;-768;-768;-768;-2169;-7882
chr19	39154966	39155927	962	*	Intron (uc010egc.2/81, intron 1 of 11)	19	39138267	39221171	82905	1	81	uc021uug.1	16699	ENSG00000130402	ACTN4	actinin alpha 4	uc002oix.1;uc002oiy.1;uc010xuh.2;uc002oiz.1;uc010egc.2;uc002oja.2;uc021uug.1	11184;11184;27335;27335;81;81;81	-46323;-46323;45244;45244;0;0;0
chr19	39373274	39373927	654	*	Intron (uc010egi.2/22933, intron 7 of 13)	19	39358472	39368919	10448	2	126432	uc010xuo.2	-4355	ENSG00000187994	RINL	Ras and Rab interactor like	uc002ojq.3;uc010xuo.2;uc010egi.2;uc002ojs.2;uc002ojt.2;uc002oju.2;uc002ojv.2;uc010egh.2;uc002ojj.1;uc010ege.1;uc002ojk.3;uc002ojl.3;uc021uuh.1;uc021uui.1;uc002ojo.1;uc002ojp.1;uc010xun.2;uc010egk.2;uc002ojw.3;uc002ojx.3;uc002ojy.3;uc002ojz.2;uc002oka.2;uc010xup.1;uc010xuq.1;uc010xur.1;uc010xus.1;uc002okc.3;uc002okd.3;uc002oke.3;uc021uuj.1	126432;126432;22933;22933;22933;22933;22933;22933;3191;3191;3191;3191;3191;3191;3191;3191;3191;4793;4793;4793;4793;54938;54938;54938;54938;54938;54938;6183;6183;6183;643669	-4355;-4355;0;0;0;0;0;0;-42258;-42258;-40885;-40306;-32657;-30295;-42970;-42258;-38530;-16413;-16643;-16643;-16643;46846;47609;47609;66568;47609;47609;-47421;-47667;-47667;28871
chr19	39837970	39839013	1044	*	5' UTR	19	39833108	39875537	42430	1	55095	uc002olb.3	4862	ENSG00000179134	SAMD4B	sterile alpha motif domain containing 4B	uc002okv.3;uc002old.4;uc002ole.2;uc010xuv.3;uc002ola.3;uc002olb.3;uc002olf.3;uc010xux.3;uc002okw.2;uc002okx.4;uc002okz.4	282618;54623;54623;54623;55095;55095;55588;55588;57622;9535;9535	51005;42822;42822;42822;0;0;-42950;-42950;-31994;-11244;-11244
chr19	39837970	39839013	1044	*	5' UTR	19	39833108	39875537	42430	1	55095	uc002olb.3	4862	ENSG00000179134	SAMD4B	sterile alpha motif domain containing 4B	uc002okv.3;uc002old.4;uc002ole.2;uc010xuv.3;uc002ola.3;uc002olb.3;uc002olf.3;uc010xux.3;uc002okw.2;uc002okx.4;uc002okz.4	282618;54623;54623;54623;55095;55095;55588;55588;57622;9535;9535	51005;42822;42822;42822;0;0;-42950;-42950;-31994;-11244;-11244
chr19	39971007	39971566	560	*	Promoter (<=1kb)	19	39971052	39981058	10007	1	92609	uc002olt.2	0	ENSG00000105197	TIMM50	translocase of inner mitochondrial membrane 50	uc010egq.3;uc002olw.2;uc002olx.2;uc021uum.1;uc002olk.3;uc002oll.3;uc002olm.3;uc010xvb.1;uc002oln.4;uc002olo.4;uc002olp.4;uc002olq.4;uc002olr.4;uc002ols.1;uc010egp.1;uc002olt.2;uc002olu.1;uc002olv.1	10683;10683;10683;348303;6217;6217;6217;6829;6829;6829;6829;6829;6829;6829;6829;92609;92609;92609	-17991;-17991;-17991;-34187;-44389;-44389;-44389;34821;34821;34821;34821;34821;34719;12913;8762;0;0;-4665
chr19	40778511	40779423	913	*	Intron (uc002onf.3/208, intron 1 of 13)	19	40745497	40785237	39741	2	208	uc010xvk.1	5814	ENSG00000105221	AKT2	AKT serine/threonine kinase 2	uc002ong.4;uc002onh.4;uc031rkr.1;uc002oni.5;uc002one.3;uc010egs.3;uc002onf.3;uc010egt.3;uc010xvj.2;uc010egu.2;uc010xvk.1;uc021uur.1;uc002ond.3;uc010xvi.2	126526;126526;126526;126526;208;208;208;208;208;208;208;693226;79935;79935	68374;74893;74893;75011;-29302;-7253;0;0;0;0;0;9125;-45914;-45914
chr19	40970146	40972152	2007	*	Promoter (<=1kb)	19	40972148	41066658	94511	1	57731	uc002onx.3	0	ENSG00000160460	SPTBN4	spectrin beta, non-erythrocytic 4	uc002onu.4;uc002onv.4;uc002ont.4;uc002onx.3;uc002ony.3;uc002onz.3;uc010egx.3;uc002onw.2	29946;29946;29950;57731;57731;57731;57731;645	-21641;-19864;-38214;0;0;-974;-46361;0
chr19	40970146	40972152	2007	*	Promoter (<=1kb)	19	40972148	41066658	94511	1	57731	uc002onx.3	0	ENSG00000160460	SPTBN4	spectrin beta, non-erythrocytic 4	uc002onu.4;uc002onv.4;uc002ont.4;uc002onx.3;uc002ony.3;uc002onz.3;uc010egx.3;uc002onw.2	29946;29946;29950;57731;57731;57731;57731;645	-21641;-19864;-38214;0;0;-974;-46361;0
chr19	41107797	41108526	730	*	Promoter (<=1kb)	19	41107277	41135725	28449	1	8425	uc002ooi.1	520	ENSG00000090006	LTBP4	latent transforming growth factor beta binding protein 4	uc002onx.3;uc002ony.3;uc002onz.3;uc010egx.3;uc010egy.1;uc002ooa.3;uc031rks.1;uc002oog.1;uc002ooh.1;uc002ooi.1;uc002ooj.1;uc010xvo.1;uc002ook.1;uc002ool.1;uc002oom.1;uc010xvp.1;uc002oob.3;uc002ooc.3;uc010xvl.1;uc002ooe.3;uc010xvm.2;uc010xvn.2	57731;57731;57731;57731;57731;57731;57731;8425;8425;8425;8425;8425;8425;8425;8425;8425;92799;92799;92799;92799;92799;92799	0;0;134671;89284;71402;71402;30347;0;0;0;-7126;-7548;-9239;-10976;-11296;-11491;25040;25040;24733;24660;23429;21642
chr19	41111551	41112059	509	*	Exon (uc002oog.1/8425, exon 6 of 34)	19	41115652	41135725	20074	1	8425	uc002ooj.1	-3593	ENSG00000090006	LTBP4	latent transforming growth factor beta binding protein 4	uc002onx.3;uc002ony.3;uc002onz.3;uc010egx.3;uc002ooa.3;uc031rks.1;uc002oog.1;uc002ooh.1;uc002ooi.1;uc002ooj.1;uc010xvo.1;uc002ook.1;uc002ool.1;uc002oom.1;uc010xvp.1;uc002oob.3;uc002ooc.3;uc010xvl.1;uc002ooe.3;uc010xvm.2;uc010xvn.2	57731;57731;57731;57731;57731;57731;8425;8425;8425;8425;8425;8425;8425;8425;8425;92799;92799;92799;92799;92799;92799	0;0;138425;93038;75156;34101;0;0;0;-3593;-4015;-5706;-7443;-7763;-7958;28794;28794;28487;28414;27183;25396
chr19	41305345	41306333	989	*	Promoter (<=1kb)	19	41305450	41314346	8897	1	112398	uc002opi.3	0	ENSG00000269858	EGLN2	egl-9 family hypoxia inducible factor 2	uc010xvt.1;uc002opc.2;uc010ehd.3;uc002opg.4;uc002oph.3;uc002opi.3;uc002opl.4;uc010ehe.1;uc010ehf.1;uc002oou.1;uc002oow.1;uc002oox.1;uc002ooy.1;uc010xvs.1;uc002opd.2;uc002ope.2;uc002opf.2;uc002ooz.3;uc021uuu.1;uc002opb.4	100529262;100529262;100529264;112398;112398;112398;1548;1548;1548;284325;284325;284325;284325;284325;53916;53916;53916;6626;8190;8190	27792;23903;0;0;0;0;50019;50019;50018;-49517;-48937;-48937;-49833;-48937;21221;21221;20393;48586;24263;24063
chr19	41305345	41306333	989	*	Promoter (<=1kb)	19	41305450	41314346	8897	1	112398	uc002opi.3	0	ENSG00000269858	EGLN2	egl-9 family hypoxia inducible factor 2	uc010xvt.1;uc002opc.2;uc010ehd.3;uc002opg.4;uc002oph.3;uc002opi.3;uc002opl.4;uc010ehe.1;uc010ehf.1;uc002oou.1;uc002oow.1;uc002oox.1;uc002ooy.1;uc010xvs.1;uc002opd.2;uc002ope.2;uc002opf.2;uc002ooz.3;uc021uuu.1;uc002opb.4	100529262;100529262;100529264;112398;112398;112398;1548;1548;1548;284325;284325;284325;284325;284325;53916;53916;53916;6626;8190;8190	27792;23903;0;0;0;0;50019;50019;50018;-49517;-48937;-48937;-49833;-48937;21221;21221;20393;48586;24263;24063
chr19	41305345	41306333	989	*	Promoter (<=1kb)	19	41305450	41314346	8897	1	112398	uc002opi.3	0	ENSG00000269858	EGLN2	egl-9 family hypoxia inducible factor 2	uc010xvt.1;uc002opc.2;uc010ehd.3;uc002opg.4;uc002oph.3;uc002opi.3;uc002opl.4;uc010ehe.1;uc010ehf.1;uc002oou.1;uc002oow.1;uc002oox.1;uc002ooy.1;uc010xvs.1;uc002opd.2;uc002ope.2;uc002opf.2;uc002ooz.3;uc021uuu.1;uc002opb.4	100529262;100529262;100529264;112398;112398;112398;1548;1548;1548;284325;284325;284325;284325;284325;53916;53916;53916;6626;8190;8190	27792;23903;0;0;0;0;50019;50019;50018;-49517;-48937;-48937;-49833;-48937;21221;21221;20393;48586;24263;24063
chr19	41305345	41306333	989	*	Promoter (<=1kb)	19	41305450	41314346	8897	1	112398	uc002opi.3	0	ENSG00000269858	EGLN2	egl-9 family hypoxia inducible factor 2	uc010xvt.1;uc002opc.2;uc010ehd.3;uc002opg.4;uc002oph.3;uc002opi.3;uc002opl.4;uc010ehe.1;uc010ehf.1;uc002oou.1;uc002oow.1;uc002oox.1;uc002ooy.1;uc010xvs.1;uc002opd.2;uc002ope.2;uc002opf.2;uc002ooz.3;uc021uuu.1;uc002opb.4	100529262;100529262;100529264;112398;112398;112398;1548;1548;1548;284325;284325;284325;284325;284325;53916;53916;53916;6626;8190;8190	27792;23903;0;0;0;0;50019;50019;50018;-49517;-48937;-48937;-49833;-48937;21221;21221;20393;48586;24263;24063
chr19	41328620	41329323	704	*	Distal Intergenic	19	41305450	41314346	8897	1	112398	uc002opi.3	23170	ENSG00000269858	EGLN2	egl-9 family hypoxia inducible factor 2	uc010xvt.1;uc002opc.2;uc010ehd.3;uc002opg.4;uc002oph.3;uc002opi.3;uc002opl.4;uc010ehe.1;uc010ehf.1;uc002opd.2;uc002ope.2;uc002opf.2;uc021uuu.1;uc002opb.4	100529262;100529262;100529264;112398;112398;112398;1548;1548;1548;53916;53916;53916;8190;8190	51067;47178;0;0;0;0;27029;27029;27028;44496;44496;43668;47538;47338
chr19	41339311	41340252	942	*	Distal Intergenic	19	41351861	41356351	4491	2	1548	uc010ehf.1	16099	ENSG00000255974	CYP2A6	cytochrome P450 family 2 subfamily A member 6	uc010xvt.1;uc002opc.2;uc010ehd.3;uc002opg.4;uc002oph.3;uc002opi.3;uc002opl.4;uc010ehe.1;uc010ehf.1;uc002opm.3;uc002opn.3;uc002opo.3;uc002opd.2;uc002ope.2;uc002opf.2	100529262;100529262;100529264;112398;112398;112398;1548;1548;1548;1549;1549;1549;53916;53916;53916	61758;57869;0;0;0;0;16100;16100;16099;48405;48405;193916;55187;55187;54359
chr19	41370255	41371134	880	*	Distal Intergenic	19	41350827	41356352	5526	2	1548	uc010ehe.1	-13903	ENSG00000255974	CYP2A6	cytochrome P450 family 2 subfamily A member 6	uc002opl.4;uc010ehe.1;uc010ehf.1;uc002opm.3;uc002opn.3;uc002opo.3;uc002opp.2	1548;1548;1548;1549;1549;1549;22952	-13903;-13903;-13904;17523;17523;163034;-25597
chr19	41829354	41829913	560	*	3' UTR	19	41816094	41830788	14695	1	90324	uc002oqg.3	13260	ENSG00000142039	CCDC97	coiled-coil domain containing 97	uc002opz.4;uc002oqa.4;uc010ehl.1;uc002oqb.4;uc010ehm.3;uc002oqc.4;uc002oqd.4;uc002oqe.4;uc010ehn.3;uc010xvy.2;uc010ehp.3;uc002oqf.4;uc002oqi.3;uc010ehq.3;uc002oqh.2;uc002oqj.2;uc002oqg.3	11100;11100;11100;11100;11100;11100;11100;11100;11100;11100;11100;11100;641649;641649;7040;80776;90324	60963;60963;60787;59234;59234;59077;59027;59027;58714;58327;51367;21056;-26903;-39958;29918;40165;0
chr19	42703800	42704922	1123	*	Exon (uc002osu.2/162989, exon 5 of 5)	19	42702745	42721944	19200	2	162989	uc002osu.2	17022	ENSG00000160570	DEDD2	death effector domain containing 2	uc002osz.1;uc002osu.2;uc002osv.2;uc002osw.2;uc031rku.1;uc031rkv.1;uc031rkw.1;uc031rkx.1;uc031rky.1;uc031rkz.1;uc031rla.1;uc002otd.4;uc002ote.4;uc002ota.1;uc002otb.1	116115;162989;162989;162989;162989;162989;162989;162989;162989;162989;162989;2077;2077;2931;2931	-19570;0;0;0;0;0;0;0;0;0;0;49958;54387;41123;41814
chr19	42805667	42807433	1767	*	Promoter (<=1kb)	19	42806284	42814965	8682	1	284338	uc002oth.1	0	ENSG00000188368	PRR19	proline rich 19	uc002otl.4;uc002otm.5;uc002ote.4;uc002otf.1;uc002oth.1;uc002oti.3;uc002otj.3;uc002otk.1;uc002otg.2;uc010xwi.1;uc010xwj.1	1954;1954;2077;23152;284338;284338;284338;284339;5050;5050;5050	-22328;-22328;-46358;16850;0;0;-5493;-10044;0;0;0
chr19	42805667	42807433	1767	*	Promoter (<=1kb)	19	42806284	42814965	8682	1	284338	uc002oth.1	0	ENSG00000188368	PRR19	proline rich 19	uc002otl.4;uc002otm.5;uc002ote.4;uc002otf.1;uc002oth.1;uc002oti.3;uc002otj.3;uc002otk.1;uc002otg.2;uc010xwi.1;uc010xwj.1	1954;1954;2077;23152;284338;284338;284338;284339;5050;5050;5050	-22328;-22328;-46358;16850;0;0;-5493;-10044;0;0;0
chr19	44278416	44279380	965	*	Exon (uc002oxl.3/3783, exon 3 of 9)	19	44270685	44285409	14725	2	3783	uc002oxl.3	6029	ENSG00000104783	KCNN4	potassium calcium-activated channel subfamily N member 4	uc002oxm.4;uc002oxn.4;uc002oxl.3;uc002oxj.2;uc002oxk.2;uc010eiy.1	284348;284348;3783;56006;56006;56006	27233;45428;0;-19274;-19274;-19274
chr19	45198529	45199493	965	*	Distal Intergenic	19	45202421	45213986	11566	1	388551	uc010xxd.2	-2928	ENSG00000213892	CEACAM16	CEA cell adhesion molecule 16, tectorial membrane component	uc021uvk.1;uc010xxd.2;uc002ozo.4;uc002ozp.4;uc010ejs.3;uc002ozm.3;uc002ozn.3;uc010xxb.2;uc010xxc.2	100616355;388551;56971;56971;5817;5817;5817;5817;5817	-41527;-2928;23805;23805;51431;51431;51431;51431;51431
chr19	45393500	45394230	731	*	Promoter (<=1kb)	19	45394477	45406937	12461	1	10452	uc002ozz.3	-247	ENSG00000130204	TOMM40	translocase of outer mitochondrial membrane 40	uc002ozz.3;uc002ozx.4;uc002ozy.4;uc002paa.4;uc002pac.1;uc002pad.1;uc002pae.1;uc002paf.1;uc010eju.3;uc021uvl.1;uc021uvm.1;uc002pab.3;uc002ozv.3;uc002ozw.1	10452;10452;10452;10452;341;341;341;341;342;342;342;348;5819;5819	-247;-247;-247;-247;0;0;0;-25204;-35830;-35830;-35830;-14809;44107;44107
chr19	45414205	45414885	681	*	Distal Intergenic	19	45417577	45422606	5030	1	341	uc002pac.1	-2692	ENSG00000130208	APOC1	apolipoprotein C1	uc002pah.3;uc002ozz.3;uc002ozx.4;uc002ozy.4;uc002paa.4;uc010ejv.1;uc010xxf.2;uc010xxg.2;uc002pai.3;uc002pac.1;uc002pad.1;uc002pae.1;uc002paf.1;uc010eju.3;uc021uvl.1;uc021uvm.1;uc021uvn.1;uc002pab.3;uc002ozv.3;uc002ozw.1	100533990;10452;10452;10452;10452;1209;1209;1209;1209;341;341;341;341;342;342;342;344;348;5819;5819	-30610;19728;19728;19728;19728;0;0;0;0;0;0;0;-4549;-15175;-15175;-15175;-36657;5166;64812;64812
chr19	45416270	45416552	283	*	Promoter (1-2kb)	19	45417577	45422606	5030	1	341	uc002pac.1	-1025	ENSG00000130208	APOC1	apolipoprotein C1	uc002pah.3;uc002ozz.3;uc002ozx.4;uc002ozy.4;uc002paa.4;uc010ejv.1;uc010xxf.2;uc010xxg.2;uc002pai.3;uc002pac.1;uc002pad.1;uc002pae.1;uc002paf.1;uc010eju.3;uc021uvl.1;uc021uvm.1;uc021uvn.1;uc002pab.3;uc002ozv.3;uc002ozw.1	100533990;10452;10452;10452;10452;1209;1209;1209;1209;341;341;341;341;342;342;342;344;348;5819;5819	-28943;21793;21793;21793;21793;0;0;0;0;0;0;0;-2882;-13508;-13508;-13508;-34990;7231;66877;66877
chr19	45416855	45418258	1404	*	Promoter (<=1kb)	19	45417577	45422606	5030	1	341	uc002pac.1	0	ENSG00000130208	APOC1	apolipoprotein C1	uc002pah.3;uc002ozz.3;uc002ozx.4;uc002ozy.4;uc002paa.4;uc010ejv.1;uc010xxf.2;uc010xxg.2;uc002pai.3;uc002pac.1;uc002pad.1;uc002pae.1;uc002paf.1;uc010eju.3;uc021uvl.1;uc021uvm.1;uc021uvn.1;uc002pab.3;uc002ozv.3;uc002ozw.1	100533990;10452;10452;10452;10452;1209;1209;1209;1209;341;341;341;341;342;342;342;344;348;5819;5819	-27237;22378;22378;22378;22378;0;0;0;0;0;0;0;-1176;-11802;-11802;-11802;-33284;7816;67462;67462
chr19	45475880	45476501	622	*	5' UTR	19	45458599	45496604	38006	1	1209	uc002pai.3	17281	ENSG00000104853	CLPTM1	CLPTM1 regulator of GABA type A receptor forward trafficking	uc002pah.3;uc010ejv.1;uc010xxf.2;uc010xxg.2;uc002pai.3;uc021uvo.1;uc010eju.3;uc021uvl.1;uc021uvm.1;uc021uvn.1;uc021uvp.1;uc021uvq.1	100533990;1209;1209;1209;1209;1209;342;342;342;344;5971;5971	30385;0;0;0;0;-18990;45820;45820;45820;24338;-28206;-28206
chr19	46389937	46390990	1054	*	Promoter (<=1kb)	19	46386866	46389376	2511	2	26145	uc002pds.1	-561	ENSG00000170604	IRF2BP1	interferon regulatory factor 2 binding protein 1	uc002pds.1;uc002pdr.3;uc002pdt.3;uc002pdu.3;uc002pdn.3;uc002pdo.1;uc002pdp.1;uc002pdq.2	26145;3171;339344;339345;8189;8189;8189;8189	-561;22419;14872;27046;-23389;-30877;-23389;-23389
chr19	46389937	46390990	1054	*	Promoter (<=1kb)	19	46386866	46389376	2511	2	26145	uc002pds.1	-561	ENSG00000170604	IRF2BP1	interferon regulatory factor 2 binding protein 1	uc002pds.1;uc002pdr.3;uc002pdt.3;uc002pdu.3;uc002pdn.3;uc002pdo.1;uc002pdp.1;uc002pdq.2	26145;3171;339344;339345;8189;8189;8189;8189	-561;22419;14872;27046;-23389;-30877;-23389;-23389
chr19	47239859	47240962	1104	*	Exon (uc002pfl.3/29888, exon 4 of 18)	19	47249303	47261832	12530	1	79147	uc002pfn.2	-8341	ENSG00000181027	FKRP	fukutin related protein	uc021uwi.1;uc010eks.3;uc010ekt.3;uc002pfg.3;uc002pfh.3;uc002pfi.3;uc002pfj.3;uc002pfk.3;uc010xye.2;uc002pfl.3;uc002pfm.3;uc010xyf.2;uc010xyg.1;uc010xyh.2;uc002pfq.3;uc002pfr.3;uc002pfs.3;uc002pfn.2;uc002pfp.2	100422913;25865;25865;25865;25865;25865;25865;25865;25865;29888;29888;29888;29888;6510;6510;6510;6510;79147;79147	-27257;-45896;-44617;-22282;-19475;-19475;-19475;-19475;-19475;0;0;0;0;47172;47200;49583;50880;-8341;-8341
chr19	47349226	47349913	688	*	Exon (uc002pft.1/1175, exon 2 of 5)	19	47341423	47354203	12781	2	1175	uc002pft.1	4290	ENSG00000042753	AP2S1	adaptor related protein complex 2 subunit sigma 1	uc010xyi.1;uc002pft.1;uc002pfu.1	100170220;1175;1175	-15265;0;0
chr19	47746729	47747794	1066	*	Distal Intergenic	19	47724079	47736023	11945	2	27113	uc010xyl.2	-10706	ENSG00000105327	BBC3	BCL2 binding component 3	uc021uwl.1;uc021uwk.1;uc002pgc.3;uc002pgd.3;uc010ekw.3;uc010ekx.3;uc010xyk.2;uc002pge.3;uc021uwm.1;uc002pgi.3;uc010xym.2;uc002pgf.4;uc010eky.3;uc010ekz.3;uc010xyl.2	100422832;100422899;10055;10055;10055;10055;10055;10055;255783;255783;26093;27113;27113;27113;27113	-16453;16530;112649;112649;112649;112649;112637;112614;-29865;-30348;-11937;-12278;-10706;-10706;-10706
chr19	47838075	47839518	1444	*	Promoter (<=1kb)	19	47840262	47845272	5011	1	27202	uc002pgk.2	-744	ENSG00000134830	C5AR2	complement C5a receptor 2	uc010ela.1;uc002pgk.2;uc031rll.1;uc002pgj.1;uc010xyn.2;uc010elc.1;uc010xyo.1	27202;27202;27202;728;9704;9704;9704	0;-744;-4226;24971;-13020;-16493;-40690
chr19	48000168	48001069	902	*	Exon (uc002phe.3/8775, exon 4 of 4)	19	47987539	48004854	17316	1	100505681	uc021uwo.1	12629	NA	NAPA-AS1	NAPA antisense RNA 1	uc021uwo.1;uc002pgy.3;uc010xys.2;uc010ele.3;uc002pgx.3;uc010xyq.2;uc010xyr.2;uc010elh.4;uc010eli.4;uc002phg.5;uc010xyt.3;uc002pha.2;uc002phc.2;uc002phd.2;uc002phe.3;uc010elg.2	100505681;11133;11133;6543;6543;6543;6543;84215;84215;84215;84215;8775;8775;8775;8775;8775	0;-12647;-12647;-30492;-24861;-24861;-24861;48168;48168;58044;58044;0;0;0;0;0
chr19	48394469	48395994	1526	*	Distal Intergenic	19	48373723	48389654	15932	2	6822	uc002phr.2	-4815	ENSG00000105398	SULT2A1	sulfotransferase family 2A member 1	uc010elo.1;uc010elp.1;uc010eln.1;uc010xyy.1;uc010xyx.1;uc010xyz.1;uc010xza.1;uc002phq.4;uc002phr.2	100126798;100126798;100126800;100169951;100170218;100170218;100170219;1406;6822	-25692;-41444;-14941;-31042;-20314;-36081;-46804;69370;-4815
chr19	48825086	48825846	761	*	Promoter (<=1kb)	19	48806907	48825191	18285	2	93233	uc002piu.1	0	ENSG00000105479	ODAD1	outer dynein arm docking complex subunit 1	uc002pil.1;uc010elv.1;uc002pim.1;uc002pin.2;uc002piv.2;uc002piz.3;uc002piw.1;uc002pix.1;uc002piy.1;uc010elw.1;uc010xzn.1;uc010xzo.1;uc010xzp.1;uc010xzq.1;uc002piq.2;uc002pir.2;uc002pio.3;uc002pis.1;uc031rlo.1;uc002pit.1;uc002piu.1	163071;163071;163071;163071;2014;23546;55260;55260;55260;55260;55260;55260;55260;55260;93233;93233;93233;93233;93233;93233;93233	51730;50926;50584;40190;-2783;-41805;0;0;0;0;0;0;41340;41340;-17654;-1754;-1438;-18428;-18428;-1242;0
chr19	48835654	48836365	712	*	3' UTR	19	48828629	48833810	5182	1	2014	uc002piv.2	7025	ENSG00000142227	EMP3	epithelial membrane protein 3 (MAM blood group)	uc002pja.1;uc002pjb.1;uc002pil.1;uc010elv.1;uc002pim.1;uc002pin.2;uc002piv.2;uc002piz.3;uc002piw.1;uc002pix.1;uc002piy.1;uc010elw.1;uc010xzn.1;uc010xzo.1;uc010xzp.1;uc010xzq.1;uc002piq.2;uc002pir.2;uc002pio.3;uc002pis.1;uc031rlo.1;uc002pit.1;uc002piu.1	10945;10945;163071;163071;163071;163071;2014;23546;55260;55260;55260;55260;55260;55260;55260;55260;93233;93233;93233;93233;93233;93233;93233	57747;58445;62298;61494;61152;50758;7025;-31286;0;0;0;0;0;0;30821;30821;-28222;-12322;-12006;-28996;-28996;-11810;0
chr19	49122175	49123682	1508	*	Promoter (<=1kb)	19	49122548	49133663	11116	1	56848	uc002pjr.3	0	ENSG00000063176	SPHK2	sphingosine kinase 2	uc002pkb.3;uc002pkc.3;uc002pjx.4;uc002pjy.2;uc010elz.1;uc002pjo.3;uc002pjn.2;uc002pjr.3;uc002pjt.3;uc010xzt.2;uc002pjs.3;uc002pju.3;uc002pjv.3;uc002pjw.3;uc010xzu.1;uc002pjq.2;uc031rlp.1;uc031rlq.1;uc010xzs.2;uc021uwv.2;uc002pka.3;uc010ema.3;uc010xzv.2;uc010xzw.2;uc002pjl.3;uc002pjm.3;uc002pjz.1	126147;126147;1628;1628;1628;171169;54854;56848;56848;56848;56848;56848;56848;56848;56848;6141;6141;6141;6141;6141;653677;653677;653677;653677;6820;6820;770	52582;52582;16957;16957;16957;12175;-5481;0;0;0;0;-3967;-4527;-4544;-5466;0;0;0;0;0;-17614;-17614;-17614;-17614;66746;43182;25769
chr19	49244200	49245166	967	*	Promoter (<=1kb)	19	49223842	49243970	20129	2	54922	uc002pki.3	-230	ENSG00000105538	RASIP1	Ras interacting protein 1	uc002pkk.3;uc002pkl.1;uc002pkm.1;uc002pke.4;uc010emc.3;uc002pkn.1;uc002pko.1;uc002pkf.2;uc002pkg.2;uc010eme.3;uc010emf.3;uc002pkj.3;uc002pkh.3;uc002pki.3	2523;2523;2523;2524;2524;26291;26291;284358;284358;284359;284359;284359;54922;54922	0;11751;13481;44972;44972;-13650;-13982;-23986;-21224;0;0;0;-15362;-230
chr19	49253919	49254709	791	*	5' UTR	19	49255869	49256917	1049	2	2523	uc002pkl.1	2208	ENSG00000174951	FUT1	fucosyltransferase 1 (H blood group)	uc002pkk.3;uc002pkl.1;uc002pkm.1;uc002pke.4;uc010emc.3;uc002pkn.1;uc002pko.1;uc002pkf.2;uc002pkg.2;uc010eme.3;uc010emf.3;uc002pkj.3;uc002pkh.3;uc002pki.3;uc002pkq.4;uc002pkr.3;uc002pks.3;uc002pkt.3;uc010emh.2;uc010emi.2;uc002pku.1;uc010emj.2	2523;2523;2523;2524;2524;26291;26291;284358;284358;284359;284359;284359;54922;54922;587;587;587;587;587;587;587;587	0;2208;3938;54691;54691;-4107;-4439;-33705;-30943;0;0;0;-25081;-9949;59469;59611;59611;59611;59611;59611;56340;59469
chr19	49370241	49370772	532	*	Promoter (1-2kb)	19	49340354	49371884	31531	2	57664	uc002pkx.3	1112	ENSG00000105559	PLEKHA4	pleckstrin homology domain containing A4	uc002pky.4;uc002pla.3;uc002plb.4;uc002pkv.1;uc010emk.1;uc002pkx.3;uc010eml.3;uc002pkz.2	23645;4924;4924;51171;51171;57664;57664;7288	0;-32535;-32535;-30307;-30307;0;0;31224
chr19	49375396	49377604	2209	*	Promoter (<=1kb)	19	49375649	49379319	3671	1	23645	uc002pky.4	0	ENSG00000087074	PPP1R15A	protein phosphatase 1 regulatory subunit 15A	uc002pky.4;uc002pla.3;uc002plb.4;uc002pld.3;uc002pkv.1;uc010emk.1;uc002pkx.3;uc010eml.3;uc002pkz.2	23645;4924;4924;4924;51171;51171;57664;57664;7288	0;-25703;-25703;-44653;-35462;-35462;0;0;24392
chr19	49378346	49380118	1773	*	3' UTR	19	49375649	49379319	3671	1	23645	uc002pky.4	2697	ENSG00000087074	PPP1R15A	protein phosphatase 1 regulatory subunit 15A	uc002pky.4;uc002pla.3;uc002plb.4;uc002pld.3;uc002pkv.1;uc010emk.1;uc002pkx.3;uc010eml.3;uc002pkz.2	23645;4924;4924;4924;51171;51171;57664;57664;7288	0;-23189;-23189;-42139;-38412;-38412;0;0;21878
chr19	49378346	49380118	1773	*	3' UTR	19	49375649	49379319	3671	1	23645	uc002pky.4	2697	ENSG00000087074	PPP1R15A	protein phosphatase 1 regulatory subunit 15A	uc002pky.4;uc002pla.3;uc002plb.4;uc002pld.3;uc002pkv.1;uc010emk.1;uc002pkx.3;uc010eml.3;uc002pkz.2	23645;4924;4924;4924;51171;51171;57664;57664;7288	0;-23189;-23189;-42139;-38412;-38412;0;0;21878
chr19	49378346	49380118	1773	*	3' UTR	19	49375649	49379319	3671	1	23645	uc002pky.4	2697	ENSG00000087074	PPP1R15A	protein phosphatase 1 regulatory subunit 15A	uc002pky.4;uc002pla.3;uc002plb.4;uc002pld.3;uc002pkv.1;uc010emk.1;uc002pkx.3;uc010eml.3;uc002pkz.2	23645;4924;4924;4924;51171;51171;57664;57664;7288	0;-23189;-23189;-42139;-38412;-38412;0;0;21878
chr19	49378346	49380118	1773	*	3' UTR	19	49375649	49379319	3671	1	23645	uc002pky.4	2697	ENSG00000087074	PPP1R15A	protein phosphatase 1 regulatory subunit 15A	uc002pky.4;uc002pla.3;uc002plb.4;uc002pld.3;uc002pkv.1;uc010emk.1;uc002pkx.3;uc010eml.3;uc002pkz.2	23645;4924;4924;4924;51171;51171;57664;57664;7288	0;-23189;-23189;-42139;-38412;-38412;0;0;21878
chr19	49381653	49382628	976	*	Distal Intergenic	19	49375649	49379319	3671	1	23645	uc002pky.4	6004	ENSG00000087074	PPP1R15A	protein phosphatase 1 regulatory subunit 15A	uc002pky.4;uc002pla.3;uc002plb.4;uc002pld.3;uc002pkv.1;uc010emk.1;uc002pkx.3;uc010eml.3;uc002pkz.2	23645;4924;4924;4924;51171;51171;57664;57664;7288	0;-20679;-20679;-39629;-41719;-41719;0;0;19368
chr19	49467872	49468464	593	*	Promoter (<=1kb)	19	49468566	49470135	1570	1	2512	uc002pln.1	-102	ENSG00000087086	FTL	ferritin light chain	uc010yab.2;uc002plr.1;uc002pls.1;uc010emn.1;uc002pln.1;uc002plo.3;uc002ple.1;uc002plp.3;uc010emm.3;uc010xzz.2;uc010yaa.1;uc002pla.3;uc002plb.4;uc002pld.3;uc002plf.1;uc002plg.1;uc002plh.1;uc002plj.3;uc002plk.3;uc002pll.3;uc002plm.3;uc010xzx.2	10856;10856;10856;10856;2512;2512;27294;2997;2997;2997;2997;4924;4924;4924;581;581;581;581;581;581;581;581	-28692;-28692;-28692;-28692;-102;-102;30933;28146;28146;28146;28146;64565;64565;45615;9755;9755;9755;9755;9755;9755;9755;9755
chr19	49588144	49589024	881	*	Promoter (<=1kb)	19	49588465	49611863	23399	1	6625	uc002pmh.3	0	ENSG00000104852	SNRNP70	small nuclear ribonucleoprotein U1 subunit 70	uc010emp.1;uc002plx.3;uc002pmg.3;uc010yah.1;uc002pmf.4;uc002pmq.4;uc002pmp.3;uc002pmh.3;uc002pmk.3;uc002pmm.3;uc021uxh.1;uc002pmr.3;uc010yai.2;uc010emt.3;uc010yaj.1;uc002pms.3;uc002ply.3;uc002pmd.3;uc002pme.3;uc002pmb.4;uc002pmc.3	100126780;114335;3743;4909;4909;55150;64130;6625;6625;6625;6625;8541;8541;8541;8541;8541;93659;94027;94027;94115;94115	47867;-47953;-11946;-19811;-21025;33373;-28594;0;0;0;-16386;-33639;-33639;-42522;-42522;-43081;41042;-28292;-27136;-35776;-28292
chr19	50323364	50324149	786	*	Promoter (1-2kb)	19	50321536	50340237	18702	1	81857	uc010ybe.2	1828	ENSG00000104973	MED25	mediator complex subunit 25	uc002ppy.4;uc021uxw.2;uc002pqg.3;uc002pqi.3;uc021uxx.1;uc002pqj.3;uc010enj.1;uc002ppn.3;uc002ppo.3;uc002ppp.1;uc010enk.3;uc010ybf.2;uc002pqb.4;uc002pqa.3;uc002pqd.3;uc002pqe.2;uc002pqf.1;uc002ppq.2;uc002ppt.2;uc002ppu.2;uc010ybd.2;uc010enl.2;uc002ppw.2;uc010ybe.2;uc002ppx.1;uc031rmf.1;uc002pql.5;uc002pqm.5;uc002pqn.5;uc031rmg.1	100506033;100616313;11284;11284;11284;11284;160;160;160;160;160;53635;53635;53635;53635;53635;53635;80199;80199;80199;80199;81857;81857;81857;81857;84335;84335;84335;84335;84335	30784;-33699;46109;46325;46325;46673;53184;53184;53184;18560;14654;-29843;-29843;-29843;-30267;-30267;-30267;-6797;-6797;-6797;-6797;1828;0;0;-8894;0;0;0;0;0
chr19	50375949	50376437	489	*	Exon (uc031rmf.1/84335, exon 2 of 5)	19	50372290	50379506	7217	2	84335	uc031rmf.1	3069	ENSG00000204673	AKT1S1	AKT1 substrate 1	uc002ppy.4;uc021uxw.2;uc021uxz.2;uc002pqg.3;uc002pqi.3;uc021uxx.1;uc002pqj.3;uc002prb.4;uc002pqx.3;uc002pqy.3;uc002pqz.3;uc002pra.3;uc002prc.3;uc031rmh.1;uc002pqt.1;uc021uxy.2;uc002pqu.2;uc002pqv.2;uc010eno.3;uc010ybf.2;uc002pqb.4;uc002pqa.3;uc002pqd.3;uc002pqe.2;uc002pqf.1;uc010enn.2;uc002pqo.3;uc010ybg.2;uc002pqp.3;uc002pqr.3;uc002ppw.2;uc010ybe.2;uc002ppx.1;uc031rmf.1;uc002pql.5;uc002pqm.5;uc0…	100506033;100616313;100616314;11284;11284;11284;11284;23636;23636;23636;23636;23636;23636;23636;259307;259307;259307;259307;259307;53635;53635;53635;53635;53635;53635;79735;79735;79735;79735;79735;81857;81857;81857;84335;84335;84335;84335;84335	-21016;18101;-14995;-5691;-5475;-5475;-5127;56359;56362;56551;56551;56551;56551;56324;23710;56359;56551;56551;56551;21957;21957;21957;21533;21533;21533;-4245;-4245;-4245;-4956;-6054;0;0;42906;0;0;0;0;0
chr19	50886909	50887458	550	*	Promoter (<=1kb)	19	50887580	50921275	33696	1	5424	uc002psb.5	-122	ENSG00000062822	POLD1	DNA polymerase delta 1, catalytic subunit	uc002prw.3;uc002psf.2;uc002psb.5;uc002psc.5;uc010enx.4;uc010eny.4;uc002psd.3;uc002pse.3;uc010ycc.2;uc021uyc.1;uc002prv.5;uc002psa.5;uc010enw.4;uc002prx.3	256236;4606;5424;5424;5424;5424;6689;6689;6689;6689;7376;7376;7376;9476	-38904;-48702;-122;-122;-122;-14650;-34737;-34737;-34737;-34737;53960;7417;7417;-17978
chr19	52049729	52051794	2066	*	Distal Intergenic	19	52032644	52035110	2467	2	946	uc010epb.2	-14619	ENSG00000105492	SIGLEC6	sialic acid binding Ig like lectin 6	uc002pxd.2;uc002pxb.3;uc002pww.1;uc002pwx.1;uc010eoy.1;uc002pwy.3;uc002pwz.3;uc002pxa.3;uc010eoz.2;uc010ydb.2;uc010ydc.2;uc010epa.2;uc010epb.2	729975;7728;89858;89858;89858;946;946;946;946;946;946;946;946	45839;-22737;-46082;-44686;-44686;-14619;-14619;-14619;-14619;-14619;-14619;-14619;-14619
chr19	52288003	52288827	825	*	Distal Intergenic	19	52298411	52329334	30924	1	2359	uc002pxt.1	-9584	ENSG00000187474	FPR3	formyl peptide receptor 3	uc002pxq.3;uc021uyn.1;uc002pxr.3;uc002pxs.4;uc010epf.3;uc002pxt.1	2357;2357;2358;2358;2358;2359	-32853;-32853;23550;23550;21388;0
chr19	52299174	52300480	1307	*	Promoter (<=1kb)	19	52298411	52329334	30924	1	2359	uc002pxt.1	763	ENSG00000187474	FPR3	formyl peptide receptor 3	uc002pxq.3;uc021uyn.1;uc002pxr.3;uc002pxs.4;uc010epf.3;uc002pxt.1	2357;2357;2358;2358;2358;2359	-44024;-44024;34721;34721;32559;0
chr19	52303101	52304561	1461	*	Intron (uc002pxt.1/2359, intron 1 of 1)	19	52298411	52329334	30924	1	2359	uc002pxt.1	4690	ENSG00000187474	FPR3	formyl peptide receptor 3	uc002pxq.3;uc021uyn.1;uc002pxr.3;uc002pxs.4;uc010epf.3;uc002pxt.1	2357;2357;2358;2358;2358;2359	-47951;-47951;38648;38648;36486;0
chr19	55739748	55740797	1050	*	Promoter (<=1kb)	19	55738002	55740141	2140	2	255043	uc002qjt.3	0	ENSG00000180089	TMEM86B	transmembrane protein 86B	uc002qjv.3;uc002qjw.4;uc002qjx.3;uc002qkc.3;uc002qkd.3;uc002qjt.3;uc002qju.3;uc002qjq.3;uc010esv.3;uc002qjs.2;uc002qjm.1;uc002qjp.2;uc002qjn.1;uc002qjo.1	22870;22870;23640;23640;23640;255043;255043;5794;5794;5794;6861;6861;6861;6861	17943;29241;50427;50954;50954;0;0;-18874;-18874;-18874;-48279;-48279;-48028;-48028
chr19	55954788	55956034	1247	*	Promoter (<=1kb)	19	55940105	55954230	14126	2	729956	uc002qkz.3	-558	ENSG00000187902	SHISA7	shisa family member 7	uc002qkx.1;uc021vbw.1;uc002qlg.4;uc002qle.2;uc002qkz.3;uc002qla.3;uc002qlb.3;uc002qlc.3;uc002qld.3	27338;284297;284297;57106;729956;79763;79763;79763;89887	-35463;-43836;-43836;-40523;-558;17015;17015;17015;-31665
chr19	56637124	56637748	625	*	Distal Intergenic	19	56613019	56632649	19631	2	126208	uc002qml.1	-4475	ENSG00000142409	ZNF787	zinc finger protein 787	uc010eth.1;uc002qml.1;uc002qmm.3;uc002qmn.2;uc002qmo.1;uc010eti.2	126208;126208;55311;55311;85569;85569	-4475;-4475;-14787;-14787;-49641;-49641
chr19	59095639	59097110	1472	*	3' UTR	19	59086766	59110852	24087	1	65996	uc010euw.3	8873	ENSG00000293115	CENPBD2P	CENPB DNA-binding domains containing 2, pseudogene	uc002qtm.4;uc002qtg.1;uc010eut.1;uc002qth.1;uc002qti.3;uc002qtj.3;uc002qtk.3;uc010eux.4;uc010euw.3;uc002qtn.3;uc002qto.3;uc031rnj.1;uc010euu.1;uc002qtl.4	100131691;10155;10155;10155;27243;27243;27243;65996;65996;7593;7593;7593;7593;9040	25086;39803;39803;35978;-29634;-29284;-29153;0;0;-10697;-10697;-10697;-11497;-25296
chr2	6986624	6988288	1665	*	Intron (uc002qyn.2/129607, intron 2 of 2)	2	6980684	6991814	11131	2	129607	uc002qyn.2	3526	ENSG00000134326	CMPK2	cytidine/uridine monophosphate kinase 2	uc002qyn.2;uc010yis.2;uc002qyo.4;uc010ewv.4;uc031rno.1;uc002qyp.1	129607;129607;129607;129607;129607;91543	0;0;17662;17662;18478;-29508
chr2	8755575	8756774	1200	*	Distal Intergenic	2	8822113	8824583	2471	1	3398	uc002qza.3	-65339	ENSG00000115738	ID2	inhibitor of DNA binding 2	NA	NA	NA
chr2	9034188	9035168	981	*	Intron (uc002qzg.1/129642, intron 4 of 12)	2	8874785	8977755	102971	2	57498	uc010yiw.1	-56433	ENSG00000134313	KIDINS220	kinase D interacting substrate 220	uc002qzg.1;uc010yix.1	129642;129642	0;0
chr2	10168910	10169524	615	*	Distal Intergenic	2	10183682	10194963	11282	1	8462	uc002raf.1	-14158	ENSG00000172059	KLF11	KLF transcription factor 11	uc002rag.2;uc002raa.3;uc002rab.3;uc002rad.3;uc010yjb.2;uc002raf.1;uc021vdq.1;uc010yjc.2	192668;29841;29841;29841;29841;8462;8462;8462	51014;77118;77118;77118;77118;-14158;-14432;-14848
chr2	11538506	11539328	823	*	Intron (uc031rnr.1/100874055, intron 1 of 2)	2	11534107	11543203	9097	1	100874055	uc031rnr.1	4399	ENSG00000224177	LINC00570	long intergenic non-protein coding RNA 570	uc031rnr.1;uc002rbe.4;uc002rbf.4;uc002rbg.4;uc002rbh.4;uc002rbi.4;uc002rbj.2;uc010yjl.3	100874055;1876;1876;1876;1876;1876;1876;1876	0;66975;66975;66975;66975;66975;66975;66975
chr2	12107859	12108887	1029	*	Distal Intergenic	2	11977059	11977112	54	2	100422996	uc021vea.1	-130747	ENSG00000265172	MIR4262	microRNA 4262	NA	NA	NA
chr2	16931098	16932490	1393	*	Distal Intergenic	2	16730730	16847134	116405	2	81553	uc002rck.2	-83964	ENSG00000197872	CYRIA	CYFIP related Rac1 interactor A	NA	NA	NA
chr2	21450996	21451951	956	*	Distal Intergenic	2	21224301	21266945	42645	2	338	uc002red.3	-184051	ENSG00000084674	APOB	apolipoprotein B	NA	NA	NA
chr2	25445336	25446161	826	*	Distal Intergenic	2	25455830	25475184	19355	2	1788	uc002rgb.4	29023	ENSG00000119772	DNMT3A	DNA methyltransferase 3 alpha	uc002rgb.4;uc002rgc.4;uc002rgd.4;uc010eyi.4	1788;1788;1788;1788	29023;118623;119298;119298
chr2	30414369	30415337	969	*	Distal Intergenic	2	30454397	30482899	28503	1	81606	uc002rne.2	-39060	ENSG00000213626	LBH	LBH regulator of WNT signaling pathway	uc002rmz.4;uc002rna.4;uc002rnb.4;uc002rnc.4;uc010ezn.3;uc002rnd.3;uc002rne.2;uc031rnx.1	51646;51646;51646;51646;51646;51646;81606;81606	44619;44619;44619;44619;44619;43987;-39060;-39686
chr2	30513314	30514249	936	*	Distal Intergenic	2	30455023	30482899	27877	1	81606	uc031rnx.1	58291	ENSG00000213626	LBH	LBH regulator of WNT signaling pathway	uc002rne.2;uc031rnx.1	81606;81606	58917;58291
chr2	43357922	43358968	1047	*	Distal Intergenic	2	43449541	43453745	4205	2	678	uc002rsv.4	94777	ENSG00000152518	ZFP36L2	ZFP36 ring finger protein like 2	NA	NA	NA
chr2	43395806	43397081	1276	*	Distal Intergenic	2	43449541	43453745	4205	2	678	uc002rsv.4	56664	ENSG00000152518	ZFP36L2	ZFP36 ring finger protein like 2	NA	NA	NA
chr2	43395806	43397081	1276	*	Distal Intergenic	2	43449541	43453745	4205	2	678	uc002rsv.4	56664	ENSG00000152518	ZFP36L2	ZFP36 ring finger protein like 2	NA	NA	NA
chr2	43404416	43406711	2296	*	Distal Intergenic	2	43449541	43453745	4205	2	678	uc002rsv.4	47034	ENSG00000152518	ZFP36L2	ZFP36 ring finger protein like 2	uc010ynx.1;uc002rsv.4	100129726;678	-47639;47034
chr2	47563367	47564616	1250	*	Intron (uc002rvu.1/uc002rvu.1, intron 1 of 2)	2	47596287	47614167	17881	1	4072	uc002rvx.3	-31671	ENSG00000119888	EPCAM	epithelial cell adhesion molecule	uc002rvx.3;uc021vhd.1	4072;693144	-31671;-40198
chr2	48491813	48492972	1160	*	Distal Intergenic	2	48541795	48606434	64640	1	3344	uc002rwh.1	-48823	ENSG00000170802	FOXN2	forkhead box N2	uc002rwh.1	3344	-48823
chr2	60722062	60722958	897	*	Intron (uc002sab.3/53335, intron 2 of 4)	2	60684329	60763325	78997	2	53335	uc002sad.1	40367	ENSG00000119866	BCL11A	BCL11 transcription factor A	uc002sab.3;uc002sac.3;uc010ypi.2;uc010ypj.2;uc002sad.1;uc002sae.1;uc002saf.1;uc010fcg.3	53335;53335;53335;53335;53335;53335;53335;53335	0;0;0;0;0;0;0;57675
chr2	62522975	62525088	2114	*	Distal Intergenic	2	62432961	62433052	92	1	100847087	uc031rod.1	90014	ENSG00000266097	MIR5192	microRNA 5192	NA	NA	NA
chr2	62522975	62525088	2114	*	Distal Intergenic	2	62432961	62433052	92	1	100847087	uc031rod.1	90014	ENSG00000266097	MIR5192	microRNA 5192	NA	NA	NA
chr2	68579328	68580679	1352	*	Distal Intergenic	2	68592322	68624585	32264	1	5341	uc002sen.4	-11643	ENSG00000115956	PLEK	pleckstrin	uc002sej.4;uc002sek.4;uc010fdd.1;uc002sen.4;uc010fde.3	25927;25927;25927;5341;5341	-32145;-32145;-32309;-11643;-11643
chr2	68630117	68630863	747	*	Distal Intergenic	2	68592322	68624585	32264	1	5341	uc010fde.3	37795	ENSG00000115956	PLEK	pleckstrin	uc002sen.4;uc010fde.3	5341;5341	37795;37795
chr2	70200251	70200971	721	*	Intron (uc010fdn.2/400960, intron 2 of 2)	2	70187224	70189397	2174	2	151516	uc002sfz.4	-10854	ENSG00000244617	ASPRV1	aspartic peptidase retroviral like 1	uc002sfz.4;uc010fdn.2;uc002sga.3;uc002sfy.3;uc010yqp.2;uc010yqq.2;uc010yqr.2;uc010yqs.2	151516;400960;400960;4084;4084;4084;4084;4084	-10854;0;0;58078;58078;58078;58078;58078
chr2	87756183	87757719	1537	*	Promoter (1-2kb)	2	87754974	87821030	66057	1	112597	uc010fgz.3	1209	ENSG00000222041	CYTOR	cytoskeleton regulator RNA	uc002ssk.4;uc010fgy.3;uc010fgz.3;uc002srs.4	112597;112597;112597;64795	0;0;0;0
chr2	87815661	87816705	1045	*	Intron (uc002srs.4/64795, intron 3 of 10)	2	87754974	87821030	66057	1	112597	uc010fgz.3	60687	ENSG00000222041	CYTOR	cytoskeleton regulator RNA	uc002ssk.4;uc010fgy.3;uc010fgz.3;uc002srs.4	112597;112597;112597;64795	0;0;0;0
chr2	87841791	87843132	1342	*	Intron (uc002srs.4/64795, intron 3 of 10)	2	87929274	87929353	80	1	100616499	uc021vkl.1	-86142	ENSG00000265507	MIR4435-1	microRNA 4435-1	uc002ssk.4;uc010fgy.3;uc010fgz.3;uc002srs.4	112597;112597;112597;64795	0;0;0;0
chr2	102685493	102686989	1497	*	Promoter (<=1kb)	2	102686836	102796334	109499	1	3554	uc010fix.3	0	ENSG00000115594	IL1R1	interleukin 1 receptor type 1	uc010fix.3;uc002tbo.2;uc002tbm.3;uc002tbn.4;uc031rop.1	3554;7850;7850;7850;7850	0;77187;77187;70069;60516
chr2	111943051	111943787	737	*	Distal Intergenic	2	111878491	111926022	47532	1	10018	uc021vms.1	64560	ENSG00000153094	BCL2L11	BCL2 like 11	uc021vmo.1;uc002tgu.1;uc002tgv.1;uc002tgw.2;uc002tgx.2;uc002tgy.2;uc002tgz.2;uc002tha.2;uc002thb.2;uc002thc.2;uc002thd.2;uc010fkd.2;uc010fke.2;uc021vmp.1;uc021vmq.1;uc021vmr.1;uc021vms.1;uc002the.2	10018;10018;10018;10018;10018;10018;10018;10018;10018;10018;10018;10018;10018;10018;10018;10018;10018;541471	64560;64560;64560;64560;64560;64560;64560;64560;64560;64560;64560;64560;64560;64560;64560;64560;64560;0
chr2	112164885	112166069	1185	*	Intron (uc002the.2/541471, intron 1 of 5)	2	112078589	112078668	80	2	100616499	uc021vmu.1	-86217	ENSG00000265507	MIR4435-1	microRNA 4435-1	uc002the.2;uc010yxl.1;uc002thf.4	541471;541471;541471	0;0;0
chr2	112249959	112251357	1399	*	Promoter (1-2kb)	2	111965359	112252692	287334	2	541471	uc002the.2	1335	ENSG00000172965	MIR4435-2HG	MIR4435-2 host gene	uc002the.2;uc010yxl.1;uc002thf.4	541471;541471;541471	0;0;0
chr2	112249959	112251357	1399	*	Promoter (1-2kb)	2	111965359	112252692	287334	2	541471	uc002the.2	1335	ENSG00000172965	MIR4435-2HG	MIR4435-2 host gene	uc002the.2;uc010yxl.1;uc002thf.4	541471;541471;541471	0;0;0
chr2	113441176	113442354	1179	*	Distal Intergenic	2	113413965	113418149	4185	1	6574	uc002tic.1	27211	ENSG00000144136	SLC20A1	solute carrier family 20 member 1	uc010fkq.2;uc002tib.3;uc002tic.1	400999;6574;6574	-39419;37742;27211
chr2	113463484	113464460	977	*	Distal Intergenic	2	113413965	113418149	4185	1	6574	uc002tic.1	49519	ENSG00000144136	SLC20A1	solute carrier family 20 member 1	uc002tie.2;uc002tif.2;uc010yxp.1;uc010yxq.1;uc002tib.3;uc002tic.1	150468;150468;150468;150468;6574;6574	57794;57794;57794;57794;60050;49519
chr2	114337868	114338782	915	*	Distal Intergenic	2	114341230	114356613	15384	1	375260	uc002tka.3	-2448	ENSG00000291134	WASH2P	WASP family homolog 2, pseudogene	uc002tkm.4;uc002tkn.4;uc010flb.3;uc002tks.4;uc002tkp.4;uc002tkr.3;uc002tkq.3;uc002tkk.2;uc010yxy.1;uc010yxz.1;uc010yya.2;uc010yyb.2;uc002tka.3;uc010fkx.1;uc002tkd.3;uc002tke.1;uc010fkz.1;uc002tkf.2;uc002tkh.3;uc002tjz.3;uc010yxx.2	11159;11159;11159;11159;11159;11159;11159;118433;118433;118433;118433;118433;375260;375260;375260;375260;375260;375260;375260;654412;84771	-46035;-46035;-46035;-46069;-46159;-46159;-47349;45933;45933;45933;45933;45933;-2448;-7345;-7345;-12461;-13855;-14479;-14863;2909;20371
chr2	114367053	114368746	1694	*	Distal Intergenic	2	114356605	114359153	2549	2	84771	uc010yxx.2	-7900	ENSG00000290825	DDX11L2	DEAD/H-box helicase 11 like 2 (pseudogene)	uc002tkm.4;uc002tkn.4;uc010flb.3;uc002tks.4;uc002tkp.4;uc002tkr.3;uc002tkq.3;uc002tkk.2;uc010yxy.1;uc010yxz.1;uc010yya.2;uc010yyb.2;uc002tka.3;uc010fkx.1;uc002tkd.3;uc002tke.1;uc010fkz.1;uc002tkf.2;uc002tkh.3;uc002tjz.3;uc010yxx.2	11159;11159;11159;11159;11159;11159;11159;118433;118433;118433;118433;118433;375260;375260;375260;375260;375260;375260;375260;654412;84771	-16071;-16071;-16071;-16105;-16195;-16195;-17385;15969;15969;15969;15969;15969;25823;20926;20926;15810;14416;13792;13408;32094;-7900
chr2	119980927	119981671	745	*	Promoter (<=1kb)	2	119981384	120023227	41844	1	55240	uc002tlp.3	0	ENSG00000115107	STEAP3	STEAP3 metalloreductase	uc002tlp.3;uc002tlq.3;uc002tlr.3;uc010fle.3	55240;55240;55240;55240	0;0;0;0
chr2	121008584	121010287	1704	*	Promoter (<=1kb)	2	121010414	121052286	41873	1	5899	uc002tmk.3	-127	ENSG00000144118	RALB	RAS like proto-oncogene B	uc010yys.2;uc002tmk.3;uc002tml.3;uc010yyt.2;uc002tmj.2	5899;5899;5899;5899;79134	0;-127;-127;-127;-27600
chr2	121008584	121010287	1704	*	Promoter (<=1kb)	2	121010414	121052286	41873	1	5899	uc002tmk.3	-127	ENSG00000144118	RALB	RAS like proto-oncogene B	uc010yys.2;uc002tmk.3;uc002tml.3;uc010yyt.2;uc002tmj.2	5899;5899;5899;5899;79134	0;-127;-127;-127;-27600
chr2	127402371	127403285	915	*	Distal Intergenic	2	127413511	127454251	40741	1	2995	uc002tnq.4	-10226	ENSG00000136732	GYPC	glycophorin C (Gerbich blood group)	uc002tnq.4;uc002tnr.4;uc010flv.4	2995;2995;2995	0;0;0
chr2	127419106	127420120	1015	*	Intron (uc002tnq.4/2995, intron 1 of 3)	2	127413511	127454251	40741	1	2995	uc010flv.4	5595	ENSG00000136732	GYPC	glycophorin C (Gerbich blood group)	uc002tnq.4;uc002tnr.4;uc010flv.4	2995;2995;2995	0;0;0
chr2	129230413	129231306	894	*	Distal Intergenic	2	129023054	129076171	53118	2	9394	uc002tpt.4	-154242	ENSG00000136720	HS6ST1	heparan sulfate 6-O-sulfotransferase 1	NA	NA	NA
chr2	140622014	140623714	1701	*	Distal Intergenic	2	139654894	139656744	1851	1	647012	uc021vqc.1	967120	NA	YY1P2	YY1 transcription factor pseudogene 2	NA	NA	NA
chr2	145338099	145341066	2968	*	Distal Intergenic	2	145268952	145277958	9007	2	9839	uc031rpm.1	-60141	ENSG00000169554	ZEB2	zinc finger E-box binding homeobox 2	NA	NA	NA
chr2	145338099	145341066	2968	*	Distal Intergenic	2	145268952	145277958	9007	2	9839	uc031rpm.1	-60141	ENSG00000169554	ZEB2	zinc finger E-box binding homeobox 2	NA	NA	NA
chr2	145338099	145341066	2968	*	Distal Intergenic	2	145268952	145277958	9007	2	9839	uc031rpm.1	-60141	ENSG00000169554	ZEB2	zinc finger E-box binding homeobox 2	NA	NA	NA
chr2	159991586	159992504	919	*	Promoter (<=1kb)	2	159992705	160007288	14584	1	85461	uc002uah.1	-201	ENSG00000115183	TANC1	tetratricopeptide repeat, ankyrin repeat and coiled-coil containing 1	uc010fol.1;uc002uag.3;uc010zcm.2;uc010fom.1;uc002uah.1	85461;85461;85461;85461;85461	0;0;0;0;0
chr2	160003493	160004310	818	*	Intron (uc010fol.1/85461, intron 5 of 11)	2	159992705	160007288	14584	1	85461	uc002uah.1	10788	ENSG00000115183	TANC1	tetratricopeptide repeat, ankyrin repeat and coiled-coil containing 1	uc010fol.1;uc002uag.3;uc010zcm.2;uc010fom.1;uc002uah.1	85461;85461;85461;85461;85461	0;0;0;0;0
chr2	171678916	171680219	1304	*	Intron (uc002ugh.3/2571, intron 3 of 6)	2	171673200	171717659	44460	1	2571	uc002ugi.3	5716	ENSG00000128683	GAD1	glutamate decarboxylase 1	uc031rpy.1;uc031rpz.1;uc002ugh.3;uc002ugi.3;uc010fqc.3	100505695;100505695;2571;2571;2571	51312;51312;0;0;-25358
chr2	178129203	178130313	1111	*	Promoter (<=1kb)	2	178095031	178129859	34829	2	4780	uc002ulh.5	0	ENSG00000116044	NFE2L2	NFE2 like bZIP transcription factor 2	uc002ulj.1;uc021vsu.1;uc002ulb.1;uc002ulc.1;uc002uld.2;uc002ule.3;uc002ulg.5;uc010zfa.3;uc002ulh.5;uc002uli.5;uc010fra.3;uc010frb.3	100130691;100422824;220988;220988;220988;220988;4780;4780;4780;4780;4780;4780	57811;-8465;51781;51781;51715;47799;-586;-586;0;0;-586;-586
chr2	208630130	208631156	1027	*	3' UTR	2	208627310	208634143	6834	2	7855	uc002vcj.3	2987	ENSG00000163251	FZD5	frizzled class receptor 5	uc021vvq.1;uc002vch.3;uc002vci.3;uc002vcj.3	100616361;151195;151195;7855	10599;53866;53866;0
chr2	209436143	209437177	1035	*	Exon (uc010fuo.1/5746, exon 3 of 7)	2	209353737	209704818	351082	1	5746	uc010fuo.1	82406	ENSG00000144407	PTH2R	parathyroid hormone 2 receptor	uc010fuo.1	5746	0
chr2	218692177	218692834	658	*	Intron (uc002vgr.2/7145, intron 20 of 30)	2	218664512	218678739	14228	2	7145	uc002vgq.2	-13438	ENSG00000079308	TNS1	tensin 1	uc002vgq.2;uc002vgr.2;uc002vgs.2;uc002vgt.2;uc010zjv.1;uc010fvi.1;uc010fvj.1;uc010fvk.1;uc002vgu.3	7145;7145;7145;7145;7145;7145;7145;7145;7145	-13438;0;0;0;0;57769;77350;174884;75702
chr2	219151301	219154046	2746	*	Promoter (<=1kb)	2	219138917	219151572	12656	2	64114	uc002vho.1	0	ENSG00000135926	TMBIM1	transmembrane BAX inhibitor motif containing 1	uc002vhd.4;uc002vhe.3;uc002vhf.3;uc002vhk.3;uc002vhl.3;uc010zjw.1;uc010zjx.1;uc010zjy.1;uc002vhm.2;uc002vhn.3;uc002vhq.3;uc002vho.1;uc002vhp.1;uc010zjz.1;uc010zka.2	10109;10109;10109;14;14;151306;151306;151306;25953;25953;25953;64114;64114;64114;64114	69484;69181;51237;-16408;-16408;25563;25563;25563;16186;0;-33856;0;0;0;0
chr2	219151301	219154046	2746	*	Promoter (<=1kb)	2	219138917	219151572	12656	2	64114	uc002vho.1	0	ENSG00000135926	TMBIM1	transmembrane BAX inhibitor motif containing 1	uc002vhd.4;uc002vhe.3;uc002vhf.3;uc002vhk.3;uc002vhl.3;uc010zjw.1;uc010zjx.1;uc010zjy.1;uc002vhm.2;uc002vhn.3;uc002vhq.3;uc002vho.1;uc002vhp.1;uc010zjz.1;uc010zka.2	10109;10109;10109;14;14;151306;151306;151306;25953;25953;25953;64114;64114;64114;64114	69484;69181;51237;-16408;-16408;25563;25563;25563;16186;0;-33856;0;0;0;0
chr2	219258437	219258966	530	*	Exon (uc010zkc.1/6556, exon 13 of 15)	2	219263061	219270664	7604	1	58190	uc021vwv.1	-4095	ENSG00000144579	CTDSP1	CTD small phosphatase 1	uc002vhn.3;uc002vhq.3;uc002vhr.3;uc010zkd.2;uc021vwv.1;uc002vhx.3;uc002vhy.3;uc002vhz.3;uc010zkb.1;uc010fvp.1;uc010fvq.1;uc010zkc.1;uc002vhu.1;uc002vhv.3;uc002vhw.3;uc010fvr.3;uc002via.3;uc010zke.2;uc002vib.3;uc002vic.1	25953;25953;375307;407017;58190;58190;58190;58190;6556;6556;6556;6556;6556;6556;6556;6556;7429;7429;7429;7429	0;70535;36858;-8403;-4095;-5512;-5512;-7855;11685;11685;11685;0;0;0;0;0;-24872;-24872;-29514;-29525
chr2	220143850	220144876	1027	*	Promoter (<=1kb)	2	220144040	220147382	3343	1	3300	uc010zla.1	0	ENSG00000135924	DNAJB2	DnaJ heat shock protein family (Hsp40) member B2	uc010zla.1;uc002vkw.1;uc002vkx.1;uc010zlb.1;uc002vlb.3;uc010zle.3;uc002vlc.4;uc010zld.1;uc010zkv.1;uc010zkw.1;uc002vkg.3;uc002vkh.3;uc002vki.3;uc002vkj.1;uc010zlc.2;uc002vkz.3;uc002vla.3;uc002vkt.1;uc010zkz.1;uc002vke.1;uc002vkf.1;uc002vkk.3;uc010zkx.2;uc002vkm.3;uc002vkn.3;uc002vku.3;uc002vkv.1;uc002vko.2;uc002vks.2;uc010zky.2;uc010fwf.3;uc002vkp.2	3300;3300;3300;3300;389075;389075;389075;406944;55139;55139;55139;55139;55139;55139;5798;5798;5798;7277;7277;79065;79065;79411;79411;79411;79411;80086;80086;8576;8576;8576;8576;8576	0;0;0;-2544;51024;52584;53023;14046;49371;49371;49371;49371;49240;48503;28853;29419;29419;-25212;-24520;-49489;-49489;-38843;-35497;-33719;-33719;25885;25885;33658;33658;33649;33649;33649
chr2	231523531	231524500	970	*	Distal Intergenic	2	231555636	231565244	9609	2	151475	uc002vqw.1	40744	ENSG00000226125	LINC01907	long intergenic non-protein coding RNA 1907	uc002vqw.1	151475	40744
chr2	233955828	233957242	1415	*	Intron (uc010zmo.2/3635, intron 2 of 25)	2	233925036	234116549	191514	1	3635	uc010zmp.2	30792	ENSG00000168918	INPP5D	inositol polyphosphate-5-phosphatase D	uc010zmo.2;uc010zmp.2	3635;3635	0;0
chr2	234074360	234074997	638	*	Intron (uc010zmo.2/3635, intron 12 of 25)	2	234160217	234204320	44104	1	55054	uc002vtx.2	-85220	ENSG00000085978	ATG16L1	autophagy related 16 like 1	uc010zmo.2;uc010zmp.2	3635;3635	0;0
chr2	238848407	238849735	1329	*	Distal Intergenic	2	238875587	239008054	132468	1	100533179	uc002vxm.4	-25852	ENSG00000258984	UBE2F-SCLY	UBE2F-SCLY readthrough (NMD candidate)	uc002vxm.4;uc002vxj.3;uc002vxk.3;uc010znn.2;uc010zno.2;uc010znp.2;uc031rrw.1;uc031rrx.1;uc031rry.1;uc031rrz.1	100533179;10267;140739;140739;140739;140739;140739;140739;140739;140739	-25852;80220;-25852;-25852;-25852;-25852;-25852;-25852;-25852;-27700
chr2	238872096	238874251	2156	*	Promoter (1-2kb)	2	238875587	239008054	132468	1	100533179	uc002vxm.4	-1336	ENSG00000258984	UBE2F-SCLY	UBE2F-SCLY readthrough (NMD candidate)	uc002vxm.4;uc002vxk.3;uc010znn.2;uc010zno.2;uc010znp.2;uc031rrw.1;uc031rrx.1;uc031rry.1;uc031rrz.1	100533179;140739;140739;140739;140739;140739;140739;140739;140739	-1336;-1336;-1336;-1336;-1336;-1336;-1336;-1336;-3184
chr2	238872096	238874251	2156	*	Promoter (1-2kb)	2	238875587	239008054	132468	1	100533179	uc002vxm.4	-1336	ENSG00000258984	UBE2F-SCLY	UBE2F-SCLY readthrough (NMD candidate)	uc002vxm.4;uc002vxk.3;uc010znn.2;uc010zno.2;uc010znp.2;uc031rrw.1;uc031rrx.1;uc031rry.1;uc031rrz.1	100533179;140739;140739;140739;140739;140739;140739;140739;140739	-1336;-1336;-1336;-1336;-1336;-1336;-1336;-1336;-3184
chr2	240216153	240216878	726	*	Intron (uc002vyk.4/9759, intron 2 of 26)	2	240011372	240220334	208963	2	9759	uc010fyz.1	3456	ENSG00000068024	HDAC4	histone deacetylase 4	uc021vza.1;uc002vyk.4;uc010fyz.1;uc010zoa.1;uc010fza.2	100423043;9759;9759;9759;9759	-10279;0;0;0;0
chr2	241504411	241505737	1327	*	Distal Intergenic	2	241508004	241518149	10146	1	57140	uc002vzi.4	-2267	ENSG00000142327	RNPEPL1	arginyl aminopeptidase like 1	uc010zoh.2;uc002vzk.2;uc002vzl.2;uc002vzm.2;uc002vzn.2;uc002vzo.2;uc002vzp.2;uc010fzg.2;uc002vzq.2;uc002vzg.3;uc002vzh.3;uc010fzh.2;uc010fzi.2;uc002vyz.1;uc002vza.1;uc002vzb.1;uc002vzc.1;uc010fzd.1;uc002vzd.1;uc002vze.3;uc010fze.2;uc002vzf.3;uc002vzi.4;uc002vzj.3	11132;11132;11132;11132;11132;11132;11132;11132;11132;285193;285193;2859;2859;51281;51281;51281;51281;51281;51281;51281;51281;51281;57140;57140	-20396;-20396;-20396;-20396;-20396;-20396;-20396;-20396;-20396;4940;4940;-39088;-39088;-7006;-7006;-7006;-7006;-7006;-4136;-4136;-4136;-4136;-2267;-9182
chr2	243158783	243159795	1013	*	Distal Intergenic	2	243064438	243081022	16585	1	728323	uc010zph.2	94345	NA	LINC01881	long intergenic non-protein coding RNA 1881	NA	NA	NA
chr20	809393	810407	1015	*	Distal Intergenic	20	814356	826922	12567	1	83541	uc002wef.1	-3949	ENSG00000125898	FAM110A	family with sequence similarity 110 member A	uc002wei.3;uc010zpn.2;uc002wef.1;uc002weg.1;uc002weh.1	51378;51378;83541;83541;83541	86553;86553;-3949;-6304;-14878
chr20	3732631	3733318	688	*	3' UTR	20	3734146	3748452	14307	2	54976	uc002wjh.2	15134	ENSG00000101220	ADISSP	adipose secreted signaling protein	uc002wjk.3;uc002wjd.3;uc002wje.3;uc010zqi.2;uc010zqj.2;uc002wjj.3;uc002wjh.2;uc002wji.2;uc031rsi.1;uc031rsj.1;uc002wjf.1;uc002wiz.4;uc002wja.3;uc002wjc.3;uc010zqk.2;uc010zql.2;uc010zqm.2;uc002wjl.3;uc002wjm.3;uc021waa.1;uc002wjn.3;uc002wjo.3;uc002wjp.3;uc002wjq.3	1059;116835;116835;116835;116835;25876;54976;54976;54976;54976;54976;6614;6614;6614;994;994;994;994;994;994;994;994;994;994	34019;0;0;0;0;28784;15134;15134;15134;15717;15134;-44856;-44856;-45278;-34260;-34260;-34260;-43068;-43068;-43068;-43083;-43083;-43083;-47399
chr20	3890409	3891331	923	*	5' UTR	20	3898141	3898218	78	1	406896	uc002wkg.3	-6810	ENSG00000199024	MIR103A2	microRNA 103a-2	uc021wac.1;uc002wkh.2;uc002wki.2;uc002wkj.2;uc002wkg.3;uc002wjw.4;uc002wjx.4;uc002wjy.4;uc002wkb.3;uc010gbd.1;uc002wkc.3;uc002wkd.3;uc002wke.3;uc002wkf.3	100302282;11237;11237;11237;406896;57506;57506;57506;80025;80025;80025;80025;80025;80025	6879;104723;104885;104885;-6810;62963;62963;62963;0;0;0;0;0;0
chr20	23113254	23114862	1609	*	Promoter (<=1kb)	20	23105705	23113273	7569	2	200261	uc021wbi.1	0	ENSG00000233746	LINC00656	long intergenic non-protein coding RNA 656	uc021wbi.1;uc002wsv.3	200261;22918	0;-46277
chr20	23174167	23175214	1048	*	Distal Intergenic	20	23105705	23113273	7569	2	200261	uc021wbi.1	-60894	ENSG00000233746	LINC00656	long intergenic non-protein coding RNA 656	NA	NA	NA
chr20	30194988	30195675	688	*	Promoter (<=1kb)	20	30194989	30195043	55	1	100422904	uc021wbt.1	0	ENSG00000264395	MIR3193	microRNA 3193	uc021wbt.1;uc031rsr.1;uc002wwg.2;uc002wwh.2;uc002wwc.3;uc002wwd.3;uc002wwe.3;uc002wwj.1	100422904;100874042;3397;3397;81502;81502;81502;84701	0;-33922;1902;1902;92747;92747;92747;-30016
chr20	30262898	30264491	1594	*	Intron (uc002wwk.3/598, intron 1 of 2)	20	30225691	30232800	7110	1	84701	uc002wwj.1	37207	ENSG00000131055	COX4I2	cytochrome c oxidase subunit 4I2	uc002wwk.3;uc002wwl.3;uc002wwm.3;uc002wwn.3;uc002wwj.1	598;598;598;598;84701	0;0;0;0;37207
chr20	31168591	31169357	767	*	Intron (uc031rss.1/140688, intron 1 of 10)	20	31030862	31172875	142014	2	140688	uc031rss.1	3518	ENSG00000197183	NOL4L	nucleolar protein 4 like	uc031rss.1;uc002wxw.1;uc002wxx.3;uc002wxy.3	140688;140688;140688;149950	0;-44391;0;-5924
chr20	31229764	31230723	960	*	Intron (uc021wbx.1/284805, intron 3 of 4)	20	31219427	31239783	20357	2	284805	uc021wbx.1	9060	ENSG00000198547	C20orf203	chromosome 20 open reading frame 203	uc002wxy.3;uc021wbx.1;uc002wxz.3	149950;284805;284805	54483;0;0
chr20	32277636	32278477	842	*	Distal Intergenic	20	32263292	32274210	10919	2	1869	uc002wzu.4	-3426	ENSG00000101412	E2F1	E2F transcription factor 1	uc002wzv.3;uc002wzw.3;uc010zuh.2;uc002wzs.2;uc002wzt.3;uc002wzu.4;uc002wzl.3;uc002wzm.4;uc002wzn.4;uc002wzo.5;uc002wzx.3;uc002wzy.3;uc010geq.3;uc010ger.3;uc010zug.1;uc002wze.1;uc002wzf.1;uc002wzg.1;uc002wzh.1;uc002wzi.1;uc002wzj.1;uc002wzk.1	11264;11264;11264;128864;170487;1869;63941;63941;63941;63941;84905;84905;84905;84905;9139;9139;9139;9139;9139;9139;9139;9139	29659;29659;29659;27544;23332;-3426;-27052;-15372;-15372;-15372;0;0;0;0;199708;199708;127465;127465;127465;115856;89505;51089
chr20	32319537	32320224	688	*	Promoter (<=1kb)	20	32319808	32380075	60268	1	84905	uc002wzx.3	0	ENSG00000131061	ZNF341	zinc finger protein 341	uc002wzv.3;uc002wzw.3;uc010zuh.2;uc002wzu.4;uc002wzx.3;uc002wzy.3;uc010geq.3;uc010ger.3	11264;11264;11264;1869;84905;84905;84905;84905	-11401;-11401;-11401;-45327;0;0;0;0
chr20	34050086	34050924	839	*	5' UTR	20	34047803	34099803	52001	1	11190	uc010zve.2	2283	ENSG00000126001	CEP250	centrosomal protein 250	uc021wcn.1;uc010gfe.1;uc010zvd.2;uc021wco.1;uc010zve.2;uc002xco.3;uc010gfc.1;uc002xck.1	11190;11190;11190;11190;11190;11190;8200;8200	0;0;0;0;0;-3867;-24137;-24059
chr20	34101919	34102943	1025	*	Distal Intergenic	20	34108570	34117481	8912	2	140873	uc010gff.3	14538	ENSG00000125975	C20orf173	chromosome 20 open reading frame 173	uc021wcn.1;uc010gfe.1;uc010zvd.2;uc021wco.1;uc010zve.2;uc002xco.3;uc010gff.3;uc002xcp.2;uc010zvf.1;uc002xcq.1;uc002xcr.1;uc010zvg.2;uc002xcs.3;uc002xct.3	11190;11190;11190;11190;11190;11190;140873;140873;140873;51614;51614;51614;51614;51614	0;0;0;0;0;47128;14538;14538;14538;-26835;-26835;-26835;-26835;-26835
chr20	36787978	36789336	1359	*	Intron (uc002xhr.3/7052, intron 2 of 12)	20	36756864	36793700	36837	2	7052	uc002xhr.3	4364	ENSG00000198959	TGM2	transglutaminase 2	uc002xhq.3;uc002xhr.3;uc010zvx.2;uc010zvy.2;uc002xhs.1;uc002xht.3;uc002xhu.3;uc002xhv.1;uc002xhw.1;uc002xhx.1;uc002xhy.1	7052;7052;7052;7052;7052;7052;7052;85449;85449;85449;85449	-25816;0;0;0;0;0;0;57249;57249;62210;99838
chr20	37294818	37295618	801	*	Distal Intergenic	20	37353105	37358015	4911	1	140679	uc002xjc.3	-57487	ENSG00000101438	SLC32A1	solute carrier family 32 member 1	uc021wdn.1	343578	64241
chr20	39890192	39891572	1381	*	Intron (uc002xjr.1/23051, intron 2 of 4)	20	39807089	39900896	93808	2	23051	uc002xjr.1	9324	ENSG00000174306	ZHX3	zinc fingers and homeoboxes 3	uc002xjr.1;uc002xjs.1;uc002xjt.1;uc002xju.1;uc002xjv.1;uc002xjw.1	23051;23051;23051;23051;23051;23051	0;0;0;0;0;0
chr20	43172668	43173508	841	*	Intron (uc002xmg.3/11142, intron 1 of 5)	20	43160436	43247678	87243	1	11142	uc002xmi.3	12232	ENSG00000168734	PKIG	cAMP-dependent protein kinase inhibitor gamma	uc002xme.3;uc002xmf.1;uc010ggs.1;uc010zwp.1;uc002xmg.3;uc002xmh.3;uc002xmi.3;uc002xmc.2;uc002xmd.2;uc031rtp.1;uc010ggr.1	10955;10955;10955;10955;11142;11142;11142;79183;79183;79183;79183	-21942;-21942;-21942;-21942;0;0;0;68142;68142;68142;64059
chr20	44047720	44049192	1473	*	Promoter (<=1kb)	20	44048546	44054885	6340	1	51604	uc010zxb.2	0	ENSG00000124155	PIGT	phosphatidylinositol glycan anchor biosynthesis class T	uc002xoo.3;uc002xop.3;uc002xoq.3;uc002xny.3;uc010ghb.2;uc010zwt.2;uc010ghc.2;uc010ghd.2;uc010ghe.2;uc010ghf.2;uc002xoh.3;uc002xoi.3;uc002xoj.3;uc010zwu.3;uc010zwv.3;uc010zww.3;uc010zwx.3;uc010zwy.3;uc010zwz.3;uc010zxa.3;uc002xol.2;uc010zxb.2;uc021wei.1;uc002xnz.3;uc002xoa.3;uc021wej.1;uc002xob.3;uc002xoc.3;uc002xod.3;uc002xof.3;uc002xog.3;uc002xnx.3;uc021weh.1;uc002xnv.3;uc002xnw.2;uc010gha.3	10406;10406;10406;27296;51604;51604;51604;51604;51604;51604;51604;51604;51604;51604;51604;51604;51604;51604;51604;51604;51604;51604;55861;55861;55861;55861;55861;55861;55861;55861;55861;767557;90196;90196;90196;90196	-49202;-49202;-49202;-40763;0;0;0;0;0;0;0;0;0;0;0;0;0;0;0;0;0;0;13087;13065;13065;12899;12859;12492;12492;11091;11091;55911;57143;55980;55980;55911
chr20	44513325	44514036	712	*	3' UTR	20	44515130	44516238	1109	2	128497	uc002xqf.3	2202	ENSG00000149634	SPATA25	spermatogenesis associated 25	uc002xqa.2;uc002xqc.2;uc010zxe.2;uc010zxf.2;uc002xqf.3;uc002xqg.2;uc002xqd.3;uc010zxg.2;uc002xql.2;uc002xqm.2;uc002xqn.2;uc002xqo.2;uc002xqq.2;uc010zxj.2;uc002xqh.3;uc002xqi.3;uc002xqj.4;uc010zxi.2;uc002xqs.3;uc002xps.1;uc002xpt.1;uc002xpu.1;uc002xpv.1;uc002xpw.1;uc010zxd.1;uc002xpy.1;uc010ghi.3	10005;10005;10005;10005;128497;140825;140831;140831;5360;5360;5360;5360;5360;5360;5476;5476;5476;5476;63935;90203;90203;90203;90203;90203;90203;90203;90204	-27277;-27277;-27277;-27277;2202;5890;27105;27105;25597;26650;26967;26967;26967;26967;-5555;-5555;-5555;-5555;-49281;50855;50855;50855;50855;50855;50518;50109;0
chr20	45989126	45990058	933	*	Distal Intergenic	20	45926888	45985474	58587	2	23613	uc002xth.3	-3652	ENSG00000101040	ZMYND8	zinc finger MYND-type containing 8	uc010zyb.2;uc002xst.1;uc002xsu.1;uc002xsv.1;uc002xsw.1;uc002xsx.1;uc002xsy.1;uc010ghr.1;uc002xsz.1;uc002xta.1;uc010zxy.1;uc002xss.2;uc002xtb.1;uc002xtc.1;uc002xtd.1;uc002xte.1;uc002xtf.1;uc010zxz.1;uc010zya.1;uc002xtg.3;uc010ghs.2;uc002xth.3	100131496;23613;23613;23613;23613;23613;23613;23613;23613;23613;23613;23613;23613;23613;23613;23613;23613;23613;23613;23613;23613;23613	41880;-12456;-12456;-12456;-12456;-12456;-12456;-12456;-7858;-4725;-3886;-3652;-3652;-3652;-3652;-3652;-3652;-3652;-3652;-41321;-12267;-3652
chr20	49307398	49308457	1060	*	Promoter (<=1kb)	20	49202647	49307916	105270	2	140876	uc010zyt.2	0	ENSG00000042062	RIPOR3	RIPOR family member 3	uc010zyt.2;uc010zyu.1;uc002xvo.3	140876;140876;84612	0;0;-39624
chr20	51791699	51792778	1080	*	Intron (uc002xwo.3/128553, intron 1 of 2)	20	51801822	52111869	310048	1	128553	uc021wex.1	-9044	ENSG00000182463	TSHZ2	teashirt zinc finger homeobox 2	uc002xwo.3;uc021wex.1	128553;128553	0;-9044
chr20	52681404	52682804	1401	*	Intron (uc002xws.2/8537, intron 1 of 11)	20	52684947	52685024	78	2	100616225	uc021wey.1	2220	ENSG00000265595	MIR4756	microRNA 4756	uc021wey.1;uc010gim.2;uc010zzb.1;uc002xws.2;uc002xwt.2;uc010gil.1;uc010zzc.2	100616225;8537;8537;8537;8537;8537;8537	2220;-35893;-35893;0;0;0;0
chr20	54937454	54938458	1005	*	Intron (uc002xxc.3/116151, intron 1 of 2)	20	54933983	54943718	9736	1	116151	uc002xxc.3	3471	ENSG00000124098	FAM210B	family with sequence similarity 210 member B	uc002xxc.3;uc002xxl.1;uc002xxm.1;uc002xxn.1;uc002xxp.2;uc002xxq.4;uc002xxr.2;uc010gio.2;uc010zze.1;uc002xxd.1;uc002xxe.1;uc002xxf.1;uc002xxg.1;uc002xxh.1;uc002xxi.1;uc002xxj.1;uc010zzd.1	116151;1477;1477;1477;57091;57091;57091;57091;57091;6790;6790;6790;6790;6790;6790;6790;6790	0;-28969;-29116;-29249;-48710;-48856;-48856;-48856;-48856;28893;28893;28893;28893;28893;28893;28893;28893
chr20	55989905	55990837	933	*	Intron (uc021wfc.1/100616458, intron 1 of 1)	20	55966454	55984386	17933	1	55544	uc010zzk.2	23451	ENSG00000132819	RBM38	RNA binding motif protein 38	uc021wfc.1;uc010zzj.2;uc010zzk.2;uc010gis.1;uc010git.1;uc002xyg.3;uc002xyi.3	100616458;55544;55544;8480;8480;8480;8480	0;23451;23451;63760;63760;63760;63287
chr20	57595741	57596756	1016	*	Promoter (1-2kb)	20	57594309	57601709	7401	1	81027	uc002yak.3	1432	ENSG00000101162	TUBB1	tubulin beta 1 class VI	uc021wfq.1;uc021wfr.1;uc002yai.2;uc002yaj.4;uc002yam.3;uc010zzv.2;uc002yal.3;uc010zzu.2;uc002yaf.2;uc002yag.4;uc002yak.3	100533975;100533975;1522;1522;51012;51012;514;51497;51497;51497;81027	21145;21145;-13432;-13432;21145;21145;10666;39478;39478;39478;0
chr20	61062194	61063347	1154	*	Distal Intergenic	20	61038553	61051026	12474	2	140628	uc002ycx.1	-11168	ENSG00000130700	GATA5	GATA binding protein 5	uc002ycx.1	140628	-11168
chr21	16125661	16127035	1375	*	Distal Intergenic	21	15964484	16015428	50945	2	388813	uc031rux.1	-110233	NA	NA	NA	NA	NA	NA
chr21	19373008	19373797	790	*	Intron (uc002ykr.3/140578, intron 2 of 6)	21	19289537	19639687	350151	1	140578	uc021whr.1	83471	ENSG00000154645	CHODL	chondrolectin	uc002ykr.3;uc002yks.3;uc002ykt.3;uc002yku.3;uc021whr.1	140578;140578;140578;140578;140578	0;0;0;0;0
chr21	25644393	25645693	1301	*	Distal Intergenic	21	26212864	26430056	217193	1	339622	uc031rvb.1	-567171	ENSG00000226983	LINC01692	long intergenic non-protein coding RNA 1692	NA	NA	NA
chr21	33552742	33554739	1998	*	Distal Intergenic	21	33452794	33458608	5815	2	100551499	uc021wij.1	-94134	NA	LINC00159	long intergenic non-protein coding RNA 159	NA	NA	NA
chr21	33556087	33557000	914	*	Distal Intergenic	21	33640530	33651376	10847	2	54069	uc002ypi.3	94376	ENSG00000159055	MIS18A	MIS18 kinetochore protein A	NA	NA	NA
chr21	33800202	33801050	849	*	Intron (uc002ypr.1/59271, intron 1 of 7)	21	33784752	33887697	102946	1	59271	uc010glw.1	15450	ENSG00000166979	EVA1C	eva-1 homolog C	uc002ypr.1;uc002yps.1;uc010glw.1;uc002ypu.1;uc011adp.2;uc002ypn.2	59271;59271;59271;59271;84996;9875	0;0;0;-23443;34760;-34890
chr21	33919088	33919744	657	*	Distal Intergenic	21	33947151	33957845	10695	2	140290	uc002ypw.4	38101	ENSG00000242220	TCP10L	t-complex 10 like	uc002ypw.4;uc002ypx.1;uc002ypy.2;uc002ypz.2;uc002ypr.1;uc002yps.1;uc010glw.1;uc002ypu.1	140290;56683;56683;56683;59271;59271;59271;59271	38101;60282;65174;65174;0;0;0;94595
chr21	34569658	34570629	972	*	Distal Intergenic	21	34537776	34542541	4766	2	728409	uc002yra.4	-27117	NA	LINC01548	long intergenic non-protein coding RNA 1548	uc002yrb.3;uc002yrc.3;uc002yrd.3;uc002yre.3;uc002yrf.3;uc002yra.4	3455;3455;3455;3455;3455;728409	-31602;-31602;-31602;-31602;-31602;-27117
chr21	36280375	36281673	1299	*	Intron (uc010gmu.3/861, intron 2 of 8)	21	36193574	36260987	67414	2	861	uc002yuo.1	-19388	ENSG00000159216	RUNX1	RUNX family transcription factor 1	uc002yuh.3;uc010gmu.3;uc002yuj.4;uc010gmv.3;uc002yuk.4;uc002yum.1;uc002yuo.1;uc010gmw.1;uc002yur.1;uc002yut.1	861;861;861;861;861;861;861;861;861;861	-19388;0;0;0;0;0;-19388;0;-27365;0
chr21	36398428	36399741	1314	*	Intron (uc010gmu.3/861, intron 2 of 8)	21	36410233	36411723	1491	2	80215	uc011adz.2	11982	NA	RUNX1-IT1	RUNX1 intronic transcript 1	uc011adz.2;uc010gmu.3;uc002yuj.4;uc010gmv.3;uc002yuk.4;uc002yum.1;uc010gmw.1;uc002yut.1	80215;861;861;861;861;861;861;861	11982;0;0;0;0;0;0;0
chr21	40356741	40358451	1711	*	Distal Intergenic	21	40177755	40196878	19124	1	2114	uc002yxg.4	178986	ENSG00000157557	ETS2	ETS proto-oncogene 2, transcription factor	NA	NA	NA
chr21	40520615	40521527	913	*	Distal Intergenic	21	40547372	40555440	8069	2	8624	uc002yxi.4	33913	ENSG00000183527	PSMG1	proteasome assembly chaperone 1	uc010goc.1;uc002yxk.2;uc021wjf.1;uc002yxi.4;uc002yxj.4;uc010gob.4;uc031rvo.1	54014;54014;54014;8624;8624;8624;8624	115418;164185;164185;33913;33913;33913;33913
chr21	43352516	43353798	1283	*	Intron (uc002yzw.3/25966, intron 2 of 13)	21	43321062	43346799	25738	2	25966	uc002yzx.1	-5717	ENSG00000157617	C2CD2	C2 calcium dependent domain containing 2	uc002yzs.3;uc002yzt.3;uc002yzu.3;uc002yzv.3;uc002yzw.3;uc002yzx.1	25966;25966;25966;25966;25966;25966	-30658;-24164;-13374;-5717;0;-5717
chr21	43822972	43824463	1492	*	Promoter (<=1kb)	21	43823971	43867790	43820	1	53347	uc002zbe.3	0	ENSG00000160185	UBASH3A	ubiquitin associated and SH3 domain containing A	uc002zbe.3;uc002zbf.3;uc010gpc.3;uc010gpd.3;uc010gpe.3;uc002zay.2;uc002zaz.3;uc002zba.2;uc002zbb.3;uc002zbc.3;uc002zbd.4;uc002zax.1	53347;53347;53347;53347;53347;64699;64699;64699;64699;64699;64699;7031	0;0;0;0;0;-19112;-13714;-12445;-6017;-6017;-6017;-36328
chr21	43822972	43824463	1492	*	Promoter (<=1kb)	21	43823971	43867790	43820	1	53347	uc002zbe.3	0	ENSG00000160185	UBASH3A	ubiquitin associated and SH3 domain containing A	uc002zbe.3;uc002zbf.3;uc010gpc.3;uc010gpd.3;uc010gpe.3;uc002zay.2;uc002zaz.3;uc002zba.2;uc002zbb.3;uc002zbc.3;uc002zbd.4;uc002zax.1	53347;53347;53347;53347;53347;64699;64699;64699;64699;64699;64699;7031	0;0;0;0;0;-19112;-13714;-12445;-6017;-6017;-6017;-36328
chr21	43966746	43967914	1169	*	Exon (uc002zbi.3/54020, exon 10 of 21)	21	43934024	44001550	67527	1	54020	uc002zbj.3	32722	ENSG00000160190	SLC37A1	solute carrier family 37 member 1	uc002zbi.3;uc002zbj.3	54020;54020	0;0
chr21	44526721	44527988	1268	*	Promoter (<=1kb)	21	44513066	44527688	14623	2	7307	uc002zcz.1	0	ENSG00000160201	U2AF1	U2 small nuclear RNA auxiliary factor 1	uc002zcy.1;uc002zcz.1;uc002zda.1;uc002zdb.1;uc010gpi.1;uc002zdc.1;uc002zcs.1;uc002zct.2;uc002zcu.2;uc002zcv.2;uc002zcw.3	7307;7307;7307;7307;7307;7307;875;875;875;875;875	-1359;0;0;0;0;0;-38207;-30681;-30681;-30249;-30249
chr21	44526721	44527988	1268	*	Promoter (<=1kb)	21	44513066	44527688	14623	2	7307	uc002zcz.1	0	ENSG00000160201	U2AF1	U2 small nuclear RNA auxiliary factor 1	uc002zcy.1;uc002zcz.1;uc002zda.1;uc002zdb.1;uc010gpi.1;uc002zdc.1;uc002zcs.1;uc002zct.2;uc002zcu.2;uc002zcv.2;uc002zcw.3	7307;7307;7307;7307;7307;7307;875;875;875;875;875	-1359;0;0;0;0;0;-38207;-30681;-30681;-30249;-30249
chr21	45148139	45148901	763	*	Promoter (<=1kb)	21	45148781	45158742	9962	1	8566	uc002zdp.3	0	ENSG00000160209	PDXK	pyridoxal kinase	uc002zdr.4;uc002zdk.3;uc002zdl.3;uc002zdm.4;uc002zdn.4;uc002zdp.3	1476;23076;23076;8566;8566;8566	47355;68707;42126;0;0;0
chr21	45274925	45275659	735	*	Distal Intergenic	21	45285116	45407475	122360	1	56894	uc002zdv.3	-9457	ENSG00000160216	AGPAT3	1-acylglycerol-3-phosphate O-acyltransferase 3	uc002zdt.2;uc010gpn.2;uc002zdu.2;uc002zdv.3	284837;284837;284837;56894	-44683;-44683;-42477;-9457
chr21	46013517	46014484	968	*	Promoter (1-2kb)	21	46011149	46012386	1238	2	386674	uc002zfm.3	-1131	ENSG00000188155	KRTAP10-6	keratin associated protein 10-6	uc002zfq.3;uc002zfk.1;uc002zfm.3;uc002zfn.4;uc002zfp.4;uc002zfi.1;uc002zfl.1;uc002zfo.1;uc002zfj.1;uc002zfe.1;uc010gpv.1	353333;386672;386674;386675;386676;386679;386680;386681;386682;54084;54084	-42789;19911;-1131;-6013;-32556;-42129;-13036;-17512;-34874;0;0
chr21	46273495	46275531	2037	*	Exon (uc002zgb.2/754, exon 5 of 6)	21	46269500	46293818	24319	2	754	uc002zgb.2	18287	ENSG00000183255	PTTG1IP	PTTG1 interacting protein	uc002zgd.2;uc002zgf.3;uc010gpw.2;uc011afl.1;uc002zgg.2;uc002zfz.1;uc011afi.1;uc002zgb.2;uc011afk.2	3689;3689;3689;3689;3689;6612;6612;754;754	55210;65434;65434;65434;73222;-35451;-35451;0;0
chr21	46831112	46832137	1026	*	Promoter (1-2kb)	21	46827301	46829980	2680	2	100874236	uc031rwa.1	-1132	ENSG00000224574	COL18A1-AS2	COL18A1 antisense RNA 2	uc031rwa.1;uc011afr.1;uc002zhh.1;uc002zhg.3;uc002zhi.3	100874236;378832;378832;80781;80781	-1132;12818;12848;0;-43287
chr21	47573164	47573859	696	*	Promoter (1-2kb)	21	47556176	47575481	19306	2	10841	uc002zif.3	1622	ENSG00000160282	FTCD	formimidoyltransferase cyclodeaminase	uc002zie.3;uc002zif.3;uc002zig.3;uc002zih.3;uc010gqf.3;uc010gqg.1;uc002zhy.1;uc002zhz.1;uc002zia.1;uc002zij.3;uc002zik.2;uc002zil.2;uc011afv.1;uc002zii.3;uc011afu.2;uc031rwb.1	10841;10841;10841;10841;10841;10841;1292;1292;1292;4047;4047;4047;4047;84221;84221;84221	-10509;0;0;0;0;0;55131;55131;55131;74879;74879;74879;74879;0;0;0
chr21	47603281	47603972	692	*	Promoter (<=1kb)	21	47581062	47604373	23312	2	84221	uc002zii.3	401	ENSG00000160284	SPATC1L	spermatogenesis and centriole associated 1 like	uc002zie.3;uc002zif.3;uc002zig.3;uc002zih.3;uc010gqf.3;uc010gqg.1;uc002zim.2;uc002zin.2;uc002zij.3;uc002zik.2;uc002zil.2;uc011afv.1;uc002zii.3;uc011afu.2;uc031rwb.1	10841;10841;10841;10841;10841;10841;114044;114044;4047;4047;4047;4047;84221;84221;84221	-40626;0;0;0;0;0;-45186;-45186;44766;44766;44766;44766;0;0;0
chr21	47739954	47740993	1040	*	Promoter (<=1kb)	21	47720344	47740739	20396	2	54058	uc002zja.3	0	ENSG00000160298	C21orf58	chromosome 21 open reading frame 58	uc002zji.4;uc002zjj.3;uc010gqk.1;uc002ziz.3;uc002zja.3;uc002zjc.3;uc002zjf.3;uc010gqj.2;uc002zjg.1;uc002zit.1;uc002ziu.1;uc002ziv.3;uc002ziw.3;uc002zix.3;uc002ziy.3;uc010gqh.3;uc002zir.1	5116;5116;5116;54058;54058;54058;54058;54058;54058;54059;54059;54059;54059;54059;54059;54059;8888	0;0;-13318;-1820;0;-903;0;0;0;33687;33687;33687;33687;33687;33687;33687;-34718
chr21	47813298	47813731	434	*	Intron (uc002zji.4/5116, intron 21 of 46)	21	47754311	47769734	15424	1	5116	uc010gqk.1	58987	ENSG00000160299	PCNT	pericentrin	uc002zji.4;uc002zjj.3;uc010gqk.1	5116;5116;5116	0;0;58987
chr21	47875403	47876301	899	*	Distal Intergenic	21	47878862	47966219	87358	1	23181	uc002zjl.3	-2561	ENSG00000160305	DIP2A	disco interacting protein 2 homolog A	uc031rwd.1;uc002zjl.3;uc002zjm.3;uc010gql.3;uc002zjn.3;uc011afy.1;uc002zjo.2;uc011afz.1;uc002zjp.1;uc002zji.4;uc002zjj.3	100862692;23181;23181;23181;23181;23181;23181;23181;23181;5116;5116	-6083;-2561;-2561;-2561;-2561;-2561;-2561;-2561;-47925;0;0
chr21	48111720	48113025	1306	*	Distal Intergenic	21	48063198	48081848	18651	1	3275	uc002zjz.1	48522	ENSG00000160310	PRMT2	protein arginine methyltransferase 2	uc021wkc.1;uc002zjw.3;uc002zjx.3;uc002zjy.3;uc010gqm.3;uc011aga.2;uc011agb.2;uc011agc.2;uc002zjz.1	3275;3275;3275;3275;3275;3275;3275;3275;3275	56213;56213;56213;56213;56213;56213;56213;56213;48522
chr22	18269138	18269719	582	*	Distal Intergenic	22	18270416	18274433	4018	2	57553	uc010grd.2	4714	ENSG00000243156	MICAL3	microtubule associated monooxygenase, calponin and LIM domain containing 3	uc021wkq.1;uc010grd.2;uc010gre.2;uc011agl.2;uc002zng.4;uc002znh.2;uc002znc.2;uc021wko.1;uc002znd.2;uc002zne.2;uc002znf.2;uc010gra.2;uc021wkp.1;uc010grb.1;uc010grc.1	100423025;57553;57553;57553;57553;57553;637;637;637;637;637;637;637;637;637	-22113;4714;28709;0;0;237606;-12330;-12330;-11877;-11877;-11877;-11877;-11877;-11707;-11707
chr22	18306870	18308126	1257	*	Intron (uc011agl.2/57553, intron 20 of 28)	22	18270416	18298428	28013	2	57553	uc010gre.2	-8442	ENSG00000243156	MICAL3	microtubule associated monooxygenase, calponin and LIM domain containing 3	uc010grd.2;uc010gre.2;uc011agl.2;uc002zng.4;uc002znh.2;uc002znj.1;uc002znk.1;uc002znl.1;uc002znm.3;uc010grf.3;uc002znd.2;uc002zne.2;uc002znf.2;uc010gra.2;uc021wkp.1;uc010grb.1;uc010grc.1	57553;57553;57553;57553;57553;57553;57553;57553;57553;57553;637;637;637;637;637;637;637	-32437;-8442;0;0;199199;77387;81526;176141;68544;199199;-49609;-49609;-49609;-49609;-49609;-49439;-49439
chr22	19384213	19385300	1088	*	Exon (uc002zpf.1/7290, exon 7 of 25)	22	19318224	19419219	100996	2	7290	uc002zpf.1	33919	ENSG00000100084	HIRA	histone cell cycle regulator	uc002zpi.3;uc002zpk.2;uc002zpg.3;uc002zpf.1;uc010grn.1;uc011agx.1;uc010gro.2;uc010grp.3	128977;128977;64976;7290;7290;7290;7290;7290	50455;50455;-34736;0;0;0;0;0
chr22	20012643	20013641	999	*	Intron (uc010grw.2/128989, intron 2 of 9)	22	20008633	20053447	44815	1	128989	uc011ahi.1	4010	ENSG00000183597	TANGO2	transport and golgi organization 2 homolog	uc010grw.2;uc002zrc.1;uc002zre.2;uc010grx.2;uc002zrf.2;uc002zrg.2;uc011ahe.1;uc011ahf.1;uc011ahg.1;uc011ahh.1;uc011ahi.1;uc010gry.1;uc011ahj.2;uc002zqy.3;uc002zqz.3	128989;128989;128989;128989;128989;128989;128989;128989;128989;128989;128989;128989;406961;421;421	0;0;0;0;0;0;0;0;0;0;0;-10642;-7021;-45909;-8334
chr22	23448919	23449622	704	*	Intron (uc002zwu.1/2781, intron 2 of 2)	22	23401593	23484241	82649	2	27156	uc002zwt.3	34619	ENSG00000100218	RSPH14	radial spoke head 14 homolog	uc002zwt.3;uc010gtv.1;uc002zwu.1;uc002zwv.1;uc010gtw.1	27156;27156;2781;9609;9609	0;34619;0;-37891;-37891
chr22	24026531	24027317	787	*	Intron (uc002zxh.4/91316, intron 2 of 4)	22	24032961	24041363	8403	1	266747	uc002zxn.3	-5644	ENSG00000159496	RGL4	ral guanine nucleotide dissociation stimulator like 4	uc002zxn.3;uc002zxo.3;uc002zxp.1;uc002zxq.3;uc031rxh.1;uc002zxh.4;uc002zxi.4;uc002zxk.4;uc002zxl.4;uc010gua.3;uc011aiz.2;uc002zxm.3;uc010gub.1	266747;266747;266747;266747;266747;91316;91316;91316;91316;91316;91316;91316;91316	-5644;-5644;-6176;-6176;-11371;0;0;0;0;0;0;0;32228
chr22	24906185	24907542	1358	*	Exon (uc003aae.3/51733, exon 4 of 10)	22	24915769	24922553	6785	1	51733	uc021wnh.1	-8227	ENSG00000100024	UPB1	beta-ureidopropionase 1	uc003aae.3;uc003aaf.3;uc021wnh.1;uc002zzz.2;uc003aad.1;uc003aam.1;uc011aju.2;uc003aah.2;uc003aal.2;uc003aai.4;uc003aaj.4;uc003aak.4	51733;51733;51733;646023;646023;6634;6634;83606;83606;83606;83606;83606	0;0;-8227;-15402;-15402;-44076;-44076;0;0;0;0;0
chr22	24949576	24950115	540	*	Promoter (1-2kb)	22	24936406	24951275	14870	2	83606	uc003aah.2	1160	ENSG00000138867	GUCD1	guanylyl cyclase domain containing 1	uc003aan.1;uc003aas.1;uc003aat.1;uc003aau.2;uc003aav.2;uc003aaw.2;uc003aao.2;uc003aaq.2;uc003aae.3;uc003aaf.3;uc021wnh.1;uc003aam.1;uc011aju.2;uc003aah.2;uc003aal.2;uc003aai.4;uc003aaj.4;uc003aak.4	2678;2678;2678;2678;2678;2678;388886;388886;51733;51733;51733;6634;6634;83606;83606;83606;83606;83606	-29603;-48999;-48999;-49009;-49009;-49009;35114;38920;0;0;33807;-1503;-1503;0;0;0;0;0
chr22	25098790	25099681	892	*	Distal Intergenic	22	25041133	25055114	13982	2	646074	uc003abc.2	-43676	NA	POM121L10P	POM121 transmembrane nucleoporin like 10, pseudogene	uc003abd.2;uc010gut.2;uc011ajx.2;uc011ajy.2;uc011ajv.2;uc003abc.2	440822;440822;440822;440822;644165;646074	0;0;0;0;69908;-43676
chr22	25124185	25125847	1663	*	Exon (uc003abd.2/440822, exon 15 of 21)	22	25160468	25161986	1519	1	7152	uc003abe.3	-34621	NA	TOP1P2	DNA topoisomerase I pseudogene 2	uc003abd.2;uc010gut.2;uc011ajx.2;uc011ajy.2;uc003abe.3	440822;440822;440822;440822;7152	0;0;0;0;-34621
chr22	26896250	26897036	787	*	Intron (uc003acr.2/24144, intron 7 of 13)	22	26887894	26890585	2692	2	24144	uc003acq.2	-5665	ENSG00000100109	TFIP11	tuftelin interacting protein 11	uc003acq.2;uc003acr.2;uc003acs.2;uc003act.2;uc003acp.4;uc010gve.3;uc003acw.3;uc003acx.3;uc011akf.1;uc003ach.4;uc003aci.4;uc003acj.4;uc003ack.4;uc003acl.4;uc003acn.4;uc010gvd.2;uc003aco.2	24144;24144;24144;24144;402055;402055;8459;8459;8459;89781;89781;89781;89781;89781;89781;89781;89781	-5665;0;0;0;16404;16400;64334;89053;89053;-27866;-20603;-20603;-16447;-16421;-16421;-16421;-20603
chr22	26992659	26993650	992	*	Distal Intergenic	22	26936755	26986089	49335	2	8459	uc011akf.1	-6570	ENSG00000128294	TPST2	tyrosylprotein sulfotransferase 2	uc021wnl.1;uc003acz.4;uc003acy.1;uc003acw.3;uc003acx.3;uc011akf.1	100313914;1413;1414;8459;8459;8459	-41370;-24278;20341;-31289;-6570;-6570
chr22	27027872	27029267	1396	*	Distal Intergenic	22	27017928	27026636	8709	1	1413	uc003acz.4	9944	ENSG00000196431	CRYBA4	crystallin beta A4	uc003acz.4;uc003acy.1;uc003ada.2;uc003adb.2;uc003adc.2;uc003add.2;uc003acx.3;uc011akf.1	1413;1414;440823;440823;440823;440823;8459;8459	9944;-13881;-24179;-24179;-24179;-24179;-41783;-41783
chr22	29492588	29493656	1069	*	Intron (uc003ael.3/83999, intron 2 of 8)	22	29490246	29542808	52563	1	83999	uc011akn.2	2342	ENSG00000183762	KREMEN1	kringle containing transmembrane protein 1	uc003aej.1;uc003ael.3;uc011akm.1;uc011akn.2;uc003aeg.3;uc021wnq.1	25770;83999;83999;83999;84133;84133	-34681;0;0;0;212833;179211
chr22	29588385	29589038	654	*	Distal Intergenic	22	29601901	29655586	53686	1	129080	uc003aem.4	-12863	ENSG00000186998	EMID1	EMI domain containing 1	uc003aem.4;uc003aen.4;uc021wnr.1;uc003ael.3;uc011akm.1;uc011akn.2	129080;129080;129080;83999;83999;83999	-12863;-12863;-40330;0;0;0
chr22	29591330	29592200	871	*	Distal Intergenic	22	29601901	29655586	53686	1	129080	uc003aem.4	-9701	ENSG00000186998	EMID1	EMI domain containing 1	uc003aem.4;uc003aen.4;uc021wnr.1;uc003ael.3;uc011akm.1;uc011akn.2	129080;129080;129080;83999;83999;83999	-9701;-9701;-37168;0;0;0
chr22	29704640	29705842	1203	*	Promoter (1-2kb)	22	29703048	29708774	5727	1	10634	uc003afe.1	1592	ENSG00000185340	GAS2L1	growth arrest specific 2 like 1	uc010gvn.2;uc003aff.4;uc031rxl.1;uc010gvm.1;uc003afa.1;uc003afb.1;uc003afc.1;uc003afd.1;uc003afe.1;uc003aem.4;uc003aen.4;uc021wnr.1;uc003afh.3;uc011ako.2;uc003afi.3;uc003afj.3;uc003afl.3;uc003aes.4;uc003aet.3;uc003aev.3;uc003aew.3;uc003aex.3;uc003aey.3;uc003aez.3;uc003aeq.1	100500833;10633;10633;10634;10634;10634;10634;10634;10634;129080;129080;129080;162;162;162;162;162;2130;2130;2130;2130;2130;2130;2130;25807	23414;5903;5903;0;0;0;0;0;0;102739;102739;75272;22468;40297;78730;78730;78730;40642;40642;40642;40642;40642;30621;19138;-40726
chr22	30129587	30130616	1030	*	Intron (uc003agm.3/55954, intron 6 of 6)	22	30116344	30127820	11477	1	164633	uc003agl.3	13243	ENSG00000100314	CABP7	calcium binding protein 7	uc003agl.3;uc003agp.1;uc003agq.1;uc003afy.4;uc003afz.4;uc003aga.4;uc003agb.4;uc003agc.4;uc003agd.4;uc003age.4;uc003agf.4;uc003agg.4;uc003agh.4;uc003agi.4;uc003agj.4;uc010gvp.3;uc011akq.2;uc003agm.3;uc003agn.3;uc003ago.1	164633;29796;29796;4771;4771;4771;4771;4771;4771;4771;4771;4771;4771;4771;4771;4771;4771;55954;55954;55954	13243;-32742;-32742;130042;130042;130042;130042;130042;130042;130042;130042;130042;130042;130042;130042;68608;60329;0;0;32384
chr22	30847146	30847945	800	*	Distal Intergenic	22	30855216	30868034	12819	2	266629	uc003ahy.3	20089	ENSG00000100012	SEC14L3	SEC14 like lipid binding 3	uc003ahq.3;uc003ahr.3;uc003ahs.3;uc011akx.2;uc011aky.2;uc003aht.3;uc003ahu.3;uc010gvv.3;uc003ahy.3;uc003ahz.3;uc003aia.3;uc003aib.3;uc003aid.2;uc003aie.2;uc011akz.1;uc003aif.2;uc003aic.1;uc003ahv.1;uc010gvx.1;uc010gvy.1;uc003ahw.2;uc003ahx.2	23541;23541;23541;23541;23541;23541;23541;23541;266629;266629;266629;266629;284904;284904;284904;284904;376844;51537;51537;51537;51537;51537	54216;54216;54216;54216;54216;42042;41970;41970;20089;20089;20089;20089;53753;53753;53753;53753;29798;41970;41970;41731;25535;25535
chr22	31277345	31277983	639	*	Promoter (<=1kb)	22	31277668	31303811	26144	1	23762	uc011ald.1	0	ENSG00000184792	OSBP2	oxysterol binding protein 2	uc003ajc.4;uc003ajd.3;uc003aje.1;uc011ala.1;uc010gwc.1;uc003aix.1;uc011alb.1;uc003aiy.1;uc003aiz.1;uc003aja.1;uc011alc.2;uc011ald.1;uc010gwd.1	150291;150291;22880;23762;23762;23762;23762;23762;23762;23762;23762;23762;23762	-40312;-40312;86204;0;0;186552;0;0;0;0;0;0;-5430
chr22	32022248	32023571	1324	*	Intron (uc003alk.2/23761, intron 2 of 8)	22	32014477	32026810	12334	2	23761	uc003alk.2	3239	ENSG00000241878	PISD	phosphatidylserine decarboxylase	uc003alk.2;uc011alr.1;uc003alm.4;uc003alo.2;uc003ald.2;uc003ale.4;uc003alf.4;uc003alg.4;uc003alh.4;uc011alp.3;uc011alq.3;uc010gwi.4;uc003ali.4;uc003alj.4	23761;23761;23761;253143;9814;9814;9814;9814;9814;9814;9814;9814;9814;9814	0;0;0;89706;130123;130123;130123;130123;130123;130123;130123;53204;12095;11876
chr22	32972124	32973481	1358	*	Intron (uc003amx.3/8224, intron 6 of 12)	22	32914030	32926204	12175	2	8224	uc011amc.1	-45920	ENSG00000185666	SYN3	synapsin III	uc003amx.3;uc003amy.3;uc003amz.3;uc011amc.1	8224;8224;8224;8224	0;0;0;-45920
chr22	33276707	33277792	1086	*	Intron (uc003amx.3/8224, intron 3 of 12)	22	33196802	33259028	62227	1	7078	uc003anb.3	79905	ENSG00000100234	TIMP3	TIMP metallopeptidase inhibitor 3	uc003anb.3;uc003amx.3;uc003amy.3;uc003amz.3	7078;8224;8224;8224	79905;0;0;0
chr22	36764239	36765264	1026	*	Intron (uc003apg.3/4627, intron 1 of 40)	22	36721078	36761157	40080	2	4627	uc003api.1	-3082	ENSG00000100345	MYH9	myosin heavy chain 9	uc003apg.3;uc003aph.1;uc003api.1	4627;4627;4627	0;-26391;-3082
chr22	36875612	36876724	1113	*	Promoter (<=1kb)	22	36863093	36877687	14595	2	25828	uc003apk.1	963	ENSG00000100348	TXN2	thioredoxin 2	uc003apk.1;uc003apl.1;uc003apn.4;uc003apo.4;uc003app.4;uc011amr.2;uc003apr.3;uc011ams.2;uc011amt.2	25828;25828;80020;80020;80020;8664;8664;8664;8664	0;0;25853;26366;26424;40021;48553;48553;48553
chr22	37377956	37378887	932	*	Distal Intergenic	22	37361289	37364213	2925	1	100506241	uc021woq.1	16667	ENSG00000215403	LL22NC01-81G9.3	uncharacterized protein FLJ39582-like	uc021woq.1;uc003aqa.4;uc003aqc.4;uc003aqe.3;uc003aqf.3;uc003aql.4;uc003aqm.4;uc003aqi.2;uc011amu.3;uc003aqg.4;uc003aqh.4;uc031rxn.1	100506241;1439;1439;339669;339669;4357;4357;4357;4357;7263;7263;7263	16667;68281;59878;24990;24990;-36796;-36796;-36904;-36904;36581;36607;37337
chr22	37638309	37639272	964	*	Promoter (1-2kb)	22	37621310	37640305	18996	2	5880	uc003arc.3	1033	ENSG00000128340	RAC2	Rac family small GTPase 2	uc003aqz.1;uc003ard.4;uc003are.2;uc003arf.3;uc011amw.2;uc003arc.3;uc003ara.3;uc003arb.3	114904;27128;27128;27128;27128;5880;6753;6753	-43968;-39223;-39223;-39223;-39223;0;-31699;-29956
chr22	38523232	38523707	476	*	3' UTR	22	38507502	38510194	2693	2	8398	uc003aux.1	-13038	ENSG00000184381	PLA2G6	phospholipase A2 group VI	uc003auu.3;uc003auv.3;uc003auw.3;uc003aux.1;uc003auy.1;uc003auz.1;uc003ava.1;uc003avb.2;uc010gxk.1;uc011ano.1	23539;80115;80115;8398;8398;8398;8398;8398;8398;8398	-44062;-40776;-16556;-13038;0;0;0;0;0;0
chr22	38539158	38540054	897	*	Exon (uc003auy.1/8398, exon 4 of 17)	22	38507502	38510194	2693	2	8398	uc003aux.1	-28964	ENSG00000184381	PLA2G6	phospholipase A2 group VI	uc003auw.3;uc003aux.1;uc003auy.1;uc003auz.1;uc003ava.1;uc003avb.2;uc010gxk.1;uc011ano.1	80115;8398;8398;8398;8398;8398;8398;8398	-32482;-28964;0;0;0;0;0;0
chr22	39409671	39410571	901	*	Promoter (<=1kb)	22	39410265	39414825	4561	1	27350	uc003awr.3	0	ENSG00000244509	APOBEC3C	apolipoprotein B mRNA editing enzyme catalytic subunit 3C	uc011aoc.2;uc021wpq.1;uc003awt.4;uc003awu.4;uc010gxu.3;uc003awv.3;uc011aog.1;uc003aww.3;uc003awr.3;uc021wpr.1;uc003awo.2;uc003awp.2;uc003awq.2	100913187;140564;140564;140564;140564;200316;200316;200316;27350;60489;9582;9582;9582	56144;-6547;-6547;-6547;-6547;-26102;-26102;-26102;0;-26102;31267;31267;31267
chr22	39759419	39760432	1014	*	Promoter (<=1kb)	22	39760175	39774394	14220	1	9145	uc003axs.4	0	ENSG00000100321	SYNGR1	synaptogyrin 1	uc003axr.3;uc003axt.3;uc011aok.2;uc003axu.1;uc003axn.1;uc003axh.3;uc003axi.3;uc003axj.3;uc011aoj.1;uc003axo.4;uc003axq.4;uc003axs.4	10454;10454;10454;10454;26807;6122;6122;6122;6122;9145;9145;9145	0;-35327;-35327;-35327;-44301;-43749;-43749;-43028;-43749;0;0;0
chr22	39868717	39869736	1020	*	Intron (uc003axv.4/4248, intron 1 of 1)	22	39883229	39888199	4971	1	4248	uc010gxy.3	-13493	ENSG00000128268	MGAT3	beta-1,4-mannosyl-glycoprotein 4-beta-N-acetylglucosaminyltransferase	uc021wpx.1;uc003axr.3;uc003axt.3;uc011aok.2;uc003axu.1;uc003axv.4;uc010gxy.3;uc011aol.1;uc003axz.3;uc003aya.3;uc003axw.3;uc010gxz.1;uc003axx.3;uc003axy.3	100506472;10454;10454;10454;10454;4248;4248;468;468;468;54471;54471;54471;54471	40552;0;72958;72958;72958;0;-13493;-46833;-46833;-46833;-26369;-28548;-28548;-28548
chr22	40021571	40023015	1445	*	Intron (uc003ayc.3/8911, intron 4 of 36)	22	39994156	40081215	87060	1	8911	uc003ayf.3	27415	ENSG00000100346	CACNA1I	calcium voltage-gated channel subunit alpha1 I	uc003ayc.3;uc003ayd.3;uc003aye.3;uc003ayf.3	8911;8911;8911;8911	0;0;0;0
chr22	41351320	41352341	1022	*	Exon (uc011aoy.1/63929, exon 12 of 14)	22	41347351	41369019	21669	1	9978	uc003azk.3	3969	ENSG00000100387	RBX1	ring-box 1	uc011aox.2;uc003azh.3;uc003azi.3;uc011aoy.1;uc003azk.3	63929;63929;63929;63929;9978	98235;98235;98235;0;0
chr22	43136329	43137175	847	*	Distal Intergenic	22	43088127	43117286	29160	2	53947	uc010gzd.3	-19043	ENSG00000128274	A4GALT	alpha 1,4-galactosyltransferase (P1PK blood group)	uc003bdb.3;uc021wqo.1;uc021wqp.1;uc010gzd.3;uc021wqr.1	53947;53947;53947;53947;53947	-19453;-19453;-19453;-19043;-19453
chr22	43150522	43151141	620	*	Distal Intergenic	22	43088127	43117286	29160	2	53947	uc010gzd.3	-33236	ENSG00000128274	A4GALT	alpha 1,4-galactosyltransferase (P1PK blood group)	uc003bdd.2;uc010gzf.2;uc003bdb.3;uc021wqo.1;uc021wqp.1;uc010gzd.3;uc021wqr.1	26286;26286;53947;53947;53947;53947;53947	102267;102267;-33646;-33646;-33646;-33236;-33646
chr22	43403453	43404120	668	*	Intron (uc003bdg.4/11252, intron 1 of 10)	22	43265772	43411184	145413	2	11252	uc003bdg.4	7064	ENSG00000100266	PACSIN2	protein kinase C and casein kinase substrate in neurons 2	uc003bdf.4;uc003bdg.4;uc010gzh.3;uc021wqt.1;uc003bdi.3;uc003bdj.3	11252;11252;25809;25809;25809;25809	-47566;0;67476;71872;81314;81314
chr22	43499837	43500637	801	*	Distal Intergenic	22	43506754	43525718	18965	1	638	uc003bdk.3	-6117	ENSG00000100290	BIK	BCL2 interacting killer	uc010gzh.3;uc021wqt.1;uc003bdi.3;uc003bdj.3;uc003bdl.1;uc003bdm.1;uc031rxv.1;uc003bdk.3;uc003bdn.4;uc003bdo.4;uc031rxw.1;uc031rxx.1	25809;25809;25809;25809;27349;27349;27349;638;706;706;706;706	-28241;-23845;-14403;-14403;38766;38766;38766;-6117;-46883;-46883;-47302;-47304
chr22	44442072	44443221	1150	*	Intron (uc003bem.3/29780, intron 2 of 13)	22	44422184	44565112	142929	1	29780	uc010gzn.3	19888	ENSG00000188677	PARVB	parvin beta	uc003bej.3;uc011aqd.2;uc003bek.3;uc003bem.3;uc003ben.3;uc010gzn.3;uc003beo.3	25813;25813;25813;29780;29780;29780;29780	90811;90811;71597;0;0;0;-21776
chr22	45709716	45711119	1404	*	Intron (uc003bfz.4/55007, intron 2 of 9)	22	45705785	45737836	32052	1	55007	uc003bga.4	3931	ENSG00000100376	FAM118A	family with sequence similarity 118 member A	uc003bgc.3;uc003bgd.3;uc003bfz.4;uc003bga.4;uc011aqr.2;uc003bfy.3;uc010gzy.3	27127;27127;55007;55007;55007;7380;7380	98381;98381;0;0;-14406;28848;28848
chr22	46589635	46590489	855	*	Intron (uc003bgw.1/5465, intron 3 of 8)	22	46594242	46639653	45412	1	5465	uc010hac.1	-3753	ENSG00000186951	PPARA	peroxisome proliferator activated receptor alpha	uc003bhe.3;uc003bhf.3;uc003bgw.1;uc003bgx.1;uc010hab.1;uc003bgy.1;uc003bgz.1;uc003bha.3;uc003bhb.1;uc010hac.1	150383;150383;5465;5465;5465;5465;5465;5465;5465;5465	55704;55704;0;0;0;0;0;0;0;0
chr22	46636896	46637886	991	*	3' UTR	22	46639910	46646193	6284	2	150383	uc003bhe.3	8307	ENSG00000205643	CDPF1	cysteine rich DPF motif domain containing 1	uc003bhh.3;uc003bhe.3;uc003bhf.3;uc003bgw.1;uc003bgx.1;uc010hab.1;uc003bgy.1;uc003bgz.1;uc003bha.3;uc003bhb.1;uc010hac.1;uc003bhi.3;uc011aqx.2	10343;150383;150383;5465;5465;5465;5465;5465;5465;5465;5465;55020;55020	21333;8307;8307;0;0;0;0;0;0;0;0;-25975;-25975
chr22	46851414	46852635	1222	*	Intron (uc003bhw.1/9620, intron 2 of 34)	22	46764756	46805171	40416	2	9620	uc011arc.1	-46243	ENSG00000075275	CELSR1	cadherin EGF LAG seven-pass G-type receptor 1	uc003bhw.1;uc011arc.1	9620;9620	0;-46243
chr22	47486823	47487689	867	*	Intron (uc003bib.3/25771, intron 11 of 12)	22	47169824	47571342	401519	1	25771	uc003bif.3	316999	ENSG00000054611	TBC1D22A	TBC1 domain family member 22A	uc003bib.3;uc003bie.3;uc010haf.3;uc010hag.3;uc003bif.3	25771;25771;25771;25771;25771	0;0;0;0;0
chr22	50523957	50524675	719	*	Promoter (<=1kb)	22	50497820	50524358	26539	2	23209	uc003bjh.1	0	ENSG00000100427	MLC1	modulator of VRAC current 1	uc003bjg.1;uc011arl.1;uc003bjh.1;uc011arm.1;uc011arn.1;uc011aro.1;uc003bjj.3;uc003bjk.4;uc010han.3;uc011arp.2;uc011arq.1;uc010hao.1	23209;23209;23209;23209;23209;23209;54456;54456;54456;54456;54456;54456	-176;-176;0;0;0;0;-3760;-3760;-4010;-4010;-27362;-28135
chr22	51238129	51239989	1861	*	Downstream (<=300bp)	22	51222225	51238065	15841	1	284942	uc010hbj.3	15904	ENSG00000291064	RPL23AP82	ribosomal protein L23a pseudogene 82	uc011ase.1;uc003bnk.1;uc003bnl.1;uc003bnm.1;uc003bnn.1;uc003bno.1;uc011asf.1;uc011asg.1;uc011asd.2;uc003bni.3;uc003bns.3;uc003bnq.1;uc003bnr.1;uc010hbj.3	11158;11158;11158;11158;11158;11158;11158;11158;284942;284942;284942;284942;284942;284942	-17354;-16042;-16042;-16042;-16042;-16042;-16042;-16042;42615;42615;15972;15904;15904;15904
chr3	5030906	5031388	483	*	Distal Intergenic	3	4939914	5021646	81733	2	100507582	uc010hce.2	-9260	ENSG00000235831	BHLHE40-AS1	BHLHE40 antisense RNA 1	uc003bqe.1;uc010hce.2;uc003bqf.3;uc011asw.2	100507582;100507582;8553;8553	-9260;-9260;9809;9809
chr3	12994534	12995344	811	*	Intron (uc003bxt.3/9922, intron 1 of 13)	3	12938542	13008960	70419	2	9922	uc003bxt.3	13616	ENSG00000144711	IQSEC1	IQ motif and Sec7 domain ArfGEF 1	uc003bxt.3;uc003bxu.4;uc011auw.2	9922;9922;9922	0;0;0
chr3	12996572	12997747	1176	*	Intron (uc003bxt.3/9922, intron 1 of 13)	3	12938542	13008960	70419	2	9922	uc003bxt.3	11213	ENSG00000144711	IQSEC1	IQ motif and Sec7 domain ArfGEF 1	uc003bxt.3;uc003bxu.4;uc011auw.2	9922;9922;9922	0;0;0
chr3	13048931	13049499	569	*	Intron (uc011auw.2/9922, intron 1 of 14)	3	12938542	13028536	89995	2	9922	uc003bxu.4	-20395	ENSG00000144711	IQSEC1	IQ motif and Sec7 domain ArfGEF 1	uc003bxt.3;uc003bxu.4;uc011auw.2	9922;9922;9922	0;0;0
chr3	13059654	13060192	539	*	Intron (uc011auw.2/9922, intron 1 of 14)	3	12938542	13028536	89995	2	9922	uc003bxu.4	-31118	ENSG00000144711	IQSEC1	IQ motif and Sec7 domain ArfGEF 1	uc003bxu.4;uc011auw.2	9922;9922	0;0
chr3	13616290	13617439	1150	*	Intron (uc011auz.2/2199, intron 2 of 16)	3	13610240	13679922	69683	1	2199	uc011avc.2	6050	ENSG00000163520	FBLN2	fibulin 2	uc011auz.2;uc011ava.2;uc011avb.2;uc011avc.2	2199;2199;2199;2199	0;0;0;0
chr3	15093808	15094904	1097	*	3' UTR	3	15090019	15106816	16798	2	64432	uc003bzl.3	11912	ENSG00000131368	MRPS25	mitochondrial ribosomal protein S25	uc003bzm.1;uc010hek.1;uc011avn.1;uc003bzl.3;uc011avl.2;uc011avm.1;uc003bzi.3;uc003bzj.4	64145;64145;64145;64432;64432;64432;7182;7182	45751;45751;45751;0;0;0;104572;104572
chr3	16379247	16380022	776	*	Intron (uc010hes.3/23180, intron 6 of 8)	3	16310633	16378868	68236	1	92106	uc011awb.2	68614	ENSG00000154814	OXNAD1	oxidoreductase NAD binding domain containing 1	uc010hes.3;uc003cay.3;uc010her.2;uc003caw.3;uc003cax.3;uc011awb.2	23180;23180;92106;92106;92106;92106	0;0;72580;72580;72580;68614
chr3	20106505	20107274	770	*	Intron (uc003cbq.3/8850, intron 1 of 17)	3	20081524	20195896	114373	1	8850	uc003cbq.3	24981	ENSG00000114166	KAT2B	lysine acetyltransferase 2B	uc003cbq.3	8850	0
chr3	37270918	37271766	849	*	Distal Intergenic	3	37284682	37330782	46101	1	2803	uc003cgu.2	-12916	ENSG00000144674	GOLGA4	golgin A4	uc003cgu.2;uc010hgr.2;uc003cgv.3;uc003cgw.3;uc010hgs.3	2803;2803;2803;2803;2803	-12916;-12916;-12916;-12916;-12916
chr3	43811846	43812808	963	*	Distal Intergenic	3	43732375	43764217	31843	1	51099	uc003cmx.3	79471	ENSG00000011198	ABHD5	abhydrolase domain containing 5, lysophosphatidic acid acyltransferase	uc003cmx.3	51099	79471
chr3	44481127	44481923	797	*	3' UTR	3	44481262	44497188	15927	2	353274	uc011azv.1	15265	ENSG00000185219	ZNF445	zinc finger protein 445	uc010him.3;uc003cnd.4;uc003cne.4;uc011azv.1;uc003cnf.2;uc011azw.1	285343;285343;285343;353274;353274;353274	101516;101183;101183;0;0;0
chr3	45615375	45616287	913	*	Distal Intergenic	3	45636323	45722755	86433	1	8994	uc003coq.3	-20036	ENSG00000144791	LIMD1	LIM domain containing 1	uc003cop.1;uc010hit.1;uc003coq.3	23395;23395;8994	185300;185300;-20036
chr3	46474263	46475659	1397	*	Distal Intergenic	3	46449074	46451014	1941	1	9034	uc010hjf.3	25189	ENSG00000121797	CCRL2	C-C motif chemokine receptor like 2	uc003fzr.3;uc003cpq.3;uc010hjh.3;uc003cpr.3;uc003cpp.4;uc010hjg.3;uc010hjf.3	4057;4057;4057;4057;9034;9034;9034	29502;30939;30939;51065;25542;25214;25189
chr3	46550232	46551631	1400	*	Distal Intergenic	3	46539485	46542439	2955	1	83597	uc003cps.1	10747	ENSG00000163825	RTP3	receptor transporter protein 3	uc003fzr.3;uc003cpq.3;uc010hjh.3;uc003cpr.3;uc010hji.3;uc003cpu.4;uc003cps.1;uc031rzg.1	4057;4057;4057;4057;79442;79442;83597;83598	-45071;-43634;-43634;-23508;56409;69941;10747;-47257
chr3	49208562	49209107	546	*	Promoter (<=1kb)	3	49209018	49213919	4902	1	200942	uc003cwh.3	0	ENSG00000185909	KLHDC8B	kelch domain containing 8B	uc003cwh.3;uc003cwi.1;uc010hkr.3;uc003cwk.2;uc010hkt.3;uc003cwl.4;uc011bck.1;uc003cwe.3;uc003cwf.1;uc021wxt.1;uc003cwg.4	200942;200942;22973;339834;339834;339834;339834;3913;3913;646498;64925	0;-2565;-16728;0;0;0;0;-37963;-38011;20184;-4777
chr3	49275796	49276592	797	*	Intron (uc003cwk.2/339834, intron 5 of 9)	3	49311553	49311619	67	1	100422952	uc021wxu.1	-34961	ENSG00000264633	MIR4271	microRNA 4271	uc021wxu.1;uc003cwk.2;uc010hkt.3;uc003cwl.4;uc011bck.1;uc003cwm.2;uc003cwn.2;uc021wxt.1;uc003cwp.2;uc003cwq.2;uc003cwr.2	100422952;339834;339834;339834;339834;375341;375341;646498;7375;7375;7375	-34961;0;0;0;0;35375;37916;-46505;73704;100944;100944
chr3	49726118	49727821	1704	*	Promoter (<=1kb)	3	49721380	49726196	4817	2	4485	uc003cxg.3	0	ENSG00000173531	MST1	macrophage stimulating 1	uc003cxk.1;uc003cxl.1;uc010hkw.1;uc003cxf.3;uc003cxj.3;uc003cxg.3;uc011bcs.1;uc010hkx.2;uc011bct.1;uc011bcu.1;uc003cxh.4;uc010hky.1;uc003cxi.3;uc003cxe.4;uc021wyl.1;uc003cxm.1;uc003cxn.1;uc031rzt.1	29925;29925;327;327;386724;4485;4485;4485;4485;4485;63891;63891;63891;8927;9807;9807;9807;9807	33563;33563;14683;14683;29417;0;0;0;0;0;0;-9080;-9080;134196;95806;96152;96152;96154
chr3	49726118	49727821	1704	*	Promoter (<=1kb)	3	49721380	49726196	4817	2	4485	uc003cxg.3	0	ENSG00000173531	MST1	macrophage stimulating 1	uc003cxk.1;uc003cxl.1;uc010hkw.1;uc003cxf.3;uc003cxj.3;uc003cxg.3;uc011bcs.1;uc010hkx.2;uc011bct.1;uc011bcu.1;uc003cxh.4;uc010hky.1;uc003cxi.3;uc003cxe.4;uc021wyl.1;uc003cxm.1;uc003cxn.1;uc031rzt.1	29925;29925;327;327;386724;4485;4485;4485;4485;4485;63891;63891;63891;8927;9807;9807;9807;9807	33563;33563;14683;14683;29417;0;0;0;0;0;0;-9080;-9080;134196;95806;96152;96152;96154
chr3	50637957	50638847	891	*	Distal Intergenic	3	50643885	50649262	5378	2	1154	uc003dax.3	10415	ENSG00000114737	CISH	cytokine inducible SH2 containing protein	uc003dax.3;uc010hlq.3;uc003dar.3;uc003das.3;uc010hlo.3;uc010hlp.3;uc011bdr.3;uc003dat.3;uc003dau.3;uc003dav.3;uc003day.2;uc003daz.2;uc003dba.2;uc010hlr.2	1154;1154;51161;51161;51161;51161;51161;51161;51409;51409;7867;7867;7867;7867	0;0;-32734;-32734;-32734;-32734;-32734;-29499;31374;31048;0;-15715;-15715;-16085
chr3	50649136	50650630	1495	*	Promoter (<=1kb)	3	50643885	50649262	5378	2	1154	uc003dax.3	0	ENSG00000114737	CISH	cytokine inducible SH2 containing protein	uc003dax.3;uc010hlq.3;uc003dar.3;uc003das.3;uc010hlo.3;uc010hlp.3;uc011bdr.3;uc003dat.3;uc003dau.3;uc003dav.3;uc003day.2;uc003daz.2;uc003dba.2;uc010hlr.2	1154;1154;51161;51161;51161;51161;51161;51161;51409;51409;7867;7867;7867;7867	0;0;-43913;-43913;-43913;-43913;-43913;-40678;42553;42227;0;-3932;-3932;-4302
chr3	51720335	51720877	543	*	Intron (uc003dbk.5/51368, intron 3 of 4)	3	51705643	51738339	32697	1	51368	uc031sac.1	14692	ENSG00000164081	TEX264	testis expressed 264, ER-phagy receptor	uc003dbh.3;uc011bdt.2;uc011bdu.2;uc003dbj.3;uc003dbo.4;uc010hlu.3;uc010hlv.3;uc003dbk.5;uc010hls.4;uc010hlt.4;uc021wyt.2;uc031saa.1;uc003dbm.4;uc021wyu.1;uc031sab.1;uc031sac.1	23132;23132;23132;23132;2912;2912;2912;51368;51368;51368;51368;51368;51368;51368;51368;51368	144739;144739;56985;56047;-20204;-20204;-20204;0;0;0;0;0;0;0;0;0
chr3	53162862	53164788	1927	*	Promoter (<=1kb)	3	53122501	53164470	41970	2	91869	uc003dgj.3	0	ENSG00000163933	RFT1	RFT1 homolog	uc003dgl.3;uc003dgm.3;uc003dgn.2;uc003dgj.3	5580;5580;5580;91869	-30435;-30435;-47632;0
chr3	53162862	53164788	1927	*	Promoter (<=1kb)	3	53122501	53164470	41970	2	91869	uc003dgj.3	0	ENSG00000163933	RFT1	RFT1 homolog	uc003dgl.3;uc003dgm.3;uc003dgn.2;uc003dgj.3	5580;5580;5580;91869	-30435;-30435;-47632;0
chr3	60975386	60976424	1039	*	Intron (uc003dkx.4/2272, intron 3 of 9)	3	59735036	61237133	1502098	2	2272	uc003dkx.4	260709	ENSG00000189283	FHIT	fragile histidine triad diadenosine triphosphatase	uc003dkx.4;uc003dky.3;uc010hnn.1	2272;2272;2272	0;0;0
chr3	72337744	72339083	1340	*	Distal Intergenic	3	72200408	72223490	23083	1	201617	uc003dpd.2	137336	ENSG00000243083	LINC00870	long intergenic non-protein coding RNA 870	NA	NA	NA
chr3	97629645	97630972	1328	*	Intron (uc021xbn.2/131544, intron 15 of 21)	3	97666205	97686476	20272	2	84864	uc010hpa.1	55504	ENSG00000170854	RIOX2	ribosomal oxygenase 2	uc021xbn.2;uc003drz.2;uc003dsa.2;uc003dsb.1;uc003dsc.1;uc010hpa.1;uc010hpb.2	131544;84864;84864;84864;84864;84864;84864	0;60323;60323;60323;60323;55504;60323
chr3	98312032	98313015	984	*	Promoter (<=1kb)	3	98298290	98312455	14166	2	1371	uc003dsx.3	0	ENSG00000080819	CPOX	coproporphyrinogen oxidase	uc003dsx.3;uc011bgz.2	1371;1371	0;0
chr3	101248519	101249969	1451	*	Distal Intergenic	3	101237711	101242731	5021	1	131909	uc003duy.1	10808	NA	ARB2BP	ARB2 family member B, pseudogene	uc003duy.1;uc003duz.4;uc003dva.3;uc003dvb.3;uc003dvc.3;uc003dvd.3;uc003dut.3;uc003duu.3;uc003duv.3;uc003duw.3;uc003dux.3	131909;54931;57092;57092;57092;57092;57337;57337;57337;57337;57337	10808;-30711;-43073;-43073;-43073;-43073;-16434;-16434;-16434;-16434;-16434
chr3	129180396	129181560	1165	*	Promoter (<=1kb)	3	129180152	129207240	27089	1	55764	uc011bkz.1	244	ENSG00000163913	IFT122	intraflagellar transport 122	uc011bkx.1;uc003eml.3;uc003emm.3;uc003emn.3;uc003emo.3;uc003emp.3;uc010htc.3;uc011bky.2;uc011bkz.1;uc003emr.3;uc011bla.2;uc010htd.1;uc010hte.3;uc003ems.3;uc003emh.2;uc003emi.2;uc003emj.2;uc003emk.2;uc011bkw.2;uc003emg.3	55764;55764;55764;55764;55764;55764;55764;55764;55764;55764;55764;55764;55764;55764;8930;8930;8930;8930;8930;90288	0;0;0;0;0;0;0;0;0;-404;-404;-18800;-24789;-25474;-21374;-21374;-21374;-21374;-21374;-32902
chr3	132021289	132022755	1467	*	Distal Intergenic	3	132036211	132077690	41480	1	55	uc003eon.3	-13456	ENSG00000014257	ACP3	acid phosphatase 3	uc003eom.3;uc003eon.3;uc010htp.2;uc003eop.4	131034;55;55;55	-17035;-13456;-13456;-13456
chr3	138594194	138595473	1280	*	Distal Intergenic	3	138663066	138665982	2917	2	668	uc003esw.3	70509	ENSG00000183770	FOXL2	forkhead box L2	NA	NA	NA
chr3	138839616	138840836	1221	*	Intron (uc003eta.3/60467, intron 2 of 2)	3	138823027	138844005	20979	1	60467	uc003eta.3	16589	ENSG00000232416	BPESC1	blepharophimosis, epicanthus inversus and ptosis candidate 1	uc003eta.3	60467	0
chr3	138839616	138840836	1221	*	Intron (uc003eta.3/60467, intron 2 of 2)	3	138823027	138844005	20979	1	60467	uc003eta.3	16589	ENSG00000232416	BPESC1	blepharophimosis, epicanthus inversus and ptosis candidate 1	uc003eta.3	60467	0
chr3	142803584	142804664	1081	*	Distal Intergenic	3	142838618	142842856	4239	1	9435	uc003evm.3	-33954	ENSG00000175040	CHST2	carbohydrate sulfotransferase 2	uc003evh.1;uc003evi.1;uc003evj.1;uc003evk.1;uc003evl.1;uc003evm.3	23350;23350;23350;23350;23350;9435	83212;83212;83203;83203;58960;-33954
chr3	143001643	143002979	1337	*	Intron (uc003evn.3/285195, intron 14 of 15)	3	143061088	143065913	4826	1	100885796	uc031sbu.1	-58109	ENSG00000240012	SLC9A9-AS1	SLC9A9 antisense RNA 1	uc003evn.3	285195	0
chr3	152016563	152017165	603	*	Promoter (<=1kb)	3	152016771	152018156	1386	1	4154	uc003ezk.1	0	ENSG00000152601	MBNL1	muscleblind like splicing regulator 1	uc011boe.2;uc011bof.3;uc003ezh.3;uc003ezi.3;uc003ezj.3;uc003ezk.1;uc003ezl.3;uc003ezm.3;uc003ezn.3;uc003ezo.3;uc003ezp.3;uc010hvo.3	401093;401093;4154;4154;4154;4154;4154;4154;4154;4154;4154;645843	-29148;-29148;0;0;0;0;-29;-29;-29;-29;-29;41614
chr3	155000375	155001155	781	*	Distal Intergenic	3	155008021	155011489	3469	2	100507537	uc003fah.2	10334	ENSG00000240045	STRIT1	small transmembrane regulator of ion transport 1	uc003fah.2	100507537	10334
chr3	167751611	167752678	1068	*	Intron (uc003ffe.2/27333, intron 8 of 15)	3	167727654	167813417	85764	2	27333	uc003ffe.2	60739	ENSG00000173905	GOLIM4	golgi integral membrane protein 4	uc003ffe.2;uc011bpe.1;uc011bpf.1;uc011bpg.1	27333;27333;27333;27333	0;0;0;0
chr3	167833972	167834829	858	*	Distal Intergenic	3	167727654	167813417	85764	2	27333	uc011bpg.1	-20555	ENSG00000173905	GOLIM4	golgi integral membrane protein 4	uc003ffe.2;uc011bpe.1;uc011bpf.1;uc011bpg.1	27333;27333;27333;27333	0;0;0;0
chr3	176915539	176916108	570	*	Promoter (<=1kb)	3	176769292	176915048	145757	2	79718	uc003fiy.2	-491	ENSG00000177565	TBL1XR1	TBL1X/Y related 1	uc003fiw.4;uc003fix.4;uc011bpz.2;uc003fiy.2	79718;79718;79718;79718	-1273;-491;-491;-491
chr3	177077601	177078272	672	*	Distal Intergenic	3	177159709	177470492	310784	1	100505566	uc031sch.1	-81437	ENSG00000228221	LINC00578	long intergenic non-protein coding RNA 578	NA	NA	NA
chr3	178750647	178751579	933	*	Intron (uc003fjg.3/64393, intron 2 of 5)	3	178735011	178789656	54646	2	64393	uc003fjg.3	38077	ENSG00000172667	ZMAT3	zinc finger matrin-type 3	uc003fjg.3;uc003fji.3	64393;64393	0;0
chr3	183078581	183079784	1204	*	Intron (uc003fli.1/23101, intron 3 of 29)	3	183016545	183118336	101792	2	23101	uc003flp.1	38552	ENSG00000053524	MCF2L2	MCF.2 cell line derived transforming sequence-like 2	uc003fli.1;uc003flj.1;uc003flp.1;uc011bqs.1	23101;23101;23101;23101	0;0;0;-49702
chr3	183735311	183736563	1253	*	Promoter (<=1kb)	3	183637724	183735727	98004	2	10057	uc003fmg.3	0	ENSG00000114770	ABCC5	ATP binding cassette subfamily C member 5	uc010hxl.3;uc011bqt.2;uc003fmg.3;uc003fmh.3;uc010hxm.3;uc010hxn.3;uc010hxo.3;uc003fmi.3;uc031scp.1;uc003fmk.3;uc003fmj.3;uc011bqu.2;uc011bqv.2;uc010hxp.3	10057;10057;10057;10057;10057;10057;10057;10057;100873982;170572;200909;200909;200909;200909	-3076;-3076;0;0;0;0;0;0;11185;-34272;-12769;-12967;-14056;-16282
chr3	194208533	194209515	983	*	Promoter (<=1kb)	3	194207869	194239008	31140	1	401106	uc003fua.2	664	NA	ATP13A3-DT	ATP13A3 divergent transcript	uc021xja.1;uc003fua.2;uc003fty.4;uc003ftz.1	401106;401106;79572;79572	0;0;-19565;-35763
chr3	195920529	195922047	1519	*	Distal Intergenic	3	195924323	195938300	13978	2	131540	uc003fwc.3	16253	ENSG00000163958	ZDHHC19	zinc finger DHHC-type palmitoyltransferase 19	uc003fwc.3;uc010hzz.3;uc010iaa.3;uc010iab.3;uc011btu.1;uc003fwd.3;uc010iac.1;uc003fwe.3;uc011bts.2;uc011btt.2;uc003fwg.3;uc003fwh.3	131540;131540;131540;131540;200931;200931;200931;200931;401109;401109;5130;5130	16253;16253;16253;16253;-21336;-21336;-32348;-32765;51022;50903;92537;92537
chr3	196358723	196359811	1089	*	Distal Intergenic	3	196366656	196388874	22219	1	375387	uc003fwv.3	-6845	ENSG00000174004	NRROS	negative regulator of reactive oxygen species	uc010iai.3;uc003fwv.3	200933;375387	62998;-6845
chr3	196358723	196359811	1089	*	Distal Intergenic	3	196366656	196388874	22219	1	375387	uc003fwv.3	-6845	ENSG00000174004	NRROS	negative regulator of reactive oxygen species	uc010iai.3;uc003fwv.3	200933;375387	62998;-6845
chr4	989706	990437	732	*	Intron (uc003gby.3/3425, intron 2 of 13)	4	981445	987224	5780	2	10861	uc003gcc.3	-2482	ENSG00000145217	SLC26A1	solute carrier family 26 member 1	uc003gbx.3;uc003gcb.3;uc003gcc.3;uc003gbw.4;uc010ibn.4;uc003gby.3;uc003gbz.3;uc003gca.3;uc003gce.3;uc003gcf.3;uc003gcg.3;uc010ibo.3;uc021xkf.1;uc010ibl.1;uc003gbp.1;uc003gbq.3;uc003gbr.3;uc003gbs.3;uc003gbt.3	10861;10861;10861;1609;1609;3425;3425;3425;53834;53834;53834;53834;84286;84286;84286;84286;84286;84286;84286	-2482;-2482;-2482;-22358;-22358;0;0;0;-14503;-15173;-15323;-15497;63444;63444;63444;63444;63444;63444;63444
chr4	1023075	1023993	919	*	Distal Intergenic	4	1005934	1020686	14753	1	53834	uc010ibo.3	17141	ENSG00000127418	FGFRL1	fibroblast growth factor receptor like 1	uc003gbx.3;uc003gcb.3;uc003gcc.3;uc003gci.3;uc003gcj.3;uc010ibp.3;uc010ibq.3;uc003gby.3;uc003gbz.3;uc003gca.3;uc003gce.3;uc003gcf.3;uc003gcg.3;uc010ibo.3	10861;10861;10861;285498;285498;285498;285498;3425;3425;3425;53834;53834;53834;53834	-35851;-35851;-35851;83359;83359;83359;83359;0;0;0;18135;17465;17315;17141
chr4	4341110	4341822	713	*	Distal Intergenic	4	4349869	4419654	69786	1	27065	uc031sde.1	-8047	ENSG00000168824	NSG1	neuronal vesicle trafficking associated 1	uc003ghu.3;uc003ghv.3;uc010icy.3;uc010icz.3;uc031sde.1;uc011bvz.2;uc011bwa.1;uc003ghz.3;uc003gia.3;uc011bvy.2;uc003ght.3	166793;166793;166793;166793;27065;27065;27065;27065;27065;55646;55646	49186;49186;49186;37072;-8047;-8047;-45762;-45762;-45762;-49362;-49214
chr4	6890832	6891767	936	*	Distal Intergenic	4	6911171	7034845	123675	1	57533	uc011bwg.2	-19404	ENSG00000132405	TBC1D14	TBC1 domain family member 14	uc011bwg.2;uc003gjs.4;uc003gjq.4;uc003gjr.4	57533;57533;9778;9778	0;0;106373;106373
chr4	6917893	6918754	862	*	Intron (uc011bwg.2/57533, intron 1 of 13)	4	6911495	7034845	123351	1	57533	uc003gjs.4	6398	ENSG00000132405	TBC1D14	TBC1 domain family member 14	uc011bwg.2;uc003gjs.4;uc003gjq.4;uc003gjr.4	57533;57533;9778;9778	0;0;133434;133434
chr4	10182175	10183414	1240	*	Distal Intergenic	4	10075963	10118573	42611	2	9948	uc021xlw.1	-63602	ENSG00000071127	WDR1	WD repeat domain 1	NA	NA	NA
chr4	38668683	38669621	939	*	Intron (uc003gtg.2/51274, intron 1 of 3)	4	38628026	38666430	38405	2	79667	uc003gtf.3	-2253	NA	KLF3-AS1	KLF3 antisense RNA 1	uc003gtg.2;uc003gth.4;uc003gte.1;uc003gtf.3	51274;51274;79667;79667	0;0;-2434;-2253
chr4	48244317	48247076	2760	*	Intron (uc003gxz.3/7006, intron 1 of 17)	4	48137800	48271814	134015	2	7006	uc003gxz.3	24738	ENSG00000135605	TEC	tec protein tyrosine kinase	uc003gxz.3	7006	0
chr4	48244317	48247076	2760	*	Intron (uc003gxz.3/7006, intron 1 of 17)	4	48137800	48271814	134015	2	7006	uc003gxz.3	24738	ENSG00000135605	TEC	tec protein tyrosine kinase	uc003gxz.3	7006	0
chr4	48682947	48684060	1114	*	Intron (uc003gyh.1/285527, intron 3 of 63)	4	48619621	48655826	36206	2	285527	uc003gyl.1	-27121	ENSG00000075539	FRYL	FRY like transcription coactivator	uc003gyh.1;uc003gyk.3;uc003gyl.1;uc003gym.1;uc003gyn.3	285527;285527;285527;285527;285527	0;0;-27121;0;0
chr4	56252368	56253636	1269	*	Promoter (<=1kb)	4	56232768	56251747	18980	2	100506462	uc003haw.2	-621	ENSG00000249700	SRD5A3-AS1	SRD5A3 antisense RNA 1	uc003hav.1;uc003haw.2;uc003hax.3;uc011bzy.2;uc003hau.3;uc010igu.2;uc003haz.2;uc003hba.2	100506462;100506462;55858;55858;79644;9575;9575;9575	-2805;-621;-8444;-8444;39980;62027;158463;159440
chr4	68388854	68389631	778	*	Intron (uc010ihj.1/1060, intron 1 of 14)	4	68337989	68396632	58644	2	1060	uc010ihj.1	7001	ENSG00000145241	CENPC	centromere protein C	uc010ihj.1;uc003hdd.1;uc010ihk.1;uc010ihl.3;uc010ihm.1;uc003hde.4;uc003hdf.3	1060;1060;1060;1060;1060;26228;26228	0;0;0;-27924;0;-34815;-34815
chr4	79612629	79613871	1243	*	Distal Intergenic	4	79567148	79605655	38508	1	100505702	uc021xpk.1	45481	NA	LINC01094	long intergenic non-protein coding RNA 1094	uc003hlf.3;uc003hlg.3;uc003hlh.3;uc003hli.3;uc021xpj.1;uc021xpk.1	100505702;100505702;100505702;100505702;100505702;100505702	45481;45481;45481;45481;45481;45481
chr4	84677884	84680117	2234	*	Distal Intergenic	4	84457470	84527027	69558	1	84803	uc003hox.4	220414	ENSG00000138678	GPAT3	glycerol-3-phosphate acyltransferase 3	NA	NA	NA
chr4	84677884	84680117	2234	*	Distal Intergenic	4	84457470	84527027	69558	1	84803	uc003hox.4	220414	ENSG00000138678	GPAT3	glycerol-3-phosphate acyltransferase 3	NA	NA	NA
chr4	103997218	103998645	1428	*	Promoter (<=1kb)	4	103941387	103998170	56784	2	133308	uc003hwx.4	0	ENSG00000164038	SLC9B2	solute carrier family 9 member B2	uc003hxb.1;uc003hxc.1;uc010iln.2;uc003hwx.4;uc003hwy.3;uc011cew.2;uc011cex.1;uc011cey.2;uc003hwz.3	1062;1062;133308;133308;133308;133308;133308;133308;56898	120921;120921;-18090;0;0;0;0;-8469;22379
chr4	129268279	129269235	957	*	Distal Intergenic	4	129190392	129209984	19593	2	10424	uc003igg.3	-58295	ENSG00000164040	PGRMC2	progesterone receptor membrane component 2	NA	NA	NA
chr4	129607010	129608162	1153	*	Distal Intergenic	4	129730779	129785787	55009	1	79960	uc003igj.3	-122617	ENSG00000077684	JADE1	jade family PHD finger 1	NA	NA	NA
chr4	151242208	151242767	560	*	Exon (uc010ipi.3/987, exon 4 of 11)	4	151185811	151232521	46711	2	987	uc003ilr.4	-9687	ENSG00000198589	LRBA	LPS responsive beige-like anchor protein	uc003ilr.4;uc010ipi.3;uc003ils.4;uc003ilt.4;uc003ilu.4;uc010ipj.3	987;987;987;987;987;987	-9687;0;0;0;0;0
chr4	159841131	159842339	1209	*	Intron (uc003iqf.1/152940, intron 3 of 4)	4	159814684	159956333	141650	2	152940	uc003iqf.1	113994	ENSG00000164123	SPMIP2	sperm microtubule inner protein 2	uc003iqf.1;uc010iqt.1;uc003iqe.4	152940;152940;57600	0;0;150949
chr4	164116066	164117424	1359	*	Distal Intergenic	4	164049823	164088073	38251	2	92345	uc003iqj.3	-27993	ENSG00000145414	NAF1	nuclear assembly factor 1 ribonucleoprotein	uc010iqw.1;uc003iqj.3	92345;92345	-27993;-27993
chr4	169178636	169179811	1176	*	Intron (uc003irp.3/55601, intron 25 of 37)	4	169137445	169146827	9383	2	55601	uc003iro.3	-31809	ENSG00000137628	DDX60	DExD/H-box helicase 60	uc003irp.3;uc003iro.3	55601;55601	0;-31809
chr4	173919886	173920865	980	*	Intron (uc003isv.3/442117, intron 10 of 12)	4	174089904	174245118	155215	1	51809	uc003isz.4	-169039	ENSG00000109586	GALNT7	polypeptide N-acetylgalactosaminyltransferase 7	uc003isv.3	442117	0
chr4	174202926	174203960	1035	*	Intron (uc003isz.4/51809, intron 2 of 11)	4	174213259	174245118	31860	1	51809	uc011ckb.2	-9299	ENSG00000109586	GALNT7	polypeptide N-acetylgalactosaminyltransferase 7	uc011ckc.1;uc003ita.3;uc003itb.2;uc003isz.4;uc011ckb.2	3148;3148;3148;51809;51809	50960;51549;51635;0;-9299
chr4	184316329	184317023	695	*	Distal Intergenic	4	184365789	184369049	3261	1	55602	uc003ivp.1	-48766	ENSG00000168564	CDKN2AIP	CDKN2A interacting protein	uc003ivp.1;uc003ivq.1	55602;55602	-48766;-48766
chr4	185655315	185655798	484	*	Promoter (<=1kb)	4	185618801	185655286	36486	2	79682	uc003iwr.1	-29	ENSG00000151725	CENPU	centromere protein U	uc003iwj.2;uc003iwk.2;uc003iwm.2;uc003iwn.2;uc003iws.1;uc003iww.2;uc011ckm.1;uc003iwt.1;uc003iwu.1;uc011ckn.1;uc010ise.1;uc003iwp.3;uc003iwq.3;uc003iwr.1	201973;201973;201973;201973;2180;2180;2180;2180;2180;2180;2180;79682;79682;79682	84548;84548;84548;84548;32112;71144;73807;77615;91417;91417;39231;-3193;-29;-29
chr5	1105419	1106373	955	*	Intron (uc003jbu.3/10723, intron 1 of 23)	5	1050489	1112172	61684	2	10723	uc003jbu.3	5799	ENSG00000113504	SLC12A7	solute carrier family 12 member 7	uc021xvy.1;uc003jbu.3	100616479;10723	-42330;0
chr5	1199897	1200896	1000	*	Promoter (<=1kb)	5	1201710	1225230	23521	1	340024	uc003jbw.4	-814	ENSG00000174358	SLC6A19	solute carrier family 6 member 19	uc003jbw.4;uc003jby.2	340024;348932	0;-24574
chr5	1200993	1201922	930	*	Promoter (<=1kb)	5	1201710	1225230	23521	1	340024	uc003jbw.4	0	ENSG00000174358	SLC6A19	solute carrier family 6 member 19	uc003jbw.4;uc003jby.2	340024;348932	0;-23548
chr5	32287204	32288841	1638	*	Intron (uc003jhq.3/54545, intron 1 of 15)	5	32227111	32313114	86004	2	54545	uc003jhq.3	24273	ENSG00000150712	MTMR12	myotubularin related protein 12	uc003jhq.3;uc010iuk.3;uc010iul.3	54545;54545;54545	0;0;0
chr5	40801750	40802682	933	*	Distal Intergenic	5	40759481	40798297	38817	2	5562	uc003jmc.3	-3453	ENSG00000132356	PRKAA1	protein kinase AMP-activated catalytic subunit alpha 1	uc021xxr.1;uc003jma.3;uc010ivg.3;uc011cpm.2;uc003jmb.3;uc003jmc.3;uc003jme.1;uc003jmf.1;uc003jmg.3	100506548;23548;23548;23548;5562;5562;6167;619564;84674	26562;-45678;-45678;-45678;-3453;-3453;32705;30155;-38728
chr5	42981145	42982727	1583	*	Distal Intergenic	5	43014831	43018913	4083	2	648987	uc003jnc.3	36186	ENSG00000177738	ANXA2R-OT1	ANXA2R overlapping transcript 1	uc003jnc.3;uc003jnd.3;uc021xye.1	648987;648987;648987	36186;36186;36186
chr5	55333089	55333882	794	*	Distal Intergenic	5	55290995	55299475	8481	1	441072	uc003jqs.3	42094	ENSG00000227908	IL6ST-DT	IL6ST divergent transcript	uc003jqq.3;uc003jqr.3;uc010iwb.3;uc003jqs.3	3572;3572;3572;441072	-42268;-42268;-42268;42094
chr5	77883154	77884869	1716	*	Intron (uc003kfo.3/10184, intron 2 of 4)	5	77920640	77937985	17346	2	10184	uc003kfp.1	53116	ENSG00000145685	LHFPL2	LHFPL tetraspan subfamily member 2	uc003kfo.3;uc003kfp.1	10184;10184	0;53116
chr5	93009201	93010453	1253	*	Intron (uc010jbd.3/83989, intron 10 of 10)	5	92956402	92956494	93	2	100313887	uc021ybl.1	-52707	ENSG00000284336	MIR2277	microRNA 2277	uc010jbd.3;uc011cuf.2;uc011cug.2;uc011cuh.2;uc011cui.2;uc011cuj.2	83989;83989;83989;83989;83989;83989	0;0;0;0;0;0
chr5	94981961	94982879	919	*	Promoter (<=1kb)	5	94982481	94992849	10369	1	317671	uc003klg.3	0	ENSG00000175449	RFESD	Rieske Fe-S domain containing	uc003kld.3;uc010jbg.3;uc011cum.2;uc003kle.1;uc003klg.3;uc003klf.3;uc011cun.2;uc010jbh.1;uc003klh.1;uc003kli.1;uc003klj.1	153642;153642;153642;285601;317671;317671;317671;83890;83890;83890;83890	91136;91136;91136;25981;0;0;0;35816;35835;35835;35835
chr5	96077453	96078368	916	*	Promoter (<=1kb)	5	96077578	96108591	31014	1	831	uc010jbk.2	0	ENSG00000153113	CAST	calpastatin	uc003kml.3;uc010jbm.2;uc003kmm.3;uc003kmn.3;uc003klt.3;uc021ybr.1;uc003klx.3;uc011cuo.1;uc003klz.1;uc011cup.2;uc011cuq.2;uc021ybs.1;uc021ybt.1;uc003kma.2;uc011cur.2;uc011cus.2;uc011cut.2;uc003kmd.3;uc003kmh.3;uc010jbj.3;uc010jbk.2;uc003kmi.3;uc010jbl.2;uc003kmk.3	51752;51752;51752;51752;831;831;831;831;831;831;831;831;831;831;831;831;831;831;831;831;831;831;831;831	65524;71480;65524;71480;0;0;0;0;0;38960;0;0;0;0;0;0;0;0;0;0;0;-876;-876;-14919
chr5	96270207	96271389	1183	*	Promoter (<=1kb)	5	96271346	96365115	93770	1	4012	uc003kmv.1	0	ENSG00000113441	LNPEP	leucyl and cystinyl aminopeptidase	uc003kmv.1;uc003kmw.1;uc003kmq.3;uc003kmr.3;uc003kms.3;uc003kmt.3;uc003kmu.3	4012;4012;64167;64167;64167;64167;64167	0;-22767;58563;58563;58563;58563;54939
chr5	100419761	100420590	830	*	Distal Intergenic	5	100221015	100238987	17973	2	7903	uc003knl.3	-180774	ENSG00000113532	ST8SIA4	ST8 alpha-N-acetyl-neuraminide alpha-2,8-sialyltransferase 4	NA	NA	NA
chr5	111883695	111884539	845	*	Distal Intergenic	5	111755280	111756677	1398	1	54508	uc003kpx.2	128415	ENSG00000278921	EPB41L4A-DT	EPB41L4A divergent transcript	NA	NA	NA
chr5	121448687	121449626	940	*	Distal Intergenic	5	121465215	121489266	24052	1	133923	uc003ksv.3	-15589	ENSG00000164185	ZNF474	zinc finger protein 474	uc021ycz.1;uc003ksv.3;uc010jcp.3;uc010jcq.3;uc010jcr.3;uc011cwk.2;uc003ksu.3	100505841;133923;4015;4015;4015;4015;4015	-46245;-15589;-38815;-36895;-35818;-35769;-34632
chr5	131651049	131651938	890	*	Intron (uc003kwq.3/6583, intron 3 of 9)	5	131631118	131663096	31979	1	6583	uc010jdq.1	19931	ENSG00000197208	SLC22A4	solute carrier family 22 member 4	uc021ydk.1;uc021ydj.1;uc003kwu.1;uc003kwq.3;uc010jdq.1;uc003kwn.3;uc003kwo.3;uc003kwp.3	100500865;553103;553103;6583;6583;8572;8572;8572	49353;0;53258;0;0;57698;57698;57698
chr5	131758223	131758846	624	*	Intron (uc003kwy.3/441108, intron 2 of 3)	5	131746465	131822549	76085	1	441108	uc010jds.2	11758	NA	CARINH	colitis associated IRF1 antisense regulator of intestinal homeostasis	uc003kxd.2;uc003kwy.3;uc003kwz.2;uc010jds.2;uc003kww.4;uc003kwx.4;uc010jdr.1	3659;441108;441108;441108;6584;6584;6584	67619;0;0;0;52822;52822;37203
chr5	133268128	133269043	916	*	Distal Intergenic	5	133291198	133304406	13209	2	56951	uc003kyo.3	35363	ENSG00000113583	C5orf15	chromosome 5 open reading frame 15	uc003kyo.3;uc003kyp.2;uc003kyq.2;uc003kyr.2;uc031slc.1	56951;7416;7416;7416;7416	35363;71614;71614;71781;173061
chr5	133801407	133802501	1095	*	Distal Intergenic	5	133737756	133747598	9843	2	91368	uc011cxs.2	-53809	ENSG00000237190	CDKN2AIPNL	CDKN2A interacting protein N-terminal like	NA	NA	NA
chr5	134469309	134470712	1404	*	Intron (uc003laj.2/100996485, intron 2 of 5)	5	134363424	134369964	6541	2	5307	uc010jea.3	-99345	ENSG00000069011	PITX1	paired like homeodomain 1	uc003laj.2	100996485	0
chr5	134471461	134472769	1309	*	Intron (uc003laj.2/100996485, intron 2 of 5)	5	134363424	134369964	6541	2	5307	uc010jea.3	-101497	ENSG00000069011	PITX1	paired like homeodomain 1	uc003laj.2	100996485	0
chr5	134717468	134718504	1037	*	Intron (uc003lam.1/9555, intron 2 of 8)	5	134670071	134734928	64858	2	9555	uc003lam.1	16424	ENSG00000113648	MACROH2A1	macroH2A.1 histone	uc003laj.2;uc003lal.1;uc003lam.1;uc003lan.1;uc003lao.1;uc011cxz.1;uc003las.1;uc003lat.1	100996485;9555;9555;9555;9555;9555;9555;9555	0;-30234;0;0;0;0;0;0
chr5	137673169	137673977	809	*	Promoter (<=1kb)	5	137673224	137685418	12195	1	51307	uc003lcv.3	0	ENSG00000120709	FAM53C	family with sequence similarity 53 member C	uc003lcv.3;uc003lcw.3;uc011cyq.2;uc011cyr.2;uc003lcy.1;uc010jew.1;uc011cys.1;uc003lcp.1;uc003lcq.1;uc003lcr.1;uc003lcs.1;uc011cyp.1;uc003lct.1;uc003lcu.1;uc010jet.1;uc031slf.1	51307;51307;51307;51307;51780;51780;51780;995;995;995;995;995;995;995;995;995	0;0;0;0;-14308;-34386;-48001;-5653;-5653;-5653;0;0;-6266;-6266;-6266;-8594
chr5	138067852	138068733	882	*	Distal Intergenic	5	138089107	138270723	181617	1	1495	uc003ldh.3	-20374	ENSG00000044115	CTNNA1	catenin alpha 1	uc003ldh.3;uc003ldi.3;uc011cyx.2;uc011cyy.2;uc003ldj.3	1495;1495;1495;1495;1495	-20374;-20374;-20374;-20374;-48879
chr5	138567752	138568678	927	*	Distal Intergenic	5	138282410	138534065	251656	2	64374	uc003ldp.3	-33687	ENSG00000120725	SIL1	SIL1 nucleotide exchange factor	uc003ldv.1;uc003ldo.3;uc003ldp.3;uc010jfa.3;uc003ldr.3;uc003lds.3;uc003ldt.3;uc003ldu.3;uc010jfb.3	26821;64374;64374;724102;724102;9782;9782;9782;9782	-45791;-33687;-33687;-40763;-40763;-40763;-40763;-40763;-40763
chr5	139049293	139050073	781	*	Intron (uc010jfg.1/51523, intron 1 of 2)	5	139028518	139062680	34163	1	51523	uc003let.2	20775	ENSG00000171604	CXXC5	CXXC finger protein 5	uc010jfg.1;uc003let.2;uc003leq.3;uc003ler.3	51523;51523;7322;7322	0;0;108542;108542
chr5	140057935	140059444	1510	*	Exon (uc003lgu.3/3035, exon 3 of 12)	5	140050381	140053171	2791	2	373863	uc003lgt.3	-4764	ENSG00000256453	DND1	DND microRNA-mediated repression inhibitor 1	uc003lgy.1;uc010jfv.1;uc003lgx.3;uc011czr.2;uc011czs.2;uc011czt.2;uc011czu.2;uc003lgu.3;uc003lgv.4;uc003lgw.4;uc011czm.3;uc011czn.3;uc011czo.3;uc011czp.3;uc011czq.3;uc011czk.1;uc003lgq.3;uc021yen.1;uc003lgt.3;uc003lgp.3;uc021yem.1;uc003lgr.4;uc011czl.1;uc011czj.1;uc003lgl.3;uc003lgm.3;uc010jft.3;uc003lgn.3;uc003lgo.3;uc011czx.1;uc011czw.1;uc011czv.1;uc003lgi.2;uc003lgj.2;uc021yej.1;uc021yek.1	153527;23438;23438;23438;23438;23438;23438;3035;3035;3035;3035;3035;3035;3035;3035;3550;3550;3550;373863;4695;4695;54853;54853;55374;55374;55374;55374;55374;55374;56662;56663;56664;929;929;929;929	-20588;-11574;-11574;-11574;-11574;-11574;-15649;0;0;0;0;0;0;0;0;30551;30551;26262;-4764;-30565;-30565;13551;9738;38923;38923;38923;38897;37044;35900;-46300;-39067;-31417;-44900;-44649;-44649;-44649
chr5	145234043	145234811	769	*	Distal Intergenic	5	145239296	145252531	13236	2	643226	uc003lns.1	17720	ENSG00000204928	GRXCR2	glutaredoxin and cysteine rich domain containing 2	uc003lno.1;uc003lnp.1;uc003lnq.1;uc003lnr.1;uc003lns.1	153768;153768;153768;153768;643226	-19144;-19144;-19144;-19144;17720
chr5	148442589	148443223	635	*	Promoter (<=1kb)	5	147929700	148442737	513038	2	79628	uc003lpp.1	0	ENSG00000169247	SH3TC2	SH3 domain and tetratricopeptide repeats 2	uc003lpp.1;uc010jgw.3;uc003lps.3;uc003lpt.3;uc003lpu.3;uc010jgx.3;uc003lpv.1;uc011dbz.1;uc003lpw.1	79628;79628;79628;79628;79628;79628;79628;79628;79628	0;-31339;-21409;0;0;0;0;0;0
chr5	149291844	149293473	1630	*	Intron (uc003lrg.4/5145, intron 6 of 21)	5	149237519	149324356	86838	2	5145	uc003lrg.4	30883	ENSG00000132915	PDE6A	phosphodiesterase 6A	uc003lrh.3;uc003lrg.4;uc021yfs.1	1836;5145;5145	-46827;0;0
chr5	150479522	150481330	1809	*	3' UTR	5	150409504	150467221	57718	2	10318	uc021ygb.1	-12301	ENSG00000145901	TNIP1	TNFAIP3 interacting protein 1	uc010jhl.3;uc010jho.2;uc010jhp.2;uc010jhq.2;uc010jhm.4;uc010jhn.4;uc003ltg.4;uc003lti.4;uc010jhr.3;uc011dco.3;uc031slv.1;uc003ltj.3;uc003ltk.3;uc021ygb.1;uc010jhs.2;uc011dcp.2;uc003ltl.2;uc003lto.2	10318;10318;10318;10318;10318;10318;10318;10318;10318;10318;10318;10318;10318;10318;10318;309;309;309	-36214;-36214;-36214;-36214;-34834;-34834;-18873;-18873;-18873;-18873;-18873;-12775;-12775;-12301;-12775;0;0;0
chr5	150593475	150593912	438	*	Intron (uc003ltq.3/26112, intron 1 of 8)	5	150560613	150585036	24424	2	26112	uc011dcq.3	-8439	ENSG00000198624	CCDC69	coiled-coil domain containing 69	uc031slw.1;uc011dcq.3;uc003ltq.3;uc010jhu.3;uc003ltr.4;uc011dcr.2;uc003ltt.1	26112;26112;26112;26112;2760;2760;2760	-28699;-8439;0;0;-38701;-38701;-45404
chr5	153752903	153753843	941	*	Intron (uc003lvg.1/55568, intron 4 of 6)	5	153769329	153825382	56054	2	386627	uc003lvi.3	71539	ENSG00000245275	SAP30L-AS1	SAP30L antisense RNA 1 (head to head)	uc003lvi.3;uc003lvg.1;uc003lvh.3;uc010jic.3;uc010jid.3	386627;55568;55568;55568;55568	71539;0;0;0;0
chr5	154032786	154034414	1629	*	Distal Intergenic	5	153975572	153975632	61	2	100422950	uc021ygg.1	-57154	ENSG00000264760	MIR3141	microRNA 3141	NA	NA	NA
chr5	159687590	159690191	2602	*	Intron (uc003lyb.1/79616, intron 4 of 6)	5	159656437	159665729	9293	1	2172	uc003lya.1	31153	ENSG00000170231	FABP6	fatty acid binding protein 6	uc003lxx.1;uc003lxz.1;uc003lya.1;uc003lyb.1;uc011dee.1;uc003lyc.1;uc011def.1	2172;2172;2172;79616;79616;79616;79616	73216;61542;31153;0;0;0;0
chr5	159687590	159690191	2602	*	Intron (uc003lyb.1/79616, intron 4 of 6)	5	159656437	159665729	9293	1	2172	uc003lya.1	31153	ENSG00000170231	FABP6	fatty acid binding protein 6	uc003lxx.1;uc003lxz.1;uc003lya.1;uc003lyb.1;uc011dee.1;uc003lyc.1;uc011def.1	2172;2172;2172;79616;79616;79616;79616	73216;61542;31153;0;0;0;0
chr5	168082930	168083700	771	*	Distal Intergenic	5	167982628	168006614	23987	2	79646	uc003lzz.2	-76316	ENSG00000120137	PANK3	pantothenate kinase 3	uc003mab.4;uc010jjg.4	6586;6586	644433;644433
chr5	169705457	169706845	1389	*	Intron (uc003man.1/3937, intron 3 of 20)	5	169687837	169695486	7650	2	3937	uc010jjo.1	-9971	ENSG00000043462	LCP2	lymphocyte cytosolic protein 2	uc010jjn.3;uc003mal.2;uc011des.1;uc003man.1;uc011det.1;uc010jjo.1	133874;133874;3937;3937;3937;3937	45507;45507;-11193;0;0;-9971
chr5	169733133	169734156	1024	*	Distal Intergenic	5	169675088	169724822	49735	2	3937	uc011det.1	-8311	ENSG00000043462	LCP2	lymphocyte cytosolic protein 2	uc011deu.1;uc003map.3;uc011des.1;uc003man.1;uc011det.1;uc010jjo.1	257358;30820;3937;3937;3937;3937	-24279;-46725;-38869;0;0;-37647
chr5	172199021	172200091	1071	*	Promoter (<=1kb)	5	172195093	172198203	3111	2	1843	uc003mbv.2	-818	ENSG00000120129	DUSP1	dual specificity phosphatase 1	uc003mbu.2;uc003mbv.2	1843;1843	-1387;-818
chr5	173287341	173288470	1130	*	Distal Intergenic	5	173315331	173383823	68493	1	80315	uc010jju.2	-26861	ENSG00000113742	CPEB4	cytoplasmic polyadenylation element binding protein 4	uc010jju.2;uc003mcs.4;uc010jjv.3;uc011dfg.2;uc003mcu.4	80315;80315;80315;80315;80315	-26861;-26861;-26861;-26861;-31611
chr5	177554319	177555069	751	*	Distal Intergenic	5	177558028	177575479	17452	1	64777	uc003mim.3	-2959	ENSG00000145916	RMND5B	required for meiotic nuclear division 5 homolog B	uc003mik.1;uc003mir.2;uc003mis.2;uc003mim.3;uc003min.3;uc003mio.3;uc011dgf.2;uc003miq.3	23138;55651;55651;64777;64777;64777;64777;64777	13763;25892;25892;-2959;-2959;-2959;-10040;-13272
chr5	179230448	179231168	721	*	Promoter (<=1kb)	5	179224598	179229875	5278	2	11282	uc003mkr.3	-573	ENSG00000161013	MGAT4B	alpha-1,3-mannosyl-glycoprotein 4-beta-N-acetylglucosaminyltransferase B	uc021yjg.1;uc003mkp.3;uc003mkq.3;uc003mkr.3;uc003mks.3;uc003mko.3;uc003mky.2;uc011dgt.1;uc011dgu.1;uc003mla.3;uc003mlb.3;uc003mlc.3;uc011dgr.2;uc011dgs.2;uc003mkt.1;uc003mkw.4;uc003mkx.3;uc003mkm.3;uc003mkn.1	100302156;11282;11282;11282;11282;4056;51149;51149;51149;51149;51149;51149;8878;8878;8878;8878;8878;9794;9794	-5102;-1981;-1479;-573;0;9462;54672;54672;54672;54672;54672;54672;-2220;-2835;-3156;-16674;-18317;70597;70597
chr5	180534282	180535502	1221	*	Distal Intergenic	5	180551357	180552304	948	2	26693	uc031smg.1	16802	ENSG00000185372	OR2V1	olfactory receptor family 2 subfamily V member 1	uc003mmt.3;uc031smg.1;uc011dhj.2	153579;26693;285659	67057;16802;-46441
chr5	180900018	180901727	1710	*	Distal Intergenic	5	180794288	180795226	939	1	81399	uc011dhm.2	105730	ENSG00000284662	OR4F16	olfactory receptor family 4 subfamily F member 16	NA	NA	NA
chr6	3160424	3160930	507	*	Distal Intergenic	6	3153902	3157783	3882	2	7280	uc003mvc.3	-2641	ENSG00000137267	TUBB2A	tubulin beta 2A class IIa	uc003mve.3;uc003mvf.3;uc003muy.3;uc003muz.3;uc003mva.3;uc011dht.2;uc003mvb.3;uc003mvc.3;uc003muv.4;uc010jni.3;uc003mux.3;uc011dhs.2	100507194;100507194;670;670;670;670;7280;7280;8737;8737;8737;8737	35071;35071;41498;41498;41498;41498;-3942;-2641;96302;96302;83426;83426
chr6	3209833	3210456	624	*	Distal Intergenic	6	3183052	3196001	12950	2	100507194	uc003mvf.3	-13832	ENSG00000230269	LINC02525	long intergenic non-protein coding RNA 2525	uc003mve.3;uc003mvf.3;uc003mvg.3;uc003mvj.4;uc010jnl.1;uc010jnm.1	100507194;100507194;347733;389362;389362;389362	-13832;-13832;17512;-48706;-48706;-48706
chr6	3288284	3289247	964	*	5' UTR	6	3259162	3268300	9139	1	389362	uc010jnm.1	29122	ENSG00000180822	PSMG4	proteasome assembly chaperone 4	uc003mvj.4;uc010jnl.1;uc010jnm.1;uc003mvn.3;uc003mvo.3;uc003mvm.3;uc003mvp.1;uc010jnn.3;uc010jno.2	389362;389362;389362;63027;63027;63027;63027;63027;63027	29122;29122;29122;0;0;0;0;0;0
chr6	3418752	3419600	849	*	Intron (uc003mvn.3/63027, intron 2 of 10)	6	3269207	3445218	176012	2	63027	uc003mvn.3	25618	ENSG00000137266	SLC22A23	solute carrier family 22 member 23	uc003mvn.3;uc003mvo.3;uc003mvm.3;uc003mvp.1;uc010jnn.3;uc010jno.2	63027;63027;63027;63027;63027;63027	0;0;0;0;0;0
chr6	4620545	4621506	962	*	Distal Intergenic	6	4706393	4955778	249386	1	9425	uc003mwi.3	-84887	ENSG00000153046	CDYL	chromodomain Y like	NA	NA	NA
chr6	4727763	4728906	1144	*	Intron (uc003mwi.3/9425, intron 2 of 8)	6	4706393	4955778	249386	1	9425	uc003mwi.3	21370	ENSG00000153046	CDYL	chromodomain Y like	uc003mwi.3;uc003mwj.3;uc003mwk.3	9425;9425;9425	0;-47774;-47774
chr6	5096662	5097219	558	*	Intron (uc003mwn.1/uc003mwn.1, intron 3 of 3)	6	5085720	5087455	1736	1	648791	uc011dia.1	10942	ENSG00000219607	PPP1R3G	protein phosphatase 1 regulatory subunit 3G	uc003mwp.3;uc003mwq.3;uc010jnu.3;uc011dia.1	57128;57128;57128;648791	163953;163953;163953;10942
chr6	6684048	6685444	1397	*	Distal Intergenic	6	6649848	6655216	5369	1	9450	uc003mwz.1	34200	ENSG00000112799	LY86	lymphocyte antigen 86	uc003mwy.1;uc003mwz.1	9450;9450	95114;34200
chr6	6701972	6702652	681	*	Distal Intergenic	6	6649848	6655216	5369	1	9450	uc003mwz.1	52124	ENSG00000112799	LY86	lymphocyte antigen 86	uc003mwy.1;uc003mwz.1	9450;9450	113038;52124
chr6	6704467	6705317	851	*	Distal Intergenic	6	6649848	6655216	5369	1	9450	uc003mwz.1	54619	ENSG00000112799	LY86	lymphocyte antigen 86	uc003mwy.1;uc003mwz.1	9450;9450	115533;54619
chr6	6886034	6887263	1230	*	Distal Intergenic	6	7107830	7252213	144384	1	6239	uc021yky.1	-220567	ENSG00000124782	RREB1	ras responsive element binding protein 1	NA	NA	NA
chr6	7143390	7144033	644	*	Intron (uc021yky.1/6239, intron 1 of 11)	6	7108865	7219324	110460	1	6239	uc003mxd.3	34525	ENSG00000124782	RREB1	ras responsive element binding protein 1	uc021yky.1;uc010jnw.3;uc003mxb.3;uc003mxc.3;uc010jnx.3;uc003mxd.3;uc021ykz.1;uc021yla.1	6239;6239;6239;6239;6239;6239;6239;6239	0;0;0;0;0;0;-38070;-38070
chr6	7675351	7676242	892	*	Distal Intergenic	6	7727011	7881961	154951	1	654	uc003mxu.4	-50769	ENSG00000153162	BMP6	bone morphogenetic protein 6	NA	NA	NA
chr6	10724971	10726053	1083	*	Promoter (1-2kb)	6	10723148	10731362	8215	1	51522	uc021ylj.1	1823	ENSG00000111843	TMEM14C	transmembrane protein 14C	uc011dim.1;uc003mzf.4;uc011dij.2;uc011dik.2;uc011dil.2;uc010jot.3;uc010jou.3;uc003mzm.3;uc021ylk.1;uc021yll.1;uc010joq.2;uc003mzh.3;uc021ylj.1;uc003mzg.3;uc003mzk.4;uc010jor.3;uc010jos.1	221711;347744;347744;347744;347744;4117;4117;4117;4117;4117;51522;51522;51522;55003;81853;81853;81853	0;-30132;-30132;-30132;-29941;0;0;0;0;0;0;0;0;29783;-21942;-21942;0
chr6	10726697	10727379	683	*	Intron (uc010joq.2/51522, intron 4 of 4)	6	10723148	10731362	8215	1	51522	uc021ylj.1	3549	ENSG00000111843	TMEM14C	transmembrane protein 14C	uc011dim.1;uc003mzf.4;uc011dij.2;uc011dik.2;uc011dil.2;uc010jot.3;uc010jou.3;uc003mzm.3;uc021ylk.1;uc021yll.1;uc010joq.2;uc003mzh.3;uc021ylj.1;uc003mzg.3;uc003mzk.4;uc010jor.3;uc010jos.1	221711;347744;347744;347744;347744;4117;4117;4117;4117;4117;51522;51522;51522;55003;81853;81853;81853	0;-31858;-31858;-31858;-31667;0;0;0;0;0;0;0;0;31509;-20616;-20616;0
chr6	10771380	10772375	996	*	Intron (uc010jos.1/81853, intron 4 of 4)	6	10747995	10852986	104992	1	81853	uc010jos.1	23385	ENSG00000137210	TMEM14B	transmembrane protein 14B	uc011dim.1;uc010jot.3;uc010jou.3;uc003mzm.3;uc021ylk.1;uc021yll.1;uc010jov.2;uc021ylm.1;uc010joq.2;uc003mzh.3;uc021ylj.1;uc003mzk.4;uc010jor.3;uc010jos.1	221711;4117;4117;4117;4117;4117;4117;4117;51522;51522;51522;81853;81853;81853	0;0;0;0;0;0;66413;58735;0;0;0;23385;23385;0
chr6	13274089	13274792	704	*	3' UTR	6	13279527	13295818	16292	2	100130357	uc003nak.1	21026	ENSG00000215022	LOC100130357	uncharacterized LOC100130357	uc003nak.1;uc011dir.2;uc003nah.2;uc010jpc.3;uc003nag.2;uc003naj.3;uc011dis.2;uc003nal.3;uc003nam.3;uc003nan.3;uc003nao.3;uc010jpd.4;uc003naq.3	100130357;221692;221692;221692;221692;51256;51256;51256;51256;51256;51256;51256;51256	21026;557052;0;0;0;0;53995;53995;53995;53995;53995;53995;53995
chr6	13334743	13335634	892	*	Distal Intergenic	6	13318946	13328787	9842	2	51256	uc003naq.3	-5956	ENSG00000145979	TBC1D7	TBC1 domain family member 7	uc003nak.1;uc003nah.2;uc010jpc.3;uc003naj.3;uc011dis.2;uc003nal.3;uc003nam.3;uc003nan.3;uc003nao.3;uc010jpd.4;uc003naq.3;uc021ylt.1;uc003nas.2;uc003nat.2	100130357;221692;221692;51256;51256;51256;51256;51256;51256;51256;51256;54438;54438;54438	-38925;0;0;0;-5956;-5956;-5956;-5956;-5956;-5956;-5956;0;0;0
chr6	13407809	13408783	975	*	Promoter (<=1kb)	6	13363587	13408369	44783	2	54438	uc021ylt.1	0	ENSG00000145990	GFOD1	Gfo/Idh/MocA-like oxidoreductase domain containing 1	uc021ylt.1;uc003nas.2;uc003nat.2	54438;54438;54438	0;0;0
chr6	13678010	13679517	1508	*	Intron (uc003nba.3/10048, intron 1 of 11)	6	13621730	13697128	75399	2	10048	uc003nba.3	17611	ENSG00000010017	RANBP9	RAN binding protein 9	uc003nba.3;uc003nbb.3	10048;10048	0;0
chr6	15036764	15037632	869	*	Distal Intergenic	6	15245734	15497401	251668	1	3720	uc011diu.1	-208102	ENSG00000008083	JARID2	jumonji and AT-rich interaction domain containing 2	NA	NA	NA
chr6	15079271	15080225	955	*	Distal Intergenic	6	15245734	15497401	251668	1	3720	uc011diu.1	-165509	ENSG00000008083	JARID2	jumonji and AT-rich interaction domain containing 2	NA	NA	NA
chr6	15106627	15107917	1291	*	Distal Intergenic	6	15245734	15497401	251668	1	3720	uc011diu.1	-137817	ENSG00000008083	JARID2	jumonji and AT-rich interaction domain containing 2	NA	NA	NA
chr6	15905741	15906615	875	*	Distal Intergenic	6	16129317	16148478	19162	1	29116	uc003nbq.3	-222702	ENSG00000007944	MYLIP	myosin regulatory light chain interacting protein	NA	NA	NA
chr6	15915422	15916950	1529	*	Distal Intergenic	6	16129317	16148478	19162	1	29116	uc003nbq.3	-212367	ENSG00000007944	MYLIP	myosin regulatory light chain interacting protein	NA	NA	NA
chr6	16031226	16032132	907	*	Distal Intergenic	6	16129317	16148478	19162	1	29116	uc003nbq.3	-97185	ENSG00000007944	MYLIP	myosin regulatory light chain interacting protein	NA	NA	NA
chr6	16131056	16131807	752	*	Promoter (1-2kb)	6	16129317	16148478	19162	1	29116	uc003nbr.3	1739	ENSG00000007944	MYLIP	myosin regulatory light chain interacting protein	uc021ymb.2;uc003nbq.3;uc003nbr.3	100616269;29116;29116	-9980;0;0
chr6	16236757	16237529	773	*	Promoter (1-2kb)	6	16238811	16295780	56970	1	2766	uc003nbs.3	-1282	ENSG00000137198	GMPR	guanosine monophosphate reductase	uc003nbs.3	2766	0
chr6	16238214	16238811	598	*	Promoter (<=1kb)	6	16238811	16295780	56970	1	2766	uc003nbs.3	0	ENSG00000137198	GMPR	guanosine monophosphate reductase	uc003nbs.3	2766	0
chr6	16267540	16268546	1007	*	Intron (uc003nbs.3/2766, intron 4 of 8)	6	16238811	16295780	56970	1	2766	uc003nbs.3	28729	ENSG00000137198	GMPR	guanosine monophosphate reductase	uc003nbs.3;uc003nbt.3;uc010jpi.3;uc010jpj.1	2766;6310;6310;6310	0;493175;493175;485032
chr6	16270074	16271248	1175	*	Intron (uc003nbs.3/2766, intron 4 of 8)	6	16238811	16295780	56970	1	2766	uc003nbs.3	31263	ENSG00000137198	GMPR	guanosine monophosphate reductase	uc003nbs.3;uc003nbt.3;uc010jpi.3;uc010jpj.1	2766;6310;6310;6310	0;490473;490473;482330
chr6	17662645	17664136	1492	*	Intron (uc003ncd.2/9972, intron 9 of 21)	6	17615266	17707065	91800	2	9972	uc003ncd.2	42929	ENSG00000124789	NUP153	nucleoporin 153	uc003ncd.2;uc010jpl.2;uc011dje.2	9972;9972;9972	0;0;0
chr6	19968074	19969282	1209	*	Distal Intergenic	6	19837601	19842431	4831	1	3400	uc003ncw.4	130473	ENSG00000172201	ID4	inhibitor of DNA binding 4	NA	NA	NA
chr6	24451726	24452719	994	*	Intron (uc003ned.2/2822, intron 14 of 24)	6	24447759	24476506	28748	2	2822	uc010jpr.1	23787	ENSG00000112293	GPLD1	glycosylphosphatidylinositol specific phospholipase D1	uc003ned.2;uc010jpr.1;uc010jps.1;uc003nee.4;uc003nea.3;uc003neb.3;uc011djl.2;uc011djm.2;uc011djn.2;uc003nef.3;uc003neg.3	2822;2822;2822;2822;57380;57380;57380;57380;57380;7915;7915	0;0;0;37131;48573;48573;48573;48573;48573;-42478;-42478
chr6	26025688	26027693	2006	*	Promoter (<=1kb)	6	26027124	26027480	357	2	8366	uc003nfr.3	0	ENSG00000278705	H4C2	H4 clustered histone 2	uc003nfm.4;uc010jqd.4;uc003nfw.3;uc003nfu.3;uc003nfo.3;uc003nft.1;uc003nfp.1;uc003nfv.3;uc003nfs.1;uc003nfq.3;uc003nfr.3	10475;10475;3006;3018;3024;8335;8350;8352;8358;8359;8366	62771;52287;29006;16192;-7648;6103;4970;-17946;4595;3781;0
chr6	26025688	26027693	2006	*	Promoter (<=1kb)	6	26027124	26027480	357	2	8366	uc003nfr.3	0	ENSG00000278705	H4C2	H4 clustered histone 2	uc003nfm.4;uc010jqd.4;uc003nfw.3;uc003nfu.3;uc003nfo.3;uc003nft.1;uc003nfp.1;uc003nfv.3;uc003nfs.1;uc003nfq.3;uc003nfr.3	10475;10475;3006;3018;3024;8335;8350;8352;8358;8359;8366	62771;52287;29006;16192;-7648;6103;4970;-17946;4595;3781;0
chr6	26188212	26189483	1272	*	Promoter (<=1kb)	6	26188938	26189304	367	2	8360	uc003ngu.3	0	ENSG00000277157	H4C4	H4 clustered histone 4	uc003nhd.3;uc003ngq.3;uc003nha.1;uc003ngw.4;uc003ngr.3;uc003ngs.3;uc003ngz.2;uc003ngx.3;uc003ngt.3;uc003ngv.4;uc003nhc.4;uc003ngu.3;uc003ngy.3	3007;3008;3012;3013;3017;3017;8339;8343;8344;8351;8353;8360;8367	45733;31653;-27665;10038;29863;29863;27389;-10304;4188;10038;-35900;0;-15390
chr6	26295848	26296892	1045	*	Distal Intergenic	6	26285354	26285727	374	2	8365	uc003nhm.2	-10121	ENSG00000158406	H4C8	H4 clustered histone 8	uc003nhh.3;uc003nhk.3;uc003nhi.3;uc003nhm.2;uc003nhf.3;uc003nhg.1	8345;8346;8355;8365;8369;8968	43969;22644;-24236;-10121;-48643;-45013
chr6	26330951	26332731	1781	*	Exon (uc021yng.1/uc021yng.1, exon 1 of 1)	6	26365398	26378540	13143	1	11118	uc010jqh.2	-32667	ENSG00000186470	BTN3A2	butyrophilin subfamily 3 member A2	uc010jqh.2;uc003nhp.3;uc011dkd.2;uc011dke.2;uc010jqi.2;uc003nhm.2	11118;11118;11118;11118;11118;8365	-32667;-32667;-32667;-32667;-35675;-45224
chr6	27106071	27107227	1157	*	Promoter (<=1kb)	6	27107088	27107457	370	1	8294	uc003niy.1	0	ENSG00000276180	H4C9	H4 clustered histone 9	uc021yoz.1;uc003niy.1;uc003niz.4;uc003nix.2;uc003niw.3;uc003niv.3	100422934;8294;85235;85236;8969;8970	-8178;0;-7634;0;5254;-5496
chr6	27600717	27601575	859	*	Distal Intergenic	6	27661814	27678001	16188	1	100507173	uc021yrb.1	-60239	ENSG00000281706	LINC01012	long intergenic non-protein coding RNA 1012	NA	NA	NA
chr6	27841300	27841924	625	*	Promoter (<=1kb)	6	27840926	27841289	364	2	8368	uc003njz.3	-11	ENSG00000275126	H4C13	H4 clustered histone 13	uc003njx.3;uc011dkw.2;uc003njs.3;uc003njw.3;uc003nkb.1;uc003njv.3;uc003nkc.1;uc003njy.3;uc003nka.3;uc003njr.3;uc003njp.3;uc003njz.3	3009;81697;8330;8332;8336;8341;8348;8354;8356;8362;8363;8368	-5941;38250;-35183;8193;19039;34860;-19279;-1201;16646;-41995;49397;-11
chr6	28089758	28090609	852	*	Promoter (1-2kb)	6	28092387	28095331	2945	1	80345	uc011dky.1	-1778	ENSG00000196812	ZSCAN16	zinc finger and SCAN domain containing 16	uc010jqw.2;uc003nkk.2;uc003nkl.2;uc003nkj.5;uc021yrq.2;uc021yro.1;uc003nkh.3;uc003nki.4;uc003nkn.2;uc010jqx.2;uc010jqy.2;uc011dkz.2;uc011dky.1;uc003nkm.3	100129195;100129195;100129195;221584;651302;7718;7718;7718;7745;7745;7745;7745;80345;80345	0;0;0;31173;-38930;41276;40793;40735;-19079;-19079;-19079;-19380;-1778;-1778
chr6	28302488	28304368	1881	*	Promoter (<=1kb)	6	28292515	28303911	11397	2	64288	uc003nla.3	0	ENSG00000235109	ZSCAN31	zinc finger and SCAN domain containing 31	uc003nla.3;uc003nlb.3;uc003nlc.3;uc010jrb.3;uc021yrs.1;uc021yrt.1;uc003nld.3;uc010jra.3;uc003nle.4;uc003nlf.4;uc010jrc.3;uc003nky.3;uc003nkz.3;uc010jre.3	64288;64288;64288;64288;64288;64288;64288;64288;80317;80317;80317;84547;84547;9753	0;0;0;0;0;0;0;0;-13323;-13323;-13323;53174;53174;63176
chr6	34528232	34528776	545	*	Distal Intergenic	6	34505579	34524110	18532	2	25803	uc011dsq.2	-4122	ENSG00000124664	SPDEF	SAM pointed domain containing ETS transcription factor	uc003ojq.2;uc011dsq.2;uc003ojo.4;uc003ojp.4;uc003ojr.2;uc003ojs.2	25803;25803;29993;29993;64771;64771	-4122;-4122;94394;45583;135849;135849
chr6	34530329	34531533	1205	*	Distal Intergenic	6	34505579	34524110	18532	2	25803	uc011dsq.2	-6219	ENSG00000124664	SPDEF	SAM pointed domain containing ETS transcription factor	uc003ojq.2;uc011dsq.2;uc003ojo.4;uc003ojp.4;uc003ojr.2;uc003ojs.2	25803;25803;29993;29993;64771;64771	-6219;-6219;96491;47680;133092;133092
chr6	35694067	35694450	384	*	Promoter (1-2kb)	6	35541362	35696397	155036	2	2289	uc003oky.2	1947	ENSG00000096060	FKBP5	FKBP prolyl isomerase 5	uc003ola.3;uc003olb.1;uc011dte.1;uc003okx.2;uc011dtf.1;uc003oky.2;uc003okz.2;uc010jvy.2;uc003olc.1;uc010jvz.1	221481;221481;2289;2289;2289;2289;2289;285847;389383;389383	-10409;-10409;-37375;-37348;-37348;0;-37348;0;-49942;-49942
chr6	35695701	35696074	374	*	Promoter (<=1kb)	6	35541362	35696397	155036	2	2289	uc003oky.2	323	ENSG00000096060	FKBP5	FKBP prolyl isomerase 5	uc003ola.3;uc003olb.1;uc011dte.1;uc003okx.2;uc011dtf.1;uc003oky.2;uc003okz.2;uc010jvy.2;uc003olc.1;uc010jvz.1	221481;221481;2289;2289;2289;2289;2289;285847;389383;389383	-8785;-8785;-39009;-38982;-38982;0;-38982;0;-48318;-48318
chr6	36085873	36086956	1084	*	Distal Intergenic	6	36098261	36112301	14041	1	5603	uc003ols.4	-11305	ENSG00000156711	MAPK13	mitogen-activated protein kinase 13	uc011dth.2;uc003olo.3;uc003olp.3;uc003olq.3;uc003olr.3;uc011dti.2;uc003ols.4;uc003olt.4	1432;1432;1432;1432;1432;1432;5603;5603	90419;90419;90419;90419;90419;90289;-11305;-11305
chr6	36856602	36857445	844	*	Intron (uc003omv.3/221477, intron 3 of 9)	6	36853640	36896740	43101	1	221477	uc011dtr.2	2962	ENSG00000198663	C6orf89	chromosome 6 open reading frame 89	uc003omv.3;uc003omw.3;uc003omx.3;uc011dtr.2;uc003omu.2;uc003omr.1	221477;221477;221477;221477;51645;57699	0;0;0;0;-13802;-49382
chr6	36943593	36944087	495	*	Intron (uc003onc.2/23787, intron 6 of 11)	6	36935911	36954327	18417	2	23787	uc003onc.2	10240	ENSG00000137409	MTCH1	mitochondrial carrier 1	uc003onf.3;uc011dtu.1;uc003ong.2;uc010jwp.1;uc011dtv.1;uc003oni.1;uc003onj.1;uc021yzd.1;uc003omz.1;uc003ona.3;uc011dts.1;uc003omv.3;uc003omw.3;uc003omx.3;uc011dtr.2;uc003onc.2;uc003ond.2;uc010jwo.2;uc003one.5;uc011dtt.3	221472;221472;221472;221472;221472;221472;221472;221476;221476;221476;221476;221477;221477;221477;221477;23787;23787;23787;23787;23787	-29336;-29336;-29336;-29336;-29336;-36714;-45231;27554;21384;21384;14366;0;0;0;0;0;0;0;0;0
chr6	37017987	37019471	1485	*	Distal Intergenic	6	36989318	36996391	7074	1	221472	uc003onj.1	28669	ENSG00000146192	FGD2	FYVE, RhoGEF and PH domain containing 2	uc003onf.3;uc011dtu.1;uc003ong.2;uc010jwp.1;uc011dtv.1;uc003oni.1;uc003onj.1	221472;221472;221472;221472;221472;221472;221472	44564;44564;44564;44564;44564;37186;28669
chr6	37017987	37019471	1485	*	Distal Intergenic	6	36989318	36996391	7074	1	221472	uc003onj.1	28669	ENSG00000146192	FGD2	FYVE, RhoGEF and PH domain containing 2	uc003onf.3;uc011dtu.1;uc003ong.2;uc010jwp.1;uc011dtv.1;uc003oni.1;uc003onj.1	221472;221472;221472;221472;221472;221472;221472	44564;44564;44564;44564;44564;37186;28669
chr6	37070689	37071770	1082	*	Distal Intergenic	6	37137922	37143204	5283	1	5292	uc003onk.3	-66152	ENSG00000137193	PIM1	Pim-1 proto-oncogene, serine/threonine kinase	NA	NA	NA
chr6	37077372	37078616	1245	*	Distal Intergenic	6	37137922	37143204	5283	1	5292	uc003onk.3	-59306	ENSG00000137193	PIM1	Pim-1 proto-oncogene, serine/threonine kinase	NA	NA	NA
chr6	37150785	37151450	666	*	Distal Intergenic	6	37140233	37143204	2972	1	5292	uc011dtw.2	10552	ENSG00000137193	PIM1	Pim-1 proto-oncogene, serine/threonine kinase	uc003onl.3;uc010jwr.3;uc010jws.3;uc003onm.4;uc003onk.3;uc011dtw.2	221468;221468;221468;221468;5292;5292	73963;73963;73963;74481;12863;10552
chr6	37159268	37160155	888	*	Distal Intergenic	6	37140233	37143204	2972	1	5292	uc011dtw.2	19035	ENSG00000137193	PIM1	Pim-1 proto-oncogene, serine/threonine kinase	uc003onl.3;uc010jwr.3;uc010jws.3;uc003onm.4;uc003onk.3;uc011dtw.2	221468;221468;221468;221468;5292;5292	65258;65258;65258;65776;21346;19035
chr6	37282305	37283216	912	*	Intron (uc003onn.3/55633, intron 10 of 12)	6	37273650	37300746	27097	1	55633	uc003onp.3	8655	ENSG00000065491	TBC1D22B	TBC1 domain family member 22B	uc003onn.3;uc010jwt.3;uc003ono.1;uc003onp.3;uc003onq.4;uc003onr.4;uc011dtx.2	55633;55633;55633;55633;9025;9025;9025	0;0;0;0;-38532;-38532;-38532
chr6	37427747	37428594	848	*	Intron (uc010jwu.2/23070, intron 8 of 9)	6	37400907	37449284	48378	1	23070	uc003ons.3	26840	ENSG00000137200	CMTR1	cap methyltransferase 1	uc003ont.3;uc010jwu.2;uc003ons.3	154467;23070;23070	39106;0;0
chr6	39154847	39155825	979	*	Distal Intergenic	6	39156747	39197251	40505	2	8645	uc003oon.3	41426	ENSG00000164626	KCNK5	potassium two pore domain channel subfamily K member 5	uc003oon.3	8645	41426
chr6	40682999	40684158	1160	*	Distal Intergenic	6	40359373	40555126	195754	2	57497	uc003oph.1	-127873	ENSG00000156564	LRFN2	leucine rich repeat and fibronectin type III domain containing 2	NA	NA	NA
chr6	41009734	41010938	1205	*	Promoter (<=1kb)	6	41010237	41012076	1840	1	222642	uc003opj.3	0	ENSG00000112212	TSPO2	translocator protein 2	uc003opl.3;uc010jxf.3;uc003opm.3;uc003opn.3;uc010jxg.3;uc010jxh.1;uc003opj.3;uc003opk.3;uc011dub.2;uc003opi.3;uc010jxe.1;uc003opo.3;uc003opp.3;uc003opq.3;uc031soo.1	10930;10930;221443;221443;221443;221443;222642;222642;222642;222643;222643;4800;4800;4800;4800	-10002;-10002;29250;29330;29330;29330;0;0;0;-2796;0;-29769;-29769;-30023;-35830
chr6	41903781	41904664	884	*	5' UTR	6	41902671	41909144	6474	2	896	uc003orm.3	4480	ENSG00000112576	CCND3	cyclin D3	uc003ori.3;uc003orl.3;uc003orm.3;uc003orn.3;uc003oro.3;uc003orp.3;uc011duk.2;uc011dul.1;uc011dum.1;uc003orj.3;uc003ork.3;uc011duh.2;uc011dui.3;uc011duj.2	25862;705;896;896;896;896;896;896;896;9477;9477;9477;9477;9477	-40682;14816;0;0;0;0;0;0;0;-15100;-14904;-14904;-14904;-14904
chr6	41905803	41906377	575	*	Intron (uc003orm.3/896, intron 2 of 4)	6	41902671	41909144	6474	2	896	uc003orm.3	2767	ENSG00000112576	CCND3	cyclin D3	uc003ori.3;uc003orl.3;uc003orm.3;uc003orn.3;uc003oro.3;uc003orp.3;uc011duk.2;uc011dul.1;uc011dum.1;uc003orj.3;uc003ork.3;uc011duh.2;uc011dui.3;uc011duj.2	25862;705;896;896;896;896;896;896;896;9477;9477;9477;9477;9477	-42704;16838;0;0;0;0;0;0;0;-17122;-16926;-16926;-16926;-16926
chr6	41924294	41925624	1331	*	Intron (uc003orp.3/896, intron 1 of 4)	6	41904522	41909552	5031	2	896	uc011dul.1	-14742	ENSG00000112576	CCND3	cyclin D3	uc003orl.3;uc003orm.3;uc003orn.3;uc003oro.3;uc003orp.3;uc011duk.2;uc011dul.1;uc011dum.1;uc003orj.3;uc003ork.3;uc011duh.2;uc011dui.3;uc011duj.2	705;896;896;896;896;896;896;896;9477;9477;9477;9477;9477	35329;0;0;0;0;0;0;0;-35613;-35417;-35417;-35417;-35417
chr6	41984558	41985531	974	*	Intron (uc003orp.3/896, intron 1 of 4)	6	41902671	42016610	113940	2	896	uc003orp.3	31079	ENSG00000112576	CCND3	cyclin D3	uc003orr.3;uc003ors.3;uc003ort.3;uc003oru.1;uc003orv.1;uc011dun.2;uc003orp.3;uc011duk.2;uc011dum.1	129685;129685;129685;129685;129685;129685;896;896;896	-32720;-32720;-32720;-32720;-32720;-33127;0;0;0
chr6	41998352	41999281	930	*	Intron (uc003orp.3/896, intron 1 of 4)	6	41902671	42016610	113940	2	896	uc003orp.3	17329	ENSG00000112576	CCND3	cyclin D3	uc003orr.3;uc003ors.3;uc003ort.3;uc003oru.1;uc003orv.1;uc011dun.2;uc003orp.3;uc011duk.2;uc011dum.1	129685;129685;129685;129685;129685;129685;896;896;896	-18970;-18970;-18970;-18970;-18970;-19377;0;0;0
chr6	42013194	42013824	631	*	Intron (uc003orp.3/896, intron 1 of 4)	6	41902671	42016610	113940	2	896	uc003orp.3	2786	ENSG00000112576	CCND3	cyclin D3	uc003orr.3;uc003ors.3;uc003ort.3;uc003oru.1;uc003orv.1;uc011dun.2;uc003orp.3;uc011duk.2;uc011dum.1	129685;129685;129685;129685;129685;129685;896;896;896	-4427;-4427;-4427;-4427;-4427;-4834;0;0;0
chr6	42059414	42060644	1231	*	Distal Intergenic	6	42018658	42048644	29987	1	129685	uc011dun.2	40756	ENSG00000137413	TAF8	TATA-box binding protein associated factor 8	uc003orr.3;uc003ors.3;uc003ort.3;uc003oru.1;uc003orv.1;uc011dun.2;uc003orw.2;uc003orp.3;uc011duk.2;uc011dum.1	129685;129685;129685;129685;129685;129685;647024;896;896;896	41163;41163;41163;41163;41163;40756;50071;0;0;0
chr6	42164992	42166241	1250	*	Distal Intergenic	6	42151022	42162694	11673	2	2979	uc003orz.3	-2298	ENSG00000112599	GUCA1B	guanylate cyclase activator 1B	uc003orx.3;uc010jxt.3;uc011duo.3;uc003orz.3;uc003osa.4;uc011dup.2;uc011duq.1;uc003osb.2;uc003osc.2;uc003osd.2;uc003ose.2	2978;2978;2978;2979;55173;55173;55809;55809;55809;55809;55809	41848;41848;41848;-2298;19392;19392;71345;252758;252758;253542;253542
chr6	43692806	43693288	483	*	Distal Intergenic	6	43645542	43655549	10008	2	55168	uc010jyw.3	-37257	ENSG00000096080	MRPS18A	mitochondrial ribosomal protein S18A	uc003ovy.2;uc003ovz.2;uc003owa.2;uc010jyw.3;uc003owb.3;uc003owd.3;uc003owe.3;uc003owf.3;uc003owg.3;uc003owh.3;uc003owi.3;uc003owj.3;uc010jyx.3;uc021yzu.1	55168;55168;55168;55168;7422;7422;7422;7422;7422;7422;7422;7422;7422;7422	-37257;-37257;-37257;-37257;-44658;-44658;-44658;-44658;-44658;-44658;-44658;-44658;-44658;-44658
chr6	43706508	43708140	1633	*	Distal Intergenic	6	43737946	43745562	7617	1	7422	uc003owb.3	-29806	ENSG00000112715	VEGFA	vascular endothelial growth factor A	uc003owb.3;uc003owd.3;uc003owe.3;uc003owf.3;uc003owg.3;uc003owh.3;uc003owi.3;uc003owj.3;uc010jyx.3;uc021yzu.1;uc003owk.3	7422;7422;7422;7422;7422;7422;7422;7422;7422;7422;7422	-29806;-29806;-29806;-29806;-29806;-29806;-29806;-29806;-29806;-29806;-37320
chr6	44026052	44026879	828	*	Intron (uc003owm.1/uc003owm.1, intron 1 of 4)	6	43968337	43973694	5358	1	221416	uc003owo.3	57715	ENSG00000181577	LINC03040	long intergenic non-protein coding RNA 3040	NA	NA	NA
chr6	44097631	44098310	680	*	Intron (uc003owq.1/55362, intron 1 of 14)	6	44095457	44108250	12794	1	55362	uc010jyy.1	2174	ENSG00000137216	TMEM63B	transmembrane protein 63B	uc003owt.1;uc011dvn.2;uc003owq.1;uc003owr.3;uc010jyy.1;uc003ows.3;uc010jyz.3;uc003owp.3	11131;11131;55362;55362;55362;55362;55362;64928	-28238;-46008;0;0;0;-4444;-9135;-2440
chr6	44101536	44102523	988	*	Promoter (<=1kb)	6	44102754	44123256	20503	1	55362	uc003ows.3	-231	ENSG00000137216	TMEM63B	transmembrane protein 63B	uc003owt.1;uc011dvn.2;uc003owq.1;uc003owr.3;uc010jyy.1;uc003ows.3;uc010jyz.3;uc003owp.3	11131;11131;55362;55362;55362;55362;55362;64928	-24025;-41795;0;0;0;-231;-4922;-6345
chr6	44193261	44194343	1083	*	Promoter (1-2kb)	6	44191637	44197528	5892	1	2030	uc021yzx.1	1624	ENSG00000112759	SLC29A1	solute carrier family 29 member 1 (Augustine blood group)	uc021yzy.1;uc003owt.1;uc011dvn.2;uc021yzw.1;uc011dvp.1;uc003owu.1;uc003owv.1;uc003oww.1;uc011dvq.2;uc003owx.2;uc003owy.2;uc003owz.1;uc021yzx.1;uc003oxg.3;uc031sor.1;uc003oxa.2;uc003oxb.2;uc011dvr.2;uc011dvs.2;uc003oxc.2;uc003oxd.3;uc011dvt.2;uc011dvu.2;uc003oxh.2;uc003oxf.2;uc003oxe.1	100616124;11131;11131;2030;2030;2030;2030;2030;2030;2030;2030;2030;2030;221409;3326;3326;3326;3326;3326;3326;347734;347734;347734;441151;441151;4794	27679;66713;48943;0;0;0;0;0;0;0;0;0;0;-46460;-19560;-20352;-20352;-20352;-20352;-23405;30940;30940;30940;-44137;-44137;39182
chr6	49303878	49305226	1349	*	Distal Intergenic	6	49398073	49431041	32969	2	4594	uc003ozg.4	125815	ENSG00000146085	MMUT	methylmalonyl-CoA mutase	NA	NA	NA
chr6	49613157	49614794	1638	*	Distal Intergenic	6	49572890	49604587	31698	2	6005	uc010jzm.3	-8570	ENSG00000112077	RHAG	Rh associated glycoprotein	uc003ozk.4;uc010jzl.3;uc010jzm.3;uc003ozl.3;uc003ozm.3;uc003ozn.3;uc003ozo.3;uc003ozp.3;uc003ozq.3;uc003ozr.3;uc031sou.1	6005;6005;6005;7180;7180;7180;7180;7180;7180;7180;7180	-8570;-8570;-8570;66509;66509;66509;66509;66509;66509;66509;66509
chr6	49613157	49614794	1638	*	Distal Intergenic	6	49572890	49604587	31698	2	6005	uc010jzm.3	-8570	ENSG00000112077	RHAG	Rh associated glycoprotein	uc003ozk.4;uc010jzl.3;uc010jzm.3;uc003ozl.3;uc003ozm.3;uc003ozn.3;uc003ozo.3;uc003ozp.3;uc003ozq.3;uc003ozr.3;uc031sou.1	6005;6005;6005;7180;7180;7180;7180;7180;7180;7180;7180	-8570;-8570;-8570;66509;66509;66509;66509;66509;66509;66509;66509
chr6	49807382	49810105	2724	*	Exon (uc003ozw.2/167, exon 6 of 8)	6	49801979	49834218	32240	2	167	uc003ozw.2	24113	ENSG00000124812	CRISP1	cysteine rich secretory protein 1	uc003ozw.2;uc003ozx.2;uc021zaj.1	167;167;167	0;0;0
chr6	49807382	49810105	2724	*	Exon (uc003ozw.2/167, exon 6 of 8)	6	49801979	49834218	32240	2	167	uc003ozw.2	24113	ENSG00000124812	CRISP1	cysteine rich secretory protein 1	uc003ozw.2;uc003ozx.2;uc021zaj.1	167;167;167	0;0;0
chr6	73270318	73271470	1153	*	Distal Intergenic	6	73331571	73834372	502802	1	56479	uc003pgj.4	-60101	ENSG00000185760	KCNQ5	potassium voltage-gated channel subfamily Q member 5	NA	NA	NA
chr6	74132173	74132624	452	*	Distal Intergenic	6	74078280	74104816	26537	2	441161	uc003pgv.4	-27357	ENSG00000203907	OOEP	oocyte expressed protein	uc003pgx.1;uc003pgy.4;uc003pgz.4;uc003pha.4;uc010kav.3;uc003phb.4;uc003phc.1;uc003pgv.4;uc011dyn.1;uc003pgw.3	115004;25821;25821;25821;25821;25821;25821;441161;55510;55510	29419;-38830;-38830;-38830;-38830;-38868;-39183;-27357;27888;27888
chr6	78050678	78051555	878	*	Distal Intergenic	6	78171948	78173120	1173	2	3351	uc003pil.1	121565	ENSG00000135312	HTR1B	5-hydroxytryptamine receptor 1B	NA	NA	NA
chr6	79979008	79980554	1547	*	Distal Intergenic	6	79910962	79944455	33494	2	9324	uc021zbz.1	-34553	ENSG00000118418	HMGN3	high mobility group nucleosomal binding domain 3	uc003piv.2;uc003pis.3;uc003pit.3;uc003piu.2;uc021zbz.1	100288198;9324;9324;9324;9324	35617;-34553;-34553;-34553;-34553
chr6	82915701	82916332	632	*	Promoter (<=1kb)	6	82879956	82915646	35691	2	25998	uc011dyu.1	-55	ENSG00000005700	IBTK	inhibitor of Bruton tyrosine kinase	uc011dyu.1;uc011dyv.1;uc011dyw.1;uc003pjl.1;uc010kbi.1;uc003pjm.2	25998;25998;25998;25998;25998;25998	-55;0;0;0;0;0
chr6	84683969	84685154	1186	*	Distal Intergenic	6	84743420	84800605	57186	1	112609	uc003pkg.4	-58266	ENSG00000135324	MRAP2	melanocortin 2 receptor accessory protein 2	uc003pkf.3	51167	114599
chr6	84796593	84797527	935	*	Intron (uc003pkg.4/112609, intron 3 of 3)	6	84743420	84800605	57186	1	112609	uc010kbo.3	53173	ENSG00000135324	MRAP2	melanocortin 2 receptor accessory protein 2	uc003pkg.4;uc010kbo.3;uc003pki.4;uc003pkj.4;uc010kbp.3	112609;112609;22832;22832;22832	0;0;107266;139808;139808
chr6	90492589	90493719	1131	*	Promoter (1-2kb)	6	90460669	90494845	34177	2	23195	uc003pno.1	1126	ENSG00000112159	MDN1	midasin AAA ATPase 1	uc003pnn.1;uc003pno.1;uc003pnp.1;uc003pns.2;uc003pnr.3;uc003pnt.3;uc011dzz.2	23195;23195;23195;9994;9994;9994;9994	0;0;0;-45900;-45900;-45900;-45900
chr6	106936139	106937092	954	*	Distal Intergenic	6	106959305	107018334	59030	1	202	uc003prh.3	-22213	ENSG00000112297	CRYBG1	crystallin beta-gamma domain containing 1	uc003prh.3	202	-22213
chr6	108883553	108884582	1030	*	Promoter (1-2kb)	6	108882069	109005971	123903	1	2309	uc003psm.2	1484	ENSG00000118689	FOXO3	forkhead box O3	uc003psk.2;uc003psm.2;uc011ean.1;uc003psj.3	2309;2309;2309;246269	0;0;0;267455
chr6	108919384	108919910	527	*	Intron (uc003psk.2/2309, intron 2 of 3)	6	108910909	109005971	95063	1	2309	uc011ean.1	8475	ENSG00000118689	FOXO3	forkhead box O3	uc003psk.2;uc003psm.2;uc011ean.1	2309;2309;2309	0;0;0
chr6	109624980	109626376	1397	*	Intron (uc003ptb.1/221262, intron 3 of 4)	6	109615506	109629423	13918	1	221262	uc010kdm.1	9474	ENSG00000203799	CCDC162P	coiled-coil domain containing 162, pseudogene	uc003pta.2;uc003ptb.1;uc010kdm.1	100996634;221262;221262	67163;0;0
chr6	112972301	112973394	1094	*	Distal Intergenic	6	112668532	112672498	3967	1	442247	uc003pvx.1	303769	ENSG00000251258	RFPL4B	ret finger protein like 4B	NA	NA	NA
chr6	119458017	119458997	981	*	Intron (uc003pyk.4/79632, intron 1 of 16)	6	119280996	119470358	189363	2	79632	uc003pyk.4	11361	ENSG00000111879	FAM184A	family with sequence similarity 184 member A	uc003pym.2;uc003pyk.4;uc003pyl.4	4121;79632;79632	211934;0;0
chr6	126110681	126111383	703	*	Promoter (<=1kb)	6	126111909	126205465	93557	1	135112	uc003qaf.3	-526	ENSG00000111912	NCOA7	nuclear receptor coactivator 7	uc003qae.4;uc010kes.3;uc003qaf.3;uc003qag.3;uc003qah.3;uc003qai.3;uc010ket.3;uc003qaj.3;uc011ebr.2;uc003qad.3	135112;135112;135112;135112;135112;135112;135112;135112;23493;23493	0;0;-526;-526;-526;-526;-526;-24981;41901;39949
chr6	129828556	129830206	1651	*	Exon (uc003qbn.3/3908, exon 61 of 64)	6	129898240	130031370	133131	2	93663	uc003qbr.3	201164	ENSG00000146376	ARHGAP18	Rho GTPase activating protein 18	uc003qbn.3;uc003qbo.3;uc021zfb.1	3908;3908;3908	0;0;0
chr6	133098882	133099624	743	*	Promoter (<=1kb)	6	133090507	133100543	10037	2	116843	uc010kgd.1	919	ENSG00000146409	SLC18B1	solute carrier family 18 member B1	uc010kgd.1;uc003qdw.1;uc011eco.1;uc010kfs.3;uc010kfu.3;uc010kfv.3;uc010kfw.3;uc010kfx.3;uc010kfy.3;uc011ecl.2;uc011ecm.2;uc011ecn.3;uc010kfz.3;uc003qdy.1;uc003qdx.3;uc003qds.3;uc003qdt.3;uc010kgb.3;uc031sps.1;uc031spt.1;uc003qdv.3	116843;116843;116843;55350;55350;55350;55350;55350;55350;55350;55350;55350;55350;594839;6206;8875;8875;8875;8875;8875;8875	0;0;0;-43051;-42978;-42978;-42978;-42978;-42978;-42978;-42978;-42978;-42978;-36822;-36084;-19984;-19849;-19849;-19849;-19849;-14284
chr6	135375401	135376911	1511	*	Promoter (<=1kb)	6	135281517	135376036	94520	2	10767	uc003qez.2	0	ENSG00000112339	HBS1L	HBS1 like translational GTPase	uc003qey.2;uc011ecy.1;uc011ecz.1;uc003qez.2;uc011eda.1;uc003qfa.2	10767;10767;10767;10767;10767;10767	-27109;-3616;-3616;0;0;0
chr6	135512432	135514229	1798	*	5' UTR	6	135516886	135518461	1576	1	4602	uc003qge.1	-2657	ENSG00000118513	MYB	MYB proto-oncogene, transcription factor	uc003qfb.1;uc003qfc.3;uc003qfd.3;uc003qfe.3;uc003qff.3;uc003qfg.3;uc003qfh.3;uc003qfi.3;uc003qfj.3;uc003qfk.3;uc003qfl.3;uc003qfm.3;uc003qfn.3;uc003qfo.3;uc003qfp.3;uc003qfq.3;uc003qfr.3;uc003qfs.3;uc003qft.3;uc003qfu.3;uc003qfv.3;uc003qfw.3;uc003qfx.3;uc003qfy.3;uc003qfz.3;uc003qga.3;uc003qgb.3;uc010kgi.3;uc010kgj.3;uc010kgk.3;uc003qgc.3;uc003qgd.1;uc003qge.1	4602;4602;4602;4602;4602;4602;4602;4602;4602;4602;4602;4602;4602;4602;4602;4602;4602;4602;4602;4602;4602;4602;4602;4602;4602;4602;4602;4602;4602;4602;4602;4602;4602	0;0;0;0;0;0;0;0;0;0;0;0;0;0;0;0;0;0;0;0;0;0;0;0;0;0;0;0;0;0;0;0;-2657
chr6	135643747	135645081	1335	*	Exon (uc003qgf.3/54806, exon 12 of 19)	6	135605110	135763852	158743	2	54806	uc003qgf.3	118771	ENSG00000135541	AHI1	Abelson helper integration site 1	uc003qgf.3;uc003qgg.3;uc003qgh.3;uc003qgi.3;uc003qgj.3;uc003qgk.4	54806;54806;54806;54806;54806;54806	0;0;0;0;0;0
chr6	139766052	139767789	1738	*	Distal Intergenic	6	139790132	139795733	5602	2	645434	uc003qiq.1	27944	ENSG00000238099	LINC01625	long intergenic non-protein coding RNA 1625	uc003qiq.1	645434	27944
chr6	139855078	139856442	1365	*	Distal Intergenic	6	139790132	139795733	5602	2	645434	uc003qiq.1	-59345	ENSG00000238099	LINC01625	long intergenic non-protein coding RNA 1625	NA	NA	NA
chr6	144128464	144129628	1165	*	Intron (uc003qjq.4/9749, intron 12 of 12)	6	144164508	144184943	20436	1	84946	uc003qjs.3	-34880	ENSG00000135521	LTV1	LTV1 ribosome biogenesis factor	uc010khj.3;uc003qjs.3;uc003qju.1;uc003qjq.4;uc010khh.3;uc003qjr.4;uc010khi.3	153918;84946;84946;9749;9749;9749;9749	-48812;-34880;-47464;0;0;0;0
chr6	150038617	150040204	1588	*	Promoter (<=1kb)	6	149979289	150039392	60104	2	9113	uc003qmu.2	0	ENSG00000131023	LATS1	large tumor suppressor kinase 1	uc003qmx.4;uc003qmz.3;uc011eef.1;uc003qna.3;uc003qnb.3;uc003qnd.3;uc003qne.3;uc003qnf.3;uc011eeg.2;uc010kif.2;uc003qmu.2;uc003qmv.2;uc003qmw.3;uc010kig.1	348995;348995;348995;5110;5110;5110;5110;5110;5110;9113;9113;9113;9113;9113	17554;27484;27484;0;0;0;0;0;0;-1056;0;-15215;0;0
chr6	150070877	150071968	1092	*	Promoter (<=1kb)	6	150070831	150132557	61727	1	5110	uc011eeg.2	46	ENSG00000120265	PCMT1	protein-L-isoaspartate (D-aspartate) O-methyltransferase	uc003qmx.4;uc003qmz.3;uc011eef.1;uc003qna.3;uc003qnb.3;uc003qnd.3;uc003qne.3;uc003qnf.3;uc011eeg.2;uc010kif.2;uc003qmu.2;uc003qmv.2;uc003qmw.3;uc010kig.1	348995;348995;348995;5110;5110;5110;5110;5110;5110;9113;9113;9113;9113;9113	-13119;-3189;-3189;0;0;0;0;0;0;-33316;0;-47475;0;0
chr6	157813772	157815133	1362	*	Intron (uc003qqs.3/79683, intron 1 of 8)	6	157802557	158094977	292421	1	79683	uc003qqt.3	11215	ENSG00000175048	ZDHHC14	zinc finger DHHC-type palmitoyltransferase 14	uc003qqs.3;uc003qqt.3	79683;79683	0;0
chr6	157880219	157880819	601	*	Intron (uc003qqs.3/79683, intron 1 of 8)	6	157950164	157950232	69	1	100500899	uc021zhk.1	-69345	ENSG00000266617	MIR3692	microRNA 3692	uc003qqs.3;uc003qqt.3	79683;79683	0;0
chr6	157882166	157883098	933	*	Intron (uc003qqs.3/79683, intron 1 of 8)	6	157950164	157950232	69	1	100500899	uc021zhk.1	-67066	ENSG00000266617	MIR3692	microRNA 3692	uc003qqs.3;uc003qqt.3	79683;79683	0;0
chr6	157909424	157910996	1573	*	Intron (uc003qqs.3/79683, intron 1 of 8)	6	157950164	157950232	69	1	100500899	uc021zhk.1	-39168	ENSG00000266617	MIR3692	microRNA 3692	uc021zhk.1;uc003qqs.3;uc003qqt.3	100500899;79683;79683	-39168;0;0
chr6	157909424	157910996	1573	*	Intron (uc003qqs.3/79683, intron 1 of 8)	6	157950164	157950232	69	1	100500899	uc021zhk.1	-39168	ENSG00000266617	MIR3692	microRNA 3692	uc021zhk.1;uc003qqs.3;uc003qqt.3	100500899;79683;79683	-39168;0;0
chr6	157935715	157936503	789	*	Intron (uc003qqs.3/79683, intron 1 of 8)	6	157950164	157950232	69	1	100500899	uc021zhk.1	-13661	ENSG00000266617	MIR3692	microRNA 3692	uc021zhk.1;uc003qqs.3;uc003qqt.3;uc010kjm.1	100500899;79683;79683;79683	-13661;0;0;-27114
chr6	159183485	159184549	1065	*	Promoter (1-2kb)	6	159185693	159185785	93	2	100500851	uc021zho.1	1236	ENSG00000265558	MIR3918	microRNA 3918	uc021zho.1;uc011efr.2;uc003qrt.4;uc011efs.2;uc003qru.4;uc003qro.3;uc003qrp.3;uc003qrr.3;uc003qrs.3;uc011efq.2	100500851;7430;7430;7430;7430;94120;94120;94120;94120;94120	1236;6455;54791;54791;55907;0;0;0;0;0
chr6	159274107	159274702	596	*	Intron (uc003qrw.4/202459, intron 2 of 2)	6	159262158	159278664	16507	2	202459	uc003qrw.4	3962	ENSG00000293101	OSTCP1	oligosaccharyltransferase complex subunit pseudogene 1	uc021zhp.1;uc031sqs.1;uc003qrw.4;uc003qrt.4;uc011efs.2;uc003qru.4	100130967;101409257;202459;7430;7430;7430	-34917;35096;0;-34767;-34767;-33651
chr6	160992076	160992906	831	*	Intron (uc003qtl.3/4018, intron 29 of 39)	6	160888218	160932156	43939	2	80350	uc011efy.2	-59920	ENSG00000290613	LPAL2	lipoprotein(a) like 2 (pseudogene)	uc003qtl.3	4018	0
chr6	164197804	164199249	1446	*	Distal Intergenic	6	163835675	163999628	163954	1	9444	uc003quj.3	362129	ENSG00000112531	QKI	QKI, KH domain containing RNA binding	NA	NA	NA
chr6	167125591	167126417	827	*	Intron (uc003qvc.1/6196, intron 2 of 21)	6	166822854	167040726	217873	2	6196	uc003qvb.1	-84865	ENSG00000071242	RPS6KA2	ribosomal protein S6 kinase A2	uc003qvc.1;uc003qvd.1	6196;6196	0;0
chr6	167131110	167132564	1455	*	Intron (uc003qvc.1/6196, intron 2 of 21)	6	166822854	167040726	217873	2	6196	uc003qvb.1	-90384	ENSG00000071242	RPS6KA2	ribosomal protein S6 kinase A2	uc003qvc.1;uc003qvd.1	6196;6196	0;0
chr6	167655691	167656584	894	*	Distal Intergenic	6	167704803	167729502	24700	1	54346	uc003qvq.3	-48219	ENSG00000112494	UNC93A	unc-93 homolog A	uc003qvq.3;uc003qvr.3	54346;54346	-48219;-48219
chr7	764975	766398	1424	*	Promoter (<=1kb)	7	766338	826116	59779	1	54919	uc003siz.2	0	ENSG00000164818	DNAAF5	dynein axonemal assembly factor 5	uc003siz.2;uc010krz.1;uc003sja.3;uc003sjb.2;uc003sjc.2;uc031swi.1;uc003siu.2;uc021zyi.1;uc003siv.3;uc021zyj.1;uc003siw.2;uc021zyk.1	54919;54919;54919;54919;54919;5575;5575;5575;5575;5575;5575;5575	0;0;-37045;-41052;-41714;-33547;-12814;-12398;-12131;0;0;0
chr7	1500488	1501647	1160	*	Promoter (1-2kb)	7	1473995	1499109	25115	2	79778	uc003skj.4	-1379	ENSG00000164877	MICALL2	MICAL like 2	uc003skn.2;uc003skp.1;uc003skq.2;uc003ski.4;uc003skj.4	26173;26173;26173;79778;79778	42371;31900;42371;-18368;-1379
chr7	1895712	1896870	1159	*	Intron (uc003sld.1/8379, intron 3 of 3)	7	1883816	1883889	74	2	100616160	uc021zyt.1	-11823	ENSG00000265089	MIR4655	microRNA 4655	uc021zyt.1;uc003sld.1;uc003sle.1;uc003slf.1;uc003slg.1;uc003slh.1;uc003sli.1;uc010ksh.1;uc010ksi.1;uc010ksj.3	100616160;8379;8379;8379;8379;8379;8379;8379;8379;8379	-11823;0;0;0;0;0;0;0;375713;375713
chr7	2810719	2811411	693	*	Intron (uc003smt.3/2768, intron 3 of 4)	7	2767741	2854893	87153	2	2768	uc003smt.3	43482	ENSG00000146535	GNA12	G protein subunit alpha 12	uc003smt.3;uc003smu.3;uc011jwb.2	2768;2768;2768	0;0;0
chr7	4589201	4589837	637	*	Distal Intergenic	7	4683388	4811074	127687	1	221937	uc003sna.1	-93551	ENSG00000164916	FOXK1	forkhead box K1	NA	NA	NA
chr7	4784529	4785046	518	*	Intron (uc003sna.1/221937, intron 5 of 11)	7	4815262	4834026	18765	1	9907	uc003sne.3	-30216	ENSG00000242802	AP5Z1	adaptor related protein complex 5 subunit zeta 1	uc021zzb.1;uc003sna.1;uc003snb.1;uc003snc.1;uc003sng.1;uc003sne.3;uc010ksp.3;uc003snf.3	100616465;221937;221937;221937;55698;9907;9907;9907	43224;0;0;0;138289;-30216;-30216;-42811
chr7	5594115	5595223	1109	*	Distal Intergenic	7	5566779	5570232	3454	2	60	uc003sot.4	-23883	ENSG00000075624	ACTB	actin beta	uc003sor.4;uc003soq.4;uc003sot.4;uc003sou.3;uc003sov.3;uc003son.4;uc003soo.2	60;60;60;6624;6624;80028;80028	-24821;-23883;-23883;0;-47280;-40716;-40716
chr7	5635376	5635823	448	*	Intron (uc003sou.3/6624, intron 1 of 4)	7	5632436	5646287	13852	1	6624	uc003sou.3	2940	ENSG00000075618	FSCN1	fascin actin-bundling protein 1	uc010ksz.2;uc010kta.2;uc003sox.2;uc003soy.2;uc011jwj.2;uc003sou.3;uc003sov.3	54476;54476;54476;54476;54476;6624;6624	164946;164946;185538;185538;185538;0;-6680
chr7	6098617	6099112	496	*	Promoter (<=1kb)	7	6061878	6098860	36983	2	27102	uc003spp.3	0	ENSG00000086232	EIF2AK1	eukaryotic translation initiation factor 2 alpha kinase 1	uc031swn.1;uc003spp.3;uc003spq.3;uc011jwm.1;uc003spr.1;uc003spk.3;uc003spl.3;uc010kte.3;uc010ktg.3;uc011jwl.2;uc010ktf.2;uc003spo.3;uc011jwn.1;uc010kth.1;uc011jwo.1;uc011jwp.2	100310846;27102;27102;27102;27102;5395;5395;5395;5395;5395;5395;7965;84132;84132;84132;84132	27610;0;0;0;-12549;-49880;-49880;-49880;-49880;-49880;-49880;49735;-45438;-45438;-45438;-45438
chr7	6432705	6433984	1280	*	Intron (uc003spw.3/5879, intron 3 of 6)	7	6414126	6443598	29473	1	5879	uc021zzg.1	18579	ENSG00000136238	RAC1	Rac family small GTPase 1	uc003spy.3;uc003spz.3;uc011jwt.2;uc003sqa.3;uc003sqb.3;uc003sqc.3;uc011jwu.2;uc011jwv.2;uc003sqd.4;uc011jww.1;uc003spw.3;uc003spx.3;uc021zzg.1;uc003spu.3	221955;221955;221955;221955;221955;221955;221955;221955;221955;221955;5879;5879;5879;84792	23438;28450;40614;53659;53659;53659;53659;53659;89865;53659;0;0;0;-44115
chr7	7139066	7140742	1677	*	Distal Intergenic	7	7115401	7136417	21017	2	100131257	uc021zzk.1	-2649	NA	LOC100131257	zinc finger protein 655 pseudogene	uc021zzk.1	100131257	-2649
chr7	8272286	8273627	1342	*	Promoter (1-2kb)	7	8152815	8275570	122756	2	3382	uc010ktr.3	1943	ENSG00000003147	ICA1	islet cell autoantigen 1	uc010ktr.3;uc003srm.3;uc003srn.5;uc003sro.5;uc003srq.4;uc003srr.4;uc010kts.4;uc003srs.2	3382;3382;3382;3382;3382;3382;3382;3382	0;0;0;0;0;0;0;0
chr7	12768616	12769213	598	*	Distal Intergenic	7	12726911	12730558	3648	1	10124	uc021zzq.1	41705	ENSG00000122644	ARL4A	ARF like GTPase 4A	uc003ssp.3;uc003ssq.3;uc003sss.3;uc021zzq.1	10124;10124;10124;10124	42164;42164;41705;41705
chr7	23841508	23842488	981	*	Intron (uc003sws.5/56164, intron 22 of 23)	7	23827599	23944365	116767	1	56164	uc003swv.1	13909	ENSG00000196335	STK31	serine/threonine kinase 31	uc003sws.5;uc003swt.5;uc011jze.3;uc010kuq.4;uc031swr.1;uc003swv.1	56164;56164;56164;56164;56164;56164	0;0;0;0;0;0
chr7	28242989	28244071	1083	*	Intron (uc011jzq.2/100128081, intron 2 of 3)	7	27870193	28220437	350245	2	221895	uc003szn.3	-22552	ENSG00000153814	JAZF1	JAZF zinc finger 1	uc011jzq.2;uc003szn.3	100128081;221895	0;-22552
chr7	47607952	47609033	1082	*	Intron (uc003tnw.3/64759, intron 1 of 30)	7	47314752	47621742	306991	2	64759	uc003tnw.3	12709	ENSG00000136205	TNS3	tensin 3	uc003tnw.3;uc010kyo.1	64759;64759	0;-28753
chr7	54848685	54849379	695	*	Distal Intergenic	7	54819940	54826939	7000	2	23480	uc003tqg.3	-21746	ENSG00000132432	SEC61G	SEC61 translocon subunit gamma	uc003tqf.3;uc003tqg.3	23480;23480	-21746;-21746
[truncated: 227 more rows]

## Sheet: KMT2D_independent_AE
Supplemental Table 9: Table S9, Integration analysis of all ChIP-seq data for KMT2D, GATA1, H3K4me1, H3K27ac.
[truncated: 9,641 more rows]

[truncated: 4 more sheets: KMT2D_dependent_AE_GREAT, KMT2D_independent_AE_GREAT, KMT2D_dependent_AE_Motif, KMT2D_independent_AE_Motif]
