# Supplementary material for: The H3K4 methyltransferase KMT2D is an essential cofactor for GATA1 at erythroid gene enhancers
Source: Research Square preprint supplement (doi:10.21203/rs.3.rs-7853319/v1), 2025-10-22
Supplement: Supplementary file 10 [file c5c8cc26c5ab75da384eef26.xlsx]

## Sheet: Table S4
Supplemental Table 4: KMT2D interacting proteins list by the Immunoprecipitation mass spectrometry (IP-Mass) in AID-KMT2D K562 cells.
Gene	logFC	AveExpr	t	P.Value	adj.P.Val	B	Peptides_K2D_1	Peptides_K2D_2	Peptides_IGG_1	Peptide_IGG_2
KMT2D	7.49289	10.9047	18.3679	3.66e-67	2.37e-64	160.071	123	130	0	0
PCNT	7.19655	10.7566	17.6415	1.32e-62	4.3e-60	147.126	98	108	0	0
KMT2C	7.09597	10.7063	17.3949	4.41e-61	9.53e-59	142.851	92	100	0	0
CREBBP	6.35002	10.3333	15.5663	3.18e-50	5.16e-48	113.025	56	58	0	0
MED12	6.33625	10.3264	15.5326	4.96e-50	6.44e-48	112.505	54	59	0	0
ANKRD17	5.80853	10.0626	14.2389	7.4e-43	8.01e-41	93.4468	39	39	0	0
KDM6A	5.78909	10.0528	14.1913	1.33e-42	1.24e-40	92.7762	37	40	0	0
MED14	5.65413	9.98525	13.8634	7.38e-41	5.99e-39	88.2254	34	36	0	0
CDK5RAP2	5.633	9.97464	13.8123	1.37e-40	9.89e-39	87.5254	33	36	0	0
PAXIP1	5.59235	9.95432	13.7139	4.5e-40	2.92e-38	86.1847	33	34	0	0
NIPBL	5.57398	9.94483	13.6694	7.69e-40	4.53e-38	85.5821	28	39	0	0
PRRC2A	5.57059	9.94339	13.6612	8.48e-40	4.53e-38	85.4707	32	34	0	0
MED1	5.56831	9.94242	13.6557	9.07e-40	4.53e-38	85.3959	35	31	0	0
MED13	5.54922	9.93278	13.6094	1.58e-39	7.32e-38	84.7723	33	32	0	0
PPP4R3A	5.45898	9.88767	13.3932	2.07e-38	8.96e-37	81.8832	31	30	0	0
NCOA6	5.43577	9.87603	13.3376	3.99e-38	1.62e-36	81.1477	30	30	0	0
MED23	5.38766	9.85199	13.222	1.55e-37	5.93e-36	79.6288	29	29	0	0
MED24	5.20282	9.75968	12.7767	2.68e-35	9.68e-34	73.8994	27	24	0	0
ZNF318	5.14858	9.73245	12.6455	1.19e-34	4.08e-33	72.2494	24	25	0	0
BOD1L1	5.08724	9.70173	12.4971	6.36e-34	2.06e-32	70.4027	22	25	0	0
SIPA1L1	5.048	9.68203	12.402	1.84e-33	5.7e-32	69.2311	20	26	0	0
EP300	4.99678	9.65659	12.2778	7.34e-33	2.16e-31	67.7143	22	22	0	0
PRR12	4.94624	9.63113	12.1552	2.84e-32	8e-31	66.2317	18	25	0	0
NCOA5	4.82644	9.5714	11.8642	6.73e-31	1.82e-29	62.7727	19	20	0	0
MED13L	4.82294	9.56959	11.8556	7.38e-31	1.92e-29	62.6727	18	21	0	0
ASH2L	4.81576	9.56595	11.8382	8.9e-31	2.22e-29	62.4682	17	22	0	0
HIRA	4.79031	9.55337	11.7763	1.73e-30	4.16e-29	61.745	19	19	0	0
PPP4R2	4.75239	9.53438	11.6841	4.63e-30	1.07e-28	60.6745	18	19	0	0
MED16	4.71236	9.51434	11.5867	1.3e-29	2.83e-28	59.5531	17	19	0	0
RBBP5	4.71213	9.51434	11.5862	1.31e-29	2.83e-28	59.5465	19	17	0	0
ZNF638	4.66107	9.4886	11.4619	4.85e-29	1.02e-27	58.1292	15	20	0	0
TLE3	4.63418	9.47531	11.3964	9.62e-29	1.95e-27	57.3884	17	17	0	0
PPP4C	4.54927	9.43286	11.1894	8.22e-28	1.62e-26	55.0748	16	16	0	0
EDC3	4.45904	9.38776	10.9689	7.8e-27	1.45e-25	52.6568	15	15	0	0
MED17	4.45904	9.38776	10.9689	7.8e-27	1.45e-25	52.6568	15	15	0	0
CHAMP1	4.45611	9.38626	10.9617	8.38e-27	1.51e-25	52.5789	14	16	0	0
CDK8	4.41091	9.36371	10.8509	2.56e-26	4.37e-25	51.3821	14	15	0	0
KIF14	4.41091	9.36371	10.8509	2.56e-26	4.37e-25	51.3821	14	15	0	0
MED15	4.36272	9.33965	10.7323	8.37e-26	1.39e-24	50.1152	14	14	0	0
NCOA3	4.34879	9.33273	10.6979	1.18e-25	1.91e-24	49.7505	12	16	0	0
DCP1A	4.25942	9.28811	10.4759	1.04e-24	1.65e-23	47.4241	13	13	0	0
DCP1B	4.20352	9.26035	10.3354	4.07e-24	6.01e-23	45.9775	12	13	0	0
MED27	4.20352	9.26035	10.3354	4.07e-24	6.01e-23	45.9775	12	13	0	0
NKTR	4.20352	9.26035	10.3354	4.07e-24	6.01e-23	45.9775	12	13	0	0
TRIM11	4.1944	9.25605	10.3124	5.09e-24	7.33e-23	45.7424	11	14	0	0
LZTS2	4.08714	9.20252	10.0387	6.87e-23	9.69e-22	42.9861	11	12	0	0
MED4	3.96234	9.13963	9.71705	1.36e-21	1.88e-20	39.8413	11	10	0	0
GTPBP1	3.961	9.13963	9.71378	1.4e-21	1.89e-20	39.8099	10	11	0	0
TRMT61B	3.89598	9.10682	9.54347	6.58e-21	8.54e-20	38.187	10	10	0	0
HSPA6	3.82447	9.07073	9.35393	3.58e-20	4.55e-19	36.4147	10	9	0	0
BAG3	3.80554	9.06342	9.30432	5.55e-20	6.92e-19	35.9567	8	11	0	0
WDR5	3.75079	9.03463	9.15675	2.02e-19	2.43e-18	34.6088	9	9	0	0
ZNF609	3.75079	9.03463	9.15675	2.02e-19	2.43e-18	34.6088	9	9	0	0
MARF1	3.73974	9.03061	9.12784	2.6e-19	3.07e-18	34.3473	8	10	0	0
HMBOX1	3.67197	8.99451	8.94257	1.28e-18	1.48e-17	32.6911	9	8	0	0
DCP2	3.66823	8.99451	8.93347	1.38e-18	1.52e-17	32.6105	8	9	0	0
LENG8	3.66823	8.99451	8.93347	1.38e-18	1.52e-17	32.6105	8	9	0	0
MED6	3.66823	8.99451	8.93347	1.38e-18	1.52e-17	32.6105	8	9	0	0
PLRG1	3.65777	8.98547	8.90238	1.8e-18	1.95e-17	32.3363	10	7	0	0
CDK12	3.58961	8.9544	8.71647	8.61e-18	8.73e-17	30.7161	8	8	0	0
CT45A10	3.58961	8.9544	8.71647	8.61e-18	8.73e-17	30.7161	8	8	0	0
TFG	3.58961	8.9544	8.71647	8.61e-18	8.73e-17	30.7161	8	8	0	0
UBN1	3.58961	8.9544	8.71647	8.61e-18	8.73e-17	30.7161	8	8	0	0
DYRK1A	3.58396	8.94937	8.69932	9.93e-18	9.92e-17	30.5684	9	7	0	0
MED25	3.57515	8.94937	8.67792	1.19e-17	1.17e-16	30.3844	7	9	0	0
MAU2	3.49674	8.90925	8.45935	7.15e-17	6.82e-16	28.5321	7	8	0	0
MED20	3.49674	8.90925	8.45935	7.15e-17	6.82e-16	28.5321	7	8	0	0
PABPC4	3.4837	8.89776	8.41899	9.92e-17	9.33e-16	28.1953	9	6	0	0
PPP1CA	3.40872	8.86411	8.21195	5.2e-16	4.69e-15	26.4928	7	7	0	0
SETD1A	3.40872	8.86411	8.21195	5.2e-16	4.69e-15	26.4928	7	7	0	0
TROAP	3.40872	8.86411	8.21195	5.2e-16	4.69e-15	26.4928	7	7	0	0
MIS18A	3.30179	8.8125	7.91355	5.32e-15	4.73e-14	24.1142	6	7	0	0
AKAP9	3.28527	8.79739	7.86112	7.95e-15	6.97e-14	23.7057	8	5	0	0
PCID2	3.20163	8.76088	7.629	4.56e-14	3.89e-13	21.9288	6	6	0	0
CABIN1	3.1913	8.76513	7.60822	5.32e-14	4.48e-13	21.772	4	9	0	0
PHF19	3.17609	8.75224	7.55936	7.62e-14	6.34e-13	21.4062	5	7	0	0
MAML1	3.11114	8.72501	7.37719	2.87e-13	2.33e-12	20.062	4	8	0	0
CCNK	3.07512	8.70063	7.26622	6.36e-13	4.91e-12	19.2599	5	6	0	0
DCAF7	3.07512	8.70063	7.26622	6.36e-13	4.91e-12	19.2599	5	6	0	0
MED28	3.07512	8.70063	7.26622	6.36e-13	4.91e-12	19.2599	5	6	0	0
MED29	3.07512	8.70063	7.26622	6.36e-13	4.91e-12	19.2599	5	6	0	0
CDK9	2.95917	8.64038	6.92424	6.88e-12	4.8e-11	16.8648	5	5	0	0
MED10	2.95917	8.64038	6.92424	6.88e-12	4.8e-11	16.8648	5	5	0	0
MED31	2.95917	8.64038	6.92424	6.88e-12	4.8e-11	16.8648	5	5	0	0
MED8	2.95917	8.64038	6.92424	6.88e-12	4.8e-11	16.8648	5	5	0	0
RPL31	2.95917	8.64038	6.92424	6.88e-12	4.8e-11	16.8648	5	5	0	0
SMARCC2	2.95917	8.64038	6.92424	6.88e-12	4.8e-11	16.8648	5	5	0	0
UPF1	2.95917	8.64038	6.92424	6.88e-12	4.8e-11	16.8648	5	5	0	0
DLAT	2.94822	8.62826	6.88404	9.03e-12	6.24e-11	16.5913	6	4	0	0
DHX30	2.88459	8.58923	6.68782	3.36e-11	2.27e-10	15.2783	7	3	0	0
RAB11A	2.88459	8.58923	6.68782	3.36e-11	2.27e-10	15.2783	7	3	0	0
ARHGAP19	2.82897	8.58923	6.55887	7.81e-11	5.07e-10	14.4341	3	7	0	0
EED	2.82897	8.58923	6.55887	7.81e-11	5.07e-10	14.4341	3	7	0	0
CXXC1	2.82162	8.568	6.51618	1.03e-10	6.42e-10	14.1601	5	4	0	0
EB01BP2	2.82162	8.568	6.51618	1.03e-10	6.42e-10	14.1601	5	4	0	0
MAML2	2.82162	8.568	6.51618	1.03e-10	6.42e-10	14.1601	5	4	0	0
CCNC	2.80723	8.568	6.48295	1.27e-10	7.66e-10	13.9467	4	5	0	0
HCFC1	2.80723	8.568	6.48295	1.27e-10	7.66e-10	13.9467	4	5	0	0
TAF6	2.80723	8.568	6.48295	1.27e-10	7.66e-10	13.9467	4	5	0	0
TNRC6A	2.80723	8.568	6.48295	1.27e-10	7.66e-10	13.9467	4	5	0	0
MED19	2.67017	8.49563	6.08533	1.53e-09	8.06e-09	11.4843	4	4	0	0
MED21	2.67017	8.49563	6.08533	1.53e-09	8.06e-09	11.4843	4	4	0	0
MED30	2.67017	8.49563	6.08533	1.53e-09	8.06e-09	11.4843	4	4	0	0
MLLT1	2.67017	8.49563	6.08533	1.53e-09	8.06e-09	11.4843	4	4	0	0
OIP5	2.67017	8.49563	6.08533	1.53e-09	8.06e-09	11.4843	4	4	0	0
PAGR1	2.67017	8.49563	6.08533	1.53e-09	8.06e-09	11.4843	4	4	0	0
SMARCE1	2.67017	8.49563	6.08533	1.53e-09	8.06e-09	11.4843	4	4	0	0
YLPM1	2.67017	8.49563	6.08533	1.53e-09	8.06e-09	11.4843	4	4	0	0
CPSF4	2.64791	8.47736	6.01535	2.33e-09	1.2e-08	11.0678	5	3	0	0
HOOK2	2.61964	8.47736	5.95112	3.42e-09	1.68e-08	10.6881	3	5	0	0
MED22	2.61964	8.47736	5.95112	3.42e-09	1.68e-08	10.6881	3	5	0	0
MED7	2.61964	8.47736	5.95112	3.42e-09	1.68e-08	10.6881	3	5	0	0
TBK1	2.61964	8.47736	5.95112	3.42e-09	1.68e-08	10.6881	3	5	0	0
EDC4	2.53948	12.224	7.68607	2.98e-14	2.58e-13	22.2454	57	57	10	4
CPSF3	2.49632	8.40498	5.60519	2.54e-08	1.21e-07	8.72026	4	3	0	0
TAF5	2.49632	8.40498	5.60519	2.54e-08	1.21e-07	8.72026	4	3	0	0
YTHDF3	2.49632	8.40498	5.60519	2.54e-08	1.21e-07	8.72026	4	3	0	0
CDC5L	2.4935	10.9696	6.68051	3.52e-11	2.36e-10	15.1507	22	24	3	2
DDX18	2.48312	8.40498	5.57554	3e-08	1.37e-07	8.55652	3	4	0	0
LAS1L	2.48312	8.40498	5.57554	3e-08	1.37e-07	8.55652	3	4	0	0
POGZ	2.48312	8.40498	5.57554	3e-08	1.37e-07	8.55652	3	4	0	0
MOV10	2.40875	8.356	5.37444	9.1e-08	3.99e-07	7.47304	5	2	0	0
AGO2	2.3097	8.31434	5.1264	3.4e-07	1.42e-06	6.19035	3	3	0	0
CEP43	2.3097	8.31434	5.1264	3.4e-07	1.42e-06	6.19035	3	3	0	0
RPL34	2.3097	8.31434	5.1264	3.4e-07	1.42e-06	6.19035	3	3	0	0
RPL7L1	2.3097	8.31434	5.1264	3.4e-07	1.42e-06	6.19035	3	3	0	0
TANK	2.3097	8.31434	5.1264	3.4e-07	1.42e-06	6.19035	3	3	0	0
MED18	2.25738	8.28363	4.99742	6.6e-07	2.75e-06	5.54739	4	2	0	0
KLHL11	2.23981	8.28363	4.95852	8.04e-07	3.26e-06	5.3562	2	4	0	0
LMAN2	2.23981	8.28363	4.95852	8.04e-07	3.26e-06	5.3562	2	4	0	0
SUZ12	2.23981	8.28363	4.95852	8.04e-07	3.26e-06	5.3562	2	4	0	0
UBR5	2.23981	8.28363	4.95852	8.04e-07	3.26e-06	5.3562	2	4	0	0
ASF1A	2.07106	8.19298	4.55529	5.72e-06	2.05e-05	3.46696	3	2	0	0
CDC42EP4	2.07106	8.19298	4.55529	5.72e-06	2.05e-05	3.46696	3	2	0	0
CSNK2A1	2.07106	8.19298	4.55529	5.72e-06	2.05e-05	3.46696	3	2	0	0
FBLL1	2.07106	8.19298	4.55529	5.72e-06	2.05e-05	3.46696	3	2	0	0
MED9	2.07106	8.19298	4.55529	5.72e-06	2.05e-05	3.46696	3	2	0	0
OGT	2.07106	8.19298	4.55529	5.72e-06	2.05e-05	3.46696	3	2	0	0
PPP1R18	2.07106	8.19298	4.55529	5.72e-06	2.05e-05	3.46696	3	2	0	0
SEC31A	2.07106	8.19298	4.55529	5.72e-06	2.05e-05	3.46696	3	2	0	0
WDR36	2.07106	8.19298	4.55529	5.72e-06	2.05e-05	3.46696	3	2	0	0
XRN2	2.07106	8.19298	4.55529	5.72e-06	2.05e-05	3.46696	3	2	0	0
CCDC137	2.06536	8.19298	4.54275	6.07e-06	2.06e-05	3.41063	2	3	0	0
CCDC61	2.06536	8.19298	4.54275	6.07e-06	2.06e-05	3.41063	2	3	0	0
DPY30	2.06536	8.19298	4.54275	6.07e-06	2.06e-05	3.41063	2	3	0	0
ELL	2.06536	8.19298	4.54275	6.07e-06	2.06e-05	3.41063	2	3	0	0
KHDC4	2.06536	8.19298	4.54275	6.07e-06	2.06e-05	3.41063	2	3	0	0
NFAT5	2.06536	8.19298	4.54275	6.07e-06	2.06e-05	3.41063	2	3	0	0
RRP1	2.06536	8.19298	4.54275	6.07e-06	2.06e-05	3.41063	2	3	0	0
SRSF10	2.06536	8.19298	4.54275	6.07e-06	2.06e-05	3.41063	2	3	0	0
TAF4	2.06536	8.19298	4.54275	6.07e-06	2.06e-05	3.41063	2	3	0	0
UBAP2	2.06536	8.19298	4.54275	6.07e-06	2.06e-05	3.41063	2	3	0	0
AFF4	1.87752	8.09939	4.11523	4.11e-05	0.000128912	1.5862	1	4	0	0
AKAP8L	1.82633	8.07163	4.00057	6.68e-05	0.000190864	1.12737	2	2	0	0
ATP5F1C	1.82633	8.07163	4.00057	6.68e-05	0.000190864	1.12737	2	2	0	0
C4B	1.82633	8.07163	4.00057	6.68e-05	0.000190864	1.12737	2	2	0	0
CEP20	1.82633	8.07163	4.00057	6.68e-05	0.000190864	1.12737	2	2	0	0
IGFBP3	1.82633	8.07163	4.00057	6.68e-05	0.000190864	1.12737	2	2	0	0
LM0	1.82633	8.07163	4.00057	6.68e-05	0.000190864	1.12737	2	2	0	0
MED11	1.82633	8.07163	4.00057	6.68e-05	0.000190864	1.12737	2	2	0	0
NOL9	1.82633	8.07163	4.00057	6.68e-05	0.000190864	1.12737	2	2	0	0
PITX1	1.82633	8.07163	4.00057	6.68e-05	0.000190864	1.12737	2	2	0	0
PRKACA	1.82633	8.07163	4.00057	6.68e-05	0.000190864	1.12737	2	2	0	0
RBBP6	1.82633	8.07163	4.00057	6.68e-05	0.000190864	1.12737	2	2	0	0
SMARCD2	1.82633	8.07163	4.00057	6.68e-05	0.000190864	1.12737	2	2	0	0
TAF7	1.82633	8.07163	4.00057	6.68e-05	0.000190864	1.12737	2	2	0	0
TBL3	1.82633	8.07163	4.00057	6.68e-05	0.000190864	1.12737	2	2	0	0
DKC1	1.81824	10.4491	4.84413	1.42e-06	5.64e-06	4.66468	13	12	4	1
PRRC2C	1.77349	12.5669	5.59341	2.71e-08	1.28e-07	8.41227	55	55	17	7
C7orf50	1.70245	8.00874	3.72498	0.000203712	0.000550871	0.0774443	3	1	0	0
GPATCH4	1.70245	8.00874	3.72498	0.000203712	0.000550871	0.0774443	3	1	0	0
TAF2	1.69876	8.00874	3.71689	0.00021027	0.000566245	0.0477441	1	3	0	0
SEC16A	1.6906	11.2425	4.80375	1.74e-06	6.8e-06	4.41981	21	22	8	2
STAU1	1.54836	10.6831	4.19847	2.87e-05	9.18e-05	1.75613	12	15	4	2
SNRPN	1.46144	7.88739	3.18479	0.00148302	0.00340099	-1.76134	2	1	0	0
AFF1	1.45251	7.88739	3.16534	0.00158505	0.003452	-1.82232	1	2	0	0
CEP350	1.45251	7.88739	3.16534	0.00158505	0.003452	-1.82232	1	2	0	0
EXOSC3	1.45251	7.88739	3.16534	0.00158505	0.003452	-1.82232	1	2	0	0
EXOSC8	1.45251	7.88739	3.16534	0.00158505	0.003452	-1.82232	1	2	0	0
EXOSC9	1.45251	7.88739	3.16534	0.00158505	0.003452	-1.82232	1	2	0	0
EZH2	1.45251	7.88739	3.16534	0.00158505	0.003452	-1.82232	1	2	0	0
MAP1A	1.45251	7.88739	3.16534	0.00158505	0.003452	-1.82232	1	2	0	0
NHP2	1.45251	7.88739	3.16534	0.00158505	0.003452	-1.82232	1	2	0	0
NUP155	1.45251	7.88739	3.16534	0.00158505	0.003452	-1.82232	1	2	0	0
RAMACL	1.45251	7.88739	3.16534	0.00158505	0.003452	-1.82232	1	2	0	0
SAP18	1.45251	7.88739	3.16534	0.00158505	0.003452	-1.82232	1	2	0	0
SMARCB1	1.45251	7.88739	3.16534	0.00158505	0.003452	-1.82232	1	2	0	0
TAF9B	1.45251	7.88739	3.16534	0.00158505	0.003452	-1.82232	1	2	0	0
ARID3A	1.3891	10.0525	3.62852	0.000296114	0.000781211	-0.422807	8	8	3	1
RRP1B	1.34751	10.3646	3.59124	0.000341392	0.000897018	-0.573769	9	11	5	1
SMARCC1	1.30113	10.0073	3.38411	0.000735397	0.00182916	-1.26819	8	7	3	1
PCM1	1.27123	12.2015	3.99453	6.85e-05	0.000194874	0.798449	35	37	24	4
BCAS2	1.25619	10.1103	3.29168	0.0010227	0.0024492	-1.58056	7	9	2	2
SMARCA4	1.19246	10.5066	3.22085	0.00130981	0.00306882	-1.83643	9	12	4	2
CPSF1	1.11733	9.67735	2.80356	0.00512951	0.0102432	-3.01497	5	6	2	1
AMOTL1	1.08794	7.70315	2.33252	0.0198257	0.0333548	-4.067	1	1	0	0
ARID1A	1.08794	7.70315	2.33252	0.0198257	0.0333548	-4.067	1	1	0	0
ARID3B	1.08794	7.70315	2.33252	0.0198257	0.0333548	-4.067	1	1	0	0
DMTN	1.08794	7.70315	2.33252	0.0198257	0.0333548	-4.067	1	1	0	0
EAF1	1.08794	7.70315	2.33252	0.0198257	0.0333548	-4.067	1	1	0	0
EXOSC2	1.08794	7.70315	2.33252	0.0198257	0.0333548	-4.067	1	1	0	0
GLYR1	1.08794	7.70315	2.33252	0.0198257	0.0333548	-4.067	1	1	0	0
HPR	1.08794	7.70315	2.33252	0.0198257	0.0333548	-4.067	1	1	0	0
IBTK	1.08794	7.70315	2.33252	0.0198257	0.0333548	-4.067	1	1	0	0
LIPE	1.08794	7.70315	2.33252	0.0198257	0.0333548	-4.067	1	1	0	0
MIB1	1.08794	7.70315	2.33252	0.0198257	0.0333548	-4.067	1	1	0	0
PPP1R12A	1.08794	7.70315	2.33252	0.0198257	0.0333548	-4.067	1	1	0	0
RNF149	1.08794	7.70315	2.33252	0.0198257	0.0333548	-4.067	1	1	0	0
TAF8	1.08794	7.70315	2.33252	0.0198257	0.0333548	-4.067	1	1	0	0
UTP4	1.08794	7.70315	2.33252	0.0198257	0.0333548	-4.067	1	1	0	0
TOP2A	1.08073	12.4975	3.42097	0.000643375	0.00163745	-1.32157	42	40	15	12
RPL35A	1.02563	9.6171	2.54529	0.0110335	0.0205769	-3.68869	5	5	1	2
